# Supplementary material for: Meditation and vacation effects have an impact on disease-associated molecular phenotypes
Source: PubMed Central journal article supplement (PMC5022094; doi:10.1038/tp.2016.164), 2016-08-30
Supplement: tp2016164x2.pdf [file tp2016164x2.pdf]

**Table S3. Individual Gene** Differential expression signatures for baseline vs. followup for all group comparisons all samples (columns 2 and 3), vacation arm versus regular meditator arm (column 4 and 5), and novice vs. regular meditators (columns 6 and 7). The test statistics (columns 2, 4, and 6) and p values (columns 3, 5, and 7) for each gene tested are provided. The p value thresholds corresponding to a 5% FDR for columns 3, 5, and 7 are 0.0008, 0.0013, 0.0020, respectively.

| <u>gene_symbol</u> | <u>baseline versus followup</u><br><u>test stat</u> | <u>baseline versus followup</u><br><u>pvalue</u> | <u>follow up regular versus</u><br><u>vacation test stat</u> | <u>follow up regular versus</u><br><u>vacation pvalue</u> | <u>follow up regular</u><br><u>versus novices test</u> | <u>follow up regular versus</u><br><u>novices pvalue</u> |
|--------------------|-----------------------------------------------------|--------------------------------------------------|--------------------------------------------------------------|-----------------------------------------------------------|--------------------------------------------------------|----------------------------------------------------------|
| 1/2-SBSRNA4        | 0.668193707                                         | 0.50577502                                       | -1.525323838                                                 | 0.132651089                                               | -1.212065312                                           | 0.230555243                                              |
| A1BG               | 0.279596098                                         | 0.780449607                                      | -0.594984143                                                 | 0.554184511                                               | -0.108864675                                           | 0.913697344                                              |
| A1BG-AS1           | 1.354105113                                         | 0.179202149                                      | -0.540621067                                                 | 0.590853435                                               | -0.302437195                                           | 0.7634346                                                |
| A2LD1              | -0.199519956                                        | 0.842320617                                      | -0.631304846                                                 | 0.530338731                                               | -1.17930584                                            | 0.243241602                                              |
| A2M                | 1.18232864                                          | 0.240289683                                      | 0.48038963                                                   | 0.632769964                                               | 0.879644729                                            | 0.382795263                                              |
| A4GALT             | -0.258017147                                        | 0.797001721                                      | 1.449006111                                                  | 0.152758765                                               | 0.654969795                                            | 0.517076549                                              |
| AAAS               | -0.523703738                                        | 0.60181327                                       | 0.169118768                                                  | 0.866295773                                               | 1.577854063                                            | 0.120208219                                              |
| AACS               | 1.566373419                                         | 0.120883624                                      | 2.078225455                                                  | 0.042154907                                               | 1.991401459                                            | 0.05130235                                               |
| AAGAB              | -0.554828523                                        | 0.580432533                                      | 1.860485939                                                  | 0.067924581                                               | 2.98797082                                             | 0.004157018                                              |
| AAK1               | 1.678403359                                         | 0.096849335                                      | 0.340115444                                                  | 0.735006888                                               | 1.262032957                                            | 0.212145982                                              |
| AAMP               | -0.086534672                                        | 0.931239816                                      | 2.460985758                                                  | 0.016874612                                               | 2.549305801                                            | 0.013547773                                              |
| AANAT              | -0.213098009                                        | 0.831747992                                      | -0.600077688                                                 | 0.550808209                                               | 0.143174177                                            | 0.886664402                                              |
| AARS               | 0.394307379                                         | 0.69431692                                       | 2.203366572                                                  | 0.0315824                                                 | 2.879653692                                            | 0.005622415                                              |
| AARS2              | 2.364612138                                         | 0.020268837                                      | 1.571062126                                                  | 0.121646042                                               | 3.057380213                                            | 0.003414162                                              |
| AARSD1             | 0.264456459                                         | 0.792052346                                      | 2.213690244                                                  | 0.030824603                                               | 3.406268187                                            | 0.001222124                                              |
| AASDH              | 0.295199476                                         | 0.768543317                                      | 1.237070461                                                  | 0.221081023                                               | 1.642597278                                            | 0.106046912                                              |
| AASDHPPT           | -0.336399744                                        | 0.737377738                                      | -0.328376669                                                 | 0.743817752                                               | -0.858859374                                           | 0.39406421                                               |
| AASS               | 0.238533208                                         | 0.812027302                                      | -1.31976653                                                  | 0.192134741                                               | 0.174749919                                            | 0.861903764                                              |
| AATF               | -1.61237196                                         | 0.110495094                                      | 2.596084175                                                  | 0.011944757                                               | 2.938699337                                            | 0.004772923                                              |
| AATK               | -1.883590544                                        | 0.062953706                                      | -0.606639682                                                 | 0.546473894                                               | -0.90182687                                            | 0.370995143                                              |
| ABAT               | -2.765195864                                        | 0.006942419                                      | -0.274136528                                                 | 0.784960501                                               | -0.874461094                                           | 0.385586466                                              |
| ABCA1              | -1.901265168                                        | 0.060570293                                      | -0.302426428                                                 | 0.763416482                                               | -1.735486482                                           | 0.088131762                                              |
| ABCA10             | 0.426732091                                         | 0.67062632                                       | 0.226044665                                                  | 0.821966925                                               | 0.580186005                                            | 0.564106731                                              |
| ABCA11P            | 1.355189286                                         | 0.178857858                                      | 0.47254963                                                   | 0.638320252                                               | 1.499285212                                            | 0.139392811                                              |
| ABCA13             | -2.298153176                                        | 0.0239459                                        | 1.456000701                                                  | 0.150822041                                               | 0.111536298                                            | 0.911588226                                              |
| ABCA2              | 0.903282539                                         | 0.368864836                                      | -2.611281449                                                 | 0.011481327                                               | -2.017427476                                           | 0.048432927                                              |
| ABCA3              | 1.299517775                                         | 0.197191844                                      | -0.433885138                                                 | 0.665992782                                               | 0.444430974                                            | 0.658436694                                              |
| ABCA5              | 1.874271201                                         | 0.064241855                                      | -0.941959133                                                 | 0.350147804                                               | -1.330862                                              | 0.188605292                                              |
| ABCA6              | 1.335885202                                         | 0.185063321                                      | 0.861093323                                                  | 0.392757256                                               | 0.0177211                                              | 0.985924071                                              |
| ABCA7              | 0.280603859                                         | 0.779679008                                      | -0.309746357                                                 | 0.757871752                                               | 0.372278166                                            | 0.711085013                                              |
| ABCA9              | 1.271748254                                         | 0.206844391                                      | 0.008010429                                                  | 0.993636352                                               | -0.476888003                                           | 0.635289842                                              |
| ABCB1              | 1.286946824                                         | 0.201519079                                      | 0.377156143                                                  | 0.707443674                                               | 0.726899455                                            | 0.470302678                                              |
| ABCB10             | 0.936416881                                         | 0.351645128                                      | 0.353191803                                                  | 0.725234077                                               | -1.499324347                                           | 0.139382686                                              |
| ABCB4              | 0.733858661                                         | 0.465003732                                      | 2.148227425                                                  | 0.035913718                                               | 1.76298179                                             | 0.083336584                                              |
| ABCB6              | 1.474651065                                         | 0.143908216                                      | 1.326420504                                                  | 0.189936047                                               | 1.771219666                                            | 0.081942864                                              |
| ABCB7              | 0.398661332                                         | 0.691117418                                      | 1.134737248                                                  | 0.26118585                                                | 1.87310648                                             | 0.066254459                                              |
| ABCB8              | 0.019544353                                         | 0.984451512                                      | 0.381108912                                                  | 0.704524629                                               | 1.346406586                                            | 0.183573339                                              |
| ABCB9              | 1.256298835                                         | 0.212363371                                      | 1.272422234                                                  | 0.208336047                                               | 2.175359301                                            | 0.033822527                                              |
| ABCC1              | 2.780114977                                         | 0.00665646                                       | 1.424067365                                                  | 0.159822356                                               | 1.147141896                                            | 0.256180063                                              |
| ABCC10             | 1.943352229                                         | 0.055199561                                      | 1.628406999                                                  | 0.108896918                                               | 1.589848217                                            | 0.11747563                                               |
| ABCC13             | -3.619660505                                        | 0.000494249                                      | 1.000885267                                                  | 0.321068779                                               | 0.53623341                                             | 0.593912097                                              |
| ABCC2              | 0.783841195                                         | 0.435257547                                      | -0.309267525                                                 | 0.758234073                                               | -1.093320294                                           | 0.278914443                                              |
| ABCC3              | -2.716559774                                        | 0.007954319                                      | 1.795936045                                                  | 0.077750305                                               | 1.641688592                                            | 0.106235838                                              |
| ABCC4              | -0.079403057                                        | 0.936894                                         | 0.920316288                                                  | 0.36124611                                                | 1.619152255                                            | 0.111009701                                              |
| ABCC5              | 0.274441772                                         | 0.784394351                                      | -0.230782547                                                 | 0.818301551                                               | 0.017797061                                            | 0.985863742                                              |
| ABCC6              | -1.105708359                                        | 0.271894469                                      | 1.955186513                                                  | 0.055419302                                               | 1.958698052                                            | 0.055114108                                              |
| ABCC9              | -1.332342342                                        | 0.186219596                                      | 2.14896078                                                   | 0.035852859                                               | 0.74504571                                             | 0.459346572                                              |
| ABCD1              | -1.015562556                                        | 0.312647654                                      | -0.411444873                                                 | 0.682273394                                               | -0.599122418                                           | 0.551497265                                              |
| ABCD2              | 1.833327604                                         | 0.070166288                                      | -0.278423562                                                 | 0.781684379                                               | -0.27002827                                            | 0.788126961                                              |
| ABCD3              | 1.038155469                                         | 0.302068224                                      | 1.405130485                                                  | 0.165353319                                               | 0.63111636                                             | 0.530521267                                              |
| ABCD4              | 0.76794676                                          | 0.444593704                                      | 2.111038974                                                  | 0.039120732                                               | 3.034562208                                            | 0.003643471                                              |
| ABCE1              | 1.134601907                                         | 0.259651855                                      | 0.096345397                                                  | 0.923580713                                               | -0.354429067                                           | 0.724342955                                              |
| ABCF1              | -0.532943562                                        | 0.595428449                                      | 2.739693616                                                  | 0.008172788                                               | 2.822476734                                            | 0.006576586                                              |
| ABCF2              | -0.263711213                                        | 0.792624724                                      | 1.924550781                                                  | 0.059230181                                               | 2.62920692                                             | 0.011016744                                              |
| ABCF3              | -0.254124848                                        | 0.799997461                                      | 1.878688843                                                  | 0.065350935                                               | 2.243397171                                            | 0.028827837                                              |
| ABCG1              | -3.629692894                                        | 0.000477873                                      | 0.553801653                                                  | 0.581858305                                               | 0.525669148                                            | 0.601184846                                              |
| ABCG2              | -1.590268658                                        | 0.11539387                                       | 0.108417165                                                  | 0.914041601                                               | -0.019586531                                           | 0.984442537                                              |
| ABHD1              | 0.106247431                                         | 0.915630115                                      | -0.547621575                                                 | 0.586066774                                               | -0.354158325                                           | 0.724544724                                              |
| ABHD10             | 1.36403319                                          | 0.17606805                                       | -0.137515134                                                 | 0.891103237                                               | 0.176918073                                            | 0.860208379                                              |
| ABHD11             | -0.188266325                                        | 0.851105377                                      | -1.393659025                                                 | 0.168775039                                               | -0.896021625                                           | 0.374060717                                              |
| ABHD12             | -0.504364458                                        | 0.61527754                                       | 1.282429957                                                  | 0.204829279                                               | 1.611364739                                            | 0.112699215                                              |
| ABHD12B            | -0.499341065                                        | 0.618796823                                      | -1.254687586                                                 | 0.214659744                                               | -1.550228281                                           | 0.126696588                                              |

|         |              |             |              |             |              |             |
|---------|--------------|-------------|--------------|-------------|--------------|-------------|
| ABHD13  | 0.201507207  | 0.840771377 | -0.677875803 | 0.500564661 | -1.392496857 | 0.169253587 |
| ABHD14A | 0.47615649   | 0.635153916 | -0.422102103 | 0.674521959 | 0.635253628  | 0.527839445 |
| ABHD14B | 1.070986723  | 0.287131133 | 0.990352714  | 0.326144129 | 1.953658462  | 0.05572255  |
| ABHD15  | 2.745242957  | 0.007342409 | -1.800155516 | 0.077073568 | -1.710237663 | 0.092734218 |
| ABHD16A | -3.173454496 | 0.002081284 | -0.510651043 | 0.61154715  | -1.876682572 | 0.06575346  |
| ABHD16B | 0.720039742  | 0.473426386 | -2.649684737 | 0.010382311 | -2.137592836 | 0.036910789 |
| ABHD2   | -3.112646137 | 0.002507631 | 0.54633506   | 0.586945843 | 0.561942193  | 0.57638834  |
| ABHD3   | -0.515628698 | 0.607418797 | -1.896981369 | 0.062848229 | -2.525971587 | 0.014380674 |
| ABHD4   | -3.586647964 | 0.000551978 | -0.193545715 | 0.847212552 | -0.398759834 | 0.691580282 |
| ABHD5   | -4.35135743  | 3.66E-05    | -0.961487245 | 0.340326476 | -1.432864353 | 0.157432501 |
| ABHD6   | 0.577249884  | 0.565258269 | -0.421961897 | 0.674623709 | 0.393007395  | 0.695799889 |
| ABHD8   | 0.447218428  | 0.655826394 | -1.807315618 | 0.075936474 | -0.299357413 | 0.765770936 |
| ABI1    | -0.107242795 | 0.914842753 | -1.439819902 | 0.155331756 | -2.786804158 | 0.00724544  |
| ABI2    | 1.996278596  | 0.049023767 | 0.187274039  | 0.852103927 | 0.13440078   | 0.893565522 |
| ABI3    | -0.433143774 | 0.665979992 | -0.025014389 | 0.980129952 | 0.363126719  | 0.717871614 |
| ABL1    | 0.064231578  | 0.94893287  | 0.55376321   | 0.581884445 | 0.932210451  | 0.355212818 |
| ABL2    | 0.164562456  | 0.8696693   | 1.046484585  | 0.299709269 | 0.569830701  | 0.571061969 |
| ABLIM1  | 1.299291299  | 0.197269186 | 1.268201382  | 0.209828379 | 2.189799279  | 0.032703082 |
| ABLIM2  | 1.186972998  | 0.238462274 | 1.61676414   | 0.111393769 | 2.059634949  | 0.044073626 |
| ABLIM3  | -5.266199015 | 9.91E-07    | 1.488794304  | 0.141996893 | 0.341356512  | 0.734107398 |
| ABO     | 2.528257391  | 0.013263901 | -0.38767033  | 0.699689008 | 0.046988035  | 0.962689232 |
| ABP1    | -0.637823194 | 0.525260355 | -0.939657511 | 0.351317405 | -0.820137194 | 0.415600583 |
| ABR     | -1.691777062 | 0.094259781 | 0.57914803   | 0.564747559 | 0.351236569  | 0.726723393 |
| ABT1    | -0.097236587 | 0.922761689 | -2.062403941 | 0.043689514 | -1.673572784 | 0.099768702 |
| ABTB1   | -2.39832147  | 0.018602663 | -0.173023609 | 0.863239483 | 0.075345856  | 0.940206931 |
| ABTB2   | -0.405549021 | 0.686067462 | -0.860306921 | 0.393186878 | -1.965922003 | 0.054251868 |
| ACAA1   | 1.531501243  | 0.129266016 | -0.029073717 | 0.976906306 | -0.276511735 | 0.783168775 |
| ACAA2   | -0.056247455 | 0.955273375 | 4.187235486  | 9.79E-05    | 3.94773127   | 0.000221786 |
| ACACA   | 2.012464294  | 0.047257038 | 1.053886405  | 0.296336011 | 1.089573194  | 0.28054816  |
| ACACB   | 3.896040431  | 0.000191301 | 1.190096639  | 0.23889077  | 1.551876688  | 0.126301732 |
| ACAD10  | 1.616005228  | 0.109706074 | 2.684191212  | 0.009477657 | 3.46319857   | 0.001027642 |
| ACAD11  | 1.218456182  | 0.226337388 | -0.475441747 | 0.636270349 | -1.881555919 | 0.065075884 |
| ACAD8   | -0.7021556   | 0.48445241  | 0.411065375  | 0.682550059 | -0.343350338 | 0.732615222 |
| ACAD9   | 0.286127905  | 0.775458899 | 1.309515267  | 0.195559602 | 4.100833176  | 0.000133945 |
| ACADM   | 1.379136328  | 0.171380263 | 0.29312805   | 0.770477818 | -0.060493376 | 0.951977161 |
| ACADS   | -0.092560167 | 0.926465339 | 0.680481893  | 0.498925791 | -0.076945799 | 0.938939768 |
| ACADSB  | 0.900471306  | 0.370349986 | -0.887535467 | 0.378481962 | -1.943215551 | 0.057001652 |
| ACADVL  | 0.60677732   | 0.545575507 | 2.601732499  | 0.011770564 | 2.242608777  | 0.028881764 |
| ACAP1   | -0.423473444 | 0.672992686 | 1.266944665  | 0.210274237 | 2.440537201  | 0.017840394 |
| ACAP2   | 0.198670764  | 0.842982829 | -0.802689679 | 0.425453993 | -2.193378801 | 0.032430673 |
| ACAP3   | 0.460836243  | 0.646063541 | -0.836074073 | 0.406568457 | -0.094725975 | 0.924869202 |
| ACAT1   | 1.789205572  | 0.077054258 | 0.612004638  | 0.542943173 | 2.103869288  | 0.039874047 |
| ACAT2   | 3.530832732  | 0.000664362 | 2.445553261  | 0.01754125  | 2.778848937  | 0.007402904 |
| ACBD3   | 0.240138339  | 0.810786712 | -0.987315599 | 0.32761752  | -1.50170309  | 0.138768287 |
| ACBD4   | 2.732839874  | 0.007601537 | 0.383989687  | 0.702400038 | 1.22561772   | 0.225450608 |
| ACBD5   | 0.065614612  | 0.947834871 | -2.240641935 | 0.028921252 | -3.203648439 | 0.002236093 |
| ACBD6   | 0.825073206  | 0.411581729 | 1.226901201  | 0.224851371 | 2.074756355  | 0.042596759 |
| ACCN2   | 0.498054922  | 0.619699304 | -1.294159868 | 0.200775336 | 0.208705981  | 0.835431877 |
| ACCN3   | 2.692482889  | 0.008503439 | -1.513288494 | 0.135674719 | -0.026072925 | 0.979291473 |
| ACCS    | 1.634126847  | 0.105838096 | 1.67188891   | 0.099971    | 0.993615149  | 0.324666417 |
| ACD     | -0.964758806 | 0.337333929 | -0.381018513 | 0.704591337 | -0.972470478 | 0.334980914 |
| ACE     | 1.240849676  | 0.217989707 | -0.250620485 | 0.802999419 | 0.458743795  | 0.648186247 |
| ACER1   | -1.001736715 | 0.31924283  | 2.038104484  | 0.046140671 | 1.757729392  | 0.084235458 |
| ACER2   | 0.418740443  | 0.676435567 | 1.931631497  | 0.058330098 | 0.486651504  | 0.628396612 |
| ACER3   | 0.921608143  | 0.359276154 | 0.009589145  | 0.992382224 | 0.090444783  | 0.928255144 |
| ACHE    | -2.029841942 | 0.04542112  | 0.12637791   | 0.899872927 | 0.375908653  | 0.708399153 |
| ACIN1   | -0.386745333 | 0.69988705  | -0.635678274 | 0.527503897 | -0.236031217 | 0.814265972 |
| ACLY    | -0.100902763 | 0.919859322 | 1.290207373  | 0.202134583 | 0.85826094   | 0.394391682 |
| ACN9    | -0.410313562 | 0.682582477 | -1.147159945 | 0.256058518 | -1.55325813  | 0.125971583 |
| ACO1    | -0.44831546  | 0.655037664 | 1.842080498  | 0.070613312 | 1.472776981  | 0.146386297 |
| ACO2    | -0.892103512 | 0.374792938 | 1.807834611  | 0.075854602 | 1.611997272  | 0.112561214 |
| ACOT1   | 0.255021718  | 0.79930691  | 0.893867391  | 0.375112797 | 0.269275304  | 0.788703363 |
| ACOT11  | 0.169109211  | 0.866102461 | 1.103514126  | 0.274393198 | 0.861225715  | 0.392770972 |
| ACOT13  | -0.691310429 | 0.491207102 | -1.956857827 | 0.055217574 | -1.658101862 | 0.102865288 |
| ACOT2   | 1.793241851  | 0.076401684 | -2.37652821  | 0.020821882 | -1.897737786 | 0.062868277 |
| ACOT4   | -0.854896626 | 0.394951408 | -0.13217194  | 0.895308946 | -0.293986906 | 0.769850255 |
| ACOT7   | -2.184244187 | 0.03162844  | -0.108487084 | 0.913986387 | 0.697136682  | 0.488589266 |
| ACOT8   | -1.259155784 | 0.211334712 | 0.518347646  | 0.606201402 | 0.550027175  | 0.58447877  |
| ACOT9   | -1.63588628  | 0.105468486 | 2.129460965  | 0.03750214  | 1.379878949  | 0.173085556 |
| ACOX1   | -4.056502633 | 0.000108151 | 0.405001913  | 0.686976426 | 0.773565217  | 0.442427636 |
| ACOX3   | -0.21402689  | 0.831025821 | 1.740973523  | 0.087027882 | 1.940631059  | 0.057322058 |
| ACP1    | -0.899060447 | 0.371096753 | -1.546034869 | 0.127573483 | -0.754992918 | 0.453403596 |

|          |              |             |              |             |              |             |
|----------|--------------|-------------|--------------|-------------|--------------|-------------|
| ACP2     | -1.208643304 | 0.23006759  | 0.603874938  | 0.548297942 | 0.169045468  | 0.866367454 |
| ACP5     | -1.386805315 | 0.169036606 | -0.321890646 | 0.74870091  | 0.192971192  | 0.84767676  |
| ACP6     | 0.933291937  | 0.353246674 | -0.085036203 | 0.932527508 | 0.380329768  | 0.705133405 |
| ACPL2    | 1.696401638  | 0.09337757  | -0.076625665 | 0.939186896 | -0.071495435 | 0.943257116 |
| ACPP     | -1.170790918 | 0.244905559 | -0.399989804 | 0.69064364  | -1.161247442 | 0.250446641 |
| ACRBP    | -4.213418248 | 6.11E-05    | 0.227103823  | 0.821147178 | 0.351354199  | 0.726635635 |
| ACRC     | 3.300965767  | 0.001397378 | 0.651515978  | 0.517304737 | 0.831086188  | 0.409439717 |
| ACSBG1   | -1.025822388 | 0.307812949 | 0.232834565  | 0.816715305 | -0.949090723 | 0.346635383 |
| ACSF2    | 0.308157132  | 0.758697773 | 1.110097612  | 0.271570132 | 0.414809593  | 0.679859497 |
| ACSF3    | 1.326205919  | 0.188235165 | 2.442686296  | 0.017667673 | 2.15472859   | 0.035480229 |
| ACSL1    | -0.121111266 | 0.903881584 | -0.334046705 | 0.739557566 | -1.072403018 | 0.288119551 |
| ACSL3    | -0.730331453 | 0.467145481 | 0.156194359  | 0.876426003 | -1.042123898 | 0.301813661 |
| ACSL4    | 0.093647861  | 0.925603755 | -0.359865683 | 0.72026378  | -1.916475547 | 0.06039173  |
| ACSL5    | 0.17103274   | 0.864594321 | -0.631178516 | 0.530420735 | -0.303701608 | 0.762476049 |
| ACSL6    | 1.876104246  | 0.063986751 | 0.129956957  | 0.897053286 | 0.87785868   | 0.383755548 |
| ACSM1    | 1.091467362  | 0.278074266 | 0.793737235  | 0.43060643  | 0.476117182  | 0.635835453 |
| ACSM3    | 1.489633431  | 0.139929254 | 0.809848377  | 0.421360618 | -0.006532709 | 0.994810809 |
| ACSS1    | 0.606660571  | 0.545652645 | 2.442092085  | 0.017693978 | 2.102654796  | 0.039984524 |
| ACSS2    | -1.672515565 | 0.098007596 | 2.16474389   | 0.034564763 | 2.43146387   | 0.018248692 |
| ACTA1    | -0.829917601 | 0.408851966 | -0.584626385 | 0.561082146 | -0.655894084 | 0.514566867 |
| ACTA2    | -1.231960235 | 0.221276103 | 1.454879258  | 0.151131257 | -0.095104713 | 0.924569729 |
| ACTB     | -2.183077908 | 0.031717118 | 1.455356542  | 0.150999595 | 1.552240217  | 0.126214786 |
| ACTG1    | -1.578482349 | 0.118076244 | 2.21997775   | 0.030370964 | 2.60850582   | 0.011627424 |
| ACTL6A   | 1.729134508  | 0.087324242 | 0.50533464   | 0.615252171 | 1.53817247   | 0.129614482 |
| ACTN1    | -1.85311719  | 0.067248141 | 0.594208797  | 0.554699367 | 0.427171285  | 0.670885689 |
| ACTN3    | -0.156886537 | 0.875696995 | -1.693212342 | 0.095817644 | -0.013872653 | 0.988980678 |
| ACTN4    | -1.881080944 | 0.063298436 | -0.559880878 | 0.577731763 | -0.665811473 | 0.508253538 |
| ACTR10   | -0.49006099  | 0.625321645 | 0.602655711  | 0.54910331  | 1.038702067  | 0.303388763 |
| ACTR1A   | -1.894443286 | 0.061481051 | 1.165380137  | 0.248668791 | 1.803652046  | 0.076643166 |
| ACTR1B   | 2.682663797  | 0.008737117 | -0.495547386 | 0.622099289 | -0.601189298 | 0.550129617 |
| ACTR2    | -0.549425885 | 0.584117739 | -0.154479599 | 0.877771643 | -1.445596836 | 0.153840292 |
| ACTR3    | -0.263764767 | 0.792583589 | 0.438082232  | 0.662965309 | -0.204098078 | 0.839013671 |
| ACTR3B   | -2.444423999 | 0.016521562 | 1.525989324  | 0.132485474 | 1.511410981  | 0.136283044 |
| ACTR3C   | -0.646528747 | 0.51963529  | -2.084071896 | 0.041599791 | -3.15852707  | 0.002550953 |
| ACTR5    | 2.748025333  | 0.007285397 | 1.551865285  | 0.126172404 | 2.701407853  | 0.009108873 |
| ACTR6    | 0.486615897  | 0.627751549 | 0.042816719  | 0.965995726 | 0.115271067  | 0.908640879 |
| ACTR8    | 1.10861122   | 0.270646616 | 0.895153004  | 0.374431063 | 0.692385435  | 0.491544507 |
| ACVR1    | -1.781585343 | 0.078298871 | 2.402828775  | 0.019512096 | 1.241581295  | 0.219544674 |
| ACVR1B   | 0.30642306   | 0.760013099 | 1.040459395  | 0.302474485 | 0.585375882  | 0.560636726 |
| ACVR1C   | 1.692168722  | 0.094184803 | 0.078367853  | 0.937807073 | -0.23839849  | 0.812438597 |
| ACVR2A   | 2.788587576  | 0.0064989   | -0.142814181 | 0.886935378 | 0.642084844  | 0.523426959 |
| ACVR2B   | 2.47606404   | 0.015216274 | 0.36228371   | 0.718465958 | 0.654763557  | 0.515289201 |
| ACVRL1   | -2.836486468 | 0.005670565 | 0.883021673  | 0.38089535  | 0.88407435   | 0.380420171 |
| ACY1     | 1.471667268  | 0.14471108  | -0.857099695 | 0.394942053 | -1.798202038 | 0.077513148 |
| ACY3     | 0.731855091  | 0.466219634 | 0.469271639  | 0.640647094 | 0.68218633   | 0.497921422 |
| ACYP1    | 2.175725509  | 0.032281169 | -1.123268915 | 0.26598357  | -0.3632096   | 0.717810047 |
| ACYP2    | -2.240755362 | 0.027582905 | -0.301110254 | 0.764414795 | -0.328807333 | 0.743522656 |
| ADA      | 1.605071375  | 0.112094311 | -0.077676206 | 0.938354839 | 0.175784255  | 0.861094885 |
| ADAL     | 1.514676782  | 0.133471223 | 0.655280389  | 0.514896031 | 1.560047522  | 0.124359017 |
| ADAM1    | 1.627406618  | 0.107259464 | 0.221292242  | 0.825647559 | 0.509574116  | 0.612343794 |
| ADAM10   | 0.406097139  | 0.685666198 | -1.196838827 | 0.236272483 | -2.752000646 | 0.007957888 |
| ADAM11   | 2.897800595  | 0.004751674 | 0.943525955  | 0.349353053 | 0.438409543  | 0.662769001 |
| ADAM12   | 0.45565145   | 0.649773423 | -2.611249649 | 0.011482279 | -1.263377383 | 0.211666173 |
| ADAM15   | 1.01902724   | 0.311009344 | 2.567656834  | 0.012857568 | 2.403368679  | 0.019566771 |
| ADAM17   | 0.991877226  | 0.324002162 | 0.542460515  | 0.589594163 | -0.345570275 | 0.730955045 |
| ADAM19   | -0.832450527 | 0.407429064 | 0.190635421  | 0.849481595 | 0.261862363  | 0.794384324 |
| ADAM22   | 2.023232264  | 0.046112087 | -2.023598274 | 0.047659895 | -1.458496864 | 0.150266385 |
| ADAM23   | 1.992056481  | 0.049493795 | -0.394706243 | 0.694517549 | 0.454597409  | 0.65114885  |
| ADAM28   | 2.266510406  | 0.0258949   | 0.191758008  | 0.848606205 | 0.783553201  | 0.436589983 |
| ADAM8    | -0.555552134 | 0.579939791 | -0.045686701 | 0.963718    | -0.746284071 | 0.458604278 |
| ADAM9    | 0.098047164  | 0.922119895 | 1.534237795  | 0.130446349 | -0.340388339 | 0.73483235  |
| ADAMTS1  | 1.436610012  | 0.154407505 | -0.995183125 | 0.323809877 | -0.155150757 | 0.877258003 |
| ADAMTS10 | 2.373345719  | 0.019824903 | -4.082532191 | 0.00013906  | -2.058245057 | 0.044211574 |
| ADAMTS13 | 1.444055464  | 0.152307251 | -0.11090034  | 0.912080925 | 0.823664214  | 0.413609858 |
| ADAMTS14 | -0.669956443 | 0.504656072 | -1.92812712  | 0.058774098 | -1.953114286 | 0.055788592 |
| ADAMTS17 | 0.798799174  | 0.426577475 | 2.357723277  | 0.021806033 | 0.944631048  | 0.348888228 |
| ADAMTS4  | 1.296075663  | 0.198369767 | 0.738709306  | 0.463083231 | -0.020429011 | 0.983773453 |
| ADAMTS5  | -0.900691261 | 0.37023365  | -0.251435704 | 0.802372205 | -1.40351356  | 0.165961614 |
| ADAMTS6  | 0.101239052  | 0.919593149 | -1.15615259  | 0.252391944 | -1.067222243 | 0.290431614 |
| ADAMTSL2 | 1.305133011  | 0.195281449 | 0.527110927  | 0.600141036 | 1.897432149  | 0.062909377 |
| ADAMTSL4 | -1.096010762 | 0.276092204 | -0.461752514 | 0.645998135 | -1.2353766   | 0.221826493 |
| ADAMTSL5 | 1.681632689  | 0.096218797 | -0.283002833 | 0.778189318 | 0.711069982  | 0.479979836 |

|         |              |             |              |             |              |             |
|---------|--------------|-------------|--------------|-------------|--------------|-------------|
| ADAP1   | -0.547950108 | 0.585126307 | -0.558162792 | 0.578896556 | -0.678606147 | 0.50017058  |
| ADAP2   | 1.061557307  | 0.291368341 | 1.621430765  | 0.110387483 | 1.710470925  | 0.092690808 |
| ADAR    | -2.162313796 | 0.033332614 | 0.671527342  | 0.504569196 | -0.722200029 | 0.473164015 |
| ADARB1  | 2.515492005  | 0.013719388 | 0.927105869  | 0.357740331 | 1.642772096  | 0.106010596 |
| ADARB2  | -1.483565615 | 0.141530223 | 1.281000361  | 0.205327505 | -0.347059765 | 0.729841856 |
| ADAT1   | 0.756683558  | 0.451279334 | -0.442445254 | 0.659824126 | -0.391638415 | 0.696805513 |
| ADAT2   | 1.753980678  | 0.08294766  | -0.818544317 | 0.416420264 | 1.045262862  | 0.300373689 |
| ADAT3   | 1.295755119  | 0.198479726 | -3.154472743 | 0.002555277 | -2.463780629 | 0.016831682 |
| ADC     | 0.578170922  | 0.564639101 | 1.476933224  | 0.145140685 | 1.701164595  | 0.094435754 |
| ADCK1   | -1.493022311 | 0.1390413   | -1.302657805 | 0.19787613  | 0.579392608  | 0.564638139 |
| ADCK2   | 0.877137704  | 0.382822329 | 1.932268699  | 0.058249673 | 2.258478484  | 0.027813271 |
| ADCK3   | -0.896522881 | 0.372442275 | 1.629927303  | 0.108574263 | 1.84765538   | 0.069914143 |
| ADCK4   | -0.626988948 | 0.53230488  | -0.766982586 | 0.446224437 | -0.978481335 | 0.332026959 |
| ADCK5   | 1.258164004  | 0.211691392 | 0.367751956  | 0.714406182 | 0.495481265  | 0.622191123 |
| ADCY3   | -0.669646921 | 0.504852454 | 1.140260666  | 0.258897192 | 0.553449973  | 0.582149104 |
| ADCY4   | -1.887264804 | 0.062451843 | 0.001838968  | 0.998539072 | 0.059806491  | 0.952521782 |
| ADCY5   | 1.075369421  | 0.285176193 | 0.365870018  | 0.715802456 | 0.505010583  | 0.615524801 |
| ADCY6   | -0.335109101 | 0.738347705 | 0.719213931  | 0.474917179 | 1.516037753  | 0.135111058 |
| ADCY7   | 1.849484523  | 0.067776065 | -1.42272492  | 0.160209661 | -1.904839131 | 0.061919735 |
| ADCY9   | 0.981663619  | 0.328981763 | -1.312638472 | 0.194511335 | -0.301225944 | 0.764353198 |
| ADD1    | -1.219648223 | 0.225887261 | 1.375345843  | 0.174350154 | 1.666227057  | 0.101229338 |
| ADD2    | 1.23658584   | 0.219561552 | -0.236553309 | 0.813842615 | 0.2577321    | 0.797554469 |
| ADD3    | 1.670157764  | 0.098474574 | 0.291370155  | 0.77181501  | -0.394194062 | 0.694928631 |
| ADH5    | 2.321961102  | 0.022565964 | 0.167925204  | 0.867230379 | 1.350899808  | 0.182138025 |
| ADHFE1  | 2.713534701  | 0.008021491 | -2.220455059 | 0.030336769 | -2.580994523 | 0.012486718 |
| ADI1    | -1.014433568 | 0.313182754 | 1.763279518  | 0.083157563 | 1.530520309  | 0.131494182 |
| ADIPOR1 | -4.00691708  | 0.000129183 | -0.798501966 | 0.427859553 | -0.989148901 | 0.326827209 |
| ADIPOR2 | -1.500270696 | 0.137156901 | 1.425096708  | 0.159525876 | 1.915788443  | 0.060481055 |
| ADK     | 1.965648391  | 0.052521763 | 0.872363038  | 0.386632576 | 0.734622431  | 0.465621777 |
| ADM     | -1.56922646  | 0.120217425 | 0.37135078   | 0.711738826 | -0.914741679 | 0.364232853 |
| ADM2    | 0.551191641  | 0.582912076 | 2.582896388  | 0.012360631 | 1.959194477  | 0.055054483 |
| ADNP    | 0.050279703  | 0.960014505 | 0.507378511  | 0.613826591 | 0.101613035  | 0.919425269 |
| ADNP2   | -0.325911175 | 0.745272483 | 0.2700741    | 0.788068594 | -0.486299047 | 0.62864488  |
| ADO     | 1.001309506  | 0.319448081 | -1.735449987 | 0.088008988 | -2.222486162 | 0.030288668 |
| ADORA1  | 0.431575551  | 0.667115234 | 1.160415589  | 0.250666972 | 0.348390212  | 0.728848024 |
| ADORA2A | -0.103477066 | 0.917821994 | 1.454990152  | 0.151100658 | 2.884978873  | 0.005540408 |
| ADORA2B | 0.129479084  | 0.897276809 | 0.286486651  | 0.775533422 | -0.436488058 | 0.664153924 |
| ADORA3  | 3.267815336  | 0.001551392 | -0.086533464 | 0.931342485 | -0.734518466 | 0.465684613 |
| ADPGK   | -0.691997094 | 0.490777907 | -0.177601058 | 0.859659423 | -0.50300105  | 0.616927905 |
| ADPRH   | -1.734652842 | 0.08633617  | 1.951094089  | 0.055915923 | 1.396618552  | 0.168016116 |
| ADPRHL1 | -1.221380295 | 0.225234371 | 0.028191478  | 0.97760689  | -0.507507538 | 0.613783376 |
| ADPRHL2 | -1.144378475 | 0.255598651 | 0.648401739  | 0.519301938 | 0.310325263  | 0.757460802 |
| ADRA2A  | -2.53128783  | 0.013157788 | 1.290979323  | 0.201868573 | -0.105344759 | 0.916477099 |
| ADRB1   | 0.33853523   | 0.735773775 | -2.670440134 | 0.009829157 | -2.042044907 | 0.045847253 |
| ADRB2   | 1.013523224  | 0.313614671 | -3.997643505 | 0.000184293 | -4.072093905 | 0.000147342 |
| ADRBK1  | -0.82250305  | 0.41303444  | 0.245055649  | 0.807284358 | 0.461027449  | 0.646557006 |
| ADRBK2  | 0.774567573  | 0.440690684 | 1.668611822  | 0.100622183 | 0.749193861  | 0.456862821 |
| ADRM1   | -1.119806678 | 0.26587145  | -0.111425284 | 0.911666507 | -0.015974851 | 0.987310996 |
| ADSL    | 1.015505599  | 0.312674633 | 2.246380008  | 0.02852969  | 3.306921876  | 0.001647622 |
| ADSS    | 0.865865049  | 0.388940545 | 1.182736368  | 0.241772999 | 1.661261684  | 0.102226533 |
| ADSSL1  | -0.061798366 | 0.95086485  | -0.087610056 | 0.930490501 | 1.496873267  | 0.140018015 |
| AEBP1   | 1.977466486  | 0.051147746 | 0.972592791  | 0.334822714 | 1.507497788  | 0.137280554 |
| AEBP2   | 0.102484583  | 0.91860739  | -1.351023338 | 0.181971499 | -1.83780248  | 0.071375965 |
| AEN     | 3.053053125  | 0.003003133 | 1.915683275  | 0.060374054 | 2.457832474  | 0.017084804 |
| AES     | 0.771204693  | 0.442670626 | -0.9264388   | 0.358083794 | 0.260827486  | 0.795178309 |
| AFAP1   | 0.78692351   | 0.433460454 | 0.204397815  | 0.838763193 | 0.06540144   | 0.94808632  |
| AFAP1L2 | -1.526673675 | 0.130461797 | 1.008068921  | 0.317637702 | -0.108667337 | 0.913853157 |
| AFF1    | -0.541959144 | 0.589229056 | -0.091494702 | 0.92741699  | -2.097445164 | 0.040461455 |
| AFF2    | -0.832134731 | 0.407606302 | 0.171460536  | 0.864462639 | 0.975147184  | 0.333663341 |
| AFF3    | 1.340651007  | 0.18351645  | 1.303705843  | 0.197520764 | 0.700140411  | 0.486726054 |
| AFF4    | 0.669291279  | 0.505078148 | -1.326384536 | 0.189947881 | -2.400061954 | 0.019727394 |
| AFG3L1P | 3.438853612  | 0.000898013 | 1.498724607  | 0.139406345 | 2.446203938  | 0.017589579 |
| AFG3L2  | 0.358693487  | 0.720691498 | 3.543290585  | 0.00079146  | 3.977357834  | 0.000201305 |
| AFMID   | -1.059848459 | 0.292140785 | 2.432571898  | 0.01812025  | 1.553984242  | 0.125798328 |
| AFTPH   | -1.960606113 | 0.053117482 | 1.330400503  | 0.188630045 | 0.695549132  | 0.489575615 |
| AGA     | 1.888821848  | 0.062240185 | 1.153750402  | 0.253367694 | 0.634166095  | 0.528543708 |
| AGAP1   | 0.513696005  | 0.608763941 | -3.089649146 | 0.003083615 | -1.046718419 | 0.299707563 |
| AGAP2   | -1.299349682 | 0.197249246 | -0.595830559 | 0.553622738 | -0.023120119 | 0.981636299 |
| AGAP3   | 0.607712571  | 0.544957771 | 1.396809533  | 0.167829915 | 0.195683445  | 0.845563288 |
| AGAP4   | -0.241137684 | 0.810014573 | 0.217780087  | 0.82837017  | -0.142798114 | 0.886960035 |
| AGAP5   | 1.398163985  | 0.165610424 | -0.47694856  | 0.635203465 | 1.555577744  | 0.125418775 |
| AGAP6   | 2.127823305  | 0.036174511 | -3.291150054 | 0.001706973 | -1.686159953 | 0.097306006 |

|         |              |             |              |             |              |             |
|---------|--------------|-------------|--------------|-------------|--------------|-------------|
| AGAP7   | -1.347394972 | 0.18134419  | -1.005937429 | 0.318653169 | 0.875901937  | 0.384809345 |
| AGAP8   | 0.041337245  | 0.967121555 | -0.358595849 | 0.721208548 | -0.173897646 | 0.862570377 |
| AGBL2   | 1.788419492  | 0.077181885 | -0.785125891 | 0.435597446 | 0.361436228  | 0.719127787 |
| AGBL3   | 0.428105286  | 0.669630126 | 0.383435317  | 0.702808704 | -0.237373072 | 0.813230022 |
| AGBL5   | 1.13218205   | 0.26066204  | -1.22353924  | 0.226108161 | -0.151674099 | 0.879986797 |
| AGER    | -0.48597425  | 0.628204573 | 0.006698427  | 0.094678616 | 1.670238884  | 0.100429467 |
| AGFG1   | 0.675286811  | 0.501280555 | -0.252468798 | 0.801577755 | -0.815480956 | 0.418237543 |
| AGFG2   | 0.080258256  | 0.936215792 | -0.1124341   | 0.910870164 | 0.673788121  | 0.503206096 |
| AGGF1   | 1.196228502  | 0.234850327 | 0.148917843  | 0.882138648 | -0.61555102  | 0.540674143 |
| AGK     | 4.239158149  | 5.56E-05    | -0.898495546 | 0.372662263 | 0.957495995  | 0.342415298 |
| AGL     | 1.010761059  | 0.314927633 | -0.503136424 | 0.616787071 | -1.400230527 | 0.166937425 |
| AGMAT   | -0.331604775 | 0.740983472 | 1.007489221  | 0.317913662 | 2.441407425  | 0.017801669 |
| AGPAT1  | -2.66829866  | 0.009089508 | 0.212850068  | 0.83219547  | 0.408139657  | 0.684720965 |
| AGPAT2  | -1.234157084 | 0.220460594 | 0.565946068  | 0.573628886 | -0.183262151 | 0.855251464 |
| AGPAT3  | -0.333501213 | 0.739556687 | 1.408319597  | 0.164411647 | 1.014246565  | 0.314809027 |
| AGPAT4  | -1.733785463 | 0.086490865 | 0.105426977  | 0.91640332  | 0.132761951  | 0.894855553 |
| AGPAT5  | 0.952821569  | 0.343314562 | 0.733147479  | 0.466442035 | 0.130474058  | 0.896656982 |
| AGPAT6  | 1.503023539  | 0.136446503 | 2.410550917  | 0.01914181  | 3.389396766  | 0.001286158 |
| AGPAT9  | -3.295266533 | 0.001422792 | 1.969665469  | 0.053692433 | 1.007819685  | 0.317857807 |
| AGPHD1  | 1.152489211  | 0.252270183 | -0.927198767 | 0.357692517 | 0.106990335  | 0.915177418 |
| AGPS    | 0.679328911  | 0.498728983 | -0.417745316 | 0.677686604 | -0.957804602 | 0.342260999 |
| AGRN    | 0.582091418  | 0.562007268 | 0.391328744  | 0.696998239 | -1.514858422 | 0.135409026 |
| AGTPBP1 | 0.778241112  | 0.438533752 | -0.096195733 | 0.92369905  | -0.269500192 | 0.788531196 |
| AGTRAP  | -2.953894568 | 0.00403317  | -0.358875855 | 0.721000184 | -0.530459636 | 0.597881814 |
| AGXT2L2 | 1.657414076  | 0.101029919 | -0.560581778 | 0.577256906 | 0.368824899  | 0.713643187 |
| AHCTF1  | -0.39212673  | 0.695921459 | 0.576762883  | 0.56634708  | -0.381033122 | 0.70461437  |
| AHCY    | -0.351399158 | 0.726136679 | 2.101988777  | 0.039937968 | 2.116781513  | 0.038715819 |
| AHCYL1  | -0.656377954 | 0.513309587 | -0.034027241 | 0.972973078 | -0.503861283 | 0.616327094 |
| AHCYL2  | 0.071161929  | 0.943431857 | -0.32901265  | 0.743339504 | 0.042220863  | 0.966472179 |
| AHDC1   | 0.88001293   | 0.381271458 | -0.589767415 | 0.557653208 | -0.216639989 | 0.829272895 |
| AHI1    | 2.44730819   | 0.016398563 | 0.080190973  | 0.936363357 | 0.225898113  | 0.822099659 |
| AHNAK   | -0.088707463 | 0.929517842 | 2.648406737  | 0.010417283 | 1.940844683  | 0.057295517 |
| AHNAK2  | 1.086550423  | 0.280230361 | 1.458203764  | 0.15021603  | 1.188690399  | 0.239556908 |
| AHR     | 0.020889133  | 0.983381827 | -0.14146426  | 0.887996831 | -1.374341261 | 0.174788196 |
| AHRR    | 2.348918609  | 0.02108876  | 0.510624815  | 0.611565403 | 0.8799101    | 0.382652713 |
| AHSA1   | -0.829485561 | 0.409094969 | 2.700562325  | 0.009074202 | 2.744988543  | 0.008109008 |
| AHSA2   | 2.996184534  | 0.003559333 | -0.873069854 | 0.386250451 | -0.813216404 | 0.419523671 |
| AHSP    | -4.023569603 | 0.000121717 | -0.244957236 | 0.80736019  | -0.898327385 | 0.372841193 |
| AIDA    | 1.18008974   | 0.857500024 | -0.663593775 | 0.509597864 | -0.653399666 | 0.516161357 |
| AIF1    | -0.333683402 | 0.739419664 | 0.199702868  | 0.842416362 | 0.337181859  | 0.737235038 |
| AIFM1   | 0.103226077  | 0.918020605 | 2.120138158  | 0.038313803 | 2.384877579  | 0.020480245 |
| AIFM2   | 2.057975609  | 0.042578509 | -0.338309736 | 0.736359919 | 0.247398527  | 0.805500829 |
| AIFM3   | 0.863537901  | 0.390211101 | -0.564540388 | 0.574578514 | -0.299443683 | 0.765705462 |
| AIG1    | -0.855673165 | 0.394523982 | 1.902581572  | 0.062098479 | 1.372278818  | 0.175425594 |
| AIM1    | 2.058075137  | 0.042568731 | 1.255060872  | 0.214525193 | 1.292970763  | 0.201307793 |
| AIM1L   | -0.777223309 | 0.43913074  | -1.531945783 | 0.13101044  | -0.596728059 | 0.553083746 |
| AIM2    | -0.607287053 | 0.545238783 | -0.597625022 | 0.552432684 | -1.841405525 | 0.070838444 |
| AIMP1   | 1.175723338  | 0.242905921 | 0.308924204  | 0.758493889 | 0.482275954  | 0.631481774 |
| AIMP2   | -1.492190995 | 0.139258712 | 0.330365573  | 0.742322464 | 0.628491207  | 0.532226596 |
| AIP     | -0.201680375 | 0.840636407 | 1.167057401  | 0.2479963   | 1.267993268  | 0.210024953 |
| AIRE    | -0.203031606 | 0.839583396 | -0.565579134 | 0.5738767   | -2.007752549 | 0.049483031 |
| AJAP1   | 1.980094335  | 0.050846418 | -0.279985593 | 0.780491669 | -1.309520137 | 0.195683119 |
| AK1     | -0.584696742 | 0.560261653 | -0.344922257 | 0.731409224 | 1.070795856  | 0.288835423 |
| AK2     | 1.548021909  | 0.125239294 | 0.239776353  | 0.811354925 | 1.522107038  | 0.133585817 |
| AK3     | 1.716428456  | 0.089634609 | -0.168437051 | 0.86682956  | -0.615945164 | 0.540415827 |
| AK4     | 0.686324978  | 0.49432937  | 0.20034658   | 0.841915278 | 0.555115545  | 0.581017075 |
| AK5     | 2.652661513  | 0.009487734 | 1.77849968   | 0.080599694 | 2.365000378  | 0.021504611 |
| AKAP1   | 3.10823485   | 0.002541526 | 2.034975833  | 0.046464746 | 2.448760175  | 0.01747748  |
| AKAP10  | 0.584751027  | 0.560225309 | -0.853112389 | 0.3971309   | -1.628700448 | 0.108966287 |
| AKAP11  | 1.3335863    | 0.185812991 | -1.177576018 | 0.243808676 | -1.976171854 | 0.053048308 |
| AKAP12  | -3.304580748 | 0.001381479 | 2.357418394  | 0.021822326 | -0.393848562 | 0.695182256 |
| AKAP13  | -0.577687031 | 0.564964356 | 0.570790707  | 0.57036188  | 0.288031087  | 0.774381819 |
| AKAP17A | 2.115620928  | 0.037229099 | -3.265877773 | 0.001840504 | -2.3994759   | 0.019755984 |
| AKAP3   | 1.332810667  | 0.186066439 | 1.525105966  | 0.132705345 | 2.201546111  | 0.031816584 |
| AKAP5   | -0.56192862  | 0.575606386 | -1.350753573 | 0.182057428 | -1.64188782  | 0.106194393 |
| AKAP6   | 1.211301395  | 0.229052796 | 1.13549523   | 0.260870929 | 2.009837682  | 0.04925507  |
| AKAP7   | 1.514036606  | 0.133633334 | 0.634866356  | 0.528029578 | -0.128853818 | 0.897933049 |
| AKAP8   | 0.495661698  | 0.62138017  | -0.10733003  | 0.914900156 | 0.280131512  | 0.78040049  |
| AKAP8L  | -0.545135116 | 0.587052396 | -1.325484603 | 0.190244146 | 0.020073841  | 0.984055522 |
| AKAP9   | 0.184250294  | 0.85424497  | -0.613503216 | 0.541959035 | -0.18158018  | 0.856565101 |
| AKD1    | 1.483380611  | 0.14157926  | -1.550532093 | 0.126491687 | -1.55110397  | 0.126486705 |
| AKIP1   | -1.023568868 | 0.308870531 | 0.177092156  | 0.860057295 | -0.504476826 | 0.615897342 |

|             |              |             |              |             |              |             |
|-------------|--------------|-------------|--------------|-------------|--------------|-------------|
| AKIRIN1     | -0.042433629 | 0.966250046 | -1.174998946 | 0.244829904 | -2.29531553  | 0.025466908 |
| AKIRIN2     | -1.650592049 | 0.102419792 | -1.182164642 | 0.241997929 | -2.389593829 | 0.0202437   |
| AKIRIN2-AS1 | 0.229395919  | 0.819098478 | -2.003350036 | 0.049852508 | -2.686206086 | 0.009483422 |
| AKNA        | -1.427414586 | 0.157032214 | -1.172847794 | 0.245684707 | -0.965861088 | 0.338249019 |
| AKR1A1      | 0.32585588   | 0.745314176 | 2.061848224  | 0.043744284 | 2.730678168  | 0.008425629 |
| AKR1B1      | 0.765205805  | 0.446215371 | 2.549696472  | 0.013466469 | 3.894808801  | 0.000263472 |
| AKR1C1      | -0.081912093 | 0.934904367 | 2.770342556  | 0.007525022 | 2.694457235  | 0.009278411 |
| AKR1C2      | 1.087677315  | 0.279735197 | 1.234801923  | 0.221918049 | 0.957274093  | 0.342526274 |
| AKR1C3      | 0.788324246  | 0.432645223 | 0.068737245  | 0.945436853 | 0.928475011  | 0.357129355 |
| AKR1E2      | 0.80125114   | 0.425164463 | 0.811857924  | 0.420215825 | 0.024413255  | 0.980609397 |
| AKR7A2      | -0.38713249  | 0.699601472 | 2.052234225  | 0.044701289 | 2.583662921  | 0.012400913 |
| AKR7A3      | 0.009843691  | 0.992168486 | -0.39694983  | 0.692871543 | -0.425962621 | 0.671761007 |
| AKR7L       | 0.909041513  | 0.365834207 | -0.192951355 | 0.847675846 | 1.117284707  | 0.268623261 |
| AKT1        | -1.296247896 | 0.198310703 | -1.492621939 | 0.140993907 | -1.791912823 | 0.078527343 |
| AKT1S1      | -1.12007829  | 0.265756338 | -3.11739146  | 0.00284608  | -3.09504775  | 0.003064908 |
| AKT2        | -0.852827043 | 0.396091946 | -1.20593114  | 0.23277461  | -0.553106546 | 0.058238265 |
| AKT3        | 2.299726952  | 0.023852435 | -0.225919805 | 0.822063575 | 0.421564916  | 0.674949686 |
| AKTIP       | -0.630323754 | 0.530131385 | -0.231778625 | 0.817531469 | 0.870065633  | 0.387963242 |
| ALAD        | -0.413941313 | 0.679933592 | -0.356151789 | 0.723028179 | 0.062878258  | 0.950086406 |
| ALAS1       | -1.067282952 | 0.288790389 | 0.415133217  | 0.679586764 | 0.095205404  | 0.924490113 |
| ALAS2       | -2.867858164 | 0.005181777 | 0.594478709  | 0.554520109 | 0.824495799  | 0.413141434 |
| ALB         | 1.337445916  | 0.184555672 | 0.278224326  | 0.781836546 | -0.761095171 | 0.449779951 |
| ALCAM       | 1.040275002  | 0.301088305 | 0.929019989  | 0.356755965 | -0.676284772 | 0.501631877 |
| ALDH16A1    | -0.075411212 | 0.9400603   | 1.693301579  | 0.095800565 | 1.918842998  | 0.060084814 |
| ALDH18A1    | 1.007567374  | 0.316450288 | 2.461501599  | 0.016852729 | 2.664768829  | 0.01035592  |
| ALDH1A1     | -0.853434954 | 0.395756719 | 1.084789496  | 0.282534722 | 1.271335682  | 0.208842444 |
| ALDH1B1     | 1.784803149  | 0.07777129  | 0.963474381  | 0.339337332 | 2.09562092   | 0.040629628 |
| ALDH1L2     | 0.349666808  | 0.727431953 | 2.864168772  | 0.005824346 | 1.189305462  | 0.239316832 |
| ALDH2       | -2.577790857 | 0.011622503 | 1.619077573  | 0.110893988 | 0.812889263  | 0.419709665 |
| ALDH3A2     | 2.131652603  | 0.035848949 | 2.289509647  | 0.025733565 | 2.886632662  | 0.005515167 |
| ALDH3B1     | -1.308802743 | 0.194040427 | 0.489852899  | 0.626098677 | -0.493111378 | 0.623853982 |
| ALDH4A1     | -0.186438792 | 0.852533784 | 2.03241942   | 0.046731004 | 2.280883811  | 0.026364351 |
| ALDH5A1     | 0.750772145  | 0.454811273 | 1.557448718  | 0.12484223  | 2.31475511   | 0.024300984 |
| ALDH6A1     | 0.632136521  | 0.528951822 | 2.459293751  | 0.016946572 | 1.756713631  | 0.084410218 |
| ALDH7A1     | 1.566277614  | 0.120906046 | 1.747356981  | 0.085905336 | 1.946527997  | 0.056593237 |
| ALDH8A1     | 0.423699813  | 0.672828194 | 0.478555094  | 0.63406683  | 1.150751405  | 0.254704083 |
| ALDH9A1     | -2.010741573 | 0.047442452 | 0.365047868  | 0.716412743 | 0.736750361  | 0.464336723 |
| ALDOA       | -2.011361804 | 0.047375626 | 1.219814974  | 0.227506387 | 1.290863069  | 0.202032748 |
| ALDOB       | 0.532242598  | 0.595911719 | 0.135369311  | 0.892791876 | -1.843193986 | 0.070572901 |
| ALDOC       | -0.115701546 | 0.908155146 | 2.31860603   | 0.023987289 | 2.25206575   | 0.028240748 |
| ALG1        | 1.764676572  | 0.08112009  | 2.287548369  | 0.025855236 | 2.406509352  | 0.019415302 |
| ALG10       | -0.241709537 | 0.809572817 | -1.176937668 | 0.244061351 | -1.877591392 | 0.065626649 |
| ALG10B      | 1.378553219  | 0.171559469 | -0.902141142 | 0.370739162 | -1.744031853 | 0.086617561 |
| ALG11       | 0.180756023  | 0.856978584 | -1.97823589  | 0.052692139 | -2.426465765 | 0.018477176 |
| ALG12       | 0.763799922  | 0.44704848  | -1.943017641 | 0.056907176 | -1.271705508 | 0.208711908 |
| ALG13       | 2.145786745  | 0.034669192 | -1.039058885 | 0.303119726 | -1.708642431 | 0.093031538 |
| ALG14       | -0.473097957 | 0.637325586 | -0.599582456 | 0.551136021 | 0.108905479  | 0.913665126 |
| ALG2        | 1.753637142  | 0.083006916 | 0.113032423  | 0.910397902 | -0.368968267 | 0.713536914 |
| ALG3        | -0.104536084 | 0.916984036 | -0.651045545 | 0.517606169 | 0.238918788  | 0.812037102 |
| ALG5        | 0.83304842   | 0.407093629 | -0.253238019 | 0.800986002 | 0.630182953  | 0.531127293 |
| ALG6        | 1.277349042  | 0.204870007 | -0.785537014 | 0.435358388 | -1.491588567 | 0.141395614 |
| ALG8        | 0.314995186  | 0.753517937 | 0.269773052  | 0.788299059 | 1.386874363  | 0.170952953 |
| ALG9        | 0.52443004   | 0.601310251 | -1.59110738  | 0.117059657 | 0.311914612  | 0.75625894  |
| ALKBH1      | 0.488585846  | 0.626361593 | -0.299553024 | 0.765596467 | 0.66435633   | 0.509177251 |
| ALKBH2      | 1.975743089  | 0.051346188 | -1.921263755 | 0.059652023 | -0.207165902 | 0.836628618 |
| ALKBH3      | 1.560443227  | 0.122277753 | 2.055547544  | 0.044369445 | 3.218941618  | 0.002137942 |
| ALKBH4      | -1.739642023 | 0.085450768 | 0.426639775  | 0.671232194 | 1.314895096  | 0.193881999 |
| ALKBH5      | 0.361906911  | 0.718297238 | -0.885714019 | 0.37945467  | -0.847743279 | 0.400174653 |
| ALKBH6      | -0.23404264  | 0.815500559 | -2.147223884 | 0.035997145 | -1.741501133 | 0.087063729 |
| ALKBH7      | 0.773611086  | 0.441253303 | -2.68113636  | 0.009554735 | -1.935859453 | 0.057917649 |
| ALKBH8      | 3.17448652   | 0.002074669 | 0.515841237  | 0.607939896 | 0.66786913   | 0.506948894 |
| ALMS1       | 0.036174995  | 0.971225519 | 0.889140368  | 0.377626203 | 1.558300534  | 0.124772361 |
| ALOX12      | -3.225386843 | 0.001771748 | 0.75301664   | 0.454506869 | -1.224037959 | 0.226041337 |
| ALOX12B     | 0.254741504  | 0.799522645 | -0.290663748 | 0.772352554 | -0.591823373 | 0.556340706 |
| ALOX12P2    | 1.535511704  | 0.12827923  | -0.391162877 | 0.69712015  | 1.066034476  | 0.290963489 |
| ALOX15      | 4.038619194  | 0.000115327 | 0.520810059  | 0.60449565  | 0.473565288  | 0.63764321  |
| ALOX15B     | -0.809198207 | 0.420603905 | 0.33052009   | 0.742206337 | 1.340742336  | 0.185394964 |
| ALOX5       | -1.318058735 | 0.190936429 | -1.055421123 | 0.295639863 | -1.438366964 | 0.155872122 |
| ALOX5AP     | -5.031377542 | 2.59E-06    | -1.328752265 | 0.189170073 | -0.509387339 | 0.61247384  |
| ALPK1       | 0.227413274  | 0.82063481  | -0.122046585 | 0.903286958 | -0.791214619 | 0.432143173 |
| ALPK2       | -0.878611475 | 0.3820269   | 0.145165735  | 0.885086831 | 0.415657935  | 0.679242146 |
| ALPK3       | -0.851408514 | 0.396874859 | 1.761588114  | 0.083445939 | 0.173172855  | 0.863137358 |

|               |              |             |              |             |              |             |
|---------------|--------------|-------------|--------------|-------------|--------------|-------------|
| ALPL          | -0.80972869  | 0.420300522 | -0.833268195 | 0.408135711 | -0.955988876 | 0.343169494 |
| ALS2          | 1.017412721  | 0.311772067 | 1.175148033  | 0.244770741 | 0.226703748  | 0.821476162 |
| ALS2CL        | 1.29181967   | 0.199833435 | 1.135317371  | 0.2609448   | 2.309502578  | 0.024611237 |
| ALS2CR11      | -0.607037838 | 0.545403399 | -0.032794648 | 0.97395173  | -0.53547783  | 0.594430886 |
| ALS2CR12      | -0.493721164 | 0.62274457  | -0.997163177 | 0.322856271 | 0.232666409  | 0.816865161 |
| ALS2CR8       | 1.819354777  | 0.072289759 | -2.12924161  | 0.037521063 | -2.252466558 | 0.028213861 |
| ALX3          | 1.400920965  | 0.164786891 | 0.170976006  | 0.864841867 | 0.72818011   | 0.469524631 |
| AMACR         | -1.393632956 | 0.166970718 | -1.892964198 | 0.063390763 | -2.461193287 | 0.016941367 |
| AMBP          | 0.329934602  | 0.742240778 | -1.490604626 | 0.141521821 | -2.393295031 | 0.020059783 |
| AMBRA1        | -1.429171032 | 0.15652822  | 1.557379345  | 0.124858688 | 1.462181895  | 0.149257487 |
| AMD1          | -2.461043745 | 0.015823952 | -0.227443269 | 0.820884502 | -0.907215982 | 0.368163691 |
| AMDHD1        | 0.657094372  | 0.512851061 | -0.000171976 | 0.999863377 | 0.201420927  | 0.841096241 |
| AMDHD2        | 0.598996102  | 0.550728688 | 0.262671466  | 0.7937411   | 0.24703638   | 0.805779694 |
| AMFR          | -0.685927418 | 0.494578816 | 4.136802421  | 0.000115983 | 4.146217001  | 0.000115156 |
| AMH           | 2.84102012   | 0.005597405 | -2.846689992 | 0.006111248 | -2.281421881 | 0.026330394 |
| AMICA1        | -1.225921472 | 0.223529125 | 1.902058723  | 0.062168155 | 2.016403578  | 0.048543143 |
| AMIGO1        | 1.381943883  | 0.170519414 | 1.358976443  | 0.179452002 | 1.069942621  | 0.289215977 |
| AMIGO2        | 1.342809979  | 0.182818912 | 0.120688899  | 0.904357492 | 0.130877628  | 0.896339181 |
| AMIGO3        | 2.20576759   | 0.030030303 | 0.497112578  | 0.621002009 | 1.388377081  | 0.170497485 |
| AMMECR1       | 1.627742852  | 0.107187984 | -0.970738453 | 0.335737584 | -0.507858553 | 0.61353875  |
| AMMECR1L      | 1.118783704  | 0.266305311 | -0.050255408 | 0.960092736 | 0.409753142  | 0.683543717 |
| AMN           | 1.565859604  | 0.121003914 | -0.992196475 | 0.325251827 | -0.775874481 | 0.441073885 |
| AMN1          | 0.281182942  | 0.779236304 | -0.900636118 | 0.371532314 | -1.047896941 | 0.299168962 |
| AMOT          | -0.610780299 | 0.54293401  | -1.339385646 | 0.185706655 | -0.569844969 | 0.571052357 |
| AMOTL1        | 0.042057999  | 0.966548628 | 1.954186604  | 0.055540293 | 1.562570903  | 0.123763914 |
| AMPD2         | -2.576157534 | 0.011673562 | -1.052629402 | 0.296907024 | -0.763849627 | 0.448149835 |
| AMPD3         | -0.321142946 | 0.748870605 | -0.438193565 | 0.662885078 | -0.938697741 | 0.351900263 |
| AMPH          | 1.087470459  | 0.279826046 | -1.927264238 | 0.058883865 | -1.859666197 | 0.068166367 |
| AMT           | 1.256972117  | 0.212120622 | -0.22364933  | 0.823821556 | 0.747215113  | 0.458046651 |
| AMY2B         | 2.323187668  | 0.022496815 | 0.956136613  | 0.342999299 | 0.651340638  | 0.517479515 |
| AMZ1          | 0.411734679  | 0.681544339 | 0.519307296  | 0.605536375 | -0.136608559 | 0.891828091 |
| AMZ2          | -0.06054193  | 0.95186258  | -2.04593245  | 0.045338372 | -0.236512217 | 0.813894588 |
| AMZ2P1        | 0.843247406  | 0.401397553 | 0.391814954  | 0.696640924 | 0.375633676  | 0.708602453 |
| ANAPC1        | 1.205102526  | 0.231424417 | 0.06800162   | 0.946019867 | 0.552951031  | 0.582488423 |
| ANAPC10       | 0.209568282  | 0.834493539 | -2.241562229 | 0.028858134 | -1.42350324  | 0.16011493  |
| ANAPC11       | -0.596488509 | 0.552394541 | 0.299167292  | 0.765889258 | 0.542572855  | 0.589567772 |
| ANAPC13       | -1.141925401 | 0.256611427 | 0.109305766  | 0.913339914 | -0.933855053 | 0.354371142 |
| ANAPC16       | -0.650636869 | 0.516991863 | -1.430290227 | 0.1580365   | -0.580429476 | 0.563943707 |
| ANAPC2        | 0.727463429  | 0.468891061 | -0.58353779  | 0.561809553 | 0.336674344  | 0.737615574 |
| ANAPC4        | 1.515999702  | 0.13313671  | 1.304847122  | 0.197134326 | 1.09032591   | 0.280219445 |
| ANAPC5        | 0.375499331  | 0.708201131 | 1.732356268  | 0.08856249  | 2.759617014  | 0.007796683 |
| ANAPC7        | 0.703510785  | 0.483611975 | 1.334367431  | 0.187335106 | 2.873294352  | 0.005721821 |
| ANG           | -2.503020697 | 0.014177902 | 1.352580614  | 0.181476054 | 0.883095933  | 0.380943981 |
| ANGEL1        | 2.867067381  | 0.005193607 | -0.550001296 | 0.584445125 | -0.537634945 | 0.592950353 |
| ANGEL2        | 1.392493582  | 0.167314118 | -1.537348222 | 0.129683932 | -2.035958186 | 0.046475202 |
| ANGPT1        | -1.406415864 | 0.163154879 | -1.914803409 | 0.060488571 | -1.805398808 | 0.076366066 |
| ANGPT2        | -1.062762486 | 0.29082441  | 1.629082138  | 0.108753537 | 0.795677789  | 0.42956514  |
| ANGPTL1       | -0.617334237 | 0.538623217 | 1.602148001  | 0.114593664 | 0.574706474  | 0.567781891 |
| ANGPTL6       | 0.914227836  | 0.363118501 | -0.697081148 | 0.488555965 | -2.031067463 | 0.046985136 |
| ANK1          | -2.677071901 | 0.008872789 | 0.680121479  | 0.499152267 | -0.041094377 | 0.967366209 |
| ANK3          | 2.058161266  | 0.04256027  | 0.18161799   | 0.856520182 | -0.287902604 | 0.774479665 |
| ANKAR         | 1.29441956   | 0.198938363 | -0.946380312 | 0.347908239 | -0.862453398 | 0.392101068 |
| ANKDD1A       | -0.800198291 | 0.425770855 | -0.451451154 | 0.653359754 | -0.700506386 | 0.48649931  |
| ANKFY1        | -0.809003705 | 0.420715174 | 1.722054615  | 0.090426366 | 0.432248144  | 0.667214035 |
| ANKH          | 0.483035974  | 0.630280908 | 0.182043768  | 0.856187572 | 0.411302304  | 0.682414142 |
| ANKHD1        | -2.526115066 | 0.013339379 | 0.18080362   | 0.857156428 | 2.114984482  | 0.038875234 |
| ANKHD1-EIF4EI | -1.085859414 | 0.280534294 | 0.2089235    | 0.835245098 | 0.647212829  | 0.520127455 |
| ANKIB1        | 0.815724557  | 0.416880593 | -1.074031286 | 0.28728772  | -2.16616441  | 0.034552761 |
| ANKK1         | 1.452576135  | 0.149930911 | 1.215499727  | 0.229134386 | 1.943867042  | 0.056921126 |
| ANKLE1        | -0.056093224 | 0.955395886 | 0.828236658  | 0.410955365 | 1.131813821  | 0.262515864 |
| ANKLE2        | 2.754722312  | 0.007149827 | 2.496032371  | 0.015444707 | 3.27446646   | 0.001814634 |
| ANKMY1        | 0.694950957  | 0.488933953 | -1.175996764 | 0.244434129 | -1.466193891 | 0.148165116 |
| ANKMY2        | 2.22178416   | 0.02888731  | 0.781749708  | 0.437563542 | 0.404325472  | 0.687507039 |
| ANKRA2        | 0.463559569  | 0.64411849  | -1.217000217 | 0.228567339 | -1.940933481 | 0.057284487 |
| ANKRD10       | 3.058346288  | 0.002955693 | 1.46524665   | 0.148291476 | 1.393113069  | 0.169068135 |
| ANKRD11       | 1.131814952  | 0.260815529 | -1.703846389 | 0.093799934 | -1.641500967 | 0.106274881 |
| ANKRD12       | 0.603994968  | 0.547415347 | -0.339415404 | 0.735531333 | -1.32869626  | 0.189314579 |
| ANKRD13A      | -2.752995108 | 0.007184569 | -0.599703483 | 0.5510559   | -0.454052572 | 0.651538559 |
| ANKRD13B      | -0.199235111 | 0.842542731 | -2.95828488  | 0.004481801 | -1.690052143 | 0.096554672 |
| ANKRD13C      | 1.354163742  | 0.179183518 | 0.07170789   | 0.9430828   | -0.947299402 | 0.34753914  |
| ANKRD13D      | -1.527228028 | 0.130324043 | -1.007114958 | 0.318091912 | -1.076990746 | 0.286082817 |
| ANKRD16       | 1.988952207  | 0.049841828 | -1.557722775 | 0.12477723  | -0.281333047 | 0.779487551 |

|            |              |             |              |             |              |             |
|------------|--------------|-------------|--------------|-------------|--------------|-------------|
| ANKRD17    | -0.042013629 | 0.966583897 | 0.108544705  | 0.913940885 | -0.26673648  | 0.790647727 |
| ANKRD18A   | 0.656573506  | 0.513184407 | -0.335960079 | 0.738121793 | 0.403188061  | 0.688338708 |
| ANKRD19P   | -0.925622376 | 0.35719721  | -0.463868942 | 0.644490046 | -1.967525642 | 0.054062035 |
| ANKRD20A5P | -0.587667111 | 0.558274717 | 0.734872693  | 0.46539869  | -0.347303137 | 0.729660024 |
| ANKRD20A9P | 0.331287499  | 0.741222264 | 1.237807476  | 0.220809586 | 1.250861105  | 0.216164318 |
| ANKRD22    | -2.422714052 | 0.017474167 | -0.083895855 | 0.933430153 | -1.052663576 | 0.296997313 |
| ANKRD23    | 2.265272228  | 0.025973924 | -1.193229198 | 0.237671658 | -1.101032828 | 0.275572762 |
| ANKRD24    | 1.248238186  | 0.215285474 | -0.785331903 | 0.435477645 | 0.346619929  | 0.730170512 |
| ANKRD26    | 1.243548738  | 0.216998971 | -0.132370889 | 0.895152295 | -1.545330384 | 0.127875642 |
| ANKRD27    | 1.420602177  | 0.158998811 | 2.855643516  | 0.005962761 | 2.363024393  | 0.021608906 |
| ANKRD28    | 1.1542781    | 0.251540219 | -0.484608845 | 0.629791727 | -1.121194284 | 0.266970076 |
| ANKRD31    | -0.572632163 | 0.568367527 | 1.647721396  | 0.104855226 | 0.95109279   | 0.345627121 |
| ANKRD32    | 0.047531626  | 0.962198232 | -1.398465308 | 0.167334836 | -1.429871546 | 0.158286262 |
| ANKRD33B   | -1.376121578 | 0.172308323 | 0.744287087  | 0.459728731 | -1.221443283 | 0.22701404  |
| ANKRD34A   | 1.819116977  | 0.072326356 | -2.823592426 | 0.006510794 | -1.826340913 | 0.073108734 |
| ANKRD34B   | 0.290177516  | 0.772369461 | 0.421456222  | 0.674990737 | -0.129918572 | 0.89709444  |
| ANKRD35    | -0.201030594 | 0.841142883 | 1.443954683  | 0.154169485 | 1.597827208  | 0.115685692 |
| ANKRD36    | 1.363777254  | 0.176148318 | 0.489543096  | 0.626316585 | 0.407316834  | 0.685321627 |
| ANKRD36B   | 0.546748899  | 0.58594784  | -0.685058107 | 0.496055079 | -1.186093636 | 0.240572417 |
| ANKRD36BP1 | -0.300612552 | 0.764425605 | -0.853999502 | 0.396643267 | -1.076614158 | 0.286249627 |
| ANKRD36BP2 | 1.316136164  | 0.191578085 | 1.080635461  | 0.28436346  | 0.772279721  | 0.443182283 |
| ANKRD37    | 1.62396609   | 0.107993087 | -0.532050695 | 0.596737314 | -0.48376443  | 0.630431519 |
| ANKRD39    | 1.95660779   | 0.053593936 | -2.250830787 | 0.028229207 | -1.463207119 | 0.148977745 |
| ANKRD40    | 2.622529751  | 0.010300015 | -0.170069688 | 0.865551304 | 1.137731572  | 0.260056736 |
| ANKRD42    | 1.318526967  | 0.190780401 | -1.517615121 | 0.134581515 | 0.299963737  | 0.765310803 |
| ANKRD44    | 0.982668445  | 0.328489638 | -0.789856948 | 0.432851163 | -2.047832801 | 0.045256954 |
| ANKRD46    | 0.981184035  | 0.329216817 | -0.540815381 | 0.590720349 | -0.321753122 | 0.74883266  |
| ANKRD49    | 0.477643418  | 0.634099295 | -1.354623994 | 0.180827515 | -1.499756345 | 0.139270946 |
| ANKRD5     | 1.575796067  | 0.118694509 | -0.15123997  | 0.880314894 | 0.98155767   | 0.330521842 |
| ANKRD50    | 0.123771371  | 0.901781189 | 0.761902589  | 0.449226853 | 0.300547691  | 0.764867725 |
| ANKRD52    | 2.452736802  | 0.016169271 | -1.227487981 | 0.224632543 | -0.091811778 | 0.927173856 |
| ANKRD54    | -0.964084851 | 0.33766976  | 1.49276056   | 0.140957688 | 1.221327697  | 0.227057442 |
| ANKRD55    | 1.957420287  | 0.053496823 | -0.066705539 | 0.947047138 | -0.117370429 | 0.906984703 |
| ANKRD57    | 0.371810555  | 0.710935996 | 0.213191593  | 0.831930342 | -0.752782279 | 0.454720482 |
| ANKRD58    | -1.805123646 | 0.074507237 | -2.71490536  | 0.008733723 | -2.771938411 | 0.007542242 |
| ANKRD6     | 0.631221799  | 0.52954686  | 0.086389754  | 0.93145622  | -0.038669789 | 0.969290611 |
| ANKRD9     | -2.318245667 | 0.022776576 | -0.679538604 | 0.499518651 | -2.068003883 | 0.043250861 |
| ANKS1A     | -1.341309038 | 0.183303635 | 1.149265457  | 0.25519665  | 0.603607121  | 0.548531932 |
| ANKS3      | 1.864254378  | 0.065651021 | 0.679657358  | 0.499443993 | 1.689967417  | 0.096570976 |
| ANKS6      | 2.585527698  | 0.011383369 | 1.016290548  | 0.313741237 | 2.057006054  | 0.044334862 |
| ANKUB1     | -2.227058083 | 0.028519376 | -2.141901065 | 0.036442488 | -2.413458492 | 0.019083889 |
| ANKZF1     | 1.060976653  | 0.291630656 | 1.267222452  | 0.210175623 | 2.649682666  | 0.010441632 |
| ANLN       | -0.260912025 | 0.794775623 | 1.393505987  | 0.168821053 | 0.464538428  | 0.644055541 |
| ANO10      | -2.197858912 | 0.030609135 | 1.62765534   | 0.109056731 | 2.82154981   | 0.006593219 |
| ANO5       | 2.189346546  | 0.031243019 | -0.072045099 | 0.942815614 | -0.333144252 | 0.748324621 |
| ANO6       | -2.059091347 | 0.042469002 | -0.128936032 | 0.897857455 | -1.207821723 | 0.232170845 |
| ANO8       | 2.169286326  | 0.032782322 | -3.524447626 | 0.00083913  | -2.374884295 | 0.020989655 |
| ANO9       | -0.006578977 | 0.994765807 | 0.591534705  | 0.556476891 | 1.354117049  | 0.181115573 |
| ANP32A     | -1.965255233 | 0.052568003 | 0.494334743  | 0.622950006 | 0.478763012  | 0.633963502 |
| ANP32B     | 0.151032433  | 0.880299021 | 3.416007683  | 0.00117111  | 3.884374933  | 0.000272536 |
| ANP32E     | 0.789868162  | 0.431747707 | 0.428774419  | 0.669686828 | 0.47511778   | 0.636543163 |
| ANPEP      | -1.970674889 | 0.051933573 | -0.057336397 | 0.95447568  | -0.010459662 | 0.991691567 |
| ANTXR2     | -2.967486996 | 0.003874869 | 0.251823989  | 0.802073512 | -0.723425483 | 0.472416926 |
| ANUBL1     | 0.031385414  | 0.975033908 | -1.144087333 | 0.257319977 | -2.474069522 | 0.01640181  |
| ANXA1      | -0.179020837 | 0.858336693 | -0.018535341 | 0.985275845 | -0.13142319  | 0.895909592 |
| ANXA11     | -2.270418162 | 0.025646885 | 0.823484588  | 0.413629278 | 0.883017419  | 0.380986035 |
| ANXA2      | -0.237212391 | 0.813048509 | 1.859912532  | 0.068007023 | 1.790131152  | 0.078816662 |
| ANXA3      | 0.525245605  | 0.600745641 | -0.645603425 | 0.52110001  | -0.979518242 | 0.331519138 |
| ANXA4      | -0.580118302 | 0.563331069 | 0.451578816  | 0.653268309 | -0.075847123 | 0.398090908 |
| ANXA5      | -1.74895304  | 0.083818368 | 1.761209333  | 0.083510634 | 0.912283476  | 0.365513854 |
| ANXA6      | -1.071777053 | 0.286777921 | 2.12636189   | 0.03777027  | 2.396341701  | 0.019909515 |
| ANXA7      | -1.099858656 | 0.274421241 | 1.929593531  | 0.058587957 | 1.853454949  | 0.069065548 |
| ANXA9      | -2.553346646 | 0.012408113 | 0.946237455  | 0.347980458 | 1.933103184  | 0.058264086 |
| AOAH       | -2.408023732 | 0.018146251 | 1.094893422  | 0.278120857 | 0.491404836  | 0.625052617 |
| AOC2       | -2.187265325 | 0.031399732 | -1.935381514 | 0.057858146 | -1.693208172 | 0.095948947 |
| AOC3       | -2.650343882 | 0.009548085 | -1.578475584 | 0.119933302 | -1.186188575 | 0.240535235 |
| AOC4       | -0.508670791 | 0.61226776  | 0.865880047  | 0.390148507 | 0.658479391  | 0.512917058 |
| AP1AR      | 1.402235637  | 0.164395293 | -0.481337003 | 0.632100703 | -1.387232735 | 0.170844247 |
| AP1B1      | -1.19111409  | 0.236841317 | 2.602957417  | 0.011733094 | 2.232585416  | 0.029575177 |
| AP1G1      | 0.056757777  | 0.954868019 | 0.326615609  | 0.745142573 | 0.753593109  | 0.454237211 |
| AP1G2      | -0.062811154 | 0.950060656 | 0.794187299  | 0.430346519 | 2.090554277  | 0.041099904 |
| AP1M1      | -1.194932648 | 0.235353646 | 1.223815443  | 0.226004715 | 1.220284023  | 0.227449617 |



|          |              |             |              |             |              |             |
|----------|--------------|-------------|--------------|-------------|--------------|-------------|
| AP1M2    | -3.444528665 | 0.000881599 | 1.361439032  | 0.178677289 | 1.022193934  | 0.311066336 |
| AP1S1    | 0.302148769  | 0.763258237 | -1.067168958 | 0.290348282 | -0.691528536 | 0.492078539 |
| AP1S2    | -0.256559842 | 0.798122994 | 0.212447043  | 0.832508367 | -0.07249344  | 0.942466443 |
| AP1S3    | -0.430357033 | 0.66799786  | -1.640399759 | 0.10637272  | 0.456765373  | 0.649599125 |
| AP2A1    | -1.813421093 | 0.073207567 | 0.021922618  | 0.982585455 | -0.489443801 | 0.626431261 |
| AP2A2    | 0.376206788  | 0.707677057 | 1.313141307  | 0.19434296  | 1.909777221  | 0.061267335 |
| AP2B1    | -1.39323512  | 0.167090562 | 1.243408448  | 0.2187548   | 1.885341277  | 0.064553668 |
| AP2M1    | -2.344586543 | 0.021320211 | 1.523268427  | 0.133163643 | 1.708387026  | 0.093079214 |
| AP2S1    | -1.432633564 | 0.155538337 | 0.25452294   | 0.799998132 | 0.575978856  | 0.566927447 |
| AP3B1    | -0.175292499 | 0.861256255 | 1.284310286  | 0.204175344 | 1.046404572  | 0.299851107 |
| AP3B2    | -0.911430866 | 0.364581476 | 1.950006445  | 0.056048548 | 1.470189945  | 0.14708333  |
| AP3D1    | -0.264456363 | 0.792052421 | 0.144075783  | 0.885943559 | 0.549145732  | 0.585079429 |
| AP3M1    | 0.021664135  | 0.982765376 | -1.957073585 | 0.055191578 | -1.877804853 | 0.065596894 |
| AP3M2    | 2.217271433  | 0.029205433 | 2.237426506  | 0.029142739 | 1.85472922   | 0.068880265 |
| AP3S1    | -0.698043762 | 0.48700734  | -0.044316544 | 0.964805372 | -0.504974417 | 0.615555004 |
| AP3S2    | -1.29871318  | 0.197466716 | -2.194061991 | 0.032279391 | -1.785458174 | 0.079579722 |
| AP4B1    | 0.631396084  | 0.529433458 | 1.512619966  | 0.135844262 | 2.314551163  | 0.024312965 |
| AP4E1    | -0.676169389 | 0.500722829 | 0.218369258  | 0.827913298 | -0.13902153  | 0.889929791 |
| AP4M1    | 0.003084434  | 0.997546028 | 1.145515396  | 0.256733137 | 1.574893344  | 0.120890555 |
| AP4S1    | 2.183596011  | 0.031677697 | -1.271202004 | 0.208766661 | -0.666220321 | 0.507994167 |
| APAF1    | -1.481368778 | 0.142113367 | -1.264804013 | 0.211035316 | -1.313579751 | 0.194321605 |
| APBA1    | 2.191917051  | 0.031050406 | 0.289216916  | 0.773453879 | 1.092766728  | 0.279155376 |
| APBA2    | 2.781593728  | 0.006628711 | -0.938795631 | 0.351756034 | 0.169280946  | 0.866183106 |
| APBA3    | -0.431215631 | 0.667375891 | -2.083536362 | 0.041650374 | -2.066855006 | 0.043363014 |
| APBB1    | 1.40418623   | 0.16381559  | 1.926326591  | 0.05900334  | 3.038635451  | 0.00360151  |
| APBB1IP  | -1.831226985 | 0.070482158 | 0.083011051  | 0.934130581 | -0.12716548  | 0.899263037 |
| APBB2    | 0.224249696  | 0.823087682 | 0.567271926  | 0.572733883 | 0.443662983  | 0.658988598 |
| APBB3    | 1.131403366  | 0.260987695 | 0.322248016  | 0.748431584 | 0.913814183  | 0.364715844 |
| APC      | -1.03472127  | 0.303660528 | -0.742165721 | 0.461002882 | -2.098321424 | 0.040380891 |
| APC2     | 0.91574642   | 0.362325763 | -1.230925458 | 0.223353741 | -0.639682752 | 0.524976324 |
| APCDD1   | 1.836069928  | 0.069755705 | 1.258873365  | 0.213154551 | 0.601967709  | 0.54961499  |
| APEH     | -0.427159568 | 0.670316141 | 2.416668585  | 0.018852948 | 2.224223505  | 0.030164858 |
| APEX1    | 0.577174216  | 0.565309152 | -1.723933965 | 0.09008394  | -0.510831712 | 0.611468501 |
| APEX2    | -0.235312202 | 0.814518231 | 2.423484148  | 0.018535746 | 3.122996125  | 0.002827701 |
| APH1A    | -1.385589667 | 0.169406471 | 0.464758126  | 0.643856893 | 0.573180335  | 0.568807574 |
| APH1B    | 0.276909078  | 0.782505345 | -0.414215999 | 0.680254488 | -0.332694865 | 0.740601671 |
| API5     | 1.621296432  | 0.108565117 | -0.136185376 | 0.89214962  | 0.028906504  | 0.977041498 |
| APIP     | 1.502522934  | 0.136575474 | -0.861325895 | 0.392630255 | 0.467301819  | 0.642089615 |
| APITD1   | 0.18881522   | 0.850676455 | -0.687400608 | 0.494589107 | 0.185744392  | 0.853313559 |
| APLF     | 1.198199251  | 0.23408636  | 0.284507206  | 0.777042128 | -1.025624497 | 0.309460116 |
| APLP2    | -2.533351247 | 0.013085973 | 2.479448644  | 0.016107103 | 1.984749213  | 0.05205881  |
| APOA1BP  | -0.173887163 | 0.86235724  | 0.871925768  | 0.386869096 | 1.429778429  | 0.158312883 |
| APOBEC2  | 0.22990518   | 0.818703971 | -1.197526894 | 0.236006452 | -0.481352733 | 0.632133575 |
| APOBEC3A | -2.892356774 | 0.00482734  | 1.059940464  | 0.293596423 | -2.818594873 | 0.006646503 |
| APOBEC3B | -1.633949386 | 0.105875433 | -0.173265884 | 0.863049925 | -1.066428148 | 0.290787131 |
| APOBEC3C | -0.822098004 | 0.413263663 | -1.545596218 | 0.127679393 | -0.934968832 | 0.353801866 |
| APOBEC3D | 1.199008766  | 0.233773069 | 0.061485348  | 0.951185548 | 1.780212059  | 0.080443708 |
| APOBEC3F | -0.793940987 | 0.429385349 | 0.256691406  | 0.79833172  | 1.232028869  | 0.223064867 |
| APOBEC3G | -1.833897108 | 0.070080856 | -4.171315871 | 0.000103283 | -3.447521017 | 0.001078045 |
| APOBEC3H | 0.888392489  | 0.376774021 | -3.424457213 | 0.001141314 | -2.260186912 | 0.027700357 |
| APOBR    | -2.19445386  | 0.030861335 | 0.796001253  | 0.429299912 | 0.632862533  | 0.529388513 |
| APOD     | 0.976213991  | 0.331659245 | -0.178414358 | 0.859023642 | 0.045105754  | 0.964182802 |
| APOL1    | -2.474778035 | 0.015267472 | 1.508406803  | 0.136916609 | 0.255935293  | 0.798934665 |
| APOL2    | -2.069423249 | 0.041466418 | 0.866073724  | 0.390043181 | 0.371319545  | 0.711794824 |
| APOL3    | -0.878239373 | 0.382227634 | 0.616222356  | 0.540175669 | 0.9749061    | 0.333781871 |
| APOL4    | -1.373513049 | 0.173114414 | -0.620804383 | 0.537177348 | -1.259642119 | 0.213001234 |
| APOL6    | -0.600632612 | 0.549642874 | -0.475361022 | 0.636327527 | -2.609220696 | 0.011605832 |
| APOLD1   | 0.150949597  | 0.88036417  | -1.937456332 | 0.057598426 | -0.739519221 | 0.462667651 |
| APOM     | 0.088838378  | 0.929414101 | 0.322268475  | 0.748416166 | 1.128127112  | 0.264056192 |
| APOO     | 0.541112243  | 0.58981012  | -0.164472514 | 0.869935033 | -0.694391962 | 0.490295261 |
| APOOL    | 0.11351602   | 0.909882439 | -1.002013883 | 0.320528087 | 0.701997634  | 0.485575995 |
| APP      | -0.28066789  | 0.779630054 | 2.19215023   | 0.032424262 | 1.31303615   | 0.194503503 |
| APPBP2   | 0.778232419  | 0.438538849 | -1.540137056 | 0.129003364 | -2.510610384 | 0.014954015 |
| APPL1    | 1.068499404  | 0.288244706 | -0.499776561 | 0.61913641  | -1.270038141 | 0.20930091  |
| APPL2    | 0.984985229  | 0.327356818 | -0.263179153 | 0.793351708 | -0.874287623 | 0.385680095 |
| APRT     | 0.183570828  | 0.854776387 | 1.119891473  | 0.267408302 | 1.504884768  | 0.13794985  |
| APTX     | 1.26710145   | 0.208493113 | 1.124300977  | 0.26554928  | 1.8881771    | 0.064164777 |
| AQP1     | -1.115700051 | 0.26761614  | 2.114349444  | 0.038825457 | 1.821122326  | 0.073909317 |
| AQP10    | -5.11468607  | 1.85E-06    | 0.779502646  | 0.438875003 | 0.423933509  | 0.673231522 |
| AQP11    | 0.76714462   | 0.44506793  | -0.753465482 | 0.45423931  | -0.291129149 | 0.772023621 |
| AQP3     | 1.197589386  | 0.234322584 | 1.106291789  | 0.273199609 | 1.235545848  | 0.221764021 |
| AQP9     | -2.164945945 | 0.03312394  | -0.219745296 | 0.826846483 | -0.943619309 | 0.349400643 |

|              |              |             |              |             |              |              |
|--------------|--------------|-------------|--------------|-------------|--------------|--------------|
| AQR          | 0.796927855  | 0.427657745 | 0.434426877  | 0.665601696 | 0.352301203  | 0.725929263  |
| ARAF         | -1.026912709 | 0.307302135 | 0.478511365  | 0.634097757 | 1.134421173  | 0.261430351  |
| ARAP1        | -1.977572437 | 0.051135567 | 0.605458973  | 0.547252493 | 0.028621539  | 0.977267764  |
| ARAP2        | 1.003504605  | 0.318394387 | -1.062553545 | 0.292419353 | -1.975061594 | 0.053177561  |
| ARAP3        | -1.50798798  | 0.135172687 | -0.008064893 | 0.993593086 | 0.166991329  | 0.867975882  |
| ARCN1        | -1.145758095 | 0.255030305 | 0.789352852  | 0.433143291 | 0.791605021  | 0.431917301  |
| ARF1         | -2.409615591 | 0.018072327 | -0.293133187 | 0.770473912 | -0.592247128 | 0.556058932  |
| ARF3         | -2.59223332  | 0.011179713 | -0.083877983 | 0.9334443   | 0.072135765  | 0.942749806  |
| ARF4         | -1.332606682 | 0.186133137 | -1.37406278  | 0.174745988 | -1.080607078 | 0.284484394  |
| ARF5         | -1.916916295 | 0.058523694 | -0.916236    | 0.363363554 | -0.892299165 | 0.376034877  |
| ARF6         | -1.337141372 | 0.184654648 | 0.048295677  | 0.961647681 | -0.465464873 | 0.643396165  |
| ARFGAP1      | -0.309595605 | 0.757607203 | 0.848996958  | 0.399397938 | 1.65979521   | 0.102522575  |
| ARFGAP2      | -0.748624385 | 0.456098425 | 2.498237565  | 0.015358504 | 3.322460245  | 0.001572905  |
| ARFGAP3      | -0.344480896 | 0.731068373 | 1.089144018  | 0.280626523 | 0.243551048  | 0.808464808  |
| ARFGF1       | 0.545732227  | 0.586643588 | 1.197157152  | 0.23614938  | 0.348097654  | 0.729066522  |
| ARFGF2       | 1.915341255  | 0.058726973 | 0.35708831   | 0.722330738 | -0.488216669 | 0.62729464   |
| ARFIP1       | -1.169955105 | 0.245207221 | 0.296437407  | 0.767962367 | -0.896710643 | 0.373696028  |
| ARFIP2       | -0.655661629 | 0.513768271 | 0.278077927  | 0.781948364 | 2.046685301  | 0.04537346   |
| ARFRP1       | -0.706232781 | 0.481926329 | 1.697633246  | 0.094974529 | 2.566238272  | 0.012971043  |
| ARG1         | -3.187098244 | 0.001995406 | -1.186969758 | 0.24011218  | -0.818130177 | 0.416735975  |
| ARG2         | -1.398810646 | 0.165416979 | -0.832148018 | 0.408762428 | -0.840558132 | 0.404155228  |
| ARGFXP2      | -0.130747012 | 0.896276645 | 0.667373308  | 0.507198865 | 1.601694645  | 0.114826059  |
| ARGLU1       | 1.103955145  | 0.272650062 | -0.513655089 | 0.609458111 | -1.245954705 | 0.217946748  |
| ARHGAP1      | -1.898138373 | 0.060986315 | 0.312976204  | 0.755429234 | 0.9565083    | 0.34290944   |
| ARHGAP10     | 1.387994784  | 0.168675304 | 0.125465382  | 0.900592043 | 1.01472511   | 0.314582807  |
| ARHGAP11A    | -0.128122582 | 0.898347026 | 0.490361394  | 0.625741085 | 0.644266743  | 0.522021711  |
| ARHGAP11B    | 1.479997321  | 0.142478367 | -2.023933303 | 0.047624327 | -1.164690218 | 0.249061344  |
| ARHGAP12     | 0.284348993  | 0.776817175 | -0.764340151 | 0.447784722 | -1.133172152 | 0.261949955  |
| ARHGAP15     | -0.019598663 | 0.984408312 | 1.00325519   | 0.319934114 | 1.427024547  | 0.159101765  |
| ARHGAP17     | 1.273693606  | 0.206157031 | 1.306943188  | 0.196426077 | 1.423972601  | 0.159979595  |
| ARHGAP18     | -0.722275381 | 0.472057998 | 1.240371023  | 0.219867361 | -0.248663807 | 0.804526721  |
| ARHGAP19     | -2.330169125 | 0.022106781 | 0.466706323  | 0.642470585 | 0.864882552  | 0.390777663  |
| ARHGAP21     | -2.294662976 | 0.024154332 | 1.011065035  | 0.316214004 | 0.011671148  | 0.990729288  |
| ARHGAP22     | 1.194968383  | 0.235339756 | 0.73322052   | 0.466397835 | 1.128957748  | 0.26370859   |
| ARHGAP23     | -1.09517816  | 0.276454692 | 0.358772399  | 0.721077167 | -0.032570119 | 0.974132722  |
| ARHGAP24     | -0.255365904 | 0.799041944 | 2.029209757  | 0.047067166 | 0.894595593  | 0.374816215  |
| ARHGAP25     | -2.267480785 | 0.025833117 | 1.176735727  | 0.244141324 | 1.129967125  | 0.263286626  |
| ARHGAP26     | -1.820813068 | 0.072065668 | 0.310911017  | 0.75699071  | 0.019584516  | 0.984444137  |
| ARHGAP27     | -0.5583266   | 0.578052376 | -1.84448676  | 0.070256783 | -2.389085466 | 0.9020269079 |
| ARHGAP29     | -1.221317746 | 0.225257924 | 0.756734792  | 0.452293195 | 0.023241336  | 0.081540037  |
| ARHGAP30     | -2.073965779 | 0.041032114 | 1.481693052  | 0.143872576 | 1.800609673  | 0.077127805  |
| ARHGAP31     | -0.847507679 | 0.399032696 | 0.547124135  | 0.58640719  | 0.853219671  | 0.397157039  |
| ARHGAP32     | 1.65489368   | 0.101541616 | 0.256679307  | 0.798341015 | 0.962067669  | 0.340134193  |
| ARHGAP33     | 1.370844739  | 0.173941942 | -1.374002525 | 0.174764594 | -0.096338403 | 0.923594311  |
| ARHGAP35     | 0.75471728   | 0.452452386 | 0.422887706  | 0.673951945 | 0.631715678  | 0.530132343  |
| ARHGAP39     | -0.337101132 | 0.736850797 | -2.26729694  | 0.027141724 | -2.332573562 | 0.02327427   |
| ARHGAP4      | -0.043025815 | 0.965779337 | 0.295649262  | 0.768561212 | 0.920993184  | 0.360988116  |
| ARHGAP42     | 0.1241783    | 0.901459943 | 1.631136641  | 0.108318159 | 0.89967773   | 0.372128168  |
| ARHGAP44     | -0.946364701 | 0.346578039 | -0.619301794 | 0.538159645 | -1.168242643 | 0.247637702  |
| ARHGAP5      | 0.829470123  | 0.409103654 | 0.146474934  | 0.884057953 | -1.065758196 | 0.291087302  |
| ARHGAP6      | -2.538127051 | 0.012921109 | 1.520829033  | 0.133773991 | -0.02724218  | 0.978363017  |
| ARHGAP9      | -2.382107168 | 0.019388251 | -0.942019666 | 0.350117077 | -0.983876265 | 0.329390455  |
| ARHGDIA      | -0.990915653 | 0.324468833 | -0.605885683 | 0.546971042 | -0.577954705 | 0.565601859  |
| ARHGDIB      | -2.569430865 | 0.011885985 | -1.322697857 | 0.191163778 | -1.147188221 | 0.256161082  |
| ARHGFE1      | -0.116879675 | 0.907224214 | 0.639800251  | 0.52483933  | 1.490879839  | 0.141581174  |
| ARHGFE10     | 1.737537474  | 0.085823336 | -0.496062064 | 0.621738378 | -1.216062915 | 0.229040813  |
| ARHGFE10L    | 1.168649773  | 0.24573015  | 1.597654723  | 0.115592157 | 1.351966688  | 0.181798481  |
| ARHGFE11     | -1.481482948 | 0.142083015 | 0.511809297  | 0.610741305 | 0.317416332  | 0.752103245  |
| ARHGFE12     | -3.853688827 | 0.000221864 | 0.302835194  | 0.763106517 | 0.312249867  | 0.756005499  |
| ARHGFE17     | -0.342347544 | 0.732913261 | -0.051599561 | 0.959026309 | -0.392294663 | 0.696323378  |
| ARHGFE18     | 0.415851663  | 0.678540317 | 0.277423035  | 0.782448622 | 0.691267812  | 0.49224109   |
| ARHGFE19     | -1.681516924 | 0.096241342 | 2.191673851  | 0.03246045  | 0.605855558  | 0.54704829   |
| ARHGFE2      | -0.928337785 | 0.355795297 | -0.362972886 | 0.717953843 | -0.065097652 | 0.94832711   |
| ARHGFE25     | 1.129540466  | 0.261767941 | -0.99639448  | 0.323226258 | -0.905091023 | 0.369278496  |
| ARHGFE26     | -0.755613908 | 0.451917254 | 2.131596719  | 0.037318324 | 2.782354991  | 0.007333122  |
| ARHGFE26-AS1 | -1.228199839 | 0.222677128 | 2.455499006  | 0.017108964 | 1.991353719  | 0.051307745  |
| ARHGFE3      | 0.335593116  | 0.7379839   | 1.255346909  | 0.214422133 | 0.839794271  | 0.404579833  |
| ARHGFE35     | -1.308830877 | 0.194030935 | -1.136727519 | 0.260359522 | -1.893791713 | 0.063400674  |
| ARHGFE37     | -2.893507438 | 0.004811255 | 1.694304947  | 0.095608702 | 0.944234122  | 0.349089201  |
| ARHGFE4      | 0.223676102  | 0.823532606 | -1.19800043  | 0.235823493 | -0.281283839 | 0.779525098  |
| ARHGFE40     | -1.969649461 | 0.052053109 | -0.009758937 | 0.992247343 | -1.564513746 | 0.123307278  |
| ARHGFE5      | 1.444245869  | 0.152253832 | 1.951660925  | 0.055846911 | 2.137026777  | 0.036958895  |

|         |              |             |              |             |              |             |
|---------|--------------|-------------|--------------|-------------|--------------|-------------|
| ARHGFE6 | 0.837055926  | 0.404849633 | -0.157058726 | 0.875747839 | 0.287920439  | 0.774466083 |
| ARHGFE7 | 0.256642885  | 0.798059088 | 0.203976631  | 0.839090775 | 0.605692482  | 0.547155828 |
| ARHGFE9 | 2.37429743   | 0.019777053 | -0.90739985  | 0.367976281 | 0.471441231  | 0.639149578 |
| ARID1A  | -0.798867936 | 0.426537811 | -0.848209922 | 0.399832396 | -1.100110411 | 0.275970942 |
| ARID1B  | 0.131766578  | 0.895472514 | 0.222479588  | 0.824727617 | -0.356128945 | 0.723076581 |
| ARID2   | -0.04767658  | 0.962083056 | -0.948217959 | 0.346980129 | -1.739608008 | 0.087398732 |
| ARID3A  | -0.818214258 | 0.415465432 | -1.699445138 | 0.094630748 | -1.565421304 | 0.123094434 |
| ARID3B  | -1.35834284  | 0.177859257 | -1.535399104 | 0.130161276 | -1.374169029 | 0.174841356 |
| ARID4A  | 0.139521682  | 0.889359708 | -0.049197912 | 0.960931785 | -1.381828152 | 0.172489285 |
| ARID4B  | 0.255408662  | 0.799009029 | 0.352169818  | 0.725996245 | -1.290998367 | 0.201986153 |
| ARID5A  | -0.364251752 | 0.716551915 | 0.331792681  | 0.741250156 | 0.065819439  | 0.94775501  |
| ARID5B  | 0.960625716  | 0.339396879 | 1.071998519  | 0.288191985 | 0.551194495  | 0.583683754 |
| ARIH1   | -1.145990859 | 0.254934503 | -0.842009939 | 0.403265082 | -1.725445275 | 0.089938956 |
| ARIH2   | 0.793339708  | 0.429733627 | 1.844750354  | 0.07021782  | 2.54402626   | 0.013732298 |
| ARL1    | 0.934018299  | 0.352873993 | -0.769566477 | 0.444701797 | -0.295159902 | 0.76895871  |
| ARL10   | 1.858044292  | 0.066537605 | -0.657021419 | 0.513784036 | -0.737248784 | 0.464036019 |
| ARL11   | -1.825849365 | 0.0712962   | -1.354520214 | 0.180860411 | -2.19912183  | 0.031997785 |
| ARL13B  | 0.377959725  | 0.706379113 | -0.047733398 | 0.962093849 | -1.967279931 | 0.054091084 |
| ARL15   | -0.244617375 | 0.807327475 | -1.116045233 | 0.269037337 | -1.691117106 | 0.096349927 |
| ARL16   | -0.006517629 | 0.994814611 | -0.281528529 | 0.77931406  | 0.387495303  | 0.699852288 |
| ARL17A  | 1.85576475   | 0.066865552 | -0.7784411   | 0.439495362 | -0.6171017   | 0.539658217 |
| ARL2    | -0.308227689 | 0.758644269 | 1.165401169  | 0.24866035  | 1.245303423  | 0.218184163 |
| ARL2BP  | 0.744186562  | 0.458764603 | -0.171798138 | 0.864198426 | 0.442970393  | 0.659486481 |
| ARL3    | -0.495815097 | 0.621272371 | -1.700982381 | 0.094339881 | -0.630284689 | 0.531061221 |
| ARL4A   | -0.374534672 | 0.708915963 | 0.567134594  | 0.572826555 | 0.993544982  | 0.32470029  |
| ARL4C   | 1.70141593   | 0.092428641 | -1.912863985 | 0.060741645 | -1.020216475 | 0.311994761 |
| ARL4D   | 0.150893787  | 0.880408064 | 0.304863093  | 0.761569348 | 0.410294277  | 0.683149064 |
| ARL5A   | 0.279355519  | 0.780633602 | -0.454529827 | 0.651155981 | -1.242225993 | 0.219308577 |
| ARL5B   | -0.030234014 | 0.975949522 | -1.352806099 | 0.181404401 | -3.494108772 | 0.000934752 |
| ARL6    | 1.59778501   | 0.113708876 | -0.145054429 | 0.885174314 | -0.961273444 | 0.340529764 |
| ARL6IP1 | 1.303164942  | 0.195949441 | 1.312865768  | 0.194435211 | 1.259711056  | 0.212976538 |
| ARL6IP4 | 0.84894796   | 0.398235136 | 1.635138794  | 0.10747411  | 2.028811907  | 0.047221937 |
| ARL6IP5 | 1.142921143  | 0.256199984 | 0.373650079  | 0.710036536 | 0.172129303  | 0.863953823 |
| ARL6IP6 | 1.520655812  | 0.131964619 | -2.210113301 | 0.031085331 | -2.619469586 | 0.011300255 |
| ARL8A   | -1.784059335 | 0.077892981 | -2.404415325 | 0.019435499 | -2.930099864 | 0.004888746 |
| ARL8B   | -0.635764689 | 0.52659507  | -0.162688755 | 0.871332949 | -0.317206235 | 0.752261806 |
| ARMC1   | 1.521133876  | 0.131844737 | 0.003176727  | 0.99747632  | -0.172343202 | 0.863786458 |
| ARMC10  | -0.255663978 | 0.798812497 | -0.397746853 | 0.692287165 | -0.580112766 | 0.564155775 |
| ARMC2   | 2.446585155  | 0.01642932  | -3.158108023 | 0.002528321 | -1.625697478 | 0.109605636 |
| ARMC5   | 0.154501193  | 0.877571653 | -0.425812367 | 0.671831577 | 0.219428177  | 0.827111027 |
| ARMC6   | -0.662345976 | 0.509496534 | 2.418319303  | 0.018775679 | 1.747537866  | 0.086002582 |
| ARMC7   | -0.30669492  | 0.759806841 | 0.690566008  | 0.492611936 | 0.297874117  | 0.766896955 |
| ARMC8   | 0.015852893  | 0.987387971 | 1.762487881  | 0.08329243  | 1.787005865  | 0.079326316 |
| ARMCX1  | 2.582809941  | 0.01146686  | 1.34665807   | 0.183365789 | 0.539019758  | 0.592000803 |
| ARMCX2  | 3.307825201  | 0.001367354 | 0.107976636  | 0.914389493 | 0.789564759  | 0.433098496 |
| ARMCX3  | -0.160108412 | 0.873166028 | 3.147340353  | 0.002608951 | 2.182104899  | 0.03329546  |
| ARMCX4  | 3.31583575   | 0.001333058 | -0.421117579 | 0.675236575 | 0.604472927  | 0.547960384 |
| ARMCX5  | 0.703148622  | 0.483836496 | -0.014454229 | 0.988517548 | 1.089962018  | 0.280378325 |
| ARMCX6  | 1.282255742  | 0.203151789 | 0.654571984  | 0.515348856 | 1.668315201  | 0.10081236  |
| ARNT    | -0.844471871 | 0.400716983 | 0.57497119   | 0.567550085 | 0.266653799  | 0.790711072 |
| ARNTL   | -1.829286658 | 0.070774978 | -0.248181189 | 0.804876944 | -1.101676672 | 0.275295071 |
| ARNTL2  | -0.45455833  | 0.650558508 | 0.031992364  | 0.974588747 | 0.111065283  | 0.911960023 |
| ARPC1A  | -1.952820073 | 0.054048637 | 1.274388974  | 0.207643386 | 0.419962847  | 0.676112805 |
| ARPC1B  | -2.198135336 | 0.03058874  | -0.585351993 | 0.56059755  | -1.462477032 | 0.149176914 |
| ARPC2   | -0.563385735 | 0.574618331 | -1.421720516 | 0.160499914 | -1.225175081 | 0.225616012 |
| ARPC3   | -1.023361174 | 0.308968125 | 0.20685773   | 0.836850534 | 0.305660536  | 0.760991725 |
| ARPC4   | -3.0292967   | 0.003224878 | 0.423532558  | 0.673484201 | 0.963108346  | 0.339616332 |
| ARPC5   | -3.881075961 | 0.000201609 | 1.113056231  | 0.270308117 | 0.148663379  | 0.882351066 |
| ARPC5L  | 1.943103365  | 0.055230092 | -1.322535441 | 0.191217479 | 0.201826889  | 0.840780368 |
| ARPP19  | 0.447934801  | 0.6553113   | -1.920759927 | 0.059716908 | -1.505391329 | 0.137819899 |
| ARRB1   | -2.029965378 | 0.045408302 | 0.499534616  | 0.619305742 | 0.987718816  | 0.327521114 |
| ARRB2   | -2.70555442  | 0.008201181 | -2.330758204 | 0.023289725 | -2.834010365 | 0.006372836 |
| ARRDC1  | -0.973386371 | 0.333054127 | -2.672535588 | 0.009774835 | -2.658853721 | 0.010193043 |
| ARRDC2  | 1.521181187  | 0.131832877 | 0.408254574  | 0.684600581 | 0.403672344  | 0.687984556 |
| ARRDC3  | -3.733284558 | 0.000336306 | -0.453473112 | 0.651912047 | -1.789960909 | 0.078844354 |
| ARRDC4  | -1.480231157 | 0.142416083 | 0.722734984  | 0.472767325 | -0.098769272 | 0.921672689 |
| ARRDC5  | 2.132969557  | 0.035737572 | 0.577566733  | 0.565807755 | 2.13521896   | 0.037112896 |
| ARSA    | -0.684083169 | 0.495736872 | 0.210548986  | 0.833982329 | 0.600182564  | 0.550795555 |
| ARSB    | -1.843442053 | 0.068661879 | -0.545468198 | 0.587537868 | -1.1433459   | 0.257738872 |
| ARSD    | -1.515554687 | 0.133249163 | 1.054043361  | 0.296264764 | 0.950313585  | 0.346019308 |
| ARSG    | -0.997022907 | 0.321512424 | -0.742155115 | 0.461009257 | -0.58040309  | 0.563961373 |
| ARSK    | 2.005383726  | 0.048023092 | -0.609263734 | 0.544745527 | -2.131436002 | 0.037436968 |

|           |              |             |              |             |              |              |
|-----------|--------------|-------------|--------------|-------------|--------------|--------------|
| ARV1      | 1.848291369  | 0.067950218 | -0.580225749 | 0.564025555 | -0.577723504 | 0.565756892  |
| ARVCF     | 1.395291011  | 0.166471953 | -0.161130349 | 0.872554596 | -0.20026794  | 0.841993509  |
| ASAH1     | 1.757766441  | 0.082296956 | -2.471796516 | 0.016421302 | -3.052665039 | 0.003460412  |
| ASAP1     | -0.362527248 | 0.717835361 | -0.894677678 | 0.374683027 | -1.288795483 | 0.202745805  |
| ASAP1-IT1 | -0.229546287 | 0.818981989 | 1.696285246  | 0.095230959 | 2.215368911  | 0.030800568  |
| ASAP2     | -2.668259953 | 0.009090474 | -0.424530816 | 0.672760368 | -2.533017946 | 0.014124398  |
| ASAP3     | -1.464721332 | 0.146593578 | 1.579342849  | 0.119734209 | 1.678879485  | 0.098724284  |
| ASB1      | 3.83383466   | 0.000237747 | 1.149241102  | 0.255206608 | 2.471606205  | 0.016503817  |
| ASB13     | 0.360438085  | 0.719391285 | 2.506294006  | 0.015047252 | 3.516217616  | 0.000873271  |
| ASB14     | 1.829845824  | 0.070690488 | -0.299360041 | 0.765742947 | -0.379387834 | 0.705828718  |
| ASB16     | 1.064774162  | 0.289918033 | 0.524366725  | 0.602035801 | 1.201145645  | 0.234729209  |
| ASB2      | 0.431521079  | 0.667154681 | -0.126219905 | 0.899997436 | 0.352221648  | 0.725988594  |
| ASB3      | 1.441428248  | 0.153045811 | -3.708813014 | 0.000470217 | -3.671432781 | 0.000538291  |
| ASB6      | -0.128050826 | 0.898403644 | -0.77738152  | 0.440115087 | 0.046374925  | 0.963175714  |
| ASB7      | 0.39017637   | 0.697357723 | -0.048280997 | 0.961659329 | -0.57951791  | 0.564554197  |
| ASB8      | -1.881652485 | 0.063219787 | -0.471036876 | 0.63939361  | -0.147991309 | 0.882878979  |
| ASB9P1    | -0.075545018 | 0.93995415  | 0.216165432  | 0.829622558 | 0.581329632  | 0.563341179  |
| ASCC1     | -0.143984182 | 0.885845238 | 0.783376499  | 0.436615538 | 1.9820203    | 0.052371889  |
| ASCC2     | -2.818759634 | 0.005965122 | 0.084192881  | 0.933195033 | -0.156292628 | 0.876362084  |
| ASCC3     | 0.203052565  | 0.839567065 | 1.936085964  | 0.057769853 | 1.883541611  | 0.0648015    |
| ASCL2     | -0.484591276 | 0.629181481 | -3.600346601 | 0.000662347 | -4.854311337 | 1.00E-05     |
| ASF1A     | 1.318733633  | 0.190711564 | -1.043058895 | 0.301279335 | -0.637270017 | 0.526534977  |
| ASF1B     | -2.376105172 | 0.019686445 | -1.978621394 | 0.052647524 | -0.649005845 | 0.518976377  |
| ASGR1     | -1.234848096 | 0.220204532 | 1.024096194  | 0.310071903 | 0.041948625  | 0.966688236  |
| ASGR2     | 1.025015776  | 0.308191214 | 1.534936304  | 0.130274823 | 1.785171681  | 0.079626704  |
| ASH1L     | -0.041734148 | 0.966806055 | -0.31273722  | 0.755609876 | -0.288207728 | 0.774247305  |
| ASH2L     | -1.551031354 | 0.1245166   | 0.901371332  | 0.37114472  | 1.133458109  | 0.261830929  |
| ASL       | -1.440736338 | 0.15324078  | -0.172283208 | 0.86381883  | 0.282227176  | 0.778805411  |
| ASMT      | -1.099463182 | 0.274592653 | 1.125004061  | 0.26525371  | 0.804646184  | 0.424412611  |
| ASMTL     | 0.202589309  | 0.839928045 | 0.832965654  | 0.408304919 | 0.992702934  | 0.325106973  |
| ASMTL-AS1 | 0.642648851  | 0.522138362 | 0.448020997  | 0.655818784 | 1.10221089   | 0.275064811  |
| ASNA1     | -1.987787047 | 0.049972997 | -0.268026487 | 0.789636504 | -0.683742309 | 0.496945644  |
| ASNS      | 0.979308529  | 0.3301371   | 1.657150605  | 0.102926943 | 2.734176238  | 0.008347202  |
| ASNSD1    | -0.082866366 | 0.934147749 | -0.802518038 | 0.42555243  | -1.149682314 | 0.255140615  |
| ASPDH     | 1.860433214  | 0.06619537  | -1.098878607 | 0.276393257 | 1.29277851   | 0.201373839  |
| ASPH      | 0.26476635   | 0.791814372 | 1.261134519  | 0.212344707 | -0.390850673 | 0.697384421  |
| ASPHD2    | -1.848358117 | 0.067940465 | 3.601788132  | 0.000659361 | 1.705608374  | 0.093599197  |
| ASPM      | 0.240936744  | 0.810169813 | 1.037093845  | 0.304026637 | 0.310722656  | 0.757160238  |
| ASPRV1    | -3.485245957 | 0.000771872 | -0.089336103 | 0.929124728 | -0.054798017 | 0.956493595  |
| ASPSCR1   | 0.63555838   | 0.526728936 | 1.267488232  | 0.210081304 | 1.195990195  | 0.236718831  |
| ASRGL1    | 0.934378122  | 0.352689468 | 3.040733128  | 0.003548191 | 2.291761632  | 0.025685354  |
| ASTE1     | 0.8499814    | 0.397663468 | -0.155813806 | 0.876724607 | 0.329182233  | 0.743240801  |
| ASTL      | -1.307684166 | 0.194418079 | 0.104963562  | 0.916769404 | 1.297732518  | 0.199677133  |
| ASTN2     | -2.081122379 | 0.040355837 | 2.39416461   | 0.019935186 | 0.341597029  | 0.7339927341 |
| ASXL1     | 3.546977197  | 0.000629807 | 0.544881559  | 0.587938675 | 1.95193183   | 0.055932327  |
| ASXL2     | 0.211883095  | 0.832692762 | -0.18373384  | 0.854867575 | -0.426172665 | 0.671608859  |
| ATAD1     | 1.088634877  | 0.279314914 | -0.303359251 | 0.762709184 | -0.875305795 | 0.385130756  |
| ATAD2     | 2.061631943  | 0.042220554 | -0.54812576  | 0.585723782 | -0.603583363 | 0.54854762   |
| ATAD2B    | 0.462569044  | 0.644825656 | 0.233855567  | 0.815926338 | -1.69271027  | 0.0960443    |
| ATAD3A    | -0.08972047  | 0.928715131 | 2.650907526  | 0.010348951 | 2.927776157  | 0.004920488  |
| ATAD3B    | 0.948513764  | 0.34548962  | 0.607149897  | 0.546137617 | 1.725184508  | 0.089986294  |
| ATAD3C    | 0.107544663  | 0.914603984 | -0.198820144 | 0.843103607 | 0.053346547  | 0.957644849  |
| ATAD5     | 1.944310223  | 0.055082169 | 0.205385655  | 0.837994999 | -0.019848501 | 0.984234483  |
| ATAT1     | 1.350740486  | 0.180273816 | -1.797900873 | 0.077434562 | -0.554378493 | 0.581517892  |
| ATE1      | -0.650185914 | 0.517281689 | -0.217217134 | 0.828806768 | -1.193423254 | 0.237714033  |
| ATF1      | 1.438323343  | 0.153922227 | -0.810483516 | 0.420998591 | -1.850570702 | 0.069495801  |
| ATF2      | 0.789315597  | 0.4320688   | -1.196188488 | 0.236524127 | -3.448365229 | 0.001075272  |
| ATF3      | -2.089386537 | 0.039586882 | -0.835462475 | 0.406909757 | -1.953694711 | 0.055718153  |
| ATF4      | -0.121934697 | 0.903231336 | -0.170614908 | 0.86512451  | 0.098333797  | 0.922016902  |
| ATF5      | -1.023415183 | 0.308942745 | -0.702087217 | 0.485452415 | -0.885665428 | 0.379569334  |
| ATF6      | -0.115584832 | 0.908247377 | -0.730078545 | 0.468301298 | -1.508399394 | 0.137050215  |
| ATF6B     | -0.908385514 | 0.366178623 | 2.377649791  | 0.02076446  | 2.164353309  | 0.034698213  |
| ATF7      | -0.566161407 | 0.572738439 | -1.231920823 | 0.222984447 | -0.89979239  | 0.372067663  |
| ATF7IP    | -0.391176961 | 0.69662074  | 0.14498415   | 0.885229552 | -0.086360893 | 0.931486287  |
| ATF7IP2   | 1.126668177  | 0.262974165 | -0.317802281 | 0.751784271 | 1.264006434  | 0.21144195   |
| ATG10     | -0.388366462 | 0.698691546 | -0.812190116 | 0.420026764 | -0.930944061 | 0.355861815  |
| ATG12     | -0.443814112 | 0.658276468 | -1.22006768  | 0.227411312 | -1.596243981 | 0.116039098  |
| ATG13     | -2.020618349 | 0.046387816 | 1.449818911  | 0.152532718 | 1.989018499  | 0.051572235  |
| ATG14     | 2.215216375  | 0.029351318 | -0.707694912 | 0.481988697 | 0.636055703  | 0.527320354  |
| ATG16L1   | 2.207144807  | 0.029930489 | -0.753689153 | 0.454106012 | 0.604083198  | 0.54821762   |
| ATG16L2   | -1.105652309 | 0.271918603 | -0.159213835 | 0.874057394 | 0.168127743  | 0.86708598   |
| ATG2A     | -4.314402107 | 4.21E-05    | -1.047692019 | 0.299157214 | -0.875543041 | 0.385002824  |

|          |              |             |              |             |              |             |
|----------|--------------|-------------|--------------|-------------|--------------|-------------|
| ATG2B    | 2.197613139  | 0.030627278 | -0.363313226 | 0.71770099  | -0.777297259 | 0.440241031 |
| ATG3     | -0.647768174 | 0.518837017 | 0.197502745  | 0.844129496 | -0.048778097 | 0.961268963 |
| ATG4A    | 0.144517207  | 0.885425602 | -1.196760321 | 0.23630285  | -0.87663569  | 0.384413972 |
| ATG4B    | 0.131709322  | 0.895517669 | 0.039221266  | 0.968849613 | 1.03313433   | 0.305963617 |
| ATG4C    | 0.283095931  | 0.777774357 | 0.776255419  | 0.440774282 | 0.807472768  | 0.422796399 |
| ATG4D    | 1.355981728  | 0.178606526 | -0.998548132 | 0.322190386 | -0.677714393 | 0.500731662 |
| ATG5     | 0.564942633  | 0.573563518 | 0.187642807  | 0.851816156 | 0.237274805  | 0.813305876 |
| ATG7     | -1.522948845 | 0.131390386 | 2.974872665  | 0.004277336 | 2.600024202  | 0.011886418 |
| ATG9A    | -0.886486183 | 0.377794229 | 0.883759596  | 0.380500143 | 1.856950366  | 0.068558306 |
| ATG9B    | 0.973046218  | 0.333222186 | 0.35716104   | 0.722276585 | 0.662748367  | 0.510199024 |
| ATHL1    | -0.491668129 | 0.624189506 | -0.178863531 | 0.85867255  | 0.936531053  | 0.353004382 |
| ATIC     | 0.322795396  | 0.747623026 | 2.555989346  | 0.013250211 | 3.48235432   | 0.000969094 |
| ATL1     | -0.253641602 | 0.800369605 | -0.073930179 | 0.941322104 | -0.762814241 | 0.448762183 |
| ATL2     | 0.909064928  | 0.365821917 | -1.22226762  | 0.226584864 | -1.798889793 | 0.077402909 |
| ATL3     | -0.354140558 | 0.724088568 | 1.007135144  | 0.318082296 | -0.003611114 | 0.997131534 |
| ATM      | 1.655202265  | 0.101478854 | -1.153339727 | 0.253534776 | -1.036359539 | 0.30447028  |
| ATMIN    | -0.529438702 | 0.597846645 | 0.393607332  | 0.695324306 | 0.382027273  | 0.703880984 |
| ATN1     | 1.106934897  | 0.271366729 | -0.896368316 | 0.373787331 | 0.213431045  | 0.831762648 |
| ATOH8    | -2.850249097 | 0.005451147 | 1.15867448   | 0.251370468 | 0.593137294  | 0.555467254 |
| ATOX1    | -2.357056437 | 0.020659993 | -0.943368667 | 0.349432782 | -0.603971286 | 0.548291497 |
| ATP10A   | 4.007675374  | 0.000128834 | 1.043902671  | 0.300892094 | 0.685607602  | 0.49577727  |
| ATP10D   | -0.188066206 | 0.851261767 | -0.12244512  | 0.902972748 | -2.476653423 | 0.016295422 |
| ATP11A   | -0.120952644 | 0.904006853 | -1.518235644 | 0.134425302 | -3.343370209 | 0.001477403 |
| ATP11B   | 0.328228654  | 0.743525738 | -0.601654743 | 0.549764953 | -1.132543229 | 0.262211869 |
| ATP11C   | 0.903692466  | 0.36864859  | -0.483864653 | 0.630316587 | -1.156467018 | 0.252379327 |
| ATP13A1  | 0.826192488  | 0.410950051 | 0.356570675  | 0.722716199 | 0.582807902  | 0.562352377 |
| ATP13A2  | 0.323883834  | 0.746801636 | 0.903203701  | 0.370179839 | 0.910887519  | 0.366242589 |
| ATP13A3  | 1.474977772  | 0.143820518 | -0.522000114 | 0.603672073 | -2.200772313 | 0.031874322 |
| ATP13A4  | 2.145560392  | 0.034687816 | 2.052960283  | 0.044628387 | 1.159824086  | 0.251020979 |
| ATP1A1   | 0.543193576  | 0.588382585 | 2.748585133  | 0.007979779 | 2.990755876  | 0.004124516 |
| ATP1A1OS | 0.991679668  | 0.324098005 | 1.282467093  | 0.204816349 | 0.596668619  | 0.55312316  |
| ATP1A3   | 1.277485974  | 0.204821911 | -0.709308898 | 0.480994345 | 0.276302825  | 0.783328398 |
| ATP1A4   | -1.56629793  | 0.120901291 | 0.028759257  | 0.977156015 | -2.064800456 | 0.043564208 |
| ATP1B1   | 0.578171399  | 0.564638781 | 0.104634646  | 0.917029249 | -0.09823064  | 0.922098442 |
| ATP1B3   | -0.288616194 | 0.773560158 | 2.071049636  | 0.042845029 | 1.835883308  | 0.071663675 |
| ATP2A1   | -0.366380618 | 0.71496865  | -1.488287873 | 0.142130017 | -1.688541091 | 0.096845792 |
| ATP2A2   | 2.386690278  | 0.019163262 | 0.368839952  | 0.713599408 | 0.2120978    | 0.832797596 |
| ATP2A3   | -1.180440844 | 0.241035335 | -0.182425595 | 0.855889317 | 0.48449883   | 0.629913615 |
| ATP2B1   | -1.408095824 | 0.162658405 | 0.429381455  | 0.669247629 | -1.145401215 | 0.256894029 |
| ATP2B4   | 1.063457739  | 0.290510939 | -0.331084006 | 0.74178258  | -0.177246639 | 0.859951515 |
| ATP2C1   | 1.418424875  | 0.159631333 | 0.801704113  | 0.426019404 | -0.211372802 | 0.83336051  |
| ATP2C2   | -1.619100945 | 0.109037371 | -0.183758697 | 0.854848163 | 0.631684619  | 0.530152495 |
| ATP5A1   | -0.007446952 | 0.99407526  | 3.0487148    | 0.003468172 | 3.485447631  | 0.000959942 |
| ATP5B    | -0.176237548 | 0.860516028 | 1.461919036  | 0.149198365 | 2.185870773  | 0.033004364 |
| ATP5C1   | 0.779238655  | 0.437949109 | -1.287132486 | 0.203196774 | -1.01551624  | 0.314209062 |
| ATP5D    | -0.130177659 | 0.89672574  | 2.279721331  | 0.026345898 | 1.908473565  | 0.061438999 |
| ATP5E    | -2.214588862 | 0.02939599  | -3.43854571  | 0.001093224 | -2.32931742  | 0.023458954 |
| ATP5F1   | 0.467781564  | 0.641107958 | 0.053775744  | 0.957299927 | 0.893298682  | 0.375504148 |
| ATP5G1   | -2.082657609 | 0.040212022 | -1.228871292 | 0.224117283 | -0.343159308 | 0.732758143 |
| ATP5G2   | -1.141999154 | 0.256580936 | -1.256251679 | 0.214096383 | -0.725908068 | 0.470905485 |
| ATP5G3   | -0.403080341 | 0.687875839 | -1.002240194 | 0.320419741 | -0.640601141 | 0.524383672 |
| ATP5H    | -0.294493889 | 0.769080548 | -0.321906822 | 0.748688719 | 0.942758774  | 0.349836865 |
| ATP5I    | -0.045913775 | 0.963483974 | -2.715661511 | 0.008716102 | -1.99285232  | 0.051138626 |
| ATP5J    | -0.285414385 | 0.776003619 | -2.334539095 | 0.023076409 | -1.715417288 | 0.091774231 |
| ATP5J2   | 0.053285353  | 0.957626451 | -5.687520932 | 4.52E-07    | -4.351838305 | 5.75E-05    |
| ATP5L    | 0.434657134  | 0.664885203 | -0.305888616 | 0.760792357 | 0.528614368  | 0.599153121 |
| ATP5O    | 0.262047159  | 0.793903193 | -0.275358385 | 0.784026365 | 0.614889694  | 0.541107708 |
| ATP5S    | 1.623637298  | 0.108063406 | -2.502014346 | 0.015211875 | -1.53997811  | 0.129174078 |
| ATP5SL   | -0.239750809 | 0.811086186 | 0.192127623  | 0.848318022 | 0.587911     | 0.558945587 |
| ATP6AP1  | -1.88862507  | 0.062266901 | 0.298365319  | 0.766498109 | 0.495454914  | 0.622209602 |
| ATP6AP1L | -0.347196292 | 0.729280523 | 0.277439359  | 0.782436151 | 0.204411263  | 0.838770118 |
| ATP6AP2  | -0.188859749 | 0.850641661 | 2.341775327  | 0.022672994 | 1.767090808  | 0.082638957 |
| ATP6VOA1 | -1.759542668 | 0.08199311  | 1.417762907  | 0.161647558 | 1.93820105   | 0.057624715 |
| ATP6VOA2 | 2.48018893   | 0.015053092 | -0.977419304 | 0.332449206 | -0.967370514 | 0.337500816 |
| ATP6VOB  | -2.910996533 | 0.004572766 | -1.894397132 | 0.063196786 | -2.051108317 | 0.044925812 |
| ATP6VOC  | -1.644151847 | 0.103746036 | -1.815383953 | 0.074672008 | -2.149397011 | 0.035920036 |
| ATP6VOD1 | -2.605433616 | 0.010788399 | 0.443811568  | 0.658841701 | 0.660691798  | 0.511507464 |
| ATP6VOE1 | -2.828220201 | 0.00580622  | -1.603296209 | 0.11433963  | -1.106091639 | 0.273396175 |
| ATP6VOE2 | -0.068325066 | 0.94568332  | 0.69387068   | 0.49055242  | 1.185384709  | 0.240850196 |
| ATP6V1A  | -2.286452955 | 0.024650948 | -0.235127468 | 0.814943761 | -1.471892474 | 0.14662432  |
| ATP6V1B2 | -3.539631345 | 0.000645313 | 0.852813203  | 0.397295441 | 0.269477988  | 0.788548195 |
| ATP6V1C1 | 1.022506594  | 0.309369905 | 2.114715606  | 0.038792917 | 0.883456063  | 0.380751127 |

|          |              |             |              |             |              |             |
|----------|--------------|-------------|--------------|-------------|--------------|-------------|
| ATP6V1C2 | -0.018349171 | 0.985402227 | 0.329319105  | 0.743109091 | -0.928821217 | 0.356951447 |
| ATP6V1D  | -2.082834638 | 0.040195467 | -0.662134934 | 0.510525467 | -0.776945973 | 0.440446578 |
| ATP6V1E1 | -1.816143812 | 0.072785226 | 2.483483522  | 0.015943623 | 2.67088148   | 0.009875222 |
| ATP6V1E2 | 0.023535986  | 0.981276516 | 2.159078285  | 0.035022403 | 3.112148068  | 0.002917652 |
| ATP6V1F  | -1.450168571 | 0.150599425 | -4.41290256  | 4.53E-05    | -4.141478865 | 0.000116991 |
| ATP6V1G1 | 0.027980669  | 0.977741515 | -1.361239484 | 0.17873997  | -1.2666599   | 0.210498069 |
| ATP6V1G2 | -0.147275504 | 0.883254596 | -1.165220977 | 0.248732674 | 0.364383922  | 0.716937918 |
| ATP6V1H  | -0.453946955 | 0.650994981 | 3.224415221  | 0.002081119 | 3.57132152   | 0.000736349 |
| ATP7A    | -0.074487438 | 0.94079317  | -2.254972476 | 0.027952108 | -2.758023173 | 0.007830167 |
| ATP7B    | 0.185192289  | 0.853508339 | -0.324781424 | 0.746523227 | 0.195813422  | 0.845462035 |
| ATP8A1   | 1.58003693   | 0.117719623 | -0.580303319 | 0.563973605 | -1.620385172 | 0.11074411  |
| ATP8A2   | -0.530690811 | 0.596982225 | -2.281568697 | 0.026229352 | -1.551070438 | 0.126494736 |
| ATP8B1   | 1.919565381  | 0.058183137 | 0.203544289  | 0.839427064 | 1.087551883  | 0.281432207 |
| ATP8B2   | 2.699807895  | 0.008332835 | 0.08187889   | 0.935026898 | 0.843200428  | 0.402688574 |
| ATP8B3   | 1.732141018  | 0.086784773 | -1.415003532 | 0.162451488 | -1.024433103 | 0.310017298 |
| ATP8B4   | 0.577660394  | 0.564982263 | 0.808996611  | 0.421846415 | -1.265217528 | 0.211010755 |
| ATP9A    | -1.824019747 | 0.071574941 | -0.461351303 | 0.646284192 | -0.309554688 | 0.758043726 |
| ATP9B    | 1.50647325   | 0.135560353 | 0.377938687  | 0.706865428 | 1.076431491  | 0.286330564 |
| ATPAF1   | 0.652485597  | 0.515804589 | 2.463379418  | 0.016773282 | 4.342987115  | 5.93E-05    |
| ATPAF2   | -0.636156936 | 0.526340605 | 2.11419954   | 0.038838785 | 2.436579577  | 0.018017465 |
| ATPBD4   | 0.186789722  | 0.852259457 | -0.400491945 | 0.6902759   | 0.506133303  | 0.614741518 |
| ATPIF1   | 0.971150466  | 0.334159836 | -1.560477877 | 0.124125285 | -1.009423055 | 0.317095347 |
| ATR      | 1.108486232  | 0.270700262 | -0.165333538 | 0.869260405 | -0.524553266 | 0.601955456 |
| ATRIIP   | -0.341979737 | 0.733189076 | 2.015973533  | 0.048475592 | 3.349728788  | 0.001449467 |
| ATRN     | 1.729657507  | 0.087230201 | 0.97185673   | 0.335185665 | 0.910707191  | 0.366336794 |
| ATRNLI   | 0.871395573  | 0.38593133  | 1.183035256  | 0.241655469 | 1.90618539   | 0.06174129  |
| ATRX     | 0.22164052   | 0.825112026 | -0.012335109 | 0.990200884 | -1.114089386 | 0.269979768 |
| ATXN1    | -0.113154402 | 0.910168279 | -1.025977558 | 0.309191865 | -2.208512451 | 0.031300907 |
| ATXN10   | 2.273126584  | 0.025476216 | 4.368600671  | 5.28E-05    | 5.001206971  | 5.92E-06    |
| ATXN1L   | -0.50372532  | 0.615724809 | -0.542194135 | 0.589776446 | -0.717347856 | 0.476128647 |
| ATXN2    | -0.693693589 | 0.489718402 | -1.947596605 | 0.056343356 | -1.926419189 | 0.059111549 |
| ATXN2L   | 0.574611685  | 0.567033634 | -1.514586103 | 0.135346117 | -1.073654815 | 0.287562818 |
| ATXN3    | 1.588865112  | 0.115710715 | -1.222974782 | 0.226319673 | -1.017094589 | 0.313464314 |
| ATXN7    | -0.434540246 | 0.664969736 | -0.252007893 | 0.801932052 | -1.862082945 | 0.067819184 |
| ATXN7L1  | 2.172386639  | 0.032540189 | -1.285450631 | 0.203779518 | -1.635818869 | 0.107462832 |
| ATXN7L2  | -1.663222326 | 0.099858669 | -0.175044535 | 0.861658541 | 0.991883626  | 0.325503001 |
| ATXN7L3  | -0.674981147 | 0.501473792 | 0.836378851  | 0.406398442 | 1.786475338  | 0.079413104 |
| ATXN7L3B | 1.358074975  | 0.177943915 | -0.4881221   | 0.627316509 | 0.005862188  | 0.995343423 |
| AUH      | 0.483279438  | 0.630108751 | -2.573239696 | 0.012673452 | -2.184540907 | 0.033106904 |
| AUP1     | -0.84858951  | 0.398433537 | -1.988991598 | 0.051459444 | -0.728177937 | 0.46952595  |
| AURKA    | -0.191344709 | 0.848700425 | -0.246787618 | 0.805950095 | 0.295640796  | 0.768593294 |
| AURKAIP1 | -0.577034548 | 0.565403077 | 0.028207705  | 0.977594003 | -0.099753256 | 0.920894975 |
| AURKAPS1 | -0.031138459 | 0.975230288 | -0.925483989 | 0.35857578  | -0.640576333 | 0.524399677 |
| AURKB    | 0.118021791  | 0.906321864 | 1.898936315  | 0.062585635 | 3.140556475  | 0.002687582 |
| AURKC    | -0.937342547 | 0.351171619 | 0.580471795  | 0.563860783 | 1.184044323  | 0.241376033 |
| AUTS2    | -0.966066953 | 0.336682705 | -0.683003372 | 0.497342918 | -1.290460428 | 0.202171461 |
| AVEN     | -1.592537529 | 0.114883149 | 3.750119128  | 0.000412144 | 2.98738072   | 0.004163934 |
| AVIL     | -0.63562044  | 0.526688666 | -1.647175089 | 0.104967842 | -1.516102357 | 0.13509475  |
| AVL9     | -0.596944348 | 0.552091529 | -0.151463826 | 0.880139116 | -0.994195274 | 0.324386452 |
| AVPI1    | 0.781494062  | 0.436628933 | 2.394520549  | 0.019917644 | 0.402569571  | 0.688791107 |
| AVPR2    | 1.08798698   | 0.279599235 | -1.183816688 | 0.241348388 | -1.474937592 | 0.145806149 |
| AXIN1    | 0.299075375  | 0.765594249 | -0.699778337 | 0.486882555 | -0.08820485  | 0.930027215 |
| AXIN2    | 3.532883823  | 0.000659875 | 1.060430806  | 0.293375299 | 1.643043349  | 0.105954269 |
| AXL      | -0.461081389 | 0.645888352 | 1.299304919  | 0.199016245 | 1.160566443  | 0.250721314 |
| AZI1     | 1.226735469  | 0.223224458 | 0.770191758  | 0.444333788 | 1.58503457   | 0.118566234 |
| AZI2     | -0.598492255 | 0.551063204 | -0.78007622  | 0.438540026 | -1.191447092 | 0.238482255 |
| AZIN1    | -1.770646565 | 0.08011456  | -0.052852011 | 0.958032706 | -1.2052909   | 0.233138289 |
| AZU1     | -4.48506199  | 2.21E-05    | 2.977980577  | 0.004240006 | 1.021058667  | 0.31159912  |
| B2M      | -0.472157607 | 0.637993907 | -1.032767399 | 0.306029906 | -1.088044181 | 0.281216716 |
| B3GALNT1 | -0.293878443 | 0.769549238 | 0.44276723   | 0.65959256  | 0.161253369  | 0.872471762 |
| B3GALNT2 | 0.693803938  | 0.48964953  | -0.840723098 | 0.403979819 | -1.017893821 | 0.31308765  |
| B3GALT2  | 0.318636397  | 0.750764294 | -0.7822371   | 0.43727939  | -2.098927997 | 0.040325203 |
| B3GALT4  | -0.74258535  | 0.459728764 | 0.502135862  | 0.617486281 | 0.463397984  | 0.64486762  |
| B3GALT6  | 0.51930703   | 0.604862434 | 0.452885623  | 0.652332546 | 1.256390822  | 0.214168388 |
| B3GALTL  | -0.427278318 | 0.670229985 | -0.312283804 | 0.755952639 | 0.256027519  | 0.798863807 |
| B3GAT1   | 1.810038779  | 0.07373506  | -3.093843803 | 0.003046547 | -2.944638439 | 0.004694426 |
| B3GAT3   | 0.810610632  | 0.41979643  | 1.764826014  | 0.082894619 | 2.863014788  | 0.005885952 |
| B3GNT1   | 1.062175898  | 0.291089067 | 1.142039025  | 0.258163363 | 1.672542666  | 0.099972486 |
| B3GNT2   | -0.870675387 | 0.38632237  | 0.993242257  | 0.324746438 | -1.268339301 | 0.2099023   |
| B3GNT3   | -0.556171161 | 0.579518425 | 2.722748168  | 0.00855254  | 0.465359218  | 0.643471348 |
| B3GNT5   | -2.0299977   | 0.045404945 | -0.462071294 | 0.645770889 | -1.884354786 | 0.064689418 |
| B3GNT7   | 0.509460657  | 0.611716428 | 0.29866087   | 0.766273712 | 0.496930404  | 0.621175292 |

|          |              |             |              |             |              |             |
|----------|--------------|-------------|--------------|-------------|--------------|-------------|
| B3GNT8   | -2.785837539 | 0.006549663 | 0.243130132  | 0.808768402 | 0.263290227  | 0.793289189 |
| B3GNT9   | 0.665180902  | 0.507690559 | -1.544823456 | 0.127866144 | -1.465578186 | 0.14833235  |
| B3GNTL1  | -1.495041397 | 0.138514362 | 0.23740913   | 0.813181866 | -0.223093022 | 0.824271474 |
| B4GALNT3 | 0.430190915  | 0.668118222 | -0.030588241 | 0.975703668 | -0.611884374 | 0.54308024  |
| B4GALNT4 | -0.541250813 | 0.589715028 | -1.075343427 | 0.286705066 | -1.078886844 | 0.285243964 |
| B4GALT1  | -2.345970853 | 0.021246007 | 0.018221126  | 0.985525423 | 0.017940668  | 0.985749686 |
| B4GALT2  | -0.587195262 | 0.558590112 | -1.767773088 | 0.082395455 | -0.017553503 | 0.048419376 |
| B4GALT3  | 0.479704633  | 0.632638602 | 1.365629782  | 0.177364781 | 1.798691805  | 0.077434631 |
| B4GALT4  | 3.355407065  | 0.001175169 | 1.633476481  | 0.107824039 | 2.012414866  | 0.048974566 |
| B4GALT5  | -3.341650396 | 0.001227951 | -0.911505805 | 0.365828218 | -1.411755511 | 0.163531286 |
| B4GALT6  | 0.453888029  | 0.651037229 | -1.52197994  | 0.133485752 | -2.392186386 | 0.020114715 |
| B4GALT7  | -1.018773414 | 0.311129172 | -0.34928237  | 0.728151126 | -1.096084222 | 0.27771365  |
| B7H6     | 0.949761629  | 0.344858642 | -1.3290381   | 0.189076339 | -1.01620106  | 0.313885781 |
| B9D2     | -3.10796625  | 0.002543604 | -0.530486936 | 0.597813839 | -0.850392794 | 0.398712948 |
| BAALC    | 0.909039556  | 0.365835234 | -1.327073739 | 0.189721226 | 0.130456734  | 0.896670624 |
| BABAM1   | -0.771446367 | 0.442528164 | 1.082293355  | 0.283632619 | 2.054861135  | 0.044548998 |
| BACE1    | 1.449488049  | 0.150788806 | 1.177225641  | 0.243947341 | 0.856653475  | 0.395272145 |
| BACE1-AS | 3.790714128  | 0.000276063 | 1.758172767  | 0.084030773 | 2.937139362  | 0.004793743 |
| BACE2    | -0.540985369 | 0.589897192 | 2.156153107  | 0.035260755 | 0.919632205  | 0.361692919 |
| BACH1    | -2.256195643 | 0.026559713 | -0.114741201 | 0.909049326 | -1.584545178 | 0.118677568 |
| BACH2    | 2.614120214  | 0.010537692 | 1.493249997  | 0.140829867 | 1.845475321  | 0.010735395 |
| BAD      | -0.972367088 | 0.333557888 | -0.37644224  | 0.707971351 | -0.595459827 | 0.553924996 |
| BAG1     | -3.766011701 | 0.000300594 | 1.663661755  | 0.101612372 | 1.066038504  | 0.290961684 |
| BAG2     | 1.773854699  | 0.079578481 | -0.330523807 | 0.742203544 | -0.195315766 | 0.845849729 |
| BAG3     | 1.692868398  | 0.094050981 | 2.28872579   | 0.025782132 | 2.012328369  | 0.048983958 |
| BAG4     | 0.089609335  | 0.928803191 | -1.742718401 | 0.086719841 | -2.621512145 | 0.011240239 |
| BAG5     | -0.036216235 | 0.97119273  | 1.444858425  | 0.153916352 | 0.952339673  | 0.345000148 |
| BAG6     | -2.740173532 | 0.00744733  | -0.265344331 | 0.791691622 | -0.46244557  | 0.645546142 |
| BAHCC1   | 2.451218401  | 0.016233114 | -0.137723807 | 0.89093905  | -0.512339036 | 0.610384465 |
| BAHD1    | 0.385790129  | 0.700591822 | 0.368087019  | 0.714157569 | 0.678585054  | 0.500183847 |
| BAI1     | 1.698409811  | 0.092996583 | -0.553869747 | 0.581812005 | 0.064727098  | 0.948620827 |
| BAI2     | 1.404643791  | 0.163679833 | -2.2506125   | 0.028243879 | -0.941745173 | 0.350351133 |
| BAIAP2   | -1.811563347 | 0.073496904 | 0.26622551   | 0.791016282 | -0.56468351  | 0.574534659 |
| BAIAP2L1 | 0.04262756   | 0.966095896 | 0.405680104  | 0.686533404 | 0.688500583  | 0.493968161 |
| BAIAP2L2 | 1.011935712  | 0.314368828 | -1.122749833 | 0.266202189 | 0.217345876  | 0.828725448 |
| BAIAP3   | -1.010740664 | 0.314937342 | -0.21605714  | 0.82970657  | -1.237310226 | 0.221113525 |
| BAK1     | -1.832466298 | 0.070295659 | -2.093418591 | 0.040725518 | -2.041752043 | 0.045877298 |
| BAMBI    | -1.79138666  | 0.076701055 | 1.618517825  | 0.111014746 | 1.013028144  | 0.3153855   |
| BANF1    | -0.575534183 | 0.566412534 | 1.249031561  | 0.216706103 | 2.046747368  | 0.045367152 |
| BANK1    | 0.816681358  | 0.4163364   | 0.667343049  | 0.507218047 | 0.591427099  | 0.55660427  |
| BANP     | -2.163353207 | 0.033250075 | -1.599001568 | 0.115292128 | -2.264961842 | 0.027386919 |
| BAP1     | -0.849264847 | 0.39805979  | 1.633959274  | 0.107722312 | 2.595621363  | 0.012022924 |
| BARD1    | 0.93465929   | 0.352545323 | 1.144552759  | 0.257128613 | 0.2563809    | 0.798592317 |
| BASP1    | -1.674981598 | 0.097521109 | -1.261765343 | 0.212119182 | -1.850105785 | 0.069554533 |
| BATF     | -0.086499454 | 0.931267729 | -0.04224712  | 0.966447816 | -0.409116136 | 0.684008402 |
| BATF2    | -2.70902589  | 0.008122569 | 0.143157229  | 0.88666567  | -1.539307101 | 0.1293376   |
| BATF3    | -0.188321971 | 0.851061892 | -2.199209626 | 0.031892137 | -1.83983279  | 0.071072652 |
| BAX      | -1.978610236 | 0.051016409 | -1.839644475 | 0.0709758   | -1.459844751 | 0.149896739 |
| BAZ1A    | -0.473406836 | 0.637106126 | 0.065822915  | 0.947746756 | -2.030178364 | 0.047078356 |
| BAZ1B    | -0.414234428 | 0.679719742 | 1.84393563   | 0.070338309 | 2.045038045  | 0.045541161 |
| BAZ2A    | -0.786420572 | 0.433753385 | -0.847421231 | 0.400268059 | -0.826861117 | 0.411810476 |
| BAZ2B    | -0.393542387 | 0.694879649 | -0.786794917 | 0.434627434 | -2.437706819 | 0.01796687  |
| BBC3     | -0.650901747 | 0.516821667 | -2.52281995  | 0.014426567 | -3.180905584 | 0.002389922 |
| BBIP1    | -0.550044603 | 0.583695142 | -1.793901213 | 0.078078431 | -1.608234951 | 0.113384065 |
| BBS1     | 2.727958819  | 0.00770578  | -0.582167534 | 0.562725832 | -0.079590156 | 0.936845773 |
| BBS10    | 0.192500354  | 0.847797959 | -2.850333616 | 0.006050502 | -3.020190757 | 0.003795193 |
| BBS12    | -1.269489081 | 0.207644757 | -1.261371288 | 0.212260039 | 0.043567755  | 0.965403283 |
| BBS2     | 3.239988438  | 0.001692805 | 1.054395807  | 0.296104821 | 2.231094942  | 0.029679534 |
| BBS4     | 2.259220708  | 0.026363203 | -1.439060253 | 0.155546031 | -1.029289037 | 0.307750572 |
| BBS5     | 0.66434554   | 0.508222367 | -0.938625531 | 0.351842644 | -1.514415739 | 0.135521009 |
| BBS7     | 1.053282111  | 0.295121956 | -0.06113183  | 0.951465856 | -0.624586981 | 0.534768087 |
| BBS9     | 2.212569955  | 0.02954012  | 0.881564716  | 0.381676406 | 1.738838838  | 0.087535147 |
| BBX      | -0.075976408 | 0.939611931 | -1.524051052 | 0.132968296 | -2.473884414 | 0.016409456 |
| BCAM     | -1.437570998 | 0.154135173 | 0.160477738  | 0.873066276 | -0.386682339 | 0.700450713 |
| BCAP29   | -0.182551936 | 0.855573397 | -1.598679798 | 0.11536375  | -1.042958922 | 0.301430141 |
| BCAP31   | -2.307803475 | 0.023377828 | 2.260639319  | 0.027576869 | 2.836622654  | 0.006327506 |
| BCAR3    | -0.724036285 | 0.470981748 | 0.320047971  | 0.750090111 | -1.484251734 | 0.14332586  |
| BCAS1    | 2.074117395  | 0.041017686 | -1.094987344 | 0.278080055 | 0.07692291   | 0.938957895 |
| BCAS2    | -0.831029197 | 0.408227143 | -2.069325523 | 0.043012296 | -0.851030048 | 0.398361875 |
| BCAS3    | -1.402807445 | 0.164225193 | 1.34686011   | 0.183301077 | 1.121144158  | 0.266991227 |
| BCAS4    | 1.617823648  | 0.10931288  | 0.846125741  | 0.400984307 | 2.405420252  | 0.019467708 |
| BCAT1    | -1.73332813  | 0.086572521 | 0.057840727  | 0.954075701 | -0.984919585 | 0.328882195 |

|          |              |             |              |             |              |             |
|----------|--------------|-------------|--------------|-------------|--------------|-------------|
| BCAT2    | -0.735654481 | 0.463915434 | 0.930825862  | 0.355828874 | 2.008497014  | 0.049401537 |
| BCCIP    | 2.019909203  | 0.046462864 | 0.498839034  | 0.619792678 | 1.757608653  | 0.084256216 |
| BCDIN3D  | 1.206859369  | 0.230750473 | -0.198561889 | 0.843304694 | 0.405651509  | 0.686537938 |
| BCKDHA   | -1.123398789 | 0.264351895 | -1.172737053 | 0.24572877  | -1.205753527 | 0.232961224 |
| BCKDHB   | 1.260988071  | 0.21067692  | -1.406206906 | 0.165035012 | -1.523496756 | 0.133238506 |
| BCKDK    | -2.001033207 | 0.048499025 | -0.881303793 | 0.38181639  | -1.105770551 | 0.273533965 |
| BCL10    | -3.200106864 | 0.001916617 | -0.186642769 | 0.852596591 | -0.595518686 | 0.553885939 |
| BCL11A   | -0.438478607 | 0.662123926 | 0.631522574  | 0.530197413 | 0.862310009  | 0.392179274 |
| BCL11B   | 1.249054369  | 0.214988262 | -0.411151555 | 0.682487228 | 0.709873188  | 0.480715989 |
| BCL2     | 1.549351785  | 0.124919526 | 1.397177751  | 0.16771972  | 1.214217407  | 0.229739049 |
| BCL2A1   | -0.421500681 | 0.674426872 | 0.114986297  | 0.908855916 | 0.341912229  | 0.733691396 |
| BCL2L1   | -3.616528941 | 0.00049947  | 0.276848299  | 0.782887725 | -0.332418548 | 0.740809163 |
| BCL2L11  | 0.699075597  | 0.486365504 | -1.497207611 | 0.139799655 | -1.954534993 | 0.055616313 |
| BCL2L12  | 0.757391546  | 0.450857388 | -2.612832428 | 0.011434964 | -2.549370356 | 0.013545531 |
| BCL2L13  | -1.862328146 | 0.065924954 | 3.103221275  | 0.00296518  | 2.307718829  | 0.024717397 |
| BCL2L15  | 1.626329711  | 0.107488659 | 0.316380677  | 0.752857371 | 1.032315698  | 0.306343452 |
| BCL2L2   | -0.018104762 | 0.985596646 | -1.019272704 | 0.312335917 | -1.269493197 | 0.20949368  |
| BCL3     | -1.347541019 | 0.181297363 | -1.483003824 | 0.143524897 | -2.326419559 | 0.023624414 |
| BCL6     | -1.181160149 | 0.240751025 | -0.342737685 | 0.733043523 | -0.634459092 | 0.528353921 |
| BCL7A    | 2.137821571  | 0.035329817 | -0.443207231 | 0.659276165 | 0.598080317  | 0.552187469 |
| BCL7B    | -0.044132677 | 0.964899564 | -1.450390816 | 0.152373822 | -0.972570989 | 0.334931376 |
| BCL7C    | -0.26182877  | 0.79407102  | 0.496210189  | 0.621634524 | 0.21031027   | 0.834185656 |
| BCL9     | -0.579174865 | 0.563964579 | -0.055643718 | 0.955818211 | 0.59037221   | 0.557306189 |
| BCL9L    | 0.469588184  | 0.63982156  | -1.608777039 | 0.113133292 | -0.58844434  | 0.558590129 |
| BCLAF1   | 0.95469496   | 0.342371449 | -0.262295159 | 0.79402976  | -1.367970858 | 0.17676271  |
| BCO2     | 1.543065151  | 0.126436866 | 0.798902639  | 0.427629042 | 0.110955041  | 0.912047046 |
| BCOR     | -0.135681887 | 0.892385537 | 0.603654425  | 0.548443559 | -0.036710223 | 0.970846059 |
| BCORL1   | -2.031173696 | 0.04528298  | -0.217578557 | 0.82852646  | -0.320661719 | 0.749655306 |
| BCR      | -0.908849168 | 0.365935172 | 2.550651634  | 0.01343344  | 1.540594352  | 0.129024047 |
| BCRP2    | -0.517806826 | 0.605904451 | 1.160774435  | 0.250522156 | 1.69936719   | 0.094775865 |
| BCRP3    | -0.148346863 | 0.882411588 | -0.140217221 | 0.888977571 | -0.329045785 | 0.74334338  |
| BCS1L    | -0.163056039 | 0.870851653 | 1.081221488  | 0.284104975 | 2.294652521  | 0.025507535 |
| BDH1     | 2.053308493  | 0.043039209 | 1.683456128  | 0.097700024 | 3.480382103  | 0.000974972 |
| BDH2     | 1.224304172  | 0.224135353 | -0.698466647 | 0.487696066 | -0.06275081  | 0.950187441 |
| BDNF-AS1 | 0.654931352  | 0.514236112 | -1.680589554 | 0.098258835 | -0.458466247 | 0.648384378 |
| BDP1     | 0.948715125  | 0.345387752 | -0.267358295 | 0.790148345 | -1.600013026 | 0.115199204 |
| BEAN1    | -0.15415973  | 0.877840069 | 0.171794629  | 0.864201172 | 0.123248447  | 0.902349793 |
| BECN1    | -0.633044302 | 0.528361643 | 2.266637008  | 0.027184584 | 1.422771474  | 0.160326104 |
| BEGAIN   | 0.534711379  | 0.594210459 | 0.085127963  | 0.93245488  | 1.415016275  | 0.162577415 |
| BEND2    | -4.391302764 | 3.15E-05    | 0.880701423  | 0.382139682 | -1.166471908 | 0.248346595 |
| BEND3    | -1.075050597 | 0.285318098 | 1.110091694  | 0.271572661 | 0.040332311  | 0.967971042 |
| BEND4    | 0.474169755  | 0.636564209 | 0.951735751  | 0.345207969 | -0.191388969 | 0.848910198 |
| BEND5    | 1.30641203   | 0.194848242 | 0.974412421  | 0.333926572 | 1.200905712  | 0.234821535 |
| BEND7    | -1.407751163 | 0.162760168 | 0.263676186  | 0.792970537 | -0.230054186 | 0.818884436 |
| BEST1    | -0.774633489 | 0.440651927 | -1.449844326 | 0.152525654 | -1.284652917 | 0.204180129 |
| BEST4    | 0.693850936  | 0.489620198 | -0.590731542 | 0.557011326 | -0.420743291 | 0.675546094 |
| BET1     | 0.109258306  | 0.913248687 | 0.129230196  | 0.897625735 | -0.1627091   | 0.871330743 |
| BET1L    | -0.180127902 | 0.857470156 | 2.806510995  | 0.006821507 | 3.370467058  | 0.001361786 |
| BEX2     | 2.425317964  | 0.017357382 | -0.275033833 | 0.78427446  | 0.720325929  | 0.474307834 |
| BEX4     | 1.474008066  | 0.144080936 | -2.345829152 | 0.022449754 | -1.24000734  | 0.220121863 |
| BEX5     | 1.321681046  | 0.18973186  | -0.369085774 | 0.713417171 | 2.103764307  | 0.039883586 |
| BFAR     | -0.868459673 | 0.387526978 | 0.193200008  | 0.847482018 | 0.8857466    | 0.37952596  |
| BFSP1    | 0.39144542   | 0.696423056 | -1.457519402 | 0.150404078 | -1.239869743 | 0.220172374 |
| BHLHA15  | 0.293405236  | 0.769909665 | -1.272251778 | 0.208396161 | -1.815794549 | 0.074734229 |
| BHLHB9   | 1.013429317  | 0.313659248 | 0.007838238  | 0.993773141 | -0.228302688 | 0.820239052 |
| BHLHE40  | -1.859855545 | 0.066277991 | -1.493077758 | 0.140874839 | -2.129030378 | 0.037644333 |
| BHLHE41  | 0.164716116  | 0.869548712 | -1.303797434 | 0.19748973  | -0.263754416 | 0.792933258 |
| BICD1    | 0.495801732  | 0.621281762 | -1.199136707 | 0.235384891 | -0.58292899  | 0.56227142  |
| BICD2    | -0.111770132 | 0.911262583 | 0.917548878  | 0.362681375 | 0.200431096  | 0.841866526 |
| BID      | -2.373238756 | 0.019830288 | -2.049053042 | 0.045021918 | -1.996346812 | 0.050746129 |
| BIK      | -0.858894391 | 0.392753984 | 0.286575917  | 0.775465405 | 0.744853495  | 0.45946185  |
| BIN1     | 0.304315081  | 0.761612991 | 2.545624797  | 0.013608095 | 2.873360528  | 0.005720778 |
| BIN2     | -1.291483837 | 0.199949272 | -0.902852408 | 0.370364697 | -0.204156511 | 0.838968229 |
| BIN3     | -3.030314829 | 0.003215071 | -0.438790883 | 0.662454696 | -0.847105335 | 0.400527092 |
| BIRC2    | -0.220829918 | 0.825741178 | -0.636892118 | 0.526718498 | -1.058674086 | 0.294274426 |
| BIRC3    | 1.381110843  | 0.170774495 | 0.366744289  | 0.715153683 | -0.346014181 | 0.730623225 |
| BIRC5    | 0.492803592  | 0.623390179 | 2.000747235  | 0.050140558 | 2.709536189  | 0.008914213 |
| BIRC6    | 0.613397038  | 0.541210779 | 0.363232589  | 0.717760895 | 0.003437981  | 0.997269606 |
| BIRC7    | 1.725178403  | 0.08803829  | -1.30382569  | 0.197480156 | -0.535548832 | 0.594382127 |
| BIVM     | 1.305299814  | 0.195224912 | 0.988547099  | 0.327019551 | 1.52753599   | 0.132233114 |
| BLCAP    | -0.86283056  | 0.390597797 | -0.554369153 | 0.581472491 | 0.442828813  | 0.659588278 |
| BLK      | 1.095319598  | 0.276393091 | -0.291194118 | 0.771948956 | -0.525415979 | 0.60135964  |



|         |              |             |              |             |              |             |
|---------|--------------|-------------|--------------|-------------|--------------|-------------|
| BLM     | 1.882328741  | 0.063126835 | -0.211220678 | 0.833460649 | 1.505284001  | 0.137847424 |
| BLMH    | 0.690088293  | 0.491971498 | 3.392440271  | 0.001258165 | 4.385848809  | 5.12E-05    |
| BLNK    | 0.160130059  | 0.873149027 | 0.210701782  | 0.833863651 | 0.757139217  | 0.452127154 |
| BLOC1S1 | -2.13626436  | 0.035463422 | -0.242070174 | 0.809585639 | -0.123249755 | 0.902348762 |
| BLOC1S2 | -0.03652686  | 0.970945762 | -0.467277753 | 0.642064207 | -0.995425911 | 0.323793089 |
| BLOC1S3 | -1.012293617 | 0.314198697 | -1.592094182 | 0.116837523 | -1.170008072 | 0.246932382 |
| BLVRA   | 0.321791018  | 0.748381239 | 1.938661455  | 0.057448028 | 1.533710818  | 0.130707834 |
| BLVRB   | -1.941420663 | 0.0554369   | 0.650038465  | 0.518251775 | -0.118128156 | 0.906387037 |
| BLZF1   | -0.082982107 | 0.934055986 | -0.782399487 | 0.437184741 | -1.808558128 | 0.075867015 |
| BMF     | 0.861877622  | 0.391119133 | 0.056607662  | 0.955053653 | 0.065519411  | 0.947992814 |
| BMI1    | 0.800346588  | 0.425685412 | -4.089805601 | 0.000135728 | -4.378995192 | 5.24E-05    |
| BMP1    | 1.004613296  | 0.317863073 | -0.194708249 | 0.846306531 | -0.940250028 | 0.351110618 |
| BMP2    | -0.866886353 | 0.388383752 | 0.344578932  | 0.731665987 | 1.562751809  | 0.123721337 |
| BMP2K   | -0.776425103 | 0.439599256 | -0.638178663 | 0.525886728 | -2.39911977  | 0.019773376 |
| BMP6    | -3.958496535 | 0.000153469 | 0.943791552  | 0.349218449 | -1.053600778 | 0.296571606 |
| BMP8A   | 3.306861543  | 0.001371535 | 1.473449401  | 0.146074397 | 2.548202725  | 0.01358614  |
| BMP8B   | 2.748551722  | 0.007274657 | -0.652695315 | 0.51654948  | 0.883266319  | 0.38085273  |
| BMPR1A  | 0.516253764  | 0.606984043 | -2.17340336  | 0.033875422 | -1.933997582 | 0.058151475 |
| BMPR2   | 0.478476277  | 0.633508909 | -1.233630607 | 0.222351142 | -1.922630146 | 0.059596611 |
| BMS1    | 1.485919125  | 0.140907567 | 3.091658923  | 0.003065802 | 3.090854675  | 0.003102063 |
| BMS1P4  | 1.709875273  | 0.090845619 | -0.232576187 | 0.816914993 | 0.110503723  | 0.912403319 |
| BMX     | -3.218909648 | 0.001807858 | -0.234780156 | 0.815212039 | -0.232836881 | 0.816733428 |
| BNC2    | 0.021727255  | 0.98271517  | -2.165467843 | 0.034506665 | -2.006438208 | 0.049627191 |
| BNIP1   | 1.212729778  | 0.228508815 | -0.792364745 | 0.431399618 | -0.204394336 | 0.838783281 |
| BNIP2   | -0.523097784 | 0.602233087 | 0.670812399  | 0.505021257 | -0.468095918 | 0.641525154 |
| BNIP3   | 3.289123655  | 0.00145067  | -0.971645262 | 0.335289988 | 1.094691325  | 0.278318344 |
| BNIP3L  | -4.582353327 | 1.52E-05    | 0.372493351  | 0.710892737 | -0.951714448 | 0.345314438 |
| BNIPL   | 1.770804529  | 0.080088094 | 0.860447547  | 0.393110031 | 1.46086409   | 0.149617668 |
| BOD1    | 0.413735407  | 0.680083831 | -0.728433354 | 0.469299741 | -0.566663836 | 0.573197364 |
| BOD1L   | -0.884039131 | 0.379106365 | -0.771599572 | 0.443505872 | -1.842934737 | 0.070611341 |
| BOK     | -0.339211304 | 0.735266219 | 0.175054274  | 0.861650923 | -0.280660445 | 0.780000802 |
| BOLA1   | 0.019272404  | 0.984667834 | 1.308468559  | 0.195911867 | 1.242598993  | 0.219172066 |
| BOLA3   | -0.101718485 | 0.919213693 | -3.386473634 | 0.001281159 | -1.089225839 | 0.280699943 |
| BOP1    | 0.324835359  | 0.746083807 | -0.268658987 | 0.789152089 | -1.125118227 | 0.265318056 |
| BORA    | 0.617795766  | 0.538320309 | 0.112138789  | 0.911103269 | 0.151781134  | 0.879902764 |
| BPGM    | -4.457925481 | 2.45E-05    | 0.684454523  | 0.496433196 | -0.647904328 | 0.519683367 |
| BPHL    | 0.439954513  | 0.661058729 | -0.05717611  | 0.954602804 | 0.799294912  | 0.427482551 |
| BPI     | -3.751726649 | 0.000315714 | 2.194102609  | 0.032276319 | 0.884233859  | 0.380334818 |
| BPNT1   | -0.675725939 | 0.501003016 | 0.596153874  | 0.553408226 | 2.199831709  | 0.031944632 |
| BPTF    | 0.605010259  | 0.546743621 | 0.594698274  | 0.55437431  | -0.19774405  | 0.843958362 |
| BRAF    | 0.0377753    | 0.969953196 | -1.505814653 | 0.137579693 | -2.76269138  | 0.007732467 |
| BRAP    | -1.694872072 | 0.09366861  | 1.020705632  | 0.311662176 | 1.066176443  | 0.290899882 |
| BRAT1   | 0.444395212  | 0.657857987 | 1.065325831  | 0.291174129 | 1.603780479  | 0.114364578 |
| BRCA1   | -1.607414865 | 0.11157895  | 0.830489858  | 0.409691215 | 0.782106884  | 0.437432477 |
| BRCA2   | 1.235089713  | 0.22011505  | -2.719937865 | 0.008617063 | -2.828453089 | 0.00647027  |
| BRCC3   | -0.36789543  | 0.713842824 | -1.264074927 | 0.211294999 | -0.702034959 | 0.485552897 |
| BRD1    | 2.498144762  | 0.014360877 | 0.032899476  | 0.973868497 | -0.547543952 | 0.586171714 |
| BRD2    | 0.293514564  | 0.769826389 | -1.629556671 | 0.108652851 | -1.346172937 | 0.183648211 |
| BRD3    | -1.273820239 | 0.206112346 | 0.174818912  | 0.861835014 | -0.248754814 | 0.804456668 |
| BRD4    | -1.622261327 | 0.108358087 | -1.111665068 | 0.27090101  | -0.752003117 | 0.455185159 |
| BRD7    | -0.315086399 | 0.753448918 | 2.440157417  | 0.017779866 | 2.377284061  | 0.020866303 |
| BRD7P3  | -0.145573988 | 0.884593725 | -0.90862151  | 0.367336319 | -0.511334463 | 0.611118744 |
| BRD8    | -0.241174421 | 0.809986191 | 1.391341021  | 0.169473032 | 1.928820981  | 0.058805825 |
| BRD9    | 1.119468531  | 0.266014809 | 1.420638175  | 0.160813147 | 2.688750137  | 0.009419773 |
| BRE     | -1.289510353 | 0.200630977 | 1.125589518  | 0.265007766 | 1.88977348   | 0.063946732 |
| BREA2   | 0.614034937  | 0.540791118 | 0.456772164  | 0.64955284  | 1.088877104  | 0.280852386 |
| BRF1    | 0.18514323   | 0.853546699 | 0.479766816  | 0.633210113 | 1.040251812  | 0.302674707 |
| BRF2    | -0.976102495 | 0.331714174 | 1.930083267  | 0.058525903 | 1.612385982  | 0.112476476 |
| BRI3    | -2.515342228 | 0.013724814 | -0.89669636  | 0.373613692 | -1.278076506 | 0.206472697 |
| BRI3BP  | -0.243178841 | 0.808438066 | -2.532193954 | 0.014084884 | -3.668660356 | 0.000543014 |
| BRIP1   | -0.090024163 | 0.928474498 | -0.591305761 | 0.556629207 | -0.408301826 | 0.684602606 |
| BRIX1   | 1.767727135  | 0.080604987 | -1.651315545 | 0.104116775 | -0.261098133 | 0.794970641 |
| BRK1    | -1.92757384  | 0.057163766 | -2.996451862 | 0.004024325 | -2.111169609 | 0.039215552 |
| BRMS1   | -1.566338822 | 0.120891721 | 1.473323619  | 0.146108197 | 1.807915118  | 0.075968364 |
| BRMS1L  | 0.992275923  | 0.323808798 | -1.526859236 | 0.132269233 | -1.620981204 | 0.110615899 |
| BROX    | -0.24572815  | 0.806470195 | -0.238175133 | 0.812590577 | -1.366480766 | 0.17722702  |
| BRP44   | -1.090209397 | 0.278624791 | 0.610608509  | 0.543860854 | 0.032204257  | 0.974423188 |
| BRP44L  | -0.856338607 | 0.394157933 | -0.867077249 | 0.389497729 | -0.224553885 | 0.823140241 |
| BRPF1   | 0.521963465  | 0.603019324 | -0.090451485 | 0.928242271 | -0.162751367 | 0.871297617 |
| BRPF3   | 0.680540236  | 0.497965705 | -0.853137581 | 0.397117046 | -0.223810864 | 0.82371556  |
| BRSK1   | 2.01708407   | 0.046762874 | -3.215639151 | 0.00213571  | -1.88415735  | 0.064716616 |
| BRSK2   | 0.478360403  | 0.633591034 | -2.289794197 | 0.025715954 | -1.906865063 | 0.061651367 |

|           |              |             |              |             |              |             |
|-----------|--------------|-------------|--------------|-------------|--------------|-------------|
| BRWD1     | 1.275344937  | 0.205574884 | -0.383338594 | 0.702880015 | -1.275938515 | 0.207222131 |
| BRWD3     | -0.153060966 | 0.878703878 | -2.093245981 | 0.040741518 | -2.739929445 | 0.008219671 |
| BSCCL2    | -0.150173382 | 0.880974688 | -1.494777753 | 0.140431467 | -1.343192528 | 0.184605303 |
| BSDC1     | -0.385019603 | 0.701160525 | -0.177373908 | 0.859837009 | -0.216568376 | 0.829328439 |
| BSG       | -2.969005369 | 0.003857547 | -0.43137659  | 0.667804938 | -0.934857283 | 0.353858854 |
| BSN       | -0.754996259 | 0.452285845 | -0.12986911  | 0.897122478 | 1.368018982  | 0.176747731 |
| BSPRY     | 0.13418992   | 0.893561667 | 0.658329049  | 0.512949698 | 0.342983895  | 0.173288939 |
| BST1      | -1.580234953 | 0.117674259 | -0.143957816 | 0.886036292 | -1.209946397 | 0.231360919 |
| BST2      | -2.144523239 | 0.034773265 | 1.657617994  | 0.102832119 | -0.273273308 | 0.785644225 |
| BTAf1     | 1.372653416  | 0.173380686 | -1.597721647 | 0.115577234 | -2.770244427 | 0.007576764 |
| BTBD1     | 0.906077545  | 0.367392    | -0.208826305 | 0.835320619 | -1.506060996 | 0.137648253 |
| BTBD10    | -2.119365079 | 0.036902716 | -0.28168809  | 0.779192309 | -1.042287053 | 0.301738699 |
| BTBD11    | -0.259505269 | 0.795857177 | -0.82310063  | 0.413845785 | 0.174100863  | 0.86241142  |
| BTBD18    | -0.221661357 | 0.825095855 | -0.568490029 | 0.571912218 | 0.529982214  | 0.598210616 |
| BTBD19    | 0.957069527  | 0.341178456 | -1.134764637 | 0.261174466 | -0.203298093 | 0.839635863 |
| BTBD2     | -0.124066398 | 0.901548282 | -1.532363862 | 0.130907402 | -0.836807779 | 0.406242556 |
| BTBD3     | 0.923095035  | 0.358505203 | 0.359022308  | 0.72089121  | -2.037289125 | 0.046337261 |
| BTBD6     | 0.341559783  | 0.733504038 | -0.779241101 | 0.439027799 | -0.430984589 | 0.668127096 |
| BTBD7     | -0.459776463 | 0.646821123 | -0.704637417 | 0.483875515 | -1.082185567 | 0.283788648 |
| BTBD9     | -0.392798074 | 0.69542733  | 1.007268464  | 0.318018794 | 0.728352724  | 0.469419817 |
| BTd       | -1.068257354 | 0.28835323  | 1.035720662  | 0.30466149  | 0.346919835  | 0.729946409 |
| BTF3      | -0.94532919  | 0.347103278 | 0.668796357  | 0.506297187 | 0.876703565  | 0.384377412 |
| BTF3L4    | 0.252026247  | 0.801613912 | -0.881140293 | 0.381904124 | -0.885098912 | 0.379872144 |
| BTG1      | 0.508983066  | 0.612049763 | -0.103137207 | 0.918212345 | -0.661992566 | 0.510679674 |
| BTG2      | -0.844572922 | 0.40066085  | -0.970803288 | 0.335705568 | -2.152528527 | 0.035661139 |
| BTG3      | 1.995789566  | 0.049078012 | -0.389555162 | 0.698302225 | -0.318393762 | 0.751365715 |
| BTK       | -1.079083441 | 0.283526706 | 2.445986813  | 0.017522203 | 1.927953022  | 0.058916151 |
| BTLA      | 1.195835255  | 0.235002984 | -0.63330375  | 0.529042067 | -0.779984544 | 0.438670498 |
| BTN1A1    | 1.833940445  | 0.070074358 | 0.558211498  | 0.57886352  | 0.487831313  | 0.627565875 |
| BTN2A1    | -1.061676909 | 0.291314331 | -0.342082525 | 0.733533897 | -0.882643746 | 0.38118622  |
| BTN2A2    | 0.024533752  | 0.980482925 | 0.044418987  | 0.964724069 | 0.531274431  | 0.597320858 |
| BTN2A3    | 0.22513717   | 0.822399403 | -1.012285672 | 0.315635214 | -1.075337383 | 0.286815678 |
| BTN3A1    | 0.002744276  | 0.997816657 | -1.019659503 | 0.312153953 | -0.617416992 | 0.539451774 |
| BTN3A2    | -1.008785938 | 0.315868734 | -0.342280209 | 0.733385923 | 1.66479634   | 0.10151585  |
| BTN3A3    | -0.003358526 | 0.997327962 | 0.093743802  | 0.925638019 | 0.109495477  | 0.913199299 |
| BTNL3     | -1.956200762 | 0.053642641 | 0.287807538  | 0.774527143 | -0.024563161 | 0.980490356 |
| BTNL8     | -3.273751995 | 0.001522691 | -1.491481973 | 0.141292036 | -1.483852646 | 0.143431449 |
| BTNL9     | 1.938725265  | 0.055769539 | -0.586955698 | 0.559527256 | -0.296923525 | 0.767618846 |
| BTRC      | 0.330901116  | 0.741513101 | -0.562528027 | 0.575939322 | 0.930396359  | 0.356142738 |
| BUB1      | 1.018168791  | 0.311414732 | 1.515887378  | 0.135017221 | 2.469580161  | 0.016588144 |
| BUB1B     | 0.105188591  | 0.91646778  | 1.59293386   | 0.116648774 | 1.852241008  | 0.06924245  |
| BUB3      | 1.714625986  | 0.089966375 | -0.436444176 | 0.664146213 | -0.478246577 | 0.634328696 |
| BUD13     | -0.740951739 | 0.460713623 | 1.214289066  | 0.229592653 | 2.183939797  | 0.033153345 |
| BUD31     | -1.745410184 | 0.084436446 | 0.337198384  | 0.737193082 | 0.569907335  | 0.571010343 |
| BYSL      | 1.399843026  | 0.165108506 | 1.306019521  | 0.196737943 | 2.26858567   | 0.027151144 |
| BZRAP1    | 2.569816052  | 0.011873727 | -2.230006343 | 0.029659585 | -0.964831102 | 0.338760197 |
| BZW1      | 0.29715384   | 0.767055865 | 0.342755571  | 0.733030137 | 0.291440493  | 0.77178675  |
| BZW2      | 0.981279281  | 0.329170126 | 2.793401279  | 0.007069185 | 3.746459146  | 0.000424431 |
| C10orf10  | 0.761058903  | 0.44867536  | 0.473478452  | 0.637661602 | 0.64262784   | 0.523077057 |
| C10orf103 | 0.092107426  | 0.92682399  | 2.492771034  | 0.015572997 | 3.345635012  | 0.001467395 |
| C10orf105 | -1.095591388 | 0.276274745 | -0.660184427 | 0.511767112 | -0.473793583 | 0.637481396 |
| C10orf11  | -0.18753484  | 0.851662477 | 2.197000661  | 0.032057813 | 1.447794179  | 0.15322688  |
| C10orf116 | 1.765648562  | 0.08095567  | -2.444220613 | 0.017599914 | -0.945424303 | 0.348486812 |
| C10orf118 | -0.203587154 | 0.839150544 | -2.034657373 | 0.046497843 | -2.788709995 | 0.007208178 |
| C10orf12  | -2.338383559 | 0.021655536 | 1.472302114  | 0.146382917 | 0.921145899  | 0.360909085 |
| C10orf125 | 0.642256636  | 0.522391745 | -0.039242668 | 0.968832624 | 0.919550291  | 0.361735368 |
| C10orf128 | -1.793267873 | 0.076397492 | -2.034753112 | 0.046487891 | -2.640705593 | 0.010690313 |
| C10orf137 | 1.094013417  | 0.276962337 | -1.321617384 | 0.191521238 | -1.985772924 | 0.051941779 |
| C10orf18  | 0.633726278  | 0.527918491 | -1.413666216 | 0.162842221 | -2.004237327 | 0.049869397 |
| C10orf2   | 1.095610709  | 0.276266333 | 1.900368561  | 0.062393843 | 2.689906323  | 0.009390977 |
| C10orf25  | 0.635489604  | 0.526773566 | -0.342415473 | 0.733284678 | -1.315507885 | 0.193677453 |
| C10orf26  | -2.099311379 | 0.038680153 | 2.080640607  | 0.041924815 | 2.168289813  | 0.034382749 |
| C10orf28  | -0.402034915 | 0.68864219  | 2.599518077  | 0.011838579 | 2.862961094  | 0.005886821 |
| C10orf32  | 0.217584607  | 0.828261174 | 0.218587495  | 0.827744081 | -0.256384265 | 0.798589732 |
| C10orf35  | 1.111183749  | 0.269544105 | 0.320538209  | 0.749720437 | 1.127299398  | 0.264402894 |
| C10orf46  | -0.732988895 | 0.465531345 | -0.022335642 | 0.982243123 | -0.144411359 | 0.885691936 |
| C10orf47  | -3.483115124 | 0.000777279 | 1.159770131  | 0.250927605 | 0.457568095  | 0.649025709 |
| C10orf54  | -2.736955188 | 0.007514648 | 0.876190481  | 0.384566177 | 0.928674068  | 0.357027057 |
| C10orf57  | -0.060291037 | 0.952061823 | -2.711354176 | 0.008816913 | -2.816763106 | 0.006679733 |
| C10orf58  | 3.331123119  | 0.001269837 | 1.373630195  | 0.174879599 | 2.380877873  | 0.020682787 |
| C10orf68  | 1.608855773  | 0.111263023 | -1.552044318 | 0.126129577 | -0.344650312 | 0.731642882 |
| C10orf76  | -0.31960584  | 0.750031701 | 0.407940671  | 0.684829726 | 1.592254822  | 0.116933417 |

|           |              |             |              |             |              |             |
|-----------|--------------|-------------|--------------|-------------|--------------|-------------|
| C10orf88  | 1.684716011  | 0.09561989  | -0.445987531 | 0.657278358 | -0.565308562 | 0.574112403 |
| C10orf91  | 1.899417509  | 0.060815835 | -0.552401782 | 0.582810527 | 0.350341464  | 0.727391303 |
| C10orf95  | 0.83737719   | 0.404670068 | -2.267673711 | 0.027117281 | -2.71465679  | 0.00879355  |
| C11orf1   | -0.693639259 | 0.489752313 | -0.441080032 | 0.660806367 | 0.52327112   | 0.602841451 |
| C11orf10  | -1.569608559 | 0.120128426 | -6.643845633 | 1.19E-08    | -5.603437439 | 6.58E-07    |
| C11orf2   | 0.949986445  | 0.344745044 | -0.303727587 | 0.762429955 | 0.417431387  | 0.67795229  |
| C11orf21  | 2.03201561   | 0.045195836 | -5.735669169 | 3.77E-07    | -4.190586525 | 9.93E-05    |
| C11orf24  | -1.073677505 | 0.285929799 | -0.922644946 | 0.360041232 | -0.016133406 | 0.987185065 |
| C11orf30  | -1.513019229 | 0.133891284 | -1.506667002 | 0.137361378 | -2.953939082 | 0.004573907 |
| C11orf31  | 0.768394984  | 0.44432884  | 0.047700582  | 0.962119888 | 0.329841751  | 0.742745051 |
| C11orf35  | 0.624063189  | 0.534215547 | -2.008423221 | 0.049295153 | -0.963032907 | 0.339653854 |
| C11orf42  | 0.663759588  | 0.508595572 | -1.083817053 | 0.282962087 | -0.307159385 | 0.759856624 |
| C11orf45  | 2.658170544  | 0.009345666 | 0.56140891   | 0.576696771 | 1.574145845  | 0.121063317 |
| C11orf46  | 1.568579976  | 0.120368126 | -0.288412933 | 0.77406607  | -0.341783746 | 0.73378757  |
| C11orf48  | -0.560443223 | 0.576614458 | 0.762845241  | 0.448668833 | 1.309240042  | 0.195777321 |
| C11orf49  | 0.058221925  | 0.953705088 | -0.28961824  | 0.773148345 | 1.113844229  | 0.270084044 |
| C11orf51  | 0.934171911  | 0.35279521  | -0.312215492 | 0.756004285 | 1.003061755  | 0.32012763  |
| C11orf54  | 0.030725064  | 0.975559026 | -2.444998455 | 0.017565652 | -2.268936627 | 0.027128406 |
| C11orf57  | 0.399423967  | 0.690557571 | -0.2014158   | 0.84108311  | -0.122658894 | 0.902814514 |
| C11orf58  | 1.151436128  | 0.252700601 | -0.880732242 | 0.382123138 | -0.545209795 | 0.587765158 |
| C11orf61  | 2.240082127  | 0.027628295 | -2.65734859  | 0.010174833 | -1.651930191 | 0.104122285 |
| C11orf63  | 1.659585848  | 0.100590679 | -1.43186722  | 0.157586402 | -0.093145545 | 0.926118985 |
| C11orf66  | 0.079640541  | 0.936705661 | 1.087646431  | 0.281281766 | 0.957811614  | 0.342257493 |
| C11orf67  | 0.50106713   | 0.617586569 | 0.5177323    | 0.606628007 | 0.511184205  | 0.611223266 |
| C11orf68  | -1.962007267 | 0.052951369 | 0.511185831  | 0.611175015 | -0.327167843 | 0.744755664 |
| C11orf71  | 0.507779771  | 0.612889968 | -0.352723303 | 0.725583437 | -1.052733421 | 0.296965573 |
| C11orf73  | -0.144265471 | 0.885623783 | -0.695393157 | 0.489605193 | -0.238893758 | 0.812056416 |
| C11orf75  | -1.523471357 | 0.131259812 | -0.265859186 | 0.791297015 | -0.34619548  | 0.730487719 |
| C11orf80  | 1.501694171  | 0.136789198 | 0.801456618  | 0.42616146  | 2.089807407  | 0.041169625 |
| C11orf82  | -2.374274395 | 0.01977821  | 1.727518035  | 0.089433876 | 1.334322804  | 0.187476047 |
| C11orf83  | -0.029525193 | 0.976513206 | -0.305523951 | 0.761068619 | 0.124068291  | 0.901703601 |
| C11orf84  | 0.471635621  | 0.638365019 | -2.511458809 | 0.014850726 | -2.919906367 | 0.005029417 |
| C11orf9   | -0.072066373 | 0.942714146 | -1.37286798  | 0.175115212 | -1.817704562 | 0.074437614 |
| C11orf92  | -0.489312043 | 0.625849544 | -0.241371486 | 0.810124451 | -0.131894589 | 0.895538426 |
| C11orf95  | 2.602003048  | 0.010888887 | -0.576433502 | 0.566568143 | -0.509805854 | 0.61218246  |
| C12orf10  | -0.77101239  | 0.442784003 | 1.903236526  | 0.062011293 | 2.233593222  | 0.029504799 |
| C12orf11  | 2.633129409  | 0.010007357 | 1.919722459  | 0.059850705 | 2.781494104  | 0.0073502   |
| C12orf23  | 1.700291107  | 0.092640819 | 0.501691906  | 0.61779664  | 0.434722684  | 0.665427369 |
| C12orf24  | 3.018278865  | 0.003332788 | -1.917579076 | 0.060127936 | -1.770759967 | 0.082020123 |
| C12orf26  | 0.051366372  | 0.652846218 | -0.180032493 | 0.857758977 | 0.077175011  | 0.938758244 |
| C12orf29  | 1.373777267  | 0.173032635 | -0.978046923 | 0.332141386 | -1.474536229 | 0.145913782 |
| C12orf32  | -1.119796607 | 0.265875719 | -0.886124528 | 0.379235307 | -0.221478895 | 0.825521824 |
| C12orf33  | 1.500458557  | 0.13710833  | -2.569763687 | 0.012787803 | -1.845935073 | 0.070167543 |
| C12orf34  | -0.59209659  | 0.555318243 | -1.327638017 | 0.189535807 | -0.959189203 | 0.341569278 |
| C12orf35  | -0.774334788 | 0.440827573 | -0.989372513 | 0.326619168 | -2.871147568 | 0.005755744 |
| C12orf4   | 0.131443782  | 0.895727092 | -1.233310572 | 0.222469582 | -0.950675065 | 0.345837333 |
| C12orf41  | 1.874374949  | 0.064227394 | 0.331830246  | 0.741221937 | -0.074624963 | 0.940777933 |
| C12orf42  | 1.194049066  | 0.235697281 | -0.762264443 | 0.449012599 | -0.722243715 | 0.47313737  |
| C12orf43  | -0.74429202  | 0.458701142 | 2.807113474  | 0.006810319 | 3.237088772  | 0.002026738 |
| C12orf44  | 1.040306407  | 0.301073802 | 3.054868667  | 0.00340763  | 3.964033626  | 0.00021028  |
| C12orf45  | -0.059202319 | 0.952926444 | 1.330410478  | 0.188626781 | 0.968132998  | 0.337123278 |
| C12orf47  | 2.193875321  | 0.030904366 | 1.05728397   | 0.294796388 | 1.061326993  | 0.293078087 |
| C12orf48  | 0.356794067  | 0.722108032 | 1.002315669  | 0.320383613 | 0.341969082  | 0.733648841 |
| C12orf49  | -0.927931563 | 0.356004797 | -0.768940639 | 0.445070312 | -0.672493015 | 0.504023757 |
| C12orf5   | -0.857166088 | 0.393703041 | -1.564955687 | 0.123071513 | -1.582884831 | 0.119055915 |
| C12orf51  | 0.511869958  | 0.610036098 | -1.049885945 | 0.298155904 | -0.525668261 | 0.601185458 |
| C12orf52  | 0.086500939  | 0.931266553 | -0.018015742 | 0.985688559 | -0.648253176 | 0.519459409 |
| C12orf53  | -0.185241824 | 0.853469606 | 0.506635247  | 0.614344837 | 0.016023849  | 0.98727208  |
| C12orf57  | 1.439345579  | 0.153633255 | 0.650454199  | 0.151798521 | 1.621251632  | 0.110557768 |
| C12orf60  | -0.061553796 | 0.951059055 | -2.005410515 | 0.049625487 | -1.303550102 | 0.197698376 |
| C12orf61  | 0.984624288  | 0.327533135 | -1.875193012 | 0.065838697 | -1.498342217 | 0.139636983 |
| C12orf62  | 0.788385702  | 0.432609476 | 0.590029666  | 0.557478574 | 1.170231568  | 0.246843195 |
| C12orf65  | 1.833784532  | 0.070097737 | -0.19801213  | 0.843732794 | 0.081714089  | 0.935164211 |
| C12orf66  | 1.004642779  | 0.317848952 | -0.42639488  | 0.671409576 | -1.217890989 | 0.228350703 |
| C12orf73  | 1.219043483  | 0.226115536 | -0.501422844 | 0.617984768 | -0.12060043  | 0.904437383 |
| C12orf75  | -0.460182202 | 0.646531037 | -3.078846424 | 0.003181031 | -2.803516168 | 0.006924649 |
| C12orf76  | -0.50595255  | 0.614166821 | 0.296727006  | 0.767742361 | 1.101440452  | 0.27539693  |
| C13orf15  | 0.901556787  | 0.369776089 | 0.710648174  | 0.480170108 | 0.722206099  | 0.473160312 |
| C13orf27  | 0.135674897  | 0.892391047 | 0.389412012  | 0.698407513 | -0.256952392 | 0.798153313 |
| C14orf1   | 0.353093939  | 0.724870265 | -2.792510767 | 0.007086306 | -1.6501487   | 0.104487447 |
| C14orf101 | 0.401454922  | 0.689067496 | -1.195207017 | 0.236904268 | -1.868431409 | 0.066914289 |
| C14orf102 | 0.333840957  | 0.739301176 | 2.72226846   | 0.008563523 | 3.013442385  | 0.003868452 |

|           |              |             |              |             |              |             |
|-----------|--------------|-------------|--------------|-------------|--------------|-------------|
| C14orf109 | -1.775380437 | 0.079324573 | -3.454728675 | 0.001040359 | -2.654934649 | 0.010298603 |
| C14orf118 | 0.036126651  | 0.971263956 | 0.162856274  | 0.871201648 | -0.514010668 | 0.609258475 |
| C14orf119 | -2.21910618  | 0.029075725 | -0.772053693 | 0.443239003 | -0.424592864 | 0.672753541 |
| C14orf126 | 0.678089322  | 0.499510725 | -1.149989278 | 0.254900841 | -0.987554015 | 0.327601142 |
| C14orf128 | 0.886680409  | 0.377690204 | -1.546517088 | 0.127457134 | -0.998033321 | 0.3225383   |
| C14orf129 | -0.458603439 | 0.647660092 | -0.651129754 | 0.517552205 | -0.906630668 | 0.368470546 |
| C14orf132 | 3.946392449  | 0.000160191 | 0.521392493  | 0.604092512 | 1.537402441  | 0.129802659 |
| C14orf135 | 0.312751122  | 0.755216588 | -0.392602319 | 0.696062437 | -0.851226932 | 0.398253448 |
| C14orf142 | 0.866223255  | 0.388745202 | -0.134581722 | 0.893411788 | -0.20837689  | 0.835687569 |
| C14orf148 | -1.369832185 | 0.174256754 | -1.186262625 | 0.240389023 | -1.371575906 | 0.175643235 |
| C14orf149 | 2.291508255  | 0.024344104 | -2.556426078 | 0.01323532  | -2.566978617 | 0.012946343 |
| C14orf153 | -1.102783065 | 0.273156014 | -0.572003232 | 0.569545634 | 0.606130121  | 0.546867258 |
| C14orf159 | -3.231925138 | 0.001735983 | -1.157442844 | 0.251868965 | -0.364242731 | 0.717042755 |
| C14orf166 | 0.250016864  | 0.803162452 | 0.343064695  | 0.732798805 | 0.931629342  | 0.355510529 |
| C14orf167 | -0.483113123 | 0.630226353 | -4.164230478 | 0.000105776 | -3.409219656 | 0.001211237 |
| C14orf169 | 1.645781366  | 0.10340916  | -0.937876328 | 0.35222428  | -1.604542922 | 0.114196265 |
| C14orf182 | 1.001471577  | 0.319370204 | -0.728065692 | 0.469523035 | 0.362533651  | 0.718312223 |
| C14orf2   | 0.649010896  | 0.51803727  | -1.646204183 | 0.105168229 | -0.786761236 | 0.434724702 |
| C14orf21  | 3.443331395  | 0.000885038 | -0.152466155 | 0.879352135 | 0.065558585  | 0.947961764 |
| C14orf28  | 0.359679094  | 0.719956844 | -0.683813529 | 0.49683492  | -0.590752892 | 0.557052834 |
| C14orf43  | 0.370260839  | 0.712086092 | -1.24861276  | 0.216858197 | -1.584465891 | 0.118695613 |
| C14orf45  | -2.538094007 | 0.012922243 | 0.231906064  | 0.817432958 | 0.03306601   | 0.97373903  |
| C14orf49  | 1.170243582  | 0.245091762 | 0.51734561   | 0.60689616  | -0.698880575 | 0.48750705  |
| C14orf55  | 0.319316681  | 0.75025019  | -0.709170884 | 0.481079328 | 0.575278322  | 0.567397798 |
| C14orf64  | -0.191276447 | 0.848753738 | -3.414181749 | 0.001177646 | -2.239652594 | 0.029084762 |
| C14orf79  | 0.443456872  | 0.658533789 | 0.871847635  | 0.386911367 | 1.015442937  | 0.314243678 |
| C14orf80  | 0.319341875  | 0.750231153 | 1.296026045  | 0.20013595  | 1.675278498  | 0.099432016 |
| C14orf93  | -0.071893814 | 0.942851075 | 0.853552446  | 0.396888961 | 1.332416227  | 0.188097519 |
| C15orf17  | 3.551400875  | 0.000620639 | 0.898437196  | 0.372693095 | 2.217518123  | 0.03064519  |
| C15orf23  | -1.818292839 | 0.072453309 | -0.609603409 | 0.544521999 | 1.11062023   | 0.271457982 |
| C15orf24  | -2.52557296  | 0.01335854  | 2.05176042   | 0.044748918 | 2.015749953  | 0.048613614 |
| C15orf26  | -3.505401053 | 0.000722456 | 2.401011722  | 0.019600154 | 1.430000553  | 0.158249386 |
| C15orf27  | 1.868288885  | 0.065808036 | 1.139111281  | 0.259372268 | 1.376574324  | 0.174100071 |
| C15orf29  | -0.751706157 | 0.454252169 | -1.398220886 | 0.167407847 | -1.572618374 | 0.121416963 |
| C15orf33  | 1.393083722  | 0.167136187 | -0.914235012 | 0.364404863 | -1.134158546 | 0.261539545 |
| C15orf34  | -0.837676497 | 0.40450282  | -1.825967395 | 0.07304018  | -2.423314326 | 0.01862256  |
| C15orf37  | -0.257196916 | 0.797632767 | -3.491231209 | 0.000929887 | -3.486345896 | 0.0009573   |
| C15orf38  | -1.271223734 | 0.207030011 | -0.066292919 | 0.947374199 | 1.138323318  | 0.259811739 |
| C15orf39  | -2.428912231 | 0.017197323 | 0.232180453  | 0.817220861 | -0.169875911 | 0.865717363 |
| C15orf40  | 0.8484778412 | 0.932631922 | -2.491058764 | 0.015640736 | -1.835141297 | 0.071775174 |
| C15orf41  | 0.116850157  | 0.907247538 | 0.116076411  | 0.907995757 | -0.899520151 | 0.37221133  |
| C15orf42  | -0.919470003 | 0.360386633 | 1.715442235  | 0.091639721 | 1.492860546  | 0.141063065 |
| C15orf44  | 1.000902373  | 0.319643769 | 1.93749035   | 0.057594176 | 3.151127953  | 0.002606399 |
| C15orf50  | -0.32095764  | 0.74901055  | -1.347014457 | 0.183251653 | -1.555763743 | 0.125374532 |
| C15orf52  | -0.102817904 | 0.918343609 | 0.60102995   | 0.550178148 | 0.657151947  | 0.513763811 |
| C15orf54  | -2.571641905 | 0.01181578  | 0.279566458  | 0.780811653 | 0.516623076  | 0.60744505  |
| C15orf57  | 1.543208197  | 0.126402179 | 1.560985949  | 0.124005357 | 2.370000582  | 0.021242704 |
| C15orf58  | -1.032920895 | 0.304497555 | 0.05330625   | 0.957672363 | 0.540100361  | 0.591260345 |
| C15orf61  | 0.688329276  | 0.49307283  | -3.482635109 | 0.000954851 | -4.028622254 | 0.000170097 |
| C15orf62  | 3.738453112  | 0.000330409 | 0.135775965  | 0.892471824 | 1.541067489  | 0.128908951 |
| C16orf13  | 0.020502747  | 0.983689169 | -2.436804999 | 0.017929584 | -1.587765136 | 0.117946587 |
| C16orf42  | -0.474278138 | 0.636487237 | 0.879208266  | 0.382941802 | 0.677425379  | 0.500913579 |
| C16orf45  | -0.273885568 | 0.784820367 | -0.712344116 | 0.479127502 | -0.192697451 | 0.84789013  |
| C16orf46  | -0.433332456 | 0.665843457 | -1.153144623 | 0.253614181 | -1.467357083 | 0.147849582 |
| C16orf48  | 0.21846929   | 0.827574035 | -1.885669121 | 0.064386144 | -1.121243462 | 0.266949327 |
| C16orf5   | -1.094325999 | 0.276826037 | 1.730875504  | 0.088828433 | 2.186718071  | 0.032939178 |
| C16orf52  | 1.422242005  | 0.158523703 | -2.212294197 | 0.030926132 | -2.664865858 | 0.010033028 |
| C16orf53  | 0.28765073   | 0.774296713 | 2.695187841  | 0.009204884 | 2.804600935  | 0.006904286 |
| C16orf54  | -2.546950687 | 0.01262142  | -0.490940307 | 0.625334084 | -0.199934943 | 0.84225269  |
| C16orf55  | -0.145517794 | 0.884637956 | 0.209922904  | 0.834468653 | -1.067878452 | 0.290138055 |
| C16orf57  | -2.04258477  | 0.044114033 | -0.37108552  | 0.711935307 | -0.47720488  | 0.635065606 |
| C16orf58  | 1.813767765  | 0.073153679 | -0.544147458 | 0.588440413 | 0.611811206  | 0.543128309 |
| C16orf61  | 0.915448688  | 0.362481099 | -0.174296877 | 0.862243357 | 0.114381066  | 0.909343121 |
| C16orf62  | -0.64495599  | 0.520649177 | 1.688514561  | 0.09672029  | 2.029077933  | 0.047193954 |
| C16orf7   | -0.361586774 | 0.718535641 | -1.260318458 | 0.21263672  | -1.53798635  | 0.129659945 |
| C16orf70  | 0.941688544  | 0.348954    | 0.458268926  | 0.648483666 | 1.014457447  | 0.314709324 |
| C16orf71  | 0.72490124   | 0.4704536   | -0.61854566  | 0.538654306 | 0.004792472  | 0.996193135 |
| C16orf72  | -0.328038253 | 0.743669198 | 0.035692971  | 0.971650592 | -1.05981479  | 0.29375961  |
| C16orf74  | -0.524609213 | 0.60118619  | 2.22056346   | 0.030329007 | 1.212677143  | 0.230322988 |
| C16orf79  | 0.208150713  | 0.835596754 | 1.322638856  | 0.191183285 | 1.770591643  | 0.082048428 |
| C16orf80  | 1.734834231  | 0.086303848 | -1.568948668 | 0.122137896 | -0.756836731 | 0.452306922 |
| C16orf86  | -0.61341857  | 0.541196611 | 0.497505625  | 0.620726599 | 0.028499838  | 0.977364397 |

|               |              |             |              |             |              |             |
|---------------|--------------|-------------|--------------|-------------|--------------|-------------|
| C16orf87      | -0.023969569 | 0.980931656 | -0.432177901 | 0.66722586  | -0.486758127 | 0.628321516 |
| C16orf88      | 1.561270993  | 0.12208239  | 0.901416177  | 0.371121086 | 1.775399716  | 0.081243122 |
| C16orf91      | 0.623296233  | 0.53471699  | 1.235494956  | 0.221662093 | 1.327485342  | 0.189712038 |
| C16orf93      | 1.232491669  | 0.221078624 | 0.63626924   | 0.527121445 | -1.014722299 | 0.314584136 |
| C16orf95      | 0.902962395  | 0.369033775 | 1.006958637  | 0.318166382 | 0.986487348  | 0.328119432 |
| C17orf100     | 2.363351533  | 0.020333638 | -0.743895685 | 0.459963666 | -0.52325215  | 0.602854565 |
| C17orf101     | 0.572051625  | 0.568759009 | 1.596488451  | 0.11585247  | 1.551910203  | 0.126293714 |
| C17orf103     | -1.677415079 | 0.09704297  | 0.006808018  | 0.994591555 | -0.02009219  | 0.984040949 |
| C17orf104     | 0.866483954  | 0.388603072 | -1.054391014 | 0.296106996 | -1.510057564 | 0.136627391 |
| C17orf106-CDK | 2.426969986  | 0.01728365  | -4.018829577 | 0.000171829 | -3.067146516 | 0.003320199 |
| C17orf107     | 0.31898417   | 0.750501461 | -2.433236423 | 0.018090199 | -2.502278133 | 0.015273583 |
| C17orf108     | 0.963023738  | 0.338198954 | -0.499647352 | 0.619226838 | -0.052576415 | 0.958255728 |
| C17orf109     | -2.232636518 | 0.028134672 | 0.665893497  | 0.508137426 | 0.054858877  | 0.956445325 |
| C17orf110     | -0.64694637  | 0.519366241 | -1.560292586 | 0.124169045 | -1.750221606 | 0.085534287 |
| C17orf28      | 2.149900783  | 0.0343322   | 2.160426987  | 0.034912982 | 2.529902948  | 0.014237176 |
| C17orf37      | -1.931104909 | 0.056719131 | -1.119030125 | 0.267772511 | -1.16330184  | 0.249619334 |
| C17orf39      | -1.757527146 | 0.082337962 | -0.310523969 | 0.757283469 | 0.101682296  | 0.91937054  |
| C17orf42      | 0.621221584  | 0.536074624 | -0.536461834 | 0.593705483 | -0.301752269 | 0.763953997 |
| C17orf46      | 1.747089757  | 0.084142966 | -1.025873942 | 0.309240289 | -1.393609454 | 0.168918859 |
| C17orf48      | 1.034362521  | 0.303827193 | -2.306203325 | 0.024718345 | -1.568495732 | 0.122375596 |
| C17orf49      | -0.69259166  | 0.490406443 | 1.386847733  | 0.170832366 | 1.570355933  | 0.121942296 |
| C17orf51      | 1.084033854  | 0.281338345 | -0.537337711 | 0.593104344 | 0.685943682  | 0.495566919 |
| C17orf53      | 0.627952367  | 0.531676491 | 2.088703784  | 0.041164515 | 3.238386662  | 0.002018997 |
| C17orf54      | 0.40897079   | 0.683563944 | 0.338828739  | 0.73597094  | 0.290413402  | 0.772568246 |
| C17orf55      | 1.813423474  | 0.073207196 | 0.05627446   | 0.95531793  | 1.872280347  | 0.066370656 |
| C17orf56      | -0.348636064 | 0.728203014 | -0.857894337 | 0.394506728 | -0.16152726  | 0.872257062 |
| C17orf57      | 0.889434276  | 0.376217214 | 0.054432315  | 0.956779104 | -0.907802097 | 0.36785658  |
| C17orf58      | 0.435794982  | 0.664062543 | 0.409190073  | 0.683917855 | -1.165982437 | 0.248542806 |
| C17orf59      | -0.241150815 | 0.810004428 | -0.404561333 | 0.687298485 | -0.804678033 | 0.424394379 |
| C17orf61      | 1.272138025  | 0.206706536 | -0.932282015 | 0.355082457 | 0.052047873  | 0.958674989 |
| C17orf62      | -0.625661629 | 0.533171249 | 1.476628666  | 0.145222123 | 1.472869305  | 0.14636147  |
| C17orf63      | -0.53698417  | 0.592646257 | -1.001486597 | 0.320780621 | -0.990501477 | 0.326171816 |
| C17orf65      | -0.877117529 | 0.382833225 | -1.387838857 | 0.170531807 | 0.362243974  | 0.718527468 |
| C17orf66      | 1.692554613  | 0.094110977 | -1.046382818 | 0.29975583  | -0.336200031 | 0.737971273 |
| C17orf67      | 2.041968627  | 0.044176482 | 0.110032721  | 0.912765921 | 1.192127514  | 0.238217542 |
| C17orf69      | 2.975528246  | 0.003783942 | -0.033715465 | 0.973220618 | 1.295950368  | 0.200286266 |
| C17orf70      | 1.227280748  | 0.223020538 | 0.61802178   | 0.538997164 | 1.356792706  | 0.180268575 |
| C17orf72      | 0.673457752  | 0.502437455 | -1.041173642 | 0.30214578  | 0.179798664  | 0.857956929 |
| C17orf75      | 2.452687967  | 0.016171321 | 0.816310959  | 0.417685725 | 3.204717854  | 0.002229094 |
| C17orf76      | -4.79334021  | 6.69E-06    | -0.940489277 | 0.350894439 | 0.003599408  | 0.997140832 |
| C17orf79      | 0.151872308  | 0.879638522 | 1.391094049  | 0.16954753  | 1.16699261   | 0.248137987 |
| C17orf80      | 2.148814219  | 0.034420925 | 0.692357568  | 0.491494822 | 0.393696081  | 0.695294201 |
| C17orf81      | 0.326229889  | 0.74503218  | 1.059496454  | 0.293796752 | 0.505401033  | 0.615252346 |
| C17orf85      | 1.61217297   | 0.110538439 | 0.333529597  | 0.739945759 | -0.639045497 | 0.525387762 |
| C17orf87      | -1.360935383 | 0.177041473 | -0.394863287 | 0.694402286 | -0.251923922 | 0.802018276 |
| C17orf89      | 0.527719597  | 0.599034407 | -0.3434489   | 0.73251132  | 0.14149243   | 0.887986591 |
| C17orf90      | -0.465161468 | 0.642975538 | -1.434519913 | 0.156831532 | -0.717530566 | 0.476016824 |
| C17orf91      | -0.407315096 | 0.684774883 | -0.907837181 | 0.367747105 | -1.210343343 | 0.231209832 |
| C17orf96      | -0.466255163 | 0.642195683 | -1.251161121 | 0.21593394  | -0.663631107 | 0.509637954 |
| C17orf97      | 0.342688031  | 0.732657964 | 0.118769727  | 0.905871062 | -1.435932995 | 0.156560832 |
| C18orf1       | 0.570567457  | 0.569760445 | -0.77687022  | 0.440414319 | -1.462050935 | 0.14929325  |
| C18orf10      | -2.378037827 | 0.019589984 | -0.037949003 | 0.969859571 | -0.802514525 | 0.425633921 |
| C18orf18      | 1.577898728  | 0.118210349 | -0.77522101  | 0.441380314 | -0.291313071 | 0.771883691 |
| C18orf19      | 2.529799671  | 0.013209801 | 0.679300948  | 0.499668079 | 0.77471573   | 0.441752871 |
| C18orf21      | -1.513509046 | 0.133767045 | -2.060040983 | 0.043922815 | -1.119337664 | 0.267754259 |
| C18orf25      | -0.110722354 | 0.912090994 | -0.306469173 | 0.760352607 | -2.61558175  | 0.011415299 |
| C18orf32      | 0.170054761  | 0.865361041 | -3.306186545 | 0.001631919 | -3.312521777 | 0.001620316 |
| C18orf45      | -0.388417033 | 0.698654264 | -1.110610652 | 0.271350996 | -0.040733558 | 0.96765258  |
| C18orf54      | 1.649182676  | 0.102708848 | -1.936265316 | 0.057747392 | -1.592170736 | 0.116952328 |
| C18orf55      | 1.687542202  | 0.095073599 | -1.720315446 | 0.090744206 | -0.689880112 | 0.493106759 |
| C18orf8       | 0.136536853  | 0.891711669 | -2.063189266 | 0.043612215 | -0.821343315 | 0.41491917  |
| C19orf10      | 1.154906071  | 0.251284328 | -1.150306411 | 0.254771313 | -1.075347176 | 0.286811333 |
| C19orf12      | 2.171201358  | 0.032632574 | -2.075253421 | 0.042439558 | -1.551990138 | 0.126274593 |
| C19orf2       | 2.82679805   | 0.006608399 | 0.432812757  | 0.666767218 | 1.162318336  | 0.250015147 |
| C19orf20      | 0.365413963  | 0.71568741  | -2.321251011 | 0.023833897 | -2.422797411 | 0.018646504 |
| C19orf22      | -2.53208719  | 0.013129925 | -0.405214763 | 0.686820857 | -0.947406006 | 0.347485313 |
| C19orf23      | 1.465543108  | 0.14636987  | -0.416462187 | 0.678619749 | -0.297238051 | 0.767379968 |
| C19orf24      | -0.372813937 | 0.710191711 | 0.733454635  | 0.466256181 | 0.664600471  | 0.509022209 |
| C19orf25      | -0.013985847 | 0.988873226 | 1.032074474  | 0.306351582 | 0.775157139  | 0.441494149 |
| C19orf28      | -0.254848332 | 0.799440397 | -0.202767386 | 0.840031441 | -0.55546259  | 0.580781335 |
| C19orf29      | 0.85360401   | 0.395663526 | -2.092581119 | 0.040803197 | -1.694868965 | 0.095631454 |
| C19orf29OS    | 2.436052948  | 0.016883236 | -2.071735833 | 0.042778614 | -2.967139653 | 0.004407785 |

|           |              |             |              |             |              |             |
|-----------|--------------|-------------|--------------|-------------|--------------|-------------|
| C19orf34  | 1.841678262  | 0.068922265 | 0.45225013   | 0.652787532 | 0.672762491  | 0.503853565 |
| C19orf35  | -1.815128912 | 0.072942417 | 0.023935187  | 0.98098704  | -0.981442309 | 0.330578201 |
| C19orf38  | -2.440493934 | 0.016690491 | 0.056467506  | 0.955164816 | -0.4145708   | 0.680033311 |
| C19orf39  | 0.221188453  | 0.825462885 | 0.814529305  | 0.418696908 | 0.821572917  | 0.41478953  |
| C19orf40  | -0.785609484 | 0.434226041 | -1.425034724 | 0.159543716 | -0.055199725 | 0.956174991 |
| C19orf42  | -0.25610043  | 0.79847656  | 1.841863611  | 0.070645522 | 2.917395365  | 0.005064641 |
| C19orf43  | 0.29251839   | 0.770585283 | -4.404570428 | 4.67E-05    | -3.654914211 | 0.000567023 |
| C19orf44  | 0.617941096  | 0.538224946 | 1.069709382  | 0.289212651 | 1.709180138  | 0.092931233 |
| C19orf46  | 0.950655534  | 0.344407102 | 1.603672471  | 0.114256484 | 1.253081128  | 0.215361363 |
| C19orf47  | -1.184901017 | 0.239276297 | -2.111910713 | 0.039042789 | -1.803978413 | 0.076591328 |
| C19orf48  | 0.647799373  | 0.518816931 | 1.20809125   | 0.231949171 | 1.503310303  | 0.138354378 |
| C19orf50  | -1.546450704 | 0.125617926 | -2.881503077 | 0.005552028 | -2.025357134 | 0.047586636 |
| C19orf52  | 0.269730554  | 0.788004911 | 1.317308598  | 0.192951763 | 1.310502509  | 0.195352994 |
| C19orf53  | -0.212756578 | 0.832013479 | -2.543716465 | 0.013674936 | -1.030892756 | 0.307004444 |
| C19orf54  | -0.93049839  | 0.354682345 | -0.76218006  | 0.449062557 | 0.006184323  | 0.995087542 |
| C19orf55  | 0.464812362  | 0.643224552 | -0.475749637 | 0.636052287 | 0.768170373  | 0.445599728 |
| C19orf56  | -1.452993417 | 0.149815278 | -1.936275548 | 0.057746111 | -1.293073795 | 0.201272405 |
| C19orf57  | 0.202374422  | 0.840095502 | 0.450463023  | 0.654067736 | 0.720097121  | 0.47444759  |
| C19orf59  | -1.578449556 | 0.118083776 | 1.408199866  | 0.164446926 | 0.822548281  | 0.414239086 |
| C19orf6   | 1.271573676  | 0.206906158 | -2.431642593 | 0.018162351 | -2.014970638 | 0.048697752 |
| C19orf60  | 0.977367993  | 0.331091074 | -3.342528095 | 0.001463184 | -1.644750405 | 0.105600344 |
| C19orf63  | -0.77885294  | 0.438175115 | -0.097391659 | 0.922753489 | -0.089724672 | 0.928824804 |
| C19orf66  | -0.908099776 | 0.366328707 | -3.440600848 | 0.001086372 | -4.185322729 | 0.000101034 |
| C19orf70  | -1.136702314 | 0.258777265 | -2.909764221 | 0.005133207 | -2.424352402 | 0.018574558 |
| C19orf71  | 3.129026778  | 0.002385411 | -1.828738581 | 0.072617879 | -1.071859367 | 0.288361569 |
| C19orf73  | 1.412161606  | 0.161461656 | -1.986635358 | 0.05172735  | -2.140519204 | 0.036662969 |
| C19orf76  | 1.37248057   | 0.173434263 | -0.871406478 | 0.387150097 | 0.427570453  | 0.670596712 |
| C19orf77  | -3.243399737 | 0.001674842 | 0.890134354  | 0.377096809 | 0.332973083  | 0.740392773 |
| C19orf79  | 0.091845382  | 0.927031583 | -3.365754747 | 0.001364131 | -2.663002944 | 0.010082363 |
| C1D       | -0.337227196 | 0.736756101 | 0.377666086  | 0.707066841 | 0.195045714  | 0.846060127 |
| C1GALT1   | -0.32798672  | 0.743708028 | -1.66111328  | 0.102125254 | -2.4233246   | 0.018622084 |
| C1GALT1C1 | 0.392335019  | 0.695768138 | 0.804357301  | 0.424498316 | -0.125627829 | 0.900474575 |
| C1QA      | 0.01925186   | 0.984684176 | -0.392216226 | 0.696346082 | -1.264516311 | 0.211260335 |
| C1QB      | -0.127351862 | 0.898955173 | 0.601754733  | 0.549698841 | -1.255382933 | 0.214531161 |
| C1QBP     | 1.210697735  | 0.229282974 | 2.063120369  | 0.043618991 | 1.848639929  | 0.069769467 |
| C1QC      | 0.380876579  | 0.704221285 | 1.385209001  | 0.171330204 | 0.037411038  | 0.970289759 |
| C1QL3     | 0.818161396  | 0.41549545  | -1.325649257 | 0.190189914 | -1.013500132 | 0.315162103 |
| C1QTNF3   | 1.710352826  | 0.090756919 | 0.948158154  | 0.347010308 | 0.448014271  | 0.655864144 |
| C1QTNF4   | 0.130778243  | 0.896252011 | -1.820872163 | 0.073822023 | -2.338884812 | 0.022919991 |
| C1QTNF6   | 1.6619134    | 0.100121652 | 0.314088156  | 0.754588917 | 2.05357936   | 0.04467739  |
| C1R       | 0.344857721  | 0.731031841 | 0.493609236  | 0.623459226 | 0.193914024  | 0.846941948 |
| C1RL      | -0.181379821 | 0.856490449 | 0.338442883  | 0.736260123 | 0.330664578  | 0.742126698 |
| C1S       | 2.065984843  | 0.041797786 | 1.144725489  | 0.257057619 | 1.014341456  | 0.314764161 |
| C1orf109  | 3.679212246  | 0.000404305 | 0.930713352  | 0.355886588 | 0.951516447  | 0.345414009 |
| C1orf112  | 0.549993875  | 0.583729785 | -0.923033252 | 0.359840569 | -1.243710939 | 0.218765484 |
| C1orf115  | 0.177964415  | 0.859163751 | 1.247784713  | 0.217159146 | 1.291158382  | 0.201931056 |
| C1orf116  | -4.122015225 | 8.54E-05    | 0.963294173  | 0.339426956 | 0.812223709  | 0.420088214 |
| C1orf122  | -0.408368554 | 0.684004311 | 0.294512803  | 0.769424961 | 0.300538206  | 0.764874922 |
| C1orf123  | -0.12540119  | 0.900494643 | -0.731416337 | 0.467490301 | 0.135489924  | 0.892708345 |
| C1orf124  | -0.24799201  | 0.804723712 | -1.671908058 | 0.099967206 | -2.38922371  | 0.020262175 |
| C1orf127  | 0.72882582   | 0.468061405 | 3.761575798  | 0.000397295 | 4.366876258  | 5.47E-05    |
| C1orf131  | 0.634781812  | 0.527232979 | -0.72812336  | 0.469488008 | -0.54515224  | 0.587804475 |
| C1orf135  | 0.049607565  | 0.960548584 | 0.020996365  | 0.983321125 | 1.156346638  | 0.252428133 |
| C1orf144  | -2.023679666 | 0.046065034 | -0.290514505 | 0.772466135 | -0.199351734 | 0.842706661 |
| C1orf150  | -2.658939886 | 0.009325981 | 2.198905042  | 0.031914936 | -1.975906003 | 0.053079233 |
| C1orf151  | -0.76175974  | 0.448259066 | -0.255794405 | 0.799020929 | 0.505353036  | 0.615285836 |
| C1orf152  | 1.567011153  | 0.120734456 | 0.388006847  | 0.699441337 | 0.151098342  | 0.880438845 |
| C1orf159  | 1.773612402  | 0.079618865 | -0.238780177 | 0.812123611 | 0.813442749  | 0.419395013 |
| C1orf162  | -3.495367642 | 0.00074667  | 0.262657582  | 0.79375175  | 1.170434876  | 0.865279844 |
| C1orf172  | 0.735971987  | 0.46372317  | 0.569848421  | 0.570996602 | 1.480000442  | 0.144453795 |
| C1orf174  | 1.157180741  | 0.250358973 | 0.516141689  | 0.607731377 | -0.047422307 | 0.962344662 |
| C1orf177  | 0.403405189  | 0.687637774 | -1.991455563 | 0.051180565 | -1.305157773 | 0.197154159 |
| C1orf183  | -3.537597634 | 0.00064967  | -1.119997451 | 0.267363515 | -1.005911427 | 0.318766858 |
| C1orf186  | -2.089213148 | 0.039602884 | 1.218224963  | 0.228105258 | -1.074246482 | 0.287299937 |
| C1orf187  | 1.272669656  | 0.206518617 | -1.793823335 | 0.078091012 | -1.83531592  | 0.071748921 |
| C1orf192  | 0.606012282  | 0.54608108  | 0.057422694  | 0.954407237 | 0.033727135  | 0.973214165 |
| C1orf198  | -2.20840979  | 0.029839066 | 0.776960643  | 0.440361392 | -0.046097225 | 0.963396064 |
| C1orf200  | -1.431730451 | 0.155796056 | -0.977770443 | 0.332276965 | -0.491207462 | 0.625191314 |
| C1orf201  | -0.163681394 | 0.87036079  | -1.925985398 | 0.059046866 | 0.0865376    | 0.931346454 |
| C1orf204  | 0.830751187  | 0.408383357 | -0.579599546 | 0.564445016 | 0.752877751  | 0.454663564 |
| C1orf21   | -1.669721795 | 0.098561118 | -2.08680256  | 0.041342699 | -1.173758844 | 0.245438681 |
| C1orf212  | -1.573459711 | 0.119234333 | -1.118205173 | 0.268121658 | -1.036789104 | 0.304271759 |

|          |              |             |              |             |              |             |
|----------|--------------|-------------|--------------|-------------|--------------|-------------|
| C1orf213 | -0.302869845 | 0.762710482 | -1.035312252 | 0.304850481 | -1.350370674 | 0.182306607 |
| C1orf216 | 1.843493639  | 0.068654276 | 1.615224601  | 0.111727372 | 2.568482239  | 0.012896309 |
| C1orf220 | 1.066970132  | 0.288930831 | 0.468842381  | 0.640952067 | 0.327232997  | 0.74470665  |
| C1orf226 | 0.925214199  | 0.35740825  | 2.4353791    | 0.017993606 | 0.527333499  | 0.60003632  |
| C1orf228 | 0.467507093  | 0.64130349  | -0.692787197 | 0.491227137 | -0.123461766 | 0.902181651 |
| C1orf27  | 0.177345223  | 0.85964858  | -1.175170963 | 0.244761642 | -1.509437843 | 0.136785295 |
| C1orf31  | -0.826736557 | 0.410643211 | 0.152403047  | 0.87940168  | -0.071616454 | 0.943161235 |
| C1orf35  | 1.007157825  | 0.316645904 | -0.531408769 | 0.59717912  | 0.217161518  | 0.828868418 |
| C1orf38  | -3.13336069  | 0.002354016 | 0.079959929  | 0.936546307 | -0.15033504  | 0.881038204 |
| C1orf43  | -0.673601876 | 0.502346243 | -0.782630943 | 0.437049856 | -0.691809412 | 0.491903458 |
| C1orf50  | -0.463607861 | 0.644084021 | -2.453445186 | 0.017197438 | -1.789447048 | 0.078927987 |
| C1orf52  | -0.433539417 | 0.665693707 | -1.247560489 | 0.217240693 | -1.526265032 | 0.132548811 |
| C1orf55  | -1.930736834 | 0.056765342 | -0.871334934 | 0.387188822 | -1.544022867 | 0.128191873 |
| C1orf56  | 2.012750552  | 0.047226288 | 1.943477687  | 0.056850312 | 2.622099922  | 0.011223022 |
| C1orf63  | 2.434143598  | 0.016966714 | -1.326165574 | 0.190019933 | -2.28026537  | 0.026403429 |
| C1orf74  | -1.689562678 | 0.09468461  | 0.717057331  | 0.476236652 | -0.160046011 | 0.873418311 |
| C1orf85  | -1.979844975 | 0.050874946 | -0.955832661 | 0.343151545 | -1.910225527 | 0.061208398 |
| C1orf86  | 0.062834427  | 0.950042177 | 0.04630036   | 0.963231016 | 0.33064094   | 0.742144459 |
| C1orf87  | -5.454321491 | 4.53E-07    | 0.223420052  | 0.823999131 | -0.872686139 | 0.386545144 |
| C1orf9   | -0.318777495 | 0.750657654 | -0.419735885 | 0.676239983 | -1.528266914 | 0.132051829 |
| C1orf93  | 0.14216298   | 0.887279266 | -0.140335737 | 0.888884356 | 0.918747604  | 0.362151497 |
| C1orf95  | -0.370792185 | 0.711691688 | 0.640573645  | 0.524340175 | 0.477406358  | 0.634923049 |
| C1orf96  | 0.131589178  | 0.895612422 | -0.902717611 | 0.370435646 | -1.686448805 | 0.097250083 |
| C1orf97  | -1.574876768 | 0.118906683 | -1.734252708 | 0.08822205  | 0.331067858  | 0.741823695 |
| C2       | -1.622736923 | 0.108256159 | 1.326096079  | 0.190042805 | 0.333486656  | 0.740007211 |
| C2orf103 | 0.376141973  | 0.707725065 | 0.506358023  | 0.614538184 | 1.002418583  | 0.320435295 |
| C2orf106 | 1.273403785  | 0.206259328 | 1.727948478  | 0.089356065 | 3.400087472  | 0.001245223 |
| C2orf107 | -0.772335581 | 0.442004223 | 1.275310228  | 0.207319522 | 2.147034188  | 0.036116469 |
| C2orf108 | -3.446700894 | 0.000875392 | -0.04686148  | 0.962785737 | 0.191955538  | 0.84846848  |
| C2orf11  | -2.38848914  | 0.01907559  | 2.148991805  | 0.035850286 | 2.882199256  | 0.005583075 |
| C2orf111 | -3.665283461 | 0.000423831 | -1.120444982 | 0.267174443 | -1.369866912 | 0.17617325  |
| C2orf112 | 1.895343845  | 0.061360164 | -1.38412348  | 0.171660593 | 0.003843107  | 0.996947252 |
| C2orf118 | 1.04351315   | 0.299595383 | 1.419782918  | 0.161060995 | 1.595577306  | 0.116188173 |
| C2orf12  | 0.525883705  | 0.600304059 | -1.718369815 | 0.091100871 | -1.058760757 | 0.294235288 |
| C2orf132 | -0.990271189 | 0.324781853 | -0.057662944 | 0.954216697 | 0.653368874  | 0.516181057 |
| C2orf134 | -0.092756281 | 0.926309987 | -2.945386904 | 0.004647025 | -2.335021835 | 0.023136262 |
| C2orf165 | 2.818777557  | 0.005964817 | 1.460666304  | 0.149540901 | 1.570252622  | 0.121966328 |
| C2orf177 | -0.267242244 | 0.789913767 | 0.09995248   | 0.920729149 | -0.419325545 | 0.676575714 |
| C2orf194 | 2.893765256  | 0.004807657 | 0.70549896   | 0.483343431 | 0.873587091  | 0.386058341 |
| C2orf195 | 0.025663032  | 0.979584756 | 1.199365627  | 0.2352966   | 0.348487242  | 0.728775561 |
| C2orf196 | 0.784008893  | 0.435159662 | -1.132144666 | 0.262265037 | -0.843043961 | 0.402775332 |
| C2orf197 | 0.116457651  | 0.907557674 | -2.207970002 | 0.031242488 | -2.364935732 | 0.021508016 |
| C2orf20  | 1.195161208  | 0.235264815 | -0.249176283 | 0.804110881 | -0.582223878 | 0.562742922 |
| C2orf201 | 1.610940227  | 0.110807266 | -2.184837266 | 0.032983715 | -2.513821766 | 0.014832471 |
| C2orf24  | -0.880887058 | 0.380800074 | -3.557166826 | 0.000758016 | -3.318048658 | 0.001593786 |
| C2orf27  | -0.516030765 | 0.607139131 | 0.378632306  | 0.706353036 | 0.395420832  | 0.694028365 |
| C2orf29  | -1.417016754 | 0.160041433 | 1.253102964  | 0.215231616 | 2.813003746  | 0.006748413 |
| C2orf3   | -2.241407687 | 0.027538987 | -0.123903628 | 0.901822974 | 0.297495933  | 0.767184127 |
| C2orf30  | 0.265776766  | 0.791038579 | -2.678884982 | 0.009611907 | -2.371676174 | 0.021155577 |
| C2orf4   | -0.212423943 | 0.832272145 | 1.838984513  | 0.071074274 | 2.682903729  | 0.009566629 |
| C2orf43  | -3.068678929 | 0.002865085 | 1.425079703  | 0.15953077  | 1.44334081   | 0.154472078 |
| C2orf7   | 0.443941755  | 0.658184537 | -1.002975168 | 0.320068042 | -0.48146548  | 0.632053958 |
| C2orf72  | -0.615447744 | 0.539862248 | 1.030020945  | 0.307306242 | -0.447953948 | 0.655907417 |
| C2orf94  | 0.131448625  | 0.895723271 | 1.20410405   | 0.23347446  | 0.263578732  | 0.793067964 |
| C2orf96  | -0.095386595 | 0.924226654 | -0.015568031 | 0.987632812 | 0.625319699  | 0.534290639 |
| C2orf119 | -0.059757062 | 0.95248588  | -0.298162703 | 0.766651957 | -0.162195124 | 0.871733572 |
| C2orf122 | -1.409674953 | 0.162192788 | -0.866602969 | 0.389755458 | 1.298772713  | 0.199322241 |
| C2orf128 | 0.946870069  | 0.346321889 | -0.381878028 | 0.703957168 | 0.527878164  | 0.599660682 |
| C2orf15  | -2.148004026 | 0.034487213 | -1.778872878 | 0.080537808 | -1.674321749 | 0.099620751 |
| C2orf2   | 0.984193453  | 0.327743676 | 0.27452421   | 0.784642506 | 1.431641992  | 0.157780771 |
| C2orf33  | 0.178676846  | 0.858605981 | 2.445629514  | 0.017537899 | 3.701297365  | 0.000489846 |
| C2orf49  | 2.150840902  | 0.034255593 | -2.029689754 | 0.047016761 | -0.276767822 | 0.782973119 |
| C2orf56  | 0.689608679  | 0.492271655 | 1.915084152  | 0.060452011 | 2.982232065  | 0.004224742 |
| C2orf58  | 0.041910378  | 0.96666597  | 0.705202496  | 0.483526489 | 1.683664952  | 0.097790152 |
| C2orf59  | -0.852995871 | 0.39599883  | -0.790272867 | 0.432610224 | -0.010959914 | 0.991294218 |
| C2orf62  | -1.119492083 | 0.266004822 | 2.353844611  | 0.022014116 | 1.900000221  | 0.062564748 |
| C2orf63  | -1.381989328 | 0.170505506 | 0.569654297  | 0.571127407 | 1.06641708   | 0.290792088 |
| C2orf67  | 3.699690895  | 0.000377142 | -0.602241685 | 0.549376934 | 1.698660986  | 0.094909771 |
| C2orf7   | -5.682138501 | 1.73E-07    | -0.174340014 | 0.862209613 | -0.766743993 | 0.446440638 |
| C2orf70  | 0.546975895  | 0.58579255  | -1.300335364 | 0.198665329 | -0.483286298 | 0.630768801 |
| C2orf90  | -0.808518041 | 0.420993083 | -0.858617048 | 0.394111067 | -1.90260367  | 0.06221701  |
| C2orf91  | 0.01043973   | 0.991694303 | -1.196295133 | 0.236482848 | -2.060153579 | 0.044022247 |

|          |              |             |              |             |              |             |
|----------|--------------|-------------|--------------|-------------|--------------|-------------|
| C21orf96 | 0.138164307  | 0.89042916  | -1.107505139 | 0.272679365 | 0.320256887  | 0.749960523 |
| C22orf13 | -2.254827964 | 0.026648981 | 1.506443737  | 0.137418538 | 1.635323182  | 0.107566975 |
| C22orf23 | 0.039756194  | 0.968378394 | 1.103811752  | 0.274265131 | 1.444944402  | 0.154022794 |
| C22orf25 | -2.245197318 | 0.027285061 | 1.088796249  | 0.280778588 | 1.722017754  | 0.090562803 |
| C22orf26 | 0.13945113   | 0.88941529  | 0.699715697  | 0.486921387 | -0.012437299 | 0.990120745 |
| C22orf28 | 0.533922493  | 0.594753842 | 3.506464021  | 0.000887165 | 3.730148185  | 0.000447027 |
| C22orf29 | 3.492090124  | 0.000754744 | 1.737189486  | 0.087699031 | 2.92118257   | 0.005011602 |
| C22orf32 | -0.101438911 | 0.919434964 | 0.798479658  | 0.427872389 | 0.894189785  | 0.375031386 |
| C22orf34 | 0.464764136  | 0.643258954 | 1.776871539  | 0.080870147 | 1.487101078  | 0.142573776 |
| C22orf36 | -0.905069099 | 0.367922973 | -0.42185373  | 0.674702212 | -0.602472129 | 0.549281636 |
| C22orf39 | 2.66482022   | 0.009176756 | -0.427009119 | 0.670964707 | 0.310919278  | 0.757011539 |
| C22orf40 | 0.832281846  | 0.407523729 | 0.381801713  | 0.704013466 | 1.280266778  | 0.205707036 |
| C22orf43 | 1.302709894  | 0.196104133 | 1.016529244  | 0.313628596 | 0.970313414  | 0.336045201 |
| C22orf45 | 0.651280491  | 0.516578358 | 0.557465684  | 0.579369489 | 1.315357045  | 0.193727787 |
| C22orf46 | -0.244844839 | 0.807151903 | 0.305528604  | 0.761065093 | 1.137718088  | 0.26006232  |
| C2CD2    | 1.661761098  | 0.100152288 | -0.004574113 | 0.996366205 | 1.260716977  | 0.212616419 |
| C2CD2L   | 0.711622743  | 0.47859811  | -0.231332784 | 0.817876132 | 0.674306514  | 0.502879012 |
| C2CD3    | 0.129383113  | 0.89735252  | -0.06181996  | 0.950920235 | -0.368454423 | 0.713917832 |
| C2CD4D   | -0.342760529 | 0.732603609 | -2.455535263 | 0.017107406 | -2.730118277 | 0.008438245 |
| C2orf15  | 1.389447051  | 0.168234975 | -1.324608716 | 0.190532829 | 0.178473515  | 0.85899251  |
| C2orf16  | 0.791642755  | 0.43071745  | 1.764111015  | 0.083016102 | 0.620807694  | 0.537234222 |
| C2orf18  | -1.501113981 | 0.136938976 | 1.196710019  | 0.236322309 | 1.746850717  | 0.086122827 |
| C2orf28  | -0.285777155 | 0.775726657 | -2.410707704 | 0.019134358 | -1.665117184 | 0.101451541 |
| C2orf29  | 0.161739765  | 0.871885008 | 0.728658169  | 0.469163233 | 1.537775362  | 0.129711499 |
| C2orf3   | 2.300746892  | 0.023792034 | -0.44053459  | 0.661198967 | 0.869673075  | 0.388175957 |
| C2orf40  | -0.294013137 | 0.769446655 | 0.017522956  | 0.98607998  | -0.224044247 | 0.823534841 |
| C2orf42  | 0.063395692  | 0.949596533 | 1.453786786  | 0.151432961 | 2.566016645  | 0.012978446 |
| C2orf43  | 2.094791514  | 0.039090836 | 0.69851879   | 0.487663713 | -0.602519654 | 0.549250233 |
| C2orf44  | 0.94243828   | 0.348572351 | -0.232635356 | 0.816869263 | 1.322742343  | 0.19127491  |
| C2orf47  | 0.054739007  | 0.956471629 | -0.876997656 | 0.384131279 | -0.209534939 | 0.834787884 |
| C2orf49  | 1.034673325  | 0.303682798 | -2.270022642 | 0.026965332 | -3.614487143 | 0.000643651 |
| C2orf55  | -1.86560861  | 0.065459006 | -0.792119675 | 0.43154134  | -1.46651295  | 0.148078514 |
| C2orf56  | 2.261044069  | 0.026245374 | -1.170206654 | 0.246737151 | 0.141821022  | 0.887728227 |
| C2orf62  | -0.741907487 | 0.460137283 | -0.263124152 | 0.793393891 | -0.724360419 | 0.471847399 |
| C2orf63  | 1.641661837  | 0.104262516 | -0.963305179 | 0.339421482 | 0.585556717  | 0.56051601  |
| C2orf65  | -0.121540076 | 0.903542953 | 0.030996483  | 0.975379506 | -0.024916994 | 0.980209378 |
| C2orf67  | 0.221511334  | 0.825212287 | -1.58390902  | 0.118690359 | -2.493358439 | 0.015622512 |
| C2orf68  | 0.465470561  | 0.6427551   | -0.005936286 | 0.995284071 | 1.575637701  | 0.120718716 |
| C2orf69  | 0.511675117  | 0.61017191  | -1.035561783 | 0.304735002 | -2.017876066 | 0.048384707 |
| C2orf74  | 0.919212765  | 0.360520381 | 0.802656508  | 0.425473016 | 1.015646079  | 0.314147752 |
| C2orf76  | 2.189421269  | 0.031237405 | -1.853829583 | 0.068886822 | -1.331468524 | 0.188407014 |
| C2orf81  | 1.121167591  | 0.265295031 | 1.492666997  | 0.140982134 | 2.156414861  | 0.035342113 |
| C2orf85  | -0.783211676 | 0.435625115 | -1.846520774 | 0.069956593 | 0.028840352  | 0.977094024 |
| C2orf88  | -5.668837577 | 1.83E-07    | 0.315599665  | 0.753447129 | -0.701795237 | 0.485701253 |
| C2orf89  | 1.949668575  | 0.054429454 | 1.629854817  | 0.108589629 | 3.109607149  | 0.002939105 |
| C3       | 1.427765898  | 0.156931309 | 0.660794279  | 0.511378721 | -0.369228018 | 0.713344386 |
| C3AR1    | -1.444619305 | 0.152149105 | -0.463676985 | 0.644626766 | -0.801008176 | 0.426498236 |
| C3orf14  | -0.901362924 | 0.369878543 | 0.766286574  | 0.446635105 | 0.684687761  | 0.496353248 |
| C3orf17  | 1.696107062  | 0.093433563 | 0.546517881  | 0.586821022 | 1.410611249  | 0.163867042 |
| C3orf18  | 1.128754447  | 0.262097644 | 0.144126899  | 0.885903377 | 1.028679765  | 0.308034357 |
| C3orf19  | 0.702782418  | 0.484063581 | 1.619331309  | 0.110839283 | 2.787511106  | 0.007231598 |
| C3orf21  | -2.199593787 | 0.030481332 | -0.228333809 | 0.820195468 | -0.631459859 | 0.530298337 |
| C3orf23  | -1.247830673 | 0.215433983 | -1.132390136 | 0.262162722 | -1.376438065 | 0.174142    |
| C3orf25  | -0.131477888 | 0.895700192 | -1.701451125 | 0.094251335 | -1.37584904  | 0.174323341 |
| C3orf26  | 0.28050312   | 0.77975603  | 1.039702357  | 0.30282315  | 1.851073168  | 0.069412994 |
| C3orf33  | 1.727630948  | 0.087595061 | 1.339914209  | 0.18553576  | 1.769487865  | 0.082234235 |
| C3orf35  | 1.000504169  | 0.319835241 | -0.916884128 | 0.363026681 | -0.679147615 | 0.499830062 |
| C3orf37  | -0.523683343 | 0.601827397 | 2.315282354  | 0.024181286 | 3.421182009  | 0.001168048 |
| C3orf38  | -0.036134922 | 0.97125738  | -0.398833636 | 0.691490637 | -0.76976326  | 0.444661751 |
| C3orf39  | -1.988940788 | 0.049843112 | -0.758913843 | 0.450998765 | 0.238580035  | 0.8122985   |
| C3orf47  | 0.911245546  | 0.364678541 | -0.43513308  | 0.665092023 | -0.798102171 | 0.428168614 |
| C3orf52  | 0.448042592  | 0.65523381  | -1.008143483 | 0.31760222  | 0.064387617  | 0.948889921 |
| C3orf54  | -1.701593302 | 0.092395219 | 0.882026919  | 0.381428516 | 0.485935027  | 0.628901339 |
| C3orf58  | 0.200969349  | 0.841190624 | -0.646863755 | 0.520289771 | -2.282052373 | 0.026290653 |
| C3orf62  | -4.037362067 | 0.000115848 | 0.594825205  | 0.554290032 | 0.899395636  | 0.372277051 |
| C3orf63  | 1.236303036  | 0.219766935 | 0.138429781  | 0.890383616 | -0.536969668 | 0.593406779 |
| C3orf64  | 1.955167033  | 0.053766509 | 0.101940714  | 0.919157804 | -1.037917801 | 0.303750557 |
| C3orf71  | -0.982734903 | 0.328457107 | -1.554997055 | 0.125424916 | -2.167095905 | 0.03447816  |
| C3orf75  | 1.402804414  | 0.164226095 | 1.069492788  | 0.289309354 | 2.354947105  | 0.022039948 |
| C3orf78  | -0.415884245 | 0.678516564 | -2.992961187 | 0.004064284 | -2.304323565 | 0.024920592 |
| C4BPA    | -0.685669081 | 0.494740945 | -0.833579004 | 0.407961923 | -1.412875329 | 0.163203218 |
| C4orf10  | -0.465666343 | 0.642615488 | -0.386266118 | 0.700722839 | 0.334267976  | 0.739420767 |



|          |              |             |              |             |              |             |
|----------|--------------|-------------|--------------|-------------|--------------|-------------|
| C4orf14  | 1.219152631  | 0.226074322 | 1.10010242   | 0.275864238 | 0.408742937  | 0.684280701 |
| C4orf19  | -0.471055118 | 0.638777844 | -0.036755619 | 0.970806957 | 0.702551344  | 0.48523341  |
| C4orf21  | 2.128821377  | 0.03608941  | 0.271412024  | 0.787044586 | 0.691187075  | 0.492291432 |
| C4orf27  | 0.563305814  | 0.574672504 | 1.095705448  | 0.277768228 | 1.944224859  | 0.056876941 |
| C4orf29  | 0.08004263   | 0.936386788 | -0.673667768 | 0.503217107 | -1.637619204 | 0.107085275 |
| C4orf3   | -1.495911885 | 0.138287666 | -0.666214976 | 0.50793345  | -1.207988389 | 0.232107237 |
| C4orf32  | -0.527722585 | 0.599032341 | -1.141992493 | 0.258182546 | -2.333419282 | 0.023226514 |
| C4orf33  | -0.968237271 | 0.335604089 | -1.058473839 | 0.294258496 | -1.753406377 | 0.084981313 |
| C4orf34  | -0.331262525 | 0.74124106  | 0.895813778  | 0.374080974 | -0.849087124 | 0.399432857 |
| C4orf41  | 1.806268187  | 0.07432683  | 1.006618643  | 0.318328394 | -0.115284901 | 0.908629965 |
| C4orf42  | 2.794563824  | 0.006389823 | -3.19570849  | 0.002264732 | -2.664953579 | 0.01003071  |
| C4orf43  | 1.940495487  | 0.055550886 | -1.602082373 | 0.114608197 | -1.017630082 | 0.313211911 |
| C4orf44  | 0.635000743  | 0.527090853 | -0.908568704 | 0.367363967 | -0.806875014 | 0.42313788  |
| C4orf46  | 0.478696858  | 0.633352587 | -1.387882268 | 0.170518652 | -1.680234691 | 0.098459006 |
| C4orf48  | -0.938760125 | 0.350447279 | -1.465176335 | 0.148310594 | -1.885263469 | 0.064564366 |
| C4orf52  | -0.621728433 | 0.535742783 | -1.936015659 | 0.05777866  | -1.307091389 | 0.196501099 |
| C5       | -0.684781853 | 0.495297976 | 1.205440233  | 0.232962497 | 0.332541119  | 0.74071712  |
| C5AR1    | -4.353484618 | 3.63E-05    | -0.334651924 | 0.739103316 | -0.626116182 | 0.533771891 |
| C5orf13  | -0.689256737 | 0.492491974 | -0.524630121 | 0.601853817 | -0.095199705 | 0.924494619 |
| C5orf15  | 0.157764236  | 0.875007382 | -1.254811388 | 0.214615113 | -1.922214345 | 0.056950046 |
| C5orf20  | 1.615426192  | 0.109831516 | -0.104721151 | 0.916960909 | 0.517400173  | 0.609606099 |
| C5orf22  | -1.062878454 | 0.290772108 | -1.498806771 | 0.139385067 | -0.641995951 | 0.523484253 |
| C5orf24  | 1.3690104    | 0.174512571 | -1.891673274 | 0.063565948 | -2.55070946  | 0.013499094 |
| C5orf25  | -0.875477405 | 0.383719668 | 0.390535985  | 0.697580984 | 1.493606057  | 0.140868445 |
| C5orf28  | 0.599566654  | 0.550350009 | -0.691032302 | 0.492321047 | -1.202075223 | 0.234371758 |
| C5orf30  | 0.192619095  | 0.26824728  | 0.00649711   | 0.994838544 | -0.959078278 | 0.34162466  |
| C5orf32  | -1.232193034 | 0.22118958  | -1.065394284 | 0.291143429 | -1.611599931 | 0.112647887 |
| C5orf34  | 1.446181882  | 0.151711498 | -1.608821812 | 0.11312348  | -0.86292216  | 0.391845469 |
| C5orf35  | -0.110416602 | 0.912332752 | -0.548830037 | 0.585243481 | -0.383062622 | 0.703117508 |
| C5orf39  | 0.192677273  | 0.847659818 | -0.414618394 | 0.679961517 | 0.016127042  | 0.98719012  |
| C5orf4   | -3.184508124 | 0.00201145  | 1.840323482  | 0.070874605 | 1.014986779  | 0.314459156 |
| C5orf41  | -0.237435552 | 0.812875946 | -1.058007491 | 0.294469232 | -2.174547753 | 0.033886429 |
| C5orf42  | -0.497754895 | 0.619909915 | -0.646708653 | 0.520389447 | -0.578123511 | 0.565488679 |
| C5orf43  | -0.222105724 | 0.824751008 | 0.530308134  | 0.597936987 | 0.044737705  | 0.96447486  |
| C5orf44  | 0.313178788  | 0.754892772 | -1.059758721 | 0.293678411 | -1.188157023 | 0.23976524  |
| C5orf45  | 3.106185197  | 0.00255742  | 0.118896121  | 0.90577137  | 1.129715099  | 0.263391939 |
| C5orf51  | 0.124636915  | 0.901097913 | -2.447818009 | 0.017441959 | -1.764190546 | 0.083130855 |
| C5orf53  | 3.599724837  | 0.000528385 | -1.016359461 | 0.313708714 | -1.074954103 | 0.286985754 |
| C5orf54  | 0.165300873  | 0.869089841 | 0.299816746  | 0.765396307 | 0.169843265  | 0.865742917 |
| C5orf55  | 1.916767238  | 0.058542907 | 1.100491482  | 0.275696206 | 0.760119866  | 0.450357973 |
| C5orf56  | -0.859160346 | 0.392608066 | -4.271958455 | 7.35E-05    | -6.169539094 | 7.93E-08    |
| C5orf62  | -3.953605205 | 0.000156152 | 0.512079133  | 0.610553638 | -0.223593517 | 0.823883868 |
| C5orf63  | 2.336160993  | 0.021776817 | 0.252044227  | 0.801904104 | 0.851463736  | 0.39812306  |
| C6orf1   | -1.525241928 | 0.130818113 | -2.049640347 | 0.044962575 | -1.612693028 | 0.112409577 |
| C6orf105 | 0.676686194  | 0.500396401 | 2.355078226  | 0.021947743 | 2.845496452  | 0.006175736 |
| C6orf106 | -1.157545356 | 0.25021087  | 3.088985198  | 0.003089521 | 2.604275381  | 0.011755955 |
| C6orf108 | 1.488248517  | 0.140293404 | -1.598389068 | 0.115428493 | -0.502465601 | 0.617302011 |
| C6orf115 | 0.708604592  | 0.480460197 | -0.318556875 | 0.751214864 | 0.131716898  | 0.895678332 |
| C6orf120 | 1.110333315  | 0.269908229 | -1.597578758 | 0.115609098 | -1.571145492 | 0.121758756 |
| C6orf125 | -0.490130021 | 0.625272998 | -3.957992556 | 0.000210002 | -2.650246709 | 0.010426184 |
| C6orf130 | 1.025602317  | 0.307916122 | -1.021265958 | 0.311398987 | -0.197046642 | 0.844501473 |
| C6orf136 | 0.828856967  | 0.409448682 | -3.865124706 | 0.000284444 | -3.19230969  | 0.002311584 |
| C6orf138 | -1.152287403 | 0.252352627 | -0.705828025 | 0.483140288 | -0.018320762 | 0.985447811 |
| C6orf145 | -1.331296728 | 0.186561887 | -1.084107677 | 0.282834318 | -1.425825898 | 0.159446085 |
| C6orf147 | 0.262812079  | 0.793315446 | -0.725700537 | 0.470960917 | 0.026166954  | 0.979216808 |
| C6orf162 | 0.790090688  | 0.431618438 | -2.147439441 | 0.035979211 | -1.958099246 | 0.055186105 |
| C6orf163 | 0.606532626  | 0.545737187 | -0.891578563 | 0.376328463 | -0.121495331 | 0.903731802 |
| C6orf164 | 0.777083085  | 0.439213025 | -0.657319224 | 0.513593957 | 0.069143912  | 0.945120343 |
| C6orf170 | 1.446334511  | 0.151668806 | -0.373265978 | 0.710320803 | -0.926144012 | 0.3583287   |
| C6orf174 | 0.583635963  | 0.560972072 | -0.579046662 | 0.564815493 | -1.840089074 | 0.071034443 |
| C6orf192 | 2.993269849  | 0.003590261 | 2.07361402   | 0.042597287 | 3.495156966  | 0.000931747 |
| C6orf203 | -0.928837206 | 0.355537841 | -1.098863572 | 0.276399761 | 1.10118869   | 0.27550552  |
| C6orf204 | 1.120958443  | 0.265383559 | -1.247341811 | 0.217320244 | -1.864762881 | 0.067435939 |
| C6orf211 | 0.274116733  | 0.784643302 | -0.438120619 | 0.662937646 | -1.023059836 | 0.310660381 |
| C6orf226 | 0.198809721  | 0.84287446  | -1.781290082 | 0.08013793  | -0.345974632 | 0.730652786 |
| C6orf25  | -3.906683441 | 0.000184279 | 0.294876787  | 0.769148288 | -1.03207174  | 0.306456708 |
| C6orf27  | 0.287412139  | 0.774478766 | -0.6494275   | 0.518643653 | -0.421044425 | 0.675327481 |
| C6orf35  | 0.114688024  | 0.908956111 | -0.05120227  | 0.959341505 | 0.176891631  | 0.860229051 |
| C6orf47  | -1.511735284 | 0.134217378 | 1.448391113  | 0.152929976 | 1.638587773  | 0.106882598 |
| C6orf48  | 0.305393749  | 0.760794185 | -0.880574167 | 0.382208003 | -0.140825034 | 0.888511387 |
| C6orf57  | 1.135855922  | 0.259129444 | 0.331601275  | 0.741393946 | 0.482546366  | 0.631290917 |
| C6orf62  | -0.433233803 | 0.665914844 | 1.177044127  | 0.244019199 | 0.608589537  | 0.545247013 |

|          |              |             |              |             |              |             |
|----------|--------------|-------------|--------------|-------------|--------------|-------------|
| C6orf64  | 0.628108964  | 0.531574386 | -0.274324147 | 0.784817042 | 0.553010171  | 0.582448198 |
| C6orf70  | 1.940645359  | 0.055532408 | 0.41530897   | 0.679458848 | 0.893719598  | 0.37528079  |
| C6orf72  | -0.368388052 | 0.713476838 | 0.628870375  | 0.531920176 | 0.085906008  | 0.931846261 |
| C6orf81  | 0.340848083  | 0.734037912 | -0.126875762 | 0.899480631 | 1.484492863  | 0.143262093 |
| C6orf89  | -1.106135467 | 0.271710617 | 0.400408112  | 0.69033729  | 0.853452152  | 0.39702925  |
| C6orf97  | -0.206313182 | 0.837027292 | 1.087360131  | 0.281407153 | -1.882850916 | 0.064896829 |
| C7orf11  | 0.261222605  | 0.794536895 | -1.812955106 | 0.075050786 | -1.626036646 | 0.109533273 |
| C7orf13  | 2.583755339  | 0.011437754 | -0.644524258 | 0.521794313 | -1.407272368 | 0.164849805 |
| C7orf16  | -0.51945875  | 0.604757097 | -0.324698779 | 0.746585457 | -0.0896095   | 0.928915917 |
| C7orf23  | 1.280972089  | 0.203600261 | -0.960012596 | 0.341061743 | -0.98117061  | 0.330710963 |
| C7orf25  | -0.482811348 | 0.630439763 | 0.004437538  | 0.996474703 | -0.554580641 | 0.581380515 |
| C7orf26  | 1.18731596   | 0.238327726 | 1.405190996  | 0.165335412 | 2.204129649  | 0.031624473 |
| C7orf28B | -1.46224676  | 0.147268826 | -0.847768179 | 0.400076373 | -0.664919787 | 0.508819466 |
| C7orf29  | 0.780883694  | 0.436985975 | 0.362131799  | 0.718578858 | 1.747327071  | 0.086039455 |
| C7orf30  | -0.374131594 | 0.70921473  | -1.26427518  | 0.21122365  | -0.294496035 | 0.769463249 |
| C7orf31  | -1.069902768 | 0.287616056 | -1.187894472 | 0.239750502 | -1.195674518 | 0.236841056 |
| C7orf34  | 0.163871833  | 0.870211318 | -0.045519878 | 0.963850389 | -0.938822877 | 0.351836564 |
| C7orf36  | 0.022490962  | 0.982107714 | -0.803188851 | 0.425167794 | -1.041832255 | 0.301947689 |
| C7orf40  | 0.996325062  | 0.32184933  | -0.213501487 | 0.831689785 | 0.606703853  | 0.546489069 |
| C7orf41  | -5.756205242 | 1.26E-07    | 0.466679186  | 0.642489887 | -1.139403824 | 0.259364806 |
| C7orf42  | -1.043583796 | 0.299562868 | 1.433321643  | 0.157172171 | 1.916726812  | 0.060359093 |
| C7orf43  | -1.949264033 | 0.054478503 | -4.664599685 | 1.88E-05    | -3.128409917 | 0.002783789 |
| C7orf44  | -0.977775359 | 0.330890662 | -2.728744121 | 0.008416356 | -1.994576325 | 0.050944663 |
| C7orf46  | 0.771765889  | 0.442339854 | -1.770555275 | 0.081926515 | -0.518749921 | 0.605970513 |
| C7orf47  | 0.611518184  | 0.542447821 | -2.839190576 | 0.006238524 | -2.536894297 | 0.013985185 |
| C7orf49  | -1.892029687 | 0.061806029 | 0.720556737  | 0.474096651 | 0.256417176  | 0.798564449 |
| C7orf50  | -0.033949995 | 0.972994628 | 0.549809911  | 0.584575542 | 0.839724087  | 0.40461886  |
| C7orf51  | 0.43787874   | 0.662557063 | -1.412269866 | 0.163250977 | -1.624521271 | 0.109856885 |
| C7orf53  | -1.929616599 | 0.056906182 | 0.235268726  | 0.814834654 | -0.366684179 | 0.715230693 |
| C7orf54  | 0.900787191  | 0.370182918 | -0.10313138  | 0.918216949 | -0.286011279 | 0.77592042  |
| C7orf55  | -1.497502919 | 0.137874075 | -2.748380086 | 0.007984183 | -1.720402251 | 0.09085808  |
| C7orf58  | 1.93135426   | 0.056687844 | -0.349420426 | 0.728048045 | -0.345198988 | 0.731232621 |
| C7orf59  | -1.347956781 | 0.181164109 | 0.649577906  | 0.518547167 | 0.491094416  | 0.625270758 |
| C7orf60  | -1.262586969 | 0.210104146 | -1.343478957 | 0.184386315 | -1.706889874 | 0.093359087 |
| C7orf61  | -0.23840785  | 0.81212421  | 1.75317686   | 0.084892386 | 1.917294148  | 0.060285456 |
| C7orf64  | 0.589961548  | 0.556742314 | -1.662289281 | 0.101888321 | -2.090414352 | 0.041112958 |
| C7orf68  | 1.442778236  | 0.152665958 | -0.454622952 | 0.651089369 | 0.476120076  | 0.635833404 |
| C7orf70  | 1.554104299  | 0.123782075 | -0.448001954 | 0.655832446 | -0.516274597 | 0.607686807 |
| C7orf73  | -3.271786073 | 0.001532139 | -0.992928221 | 0.324898145 | -0.827525354 | 0.411437209 |
| C7orf74  | -0.540737399 | 0.590067389 | -0.998929141 | 0.322007358 | -1.132883057 | 0.00274799  |
| C8G      | -0.541925766 | 0.589251951 | -1.121539849 | 0.266712284 | -1.320065611 | 0.192161208 |
| C8ORFK29 | -0.077442819 | 0.938448721 | -1.597532387 | 0.115619441 | -0.726406832 | 0.47060216  |
| C8orf31  | 0.141361682  | 0.887910332 | 0.76475225   | 0.44754118  | 0.551281333  | 0.583624633 |
| C8orf33  | 1.389301855  | 0.168278959 | 0.935721109  | 0.353323623 | 0.2018342576 | 0.048334605 |
| C8orf37  | 0.101178064  | 0.91964142  | -1.103749622 | 0.274291862 | -2.01498162  | 0.048696566 |
| C8orf38  | 0.815332513  | 0.417103695 | -0.987654526 | 0.327452877 | -0.224659074 | 0.823058802 |
| C8orf39  | -0.084666601 | 0.932720556 | -1.747769491 | 0.085833211 | -3.449450401 | 0.001071718 |
| C8orf40  | 1.269800035  | 0.207534458 | -1.520978799 | 0.133736455 | -0.752802629 | 0.45470835  |
| C8orf41  | -0.857479352 | 0.393530915 | 0.909730035  | 0.366756239 | 1.647765749  | 0.104977524 |
| C8orf44  | 0.854801158  | 0.395003975 | 0.938900424  | 0.351702684 | 0.925248576  | 0.35879011  |
| C8orf45  | 0.999438758  | 0.32034791  | -1.007299503 | 0.31800401  | 0.423136907  | 0.673809178 |
| C8orf46  | 2.453588228  | 0.01613357  | -0.889973924 | 0.377182221 | 0.132899456  | 0.894747303 |
| C8orf55  | -0.175264093 | 0.861278507 | 0.010414235  | 0.991726781 | 0.494451525  | 0.622913409 |
| C8orf58  | 1.051181155  | 0.296080169 | 0.85937538   | 0.39369617  | 1.700739909  | 0.094516024 |
| C8orf59  | 1.261541189  | 0.210478646 | -0.958679589 | 0.341727284 | 0.382245047  | 0.703720371 |
| C8orf73  | 0.811896393  | 0.419062175 | 0.548907057  | 0.585190967 | 0.022704845  | 0.981966082 |
| C8orf76  | 0.237771213  | 0.812616409 | -0.48005561  | 0.633006003 | -0.272141104 | 0.786510206 |
| C8orf77  | 1.317987964  | 0.19096002  | -1.991870114 | 0.051133773 | -1.060959198 | 0.293243745 |
| C8orf80  | 1.397748746  | 0.165734732 | 0.51923437   | 0.6055869   | 1.227551782  | 0.224728935 |
| C8orf82  | -0.005037244 | 0.995992386 | -3.311889748 | 0.001604275 | -3.637031621 | 0.000599777 |
| C8orf83  | -1.464058093 | 0.146774323 | -0.618878452 | 0.538436565 | -1.076127984 | 0.286465078 |
| C8orf84  | 1.473554437  | 0.144202886 | -2.257084123 | 0.027811757 | -0.973886192 | 0.33428362  |
| C9orf100 | -0.627414992 | 0.532026946 | 0.178452593  | 0.858993755 | -0.309462795 | 0.758113251 |
| C9orf102 | 1.166860746  | 0.246448143 | 0.409986237  | 0.683337023 | -0.5667968   | 0.57310763  |
| C9orf103 | -0.35335278  | 0.724676915 | 0.537501235  | 0.592992145 | 1.424390058  | 0.159859301 |
| C9orf106 | 0.174302356  | 0.862031936 | -0.234598695 | 0.815352216 | 0.60854092   | 0.545279018 |
| C9orf114 | 0.019360536  | 0.984597729 | 0.148509967  | 0.882459052 | -0.012447893 | 0.99011233  |
| C9orf117 | 0.035367693  | 0.971867393 | -0.817470556 | 0.417028387 | 0.506540918  | 0.614457251 |
| C9orf123 | 1.396387487  | 0.166142745 | -1.547038241 | 0.127331486 | -1.474235275 | 0.14599453  |
| C9orf130 | 0.796206251  | 0.428074743 | -0.288224102 | 0.774209877 | 0.742656118  | 0.460780884 |
| C9orf131 | 0.85856544   | 0.39293451  | 0.248783961  | 0.804412883 | 0.946724555  | 0.347829487 |
| C9orf139 | 0.898069189  | 0.371621993 | -0.321639178 | 0.748890444 | -0.185088339 | 0.853825657 |

|          |              |             |              |             |              |             |
|----------|--------------|-------------|--------------|-------------|--------------|-------------|
| C9orf140 | -1.869491004 | 0.064911133 | -0.296030189 | 0.76827176  | -0.466292299 | 0.642807507 |
| C9orf142 | 0.597417609  | 0.551777025 | -0.031503499 | 0.974976917 | 0.726041561  | 0.47082429  |
| C9orf156 | 0.5770516    | 0.565391609 | 0.099942651  | 0.920736918 | 1.306789399  | 0.196602986 |
| C9orf16  | -1.599526421 | 0.113321317 | -0.226658205 | 0.821492045 | -0.10214624  | 0.919003951 |
| C9orf163 | 0.631205956  | 0.529557169 | -1.487643602 | 0.142299518 | -1.466435708 | 0.148099476 |
| C9orf167 | 0.648754041  | 0.518202514 | -0.511034243 | 0.611280488 | -0.658207042 | 0.513090723 |
| C9orf172 | 0.710918015  | 0.479032542 | -4.71335955  | 1.59E-05    | -3.825227132 | 0.000329871 |
| C9orf21  | -2.412479652 | 0.017939999 | -0.850120442 | 0.398778261 | -1.18850852  | 0.239627933 |
| C9orf23  | -1.326720008 | 0.188065681 | 0.904208318  | 0.369651512 | 0.880502559  | 0.382334581 |
| C9orf25  | 0.530777639  | 0.596922303 | -2.77422501  | 0.007446425 | -1.860352448 | 0.06806763  |
| C9orf3   | -0.158810503 | 0.874185451 | -0.619087051 | 0.538300105 | -0.868384259 | 0.388874838 |
| C9orf30  | -0.125230064 | 0.900629714 | -0.056134282 | 0.955429112 | -0.127613667 | 0.89890995  |
| C9orf37  | 1.413361626  | 0.161109729 | 0.141143039  | 0.88824944  | 1.143663867  | 0.257608041 |
| C9orf40  | 0.539787108  | 0.590719843 | -0.977395129 | 0.332461066 | -1.287101133 | 0.203331543 |
| C9orf41  | 1.22426831   | 0.224148809 | -1.510153524 | 0.136471217 | -1.819507651 | 0.07415851  |
| C9orf43  | -0.252039367 | 0.801603803 | 0.30950219   | 0.758056501 | 0.787925976  | 0.434048646 |
| C9orf46  | -1.591469944 | 0.115123236 | -3.167366588 | 0.002460866 | -1.544160064 | 0.128158662 |
| C9orf47  | 0.239878601  | 0.810987428 | -0.050179799 | 0.960152725 | -0.345969701 | 0.730656472 |
| C9orf5   | 1.917921023  | 0.058394332 | 0.143288594  | 0.886562393 | -0.606457924 | 0.546651163 |
| C9orf6   | 0.31267601   | 0.755273465 | -1.897662814 | 0.06275659  | -1.900338339 | 0.062519494 |
| C9orf64  | -0.203052186 | 0.83956736  | 0.070279533  | 0.944214622 | -0.443587832 | 0.659042615 |
| C9orf66  | -1.896610453 | 0.06119048  | -3.534731764 | 0.000812784 | -5.259675415 | 2.32E-06    |
| C9orf68  | 2.140718106  | 0.035088327 | -0.404172449 | 0.687582802 | -0.409906757 | 0.683431675 |
| C9orf69  | -0.502992115 | 0.616238085 | -1.04362641  | 0.301018843 | -1.461051508 | 0.149566402 |
| C9orf7   | 0.901341834  | 0.36988969  | 1.951553287  | 0.05586001  | 1.881646937  | 0.065063285 |
| C9orf71  | -2.016174655 | 0.046859801 | -1.086578778 | 0.281749549 | -3.248498528 | 0.001959634 |
| C9orf72  | 0.003712152  | 0.997046618 | -0.922989055 | 0.359863405 | -1.648395276 | 0.104847874 |
| C9orf78  | -3.872469602 | 0.000207776 | 0.863220567  | 0.391596578 | 0.031104541  | 0.975296297 |
| C9orf80  | 0.009475593  | 0.992461331 | -0.703445364 | 0.484612258 | -0.606709462 | 0.546485372 |
| C9orf82  | 1.090178318  | 0.278638402 | 0.912755362  | 0.365176099 | -0.124200093 | 0.901599723 |
| C9orf84  | -0.795914415 | 0.428243456 | -0.375072568 | 0.708984137 | -0.479539755 | 0.633414404 |
| C9orf85  | 0.249221314  | 0.803775765 | -0.923823631 | 0.359432353 | 0.101030581  | 0.919885528 |
| C9orf86  | -0.293339687 | 0.769959595 | 0.579698697  | 0.56437859  | 1.564992835  | 0.123194884 |
| C9orf89  | -2.320483247 | 0.02264953  | -0.609990053 | 0.54426762  | -1.341159974 | 0.185260185 |
| C9orf9   | 0.426460489  | 0.670823426 | -2.156202484 | 0.03525672  | -1.741136748 | 0.087128127 |
| C9orf91  | -0.969077651 | 0.335187041 | 1.609116187  | 0.113058985 | 1.179549239  | 0.243145522 |
| C9orf93  | 2.000265469  | 0.04858343  | 1.169265434  | 0.247112991 | 0.116083276  | 0.908000083 |
| C9orf95  | 1.261847783  | 0.210368802 | -1.51300791  | 0.135745856 | -0.137510794 | 0.891118222 |
| C9orf96  | 0.296201254  | 0.767780763 | 0.564301401  | 0.574740041 | 0.431399249  | 0.667827402 |
| CA1      | -2.709722911 | 0.008106868 | -0.445358573 | 0.657730082 | -0.925923852 | 0.358442111 |
| CA11     | 0.922781746  | 0.358667555 | -0.367140909 | 0.714859431 | 0.81472761   | 0.418665133 |
| CA13     | -0.067150021 | 0.946616019 | -0.631763563 | 0.530041021 | -2.261705242 | 0.027600347 |
| CA14     | 0.607029505  | 0.545408904 | -0.757412608 | 0.451890318 | 0.860030928  | 0.39342361  |
| CA2      | -4.064993643 | 0.000104897 | 1.090260068  | 0.280138907 | 0.517351129  | 0.606940107 |
| CA4      | -2.223148508 | 0.02879173  | 1.047212319  | 0.299376456 | 1.040929595  | 0.302362774 |
| CA5B     | 0.685539736  | 0.49482213  | -1.37673257  | 0.173923111 | -0.558671615 | 0.578603691 |
| CA5BP1   | 0.801735952  | 0.424885407 | 0.395941732  | 0.69361095  | 1.471685936  | 0.146679944 |
| CA6      | 1.52102807   | 0.131871262 | 1.502277795  | 0.138488535 | 1.184728204  | 0.241107641 |
| CA8      | -2.852165279 | 0.005421224 | 0.85377164   | 0.396768484 | -2.913652266 | 0.005117574 |
| CAB39    | -1.567395491 | 0.120644628 | 0.997830668  | 0.322535227 | -0.135947262 | 0.892348449 |
| CAB39L   | 0.135964334  | 0.892162909 | -1.559199511 | 0.124427447 | 0.106329244  | 0.915699522 |
| CABIN1   | 0.639074218  | 0.524450064 | -1.816248514 | 0.074537568 | -0.404517416 | 0.687366729 |
| CABLES1  | -1.07874923  | 0.283674868 | 2.233905031  | 0.029387025 | 1.060896191  | 0.293272131 |
| CABLES2  | 0.115875143  | 0.908017965 | -1.088321366 | 0.280986328 | -0.32800989  | 0.744122303 |
| CABP4    | 1.541979551  | 0.126700359 | 0.684680819  | 0.496291413 | 1.611343556  | 0.112703839 |
| CABP5    | -3.658056062 | 0.000434312 | 1.154057241  | 0.253242908 | 0.378378662  | 0.706573946 |
| CABP7    | -1.370457421 | 0.174062312 | -1.645474165 | 0.105319103 | -0.328930078 | 0.74343037  |
| CABYR    | 0.69024892   | 0.491870996 | 0.372647058  | 0.710778943 | 1.525296215  | 0.132789861 |
| CACHD1   | 0.696695365  | 0.487846789 | -0.927929444 | 0.35731658  | 0.28468316   | 0.776932615 |
| CACNA1A  | -2.366164212 | 0.020189305 | -1.791092154 | 0.078533305 | -1.784776443 | 0.079691557 |
| CACNA1C  | 1.901944869  | 0.060480176 | -1.293489832 | 0.201005276 | -0.887788193 | 0.378436049 |
| CACNA1D  | 0.848746297  | 0.398346749 | -0.35247559  | 0.725768179 | -1.391392358 | 0.169586385 |
| CACNA1E  | -2.467644063 | 0.015554297 | -0.106427007 | 0.915613388 | -1.688045972 | 0.096941339 |
| CACNA1F  | 2.358540504  | 0.020582639 | 0.871634241  | 0.387026833 | 1.875582325  | 0.065907258 |
| CACNA1H  | 1.777432788  | 0.078984086 | -0.245402239 | 0.807017308 | -0.083503761 | 0.933747521 |
| CACNA1I  | 4.00259195   | 0.000131193 | 1.723092881  | 0.090237057 | 2.034949469  | 0.046579983 |
| CACNA2D2 | 1.308619635  | 0.19410221  | -3.551661713 | 0.00077112  | -1.624484627 | 0.10986472  |
| CACNA2D3 | -1.258973774 | 0.211400136 | 0.007729565  | 0.993859471 | 0.502136909  | 0.617531712 |
| CACNA2D4 | -0.045302676 | 0.963969653 | 0.2459348    | 0.806607011 | -0.047544864 | 0.96224742  |
| CACNB1   | 1.493388483  | 0.138945621 | -2.144722798 | 0.036205806 | -0.349427285 | 0.728073663 |
| CACNB2   | 0.6903786    | 0.491789865 | 0.008100164  | 0.993565066 | 0.157702254  | 0.875256308 |
| CACNB3   | 1.595887694  | 0.114132339 | -0.573174306 | 0.568757835 | -0.525950909 | 0.600990338 |

|           |              |             |              |             |              |             |
|-----------|--------------|-------------|--------------|-------------|--------------|-------------|
| CACNB4    | 0.697194731  | 0.487535814 | -1.787644334 | 0.079094636 | -1.699242627 | 0.094799473 |
| CACNG6    | -1.972027109 | 0.051776299 | -0.115133619 | 0.908739664 | -1.174447266 | 0.245165234 |
| CACNG8    | 0.263179475  | 0.79303319  | 0.239627893  | 0.81146947  | -0.385606907 | 0.701242634 |
| CACYBP    | 0.885233777  | 0.378465427 | 1.038652469  | 0.303307144 | 1.454888579  | 0.151259436 |
| CAD       | 1.194525361  | 0.235512    | 0.813958545  | 0.419021157 | 1.621888851  | 0.11042089  |
| CADM1     | -0.17662582  | 0.860211943 | 1.418393851  | 0.16146417  | 1.276589569  | 0.206993702 |
| CADM2     | -0.958978902 | 0.340221143 | -0.542716693 | 0.589418887 | -0.662832303 | 0.510145659 |
| CADM4     | -2.647832329 | 0.009613878 | 0.239977507  | 0.81119973  | -0.531499461 | 0.597165977 |
| CALCOCO1  | -1.0485761   | 0.297271231 | -0.22937017  | 0.819393787 | 0.129874234  | 0.897129359 |
| CALCOCO2  | -2.086171315 | 0.039884532 | 1.828301808  | 0.072684303 | 1.494699097  | 0.140583482 |
| CALCRL    | 0.749560773  | 0.455536991 | -2.084186057 | 0.041589015 | -2.111906091 | 0.03914965  |
| CALD1     | -1.131957419 | 0.260755954 | 1.856085017  | 0.068559497 | 1.83899822   | 0.071197199 |
| CALHM1    | 0.703744238  | 0.483467278 | -0.429193459 | 0.669383634 | -0.075608696 | 0.93999875  |
| CALHM2    | 1.67417732   | 0.097679557 | -1.527584695 | 0.132089114 | -2.576285674 | 0.012639454 |
| CALM1     | 0.393020665  | 0.695263526 | -0.444160347 | 0.658591014 | 0.841356513  | 0.403711726 |
| CALM2     | -1.820575162 | 0.072102186 | -0.090724408 | 0.928026356 | 0.099421231  | 0.921157539 |
| CALM3     | -2.808194347 | 0.006147284 | -0.282336633 | 0.778697501 | 0.398792964  | 0.691556009 |
| CALML4    | -0.241191702 | 0.809972841 | -1.371027837 | 0.17568503  | -1.032909602 | 0.306067856 |
| CALML6    | -0.432196976 | 0.66666529  | 1.785829533  | 0.079391443 | 1.317985034  | 0.19285225  |
| CALR      | -0.389958006 | 0.697518598 | 1.145989803  | 0.256538398 | 1.740680751  | 0.087208771 |
| CALU      | 1.279885064  | 0.20398061  | -1.719151997 | 0.090957346 | -1.622674698 | 0.110252274 |
| CALY      | -0.349845335 | 0.727298432 | -2.536172535 | 0.013942093 | -2.040288185 | 0.046027731 |
| CAMK1     | 0.189190235  | 0.850383434 | 0.236240789  | 0.814083936 | 0.268549025  | 0.789259448 |
| CAMK1D    | -0.399854573 | 0.690241541 | -2.187862919 | 0.032751227 | -3.425132477 | 0.001154108 |
| CAMK2D    | 0.875148162  | 0.383897768 | -0.233113602 | 0.816499663 | -0.149880826 | 0.881394894 |
| CAMK2G    | -0.224825543 | 0.822641069 | -0.686649059 | 0.495059179 | -0.786120131 | 0.435097088 |
| CAMK2N1   | 1.510765958  | 0.13446398  | -1.161917216 | 0.250061373 | -0.808578675 | 0.422165062 |
| CAMK4     | 2.664089669  | 0.009195176 | -0.857214154 | 0.394879332 | 0.479974394  | 0.633107238 |
| CAMKK1    | -4.087140482 | 9.68E-05    | -0.102458933 | 0.918748297 | 1.309121038  | 0.195817356 |
| CAMKK2    | -1.910452137 | 0.059361779 | 0.588740749  | 0.558337131 | 0.739505006  | 0.462676211 |
| CAMKMT    | 2.033027741  | 0.045091264 | 0.198506632  | 0.843347721 | 0.996333874  | 0.323355771 |
| CAMLG     | -0.258930012 | 0.796299566 | -0.193963501 | 0.846886926 | -0.513276988 | 0.609768209 |
| CAMP      | -2.908734951 | 0.00460298  | 0.288730124  | 0.773824528 | 0.443979943  | 0.658760797 |
| CAMSAP1   | 1.706494911  | 0.091475515 | -0.020541902 | 0.983682085 | 0.178041305  | 0.859330329 |
| CAMSAP1L1 | 0.862790966  | 0.39061945  | 1.045040678  | 0.300370358 | 0.268166152  | 0.789552644 |
| CAMTA1    | 0.697999809  | 0.487034691 | -2.194928318 | 0.03221393  | -1.295605755 | 0.200404214 |
| CAMTA2    | -0.745813342 | 0.457786227 | -0.937760306 | 0.352283404 | 0.092911467  | 0.926304107 |
| CAND1     | 2.339631185  | 0.021587718 | 1.409498821  | 0.164064501 | 1.736250399  | 0.087995514 |
| CAND2     | 1.899353888  | 0.060824305 | -0.327721144 | 0.744310804 | 1.302724244  | 0.197978377 |
| CANT1     | -2.238216825 | 0.027754398 | -0.109251114 | 0.913383068 | -0.242247461 | 0.809469694 |
| CANX      | 1.57739599   | 0.118325966 | 1.759449657  | 0.083811725 | 1.245869777  | 0.217977696 |
| CAP1      | -1.418208867 | 0.159694191 | 0.325495118  | 0.745985906 | 0.618362998  | 0.538832603 |
| CAPG      | -1.520828612 | 0.131921276 | 1.662581738  | 0.101829469 | 1.637546864  | 0.107100424 |
| CAPN1     | -2.020464307 | 0.046404109 | 1.790955748  | 0.078555449 | 1.30110644   | 0.198527746 |
| CAPN10    | 1.319147306  | 0.190573833 | -1.023045542 | 0.310564101 | -1.078615197 | 0.285364039 |
| CAPN12    | 0.71012145   | 0.479523851 | -0.522012306 | 0.603663638 | -0.049928736 | 0.960356091 |
| CAPN14    | 0.55671518   | 0.579148236 | -1.024413614 | 0.309923306 | 0.455350253  | 0.650610518 |
| CAPN2     | 0.55574839   | 0.579806185 | 2.349724122  | 0.022237112 | 1.332714491  | 0.188000193 |
| CAPN3     | 0.42620695   | 0.671007444 | 0.706277394  | 0.482862955 | 1.006385286  | 0.31854096  |
| CAPN5     | -0.496234645 | 0.62097758  | -0.645828173 | 0.520955475 | 0.5449807    | 0.587921663 |
| CAPN7     | 1.243458533  | 0.217032029 | -1.411030532 | 0.163614434 | -2.030032651 | 0.047093648 |
| CAPNS1    | -2.387395913 | 0.019128828 | 0.552050417  | 0.583049651 | 1.059901797  | 0.293720368 |
| CAPRIN1   | -0.031178524 | 0.975198428 | -0.326632546 | 0.745129828 | -1.063068303 | 0.292294661 |
| CAPRIN2   | 1.677161818  | 0.097092642 | -2.095986589 | 0.040488129 | -1.759118424 | 0.083996965 |
| CAPS      | 0.933867117  | 0.35295154  | 1.30274712   | 0.197845827 | 2.288715434  | 0.025873915 |
| CAPZA1    | -0.310240907 | 0.757118131 | -0.631684399 | 0.530092392 | -0.754932919 | 0.453439308 |
| CAPZA2    | -0.581229356 | 0.562585454 | -0.423399824 | 0.673580469 | -0.936766465 | 0.35288431  |
| CAPZB     | -2.23568499  | 0.027926369 | 1.317980008  | 0.192728325 | 1.587811158  | 0.117936166 |
| CARD11    | 1.602239196  | 0.112719687 | 0.109567249  | 0.913133446 | 0.759010411  | 0.451016025 |
| CARD14    | 2.430171687  | 0.017141549 | 0.121220088  | 0.903938629 | -0.56092464  | 0.577077147 |
| CARD16    | -0.815548045 | 0.416981032 | -1.367184292 | 0.1768798   | -2.29514045  | 0.025477631 |
| CARD17    | -1.272786242 | 0.206477424 | -0.783380352 | 0.436613294 | -1.934733487 | 0.058058959 |
| CARD6     | -2.132381751 | 0.035787247 | 1.927438862  | 0.058861637 | 1.071788459  | 0.288393146 |
| CARD8     | 0.008399506  | 0.993317432 | -1.106118742 | 0.273273862 | -2.016594904 | 0.048522531 |
| CARD9     | 0.180341219  | 0.857303207 | 0.842475947  | 0.403006444 | 0.223237616  | 0.82415949  |
| CARHSP1   | -1.793171062 | 0.07641309  | -1.065494582 | 0.29109845  | -1.103531131 | 0.274496337 |
| CARKD     | 1.705389476  | 0.091682275 | 0.815897872  | 0.417920043 | 2.516482449  | 0.014732448 |
| CARM1     | -1.169428225 | 0.245418199 | -0.235647602 | 0.814542029 | -0.668661533 | 0.506446959 |
| CARN51    | 1.190881267  | 0.236932241 | -0.453785076 | 0.651688803 | 1.159125091  | 0.251303376 |
| CARS      | -0.94707326  | 0.346218935 | 2.106401947  | 0.039537618 | 2.360376781  | 0.021749358 |
| CARS2     | -3.439955683 | 0.000894803 | -0.036309337 | 0.971161256 | 0.392897806  | 0.69588037  |
| CASC1     | -1.774039001 | 0.079547775 | 0.139021833  | 0.889917853 | 0.176359048  | 0.860645445 |

|            |              |             |              |             |              |             |
|------------|--------------|-------------|--------------|-------------|--------------|-------------|
| CASC3      | -2.65537723  | 0.009417458 | -0.783164945 | 0.436738752 | -1.139911241 | 0.25915511  |
| CASC4      | -0.102768313 | 0.918382853 | -0.747056011 | 0.458068688 | -1.828442369 | 0.072788414 |
| CASC5      | 1.016234274  | 0.312329574 | 1.346253075  | 0.183495557 | -0.212594441 | 0.832412037 |
| CASD1      | 1.701320289  | 0.092446553 | -1.089917046 | 0.280288715 | -1.879968148 | 0.06529599  |
| CASK       | 1.151356118  | 0.252733324 | -0.537608447 | 0.592918589 | -0.953133359 | 0.344601446 |
| CASKIN2    | -0.198484436 | 0.843128145 | 0.543587083  | 0.588823552 | -0.53509044  | 0.594696954 |
| CASP1      | 0.344960824  | 0.730954599 | 0.244964277  | 0.807354764 | -0.834665967 | 0.40743758  |
| CASP10     | -0.667834369 | 0.506003284 | 1.769287083  | 0.082139994 | 1.867420442  | 0.067057703 |
| CASP2      | 1.907872005  | 0.059699114 | 0.242358254  | 0.809363506 | 1.749152734  | 0.085720544 |
| CASP3      | 0.42968314   | 0.66848619  | -0.271103266 | 0.787280867 | -0.95496868  | 0.343680641 |
| CASP4      | -1.398273408 | 0.165577678 | -1.043438709 | 0.301104982 | -1.934962482 | 0.058030196 |
| CASP5      | 0.016574343  | 0.986814062 | -1.283336297 | 0.20451388  | -2.142916268 | 0.03646106  |
| CASP6      | 1.831842908  | 0.070389419 | 1.59523646   | 0.116132441 | 2.005259567  | 0.049756774 |
| CASP7      | 0.288810905  | 0.773411638 | 0.230829218  | 0.818265465 | -0.475600926 | 0.636200988 |
| CASP8      | -2.224025986 | 0.028730404 | -0.765198509 | 0.447277537 | -1.072270365 | 0.288178591 |
| CASP8AP2   | 1.449607789  | 0.15075547  | -0.147180828 | 0.883503285 | -1.222628164 | 0.226569467 |
| CASP9      | -3.214092172 | 0.00183516  | 1.707740946  | 0.093069781 | 1.927386417  | 0.058988268 |
| CASQ1      | 1.507884393  | 0.13519917  | 0.265760464  | 0.791372675 | -1.847620981 | 0.069919202 |
| CASS4      | -1.965161238 | 0.052579068 | -0.589407537 | 0.557892896 | -1.759838999 | 0.083873465 |
| CAST       | -0.433641326 | 0.665619974 | 2.327458937  | 0.023477301 | 1.454196601  | 0.151450464 |
| CASZ1      | -1.061909947 | 0.291209114 | -1.358950446 | 0.179460194 | -1.610575756 | 0.112871541 |
| CAT        | 0.901690947  | 0.369705197 | -0.098233946 | 0.922087601 | -0.365586902 | 0.716044897 |
| CATSPER1   | -0.580560749 | 0.56303409  | -1.285632091 | 0.203716584 | -0.602416379 | 0.549318474 |
| CATSPER2   | 0.979886824  | 0.329853159 | -1.434112873 | 0.156947179 | -0.16026352  | 0.987270092 |
| CATSPER2P1 | 0.180613631  | 0.857090015 | -1.582628132 | 0.118982435 | -0.017437647 | 0.862195849 |
| CATSPERB   | 0.181620558  | 0.856302083 | -0.926104244 | 0.358256131 | -2.006674026 | 0.049601299 |
| CATSPERG   | 0.938222948  | 0.350721647 | -0.586040667 | 0.560137812 | -0.804103183 | 0.424723518 |
| CAV1       | 0.897077318  | 0.372148027 | 0.536913584  | 0.593395399 | 0.849288224  | 0.399321924 |
| CAV2       | -3.04177361  | 0.003106591 | 0.684665317  | 0.496301125 | -1.530774812 | 0.131431318 |
| CBFA2T2    | 2.518187543  | 0.013622053 | 0.988264364  | 0.327156771 | 1.003141953  | 0.32008928  |
| CBFA2T3    | 0.266981276  | 0.790114037 | -1.129835094 | 0.263229076 | -1.030127788 | 0.30736019  |
| CBFB       | 0.614144351  | 0.540719153 | -1.230072855 | 0.223670425 | -1.843641524 | 0.070506583 |
| CBL        | -0.773398945 | 0.441378144 | -0.240636541 | 0.810691322 | -0.38707724  | 0.700160001 |
| CBLB       | 1.100925306  | 0.273959291 | -0.432203898 | 0.667207076 | 0.101228479  | 0.919729145 |
| CBLL1      | -0.712208776 | 0.478237015 | -1.812149192 | 0.075176823 | -3.123869256 | 0.002802057 |
| CBLN3      | 2.480166691  | 0.015053968 | 0.007907708  | 0.993717954 | 0.31164988   | 0.756459089 |
| CBR1       | 0.075984964  | 0.939605144 | 2.101322002  | 0.039998761 | 2.663520279  | 0.01006864  |
| CBR3       | 2.213020375  | 0.029507911 | 1.000040545  | 0.321473864 | 1.278134128  | 0.206452527 |
| CBR4       | 1.246799744  | 0.215810015 | -0.335882819 | 0.73817975  | -0.626621423 | 0.533442964 |
| CBS        | -1.781073035 | 0.07838314  | -1.193494524 | 0.237568608 | -1.141495317 | 0.25850125  |
| CBWD1      | 0.933193712  | 0.353297091 | -0.324751756 | 0.746545566 | -0.416239222 | 0.678819261 |
| CBWD2      | 1.080036097  | 0.28310467  | -1.058315826 | 0.294329888 | -1.512275825 | 0.136063364 |
| CBWD6      | 2.071903203  | 0.041228825 | 0.796999683  | 0.42872449  | 1.368457     | 0.176611431 |
| CBX1       | -0.855819249 | 0.394443606 | -0.277860616 | 0.782114353 | 0.258989456  | 0.796589031 |
| CBX2       | -0.251370547 | 0.802119144 | 1.035641421  | 0.304698152 | 0.938570193  | 0.351965198 |
| CBX3       | 1.310370494  | 0.193512047 | 0.293170575  | 0.77044548  | 0.163001845  | 0.871101319 |
| CBX4       | 0.055439608  | 0.955915086 | -4.433349949 | 4.22E-05    | -4.666641457 | 1.94E-05    |
| CBX5       | 1.642416256  | 0.104105815 | 0.921637148  | 0.360562362 | 1.550406258  | 0.126653908 |
| CBX6       | 0.729875272  | 0.467422883 | -0.81391997  | 0.419043077 | -0.818156795 | 0.416720905 |
| CBX7       | 2.545589957  | 0.012667224 | -0.478863515 | 0.633848721 | 0.565371726  | 0.574069741 |
| CBX8       | -2.579356578 | 0.011573746 | -1.266077099 | 0.210582442 | -1.768630622 | 0.082378783 |
| CBY1       | 1.608617492  | 0.111315218 | 2.14522725   | 0.036163636 | 3.406908881  | 0.001219753 |
| CBY3       | 2.122264793  | 0.036651649 | -1.812319386 | 0.075150192 | -3.053279405 | 0.003454353 |
| CC2D1A     | -0.015866525 | 0.987377127 | 1.151442914  | 0.254307512 | 1.549570276  | 0.12685448  |
| CC2D1B     | 0.27142983   | 0.786702089 | 2.154305536  | 0.035412032 | 3.045145749  | 0.003535379 |
| CC2D2A     | 1.332911065  | 0.186033618 | 0.128267363  | 0.898384216 | -1.348399171 | 0.18293577  |
| CC2D2B     | -0.425359881 | 0.67162239  | 1.439993336  | 0.155282868 | 0.635525782  | 0.527663282 |
| CCAR1      | 2.85773069   | 0.005335166 | 0.733738794  | 0.46608428  | 0.620268583  | 0.537586491 |
| CCBL1      | 1.289675292  | 0.200573936 | 2.377560467  | 0.020769028 | 0.54260933   | 0.004569788 |
| CCBL2      | 1.450651352  | 0.150465185 | -0.159452145 | 0.873870503 | 0.491411769  | 0.625047745 |
| CCDC101    | -0.710539305 | 0.479266089 | -0.202475038 | 0.840258892 | 0.460136277  | 0.647192594 |
| CCDC102A   | 1.309898057  | 0.193671159 | 0.268014735  | 0.789645505 | 0.375806805  | 0.70847445  |
| CCDC103    | -1.105095458 | 0.272158448 | 1.93058557   | 0.058462315 | 1.423127859  | 0.160223231 |
| CCDC104    | 3.250470391  | 0.001638177 | 0.768275523  | 0.445462152 | 1.560040892  | 0.124360584 |
| CCDC106    | -0.291440846 | 0.771406418 | -0.39391764  | 0.69509646  | 0.539579163  | 0.591617429 |
| CCDC107    | 0.451029318  | 0.653088172 | -2.410774088 | 0.019131203 | -1.685341236 | 0.097464658 |
| CCDC109B   | 2.043388616  | 0.044032673 | -0.11795483  | 0.906513844 | 0.172645142  | 0.863550217 |
| CCDC111    | 1.767621935  | 0.080622705 | -0.256532884 | 0.798453508 | -1.204564624 | 0.233416459 |
| CCDC112    | 1.390635594  | 0.167875262 | -0.274221875 | 0.784895241 | -0.154370423 | 0.87787035  |
| CCDC114    | 1.508199589  | 0.135118598 | -0.733690011 | 0.466113788 | 1.050631857  | 0.297921625 |
| CCDC115    | 0.330858438  | 0.741545228 | 0.38290388   | 0.703200548 | 0.410305603  | 0.683140805 |
| CCDC117    | 1.621380545  | 0.108547057 | 0.307265133  | 0.759749825 | -0.320458576 | 0.749808458 |

|          |              |             |              |             |              |             |
|----------|--------------|-------------|--------------|-------------|--------------|-------------|
| CCDC12   | -1.105994618 | 0.271771237 | 1.151140531  | 0.254430854 | 1.625865529  | 0.109569777 |
| CCDC120  | 1.105724438  | 0.271887546 | -0.688417435 | 0.493953503 | 0.425269598  | 0.672263102 |
| CCDC121  | 0.011681046  | 0.990706773 | -1.131279848 | 0.262625727 | -1.261081733 | 0.212485948 |
| CCDC122  | 0.865611279  | 0.389078971 | -1.426205122 | 0.159207098 | -0.273656879 | 0.785350906 |
| CCDC124  | -1.37237009  | 0.173468515 | -0.863998095 | 0.391172873 | -0.462219169 | 0.64570748  |
| CCDC125  | -2.045287145 | 0.043841028 | -1.432079408 | 0.157525916 | -0.875561142 | 0.384993064 |
| CCDC126  | -0.745828632 | 0.457777037 | -1.002416511 | 0.320335346 | -1.888744245 | 0.064087241 |
| CCDC127  | 0.499421871  | 0.618740141 | 2.893968918  | 0.005363532 | 3.950226717  | 0.000219986 |
| CCDC13   | -1.204303632 | 0.231731351 | 0.944384802  | 0.348917913 | 1.198730937  | 0.235659588 |
| CCDC130  | 0.864829946  | 0.389505365 | -1.281857915 | 0.205028532 | -0.155046041 | 0.877340171 |
| CCDC132  | 1.249306442  | 0.21489653  | 1.310990845  | 0.195063813 | 1.213198121  | 0.230125356 |
| CCDC134  | 1.48189067   | 0.141974663 | 1.449327936  | 0.152669231 | 0.757375039  | 0.451987034 |
| CCDC135  | 0.287033665  | 0.774767582 | 1.525520116  | 0.132602225 | 2.233060463  | 0.029541985 |
| CCDC136  | 3.181266534  | 0.0020317   | 1.751470716  | 0.085188308 | 1.726053824  | 0.089828566 |
| CCDC137  | -0.051331714 | 0.959178617 | 1.37002599   | 0.175995859 | 2.298843205  | 0.025251708 |
| CCDC138  | -0.384209408 | 0.70175869  | -0.042335747 | 0.966377472 | -0.675416    | 0.502179362 |
| CCDC14   | 1.983122446  | 0.05050107  | -0.119906415 | 0.904974562 | -0.922100346 | 0.360415409 |
| CCDC141  | 0.48767866   | 0.627001518 | 1.461871922  | 0.149211236 | 1.826390824  | 0.073101113 |
| CCDC142  | 1.783709703  | 0.077950237 | -1.049562929 | 0.298303185 | 0.31818702   | 0.751521696 |
| CCDC144A | 0.039547947  | 0.968543944 | 0.510954775  | 0.611335784 | -0.448801178 | 0.655299761 |
| CCDC144B | -0.488800424 | 0.626210273 | -0.0470637   | 0.962625268 | 0.337448971  | 0.737034784 |
| CCDC146  | 0.375649413  | 0.708089941 | -1.19409375  | 0.237335992 | -1.274169601 | 0.207843721 |
| CCDC147  | -1.550247331 | 0.124704558 | -0.433322719 | 0.666398896 | -1.740198647 | 0.087294099 |
| CCDC149  | -2.773342041 | 0.006784917 | 2.409691004  | 0.01918273  | 1.431420014  | 0.157844081 |
| CCDC15   | 1.524595808  | 0.130979162 | 0.473234491  | 0.637834573 | 1.391268221  | 0.16962382  |
| CCDC151  | -0.745380292 | 0.458046555 | -1.519484308 | 0.134111396 | -1.966508586 | 0.054182364 |
| CCDC152  | 1.560577114  | 0.122246137 | -1.259947592 | 0.212769526 | -1.302464172 | 0.198066615 |
| CCDC153  | -2.456248452 | 0.016022478 | -0.997217198 | 0.322830281 | 0.800529085  | 0.426773349 |
| CCDC154  | 0.778635654  | 0.438302463 | 0.324789618  | 0.746517058 | 0.28307467   | 0.77815901  |
| CCDC157  | 0.502427168  | 0.616633704 | 1.287168606  | 0.203184273 | 0.388410321  | 0.69917897  |
| CCDC159  | -0.604506055 | 0.547077155 | 2.20975361   | 0.031111657 | 3.196495057  | 0.002283444 |
| CCDC163P | 3.51133646   | 0.000708483 | 1.208013855  | 0.231978709 | 0.541453792  | 0.590333554 |
| CCDC165  | -0.400440329 | 0.689811732 | 0.069909808  | 0.944507609 | -0.286901598 | 0.775242103 |
| CCDC167  | 0.690348366  | 0.491808779 | -0.051603636 | 0.959023077 | 0.679114018  | 0.499851187 |
| CCDC17   | -0.000885466 | 0.999295523 | 0.032415227  | 0.97425299  | -0.523087852 | 0.602968144 |
| CCDC18   | 0.284884652  | 0.776408103 | 0.386422005  | 0.700608041 | 0.668233565  | 0.506718015 |
| CCDC19   | -1.003083708 | 0.318596247 | -0.90793616  | 0.367695249 | -1.526968164 | 0.132374084 |
| CCDC22   | -0.573295803 | 0.567920165 | 3.037940086  | 0.003576598 | 3.669773434  | 0.000541113 |
| CCDC23   | -1.899584782 | 0.060793571 | -0.691971432 | 0.491735476 | 0.212888992  | 0.832183387 |
| CCDC24   | -1.697810664 | 0.093110119 | 1.340395262  | 0.185380329 | -0.257176523 | 0.797981159 |
| CCDC25   | 0.555595009  | 0.579910602 | 0.641419938  | 0.523794256 | 1.710003676  | 0.092777779 |
| CCDC28A  | -2.026304461 | 0.045789812 | 1.03589503   | 0.304580826 | 0.15052499   | 0.880889045 |
| CCDC28B  | -0.384656443 | 0.701428622 | -0.180295078 | 0.857553787 | 0.436502479  | 0.664143526 |
| CCDC30   | -0.080061192 | 0.936372068 | -1.307882847 | 0.196109194 | -1.020153105 | 0.312024545 |
| CCDC34   | 1.613966294  | 0.1101483   | 0.611907257  | 0.543007156 | 0.958398678  | 0.341964097 |
| CCDC36   | -0.209558312 | 0.834501297 | 1.348403676  | 0.182807261 | 1.921352928  | 0.059760879 |
| CCDC39   | 1.644207783  | 0.103734457 | -2.585312907 | 0.012283455 | -3.555582392 | 0.000773214 |
| CCDC41   | 0.567229516  | 0.572015828 | -0.523819938 | 0.602413667 | -0.805561892 | 0.423888613 |
| CCDC43   | 0.955053017  | 0.342191386 | -0.109972977 | 0.912813093 | 0.246709726  | 0.80603125  |
| CCDC47   | 0.757572192  | 0.450749763 | 2.584861427  | 0.012297841 | 2.075745004  | 0.042501715 |
| CCDC50   | 1.814229249  | 0.073081995 | 0.777486242  | 0.440053814 | 0.274819524  | 0.78446202  |
| CCDC51   | -0.080220455 | 0.936245769 | 2.110471772  | 0.039171519 | 2.34119881   | 0.022791306 |
| CCDC53   | 1.152461989  | 0.252281303 | -0.058258891 | 0.953744068 | 0.8098712    | 0.421427908 |
| CCDC56   | -0.545712939 | 0.586656792 | 1.426741643  | 0.159052974 | 2.253588059  | 0.028138747 |
| CCDC57   | 2.102620773  | 0.038381826 | -0.452349365 | 0.652716476 | 0.867955244  | 0.389107653 |
| CCDC58   | 0.040527855  | 0.967764961 | -1.126375028 | 0.264678037 | -0.461539159 | 0.646192172 |
| CCDC59   | -0.292196597 | 0.770830476 | -1.905209854 | 0.061749234 | -0.620364663 | 0.537523701 |
| CCDC6    | 0.144200147  | 0.885675211 | 0.148972554  | 0.882095671 | 0.714711262  | 0.477743955 |
| CCDC61   | -0.306749079 | 0.759765753 | 0.724093218  | 0.471939498 | 0.582442317  | 0.562596833 |
| CCDC62   | 0.53491826   | 0.594067998 | -0.647104175 | 0.520135286 | -1.096410253 | 0.277572245 |
| CCDC64   | 1.580531824  | 0.117606275 | -9.69E-05    | 0.999923051 | 1.380464298  | 0.172906329 |
| CCDC64B  | -0.069752412 | 0.944550457 | -0.240864891 | 0.810515183 | 0.270076622  | 0.788089951 |
| CCDC65   | 1.943713314  | 0.055155289 | -1.224053898 | 0.225915435 | 0.444129743  | 0.658653146 |
| CCDC66   | 1.80254393   | 0.074915198 | -1.199157973 | 0.235376689 | -0.856803534 | 0.395189901 |
| CCDC69   | -4.032085258 | 0.000118061 | -0.431365524 | 0.667812936 | -0.62566696  | 0.534064437 |
| CCDC7    | -0.444567174 | 0.657734169 | 0.10697233   | 0.915182669 | -1.089169082 | 0.280724749 |
| CCDC71   | -0.920318467 | 0.359945707 | 2.077983169  | 0.04217805  | 2.323583078  | 0.023787375 |
| CCDC72   | 0.66989327   | 0.50469615  | -1.156018341 | 0.252446404 | -0.817010347 | 0.417370291 |
| CCDC73   | 0.12860891   | 0.897963314 | 0.654679289  | 0.515280251 | 0.330882258  | 0.74196314  |
| CCDC75   | 1.05843554   | 0.292780517 | -0.090425564 | 0.928262778 | 0.177419717  | 0.859816213 |
| CCDC76   | 1.472257032  | 0.144552114 | -1.437228433 | 0.156063681 | -1.724862076 | 0.090044854 |
| CCDC77   | 0.407786169  | 0.684430267 | 1.94098453   | 0.057159058 | 2.559477684  | 0.013198585 |

|         |              |             |              |             |              |             |
|---------|--------------|-------------|--------------|-------------|--------------|-------------|
| CCDC78  | 0.793659137  | 0.429548584 | -0.135669463 | 0.892555643 | -0.252862628 | 0.801296391 |
| CCDC82  | 0.852607002  | 0.396213329 | -0.793836599 | 0.43054904  | -0.977571694 | 0.332472876 |
| CCDC84  | 1.984449429  | 0.050350362 | -0.263534757 | 0.793078993 | 1.959751052  | 0.054987698 |
| CCDC85B | 0.663907947  | 0.508501065 | -3.63906523  | 0.000586455 | -2.544653972 | 0.01371024  |
| CCDC85C | 1.96071374   | 0.053104706 | 2.679225103  | 0.00960325  | 2.137674509  | 0.036903853 |
| CCDC86  | -0.181280667 | 0.856568035 | 2.361690312  | 0.021595028 | 2.503390323  | 0.015230573 |
| CCDC88A | 2.052177213  | 0.043151523 | -0.267218899 | 0.790255136 | -0.425943191 | 0.671775082 |
| CCDC88B | -0.937118816 | 0.351286027 | 0.574135047  | 0.56811193  | 1.147966448  | 0.255842356 |
| CCDC88C | 3.69044124   | 0.000389189 | -0.227998806 | 0.820454652 | 0.479020194  | 0.633781671 |
| CCDC9   | -0.760759485 | 0.448853281 | -0.118704345 | 0.905922632 | -0.452994821 | 0.652295423 |
| CCDC90A | -1.236354313 | 0.219647139 | -0.494136598 | 0.623089062 | -0.932370347 | 0.35513093  |
| CCDC90B | -1.1110662   | 0.269594414 | -0.926383017 | 0.358112525 | -0.826956626 | 0.411756793 |
| CCDC91  | 1.074891778  | 0.285388804 | -0.218019221 | 0.828184727 | -0.72771278  | 0.469808467 |
| CCDC92  | -0.922463055 | 0.358832754 | -1.369302306 | 0.176220647 | -0.643188645 | 0.522715809 |
| CCDC93  | 2.160667081  | 0.033463746 | 1.718655196  | 0.091048484 | 1.870875258  | 0.066568679 |
| CCDC94  | -1.067315641 | 0.288775716 | 1.191715915  | 0.238260025 | 1.372054385  | 0.175495062 |
| CCDC96  | -1.092747657 | 0.277514741 | 1.719101221  | 0.090966657 | 0.630909241  | 0.53065571  |
| CCDC97  | -1.250643227 | 0.214410543 | 0.248816224  | 0.804388047 | -0.262136051 | 0.794174381 |
| CCDC99  | 2.556992919  | 0.012287968 | -0.771188004 | 0.443747815 | -0.371148808 | 0.711921273 |
| CCHCR1  | 1.327756911  | 0.187724187 | 1.998220786  | 0.050421526 | 1.673921315  | 0.099699831 |
| CCL2    | -1.102457305 | 0.273296751 | -0.896870975 | 0.373521286 | -1.311028015 | 0.195176571 |
| CCL23   | -0.889766037 | 0.376040005 | 0.356404649  | 0.722839848 | -1.128642335 | 0.263840545 |
| CCL28   | 1.300769587  | 0.196764756 | -0.727774904 | 0.469699684 | 0.343954328  | 0.732163401 |
| CCL3    | -0.403712719 | 0.687412431 | -0.567923594 | 0.572294233 | -0.623097087 | 0.535739601 |
| CCL4    | 1.547284153  | 0.125416967 | -3.660105904 | 0.000548772 | -2.96645051  | 0.004416317 |
| CCL5    | -1.035312358 | 0.30338606  | -1.898889982 | 0.062591848 | -1.381009585 | 0.172739496 |
| CCM2    | -1.379719766 | 0.171201098 | 1.466924638  | 0.147835808 | 1.730552385  | 0.089015998 |
| CCNA1   | -1.575547982 | 0.118751737 | 0.686827416  | 0.494947599 | -2.184300712 | 0.033125454 |
| CCNA2   | 1.634704068  | 0.105716722 | -0.405554204 | 0.686572791 | -0.362172723 | 0.718580414 |
| CCNB1   | 0.377439755  | 0.706764029 | 1.528901047  | 0.131762785 | 1.840908405  | 0.070912404 |
| CCNB1P1 | 0.094368312  | 0.92503312  | -0.701990607 | 0.48551221  | 0.493054644  | 0.623893814 |
| CCNB2   | -0.218319477 | 0.827690386 | 1.154965303  | 0.252873874 | 2.971881239  | 0.004349498 |
| CCNC    | 1.073968679  | 0.285800008 | -0.337523005 | 0.736949686 | -0.195569308 | 0.845652204 |
| CCND1   | 0.631417521  | 0.529419511 | -1.62775704  | 0.109035097 | 0.364395056  | 0.71692965  |
| CCND2   | 0.447572852  | 0.655571531 | 0.679247502  | 0.499701688 | 2.115274378  | 0.038849478 |
| CCND3   | -1.10594105  | 0.271794295 | -1.113832263 | 0.26997778  | -1.82125323  | 0.073889146 |
| CCNDP1  | -1.795643913 | 0.076015507 | 0.110032288  | 0.912766263 | -0.097597855 | 0.922598646 |
| CCNE1   | 2.328944085  | 0.022174785 | 0.981212614  | 0.330591636 | 1.669177976  | 0.100604084 |
| CCNE2   | -0.614990944 | 0.540162489 | -1.918479479 | 0.060011343 | -1.982064832 | 0.052366767 |
| CCNF    | 1.640285175  | 0.104548955 | 1.802321666  | 0.07672807  | 1.391021844  | 0.004876204 |
| CCNG1   | 0.933784371  | 0.352993989 | 1.344760596  | 0.183974379 | 1.137862167  | 0.260002652 |
| CCNG2   | -1.067066325 | 0.28888764  | -1.773873006 | 0.081370215 | -2.495839194 | 0.015524752 |
| CCNH    | 0.521732434  | 0.603179518 | -0.743069827 | 0.460459603 | -0.502416663 | 0.617336208 |
| CCNI    | -1.435687131 | 0.154669389 | 0.782297445  | 0.437244216 | 0.284732865  | 0.776894726 |
| CCNI2   | -0.571481447 | 0.569143633 | 0.562706858  | 0.575818329 | 2.076130299  | 0.042464724 |
| CCNJ    | -0.467096342 | 0.641596155 | -1.436430868 | 0.156289482 | -1.671196168 | 0.100239372 |
| CCNJL   | -1.554716079 | 0.123636253 | -1.022118847 | 0.310998667 | -0.853832977 | 0.396819974 |
| CCNK    | -1.520863786 | 0.131912455 | -2.161474358 | 0.034828216 | -2.127495007 | 0.037777206 |
| CCNL1   | 0.119810613  | 0.904908818 | -1.080633603 | 0.28436428  | -1.778837097 | 0.080671441 |
| CCNL2   | 2.450738426  | 0.016253342 | -0.189230289 | 0.850577582 | 0.271883517  | 0.786707263 |
| CCNT1   | -0.077923348 | 0.938067578 | -0.799886231 | 0.427063487 | -1.709972638 | 0.092783559 |
| CCNT2   | 0.913642033  | 0.3634246   | -0.973593762 | 0.334329553 | -1.919022833 | 0.060061555 |
| CCNY    | -2.359181664 | 0.0205493   | -1.032571517 | 0.306120817 | -1.377722641 | 0.173747024 |
| CCNYL1  | 0.449887545  | 0.653908069 | -1.004334022 | 0.319418486 | -0.504672775 | 0.615760565 |
| CCP110  | 0.442049062  | 0.659548242 | -0.609220407 | 0.544774042 | -1.60040858  | 0.115111344 |
| CCPG1   | -1.675613443 | 0.097396778 | -0.885801853 | 0.379407727 | -1.442287224 | 0.154767821 |
| CCR1    | -0.825404176 | 0.411394882 | -0.259022334 | 0.796541512 | -1.901790254 | 0.06232548  |
| CCR10   | -1.279554567 | 0.204096355 | -0.553583296 | 0.582006787 | -1.727649324 | 0.089539674 |
| CCR2    | -1.607561637 | 0.111546737 | 2.681004813  | 0.009558067 | 1.164026977  | 0.249327789 |
| CCR3    | -2.095111037 | 0.03906168  | -0.827301124 | 0.41148094  | -1.178481953 | 0.243567031 |
| CCR4    | 0.494487956  | 0.622205276 | 1.70337871   | 0.09388793  | 1.123260701  | 0.26609919  |
| CCR5    | -0.418306156 | 0.676751823 | -0.94663718  | 0.34777841  | -1.098007535 | 0.2768802   |
| CCR6    | -0.036874496 | 0.970669371 | 1.858353725  | 0.068231571 | 1.536834553  | 0.129941578 |
| CCR7    | 2.200413868  | 0.030421082 | 1.587042086  | 0.117978368 | 2.484449267  | 0.015978201 |
| CCR8    | 1.031417467  | 0.305197718 | 0.704277373  | 0.484097973 | 0.050838928  | 0.959634017 |
| CCR9    | -0.215078739 | 0.830208222 | 1.625235575  | 0.109572498 | 1.896335766  | 0.063056999 |
| CCRL2   | -2.095744777 | 0.039003908 | -0.144610556 | 0.885523198 | 0.258627248  | 0.796867113 |
| CCRN4L  | -0.334230323 | 0.739008382 | 1.043887571  | 0.300899021 | 1.010803353  | 0.316439953 |
| CCS     | -0.961510191 | 0.33895472  | 1.550120847  | 0.126590306 | 1.738732461  | 0.087554028 |
| CCT2    | 2.685701311  | 0.008664213 | 0.824863014  | 0.412852574 | 1.710818705  | 0.092626117 |
| CCT3    | -1.114302539 | 0.268211691 | 3.24328938   | 0.001968132 | 4.310420152  | 6.62E-05    |
| CCT4    | 0.969701347  | 0.334877744 | 4.255455549  | 7.77E-05    | 4.461646172  | 3.95E-05    |

|         |              |             |              |             |              |             |
|---------|--------------|-------------|--------------|-------------|--------------|-------------|
| CCT5    | -0.8175843   | 0.415823231 | 2.627269562  | 0.011011507 | 2.533805543  | 0.014096011 |
| CCT6A   | 0.841846848  | 0.402176862 | 2.480579648  | 0.016061127 | 2.506078842  | 0.015127056 |
| CCT6B   | 1.133274725  | 0.260205554 | 1.584208797  | 0.118622085 | 1.288640974  | 0.202799166 |
| CCT6P1  | 1.907415106  | 0.059759018 | -0.583434012 | 0.561878923 | 1.144361552  | 0.257321138 |
| CCT6P3  | 0.981182637  | 0.329217502 | -0.149720854 | 0.881507905 | -0.498718025 | 0.619923209 |
| CCT7    | -0.285421651 | 0.775998071 | 3.303783612  | 0.0016437   | 3.81746106   | 0.000338821 |
| CCT8    | 1.108945607  | 0.27050313  | 2.098273096  | 0.040277775 | 3.023464236  | 0.003760124 |
| CCZ1    | 0.028120922  | 0.977629974 | -1.043468188 | 0.301091452 | -1.388121431 | 0.170574906 |
| CD101   | 1.839073304  | 0.06930834  | 1.857257149  | 0.068389908 | 1.749421305  | 0.085673713 |
| CD109   | 0.216210489  | 0.829328726 | -0.001826398 | 0.998549057 | -0.613329369 | 0.542131363 |
| CD14    | -1.607758913 | 0.11150345  | 2.783139095  | 0.007268818 | 2.278777111  | 0.026497678 |
| CD151   | -1.386242615 | 0.169207733 | 0.82674715   | 0.411792352 | -0.017717977 | 0.985926551 |
| CD160   | 2.960518926  | 0.00395529  | -2.14270354  | 0.03637504  | -1.439179693 | 0.155642681 |
| CD163   | -0.080305479 | 0.936178344 | 2.787172288  | 0.007189748 | 1.933144471  | 0.058258884 |
| CD164   | 0.25722511   | 0.797611074 | -1.200502087 | 0.234858641 | -2.097866788 | 0.040422673 |
| CD177   | -0.809745507 | 0.420290907 | 1.403188578  | 0.165928756 | 1.35144059   | 0.181965856 |
| CD180   | -0.316687895 | 0.752237437 | 0.36561512   | 0.715991648 | 0.976805561  | 0.332848753 |
| CD19    | 0.314676384  | 0.753759181 | 2.48242682   | 0.015986292 | 2.785592056  | 0.007269232 |
| CD1A    | -1.662391921 | 0.100025445 | 1.154571551  | 0.253033847 | 0.586056081  | 0.560182726 |
| CD1C    | 0.561434659  | 0.575941521 | 0.845045605  | 0.401582095 | 1.182951617  | 0.241805317 |
| CD1D    | -3.432588763 | 0.000916466 | 2.534296643  | 0.014009254 | 1.370597106  | 0.175946644 |
| CD1E    | 0.866697697  | 0.388486566 | -0.081653344 | 0.93520547  | -1.497842512 | 0.13976651  |
| CD2     | 1.364633127  | 0.175880002 | -0.613378889 | 0.542040647 | 0.349437704  | 0.728065885 |
| CD200   | 1.624767349  | 0.107821874 | 0.32483673   | 0.746481584 | 0.087535054  | 0.930557178 |
| CD200R1 | 0.439351074  | 0.661494161 | -0.310098123 | 0.757605615 | -1.968377251 | 0.053961456 |
| CD209   | -2.785586358 | 0.006554317 | 1.151142245  | 0.254430155 | 0.635675175  | 0.527566593 |
| CD22    | 0.229947432  | 0.818671242 | 1.263803003  | 0.211391913 | 1.731600564  | 0.088827543 |
| CD226   | -0.536247089 | 0.593153328 | -1.724982492 | 0.08989336  | -2.511919334 | 0.014904365 |
| CD24    | -1.760262783 | 0.081870189 | 0.999648385  | 0.321662041 | -0.158544138 | 0.874596015 |
| CD244   | 0.112769687  | 0.91047239  | 0.206023501  | 0.837499062 | 1.339245833  | 0.185878525 |
| CD247   | 0.24838541   | 0.80442032  | -1.175124099 | 0.244780238 | -0.20098393  | 0.841436293 |
| CD248   | -0.836596742 | 0.40510637  | 0.012104992  | 0.990383682 | 0.10856291   | 0.913935612 |
| CD27    | 1.559089688  | 0.122597742 | 2.827783698  | 0.006436576 | 3.377810534  | 0.001331961 |
| CD274   | -1.432037587 | 0.155708372 | -1.754029943 | 0.084744743 | -2.407232158 | 0.019380591 |
| CD28    | 2.007081424  | 0.047838455 | -0.468280055 | 0.641351674 | 0.315292517  | 0.753706591 |
| CD2AP   | 0.753994746  | 0.452883879 | -0.423866554 | 0.673241987 | -1.602944232 | 0.114549413 |
| CD2BP2  | -0.73850235  | 0.462192537 | 1.283722695  | 0.204379527 | 1.926282996  | 0.059128926 |
| CD300A  | -1.5340621   | 0.12863522  | 1.611676201  | 0.112499357 | 1.629827119  | 0.108727196 |
| CD300C  | -0.816447134 | 0.416469578 | 2.949379423  | 0.004595286 | 1.152345102  | 0.254054333 |
| CD300E  | 0.715569307  | 0.47616929  | 1.947832848  | 0.056314397 | 0.721100141  | 0.473835121 |
| CD300LB | -2.748184778 | 0.007282142 | 0.692074871  | 0.491671002 | 1.034939951  | 0.305126965 |
| CD300LD | -2.281694082 | 0.024942909 | -1.696326101 | 0.095223179 | 0.139436416  | 0.889603463 |
| CD300LF | -3.753783129 | 0.000313493 | 1.307307019  | 0.196303336 | 0.672608905  | 0.503950561 |
| CD302   | -1.746438212 | 0.084256714 | -4.237780705 | 8.25E-05    | -4.852323826 | 1.01E-05    |
| CD320   | 1.232209327  | 0.221183525 | 0.826614406  | 0.411866994 | 1.330378393  | 0.1887635   |
| CD33    | -2.517685568 | 0.013640132 | -0.428703066 | 0.669738461 | 0.046154624  | 0.963350519 |
| CD34    | 0.982378014  | 0.32863183  | 1.183769768  | 0.241366818 | 2.061788837  | 0.043860587 |
| CD36    | 2.745126276  | 0.007344808 | 0.442170384  | 0.660021839 | 1.033242785  | 0.30591332  |
| CD37    | -1.851978182 | 0.067413298 | -2.362982083 | 0.021526714 | -2.444031974 | 0.017685334 |
| CD38    | -0.328322676 | 0.7434549   | -0.511506053 | 0.610952237 | -1.135881586 | 0.260823734 |
| CD3D    | 1.805512784  | 0.074445859 | -0.89625004  | 0.373849949 | 0.832635542  | 0.408572442 |
| CD3E    | 0.717526591  | 0.474967279 | -0.721586085 | 0.473468205 | 0.835699269  | 0.406860781 |
| CD3EAP  | -0.900360932 | 0.370408372 | -0.083297394 | 0.933903901 | 0.960213187  | 0.341058306 |
| CD3G    | 1.611603353  | 0.110662592 | -0.177669288 | 0.859606082 | 0.00381331   | 0.996970921 |
| CD4     | -0.870590101 | 0.386368694 | 2.091655877  | 0.040889166 | 1.804986846  | 0.076431343 |
| CD40    | -0.523987174 | 0.601616946 | 0.657934579  | 0.513201315 | 1.31671522   | 0.193274926 |
| CD40LG  | -0.688024103 | 0.493264038 | -0.992335055 | 0.325184826 | 0.139371679  | 0.889654381 |
| CD44    | -0.652834269 | 0.51558083  | 1.344833187  | 0.183951068 | 1.422816032  | 0.160313239 |
| CD46    | -0.754001942 | 0.45287958  | -0.864767688 | 0.390753773 | -1.876375886 | 0.065796299 |
| CD47    | 1.970454849  | 0.051959204 | -0.665098178 | 0.508642237 | -1.130888717 | 0.262901777 |
| CD48    | 0.739631168  | 0.461510635 | 0.48972672   | 0.626187423 | 0.464649024  | 0.643976812 |
| CD5     | -0.563718092 | 0.574393078 | 0.929427103  | 0.356546826 | 1.830866221  | 0.072420417 |
| CD52    | 0.429125446  | 0.668890426 | -1.690943738 | 0.096252673 | -1.205151822 | 0.233191538 |
| CD53    | -2.398408468 | 0.018598526 | -1.386771036 | 0.170855641 | -1.492939734 | 0.141042383 |
| CD55    | -2.532444825 | 0.013117477 | 0.267705269  | 0.789882548 | -0.467414215 | 0.642009709 |
| CD58    | -1.490115707 | 0.139802618 | -2.536616744 | 0.013926232 | -2.702500675 | 0.009082477 |
| CD59    | -0.407934058 | 0.684322091 | 0.929695366  | 0.35640906  | 0.660751654  | 0.511469356 |
| CD6     | 0.892276231  | 0.374700894 | -1.048317388 | 0.298871561 | 0.352038343  | 0.726125306 |
| CD63    | -2.176504395 | 0.032221004 | 0.387991889  | 0.699452345 | -0.091943729 | 0.927069491 |
| CD68    | -2.160489009 | 0.033477953 | 0.333718908  | 0.739803636 | 0.139564072  | 0.889503059 |
| CD69    | 1.717627365  | 0.089414491 | -0.761805645 | 0.449284264 | -0.838249295 | 0.405439473 |
| CD7     | -0.254054803 | 0.800051399 | -0.408295037 | 0.684571046 | 0.393089408  | 0.695739661 |



|          |              |             |              |              |              |             |
|----------|--------------|-------------|--------------|--------------|--------------|-------------|
| CD70     | -0.529158295 | 0.598040309 | -1.510149063 | 0.136472353  | -0.464996986 | 0.643729137 |
| CD72     | -0.981161132 | 0.329228045 | 1.838742882  | 0.071110356  | 2.211808822  | 0.031059473 |
| CD74     | -1.150901962 | 0.252919125 | 0.667921348  | 0.506851511  | 0.690526017  | 0.492703729 |
| CD79A    | -1.472297297 | 0.144541265 | -0.062817901 | 0.950129007  | 0.199788165  | 0.842366938 |
| CD79B    | -0.222053587 | 0.824791467 | 1.564221412  | 0.123243818  | 1.701667186  | 0.094340832 |
| CD80     | 1.00041766   | 0.319876849 | -0.616334426 | 0.540102232  | -1.179013838 | 0.243356905 |
| CD81     | -0.492936005 | 0.623296994 | 1.114514673  | 0.269687531  | 1.745628011  | 0.086337133 |
| CD82     | -3.169200607 | 0.002108756 | 0.467405383  | 0.641973456  | 0.435241028  | 0.665053361 |
| CD83     | -0.986750427 | 0.326495437 | 0.090713865  | 0.928034697  | 0.674289217  | 0.502889924 |
| CD84     | 1.437997696  | 0.154014372 | -1.334128151 | 0.187413024  | -1.444094544 | 0.154260775 |
| CD86     | -2.69623156  | 0.008415737 | 2.062518271  | 0.043678253  | 0.781146049  | 0.437992703 |
| CD8A     | 0.172619642  | 0.863350489 | -2.556112442 | 0.013246012  | -0.548266035 | 0.585679191 |
| CD8B     | 1.519690541  | 0.132206938 | -1.31971861  | 0.192150645  | 0.465501112  | 0.643370379 |
| CD9      | -2.872018176 | 0.005119953 | -0.54890859  | 0.585189921  | -1.410238723 | 0.163976466 |
| CD93     | -0.882259994 | 0.380062147 | 0.650826011  | 0.517746869  | -0.0612627   | 0.951367204 |
| CD96     | 2.936433643  | 0.004245288 | 0.561767694  | 0.576453884  | 1.726133265  | 0.089814164 |
| CD97     | -3.265878761 | 0.001560863 | 0.590100154  | 0.55743164   | 0.225100452  | 0.822717099 |
| CD99     | -0.581526867 | 0.56238588  | 0.612398784  | 0.542684243  | 0.721134903  | 0.473813902 |
| CD99L2   | -0.438631034 | 0.662013883 | 2.905998132  | 0.005187276  | 3.001907255  | 0.003996738 |
| CD99P1   | 1.329014835  | 0.187310526 | 0.681748225  | 0.498130501  | -0.941019988 | 0.350719369 |
| CDA      | -3.795093234 | 0.000271918 | -1.151862473 | 0.254136445  | -0.796565582 | 0.429053426 |
| CDADC1   | -1.185534338 | 0.239027272 | -1.524476083 | 0.132862302  | -0.954207199 | 0.34406249  |
| CDAN1    | 0.441487124  | 0.659953346 | 0.566756411  | 0.573081794  | 1.046302199  | 0.29989794  |
| CDC123   | -1.746620081 | 0.08422495  | -0.624109544 | 0.535019906  | -0.228160657 | 0.820348924 |
| CDC14A   | 1.320009657  | 0.190286956 | -1.118976223 | 0.267795315  | -2.484982154 | 0.015956722 |
| CDC14B   | -1.006760731 | 0.316835648 | 0.357046534  | 0.722361844  | -0.982855948 | 0.329888013 |
| CDC16    | 1.842639247  | 0.068780294 | 1.691668182  | 0.096113577  | 3.163211341  | 0.002516425 |
| CDC20    | 0.042595085  | 0.966121709 | 1.736792055  | 0.087769768  | 2.573015375  | 0.012746527 |
| CDC23    | 1.501448263  | 0.136852664 | 0.326825185  | 0.744984872  | 0.755875581  | 0.452878408 |
| CDC25A   | -0.770358904 | 0.443169408 | 0.335197932  | 0.738693587  | 1.745826014  | 0.086302399 |
| CDC25B   | 1.854422226  | 0.067059326 | 1.435233609  | 0.156628918  | 2.27325928   | 0.026849724 |
| CDC26    | -1.582857752 | 0.117074723 | 0.311482589  | 0.756558446  | 0.689685732  | 0.493228083 |
| CDC27    | -0.172570375 | 0.8633891   | -0.530079766 | 0.598094292  | -1.447613848 | 0.153277149 |
| CDC34    | -2.353804736 | 0.020830383 | 0.573015394  | 0.568864707  | 0.402061919  | 0.689162518 |
| CDC37    | -0.715140848 | 0.476432642 | -0.040222538 | 0.968054812  | 0.757494213  | 0.451916233 |
| CDC37L1  | 0.488787284  | 0.626219539 | 0.696872212  | 0.488685949  | 0.250572877  | 0.803057564 |
| CDC40    | 1.038169568  | 0.302061699 | -0.666596774 | 0.50769126   | -0.814529613 | 0.418777557 |
| CDC42    | -1.777494491 | 0.078973868 | -1.409596449 | 0.164035786  | -1.171387707 | 0.246382471 |
| CDC42BPA | -1.053244643 | 0.295139026 | 0.394856481  | 0.694407282  | 0.14963325   | 0.881589324 |
| CDC42BPB | -0.164285173 | 0.869886911 | 1.251079497  | 0.1251963499 | 1.132193786  | 0.262357475 |
| CDC42BPG | 2.169029529  | 0.032802448 | 0.119239295  | 0.905500701  | 1.249486683  | 0.216662537 |
| CDC42EP1 | -0.931992938 | 0.353913795 | -0.867755206 | 0.389129504  | -0.577650756 | 0.565805678 |
| CDC42EP2 | -2.694882817 | 0.008447196 | 0.393390539  | 0.695483504  | -0.053487177 | 0.957533303 |
| CDC42EP3 | 0.32401624   | 0.746701735 | -1.23471891  | 0.221948723  | -1.985558547 | 0.051966268 |
| CDC42EP4 | -1.035567868 | 0.303267468 | 0.722851003  | 0.472696581  | 0.937751567  | 0.352382146 |
| CDC42SE1 | -0.061992336 | 0.950710826 | -1.269486208 | 0.209373275  | -0.72645432  | 0.470573285 |
| CDC42SE2 | -0.00815434  | 0.993512479 | -1.044545727 | 0.3005972    | -1.40586565  | 0.165265218 |
| CDC45    | -0.091314764 | 0.927451956 | 0.201598806  | 0.840940696  | 1.437309465  | 0.156171059 |
| CDC5L    | -0.353523326 | 0.72454953  | 1.249521589  | 0.216528242  | 1.372132053  | 0.175471019 |
| CDC6     | 0.619825692  | 0.536989077 | 0.215493448  | 0.830143906  | 1.136992308  | 0.26036304  |
| CDC7     | 0.775799539  | 0.439966642 | -0.866793428 | 0.389651948  | -0.782572961 | 0.437160878 |
| CDC73    | -0.383944834 | 0.701954065 | -0.561916238 | 0.576353338  | -2.333090752 | 0.023245055 |
| CDCA2    | 1.605977352  | 0.11189485  | 1.986910531  | 0.051696001  | 0.958094159  | 0.342116265 |
| CDCA3    | 1.490539043  | 0.139691532 | 0.134504912  | 0.893472249  | 0.920566046  | 0.36120922  |
| CDCA4    | 2.513383601  | 0.013795956 | -0.953507066 | 0.344317879  | -1.405221265 | 0.16545578  |
| CDCA5    | 0.431458413  | 0.667200062 | 1.575660514  | 0.120581375  | 1.897682195  | 0.062875751 |
| CDCA7    | 1.212533886  | 0.228583363 | 0.750393952  | 0.456072099  | -0.873303285 | 0.386211645 |
| CDCA7L   | 1.826909063  | 0.07113517  | 1.662992819  | 0.101746792  | 1.453360203  | 0.151681612 |
| CDCA8    | -2.409198116 | 0.018091688 | 0.458217345  | 0.6485205    | 0.113604416  | 0.909955984 |
| CDCP1    | -2.497488321 | 0.014385672 | 1.287946702  | 0.202915106  | 1.796885587  | 0.077724527 |
| CDH1     | 0.080621213  | 0.935927967 | 1.946973998  | 0.056419738  | -0.37392516  | 0.709866096 |
| CDH13    | 0.417456019  | 0.677371076 | 0.872336098  | 0.386647145  | -0.283008995 | 0.778209095 |
| CDH2     | -3.035530102 | 0.00316527  | 0.838337254  | 0.405307021  | -0.438710583 | 0.662552131 |
| CDH23    | -0.237515143 | 0.812814404 | -0.875444471 | 0.384968396  | -0.39393169  | 0.695121231 |
| CDH24    | -1.023729582 | 0.308795027 | -1.25937829  | 0.212973512  | -0.393681194 | 0.695305131 |
| CDH26    | -0.450659806 | 0.653353469 | -0.075619494 | 0.939983875  | 0.420611208  | 0.675641992 |
| CDHR1    | 0.885244636  | 0.378459604 | -1.390820445 | 0.169630092  | -0.287850331 | 0.774519474 |
| CDHR2    | -0.270357335 | 0.787524292 | -2.245687552 | 0.028576693  | -1.730492771 | 0.089026726 |
| CDHR3    | 3.038257196  | 0.003139515 | 0.145346569  | 0.884944705  | 2.138021184  | 0.036874423 |
| CDHR5    | 1.441555172  | 0.153010066 | -0.422254255 | 0.674411546  | -0.441329522 | 0.660666672 |
| CDIPT    | -2.288091941 | 0.024551095 | -0.970885106 | 0.33566517   | -1.19292183  | 0.237908789 |
| CDK1     | 1.012265248  | 0.31421218  | 1.036888707  | 0.30412142   | 0.960057374  | 0.341136025 |

|            |              |             |              |             |              |             |
|------------|--------------|-------------|--------------|-------------|--------------|-------------|
| CDK10      | -0.17845229  | 0.85878178  | -0.966172509 | 0.337997305 | 0.609355237  | 0.544743075 |
| CDK11A     | -2.523100593 | 0.01344624  | -0.556283067 | 0.580172229 | -0.386025534 | 0.700934328 |
| CDK11B     | -1.620617909 | 0.108710893 | 0.291924288  | 0.771393418 | -0.213392079 | 0.831792892 |
| CDK12      | -0.967308829 | 0.336065234 | -0.524186648 | 0.602160234 | -0.767233103 | 0.446152183 |
| CDK13      | 0.517510148  | 0.606110616 | -1.004464742 | 0.319356046 | -1.940516606 | 0.057336283 |
| CDK14      | -2.153727627 | 0.034021292 | 0.698833395  | 0.487468533 | -1.259987312 | 0.212877594 |
| CDK16      | 0.32033625   | 0.749479893 | -2.587606614 | 0.012210607 | -2.244556631 | 0.028748692 |
| CDK17      | -0.213517604 | 0.831421754 | -0.846714471 | 0.400658714 | -2.749174492 | 0.008018481 |
| CDK18      | 0.447378771  | 0.655711088 | -0.918705443 | 0.3620811   | -0.606271304 | 0.546774182 |
| CDK19      | -3.246298045 | 0.001659721 | -0.794756866 | 0.430017729 | -1.633966327 | 0.107852467 |
| CDK2       | 1.997614733  | 0.048875817 | -0.67713037  | 0.501033974 | -0.93807303  | 0.352218378 |
| CDK20      | 0.876187692  | 0.38333562  | -0.017438252 | 0.986147261 | 0.163792349  | 0.870481857 |
| CDK2AP1    | -1.948578093 | 0.054561754 | -0.711909757 | 0.47939441  | -0.384915346 | 0.701752058 |
| CDK2AP2    | -1.127433145 | 0.262652535 | -2.992650596 | 0.004067857 | -3.03169867  | 0.003673242 |
| CDK4       | 0.870649094  | 0.386336651 | 0.768584453  | 0.445280127 | 2.48324226   | 0.016023633 |
| CDK5       | -1.223882341 | 0.224293668 | 2.137895628  | 0.036780779 | 2.536277195  | 0.014007264 |
| CDK5R1     | 0.851118346  | 0.397035125 | -0.930716386 | 0.355885032 | -0.92330578  | 0.359792534 |
| CDK5RAP1   | 1.459397719  | 0.148049249 | 2.383667972  | 0.020458755 | 3.012956949  | 0.003873773 |
| CDK5RAP2   | -0.09931338  | 0.921117442 | 3.409857713  | 0.00119326  | 3.472203665  | 0.000999712 |
| CDK5RAP3   | -0.119817793 | 0.904903147 | 2.378726834  | 0.020709451 | 3.117113036  | 0.002876155 |
| CDK6       | 2.370746758  | 0.019956099 | 0.292518345  | 0.770941529 | -0.121104824 | 0.904039686 |
| CDK7       | -0.422203022 | 0.673916136 | -2.534548187 | 0.014000231 | -2.337772082 | 0.022982102 |
| CDK8       | -0.050470087 | 0.95986323  | -1.298914761 | 0.199149233 | -2.407504165 | 0.019367544 |
| CDK9       | -0.582236474 | 0.561910008 | -1.115609097 | 0.269222499 | 0.188579491  | 0.85110129  |
| CDKAL1     | 0.055552137  | 0.955825697 | 0.935378445  | 0.353498616 | 2.524973691  | 0.014417306 |
| CDKL1      | -1.542153328 | 0.126658151 | -1.218997006 | 0.227814328 | -1.40164634  | 0.166516063 |
| CDKL5      | -1.169371904 | 0.245440759 | -0.208431073 | 0.83562773  | -1.813417871 | 0.075104699 |
| CDKN1A     | -2.71965582  | 0.007886101 | 1.063480247  | 0.2920027   | -0.388937894 | 0.698790865 |
| CDKN1B     | -1.230414646 | 0.221851169 | -1.789053451 | 0.078864818 | -2.634653674 | 0.010861001 |
| CDKN1C     | 0.141066422  | 0.888142885 | -0.555426459 | 0.580754013 | -1.270675718 | 0.209075538 |
| CDKN2A     | 0.948311191  | 0.345592121 | -3.411202292 | 0.001188384 | -3.69972376  | 0.000492291 |
| CDKN2AIP   | 0.502357468  | 0.616682521 | -0.736811413 | 0.464227816 | -1.798426647 | 0.077477132 |
| CDKN2AIPNL | -0.48004078  | 0.632400528 | -2.278945995 | 0.026394949 | -1.670757389 | 0.100326467 |
| CDKN2B     | -0.565750204 | 0.573016749 | 1.334136483  | 0.18741031  | 0.200924374  | 0.841482639 |
| CDKN2C     | -1.551723673 | 0.124350814 | -0.961039303 | 0.340549712 | -0.336360397 | 0.737851004 |
| CDKN2D     | -2.460273796 | 0.015855679 | -1.206973114 | 0.232376176 | -1.854195376 | 0.068957837 |
| CDNF       | 1.293169564  | 0.19936833  | -1.356540771 | 0.180220766 | 0.201307999  | 0.841184114 |
| CDO1       | 0.561761051  | 0.575720065 | -0.244717064 | 0.807545262 | -0.28401279  | 0.77744367  |
| CDON       | -1.016018548 | 0.312431704 | -0.188030564 | 0.851513587 | 1.018250143  | 0.31291982  |
| CDR2       | 1.443093597  | 0.152577329 | 2.121904764  | 0.038158832 | 3.302719798  | 0.001668397 |
| CDRT15P    | 2.346150993  | 0.021236368 | 0.261533193  | 0.794614341 | 0.022995654  | 0.98173514  |
| CDS1       | -2.708588576 | 0.008132434 | -0.800923529 | 0.426467538 | 0.119598412  | 0.905227511 |
| CDS2       | -0.287081417 | 0.77473114  | -0.362910327 | 0.718000324 | -0.121423012 | 0.903788819 |
| CDT1       | 0.351655197  | 0.725945306 | 0.640119504  | 0.524633251 | 1.558147318  | 0.124808665 |
| CDV3       | -0.692840853 | 0.490250801 | 1.854384903  | 0.068806108 | 1.357107704  | 0.180169606 |
| CDYL       | 0.287060357  | 0.774747212 | 0.905083901  | 0.369191436 | 0.350441263  | 0.727316824 |
| CDYL2      | 2.256175082  | 0.026561053 | 1.563590479  | 0.123392028 | -0.375063911 | 0.709023768 |
| CEACAM1    | -3.874242551 | 0.000206491 | -0.192144218 | 0.848305083 | -0.55975371  | 0.577870271 |
| CEACAM19   | -0.287424646 | 0.774469223 | -0.773901853 | 0.442153883 | 0.80790919   | 0.422547188 |
| CEACAM21   | -0.22793789  | 0.820228222 | 2.707970766  | 0.008896848 | 1.471931801  | 0.146613731 |
| CEACAM22P  | -1.737364299 | 0.085854052 | 2.304271039  | 0.024834006 | 1.988171991  | 0.051668401 |
| CEACAM3    | -2.712454258 | 0.008045607 | -1.498246209 | 0.139530284 | -1.528305437 | 0.13204228  |
| CEACAM4    | -2.275959489 | 0.025298774 | -2.411131403 | 0.019114231 | -1.430879377 | 0.157998356 |
| CEACAM6    | -2.654291306 | 0.009445502 | 2.08941116   | 0.04109839  | -0.08453912  | 0.932928037 |
| CEACAM8    | -3.738914701 | 0.000329887 | 1.800589648  | 0.077004221 | -0.363146739 | 0.717856743 |
| CEBPA      | -0.656491924 | 0.513236628 | -0.319100094 | 0.750805044 | -0.802879374 | 0.425424736 |
| CEBPB      | -1.291703389 | 0.199873537 | -1.938606135 | 0.057454925 | -3.253934599 | 0.001928404 |
| CEBPD      | -0.121333613 | 0.903705995 | -1.790928321 | 0.078559903 | -3.054357621 | 0.003443743 |
| CEBPE      | 0.80119084   | 0.42519918  | -0.594767928 | 0.554328062 | -1.258904258 | 0.213265698 |
| CEBPG      | 1.362669462  | 0.176496072 | -0.113578469 | 0.909966931 | -0.112458047 | 0.910860697 |
| CEBPZ      | 1.658970515  | 0.100714972 | 1.170286046  | 0.246705468 | 2.038310778  | 0.046231616 |
| CECR1      | -0.672025776 | 0.503344197 | 0.952234299  | 0.344957295 | 0.80120407   | 0.426385776 |
| CECR5      | 0.589541969  | 0.557022385 | 1.389761357  | 0.169949969 | 0.834230244  | 0.407680956 |
| CECR6      | -1.28243868  | 0.203087935 | 0.31765161   | 0.751897981 | -1.579745782 | 0.119773871 |
| CECR7      | -1.25996749  | 0.211043123 | 1.814109479  | 0.074870562 | 1.415786947  | 0.162352601 |
| CEL        | -0.238666893 | 0.81192396  | -1.379372565 | 0.173112341 | 0.151362019  | 0.880231818 |
| CELA1      | 0.595871356  | 0.552804915 | -1.52695024  | 0.132246627 | 0.148791605  | 0.88225035  |
| CELF1      | 2.125330157  | 0.036387851 | 0.136452339  | 0.891939532 | 0.123128926  | 0.902444004 |
| CELF2      | 1.213553651  | 0.22819548  | -2.252601678 | 0.02811043  | -2.83135142  | 0.006419284 |
| CELF3      | -0.439213275 | 0.661593611 | 0.939399286  | 0.351448784 | 1.213316992  | 0.230080279 |
| CELF6      | 0.381649013  | 0.703650259 | -1.538936042 | 0.129296101 | -1.447710772 | 0.153250129 |
| CELSR1     | 1.945804583  | 0.054899473 | 1.668027276  | 0.1007387   | 1.208463671  | 0.231925916 |

|           |              |             |              |             |              |             |
|-----------|--------------|-------------|--------------|-------------|--------------|-------------|
| CELSR2    | 0.59853606   | 0.551034117 | -0.101281779 | 0.919678539 | 0.62269362   | 0.536002847 |
| CELSR3    | 0.871754712  | 0.385736421 | -0.076556177 | 0.939241935 | -0.500632689 | 0.618583398 |
| CEMP1     | 0.717012443  | 0.475282865 | 1.965924601  | 0.054134122 | 2.802192061  | 0.00694958  |
| CEND1     | 0.435570221  | 0.664225012 | -0.128121299 | 0.898499287 | 0.155609369  | 0.876898154 |
| CENPB     | -0.780524854 | 0.437195962 | -1.184274813 | 0.241168488 | -0.275553819 | 0.783900771 |
| CENPBD1   | -0.061047635 | 0.951460993 | 2.060083331  | 0.043918625 | 1.35213779   | 0.181744071 |
| CENPC1    | 1.886331873  | 0.062578951 | 0.389812764  | 0.698112772 | 0.569634704  | 0.571194015 |
| CENPE     | -0.056533243 | 0.955046368 | 0.527134221  | 0.600124965 | -0.678112299 | 0.500481261 |
| CENPF     | 0.520550606  | 0.603999286 | 2.055467699  | 0.044377416 | 2.905828584  | 0.005229875 |
| CENPH     | 1.578386949  | 0.118098157 | 1.362470829  | 0.178353453 | 3.071712205  | 0.003277106 |
| CENPJ     | 0.770370217  | 0.443162735 | -0.111233911 | 0.911817584 | -0.332607485 | 0.740667285 |
| CENPK     | 2.5938858    | 0.011130034 | -0.728992213 | 0.468960443 | -1.736000247 | 0.08804011  |
| CENPL     | 0.899331672  | 0.370953119 | 0.364253667  | 0.71700246  | 0.084953777  | 0.932599858 |
| CENPM     | -0.149138227 | 0.881788983 | 1.01946293   | 0.312246419 | 1.563702438  | 0.123497799 |
| CENPN     | -0.95594581  | 0.341742678 | 0.099752927  | 0.920886878 | 0.180340938  | 0.857533223 |
| CENPO     | 0.249343627  | 0.803681462 | 0.160995189  | 0.872660564 | 0.847517349  | 0.400299449 |
| CENPP     | -0.567587979 | 0.571773414 | 0.128328934  | 0.89833571  | 0.216501321  | 0.829380449 |
| CENPQ     | 0.779407409  | 0.43785025  | 0.094664211  | 0.924910113 | -0.204984863 | 0.838324091 |
| CENPT     | 1.439606414  | 0.153559588 | -0.45995851  | 0.647277648 | 0.967337344  | 0.337517246 |
| CENPV     | -0.744838023 | 0.458372659 | 0.431062991  | 0.66803162  | 0.031135312  | 0.975271867 |
| CENPW     | 1.501492291  | 0.136841299 | -0.640813765 | 0.52418525  | -0.297831968 | 0.766928958 |
| CEP104    | 1.005559646  | 0.317410025 | 1.239933184  | 0.220028078 | 0.593112245  | 0.5554839   |
| CEP120    | 2.253651747  | 0.026725962 | -0.30336973  | 0.76270124  | -1.180819613 | 0.242644493 |
| CEP128    | 0.677508542  | 0.499877219 | 0.168145281  | 0.867058036 | 0.191718997  | 0.84865289  |
| CEP135    | 0.48066165   | 0.631960901 | -0.664438359 | 0.509061249 | -1.219073419 | 0.227905138 |
| CEP152    | -1.145267602 | 0.255232265 | 0.821381537  | 0.414815997 | -0.27620383  | 0.783404041 |
| CEP164    | 0.054162429  | 0.956929667 | 1.318000815  | 0.192721404 | 1.484626079  | 0.143226874 |
| CEP170    | -0.052248472 | 0.958450233 | -0.209807363 | 0.834558409 | -1.631771121 | 0.10831566  |
| CEP19     | -2.349419218 | 0.021062158 | -0.814565126 | 0.418676563 | -1.631135329 | 0.108450114 |
| CEP192    | 0.494585433  | 0.622136735 | 0.870125046  | 0.387844061 | -0.089923262 | 0.928667701 |
| CEP250    | 0.921846088  | 0.359152708 | 2.549559274  | 0.013471219 | 3.040129305  | 0.003586234 |
| CEP290    | 0.553504127  | 0.581334894 | -0.407088596 | 0.685451881 | -1.308759136 | 0.195939141 |
| CEP350    | -0.308305791 | 0.758585046 | -0.758369165 | 0.45132212  | -1.806250909 | 0.076231197 |
| CEP44     | 1.633694543  | 0.105929071 | -0.716828051 | 0.476377053 | -0.904361639 | 0.369661645 |
| CEP55     | 0.987261617  | 0.326246266 | 0.666894792  | 0.507502258 | -0.505064476 | 0.615487192 |
| CEP57     | 1.321516664  | 0.1897864   | -0.02261637  | 0.982034458 | -0.372029096 | 0.711269412 |
| CEP57L1   | 0.698125082  | 0.486956739 | -0.134519484 | 0.893460779 | -1.320888837 | 0.191888298 |
| CEP63     | -2.361217145 | 0.02044095  | -0.460964991 | 0.646559678 | -1.293981834 | 0.200960721 |
| CEP68     | 3.602967597  | 0.000522685 | 1.713361882  | 0.092024226 | 1.044963579  | 0.300510779 |
| CEP70     | 0.509257818  | 0.611857989 | -0.681334058 | 0.498390532 | 0.035629505  | 0.971703951 |
| CEP72     | 0.195070133  | 0.845791898 | 1.831969792  | 0.072128068 | 2.185041437  | 0.033068278 |
| CEP76     | 1.782425688  | 0.078160805 | 1.96499154   | 0.054244773 | 1.539517563  | 0.129286294 |
| CEP78     | 0.791873747  | 0.430583453 | -2.335228945 | 0.023037676 | -0.902982151 | 0.37038699  |
| CEP85     | -0.09896041  | 0.921396873 | -0.209622507 | 0.834702016 | -0.416128628 | 0.67889971  |
| CEP89     | -0.535630805 | 0.593577452 | 0.044115192  | 0.964965172 | 0.071480891  | 0.477684033 |
| CEP95     | 2.328306803  | 0.022210234 | 0.869436677  | 0.388217171 | 1.669276998  | 0.100620773 |
| CEP97     | -0.443756544 | 0.658317932 | -0.698239677 | 0.48783691  | -1.740080514 | 0.087315019 |
| CEPT1     | 1.157667727  | 0.250161178 | -0.471882148 | 0.638793761 | -0.853684736 | 0.396901429 |
| CERCAM    | 0.268288491  | 0.789111003 | 0.3496327    | 0.727889559 | -0.723387629 | 0.7855568   |
| CERK      | 2.305997625  | 0.023483216 | -2.329237752 | 0.023376002 | -1.04941176  | 0.298477643 |
| CERKL     | 0.885635043  | 0.378250296 | -0.536729413 | 0.593521806 | -0.638878471 | 0.525495629 |
| CERS2     | -1.944720294 | 0.055031984 | -2.041451636 | 0.045796128 | -2.413805822 | 0.019067459 |
| CERS3     | 1.981923654  | 0.050637549 | 0.294069505  | 0.769761962 | 0.281315695  | 0.779500791 |
| CERS4     | -0.605333499 | 0.54652985  | 0.256124102  | 0.798767588 | 0.843356236  | 0.402602192 |
| CERS5     | 0.024875134  | 0.980211405 | 0.196698134  | 0.844756198 | 1.334086446  | 0.187553006 |
| CERS6     | 1.187800322  | 0.238137797 | -0.273614081 | 0.78536002  | -0.031265755 | 0.975168301 |
| CES1      | -1.530606631 | 0.129486954 | 1.558615078  | 0.124565783 | 1.286856413  | 0.203416248 |
| CES1P1    | 1.271849982  | 0.206808405 | 0.53900762   | 0.591959032 | -0.199844847 | 0.842322818 |
| CES2      | -1.434978182 | 0.154870798 | 0.171580294  | 0.864368913 | 0.329848837  | 0.742739724 |
| CES4A     | 0.548372259  | 0.584837719 | 0.54269141   | 0.589436185 | 1.433957121  | 0.157121661 |
| CETN2     | -1.434997201 | 0.154865392 | 2.875796565  | 0.005640346 | 3.004122695  | 0.003971796 |
| CETN3     | 0.400086808  | 0.690071122 | -0.199082462 | 0.842899366 | -0.544671871 | 0.588132671 |
| CETP      | -0.69755729  | 0.487310103 | 1.53445863   | 0.130392101 | 1.187556806  | 0.239999836 |
| CFB       | -0.217378012 | 0.828421656 | 1.600697566  | 0.114915215 | 0.346030178  | 0.730611268 |
| CFD       | 0.254858814  | 0.799432327 | -0.906068744 | 0.368674386 | -1.143050149 | 0.257860604 |
| CFDP1     | -0.678308816 | 0.499372254 | 1.304330191  | 0.197309288 | 1.196292248  | 0.236601924 |
| CFH       | 1.020708673  | 0.310216342 | -0.581294322 | 0.563310128 | -1.001340849 | 0.320951281 |
| CFL1      | -1.947292195 | 0.054718113 | 0.938544913  | 0.351883697 | -1.065448004 | 0.291226356 |
| CFL2      | 0.465404073  | 0.642802514 | -1.474097829 | 0.145900253 | -0.734614769 | 0.465626408 |
| CFLAR     | -2.432933607 | 0.017019806 | -0.679999435 | 0.499228969 | -0.633777215 | 0.528795657 |
| CFLAR-AS1 | -1.532011811 | 0.129140057 | 0.160610975  | 0.872961807 | 0.922595626  | 0.360159402 |
| CFP       | -3.029870788 | 0.003219345 | 0.944037811  | 0.349093675 | 0.706719996  | 0.482658552 |

|            |              |             |              |             |              |             |
|------------|--------------|-------------|--------------|-------------|--------------|-------------|
| CG030      | 2.444557359  | 0.016515857 | -1.273280565 | 0.208033543 | 0.70869451   | 0.481441616 |
| CGGBP1     | 0.380981335  | 0.704143834 | -0.74488638  | 0.459369147 | -1.640794435 | 0.106422011 |
| CGN        | 1.196718376  | 0.234660258 | 0.81406057   | 0.418963186 | 1.683937592  | 0.097737151 |
| CGRRF1     | -0.973499255 | 0.332998367 | -1.081622963 | 0.283927987 | -1.204268841 | 0.233529816 |
| CHAC2      | 0.924161066  | 0.357953119 | -1.361517024 | 0.178652795 | -2.027581618 | 0.047351533 |
| CHAD       | 1.836362016  | 0.069712091 | -0.558401306 | 0.578734785 | -0.188874775 | 0.850870944 |
| CHADL      | -0.252172402 | 0.801501307 | 1.35891586   | 0.179471093 | 1.167314548  | 0.248009073 |
| CHAF1A     | -0.813996931 | 0.417864282 | 1.597991543  | 0.115517067 | 1.249967875  | 0.216488012 |
| CHAF1B     | 1.109573912  | 0.270233666 | -0.099920878 | 0.920754128 | 2.37187739   | 0.021145136 |
| CHCHD1     | -0.424003979 | 0.672607197 | -1.044596833 | 0.300573772 | -0.312430654 | 0.755868841 |
| CHCHD10    | -0.020992976 | 0.983299227 | -4.276032125 | 7.25E-05    | -4.40516956  | 4.80E-05    |
| CHCHD2     | 0.457401828  | 0.648519979 | -0.867613406 | 0.389206503 | -0.189235659 | 0.850589442 |
| CHCHD3     | 0.830758728  | 0.408379119 | 2.008666253  | 0.049268588 | 3.831971392  | 0.000322791 |
| CHCHD4     | 0.828539226  | 0.409627547 | 0.661948662  | 0.510643974 | 0.540611441  | 0.590910292 |
| CHCHD5     | -1.008646847 | 0.315935078 | 0.29760678   | 0.767074121 | 0.557498385  | 0.579399387 |
| CHCHD6     | 0.930175827  | 0.354848359 | -1.128621418 | 0.263736683 | -0.3089652   | 0.758489757 |
| CHCHD7     | 1.918143534  | 0.058365716 | 1.84607724   | 0.07002196  | 1.944524536  | 0.056839958 |
| CHCHD8     | 0.61685433   | 0.538938278 | 0.607019628  | 0.546223465 | 0.749389872  | 0.45674565  |
| CHD1       | -0.067525666 | 0.94631784  | -0.144517872 | 0.88559605  | -2.408846192 | 0.019303283 |
| CHD1L      | 2.079264727  | 0.040530449 | 2.552459678  | 0.013371119 | 3.534633595  | 0.000825017 |
| CHD2       | 0.218729809  | 0.827371713 | 0.307589638  | 0.759504119 | -0.196003855 | 0.84531369  |
| CHD3       | 1.083768598  | 0.281455306 | 0.677615163  | 0.500728729 | 1.682743557  | 0.097969444 |
| CHD4       | -1.151967389 | 0.252483399 | 1.893418543  | 0.063329203 | 2.014572072  | 0.048740832 |
| CHD5       | 2.201357717  | 0.030351867 | -0.670161662 | 0.505432911 | -0.102778596 | 0.918504318 |
| CHD6       | 2.510858029  | 0.01388818  | 0.62124769   | 0.53688772  | 0.4051396    | 0.686911991 |
| CHD7       | 1.598587993  | 0.113530036 | 1.971492311  | 0.05347786  | 1.10665989   | 0.273152437 |
| CHD8       | -0.493240125 | 0.623082995 | 1.278160544  | 0.206319884 | 1.405453239  | 0.165387159 |
| CHD9       | 0.21415747   | 0.830924312 | -1.887665148 | 0.064112488 | -2.886416217 | 0.005518464 |
| CHDH       | -0.069953901 | 0.944390548 | 0.891919012  | 0.376147482 | -0.545002396 | 0.587906841 |
| CHEK1      | 0.409882717  | 0.682897334 | -1.559457238 | 0.124366482 | -0.776714374 | 0.440582123 |
| CHEK2      | 0.415465661  | 0.67882175  | 1.624017295  | 0.109832919 | 2.818370174  | 0.006650571 |
| CHERP      | -0.632617797 | 0.528638885 | -0.002167077 | 0.998278413 | -0.183816329 | 0.854818735 |
| CHFR       | -1.446850315 | 0.151524598 | -0.872771053 | 0.386411962 | -0.598582381 | 0.551854888 |
| CHI3L1     | -0.110028088 | 0.91263996  | -0.253625608 | 0.800687982 | 0.65344175   | 0.516134435 |
| CHI3L2     | 0.706441423  | 0.481797259 | 0.323646163  | 0.747378196 | 0.694918074  | 0.489967999 |
| CHIC1      | 1.907234649  | 0.059782692 | -1.604975654 | 0.113968883 | -1.21895534  | 0.227949605 |
| CHIC2      | -0.75173732  | 0.454233522 | -1.440779335 | 0.155061457 | -1.909700148 | 0.061277473 |
| CHID1      | -0.726645737 | 0.469389409 | 1.800971616  | 0.076943249 | 2.25985521   | 0.027722446 |
| CHIT1      | 0.702561512  | 0.484200594 | 0.608114609  | 0.545502071 | 0.219095676  | 0.827368766 |
| CHKA       | -1.115882582 | 0.267538423 | -0.594898303 | 0.55424215  | -0.246004808 | 0.806574178 |
| CHKB       | 0.595781177  | 0.552864892 | 2.145446923  | 0.036145285 | 2.719155355  | 0.008688782 |
| CHKB-CPT1B | -0.013855159 | 0.988977191 | 3.745807081  | 0.000417869 | 4.272308912  | 7.54E-05    |
| CHL1       | 0.583950455  | 0.560761406 | 1.435740929  | 0.156485017 | 0.00666474   | 0.994705933 |
| CHM        | 1.165193013  | 0.247118803 | -1.65902843  | 0.102546402 | -2.472268853 | 0.01647632  |
| CHML       | 0.440521928  | 0.660649398 | -1.06655259  | 0.290624277 | -1.56645614  | 0.1228521   |
| CHMP1A     | -1.793849705 | 0.076303807 | 1.287867657  | 0.202942438 | 1.320301571  | 0.192082954 |
| CHMP1B     | -1.028374426 | 0.306618219 | -1.38599027  | 0.17109272  | -1.828420079 | 0.072791806 |
| CHMP2A     | -2.567237113 | 0.011956012 | 1.516023828  | 0.13498277  | 1.519299546  | 0.134289644 |
| CHMP2B     | -0.40669808  | 0.685226367 | 0.374292303  | 0.709561329 | -0.10972441  | 0.913018555 |
| CHMP4A     | -0.203941814 | 0.838874238 | 1.92308426   | 0.059418073 | 2.435728292  | 0.018055759 |
| CHMP4B     | -2.092625058 | 0.039289015 | 0.603735844  | 0.548389791 | 0.780561536  | 0.438333718 |
| CHMP5      | -1.177053953 | 0.242377258 | -0.37210207  | 0.711182445 | -1.181855349 | 0.242236556 |
| CHMP6      | -1.378079139 | 0.171705274 | 1.021795013  | 0.311150624 | 1.434658995  | 0.156922263 |
| CHMP7      | 1.529577299  | 0.129741532 | 1.4985641    | 0.139447918 | 2.987930452  | 0.00415749  |
| CHN1       | 0.285754761  | 0.775743753 | 0.440286686  | 0.661377435 | 1.002230497  | 0.320525304 |
| CHN2       | 1.234573642  | 0.220306208 | 0.245390799  | 0.807026122 | -0.690516304 | 0.492709788 |
| CHORDC1    | 1.171450754  | 0.244609027 | 0.565566267  | 0.573885391 | -0.776865263 | 0.440493811 |
| CHP        | -0.160815517 | 0.872610732 | 0.140470923  | 0.888778031 | 0.231958657  | 0.817412138 |
| CHPF       | -0.849254545 | 0.39806549  | 0.950595473  | 0.345781758 | 0.600207545  | 0.550779026 |
| CHPF2      | -0.537974509 | 0.591965278 | -0.406157017 | 0.686132337 | -0.478367761 | 0.634242993 |
| CHPT1      | -3.363975523 | 0.001143379 | -0.325663177 | 0.745859397 | -0.944849979 | 0.348777411 |
| CHRAC1     | -1.44727805  | 0.151405093 | -2.06788188  | 0.043152788 | -1.768842305 | 0.082343069 |
| CHRM5      | 1.318238853  | 0.190876397 | -0.668126756 | 0.506721354 | 0.564217606  | 0.574849499 |
| CHRNA10    | -0.357258663 | 0.721761461 | -1.842317468 | 0.070578133 | -2.16452013  | 0.034684793 |
| CHRNA2     | -1.065295463 | 0.289683472 | -0.181041999 | 0.856970179 | 0.386468076  | 0.700608464 |
| CHRNA5     | 1.669805388  | 0.09854452  | 1.031564605  | 0.306588426 | 1.219046603  | 0.227915236 |
| CHRNA7     | 0.326269232  | 0.745002518 | -0.296838618 | 0.767657575 | 0.068451449  | 0.945669075 |
| CHRNB1     | -1.026693199 | 0.30740493  | -1.652039006 | 0.103968648 | -1.837614991 | 0.071404029 |
| CHRNB2     | -1.672402184 | 0.098030011 | -0.250891964 | 0.802790534 | -1.319826606 | 0.192240496 |
| CHRNE      | -0.034074766 | 0.972895418 | -2.413741333 | 0.018990675 | -3.145072844 | 0.002652613 |
| CHST10     | 0.35636759   | 0.722426221 | -0.064066483 | 0.949139125 | 0.791349034  | 0.432065397 |
| CHST11     | -2.847405877 | 0.005495827 | -0.82364163  | 0.413540744 | -1.867520729 | 0.067043465 |

|         |              |             |              |             |              |             |
|---------|--------------|-------------|--------------|-------------|--------------|-------------|
| CHST12  | 2.691313746  | 0.008530962 | -4.179761912 | 0.000100387 | -3.72293818  | 0.000457379 |
| CHST13  | 0.567014663  | 0.572161148 | -0.605139225 | 0.547463442 | -0.868073278 | 0.38904359  |
| CHST14  | -0.808327338 | 0.421102238 | -0.515202839 | 0.608383066 | 0.037966727  | 0.969848668 |
| CHST15  | -2.958675715 | 0.003976819 | -0.868197993 | 0.388889127 | -0.871237894 | 0.387328466 |
| CHST2   | -1.079494317 | 0.283344631 | -0.404499473 | 0.687343708 | -0.894243607 | 0.375002844 |
| CHST7   | -1.507794028 | 0.135222276 | -1.744142944 | 0.086469023 | -1.878417099 | 0.065511615 |
| CHST8   | -3.012767644 | 0.003388013 | 0.130640159  | 0.896515197 | 0.039095847  | 0.968952434 |
| CHSY1   | -1.76676352  | 0.080767405 | 0.604210544  | 0.54807636  | -1.061015687 | 0.293218298 |
| CHSY3   | -0.720195955 | 0.473330699 | 0.944522544  | 0.348848158 | -1.414632297 | 0.162689515 |
| CHTF18  | 1.160355178  | 0.249071636 | -1.165259778 | 0.248717099 | -0.445603637 | 0.657594347 |
| CHTF8   | -0.346820076 | 0.729562168 | 1.160557492  | 0.250609699 | 1.77481881   | 0.081340067 |
| CHTOP   | -1.609368729 | 0.111150728 | -2.82458758  | 0.006493101 | -1.971201659 | 0.053629028 |
| CHUK    | -0.47744244  | 0.634241796 | -0.504161698 | 0.616070961 | -1.413696925 | 0.162962844 |
| CHURC1  | 0.278756007  | 0.781092162 | -0.503382236 | 0.616615347 | -0.822809761 | 0.414091597 |
| CIAO1   | 0.16535238   | 0.869049424 | 0.874479626  | 0.385488993 | 1.548836381  | 0.127030768 |
| CIAPIN1 | 1.143004691  | 0.256165483 | 2.476009838  | 0.016247625 | 3.113999249  | 0.002902115 |
| CIB1    | -0.858856419 | 0.39277482  | -0.790190409 | 0.432657985 | -0.069932748 | 0.944495275 |
| CIB2    | 2.796101698  | 0.006362027 | 0.152276765  | 0.879500825 | 0.811763282  | 0.420350212 |
| CIC     | 0.338168636  | 0.73604904  | -1.161822747 | 0.250099441 | -0.787808796 | 0.434116633 |
| CIDEB   | -2.952896671 | 0.004045024 | 1.216967171  | 0.228579816 | 1.916348163  | 0.060408281 |
| CIDECF  | -1.795957555 | 0.075965203 | -0.080805809 | 0.935876521 | 0.483136896  | 0.630874208 |
| CIITA   | 0.920062058  | 0.36007892  | 0.573408085  | 0.568600632 | 0.428174399  | 0.67015958  |
| CILP    | -0.503435285 | 0.615927823 | -0.40030093  | 0.69041578  | 0.535733732  | 0.594255158 |
| CINP    | -2.407820659 | 0.018155701 | -1.02912977  | 0.307721167 | -0.360575921 | 0.719767364 |
| CIR1    | -1.443084157 | 0.152579981 | -0.069583348 | 0.944766213 | -0.166734999 | 0.868176633 |
| CIRBP   | 0.112356449  | 0.910799062 | 0.209514466  | 0.834785952 | 1.747437218  | 0.086020186 |
| CIRH1A  | 0.61919414   | 0.53740307  | 0.415318778  | 0.67945171  | 1.761265798  | 0.08362937  |
| CISD1   | 1.243013561  | 0.217195154 | 0.198118352  | 0.843650074 | -0.173756584 | 0.86268072  |
| CISD2   | -0.261177442 | 0.794571609 | -0.626139799 | 0.533696885 | -0.672474571 | 0.504035407 |
| CISD3   | -0.105887573 | 0.915914794 | -1.031843703 | 0.306458764 | -0.798899977 | 0.427709644 |
| CISH    | -3.308093779 | 0.001366191 | 1.18135703   | 0.24231592  | 0.155880992  | 0.876685037 |
| CIT     | 0.253400921  | 0.800554969 | 0.792459723  | 0.4313447   | 0.682956286  | 0.49743844  |
| CITED2  | -0.492210814 | 0.623807418 | -0.703318058 | 0.484690976 | -1.54397369  | 0.128203779 |
| CITED4  | -1.488010547 | 0.14035605  | -2.030226586 | 0.046960444 | -2.253731963 | 0.028129122 |
| CIZ1    | -0.928272762 | 0.355828826 | 0.106019689  | 0.915935121 | 0.520607211  | 0.604684204 |
| CKAP2   | 0.621029591  | 0.536200352 | -0.010196926 | 0.991899409 | -0.952679125 | 0.344829589 |
| CKAP2L  | -0.689501403 | 0.492338805 | 0.390142348  | 0.697870408 | -0.458202151 | 0.648572929 |
| CKAP4   | -3.751642996 | 0.000315804 | 2.709181594  | 0.008868166 | 2.604968994  | 0.011734793 |
| CKAP5   | 0.121232149  | 0.903786121 | 1.583087906  | 0.118877528 | 1.931060689  | 0.058521947 |
| CKB     | -0.22679245  | 0.821116024 | -0.32999794  | 0.742598781 | -1.499210676 | 0.139412099 |
| CKLF    | -0.821437941 | 0.413637369 | -0.862067773 | 0.392225306 | -1.343733492 | 0.184431304 |
| CKM     | -1.550418261 | 0.124663561 | -0.565016281 | 0.574256932 | -1.951435476 | 0.055992757 |
| CKS1B   | 1.056796591  | 0.293523787 | 0.184620818  | 0.854174984 | 0.930517666  | 0.356080506 |
| CKS2    | 0.760103338  | 0.44924332  | -2.608242396 | 0.01157267  | -3.109367393 | 0.002941137 |
| CLASP1  | -2.126094696 | 0.036322313 | 0.222026695  | 0.825078484 | 0.432992466  | 0.666676416 |
| CLASP2  | 2.875002957  | 0.005076014 | 0.347301094  | 0.729631015 | -0.707945245 | 0.481903202 |
| CLASRP  | 0.112799306  | 0.910448976 | -2.723542855 | 0.008534375 | -2.721793727 | 0.008627871 |
| CLC     | 1.036023023  | 0.30305629  | 0.358650521  | 0.721167862 | -0.605294105 | 0.547418576 |
| CLCC1   | 2.877968003  | 0.005032708 | 0.720821111  | 0.473935198 | 1.239870827  | 0.220171976 |
| CLCF1   | 2.249309685  | 0.027011837 | -1.880058973 | 0.065160601 | -1.304648741 | 0.197326351 |
| CLCN1   | -2.064657074 | 0.041926355 | -0.258364857 | 0.797046359 | -1.167582192 | 0.247901936 |
| CLCN2   | 1.300455145  | 0.196871971 | -1.000559915 | 0.321224761 | -0.272615351 | 0.786147439 |
| CLCN3   | -0.767838445 | 0.444657722 | -0.164117275 | 0.870213398 | -0.758161445 | 0.451519951 |
| CLCN4   | -3.085192178 | 0.002725617 | -1.674056192 | 0.099542242 | -1.792374094 | 0.078452584 |
| CLCN5   | 1.19558008   | 0.235102082 | 1.178734347  | 0.243350661 | 1.410098822  | 0.164017574 |
| CLCN6   | 2.663416964  | 0.009212168 | -1.042567162 | 0.301505167 | -0.774863566 | 0.44166621  |
| CLCN7   | -0.728381041 | 0.468332171 | 1.367632446  | 0.176740172 | 1.851380112  | 0.069368136 |
| CLDN12  | -0.431310264 | 0.667307354 | 0.061807194  | 0.950930357 | -1.695657299 | 0.095481051 |
| CLDN15  | 0.532506714  | 0.595729606 | -2.197090834 | 0.032051035 | -1.449118452 | 0.152858119 |
| CLDN16  | -0.006684345 | 0.994681975 | 1.863071123  | 0.067553938 | 1.162978313  | 0.249749488 |
| CLDN20  | 2.285115279  | 0.02473271  | 0.216836462  | 0.829102028 | 0.147096363  | 0.883582045 |
| CLDN23  | 1.09762874   | 0.275388733 | 0.140793513  | 0.888524322 | -0.666192652 | 0.508011717 |
| CLDN5   | -3.162640067 | 0.002151789 | 0.525619718  | 0.601170315 | -0.100198063 | 0.920543437 |
| CLDN7   | 0.161900959  | 0.871758449 | -0.986186329 | 0.32816649  | 1.050848345  | 0.297823041 |
| CLDN9   | -1.257904385 | 0.211784833 | -0.367592937 | 0.714524126 | 0.198386044  | 0.843458474 |
| CLDND1  | 1.73531673   | 0.08621792  | -1.50914154  | 0.13672912  | -1.43618911  | 0.156488251 |
| CLDND2  | 0.540187028  | 0.590445223 | -3.129741324 | 0.002745949 | -1.632678443 | 0.108124018 |
| CLEC10A | 1.018502562  | 0.311257072 | 1.476783703  | 0.145180662 | 1.576769055  | 0.120457912 |
| CLEC11A | -0.999612453 | 0.320264291 | -2.704120269 | 0.008988626 | -1.663258683 | 0.101824515 |
| CLEC12A | 0.929180341  | 0.355361021 | -0.883122272 | 0.380841457 | -0.348062585 | 0.729092715 |
| CLEC12B | 0.981683812  | 0.328971869 | -0.172065743 | 0.863989005 | 0.119002347  | 0.905697576 |
| CLEC16A | -1.442640959 | 0.152704551 | 0.352074186  | 0.726067578 | 0.905081571  | 0.36928346  |

|         |              |             |              |             |              |             |
|---------|--------------|-------------|--------------|-------------|--------------|-------------|
| CLEC17A | -1.560155058 | 0.122345823 | 1.882579826  | 0.064811638 | 2.486407397  | 0.015899404 |
| CLEC18A | -0.596881298 | 0.552133436 | -0.316324702 | 0.752899634 | 1.929684499  | 0.058696237 |
| CLEC1A  | -0.466914672 | 0.641725616 | 0.189680469  | 0.850226414 | -1.039223738 | 0.303148271 |
| CLEC1B  | -0.758949321 | 0.449929787 | 2.157108588  | 0.035182744 | 1.109594093  | 0.27189631  |
| CLEC2B  | -0.062117543 | 0.950611405 | -1.416678372 | 0.161963164 | -1.180128211 | 0.242917086 |
| CLEC2D  | 2.655407968  | 0.009416665 | -1.744874289 | 0.086340489 | -0.526112176 | 0.600879023 |
| CLEC2L  | -2.251449442 | 0.026870624 | 1.351175448  | 0.18192306  | 0.221179494  | 0.825753799 |
| CLEC3B  | -0.360925558 | 0.719028129 | 0.389611636  | 0.698260689 | -0.32500579  | 0.746382701 |
| CLEC4A  | -1.751372733 | 0.08339838  | 0.17648499   | 0.860532039 | -0.039947738 | 0.968276276 |
| CLEC4C  | 1.672050047  | 0.098099652 | 0.426858323  | 0.671073912 | -0.058470409 | 0.953581206 |
| CLEC4D  | -1.225724512 | 0.22360289  | 0.307052404  | 0.75991091  | -0.518964027 | 0.605822164 |
| CLEC4E  | -1.899078519 | 0.060860976 | -0.158487652 | 0.874626939 | -1.275470702 | 0.207386384 |
| CLEC4F  | -0.333464463 | 0.739584327 | -0.406653016 | 0.68577001  | -0.087941344 | 0.930235706 |
| CLEC4G  | -1.777427893 | 0.078984897 | 2.328454881  | 0.023420537 | 1.37446047   | 0.174751409 |
| CLEC5A  | 0.675234468  | 0.501313643 | -0.829241865 | 0.410391104 | -0.595483131 | 0.553909532 |
| CLEC6A  | -0.721130734 | 0.472758335 | -1.573129785 | 0.121166386 | -2.998652806 | 0.004033643 |
| CLEC7A  | -0.295585972 | 0.768249089 | 0.044063305  | 0.965006352 | -1.430922756 | 0.157985973 |
| CLEC9A  | 0.595310453  | 0.553178018 | -2.674981972 | 0.009711763 | -1.155796811 | 0.252651136 |
| CLECL1  | -9.31E-05    | 0.999925914 | -1.910482341 | 0.061053656 | -2.071627317 | 0.042898789 |
| CLIC1   | -0.924461253 | 0.357797755 | -0.280021348 | 0.780464374 | -0.374361938 | 0.709542971 |
| CLIC2   | 0.746918694  | 0.457122128 | 0.207263599  | 0.836535053 | -0.435076646 | 0.66517196  |
| CLIC3   | -0.551660686 | 0.58259201  | -1.722360563 | 0.090370548 | -1.375006399 | 0.174583014 |
| CLIC4   | -0.042913477 | 0.96586863  | 0.169307723  | 0.866147832 | -1.556420317 | 0.125218455 |
| CLIC5   | 1.352488458  | 0.179716467 | -0.191828756 | 0.848551042 | 0.724891626  | 0.471523981 |
| CLINT1  | 2.044377937  | 0.043932717 | -0.134941316 | 0.893128743 | -1.59786398  | 0.115677494 |
| CLIP1   | -0.736032637 | 0.463686449 | 0.244321077  | 0.807850427 | -0.609163616 | 0.544869166 |
| CLIP2   | -1.168003447 | 0.245989369 | 1.63157567   | 0.108225306 | 1.306582885  | 0.196672683 |
| CLIP3   | 1.311057394  | 0.19328088  | 0.321335209  | 0.749119568 | 0.825805899  | 0.41240388  |
| CLIP4   | 1.043816829  | 0.299455632 | -0.747135716 | 0.458020954 | -0.650000903 | 0.518338153 |
| CLK1    | 2.19385855   | 0.030905614 | -0.96062686  | 0.340755342 | -1.679587842 | 0.098585552 |
| CLK2    | 1.538429373  | 0.12756508  | -2.618569875 | 0.011264933 | -1.537226715 | 0.129845633 |
| CLK3    | -1.110348735 | 0.269901623 | 0.835798838  | 0.406722029 | 0.995761977  | 0.323631177 |
| CLK4    | 1.947799499  | 0.054656382 | -1.194143647 | 0.237316663 | -1.347315292 | 0.18328237  |
| CLMN    | -0.349458209 | 0.727587976 | 1.648389253  | 0.104717686 | 0.992663385  | 0.325126083 |
| CLMP    | 0.704403976  | 0.483058492 | 0.03622639   | 0.971227107 | 1.262554167  | 0.211959873 |
| CLN3    | -0.924529058 | 0.357762667 | -0.369321385 | 0.713242519 | -0.349249958 | 0.72820605  |
| CLN5    | 0.374211916  | 0.70915519  | 0.151616041  | 0.880019597 | 0.370928269  | 0.712084618 |
| CLN6    | -0.957930863 | 0.340746386 | -1.41097514  | 0.163630694 | -0.70381761  | 0.484450466 |
| CLN8    | 4.452486147  | 2.50E-05    | -0.211405579 | 0.833317056 | 0.489021998  | 0.626727972 |
| CLNS1A  | 1.519797563  | 0.132180054 | 0.500559154  | 0.618588835 | 0.777100724  | 0.440356022 |
| CLOCK   | -0.180628969 | 0.857078012 | -2.029224282 | 0.04706564  | -1.735412378 | 0.088144988 |
| CLP1    | -1.336119589 | 0.184987016 | 1.809850636  | 0.07553727  | 1.695664356  | 0.095479706 |
| CLPB    | -1.499484632 | 0.137360284 | 1.658375838  | 0.102678519 | 2.004622023  | 0.049826988 |
| CLPP    | -0.206862811 | 0.836599342 | -1.850421184 | 0.069383972 | -1.575449378 | 0.120762173 |
| CLPTM1  | -0.899766918 | 0.370722699 | -0.655103071 | 0.515009356 | -0.857261364 | 0.39493904  |
| CLPTM1L | -0.95262176  | 0.343415251 | 2.795392079  | 0.007031048 | 2.94979844   | 0.004627202 |
| CLPX    | 0.515400886  | 0.607577283 | 2.64137894   | 0.010611525 | 2.186423974  | 0.032961791 |
| CLSPN   | -0.475666107 | 0.635501892 | 0.764269725  | 0.447826351 | 1.01504319   | 0.314432503 |
| CLSTN1  | 1.15692125   | 0.250464413 | 1.524497982  | 0.132856842 | 1.568709708  | 0.122325691 |
| CLSTN3  | 0.060520161  | 0.951879868 | -0.980715554 | 0.330834651 | 0.675840039  | 0.501912099 |
| CLTA    | -0.76582281  | 0.445850026 | -0.069748509 | 0.944635432 | 0.156076658  | 0.876531523 |
| CLTB    | -1.739196489 | 0.08552953  | 1.229715991  | 0.223803073 | 1.089984338  | 0.280368578 |
| CLTC    | -0.600542902 | 0.549702369 | 2.120799237  | 0.038255747 | 1.770907553  | 0.081995313 |
| CLTCL1  | -1.31485325  | 0.192007153 | 2.588353436  | 0.012186973 | 2.918550468  | 0.005048409 |
| CLU     | -3.64679649  | 0.000451133 | 2.643596451  | 0.010549881 | 1.052899909  | 0.296889924 |
| CLUAP1  | 2.177734402  | 0.032126192 | 2.226448548  | 0.029910257 | 3.347958778  | 0.001457193 |
| CLYBL   | 1.8962158    | 0.061243308 | 1.471403275  | 0.146624982 | 1.733132569  | 0.088552694 |
| CMAHP   | -0.715614313 | 0.476141632 | 0.394200084  | 0.694889098 | -0.774431472 | 0.441919529 |
| CMAS    | 2.555013664  | 0.012353054 | 0.732556361  | 0.466799826 | 1.234225077  | 0.222251887 |
| CMBL    | -3.219029869 | 0.001807182 | 2.18490259   | 0.03297868  | 0.556327274  | 0.580194172 |
| CMC1    | 0.730207158  | 0.467221055 | -1.797522698 | 0.077495251 | -0.831555921 | 0.409176658 |
| CMIP    | -2.463614689 | 0.015718423 | -1.104524703 | 0.273958521 | -1.384599944 | 0.171644098 |
| CMKLR1  | -1.54040194  | 0.127084044 | 0.441435487  | 0.660550569 | 0.625907336  | 0.533907887 |
| CMPK1   | 0.450246527  | 0.653650241 | 1.284013988  | 0.204278286 | 1.004083619  | 0.319639223 |
| CMPK2   | -1.931419781 | 0.056679625 | 0.748470059  | 0.457222262 | -2.470828677 | 0.016536133 |
| CMTM1   | -0.041919316 | 0.966658865 | -2.386456342 | 0.020318485 | -4.069909406 | 0.000148412 |
| CMTM2   | -2.413868656 | 0.017876134 | -0.002940972 | 0.99766361  | 0.089578273  | 0.928940621 |
| CMTM3   | -2.735564882 | 0.007543901 | -0.048702679 | 0.961324733 | -0.71687054  | 0.476420847 |
| CMTM4   | 1.239904953  | 0.218337263 | 0.406153744  | 0.686134729 | 1.079816038  | 0.284833503 |
| CMTM5   | -4.198035877 | 6.47E-05    | 0.825171562  | 0.412678837 | -0.253912629 | 0.800489124 |
| CMTM6   | -1.491510767 | 0.139436808 | -0.268875523 | 0.788986269 | -1.060180148 | 0.29359485  |
| CMTM7   | -1.607609804 | 0.111536167 | 0.10551533   | 0.916333526 | 0.484668829  | 0.629793757 |

|          |              |             |              |             |              |             |
|----------|--------------|-------------|--------------|-------------|--------------|-------------|
| CMTM8    | 1.298115451  | 0.197671102 | 0.206001455  | 0.837516202 | -0.347122315 | 0.729795121 |
| CN5H6.4  | -0.470665046 | 0.639055307 | 1.415193048  | 0.162396175 | 0.730445508  | 0.468150106 |
| CNBP     | -1.08088466  | 0.282729112 | 0.777530939  | 0.440027664 | 0.877182096  | 0.384119715 |
| CNDP2    | -0.746545285 | 0.457346412 | 2.135661417  | 0.036970666 | 1.645860681  | 0.105370667 |
| CNFN     | 0.736574745  | 0.463358298 | 0.694110523  | 0.490403132 | 0.676076703  | 0.501762968 |
| CNGA4    | -0.199455716 | 0.842370709 | -1.297120409 | 0.199761711 | -1.174268734 | 0.245236127 |
| CNIH     | -0.171286298 | 0.864395556 | -0.259992158 | 0.795796987 | 0.081205339  | 0.935566972 |
| CNIH2    | -1.159791036 | 0.249300069 | -2.126772931 | 0.037734611 | -0.708117413 | 0.481797116 |
| CNIH4    | 0.195032233  | 0.845821477 | -0.68677927  | 0.494977718 | -1.088878497 | 0.280851777 |
| CNKSR1   | -0.44139277  | 0.660021376 | 1.286696533  | 0.203347708 | 2.313050539  | 0.024401285 |
| CNKSR2   | 1.781174155  | 0.078366501 | 0.031503738  | 0.974976727 | -0.653031278 | 0.516397062 |
| CNN2     | -2.471232118 | 0.01540944  | 0.551642143  | 0.583327562 | 0.531150836  | 0.597405933 |
| CNN3     | 1.823112534  | 0.071713491 | 0.133664556  | 0.894133775 | 1.554442783  | 0.125689015 |
| CNNM1    | -2.443796806 | 0.016548419 | 0.953640145  | 0.344251067 | 1.248648165  | 0.216966911 |
| CNNM2    | 0.773882799  | 0.441093435 | -0.373053612 | 0.710477989 | -1.069949361 | 0.289212969 |
| CNNM3    | -0.406485902 | 0.685381648 | -1.861106052 | 0.067835518 | -1.019939213 | 0.312125086 |
| CNNM4    | -1.31822183  | 0.19088207  | -0.797980074 | 0.428159913 | -1.155621801 | 0.252722148 |
| CNO      | -1.12405298  | 0.264075813 | -2.799889507 | 0.006945588 | -3.09406159  | 0.003073609 |
| CNOT1    | -1.038225768 | 0.302035688 | 1.414091155  | 0.162717985 | 1.192341305  | 0.238134412 |
| CNOT10   | -1.379907986 | 0.171143329 | 1.843729066  | 0.070368885 | 2.32262532   | 0.023842626 |
| CNOT2    | 0.483179907  | 0.630179129 | -1.430343915 | 0.15802116  | -0.655509461 | 0.514812556 |
| CNOT3    | -1.087155515 | 0.279964404 | -1.329799871 | 0.188826701 | -1.051031604 | 0.297739607 |
| CNOT4    | -1.310424337 | 0.193493919 | -1.373126451 | 0.175035287 | -0.746990178 | 0.458181335 |
| CNOT6    | -0.462832222 | 0.644637733 | -0.833453078 | 0.408032329 | -2.013476428 | 0.048859425 |
| CNOT6L   | 0.118874356  | 0.905648358 | -0.0254745   | 0.979764545 | -0.387904139 | 0.699551415 |
| CNOT7    | 0.740866328  | 0.460765148 | -0.32497645  | 0.746376385 | -0.544027859 | 0.588572807 |
| CNOT8    | -0.535356745 | 0.593766104 | 0.7097167    | 0.480743286 | 0.242676484  | 0.809138941 |
| CNP      | -0.623642121 | 0.534490816 | 3.72390476   | 0.000448145 | 2.954572196  | 0.004565809 |
| CNPPD1   | -2.217203959 | 0.029210213 | -0.484638561 | 0.629770773 | -0.688908738 | 0.493713216 |
| CNPY2    | 0.525830488  | 0.600340881 | 1.189187016  | 0.239245618 | 1.537071691  | 0.129883554 |
| CNPY3    | -2.298523221 | 0.023923894 | 1.155958209  | 0.252470801 | 1.841455106  | 0.070831071 |
| CNPY4    | 1.920276928  | 0.058091949 | 1.120139473  | 0.267303504 | 2.523458914  | 0.014473074 |
| CNR1     | -0.315224562 | 0.753344378 | 0.064511036  | 0.948786701 | -1.578476152 | 0.120065244 |
| CNR2     | 1.099955527  | 0.274379266 | 2.275998374  | 0.026582168 | 2.268259016  | 0.027172323 |
| CNST     | 1.695819849  | 0.093488183 | 1.922293437  | 0.059519604 | 1.788466544  | 0.079087775 |
| CNTD1    | 0.128216989  | 0.898272537 | -0.738370768 | 0.463287279 | 0.671134907  | 0.504881967 |
| CNTLN    | -0.378453777 | 0.706013454 | 0.760576972  | 0.45001226  | 0.501467654  | 0.617999527 |
| CNTNAP1  | -0.894321187 | 0.373612192 | -0.523239752 | 0.602814733 | -0.321451676 | 0.749059846 |
| CNTNAP2  | 2.202106225  | 0.030297076 | 0.147286807  | 0.883420015 | 0.959980003  | 0.341174622 |
| CNTNAP3  | -2.210191644 | 0.029710701 | -1.622473494 | 0.110163644 | -2.273877976 | 0.026810045 |
| CNTNAP3B | -2.117379659 | 0.037075478 | -0.699281646 | 0.487190515 | -1.893638858 | 0.063421374 |
| CNTRL    | 2.205247636  | 0.030068062 | 2.734759532  | 0.008281733 | 2.226043068  | 0.030035666 |
| CNTROB   | 0.183650464  | 0.854714099 | 2.118289234  | 0.038476583 | 2.104821585  | 0.039787606 |
| COA5     | 0.550940106  | 0.583083752 | -2.579261292 | 0.012477554 | -1.898689926 | 0.062740386 |
| COASY    | -1.155882767 | 0.250886702 | 1.276625223  | 0.206857891 | 1.803255722  | 0.067706154 |
| COBLL1   | 2.686981977  | 0.008633642 | 1.715439349  | 0.091640254 | 0.749512683  | 0.456672245 |
| COBRA1   | -0.259925521 | 0.795534034 | 0.46428655   | 0.64419265  | 1.368263227  | 0.176671718 |
| COCH     | 1.052817815  | 0.295333532 | -0.299740252 | 0.765454363 | 0.078637074  | 0.937600442 |
| COG1     | 1.290940444  | 0.200136805 | 0.402699322  | 0.688660233 | 1.615442204  | 0.111812025 |
| COG2     | 0.987357441  | 0.326199572 | 2.441820453  | 0.017706014 | 2.92111399   | 0.005012558 |
| COG3     | 0.778891854  | 0.438152311 | 0.845371817  | 0.401401499 | -0.135856619 | 0.892419777 |
| COG4     | -0.284856365 | 0.776429704 | 1.125055849  | 0.265231947 | 4.054469393  | 0.000156189 |
| COG5     | 0.706139442  | 0.481984078 | -1.324657892 | 0.190516613 | -0.281218952 | 0.779574608 |
| COG6     | 1.372149312  | 0.173536978 | -0.940170807 | 0.351056346 | -1.085066169 | 0.282522027 |
| COG7     | 0.840188366  | 0.403100879 | 0.78536237   | 0.43545993  | 1.034517817  | 0.305322425 |
| COG8     | -0.341757094 | 0.733356051 | -1.98256689  | 0.052192757 | -2.018858052 | 0.048279296 |
| COIL     | 0.488076957  | 0.626720526 | -0.944298061 | 0.348961845 | -0.758819945 | 0.451129053 |
| COL11A2  | 0.896410759  | 0.372501797 | 1.688708847  | 0.096682821 | 1.039916003  | 0.302829335 |
| COL13A1  | -0.479917899 | 0.632487553 | -0.032329861 | 0.974320771 | 0.306280862  | 0.760521879 |
| COL17A1  | -2.451153915 | 0.016235831 | 0.183769812  | 0.854839484 | 0.342098047  | 0.733552314 |
| COL18A1  | 0.161474166  | 0.872093546 | -1.224797013 | 0.225637371 | -0.650718146 | 0.517878377 |
| COL19A1  | 1.338159334  | 0.18432397  | 0.066297182  | 0.94737082  | -0.272004976 | 0.786614344 |
| COL1A1   | 1.152150027  | 0.252408759 | 2.715335371  | 0.008723698 | 3.587179719  | 0.000700904 |
| COL1A2   | 1.26801407   | 0.208168546 | 3.047526394  | 0.003479978 | 3.364779971  | 0.001385318 |
| COL24A1  | 2.599083843  | 0.010975061 | -0.369769944 | 0.712910058 | -1.031086714 | 0.306914288 |
| COL27A1  | 1.029071153  | 0.306292592 | 0.84434379   | 0.401970799 | 1.097441645  | 0.277125242 |
| COL4A1   | 0.581111699  | 0.562664389 | 2.938909352  | 0.004732122 | 2.921403485  | 0.005008524 |
| COL4A3   | 0.657583938  | 0.51253785  | -0.665496384 | 0.508389451 | -1.511790229 | 0.136186676 |
| COL4A3BP | -0.694371837 | 0.48929517  | -1.147685163 | 0.255843332 | -2.349496801 | 0.022335125 |
| COL4A4   | 1.693828274  | 0.093867644 | 0.111237341  | 0.911814876 | 0.35488461   | 0.724003509 |
| COL5A1   | 1.688634313  | 0.094863181 | -1.383438887 | 0.171869207 | 0.012299611  | 0.990230109 |
| COL5A2   | 2.701030862  | 0.008304656 | 0.943571346  | 0.349330046 | 0.859174911  | 0.393891612 |

|          |              |             |              |             |              |             |
|----------|--------------|-------------|--------------|-------------|--------------|-------------|
| COL5A3   | 2.917517066  | 0.004486672 | 1.313196726  | 0.19432441  | 0.811225825  | 0.420656169 |
| COL6A1   | 3.324338612  | 0.001297539 | -0.81315584  | 0.41947743  | 0.300469127  | 0.764927332 |
| COL6A2   | 2.38665007   | 0.019165225 | -3.129672161 | 0.0027465   | -1.097234248 | 0.277215086 |
| COL6A3   | 2.530115753  | 0.013198738 | 0.83192674   | 0.408886299 | 1.426258637  | 0.159321711 |
| COL6A4P2 | 0.241974938  | 0.809367816 | -0.229356236 | 0.819404565 | -0.520830113 | 0.604529912 |
| COL7A1   | -0.902589642 | 0.369230537 | 1.875918206  | 0.065737261 | 2.276983905  | 0.026611636 |
| COL8A2   | 1.236507408  | 0.219590543 | 1.093521131  | 0.278717495 | 1.303505832  | 0.197713378 |
| COL9A2   | 0.923259849  | 0.358419812 | 0.396617658  | 0.693115147 | 0.266682685  | 0.790688941 |
| COL9A3   | -2.573656935 | 0.011752125 | -1.044370191 | 0.300677678 | 0.055980667  | 0.955555628 |
| COLEC12  | 1.962443724  | 0.052899716 | 1.751596378  | 0.085166483 | 1.754272414  | 0.084831457 |
| COLQ     | 2.260069763  | 0.026308278 | -0.984433158 | 0.329019968 | 0.487758531  | 0.627617109 |
| COMMD1   | 0.673993501  | 0.502098439 | 0.612933213  | 0.542333257 | 1.700785538  | 0.094507397 |
| COMMD10  | 0.175987536  | 0.860711843 | -1.661491183 | 0.102049068 | -1.487983596 | 0.142341467 |
| COMMD2   | -0.387473181 | 0.699350204 | -0.587070752 | 0.559450509 | -0.987259133 | 0.32774437  |
| COMMD3   | 0.568808775  | 0.570948215 | -0.397242141 | 0.692657198 | 0.180854023  | 0.857132364 |
| COMMD4   | -0.380617707 | 0.704412696 | 3.118942964  | 0.002833315 | 3.23511446   | 0.002038566 |
| COMMD5   | -0.772071269 | 0.442159923 | 1.268122775  | 0.209856247 | 1.163579186  | 0.249507796 |
| COMMD6   | 0.330808939  | 0.74158249  | -0.010340227 | 0.991785573 | 0.773261688  | 0.442605753 |
| COMMD7   | 0.782781505  | 0.435876391 | 0.148305413  | 0.882619745 | 1.299544911  | 0.19905909  |
| COMMD8   | 0.783935996  | 0.43520221  | 0.31702029   | 0.752374497 | 0.134213457  | 0.893712962 |
| COMMD9   | -1.284447268 | 0.202387822 | -0.01720521  | 0.986332368 | 1.292156954  | 0.201587477 |
| COMT     | -0.390832002 | 0.696874786 | 2.448742643  | 0.017401567 | 2.77014698   | 0.007578754 |
| COMTD1   | 0.333515683  | 0.739545803 | -2.920470792 | 0.004982338 | -1.865021965 | 0.067398986 |
| COPA     | -0.47568971  | 0.635485141 | 0.303615827  | 0.762514675 | 0.467322794  | 0.642074702 |
| COPB1    | 1.051847425  | 0.295776064 | 1.778853873  | 0.080540959 | 1.732038837  | 0.088748843 |
| COPB2    | 0.661086076  | 0.510300243 | 2.420053423  | 0.018694811 | 2.373672601  | 0.021052186 |
| COPE     | -1.9309066   | 0.056744025 | 0.386625448  | 0.700458233 | 0.828533443  | 0.410871108 |
| COPG     | -1.30558975  | 0.195126668 | 1.796162943  | 0.077713789 | 1.818650818  | 0.074291031 |
| COPG2    | 1.105141528  | 0.2721386   | 1.829465096  | 0.072507506 | 2.245736249  | 0.028668367 |
| COP52    | 0.41202622   | 0.681331442 | -0.284692031 | 0.77690122  | -0.559492196 | 0.578047478 |
| COP53    | -2.224116885 | 0.028724058 | -1.34231359  | 0.184761488 | -0.143520747 | 0.886391969 |
| COP54    | 0.689869828  | 0.492108208 | -0.40737848  | 0.685240194 | 0.782959365  | 0.436935782 |
| COP55    | -0.073636262 | 0.94146849  | -0.117516765 | 0.90685941  | -0.282913835 | 0.77828167  |
| COP56    | -1.487725666 | 0.140431075 | -0.257614127 | 0.797622918 | 0.525574275  | 0.601250345 |
| COP57A   | -2.199731119 | 0.030471235 | -1.346036961 | 0.183564832 | -1.038174675 | 0.303632024 |
| COP57B   | 0.86209206   | 0.39100178  | 1.025202636  | 0.309554142 | 2.625940839  | 0.011111108 |
| COP58    | 1.781072198  | 0.078383278 | -0.431170924 | 0.667953598 | -0.390467251 | 0.697666261 |
| COPZ1    | -1.842988839 | 0.068728708 | 0.500459212  | 0.618658751 | 1.972909268  | 0.053428899 |
| COPZ2    | -0.404962071 | 0.686497254 | 0.809897878  | 0.421332396 | 0.156239588  | 0.876403696 |
| COQ10A   | 0.584779237  | 0.560206423 | 0.137071563  | 0.89145226  | 1.180755309  | 0.242669836 |
| COQ10B   | -1.642557667 | 0.104076463 | -1.190139112 | 0.23887421  | -1.952982404 | 0.055804607 |
| COQ2     | -0.613595182 | 0.541080406 | -0.742939154 | 0.460538102 | -0.759642583 | 0.450640996 |
| COQ3     | 1.400940973  | 0.164780926 | 0.989164465  | 0.326720055 | 1.487343699  | 0.14250988  |
| COQ4     | 0.899976198  | 0.370611938 | 0.794187638  | 0.430346324 | 1.463805425  | 0.148814681 |
| COQ5     | 0.822062684  | 0.413283655 | -0.164261133 | 0.870100668 | 0.70422852   | 0.484196549 |
| COQ6     | 1.901379024  | 0.06055519  | 0.177177759  | 0.859990365 | 0.174236043  | 0.862305685 |
| COQ7     | 0.619400998  | 0.537267453 | -1.050810129 | 0.297734795 | 1.783608542  | 0.079883451 |
| COQ9     | -0.020838971 | 0.983421727 | 1.417258155  | 0.161794385 | 0.10846301   | 0.914014493 |
| CORIN    | 1.408542032  | 0.162526734 | -0.062315132 | 0.950527626 | -1.511555087 | 0.13624642  |
| CORO1A   | -1.881774331 | 0.063203031 | 0.790240896  | 0.432628741 | 0.918446122  | 0.362307871 |
| CORO1B   | -1.165024237 | 0.247186746 | -0.706959153 | 0.482442368 | -0.745825115 | 0.458879303 |
| CORO1C   | -4.02036435  | 0.000123121 | 2.125577164  | 0.037838429 | 1.63874543   | 0.106849637 |
| CORO2A   | -0.016724602 | 0.986694532 | 0.175364391  | 0.861408373 | 0.304746542  | 0.761684167 |
| CORO2B   | -0.120264167 | 0.90455059  | 0.981335303  | 0.330531671 | 0.893309338  | 0.375498492 |
| CORO6    | -0.068667915 | 0.945411196 | -0.782913132 | 0.436885439 | -0.706459319 | 0.482819341 |
| CORO7    | -2.022768403 | 0.046160915 | 0.935734308  | 0.353316884 | 1.80790284   | 0.075970301 |
| COTL1    | -3.415373113 | 0.000969034 | 0.555535236  | 0.580680119 | 0.510142263  | 0.61194829  |
| COX10    | 0.369461741  | 0.71267939  | -0.070363942 | 0.944147734 | 0.533184825  | 0.596006588 |
| COX11    | 1.399802478  | 0.165120613 | -2.777029032 | 0.007390131 | -2.338842757 | 0.029140593 |
| COX15    | -0.866405438 | 0.388645875 | 3.34544038   | 0.001450401 | 3.517740968  | 0.00086918  |
| COX16    | 0.81883845   | 0.415111092 | -0.733510245 | 0.466222537 | -0.599269949 | 0.551399587 |
| COX17    | -0.067185379 | 0.946587952 | -2.201899535 | 0.031691407 | -1.594759359 | 0.116371285 |
| COX18    | -0.329127595 | 0.742848544 | -0.515483995 | 0.608187872 | -0.133173418 | 0.894531633 |
| COX19    | 2.245919778  | 0.027236886 | 0.400323052  | 0.69039958  | 1.358419637  | 0.179755038 |
| COX4I1   | 0.17733112   | 0.859659624 | 1.150342581  | 0.254756543 | 1.53539014   | 0.130295448 |
| COX4NB   | -0.998850882 | 0.320631026 | 0.904519458  | 0.369487981 | 0.244063506  | 0.808069862 |
| COX5A    | 0.29326876   | 0.770013623 | -3.37458035  | 0.001328184 | -2.219256634 | 0.030520011 |
| COX5B    | 0.410950619  | 0.682117026 | -2.58796845  | 0.012199152 | -1.127152489 | 0.264464462 |
| COX6A1   | -0.306355194 | 0.760064591 | -1.408204463 | 0.164445571 | -0.485001937 | 0.629558929 |
| COX6B1   | -2.499713752 | 0.014301769 | -1.743802384 | 0.08652893  | -0.478107561 | 0.634427017 |
| COX6C    | 0.919131419  | 0.360562683 | 0.61714972   | 0.539568142 | 1.533209505  | 0.130831142 |
| COX7A2   | 0.556389047  | 0.579370146 | -1.818478743 | 0.0741917   | -0.963290771 | 0.339525608 |



|          |              |             |              |             |              |             |
|----------|--------------|-------------|--------------|-------------|--------------|-------------|
| COX7A2L  | 0.568536476  | 0.571132226 | 0.702944998  | 0.484921693 | 0.700912829  | 0.486247562 |
| COX7B    | -0.495542768 | 0.621463752 | -1.305196025 | 0.197016301 | -0.488362827 | 0.627191779 |
| COX7C    | 0.602251622  | 0.548569729 | -0.410958711 | 0.682627829 | 0.042272999  | 0.966430803 |
| COX8A    | -1.687821291 | 0.09501979  | 0.325000249  | 0.746358466 | 0.402379165  | 0.688930403 |
| CPA3     | -2.974140407 | 0.003799493 | 1.311318798  | 0.194953751 | -2.00001701  | 0.050333669 |
| CPA5     | -1.138787794 | 0.257910946 | 0.905135612  | 0.369164276 | -0.834730876 | 0.407401333 |
| CPAMD8   | -0.071031812 | 0.943535115 | 2.337582345  | 0.022905977 | 1.390342016  | 0.169903331 |
| CPD      | -2.008284289 | 0.047708003 | 0.09560872   | 0.924163215 | -0.79469069  | 0.43013452  |
| CPEB2    | -1.130383116 | 0.261414808 | -1.537960834 | 0.12953419  | -3.690191043 | 0.000507353 |
| CPEB3    | -0.442738054 | 0.659051682 | -0.236431204 | 0.8139369   | -2.931285765 | 0.00487262  |
| CPEB4    | -1.275780829 | 0.205421422 | -0.935686123 | 0.353341487 | -3.109670754 | 0.002938566 |
| CPLX1    | 0.30472156   | 0.761304405 | -1.815943926 | 0.074584908 | -1.83786851  | 0.071366083 |
| CPM      | -3.302430159 | 0.001390916 | 0.791270263  | 0.432032762 | 1.094488723  | 0.278406376 |
| CPNE1    | -1.471118441 | 0.144859135 | 2.763131423  | 0.007673033 | 3.516892278  | 0.000871457 |
| CPNE2    | -2.248932132 | 0.02703682  | -0.161041391 | 0.87262434  | -0.637193032 | 0.52658475  |
| CPNE3    | -0.432655859 | 0.666333112 | -0.781327444 | 0.437809813 | -1.334864245 | 0.187299841 |
| CPNE5    | -2.586664142 | 0.01134862  | 1.590270215  | 0.117248374 | 0.950309476  | 0.346021377 |
| CPNE7    | 1.633695003  | 0.105928974 | -1.817339623 | 0.074368188 | 0.116311109  | 0.907820344 |
| CPNE8    | -0.34610686  | 0.730096203 | -0.010578813 | 0.991596044 | -1.151453862 | 0.254417545 |
| CPOX     | 2.466735989  | 0.015591151 | 1.045579576  | 0.300123508 | -0.759523075 | 0.450711879 |
| CPPED1   | -4.156699029 | 7.52E-05    | -1.026156452 | 0.309108273 | -1.236868545 | 0.221276233 |
| CPSF1    | 1.063786032  | 0.290363001 | 0.137791804  | 0.89088555  | 0.986124232  | 0.328295994 |
| CPSF2    | 0.051963904  | 0.958676324 | 1.679385136  | 0.098494405 | 1.910535721  | 0.061167645 |
| CPSF3    | 0.505997313  | 0.614135526 | 2.565182018  | 0.012939959 | 3.518548416  | 0.000867019 |
| CPSF3L   | -0.079430512 | 0.936872226 | -0.348545329 | 0.728701529 | 0.331363473  | 0.741601613 |
| CPSF4    | 0.712485725  | 0.478066421 | 0.78569471   | 0.435266713 | 0.259851242  | 0.044052192 |
| CPSF6    | 2.621058084  | 0.010341255 | -0.492823052 | 0.624011242 | -1.167782318 | 0.247821848 |
| CPSF7    | -1.531200878 | 0.129340163 | -1.965495715 | 0.054184959 | -1.499288392 | 0.139391989 |
| CPT1A    | -1.280931094 | 0.203614596 | 4.215595576  | 8.89E-05    | 2.382775923  | 0.020586449 |
| CPT1B    | 0.695944309  | 0.488314705 | 1.398840226  | 0.167222891 | 1.963325358  | 0.05456046  |
| CPT2     | -2.748173769 | 0.007282367 | 1.430460605  | 0.157987823 | 1.998020076  | 0.05055911  |
| CPVL     | -1.689342406 | 0.094726954 | 1.646153589  | 0.105178679 | 1.01602293   | 0.313969848 |
| CPXM1    | 0.948381595  | 0.345556495 | -1.001143151 | 0.32094518  | 0.763780735  | 0.448190564 |
| CR1      | -1.016803332 | 0.312060277 | 0.486354923  | 0.628561015 | -0.522301565 | 0.603511839 |
| CR1L     | -2.972922141 | 0.003813193 | -1.08009084  | 0.284603828 | -1.183860369 | 0.241448263 |
| CR2      | -0.362006085 | 0.71822339  | 1.287314233  | 0.203133876 | 1.402903721  | 0.166142542 |
| CRABP2   | -1.356169984 | 0.178546858 | -0.646555827 | 0.52048767  | -0.777639912 | 0.44004059  |
| CRADD    | -1.844830589 | 0.068457471 | -0.904141075 | 0.36968686  | -0.985334807 | 0.328680063 |
| CRAMP1L  | 1.698582425  | 0.092963894 | 0.477663825  | 0.6346973   | 0.688854377  | 0.493747167 |
| CRAT     | -1.93588182  | 0.056122281 | 2.063914787  | 0.043540907 | 0.88731685   | 0.378687501 |
| CRB2     | 1.516916076  | 0.132905384 | 0.673245809  | 0.503483499 | 1.494503684  | 0.140634394 |
| CRB3     | 0.800989667  | 0.425315012 | 0.382222919  | 0.703702759 | 0.481334974  | 0.632146116 |
| CRBN     | 0.640391928  | 0.523597285 | -0.231082536 | 0.818069607 | -0.594604218 | 0.554492905 |
| CRCP     | -2.241648253 | 0.027522806 | 2.170649414  | 0.034093331 | 2.309406828  | 0.024616925 |
| CREB1    | -1.14742441  | 0.254345044 | -0.831850225 | 0.408929137 | -2.160418621 | 0.035016064 |
| CREB3    | -0.492889938 | 0.623329413 | 2.367025578  | 0.021314123 | 3.232144778  | 0.002056482 |
| CREB3L2  | 0.890825885  | 0.375474243 | 0.263084236  | 0.793424504 | 0.116677541  | 0.907531273 |
| CREB3L4  | 0.993837628  | 0.323052119 | -0.664007132 | 0.509335195 | -0.268412075 | 0.789364318 |
| CREB5    | -0.580588941 | 0.56301517  | -1.098731682 | 0.276456817 | -2.506836751 | 0.015097989 |
| CREBBP   | -2.262743479 | 0.026135973 | -0.864802237 | 0.390734965 | -1.05872147  | 0.294253029 |
| CREBL2   | 0.932483295  | 0.35366187  | 0.422912442  | 0.673934001 | 0.335078665  | 0.738812444 |
| CREBZF   | 2.116659944  | 0.037138277 | -0.583795223 | 0.561637492 | -1.156915995 | 0.252197356 |
| CREG1    | -2.4898192   | 0.014678205 | 1.388264832  | 0.170402755 | 0.466482323  | 0.642672351 |
| CRELD1   | 0.737815342  | 0.462607829 | 0.917639302  | 0.362634421 | 2.324894559  | 0.023711904 |
| CRELD2   | -0.07431417  | 0.940930637 | 2.493380903  | 0.015548934 | 2.090482224  | 0.041106625 |
| CREM     | -2.511291334 | 0.013872318 | 0.061710154  | 0.9510073   | -0.411509633 | 0.682263023 |
| CRHBP    | -0.161093956 | 0.872392088 | -1.940678091 | 0.057197105 | -0.745376774 | 0.459148059 |
| CRHM1    | 1.588833832  | 0.115717785 | -0.678978021 | 0.499871161 | -1.125318694 | 0.265233852 |
| CRIP1    | -0.65407333  | 0.51478608  | 0.238637648  | 0.812233608 | 0.852818164  | 0.397377798 |
| CRIP2    | 1.262385603  | 0.210176218 | -0.00101551  | 0.99919325  | 0.665406489  | 0.508510528 |
| CRIP3    | 1.816802068  | 0.072683424 | 0.490611827  | 0.625565006 | 1.628347767  | 0.109041218 |
| CRIPAK   | 0.557148307  | 0.578853587 | 1.594253277  | 0.116352683 | 2.28788515   | 0.025925523 |
| CRIPT    | 0.138276269  | 0.890340939 | -1.220865331 | 0.227111405 | -0.991348721 | 0.32576173  |
| CRISP3   | -2.213417294 | 0.029479553 | 0.841208293  | 0.403710241 | 0.409370494  | 0.683822837 |
| CRISPLD2 | -4.704763672 | 9.47E-06    | 0.690106568  | 0.492898641 | -0.505924807 | 0.614886945 |
| CRK      | -1.596036962 | 0.114098978 | -0.7268875   | 0.470238999 | -3.260375117 | 0.001892012 |
| CRKL     | -1.643632921 | 0.103853501 | 1.073921468  | 0.287336521 | 0.532244651  | 0.596653219 |
| CRLF3    | -0.33971315  | 0.734889539 | 0.24117552   | 0.810275592 | 0.112803679  | 0.910587912 |
| CRLS1    | 0.209146737  | 0.834821569 | -0.052228694 | 0.958527193 | 0.041522829  | 0.967026165 |
| CRNKL1   | -1.796444472 | 0.075887162 | 2.022079491  | 0.047821424 | 1.936426832  | 0.057846553 |
| CROCC    | 2.101424444  | 0.038489439 | 0.261482625  | 0.794653142 | 1.06703251   | 0.29051653  |
| CROCCP2  | 2.243088816  | 0.027426087 | 0.810691527  | 0.420880066 | -0.335048853 | 0.738834811 |

|            |              |             |              |             |              |             |
|------------|--------------|-------------|--------------|-------------|--------------|-------------|
| CROCCP3    | 3.808341108  | 0.000259738 | -0.718522283 | 0.475340125 | 0.711446495  | 0.479748372 |
| CROT       | 1.184452772  | 0.239452662 | 0.03858585   | 0.969354018 | 0.661720497  | 0.510852755 |
| CRTAM      | 2.260496542  | 0.026280708 | -2.388915056 | 0.020195513 | -1.10923089  | 0.272051576 |
| CRTAP      | -0.631021552 | 0.529677169 | -1.038075916 | 0.303573158 | -1.257291947 | 0.213844428 |
| CRTC1      | 0.556261592  | 0.579456881 | -1.399230274 | 0.16710649  | -0.515952613 | 0.607910222 |
| CRTC2      | -1.467403367 | 0.145864443 | -1.265953225 | 0.210626476 | -0.804141878 | 0.424701357 |
| CRTC3      | 0.658210916  | 0.512136876 | 0.363760191  | 0.717368969 | 0.998362681  | 0.322380031 |
| CRX        | -0.522098788 | 0.602925503 | 2.740799345  | 0.008148554 | 3.053538187  | 0.003451803 |
| CRY1       | -0.212773705 | 0.832000161 | -0.027143594 | 0.978439034 | -1.107256258 | 0.272896804 |
| CRY2       | 1.113695733  | 0.26847057  | 1.328020009  | 0.189410364 | 2.197078477  | 0.032151219 |
| CRYB2P1    | 0.464492917  | 0.643452444 | -0.968061314 | 0.337061308 | -0.951117628 | 0.345614624 |
| CRYGS      | 0.777591577  | 0.438914679 | 0.877727282  | 0.383738428 | 2.131915876  | 0.037395722 |
| CRYL1      | -0.100889696 | 0.919869664 | 0.195654351  | 0.84556934  | 2.029428233  | 0.047157129 |
| CRYM       | -1.223694338 | 0.224364253 | 0.174138525  | 0.86236723  | 0.282525345  | 0.778577973 |
| CRYZ       | 2.151443183  | 0.034206593 | -0.720083655 | 0.474385639 | -1.653090477 | 0.103885015 |
| CRYZL1     | 2.290608678  | 0.024398459 | -0.905862081 | 0.368782847 | 0.339380816  | 0.735587024 |
| CS         | 0.250020349  | 0.803159766 | 0.623054297  | 0.535708231 | 0.792302315  | 0.431514047 |
| CSAD       | 0.091793012  | 0.927073071 | 0.466753148  | 0.642437281 | 0.795647533  | 0.429582585 |
| CSDA       | -3.465784046 | 0.000822604 | 0.218510011  | 0.82780416  | 0.341821872  | 0.733759031 |
| CSDC2      | 0.503978459  | 0.615547645 | -0.636082076 | 0.527242555 | 0.311113979  | 0.756864302 |
| CSD1E1     | -0.987213177 | 0.326269872 | -0.127622499 | 0.898892267 | -0.249612179 | 0.803796796 |
| CSE1L      | 1.445124707  | 0.152007458 | 2.268133723  | 0.027087464 | 3.730424393  | 0.000446635 |
| CSF1       | -0.852906083 | 0.396604835 | -0.293574119 | 0.770138615 | -1.037010245 | 0.304169594 |
| CSF1R      | -0.073222265 | 0.941796969 | -0.002897505 | 0.997698141 | -0.273053328 | 0.785812457 |
| CSF2RA     | -0.945894084 | 0.346816684 | 0.461679583  | 0.64605013  | 0.925061817  | 0.358886394 |
| CSF2RB     | -0.931409379 | 0.354213755 | -0.524770595 | 0.601756771 | -2.278087412 | 0.026541457 |
| CSF3R      | -1.784926812 | 0.077751074 | 0.007659338  | 0.99391526  | -0.272101025 | 0.786540866 |
| CSGALNACT1 | 1.078598298  | 0.283741796 | -0.485889682 | 0.628888834 | -0.620590795 | 0.537375935 |
| CSGALNACT2 | -0.166298858 | 0.868306804 | 0.32759944   | 0.744402355 | -0.903076059 | 0.370337584 |
| CSK        | -0.781074568 | 0.436874302 | -0.133802015 | 0.894025563 | -0.166066063 | 0.868700566 |
| CSMD1      | -0.911677924 | 0.3644521   | 0.19675559   | 0.844711444 | 0.464555809  | 0.644043167 |
| CSNK1A1    | 0.059992166  | 0.95229917  | 0.664455875  | 0.509050123 | -1.165909416 | 0.248572087 |
| CSNK1A1L   | -0.315362969 | 0.753239657 | -0.326441351 | 0.745273707 | -1.359171113 | 0.179518214 |
| CSNK1D     | -0.976190594 | 0.331670771 | 0.205477295  | 0.837923743 | -0.084257811 | 0.933150686 |
| CSNK1E     | 1.227556358  | 0.222917518 | -2.521940591 | 0.014459002 | -2.053078058 | 0.044727691 |
| CSNK1G1    | -0.899639623 | 0.37079008  | 0.358790496  | 0.7210637   | 0.612198284  | 0.542874034 |
| CSNK1G2    | -0.439927363 | 0.661078318 | -2.734866904 | 0.008279348 | -3.254193274 | 0.00192693  |
| CSNK1G3    | 0.65534629   | 0.51397026  | -0.980664086 | 0.330859821 | -2.003211271 | 0.049982662 |
| CSNK2A1    | -1.161978223 | 0.24841526  | 0.49407614   | 0.623131494 | 0.498134898  | 0.602033158 |
| CSNK2A2    | 1.893734958  | 0.061576274 | 2.686639369  | 0.009416298 | 2.846381766  | 0.026160781 |
| CSNK2B     | -1.944630328 | 0.05504299  | 0.81152666   | 0.42040441  | 1.433955532  | 0.157122112 |
| CSPG4      | -0.02645579  | 0.978954254 | 2.623453286  | 0.01112203  | 1.078572106  | 0.285383089 |
| CSPP1      | 2.013582286  | 0.047137041 | -1.473948361 | 0.14594038  | -0.313657782 | 0.754941456 |
| CSRNP1     | -0.490962938 | 0.624686162 | 0.820087608  | 0.415547166 | -1.110312032 | 0.271589581 |
| CSRNP2     | 0.75059726   | 0.454938482 | -0.952970305 | 0.344587444 | 0.75013996   | 0.456297422 |
| CSRP1      | -1.593610749 | 0.114642199 | 3.153475941  | 0.002562716 | 2.715979212  | 0.008762632 |
| CSRP2BP    | 0.128500404  | 0.898048923 | 2.408838534  | 0.019223373 | 3.165806675  | 0.002497485 |
| CST3       | -0.909695214 | 0.365491202 | 0.662153416  | 0.51051371  | 0.522223154  | 0.60356607  |
| CST7       | -0.793070815 | 0.429889431 | -0.223101904 | 0.82424552  | -1.80939533  | 0.857065561 |
| CSTA       | -0.986815597 | 0.326463663 | -2.389829167 | 0.020149964 | -1.624493832 | 0.109862752 |
| CSTB       | -1.817296397 | 0.072607053 | -2.878970328 | 0.005591067 | -2.815056324 | 0.006710834 |
| CSTF1      | 0.539667468  | 0.59080201  | 0.257988443  | 0.79733543  | 0.791099786  | 0.432209624 |
| CSTF2      | 1.215704628  | 0.227378889 | 2.117947265  | 0.038506756 | 2.223508107  | 0.030215786 |
| CSTF2T     | 0.318039557  | 0.75121543  | 0.158966683  | 0.874251228 | -0.605023597 | 0.547597025 |
| CSTF3      | 1.307569165  | 0.194456936 | 0.338909974  | 0.735910062 | 1.127896899  | 0.264152588 |
| CTAG2      | -0.539544876 | 0.590886209 | -0.943817529 | 0.349205285 | 0.167407956  | 0.86764961  |
| CTAGE5     | -0.651884965 | 0.516190164 | 1.476255101  | 0.145322063 | 2.080948658  | 0.042004487 |
| CTAGE7P    | 1.600205057  | 0.11317057  | -1.327173269 | 0.189688511 | -0.253198295 | 0.801038298 |
| CTBP1      | 0.597658277  | 0.551671723 | -2.2457184   | 0.028574598 | -1.241113675 | 0.219716039 |
| CTBP2      | -1.548403356 | 0.125147509 | -1.252458151 | 0.215464644 | -3.330184657 | 0.001536965 |
| CTBS       | -1.448208119 | 0.151145494 | -1.155503302 | 0.252655415 | -1.994589405 | 0.050943194 |
| CTC1       | 0.842037239  | 0.402070869 | 0.930190469  | 0.356154891 | 1.67372725   | 0.099738174 |
| CTCF       | -0.764418131 | 0.446682026 | 1.607575134  | 0.113396949 | 1.610778312  | 0.11282728  |
| CTDNEP1    | -1.904066747 | 0.060199576 | 0.063350619  | 0.949706656 | -0.000360072 | 0.999713978 |
| CTDP1      | -0.993594838 | 0.323169679 | 0.872499238  | 0.386558924 | 0.310576863  | 0.757270503 |
| CTDSP1     | -1.375427375 | 0.172522567 | -0.581594194 | 0.56310944  | 0.101081197  | 0.919845529 |
| CTDSP2     | -1.327830763 | 0.187699882 | -0.085876148 | 0.931862706 | -0.026466034 | 0.978979319 |
| CTDSPL     | -4.94794162  | 3.62E-06    | 2.795399643  | 0.007030903 | 1.690371513  | 0.096493234 |
| CTDSPL2    | 0.312509696  | 0.755399408 | -1.296729896 | 0.199895194 | -2.594238024 | 0.012066106 |
| CTGF       | -0.088161259 | 0.929950687 | -0.707504973 | 0.482105791 | 0.035169497  | 0.972069123 |
| CTH        | -0.887523956 | 0.377238624 | 0.53405465   | 0.595359075 | 0.786905431  | 0.434640972 |
| CTIF       | -1.243573855 | 0.216989767 | 2.502287051  | 0.015201337 | 1.801962846  | 0.076911934 |

|           |              |             |              |             |              |             |
|-----------|--------------|-------------|--------------|-------------|--------------|-------------|
| CTLA4     | 0.974510016  | 0.332499365 | 1.207085198  | 0.232333346 | 0.881555171  | 0.381769772 |
| CTNNA1    | -1.604719267 | 0.112171908 | 1.898017072  | 0.062708995 | 1.589265003  | 0.117607334 |
| CTNNAL1   | -3.105771627 | 0.002560638 | 1.290784064  | 0.201935833 | 2.490425077  | 0.015738826 |
| CTNNB1    | 1.713674909  | 0.090141837 | 3.46184691   | 0.001017882 | 2.493313396  | 0.015624292 |
| CTNNBIP1  | 0.783314194  | 0.435565244 | 0.799093659  | 0.427519172 | 1.589435765  | 0.11756876  |
| CTNNBL1   | -1.144979335 | 0.255351011 | 2.434372676  | 0.018038918 | 2.414947483  | 0.019013541 |
| CTNND1    | 0.226638534  | 0.821235339 | 1.316791066  | 0.193124125 | 0.702690573  | 0.485147289 |
| CTNS      | -0.572619397 | 0.568376134 | -0.855560948 | 0.395785866 | -0.806170105 | 0.423540788 |
| CTPS      | 1.508534594  | 0.135033005 | 1.536759401  | 0.129827988 | 1.920567306  | 0.059862112 |
| CTPS2     | 1.476735648  | 0.143349371 | -0.544341918 | 0.588307485 | -0.466988972 | 0.64231205  |
| CTR9      | -0.026916296 | 0.978588008 | 1.819955866  | 0.073963367 | 1.659323275  | 0.102617995 |
| CTRC      | -0.228546009 | 0.819756979 | 1.511490075  | 0.13613119  | 1.440016673  | 0.155406668 |
| CTRL      | -0.214584331 | 0.830592501 | 0.237642392  | 0.813001796 | 1.03624375   | 0.304523807 |
| CTSA      | -2.573278805 | 0.011764047 | 0.167939398  | 0.867223539 | -0.545810311 | 0.587355011 |
| CTSB      | -2.535157748 | 0.01302339  | 2.073716666  | 0.042587396 | 1.400417006  | 0.16688188  |
| CTSC      | -0.217643037 | 0.828215787 | 0.561017638  | 0.576961708 | -0.723186402 | 0.472562628 |
| CTSD      | -2.840576519 | 0.005604525 | 2.087019324  | 0.04132235  | 2.273025212  | 0.026864749 |
| CTSE      | -2.339753331 | 0.021581089 | 0.941976411  | 0.350139033 | 0.64574549   | 0.52107046  |
| CTSF      | 2.421324916  | 0.017536756 | 1.881681997  | 0.064935743 | 1.861251651  | 0.067938437 |
| CTSG      | -3.752756546 | 0.0003146   | 1.156456094  | 0.252268855 | -0.582146289 | 0.562794817 |
| CTSH      | 0.135663044  | 0.892400389 | 2.528383302  | 0.014222889 | 1.797599092  | 0.077609902 |
| CTSK      | 1.657970143  | 0.100917307 | 0.668764707  | 0.506317232 | 1.795205263  | 0.077995032 |
| CTSL1     | -0.980304933 | 0.329647968 | -0.019713751 | 0.984339856 | -0.098532823 | 0.921859584 |
| CTSO      | 1.729891736  | 0.087188111 | -0.825200656 | 0.412662457 | -0.463341636 | 0.644907755 |
| CTSS      | -2.03659115  | 0.044724747 | 0.116567279  | 0.907608472 | -0.074093457 | 0.941198946 |
| CTSW      | 0.277233777  | 0.782241542 | -1.857607799 | 0.068339243 | -0.144229364 | 0.885834979 |
| CTSZ      | -2.350939291 | 0.020981565 | 0.659582532  | 0.51215059  | -0.023621614 | 0.981238049 |
| CTTN      | -3.543009977 | 0.000638137 | 2.269942409  | 0.02697051  | 1.02518963   | 0.309663412 |
| CTTNBP2NL | 0.151034346  | 0.880297517 | 0.511927279  | 0.610659247 | -0.797793385 | 0.428346334 |
| CTU1      | -0.26921111  | 0.788403285 | -2.443617149 | 0.017626536 | -2.763909895 | 0.007707015 |
| CTU2      | -0.019005719 | 0.984879969 | 1.695387504  | 0.095402052 | 0.970009559  | 0.336195301 |
| CUBN      | 3.150910753  | 0.002230774 | -0.145849839 | 0.88454918  | 1.112185052  | 0.270790505 |
| CUEDC1    | -0.661519566 | 0.510023638 | -0.747352715 | 0.457891012 | -1.395089618 | 0.168474337 |
| CUEDC2    | -1.020787353 | 0.310179268 | 1.009573829  | 0.31692206  | 1.370838859  | 0.175871668 |
| CUL1      | 0.585411838  | 0.559782993 | 1.767960747  | 0.082363754 | 1.499281564  | 0.139393755 |
| CUL2      | 0.708392597  | 0.480591141 | 0.019899969  | 0.984191948 | 0.063804645  | 0.949352035 |
| CUL3      | -1.423526464 | 0.158152321 | 0.282231657  | 0.778777586 | -0.15612467  | 0.876493855 |
| CUL4A     | 2.107206404  | 0.037971741 | 2.628005012  | 0.010990323 | 2.377878013  | 0.020835873 |
| CUL4B     | 0.312236264  | 0.755606482 | 0.554065979  | 0.581678588 | 0.06436991   | 0.948903957 |
| CUL5      | 1.025915071  | 0.307769505 | -0.544837806 | 0.587968572 | -1.578188145 | 0.12013142  |
| CUL7      | 0.994414916  | 0.322772708 | 0.841474994  | 0.403562106 | 1.972377668  | 0.053491133 |
| CUL9      | 1.569978513  | 0.120042305 | 1.148999525  | 0.255305392 | 1.863781034  | 0.067576136 |
| CUTA      | 0.267673466  | 0.789582872 | 1.230367337  | 0.223561008 | 1.809256577  | 0.075757057 |
| CUTC      | 0.149160667  | 0.881771329 | 0.89380878   | 0.375143896 | 1.120623217  | 0.267211106 |
| CUX1      | -1.489405041 | 0.139989256 | 0.523228292  | 0.602822656 | -0.231102244 | 0.818074127 |
| CUX2      | 0.630574295  | 0.529968278 | 0.099013373  | 0.921471457 | 0.125718477  | 0.900403145 |
| CWC15     | 0.2778658    | 0.781773215 | -0.932418003 | 0.355012802 | -0.082586822 | 0.934473336 |
| CWC22     | 0.64328992   | 0.521724349 | 1.143122685  | 0.257716924 | 1.559371553  | 0.124518824 |
| CWC25     | -0.343962882 | 0.73170235  | 1.007775889  | 0.317777177 | 0.393153641  | 0.695692492 |
| CWC27     | 1.227273974  | 0.223023071 | 1.994661603  | 0.050819641 | 3.098180699  | 0.003037419 |
| CWF19L1   | -0.008743192 | 0.993044005 | 2.545848395  | 0.013600282 | 3.635904689  | 0.000601901 |
| CWF19L2   | 1.27789834   | 0.204677122 | 0.676507082  | 0.50142657  | 1.800543105  | 0.077138438 |
| CX3CR1    | 0.760085673  | 0.449253824 | -2.010121293 | 0.049109801 | -1.073326632 | 0.287708705 |
| CXCL1     | -1.380428174 | 0.170983748 | -1.701517421 | 0.094238817 | -1.591073474 | 0.117199325 |
| CXCL10    | -0.529924662 | 0.597511083 | -0.564689756 | 0.57447757  | -1.662485124 | 0.101980087 |
| CXCL16    | -3.238514693 | 0.001700621 | -1.304527012 | 0.197242658 | -2.615827789 | 0.011407987 |
| CXCL5     | -3.728227117 | 0.000342172 | 1.366746864  | 0.177016167 | -1.335221881 | 0.187183522 |
| CXCL6     | -0.049386429 | 0.960724302 | -0.744706136 | 0.459477279 | -0.811434836 | 0.42053717  |
| CXCL9     | -0.002954564 | 0.997649352 | -2.33161966  | 0.023240968 | -2.340633671 | 0.022822675 |
| CXCR1     | -2.563758553 | 0.012067814 | -0.034111606 | 0.972906096 | -0.590919772 | 0.556941788 |
| CXCR2     | -2.563860418 | 0.012064527 | -0.799648787 | 0.427199974 | -1.686247893 | 0.097288978 |
| CXCR2P1   | -5.013473671 | 2.78E-06    | -0.150856634 | 0.880615914 | -1.275206442 | 0.207479211 |
| CXCR3     | -1.274249551 | 0.205960907 | 0.192807708  | 0.847787825 | 0.724205189  | 0.471941932 |
| CXCR4     | 1.614752982  | 0.109977505 | -0.133445387 | 0.894306318 | -0.427601521 | 0.670574222 |
| CXCR5     | -0.536116951 | 0.593242876 | 1.673586868  | 0.099634962 | 1.914553128  | 0.060641932 |
| CXCR6     | 0.486330844  | 0.627952788 | -1.656987244 | 0.102960102 | -0.970814657 | 0.33579769  |
| CXCR7     | -0.341368429 | 0.733647567 | -2.568955966 | 0.012814509 | -2.031041314 | 0.046987875 |
| CXXC1     | 0.543613202  | 0.588094971 | 0.717066311  | 0.476231153 | 1.749543408  | 0.085652428 |
| CXXC5     | 0.250092867  | 0.803103866 | 0.41495845   | 0.679713973 | -0.102691513 | 0.918573121 |
| CXorf21   | -1.466309498 | 0.146161479 | 0.696526551  | 0.488900694 | -1.135167642 | 0.261120163 |
| CXorf23   | 0.949525238  | 0.344978115 | -2.124361867 | 0.037944198 | -2.280328777 | 0.02639942  |
| CXorf26   | 0.888296741  | 0.376825222 | 2.390720319  | 0.020105648 | 3.019061837  | 0.003807357 |

|            |              |             |              |             |              |             |
|------------|--------------|-------------|--------------|-------------|--------------|-------------|
| CXorf38    | -2.472195589 | 0.015370749 | 0.454649672  | 0.651070257 | -0.607296379 | 0.546098631 |
| CXorf40A   | 0.170781831  | 0.864791017 | 1.054163312  | 0.296210322 | 1.849208839  | 0.069685983 |
| CXorf40B   | -0.048661669 | 0.961300221 | 2.279297021  | 0.026372732 | 2.262217756  | 0.027566661 |
| CXorf56    | -0.706049721 | 0.482039591 | 1.061391015  | 0.292942616 | 2.96198623   | 0.004471959 |
| CXorf57    | 2.747858805  | 0.007288798 | 0.234154794  | 0.815695151 | -0.335574602 | 0.738440387 |
| CXorf65    | 0.656763286  | 0.513062937 | -0.137604901 | 0.891032606 | 1.54886122   | 0.127024798 |
| CYB561     | -0.047527368 | 0.962201616 | 0.200424692  | 0.841854477 | 0.190600337  | 0.849525126 |
| CYB561D1   | 0.758546329  | 0.450169649 | 0.839077536  | 0.40489493  | 2.144367537  | 0.036339289 |
| CYB561D2   | -1.075051511 | 0.285317691 | -1.042583738 | 0.301497553 | -0.478301992 | 0.634289505 |
| CYB5A      | 0.28309674   | 0.77777374  | -0.574262455 | 0.5680263   | -0.57533764  | 0.567357964 |
| CYB5B      | -0.054123757 | 0.956960389 | 1.104118682  | 0.274133103 | 1.935226883  | 0.057997001 |
| CYB5D1     | 0.628401342  | 0.531383778 | -0.510623371 | 0.611566407 | 0.641900947  | 0.523545489 |
| CYB5D2     | 1.708881096  | 0.091030505 | -2.547500052 | 0.0135427   | -2.20305606  | 0.03170418  |
| CYB5R1     | -1.979882534 | 0.050870648 | 4.449521252  | 3.99E-05    | 3.47427479   | 0.000993391 |
| CYB5R2     | -0.737591228 | 0.46274335  | 1.822109542  | 0.073631509 | 1.136352698  | 0.26062826  |
| CYB5R3     | -1.930666992 | 0.056774114 | -0.505221514 | 0.615331119 | -0.764052205 | 0.448030084 |
| CYB5R4     | -2.488385474 | 0.014733481 | -0.481638247 | 0.631887957 | -1.075644415 | 0.286679486 |
| CYB5RL     | 4.652107138  | 1.16E-05    | -1.302349279 | 0.197980836 | -0.436162461 | 0.664388717 |
| CYBA       | -1.923760384 | 0.057647269 | -1.634046864 | 0.107703865 | -1.928153052 | 0.05889071  |
| CYBASC3    | 0.10316006   | 0.918072846 | 1.956194374  | 0.055297578 | 1.880729959  | 0.065190305 |
| CYBB       | 0.793042783  | 0.429905676 | 1.247746327  | 0.217173105 | 0.496291936  | 0.621622276 |
| CYBRD1     | -1.926453648 | 0.057305436 | -1.158442444 | 0.25146433  | -1.953026595 | 0.05579924  |
| CYC1       | -0.183085558 | 0.855155962 | -0.452249389 | 0.652788063 | -0.628811522 | 0.532018363 |
| CYCS       | 0.342639255  | 0.732694534 | -0.976668029 | 0.332817922 | -0.558902244 | 0.578447338 |
| CYFIP1     | 0.38789952   | 0.699035815 | 1.758720757  | 0.083936708 | 1.333579366  | 0.187718194 |
| CYFIP2     | -0.800472092 | 0.425613109 | 0.936457148  | 0.352947931 | 1.537754099  | 0.129716695 |
| CYHR1      | -0.526698243 | 0.599740594 | -0.112745356 | 0.910624483 | 0.728331563  | 0.469432666 |
| CYLD       | 0.548047728  | 0.585059567 | 1.547527369  | 0.12721365  | 0.630074349  | 0.531197828 |
| CYP1B1     | -1.5249291   | 0.130896068 | 2.102353808  | 0.03990472  | 0.419956354  | 0.67611752  |
| CYP1B1-AS1 | -2.442989586 | 0.016583041 | 0.199986518  | 0.842195552 | -0.34308403  | 0.732814467 |
| CYP20A1    | -0.203415976 | 0.839283911 | 1.919537464  | 0.05987459  | 2.869110745  | 0.005788101 |
| CYP26B1    | -0.496335153 | 0.620906969 | -0.91488336  | 0.364067255 | -0.474736374 | 0.636813339 |
| CYP27A1    | -2.968902131 | 0.003858723 | 2.118687325  | 0.038441484 | 1.422456749  | 0.160416994 |
| CYP2B7P1   | 0.734238821  | 0.464773229 | -0.812752334 | 0.419706905 | -0.162254138 | 0.871687318 |
| CYP2D6     | 0.910188668  | 0.365232416 | -1.273094817 | 0.208098979 | -1.344375878 | 0.184224844 |
| CYP2D7P1   | 0.168775004  | 0.866364545 | -0.898006843 | 0.372920542 | -0.540570959 | 0.590938015 |
| CYP2E1     | 0.233793899  | 0.815693057 | -1.14709902  | 0.256083488 | 0.114847459  | 0.908975112 |
| CYP2J2     | -0.666531027 | 0.506831672 | 0.535779089  | 0.594174269 | 1.171349928  | 0.246397255 |
| CYP2R1     | 0.825629053  | 0.411267958 | 0.049212326  | 0.960920348 | -0.031005898 | 0.975374616 |
| CYP2S1     | 0.842640446  | 0.401735169 | -0.728778349 | 0.469090269 | -0.306951803 | 0.760013797 |
| CYP2U1     | 1.330510454  | 0.186819592 | -1.113439706 | 0.270144846 | 0.308558478  | 0.758797548 |
| CYP3A5     | -1.194869516 | 0.235378187 | -1.300213648 | 0.198706755 | -1.085068532 | 0.282520989 |
| CYP4F12    | 1.115939871  | 0.267514033 | 0.563848191  | 0.575046418 | 0.869607425  | 0.388211538 |
| CYP4F22    | -0.665217242 | 0.507667431 | -2.488405719 | 0.015746218 | -1.362565679 | 0.178451398 |
| CYP4F3     | -2.515417785 | 0.013722077 | -0.629475458 | 0.531526882 | 0.006931724  | 0.99449386  |
| CYP4V2     | 2.153717304  | 0.034022127 | -0.433422291 | 0.666326989 | -0.578048646 | 0.565538873 |
| CYP51A1    | 4.390752411  | 3.16E-05    | 0.820722747  | 0.415188166 | 1.42134561   | 0.160738203 |
| CYSLTR1    | -0.562910086 | 0.574940774 | -0.500005298 | 0.618976342 | -2.161515236 | 0.034927222 |
| CYSLTR2    | -0.888494791 | 0.376719321 | -0.524846118 | 0.601704556 | -0.450013241 | 0.654430844 |
| CYTH1      | 0.777295435  | 0.439088419 | 1.753161247  | 0.08489509  | 2.490654232  | 0.015729711 |
| CYTH2      | -1.293894333 | 0.199118944 | -0.402855406 | 0.688546044 | 0.497770876  | 0.620586469 |
| CYTH3      | 1.001355726  | 0.319425871 | -1.52295993  | 0.133240708 | -1.511833843 | 0.136175597 |
| CYTH4      | -0.51959792  | 0.604660481 | -0.29353083  | 0.770171531 | -0.430672402 | 0.668352764 |
| CYTIP      | 0.938314932  | 0.350674656 | -0.148808254 | 0.882224733 | 0.016329843  | 0.987029047 |
| CYTL1      | 0.946864108  | 0.34632491  | 1.417825173  | 0.161629453 | 1.05024144   | 0.298099467 |
| CYYR1      | -0.747250235 | 0.456923044 | -1.511812104 | 0.136049364 | -1.124264742 | 0.265676766 |
| D2HGDH     | 1.901147316  | 0.06058593  | -1.701988836 | 0.094149845 | -0.252898645 | 0.801268696 |
| D4S234E    | 2.344899062  | 0.021303439 | -0.264627689 | 0.792240979 | -1.133230251 | 0.261925769 |
| DAAM1      | 1.8923784    | 0.061758987 | -0.432926779 | 0.666684858 | -0.799926567 | 0.42711949  |
| DAAM2      | -6.012719339 | 4.15E-08    | -1.144730625 | 0.257055508 | -0.251904011 | 0.80203359  |
| DAB2       | -0.729119623 | 0.467882595 | 0.293386134  | 0.770281559 | 0.865509872  | 0.390436351 |
| DAB2IP     | -1.08768414  | 0.2797322   | -0.433630835 | 0.666176398 | -0.401367081 | 0.689671004 |
| DACH1      | 0.642836232  | 0.644634869 | 1.113122709  | 0.270279807 | -1.404411812 | 0.165695397 |
| DACT1      | -1.035826379 | 0.303147514 | 2.951507426  | 0.004567928 | 0.957547002  | 0.342389792 |
| DAD1       | -2.086508517 | 0.039853225 | -4.358506634 | 5.47E-05    | -3.371599001 | 0.001357148 |
| DAG1       | -2.076101673 | 0.040829263 | -1.442294855 | 0.154635239 | -0.434860659 | 0.665327805 |
| DAGLA      | 0.554014452  | 0.580987111 | -0.512019318 | 0.610595236 | -0.837824505 | 0.405676027 |
| DAGLB      | 0.563610657  | 0.574465887 | 1.741803089  | 0.086881318 | 3.065563246  | 0.00335266  |
| DAK        | -0.183348668 | 0.854950155 | 3.773989851  | 0.000381785 | 4.182308682  | 0.00010206  |
| DALRD3     | 1.565979858  | 0.120975753 | -0.487514807 | 0.627744063 | -0.819907504 | 0.415730426 |
| DAP        | -3.571490844 | 0.000580572 | 1.257187541  | 0.213759825 | 1.470835621  | 0.14690912  |
| DAP3       | -0.761557243 | 0.448379326 | 1.433397811  | 0.157150501 | 2.173396945  | 0.033977225 |

|         |              |             |              |             |              |             |
|---------|--------------|-------------|--------------|-------------|--------------|-------------|
| DAPK1   | -2.175904137 | 0.032267362 | 0.429949403  | 0.668836815 | -1.201982054 | 0.234407567 |
| DAPK2   | -2.971995138 | 0.003823647 | 0.127834758  | 0.898725036 | 0.374392388  | 0.709520445 |
| DAPK3   | -1.400734375 | 0.164842528 | -1.622943053 | 0.110062966 | -2.018152365 | 0.048355028 |
| DAPP1   | -0.37010708  | 0.712200238 | -0.826561779 | 0.411896588 | -2.601797872 | 0.011831827 |
| DARC    | -1.758186068 | 0.08222509  | 0.813596254  | 0.419227054 | 0.537799134  | 0.592837733 |
| DARS    | 2.134079434  | 0.035643942 | 1.419509227  | 0.161140372 | 1.766486913  | 0.08274118  |
| DARS2   | 0.018444886  | 0.985326089 | 1.399008863  | 0.167172557 | 1.912593068  | 0.060897941 |
| DAXX    | -0.764602649 | 0.446572684 | 0.608130124  | 0.545491853 | 1.19066316   | 0.238787502 |
| DAZAP1  | 1.706905481  | 0.09139882  | -0.471169805 | 0.63929926  | 0.795729273  | 0.429535455 |
| DAZAP2  | -3.775922396 | 0.000290513 | -0.921230898 | 0.36077257  | -1.279313032 | 0.20604018  |
| DBF4    | 0.246133689  | 0.806157265 | 1.071071598  | 0.288604975 | 1.146731204  | 0.256348387 |
| DBF4B   | -0.878297274 | 0.382196394 | -0.64729935  | 0.520009891 | -0.688986495 | 0.493664655 |
| DBH     | 2.126687284  | 0.036271586 | 0.153235061  | 0.878748509 | 1.222060034  | 0.226782552 |
| DBI     | -0.093217928 | 0.925944303 | -2.236318699 | 0.029219394 | -1.62257073  | 0.11027457  |
| DBN1    | -1.063721752 | 0.290391963 | -0.166182846 | 0.868595052 | 0.193763795  | 0.847059022 |
| DBNDD1  | -0.730361592 | 0.467127156 | -0.584338323 | 0.561274586 | 0.443806268  | 0.658885614 |
| DBNDD2  | 0.461022067  | 0.645930744 | -1.089729853 | 0.280370491 | -1.071652115 | 0.288453869 |
| DBNL    | -2.024768595 | 0.045950683 | 1.283390237  | 0.204495121 | 1.701854139  | 0.094305543 |
| DBP     | 0.468639308  | 0.640497067 | -0.170302421 | 0.865369117 | -0.068782592 | 0.945406663 |
| DBR1    | 1.08084166   | 0.282748135 | 0.214738779  | 0.830729495 | -0.462071811 | 0.6458125   |
| DBT     | 1.165077651  | 0.247165242 | -0.006057389 | 0.995187864 | -1.169134973 | 0.866297383 |
| DCAF10  | 0.848440898  | 0.398515811 | -1.564484685 | 0.123182016 | -2.305025773 | 0.024878446 |
| DCAF11  | -2.657911932 | 0.009352292 | 1.041473238  | 0.302007975 | 0.286958611  | 0.775198671 |
| DCAF12  | -3.983465057 | 0.000140446 | 0.037131711  | 0.970508386 | -0.588865259 | 0.558309676 |
| DCAF13  | 1.716987977  | 0.089531827 | -0.20178182  | 0.840798281 | 0.310113646  | 0.757620872 |
| DCAF15  | -1.058923095 | 0.292559657 | -2.747014562 | 0.008013564 | -2.318086332 | 0.024106026 |
| DCAF16  | 1.594187521  | 0.114512875 | -0.756074301 | 0.452685973 | 0.479474674  | 0.633460404 |
| DCAF17  | 0.941774666  | 0.348910146 | -2.663192341 | 0.010019181 | -2.065739683 | 0.043472133 |
| DCAF4   | 1.865968082  | 0.065408116 | 1.524597149  | 0.132832122 | 2.66093742   | 0.010137323 |
| DCAF4L1 | -0.63133182  | 0.529475272 | -0.855550239 | 0.395791742 | -0.702294386 | 0.485392375 |
| DCAF5   | 1.181151773  | 0.240754334 | -1.377817274 | 0.173589635 | -0.284594148 | 0.777000467 |
| DCAF6   | -2.931853966 | 0.004302602 | 0.795918768  | 0.429347471 | 0.996226857  | 0.323407295 |
| DCAF7   | -0.289200983 | 0.773114122 | 1.256076191  | 0.214159537 | 0.964633598  | 0.338858276 |
| DCAF8   | 1.714652629  | 0.089961464 | 1.065080373  | 0.291284234 | 1.533451495  | 0.130771608 |
| DCAKD   | 1.374299356  | 0.172871127 | -0.935507498 | 0.353432704 | 0.931112664  | 0.355775366 |
| DCBLD1  | 0.897909513  | 0.371706644 | -0.100587889 | 0.920226936 | -0.22565945  | 0.822284387 |
| DCBLD2  | 0.910346079  | 0.365149888 | -1.695059653 | 0.095464597 | -0.809872266 | 0.4214273   |
| DCDC2B  | 1.157415753  | 0.250263506 | -0.620792764 | 0.537184941 | 0.006729132  | 0.994654784 |
| DCHS1   | 3.553250038  | 0.000616845 | -0.265978784 | 0.791205358 | 1.340481476  | 0.185479186 |
| DCK     | 1.351604912  | 0.179998027 | -0.225580432 | 0.822326286 | -1.749395282 | 0.085678249 |
| DCLK2   | 1.624591317  | 0.10785947  | 0.808132615  | 0.422339532 | 1.082463592  | 0.283666227 |
| DCLRE1A | 0.168982453  | 0.866201862 | -1.274662081 | 0.207547337 | -2.278158515 | 0.026536941 |
| DCLRE1B | -0.176762245 | 0.860105104 | 0.463007232  | 0.645103889 | 0.487785516  | 0.627598113 |
| DCLRE1C | -0.647584615 | 0.518955201 | 0.878342984  | 0.383407114 | 0.640580722  | 0.524396846 |
| DCP1A   | 1.122028435  | 0.26493087  | -1.03088212  | 0.306905647 | -1.664492878 | 0.101576705 |
| DCP1B   | -0.316771337 | 0.752174333 | -0.54297796  | 0.589240154 | 0.450336018  | 0.654199529 |
| DCP2    | -0.03361124  | 0.973263986 | 0.206203897  | 0.837358813 | -0.692564557 | 0.491432916 |
| DCPS    | -1.278808717 | 0.204357741 | 2.745011919  | 0.008056834 | 2.3624566    | 0.021638958 |
| DCST2   | 0.283467437  | 0.777490537 | -0.306380315 | 0.760419908 | 0.776872221  | 0.440489739 |
| DCTD    | 1.010897739  | 0.314862578 | -0.303237005 | 0.762801863 | 0.193746369  | 0.847072603 |
| DCTN1   | -0.972113778 | 0.33368316  | 1.843209667  | 0.070445817 | 2.176011574  | 0.033771244 |
| DCTN2   | -0.948028513 | 0.345735187 | 2.564874105  | 0.012950243 | 3.721003737  | 0.000460195 |
| DCTN3   | -2.663672304 | 0.009205715 | -1.654204474 | 0.103526297 | -1.445151983 | 0.15396471  |
| DCTN4   | -0.545600814 | 0.586733547 | -0.731329641 | 0.467542834 | -1.30804768  | 0.196178722 |
| DCTN5   | -1.14681837  | 0.254594123 | 0.437371907  | 0.66347729  | 1.447816527  | 0.153220651 |
| DCTN6   | 0.283371159  | 0.777564088 | -1.756285099 | 0.084355469 | -1.067018735 | 0.290522696 |
| DCTPP1  | -0.54028591  | 0.590377331 | -1.101955116 | 0.275064719 | 0.224451181  | 0.823219759 |
| DCUN1D1 | -1.066204299 | 0.28927485  | -0.145456512 | 0.884858297 | -0.970399352 | 0.336002757 |
| DCUN1D2 | 1.129062761  | 0.261968284 | 0.801660799  | 0.426044263 | 1.755654192  | 0.084592813 |
| DCUN1D3 | -1.417697017 | 0.159843213 | -0.735398666 | 0.465080867 | -2.394040768 | 0.020022908 |
| DCUN1D4 | 1.485332643  | 0.141062529 | -0.822204795 | 0.414351199 | -1.192289937 | 0.238154384 |
| DCUN1D5 | 1.611571033  | 0.110669639 | -0.607990391 | 0.545583884 | -0.847744115 | 0.400174191 |
| DCXR    | -0.953689914 | 0.342877206 | -0.498434479 | 0.620075963 | 0.173978916  | 0.862506807 |
| DDA1    | 0.099174713  | 0.921227218 | -1.747554565 | 0.085870783 | -0.255635836 | 0.799164752 |
| DDAH2   | -0.807688306 | 0.421468132 | 1.000016958  | 0.321485181 | 0.502076335  | 0.617574047 |
| DDB1    | -0.607082043 | 0.545374198 | 1.974517225  | 0.053124182 | 1.915190021  | 0.060558943 |
| DDB2    | 0.976440056  | 0.331547892 | 0.277491642  | 0.78239621  | 1.42894245   | 0.158552037 |
| DDHD1   | 1.855829552  | 0.06685621  | -1.49413073  | 0.140600086 | -1.623387521 | 0.110099508 |
| DDHD2   | 3.070151214  | 0.002852386 | -0.334765955 | 0.73901774  | 0.723347722  | 0.472464313 |
| DDI2    | -0.364709273 | 0.716211546 | -0.018631257 | 0.98519966  | -0.241388083 | 0.810132333 |
| DDIT3   | -2.593998332 | 0.011126658 | -1.180155425 | 0.242789601 | -1.015709474 | 0.314117819 |
| DDIT4   | 6.190867122  | 1.90E-08    | -1.077048109 | 0.285949328 | 0.270727697  | 0.787591651 |

|         |              |             |              |             |              |             |
|---------|--------------|-------------|--------------|-------------|--------------|-------------|
| DDO     | -0.191097149 | 0.848893776 | -0.067986636 | 0.946031743 | -0.904294762 | 0.369696788 |
| DDOST   | -0.233856126 | 0.8156449   | 1.268109386  | 0.209860994 | 1.417508249  | 0.161851347 |
| DDR1    | 3.976620242  | 0.000143907 | 0.62368453   | 0.535297083 | 1.223856676  | 0.226109198 |
| DDR GK1 | 0.238045713  | 0.812404177 | 1.057334313  | 0.294773616 | 1.558181972  | 0.124800453 |
| DDT     | 0.259138355  | 0.796139336 | 1.1147511    | 0.269587023 | 0.559279344  | 0.57819173  |
| DDTL    | 0.905538511  | 0.367675755 | -0.389460236 | 0.698372043 | -0.107790424 | 0.91454559  |
| DDX1    | 1.755426828  | 0.082698594 | 1.770358213  | 0.081959657 | 3.058298261  | 0.003405225 |
| DDX10   | -0.902530129 | 0.369261958 | 2.253648893  | 0.0280404   | 2.38220949   | 0.020615157 |
| DDX11   | 1.858995135  | 0.066401211 | 0.7978242    | 0.428249646 | 1.725081227  | 0.090005048 |
| DDX11L2 | -1.704525057 | 0.091844221 | 1.173472881  | 0.245436095 | 1.152494006  | 0.253993686 |
| DDX12   | 2.477903722  | 0.015143301 | 0.185643958  | 0.853376216 | 1.199863395  | 0.235222923 |
| DDX17   | 2.028734761  | 0.045536241 | -1.985182055 | 0.051893188 | -1.754748603 | 0.084749153 |
| DDX18   | 1.622958984  | 0.108208594 | 1.503564572  | 0.138157333 | 1.866162241  | 0.067236552 |
| DDX19A  | -0.852221843 | 0.396425851 | 2.215160899  | 0.030717965 | 2.370547457  | 0.021214232 |
| DDX19B  | 1.099695478  | 0.274491959 | 2.500648277  | 0.015264764 | 2.507630556  | 0.015067599 |
| DDX20   | 0.841879837  | 0.402158495 | 1.000571688  | 0.321219116 | 1.086189701  | 0.28202907  |
| DDX21   | 2.187615227  | 0.031373337 | 0.298639399  | 0.766290013 | -0.352750602 | 0.725594137 |
| DDX23   | -0.411863258 | 0.681450442 | 1.550397372  | 0.126523987 | 1.719410115  | 0.091039813 |
| DDX24   | 0.498719804  | 0.619232686 | 1.929807787  | 0.058560802 | 2.492830371  | 0.015643393 |
| DDX26B  | 2.051614313  | 0.043207502 | -0.69725459  | 0.488448454 | -1.163990022 | 0.249342641 |
| DDX27   | -1.01668544  | 0.312116055 | 2.394948414  | 0.019896575 | 2.735644031  | 0.008314494 |
| DDX28   | 1.196284018  | 0.234828781 | 0.891549478  | 0.376343927 | -0.12134937  | 0.90384688  |
| DDX31   | 2.117190139  | 0.037092006 | 0.733862958  | 0.466009178 | 1.357423916  | 0.180069203 |
| DDX39A  | 0.360495611  | 0.719348426 | 1.421403431  | 0.160591631 | 1.683053618  | 0.09790908  |
| DDX3X   | 0.281456221  | 0.77902741  | -0.809433021 | 0.42159747  | -2.301696617 | 0.025078824 |
| DDX41   | -0.26244688  | 0.793596041 | 1.784660848  | 0.07958307  | 2.247865451  | 0.028523884 |
| DDX42   | 0.695016175  | 0.488893283 | 2.270379469  | 0.026942316 | 1.966479223  | 0.054185841 |
| DDX43   | 0.192730264  | 0.847618442 | -1.673424331 | 0.099667089 | -1.411136028 | 0.163712992 |
| DDX46   | 1.662545981  | 0.099994487 | 2.009718586  | 0.049153704 | 1.674199141  | 0.099644959 |
| DDX47   | 1.357151731  | 0.178235935 | 2.292822278  | 0.025529213 | 3.173698467  | 0.00244071  |
| DDX49   | -0.633693145 | 0.527940016 | 1.411117852  | 0.163588806 | 1.480876987  | 0.144220664 |
| DDX5    | 2.277514695  | 0.025201825 | -0.213150683 | 0.8319621   | 0.204488498  | 0.838710058 |
| DDX50   | 0.572458248  | 0.568484792 | 1.429331895  | 0.15831051  | 2.15763446   | 0.035242513 |
| DDX51   | 1.199511484  | 0.233578664 | 0.939912072  | 0.351187922 | 2.142190464  | 0.036522093 |
| DDX52   | 1.270914811  | 0.207139392 | 0.227660446  | 0.820716453 | 1.977920066  | 0.052845332 |
| DDX54   | 0.314399711  | 0.753968565 | 0.833479244  | 0.408017699 | 1.020087287  | 0.312055481 |
| DDX55   | 2.317933926  | 0.022794325 | 1.090095171  | 0.280210916 | 2.653668602  | 0.010332917 |
| DDX56   | 0.096441629  | 0.923391165 | 1.814351929  | 0.074832756 | 3.322329672  | 0.00157352  |
| DDX58   | -1.935311086 | 0.05619331  | 1.559092295  | 0.124452816 | -1.975071291 | 0.003176431 |
| DDX59   | 0.348445569  | 0.728345547 | -2.498723821 | 0.015339554 | -2.165452712 | 0.05200006  |
| DDX6    | -0.09204133  | 0.926876351 | -1.995829356 | 0.050688724 | -1.513487983 | 0.135755935 |
| DDX60   | -0.423699404 | 0.672828492 | 2.117656413  | 0.038532435 | -0.942038897 | 0.350202056 |
| DDX60L  | -0.425525147 | 0.671502394 | 0.664087227  | 0.509284307 | -1.633684355 | 0.107911874 |
| DEAF1   | -1.212125157 | 0.228738963 | -0.341001878 | 0.734342983 | -0.372186978 | 0.711152522 |
| DECR1   | -2.050939792 | 0.043274664 | 0.919278373  | 0.361783976 | 1.090424051  | 0.280176607 |
| DECR2   | -0.850007298 | 0.397649148 | 0.384227611  | 0.702224673 | 0.442676483  | 0.65969781  |
| DEDD    | -2.014725748 | 0.047014581 | -0.872388336 | 0.386618895 | -0.674327676 | 0.502865662 |
| DEDD2   | -1.288495557 | 0.200982192 | -1.921113917 | 0.059671314 | -2.462461187 | 0.016887537 |
| DEF6    | 0.072093337  | 0.94269275  | 0.666179047  | 0.507956245 | 1.733459074  | 0.088494209 |
| DEF8    | -1.557916998 | 0.122875514 | 0.72276587   | 0.472748491 | 1.573797026  | 0.121144004 |
| DEFA4   | -2.839574256 | 0.005620643 | 1.228392722  | 0.224295444 | -0.33339517  | 0.740075888 |
| DEGS1   | -2.574560834 | 0.011723672 | -1.866937085 | 0.067002854 | -2.574877049 | 0.012685473 |
| DEGS2   | 1.184318661  | 0.239505447 | 0.975141757  | 0.33356783  | 0.329266499  | 0.743177453 |
| DEK     | 0.438451371  | 0.662143589 | -0.014475323 | 0.988500792 | -0.719134926 | 0.475035549 |
| DEM1    | 2.12680319   | 0.036261671 | -0.970135598 | 0.336035368 | -0.109467404 | 0.913221463 |
| DENND1A | -1.732303857 | 0.086755633 | 1.020133967  | 0.311930846 | 0.951333633  | 0.345505959 |
| DENND1B | 0.474299099  | 0.636472352 | -0.580190732 | 0.564049007 | -1.463192846 | 0.148981636 |
| DENND1C | -0.998931004 | 0.32059243  | 0.216700482  | 0.829207504 | 1.398274153  | 0.167521017 |
| DENND2C | -0.944700345 | 0.347422496 | 0.871919459  | 0.386872509 | 0.096333604  | 0.923598105 |
| DENND2D | 1.80098163   | 0.075163164 | 0.808174272  | 0.422315748 | 2.74155476   | 0.008183968 |
| DENND3  | -0.354538838 | 0.723791178 | -0.850395528 | 0.398626623 | -1.201008584 | 0.234781946 |
| DENND4A | 0.887647839  | 0.377172333 | -0.385969185 | 0.700941525 | -1.637406838 | 0.107129755 |
| DENND4B | 0.531882383  | 0.596160135 | 0.241210319  | 0.810248752 | 0.789535178  | 0.433115636 |
| DENND4C | 0.825937225  | 0.411094059 | -0.599126817 | 0.551437713 | -1.772878395 | 0.081664594 |
| DENND5A | -1.619456454 | 0.108960788 | 0.295486145  | 0.768685168 | -0.37426123  | 0.709617469 |
| DENND5B | 0.590652549  | 0.556281219 | 1.865756052  | 0.067170803 | 1.04130466   | 0.302190254 |
| DENR    | 0.32594789   | 0.745244799 | 0.972585374  | 0.33482637  | 0.842353274  | 0.403158445 |
| DEPDC1  | -0.391946664 | 0.696054014 | 1.955667188  | 0.05536122  | 1.460475995  | 0.149723871 |
| DEPDC1B | -0.59610706  | 0.552648166 | 0.785149329  | 0.435583815 | -0.215951379 | 0.829807026 |
| DEPDC5  | 0.494634098  | 0.622102516 | 1.079134527  | 0.285026236 | 0.634609618  | 0.528256433 |
| DEPDC7  | 1.500991281  | 0.136970667 | -0.528768584 | 0.598997831 | 0.53772048   | 0.592891681 |
| DEPTOR  | 3.071055718  | 0.00284461  | 0.359937468  | 0.720210384 | 2.065175114  | 0.043527459 |

|         |              |             |              |             |              |             |
|---------|--------------|-------------|--------------|-------------|--------------|-------------|
| DERA    | -0.270885788 | 0.787119136 | -0.339576961 | 0.735410289 | -0.736019362 | 0.464777944 |
| DERL1   | -0.905229868 | 0.367838291 | -1.178771557 | 0.243335959 | -1.353216919 | 0.181401196 |
| DERL2   | -1.405547848 | 0.163411856 | -2.875865536 | 0.005639271 | -2.124634269 | 0.038025871 |
| DERL3   | 2.47315744   | 0.01533221  | -0.538364019 | 0.592400324 | 0.681645795  | 0.498260645 |
| DES     | 0.070817431  | 0.943705242 | -0.886670534 | 0.378943665 | 0.314943473  | 0.753970202 |
| DET1    | 1.404423365  | 0.163745222 | -1.503197849 | 0.138251659 | -0.459118155 | 0.647919046 |
| DEXI    | 1.19905699   | 0.233754415 | 0.411787271  | 0.682023812 | 0.719780282  | 0.474641152 |
| DFFA    | 0.981898326  | 0.32886677  | 2.523043467  | 0.014418334 | 2.180909401  | 0.033388341 |
| DFFB    | 1.80240125   | 0.074937816 | 0.120318332  | 0.904649716 | 0.480795756  | 0.632526946 |
| DFNA5   | 0.719302283  | 0.473878255 | 2.345640032  | 0.022460125 | 2.052022675  | 0.04483375  |
| DFNB31  | 0.613125421  | 0.541389521 | -1.08360823  | 0.283053918 | -0.458368327 | 0.648454285 |
| DFNB59  | 2.125708336  | 0.03635542  | -0.307512949 | 0.759562184 | 0.503882625  | 0.616312191 |
| DGAT1   | -1.752319157 | 0.083234581 | -1.042868245 | 0.301366879 | -0.999320422 | 0.321920099 |
| DGAT2   | -2.374403408 | 0.019771731 | -0.518905774 | 0.605814584 | -0.469756958 | 0.640345142 |
| DGCR10  | -0.189979968 | 0.849766438 | -0.822485168 | 0.414192977 | -1.101802461 | 0.275240841 |
| DGCR11  | -0.683691111 | 0.495983246 | 0.351465293  | 0.726521822 | 0.388805883  | 0.69888797  |
| DGCR14  | -1.682146839 | 0.096118716 | 0.754395204  | 0.453685384 | 0.991458097  | 0.325708814 |
| DGCR2   | -2.057250937 | 0.042649763 | 0.809769629  | 0.421405517 | 0.595287481  | 0.554039367 |
| DGCR6   | -1.474757898 | 0.143879534 | 1.975291712  | 0.053033951 | 2.158755333  | 0.035151193 |
| DGCR6L  | 0.635037495  | 0.527066996 | 0.331780914  | 0.741258996 | 0.506588235  | 0.614424256 |
| DGCR8   | 0.34215365   | 0.733058655 | 2.004542299  | 0.049721037 | 2.839916283  | 0.006270777 |
| DGCR9   | -0.389741468 | 0.69767814  | -0.04442888  | 0.964716218 | -1.72566812  | 0.089898519 |
| DGKA    | 1.226961698  | 0.223139838 | 2.18325325   | 0.033106006 | 4.133223617  | 0.000120257 |
| DGKD    | 2.16577327   | 0.033058586 | 1.534159154  | 0.130465672 | 2.201430555  | 0.0318252   |
| DGKE    | 2.756994461  | 0.007104357 | -0.977792311 | 0.332266239 | -1.372478847 | 0.175363697 |
| DGKG    | -0.999726089 | 0.320209594 | 1.524544462  | 0.132845255 | 1.127503481  | 0.26431738  |
| DGKH    | -0.087330476 | 0.930609089 | -0.636434178 | 0.527014729 | -1.235194025 | 0.2218939   |
| DGKK    | -0.715934964 | 0.475944603 | -0.959805392 | 0.34116514  | -0.417147761 | 0.678158511 |
| DGKQ    | 0.806895532  | 0.421922318 | -0.582768324 | 0.562323998 | -0.766809571 | 0.446401957 |
| DGKZ    | -0.325791404 | 0.745362793 | -0.305511391 | 0.761078134 | 0.658567942  | 0.512860599 |
| DGUOK   | -2.517383161 | 0.013651034 | -0.470154163 | 0.640020287 | 0.820064158  | 0.415641867 |
| DHCR24  | 3.643759818  | 0.000455775 | -0.158752777 | 0.874418994 | 0.856566449  | 0.395319847 |
| DHCR7   | 0.614052497  | 0.540779567 | 0.26459635   | 0.792265005 | -0.165696281 | 0.868990217 |
| DHDDS   | -0.801867596 | 0.424809652 | 0.386480459  | 0.700564996 | 0.843601417  | 0.402466284 |
| DHFR    | 2.24279351   | 0.02744589  | 0.215740239  | 0.829952429 | 1.579339019  | 0.119867159 |
| DHFRL1  | 0.970442405  | 0.33451049  | -1.69932916  | 0.094652723 | -0.661978988 | 0.510688311 |
| DHODH   | 1.872795357  | 0.064447867 | 0.4511397    | 0.653582872 | 2.059916043  | 0.044045773 |
| DHPS    | -0.283728106 | 0.777291412 | -1.408366128 | 0.164397939 | -0.509299312 | 0.612535134 |
| DHRS1   | 0.155443525  | 0.876830984 | 0.371010241  | 0.711991071 | 1.456564525  | 0.150797555 |
| DHRS11  | -1.175707921 | 0.242912052 | 1.219081736  | 0.227782415 | 1.252762543  | 0.215476455 |
| DHRS12  | -0.822944177 | 0.412784886 | -1.351985979 | 0.181665114 | -0.953678326 | 0.34432786  |
| DHRS13  | 0.065362483  | 0.948035031 | 1.146358885  | 0.256386967 | 0.390742135  | 0.697464199 |
| DHRS3   | 0.733556334  | 0.46518709  | 0.447984675  | 0.655844844 | 1.387204292  | 0.170852873 |
| DHRS4   | 0.108252784  | 0.914043909 | 0.264925723  | 0.792012502 | 1.214866476  | 0.229493301 |
| DHRS4L2 | 0.038792529  | 0.969144488 | 2.292854046  | 0.025527261 | 2.627468422  | 0.011066881 |
| DHRS7   | -2.007215513 | 0.047823898 | 0.490535444  | 0.625618708 | 0.473334524  | 0.637806792 |
| DHRS7B  | 0.129211557  | 0.897487861 | 1.853847729  | 0.068884183 | 1.183085438  | 0.241752714 |
| DHRS9   | -3.364556756 | 0.001141253 | -0.532844838 | 0.596190956 | -0.837934683 | 0.405614663 |
| DHRSX   | -2.971431438 | 0.003830018 | 0.232350076  | 0.817089754 | -0.664319225 | 0.509200817 |
| DHTKD1  | -0.82454967  | 0.411877393 | 0.705451687  | 0.483372618 | 0.50121396   | 0.618176903 |
| DHX15   | 1.451909175  | 0.150115877 | 0.694502717  | 0.490159068 | 0.378151066  | 0.706742055 |
| DHX16   | 0.890443015  | 0.375678563 | -0.108152396 | 0.914250691 | 0.339569783  | 0.73544546  |
| DHX29   | 0.614936623  | 0.540198198 | 1.553955314  | 0.125673164 | 1.719915594  | 0.090947185 |
| DHX30   | 1.06813398   | 0.288408556 | 0.636030716  | 0.527275792 | 1.155483468  | 0.252778288 |
| DHX32   | 3.095647289  | 0.002640605 | 2.493224528  | 0.0155551   | 2.912513043  | 0.005133786 |
| DHX33   | 2.181848541  | 0.031810828 | 0.137552953  | 0.89107348  | -0.871183368 | 0.387357977 |
| DHX34   | -1.137162416 | 0.25858596  | -1.396361358 | 0.167964114 | -1.182156557 | 0.242118014 |
| DHX35   | 0.652220056  | 0.515975034 | 4.032748636  | 0.000164087 | 3.84667075   | 0.00030786  |
| DHX36   | 1.267887269  | 0.208213619 | 1.256943013  | 0.213847725 | 1.224009567  | 0.226051964 |
| DHX37   | 1.169282653  | 0.245476513 | 0.884033181  | 0.380353686 | 0.90421856   | 0.369736835 |
| DHX38   | -0.638846885 | 0.524597259 | 1.887211081  | 0.064174654 | 1.391605643  | 0.169522081 |
| DHX40   | -0.105122057 | 0.916520419 | -0.59317594  | 0.555385591 | -1.511558722 | 0.136245496 |
| DHX57   | 0.793407665  | 0.429694256 | 2.260679691  | 0.027574211 | 2.604609365  | 0.011745761 |
| DHX58   | -1.479816213 | 0.142526622 | 0.511092561  | 0.61123991  | -1.536536095 | 0.130014635 |
| DHX8    | -0.841878583 | 0.402159193 | 1.83237949   | 0.072066161 | 1.809950012  | 0.07564802  |
| DHX9    | 0.217022955  | 0.828697482 | 1.785863009  | 0.079385959 | 1.772472301  | 0.081732648 |
| DIABLO  | -0.719965132 | 0.473472091 | 0.567711007  | 0.572437638 | 1.119811269  | 0.267554068 |
| DIAPH1  | -1.621393909 | 0.108544187 | 1.495934121  | 0.140130508 | 1.770473724  | 0.082068261 |
| DIAPH2  | -0.174777687 | 0.861659544 | 2.007379149  | 0.049409418 | 2.203524184  | 0.031669404 |
| DICER1  | 0.118761718  | 0.905737336 | -0.819086493 | 0.416113409 | -1.836681398 | 0.071543912 |
| DIDO1   | 4.643901185  | 1.20E-05    | -0.771709137 | 0.443441476 | 0.621701711  | 0.53665031  |
| DIEXF   | 1.759711435  | 0.081964288 | 0.446042985  | 0.657238537 | 1.231353683  | 0.223315242 |

|               |              |             |              |             |              |             |
|---------------|--------------|-------------|--------------|-------------|--------------|-------------|
| DIMT1L        | 1.70053633   | 0.092594528 | -0.876463456 | 0.384419066 | -0.735755154 | 0.464937475 |
| DIP2A         | 3.35487513   | 0.00117717  | -1.223312736 | 0.226193018 | -1.248623271 | 0.216975952 |
| DIP2B         | -1.129468959 | 0.261797923 | -0.03426173  | 0.972786904 | -2.316067602 | 0.024224004 |
| DIP2C         | 1.745845244  | 0.084360345 | 0.414222942  | 0.680249432 | 0.640079704  | 0.524720121 |
| DIRAS1        | -0.770243271 | 0.443237625 | 0.966818363  | 0.33767706  | 1.614518509  | 0.112012509 |
| DIRC2         | -2.692329524 | 0.008507045 | -1.440568436 | 0.155120842 | -2.394195597 | 0.020015526 |
| DIRC3         | -0.411680009 | 0.681584265 | -0.102622475 | 0.918619068 | 0.28995632   | 0.772916108 |
| DIS3          | 1.318625546  | 0.190747563 | 0.128123717  | 0.898497383 | -0.526451038 | 0.600645156 |
| DIS3L         | 2.164984029  | 0.033120929 | 0.170949115  | 0.864862915 | 0.346646196  | 0.730150883 |
| DIS3L2        | 0.567784077  | 0.571640822 | 0.930108247  | 0.356197093 | 2.022051741  | 0.047937839 |
| DISC1         | 0.443555565  | 0.658462697 | -0.988243528 | 0.327166885 | -1.822471821 | 0.073701589 |
| DISP1         | -0.540936009 | 0.58993107  | -0.986516595 | 0.328005874 | -0.169398664 | 0.866090952 |
| DISP2         | 2.156463539  | 0.033800519 | -1.827411564 | 0.072819847 | -1.290093709 | 0.202297861 |
| DIXDC1        | 0.022382372  | 0.982194087 | -0.475391679 | 0.636305812 | 0.116099069  | 0.907987624 |
| DKC1          | 1.239033101  | 0.21865837  | 2.583252261  | 0.012349238 | 2.74735018   | 0.00805782  |
| DKFZP434I0714 | 1.385612798  | 0.169399427 | -1.988518725 | 0.051513114 | -2.207916328 | 0.031344744 |
| DKFZP586I142C | 0.170297632  | 0.865170622 | -0.323284716 | 0.74765047  | -0.95043319  | 0.34595909  |
| DKFZP686I152I | -1.185565424 | 0.239015053 | -1.68970183  | 0.096491508 | 0.028274094  | 0.977543641 |
| DKFZp761E198  | -1.166490574 | 0.246596891 | -0.080522336 | 0.936100975 | -0.859581158 | 0.393669465 |
| DKK3          | 1.871236072  | 0.06466613  | 0.144412147  | 0.885679154 | -0.667337158 | 0.507286014 |
| DLAT          | 2.306892536  | 0.023430937 | 0.848470657  | 0.399688433 | 0.823217832  | 0.413861485 |
| DLC1          | -2.090623526 | 0.039472879 | 1.742913491  | 0.086685456 | 1.592437887  | 0.116892255 |
| DLD           | 0.651633353  | 0.516351731 | 1.287828625  | 0.202955935 | 0.699383079  | 0.487195455 |
| DLEC1         | 2.290799989  | 0.024386891 | -1.667262232 | 0.100891363 | -0.921824525 | 0.360558029 |
| DLEU1         | -0.126758988 | 0.899423028 | -0.769705079 | 0.44620207  | -1.901677561 | 0.06234052  |
| DLEU2         | -0.295761795 | 0.768115251 | -1.695958085 | 0.09529328  | -1.941209231 | 0.057250248 |
| DLEU7         | -2.358293029 | 0.02059552  | -0.519952195 | 0.605089655 | -2.324206972 | 0.023751445 |
| DLG1          | 1.462776759  | 0.147123999 | -1.148012587 | 0.255709249 | -2.119561551 | 0.038470324 |
| DLG3          | 1.583850105  | 0.116848521 | 0.434570445  | 0.665498069 | 1.756817939  | 0.084392258 |
| DLG4          | -1.318865117 | 0.190667779 | 0.273025224  | 0.785810393 | -0.163317954 | 0.870853597 |
| DLG5          | 1.995732452  | 0.049084351 | -1.207193143 | 0.232292104 | -0.927396538 | 0.357683928 |
| DLGAP3        | 0.055199984  | 0.956105436 | -1.87245918  | 0.066222282 | -2.145963459 | 0.036205793 |
| DLGAP4        | -2.045627203 | 0.043806777 | -0.194101838 | 0.846779111 | -0.404217868 | 0.687585702 |
| DLGAP5        | 1.180458141  | 0.241028495 | 1.504303658  | 0.137967384 | 2.0605402    | 0.04398398  |
| DLK2          | 1.773972733  | 0.079558814 | 0.297246501  | 0.767347753 | 0.246001261  | 0.80657691  |
| DLL1          | 0.11664105   | 0.90741276  | -0.25893678  | 0.7966072   | -1.167925017 | 0.247764753 |
| DLST          | -0.460864384 | 0.646043429 | 1.341909106  | 0.184891842 | 2.056630625  | 0.044372278 |
| DLX4          | -0.321940031 | 0.748268732 | 0.524653571  | 0.601837616 | -0.349889962 | 0.727728284 |
| DMAP1         | -0.300419437 | 0.764572392 | 2.212718327  | 0.030895256 | 3.373760405  | 0.001348333 |
| DMC1          | -1.373946894 | 0.172980148 | -0.168312373 | 0.86692719  | -1.158263289 | 0.251651861 |
| DMD           | 1.903831373  | 0.060230648 | 1.03245718   | 0.30617389  | 1.260098073  | 0.212837933 |
| DMKN          | 0.02528481   | 0.979885571 | -1.015561049 | 0.314085658 | -0.619561088 | 0.538048967 |
| DMPK          | 1.26927264   | 0.207721556 | -0.234540993 | 0.815396791 | 1.018291537  | 0.312900328 |
| DMRTC2        | 0.435023529  | 0.664620256 | -0.235033075 | 0.815016671 | -1.730135136 | 0.089091109 |
| DMTF1         | 0.621008422  | 0.536214215 | -1.611222965 | 0.112598272 | -2.268476144 | 0.027518244 |
| DMWD          | 0.814858508  | 0.417373536 | -2.126234546 | 0.037781324 | -1.205797567 | 0.232944373 |
| DMXL1         | 1.21075091   | 0.229262691 | -0.921443491 | 0.360662557 | -2.664752584 | 0.010036021 |
| DMXL2         | -0.970728351 | 0.334368851 | -1.484446685 | 0.143142946 | -2.356475979 | 0.021957776 |
| DNA2          | 1.133381405  | 0.260161017 | -0.985183046 | 0.328654727 | -1.814136262 | 0.074992556 |
| DNAAF2        | 1.415693444  | 0.16042757  | -1.891987257 | 0.063523301 | -1.99053023  | 0.051400881 |
| DNAH1         | 1.161614095  | 0.24856241  | -1.174396971 | 0.245068895 | -0.119980775 | 0.904925993 |
| DNAH10        | -0.795073522 | 0.428729805 | 0.923027571  | 0.359843504 | 0.934113698  | 0.35423889  |
| DNAH14        | -0.349197021 | 0.727783348 | 1.048377687  | 0.298844028 | 0.715477442  | 0.477274239 |
| DNAH17        | 0.719017475  | 0.474052833 | 1.200047406  | 0.235033791 | 0.626765923  | 0.53334891  |
| DNAH6         | 1.462792906  | 0.147119589 | -0.613648526 | 0.541863656 | 0.344569699  | 0.731703165 |
| DNAH8         | 2.015636421  | 0.046917247 | -0.32693827  | 0.744899782 | -1.089397556 | 0.280624901 |
| DNAI2         | 1.387722834  | 0.168757857 | 1.755734795  | 0.084450323 | 1.39446486   | 0.168661854 |
| DNAJA1        | -0.076771005 | 0.938981612 | 0.814082343  | 0.418950815 | -0.500111061 | 0.618948285 |
| DNAJA2        | -0.003902215 | 0.996895405 | 1.573536872  | 0.121072129 | 1.085636102  | 0.28227189  |
| DNAJA3        | 2.012054667  | 0.047301069 | 0.435081016  | 0.665129592 | 1.670401618  | 0.100397131 |
| DNAJA4        | -0.697790725 | 0.487164808 | 0.973643875  | 0.334304876 | 0.934885398  | 0.35384449  |
| DNAJB1        | 1.293013897  | 0.199421924 | 1.270524382  | 0.209006075 | 2.23757718   | 0.029228031 |
| DNAJB11       | 1.402131472  | 0.164426295 | 0.229474712  | 0.81931293  | 0.353348089  | 0.725148665 |
| DNAJB12       | -1.481036586 | 0.14220171  | -0.190475093 | 0.849606634 | 0.030223718  | 0.975995641 |
| DNAJB13       | 1.382170726  | 0.170450003 | 0.556385571  | 0.580102629 | 1.473018266  | 0.14632142  |
| DNAJB14       | 0.161551254  | 0.872033019 | -0.631747171 | 0.530051658 | -2.130433052 | 0.037523301 |
| DNAJB2        | -1.91731326  | 0.058472555 | 0.159802002  | 0.873596145 | 0.159593526  | 0.8737731   |
| DNAJB4        | 1.606719293  | 0.111731716 | -0.715458439 | 0.477216231 | -1.049464986 | 0.298453373 |
| DNAJB5        | -3.282273651 | 0.00148236  | -3.059703736 | 0.003360757 | -2.758086567 | 0.007828833 |
| DNAJB6        | -3.439038951 | 0.000897472 | -1.182310415 | 0.241940564 | -2.040939685 | 0.045960727 |
| DNAJB7        | -0.367329543 | 0.714263324 | -1.320073225 | 0.192032979 | -1.587153612 | 0.118085133 |
| DNAJB9        | 1.254195654  | 0.21312298  | 0.149331387  | 0.881813811 | 0.160502196  | 0.873060648 |



|          |              |             |              |             |              |             |
|----------|--------------|-------------|--------------|-------------|--------------|-------------|
| DNAJC1   | -0.270120874 | 0.787705602 | 1.516775658  | 0.134793073 | 1.782849949  | 0.080008299 |
| DNAJC10  | 1.080918915  | 0.282713959 | 0.743979183  | 0.459913542 | 0.510605487  | 0.611625913 |
| DNAJC11  | 2.159144032  | 0.033585428 | 0.679998031  | 0.499229852 | 1.326579145  | 0.190009892 |
| DNAJC13  | 0.243297583  | 0.808346379 | 1.911043536  | 0.060980013 | 0.683652727  | 0.497001793 |
| DNAJC14  | -2.522833349 | 0.013455575 | 0.334016128  | 0.739580519 | 0.675698911  | 0.502001041 |
| DNAJC15  | 0.259951004  | 0.79551444  | -1.217472707 | 0.228388994 | -0.488495719 | 0.627098262 |
| DNAJC16  | 1.691160196  | 0.09437797  | -0.06749371  | 0.946422424 | 1.092080966  | 0.279454047 |
| DNAJC17  | 1.413733705  | 0.161000731 | 0.595242     | 0.554013339 | 2.084532409  | 0.041664994 |
| DNAJC18  | 2.533977384  | 0.013064251 | -0.120844624 | 0.904234695 | 0.25121432   | 0.802564091 |
| DNAJC19  | 1.993492847  | 0.049333461 | -1.635687555 | 0.107358795 | -0.818758543 | 0.416380299 |
| DNAJC2   | 1.38190869   | 0.170530184 | 1.268518519  | 0.209715976 | 2.379231538  | 0.020766676 |
| DNAJC21  | 0.945900067  | 0.34681365  | 0.938777419  | 0.351765307 | 0.162567072  | 0.871442054 |
| DNAJC24  | 1.896573649  | 0.061195405 | -0.884742464 | 0.379974153 | -1.395187777 | 0.16844489  |
| DNAJC25  | 0.775666461  | 0.44004482  | -0.959745828 | 0.341194866 | -1.458308037 | 0.150318226 |
| DNAJC27  | 0.426304223  | 0.670936841 | -0.522262324 | 0.603490051 | -1.542461405 | 0.12857034  |
| DNAJC3   | -1.902280067 | 0.060435776 | 0.819353319  | 0.415962442 | 0.654390081  | 0.515527947 |
| DNAJC30  | -1.990651657 | 0.049651038 | -3.933213877 | 0.000227788 | -2.525315143 | 0.014404762 |
| DNAJC4   | -0.455279841 | 0.650039662 | -3.254195371 | 0.001905504 | -3.128612898 | 0.002782155 |
| DNAJC5   | -1.153561922 | 0.251832279 | 1.820224001  | 0.073921982 | 1.714250228  | 0.091989814 |
| DNAJC6   | -0.769669211 | 0.443576379 | -0.431364528 | 0.667813656 | 0.275393764  | 0.784023098 |
| DNAJC7   | 0.453806187  | 0.651095908 | 3.152431492  | 0.002570532 | 3.456427452  | 0.00104913  |
| DNAJC8   | -1.148585253 | 0.253868426 | 1.888693107  | 0.063971939 | 2.919267633  | 0.005038355 |
| DNAJC9   | 0.873976537  | 0.384531965 | 1.597977376  | 0.115520224 | 2.234215223  | 0.029461436 |
| DNAL1    | 1.744693485  | 0.084561935 | -0.429277099 | 0.669323124 | 1.059574647  | 0.293867938 |
| DNAL4    | -1.833023048 | 0.070212011 | -1.215626885 | 0.229086292 | -0.571208286 | 0.570134288 |
| DNASE1   | 0.819283467  | 0.414858575 | -1.968599372 | 0.053817993 | -1.705393301 | 0.093639544 |
| DNASE1L1 | -0.190922241 | 0.849030389 | -0.987258652 | 0.327645188 | -0.978497802 | 0.33201889  |
| DNASE1L2 | -1.356400479 | 0.178473823 | -0.084354315 | 0.933067247 | -0.820372882 | 0.415467374 |
| DNASE1L3 | 0.246253868  | 0.806064535 | -0.62072782  | 0.537227378 | 0.34180339   | 0.733772865 |
| DNASE2   | -0.136056387 | 0.892090353 | 0.044332178  | 0.964792964 | 0.180363865  | 0.857515311 |
| DND1     | 1.451171548  | 0.150320646 | -0.497739344 | 0.620562856 | 0.518262188  | 0.606308511 |
| DNHD1    | 3.358074749  | 0.001165184 | 0.762090375  | 0.449115658 | 0.987542022  | 0.327606966 |
| DNLZ     | -0.389919183 | 0.697547201 | 2.099786709  | 0.040139049 | 0.632666835  | 0.529515401 |
| DNM1     | -0.839462548 | 0.403505673 | -1.178000459 | 0.243640776 | 0.006248261  | 0.995036754 |
| DNM1L    | 0.534629024  | 0.594267174 | -0.800848159 | 0.426510823 | -0.802717024 | 0.425517811 |
| DNM1P35  | 1.906419379  | 0.059889745 | -1.158105023 | 0.251600865 | -0.782353285 | 0.437288878 |
| DNM1P46  | 1.19683858   | 0.234613636 | -2.25458997  | 0.027977599 | -1.700352515 | 0.094589294 |
| DNM2     | -0.637778901 | 0.525289055 | -1.526432471 | 0.132375282 | -1.456109707 | 0.150922791 |
| DNM3     | -3.280232309 | 0.001491929 | 1.658897758  | 0.102572846 | -0.201067045 | 0.841371614 |
| DNMBP    | -1.437564127 | 0.154137119 | 0.420128503  | 0.675954798 | 0.070448359  | 0.944086727 |
| DNMT1    | 1.659145238  | 0.100679667 | 1.253282361  | 0.215166817 | 1.354189708  | 0.181092532 |
| DNMT3A   | 0.750194206  | 0.455157427 | 0.804211303  | 0.424581933 | 1.065566185  | 0.291173372 |
| DNMT3B   | 1.030561823  | 0.305596685 | -1.312000603 | 0.194725084 | -0.314916658 | 0.753990454 |
| DNPEP    | -0.043864515 | 0.965112704 | -0.248166695 | 0.804888104 | 0.316038258  | 0.753143479 |
| DNTTIP1  | -2.967323567 | 0.003876738 | -0.011616817 | 0.990771474 | -0.351078168 | 0.726841573 |
| DNTTIP2  | 1.143778059  | 0.255846277 | 0.038229307  | 0.969637053 | 0.955960375  | 0.343183767 |
| DOC2GP   | 1.441037678  | 0.153155844 | 1.120042926  | 0.267344299 | 0.758228436  | 0.451480175 |
| DOCK1    | -0.805456564 | 0.42274746  | 1.760178589  | 0.083686891 | -0.762687991 | 0.448836883 |
| DOCK10   | 3.406064421  | 0.000998629 | 1.508063101  | 0.137004384 | 1.17990581   | 0.243004817 |
| DOCK11   | 0.282582605  | 0.778166574 | 0.357196483  | 0.722250195 | -0.894992392 | 0.374605898 |
| DOCK2    | -1.29476047  | 0.198821218 | 1.456514993  | 0.150680401 | 1.30206588   | 0.198201805 |
| DOCK3    | 1.320550545  | 0.190107185 | 0.14528375   | 0.884994077 | -0.591241563 | 0.556727693 |
| DOCK4    | -1.853042097 | 0.067259019 | -0.289679979 | 0.773101345 | -2.333111454 | 0.023243886 |
| DOCK5    | -1.161190216 | 0.248733784 | -0.896421241 | 0.373759314 | -1.366516812 | 0.177215777 |
| DOCK6    | -1.427643479 | 0.156966465 | 0.783659485  | 0.436450754 | -0.993275131 | 0.324830583 |
| DOCK7    | 1.569338758  | 0.120191263 | 1.289130073  | 0.202506253 | 1.392636494  | 0.169211549 |
| DOCK8    | -0.255152806 | 0.799205991 | 0.709577704  | 0.48082885  | -0.133094095 | 0.894594077 |
| DOCK9    | 2.799121069  | 0.006307774 | 0.943436374  | 0.34939846  | 1.020829265  | 0.311706853 |
| DOKH     | -0.020870641 | 0.983396535 | -2.970076195 | 0.004335549 | -1.566371903 | 0.122871812 |
| DOK1     | -0.957060708 | 0.341182881 | 0.544112612  | 0.588464235 | 0.090149992  | 0.928488341 |
| DOK2     | -0.758262968 | 0.450338351 | -0.456976561 | 0.64940679  | -0.227106979 | 0.821164136 |
| DOK3     | -1.163805244 | 0.247677868 | -0.889442923 | 0.377465013 | -1.285870974 | 0.203757603 |
| DOK4     | -0.408123448 | 0.684183568 | 0.497997169  | 0.620382248 | 0.409151023  | 0.683982949 |
| DOK6     | 1.678544904  | 0.096821627 | -2.167469674 | 0.034346461 | -1.90794012  | 0.061509936 |
| DOK7     | -1.055088756 | 0.294299666 | -1.360189515 | 0.179070058 | -1.539457014 | 0.129301053 |
| DOLK     | -0.591585127 | 0.555659223 | -1.484681441 | 0.143080878 | -2.155437482 | 0.035422109 |
| DOLPP1   | 1.161591906  | 0.248571379 | 0.652182996  | 0.516877501 | 1.959831371  | 0.054978066 |
| DOM3Z    | 1.735551755  | 0.08617609  | -0.092718455 | 0.926448992 | 1.136368075  | 0.260621882 |
| DONSON   | 0.155724489  | 0.876610169 | -1.019250715 | 0.312346264 | 0.546257112  | 0.587049938 |
| DOPEY1   | 1.333945116  | 0.185695831 | -0.412394414 | 0.681581341 | -0.874447301 | 0.38559391  |
| DOPEY2   | -0.07784073  | 0.938133107 | 1.054966286  | 0.29584606  | 1.410501531  | 0.163899264 |
| DOT1L    | 2.145170309  | 0.034719933 | -1.776965317 | 0.080854549 | -0.908904807 | 0.367279229 |

|              |              |             |              |             |              |             |
|--------------|--------------|-------------|--------------|-------------|--------------|-------------|
| DPAGT1       | -0.309745418 | 0.757493652 | -1.372331659 | 0.175281142 | -0.31482001  | 0.754063453 |
| DPCD         | -1.555341409 | 0.123487342 | 0.994098892  | 0.324332849 | 0.784901286  | 0.435805576 |
| DPEP2        | -1.932217294 | 0.056579667 | 0.592584928  | 0.555778446 | 1.795537847  | 0.077941429 |
| DPEP3        | -1.245377942 | 0.216329407 | 0.653100307  | 0.516290255 | 0.297374055  | 0.767276682 |
| DPF2         | -2.377373545 | 0.019623092 | -0.97123458  | 0.335492649 | -0.667327656 | 0.507292037 |
| DPF3         | 0.025781402  | 0.979490612 | -2.196940947 | 0.032062302 | -2.218031474 | 0.03060818  |
| DPH1         | 0.945664868  | 0.346932957 | -1.932866463 | 0.058174312 | -0.896502392 | 0.373806228 |
| DPH2         | 1.039786724  | 0.301313859 | 0.833887281  | 0.407789596 | 2.145669988  | 0.036230309 |
| DPH3         | -1.589473812 | 0.115573218 | -0.731414249 | 0.467491567 | -0.936325093 | 0.353109453 |
| DPH3P1       | -0.91758953  | 0.361365097 | -2.546850643 | 0.013565314 | -2.602493472 | 0.01181048  |
| DPH5         | 1.281387922  | 0.2034549   | 0.407508367  | 0.685145352 | 1.460134484  | 0.149817375 |
| DPM1         | 0.907315954  | 0.36674061  | -1.405744861 | 0.165171584 | -1.397052642 | 0.167886195 |
| DPM2         | -2.68164493  | 0.008761695 | -0.679228213 | 0.499713817 | -0.57379071  | 0.568397245 |
| DPM3         | -0.071444448 | 0.943207662 | -1.384866728 | 0.171434326 | -0.703508084 | 0.484641784 |
| DPP3         | -1.334036441 | 0.185666021 | 1.811399251  | 0.075294266 | 1.899954207  | 0.062570909 |
| DPP4         | -0.23324038  | 0.816121462 | 0.95910944   | 0.341512576 | 1.21426797   | 0.229719898 |
| DPP7         | 0.752420254  | 0.453824974 | -0.097328206 | 0.922803656 | 0.235836219  | 0.814416544 |
| DPP8         | 0.342115112  | 0.733087555 | -2.366015928 | 0.02136703  | -3.338815634 | 0.001497726 |
| DPP9         | 0.609687469  | 0.543654507 | -0.636376105 | 0.527052301 | -0.435823581 | 0.664633125 |
| DPPA4        | 1.746934679  | 0.084170028 | -0.862246048 | 0.392128035 | -0.719230333 | 0.474977232 |
| DPRXP4       | -0.619787612 | 0.537014034 | -1.355889019 | 0.180426901 | -0.940018102 | 0.351228525 |
| DPY19L1      | 0.811914692  | 0.41905173  | -0.8635372   | 0.391423998 | -1.936617969 | 0.05782262  |
| DPY19L1P1    | 0.2368413    | 0.813335481 | 0.052724026  | 0.958134238 | 1.726331933  | 0.089778154 |
| DPY19L2      | 0.287434586  | 0.774461638 | -1.80079408  | 0.076971583 | 0.168903777  | 0.866478382 |
| DPY19L2P2    | 1.858921277  | 0.066411797 | -0.739544785 | 0.462579881 | -1.202849305 | 0.234074403 |
| DPY19L3      | -1.9279404   | 0.057117472 | -1.427691798 | 0.15878031  | -1.689625085 | 0.096636876 |
| DPY19L4      | 1.700029081  | 0.092690303 | -1.120626433 | 0.267097811 | -1.56376588  | 0.123482893 |
| DPY30        | 0.299861908  | 0.764996217 | -1.738907001 | 0.087393878 | -1.448757764 | 0.152958488 |
| DPYD         | -0.661467531 | 0.510056837 | 2.311834218  | 0.024384022 | 1.049425768  | 0.298471256 |
| DPYSL2       | -0.279717756 | 0.780356567 | 2.155882308  | 0.035282893 | 1.572573972  | 0.121427256 |
| DPYSL4       | -0.700588662 | 0.485425169 | 0.443967037  | 0.658729952 | -0.649569713 | 0.518614664 |
| DR1          | -0.967164611 | 0.336136902 | -1.181597054 | 0.242221381 | -3.161018709 | 0.002532532 |
| DRAM1        | -1.652345481 | 0.10206109  | -0.214591075 | 0.830844117 | -1.342644026 | 0.184781855 |
| DRAM2        | 1.301569647  | 0.196492156 | -0.396403697 | 0.693272077 | 0.206037981  | 0.837505333 |
| DRAP1        | -2.169341125 | 0.032778029 | -1.960890113 | 0.054733459 | -3.301722292 | 0.001673364 |
| DRD4         | 0.694339533  | 0.489315323 | -2.806740336 | 0.006817246 | -2.515366251 | 0.014774335 |
| DRG1         | 0.465955359  | 0.642409417 | 2.110479894  | 0.039170792 | 3.200843047  | 0.002254551 |
| DRG2         | -0.948554418 | 0.345469051 | 1.479715652  | 0.14439833  | 2.369756848  | 0.021255404 |
| DROSHA       | 0.229189151  | 0.819258668 | 0.663829023  | 0.509448366 | 0.988411714  | 0.327184784 |
| DRP2         | 0.266872621  | 0.790197425 | -1.425807743 | 0.159321326 | -0.84528013  | 0.401536505 |
| DSC1         | 2.027478076  | 0.045667209 | 0.372942932  | 0.710559916 | 0.527855078  | 0.599676602 |
| DSC2         | -0.460175315 | 0.646535961 | 0.203663085  | 0.839334658 | -0.262506654 | 0.793890118 |
| DSCAML1      | 0.226379399  | 0.821436228 | -0.512592678 | 0.610196549 | -0.170938958 | 0.864885319 |
| DSCC1        | 0.130203233  | 0.896705567 | 0.634949718  | 0.527975593 | 1.044417311  | 0.300761114 |
| DSCR3        | -0.622809075 | 0.535035624 | -0.127988479 | 0.898603927 | 0.027038042  | 0.978525112 |
| DSE          | -1.986970278 | 0.05006512  | 0.667701149  | 0.50699106  | -2.132527135 | 0.037343242 |
| DSEL         | 2.706086516  | 0.008189087 | 1.157867847  | 0.251696868 | 0.64373739   | 0.522362457 |
| DSG3         | -0.910308611 | 0.365169531 | 1.970035925  | 0.053648861 | 0.881880063  | 0.381595548 |
| DSN1         | 0.225091257  | 0.822435007 | 3.469328214  | 0.000994756 | 3.439136652  | 0.001105955 |
| DSP          | -0.702037212 | 0.484525868 | 0.151645702  | 0.879996307 | 0.97857729   | 0.331979943 |
| DST          | -0.36757733  | 0.714079187 | 2.216589511  | 0.030614686 | 1.069478303  | 0.289423214 |
| DSTN         | -0.246305976 | 0.80602433  | 1.888661678  | 0.063976232 | 2.534188273  | 0.014082236 |
| DSTNP2       | -0.60405669  | 0.547374499 | 3.160969378  | 0.002507291 | 3.650873002  | 0.000574272 |
| DSTYK        | 0.913045939  | 0.363736244 | 1.348960427  | 0.182629394 | 1.704798837  | 0.093751139 |
| DTD1         | -0.938062681 | 0.350803532 | 1.516839702  | 0.134776923 | 1.182650043  | 0.241923892 |
| DTHD1        | -0.237660203 | 0.812702241 | -1.811520673 | 0.07527524  | -3.155012709 | 0.002577148 |
| DTL          | 0.029839793  | 0.976263021 | 1.091092714  | 0.279775499 | 0.887009902  | 0.378851308 |
| DTNA         | -0.341693996 | 0.733403374 | 1.199305905  | 0.235319632 | -0.003437311 | 0.997269592 |
| DTNB         | 1.547926757  | 0.125262199 | 2.453122561  | 0.017211374 | 2.678571567  | 0.009676797 |
| DTNBP1       | -1.226308898 | 0.22338408  | 1.874944722  | 0.065873457 | 2.001296743  | 0.050194596 |
| DTWD1        | 0.737108117  | 0.463035563 | -1.808027693 | 0.075824162 | -1.532391513 | 0.131032541 |
| DTWD2        | 0.336376146  | 0.737395469 | -1.426206963 | 0.159206569 | -0.955006136 | 0.343661866 |
| DTX1         | 0.138671979  | 0.89002915  | 0.765458598  | 0.447123922 | 0.824294808  | 0.41325455  |
| DTX2         | -1.396933879 | 0.165978882 | 0.89260991   | 0.375780375 | 1.0269954    | 0.308819823 |
| DTX2P1-UPK3B | -0.366035816 | 0.715225    | -2.520299987 | 0.014519691 | -2.031555546 | 0.046934029 |
| DTX3         | 1.680260945  | 0.096486225 | -2.490883609 | 0.01564768  | -0.526525609 | 0.600593697 |
| DTX3L        | -1.174687394 | 0.243318081 | 1.184530725  | 0.241068037 | -0.60823718  | 0.545478993 |
| DTX4         | -2.256556063 | 0.026536233 | 1.313700921  | 0.194155703 | 2.079642874  | 0.042128782 |
| DTYMK        | 0.785943155  | 0.43403156  | 2.127060479  | 0.037709683 | 2.186480021  | 0.032957481 |
| DUOX1        | 1.968926215  | 0.05213756  | 0.215912067  | 0.829819118 | 0.709736321  | 0.480800216 |
| DUS1L        | 0.657216263  | 0.512773068 | 0.653345719  | 0.516133207 | 1.191639924  | 0.238407214 |
| DUS2L        | -0.819368676 | 0.414810236 | 3.520788258  | 0.000848699 | 4.185012242  | 0.00010114  |

|          |              |             |              |             |               |             |
|----------|--------------|-------------|--------------|-------------|---------------|-------------|
| DUS3L    | 1.170501037  | 0.244988752 | -0.692817818 | 0.491208062 | 0.362941014   | 0.71800957  |
| DUS4L    | 2.138198427  | 0.035298316 | -1.439725285 | 0.155358432 | -1.021264173  | 0.311502629 |
| DUSP1    | 0.945892929  | 0.34681727  | -2.389030463 | 0.020189757 | -2.640164049  | 0.010705487 |
| DUSP10   | -0.011674316 | 0.990712126 | -1.130986841 | 0.262755609 | -1.871369541  | 0.066498962 |
| DUSP11   | -0.118349794 | 0.906062741 | -1.139931714 | 0.259033095 | -1.001363988  | 0.320940196 |
| DUSP12   | 0.408068091  | 0.684224057 | -0.616345    | 0.540095304 | -0.073052893  | 0.94202324  |
| DUSP13   | -2.209170933 | 0.029784174 | -0.004136901 | 0.996713536 | 0.856765977   | 0.395210484 |
| DUSP14   | 0.988361305  | 0.325710669 | -1.847644883 | 0.069791155 | -0.942111867  | 0.350165027 |
| DUSP16   | 0.959462134  | 0.33997914  | 0.62604583   | 0.533758083 | 0.768037338   | 0.445678118 |
| DUSP18   | -1.37772586  | 0.890737828 | -1.993823149 | 0.050913819 | -0.88248564   | 0.381270941 |
| DUSP19   | 1.585176699  | 0.116546678 | -0.148602119 | 0.882386661 | 0.37004523    | 0.712738788 |
| DUSP2    | 3.107777651  | 0.002545064 | -1.502478693 | 0.138436784 | -1.0085992    | 0.317486966 |
| DUSP22   | 0.365216344  | 0.715834382 | 0.21469943   | 0.83076003  | -0.992302319  | 0.325300577 |
| DUSP23   | 0.277632884  | 0.781951435 | -0.575112533 | 0.567455137 | -0.485731494  | 0.629044752 |
| DUSP28   | 1.290552424  | 0.200270797 | -3.136937519 | 0.002689135 | -2.338797527  | 0.022924858 |
| DUSP3    | 0.622360444  | 0.535329145 | 1.898018007  | 0.062708869 | 0.695801769   | 0.489418578 |
| DUSP4    | -0.504508663 | 0.615176645 | 0.423396372  | 0.673582973 | 0.980476085   | 0.331050496 |
| DUSP5    | -1.202644102 | 0.232369881 | -1.280022305 | 0.205668885 | -1.758429349  | 0.084115207 |
| DUSP6    | -1.294164978 | 0.199025877 | -0.649306312 | 0.518721403 | -1.45269691   | 0.151865117 |
| DUSP7    | 0.670429465  | 0.504356033 | -0.57026614  | 0.570715185 | 0.008071791   | 0.993588278 |
| DUSP8    | 0.285239559  | 0.776137102 | -2.601986487 | 0.011762786 | -0.1286731755 | 0.204599406 |
| DUT      | 1.663354999  | 0.099832044 | -0.853235705 | 0.397063092 | -0.917546733  | 0.362774628 |
| DVL1     | 1.449260561  | 0.150852154 | -1.720667937 | 0.090679713 | -1.735904931  | 0.088057108 |
| DVL2     | -0.221184448 | 0.825465994 | -2.222967306 | 0.030157342 | -1.49637487   | 0.140147481 |
| DVL3     | -0.508615708 | 0.612306217 | -2.30263078  | 0.024932564 | -2.085250716  | 0.041597235 |
| DYM      | -0.467089065 | 0.64160134  | -0.21796684  | 0.828225347 | 0.691538385   | 0.492072399 |
| DYNC1H1  | 0.22756443   | 0.820517656 | 1.885709484  | 0.064380601 | 1.700162342   | 0.09462528  |
| DYNC1I2  | 1.773862599  | 0.079577165 | 3.343332393  | 0.001459643 | 3.831269807   | 0.00032352  |
| DYNC1LI1 | -3.709074035 | 0.000365285 | 0.11630198   | 0.907817785 | 0.106271801   | 0.91574489  |
| DYNC1LI2 | 1.303540371  | 0.195821883 | 0.263978226  | 0.79273893  | -0.068062644  | 0.945977189 |
| DYNC2H1  | -1.260293461 | 0.210926107 | 0.218783466  | 0.827592137 | 1.067860189   | 0.290146223 |
| DYNC2LI1 | 0.165305268  | 0.869086392 | 0.314079737  | 0.754595278 | 1.670378386   | 0.100401747 |
| DYNLL1   | -1.610193198 | 0.110970428 | -1.877895053 | 0.065461421 | -1.368009296  | 0.176750746 |
| DYNLL2   | -0.892909023 | 0.374363793 | -0.817678942 | 0.416910326 | -0.262652497  | 0.79377826  |
| DYNLRB1  | -2.512035815 | 0.013845103 | -1.423378716 | 0.160020945 | -1.009114893  | 0.317241793 |
| DYNLT1   | -2.437368542 | 0.016825931 | -1.936365411 | 0.05773486  | -2.321343869  | 0.023916728 |
| DYNLT3   | 0.597925398  | 0.551439674 | -1.067982264 | 0.28998438  | -1.445975284  | 0.153734508 |
| DYRK1A   | -1.012148092 | 0.314267865 | -0.619698442 | 0.537900252 | -2.414636294  | 0.019028224 |
| DYRK1B   | -1.305167876 | 0.19526963  | -2.289001897 | 0.025765015 | -2.230501894  | 0.029721147 |
| DYRK2    | 1.248264551  | 0.215275869 | -1.976225238 | 0.052925366 | -2.132493137  | 0.037346159 |
| DYRK3    | -0.639689409 | 0.524051842 | 1.57693631   | 0.120287319 | 1.342708671   | 0.18476104  |
| DYRK4    | 0.635259137  | 0.526923134 | -1.691943198 | 0.096060816 | -0.533245895  | 0.595964597 |
| DYSF     | -1.707668463 | 0.091256432 | 0.439593109  | 0.661876852 | 0.047272732   | 0.96246334  |
| DZIP1L   | 0.196776105  | 0.844460715 | 0.63235432   | 0.529657744 | -0.322655749  | 0.748152525 |
| DZIP3    | 1.845717406  | 0.068327187 | -0.458696547 | 0.648178342 | 0.602520796   | 0.549249478 |
| E2F1     | -1.728088449 | 0.087512584 | 0.977254189  | 0.332530219 | -0.391859892  | 0.696642784 |
| E2F2     | -2.767250862 | 0.006902375 | 1.951230326  | 0.055899329 | 1.976173938   | 0.053048066 |
| E2F3     | -0.824799186 | 0.411736465 | 0.987928447  | 0.327319853 | -0.971207277  | 0.335603901 |
| E2F4     | -1.094435794 | 0.276778172 | -0.128309842 | 0.898350751 | 0.134598914   | 0.893409578 |
| E2F5     | 0.074637181  | 0.940674369 | -1.05020898  | 0.298008665 | -0.17899367   | 0.858585988 |
| E2F6     | 1.064382433  | 0.290094378 | -0.592379965 | 0.555914721 | 0.244905105   | 0.80742136  |
| E2F8     | -1.468387963 | 0.145597481 | 0.075394438  | 0.940162148 | 0.078746204   | 0.937514027 |
| E4F1     | 0.7526828    | 0.453667969 | -1.052915062 | 0.296777192 | -0.324530108  | 0.746740829 |
| EAF1     | -1.061805403 | 0.291256312 | 0.732209612  | 0.46700978  | -0.374765055  | 0.709244795 |
| EAF2     | 0.141685448  | 0.88765534  | -1.097470198 | 0.277002951 | -1.386883387  | 0.170950215 |
| EAPP     | -1.894731124 | 0.061442391 | -0.834524488 | 0.407433538 | -0.141035823  | 0.88834563  |
| EARS2    | 0.522285591  | 0.602796    | 0.892249804  | 0.375971688 | 2.149347085   | 0.035924177 |
| EBAG9    | 1.723509449  | 0.088340957 | -0.284445194 | 0.777089406 | -0.309306953  | 0.758231162 |
| EBF1     | -0.823677127 | 0.412370442 | -0.336138386 | 0.737988041 | 0.861718018   | 0.392502254 |
| EBF4     | 1.177988119  | 0.242006598 | 0.272268836  | 0.786389006 | -0.037194445  | 0.970461686 |
| EBI3     | -3.111242047 | 0.002518374 | -0.838125912 | 0.405424716 | -0.75052726   | 0.456066083 |
| EBLN2    | 0.596885645  | 0.552130546 | -0.084383038 | 0.933044512 | -1.573825483  | 0.12113742  |
| EBNA1BP2 | 0.925407561  | 0.357308266 | 2.469655154  | 0.016510211 | 3.423245509   | 0.001160747 |
| EBP      | 1.018782511  | 0.311124877 | 1.238918386  | 0.22040091  | 2.299514343   | 0.02521095  |
| EBPL     | -0.517756495 | 0.605939425 | 1.83393373   | 0.071831718 | 0.265700676   | 0.791441386 |
| ECD      | 0.724307463  | 0.470816129 | 1.432517141  | 0.157401195 | 0.985919083   | 0.328395774 |
| ECE1     | -2.979701542 | 0.003737533 | 0.32845967   | 0.743755331 | 0.454285364   | 0.651372036 |
| ECE2     | -0.032656027 | 0.974023532 | 0.868172727  | 0.38890284  | -0.394491863  | 0.694710049 |
| ECH1     | -1.38865244  | 0.168475793 | 2.187343015  | 0.032791073 | 2.030649906   | 0.047028896 |
| ECHDC1   | 0.930777243  | 0.354538867 | -0.583752669 | 0.561665933 | -0.611504648  | 0.543329733 |
| ECHDC2   | 0.662603659  | 0.509332237 | 0.49830796   | 0.620164568 | 2.11801074    | 0.038607102 |
| ECHDC3   | -1.56948196  | 0.120157908 | 0.553620699  | 0.581981351 | 0.12153001    | 0.903704462 |

|         |              |             |              |             |              |             |
|---------|--------------|-------------|--------------|-------------|--------------|-------------|
| ECHS1   | -0.740704762 | 0.460862623 | 2.922963319  | 0.00494781  | 3.545394475  | 0.000798008 |
| ECI1    | -0.836864371 | 0.404956723 | 0.870683241  | 0.387541673 | 0.283228172  | 0.778041947 |
| ECI2    | 0.882199015  | 0.380094933 | 1.761499792  | 0.083461021 | 2.760692847  | 0.007774156 |
| ECM1    | 0.662395769  | 0.509464784 | -0.419339627 | 0.676527861 | -1.292315525 | 0.201532958 |
| ECRP    | -0.099810352 | 0.920724028 | -1.283922288 | 0.204309947 | -0.971449019 | 0.335484619 |
| ECSIT   | -1.481849091 | 0.14198571  | 1.536390427  | 0.129918324 | 0.897183224  | 0.373446027 |
| ECT2    | -1.116060492 | 0.267462688 | -0.879507721 | 0.382780851 | -2.109225784 | 0.039389954 |
| ECT2L   | -0.789292022 | 0.432082503 | -1.62175631  | 0.11031756  | -2.01088315  | 0.049141114 |
| EDA     | 3.753959774  | 0.000313303 | 4.3016439    | 6.64E-05    | 3.323118686  | 0.001569811 |
| EDAR    | 3.124774691  | 0.002416592 | 0.374488929  | 0.709415861 | 0.487208329  | 0.628004475 |
| EDARADD | 0.412196724  | 0.681206944 | 0.219214879  | 0.827257666 | -0.173019452 | 0.86325737  |
| EDC3    | 0.822513518  | 0.413028518 | 2.248209361  | 0.028405846 | 2.534940434  | 0.014055199 |
| EDC4    | 0.063231994  | 0.949726508 | 1.018215603  | 0.312833581 | 2.020026642  | 0.048154112 |
| EDEM1   | 0.553161308  | 0.581568578 | 0.266001066  | 0.791188282 | 0.295580701  | 0.768638955 |
| EDEM2   | -2.470147292 | 0.015453109 | 1.86883634   | 0.066733514 | 1.060281165  | 0.293549307 |
| EDEM3   | 0.85857765   | 0.392927809 | -0.167988648 | 0.867180695 | -1.575329387 | 0.120789868 |
| EDF1    | -1.292209855 | 0.199698914 | -1.148672956 | 0.255438975 | -0.618446691 | 0.538777843 |
| EDN1    | 0.573442206  | 0.567821498 | -0.82159407  | 0.414695974 | -0.028365028 | 0.977471439 |
| EEA1    | 1.090139325  | 0.278655479 | -0.932030399 | 0.355211362 | -1.806743169 | 0.076153374 |
| EED     | 1.313147134  | 0.192578873 | -0.244032386 | 0.808072924 | -0.34733494  | 0.729636264 |
| EEF1A1  | 0.387744497  | 0.699150125 | -0.081607344 | 0.935241891 | 0.352741727  | 0.725660755 |
| EEF1A2  | -1.023508397 | 0.308898944 | 2.660751011  | 0.010083941 | 2.702523056  | 0.009081938 |
| EEF1B2  | 0.526077076  | 0.60017027  | -0.079010603 | 0.93729806  | 1.008707956  | 0.31743525  |
| EEF1D   | 0.326349436  | 0.744942051 | 1.65636597   | 0.10308629  | 1.974576358  | 0.053234136 |
| EEF1E1  | 1.245390147  | 0.216324945 | -1.215789516 | 0.229024792 | -0.463397182 | 0.644868191 |
| EEF1G   | 0.448509392  | 0.654898274 | 0.954309683  | 0.343915057 | 1.430787732  | 0.158024519 |
| EEF2    | 0.389566107  | 0.697807354 | 0.803101818  | 0.425217685 | 0.879062748  | 0.383108004 |
| EEF2K   | 1.182478766  | 0.240230457 | 1.069434322  | 0.289335461 | 1.222183489  | 0.226736236 |
| EEFSEC  | 0.015214449  | 0.987895855 | 0.650031988  | 0.518255929 | 1.66725876   | 0.101023143 |
| EEDP1   | -3.432208453 | 0.000917598 | 0.959372509  | 0.341381218 | 0.959695613  | 0.341316514 |
| EFCAB11 | 1.562321063  | 0.121834916 | -0.019353885 | 0.984625688 | 0.420404864  | 0.675791817 |
| EFCAB2  | -1.655566875 | 0.101404738 | -1.930497703 | 0.058473434 | -3.430753887 | 0.001134545 |
| EFCAB4A | -0.623862251 | 0.534346899 | -0.502412689 | 0.617292794 | -0.177049612 | 0.860105544 |
| EFCAB4B | 0.890214557  | 0.375800513 | -0.428048326 | 0.670212319 | -1.056931405 | 0.295062123 |
| EFCAB5  | 0.700157767  | 0.485692858 | 0.443002938  | 0.65942306  | 0.291984053  | 0.771373261 |
| EFCAB7  | 1.398574363  | 0.165487641 | -0.295897083 | 0.768372899 | -0.869668537 | 0.388178417 |
| EFEMP2  | -0.00495066  | 0.99606127  | -2.036889573 | 0.046266282 | -1.369750974 | 0.176209251 |
| EFHA1   | 1.438108394  | 0.153983044 | 0.801990502  | 0.425855059 | 0.810962842  | 0.420805926 |
| EFHA2   | 0.73870612   | 0.462069401 | -0.307421522 | 0.759631409 | -0.796379122 | 0.429160869 |
| EFHC1   | 3.323343666  | 0.001301649 | -1.357202106 | 0.180011783 | -0.919993284 | 0.361505843 |
| EFHC2   | 1.368207706  | 0.174762721 | -1.922742057 | 0.059461989 | -2.111647558 | 0.039172773 |
| EFHD1   | -2.462943072 | 0.01574593  | 0.708537786  | 0.481469273 | 1.224224041  | 0.225971695 |
| EFHD2   | -1.38660994  | 0.169096008 | 0.177808337  | 0.859497378 | -0.199797224 | 0.842359886 |
| EFNA1   | 1.851580516  | 0.067471039 | 0.718730945  | 0.475212505 | 2.079810414  | 0.042112817 |
| EFNA3   | -0.352963402 | 0.724967781 | -1.662758416 | 0.101793929 | -0.523769275 | 0.602497142 |
| EFNA4   | -0.7835955   | 0.435400984 | 1.103040881  | 0.27459692  | 0.585032366  | 0.560866076 |
| EFNA5   | -0.591218679 | 0.55590359  | -1.689336143 | 0.096561927 | -0.964747195 | 0.338801863 |
| EFNB1   | 0.619483032  | 0.537213676 | 0.016798422  | 0.986655484 | -0.193397762 | 0.847344288 |
| EFR3A   | 0.73010807   | 0.467281307 | -0.25316865  | 0.801039344 | -2.022791106 | 0.047859087 |
| EFR3B   | 1.609686124  | 0.111081291 | 1.195337826  | 0.236853578 | 0.597538187  | 0.552546705 |
| EFTUD1  | 0.314040168  | 0.754240693 | 2.811376219  | 0.006731644 | 3.098652216  | 0.003033301 |
| EFTUD2  | -0.233319187 | 0.816060465 | 2.211703768  | 0.030969161 | 2.355555086  | 0.022007238 |
| EGF     | -3.708017345 | 0.000366602 | 0.606968336  | 0.54625727  | -0.632341583 | 0.529726325 |
| EGFL7   | -4.128983799 | 8.32E-05    | 0.810716995  | 0.420865556 | -0.078480811 | 0.937724179 |
| EGLN1   | -1.031446874 | 0.305184012 | -0.994682269 | 0.324051391 | -2.239691325 | 0.029082094 |
| EGLN2   | 0.749186188  | 0.455761535 | -5.24217462  | 2.36E-06    | -5.091037296 | 4.28E-06    |
| EGLN3   | -0.960641217 | 0.339389127 | 2.863005685  | 0.005843053 | 1.689139915  | 0.096730336 |
| EGR1    | -1.815731406 | 0.072849067 | 0.933729446  | 0.354341517 | 0.162734838  | 0.871310572 |
| EGR2    | 0.662042367  | 0.509690149 | 0.032063504  | 0.974532262 | -1.097640036 | 0.277039317 |
| EGR3    | -0.768473393 | 0.444282517 | 1.014705353  | 0.314489985 | 0.405403114  | 0.686719431 |
| EHP1    | 1.204473473  | 0.231666074 | 0.553042776  | 0.582374417 | 0.374924658  | 0.709126753 |
| EHP1L1  | -0.378273663 | 0.706146753 | -0.152684635 | 0.879180611 | 0.08860066   | 0.929714053 |
| EHD1    | -2.235348954 | 0.027949264 | 0.29027213   | 0.772650606 | 0.222365795  | 0.824834749 |
| EHD3    | -3.417874709 | 0.000961223 | 0.80553144   | 0.423826217 | 0.102588484  | 0.918654524 |
| EHD4    | -1.934643762 | 0.056276457 | 1.737948988  | 0.08756398  | 1.069592504  | 0.289372233 |
| EHHADH  | 1.555799822  | 0.12337827  | 1.555992253  | 0.125188126 | -0.901520146 | 0.371156713 |
| EHMT1   | 1.126649479  | 0.26298203  | -0.719729506 | 0.47460204  | -0.636583741 | 0.526978762 |
| EHMT2   | 0.296343804  | 0.767672272 | 1.270272342  | 0.209095178 | 1.626269836  | 0.109483544 |
| EI24    | 2.487439241  | 0.014770065 | 1.689667105  | 0.096498193 | 2.246833352  | 0.028593839 |
| EID1    | 0.573752339  | 0.567612513 | -0.366160787 | 0.71558666  | -0.433778614 | 0.666108776 |
| EID2    | 0.081853353  | 0.934950942 | -1.135467312 | 0.260882523 | -1.865886001 | 0.067275872 |
| EID2B   | 1.232255257  | 0.221166458 | -1.107697102 | 0.272597122 | -1.131377752 | 0.262697723 |

|           |              |             |              |             |              |             |
|-----------|--------------|-------------|--------------|-------------|--------------|-------------|
| EIFD3     | 2.54605759   | 0.012651466 | -0.601635472 | 0.549777695 | -0.161557374 | 0.872233457 |
| EIF1      | -2.870793498 | 0.005138083 | -0.122283276 | 0.903100346 | 0.137579958  | 0.891063808 |
| EIF1AD    | 0.054284031  | 0.956833064 | 0.920112351  | 0.361351754 | 1.241333835  | 0.219635346 |
| EIF1AX    | 0.924903474  | 0.357568957 | -0.239665386 | 0.811440542 | -0.354086291 | 0.724598411 |
| EIF1B     | -3.504898065 | 0.000723652 | -0.858072582 | 0.394409122 | -0.951984927 | 0.34517845  |
| EIF2A     | 1.162931862  | 0.248030174 | 0.085251043  | 0.932357462 | 0.498438857  | 0.62011867  |
| EIF2AK1   | -2.475951358 | 0.015220754 | 0.224400599  | 0.823239763 | 1.008110927  | 0.317719219 |
| EIF2AK2   | -1.814215573 | 0.073084119 | -0.33276308  | 0.740521307 | -2.823233208 | 0.00656304  |
| EIF2AK3   | 1.313172339  | 0.192570418 | 0.100454633  | 0.920332256 | 1.105001874  | 0.27386403  |
| EIF2AK4   | 1.113269493  | 0.26865252  | 1.634050407  | 0.107703119 | 1.480221846  | 0.144394881 |
| EIF2B1    | 1.451000723  | 0.150368099 | 2.115867072  | 0.038690743 | 3.231008391  | 0.002063376 |
| EIF2B2    | -0.339532194 | 0.735025355 | -0.997982399 | 0.322462279 | -0.312869314 | 0.755537288 |
| EIF2B3    | 0.604732039  | 0.546927653 | 3.476302974  | 0.000973647 | 5.089636299  | 4.31E-06    |
| EIF2B4    | 0.87593172   | 0.383473994 | 1.656098052  | 0.103140746 | 2.364657662  | 0.021522668 |
| EIF2B5    | 1.959504317  | 0.053248415 | 2.672520997  | 0.009775212 | 3.905769444  | 0.000254262 |
| EIF2C1    | -1.310111936 | 0.193599114 | 0.526108436  | 0.600832896 | 0.917222536  | 0.362942972 |
| EIF2C2    | -3.156303887 | 0.002194127 | -0.489065294 | 0.626652725 | -1.42929868  | 0.158450094 |
| EIF2C3    | -1.028999053 | 0.306326278 | -3.17986851  | 0.002372461 | -3.676981028 | 0.000528958 |
| EIF2C4    | -0.874764088 | 0.384105595 | -0.876012285 | 0.38466223  | -1.672995033 | 0.099882954 |
| EIF2D     | 2.071932576  | 0.041226018 | 1.022079085  | 0.311017323 | 1.311705574  | 0.194949277 |
| EIF2S1    | 1.977090357  | 0.051191    | 1.140771359  | 0.258686306 | 1.737071232  | 0.087849308 |
| EIF2S2    | 0.706667564  | 0.481657384 | 2.639203547  | 0.010672317 | 3.12266569   | 0.002830402 |
| EIF2S3    | 0.09119505   | 0.9275468   | 1.748608702  | 0.085686632 | 2.652618567  | 0.010361456 |
| EIF3A     | 1.126779111  | 0.262927506 | 2.66874149   | 0.009873394 | 1.614393492  | 0.112039665 |
| EIF3B     | -0.317536031 | 0.7515961   | 2.967956556  | 0.004361508 | 2.901969005  | 0.005286113 |
| EIF3D     | -0.494753222 | 0.62201876  | 2.269466328  | 0.027001251 | 3.01806212   | 0.00381816  |
| EIF3E     | 0.787542625  | 0.433100016 | -0.262474022 | 0.793892553 | 0.129030439  | 0.897793933 |
| EIF3F     | 0.769912487  | 0.443432803 | 1.267170979  | 0.210193893 | 1.524566972  | 0.132971532 |
| EIF3G     | -0.235009303 | 0.814752573 | -0.72594693  | 0.470811007 | -0.280631836 | 0.780022635 |
| EIF3H     | 0.167514544  | 0.867353133 | 1.267657439  | 0.210021273 | 2.139761084  | 0.036727031 |
| EIF3I     | 0.501741463  | 0.617114039 | 1.227844037  | 0.224499835 | 2.022618641  | 0.047877447 |
| EIF3J     | 0.108867432  | 0.913557802 | -0.369423448 | 0.713166868 | 0.043877317  | 0.965157623 |
| EIF3K     | -0.139411441 | 0.889446557 | 2.551660488  | 0.013398633 | 3.079936173  | 0.003200802 |
| EIF3L     | -0.38404408  | 0.701880775 | 1.120080968  | 0.267328224 | 2.129143478  | 0.037634561 |
| EIF3M     | 1.13013182   | 0.261520085 | 3.002603295  | 0.003954796 | 3.441463135  | 0.001098143 |
| EIF4A2    | 1.490560731  | 0.139685843 | 0.214470382  | 0.830937782 | -0.261194233 | 0.794896906 |
| EIF4A3    | -0.779392775 | 0.437858822 | 3.788958791  | 0.000363855 | 3.529590553  | 0.000837972 |
| EIF4B     | 1.148496834  | 0.253904707 | 2.236265601  | 0.029223073 | 3.087678999  | 0.003130483 |
| EIF4E     | 1.578894384  | 0.11798164  | -1.473734483 | 0.145997815 | -1.290385753 | 0.202197195 |
| EIF4E2    | -2.748211874 | 0.007281589 | -0.942990788 | 0.349624377 | -0.828495454 | 0.410892432 |
| EIF4E3    | -0.350692157 | 0.726665206 | -0.070980511 | 0.943659156 | -0.230422605 | 0.818599568 |
| EIF4EBP1  | -1.587536867 | 0.116011202 | -1.095918134 | 0.27767592  | -1.288457782 | 0.202862447 |
| EIF4EBP2  | -2.738778519 | 0.007476442 | -0.894668766 | 0.374687752 | -0.898474667 | 0.372763382 |
| EIF4EBP3  | -0.986285961 | 0.326721941 | -2.830917365 | 0.006381598 | -2.76531404  | 0.007678071 |
| EIF4ENIF1 | 4.83E-05     | 0.999961536 | 1.35731425   | 0.179976363 | 1.980842143  | 0.052507553 |
| EIF4G1    | -0.279039438 | 0.780875359 | 1.883755813  | 0.064649387 | 1.50935753   | 0.136805769 |
| EIF4G2    | -0.093254673 | 0.925915197 | 1.693491541  | 0.095764216 | 1.555460077  | 0.12544677  |
| EIF4G3    | -2.202661814 | 0.030256462 | -0.039231437 | 0.96884154  | -0.689873549 | 0.493110855 |
| EIF4H     | -1.615619025 | 0.109789728 | -1.503207589 | 0.138249153 | -0.900870546 | 0.371499045 |
| EIF5      | 0.84489774   | 0.400480446 | 0.139718823  | 0.889369587 | -0.304085636 | 0.762184991 |
| EIF5A     | -1.247742647 | 0.215466071 | 0.372104109  | 0.711180935 | 1.215982481  | 0.229071212 |
| EIF5A2    | 0.489879836  | 0.625449314 | -2.372096181 | 0.021050184 | -2.68589895  | 0.009491132 |
| EIF5AL1   | 0.25499844   | 0.799324831 | 1.77223768   | 0.081644024 | 2.825551387  | 0.00652169  |
| EIF5B     | 0.697227195  | 0.487515601 | 2.564418992  | 0.012965458 | 2.776218263  | 0.007455665 |
| EIF6      | -1.102378922 | 0.273330621 | 1.089367837  | 0.280528686 | 1.44308479   | 0.154543903 |
| ELAC1     | 0.856883822  | 0.393858175 | -0.392418308 | 0.696197616 | 0.430169669  | 0.668716234 |
| ELAC2     | 1.287390288  | 0.201365238 | 1.483469647  | 0.143401498 | 2.512858683  | 0.014868827 |
| ELANE     | -2.285013251 | 0.024738956 | 1.265704407  | 0.210714945 | -0.366553326 | 0.715327771 |
| ELAVL1    | 0.263941249  | 0.792448036 | -0.960176139 | 0.340980148 | -0.351886931 | 0.72623824  |
| ELF1      | -0.4164233   | 0.678123622 | 0.468402102  | 0.641264934 | -1.749870792 | 0.085595382 |
| ELF2      | -0.505287593 | 0.614631786 | -2.267277562 | 0.027142981 | -2.628385982 | 0.011040393 |
| ELF3      | 0.49022128   | 0.625208689 | 2.378783165  | 0.020706577 | 1.181706046  | 0.24229533  |
| ELF4      | -1.84312842  | 0.06870812  | -1.151491084 | 0.254287867 | -1.566912997 | 0.122745237 |
| ELFN2     | 1.550861155  | 0.124557384 | -0.442991252 | 0.659431463 | 0.35771412   | 0.721896359 |
| ELK1      | -0.483201791 | 0.630163655 | -3.169033248 | 0.002448905 | -3.320642013 | 0.00158148  |
| ELK3      | 0.020936541  | 0.983344117 | -1.070915095 | 0.288674745 | -2.238548659 | 0.029160891 |
| ELK4      | 1.880587867  | 0.063366353 | -0.448570676 | 0.655424469 | -1.118939432 | 0.267922673 |
| ELL       | -2.711962958 | 0.008056595 | -1.44871816  | 0.15283891  | -1.418030639 | 0.161699461 |
| ELL2      | 0.736025942  | 0.463690503 | -1.135241544 | 0.260976299 | -1.722213084 | 0.090527155 |
| ELL3      | -0.102957501 | 0.918233138 | 0.137241936  | 0.891318199 | 1.027848918  | 0.308421634 |
| ELMO1     | -1.31928821  | 0.190526937 | -0.411858213 | 0.681972106 | -0.382993584 | 0.703168408 |
| ELMO2     | -0.76146423  | 0.44843457  | 1.17570836   | 0.244548474 | 1.136531878  | 0.260553942 |

|            |              |             |              |             |              |             |
|------------|--------------|-------------|--------------|-------------|--------------|-------------|
| ELMO3      | -0.067729343 | 0.94615617  | 0.239103281  | 0.811874272 | 0.752805836  | 0.454706438 |
| ELMOD2     | 0.365974435  | 0.715270638 | -0.235344312 | 0.814776272 | -0.502030935 | 0.617605778 |
| ELMOD3     | 0.605767335  | 0.546243002 | 1.21723734   | 0.228477822 | 1.250250944  | 0.216385393 |
| ELOF1      | -2.279931481 | 0.025051816 | -0.595167776 | 0.554062609 | -0.825500281 | 0.412575842 |
| ELOVL1     | -1.867074912 | 0.065251631 | -1.832872758 | 0.071991687 | -2.279734878 | 0.02643699  |
| ELOVL3     | -0.923873044 | 0.358102228 | -0.124448061 | 0.901393839 | -0.457863737 | 0.648814575 |
| ELOVL4     | 0.403320376  | 0.687699926 | -1.411681309 | 0.163423504 | -1.662574059 | 0.101962192 |
| ELOVL5     | -1.384185266 | 0.169834532 | -1.677923329 | 0.098780938 | -3.369041375 | 0.00136765  |
| ELOVL6     | 0.674668684  | 0.501671367 | -3.748609987 | 0.000414139 | -1.987751533 | 0.051716223 |
| ELOVL7     | -5.210850997 | 1.25E-06    | 0.824443034  | 0.413089126 | -0.361110446 | 0.719369958 |
| ELP2       | 1.831109256  | 0.070499896 | 2.83639769   | 0.006286489 | 3.694363575  | 0.000500707 |
| ELP3       | -0.655610924 | 0.513800747 | 1.511885206  | 0.136030794 | 1.781430471  | 0.080242353 |
| ELP4       | 0.184497774  | 0.854051431 | -0.81444477  | 0.418744923 | 0.518175378  | 0.60636868  |
| EMB        | 1.000848385  | 0.319669724 | -2.321605379 | 0.023813413 | -2.792353517 | 0.007137431 |
| EMBP1      | 1.157911413  | 0.250062244 | -1.570855339 | 0.121694096 | -1.384150572 | 0.171780906 |
| EMD        | -1.600673658 | 0.113066573 | -3.630004994 | 0.000603432 | -2.581250104 | 0.012478476 |
| EME1       | 0.659898125  | 0.511058673 | -0.992962571 | 0.324881549 | -1.265325617 | 0.210972303 |
| EME2       | 1.913021589  | 0.059027442 | -1.759349154 | 0.083828949 | -1.845407046 | 0.070245476 |
| EMG1       | 1.200756386  | 0.233097752 | -0.06503874  | 0.948368372 | -0.027102114 | 0.978474236 |
| EMID1      | -1.774699389 | 0.079437828 | 0.794266093  | 0.430301026 | 0.288796292  | 0.773799157 |
| EMID2      | 2.702212643  | 0.008277509 | 1.212167     | 0.230397524 | 0.043735746  | 0.96526997  |
| EMILIN1    | 0.507685839  | 0.612955578 | 1.329559305  | 0.188905509 | 0.181645622  | 0.856513982 |
| EMILIN2    | -1.193047995 | 0.236087044 | 2.722897109  | 0.008549133 | 1.403661868  | 0.165917636 |
| EML2       | 1.083841878  | 0.281422991 | -0.769148835 | 0.444947699 | 0.456203838  | 0.650000377 |
| EML3       | -0.060776214 | 0.95167653  | 0.241920175  | 0.809701307 | 1.321595483  | 0.19165427  |
| EML4       | 2.184665962  | 0.031596423 | 0.268092842  | 0.78958568  | -0.32283832  | 0.748014981 |
| EML5       | 1.814708048  | 0.073007684 | -0.063554317 | 0.949545163 | -0.627292611 | 0.533006164 |
| EML6       | 0.869605979  | 0.38690348  | -0.67220406  | 0.504141507 | 0.357971667  | 0.72170467  |
| EMP1       | 0.870258908  | 0.386548618 | 0.278343124  | 0.781745812 | 0.080023179  | 0.936502915 |
| EMP3       | -2.081701324 | 0.040301552 | -2.823162662 | 0.006518449 | -2.231918449 | 0.029621835 |
| EMR1       | -0.17212008  | 0.863742015 | 1.897565592  | 0.062769657 | 1.715802162  | 0.091703227 |
| EMR2       | -1.190231721 | 0.237186039 | -0.90454491  | 0.369474606 | -0.590208708 | 0.557415022 |
| EMR3       | -2.80116407  | 0.006271306 | -0.529312808 | 0.598622728 | -0.275018235 | 0.784310127 |
| EMR4P      | 2.281642459  | 0.024946093 | -0.766843997 | 0.446306191 | -1.927354263 | 0.058992363 |
| ENAH       | -0.705760247 | 0.482218722 | -0.056460773 | 0.955170156 | -0.044726976 | 0.964483374 |
| ENAM       | 1.500518433  | 0.137092851 | 0.183846618  | 0.854779506 | 2.145054055  | 0.03628181  |
| ENC1       | -1.038630091 | 0.301848606 | 1.721583758  | 0.090512326 | 0.971848671  | 0.335287482 |
| ENDOD1     | -4.346862293 | 3.73E-05    | 2.745494874  | 0.00804638  | 0.967077076  | 0.337646184 |
| ENDOG      | -0.384571243 | 0.701491524 | -1.035553153 | 0.304738995 | -1.549423881 | 0.12688963  |
| ENDOV      | 2.948209125  | 0.004101139 | -0.786913593 | 0.43455851  | -0.601226091 | 0.550105287 |
| ENG        | 0.235037994  | 0.814730376 | 0.811446371  | 0.420450125 | 0.857172945  | 0.39498748  |
| ENGASE     | 2.281962746  | 0.024926345 | 0.576996746  | 0.566190149 | 2.03534716   | 0.046538648 |
| ENHO       | 0.464711439  | 0.643296546 | 0.424253749  | 0.672961237 | -0.132314344 | 0.895207944 |
| ENKUR      | -4.238887575 | 5.56E-05    | 0.760032036  | 0.450335357 | -0.440767825 | 0.66107087  |
| ENO1       | -1.453955679 | 0.149548889 | 1.628064329  | 0.108969751 | 1.769067904  | 0.082305022 |
| ENO2       | 2.937334568  | 0.004234097 | 0.776412477  | 0.440682309 | 2.391539906  | 0.02014681  |
| ENO3       | 0.181650339  | 0.856278781 | 0.569182938  | 0.571445078 | 1.749818539  | 0.085604485 |
| ENO4       | 1.484534515  | 0.141273626 | 1.099658413  | 0.276056088 | 1.704439284  | 0.093818688 |
| ENOPH1     | 0.855624414  | 0.394550808 | -0.893693944 | 0.375204833 | -0.365511825 | 0.716100618 |
| ENOSF1     | 2.798287388  | 0.006322712 | 0.052438347  | 0.95836087  | 0.469332892  | 0.640646311 |
| ENOX2      | -0.148798701 | 0.882056096 | 0.377322502  | 0.707320731 | 1.029405711  | 0.307696248 |
| ENPP2      | -0.051322781 | 0.959185715 | 2.115245334  | 0.038745883 | 0.840634094  | 0.404113018 |
| ENPP3      | -2.259795335 | 0.026326019 | 0.654652046  | 0.515297668 | -1.706265522 | 0.093476006 |
| ENPP4      | 1.650900298  | 0.102356659 | -1.222708237 | 0.226419603 | -1.95787996  | 0.05521249  |
| ENPP5      | 0.908921587  | 0.365897156 | -1.524771643 | 0.132788634 | -1.523000144 | 0.133362534 |
| ENSA       | -0.465577046 | 0.642679164 | -1.110302463 | 0.271482619 | -0.24119753  | 0.810279281 |
| ENTPD1     | 0.194129161  | 0.846526337 | -1.22611018  | 0.225146614 | -1.551297973 | 0.126440244 |
| ENTPD2     | -2.263391828 | 0.02609434  | -0.788607607 | 0.43357538  | -1.486639819 | 0.142695313 |
| ENTPD3-AS1 | 0.847577924  | 0.398993775 | -0.603742092 | 0.548385665 | 0.70954493   | 0.480918012 |
| ENTPD4     | 1.508294158  | 0.135094432 | 0.160177522  | 0.873301679 | -0.34013647  | 0.735020985 |
| ENTPD5     | -0.947879281 | 0.345810731 | 0.242012211  | 0.809630335 | 0.256257755  | 0.798686922 |
| ENTPD6     | 1.070101825  | 0.287526963 | 2.574923636  | 0.01261839  | 3.213259636  | 0.002173926 |
| ENTPD7     | 0.027481088  | 0.978138827 | -0.638960541 | 0.525381569 | -1.194745574 | 0.237200992 |
| ENY2       | -0.731659634 | 0.466338346 | -1.331298593 | 0.188336287 | -0.837949713 | 0.405606293 |
| EOMES      | -0.34970537  | 0.727403112 | -2.108155418 | 0.039379522 | -0.995453607 | 0.323779743 |
| EP300      | -0.866044525 | 0.388842663 | -0.5320774   | 0.596718938 | -1.082075691 | 0.28383704  |
| EP400      | 1.852507622  | 0.067336486 | 0.432575008  | 0.666938961 | 0.499223211  | 0.619569572 |
| EP400NL    | 0.060056056  | 0.952248432 | -1.644416432 | 0.10553802  | -1.66774089  | 0.100926903 |
| EPAS1      | -3.104411599 | 0.002571248 | 0.687051757  | 0.494807273 | -1.997844327 | 0.050578725 |
| EPB41      | -2.847816414 | 0.005489355 | 1.228829088  | 0.22413299  | 1.042443357  | 0.301666897 |
| EPB41L2    | 0.793602374  | 0.429581463 | 1.497311222  | 0.139772764 | 1.442393912  | 0.154737853 |
| EPB41L3    | -0.643665036 | 0.521482172 | 2.013580251  | 0.048734095 | 0.764147287  | 0.447973884 |

|          |              |             |              |             |              |             |
|----------|--------------|-------------|--------------|-------------|--------------|-------------|
| EPB41L4A | -0.080183804 | 0.936274834 | -0.248628227 | 0.804532773 | -1.500189708 | 0.139158925 |
| EPB41L5  | 0.089147194  | 0.929169389 | 0.183314454  | 0.855195089 | -0.312737478 | 0.755636929 |
| EPB42    | -3.281591504 | 0.001485552 | 0.92399544   | 0.359343655 | -0.108920656 | 0.913653143 |
| EPB49    | -3.137738494 | 0.002322693 | 0.818582473  | 0.416398665 | -0.144220735 | 0.885841761 |
| EPC1     | 0.359908227  | 0.719786091 | -1.839837688 | 0.070946992 | -2.364693226 | 0.021520794 |
| EPC2     | -0.088670868 | 0.929546842 | -0.969206298 | 0.336494744 | -2.697933625 | 0.009193258 |
| EPDR1    | 1.174748438  | 0.24329378  | -1.432299425 | 0.157463218 | -1.223905163 | 0.226091046 |
| EPG5     | 0.039863383  | 0.968293183 | -0.096215871 | 0.923683128 | -0.6480255   | 0.51960557  |
| EPHA1    | 1.308910783  | 0.194003979 | 1.084626902  | 0.282606146 | 1.879137076  | 0.06541145  |
| EPHA2    | 1.640765984  | 0.104448842 | -0.015687456 | 0.987537949 | -0.847189737 | 0.400480452 |
| EPHA4    | 1.009875488  | 0.315349356 | 0.856955475  | 0.395021093 | 0.828887517  | 0.410672387 |
| EPHB1    | -2.602235138 | 0.010882062 | 0.613291568  | 0.542097972 | -1.369101792 | 0.176410935 |
| EPHB2    | -2.026755365 | 0.045742674 | 1.94927481   | 0.056137913 | 0.490034013  | 0.62601619  |
| EPHB3    | -0.439718086 | 0.661229317 | 1.595426675  | 0.11608987  | 0.451299829  | 0.653509027 |
| EPHB4    | -2.729876768 | 0.007664664 | 1.945493132  | 0.056601767 | 1.985123028  | 0.052016049 |
| EPHB6    | 1.418924465  | 0.159486028 | 2.17767019   | 0.033540216 | 3.229341854  | 0.002073527 |
| EPHX1    | 0.381026059  | 0.704110768 | -0.255259053 | 0.799432342 | 0.396675006  | 0.693108446 |
| EPHX2    | 4.298478266  | 4.46E-05    | 2.625036359  | 0.01107606  | 3.2151257    | 0.002162046 |
| EPHX4    | 1.379223257  | 0.171353559 | -2.066762653 | 0.043261982 | -2.253738271 | 0.0281287   |
| EPM2A    | 2.010118608  | 0.047509654 | 0.18365938   | 0.854925721 | 0.996071888  | 0.323481915 |
| EPM2AIP1 | 1.357596492  | 0.178095213 | -2.501377177 | 0.015236523 | -2.629612576 | 0.011005075 |
| EPN1     | -0.679538027 | 0.49859717  | -0.491623151 | 0.624854165 | -0.798320488 | 0.428042989 |
| EPN2     | -0.449113369 | 0.654464239 | -2.606828036 | 0.011615405 | -2.765672991 | 0.007670654 |
| EPOR     | -2.674508945 | 0.008935609 | -0.654331907 | 0.515502365 | -0.802620451 | 0.425573182 |
| EPPK1    | 1.203832947  | 0.231912326 | -0.437089998 | 0.663680526 | -0.034649267 | 0.972482109 |
| EPRS     | 1.629860623  | 0.106738654 | 2.469843296  | 0.016502382 | 2.687312066  | 0.009455703 |
| EPS15    | 0.841800195  | 0.402202836 | 1.063122634  | 0.292163437 | 0.176657254  | 0.860412291 |
| EPS15L1  | -1.958468195 | 0.053371794 | -0.723857074 | 0.472083366 | -1.313095011 | 0.194483801 |
| EPS8     | 3.600696464  | 0.000526671 | 0.058733027  | 0.953368056 | 0.868517216  | 0.388802704 |
| EPS8L1   | 1.27205347   | 0.312104447 | -1.82906369  | 0.072568471 | -2.835706871 | 0.006343363 |
| EPS8L2   | -0.32329563  | 0.747245487 | -2.105607258 | 0.039609451 | -1.37516813  | 0.174533151 |
| EPSTI1   | -1.417798751 | 0.159813585 | 1.352081391  | 0.181634769 | -0.726922491 | 0.470288676 |
| EPT1     | 0.902438135  | 0.369310531 | 0.316462225  | 0.752795802 | -0.428581562 | 0.669864943 |
| ERAL1    | -0.846303839 | 0.399700075 | 1.987606026  | 0.05161684  | 3.126873108  | 0.002796188 |
| ERAP1    | 1.272005347  | 0.206753454 | -0.832724378 | 0.408439893 | -1.358379751 | 0.179767615 |
| ERAP2    | 0.992649495  | 0.323627687 | -1.224151368 | 0.225878949 | -1.68033956  | 0.098438502 |
| ERBB2    | 0.876964361  | 0.382915954 | -0.726184736 | 0.470666349 | 0.671358296  | 0.504740749 |
| ERBB2IP  | 0.446255317  | 0.656519161 | -0.731920491 | 0.46718488  | -1.964472723 | 0.054423919 |
| ERBB3    | 1.067110509  | 0.288867802 | 1.093666103  | 0.278654422 | 1.054147277  | 0.296323562 |
| ERC1     | -0.080234407 | 0.936234705 | 1.678953615  | 0.098578918 | 1.198031397  | 0.235929619 |
| ERCC1    | 0.496248176  | 0.620968075 | 0.516128685  | 0.607740401 | 1.329862907  | 0.188932248 |
| ERCC2    | 0.623372813  | 0.53466691  | 1.199061037  | 0.235414081 | 1.532599568  | 0.130981292 |
| ERCC3    | 1.932550096  | 0.056537998 | -0.291772841 | 0.771508634 | 1.031948616  | 0.306513878 |
| ERCC4    | 1.248664202  | 0.215130303 | -0.114132108 | 0.909529994 | 0.419674022  | 0.67632258  |
| ERCC5    | 2.421017416  | 0.017550638 | -1.24873551  | 0.21681361  | -1.697349833 | 0.095158797 |
| ERCC6    | 0.55582415   | 0.579754614 | 0.545761551  | 0.587337491 | -0.015538116 | 0.987657871 |
| ERCC6L   | 1.121387222  | 0.265202087 | -0.080693782 | 0.935965223 | -0.274738842 | 0.784523695 |
| ERCC8    | 0.274779131  | 0.784135987 | -1.065794693 | 0.290963893 | -1.510048423 | 0.136629719 |
| EREG     | 2.048879449  | 0.043480366 | -0.216183241 | 0.829608742 | -1.702111673 | 0.094256949 |
| ERF      | -1.684613133 | 0.095639824 | -3.447123533 | 0.001064893 | 3.710070378  | 0.000476426 |
| ERG      | 0.899546884  | 0.370839175 | 1.312533053  | 0.194546648 | 1.1935994    | 0.237645644 |
| ERGIC1   | -3.876590186 | 0.000204801 | -2.209468291 | 0.031132553 | -2.762356538 | 0.007739438 |
| ERGIC2   | 0.2743754    | 0.784445184 | -1.91437502  | 0.060544394 | -2.32745215  | 0.023565337 |
| ERGIC3   | -0.44171933  | 0.659785935 | 1.949862496  | 0.056066121 | 1.947050182  | 0.056529081 |
| ERH      | 0.994030163  | 0.322958913 | -3.11548893  | 0.002861806 | -2.655957929 | 0.010270945 |
| ERI1     | -0.062735347 | 0.950120848 | -1.058569012 | 0.294215501 | -1.510442023 | 0.136529504 |
| ERI2     | 0.56368128   | 0.574418025 | -0.48069524  | 0.632554036 | -1.442485746 | 0.154712062 |
| ERI3     | -0.046227297 | 0.963234803 | 1.459225701  | 0.149935567 | 2.880033049  | 0.005616536 |
| ERICH1   | -3.069151738 | 0.002861001 | 0.043637756  | 0.96534409  | -0.651842904 | 0.517157808 |
| ERLEC1   | 0.615742634  | 0.539668472 | -0.956584969 | 0.342774803 | -0.991863383 | 0.325512789 |
| ERLIN1   | 0.066841573  | 0.946860864 | 0.311746405  | 0.756358955 | -0.058568933 | 0.95350308  |
| ERLIN2   | 0.186221904  | 0.852703337 | -0.331861686 | 0.74119832  | 0.087841856  | 0.930314423 |
| ERMAP    | -2.239150076 | 0.027691243 | 1.463910674  | 0.148655055 | 1.030536451  | 0.307170108 |
| ERMN     | 3.192518229  | 0.001962218 | -1.425788134 | 0.159326965 | -1.550866491 | 0.126543596 |
| ERMP1    | 0.560162512  | 0.576805059 | 0.040625417  | 0.96773502  | 0.061467207  | 0.951205066 |
| ERN1     | -0.737915753 | 0.462547119 | -0.940209237 | 0.351036806 | -1.559474454 | 0.124494486 |
| ERO1L    | -0.211935142 | 0.832652283 | -0.72906388  | 0.468916941 | -0.824867844 | 0.412931833 |
| ERO1LB   | 0.859662476  | 0.39233266  | -1.101527866 | 0.275248952 | -1.837903796 | 0.071360803 |
| ERP27    | 2.525264943  | 0.013369438 | -2.254418033 | 0.027989063 | -0.637956625 | 0.526091174 |
| ERP29    | -0.507032128 | 0.613412273 | -1.245628494 | 0.21794426  | -0.539523296 | 0.591655711 |
| ERP44    | -1.989462565 | 0.049784467 | -0.225525196 | 0.822369047 | -0.791521184 | 0.4319658   |
| ERRFI1   | 0.272848879  | 0.785614581 | -0.046347941 | 0.963193257 | -1.586436519 | 0.118247763 |

|         |              |             |              |             |              |             |
|---------|--------------|-------------|--------------|-------------|--------------|-------------|
| ERV3-1  | -0.297268119 | 0.766968915 | -2.230476933 | 0.029626568 | -4.294635755 | 6.99E-05    |
| ESAM    | -4.612422827 | 1.36E-05    | 1.881488508  | 0.064962515 | 0.5974355    | 0.552614763 |
| ESCO1   | 0.413505471  | 0.68025162  | -0.179664787 | 0.858046327 | -0.818478214 | 0.416538952 |
| ESCO2   | -0.411214845 | 0.681924011 | -1.1063026   | 0.27319497  | -1.929042768 | 0.058777661 |
| ESD     | 0.406715079  | 0.685213927 | 1.178973925  | 0.243256007 | 2.345192891  | 0.022570705 |
| ESF1    | 1.070852081  | 0.287191336 | 0.253737928  | 0.800601624 | -0.432511409 | 0.66702386  |
| ESM1    | -1.777259363 | 0.079012811 | -0.810399636 | 0.421046392 | -1.458514994 | 0.150261408 |
| ESPL1   | 0.314806981  | 0.753660352 | 1.1048831    | 0.27380448  | 0.822314835  | 0.414370791 |
| ESPN    | -1.850334406 | 0.067652245 | -0.512971478 | 0.609933214 | 0.234993015  | 0.815067722 |
| ESPNL   | 0.078912825  | 0.937282794 | 1.307534259  | 0.196226704 | -0.414918197 | 0.679780452 |
| ESPNP   | 0.96233411   | 0.338543172 | 1.669984879  | 0.100348925 | 2.210963401  | 0.031121236 |
| ESR1    | 0.627837422  | 0.531751443 | 0.692632437  | 0.491323553 | 0.624948012  | 0.534532807 |
| ESR2    | 0.357441357  | 0.721625193 | 0.913787419  | 0.364638051 | 0.064453217  | 0.948837922 |
| ESRG    | -2.848768405 | 0.005474374 | 1.564835694  | 0.123099658 | 1.93547715   | 0.057965596 |
| ESRP2   | 0.23876367   | 0.811849151 | 0.415806625  | 0.679096696 | 0.47393637   | 0.637380198 |
| ESRRA   | -1.009815197 | 0.315378081 | -1.607144622 | 0.113491509 | -1.903870536 | 0.062048392 |
| ESYT1   | 0.519868579  | 0.604472601 | 3.015062162  | 0.00381739  | 3.0844523    | 0.00315961  |
| ESYT2   | 3.565083001  | 0.000593078 | -0.793149188 | 0.430946167 | 0.294346886  | 0.769576616 |
| ETAA1   | 0.792591151  | 0.430167445 | -0.281149045 | 0.779603644 | -0.13606018  | 0.892259593 |
| ETF1    | -2.710040153 | 0.008099731 | 2.396582712  | 0.019816285 | 1.896963121  | 0.062972493 |
| ETFA    | -0.219873661 | 0.826483526 | 0.435876117  | 0.664555937 | 1.318420587  | 0.192707431 |
| ETFB    | -0.597169116 | 0.551942149 | 3.428584995  | 0.00112702  | 3.434958851  | 0.001120117 |
| ETFDH   | 0.547336834  | 0.58554567  | 3.158646273  | 0.002524352 | 2.238075032  | 0.029193607 |
| ETHE1   | -0.205842684 | 0.837393668 | -0.41580012  | 0.679101429 | 0.029159134  | 0.976840909 |
| ETNK1   | 0.96007155   | 0.339674105 | -0.408349805 | 0.684531069 | -0.987091575 | 0.327825773 |
| ETNK2   | 0.417127411  | 0.677610498 | 0.794658715  | 0.430074377 | 0.10870593   | 0.913822685 |
| ETS1    | 2.863793483  | 0.005242846 | 2.239645322  | 0.028989742 | 1.987940414  | 0.051694735 |
| ETS2    | -1.002372924 | 0.318937328 | 0.716411913  | 0.476631938 | -1.053427799 | 0.296650147 |
| ETV3    | -0.772284568 | 0.442034271 | 0.220961959  | 0.825903502 | -0.648131485 | 0.519537528 |
| ETV5    | -0.544486218 | 0.587496812 | 2.244505801  | 0.028657067 | 1.703189109  | 0.094053872 |
| ETV6    | -1.09731523  | 0.275524945 | -0.072267321 | 0.942639541 | -1.292634394 | 0.201423359 |
| ETV7    | -2.370077621 | 0.019990002 | -0.644068059 | 0.522087964 | -2.672072663 | 0.009844244 |
| EVC     | 0.016116509  | 0.987178265 | 0.091733407  | 0.927228164 | -0.744064705 | 0.459935093 |
| EVC2    | 0.4480606    | 0.655220865 | 0.941897309  | 0.350179187 | 0.791060515  | 0.432232351 |
| EVI2A   | -0.316761566 | 0.752181722 | -0.499801653 | 0.61911885  | -0.682036586 | 0.498015384 |
| EVI2B   | -1.883480739 | 0.062968756 | -1.914006322 | 0.060592474 | -2.230990589 | 0.029686852 |
| EVI5    | -1.280957091 | 0.203605505 | 0.486851498  | 0.6282112   | 0.906059874  | 0.368769946 |
| EVI5L   | 0.668587291  | 0.505525066 | -1.198411381 | 0.235664798 | -0.298321081 | 0.766557596 |
| EVL     | 0.861262356  | 0.391455962 | -0.95866885  | 0.341732649 | 0.113957738  | 0.909677167 |
| EVPL    | -0.748311701 | 0.45628599  | 1.676346437  | 0.099090795 | 1.526400695  | 0.132515085 |
| EWSR1   | -0.545557416 | 0.586763258 | 0.873744069  | 0.38588617  | 1.498091578  | 0.139701939 |
| EXD2    | 2.228045797  | 0.028450926 | -0.054493371 | 0.956730672 | 0.917467916  | 0.362815551 |
| EXD3    | 2.268055818  | 0.025796566 | 0.128851537  | 0.897924016 | -0.163804727 | 0.870472158 |
| EXO1    | -0.90088552  | 0.370130923 | 1.254932314  | 0.214571525 | 2.885923969  | 0.00552597  |
| EXOC1   | 1.552448977  | 0.124177318 | 0.51706295   | 0.607092207 | -0.57486753  | 0.567673701 |
| EXOC2   | 2.347788216  | 0.021148938 | 0.840715621  | 0.403983974 | 1.24297297   | 0.219035259 |
| EXOC3   | -0.774059559 | 0.440989453 | 1.072267951  | 0.288072017 | 1.483121457  | 0.143625061 |
| EXOC3L1 | -1.804492449 | 0.074606885 | -1.255855335 | 0.214239036 | -2.258620306 | 0.027803882 |
| EXOC3L2 | -2.317459912 | 0.022821338 | 2.161763122  | 0.034804877 | 1.378626963  | 0.173469379 |
| EXOC4   | -1.073208419 | 0.286138979 | 1.568857249  | 0.122159207 | 1.382585272  | 0.172258104 |
| EXOC5   | 1.002636827  | 0.318810662 | -0.338333556 | 0.736342065 | -1.219578467 | 0.22771502  |
| EXOC6   | -0.531739595 | 0.59625862  | 0.669512489  | 0.505843756 | -0.790832575 | 0.432364277 |
| EXOC6B  | 0.792242023  | 0.430369868 | -0.792281297 | 0.431447872 | -0.653422223 | 0.516146927 |
| EXOC7   | 0.240787105  | 0.810285425 | 0.76305204   | 0.448546469 | 1.205580154  | 0.233027568 |
| EXOC8   | 0.162821958  | 0.871035405 | -1.065594335 | 0.29105372  | -2.980529293 | 0.004245033 |
| EXOG    | 1.531753057  | 0.12920388  | 0.391627944  | 0.696778349 | 1.868186036  | 0.066949073 |
| EXOSC1  | -0.086363914 | 0.931375159 | -3.312757025 | 0.00160011  | -1.596214431 | 0.116045702 |
| EXOSC10 | 0.489512663  | 0.625708117 | 0.208598228  | 0.835497841 | 0.633452441  | 0.529006122 |
| EXOSC2  | 1.349435387  | 0.180690804 | 0.434625467  | 0.665458356 | 2.563677702  | 0.013056802 |
| EXOSC3  | 1.09722035   | 0.275566177 | 0.037856352  | 0.969933121 | 0.399817489  | 0.690805522 |
| EXOSC4  | -0.037073414 | 0.970511221 | 1.543863131  | 0.128098526 | 1.847032369  | 0.070005823 |
| EXOSC5  | 0.405334344  | 0.686224646 | 1.500735027  | 0.138886453 | 1.857639067  | 0.068458735 |
| EXOSC6  | 0.760972355  | 0.448726785 | -0.638667479 | 0.525570882 | -0.748669044 | 0.457176633 |
| EXOSC7  | 0.437615548  | 0.662747138 | 0.124272701  | 0.901532059 | 1.201787298  | 0.234482432 |
| EXOSC8  | 2.631843428  | 0.010042457 | 0.69875105   | 0.487519615 | 1.085187455  | 0.282468783 |
| EXOSC9  | 1.308804064  | 0.194039981 | 1.084567186  | 0.282632382 | 2.102229855  | 0.040023243 |
| EXPH5   | 1.743346695  | 0.084798163 | 1.647203892  | 0.104961902 | 1.763914035  | 0.08317788  |
| EXT1    | -1.703762766 | 0.091987228 | 0.438449027  | 0.662700997 | -0.625328017 | 0.534285522 |
| EXT2    | -0.450941141 | 0.653151476 | 1.338601399  | 0.185960439 | 1.062023186  | 0.292764692 |
| EXTL2   | -0.142222108 | 0.887232702 | -1.033446319 | 0.305714954 | -0.52932553  | 0.598663013 |
| EXTL3   | -3.000794635 | 0.003510919 | 0.431595956  | 0.66764639  | 0.515222334  | 0.608417079 |
| EYA3    | -0.016400721 | 0.986952176 | 0.465781414  | 0.643128577 | 1.963578039  | 0.054530365 |



|           |              |             |              |             |              |              |
|-----------|--------------|-------------|--------------|-------------|--------------|--------------|
| EYS       | 1.247448765  | 0.215573228 | -2.333587425 | 0.023129937 | -2.044214868 | 0.045625166  |
| EZH1      | 1.186593462  | 0.238611234 | 1.114749958  | 0.269587508 | 2.256316278  | 0.027956761  |
| EZH2      | 0.005597625  | 0.995546553 | 0.516479941  | 0.607496662 | 1.330897467  | 0.188593693  |
| EZR       | -0.287838249 | 0.774153638 | 2.327727818  | 0.023461964 | 1.94785367   | 0.056430487  |
| F11R      | -4.1089707   | 8.95E-05    | 1.353356557  | 0.181229573 | 2.185581905  | 0.033026614  |
| F12       | -0.623922591 | 0.534307453 | -1.062227052 | 0.292566245 | -0.80489295  | 0.424271365  |
| F13A1     | -3.165215172 | 0.002134801 | 2.07054695   | 0.04289374  | 0.520903177  | 0.6044479342 |
| F2R       | -1.299522448 | 0.197190248 | -1.912919266 | 0.060734419 | -1.672724785 | 0.099936434  |
| F2RL1     | -3.374381387 | 0.00110586  | -0.135981722 | 0.892309892 | -2.337257299 | 0.023010888  |
| F2RL2     | 0.322949071  | 0.747507037 | 0.229075018  | 0.819622084 | 0.763677988  | 0.448251312  |
| F2RL3     | -2.539473964 | 0.012874952 | 1.671479703  | 0.100052124 | 0.513318778  | 0.609739169  |
| F5        | -1.323207671 | 0.189225903 | 0.481064969  | 0.632292847 | 0.189474747  | 0.850402957  |
| F8        | 0.389057666  | 0.698182047 | -1.312951845 | 0.194406389 | -1.34986774  | 0.182466951  |
| F8A1      | -1.906298442 | 0.059905639 | -0.79690624  | 0.428778325 | -1.290465903 | 0.202169574  |
| FA2H      | 0.311424121  | 0.756221633 | 0.289329578  | 0.773368103 | -0.923380803 | 0.359753791  |
| FAAH      | 0.662759168  | 0.509233099 | 1.813058823  | 0.075034579 | 1.64146996   | 0.106281335  |
| FAAH2     | 3.494061626  | 0.000749877 | 2.49382772   | 0.015531325 | 3.623882051  | 0.000625008  |
| FABP5     | 3.110128275  | 0.002526926 | -0.251826111 | 0.80207188  | -0.55317435  | 0.582336537  |
| FADD      | -1.464937777 | 0.146534631 | -2.423519969 | 0.018534091 | -1.901773933 | 0.062327658  |
| FADS1     | 2.16690897   | 0.032969054 | -1.182890196 | 0.241712505 | -0.62474644  | 0.534664162  |
| FADS2     | 1.75385554   | 0.082969241 | -0.947403773 | 0.347391137 | -2.134367724 | 0.037185603  |
| FADS3     | 0.541492095  | 0.589549468 | -0.30258324  | 0.763297568 | -0.579751416 | 0.564397783  |
| FAF1      | 1.05185491   | 0.295772649 | 2.169857868  | 0.034156191 | 3.151774066  | 0.002601512  |
| FAF2      | -0.847740179 | 0.398903882 | 0.263624947  | 0.793009829 | 0.61963238   | 0.538002355  |
| FAH       | -1.716273312 | 0.089663126 | 0.435200033  | 0.66504371  | 1.733079619  | 0.088562182  |
| FAHD1     | 0.175533029  | 0.861067844 | 0.579046254  | 0.564815766 | 0.645636472  | 0.521140558  |
| FAHD2A    | 2.12252301   | 0.036629364 | 1.997380597  | 0.050515263 | 1.847739043  | 0.069901839  |
| FAHD2B    | 1.105243431  | 0.272094699 | 0.529945885  | 0.59818652  | 0.224051684  | 0.823529083  |
| FAIM      | -0.326408955 | 0.74489718  | -0.614641903 | 0.541211853 | -0.00991161  | 0.992126887  |
| FAIM3     | 1.788441863  | 0.077178251 | -0.535811626 | 0.594151925 | 0.387380087  | 0.699937087  |
| FAM100A   | -1.691504536 | 0.094311981 | -2.290656384 | 0.02566266  | -2.585797233 | 0.012332668  |
| FAM100B   | -1.189092889 | 0.237631488 | -3.786147326 | 0.00036716  | -4.418075277 | 4.59E-05     |
| FAM101B   | -2.191896721 | 0.031051925 | 1.350622798  | 0.182099096 | 1.896205071  | 0.063074616  |
| FAM102A   | 1.795340607  | 0.07606418  | 1.407464294  | 0.164663791 | 2.400919655  | 0.019685618  |
| FAM102B   | 0.209490821  | 0.834553814 | -1.32749681  | 0.189582194 | -2.236196463 | 0.02932369   |
| FAM103A1  | -2.243825461 | 0.027376744 | 0.531327879  | 0.597234803 | -0.203759721 | 0.839276818  |
| FAM104A   | -3.568951423 | 0.000585498 | 0.05166636   | 0.958973315 | 0.073653051  | 0.941547811  |
| FAM104B   | 0.16145432   | 0.872109129 | -1.771931003 | 0.081695457 | 0.000207     | 0.99983557   |
| FAM105A   | 0.334095507  | 0.739109756 | 1.278566105  | 0.206177942 | 0.349184235  | 0.728255119  |
| FAM105B   | 0.544766308  | 0.587304965 | -0.091565867 | 0.927360695 | -0.444642285 | 0.658284872  |
| FAM106A   | 0.860515818  | 0.391864898 | -0.605515609 | 0.547215132 | 0.340197977  | 0.734974918  |
| FAM107B   | -0.054122565 | 0.956961336 | 1.444994638  | 0.153878228 | 1.791071709  | 0.078663818  |
| FAM108A1  | 0.729796505  | 0.46747079  | -4.510240146 | 3.24E-05    | -3.932088107 | 0.000233396  |
| FAM108B1  | -0.501856812 | 0.617033225 | -1.176750687 | 0.244135399 | -1.606355237 | 0.113796993  |
| FAM108C1  | -1.0042193   | 0.318051818 | -0.364569208 | 0.716768141 | -1.068964089 | 0.289652841  |
| FAM109A   | 1.922442145  | 0.057815208 | -0.136639185 | 0.891792497 | -0.137519259 | 0.891111562  |
| FAM109B   | 1.515389032  | 0.133291042 | 1.203044019  | 0.233881196 | 0.063771094  | 0.949378631  |
| FAM110A   | -0.981937511 | 0.328847573 | -0.152550815 | 0.879285669 | -0.823396999 | 0.413760477  |
| FAM110B   | -0.078035944 | 0.937978271 | 1.672472554  | 0.099855388 | 0.880965068  | 0.382086344  |
| FAM110C   | -0.772355993 | 0.4419922   | -1.020929948 | 0.311556795 | -0.989533165 | 0.326640924  |
| FAM111A   | 0.50536528   | 0.614577455 | -0.390531445 | 0.697584322 | -0.627040502 | 0.533170212  |
| FAM111B   | -0.417443367 | 0.677380293 | 0.580748317  | 0.563675631 | 1.258321333  | 0.213474801  |
| FAM113A   | 1.35170797   | 0.179965168 | -2.219126203 | 0.030432056 | -0.592412677 | 0.555948871  |
| FAM113B   | 1.585950304  | 0.116370945 | -0.259318536 | 0.796314101 | 0.854053165  | 0.396699004  |
| FAM114A1  | -0.639865173 | 0.523938097 | -1.003439227 | 0.319846114 | -0.858893999 | 0.394045268  |
| FAM114A2  | 1.281254497  | 0.203501533 | -0.147335644 | 0.883381644 | 0.948281792  | 0.347043314  |
| FAM115A   | 1.353939107  | 0.179254911 | 0.500039729  | 0.618952249 | 0.574582174  | 0.567865396  |
| FAM115C   | 0.423723069  | 0.672811296 | 1.122540026  | 0.266290588 | 1.998580177  | 0.05049664   |
| FAM116A   | 0.120209184  | 0.904594016 | -0.771599057 | 0.443506174 | -1.087032458 | 0.281659698  |
| FAM116B   | -1.272198809 | 0.206685044 | 1.279398467  | 0.205886851 | 1.820642787  | 0.073983251  |
| FAM117A   | -3.303060645 | 0.001388143 | -1.129206798 | 0.263491767 | -0.591009806 | 0.556881882  |
| FAM117B   | 1.787107869  | 0.077395229 | 0.447131232  | 0.656457271 | 0.163263162  | 0.870896534  |
| FAM118A   | 1.930621641  | 0.056779811 | 0.131948621  | 0.89548479  | 0.619807114  | 0.537888121  |
| FAM118B   | 0.974611914  | 0.332449087 | -0.481714191 | 0.631834329 | -0.383804723 | 0.702570464  |
| FAM120A   | -0.947966658 | 0.345766498 | -0.918898851 | 0.36198078  | -2.283370631 | 0.026207734  |
| FAM120AOS | -3.627955433 | 0.000480671 | -1.483303428 | 0.14344452  | -1.452540964 | 0.151908286  |
| FAM120B   | -1.045089571 | 0.298870407 | 1.658608489  | 0.102631403 | 1.511227864  | 0.136329594  |
| FAM120C   | 1.909710334  | 0.0594586   | -0.674697159 | 0.502567549 | 0.230634077  | 0.818436067  |
| FAM122A   | 0.077499756  | 0.938403559 | -2.700184238 | 0.009083339 | -2.463322383 | 0.016851062  |
| FAM122B   | 1.42741702   | 0.157031515 | -2.267288858 | 0.027142248 | -2.581092977 | 0.012483543  |
| FAM122C   | 0.088781754  | 0.929458971 | -3.89321434  | 0.000259596 | -3.69254149  | 0.000503599  |
| FAM123B   | 0.731172099  | 0.466634529 | -0.596195162 | 0.553380836 | 0.067759194  | 0.946217668  |

|          |              |             |              |             |              |             |
|----------|--------------|-------------|--------------|-------------|--------------|-------------|
| FAM124B  | -1.133251241 | 0.260215359 | 0.083628057  | 0.933642142 | -1.073578512 | 0.287596732 |
| FAM125A  | -1.01954004  | 0.310767352 | 1.696342735  | 0.095220011 | 1.442772883  | 0.154631441 |
| FAM125B  | 0.528898466  | 0.598219786 | 1.041066844  | 0.302194914 | 0.515697553  | 0.608087226 |
| FAM126A  | 0.782479725  | 0.436052721 | -1.070205109 | 0.288991408 | -1.867031928 | 0.067112886 |
| FAM126B  | -0.632348332 | 0.528814086 | -1.405881066 | 0.165131315 | -2.562083514 | 0.013110455 |
| FAM127A  | -0.782693257 | 0.43592795  | -2.823883898 | 0.006505607 | -3.252118467 | 0.001938785 |
| FAM127B  | 0.75771671   | 0.450663673 | -4.29690552  | 6.75E-05    | -4.056137473 | 0.00015533  |
| FAM127C  | -1.084928535 | 0.280944092 | -0.372415265 | 0.710950549 | 0.129924541  | 0.89708974  |
| FAM129A  | -0.439744223 | 0.661210458 | -0.15111118  | 0.880415539 | -0.802411326 | 0.425693101 |
| FAM129B  | -0.556504674 | 0.579291466 | 1.490367613  | 0.141583948 | 1.260145408  | 0.212820985 |
| FAM129C  | 1.118900429  | 0.266255781 | 0.725765353  | 0.470921479 | 1.167200407  | 0.248054773 |
| FAM131A  | -0.721310191 | 0.472648499 | -0.120644421 | 0.904392567 | -0.388804598 | 0.698888916 |
| FAM131B  | 1.310394493  | 0.193503967 | -2.446896881 | 0.017482282 | -1.466314784 | 0.148132298 |
| FAM132A  | -0.759440722 | 0.449637403 | -1.041512775 | 0.301989792 | 0.029803429  | 0.976329343 |
| FAM133B  | 1.966041561  | 0.052475551 | -0.057980183 | 0.953965101 | -0.375124455 | 0.708978994 |
| FAM134A  | -2.847346748 | 0.00549676  | 0.334978596  | 0.73885817  | 0.974063358  | 0.334196426 |
| FAM134B  | 1.845095668  | 0.068418506 | 1.212200519  | 0.230384795 | 1.341759751  | 0.185066755 |
| FAM134C  | -1.12413106  | 0.264042875 | 1.630439098  | 0.108465819 | 2.66529839   | 0.010015497 |
| FAM135A  | 1.17013926   | 0.245133511 | -1.41546866  | 0.162315759 | -2.010181363 | 0.049217584 |
| FAM136A  | 1.830994981  | 0.070517117 | -0.722680922 | 0.472800292 | 0.966297257  | 0.338032703 |
| FAM13A   | -1.370258836 | 0.174124052 | 2.606399809  | 0.011628373 | 1.473861538  | 0.146094855 |
| FAM13AOS | 0.237578934  | 0.812765079 | -2.11848379  | 0.038459426 | -1.16455418  | 0.249115978 |
| FAM13B   | -0.055031093 | 0.956239599 | -0.937767252 | 0.352279864 | -2.539068504 | 0.013907648 |
| FAM149B1 | 0.08324758   | 0.933845511 | -2.360120295 | 0.021678317 | -1.880979413 | 0.06515573  |
| FAM151B  | -0.243638312 | 0.808083298 | 2.063968015  | 0.04353568  | 0.781316594  | 0.437893234 |
| FAM153A  | 2.48571868   | 0.014836794 | 1.140325486  | 0.258870419 | 1.50181427   | 0.138739623 |
| FAM153B  | 3.733917794  | 0.000335578 | 0.426054479  | 0.671656166 | 0.359884882  | 0.720281249 |
| FAM154B  | 1.209329275  | 0.229805392 | 0.728723216  | 0.469123741 | 1.614365377  | 0.112045773 |
| FAM157A  | 0.604572477  | 0.547033211 | -0.305321171 | 0.761222254 | 0.135488576  | 0.892709405 |
| FAM157B  | -1.155373723 | 0.251093885 | -3.755388673 | 0.000405249 | -3.056192473 | 0.003425757 |
| FAM158A  | -2.138224535 | 0.035296135 | 0.409589754  | 0.683626249 | -1.015369841 | 0.314278201 |
| FAM159A  | 2.496213306  | 0.014433941 | 0.625051498  | 0.534405868 | 0.937554972  | 0.352482324 |
| FAM160A1 | 1.143545712  | 0.255942148 | 0.244586905  | 0.807645565 | -1.077516927 | 0.285849858 |
| FAM160A2 | -0.567469388 | 0.571853607 | 1.10625252   | 0.273216458 | 0.789624071  | 0.433064131 |
| FAM160B1 | -0.841860652 | 0.402169176 | -1.074061524 | 0.287274283 | -2.099760745 | 0.040248861 |
| FAM160B2 | 0.965433151  | 0.336998123 | 0.486580868  | 0.628401836 | 1.898989217  | 0.062700231 |
| FAM161A  | 1.493810815  | 0.138835331 | -1.139194424 | 0.259337881 | -0.912435397 | 0.365434603 |
| FAM161B  | -2.425097253 | 0.017367253 | -0.357334694 | 0.722147291 | -1.590708233 | 0.117281635 |
| FAM162A  | 1.181701693  | 0.240537135 | 0.302091073  | 0.763670809 | 0.784231443  | 0.436195232 |
| FAM164A  | 1.661423441  | 0.100220236 | -1.206232127 | 0.232659466 | -1.810177389 | 0.075612295 |
| FAM165B  | 1.621218507  | 0.10858185  | -0.435283241 | 0.664983671 | -0.138994265 | 0.889951237 |
| FAM167A  | -1.6206087   | 0.108712872 | 0.402461736  | 0.688834062 | 0.644186567  | 0.522073313 |
| FAM167B  | -0.428437908 | 0.669388912 | -1.730711609 | 0.088857909 | -0.391336188 | 0.697027597 |
| FAM168A  | 0.217319204  | 0.82846734  | -1.204525089 | 0.233313049 | -0.941448462 | 0.350501767 |
| FAM168B  | 1.046547257  | 0.298201097 | 0.673977787  | 0.503021433 | 1.174825966  | 0.245014905 |
| FAM169A  | 0.858747949  | 0.392834344 | -1.372501621 | 0.175228546 | -1.609315435 | 0.113147257 |
| FAM171A1 | 2.29480785   | 0.024145648 | 1.743194975  | 0.086635864 | 2.178667734  | 0.033563115 |
| FAM172A  | 0.059648918  | 0.952571764 | -1.647730282 | 0.104853395 | -2.659163374 | 0.010184745 |
| FAM173A  | -0.07890456  | 0.937289349 | -2.74481418  | 0.008061118 | -2.600678873 | 0.011866202 |
| FAM173B  | 2.006011533  | 0.047954743 | -1.882447042 | 0.06482998  | -1.727008039 | 0.089655697 |
| FAM174A  | -1.463083258 | 0.147040297 | -0.61943384  | 0.538073284 | -1.267598323 | 0.210165008 |
| FAM174B  | 0.240421505  | 0.810567906 | 3.037060159  | 0.003585591 | 1.594612849  | 0.116404108 |
| FAM175A  | 0.911269904  | 0.364665782 | -0.336947011 | 0.737381576 | -0.659341701 | 0.512367406 |
| FAM175B  | 0.706700441  | 0.48163705  | 2.056544512  | 0.044270012 | 2.356615763  | 0.021950276 |
| FAM176B  | -1.376917928 | 0.172062804 | -1.898497121 | 0.062644548 | -1.358045002 | 0.179873192 |
| FAM177A1 | -2.254736728 | 0.026654945 | -1.864608005 | 0.067334402 | -2.65533738  | 0.01028771  |
| FAM177B  | 1.684594363  | 0.095643461 | -0.928733417 | 0.356903228 | 0.479151557  | 0.633688805 |
| FAM178A  | 2.196665052  | 0.030697354 | -0.695459015 | 0.489564241 | -0.03475618  | 0.972397236 |
| FAM178B  | 0.623466769  | 0.534605471 | -2.019191126 | 0.048129917 | -0.174605973 | 0.862016346 |
| FAM179A  | -0.548229884 | 0.584935041 | -2.405968475 | 0.019360776 | -1.245343093 | 0.218169696 |
| FAM179B  | 0.847909816  | 0.398809913 | -1.548897511 | 0.126884031 | -2.750848694 | 0.007982535 |
| FAM182A  | 0.132232288  | 0.895105246 | -0.892973638 | 0.3755872   | 0.224882916  | 0.822885504 |
| FAM184A  | 1.573461718  | 0.119233868 | 0.900073297  | 0.3718292   | 0.335208591  | 0.738714966 |
| FAM184B  | 2.986607318  | 0.003661893 | 0.438803482  | 0.662445619 | 1.50073467   | 0.139018158 |
| FAM185A  | 0.249109778  | 0.803861761 | -1.374642034 | 0.174567199 | -1.701106696 | 0.094446694 |
| FAM186B  | 0.247431882  | 0.805155738 | -0.488046135 | 0.627369984 | 0.144922259  | 0.885290404 |
| FAM188A  | 0.210466286  | 0.833794843 | -0.782937082 | 0.436871486 | -0.73332015  | 0.466409223 |
| FAM189B  | -0.204059827 | 0.838782302 | -0.124602928 | 0.901271774 | 0.347251722  | 0.729698437 |
| FAM18A   | 1.421125475  | 0.158847077 | 0.555414379  | 0.580762219 | 1.110813647  | 0.271375417 |
| FAM18B1  | -0.618730478 | 0.537707113 | -1.801383304 | 0.076877578 | -2.323034849 | 0.023818987 |
| FAM18B2  | 2.051533708  | 0.043215523 | -0.270913107 | 0.787426398 | 0.571855262  | 0.569698862 |
| FAM190A  | -0.40805032  | 0.684237054 | 0.837697836  | 0.405663172 | -0.948988733 | 0.346686798 |

|         |              |             |              |             |              |             |
|---------|--------------|-------------|--------------|-------------|--------------|-------------|
| FAM190B | 1.174829519  | 0.243261506 | 0.145561527  | 0.884775763 | 0.322934857  | 0.747942256 |
| FAM192A | -0.894751635 | 0.373383283 | 1.680995166  | 0.098179606 | 3.042075636  | 0.003566422 |
| FAM193A | -2.12562242  | 0.036362785 | -0.171496772 | 0.86443428  | -0.030129006 | 0.97607084  |
| FAM193B | 0.548502644  | 0.584748599 | -1.516099433 | 0.134963684 | -0.144796536 | 0.88538921  |
| FAM195A | 0.598245186  | 0.551227275 | 0.501068498  | 0.618232566 | 0.515095565  | 0.608505084 |
| FAM195B | -0.327084943 | 0.744387616 | 1.137690005  | 0.25996058  | 1.506186876  | 0.137616007 |
| FAM196B | -1.42134457  | 0.158783582 | 2.468391232  | 0.016562892 | 2.264134584  | 0.027440996 |
| FAM198B | 2.677476338  | 0.008862912 | -0.562871804 | 0.575706741 | -0.841536462 | 0.403611806 |
| FAM199X | 0.763251617  | 0.447373643 | -1.05016881  | 0.298026972 | -1.468372553 | 0.147574551 |
| FAM19A1 | -0.155666418 | 0.876655807 | -0.403559947 | 0.688030701 | -0.702079999 | 0.485525027 |
| FAM19A2 | -0.885927786 | 0.378093397 | 0.31498033   | 0.753914905 | -0.772975435 | 0.442773772 |
| FAM200A | 1.047255074  | 0.297876464 | -0.965530432 | 0.338315876 | -1.084011302 | 0.282985402 |
| FAM200B | -0.768096239 | 0.444505363 | -0.78317805  | 0.436731119 | -1.258875828 | 0.213275892 |
| FAM201A | 0.967921842  | 0.335760712 | -1.347309445 | 0.183157222 | -1.335569933 | 0.187070373 |
| FAM202A | -1.084279103 | 0.281230234 | -0.6285144   | 0.532151625 | 0.30983127   | 0.757834482 |
| FAM203A | 0.153022677  | 0.878733982 | 3.072916921  | 0.003235718 | 2.789421846  | 0.007194305 |
| FAM204A | 0.640628769  | 0.523444086 | 0.768386635  | 0.445396679 | 1.343295713  | 0.184572104 |
| FAM20A  | 0.026526346  | 0.97889814  | -1.094114425 | 0.278459436 | -1.797633927 | 0.077604309 |
| FAM20B  | -0.486467638 | 0.627856212 | 1.605648199  | 0.113820687 | 2.327517761  | 0.023561587 |
| FAM20C  | 1.57347666   | 0.11923041  | 1.820924861  | 0.0738139   | 1.852225478  | 0.069244715 |
| FAM21A  | -0.922409702 | 0.358860415 | -0.692149892 | 0.491624245 | -0.859467826 | 0.393731343 |
| FAM21B  | -2.20180355  | 0.030319221 | -0.478296805 | 0.634249512 | 0.249556256  | 0.803839832 |
| FAM21C  | 0.37988968   | 0.704951102 | 2.015901302  | 0.048483377 | 1.830014825  | 0.0725495   |
| FAM22A  | -0.892033118 | 0.374830456 | 0.316790347  | 0.752548081 | 0.739237461  | 0.462837339 |
| FAM22D  | 1.11365856   | 0.268486435 | 0.169411816  | 0.866066335 | -0.566142045 | 0.573549577 |
| FAM22G  | -0.062674825 | 0.950168903 | 0.737911307  | 0.463564293 | 1.257499751  | 0.213769772 |
| FAM24B  | 0.143930242  | 0.885887706 | 1.057326235  | 0.29477727  | 3.259544464  | 0.001896669 |
| FAM26F  | -1.747160551 | 0.084130614 | -1.252273507 | 0.215531406 | -2.34829972  | 0.022400427 |
| FAM32A  | -0.678571952 | 0.499206278 | -1.578833529 | 0.119851099 | -0.424751549 | 0.672638526 |
| FAM35A  | 1.15605088   | 0.250818307 | 0.522721096  | 0.60317337  | 0.679557779  | 0.499572202 |
| FAM35B  | 2.377477415  | 0.019617912 | 1.559399737  | 0.124380082 | 2.940697999  | 0.004746372 |
| FAM36A  | 0.280119553  | 0.780049313 | -5.149855205 | 3.30E-06    | -5.772731778 | 3.51E-07    |
| FAM38A  | 1.100479797  | 0.274152168 | -1.755756972 | 0.084446499 | -1.455478311 | 0.151096784 |
| FAM3A   | 0.572165497  | 0.56868221  | 0.311989066  | 0.756175476 | 0.416998099  | 0.678267337 |
| FAM3B   | 0.120808845  | 0.904120417 | 0.561268756  | 0.576791665 | -0.1428361   | 0.886930172 |
| FAM3C   | 1.861401955  | 0.06605701  | -1.259608326 | 0.212891071 | -1.219065593 | 0.227908085 |
| FAM3D   | -0.949469449 | 0.345006314 | 0.770882658  | 0.443927366 | -1.337843673 | 0.18633247  |
| FAM40A  | 0.057033083  | 0.954649343 | 1.178280008  | 0.243530237 | 1.319489536  | 0.192352358 |
| FAM40B  | -1.453314875 | 0.149772251 | -1.390003342 | 0.169876841 | 0.208698095  | 0.835438004 |
| FAM41C  | 0.505384887  | 0.614563744 | 1.161491005  | 0.250233155 | 0.411116461  | 0.682549611 |
| FAM43A  | -0.020477405 | 0.983709327 | -2.944839242 | 0.004654165 | -3.12007732  | 0.002851644 |
| FAM45B  | -1.19376931  | 0.235806156 | 0.826186033  | 0.412107924 | 0.989801015  | 0.326511117 |
| FAM46A  | -2.572604396 | 0.011785336 | 0.73818114   | 0.463401596 | -1.359007109 | 0.179569879 |
| FAM46C  | -4.985923253 | 3.11E-06    | 1.080286592  | 0.284517416 | 0.942177664  | 0.35013164  |
| FAM48A  | -0.088299974 | 0.929840758 | -2.117605222 | 0.038536956 | -2.702143579 | 0.009091095 |
| FAM49A  | -4.054697172 | 0.000108856 | 1.304427889  | 0.197276213 | 0.58680318   | 0.559684284 |
| FAM49B  | -1.671563117 | 0.098196018 | -0.756956539 | 0.452161371 | -1.172999376 | 0.245740604 |
| FAM50A  | -0.578269179 | 0.564573068 | 2.421060001  | 0.018648015 | 3.050461427  | 0.003482227 |
| FAM50B  | -0.219599716 | 0.826696221 | 1.778579825  | 0.080586401 | 1.645608927  | 0.10542271  |
| FAM53A  | 0.622140655  | 0.535472973 | 0.488367477  | 0.627143792 | -0.212135028 | 0.832768694 |
| FAM53B  | -2.190540492 | 0.031153425 | 0.236089445  | 0.814200807 | 0.60314998   | 0.548833827 |
| FAM53C  | -2.188582448 | 0.031300475 | 0.101508244  | 0.919499567 | -0.057029092 | 0.954724168 |
| FAM54A  | 1.044349657  | 0.299210535 | -2.195797361 | 0.032148381 | -1.030512973 | 0.307181026 |
| FAM54B  | 0.779500733  | 0.437795585 | 0.629817273  | 0.531304774 | 2.071480658  | 0.042912991 |
| FAM55C  | 1.367244346  | 0.1750633   | 1.216879152  | 0.228613052 | 2.019606471  | 0.04819909  |
| FAM57A  | -0.470535326 | 0.63914759  | -1.247917994 | 0.217110686 | 0.095747474  | 0.924061515 |
| FAM58A  | 1.146975352  | 0.254529587 | -1.745769327 | 0.086183402 | -0.792290293 | 0.431520997 |
| FAM59B  | 0.449709999  | 0.654035601 | 1.712486247  | 0.092186464 | 2.095325119  | 0.040656954 |
| FAM60A  | 1.389018907  | 0.168364697 | -0.852021794 | 0.397730891 | -0.935132383 | 0.353718321 |
| FAM63A  | -3.757944059 | 0.000309046 | 0.086006674  | 0.931759401 | 0.576464768  | 0.566601309 |
| FAM63B  | 0.167901434  | 0.86704967  | -1.653996865 | 0.10356864  | -3.681983458 | 0.000520675 |
| FAM65A  | 0.158428746  | 0.874485338 | -0.086294019 | 0.931531986 | 0.009325467  | 0.992592465 |
| FAM65B  | 1.528069136  | 0.13011525  | 0.177647593  | 0.859623043 | -0.985360094 | 0.328667756 |
| FAM65C  | -1.485396697 | 0.141045598 | 1.3113721    | 0.194935867 | 1.04925732   | 0.298548075 |
| FAM66B  | 1.422093669  | 0.158566636 | -2.290366967 | 0.025680539 | -1.362128786 | 0.178588429 |
| FAM66C  | 1.672576596  | 0.097995532 | 0.196685707  | 0.844765878 | -1.226327735 | 0.225185477 |
| FAM69A  | 1.143502403  | 0.255960021 | -0.238893575 | 0.8120361   | 0.110415178  | 0.912473219 |
| FAM69B  | 1.494682458  | 0.138607923 | -0.061990952 | 0.950784659 | 0.41989783   | 0.676160025 |
| FAM70A  | 1.10829701   | 0.270781492 | -2.257444525 | 0.027787865 | -3.733750654 | 0.000441939 |
| FAM71F2 | -1.49194001  | 0.139324403 | -0.618326242 | 0.538797893 | -0.562340312 | 0.576118951 |
| FAM73A  | 1.527976441  | 0.130138247 | -1.382410115 | 0.172183068 | -1.918280162 | 0.060157659 |
| FAM73B  | 0.787851652  | 0.432920173 | 0.375679367  | 0.708535382 | 1.229108887  | 0.224149152 |

|          |              |             |              |             |              |             |
|----------|--------------|-------------|--------------|-------------|--------------|-------------|
| FAM76A   | 2.071336229  | 0.04128304  | -0.30205182  | 0.76370058  | 0.564332914  | 0.57477157  |
| FAM76B   | 1.223022778  | 0.224616518 | -1.573802641 | 0.121010625 | -2.05532046  | 0.044503066 |
| FAM78A   | 0.071577927  | 0.943101741 | -1.33511782  | 0.187090913 | -0.867113782 | 0.389564544 |
| FAM81A   | 1.577064033  | 0.118402357 | -0.663689557 | 0.509536992 | -0.205186686 | 0.838167168 |
| FAM82A1  | 0.720446108  | 0.473177493 | -2.095092525 | 0.04057064  | -1.841187357 | 0.070870894 |
| FAM82A2  | 0.494510378  | 0.622189509 | 0.764711016  | 0.447565545 | 1.632391452  | 0.108184605 |
| FAM82B   | 0.196467601  | 0.84470141  | -0.098985574 | 0.921493432 | 0.503696866  | 0.616441907 |
| FAM83A   | -1.943240945 | 0.055213212 | 2.597649683  | 0.011896244 | 1.264058896  | 0.211423258 |
| FAM83D   | 1.027845668  | 0.306865499 | 0.188139775  | 0.851428374 | -0.799142383 | 0.427570249 |
| FAM83G   | 0.969781654  | 0.334837933 | -0.534225446 | 0.595241677 | -0.21631958  | 0.829521415 |
| FAM83H   | 2.659368531  | 0.009315029 | -0.96290469  | 0.339620715 | -0.075651665 | 0.939964716 |
| FAM84B   | 2.216208148  | 0.029280834 | 0.455343928  | 0.650573754 | -0.242976745 | 0.808907477 |
| FAM86A   | 0.216278516  | 0.829275868 | -1.237066857 | 0.221082351 | -0.697330264 | 0.488469068 |
| FAM86B1  | 0.459984244  | 0.646672562 | -0.249044264 | 0.804212504 | 0.793344832  | 0.430911565 |
| FAM86C1  | -0.759491774 | 0.449607033 | -0.418536298 | 0.677111621 | 0.706516906  | 0.482783818 |
| FAM86C2P | -0.600526543 | 0.549713218 | 0.371703904  | 0.711477294 | 0.795668993  | 0.429570212 |
| FAM86DP  | -0.397219276 | 0.692176494 | -2.624407817 | 0.011094291 | -1.757716745 | 0.084237632 |
| FAM86EP  | -1.119194771 | 0.266130911 | 2.454612944  | 0.017147084 | 1.35098834   | 0.182109831 |
| FAM86FP  | -0.211772331 | 0.832778909 | -0.518514339 | 0.606085862 | 2.364081769  | 0.02155304  |
| FAM86HP  | 0.374882277  | 0.708658351 | -0.466570029 | 0.642567529 | -0.531649939 | 0.597062418 |
| FAM89A   | -0.110564975 | 0.912215432 | -0.076605635 | 0.939202761 | -1.105601073 | 0.273606714 |
| FAM89B   | -1.528665356 | 0.129967407 | -1.615824479 | 0.111597288 | -2.209875767 | 0.031200854 |
| FAM8A1   | 0.033280114  | 0.973527281 | -1.97556641  | 0.053001979 | -3.134377582 | 0.002736125 |
| FAM90A1  | -0.721519482 | 0.47252042  | 1.516213083  | 0.134934998 | 0.762669996  | 0.448847531 |
| FAM91A1  | 0.084802519  | 0.932612811 | -1.174266917 | 0.24512055  | -1.969907273 | 0.053781157 |
| FAM92A1  | 1.047934664  | 0.297565003 | -2.350899895 | 0.022173276 | -1.491034771 | 0.141540593 |
| FAM95B1  | 1.539172987  | 0.127383571 | 2.303946345  | 0.024853488 | 1.284881689  | 0.204100721 |
| FAM96A   | 0.884970704  | 0.37860651  | 0.003357479  | 0.997332726 | -0.170678672 | 0.86508903  |
| FAM96B   | -0.438517272 | 0.662096012 | -4.211611104 | 9.02E-05    | -3.357375553 | 0.001416532 |
| FAM98A   | 2.688144756  | 0.00860597  | 0.068308486  | 0.945776659 | 1.015528193  | 0.314203417 |
| FAM98B   | 1.193016874  | 0.236099169 | -2.77907384  | 0.007349326 | -1.87011347  | 0.066676249 |
| FAM98C   | -0.390324826 | 0.69724836  | -2.108539197 | 0.039344993 | -2.187375388 | 0.032888686 |
| FAN1     | 1.231039914  | 0.221618395 | 1.227232909  | 0.224727648 | 1.564805741  | 0.123238766 |
| FANCA    | -0.996912923 | 0.321565507 | -1.645247852 | 0.105365912 | -1.045310431 | 0.300351903 |
| FANCB    | 1.660886804  | 0.100328303 | -1.345367696 | 0.183779492 | -1.244362333 | 0.218527561 |
| FANCC    | 2.344086674  | 0.021347061 | -1.509267774 | 0.136696929 | -0.408488456 | 0.684466404 |
| FANCD2   | 0.960771807  | 0.339323821 | 1.617459312  | 0.111243397 | 1.937518948  | 0.057709915 |
| FANCE    | 0.682593259  | 0.496673503 | 0.765885852  | 0.446871642 | 1.313437763  | 0.194369104 |
| FANCF    | 0.060886949  | 0.951588595 | -0.443076143 | 0.659370421 | -0.94602632  | 0.34818237  |
| FANCG    | 2.161966481  | 0.033360235 | 1.21627633   | 0.228840773 | 1.783764202  | 0.079857853 |
| FANCI    | 2.068614783  | 0.041544127 | 2.967260736  | 0.004370061 | 2.713908387  | 0.008811091 |
| FANCL    | 1.425358176  | 0.157623869 | -0.148288702 | 0.882632873 | -1.275581791 | 0.207347371 |
| FANCM    | 1.286817852  | 0.201563836 | 0.045930932  | 0.963524183 | -0.854334398 | 0.39654453  |
| FAR1     | -0.298899324 | 0.765728127 | -0.082535957 | 0.934506696 | -1.032849639 | 0.306095674 |
| FAR2     | -3.551314094 | 0.000620818 | -0.874735927 | 0.385350659 | -2.404794351 | 0.019497883 |
| FARP1    | -0.113305362 | 0.910048952 | -0.389823043 | 0.698105213 | 0.60820929   | 0.545497357 |
| FARP2    | 1.237621262  | 0.219179089 | 1.999377823  | 0.050292683 | 1.701993065  | 0.094279326 |
| FARS2    | 2.686906474  | 0.008635441 | -0.123531663 | 0.902116182 | 1.685102248  | 0.097511009 |
| FARSA    | -0.464871906 | 0.643182076 | 0.932570186  | 0.354934862 | 0.516098266  | 0.607809152 |
| FARSB    | 0.895677045  | 0.372891454 | -1.932633398 | 0.058203685 | 0.821699525  | 0.414718054 |
| FAS      | -1.104277598 | 0.272510983 | -0.846325797 | 0.400873649 | -2.062058086 | 0.043834019 |
| FAS-AS1  | -1.826699182 | 0.071167039 | -1.917443552 | 0.060145502 | -2.705179209 | 0.009018076 |
| FASLG    | 0.161874813  | 0.871778977 | -2.14952782  | 0.035805863 | -1.554888203 | 0.125582903 |
| FASN     | 1.330839519  | 0.186711706 | -0.193974738 | 0.846878168 | 0.458935598  | 0.648049341 |
| FASTK    | 0.195899963  | 0.845144319 | 0.761053968  | 0.449729555 | 1.536132935  | 0.130113373 |
| FASTKD1  | 0.638340046  | 0.52492551  | 0.541266808  | 0.590411221 | 0.082221723  | 0.934762351 |
| FASTKD2  | 1.434858193  | 0.154904907 | 0.97841864   | 0.331959165 | 2.878395761  | 0.005641951 |
| FASTKD3  | 0.130929064  | 0.896133052 | -0.889958871 | 0.377190236 | -0.57154506  | 0.569907613 |
| FASTKDS  | 0.562647627  | 0.575118733 | 0.796582315  | 0.428964974 | 0.659331883  | 0.512373662 |
| FAT1     | -0.720083151 | 0.473399795 | 4.718127259  | 1.56E-05    | 3.063606535  | 0.003353975 |
| FAT2     | 0.224755432  | 0.822695443 | 1.927497902  | 0.058854123 | 0.542599626  | 0.589549459 |
| FAT4     | -1.392157732 | 0.167415444 | 1.673708052  | 0.099611014 | 1.473426401  | 0.14621173  |
| FAU      | 0.067695808  | 0.946182788 | -0.836900157 | 0.406107742 | -0.080022043 | 0.936503815 |
| FBF1     | 2.02062165   | 0.046387467 | -0.244655443 | 0.807592748 | 0.705126164  | 0.483642115 |
| FBL      | 0.24622714   | 0.806085158 | 0.731010465  | 0.467736265 | 1.603670234  | 0.114388931 |
| FBLIM1   | -0.094436703 | 0.924978953 | 3.498050641  | 0.000910524 | 1.640905162  | 0.106398942 |
| FBLN2    | 1.334174677  | 0.185620905 | -0.460797713 | 0.646678982 | 0.821306014  | 0.414940233 |
| FBLN5    | 0.666192069  | 0.507047228 | 0.04612727   | 0.963368374 | 0.126882515  | 0.899485972 |
| FBLN7    | 0.338447499  | 0.735839646 | 1.544221565  | 0.128011752 | 2.07235562   | 0.042828324 |
| FBN1     | 0.604770139  | 0.546902449 | 2.076547056  | 0.042315454 | 1.155374839  | 0.252822379 |
| FBN2     | -0.967315259 | 0.336062038 | 2.291015874  | 0.025640469 | 1.233639476  | 0.222468448 |
| FBP1     | -2.486243521 | 0.014816411 | 2.040431229  | 0.045900928 | 2.521086959  | 0.014560792 |

|            |              |             |              |             |              |             |
|------------|--------------|-------------|--------------|-------------|--------------|-------------|
| FBRS       | -2.255120017 | 0.026629896 | -1.908363808 | 0.061332341 | -1.594667652 | 0.116391829 |
| FBRS1      | 1.220741977  | 0.22547482  | -2.135445024 | 0.036989102 | -1.823852963 | 0.073489497 |
| FBXL12     | 1.621198955  | 0.108586049 | 0.088995128  | 0.929394516 | -0.247076999 | 0.805748415 |
| FBXL13     | -1.193779955 | 0.235802013 | -2.063384175 | 0.043593048 | -3.115932033 | 0.002885975 |
| FBXL14     | 1.692178044  | 0.094183019 | -3.03354034  | 0.003621775 | -3.09911332  | 0.00302928  |
| FBXL15     | 0.548983145  | 0.584420227 | -1.691918831 | 0.09606549  | -1.047868876 | 0.299181781 |
| FBXL16     | 1.667374696  | 0.099028103 | 1.516640551  | 0.134827147 | 1.431843667  | 0.15772327  |
| FBXL17     | 0.506724806  | 0.613627027 | -1.875373306 | 0.065813466 | -2.567461091 | 0.012930269 |
| FBXL18     | 0.735589839  | 0.463954584 | 0.611377022  | 0.54335561  | 1.129208026  | 0.263603918 |
| FBXL19     | 0.187945603  | 0.851356018 | -2.090562913 | 0.040990922 | -1.806859535 | 0.076134987 |
| FBXL19-AS1 | 0.938824376  | 0.350414472 | -2.421750461 | 0.018615975 | -2.487350422 | 0.015861581 |
| FBXL2      | 0.84705171   | 0.399285393 | -0.594267746 | 0.554660214 | 1.844021572  | 0.070450308 |
| FBXL20     | -1.382343159 | 0.170397256 | 0.423189839  | 0.673732777 | 0.850344358  | 0.398739639 |
| FBXL3      | 0.260204433  | 0.795319591 | -0.547050064 | 0.586457744 | -1.941652534 | 0.05719524  |
| FBXL4      | 0.706697749  | 0.481638715 | 0.334346846  | 0.739332282 | -0.418623776 | 0.677085594 |
| FBXL5      | -0.818386868 | 0.415367427 | -0.600005335 | 0.550856096 | -1.319964736 | 0.192194669 |
| FBXL6      | 0.477371723  | 0.634291942 | -0.449865045 | 0.654496335 | 0.519076783  | 0.605744046 |
| FBXL8      | 1.377700178  | 0.171821891 | -1.563190825 | 0.123485982 | -1.096762868 | 0.277419365 |
| FBXO10     | 1.93322879   | 0.056453103 | -0.248962744 | 0.804275256 | 0.749991673  | 0.456386013 |
| FBXO11     | 0.433673442  | 0.665596739 | -0.494383075 | 0.622916089 | -1.72686108  | 0.089682303 |
| FBXO15     | 0.686204054  | 0.494405236 | -0.841544628 | 0.403523435 | 0.391472068  | 0.696927746 |
| FBXO18     | 1.045915654  | 0.298490978 | 3.045371005  | 0.003501487 | 2.469207758  | 0.016603686 |
| FBXO2      | 1.039451862  | 0.301468609 | 0.304359487  | 0.761950997 | 0.392956229  | 0.695837464 |
| FBXO21     | 1.728204758  | 0.087491626 | 4.038057573  | 0.000161224 | 3.005762463  | 0.003953428 |
| FBXO22     | 1.388729237  | 0.168452507 | -2.18084765  | 0.033292487 | -2.371843992 | 0.021146869 |
| FBXO24     | -1.2031385   | 0.232179521 | -0.129830824 | 0.897152633 | 0.693787059  | 0.490671684 |
| FBXO25     | 1.096507783  | 0.275875975 | 1.389404319  | 0.170057909 | 2.105513138  | 0.039724936 |
| FBXO27     | -0.858696062 | 0.392862819 | 1.753529869  | 0.084831264 | 0.781091819  | 0.438024335 |
| FBXO28     | 0.127205229  | 0.899070882 | -0.589036601 | 0.558140004 | -0.986953439 | 0.327892893 |
| FBXO3      | 1.122586135  | 0.264695135 | -1.060103802 | 0.293522752 | -1.701084881 | 0.094450816 |
| FBXO30     | -0.049169576 | 0.960896619 | -0.768501257 | 0.445329143 | -1.793929352 | 0.078200958 |
| FBXO31     | 0.554192662  | 0.580865685 | 3.467158704  | 0.001001411 | 3.26221889   | 0.001881713 |
| FBXO32     | 3.26426356   | 0.001568805 | 0.512219369  | 0.610456117 | 0.896938066  | 0.373575705 |
| FBXO33     | -0.506302433 | 0.613922232 | -0.375295255 | 0.708819437 | -1.932045692 | 0.058397471 |
| FBXO34     | -0.378370718 | 0.706074923 | -0.202304898 | 0.84039127  | -1.441913919 | 0.154872714 |
| FBXO36     | 0.405355075  | 0.686209466 | 0.194248379  | 0.846664905 | -0.422851851 | 0.674015933 |
| FBXO38     | 0.292952157  | 0.770254808 | 1.660667707  | 0.102215143 | 1.105354966  | 0.273712381 |
| FBXO39     | -1.484954561 | 0.141162497 | 0.710615478  | 0.480190222 | 0.210929555  | 0.833704706 |
| FBXO4      | 1.666848835  | 0.099132976 | -0.557917473 | 0.579062965 | -0.220759976 | 0.826078867 |
| FBXO40     | -0.74380861  | 0.45899208  | 0.570702721  | 0.570421133 | 0.230603428  | 0.818459763 |
| FBXO41     | 2.473152261  | 0.015332417 | -0.027929281 | 0.977815103 | 0.205462349  | 0.837952842 |
| FBXO42     | -1.429021868 | 0.156570972 | 2.279574378  | 0.026355189 | 1.814589504  | 0.074921876 |
| FBXO44     | 1.240518752  | 0.218111405 | -0.551772645 | 0.583238723 | 0.149224635  | 0.881910239 |
| FBXO45     | -0.68803408  | 0.493257786 | 0.837031833  | 0.406034334 | 0.185576412  | 0.853444674 |
| FBXO46     | 0.359315353  | 0.72022794  | -1.178190658 | 0.243565564 | 0.279076307  | 0.781210017 |
| FBXO48     | -0.164008774 | 0.870103838 | -1.303846049 | 0.197473259 | -0.827481017 | 0.411462118 |
| FBXO5      | 1.841062177  | 0.069013411 | -1.293584904 | 0.200972638 | -1.236972692 | 0.221237859 |
| FBXO6      | -1.927464924 | 0.057177528 | -1.015426612 | 0.314149157 | -2.806886943 | 0.006861555 |
| FBXO7      | -3.574872295 | 0.000574074 | 0.115514431  | 0.908439176 | -0.644545214 | 0.521842506 |
| FBXO8      | 0.410776679  | 0.682244099 | -1.154077784 | 0.253234555 | -1.14764805  | 0.255972722 |
| FBXO9      | -1.124452182 | 0.263907441 | 1.405005604  | 0.165390278 | -0.034359604 | 0.972712063 |
| FBXW11     | -1.267776579 | 0.208252972 | -0.666201374 | 0.507942079 | -0.632779272 | 0.529442496 |
| FBXW2      | -0.644098754 | 0.521202235 | 1.511235834  | 0.136195818 | 1.997763689  | 0.050587727 |
| FBXW4      | 0.096426413  | 0.923403214 | 0.814258995  | 0.418850453 | 2.330934733  | 0.023367059 |
| FBXW4P1    | -0.558082211 | 0.578218511 | -0.143477842 | 0.886413612 | -0.216237267 | 0.829585263 |
| FBXW5      | 0.112874161  | 0.910389804 | -1.008935426 | 0.317225513 | -0.832119144 | 0.408861379 |
| FBXW7      | -0.299254246 | 0.765458233 | -1.177206894 | 0.243954762 | -1.818012626 | 0.074389866 |
| FBXW8      | 2.068164863  | 0.041587428 | -1.742302433 | 0.086793194 | -1.101473358 | 0.275382739 |
| FBXW9      | 0.84268569   | 0.401709996 | -0.89306273  | 0.375539893 | 0.262745835  | 0.793706674 |
| FCAR       | -1.448095918 | 0.151176793 | 0.282588133  | 0.778505643 | 0.019409473  | 0.984583154 |
| FCER1A     | -0.932876695 | 0.35345984  | 0.042820773  | 0.965992509 | -1.96804773  | 0.054000355 |
| FCER1G     | -1.22223377  | 0.224913166 | -0.858353118 | 0.394255532 | -0.897690617 | 0.373177728 |
| FCER2      | 0.179072205  | 0.858296481 | 2.437112295  | 0.017915813 | 3.04419164   | 0.003545    |
| FCF1       | -0.900293217 | 0.370444196 | -1.071278891 | 0.28851258  | 0.061483034  | 0.951192517 |
| FCGBP      | 1.936421455  | 0.056055192 | 0.210509471  | 0.834013021 | 0.444416867  | 0.65844683  |
| FCGR1A     | 0.214282808  | 0.83082688  | -0.29729982  | 0.767307255 | -1.243673396 | 0.218779202 |
| FCGR1B     | -0.457571067 | 0.648398841 | -0.55630708  | 0.580155924 | -2.208068495 | 0.031333549 |
| FCGR1C     | -0.323536729 | 0.747063547 | -0.752504889 | 0.45481204  | -1.569595668 | 0.122119237 |
| FCGR2A     | -2.160321082 | 0.033491355 | -1.10850894  | 0.272249495 | -2.267605036 | 0.027214768 |
| FCGR2B     | -1.832971486 | 0.070219754 | 0.289825941  | 0.772990233 | -0.111260313 | 0.911806073 |
| FCGR2C     | 0.151176458  | 0.88018575  | -1.344273831 | 0.184130749 | -1.777658107 | 0.080867143 |
| FCGR3A     | -2.312129773 | 0.023127043 | -1.538013806 | 0.129521248 | -2.880573016 | 0.005608178 |

|          |              |             |              |             |              |             |
|----------|--------------|-------------|--------------|-------------|--------------|-------------|
| FCGR3B   | -3.966019992 | 0.000149428 | -0.785998481 | 0.43509015  | -2.621858978 | 0.011230077 |
| FCGRT    | -2.491918189 | 0.014597615 | -0.305850218 | 0.760821445 | -0.464572104 | 0.644031567 |
| FCHO1    | -1.251253399 | 0.214188984 | -0.937012133 | 0.352664825 | -0.434910409 | 0.665291907 |
| FCH02    | -0.207755678 | 0.835904247 | -2.162764506 | 0.034724049 | -3.145534153 | 0.002649065 |
| FCHSD1   | 0.497503158  | 0.620086653 | -0.371575702 | 0.711572239 | -0.019683944 | 0.984365172 |
| FCHSD2   | 0.734182006  | 0.464807673 | 0.602189637  | 0.549411336 | -0.198540052 | 0.843338565 |
| FCN1     | -2.108892934 | 0.037821874 | 1.526430221  | 0.132375841 | 0.452830417  | 0.652413094 |
| FCRL1    | 1.9854668    | 0.050235077 | 0.18763459   | 0.851822567 | -0.111172439 | 0.911875438 |
| FCRL2    | 2.057720314  | 0.042603599 | 0.507240567  | 0.613922758 | 0.579012836  | 0.564892593 |
| FCRL3    | 4.10159275   | 9.19E-05    | -0.474926417 | 0.636635401 | 0.045634721  | 0.963763059 |
| FCRL5    | 0.220182734  | 0.826243574 | 1.46483248   | 0.148404115 | 0.863185898  | 0.391701708 |
| FCRL6    | 1.67954186   | 0.096626656 | -2.562820515 | 0.013019024 | -1.519735174 | 0.134180241 |
| FCRLA    | -0.380813772 | 0.704267723 | 1.133047128  | 0.26188902  | 1.305519664  | 0.19703181  |
| FCRLB    | -1.822571371 | 0.071796244 | -2.303043432 | 0.024907736 | -2.544337857 | 0.013721345 |
| FDFT1    | -0.833758953 | 0.406695218 | -0.072033905 | 0.942824483 | 0.492650821  | 0.624177365 |
| FDP5     | -1.089231413 | 0.279053309 | 1.220218342  | 0.227354643 | 2.704294392  | 0.009039304 |
| FDP5L2A  | 0.323392273  | 0.747172556 | 0.910514016  | 0.366346343 | 1.552358856  | 0.126186421 |
| FDX1     | 1.91144416   | 0.059232508 | -0.209119323 | 0.835092949 | 0.326982372  | 0.744895193 |
| FDX1L    | 0.533880027  | 0.594783099 | 1.156214344  | 0.252366896 | 2.323464976  | 0.023794182 |
| FDXACB1  | -2.051797889 | 0.043189239 | -1.500703836 | 0.138894507 | -1.168875981 | 0.247384506 |
| FDXR     | 0.101692346  | 0.919234381 | 1.58371878   | 0.118733702 | 2.157971803  | 0.035215007 |
| FECH     | -3.937058501 | 0.000165566 | 0.262281093  | 0.79404055  | -0.187504797 | 0.851939749 |
| FEM1A    | -0.47592508  | 0.635318115 | -0.290601721 | 0.772399759 | -0.498277964 | 0.620231331 |
| FEM1B    | 0.267526599  | 0.789695565 | -1.450419592 | 0.15236583  | -3.240405722 | 0.00200701  |
| FEM1C    | 0.329624964  | 0.742473951 | -1.301132859 | 0.198394063 | -1.935229359 | 0.05799669  |
| FEN1     | 1.012984479  | 0.313870469 | 2.998264121  | 0.004003724 | 4.188940741  | 9.98E-05    |
| FER      | 1.092919004  | 0.277439917 | -0.570512821 | 0.570549027 | -0.29935011  | 0.76577648  |
| FER1L4   | 1.030168688  | 0.305780114 | 0.992582519  | 0.325065205 | 1.468606472  | 0.147511253 |
| FERMT3   | -1.651538748 | 0.102225998 | 0.782176756  | 0.437314565 | 0.330489583  | 0.742258191 |
| FES      | -1.904185895 | 0.060183852 | 1.311341356  | 0.194946182 | 1.200256256  | 0.235071577 |
| FEZ1     | 3.619086947  | 0.000495202 | -1.458479594 | 0.15014029  | 0.327512919  | 0.744496087 |
| FEZ2     | 0.111497376  | 0.911478224 | 0.543280992  | 0.589032881 | -0.97517972  | 0.333647347 |
| FFAR2    | -0.975891028 | 0.33181837  | 0.171097816  | 0.864746528 | -0.852241976 | 0.397694735 |
| FFAR3    | -1.575911609 | 0.118667863 | 0.312027091  | 0.756146726 | -0.617899759 | 0.539135752 |
| FGD1     | 2.110921093  | 0.037642328 | 1.039279281  | 0.303018123 | 2.165619395  | 0.034596475 |
| FGD2     | 0.309772118  | 0.757473415 | 0.39795829   | 0.69213217  | 0.280356724  | 0.780232598 |
| FGD3     | -1.756990641 | 0.082429958 | 1.284223958  | 0.204205332 | 1.384985534  | 0.171526775 |
| FGD4     | -1.708525182 | 0.091096768 | -0.662136126 | 0.51052471  | -2.032556977 | 0.046829321 |
| FGD6     | 1.621082031  | 0.108611162 | -1.545303152 | 0.127750192 | -0.91677221  | 0.363176894 |
| FGF11    | 0.667289598  | 0.946505225 | -1.592699409 | 0.116701451 | -2.19810287  | 0.032074217 |
| FGF13    | -1.307050948 | 0.194632108 | -0.274355323 | 0.784793204 | -1.572581033 | 0.121425619 |
| FGF5     | -1.134645454 | 0.259633701 | 2.596973     | 0.011917191 | 1.417207645  | 0.161938798 |
| FGF7     | -0.097859327 | 0.922268615 | 0.109797279  | 0.912951818 | -1.005827986 | 0.318806648 |
| FGF9     | 0.566206687  | 0.572707797 | 0.215033596  | 0.830500719 | 0.060328721  | 0.952107712 |
| FGFBP2   | 0.76593998   | 0.445780666 | -2.022668251 | 0.047758751 | -1.668882659 | 0.100699288 |
| FGFBP3   | -0.304422394 | 0.761531519 | -2.496530972 | 0.015425178 | -2.772446505 | 0.007531915 |
| FGFR1    | -0.400587156 | 0.689704011 | -0.757958964 | 0.45156573  | -0.718450545 | 0.475453998 |
| FGFR1OP  | 1.878542425  | 0.063648751 | -0.523673805 | 0.602514673 | -1.98023048  | 0.052578105 |
| FGFR1OP2 | -0.032259029 | 0.974339215 | -0.69821419  | 0.487852727 | -1.318681198 | 0.192620818 |
| FGFR2    | 2.146484059  | 0.034611872 | -0.0670728   | 0.946756038 | -0.545237232 | 0.587746416 |
| FGFR4    | 1.530728776  | 0.129456771 | -0.721617931 | 0.47344877  | -0.741975946 | 0.461189615 |
| FGFRL1   | 3.325459837  | 0.001292922 | -1.440198348 | 0.155225093 | -1.495035516 | 0.140495867 |
| FGGY     | 0.735976816  | 0.463720246 | 0.769601727  | 0.444681046 | -1.187624583 | 0.239973337 |
| FGL2     | -1.723400049 | 0.088360827 | -0.863935518 | 0.391206963 | -1.892654179 | 0.063554856 |
| FGR      | -2.463478882 | 0.015723982 | -1.174322779 | 0.245098361 | -1.551368633 | 0.126423325 |
| FH       | 0.602969212  | 0.548094418 | 3.043984782  | 0.003515386 | 4.340011619  | 5.99E-05    |
| FHAD1    | 0.594326433  | 0.553832875 | 0.238764644  | 0.812135599 | -0.215497364 | 0.830159234 |
| FHDC1    | -0.99286955  | 0.323521035 | -0.384256041 | 0.702203719 | -2.053636994 | 0.04467161  |
| FHIT     | 1.068156732  | 0.288398352 | 1.318410911  | 0.192585028 | 0.699936719  | 0.486852279 |
| FHL1     | -0.246080975 | 0.806197938 | 1.346148034  | 0.183529225 | 1.197964746  | 0.235955359 |
| FHL2     | -2.534269166 | 0.01305414  | -0.20817654  | 0.835825525 | -0.878268431 | 0.383535108 |
| FHL3     | -1.980706747 | 0.050776412 | -0.191565822 | 0.848756057 | 0.149098093  | 0.882009625 |
| FHOD1    | 0.308557239  | 0.758394386 | -0.161707584 | 0.872102061 | 0.079700028  | 0.936758777 |
| FHOD3    | 0.132142354  | 0.895176167 | -2.148701894 | 0.035874332 | -1.126109587 | 0.26490183  |
| FIBCD1   | 0.393682625  | 0.694776477 | -1.768748792 | 0.082230745 | -1.737001775 | 0.087861672 |
| FIBP     | -1.345356049 | 0.181998878 | 2.432890478  | 0.018105838 | 2.751459936  | 0.007969449 |
| FICD     | -0.696545869 | 0.487939907 | -0.313395737 | 0.755112152 | -0.667945285 | 0.506900643 |
| FIG4     | -0.553523704 | 0.58132155  | 1.275478561  | 0.207260386 | 1.349003239  | 0.182742819 |
| FIGNL1   | 0.487456529  | 0.627158251 | -0.338089851 | 0.736524738 | -0.177737861 | 0.859567519 |
| FIGNL2   | 1.066696254  | 0.289053827 | -3.257947424 | 0.001884396 | -3.268077191 | 0.001849341 |
| FILIP1L  | 0.359577751  | 0.720032372 | 1.772434288  | 0.081611065 | 1.885829562  | 0.064486565 |
| FIP1L1   | -0.470771927 | 0.638979276 | 0.561696843  | 0.576501844 | 1.054618115  | 0.296109974 |

|          |              |             |              |             |              |             |
|----------|--------------|-------------|--------------|-------------|--------------|-------------|
| FIS1     | -1.385080709 | 0.169561506 | -1.207767342 | 0.232072809 | -1.231102209 | 0.223408548 |
| FITM1    | 0.612479887  | 0.541814445 | -0.743117675 | 0.460430862 | -0.584771663 | 0.561040167 |
| FITM2    | 1.909531312  | 0.059481986 | -1.877805701 | 0.065473868 | -1.508340103 | 0.137065353 |
| FIZ1     | -0.121311326 | 0.903723595 | -0.660774524 | 0.5113913   | 0.629702823  | 0.531439163 |
| FKBP10   | 1.096712771  | 0.275786829 | -0.924527771 | 0.359068928 | 0.657831176  | 0.513330449 |
| FKBP11   | 2.12529356   | 0.03639099  | -0.287311759 | 0.774904792 | 1.357906235  | 0.179916972 |
| FKBP14   | 0.267803952  | 0.789482752 | -0.724357707 | 0.471778391 | -0.830441535 | 0.409800903 |
| FKBP15   | -1.428117757 | 0.156830296 | 1.439085304  | 0.155538961 | 1.098213346  | 0.276791118 |
| FKBP1A   | -2.052086377 | 0.043160553 | -2.50430451  | 0.01512358  | -2.153238382 | 0.03560268  |
| FKBP1AP1 | 0.217240039  | 0.828528839 | 0.460282297  | 0.647046639 | 0.578072063  | 0.565523173 |
| FKBP1B   | -2.150555918 | 0.034278799 | 0.708684678  | 0.481378782 | -0.394752952 | 0.694518434 |
| FKBP2    | -0.743574966 | 0.459132736 | 0.680530487  | 0.49889526  | 0.515847346  | 0.607983271 |
| FKBP3    | 1.174296933  | 0.243473559 | -0.702934798 | 0.484928002 | 0.113686504  | 0.909891204 |
| FKBP4    | -0.687406405 | 0.493651182 | 2.084086085  | 0.041598451 | 2.182711352  | 0.033248431 |
| FKBP5    | 1.279530692  | 0.204104718 | 0.730016002  | 0.468339232 | 0.143920129  | 0.886078038 |
| FKBP7    | 1.240471454  | 0.218128803 | -0.721508112 | 0.473515793 | -1.131559179 | 0.262622005 |
| FKBP8    | -2.973266941 | 0.003809311 | 0.31382186   | 0.754790134 | -0.329883292 | 0.742713828 |
| FKBP9    | -0.634278021 | 0.527560106 | 0.332921986  | 0.740401979 | 1.255222969  | 0.214588779 |
| FKBPL    | -1.690988141 | 0.094410957 | 2.919741806  | 0.004992478 | 2.255700833  | 0.027997723 |
| FKRP     | -0.002565866 | 0.997958599 | -2.595054889 | 0.011976752 | -1.64132841  | 0.1063108   |
| FKTN     | 1.741323877  | 0.085153987 | -1.874447457 | 0.06594312  | -2.214138489 | 0.030889833 |
| FLAD1    | -0.810039788 | 0.420122667 | -1.186119539 | 0.240445069 | -0.648175075 | 0.519509545 |
| FLCN     | -0.889001872 | 0.37644826  | 1.09122783   | 0.279716558 | 1.049965711  | 0.298225111 |
| FLI1     | -1.808134886 | 0.074033372 | -1.237087576 | 0.221074717 | -2.873438866 | 0.005719544 |
| FLII     | -1.139098363 | 0.257782109 | 1.208900255  | 0.231640577 | 1.207317264  | 0.232363447 |
| FLJ10038 | 1.652819647  | 0.101964264 | -0.893574421 | 0.375268264 | -0.49781783  | 0.620553582 |
| FLJ10661 | -1.579150376 | 0.117922893 | -1.050512654 | 0.297870296 | -1.32965433  | 0.189000056 |
| FLJ12334 | 0.582653991  | 0.561630108 | -1.497023138 | 0.139847543 | -1.47012533  | 0.147100773 |
| FLJ12825 | 0.247174539  | 0.805354247 | 2.011069925  | 0.049006515 | 1.105788154  | 0.27352641  |
| FLJ13197 | 4.079285238  | 9.96E-05    | -1.712695855 | 0.092147607 | -0.74019068  | 0.462263413 |
| FLJ14107 | 1.50974675   | 0.134723656 | -1.070795279 | 0.288728167 | 0.054248445  | 0.956929485 |
| FLJ14186 | -1.062645277 | 0.29087728  | 0.679911585  | 0.499284185 | 0.722123429  | 0.473210736 |
| FLJ20021 | -0.688284309 | 0.493101002 | 0.706592611  | 0.482668468 | -0.307792519 | 0.759377301 |
| FLJ22184 | -1.346592328 | 0.181601703 | -2.152202957 | 0.03558488  | -1.516608788 | 0.134966967 |
| FLJ22447 | -0.083813626 | 0.933396752 | -1.546755913 | 0.127399542 | 0.999891606  | 0.321646011 |
| FLJ23867 | -1.667338602 | 0.099035299 | 1.886815235  | 0.064228891 | 1.670600499  | 0.100357624 |
| FLJ27354 | 2.271924881  | 0.025551817 | -1.859975132 | 0.067998019 | -3.094748887 | 0.003067542 |
| FLJ30403 | -3.18492082  | 0.002008886 | 0.543433716  | 0.588928432 | 2.079541756  | 0.042138421 |
| FLJ31306 | 0.772151737  | 0.442112517 | -0.257068437 | 0.798042077 | -0.52759087  | 0.599858806 |
| FLJ31813 | 0.560888586  | 0.576312122 | -0.646577427 | 0.520473786 | -0.904843146 | 0.369408678 |
| FLJ32224 | 1.444804756  | 0.152097117 | 0.708648942  | 0.481400796 | 0.035785022  | 0.971580497 |
| FLJ33065 | -1.485871879 | 0.140920046 | -0.208975755 | 0.835204497 | 0.983078647  | 0.329779371 |
| FLJ33360 | 0.191091353  | 0.848898303 | 1.185144927  | 0.240827072 | 0.974282863  | 0.334088416 |
| FLJ33630 | 1.266531386  | 0.208696041 | -2.417326293 | 0.018822127 | -2.813669059 | 0.006736211 |
| FLJ35390 | 0.290118878  | 0.77241417  | -1.551954252 | 0.12615112  | -1.598790384 | 0.115471118 |
| FLJ35776 | 0.647201094  | 0.519202174 | -1.94464546  | 0.056706189 | -0.502044064 | 0.617596602 |
| FLJ36644 | -0.064575773 | 0.948659603 | -1.352401677 | 0.18153293  | -2.773771531 | 0.007505047 |
| FLJ37453 | 0.845158864  | 0.400335455 | -0.897131322 | 0.373383538 | -1.282826605 | 0.204814874 |
| FLJ38109 | 0.432089837  | 0.666742856 | -1.758588502 | 0.083959402 | -1.074911679 | 0.287004583 |
| FLJ39051 | -0.231607933 | 0.817385245 | -0.280670163 | 0.779969123 | -1.427134929 | 0.159070086 |
| FLJ39534 | -0.602602097 | 0.548337559 | 0.129205703  | 0.897645028 | 0.089542961  | 0.928968557 |
| FLJ39582 | 1.718874033  | 0.089186075 | 0.888790683  | 0.377812556 | -0.367232568 | 0.71482239  |
| FLJ39639 | -0.152123698 | 0.879440839 | -3.649030396 | 0.00056831  | -3.507399394 | 0.000897317 |
| FLJ39653 | -0.754647047 | 0.452494318 | -2.039414145 | 0.046005593 | -1.500540324 | 0.139068346 |
| FLJ40292 | 1.314462658  | 0.192137928 | 0.475958102  | 0.635904662 | 0.40107522   | 0.689884633 |
| FLJ40852 | 1.411434098  | 0.161675297 | 0.647003902  | 0.520199714 | 0.48782539   | 0.627570044 |
| FLJ41484 | -0.159500785 | 0.873643253 | -0.500897278 | 0.618352318 | 0.902279013  | 0.370757054 |
| FLJ42289 | 0.346015019  | 0.730164981 | -0.41563424  | 0.679222135 | -0.411681693 | 0.682137621 |
| FLJ42351 | 1.49162673   | 0.139406434 | 2.375202279  | 0.02088995  | 3.108428302  | 0.002949108 |
| FLJ42418 | -1.107158266 | 0.271270697 | -0.241450788 | 0.81006329  | -1.024617316 | 0.309931102 |
| FLJ42627 | 0.230232624  | 0.818450336 | -1.785679049 | 0.079416096 | -2.694285782 | 0.009282629 |
| FLJ43663 | 1.919697237  | 0.05816623  | -1.183931546 | 0.241303275 | -1.310148673 | 0.195471852 |
| FLJ44511 | -3.340659972 | 0.001231836 | 0.145531959  | 0.884799002 | -0.029063545 | 0.976916807 |
| FLJ44635 | -2.058240831 | 0.042552456 | -3.927515806 | 0.000232078 | -3.945612941 | 0.000233325 |
| FLJ45244 | 0.792576811  | 0.430175759 | 1.473070743  | 0.146176166 | 1.148462341  | 0.255639408 |
| FLJ45340 | -0.369268425 | 0.712822945 | 0.821412145  | 0.41479871  | 0.838785552  | 0.405140967 |
| FLJ45445 | -0.049745643 | 0.960438866 | 0.457901432  | 0.648746107 | -0.004793855 | 0.996192037 |
| FLJ45513 | 0.090042184  | 0.928460219 | 0.907101046  | 0.368132917 | 2.197123309  | 0.032147846 |
| FLJ46906 | 0.257142841  | 0.797674374 | 2.551332303  | 0.013409947 | 2.736313592  | 0.008299613 |
| FLJ90757 | -0.435846741 | 0.664025132 | 0.087628197  | 0.930476145 | -0.020023536 | 0.984095473 |
| FLNA     | -0.703563769 | 0.483579133 | 0.520560191  | 0.604668637 | 0.782371262  | 0.437278402 |
| FLNB     | 1.411893286  | 0.161540426 | 1.621744769  | 0.110320038 | 1.683231652  | 0.097874433 |

|          |              |             |              |             |              |             |
|----------|--------------|-------------|--------------|-------------|--------------|-------------|
| FLNC     | -0.752368469 | 0.453855946 | 1.421176091  | 0.160657413 | 1.636417252  | 0.107337222 |
| FLOT1    | -1.75734581  | 0.082369047 | 0.428636303  | 0.669786773 | -0.128446421 | 0.898253949 |
| FLOT2    | -1.031488244 | 0.305164732 | 0.753033975  | 0.454496534 | 0.719594992  | 0.47475437  |
| FLRT1    | 0.454103899  | 0.650882465 | 1.254257892  | 0.214814704 | 0.477381405  | 0.634940703 |
| FLT1     | 0.541218348  | 0.589737306 | -0.698112696 | 0.487915716 | -0.648290298 | 0.51943558  |
| FLT3     | 0.878715831  | 0.381970615 | 0.32865489   | 0.743608522 | 0.716230707  | 0.476812693 |
| FLT3LG   | 0.193681502  | 0.846875788 | -0.05862289  | 0.953455398 | 0.772227819  | 0.443212768 |
| FLT4     | 2.287343419  | 0.024596653 | 0.203046121  | 0.839814593 | -0.595627063 | 0.553814027 |
| FLVCR1   | 0.588034292  | 0.558029344 | -3.934793189 | 0.000226612 | -4.037722891 | 0.000165069 |
| FLVCR2   | -0.086486404 | 0.931278072 | 1.138738832  | 0.259526345 | 1.092096309  | 0.279447362 |
| FLYWCH1  | 2.691956268  | 0.008515826 | 0.666544536  | 0.507724393 | 2.17137437   | 0.03413732  |
| FLYWCH2  | 0.567571172  | 0.571784779 | 0.306393297  | 0.760410075 | 0.858117586  | 0.394470152 |
| FMN1     | 0.148130802  | 0.882581586 | -1.42810835  | 0.158660888 | -1.754241354 | 0.084836828 |
| FMNL1    | -1.999866884 | 0.0486273   | -0.064785865 | 0.948568833 | -0.299586045 | 0.76559742  |
| FMNL2    | -0.560398202 | 0.576645025 | -2.044063601 | 0.045528809 | -3.798244986 | 0.000359722 |
| FMNL3    | 3.054720858  | 0.00298811  | -1.291526423 | 0.201680204 | 0.13324665   | 0.894473984 |
| FMO4     | 1.090580875  | 0.278462142 | -1.175634778 | 0.244577654 | -0.316859551 | 0.752523473 |
| FMO5     | -0.267316886 | 0.789856488 | 0.61685986   | 0.539757994 | -0.5744523   | 0.567952652 |
| FMOD     | 0.794264925  | 0.429197784 | 2.272613819  | 0.026798589 | 1.966961235  | 0.054128782 |
| FMR1     | 0.271151512  | 0.786915432 | -0.190150698 | 0.849859639 | -1.521679917 | 0.133692705 |
| FN1      | 1.304250452  | 0.195580792 | 2.633036788  | 0.010846381 | 2.717747856  | 0.008721438 |
| FN3K     | 0.549097681  | 0.584341967 | 1.032671127  | 0.306074584 | 1.053069109  | 0.296813056 |
| FN3KRP   | 1.126526842  | 0.26303362  | 1.247567062  | 0.217238302 | 0.799654587  | 0.427275795 |
| FNBP1    | -1.524524491 | 0.130996948 | 0.587924598  | 0.558881116 | 0.655128917  | 0.515055701 |
| FNBP1L   | -0.670919434 | 0.504045346 | 1.284334711  | 0.20416686  | -0.609285608 | 0.544788891 |
| FNBP4    | 3.330525131  | 0.001272257 | -0.222082804 | 0.825035013 | 0.831931569  | 0.408966362 |
| FNDC3A   | 0.579645627  | 0.563648423 | -0.852635925 | 0.397392958 | -1.95534138  | 0.055518731 |
| FNDC3B   | -0.477521071 | 0.634186042 | -0.775743013 | 0.441074426 | -2.524480345 | 0.014435448 |
| FNDC5    | -0.022248067 | 0.982300913 | -0.601390939 | 0.549933935 | 1.003778114  | 0.319785189 |
| FNDC8    | 0.63752869   | 0.525451201 | 0.159283897  | 0.874002448 | 1.227017135  | 0.224928262 |
| FNDC9    | -0.331944014 | 0.740728179 | 0.254286658  | 0.800179765 | 0.135317856  | 0.892843757 |
| FNIP1    | -1.018541435 | 0.311238714 | -1.365867749 | 0.177290474 | -2.924674364 | 0.004963157 |
| FNIP2    | 0.387892737  | 0.699040816 | -1.010106014 | 0.316669245 | -1.991805425 | 0.051256719 |
| FNTA     | 0.055278831  | 0.956042802 | -1.653681987 | 0.103632887 | -1.736330667 | 0.087981207 |
| FNTB     | -0.328882831 | 0.743032911 | -2.213381324 | 0.030847044 | -1.404046538 | 0.165803614 |
| FOLR2    | -0.550046936 | 0.583693549 | 0.702388889  | 0.485265729 | 1.692186401  | 0.096144709 |
| FOLR3    | -2.394446879 | 0.018787767 | -1.201066235 | 0.234641454 | -2.206712969 | 0.031433402 |
| FOPNL    | 0.59629852   | 0.552520857 | -0.215589693 | 0.830069231 | -0.57839776  | 0.565304826 |
| FOS      | -0.167844697 | 0.867094171 | -1.327950641 | 0.18943314  | -2.244410084 | 0.028758684 |
| FOSB     | 2.075123418  | 0.040922063 | -0.652789969 | 0.516488888 | -0.19688634  | 0.844626319 |
| FOSL2    | -2.124384274 | 0.036469075 | -0.201046933 | 0.841370176 | -1.478962993 | 0.144730104 |
| FOX1     | -1.893135463 | 0.061656963 | 1.231636649  | 0.223089834 | 0.386097302  | 0.700881478 |
| FOX2     | 0.036844003  | 0.970693614 | -2.200142761 | 0.031822377 | -3.282282178 | 0.001773013 |
| FOXJ1    | -0.153889101 | 0.878052814 | -2.281616144 | 0.026226365 | -1.942904941 | 0.057040078 |
| FOXJ2    | -1.271052366 | 0.207090683 | 0.456083604  | 0.650044943 | 0.903965694  | 0.369869743 |
| FOXJ3    | 0.467486694  | 0.641318023 | 2.227009757  | 0.029870592 | 1.632548769  | 0.10815139  |
| FOXK1    | 1.41631704   | 0.160245518 | 1.993398795  | 0.050961541 | 1.456665     | 0.1507699   |
| FOXK2    | 0.807624656  | 0.421504587 | 0.610963115  | 0.543627695 | 0.205180542  | 0.838171945 |
| FOXM1    | 1.183270118  | 0.239918432 | 1.395637036  | 0.168181176 | 1.961113826  | 0.054824469 |
| FOXN2    | 0.447298646  | 0.655768706 | -1.037194585 | 0.303980098 | -1.95865294  | 0.05511953  |
| FOXN3    | -0.952579688 | 0.343436454 | 0.122988462  | 0.902544395 | -0.148068761 | 0.882818137 |
| FOXO1    | 0.610234599  | 0.543293727 | 0.181500266  | 0.856612151 | 0.390466009  | 0.697667174 |
| FOXO3    | -4.987601245 | 3.09E-06    | 0.286014274  | 0.775893383 | -0.706044749 | 0.483075115 |
| FOXO3B   | 1.488943675  | 0.140110526 | -1.550260385 | 0.126556837 | -0.778229197 | 0.439696002 |
| FOXO4    | -3.475453991 | 0.000797016 | -0.760907241 | 0.449816506 | -1.095762995 | 0.277853022 |
| FOXP1    | 0.665393038  | 0.507555557 | 1.663227766  | 0.101699564 | 2.162546112  | 0.034843886 |
| FOXP3    | -0.886351566 | 0.377866338 | -0.825050019 | 0.41274727  | -0.232238086 | 0.817196174 |
| FOXP4    | 0.049464932  | 0.960661922 | -0.094037329 | 0.925405877 | 0.403476343  | 0.688127881 |
| FOXRED1  | 1.38114255   | 0.170764781 | 1.892925842  | 0.063395962 | 2.584767874  | 0.012365539 |
| FOXRED2  | 0.47624911   | 0.635088202 | 0.260299882  | 0.79556079  | 0.791166966  | 0.432170748 |
| FP588    | 1.503831408  | 0.136238574 | -2.394651034 | 0.019911216 | -0.658265845 | 0.513053225 |
| FPGS     | 2.244651404  | 0.027321513 | -0.510957441 | 0.611333929 | 0.221271677  | 0.825682374 |
| FPGT     | 0.359320802  | 0.720223878 | -0.785543897 | 0.435354387 | -0.987087079 | 0.327827958 |
| FPR1     | -2.760666459 | 0.007031431 | -0.363679616 | 0.717428818 | -1.530225644 | 0.131566996 |
| FPR2     | -2.240894685 | 0.02757352  | -0.217364232 | 0.828692681 | -1.934550718 | 0.058081925 |
| FPR3     | -0.575139999 | 0.566677889 | 1.936272472  | 0.057746496 | -0.158554076 | 0.874588221 |
| FRA10AC1 | 0.743291515  | 0.459303408 | -0.037394063 | 0.970300113 | 0.82730419   | 0.411561469 |
| FRAT1    | -2.569325612 | 0.011889336 | -1.862630697 | 0.067616961 | -2.061513241 | 0.043887796 |
| FRAT2    | -3.191880315 | 0.001966098 | -0.718961241 | 0.475071675 | -0.958029621 | 0.342148521 |
| FRG1     | -0.574772282 | 0.566925483 | 0.580500894  | 0.563841298 | 1.319147586  | 0.192465889 |
| FRG1B    | 1.810436836  | 0.073672816 | 0.921066211  | 0.360857807 | 0.737214792  | 0.464056523 |
| FRMD3    | -4.180084173 | 6.91E-05    | 3.24648371   | 0.00194959  | 0.583990781  | 0.56156178  |



|        |              |             |              |             |              |             |
|--------|--------------|-------------|--------------|-------------|--------------|-------------|
| FRMD4A | 1.110029523  | 0.270038384 | -0.374194704 | 0.709633539 | -0.132653483 | 0.894940945 |
| FRMD4B | -0.121346069 | 0.903696158 | 0.849460293  | 0.399142306 | 0.608520593  | 0.5452924   |
| FRMD6  | -0.750622227 | 0.454901051 | 0.494167207  | 0.62306758  | -0.274585052 | 0.784641259 |
| FRMD8  | -0.407910945 | 0.684338997 | 0.478113471  | 0.634379193 | 0.538101091  | 0.592630642 |
| FRRS1  | 2.08240188   | 0.040235947 | -0.159996435 | 0.873443676 | -0.970952729 | 0.335729533 |
| FRS2   | -0.018767245 | 0.985069665 | -2.256291639 | 0.027864357 | -2.612963253 | 0.011493383 |
| FRS3   | 0.782640802  | 0.435958598 | -2.074660467 | 0.042496548 | -2.879364626 | 0.005626899 |
| FRY    | -2.451930997 | 0.016203124 | -0.89531522  | 0.374345099 | -1.967628943 | 0.054049826 |
| FRYL   | 0.022861513  | 0.981812981 | 0.082392514  | 0.934620258 | -0.914052942 | 0.364591472 |
| FSCN1  | -0.927945746 | 0.355997481 | 0.717865522  | 0.475741934 | 0.525195524  | 0.601511867 |
| FSCN2  | 0.609656692  | 0.543674804 | -0.718402069 | 0.475413659 | 0.340730183  | 0.734576355 |
| FSD1   | -0.389867207 | 0.697585496 | -1.025654138 | 0.309343029 | -0.58973175  | 0.557732565 |
| FSD1L  | -0.054768699 | 0.956448042 | -0.414512235 | 0.680038803 | -1.90381643  | 0.062055585 |
| FSIP2  | -0.808556051 | 0.420971328 | 1.51198091   | 0.136006486 | 0.470342014  | 0.639929737 |
| FSTL1  | -4.705470315 | 9.45E-06    | 1.742247032  | 0.086802968 | 0.616399571  | 0.540118094 |
| FSTL3  | -0.426452371 | 0.670829318 | -0.773369543 | 0.442466261 | 0.327151093  | 0.744768264 |
| FSTL4  | -0.852915998 | 0.396042882 | 1.145251192  | 0.256841636 | 1.6792744    | 0.09864692  |
| FTH1   | -2.555556269 | 0.012335181 | -0.182897263 | 0.855520914 | -0.224763688 | 0.822977809 |
| FTH1P3 | -0.257721261 | 0.797229346 | 0.635250368  | 0.527780913 | 0.298340271  | 0.766543027 |
| FTL    | -3.517647761 | 0.000693906 | -0.277951932 | 0.782044601 | -0.142141283 | 0.887476425 |
| FTO    | -0.244085816 | 0.807737809 | 1.099371874  | 0.276179947 | 1.644649928  | 0.105621149 |
| FTSJ1  | 1.112863995  | 0.268825695 | 1.011256917  | 0.316122972 | 2.358013119  | 0.021875435 |
| FTSJ2  | -0.206628333 | 0.836781904 | 3.667686815  | 0.000535771 | 4.218318669  | 9.04E-05    |
| FTSJ3  | 0.74585998   | 0.457758196 | 2.007798748  | 0.049363469 | 2.583093581  | 0.012419176 |
| FTSJD1 | 1.341255419  | 0.183320969 | 0.018516944  | 0.985290458 | -0.496212532 | 0.62167842  |
| FTSJD2 | -0.517278248 | 0.606271788 | 0.547125373  | 0.586406346 | -0.478492908 | 0.634154493 |
| FTX    | -0.664722373 | 0.507982431 | -1.179332358 | 0.243114445 | -1.501782156 | 0.138747902 |
| FUBP1  | 0.772196842  | 0.442085946 | 0.525271983  | 0.603276496 | 0.659847421  | 0.512045197 |
| FUBP3  | 2.107331885  | 0.037960573 | -1.576083199 | 0.120483887 | -2.410052013 | 0.019245708 |
| FUCA1  | 0.700016276  | 0.485780776 | 3.91188907   | 0.000244247 | 3.173345209  | 0.002443225 |
| FUCA2  | -0.965672228 | 0.336879121 | 2.270405592  | 0.026940632 | 1.672331035  | 0.100014394 |
| FUK    | 2.313707231  | 0.023036195 | 0.909544748  | 0.366853157 | 1.491880505  | 0.141319235 |
| FUNDC1 | -0.148190206 | 0.882534846 | -1.133519986 | 0.261692154 | -0.302767078 | 0.76318448  |
| FUNDC2 | -1.443573749 | 0.152442463 | -0.305771849 | 0.760880814 | -0.170699518 | 0.865072714 |
| FURIN  | -2.308156355 | 0.023357282 | -0.422504013 | 0.674230319 | -1.187819763 | 0.239897039 |
| FUS    | -0.730575418 | 0.466997164 | -1.403093684 | 0.165956915 | -0.430323503 | 0.668605006 |
| FUT10  | 1.102493711  | 0.27328102  | -1.13808226  | 0.259798118 | -0.701077022 | 0.486145882 |
| FUT11  | 0.77388335   | 0.441093111 | -3.340826403 | 0.001470702 | -2.17052989  | 0.034204359 |
| FUT2   | 1.058527612  | 0.2927388   | -0.315183652 | 0.753761329 | 1.562363592  | 0.123812719 |
| FUT4   | 0.25645262   | 0.798205509 | -2.860814904 | 0.00587844  | -3.815516944 | 0.000340329 |
| FUT7   | -1.282800596 | 0.202961653 | 0.420322796  | 0.675813687 | -0.198736738 | 0.843185433 |
| FUT8   | 0.408173266  | 0.684147133 | 1.639768546  | 0.106504379 | 2.31276767   | 0.024417965 |
| FUZ    | -0.785022363 | 0.434568371 | -1.602267509 | 0.114567202 | -1.429168531 | 0.158487333 |
| FXC1   | 0.960817041  | 0.339301202 | -1.661072155 | 0.102133548 | 0.082400014  | 0.934621213 |
| FXN    | 2.257376682  | 0.02648284  | -1.536478545 | 0.129896745 | 1.00926453   | 0.317170677 |
| FXR1   | 0.949049855  | 0.345218456 | 0.483279072  | 0.630729717 | 0.706901668  | 0.482546512 |
| FXR2   | -0.639573306 | 0.524126985 | -0.187188902 | 0.852170367 | -0.120458436 | 0.904549345 |
| FXYD1  | -1.444352017 | 0.152224058 | -4.435591537 | 4.19E-05    | -4.499926457 | 3.46E-05    |
| FXYD2  | 1.744712488  | 0.084558606 | -1.496149106 | 0.140074611 | -1.017982678 | 0.313045792 |
| FXYD5  | -1.293642111 | 0.199205705 | -1.645918172 | 0.105227318 | -1.549281921 | 0.126923722 |
| FXYD6  | -2.088352031 | 0.039682442 | 2.037646753  | 0.046187962 | 2.025551201  | 0.047566085 |
| FXYD7  | 1.152684214  | 0.252190539 | -2.168990349 | 0.0342252   | -0.083947908 | 0.933395971 |
| FYB    | 0.349844498  | 0.727298698 | -1.313187331 | 0.194327555 | -2.460661454 | 0.016963993 |
| FYCO1  | 1.385521793  | 0.16942714  | 0.265272486  | 0.791746691 | 0.033495483  | 0.973398072 |
| FYN    | 0.864005516  | 0.389955591 | -0.134528433 | 0.893453734 | 0.832213417  | 0.408808621 |
| FYTTD1 | -0.419341715 | 0.675997806 | -0.571972116 | 0.569566573 | -1.248707455 | 0.216945379 |
| FZD1   | -1.236791623 | 0.219485501 | -0.143238699 | 0.88660162  | -0.606484067 | 0.546633931 |
| FZD2   | -0.315524819 | 0.753117205 | 1.064663269  | 0.291471398 | 0.362712279  | 0.718179504 |
| FZD3   | 1.103078739  | 0.273028319 | -1.615165264 | 0.111740246 | -1.466187081 | 0.148166965 |
| FZD4   | -1.743734007 | 0.084730173 | -0.398892502 | 0.691447503 | -1.923327802 | 0.059507045 |
| FZD5   | -2.098073935 | 0.038792217 | 0.339951233  | 0.735129897 | -1.014929463 | 0.314486238 |
| FZD6   | 0.556522975  | 0.579279013 | -0.204671121 | 0.83855064  | -0.529859101 | 0.598295418 |
| FZR1   | -0.68046708  | 0.498011784 | -0.389031341 | 0.698687528 | -0.373561799 | 0.710134948 |
| GOS2   | -3.878105871 | 0.000203717 | -1.634380546 | 0.107633612 | -1.962255325 | 0.054688062 |
| G2E3   | 0.322549701  | 0.74780848  | -1.238878407 | 0.220415608 | -1.88467616  | 0.064645167 |
| G3BP1  | 0.933035997  | 0.353378052 | 1.812729364  | 0.075086072 | 1.103570935  | 0.274479211 |
| G3BP2  | 0.265078647  | 0.791574569 | 0.169556225  | 0.865953276 | -0.055129215 | 0.956230914 |
| G6PC3  | -0.696628418 | 0.487888487 | -2.149808572 | 0.035782615 | -0.942189277 | 0.350125748 |
| G6PD   | -2.21208511  | 0.029574825 | -0.348776722 | 0.728528715 | -0.515850987 | 0.607980745 |
| GAA    | -1.788406458 | 0.077184003 | 0.412214754  | 0.681712261 | -0.000662262 | 0.999473935 |
| GAB1   | -1.544747568 | 0.126029375 | -1.155305688 | 0.252735642 | -2.386970372 | 0.020374977 |
| GAB2   | -2.40923854  | 0.018089812 | 0.006336076  | 0.994966471 | -0.796819431 | 0.428907177 |

|            |              |             |              |             |              |             |
|------------|--------------|-------------|--------------|-------------|--------------|-------------|
| GAB3       | 1.608938993  | 0.111244799 | -0.858009844 | 0.394443475 | -0.647917012 | 0.519675223 |
| GABARAP    | -3.615183481 | 0.000501728 | -0.633025062 | 0.529222749 | -0.622739004 | 0.535973232 |
| GABARAPL1  | -5.975372056 | 4.89E-08    | -2.233670877 | 0.029403332 | -2.715403108 | 0.008776089 |
| GABARAPL2  | -2.459677762 | 0.015880279 | -0.241564739 | 0.80997541  | -0.466454412 | 0.642692202 |
| GABBR1     | 2.222352675  | 0.028847449 | -1.011993986 | 0.315773458 | 0.255781082  | 0.799053151 |
| GABPA      | 0.405475985  | 0.686120936 | -1.014659384 | 0.314511716 | -2.073699355 | 0.042698579 |
| GABPB1     | -0.082325332 | 0.934576714 | 0.467904051  | 0.641618934 | -0.006461523 | 0.994867354 |
| GABPB2     | 1.48267009   | 0.141767712 | -0.51894887  | 0.605784721 | 0.35358532   | 0.724971818 |
| GABRR2     | 2.277672369  | 0.025192015 | -0.655628829 | 0.51467338  | -1.375994952 | 0.174278406 |
| GADD45A    | -1.477017993 | 0.143273809 | -0.049838825 | 0.96042326  | -0.782916099 | 0.436960983 |
| GADD45B    | -2.456363164 | 0.016017703 | 0.453373642  | 0.651983235 | -1.706736687 | 0.093387762 |
| GADD45G    | -1.703508143 | 0.092035036 | -0.365260134 | 0.716255159 | -1.374219706 | 0.174825713 |
| GADD45GIP1 | 0.734212192  | 0.464789372 | 0.006266905  | 0.995021422 | 0.822906817  | 0.41403686  |
| GAK        | -0.524901353 | 0.600983935 | 0.389355288  | 0.698449236 | 1.0457962    | 0.300129493 |
| GAL3ST4    | 0.942691588  | 0.348443467 | 0.314481693  | 0.754291588 | 1.578140014  | 0.120142482 |
| GALC       | 0.55738427   | 0.578693095 | -1.440394911 | 0.155169716 | -2.324848344 | 0.02371456  |
| GALE       | -0.32454201  | 0.746305085 | 0.15854468   | 0.87458221  | 0.292176748  | 0.771226692 |
| GALK1      | -0.094950694 | 0.924571872 | 0.430557866  | 0.668396809 | -0.044158214 | 0.964934714 |
| GALK2      | 0.274873806  | 0.784063486 | 1.221094832  | 0.22702517  | 0.989892534  | 0.326466772 |
| GALM       | -2.181134016 | 0.031865405 | 1.257128826  | 0.213780929 | 0.573689031  | 0.568465559 |
| GALNS      | -1.15705363  | 0.250410619 | -0.16290469  | 0.871163701 | 0.010454027  | 0.991696043 |
| GALNT1     | -0.556935386 | 0.578998424 | -0.131980535 | 0.895459661 | -0.573770905 | 0.568410557 |
| GALNT10    | -0.608367698 | 0.544525268 | 1.479359571  | 0.144493166 | 1.39705865   | 0.167884397 |
| GALNT11    | 1.010049036  | 0.31526668  | -0.321877982 | 0.748710455 | -0.136231344 | 0.892124906 |
| GALNT12    | 2.924942849  | 0.004390446 | 1.253015852  | 0.215263086 | 1.805522141  | 0.076346533 |
| GALNT14    | -1.044268535 | 0.961455025 | 0.965638926  | 0.338262032 | -0.024718239 | 0.980367209 |
| GALNT2     | -0.740516105 | 0.460976457 | 0.816679484  | 0.417476752 | 0.31451549   | 0.75429347  |
| GALNT3     | -0.909648805 | 0.365515547 | -0.683543862 | 0.49700398  | -2.044567448 | 0.045589169 |
| GALNT4     | 1.155517072  | 0.251035529 | -1.089441171 | 0.280496635 | -3.125270359 | 0.002809175 |
| GALNT6     | -1.044268535 | 0.299247842 | 2.890552988  | 0.005414586 | 3.470871092  | 0.001003799 |
| GALNT7     | -0.672527514 | 0.503026391 | -1.025959703 | 0.309200209 | -2.422935227 | 0.018640118 |
| GALNT9     | -0.284786526 | 0.776483035 | -0.013559915 | 0.989227946 | -0.532960761 | 0.596160664 |
| GALT       | 1.807497363  | 0.074133486 | -0.492229121 | 0.624428411 | -0.451848351 | 0.653116185 |
| GAMT       | 1.137562205  | 0.258419813 | -1.05884607  | 0.294090364 | -0.832653506 | 0.408562393 |
| GAN        | 0.99624172   | 0.321889581 | -0.296657421 | 0.767795222 | -1.352499213 | 0.18162918  |
| GANAB      | -0.08992895  | 0.92854994  | 1.595422851  | 0.116090725 | 1.88107622   | 0.065142316 |
| GANC       | 1.513235871  | 0.133836323 | 0.928190325  | 0.357182418 | 0.8713332    | 0.387276887 |
| GAPDH      | -1.697991311 | 0.093075875 | 0.572426696  | 0.569260702 | 0.51895668   | 0.605827254 |
| GAPDHS     | 1.387790265  | 0.168737384 | 1.438503622  | 0.155703186 | 2.021320155  | 0.048015873 |
| GAPT       | -0.315716657 | 0.752972074 | -1.099789593 | 0.275999396 | -1.668227807 | 0.100829783 |
| GAPVD1     | -0.024782238 | 0.980285291 | 0.406349516  | 0.685991709 | 0.63374829   | 0.5288144   |
| GAR1       | -0.084577728 | 0.932791007 | -0.170069897 | 0.865551141 | 1.182134057  | 0.242126868 |
| GARNL3     | 1.521119713  | 0.131848287 | -0.342201848 | 0.733444578 | -0.539156398 | 0.591907149 |
| GARS       | -0.046350477 | 0.963136907 | 3.398254441  | 0.001236136 | 4.120389302  | 0.000125511 |
| GART       | 2.007656274  | 0.047776074 | 3.305652125  | 0.001634532 | 2.847455872  | 0.006142681 |
| GAS1       | -0.184271461 | 0.854228416 | -1.378953169 | 0.173240948 | -1.805958437 | 0.076277467 |
| GAS2       | -0.081103212 | 0.935545754 | -1.287103459 | 0.203206821 | -1.177105337 | 0.244111483 |
| GAS2L1     | 2.364647613  | 0.020267016 | 0.446919381  | 0.656609331 | -1.217728096 | 0.228412134 |
| GAS5       | 0.635013329  | 0.527082683 | -0.02348091  | 0.981347828 | 0.462565494  | 0.645460689 |
| GAS6       | 4.250326539  | 5.33E-05    | 1.04441143   | 0.30065877  | 1.203254464  | 0.233918875 |
| GAS7       | -0.612711858 | 0.54166173  | -0.001726695 | 0.998628264 | 0.202726006  | 0.84008087  |
| GAS8       | 0.552445144  | 0.582056899 | 1.675969597  | 0.099164962 | 0.71863989   | 0.475338207 |
| GATA1      | -3.008418346 | 0.003432191 | 0.674263748  | 0.502840981 | -0.128189284 | 0.898456501 |
| GATA2      | -4.229826252 | 5.75E-05    | 1.010179361  | 0.316634412 | -2.524851675 | 0.014421791 |
| GATA3      | -0.035857734 | 0.971477766 | 1.220230917  | 0.227349914 | 0.707265395  | 0.482322239 |
| GATAD1     | 2.413335431  | 0.017900627 | -1.97815744  | 0.052701223 | -1.596485566 | 0.115985115 |
| GATAD2A    | -1.482412595 | 0.141836055 | -0.060465946 | 0.951993859 | -0.177638519 | 0.859645173 |
| GATAD2B    | -0.740205191 | 0.461164095 | -0.181649167 | 0.856495827 | 0.490553985  | 0.625650616 |
| GATC       | 2.023836985  | 0.046048498 | -0.833485676 | 0.408014102 | 0.111540853  | 0.91158463  |
| GATM       | 0.831446626  | 0.407992658 | -0.292555405 | 0.77091334  | -0.368682623 | 0.713748656 |
| GATS       | -2.275724778 | 0.025313434 | -1.343110886 | 0.184504748 | -0.555892368 | 0.580489459 |
| GATSL3     | -0.74528456  | 0.458104115 | -0.318623205 | 0.751164819 | -0.018261639 | 0.985494767 |
| GBA        | -2.164016254 | 0.033197515 | 1.116923638  | 0.268664683 | 1.369340392  | 0.176336788 |
| GBA2       | -1.014687646 | 0.313062277 | 0.258248479  | 0.79713573  | 1.201842313  | 0.234461282 |
| GBAP1      | 0.31042094   | 0.756981702 | -0.697228851 | 0.488464439 | 0.56077054   | 0.577181495 |
| GBAS       | 0.563075238  | 0.574828807 | -1.818325803 | 0.074215375 | -1.725194189 | 0.089984536 |
| GBE1       | -1.495397907 | 0.138421483 | 0.989648575  | 0.326485332 | 0.484952812  | 0.629593557 |
| GBF1       | -0.748379735 | 0.456245175 | 0.842950087  | 0.402743397 | 1.22166485   | 0.226930858 |
| GBGT1      | -1.013279437 | 0.313730405 | 0.287890583  | 0.774463891 | -0.556609022 | 0.580002914 |
| GBP1       | -1.153959153 | 0.251670257 | 0.426394454  | 0.671409885 | -1.731077337 | 0.088921575 |
| GBP1P1     | -0.876289989 | 0.383280328 | -0.446527596 | 0.656890581 | -2.434877476 | 0.018094105 |
| GBP2       | -1.341541878 | 0.183228377 | 1.172780132  | 0.245711629 | 0.06030632   | 0.952125473 |

|           |              |             |              |             |              |             |
|-----------|--------------|-------------|--------------|-------------|--------------|-------------|
| GBP3      | -0.825147517 | 0.411539773 | 0.437869354  | 0.663118728 | -0.610789472 | 0.543799788 |
| GBP4      | -1.250919512 | 0.214310201 | -1.487911312 | 0.142229067 | -1.802477624 | 0.076829944 |
| GBP5      | -0.740461698 | 0.461009289 | -1.665409611 | 0.101261833 | -3.134394558 | 0.002735991 |
| GBP6      | -2.498799885 | 0.01433617  | -0.192594247 | 0.847954232 | -1.568639487 | 0.122342067 |
| GCA       | -0.369015807 | 0.713010554 | -0.059696892 | 0.952603698 | -0.678567753 | 0.50019473  |
| GCAT      | -2.223951553 | 0.028735602 | 0.009665564  | 0.992321517 | -0.821633233 | 0.414755478 |
| GCC1      | -1.563714537 | 0.121507128 | 2.579872778  | 0.012457816 | 2.1958561    | 0.032243316 |
| GCC2      | 0.97085575   | 0.334305759 | -0.701709787 | 0.485686039 | -1.005789658 | 0.318824926 |
| GCDH      | 0.330164899  | 0.742067369 | 1.217496404  | 0.228380052 | 2.229141757  | 0.029816779 |
| GCET2     | 2.691494029  | 0.008526712 | -0.389950186 | 0.698011714 | 0.954339876  | 0.343995938 |
| GCFC1     | 1.84724031   | 0.06810394  | 0.038120501  | 0.969723428 | -0.522500695 | 0.603374124 |
| GCFC1-AS1 | 3.130892907  | 0.002371845 | 0.049601584  | 0.960611494 | -0.937527469 | 0.352496341 |
| GCH1      | -0.247410806 | 0.805171995 | -0.153937838 | 0.87819686  | -2.172619048 | 0.034038721 |
| GCHFR     | 1.389200411  | 0.168309695 | -0.136485582 | 0.891913372 | 0.281385339  | 0.779447652 |
| GCLC      | 0.444257367  | 0.657957247 | 0.6066763    | 0.546449757 | 0.906740313  | 0.368413051 |
| GCLM      | -0.688609827 | 0.492897086 | -0.688895479 | 0.493654839 | -1.716806824 | 0.091518095 |
| GCM1      | -0.502900283 | 0.616302385 | 0.745094957  | 0.459244036 | 0.975271591  | 0.333602187 |
| GCN1L1    | 1.630115426  | 0.106684695 | 2.527263431  | 0.014263678 | 2.537424627  | 0.013966236 |
| GCNT1     | 0.904723597  | 0.368105    | 1.377194413  | 0.173781064 | 0.029228351  | 0.976785951 |
| GCNT2     | 0.180064815  | 0.857519532 | 1.022823613  | 0.310668136 | 0.537155734  | 0.593279109 |
| GCNT4     | 1.628564237  | 0.107013529 | -0.408643784 | 0.684316504 | -0.751335421 | 0.455583578 |
| GCNT7     | 0.500054481  | 0.618296474 | 0.260775078  | 0.795196086 | 0.554888854  | 0.581171087 |
| GCOM1     | -2.386904081 | 0.019152823 | 0.795063925  | 0.429840537 | 0.599249823  | 0.551412911 |
| GCSH      | 0.324233177  | 0.746538066 | 0.244912197  | 0.807394895 | 0.478785649  | 0.633947496 |
| GDAP1     | 0.51203278   | 0.609922616 | 1.776593284  | 0.080916444 | 0.209250251  | 0.835009037 |
| GDAP2     | 0.206491514  | 0.836888435 | -0.915787483 | 0.363596795 | -1.746764716 | 0.086137886 |
| GDE1      | -3.295853593 | 0.001420154 | 0.429291881  | 0.66931243  | -0.195985618 | 0.845327896 |
| GDF11     | 0.749790103  | 0.455399552 | -1.844643423 | 0.070233624 | -0.98843833  | 0.327171869 |
| GDF15     | -0.199029854 | 0.842702792 | -1.910288283 | 0.061079139 | -1.292916677 | 0.201326372 |
| GDF9      | -0.355894238 | 0.722779439 | -0.411064594 | 0.682550629 | -0.126269457 | 0.899968998 |
| GDI1      | -1.103873624 | 0.272685231 | -0.510623482 | 0.61156633  | -0.159589518 | 0.873776243 |
| GDI2      | -0.36767318  | 0.714007964 | 1.923168642  | 0.059407248 | 2.041927197  | 0.045859327 |
| GDPD1     | 0.226641783  | 0.82123282  | -1.607068425 | 0.113508252 | -1.834663165 | 0.071847098 |
| GDPD3     | 0.165799246  | 0.868698792 | -0.177326283 | 0.859874244 | 0.713187643  | 0.478678802 |
| GDPD5     | 0.394599478  | 0.694102097 | 1.376087934  | 0.174121527 | 1.188034104  | 0.23981327  |
| GEMIN2    | 0.521626427  | 0.603253029 | -0.016841374 | 0.986621367 | 0.41569963   | 0.679211809 |
| GEMIN4    | 0.788432039  | 0.432582525 | 3.315788212  | 0.001585634 | 4.675610876  | 1.88E-05    |
| GEMIN5    | 1.305819706  | 0.195048775 | 2.889987856  | 0.005423075 | 2.714467325  | 0.008797987 |
| GEMIN6    | 0.226554338  | 0.821300608 | -0.246421278 | 0.806232265 | 0.445251176  | 0.65784748  |
| GEMIN7    | 0.212269759  | 0.832392048 | 0.683308329  | 0.497151666 | 2.103653597  | 0.039893648 |
| GEMIN8    | 0.745615929  | 0.457904891 | -1.958386064 | 0.055033665 | -0.579275426 | 0.564716647 |
| GEN1      | 0.902721437  | 0.36916096  | 0.049423862  | 0.960752506 | -0.027249763 | 0.978356996 |
| GET4      | 0.025909017  | 0.979389116 | 0.873607505  | 0.385959939 | 0.952175971  | 0.34508242  |
| GFER      | 0.965827172  | 0.336802012 | -1.203961918 | 0.233528967 | -0.734411354 | 0.465749356 |
| GFI1      | 1.704388365  | 0.091869851 | -2.867309664 | 0.005774104 | -1.865991295 | 0.067260882 |
| GFI1B     | -3.587076561 | 0.000551189 | 1.334299407  | 0.187357255 | 0.689322378  | 0.493454918 |
| GFM1      | 0.341987056  | 0.733183587 | 0.840889398  | 0.403887409 | 1.25973734   | 0.212967123 |
| GFM2      | 0.509005672  | 0.612033983 | -0.676744926 | 0.501276738 | -0.270414575 | 0.787831288 |
| GFOD1     | 0.117529357  | 0.906710906 | -2.399329678 | 0.019681986 | -3.58760368  | 0.000699979 |
| GFOD2     | -2.286286743 | 0.024661095 | 0.970453236  | 0.335878447 | 1.710150737  | 0.092750399 |
| GFPT1     | 1.58176232   | 0.117324826 | -0.442740157 | 0.65961203  | -0.417341735 | 0.678017472 |
| GFPT2     | -1.796113808 | 0.075940152 | -0.117086587 | 0.907198773 | -0.156913071 | 0.875875349 |
| GFRA2     | -0.192883073 | 0.847499131 | 0.387151593  | 0.700070855 | 0.739109227  | 0.462914579 |
| GGA1      | 0.232158617  | 0.816958871 | -0.167053843 | 0.867912808 | 1.470701428  | 0.146945313 |
| GGA2      | 1.668672956  | 0.098769577 | 1.500230161  | 0.139016866 | 2.309166131  | 0.02463123  |
| GGA3      | -0.581936661 | 0.562111042 | -0.441468338 | 0.660526931 | 0.07441103   | 0.94094739  |
| GGCT      | 2.368473179  | 0.020071501 | -0.479431658 | 0.633447028 | 0.763487943  | 0.448363687 |
| GGCX      | 0.698250294  | 0.486878833 | -0.448452353 | 0.65550934  | -0.062563002 | 0.950336328 |
| GGH       | -0.593353953 | 0.55448043  | 1.071426862  | 0.288446639 | 0.962042913  | 0.340146518 |
| GGN       | 1.450058779  | 0.150629966 | -2.683184203 | 0.009503002 | -0.798650847 | 0.427852934 |
| GGNBP2    | -0.015259433 | 0.98786007  | 2.946685469  | 0.004630138 | 2.632963036  | 0.010909127 |
| GGPS1     | -0.063243791 | 0.94971714  | -0.756767256 | 0.452273894 | -0.912930925 | 0.36517618  |
| GGT1      | -0.316652945 | 0.752263869 | 1.871312281  | 0.066383766 | 0.652374333  | 0.516817536 |
| GGT5      | -0.291068559 | 0.771690177 | 0.175236091  | 0.861508718 | -0.088966201 | 0.929424849 |
| GGT7      | 3.534301745  | 0.000656789 | -1.10872905  | 0.272155299 | 0.396201989  | 0.693455342 |
| GGTA1P    | -2.966282499 | 0.003888662 | 0.21332351   | 0.831827939 | -0.078067224 | 0.938051688 |
| GHDC      | 0.334506158  | 0.738800984 | 2.115557282  | 0.038718209 | 2.46730726   | 0.016683208 |
| GHITM     | -1.860573479 | 0.066175322 | 0.620982986  | 0.537060651 | 1.245777205  | 0.218011434 |
| GHRL      | -2.160518159 | 0.033475627 | -1.273406152 | 0.207989309 | -1.818259432 | 0.074351631 |
| GHRLOS    | 0.082611793  | 0.934349588 | 0.426411876  | 0.671397265 | 1.400366767  | 0.166896843 |
| GHRLOS2   | 1.176498348  | 0.242597904 | -0.942251427 | 0.349999452 | 1.188722604  | 0.239544333 |
| GIGYF1    | 0.896878617  | 0.372253464 | 0.253514283  | 0.800773578 | 1.630092614  | 0.108670917 |

|         |              |             |              |             |              |             |
|---------|--------------|-------------|--------------|-------------|--------------|-------------|
| GIGYF2  | -0.329834364 | 0.74231626  | -0.075529013 | 0.940055547 | -0.033269683 | 0.973577333 |
| GIMAP1  | 2.715923232  | 0.00796841  | -0.98534803  | 0.328574406 | -0.124879471 | 0.901064304 |
| GIMAP2  | 1.221917938  | 0.22503199  | -0.259033014 | 0.796533312 | -0.345467758 | 0.731031683 |
| GIMAP4  | -0.757663398 | 0.45069543  | 1.57561761   | 0.120591274 | 0.767294983  | 0.446115697 |
| GIMAP5  | 1.822439613  | 0.071816404 | -3.241994782 | 0.001975693 | -2.815856243 | 0.006696242 |
| GIMAP6  | 2.526294011  | 0.01333306  | -1.164875084 | 0.248871546 | -0.272225339 | 0.786445768 |
| GIMAP7  | 1.751512555  | 0.083374164 | 0.017242438  | 0.986302798 | 0.437305398  | 0.663564677 |
| GIMAP8  | -0.018426797 | 0.985340478 | 2.139165251  | 0.036673253 | 1.460732945  | 0.14965355  |
| GIN1    | 1.281343553  | 0.203470407 | -0.129074969 | 0.89774801  | -0.081803124 | 0.935093727 |
| GIN51   | 0.090120428  | 0.928398223 | 1.20022495   | 0.234965387 | 1.24617641   | 0.217865972 |
| GIN52   | 0.562296854  | 0.575356613 | 0.834796957  | 0.407281346 | 0.940696167  | 0.350883882 |
| GIN53   | -0.894194525 | 0.373679567 | 0.010612431  | 0.991569338 | 1.876137065  | 0.065829676 |
| GIN54   | 2.002375592  | 0.048351744 | 0.679295323  | 0.499671616 | 1.669852858  | 0.100506207 |
| GIPC1   | 1.433943913  | 0.155164993 | 0.990041796  | 0.326294761 | 1.817914916  | 0.074405007 |
| GIPC3   | 0.245840704  | 0.80638334  | 1.431997881  | 0.157549154 | 1.944738964  | 0.056813508 |
| GIPR    | 4.093527839  | 9.46E-05    | -0.064447839 | 0.948836801 | -0.108172399 | 0.914243965 |
| GIT1    | 0.295455106  | 0.768348709 | -0.335108674 | 0.738760562 | 0.382397074  | 0.703608255 |
| GIT2    | -1.614380059 | 0.110058443 | 0.281694167  | 0.779187671 | 0.273499375  | 0.785471346 |
| GJA3    | 0.612324811  | 0.541916549 | -0.903317567 | 0.370119933 | -0.253989307 | 0.800430179 |
| GJB6    | 0.80044318   | 0.425629764 | -0.150059149 | 0.881242208 | 2.413545855  | 0.019079755 |
| GJC2    | 0.053620764  | 0.957359983 | -0.546998323 | 0.586493059 | -0.952887129 | 0.34725105  |
| GJD3    | 1.340380993  | 0.183603829 | -0.168104754 | 0.867089772 | -2.445782075 | 0.017608141 |
| GK      | -0.152142724 | 0.879425879 | -1.257638015 | 0.213597964 | -2.653848745 | 0.010328028 |
| GK3P    | -0.567773213 | 0.571648168 | 0.546163351  | 0.58706309  | -0.635616605 | 0.527604499 |
| GK5     | 1.849852056  | 0.067722496 | -2.713635218 | 0.008763394 | -1.711377863 | 0.092522186 |
| GKAP1   | 0.844280498  | 0.400823304 | 0.488544944  | 0.627018889 | -0.137169037 | 0.891387102 |
| GLA     | -2.066611918 | 0.041737183 | 1.064226568  | 0.291667445 | 0.691765572  | 0.491930783 |
| GLB1    | -2.061760128 | 0.042208052 | 0.963847815  | 0.339151657 | 0.429266196  | 0.669369637 |
| GLB1L   | -0.299522173 | 0.765254514 | 1.43270354   | 0.157348108 | 0.735792867  | 0.464914702 |
| GLB1L2  | -0.515917485 | 0.607217919 | -0.586958233 | 0.559525565 | -0.554827957 | 0.581212463 |
| GLB1L3  | 0.327389644  | 0.744157968 | 0.885228543  | 0.379714194 | 0.838493493  | 0.405303525 |
| GLCCI1  | 0.548886007  | 0.584486604 | -2.804477626 | 0.006859391 | -3.134905097 | 0.002731949 |
| GLCE    | 1.905081039  | 0.060065833 | -0.264627261 | 0.792241307 | -1.512390494 | 0.136034258 |
| GLDC    | 0.078468242  | 0.937635399 | 0.557059252  | 0.579645308 | 0.959427455  | 0.341450344 |
| GLE1    | 0.229653954  | 0.818898581 | 2.396244766  | 0.019832864 | 2.839179684  | 0.006283423 |
| GLG1    | -0.423052606 | 0.673298532 | 1.920564658  | 0.059742071 | 2.259862468  | 0.027721769 |
| GLI1    | -0.02471785  | 0.980336502 | -0.003931659 | 0.996876584 | 0.473378689  | 0.637775483 |
| GLI4    | -0.561987979 | 0.575566119 | -2.375232429 | 0.0208884   | -1.934138792 | 0.058133713 |
| GLIPR1  | 0.335247021  | 0.738244033 | -2.299784223 | 0.025104431 | -2.309123677 | 0.024633753 |
| GLIPR2  | -3.214036429 | 0.001835478 | 1.617927607  | 0.111142193 | 1.561359734  | 0.124049265 |
| GLIS2   | -0.439504218 | 0.661383644 | -0.58121664  | 0.563362122 | -1.523113208 | 0.133334288 |
| GLIS3   | 0.344758681  | 0.731106042 | -1.127233203 | 0.264318137 | -1.37685499  | 0.17401373  |
| GLMN    | 0.545410667  | 0.586863725 | 1.015490455  | 0.314119001 | 0.05437072   | 0.956832502 |
| GLO1    | 1.350403257  | 0.180381493 | -1.300018457 | 0.198773201 | -0.277834464 | 0.78215833  |
| GLOD4   | 1.379179605  | 0.171366968 | 1.130444683  | 0.262974384 | 1.884893535  | 0.064615251 |
| GLRX    | 0.027376343  | 0.97822213  | -1.09688505  | 0.277256535 | -1.02736214  | 0.308648686 |
| GLRX2   | 0.397364973  | 0.692069464 | -2.635739286 | 0.010769784 | -2.252539043 | 0.028209001 |
| GLRX3   | 0.909102197  | 0.365802357 | 1.46003669   | 0.149713289 | 2.942991128  | 0.004716078 |
| GLRX5   | -3.257710583 | 0.001601412 | -1.056228518 | 0.295274081 | -1.132666941 | 0.262160335 |
| GLS     | 1.472900147  | 0.144378921 | -0.619529865 | 0.538010487 | -1.83728048  | 0.071454123 |
| GLS2    | 2.553769984  | 0.01239411  | 1.298506898  | 0.199288328 | 1.885185596  | 0.064575075 |
| GLT1D1  | -2.853817619 | 0.005395541 | -0.473732173 | 0.637481733 | -0.996686976 | 0.323185807 |
| GLT25D1 | 0.212003473  | 0.832599139 | 3.111023106  | 0.002899041 | 2.793022917  | 0.007124503 |
| GLT25D2 | -1.502658808 | 0.136540459 | -0.285237203 | 0.776485633 | -1.31555874  | 0.193660485 |
| GLT8D1  | 0.408196434  | 0.684130189 | 0.312698838  | 0.755638889 | 0.803055227  | 0.425323933 |
| GLTP    | -3.498457633 | 0.000739132 | -0.437449981 | 0.663421008 | -0.721205337 | 0.473770911 |
| GLTPD1  | -0.351981056 | 0.725701773 | -0.566954417 | 0.572948151 | -0.204604346 | 0.838619972 |
| GLTPD2  | -0.085103341 | 0.932374349 | -3.39714146  | 0.001240325 | -2.191096698 | 0.032604114 |
| GLTSCR1 | -0.266406324 | 0.790555314 | -2.010014625 | 0.049121426 | -1.53403543  | 0.130628039 |
| GLTSCR2 | 1.103559806  | 0.272820645 | 0.707519086  | 0.482097091 | 1.081334265  | 0.284163727 |
| GLUD1   | 1.340840312  | 0.183455207 | 1.712550906  | 0.092174476 | 1.261837169  | 0.212215923 |
| GLUL    | -4.188724805 | 6.69E-05    | 0.347261091  | 0.729660906 | -0.812551293 | 0.419901867 |
| GLYCTK  | 1.475608955  | 0.14365121  | 0.06108996   | 0.951499055 | 0.527745921  | 0.599751876 |
| GLYR1   | -2.880669573 | 0.004993547 | 0.350570975  | 0.727189175 | 0.426989277  | 0.671017471 |
| GM2A    | -3.179259449 | 0.002044332 | 0.71620859   | 0.476756502 | 1.108757722  | 0.272253944 |
| GMCL1   | 0.075768037  | 0.939777229 | -1.926695678 | 0.058956286 | -3.308123618 | 0.001641726 |
| GMDS    | -1.782993168 | 0.078067685 | 2.783370021  | 0.007264269 | 3.333526018  | 0.00152166  |
| GMEB1   | -0.506150471 | 0.614028457 | 1.213097253  | 0.230044438 | 1.215602621  | 0.229214817 |
| GMEB2   | 0.708233318  | 0.480689536 | 1.07763536   | 0.285689302 | 1.855562415  | 0.068759343 |
| GMFB    | 0.069785624  | 0.944524099 | -0.746889583 | 0.458168369 | -1.333899008 | 0.187614054 |
| GMFG    | -0.221184692 | 0.825465805 | -0.94631706  | 0.347940214 | -0.640083835 | 0.524717455 |
| GMIP    | -0.720055948 | 0.473416458 | -0.836976706 | 0.406065066 | -0.883159841 | 0.380909753 |

|          |              |             |              |             |              |             |
|----------|--------------|-------------|--------------|-------------|--------------|-------------|
| GMNN     | -0.53528832  | 0.59381321  | 0.196361532  | 0.845018404 | 0.106708062  | 0.915400342 |
| GMPPA    | -0.288782568 | 0.773433252 | -0.221601024 | 0.825408294 | 0.768195938  | 0.445584665 |
| GMPPB    | 1.734486385  | 0.086365839 | -0.669213241 | 0.506033204 | -0.484592368 | 0.629847665 |
| GMPR     | -3.999281287 | 0.000132752 | 1.819920478  | 0.07396883  | 0.901456666  | 0.371190157 |
| GMPR2    | -1.438901177 | 0.15375883  | 0.866066829  | 0.39004693  | 0.018028823  | 0.985679672 |
| GMPS     | 1.905087504  | 0.060064981 | 2.261338018  | 0.027530913 | 2.970714839  | 0.00436377  |
| GNA11    | 1.632729344  | 0.106132417 | -0.116311791 | 0.907810044 | 0.752291408  | 0.455013196 |
| GNA12    | -1.618658723 | 0.109132694 | 1.467350785  | 0.14772026  | 1.493217766  | 0.140969784 |
| GNA13    | -0.250906138 | 0.802477032 | -0.546443945 | 0.5868715   | -1.89967164  | 0.062608754 |
| GNA15    | -1.108888207 | 0.270527756 | 0.101320189  | 0.919648185 | -0.415849772 | 0.679102573 |
| GNAI1    | 2.062251757  | 0.042160132 | 0.70269332   | 0.485077377 | -0.039730604 | 0.968448616 |
| GNAI2    | -2.51940566  | 0.013578271 | 0.224571419  | 0.823107492 | 0.140040159  | 0.889128624 |
| GNAI3    | -2.458673281 | 0.015921813 | 0.034745773  | 0.972402599 | -0.472091398 | 0.638688321 |
| GNAL     | -0.599896761 | 0.550130974 | -0.018319423 | 0.985447347 | 0.637002528  | 0.526707927 |
| GNAO1    | -1.07014541  | 0.287507458 | -0.77635908  | 0.440713577 | -0.188895101 | 0.850855088 |
| GNAQ     | -0.170624447 | 0.8649144   | -2.227025486 | 0.029869481 | -3.906944567 | 0.000253293 |
| GNAS     | -2.319207673 | 0.022721878 | 0.356969309  | 0.722419347 | 0.895127014  | 0.37453456  |
| GNAT2    | -0.427312578 | 0.67020513  | -1.396919125 | 0.167797112 | -1.033432842 | 0.305825191 |
| GNAZ     | -4.358464619 | 3.57E-05    | 1.672699412  | 0.09981048  | 0.911313605  | 0.36602006  |
| GNB1     | -2.447676925 | 0.016382897 | -0.442729562 | 0.65961965  | -0.722439139 | 0.473018191 |
| GNB1L    | 0.163115547  | 0.870804941 | 0.729486427  | 0.468660507 | 0.49564472   | 0.622076506 |
| GNB2     | -1.914904079 | 0.058783502 | -0.572529317 | 0.569191663 | -1.165747939 | 0.248636847 |
| GNB2L1   | 0.48261472   | 0.630578832 | 1.509159799  | 0.136724463 | 1.857360339  | 0.068499018 |
| GNB3     | -0.034530358 | 0.972533165 | -1.47660496  | 0.145228463 | 0.470172697  | 0.640049945 |
| GNB4     | -1.40995429  | 0.16211053  | -0.496626189 | 0.6213429   | -2.388303787 | 0.020308158 |
| GNB5     | 0.353251789  | 0.724752351 | 1.029634981  | 0.307485898 | 1.237945768  | 0.220879556 |
| GNE      | 0.27044894   | 0.787454056 | 0.878021234  | 0.383580228 | 1.373996789  | 0.174894531 |
| GNG10    | -0.588844954 | 0.557487801 | -0.593793078 | 0.554975517 | -1.461474533 | 0.149450738 |
| GNG11    | -5.484206149 | 4.00E-07    | 1.601889142  | 0.114650998 | 0.794309367  | 0.430354596 |
| GNG2     | -2.157994518 | 0.033677523 | -1.593145715 | 0.116601191 | -0.88412628  | 0.380392382 |
| GNG5     | -2.578382694 | 0.011604051 | -2.702060821 | 0.009038069 | -2.750662323 | 0.00798653  |
| GNG7     | 0.062650943  | 0.950187866 | -0.883972217 | 0.380386318 | -0.114290281 | 0.909414758 |
| GNGT2    | 0.02217513   | 0.982358927 | 0.290552505  | 0.772437215 | 0.520706995  | 0.604615132 |
| GNL1     | 0.244840069  | 0.807155585 | 1.876283708  | 0.065686187 | 2.446095285  | 0.017594358 |
| GNL2     | 2.022481569  | 0.04619113  | 2.959746341  | 0.004463429 | 3.285270475  | 0.00175734  |
| GNL3     | 2.193921073  | 0.030900961 | 0.930334365  | 0.356081042 | 0.91975407   | 0.361629774 |
| GNL3L    | -2.636639176 | 0.009912126 | 1.452252918  | 0.151857359 | 1.926870698  | 0.059053973 |
| GNLY     | 0.773246601  | 0.441467808 | -0.237925564 | 0.812783211 | 0.624216101  | 0.535009841 |
| GNMT     | 1.619403708  | 0.108972148 | -0.487562095 | 0.627710766 | 0.141390817  | 0.88806649  |
| GNN      | 1.694802377  | 0.093681889 | -0.248750052 | 0.804438987 | 0.77400077   | 0.442172217 |
| GNPAT    | 1.036860792  | 0.30266785  | 1.34265524   | 0.184651439 | 2.047950948  | 0.045244973 |
| GNPDA1   | 0.029893452  | 0.976220349 | 2.775132509  | 0.007428163 | 2.451144398  | 0.017373504 |
| GNPDA2   | 1.320576507  | 0.19009856  | -0.781993081 | 0.43742164  | -0.664162828 | 0.509300153 |
| GNPNAT1  | 1.988321853  | 0.049912754 | 0.554394944  | 0.58145496  | 2.637185757  | 0.010789286 |
| GNPTAB   | 1.539999619  | 0.127182039 | -0.845015403 | 0.401598818 | -1.018088068 | 0.312996151 |
| GNPTG    | -1.080012992 | 0.2831149   | 0.9815004    | 0.33045099  | 0.803757659  | 0.424921425 |
| GNRH1    | 3.036105118  | 0.003159823 | -0.149373346 | 0.881780853 | 1.128600417  | 0.263858085 |
| GNRHR    | 0.159021711  | 0.874019547 | -1.65903735  | 0.102544597 | -1.666968205 | 0.101081178 |
| GNRHR2   | -0.893196095 | 0.374210926 | -2.19151368  | 0.032472625 | -0.574498847 | 0.567921378 |
| GNS      | -1.771683049 | 0.079941038 | 1.885867134  | 0.064358952 | 1.456006891  | 0.150951114 |
| GOLGA1   | 1.113691716  | 0.268472285 | -0.147410719 | 0.883322657 | 0.87549056   | 0.385031121 |
| GOLGA2   | -1.271464346 | 0.206944847 | 0.220002447  | 0.826647156 | 0.284569477  | 0.777019274 |
| GOLGA2B  | 2.105143263  | 0.038155773 | 0.491159294  | 0.625180157 | 0.750887575  | 0.455850924 |
| GOLGA3   | 1.370220269  | 0.174136044 | 2.222796489  | 0.030169512 | 2.293543519  | 0.02557562  |
| GOLGA4   | 0.996854272  | 0.321593817 | 1.035461539  | 0.304781389 | -0.036166583 | 0.971277605 |
| GOLGA5   | -0.90845259  | 0.366143397 | 1.038644409  | 0.303310862 | 0.902564255  | 0.370606902 |
| GOLGA6L5 | 2.722772702  | 0.007817964 | -1.264818341 | 0.211030215 | -1.300117529 | 0.198864121 |
| GOLGA7   | -0.95439439  | 0.34252265  | -2.944483592 | 0.004658806 | -3.083151457 | 0.003171424 |
| GOLGA7B  | 2.979891916  | 0.003735429 | 0.518531761  | 0.606073786 | 1.261349594  | 0.212390174 |
| GOLGA8A  | 2.583351961  | 0.011450165 | -0.977177833 | 0.332567687 | 0.576517184  | 0.566566134 |
| GOLGA8B  | 1.967095943  | 0.052351795 | 0.276660123  | 0.783031509 | 0.592959494  | 0.555585409 |
| GOLGB1   | -2.202659923 | 0.0302566   | 1.670437572  | 0.100258966 | 2.136292529  | 0.037021375 |
| GOLIM4   | 0.191799823  | 0.848344994 | 0.354680834  | 0.724124099 | 0.042175774  | 0.966507963 |
| GOLM1    | -1.019624546 | 0.310727485 | -0.333529271 | 0.739946004 | -0.970846616 | 0.335781913 |
| GOLPH3   | -2.520210983 | 0.013549396 | -0.312386918 | 0.755874686 | -1.585550583 | 0.118448935 |
| GOLPH3L  | 0.409649705  | 0.683067639 | 0.121176188  | 0.903973245 | -0.711215318 | 0.479890482 |
| GOLT1B   | 0.561338697  | 0.576006638 | -0.750879571 | 0.455782046 | -1.175617465 | 0.244700924 |
| GON4L    | 0.071007212  | 0.943554636 | 1.395439712  | 0.168240346 | 1.77056051   | 0.080967232 |
| GOPC     | 1.104758815  | 0.272303518 | -0.880563042 | 0.382213976 | -1.845560389 | 0.070222836 |
| GORAB    | 1.352211864  | 0.179804573 | -0.495585301 | 0.622072698 | -0.906027619 | 0.36878687  |
| GORASP1  | -0.691241713 | 0.491250065 | 0.314672699  | 0.75414729  | -0.344004461 | 0.732125903 |
| GORASP2  | -0.556136689 | 0.579541885 | 0.676836813  | 0.501218859 | 1.075170026  | 0.286889932 |

|         |              |             |              |             |              |              |
|---------|--------------|-------------|--------------|-------------|--------------|--------------|
| GOSR1   | -1.030028748 | 0.305845424 | -0.462187122 | 0.645688328 | -0.300502563 | 0.764901963  |
| GOSR2   | 1.565416073  | 0.121107827 | -0.433243784 | 0.666455901 | -0.464599666 | 0.644011947  |
| GOT1    | 1.284271027  | 0.202449181 | 3.707043153  | 0.000472873 | 4.124834998  | 0.000123666  |
| GOT2    | -0.755700725 | 0.451865458 | 1.459081229  | 0.149975192 | 2.032860415  | 0.046797634  |
| GP1BA   | 0.780805278  | 0.437031857 | 1.055688752  | 0.295518582 | 1.46151028   | 0.149440967  |
| GP5     | -0.327709437 | 0.74391697  | 1.337157212  | 0.186428469 | 0.80954517   | 0.421613776  |
| GP6     | -3.111696193 | 0.002514894 | 0.599820812  | 0.550978233 | 0.284271205  | 0.777246656  |
| GP9     | -3.689122958 | 0.000390935 | 0.402590377  | 0.68873994  | -0.925046638 | 0.35889422   |
| GPA33   | 4.983310154  | 3.14E-06    | 1.275779035  | 0.207154859 | 1.889673434  | 0.063960379  |
| GPAA1   | -0.056024835 | 0.95545021  | -0.024081566 | 0.980870786 | -0.011829867 | 0.99060322   |
| GPAM    | 0.112135605  | 0.91097365  | 0.075006457  | 0.940469487 | -0.405189043 | 0.68687586   |
| GPANK1  | -2.195504438 | 0.03078333  | -1.092523785 | 0.279151676 | -1.146962729 | 0.256253486  |
| GPAT2   | 1.781388412  | 0.078331255 | 0.222662172  | 0.824586175 | 1.254820434  | 0.214733821  |
| GPATCH1 | 0.805233123  | 0.422875673 | 0.81510988   | 0.418367239 | 1.825173828  | 0.073287142  |
| GPATCH2 | 1.184022579  | 0.239622012 | -0.687106043 | 0.49477332  | -0.960795061 | 0.340768173  |
| GPATCH3 | -1.166946875 | 0.246413543 | 3.225454863  | 0.00207474  | 2.806998214  | 0.006859481  |
| GPATCH4 | 0.960546483  | 0.339436507 | 2.615657193  | 0.011350961 | 3.093712777  | 0.003076692  |
| GPATCH8 | 0.352402452  | 0.725386882 | -1.228297675 | 0.22433084  | -1.032361887 | 0.306322013  |
| GPBAR1  | -1.536950802 | 0.127926592 | 0.335134311  | 0.738741325 | -0.0506188   | 0.959808645  |
| GPBP1   | 0.014541841  | 0.988430922 | 0.672526901  | 0.503937538 | -0.149329005 | 0.881828267  |
| GPBP1L1 | -0.923508285 | 0.358291121 | -0.169300393 | 0.86615357  | -0.904991188 | 0.3693030925 |
| GPC1    | 0.371521241  | 0.711150655 | 0.545949776  | 0.587208939 | 0.950487461  | 0.345931768  |
| GPC2    | 2.389716632  | 0.01901597  | -1.240934956 | 0.219660487 | -1.482502416 | 0.143789139  |
| GPC4    | -0.622627226 | 0.53515459  | 1.759441642  | 0.083813098 | 1.810906313  | 0.075497865  |
| GPCPD1  | -0.582515145 | 0.561723181 | -0.274036934 | 0.785036657 | -0.197293718 | 0.844309052  |
| GPD1    | 1.423134864  | 0.158265476 | -0.244790088 | 0.80748899  | -0.46593808  | 0.643059482  |
| GPD1L   | 1.019284571  | 0.310887893 | 0.043845417  | 0.965179279 | 0.063993467  | 0.949202357  |
| GPD2    | -0.383286637 | 0.702440199 | -0.157728022 | 0.875222788 | -1.398344371 | 0.167500044  |
| GPER    | 1.192205124  | 0.236415573 | 0.218472638  | 0.827833138 | 1.478809032  | 0.144771145  |
| GPHN    | 0.886472951  | 0.377801316 | 0.831367129  | 0.409199668 | 1.045721204  | 0.300163822  |
| GPI     | -1.278202852 | 0.204570252 | 1.364664094  | 0.177666571 | 1.376636492  | 0.174080944  |
| GPKOW   | -0.442848817 | 0.658971869 | 2.360694512  | 0.021647822 | 3.206030902  | 0.002220528  |
| GPLD1   | -0.403175587 | 0.687806034 | 0.570032752  | 0.57087241  | -0.460433836 | 0.646980344  |
| GPM6A   | -0.364118021 | 0.716651414 | 2.012680589  | 0.048831575 | 0.437363311  | 0.663522934  |
| GPM6B   | 1.580358659  | 0.117645926 | -0.293338953 | 0.770317437 | -0.965299301 | 0.338527769  |
| GPN1    | 0.648785249  | 0.518182436 | 0.3288423    | 0.743467595 | 1.997303643  | 0.050639112  |
| GPN2    | -0.124967566 | 0.900836912 | -2.044198954 | 0.045514993 | -1.329092593 | 0.189184628  |
| GPN3    | 0.348141936  | 0.728572753 | -0.429332284 | 0.669283201 | -0.482194746 | 0.631539095  |
| GPNUMB  | 0.482319576  | 0.630787604 | 2.318936945  | 0.02396805  | 1.952235318  | 0.055895406  |
| GPR107  | -1.726044691 | 0.087881523 | 0.790450997  | 0.432507058 | 0.87742747   | 0.383987619  |
| GPR108  | -1.572177362 | 0.119531455 | -1.599663605 | 0.115144881 | -1.749743104 | 0.085617627  |
| GPR113  | 1.095730374  | 0.276214239 | -0.529360581 | 0.598589806 | -0.296231909 | 0.768144197  |
| GPR114  | 0.165691692  | 0.868783182 | -2.780850772 | 0.007314036 | -1.726025662 | 0.089833672  |
| GPR124  | 1.072934963  | 0.28626097  | -0.545388729 | 0.587592156 | -0.509294744 | 0.612538316  |
| GPR125  | 1.758415527  | 0.082185814 | 0.497041741  | 0.621051651 | -0.081710907 | 0.93516673   |
| GPR126  | 1.138622492  | 0.257979538 | 0.279562725  | 0.780814504 | -0.718129153 | 0.475650577  |
| GPR128  | -1.240700793 | 0.218044453 | -0.807166316 | 0.422891447 | -1.177059453 | 0.244129646  |
| GPR132  | 0.591378844  | 0.555796777 | -1.237703591 | 0.220847831 | -0.307182758 | 0.759838927  |
| GPR133  | 2.896059314  | 0.004775757 | 1.155334876  | 0.252723791 | 0.742464112  | 0.460896244  |
| GPR137  | -1.247672023 | 0.215491819 | -1.15071915  | 0.254602807 | -0.653854889 | 0.515870172  |
| GPR137B | 0.356535608  | 0.722300859 | -0.91569026  | 0.363647366 | -2.852790778 | 0.006053508  |
| GPR141  | -2.026643187 | 0.045754397 | -1.215605086 | 0.229094536 | -1.680201476 | 0.098465501  |
| GPR146  | -2.819696143 | 0.005949216 | -0.101240536 | 0.919711134 | -0.50636715  | 0.614578428  |
| GPR15   | 0.601745164  | 0.548905317 | -0.333327277 | 0.740097659 | -2.017784425 | 0.048394554  |
| GPR150  | 0.84678761   | 0.399431802 | -3.437878771 | 0.001095457 | -3.249278926 | 0.001955121  |
| GPR152  | 2.336471575  | 0.021759833 | 0.217078153  | 0.828914562 | 0.10500109   | 0.916748559  |
| GPR153  | 0.816022743  | 0.41671095  | -0.85941573  | 0.393674102 | -0.470419353 | 0.639874833  |
| GPR155  | 1.417070469  | 0.160025774 | -0.229847827 | 0.81902436  | -1.405103289 | 0.165490687  |
| GPR157  | -0.556342056 | 0.579402123 | -2.051784025 | 0.044746544 | -1.538997399 | 0.12941313   |
| GPR160  | -2.51930677  | 0.013581821 | -0.564239971 | 0.574781564 | -0.988663711 | 0.327062523  |
| GPR162  | -1.383569406 | 0.170022506 | -2.356453555 | 0.021873957 | -1.361557846 | 0.178767625  |
| GPR171  | 0.548929574  | 0.584456833 | -1.464074528 | 0.148610425 | -1.446306418 | 0.153641995  |
| GPR172A | 0.220272984  | 0.82617351  | 0.401019475  | 0.689889648 | 0.028334264  | 0.977495865  |
| GPR172B | 0.614934789  | 0.540199404 | 0.858947461  | 0.393930259 | 0.293237487  | 0.770420021  |
| GPR174  | 0.667530899  | 0.506196101 | -1.538930316 | 0.129297498 | -2.055226519 | 0.044512457  |
| GPR18   | 0.171729865  | 0.864047864 | -4.426156494 | 4.33E-05    | -3.405359341 | 0.001225495  |
| GPR180  | 1.993052897  | 0.049382523 | -0.059873122 | 0.95246395  | -1.369492834 | 0.176289427  |
| GPR183  | 1.988643072  | 0.0498766   | -0.973304319 | 0.334472107 | -0.516640688 | 0.607432833  |
| GPR19   | 1.56901191   | 0.120267422 | -1.706513265 | 0.09329944  | -0.438817993 | 0.66247476   |
| GPR20   | 0.524244146  | 0.601438978 | -0.880465284 | 0.382266465 | -0.854081919 | 0.396683209  |
| GPR25   | 0.29542715   | 0.768369992 | -2.867425382 | 0.005772261 | -2.807041886 | 0.006858667  |
| GPR27   | 0.3305757    | 0.741758076 | -1.611405141 | 0.112558505 | -2.823834327 | 0.006552294  |

|         |              |             |              |             |              |             |
|---------|--------------|-------------|--------------|-------------|--------------|-------------|
| GPR34   | 0.063653366  | 0.949391945 | -1.397013908 | 0.167768746 | -2.108893405 | 0.039419843 |
| GPR35   | 0.652046353  | 0.516086546 | 1.855961549  | 0.068577382 | 2.108717693  | 0.039435651 |
| GPR44   | 0.184555982  | 0.854005911 | 3.891093743  | 0.000261397 | 2.340553766  | 0.022827113 |
| GPR55   | 0.241003209  | 0.810118463 | 2.190475591  | 0.032551633 | 2.568169142  | 0.012906713 |
| GPR56   | 0.904486355  | 0.368230024 | -1.853538447 | 0.068929169 | -0.909374501 | 0.367033485 |
| GPR65   | -0.995919563 | 0.322045204 | -1.273023776 | 0.208124009 | -1.674762392 | 0.099533791 |
| GPR68   | 0.516401995  | 0.606880965 | -3.26711679  | 0.001833734 | -1.941178971 | 0.057254004 |
| GPR75   | 0.242986343  | 0.80858671  | -2.359514548 | 0.021710529 | -1.194807634 | 0.237176933 |
| GPR77   | -1.344593689 | 0.182244126 | -1.996091443 | 0.050659381 | -2.692211493 | 0.009333804 |
| GPR82   | 1.094016131  | 0.276961153 | -1.192605295 | 0.237914105 | -1.164793204 | 0.24901999  |
| GPR84   | -1.70751536  | 0.09128499  | -0.214292776 | 0.831075618 | -1.192841008 | 0.237940191 |
| GPR89A  | 1.06400408   | 0.290264771 | -0.897110535 | 0.373394535 | -1.426426915 | 0.159273366 |
| GPR89B  | 0.515658541  | 0.607398037 | -2.486682506 | 0.015815075 | -3.911830155 | 0.000249304 |
| GPR97   | -4.141750363 | 7.94E-05    | -0.163089151 | 0.871019126 | 0.116019985  | 0.908050015 |
| GPRASP1 | 3.611747428  | 0.000507541 | 1.437176213  | 0.156078457 | 2.608838322  | 0.011617377 |
| GPRC5B  | 0.68022637   | 0.498163417 | 1.990909374  | 0.051242272 | 1.146957503  | 0.256255628 |
| GPRC5C  | 0.36040089   | 0.719418997 | -0.364088285 | 0.717125284 | 0.701640168  | 0.485797233 |
| GPRC5D  | 0.483444887  | 0.629991771 | -0.39337815  | 0.695492602 | 0.859019888  | 0.393976404 |
| GPRIN1  | 0.061718669  | 0.950928134 | 1.528960983  | 0.131747942 | 1.166250998  | 0.248435136 |
| GPRIN3  | 0.413909357  | 0.679956908 | -1.190000594 | 0.238928219 | -2.237414349 | 0.029239298 |
| GPS1    | -0.82322025  | 0.412628752 | 0.65031217   | 0.51807627  | 1.048066117  | 0.299091701 |
| GPS2    | -2.305215213 | 0.023529008 | -1.745924678 | 0.08615616  | -1.010018126 | 0.316812683 |
| GPSM1   | 1.864598011  | 0.065602253 | 0.058454443  | 0.953588984 | 0.491758843  | 0.624803887 |
| GPSM2   | -1.420693463 | 0.158972334 | 0.70775544   | 0.481951387 | 0.439466908  | 0.662007402 |
| GPSM3   | -2.388077562 | 0.019095618 | 0.335738357  | 0.738288123 | 0.2553591    | 0.799377398 |
| GPT     | 1.938060594  | 0.055851826 | -1.127822426 | 0.26407123  | -1.381616646 | 0.172553909 |
| GPT2    | -0.51831402  | 0.605552071 | 2.968526891  | 0.004354509 | 1.838593451  | 0.071257671 |
| GPX1    | -2.00662339  | 0.04788821  | -0.430230386 | 0.668633609 | -0.562258074 | 0.576174593 |
| GPX2    | 0.190058991  | 0.849704705 | 1.224895401  | 0.225600574 | 1.508293923  | 0.137077144 |
| GPX3    | -5.065023962 | 2.26E-06    | 0.042463323  | 0.966276215 | 1.479859255  | 0.144491374 |
| GPX4    | -0.445829999 | 0.656825188 | -0.147646735 | 0.883137223 | 0.085698681  | 0.932010335 |
| GPX7    | 0.775884804  | 0.439916557 | -1.525402997 | 0.13263138  | -0.97798268  | 0.332271357 |
| GRAMD1A | 0.087018581  | 0.930856281 | -0.987266754 | 0.327641252 | -0.423382708 | 0.673630914 |
| GRAMD1B | -1.653828591 | 0.101758483 | -0.9400218   | 0.351132118 | -1.173247835 | 0.245641801 |
| GRAMD1C | 0.468197849  | 0.640811446 | -1.175328059 | 0.244699314 | -1.424891551 | 0.159714883 |
| GRAMD3  | 1.798922081  | 0.075491094 | -2.156624317 | 0.035222264 | -1.478750888 | 0.144786646 |
| GRAMD4  | -0.893917076 | 0.373827176 | 1.051904972  | 0.297236451 | -0.053406451 | 0.957597334 |
| GRAP    | 1.071360287  | 0.286964143 | 2.882219609  | 0.005541029 | 3.783604561  | 0.000376987 |
| GRAP2   | -1.912779065 | 0.059058931 | -0.179620943 | 0.858080591 | -0.036744204 | 0.970819085 |
| GRAPL   | 1.885490534  | 0.062693766 | 1.174214819  | 0.245141244 | 1.292515026  | 0.201464382 |
| GRASP   | 1.354155402  | 0.179186169 | 0.356501563  | 0.72276767  | 0.500121154  | 0.618941224 |
| GRB10   | -3.010091477 | 0.003415133 | 1.929621661  | 0.058584391 | 0.820267093  | 0.415527162 |
| GRB14   | -1.602416676 | 0.112680415 | -0.084516834 | 0.932938605 | -1.74773802  | 0.085967583 |
| GRB2    | -2.540388683 | 0.01284369  | 1.532240772  | 0.130937731 | 1.236268099  | 0.122149757 |
| GREB1   | -0.667749608 | 0.506057135 | 2.350258202  | 0.022208095 | 1.486038429  | 0.241853897 |
| GREM2   | 0.445543266  | 0.657031533 | 1.070407829  | 0.288900968 | -0.233671593 | 0.816088476 |
| GRHL1   | -0.377772118 | 0.706517983 | 0.080617704  | 0.936025463 | -0.005409979 | 0.995702628 |
| GRHPR   | -0.756411295 | 0.451441658 | 0.500723615  | 0.61847379  | 0.274766927  | 0.784502226 |
| GRID2IP | 1.661474671  | 1.00209924  | -1.109976533 | 0.271621867 | 0.318803539  | 0.751056584 |
| GRIK4   | 0.641263001  | 0.523033953 | -1.756166054 | 0.084375981 | -1.192521882 | 0.238064214 |
| GRIK5   | -1.140935149 | 0.257021064 | 1.027241273  | 0.308601694 | 0.39651064   | 0.693228979 |
| GRIN2C  | -0.453661566 | 0.651199604 | -0.769220772 | 0.444905338 | 0.985667617  | 0.328518109 |
| GRIN2D  | -0.541528935 | 0.589524191 | 0.057142161  | 0.954629729 | -0.167403263 | 0.867653285 |
| GRIN3A  | -0.502694943 | 0.616446173 | 0.31952098   | 0.750487565 | 0.318361024  | 0.751390415 |
| GRIN3B  | 1.401776643  | 0.164531931 | -3.869300351 | 0.000280611 | -3.700664959 | 0.000490827 |
| GRINA   | -1.996258027 | 0.049026047 | -0.773909704 | 0.442149276 | -1.087986307 | 0.281242043 |
| GRINL1A | 0.141831286  | 0.887540484 | -2.761649507 | 0.007703779 | -3.570892021 | 0.000737333 |
| GRIP1   | 0.856932799  | 0.393831255 | -0.396375727 | 0.693292592 | 0.4613216    | 0.646347274 |
| GRIP2   | -1.816239402 | 0.072770436 | 1.403284056  | 0.165900428 | 0.639257304  | 0.525250992 |
| GRIPAP1 | -0.942474957 | 0.348553687 | 1.86916692   | 0.066686727 | 1.914201524  | 0.060687789 |
| GRK4    | 0.994520092  | 0.32272182  | -2.458962412 | 0.016960695 | -2.385401579 | 0.020453842 |
| GRK5    | -3.429863737 | 0.000924604 | 1.116665477  | 0.268774167 | -0.14875193  | 0.882281512 |
| GRK6    | -1.348649453 | 0.180942266 | 0.604054384  | 0.548179458 | 1.173276453  | 0.245630423 |
| GRM2    | 2.486712152  | 0.014798231 | -1.57680234  | 0.120318171 | -0.597056733 | 0.552865834 |
| GRN     | -2.278476244 | 0.025142048 | 2.085690704  | 0.041447213 | 1.665060014  | 0.101462997 |
| GRPEL1  | 0.096220063  | 0.923566617 | 0.626742291  | 0.533304596 | 2.321292398  | 0.023919709 |
| GRPEL2  | 0.620729128  | 0.536397142 | 0.090560006  | 0.928156418 | -0.25600094  | 0.798884228 |
| GRSF1   | 0.79382835   | 0.429450579 | 2.959881966  | 0.004461727 | 3.749991575  | 0.000419684 |
| GRTP1   | -0.180968601 | 0.85681223  | -0.268931351 | 0.788943518 | 0.544785334  | 0.588055143 |
| GRWD1   | 0.832620277  | 0.407333812 | 3.398519415  | 0.001235141 | 2.58342228   | 0.012408629 |
| GSDMA   | -0.198895392 | 0.84280765  | 0.588073725  | 0.5587817   | -0.279035494 | 0.781241178 |
| GSDMB   | 2.416562051  | 0.017752873 | 0.601682278  | 0.549746747 | 1.28750466   | 0.203191929 |

|           |              |             |              |             |              |             |
|-----------|--------------|-------------|--------------|-------------|--------------|-------------|
| GSDMD     | -1.141507757 | 0.256784138 | 0.664191861  | 0.509217832 | 0.541888078  | 0.590036314 |
| GSG2      | 0.127734588  | 0.89865317  | 0.367506193  | 0.714588467 | 0.663708539  | 0.509588755 |
| GSK3A     | -1.6021076   | 0.112748812 | -1.237464476 | 0.22093588  | -0.999910657 | 0.321636872 |
| GSK3B     | -2.189113012 | 0.031260569 | -1.130439339 | 0.262976616 | -1.853582596 | 0.069046969 |
| GSN       | -2.37840255  | 0.019571828 | 1.554202329  | 0.125614264 | 1.364093702  | 0.177972768 |
| GSPT1     | -3.245414631 | 0.001664316 | 1.760504787  | 0.083631077 | 0.99528645   | 0.323860295 |
| GSPT2     | 1.386919297  | 0.169001958 | 1.725322419  | 0.089831646 | 1.670603691  | 0.10035699  |
| GSR       | -1.902512278 | 0.060405033 | 2.044539118  | 0.045480288 | 1.361997724  | 0.178629552 |
| GSS       | 0.586182745  | 0.559267201 | 1.890799781  | 0.063684718 | 2.937757802  | 0.004785479 |
| GSTA4     | 1.421650372  | 0.158694991 | 0.952548303  | 0.344799473 | 0.882810172  | 0.381097053 |
| GSTCD     | 0.110519439  | 0.912251438 | -1.891584982 | 0.063577944 | -1.321415294 | 0.191713925 |
| GSTK1     | 0.212410755  | 0.8322824   | 0.427473361  | 0.670628553 | 0.682399342  | 0.497787777 |
| GSTM1     | -0.739480051 | 0.461601889 | 0.318053857  | 0.751594419 | 0.348876031  | 0.728485238 |
| GSTM2     | 1.450292206  | 0.150565039 | 0.202195723  | 0.840476216 | 0.997525301  | 0.322782524 |
| GSTM3     | 1.805389357  | 0.074465322 | 0.527139313  | 0.600121452 | 2.184034524  | 0.033146023 |
| GSTM4     | 1.454718201  | 0.149338057 | 2.275285585  | 0.026627617 | 1.12298073   | 0.266217066 |
| GSTO1     | -0.866991069 | 0.388326691 | 0.764868665  | 0.447472395 | 0.227339058  | 0.820984564 |
| GSTO2     | -0.915423923 | 0.362494022 | 1.098812811  | 0.276421719 | -0.046824185 | 0.962819241 |
| GSTP1     | -1.043450385 | 0.299624272 | 1.107374503  | 0.272735344 | 1.573546815  | 0.121201908 |
| GSTT1     | -0.203792478 | 0.838990579 | -1.384661238 | 0.17149686  | -1.261790605 | 0.21223256  |
| GSTZ1     | -0.306365591 | 0.760056703 | 2.431587806  | 0.018164836 | 2.049427514  | 0.045095472 |
| GTDC1     | 0.022319352  | 0.982244213 | -1.346923337 | 0.18328083  | -1.640824975 | 0.106415648 |
| GTF2A1    | -0.126092659 | 0.899948891 | -0.535070623 | 0.594660899 | -1.449998231 | 0.152613516 |
| GTF2A2    | -0.115519176 | 0.908299263 | -2.833025325 | 0.006344859 | -1.778723672 | 0.080690251 |
| GTF2B     | -0.281868593 | 0.778712224 | -1.253213129 | 0.215191822 | -1.243718636 | 0.218762671 |
| GTF2E1    | -0.36044637  | 0.719385112 | -0.118960616 | 0.905720501 | -1.085841411 | 0.28218182  |
| GTF2E2    | 0.645630122  | 0.520214467 | 0.481262027  | 0.632153658 | 0.547926021  | 0.585911085 |
| GTF2F1    | -1.722483277 | 0.088527478 | 0.947710632  | 0.347236194 | 1.347710557  | 0.183155915 |
| GTF2F2    | 0.378185501  | 0.706212002 | 0.260171207  | 0.795659554 | 0.399090879  | 0.691337748 |
| GTF2H1    | 1.155610014  | 0.250997699 | 1.223515132  | 0.226117191 | 1.955732603  | 0.055471442 |
| GTF2H2    | 0.132774365  | 0.894677781 | 0.304647212  | 0.761732942 | 0.506630579  | 0.61439473  |
| GTF2H2B   | 1.084509515  | 0.281128691 | 0.929267878  | 0.356628613 | 1.020352346  | 0.31193091  |
| GTF2H3    | 1.049431419  | 0.296879811 | -0.10888803  | 0.913669772 | -0.544004599 | 0.588588706 |
| GTF2H4    | 1.064076224  | 0.290232275 | -0.544406468 | 0.588263363 | 0.998935847  | 0.322104729 |
| GTF2H5    | 0.790482494  | 0.431390887 | -2.296431427 | 0.025308211 | -1.137631559 | 0.26009816  |
| GTF2I     | -1.788374244 | 0.077189237 | 1.089779198  | 0.280348932 | 2.032273532  | 0.046858937 |
| GTF2IP1   | -0.580573311 | 0.56302566  | -0.850663217 | 0.398479097 | -2.925186918 | 0.004956082 |
| GTF2IRD1  | 1.509853084  | 0.134696545 | -0.520370373 | 0.604800065 | 0.154381168  | 0.877861917 |
| GTF2IRD2  | 1.143014181  | 0.256161564 | 2.261480345  | 0.02752156  | 3.577144125  | 0.000723141 |
| GTF2IRD2B | 0.59617786   | 0.552601087 | 1.178948413  | 0.243266085 | 3.648610511  | 0.000578369 |
| GTF3A     | 0.322212664  | 0.748062905 | -0.144191921 | 0.885852265 | 1.04708825   | 0.299538473 |
| GTF3C1    | -0.768797903 | 0.444090827 | 1.851243993  | 0.069263681 | 1.878291526  | 0.065529098 |
| GTF3C2    | 0.796628858  | 0.427830498 | 0.464652866  | 0.64393183  | 1.332597729  | 0.188038289 |
| GTF3C3    | 1.894490811  | 0.061474666 | -0.922665586 | 0.360030564 | -0.668092299 | 0.506807504 |
| GTF3C4    | 1.099477071  | 0.274586631 | 1.196083995  | 0.236564578 | 0.924535056  | 0.359158055 |
| GTF3C5    | -0.167413495 | 0.867432396 | 0.923343115  | 0.359680495 | 1.409694074  | 0.164136549 |
| GTF3C6    | -2.496109491 | 0.014437877 | -0.2574308   | 0.79776373  | 0.720494193  | 0.474205074 |
| GTPBP1    | -1.868682873 | 0.065024856 | -0.196590121 | 0.844840337 | -0.252583345 | 0.801511147 |
| GTPBP10   | 0.912327787  | 0.364111928 | -1.448054276 | 0.153023812 | -0.831572719 | 0.409167253 |
| GTPBP2    | -1.806319363 | 0.074318772 | -1.018865699 | 0.312527464 | -2.493102406 | 0.015632633 |
| GTPBP3    | 1.99286329   | 0.049403681 | 1.120950567  | 0.266960958 | 0.955557494  | 0.343385568 |
| GTPBP4    | 0.977851642  | 0.330853141 | 3.363788726  | 0.001372263 | 3.535031866  | 0.000824002 |
| GTPBP5    | -0.341226622 | 0.733753939 | 0.044033084  | 0.965030337 | 0.020442309  | 0.983762892 |
| GTPBP6    | -0.387123511 | 0.699608095 | 0.107028606  | 0.915138222 | 0.784160411  | 0.436236564 |
| GTPBP8    | -0.602783899 | 0.548217145 | 2.090921029  | 0.040957557 | 2.218498131  | 0.03057457  |
| GTSE1     | -0.530222089 | 0.597305749 | 0.312255028  | 0.755974395 | 0.743555542  | 0.460240718 |
| GTSF1     | -0.104883113 | 0.916709466 | -1.627216839 | 0.10915005  | -0.281969754 | 0.779001783 |
| GUCA1B    | 2.147486521  | 0.034529612 | 1.020232344  | 0.3118846   | 2.14032188   | 0.036679634 |
| GUCY1A3   | 0.357169428  | 0.721828022 | -0.245370644 | 0.807041651 | -1.150507326 | 0.254803698 |
| GUCY1B3   | -3.463003022 | 0.000830105 | 0.13231882   | 0.895193293 | -0.401606139 | 0.689496044 |
| GUCY2C    | -1.127512274 | 0.262619281 | -1.228798884 | 0.224144232 | -0.563861667 | 0.575090085 |
| GUCY2D    | 1.165363137  | 0.24705033  | 0.209098545  | 0.835109093 | -0.07625736  | 0.939484996 |
| GUF1      | 1.048701331  | 0.2972139   | -0.467065203 | 0.642215351 | -0.310336462 | 0.757452332 |
| GUK1      | -2.863453166 | 0.005247989 | -0.153963999 | 0.878176326 | -0.744311046 | 0.459787267 |
| GUSB      | -1.043326066 | 0.299681499 | 1.366283116  | 0.177160828 | 2.071149466  | 0.042945077 |
| GUSBP1    | 1.772618225  | 0.079784743 | -0.437382136 | 0.663469916 | -0.534698067 | 0.594966502 |
| GUSBP11   | 2.653203583  | 0.009473669 | -0.482562298 | 0.631235565 | 0.433185693  | 0.666536878 |
| GUSBP2    | 1.12434212   | 0.263953854 | -0.193529554 | 0.847225148 | -1.218075761 | 0.228281035 |
| GUSBP3    | 0.918078647  | 0.361110433 | 0.913453966  | 0.364811836 | 1.167093451  | 0.248097602 |
| GUSBP4    | 0.54610101   | 0.58639117  | -1.970595636 | 0.053583088 | -3.053637904 | 0.003450822 |
| GUSBP5    | -0.030041498 | 0.976102617 | -0.726157959 | 0.470682636 | 0.069806026  | 0.944595686 |
| GVINP1    | 0.19091945   | 0.849032569 | -1.254105361 | 0.214869732 | -1.52483825  | 0.132903927 |



|         |              |             |              |             |              |             |
|---------|--------------|-------------|--------------|-------------|--------------|-------------|
| GXYLT1  | 0.258977991  | 0.796262666 | -0.196196411 | 0.845147037 | -0.931311951 | 0.355673201 |
| GYG1    | -2.013115883 | 0.04718707  | 0.650742654  | 0.517800298 | 0.440234052  | 0.661455068 |
| GYLTL1B | 1.302606121  | 0.196139423 | -0.86534842  | 0.390437707 | -0.038430307 | 0.969480699 |
| GYPA    | -1.790965302 | 0.076769184 | 0.569012464  | 0.57155999  | 0.135864531  | 0.892413551 |
| GYPB    | -1.254953766 | 0.212848942 | -0.094317786 | 0.925184076 | -0.06172377  | 0.951001659 |
| GYPC    | -3.552708135 | 0.000617954 | -0.902408963 | 0.370598132 | -1.495150462 | 0.140465941 |
| GYPE    | -1.76903373  | 0.08038519  | 0.560223802  | 0.57749941  | 1.704893362  | 0.093733387 |
| GYS1    | 0.117775038  | 0.906516805 | 0.341035692  | 0.734317662 | 1.241272378  | 0.219657869 |
| GZF1    | 0.733642174  | 0.465135025 | -0.779651912 | 0.438787814 | -0.362060661 | 0.718663691 |
| GZMA    | 1.352546263  | 0.179698058 | -2.386730024 | 0.020304763 | -1.587656452 | 0.117971201 |
| GZMB    | -0.598583516 | 0.551002606 | -1.734917582 | 0.088104037 | -1.176522854 | 0.24434212  |
| GZMH    | 0.590391888  | 0.556455132 | -2.413834508 | 0.018986277 | -0.838986545 | 0.40502912  |
| GZMK    | 1.574072232  | 0.119092618 | -0.899292331 | 0.372241408 | -0.705926317 | 0.483148196 |
| GZMM    | 0.472359532  | 0.63785037  | -2.539362128 | 0.013828566 | -1.552679084 | 0.126109885 |
| H19     | -1.616287773 | 0.109644905 | -1.008756939 | 0.317310388 | -1.638946009 | 0.106807715 |
| H1F0    | -3.748436767 | 0.000319297 | 0.293419942  | 0.77025585  | -0.690417247 | 0.492771586 |
| H1FNT   | 0.847658866  | 0.39894893  | -3.859134042 | 0.000290031 | -1.183216435 | 0.241701229 |
| H1FX    | -1.335971258 | 0.185035302 | -2.075325813 | 0.042432605 | -2.417065515 | 0.018913876 |
| H2AFJ   | -1.566256271 | 0.120911041 | 0.316424578  | 0.752824225 | 0.385400357  | 0.70139477  |
| H2AFV   | -1.24943759  | 0.214848816 | -1.148556605 | 0.255486579 | 0.008294525  | 0.993411357 |
| H2AFX   | 0.299784823  | 0.765054821 | -1.989359118 | 0.051417764 | -1.763009249 | 0.083331906 |
| H2AFY   | -2.028987848 | 0.045509904 | 2.018159904  | 0.048240472 | 1.714072757  | 0.092022633 |
| H2AFY2  | 0.696791156  | 0.487787127 | 0.006065486  | 0.995181432 | 1.160730535  | 0.250655109 |
| H2AFZ   | -1.050313943 | 0.296476307 | -0.42833053  | 0.670008062 | -0.393949446 | 0.695108196 |
| H3F3B   | -3.985288578 | 0.000139538 | 1.060672935  | 0.293266151 | -0.428221932 | 0.670125181 |
| H3F3C   | 0.195244832  | 0.845655558 | 2.047480638  | 0.045181133 | 0.778612219  | 0.439472114 |
| H6PD    | -1.115369862 | 0.267756767 | 0.989306082  | 0.32665138  | 1.736597143  | 0.087933727 |
| HAAO    | -2.056442903 | 0.042729335 | 0.080217228  | 0.936342567 | -0.826824983 | 0.411830788 |
| HABP4   | 3.179497069  | 0.002042833 | 0.885356794  | 0.379645623 | 2.691208656  | 0.009358637 |
| HACE1   | 1.811615926  | 0.073488702 | -1.595557351 | 0.116060631 | -1.593723124 | 0.116603598 |
| HACL1   | 1.38487057   | 0.169625548 | 1.407735519  | 0.164583801 | 2.553537355  | 0.013401504 |
| HADH    | 0.700713446  | 0.485347664 | 1.505800993  | 0.137583194 | 2.52768588   | 0.014317941 |
| HADHA   | -0.835732276 | 0.405589975 | 3.153153109  | 0.002565129 | 3.609592292  | 0.000653574 |
| HADHB   | -0.70496342  | 0.482712    | 3.343285274  | 0.00145985  | 3.110133468  | 0.002934649 |
| HAGH    | -2.463440475 | 0.015725554 | -0.055213184 | 0.956159706 | -0.736157696 | 0.464694429 |
| HAGHL   | 1.198026296  | 0.234153335 | -1.720982029 | 0.090622277 | -1.76613827  | 0.082800244 |
| HAL     | -3.055667672 | 0.002979612 | -0.217524392 | 0.828568467 | -1.362498696 | 0.178472402 |
| HAPLN3  | 2.565572674  | 0.012009391 | 1.662736852  | 0.101798266 | 1.663486415  | 0.101778752 |
| HAR1A   | 1.453388413  | 0.149705884 | 0.131154093  | 0.896110455 | 0.815167839  | 0.418415232 |
| HARBI1  | -0.219946026 | 0.046458964 | -0.291797381 | 0.771489965 | -0.357968993 | 0.72170666  |
| HARS    | 0.062149317  | 0.950586175 | 2.161462678  | 0.03482916  | 3.201019925  | 0.002253383 |
| HARS2   | -0.60734462  | 0.545200762 | 2.561143213  | 0.013075447 | 2.149186542  | 0.035937495 |
| HAS1    | 0.050020604  | 0.960220382 | -0.893592038 | 0.375258914 | -2.315448408 | 0.024260294 |
| HAS3    | -0.374727543 | 0.708773021 | -1.29198702  | 0.20152172  | 1.339890728  | 0.185670025 |
| HAT1    | -0.032414682 | 0.974215444 | -0.216812775 | 0.8291204   | -0.27008691  | 0.788082077 |
| HAUS1   | 0.25463496   | 0.799604677 | -0.341802707 | 0.73374337  | 0.937174443  | 0.352676283 |
| HAUS2   | 0.124320219  | 0.90134791  | 0.514528231  | 0.608851532 | 1.726894906  | 0.089676178 |
| HAUS3   | 0.547286761  | 0.585579917 | -0.448587164 | 0.655412643 | -0.510234216 | 0.61188429  |
| HAUS4   | -1.137001816 | 0.258652724 | 1.185566148  | 0.24066192  | 0.541690595  | 0.59017147  |
| HAUS5   | 0.98037973   | 0.32961127  | -0.725752935 | 0.470929035 | 0.644476856  | 0.521886493 |
| HAUS6   | 0.664676587  | 0.50801158  | -0.002908371 | 0.997689509 | -1.120936833 | 0.267078719 |
| HAUS7   | 1.278236661  | 0.204558389 | 1.243666613  | 0.218660429 | 1.954806917  | 0.055583391 |
| HAUS8   | -1.41242427  | 0.161384574 | 0.827363527  | 0.41144587  | 1.822335754  | 0.073722512 |
| HAVCR1  | 0.067027637  | 0.946713166 | 0.524024054  | 0.602272597 | -0.027199968 | 0.978396535 |
| HAVCR2  | -0.340750835 | 0.734110871 | 2.98926946   | 0.004106947 | 1.291128864  | 0.201941219 |
| HAX1    | 0.834763596  | 0.406132297 | -0.791487507 | 0.431907045 | -0.025201921 | 0.97998312  |
| HBA1    | -3.238621306 | 0.001700054 | -1.29278943  | 0.201245847 | -1.926261104 | 0.059131719 |
| HBA2    | -3.450660568 | 0.000864183 | -0.155509017 | 0.876963774 | -1.248205197 | 0.217127831 |
| HBB     | -3.280756089 | 0.001489469 | 0.457564847  | 0.648986514 | 0.234354349  | 0.81556103  |
| HBD     | -3.027649498 | 0.003240802 | 0.981604885  | 0.330399936 | 0.68335878   | 0.497186063 |
| HBEGF   | -1.233077746 | 0.220860989 | -0.476965336 | 0.635191591 | -0.486636338 | 0.628407294 |
| HBG1    | -2.747487033 | 0.007296395 | 0.607931216  | 0.54562286  | 0.56721363   | 0.572826363 |
| HBG2    | -1.87150097  | 0.064629007 | 1.520661042  | 0.133816105 | 1.588248799  | 0.117837102 |
| HBM     | -2.174407745 | 0.032383182 | -1.360288508 | 0.179038917 | -2.685936205 | 0.009490197 |
| HBP1    | -0.929389369 | 0.355253335 | 0.422647766  | 0.67412602  | -0.660535697 | 0.511606852 |
| HBQ1    | -2.760531236 | 0.007034104 | -0.156915173 | 0.875860461 | -0.551678665 | 0.583354157 |
| HBS1L   | 1.366095231  | 0.175422349 | 1.343469621  | 0.184389319 | 1.551632227  | 0.126360228 |
| HBXIP   | -1.884885845 | 0.062776396 | -1.847126297 | 0.069867436 | -1.242175767 | 0.219326964 |
| HBZ     | -0.751567525 | 0.45433513  | -0.045117826 | 0.964169458 | -1.111146536 | 0.271233356 |
| HCAR2   | 1.118018249  | 0.266630278 | -0.965818147 | 0.3381731   | -1.426427669 | 0.15927315  |
| HCAR3   | 1.000699795  | 0.319741167 | -0.078998837 | 0.937307377 | -0.935052203 | 0.353759277 |
| HCCS    | -2.779155708 | 0.006674518 | -2.101711933 | 0.039963199 | -1.382767619 | 0.172202461 |

|         |              |             |              |             |              |             |
|---------|--------------|-------------|--------------|-------------|--------------|-------------|
| HCFC1   | -0.371046586 | 0.71150288  | 0.29122051   | 0.771928874 | 0.232943173  | 0.816651293 |
| HCFC1R1 | 0.123633589  | 0.901889963 | -1.435897215 | 0.156440707 | -1.190114751 | 0.23900121  |
| HCFC2   | 1.934557478  | 0.056287215 | -1.775778534 | 0.081052131 | -1.381832938 | 0.172487823 |
| HCG11   | 0.518417456  | 0.605480219 | -1.186386397 | 0.240340549 | -2.799114741 | 0.00700784  |
| HCG18   | 1.072353532  | 0.286520471 | -2.412792856 | 0.019035493 | -1.74305127  | 0.086790213 |
| HCG25   | -1.430438883 | 0.156165199 | 0.341676464  | 0.733837882 | 0.35597175   | 0.723193656 |
| HCG26   | -0.478533686 | 0.633468222 | 0.810632402  | 0.420913754 | 1.618406029  | 0.111170701 |
| HCG27   | -0.640108299 | 0.523780779 | -2.630013446 | 0.010932661 | -2.104179066 | 0.03984591  |
| HCG4    | 1.588356874  | 0.115825619 | 0.129083231  | 0.897741502 | -0.520666979 | 0.604642831 |
| HCK     | -1.380013965 | 0.171110808 | -0.042352499 | 0.966364176 | -0.174926966 | 0.861765298 |
| HCLS1   | -2.455135678 | 0.016068865 | 1.241618269  | 0.219410011 | 1.383459586  | 0.171991435 |
| HCN2    | 0.380810017  | 0.704270499 | -2.291687792 | 0.025599035 | -2.355887603 | 0.021989367 |
| HCN3    | 1.746426988  | 0.084258675 | -2.167848823 | 0.034316192 | -1.621405463 | 0.110524712 |
| HCP5    | -0.267786458 | 0.789496174 | 0.138851117  | 0.89005215  | 0.261519034  | 0.794647712 |
| HCST    | -0.683258104 | 0.49625543  | -2.269816338 | 0.026978648 | -0.867432842 | 0.389391264 |
| HDAC1   | -1.135107592 | 0.259441102 | 1.553874242  | 0.1256925   | 2.397728344  | 0.019841458 |
| HDAC10  | -0.662641218 | 0.509308292 | 0.157024455  | 0.875774725 | 0.756376933  | 0.452580259 |
| HDAC11  | 0.711888206  | 0.478434522 | 1.150896158  | 0.254530565 | 1.514392884  | 0.135526792 |
| HDAC2   | 2.51627804   | 0.01369094  | 2.050339061  | 0.044892062 | 3.049737443  | 0.003489422 |
| HDAC3   | -1.097064335 | 0.275633986 | 2.081321644  | 0.04186013  | 3.068310069  | 0.003309167 |
| HDAC4   | 0.465518357  | 0.642721016 | -1.240208701 | 0.219926934 | -2.759510694 | 0.007798913 |
| HDAC5   | 0.154396243  | 0.877654151 | -0.081132431 | 0.935617907 | 0.252834277  | 0.801318191 |
| HDAC6   | 1.030391668  | 0.305676067 | 1.041631     | 0.301935426 | 1.643888737  | 0.105778873 |
| HDAC7   | 1.800952277  | 0.07516783  | -0.888674078 | 0.37787471  | -0.369538971 | 0.713113931 |
| HDAC8   | 0.096153228  | 0.923619543 | 2.174567797  | 0.033783652 | 1.227014381  | 0.224929289 |
| HDAC9   | 2.867137749  | 0.005192553 | -0.380424677 | 0.705029605 | -1.796305625 | 0.077817803 |
| HDC     | -4.368515227 | 3.44E-05    | 1.514295421  | 0.135419674 | -1.907111805 | 0.061618749 |
| HDDC2   | -0.175533952 | 0.861051455 | -0.612155556 | 0.542844022 | -0.203789927 | 0.839253325 |
| HDDC3   | 0.25273825   | 0.801065393 | 0.400919566  | 0.689962794 | 0.80710451   | 0.423006755 |
| HDGF    | -2.037940224 | 0.044586655 | 1.356128701  | 0.180351074 | 1.451302363  | 0.152251494 |
| HDGFRP2 | -0.1860253   | 0.852857039 | 1.299790743  | 0.198850741 | 1.349574426  | 0.182560514 |
| HDGFRP3 | 1.524814895  | 0.130924536 | -0.33870744  | 0.736061844 | -1.947893216 | 0.056425638 |
| HDHD1   | 0.163571361  | 0.870447155 | 3.16035652   | 0.002511781 | 2.799637168  | 0.006997918 |
| HDHD2   | -0.190140476 | 0.849641049 | 1.157377236  | 0.251895539 | 0.550804034  | 0.583949624 |
| HDHD3   | 0.518673894  | 0.6053021   | 0.982534447  | 0.329945962 | 1.461627269  | 0.149408994 |
| HDLBP   | -2.258392511 | 0.026416876 | 1.345053815  | 0.183880232 | 1.483384119  | 0.143555487 |
| HDX     | -0.597100634 | 0.551987659 | -0.445303235 | 0.657769832 | -1.276593609 | 0.206992284 |
| HEATR1  | 1.124246945  | 0.263993995 | 1.22541402   | 0.225406686 | 1.349979925  | 0.182431175 |
| HEATR2  | 1.770448391  | 0.080147772 | 1.219963309  | 0.227450576 | 0.907467266  | 0.368032004 |
| HEATR3  | 3.22858353   | 0.022194835 | 2.819133705  | 0.006590614 | 3.107028915  | 0.002961024 |
| HEATR4  | 1.312748701  | 0.192712572 | 1.124467017  | 0.265479457 | 0.857423646  | 0.394850144 |
| HEATR5A | -0.261164696 | 0.794581405 | -1.545217967 | 0.127770776 | -3.059673832 | 0.003391874 |
| HEATR5B | 1.581456493  | 0.117394727 | 0.606805196  | 0.546364794 | -0.130409871 | 0.896707529 |
| HEATR6  | 0.28879314   | 0.773425188 | 0.595246839  | 0.554010128 | 0.940133554  | 0.351169828 |
| HEATR7A | 2.521483668  | 0.013503875 | 0.063440141  | 0.949635682 | 0.411974511  | 0.681924228 |
| HEBP1   | -1.755137712 | 0.082748338 | 1.892230606  | 0.063490265 | 1.825111312  | 0.073296708 |
| HEBP2   | -2.12439894  | 0.036467814 | -0.740358908 | 0.462089698 | -0.184381363 | 0.854377575 |
| HECA    | 0.330209157  | 0.742034045 | 1.675136195  | 0.099329146 | 0.834003413  | 0.407807688 |
| HECTD1  | 1.00323272   | 0.318524772 | 2.012383784  | 0.048863772 | 1.365182124  | 0.177632435 |
| HECTD2  | 1.007611013  | 0.316429449 | -1.516762367 | 0.134796424 | -0.886628678 | 0.379054816 |
| HECTD3  | -0.096184799 | 0.923594542 | -0.318860571 | 0.750985738 | 0.475731325  | 0.636108651 |
| HECW2   | -2.341195112 | 0.021502973 | -1.25939165  | 0.212968723 | -2.428321236 | 0.018392057 |
| HEG1    | 1.90639267   | 0.059893255 | -0.018915429 | 0.984973946 | 0.061484857  | 0.951191072 |
| HELB    | 1.389814146  | 0.168123811 | 1.122758829  | 0.2661984   | 1.047992202  | 0.299125455 |
| HELLS   | 2.529055036  | 0.013235896 | -0.551807954 | 0.583214687 | 0.250278901  | 0.803283752 |
| HELQ    | 1.872542048  | 0.064483282 | 0.649024737  | 0.518902075 | 0.33552054   | 0.738480942 |
| HELZ    | 0.561328222  | 0.576013747 | -1.806210544 | 0.076111049 | -2.907691973 | 0.005202922 |
| HEMGN   | -4.793956257 | 6.68E-06    | 0.657402405  | 0.513540872 | 0.198324485  | 0.843506404 |
| HEMK1   | 2.587508065  | 0.011322878 | -0.531030841 | 0.597439301 | 0.151406298  | 0.880197053 |
| HENMT1  | 1.611484948  | 0.110688413 | -0.033404491 | 0.973467523 | 0.515463155  | 0.608249913 |
| HERC1   | 0.771940927  | 0.442236716 | 0.960170949  | 0.340982737 | 0.956247231  | 0.34304013  |
| HERC2   | 2.364941886  | 0.020251917 | -0.327360736 | 0.74458193  | 0.348649691  | 0.72865425  |
| HERC2P2 | 3.16194366   | 0.002156405 | -0.97254062  | 0.334848431 | 0.765300449  | 0.447292611 |
| HERC2P3 | 0.912755112  | 0.363888353 | -1.484343805 | 0.143170154 | -0.765178897 | 0.447364394 |
| HERC2P9 | 1.038937578  | 0.301706382 | -0.908149861 | 0.367583306 | -1.542704632 | 0.128511329 |
| HERC3   | 0.279278819  | 0.780692264 | -0.821922487 | 0.41451055  | -1.297921128 | 0.199612749 |
| HERC4   | 1.210642439  | 0.229304067 | 0.407564908  | 0.685104068 | -0.78899351  | 0.43342956  |
| HERC5   | -1.358686902 | 0.177750563 | 1.828240147  | 0.072693684 | -1.658926173 | 0.102698341 |
| HERC6   | -1.427689936 | 0.156953123 | 1.186661588  | 0.2402328   | -0.472260863 | 0.638568118 |
| HERPUD1 | -1.43798913  | 0.154016796 | 0.296866116  | 0.767636687 | 0.408914336  | 0.684155637 |
| HERPUD2 | -2.434257569 | 0.016961721 | -1.285160537 | 0.203880158 | -1.874264733 | 0.066091839 |
| HES1    | 0.848293838  | 0.398597236 | 0.708298551  | 0.48161667  | -0.729181548 | 0.468916728 |

|           |              |             |              |             |              |             |
|-----------|--------------|-------------|--------------|-------------|--------------|-------------|
| HES4      | 0.140944261  | 0.888239103 | -1.120569908 | 0.267121681 | -2.855938126 | 0.006001464 |
| HES6      | 0.83074505   | 0.408386805 | -1.427254446 | 0.158905771 | -1.752445898 | 0.085147768 |
| HEXA      | 0.27034132   | 0.787536571 | 2.229576048  | 0.029689803 | 2.237705879  | 0.029219129 |
| HEXB      | -0.408153106 | 0.684161877 | 1.050382018  | 0.297929815 | 0.16761685   | 0.867486028 |
| HEXDC     | 0.530592379  | 0.597050158 | 0.274863381  | 0.784404768 | 1.170747959  | 0.246637214 |
| HEXIM1    | -0.818873865 | 0.415090993 | -3.058147586 | 0.003375777 | -2.50923943  | 0.015006176 |
| HEXIM2    | -1.765034858 | 0.081059451 | 2.881073597  | 0.00555863  | 1.480312759  | 0.144370696 |
| HEY1      | -2.045600437 | 0.043809472 | 1.860860193  | 0.067870817 | 0.416854236  | 0.678371954 |
| HFE       | 0.041348875  | 0.967112311 | 0.709589359  | 0.480821675 | 0.412115023  | 0.681821839 |
| HGD       | -2.167642217 | 0.032911362 | 1.35151631   | 0.181814549 | 1.325829479  | 0.190256562 |
| HGF       | 0.164702795  | 0.869559166 | 1.837799727  | 0.071251345 | 0.827538982  | 0.411429553 |
| HGS       | -1.068161659 | 0.288396143 | -0.930771069 | 0.355856981 | -0.64165247  | 0.523705665 |
| HGSNAT    | 0.457795472  | 0.64823823  | -0.454630186 | 0.651084195 | 0.362421183  | 0.71839579  |
| HHAT      | 1.094188477  | 0.276885997 | -0.351384718 | 0.726581939 | 0.088553896  | 0.929751052 |
| HHEX      | -2.189557791 | 0.03122715  | 1.226053411  | 0.225167813 | -0.536081421 | 0.594016438 |
| HHLA2     | 0.94280307   | 0.348386755 | 0.056684725  | 0.954992531 | 1.243765756  | 0.218745455 |
| HHLA3     | 0.150998578  | 0.880325647 | 0.562305811  | 0.576089685 | 1.613854103  | 0.112156895 |
| HIAT1     | -0.108340412 | 0.913974605 | -1.376024424 | 0.174141084 | -2.406730281 | 0.019404687 |
| HIATL1    | -1.275637707 | 0.205471801 | -2.298675779 | 0.025171639 | -3.188017821 | 0.002340778 |
| HIATL2    | -0.022669524 | 0.981965687 | -3.641477131 | 0.000582013 | -3.18968702  | 0.002329383 |
| HIBADH    | -0.597722112 | 0.551574715 | 0.904410738  | 0.369545117 | 1.144770549  | 0.257153056 |
| HIBCH     | 1.889864936  | 0.062098731 | 1.862129283  | 0.067688773 | 1.748155419  | 0.085894635 |
| HIC1      | -1.720084873 | 0.088964681 | -3.446510865 | 0.001066893 | -3.049861826 | 0.003488185 |
| HIC2      | 2.408999551  | 0.018100903 | -0.369833378 | 0.712863047 | 0.112888141  | 0.910521253 |
| HIF1A     | -1.952941243 | 0.05403404  | 0.667506604  | 0.507114368 | -1.595703282 | 0.116159991 |
| HIF1AN    | 0.694181973  | 0.489413627 | 0.81472388   | 0.418586405 | 1.446315139  | 0.153639559 |
| HIGD1A    | -0.187586299 | 0.851636831 | -1.047786796 | 0.29911391  | -0.946563075 | 0.347911077 |
| HIGD2A    | -1.467488627 | 0.145841311 | -1.754541371 | 0.084656332 | -1.667287221 | 0.10101746  |
| HINFP     | 0.663106875  | 0.509011472 | 0.813688851  | 0.419174423 | 1.630447885  | 0.108595645 |
| HINT1     | 0.666570679  | 0.506806459 | -1.217494633 | 0.22838072  | -0.659435166 | 0.512307848 |
| HINT2     | 1.320818213  | 0.19001827  | 0.156629726  | 0.876084412 | 1.93469964   | 0.058063212 |
| HINT3     | -1.426238271 | 0.157370445 | -0.967123359 | 0.337525897 | -1.708429344 | 0.093071313 |
| HIP1      | -1.188313486 | 0.237936694 | 1.515044183  | 0.135230265 | 1.718219471  | 0.091258304 |
| HIP1R     | 1.952555433  | 0.054080528 | 0.323209933  | 0.747706807 | 1.099508963  | 0.276230787 |
| HIPK1     | -0.349309902 | 0.727698909 | 0.562063152  | 0.576253903 | -0.366488889 | 0.715375578 |
| HIPK2     | -1.074475834 | 0.285574041 | 0.387210671  | 0.700027362 | 0.190691184  | 0.849454284 |
| HIPK3     | 0.577785985  | 0.564897835 | -0.865843365 | 0.390168457 | -3.271187875 | 0.001832366 |
| HIRA      | -1.747300043 | 0.084106281 | 1.020151657  | 0.31192253  | 0.558379765  | 0.578801577 |
| HIRIP3    | -0.725886129 | 0.469852625 | 1.081755986  | 0.283869362 | 2.094631228  | 0.040721119 |
| HIST1H1C  | -2.695846908 | 0.008424698 | -1.485658533 | 0.142822767 | 0.040150438  | 0.968115393 |
| HIST1H1D  | -2.440289507 | 0.01669932  | 2.47745391   | 0.016188481 | 2.038800744  | 0.046181024 |
| HIST1H1E  | -2.854514806 | 0.005384739 | 0.839069954  | 0.404899149 | -0.198646197 | 0.843255924 |
| HIST1H2AC | -3.77418886  | 0.000292252 | -1.454610746 | 0.151205367 | -2.837203199 | 0.006317472 |
| HIST1H2AE | -3.949698368 | 0.000158328 | -2.515905007 | 0.014683406 | -2.267583638 | 0.027216158 |
| HIST1H2AG | -1.106183177 | 0.271690085 | -0.264168721 | 0.792592866 | -1.015450945 | 0.314239897 |
| HIST1H2AK | -1.404886729 | 0.16360779  | -1.585505415 | 0.118327146 | -3.018007355 | 0.003818753 |
| HIST1H2BC | -2.847964332 | 0.005487025 | -4.2613524   | 7.62E-05    | -4.634865395 | 2.17E-05    |
| HIST1H2BD | -3.53486804  | 0.000655561 | -2.496923946 | 0.015409802 | -1.986440342 | 0.051865601 |
| HIST1H2BE | -2.374084296 | 0.01978776  | -1.252334297 | 0.215509425 | -1.048391765 | 0.289943019 |
| HIST1H2BG | -3.090173097 | 0.002684804 | -0.513509692 | 0.609559146 | -1.088209995 | 0.281144161 |
| HIST1H2BH | -2.544437795 | 0.012706124 | -1.582256174 | 0.119067359 | -1.551752567 | 0.12633143  |
| HIST1H2BJ | -2.903076021 | 0.004679391 | -0.716258018 | 0.476726219 | -1.646805102 | 0.10517562  |
| HIST1H2BK | -3.641055359 | 0.000459946 | -1.446394327 | 0.153486899 | -3.123434381 | 0.002824122 |
| HIST1H2BO | -1.946734445 | 0.054786051 | -0.607403228 | 0.545970687 | -0.561717468 | 0.576540428 |
| HIST1H3D  | -2.13891896  | 0.035238156 | -0.904417535 | 0.369541545 | -2.15813592  | 0.035201633 |
| HIST1H3H  | -4.599503732 | 1.43E-05    | -0.078474571 | 0.937722558 | -1.256907458 | 0.213982609 |
| HIST1H4D  | -0.99402623  | 0.322960817 | -0.646235189 | 0.520693779 | -0.460739536 | 0.646762318 |
| HIST1H4E  | -2.503920058 | 0.014144382 | 0.233446191  | 0.816242655 | -1.536503265 | 0.130022673 |
| HIST1H4H  | -3.273857498 | 0.001522185 | -0.756763208 | 0.452276301 | -0.971553646 | 0.335433003 |
| HIST2H2AC | 0.151440453  | 0.879978134 | 0.680617901  | 0.498840341 | 0.168105375  | 0.867103494 |
| HIST2H2BE | -4.864877547 | 5.04E-06    | -0.925551655 | 0.358540899 | -1.828115258 | 0.072838197 |
| HIST2H2BF | -1.031064939 | 0.305362051 | -1.816304554 | 0.07452886  | -3.233755697 | 0.002046745 |
| HIST3H2A  | -0.782692832 | 0.435928199 | -1.826422735 | 0.07297065  | -1.078394831 | 0.285461471 |
| HIST4H4   | -0.953278461 | 0.343084396 | -1.886437959 | 0.064280619 | -2.285318562 | 0.026085633 |
| HIVEP1    | -2.17783217  | 0.032118666 | -0.499456391 | 0.619360494 | -1.920202609 | 0.059909156 |
| HIVEP2    | 0.33442844   | 0.738859419 | 1.241450108  | 0.219471633 | 0.732451752  | 0.466934735 |
| HIVEP3    | 1.53509521   | 0.128381432 | -0.79647775  | 0.429025237 | -0.758758681 | 0.451165412 |
| HJURP     | -0.347419343 | 0.729113559 | 0.772937835  | 0.442719697 | 1.921285302  | 0.059769587 |
| HK1       | -2.131461143 | 0.035865166 | 2.375389276  | 0.020880338 | 1.747467631  | 0.086014866 |
| HK2       | -1.370527296 | 0.174040591 | 1.00649921   | 0.318385318 | -0.327226654 | 0.744711422 |
| HK3       | -0.875398222 | 0.383762496 | 1.607396863  | 0.113436097 | 0.911955859  | 0.365684798 |
| HKDC1     | 1.109158519  | 0.270411796 | 2.572458188  | 0.01269908  | 2.616731837  | 0.011381157 |

|           |              |             |              |             |              |             |
|-----------|--------------|-------------|--------------|-------------|--------------|-------------|
| HKR1      | 1.986398443  | 0.050129704 | 1.204468449  | 0.233334758 | 3.159564368  | 0.002543269 |
| HLA-A     | -2.56582598  | 0.012001253 | 2.462699505  | 0.016802009 | 1.046286202  | 0.299905258 |
| HLA-B     | -2.926656059 | 0.004368517 | 2.92817006   | 0.0048764   | 1.588219773  | 0.11784367  |
| HLA-C     | -3.062567825 | 0.002918357 | 2.162847521  | 0.034717355 | 0.044433331  | 0.964716394 |
| HLA-DMA   | -1.628197649 | 0.107091361 | 0.209004695  | 0.835182011 | 0.603766606  | 0.548426627 |
| HLA-DMB   | -0.891856353 | 0.374924676 | -0.570607929 | 0.570484972 | -0.479978314 | 0.633104468 |
| HLA-DOA   | 0.662447387  | 0.509431872 | 1.494895905  | 0.140400693 | 1.944454262  | 0.056848629 |
| HLA-DOB   | -0.849041934 | 0.398183131 | 0.583792562  | 0.561639271 | 1.553876733  | 0.125823968 |
| HLA-DPA1  | -1.046041436 | 0.298433234 | -0.983999427 | 0.329231344 | 0.053269638  | 0.957705854 |
| HLA-DPB1  | -0.621370728 | 0.535976967 | 0.232644981  | 0.816861824 | 0.83821388   | 0.405459191 |
| HLA-DQA1  | -0.837585859 | 0.404553462 | 0.144201571  | 0.88584468  | 1.056914959  | 0.295069563 |
| HLA-DQA2  | -0.731688523 | 0.466320799 | 1.315301832  | 0.193620756 | 1.394298646  | 0.168711769 |
| HLA-DQB1  | -2.322936348 | 0.022510968 | 0.158462421  | 0.874646729 | 0.674023642  | 0.503057478 |
| HLA-DQB2  | 0.234574703  | 0.815088838 | 0.822454279  | 0.414210407 | -0.205270433 | 0.838102053 |
| HLA-DRA   | 0.653687775  | 0.51503331  | -0.56277364  | 0.575773149 | -0.028112234 | 0.977672163 |
| HLA-DRB1  | -1.220445791 | 0.225586454 | 1.421099185  | 0.160679671 | 1.33420126   | 0.187515619 |
| HLA-DRB5  | -0.119158615 | 0.905423817 | 0.316965433  | 0.752415908 | -0.547373609 | 0.586287931 |
| HLA-DRB6  | -0.673558602 | 0.502373629 | -0.131649066 | 0.895720672 | 0.652911335  | 0.516473817 |
| HLA-E     | -2.558740503 | 0.012230758 | 1.497029479  | 0.139845897 | 1.330762381  | 0.188637873 |
| HLA-F     | -1.572331191 | 0.119495781 | -1.45774344  | 0.150342497 | -0.109642488 | 0.312264602 |
| HLA-F-AS1 | 0.020227972  | 0.983907734 | -0.896251136 | 0.373849369 | -0.642041901 | 0.523454636 |
| HLA-G     | -2.027547937 | 0.04565992  | 1.659006958  | 0.102550747 | 1.155497203  | 0.252772713 |
| HLA-H     | -0.860102194 | 0.392091584 | 2.658384741  | 0.010147074 | 0.429532475  | 0.669177034 |
| HLA-J     | 0.626510951  | 0.532616796 | -0.084448649 | 0.932992577 | -1.925587317 | 0.059217754 |
| HLA-L     | -0.188695715 | 0.850769836 | 1.367112335  | 0.176902227 | 1.157871014  | 0.251810599 |
| HLCS      | 2.156161719  | 0.033824813 | -0.888836996 | 0.377787872 | 0.961084075  | 0.340624125 |
| HLF       | 0.886134566  | 0.377982595 | -0.178889692 | 0.858652102 | -0.983393638 | 0.329625746 |
| HLTF      | 1.771943486  | 0.079897486 | -0.042592424 | 0.966173748 | -0.184437364 | 0.854333853 |
| HLX       | -1.39378137  | 0.166926026 | 0.15715139   | 0.875675143 | -1.050683286 | 0.297898203 |
| HM13      | -3.104755218 | 0.002568564 | -0.199159424 | 0.842839445 | -0.014589662 | 0.988411184 |
| HMBOX1    | 0.125908417  | 0.900094303 | -1.689346276 | 0.096559975 | -2.349620579 | 0.022328383 |
| HMBS      | -0.970273292 | 0.334594276 | 1.8030623    | 0.076610237 | 0.99092665   | 0.325965979 |
| HMG20A    | 0.986432521  | 0.326650458 | 0.083329762  | 0.933878277 | 0.712709484  | 0.478972397 |
| HMG20B    | -0.067941024 | 0.945988147 | -1.220083915 | 0.227405205 | -1.139990766 | 0.259122257 |
| HMGGA1    | 0.118820683  | 0.905690757 | 0.370745588  | 0.712187127 | 0.678818224  | 0.500037194 |
| HMGB1     | 0.067346244  | 0.946460261 | -1.112144756 | 0.270696471 | -1.031339369 | 0.306796877 |
| HMGB2     | -1.051958852 | 0.295725227 | -0.250964094 | 0.802735037 | -0.710630843 | 0.480249879 |
| HMGB3     | -0.350393515 | 0.726888499 | 2.252084384  | 0.02814508  | 1.930028607  | 0.058652616 |
| HMGCL     | -0.224838218 | 0.82263124  | 2.739794661  | 0.008170571 | 3.529025453  | 0.000839436 |
| HMGCR     | -2.96076926  | 0.003952374 | 1.572318693  | 0.121354362 | 0.719792426  | 0.474633732 |
| HMGCS1    | 2.023907755  | 0.046041061 | -0.486000597 | 0.628810674 | -1.090513316 | 0.280137646 |
| HMGN1     | 0.195013141  | 0.845836377 | -0.033513494 | 0.973380977 | 0.734551922  | 0.465664392 |
| HMGN2     | -3.274784372 | 0.00151775  | 1.273885298  | 0.207820611 | 1.68337007   | 0.097847503 |
| HMGN3     | 2.074807132  | 0.040952105 | 0.228289098  | 0.820230059 | 0.950755101  | 0.34579705  |
| HMGN4     | 0.36423608   | 0.716563575 | -0.492474314 | 0.624256176 | -0.09682545  | 0.923209259 |
| HMGN5     | 0.249878425  | 0.80326917  | 0.751108844  | 0.455645141 | 0.372688983  | 0.710780901 |
| HMGXB3    | 3.265069739  | 0.001564836 | 2.219414427  | 0.030411366 | 2.386219716  | 0.020412679 |
| HMGXB4    | 0.064640641  | 0.948608102 | -0.477204159 | 0.635022567 | -1.448081595 | 0.153146786 |
| HMHAI1    | -0.613138747 | 0.541380751 | 0.548540684  | 0.585440684 | 1.14469035   | 0.257186009 |
| HMMR      | -0.058083736 | 0.953814843 | 0.187360671  | 0.852036321 | 0.204839055  | 0.838437465 |
| HMOX1     | -1.850178301 | 0.067674974 | -0.307852665 | 0.759304982 | -0.812730306 | 0.419800056 |
| HMOX2     | -0.924535096 | 0.357759543 | 0.790080511  | 0.432721644 | 1.785357684  | 0.079596199 |
| HN1       | -2.22993455  | 0.028320435 | 0.330375563  | 0.742314955 | 0.000990211  | 0.999213431 |
| HN1L      | 1.518498415  | 0.132506689 | 2.334584268  | 0.023073871 | 3.49553312   | 0.00093067  |
| HNF1A     | 0.586845731  | 0.558823804 | 1.650899122  | 0.104202115 | 2.30791951   | 0.024705433 |
| HNM1T     | -0.18788903  | 0.851400232 | -0.050823268 | 0.959642197 | -0.360899286 | 0.719526942 |
| HNRNPA0   | -0.473401248 | 0.637110096 | -1.033329975 | 0.30576891  | -1.457280188 | 0.150600659 |
| HNRNPA1   | -0.17720473  | 0.859758594 | 1.187757281  | 0.239804136 | 1.813759235  | 0.075051393 |
| HNRNPA1L2 | 2.065408588  | 0.041853543 | 1.282200314  | 0.204909251 | 1.905174498  | 0.061875242 |
| HNRNPA2B1 | 1.711544547  | 0.090535879 | 1.643614659  | 0.105704208 | 1.768319707  | 0.082431262 |
| HNRNPA3   | 1.275189343  | 0.205629684 | 0.481385014  | 0.632066795 | 1.503216839  | 0.138378421 |
| HNRNPAB   | -0.009308678 | 0.992594123 | -0.524345257 | 0.602050635 | -0.33304829  | 0.740336308 |
| HNRNPC    | -1.653241566 | 0.10187817  | -1.370485232 | 0.175853324 | -1.402696153 | 0.166204158 |
| HNRNPD    | 0.297536553  | 0.766764687 | 0.704153221  | 0.484174695 | 0.8818824    | 0.381594296 |
| HNRNPF    | -0.690963385 | 0.491424099 | 0.706260576  | 0.482873332 | 0.466286271  | 0.642811795 |
| HNRNPH1   | 2.542662565  | 0.012766272 | 0.694305267  | 0.490281933 | 1.872413477  | 0.066351919 |
| HNRNPH2   | -0.532908419 | 0.595452673 | -1.208648926 | 0.231736414 | -1.76953252  | 0.082226711 |
| HNRNPH3   | -0.981996214 | 0.328818817 | -1.857248434 | 0.068391167 | -2.282901682 | 0.026237205 |
| HNRNPK    | -1.530260807 | 0.12957244  | -0.174791783 | 0.861856234 | -0.445525189 | 0.657650684 |
| HNRNPL    | 0.10672526   | 0.915252127 | 0.041619241  | 0.966946175 | 0.197994931  | 0.843763006 |
| HNRNPM    | -0.501243214 | 0.617463165 | 1.870669436  | 0.066474424 | 1.833648926  | 0.071999868 |
| HNRNPR    | -0.122348838 | 0.902904322 | 1.245758903  | 0.217896717 | 1.259374911  | 0.213096978 |

|           |              |             |              |             |              |             |
|-----------|--------------|-------------|--------------|-------------|--------------|-------------|
| HNRNPU    | -0.295810874 | 0.768077893 | 1.426296565  | 0.159180821 | 1.659598934  | 0.102562251 |
| HNRNPUL1  | -0.530378127 | 0.597198039 | -0.361235539 | 0.719245085 | -0.010220826 | 0.991881275 |
| HNRNPUL2  | -2.76146089  | 0.007015744 | -0.995843651 | 0.323491555 | -0.064860904 | 0.948514766 |
| HNRPD     | 1.644220824  | 0.103731758 | -0.274248121 | 0.784875172 | 0.759429987  | 0.450767096 |
| HNRPLL    | -0.181455653 | 0.856431113 | -0.765364028 | 0.447179774 | -2.19566312  | 0.032257876 |
| HOMER1    | -0.274257488 | 0.784535493 | -1.25086271  | 0.216042019 | -1.791220083 | 0.078639729 |
| HOMER2    | -2.774091694 | 0.006770588 | 0.251002086  | 0.802705807 | 0.045878805  | 0.963569378 |
| HOMER3    | -1.797315657 | 0.075747699 | 0.934519807  | 0.353937354 | 0.847694154  | 0.400201786 |
| HOMEZ     | 0.547327223  | 0.585552244 | 0.2158515    | 0.829866108 | 0.28527561   | 0.776481045 |
| HOOK1     | 2.440452721  | 0.016692271 | -0.196377831 | 0.845005707 | -0.298007665 | 0.766795553 |
| HOOK2     | 1.0922034    | 0.277752501 | 1.021848387  | 0.311125575 | 1.878077904  | 0.065558849 |
| HOOK3     | 0.542714372  | 0.588711115 | -1.838166796 | 0.071196445 | -1.662970403 | 0.101882469 |
| HOPX      | 1.752756732  | 0.083158939 | -2.386524995 | 0.020315042 | -1.689268666 | 0.096705527 |
| HORMAD1   | -0.531797107 | 0.596218952 | -0.13613435  | 0.892189776 | -3.11868088  | 0.002863166 |
| HOTAIRM1  | -0.343037999 | 0.73239559  | -1.950594429 | 0.055976817 | 0.306491598  | 0.760362284 |
| HOXA1     | -1.751509958 | 0.083374614 | -2.800342126 | 0.00693704  | -1.257927034 | 0.213616328 |
| HOXA10    | -1.734272417 | 0.08640399  | 0.129765944  | 0.897203736 | -1.379128164 | 0.173315647 |
| HOXA2     | -0.404251982 | 0.687017352 | -1.24469194  | 0.218285926 | 0.512589322  | 0.610246151 |
| HOXA3     | 0.264681844  | 0.791879264 | -1.554831183 | 0.125464417 | -0.403421038 | 0.688168325 |
| HOXA4     | 0.724201323  | 0.470880949 | 0.201710442  | 0.840853825 | 0.840658837  | 0.40409927  |
| HOXA5     | -0.9223184   | 0.358907754 | 0.084708697  | 0.932786737 | 0.03677105   | 0.704807747 |
| HOXB2     | -0.423551357 | 0.672936069 | -4.891622894 | 8.40E-06    | -3.474159766 | 0.000993741 |
| HOXB3     | 1.545711617  | 0.125796346 | -3.576665979 | 0.000713288 | -2.275495479 | 0.026706554 |
| HOXB4     | -0.694575462 | 0.489168145 | -5.027349455 | 5.15E-06    | -5.389899279 | 1.44E-06    |
| HOXC4     | -0.40631127  | 0.685509462 | -1.319033014 | 0.19237829  | -1.114215371 | 0.269926193 |
| HOXC5     | -2.59353997  | 0.011139993 | -0.963895074 | 0.339128164 | 0.217644672  | 0.828493743 |
| HP        | -0.145397309 | 0.884732794 | 1.888404818  | 0.064011329 | 1.300512189  | 0.198729827 |
| HP1BP3    | 0.070368105  | 0.944061827 | 0.299462828  | 0.765664927 | 0.296183395  | 0.768181053 |
| HPCAL1    | -2.317610815 | 0.022812736 | 0.710409614  | 0.480316869 | 1.040255829  | 0.302672857 |
| HPCAL4    | 3.008585365  | 0.003430485 | 0.535516614  | 0.594354536 | 0.94027569   | 0.351097574 |
| HPD       | -2.828300952 | 0.00580488  | -0.427675631 | 0.670482113 | 0.499493652  | 0.619380298 |
| HPDL      | -0.089469325 | 0.928914132 | -1.644311464 | 0.105559766 | -1.291911085 | 0.201672033 |
| HPGD      | 0.33228006   | 0.740475317 | -0.300223748 | 0.765087433 | -0.793381923 | 0.430890139 |
| HPRT1     | 0.761006473  | 0.448706512 | 1.463607553  | 0.148737645 | 1.893598713  | 0.063426811 |
| HPS1      | -1.931612991 | 0.056655395 | 0.212163089  | 0.832728837 | 0.014674314  | 0.988343948 |
| HPS3      | 0.440620515  | 0.660578288 | -0.132002597 | 0.895442289 | 0.230563715  | 0.818490467 |
| HPS4      | 3.547457368  | 0.000628805 | 1.818420217  | 0.074200759 | 2.636255893  | 0.010815572 |
| HPS5      | 1.050734503  | 0.296284152 | 3.065059428  | 0.003309541 | 2.597987118  | 0.0119494   |
| HPS6      | -1.158449091 | 0.24984405  | 2.104970131  | 0.039667124 | 1.485437926  | 0.143012386 |
| HPSE      | -2.045759518 | 0.043793456 | 0.798904226  | 0.427628129 | 0.579763023  | 0.564390009 |
| HPX       | 1.09368916   | 0.277103777 | -1.261982352 | 0.21204164  | 0.082418631  | 0.934606476 |
| HRAS      | -0.088898557 | 0.929366413 | 0.585897891  | 0.56023311  | 0.695112028  | 0.489847382 |
| HRASLS    | -2.422103023 | 0.017501673 | -0.019241077 | 0.98471529  | -1.053210206 | 0.296748966 |
| HRASLS5   | -0.572066734 | 0.568748819 | 0.37065566   | 0.712253751 | 0.585560209  | 0.560513679 |
| HRH2      | -0.471041831 | 0.638787294 | -0.897522143 | 0.373176818 | -1.546813991 | 0.127517577 |
| HRH4      | -0.937822155 | 0.350926446 | 0.895227966  | 0.374391336 | -1.800675782 | 0.077117247 |
| HRK       | -2.5367465   | 0.012968573 | -1.315723999 | 0.193479874 | -1.107826955 | 0.272652331 |
| HRSP12    | -0.826790695 | 0.410612687 | 0.07892753   | 0.937363846 | -0.704839887 | 0.483818897 |
| HS1BP3    | -1.92969279  | 0.056896594 | 2.233797449  | 0.029394518 | 2.053595302  | 0.044675791 |
| HS2ST1    | 1.383887582  | 0.169925372 | -0.180166888 | 0.857653956 | -0.835747553 | 0.406833841 |
| HS3ST1    | 0.640774282  | 0.523349973 | 0.044287737  | 0.964828234 | -0.455258198 | 0.650676333 |
| HS3ST3B1  | 1.716235732  | 0.089670034 | -3.117813659 | 0.002842601 | -3.300564311 | 0.001679149 |
| HS6ST1    | -2.552826573 | 0.012425336 | -0.156106264 | 0.876495126 | -0.432315549 | 0.667165342 |
| HSBP1     | -1.605298825 | 0.112044208 | -1.506236083 | 0.137471717 | -0.965084977 | 0.338634153 |
| HSBP1L1   | 2.870514674  | 0.005142219 | 0.39290298   | 0.695841586 | 1.435975372  | 0.156548821 |
| HSCB      | -0.601410108 | 0.549127388 | 1.324409071  | 0.190598677 | 0.247328858  | 0.805554474 |
| HSD11B1L  | 1.671698664  | 0.098169185 | -1.018824273 | 0.312546965 | -0.452295743 | 0.652795844 |
| HSD17B1   | 1.345929797  | 0.181814471 | -1.197675642 | 0.23594897  | -0.73426391  | 0.465838487 |
| HSD17B10  | -0.929023687 | 0.355441739 | 0.820818528  | 0.415134044 | 1.52021328   | 0.134060252 |
| HSD17B11  | -1.964408415 | 0.05266773  | -0.034720912 | 0.972422337 | -0.614417437 | 0.541417428 |
| HSD17B12  | 0.97147663   | 0.33399839  | 3.556021238  | 0.000760725 | 2.753630612  | 0.007923134 |
| HSD17B13  | -0.163979562 | 0.870126765 | 0.081523336  | 0.935308403 | -0.801889307 | 0.425992532 |
| HSD17B14  | 0.453510548  | 0.651307894 | -0.927464052 | 0.357555997 | 0.14065825   | 0.888642542 |
| HSD17B4   | -0.488227807 | 0.626614118 | 2.273004064  | 0.026773556 | 2.038013722  | 0.046262312 |
| HSD17B7   | 1.608175748  | 0.111412033 | 0.212158404  | 0.832732475 | 1.440884355  | 0.155162293 |
| HSD17B7P2 | 0.492397007  | 0.623676349 | -0.419854594 | 0.676153752 | 1.931793205  | 0.058429357 |
| HSD17B8   | 1.43295439   | 0.155446863 | 1.438601801  | 0.155675458 | 1.627320693  | 0.109259668 |
| HSD3B7    | 2.040795503  | 0.044295594 | 1.828458122  | 0.072660525 | 1.001509924  | 0.320870296 |
| HSDL1     | 1.380594875  | 0.170932633 | 1.334647909  | 0.187243804 | 0.890298519  | 0.377098619 |
| HSDL2     | -1.869352904 | 0.064930555 | -0.639232036 | 0.525206221 | -1.528782034 | 0.131924187 |
| HSF1      | 0.739651488  | 0.461498365 | -0.092668362 | 0.926488614 | 0.490456388  | 0.625719226 |
| HSF2      | 3.532186638  | 0.000661397 | 1.369116153  | 0.176278505 | 1.783284503  | 0.079936761 |

|          |              |             |              |             |              |             |
|----------|--------------|-------------|--------------|-------------|--------------|-------------|
| HSF4     | 0.631110029  | 0.529619591 | -0.843419809 | 0.402482905 | -0.331808599 | 0.741267251 |
| HSF5     | 0.58693053   | 0.558767105 | -0.366238147 | 0.715529251 | -0.394871362 | 0.694431539 |
| HSH2D    | -5.055947504 | 2.34E-06    | -0.591355407 | 0.556596177 | -1.372236025 | 0.175438838 |
| HSP90AA1 | 1.258074421  | 0.21172363  | 2.529260492  | 0.014191013 | 2.557292716  | 0.013272896 |
| HSP90AB1 | -0.691503253 | 0.491086559 | 2.61809065   | 0.011279046 | 2.721332468  | 0.008638492 |
| HSP90B1  | 1.516005663  | 0.133135204 | 3.241619529  | 0.00197789  | 3.203500994  | 0.002237059 |
| HSPA12B  | 0.366402375  | 0.714952476 | 0.110896076  | 0.912084291 | -0.451698994 | 0.653223142 |
| HSPA13   | 0.583746033  | 0.560898336 | 0.069868498  | 0.944540345 | -1.161879526 | 0.250191891 |
| HSPA14   | 0.010761272  | 0.991438499 | -0.313423781 | 0.755090959 | -0.742260258 | 0.46101874  |
| HSPA1A   | -2.490065922 | 0.014668711 | 0.93551508   | 0.353428832 | 0.483389789  | 0.63069579  |
| HSPA1B   | -0.194713524 | 0.846070219 | 1.507565383  | 0.13713157  | 0.600022172  | 0.550901689 |
| HSPA1L   | -1.811554409 | 0.073498298 | 1.224225857  | 0.225851068 | 2.565926326  | 0.012981463 |
| HSPA4    | 0.743752851  | 0.459025645 | 3.876576751  | 0.000274049 | 3.667986743  | 0.000544168 |
| HSPA5    | -1.477889484 | 0.143040775 | 2.110894868  | 0.03913363  | 1.71646247   | 0.091581515 |
| HSPA6    | -2.051443943 | 0.043224457 | -0.178246001 | 0.859155244 | -1.176758179 | 0.244248923 |
| HSPA7    | 1.650243454  | 0.102491226 | 0.252530455  | 0.80153013  | -0.197843877 | 0.843880628 |
| HSPA8    | 1.572346713  | 0.119492182 | 3.557234831  | 0.000757856 | 3.397977936  | 0.001253202 |
| HSPA9    | 0.304398721  | 0.761549491 | 2.417369031  | 0.018820126 | 2.476758528  | 0.016291107 |
| HSPB1    | -0.896459189 | 0.372476086 | -1.981007991 | 0.052372035 | -1.520289322 | 0.134041176 |
| HSPB11   | 1.723762536  | 0.088295004 | -1.084110903 | 0.2828329   | -0.293748958 | 0.770031148 |
| HSPBAP1  | 1.135152924  | 0.259422215 | 1.379272162  | 0.173143122 | 1.735303866  | 0.088164359 |
| HSPBP1   | -0.854728376 | 0.395044054 | 1.502625256  | 0.13839904  | 2.545778181  | 0.013670816 |
| HSPC159  | -4.142546068 | 7.92E-05    | -0.142330084 | 0.887316003 | -1.82922747  | 0.072669046 |
| HSPD1    | 1.606685421  | 0.111739159 | 3.539658683  | 0.000800443 | 3.834262772  | 0.000320418 |
| HSP E1   | 0.881920161  | 0.380244882 | -1.080466537 | 0.284437999 | 0.029410936  | 0.976640978 |
| HSPG2    | 1.306061444  | 0.194966915 | 1.281818426  | 0.205042292 | 0.703067265  | 0.484914327 |
| HSPH1    | 0.149317488  | 0.88164796  | 3.553837571  | 0.000765915 | 3.029407521  | 0.003697226 |
| HTATIP2  | -2.420084297 | 0.017592822 | 0.226578642  | 0.821553622 | -0.768857693 | 0.445194855 |
| HTATS F1 | 0.790287435  | 0.431504163 | 3.952222917  | 0.00021402  | 3.671293011  | 0.000538529 |
| HTR2B    | -0.139895341 | 0.889065345 | -0.651144792 | 0.517542568 | -0.253628787 | 0.800707327 |
| HTR3A    | -1.86882294  | 0.065005133 | -0.507516084 | 0.613730688 | -0.378678785 | 0.706352289 |
| HTR6     | 0.48656488   | 0.627787563 | -0.053157595 | 0.957790289 | -0.30382344  | 0.762383708 |
| HTR7     | -0.096165879 | 0.923609525 | 0.529382607  | 0.598574627 | -0.270496853 | 0.787768317 |
| HTR7P1   | -0.830593721 | 0.408471853 | -1.385889609 | 0.171123304 | -1.349928799 | 0.182447478 |
| HTRA1    | 0.658845127  | 0.511731445 | 1.174322108  | 0.245098628 | 0.902431078  | 0.370677002 |
| HTRA2    | 0.567763579  | 0.571654681 | -1.760662732 | 0.083604064 | -1.193848092 | 0.237549114 |
| HTRA3    | -1.428077281 | 0.156841914 | 1.818449952  | 0.074196156 | 0.206305149  | 0.837297649 |
| HTT      | 0.492914983  | 0.623311788 | 1.199462668  | 0.23525918  | 1.529192927  | 0.131822441 |
| HUS1     | 0.763346546  | 0.447317337 | -2.037661276 | 0.046186461 | -1.233408231 | 0.222554007 |
| HUWE1    | 0.589142047  | 0.557289401 | 0.706854771  | 0.482506749 | 1.094560473  | 0.278375198 |
| HVCN1    | -0.564096451 | 0.574136699 | -2.081337957 | 0.041858581 | -1.222494319 | 0.226619654 |
| HYAL1    | -0.326660189 | 0.744707785 | 1.004784927  | 0.319203141 | 2.705546256  | 0.009090284 |
| HYAL2    | -0.102010581 | 0.918982518 | -1.19344974  | 0.237585999 | -2.379799626 | 0.020737695 |
| HYAL3    | 0.929425919  | 0.355234507 | -0.117207355 | 0.907103499 | 0.006705132  | 0.994673848 |
| HYDIN    | -0.462337775 | 0.644990813 | 1.038257946  | 0.303489155 | 0.253170163  | 0.801059927 |
| HYLS1    | 0.714038237  | 0.477110734 | -0.673133802 | 0.503554224 | -0.204189125 | 0.838942866 |
| HYOU1    | -0.442324384 | 0.659349797 | 1.297640093  | 0.199584179 | 1.450549729  | 0.152460341 |
| IAH1     | 1.702460267  | 0.092232    | -1.727015945 | 0.089524709 | -1.075427903 | 0.286775521 |
| IARS     | 3.529824073  | 0.00066658  | 2.859962875  | 0.005892256 | 3.685526069  | 0.000514884 |
| IARS2    | 0.929626429  | 0.355131232 | 2.125869941  | 0.037812987 | 2.239174696  | 0.029117697 |
| IBA57    | 0.461858743  | 0.645332962 | 0.552867909  | 0.582493375 | 1.174113803  | 0.245297661 |
| IBTK     | 1.15757379   | 0.250199323 | 1.16634175   | 0.248283077 | 1.186648374  | 0.240355216 |
| ICA1     | -0.622234556 | 0.535411523 | -0.085289437 | 0.932327073 | -0.68135974  | 0.498440215 |
| ICA1L    | 1.525917589  | 0.130649867 | -1.330042485 | 0.188747247 | -0.370479187 | 0.712417278 |
| ICAM1    | -2.218672415 | 0.029106345 | -0.135062922 | 0.893033027 | -0.571077374 | 0.570222414 |
| ICAM2    | 0.11046592   | 0.912293755 | 2.178027594  | 0.033512271 | 2.501329409  | 0.015310358 |
| ICAM3    | -3.031737424 | 0.003201415 | -0.995761929 | 0.323530927 | -1.280108014 | 0.205762464 |
| ICAM4    | -0.702686598 | 0.484123009 | -0.106972014 | 0.915182918 | 0.542789062  | 0.589419874 |
| ICAM5    | 1.321618234  | 0.189752699 | 0.231914357  | 0.817426547 | -0.527603792 | 0.599849894 |
| ICK      | 1.018371856  | 0.311318806 | -0.531332763 | 0.597231442 | -0.531522004 | 0.597150463 |
| ICMT     | -0.281599778 | 0.778917682 | 0.739116318  | 0.46283798  | 1.276113908  | 0.207160574 |
| ICOS     | 1.311538362  | 0.193119139 | -0.80226811  | 0.425695789 | -0.682701537 | 0.497598212 |
| ICOSLG   | 0.945578425  | 0.346976812 | 1.782767607  | 0.07989432  | 2.042355892  | 0.045815368 |
| ICT1     | 0.733082251  | 0.465474697 | 1.530499366  | 0.131367418 | 1.758671211  | 0.084073689 |
| ID2      | -0.649079903 | 0.517992879 | -4.519885702 | 3.13E-05    | -3.764105032 | 0.00040122  |
| ID3      | -1.433064845 | 0.15541538  | 1.439260664  | 0.155489478 | 0.594863959  | 0.554320471 |
| IDE      | 1.759464357  | 0.082006487 | 0.241527486  | 0.810004139 | 0.298033842  | 0.766775678 |
| IDH1     | 1.134640795  | 0.259635644 | 1.277264827  | 0.206633634 | 0.212027484  | 0.832852188 |
| IDH2     | -0.76207539  | 0.448071645 | 0.983481289  | 0.329483975 | 1.386709567  | 0.171002958 |
| IDH3A    | 1.574617903  | 0.118966484 | 0.394001121  | 0.695035168 | 0.792380997  | 0.431468558 |
| IDH3B    | -0.41262362  | 0.680895273 | 1.276016336  | 0.207071547 | 2.515378157  | 0.014773887 |
| IDH3G    | -1.48610553  | 0.140858343 | 0.007528238  | 0.994019407 | 0.250136601  | 0.803393244 |

|          |              |             |              |             |              |             |
|----------|--------------|-------------|--------------|-------------|--------------|-------------|
| IDI1     | 0.41154316   | 0.68168421  | -0.250711134 | 0.802929669 | -1.013464058 | 0.315179173 |
| IDI2     | 1.623894922  | 0.108008304 | 2.455435745  | 0.017111683 | 3.79846884   | 0.000359464 |
| IDI2-AS1 | 0.925576211  | 0.357221075 | 1.555922497  | 0.125204712 | 0.176691707  | 0.860385355 |
| IDO1     | -0.189546129 | 0.850105372 | 0.001419451  | 0.998872347 | -1.125824886 | 0.265021315 |
| IDS      | -2.199457246 | 0.030491374 | -2.35277007  | 0.022072076 | -2.614701729 | 0.011441488 |
| IDUA     | 0.45533053   | 0.650003344 | -1.991434766 | 0.051182914 | -1.733962647 | 0.088404068 |
| IER2     | -3.193525665 | 0.001956107 | -3.041234499 | 0.003543115 | -3.298105184 | 0.001691496 |
| IER3     | -2.46046018  | 0.015847994 | -2.053975505 | 0.044526625 | -2.978319157 | 0.004271506 |
| IER3IP1  | 1.127152239  | 0.262770609 | -1.140756536 | 0.258692426 | -1.18072383  | 0.242682243 |
| IER5     | -0.948186692 | 0.345655127 | -2.689199784 | 0.009352514 | -3.691264227 | 0.000505636 |
| IER5L    | -0.339701621 | 0.734898192 | -3.186098804 | 0.002329526 | -3.422825833 | 0.001162228 |
| IFFO1    | 1.23834398   | 0.218912421 | 0.237853056  | 0.812839179 | 0.794349026  | 0.430331704 |
| IFFO2    | 0.745013966  | 0.458266837 | -1.078438462 | 0.285333965 | -0.065799428 | 0.947770871 |
| IFI16    | -0.457857434 | 0.648193886 | 1.336036679  | 0.186792225 | -0.342986901 | 0.73288714  |
| IFI27    | -3.125505264 | 0.002411208 | 1.741251172  | 0.086978805 | 0.219351223  | 0.827170676 |
| IFI27L1  | 1.773247926  | 0.079679645 | -1.377475668 | 0.173694604 | -1.4132599   | 0.16309067  |
| IFI27L2  | 0.158409311  | 0.874500606 | -1.403555714 | 0.165819846 | -0.911420027 | 0.365964493 |
| IFI30    | -2.186947405 | 0.031423731 | 0.815100793  | 0.418372398 | -0.047981357 | 0.961901097 |
| IFI35    | -1.819036161 | 0.072338797 | 2.150774793  | 0.035702707 | -0.271813731 | 0.786760653 |
| IFI44    | -1.053463888 | 0.29503915  | 1.100912358  | 0.275514515 | -1.296034115 | 0.20025761  |
| IFI44L   | -1.288539154 | 0.200967094 | 0.958213852  | 0.341960017 | -1.549900496 | 0.126757522 |
| IFI6     | -1.143970638 | 0.255766834 | -0.37363386  | 0.710048538 | -2.590562442 | 0.012181531 |
| IFIH1    | -1.072089515 | 0.286638359 | 1.47934741   | 0.144496406 | -1.499175107 | 0.139421304 |
| IFIT1    | -1.325958661 | 0.188316721 | 0.985347493  | 0.328574668 | -2.152078192 | 0.03569827  |
| IFIT1B   | -3.957450761 | 0.000154039 | 1.396211873  | 0.168008893 | 0.895728414  | 0.374215978 |
| IFIT2    | -2.269147022 | 0.02572733  | 0.22741583   | 0.820905734 | -3.120533875 | 0.002847886 |
| IFIT3    | -1.676988521 | 0.097126643 | 0.375066752  | 0.708988438 | -2.682516928 | 0.009576418 |
| IFIT5    | -1.364708978 | 0.175856237 | 0.025266326  | 0.97992987  | -2.545137435 | 0.013693273 |
| IFITM1   | -1.551824586 | 0.124326664 | -3.070108425 | 0.003261926 | -3.213991872 | 0.002169257 |
| IFITM10  | -1.2891405   | 0.200758928 | 1.002506023  | 0.320292507 | 0.846179316  | 0.401039022 |
| IFITM2   | -2.918701112 | 0.004471199 | -2.657100133 | 0.010181499 | -3.814391005 | 0.000341562 |
| IFITM3   | -2.491249661 | 0.014623239 | -1.66140337  | 0.102066767 | -0.316793616 | 0.752573243 |
| IFITM5   | 1.090376637  | 0.278551558 | -1.737730321 | 0.087602845 | -1.98183186  | 0.052393567 |
| IFNAR1   | -1.262986068 | 0.209961356 | 0.257104954  | 0.798014026 | -0.053043322 | 0.957885369 |
| IFNAR2   | -0.175454822 | 0.861129105 | 0.238568514  | 0.812286962 | 0.190722638  | 0.849429757 |
| IFNG     | 0.050281776  | 0.960012858 | -0.659789944 | 0.512018427 | -0.614912869 | 0.541092511 |
| IFNGR1   | 0.318851479  | 0.75060174  | -0.601178585 | 0.550079836 | -1.136086822 | 0.260738565 |
| IFNGR2   | -2.722749394 | 0.007818472 | -1.100080889 | 0.275873539 | -1.369367082 | 0.176328495 |
| IFRD1    | -1.097183024 | 0.275582399 | -0.499044268 | 0.619648988 | -1.351155815 | 0.182056505 |
| IFRD2    | 1.986544825  | 0.050113165 | 0.191889056  | 0.848504026 | 0.314715294  | 0.754142547 |
| IFT122   | -0.52352773  | 0.601935198 | 1.728082074  | 0.089331927 | 1.708527131  | 0.093053059 |
| IFT140   | 1.769827784  | 0.080251855 | 0.007625141  | 0.993942426 | 0.451706668  | 0.653217646 |
| IFT172   | 1.765775668  | 0.080934189 | 0.232692142  | 0.816825375 | 1.836278048  | 0.071604418 |
| IFT20    | 1.840636485  | 0.069076448 | -1.329872775 | 0.188802823 | -0.558841478 | 0.578488532 |
| IFT27    | 1.554652891  | 0.123651308 | 0.470757296  | 0.639592068 | 0.068263171  | 0.945818278 |
| IFT43    | 0.374510768  | 0.70893368  | 0.238640689  | 0.81223126  | 0.362545517  | 0.718303406 |
| IFT46    | 0.569618015  | 0.570401526 | 0.790869371  | 0.432264811 | 2.359539242  | 0.021793957 |
| IFT52    | -0.103158953 | 0.918073723 | -0.590477112 | 0.557180681 | 1.276332077  | 0.207084023 |
| IFT57    | 1.592995771  | 0.114780219 | 0.359676672  | 0.720404378 | 0.485456775  | 0.629238346 |
| IFT74    | 1.935873758  | 0.056123284 | 0.200295988  | 0.841954658 | -0.407718747 | 0.685028204 |
| IFT80    | 1.718083281  | 0.089330902 | -0.917428119 | 0.362744088 | -1.356773944 | 0.180274504 |
| IFT81    | -0.970125374 | 0.334667573 | -0.754200286 | 0.453801483 | -0.27431005  | 0.784851497 |
| IFT88    | 2.366452022  | 0.020174588 | 0.325227176  | 0.746187618 | 1.189946544  | 0.239066786 |
| IGBP1    | -0.273818024 | 0.784872107 | 1.265451532  | 0.210804884 | 1.604239076  | 0.114263317 |
| IGF1R    | 0.292137563  | 0.77087546  | -0.523896132 | 0.602361005 | -0.575791727 | 0.56705307  |
| IGF2BP2  | -3.489252305 | 0.000761802 | 1.089576376  | 0.28043755  | 0.714984284  | 0.477576546 |
| IGF2BP3  | -2.526945673 | 0.01331007  | 0.087198772  | 0.93081597  | -1.527371707 | 0.132273887 |
| IGF2R    | -2.536669091 | 0.01297124  | -0.16493229  | 0.869574778 | -0.182896311 | 0.855537153 |
| IGFALS   | 0.81912819   | 0.414946674 | -0.295091023 | 0.768985456 | -0.234793645 | 0.815221708 |
| IGFBP2   | -1.822731539 | 0.071771743 | 1.235174445  | 0.22178044  | 1.490408348  | 0.141704726 |
| IGFBP3   | 0.366101116  | 0.715176449 | -0.791401229 | 0.431956971 | 0.492303408  | 0.624421354 |
| IGFBP4   | 0.826053067  | 0.411028702 | 0.968789819  | 0.336700755 | 1.26393761   | 0.211466473 |
| IGFBP6   | 1.843063601  | 0.06871768  | 0.682051096  | 0.497940392 | -0.403182549 | 0.688342739 |
| IGFBP7   | 0.571887383  | 0.568869789 | -1.776166822 | 0.080987443 | -2.841423742 | 0.00624497  |
| IGFLR1   | 0.146320471  | 0.884006186 | 2.185799963  | 0.032909586 | 1.520923184  | 0.133882246 |
| IGHMBP2  | 1.148820593  | 0.253771877 | 0.135657855  | 0.892564779 | 1.523873161  | 0.13314456  |
| IGJ      | -0.21650974  | 0.82909621  | 0.62803611   | 0.532462683 | 0.268822039  | 0.789050398 |
| IGLL5    | -1.027128182 | 0.307201254 | 1.538051135  | 0.129512129 | 0.559477103  | 0.578057706 |
| IGSF22   | -0.22445773  | 0.822926329 | -0.339336762 | 0.735590257 | -0.012076384 | 0.990407414 |
| IGSF23   | -2.249953359 | 0.026969289 | 0.470960825  | 0.639447592 | 0.96625804   | 0.338052149 |
| IGSF6    | -2.164403891 | 0.03316682  | -2.036027626 | 0.046355579 | -2.448428031 | 0.017492009 |
| IGSF8    | 1.029350002  | 0.306162333 | 1.19623534   | 0.236505991 | 2.751819376  | 0.007961762 |

|         |              |             |              |             |              |             |
|---------|--------------|-------------|--------------|-------------|--------------|-------------|
| IGSF9B  | 1.161985512  | 0.248412315 | -0.314057516 | 0.754612068 | 0.064348213  | 0.948921156 |
| IK      | -1.571879004 | 0.11960067  | -0.031553839 | 0.974936945 | 0.456694777  | 0.649649564 |
| IKBIP   | -2.841013028 | 0.005597519 | -0.501819839 | 0.617707198 | -0.914650066 | 0.364280542 |
| IKBKAP  | 2.530512867  | 0.013184851 | 2.17238248   | 0.033956057 | 2.430980516  | 0.018270677 |
| IKBKB   | 1.158255365  | 0.24992265  | 0.866307558  | 0.389916041 | 0.872341202  | 0.386731622 |
| IKBKE   | 0.170256548  | 0.865202832 | 1.636253389  | 0.107239998 | 2.097634978  | 0.040443991 |
| IKBKG   | -1.891859476 | 0.061829002 | -0.533881405 | 0.595478166 | -0.611446842 | 0.543367719 |
| IKZF1   | 0.64034271   | 0.523629124 | 0.114123441  | 0.909536834 | 0.060147033  | 0.952251768 |
| IKZF2   | 1.340673714  | 0.183509103 | -2.49288588  | 0.015568463 | -2.067805018 | 0.043270256 |
| IKZF3   | 0.143001956  | 0.886618603 | -0.880731207 | 0.382123693 | -0.275839506 | 0.783682442 |
| IKZF4   | 0.170766697  | 0.864802881 | -0.691178584 | 0.492229811 | -1.178774658 | 0.243451379 |
| IKZF5   | -0.586970062 | 0.558740673 | -1.979767358 | 0.052515088 | -3.031782419 | 0.003672368 |
| IL10    | -3.027325735 | 0.003243941 | 0.77925713   | 0.439018435 | 0.963583699  | 0.33937996  |
| IL10RA  | 0.603937955  | 0.54745308  | 0.206066153  | 0.837465902 | 0.064851213  | 0.948522447 |
| IL10RB  | -1.81105906  | 0.073575608 | 0.339829751  | 0.735220903 | -0.012987753 | 0.98968353  |
| IL11RA  | 1.155002855  | 0.251244906 | 1.501896333  | 0.138586839 | 2.877795111  | 0.005651301 |
| IL12A   | -0.62247788  | 0.535252303 | -1.462222792 | 0.149115401 | -2.261726768 | 0.027598932 |
| IL12RB1 | -1.350226351 | 0.180437999 | -1.977781189 | 0.052744805 | -0.721561971 | 0.473553266 |
| IL12RB2 | -0.381855982 | 0.703497285 | -0.929402157 | 0.356559639 | -0.097145466 | 0.92295627  |
| IL13RA1 | -0.747032263 | 0.457053927 | -1.045147687 | 0.30032133  | -1.796278925 | 0.077822099 |
| IL15    | 0.485765942  | 0.628351675 | -0.736407032 | 0.4644719   | -1.694110058 | 0.095776427 |
| IL15RA  | -0.787089369 | 0.433363877 | -0.018362659 | 0.985413005 | -1.251146875 | 0.216060834 |
| IL16    | -2.488059855 | 0.014746061 | 0.567511544  | 0.572572205 | 0.949540611  | 0.346408647 |
| IL17RA  | -0.833189112 | 0.407014721 | 0.636962779  | 0.526672796 | 0.452963533  | 0.652317817 |
| IL17RB  | -1.109120714 | 0.270428012 | -0.318663643 | 0.751134309 | -0.953020469 | 0.344658136 |
| IL17RC  | 0.596998877  | 0.552055287 | 0.224291206  | 0.823324472 | -0.961092636 | 0.340619859 |
| IL17RD  | 0.761567627  | 0.448373158 | 2.177165338  | 0.033579725 | 2.32527726   | 0.023689921 |
| IL17RE  | -0.457266756 | 0.648616668 | -0.727195687 | 0.47005166  | -0.984215899 | 0.329224943 |
| IL18    | -2.068721059 | 0.041533905 | 0.981978352  | 0.330217495 | 0.325374228  | 0.746105353 |
| IL18BP  | 0.359805089  | 0.719862949 | -1.354394151 | 0.180900376 | -0.347633816 | 0.729412988 |
| IL18R1  | -1.359877365 | 0.177374866 | 0.611165097  | 0.543494912 | -0.867626253 | 0.389286246 |
| IL18RAP | -0.147510097 | 0.883069993 | 1.185046091  | 0.240865836 | 0.900289315  | 0.371805517 |
| IL1B    | -2.13150802  | 0.035861195 | -0.996627796 | 0.323113929 | -2.255187464 | 0.028031932 |
| IL1R1   | -2.445054126 | 0.01649462  | -0.743525938 | 0.460185665 | -2.132115279 | 0.037378595 |
| IL1R2   | -2.276359943 | 0.025273779 | -0.327803449 | 0.744248893 | -1.079552968 | 0.28494967  |
| IL1RAP  | -1.272322428 | 0.20664134  | -1.47313917  | 0.146157772 | -3.059440252 | 0.003394138 |
| IL1RL1  | -1.043361312 | 0.299665274 | -0.709574768 | 0.480830657 | -1.477535472 | 0.145110983 |
| IL1RN   | -3.024010852 | 0.003276238 | -0.175419084 | 0.861365598 | -1.38504682  | 0.171508133 |
| IL20RB  | 1.453982553  | 0.149541455 | 0.497677682  | 0.620606055 | 1.96370564   | 0.054515172 |
| IL21R   | 1.170664202  | 0.244923483 | 0.265526498  | 0.791551996 | 1.247421448  | 0.217412766 |
| IL23A   | 1.837357452  | 0.069563628 | 0.406137302  | 0.68614674  | 0.458764885  | 0.648171193 |
| IL23R   | 0.038266372  | 0.969562785 | -1.898443411 | 0.062651756 | -1.882228312 | 0.064982862 |
| IL24    | 2.197906186  | 0.030605646 | 1.136792448  | 0.260332595 | 2.971623383  | 0.004352649 |
| IL27    | -0.879278    | 0.381667499 | 0.154199368  | 0.877991587 | -1.299117657 | 0.199204658 |
| IL27RA  | 0.565910706  | 0.57290811  | 2.147553533  | 0.035969722 | 2.659513092  | 0.010175381 |
| IL28RA  | 2.590784173  | 0.011223444 | 0.307755439  | 0.75937859  | 0.13823199   | 0.890550857 |
| IL2RA   | -0.933508364 | 0.353135603 | 0.709493465  | 0.480880709 | -0.13156895  | 0.895794823 |
| IL2RB   | 1.255549158  | 0.212633904 | -1.403383803 | 0.165870836 | -0.535822165 | 0.594194436 |
| IL2RG   | -1.61834818  | 0.109199673 | 0.012849183  | 0.989792522 | 0.809716398  | 0.421516153 |
| IL31RA  | -4.244687373 | 5.45E-05    | -1.397019676 | 0.167767019 | -0.813644516 | 0.419280347 |
| IL32    | -0.321071237 | 0.748924759 | -0.551506058 | 0.58342021  | -0.122583783 | 0.902873723 |
| IL34    | 1.072725182  | 0.28635458  | 0.210566924  | 0.833968396 | 1.034678737  | 0.305247904 |
| IL3RA   | -1.071529842 | 0.286888372 | 1.299695059  | 0.198883329 | 0.911444519  | 0.365951706 |
| IL41    | 0.207008537  | 0.836485886 | -0.120144632 | 0.904786697 | -0.058773028 | 0.953341241 |
| IL4R    | 1.190337989  | 0.237144503 | 1.412187573  | 0.163275092 | 1.566136365  | 0.122926943 |
| IL5RA   | 0.63990207   | 0.523914221 | -0.412707583 | 0.681353155 | -1.194408508 | 0.237331692 |
| IL6R    | -2.758801733 | 0.007068379 | 0.916538338  | 0.363206385 | 0.68663586   | 0.495133839 |
| IL6ST   | 2.11436822   | 0.037338857 | -1.182039991 | 0.24204699  | -1.394270708 | 0.16872016  |
| IL7     | -0.022962758 | 0.981732451 | -0.435246076 | 0.665010487 | -1.074099516 | 0.287365219 |
| IL7R    | 2.916596586  | 0.004498734 | 0.793492961  | 0.430747537 | 0.570097668  | 0.570882133 |
| IL8     | -0.011638682 | 0.990740475 | -0.955253433 | 0.343441798 | -0.852856642 | 0.397356639 |
| IL9R    | 1.275506452  | 0.205518011 | -1.154914405 | 0.252894549 | -0.467640859 | 0.641848592 |
| ILDR1   | 0.188062232  | 0.851264872 | -1.184914061 | 0.240917626 | 0.43199061   | 0.667400092 |
| ILF2    | 1.784223904  | 0.077866043 | 2.903615203  | 0.005221759 | 4.830832668  | 1.09E-05    |
| ILF3    | 3.243084588  | 0.001676494 | 0.678969461  | 0.499876545 | 1.574540762  | 0.120972019 |
| ILK     | -2.324251359 | 0.022436999 | 2.247113108  | 0.028480003 | 2.153890002  | 0.035549091 |
| ILKAP   | 1.181619605  | 0.240569548 | -0.424412894 | 0.672845857 | 2.404891369  | 0.019493203 |
| ILVBL   | -0.03626095  | 0.971157178 | 2.393013154  | 0.019992028 | 2.88447351   | 0.005548143 |
| IMMP1L  | 0.394509235  | 0.694168463 | -0.24465741  | 0.807591233 | 0.091195109  | 0.927661623 |
| IMMP2L  | 1.235880342  | 0.219822426 | 1.420402426  | 0.160881436 | 1.335303552  | 0.187156967 |
| IMMT    | 0.235781941  | 0.814154844 | 1.861207592  | 0.067820944 | 2.471891605  | 0.016491969 |
| IMP3    | 0.600110038  | 0.549989482 | 0.353510361  | 0.724996562 | 0.917308573  | 0.362898291 |



|         |              |             |              |             |              |             |
|---------|--------------|-------------|--------------|-------------|--------------|-------------|
| IMP4    | 0.93852251   | 0.350568626 | 1.397282828  | 0.167688284 | 1.770167974  | 0.082119706 |
| IMPA1   | 0.482447814  | 0.630696891 | -1.52884555  | 0.13177653  | -2.10467764  | 0.039800661 |
| IMPA2   | -0.842983645 | 0.401544246 | 0.05416035   | 0.956994837 | -0.175878038 | 0.861021551 |
| IMPACT  | 1.407727321  | 0.162767209 | -0.960013087 | 0.341061498 | -0.727034834 | 0.470220395 |
| IMPAD1  | 1.769390731  | 0.080325221 | -1.437746323 | 0.155917195 | -1.840362151 | 0.070993748 |
| IMPDH1  | -1.484327559 | 0.141328405 | 0.406506774  | 0.685876833 | 0.608658781  | 0.545201431 |
| IMPDH2  | -0.439518    | 0.661373698 | 3.755896395  | 0.000404591 | 4.52695125   | 3.15E-05    |
| IMPG2   | -1.337057141 | 0.184682029 | 0.215373891  | 0.83023667  | -0.100609128 | 0.92021858  |
| INADL   | 2.294211751  | 0.024181395 | 1.586921087  | 0.118005801 | 2.188137378  | 0.032830239 |
| INCA1   | 1.484457682  | 0.141293961 | -1.198446883 | 0.235651092 | -0.474194903 | 0.637196985 |
| INCENP  | 0.62826245   | 0.53147432  | -0.126367629 | 0.899881028 | -0.920488977 | 0.361249124 |
| INE1    | -0.448512633 | 0.654895944 | -0.16656517  | 0.868295569 | 0.415265756  | 0.679527513 |
| INF2    | 0.619156335  | 0.537427857 | 0.960853755  | 0.34064221  | 2.491361023  | 0.015701629 |
| ING1    | -0.939325622 | 0.350158597 | -3.077138465 | 0.003196694 | -3.636663194 | 0.000600471 |
| ING2    | -0.55231309  | 0.582146962 | 0.903373019  | 0.370090761 | 1.320338085  | 0.192070847 |
| ING3    | -0.995509333 | 0.322243445 | -1.759382635 | 0.083823211 | -1.787832527 | 0.079191242 |
| ING4    | 0.23004193   | 0.818598043 | -0.052556936 | 0.958266792 | 0.09701935   | 0.92305597  |
| ING5    | 2.831460805  | 0.005752688 | 1.40447287   | 0.165548014 | 1.767444129  | 0.082579198 |
| INHBB   | -2.076144254 | 0.040825228 | -0.278542581 | 0.781593482 | -1.329362235 | 0.189096256 |
| INMT    | 0.369511252  | 0.712642624 | 1.770183967  | 0.081988971 | 1.309651959  | 0.195638796 |
| INO80   | -0.602685052 | 0.548282613 | 0.852013759  | 0.397735313 | 0.9243853    | 0.359235312 |
| INO80B  | -0.579856351 | 0.563506932 | -2.268832102 | 0.027042252 | -1.472348397 | 0.146501592 |
| INO80C  | -1.962162142 | 0.052933035 | -1.005991629 | 0.31862732  | 0.799117132  | 0.427584768 |
| INO80D  | 0.718886238  | 0.474133289 | -1.517596544 | 0.134586194 | -1.808036336 | 0.075949249 |
| INO80E  | -1.264350235 | 0.209473821 | -4.320045326 | 6.24E-05    | -3.475638862 | 0.000989249 |
| INPP1   | -0.092003668 | 0.926906188 | -1.442543631 | 0.154565362 | -0.962637414 | 0.339850612 |
| INPP4A  | 1.42845938   | 0.156732271 | -0.935585074 | 0.353393087 | -1.223861524 | 0.226107383 |
| INPP4B  | 1.061252833  | 0.291505869 | 0.095086655  | 0.924576045 | 0.494790964  | 0.622675277 |
| INPP5A  | -0.753967845 | 0.452899949 | -0.148462865 | 0.882496054 | -0.290579509 | 0.772441842 |
| INPP5B  | 0.71646811   | 0.475617105 | 1.950695728  | 0.055964467 | 1.81942154   | 0.074171819 |
| INPP5D  | -1.887672214 | 0.062396403 | 0.898005753  | 0.372921118 | 1.011215132  | 0.316244609 |
| INPP5E  | 1.294325201  | 0.198970796 | -1.809738887 | 0.07555483  | -1.203813206 | 0.233704514 |
| INPP5F  | 0.169692058  | 0.865645427 | 0.507380994  | 0.613824859 | 0.571706847  | 0.569798733 |
| INPP5K  | -2.417094564 | 0.017728592 | 1.069010581  | 0.289524726 | 1.654729258  | 0.103550649 |
| INPLL1  | -0.73426447  | 0.464757679 | -0.105394458 | 0.916429008 | 0.218451142  | 0.827868435 |
| INSC    | -0.459785226 | 0.646814858 | 0.404128458  | 0.687614967 | -0.322629214 | 0.748172516 |
| INSIG1  | 1.583120311  | 0.11701484  | -0.861907291 | 0.392312882 | -1.039440547 | 0.30304836  |
| INSIG2  | 1.000269183  | 0.319948268 | -0.162209647 | 0.871708492 | -1.003410476 | 0.3199609   |
| INSL3   | -0.293177098 | 0.770083448 | -2.272851599 | 0.026783334 | -1.436244173 | 0.156472649 |
| INSR    | 0.606634557  | 0.545669834 | 1.713144509  | 0.092064479 | 1.941483746  | 0.057216179 |
| INTS1   | 0.040238304  | 0.967995138 | 0.197412744  | 0.844199591 | 1.111346983  | 0.271147841 |
| INTS10  | 2.485240106  | 0.014855403 | 2.784562466  | 0.007240822 | 3.855230719  | 0.000299474 |
| INTS12  | -0.748283581 | 0.45630286  | -1.000660963 | 0.32117631  | 0.077603974  | 0.938418536 |
| INTS2   | 1.810427524  | 0.073674272 | 0.682646251  | 0.497566936 | 0.248456495  | 0.804686303 |
| INTS3   | -0.194503693 | 0.846233994 | 1.240616711  | 0.219777215 | 1.769053478  | 0.082307455 |
| INTS4   | 0.118378609  | 0.906039978 | 0.775006473  | 0.441506067 | 2.433293386  | 0.018165694 |
| INTS4L1 | 1.167203125  | 0.24631062  | -2.244075348 | 0.028686392 | -1.181242894 | 0.242477718 |
| INTS5   | -0.081915831 | 0.934901404 | 2.025989894  | 0.047406491 | 2.701221209  | 0.009113389 |
| INTS6   | -0.657332149 | 0.512698925 | -1.230338775 | 0.223571618 | -2.398160341 | 0.019820298 |
| INTS7   | -1.198627896 | 0.233920432 | 1.293623325  | 0.200959449 | 2.107861046  | 0.039512803 |
| INTS8   | 1.32062128   | 0.190083685 | -0.153290498 | 0.87870499  | -0.29188616  | 0.771447723 |
| INTS9   | -1.698421377 | 0.092994392 | 0.844292163  | 0.401999403 | 2.007523588  | 0.049508118 |
| INVS    | 1.19532438   | 0.235201413 | -1.202626861 | 0.234041402 | 0.920452079  | 0.361268229 |
| IP6K1   | -2.781435964 | 0.006631667 | 0.721418919  | 0.473570232 | 0.642666629  | 0.523052066 |
| IP6K2   | -1.936149711 | 0.056088967 | -0.54467632  | 0.58807893  | -0.008479728 | 0.993264247 |
| IPCEF1  | 1.97060774   | 0.051941393 | 0.623269096  | 0.535568083 | 0.829189243  | 0.410503093 |
| IPMK    | -0.987003399 | 0.326372114 | -1.315170293 | 0.193664668 | -3.010371988 | 0.003902219 |
| IPO11   | 1.012801871  | 0.313957204 | 0.283346022  | 0.777927568 | 0.554162686  | 0.581664569 |
| IPO13   | -0.188333827 | 0.851052626 | 1.764869518  | 0.082887232 | 1.978232258  | 0.052809156 |
| IPO4    | -0.149943009 | 0.881155898 | 2.00624329   | 0.049533986 | 2.26129422   | 0.027627389 |
| IPO5    | 2.335378782  | 0.021819644 | 3.564079027  | 0.000741863 | 4.231501234  | 8.65E-05    |
| IPO7    | 0.777393621  | 0.439030811 | 0.056042896  | 0.955501596 | -0.312844565 | 0.755555993 |
| IPO8    | 1.227940211  | 0.222774097 | 2.13361265   | 0.037145544 | 1.521455026  | 0.133749012 |
| IPO9    | 1.587942814  | 0.115919299 | 0.772040505  | 0.443246752 | 1.623504767  | 0.110074397 |
| IPP     | 1.757585213  | 0.08232801  | 0.425296123  | 0.672205658 | 2.386639098  | 0.020391607 |
| IPPK    | 0.57600722   | 0.566094176 | 0.199373564  | 0.842672727 | 1.217931364  | 0.228335478 |
| IPW     | 1.338980639  | 0.1840575   | -1.669844568 | 0.100376821 | -1.022928798 | 0.310721791 |
| IQCB1   | 1.543338504  | 0.126370588 | -0.173052391 | 0.863216963 | -0.067710475 | 0.946256277 |
| IQCC    | 1.440187894  | 0.153395459 | 0.676427547  | 0.501476679 | 0.835085837  | 0.407203145 |
| IQCE    | -0.552868661 | 0.581768097 | 0.122446278  | 0.902971835 | 0.158633484  | 0.874525946 |
| IQCG    | 0.909994194  | 0.365334392 | 0.244766258  | 0.807507354 | 1.34942079   | 0.182609536 |
| IQCK    | -0.287072349 | 0.77473806  | -1.061349389 | 0.292961364 | 0.133369653  | 0.894377157 |

|          |              |             |              |             |              |             |
|----------|--------------|-------------|--------------|-------------|--------------|-------------|
| IQGAP1   | -1.271006867 | 0.207106793 | -0.229351962 | 0.819407871 | -1.045813842 | 0.300121417 |
| IQGAP2   | -1.375428911 | 0.172522093 | 0.069496696  | 0.944834987 | -1.445697947 | 0.153812023 |
| IQSEC1   | -1.582909929 | 0.117062821 | -0.933667031 | 0.354373446 | -1.233740313 | 0.222431146 |
| IQSEC2   | 0.332219575  | 0.740520828 | -0.29869682  | 0.766246419 | -0.547051499 | 0.586507722 |
| IQSEC3   | 2.487853047  | 0.014754056 | 1.234293111  | 0.222106106 | 0.252500329  | 0.801574986 |
| IRAK1    | 0.024596683  | 0.980432873 | 0.591422226  | 0.556551721 | 0.283198033  | 0.778064931 |
| IRAK1BP1 | 1.102773264  | 0.273160247 | -1.013675295 | 0.314977165 | -1.459351842 | 0.150031832 |
| IRAK2    | -0.365933746 | 0.715300892 | -0.193597995 | 0.847171803 | -0.558771352 | 0.578536073 |
| IRAK3    | 0.116139178  | 0.907809324 | 0.217315119  | 0.828730771 | -0.958762818 | 0.341782194 |
| IRAK4    | 0.152723063  | 0.878969554 | -0.39424877  | 0.694853356 | -0.411578152 | 0.682213084 |
| IREB2    | 0.499523643  | 0.618668756 | -1.069608258 | 0.289257797 | -2.237184901 | 0.029255181 |
| IRF1     | -2.230318736 | 0.028293956 | -0.346864466 | 0.729957289 | -1.446092545 | 0.153701742 |
| IRF2     | -1.905167237 | 0.060054479 | -1.196369169 | 0.236454194 | -2.451093742 | 0.017375707 |
| IRF2BP1  | 0.44788355   | 0.655348146 | -0.93668575  | 0.3528313   | -0.809233615 | 0.421791439 |
| IRF2BP2  | -0.73852702  | 0.462177629 | 0.412324769  | 0.681632091 | -1.070712575 | 0.288872552 |
| IRF2BPL  | 0.628067907  | 0.531601155 | -2.644700705 | 0.010519306 | -3.38968714  | 0.00128503  |
| IRF3     | -0.444805116 | 0.657562859 | 1.390062583  | 0.169858942 | 2.023828687  | 0.047748759 |
| IRF4     | 0.780652105  | 0.43712149  | 1.110251009  | 0.271504598 | 0.682004455  | 0.498035547 |
| IRF5     | -0.199564114 | 0.842286186 | 1.269358844  | 0.209418357 | 0.206194751  | 0.837383465 |
| IRF6     | -1.192992261 | 0.236108758 | 1.983592783  | 0.052075063 | 1.568827027  | 0.122298336 |
| IRF7     | -0.814905146 | 0.417346982 | -0.537653694 | 0.592887547 | -2.361696805 | 0.021679231 |
| IRF8     | 1.721013728  | 0.088795151 | 0.72350128   | 0.472300176 | -0.011369104 | 0.9909692   |
| IRF9     | -1.322011017 | 0.189622415 | -1.281821341 | 0.205041276 | -3.21921037  | 0.002136254 |
| IRGM     | 0.58144268   | 0.56244235  | -0.383187106 | 0.702991707 | 0.397277523  | 0.692666673 |
| IRGQ     | 1.940060239  | 0.055604579 | 1.344490809  | 0.184061034 | 1.7049001    | 0.093732121 |
| IRS1     | -1.835325902 | 0.069866902 | -0.537993171 | 0.592654671 | -1.018607328 | 0.312751645 |
| IRS2     | 0.605011126  | 0.546743047 | -0.484669014 | 0.629749299 | -2.105724757 | 0.039705775 |
| ISCA1    | -1.403204219 | 0.164107241 | -2.235185042 | 0.029298022 | -1.933477724 | 0.058216906 |
| ISCA2    | -0.053854476 | 0.957174313 | -2.803603278 | 0.006875741 | -2.037032378 | 0.046363843 |
| ISCU     | -1.791386436 | 0.076701091 | -0.438514841 | 0.662653577 | 0.165669206  | 0.869011426 |
| ISG15    | -1.795203552 | 0.076086182 | 1.440551914  | 0.155125495 | -1.123572711 | 0.265967869 |
| ISG20    | -3.472192874 | 0.00080556  | 0.35978302   | 0.720325269 | -0.58815977  | 0.558779774 |
| ISG20L2  | -1.322883098 | 0.189333389 | 0.236615852  | 0.813794323 | 0.621120167  | 0.537030098 |
| ISL2     | -2.904949594 | 0.004653964 | -2.294687306 | 0.025414798 | -3.493649666 | 0.000936072 |
| ISM1     | 1.287605413  | 0.201290641 | 2.565949409  | 0.01291436  | 1.994982103  | 0.050899102 |
| ISOC1    | 0.692491032  | 0.490469301 | -0.055404623 | 0.956007858 | -0.172351544 | 0.863779932 |
| ISOC2    | 0.01116706   | 0.991115673 | 1.410409796  | 0.163796712 | 2.34186385   | 0.022754442 |
| ISPD     | -2.303942281 | 0.023603676 | 0.82065155   | 0.415228399 | -1.140004255 | 0.259116684 |
| ISY1     | -1.258136429 | 0.211701314 | 2.828455005  | 0.006424762 | 3.070628859  | 0.003287283 |
| ISYNA1   | 0.587952414  | 0.558084056 | -1.628696029 | 0.108835518 | -0.947289842 | 0.347543967 |
| ITCH     | -0.136318317 | 0.891883907 | -1.189085422 | 0.239285275 | -1.821074349 | 0.073916711 |
| ITFG1    | -0.38788774  | 0.699044501 | 0.265965394  | 0.791215619 | -0.760317153 | 0.450241015 |
| ITFG2    | 1.358634157  | 0.177767223 | -0.181879438 | 0.85631594  | 0.871033227  | 0.387439246 |
| ITFG3    | -0.95537558  | 0.342029225 | 2.651176417  | 0.010341628 | 3.235673609  | 0.00203521  |
| ITGA1    | -0.44182792  | 0.659707652 | -0.170058558 | 0.865560017 | -1.318914912 | 0.192543169 |
| ITGA10   | 2.158350238  | 0.033649    | -0.360569471 | 0.719740344 | 0.642339258  | 0.523263002 |
| ITGA2    | -0.942883112 | 0.348346039 | -0.851374515 | 0.398087257 | -1.475893666 | 0.145550009 |
| ITGA2B   | -3.106591728 | 0.00255426  | 2.727314529  | 0.008448644 | 1.210542968  | 0.231133877 |
| ITGA3    | 0.36370234   | 0.716960721 | 0.53330345   | 0.595875545 | 1.494148661  | 0.140726927 |
| ITGA4    | 1.739912776  | 0.085402934 | -0.752041783 | 0.455088305 | -1.989292223 | 0.051541172 |
| ITGA5    | -1.139110448 | 0.257777097 | 0.348096755  | 0.729036582 | 0.706277646  | 0.482931417 |
| ITGA6    | 2.850101619  | 0.005453457 | 1.12838236   | 0.263836747 | 2.340689511  | 0.022819574 |
| ITGA7    | -1.200913468 | 0.233037121 | 1.355962544  | 0.180403638 | 1.432444804  | 0.15755197  |
| ITGA9    | -2.049201096 | 0.043448198 | 2.406167881  | 0.019351201 | 0.345560864  | 0.73096208  |
| ITGAD    | -0.338345022 | 0.735916592 | -0.439823613 | 0.661710858 | -1.849263621 | 0.069677949 |
| ITGAE    | 0.678008786  | 0.499561538 | 1.174795795  | 0.244910538 | 1.186655495  | 0.240352429 |
| ITGAL    | 0.115225968  | 0.908530974 | -0.94877553  | 0.346698845 | 0.555305191  | 0.580888247 |
| ITGAM    | -1.445137975 | 0.152003741 | 0.741805694  | 0.461219324 | 0.15444745   | 0.877809901 |
| ITGAV    | 1.144805046  | 0.255422826 | -0.760089295 | 0.450301401 | -2.31614085  | 0.024219715 |
| ITGAX    | -1.008544116 | 0.315984085 | -1.09150807  | 0.27959434  | -1.240883689 | 0.219800357 |
| ITGB1    | 0.291437564  | 0.77140892  | 0.668077577  | 0.506752515 | -0.450636921 | 0.653983921 |
| ITGB1BP1 | 2.685212494  | 0.008675908 | -1.14444336  | 0.257173584 | -0.057482554 | 0.954364563 |
| ITGB1BP2 | 0.173763156  | 0.862454404 | 1.827739     | 0.072769968 | 2.360589271  | 0.021738055 |
| ITGB2    | -1.674214134 | 0.0976723   | 1.063991123  | 0.291773181 | 1.042206187  | 0.301775851 |
| ITGB3    | -5.291579054 | 8.93E-07    | 2.250840594  | 0.028228548 | 1.070802151  | 0.288832617 |
| ITGB3BP  | -0.393052621 | 0.695240011 | -0.648129265 | 0.519476873 | 0.128023589  | 0.898587025 |
| ITGB4    | -0.709719868 | 0.479771646 | 1.108367858  | 0.272309884 | 0.531069825  | 0.597461699 |
| ITGB5    | -4.021088056 | 0.000122803 | 3.003375783  | 0.003946144 | 1.347045165  | 0.183368828 |
| ITGB7    | 1.031012014  | 0.305386728 | 1.02884692   | 0.307852939 | 1.311316553  | 0.195079754 |
| ITGB8    | -0.409064218 | 0.683495637 | -0.219909517 | 0.826719188 | -3.244594343 | 0.001982356 |
| ITI1H1   | -0.287850045 | 0.774144638 | 0.237638738  | 0.813004616 | 0.798853695  | 0.427736262 |
| ITI1H2   | 1.172962148  | 0.244005594 | -2.6255561   | 0.011061006 | -0.545897117 | 0.587295735 |

|           |              |             |              |             |              |             |
|-----------|--------------|-------------|--------------|-------------|--------------|-------------|
| ITIH4     | 0.894486742  | 0.373524141 | -0.232856367 | 0.816698455 | 0.717664212  | 0.475935039 |
| ITK       | 2.464127921  | 0.015697432 | -0.109952891 | 0.912828952 | 0.211230526  | 0.833470989 |
| ITLN1     | -3.164960331 | 0.002136477 | 1.236257423  | 0.221380744 | 1.805318977  | 0.076378712 |
| ITM2A     | 1.581981305  | 0.117274795 | -0.479956204 | 0.633076256 | -0.324301539 | 0.746912931 |
| ITM2B     | -2.551021437 | 0.012485281 | -1.661686345 | 0.102009741 | -2.177336671 | 0.033667272 |
| ITM2C     | 0.997286725  | 0.321385119 | 0.262613244  | 0.79378576  | 0.198423025  | 0.843429681 |
| ITPA      | 0.697271314  | 0.487488133 | 1.100231644  | 0.275808419 | 1.514475675  | 0.135505843 |
| ITPK1     | -3.6156624   | 0.000500923 | 0.015298229  | 0.987847125 | -0.247310299 | 0.805568765 |
| ITPK1-AS1 | -1.186403706 | 0.238685734 | 1.281766203  | 0.20506049  | 0.956681945  | 0.342822532 |
| ITPKB     | 1.280984084  | 0.203596067 | 1.469527054  | 0.147131279 | 2.016310445  | 0.048553178 |
| ITPKC     | -0.943024128 | 0.348274316 | 3.203432347  | 0.002213885 | 2.744110002  | 0.008128126 |
| ITPR1     | 1.373022331  | 0.173266377 | 1.743343951  | 0.086609627 | 0.084908832  | 0.932635429 |
| ITPR2     | -0.005389409 | 0.995712206 | 0.259105312  | 0.796477803 | -1.566845818 | 0.122760946 |
| ITPR3     | 2.96529341   | 0.003900022 | -0.449608251 | 0.654680427 | 0.471605874  | 0.639032759 |
| ITPRIP    | -2.466817145 | 0.015587854 | -0.236997032 | 0.813500015 | -1.448738907 | 0.152963737 |
| ITPRIPL1  | 3.926603782  | 0.000171792 | -2.428832975 | 0.018290171 | -1.273367859 | 0.208125908 |
| ITPRIPL2  | 0.088765869  | 0.929471559 | 0.038971927  | 0.969047541 | -0.181448632 | 0.856667858 |
| ITSN1     | -2.624981126 | 0.010231652 | 0.584902135  | 0.560897962 | 0.40631648   | 0.68605216  |
| ITSN2     | 0.865710662  | 0.389024756 | -0.232811916 | 0.816732808 | -1.050589387 | 0.297940967 |
| IVD       | 2.462959659  | 0.01574525  | 1.355371355  | 0.180590756 | 2.607352712  | 0.011662331 |
| IVNS1ABP  | -1.13475647  | 0.259587426 | 1.008249101  | 0.317551962 | 1.045006256  | 0.300491228 |
| IWS1      | -0.128765435 | 0.897839822 | 3.061705945  | 0.003341524 | 3.029935875  | 0.003691682 |
| IZUMO4    | 0.033038819  | 0.973719149 | -1.88375678  | 0.064649254 | -1.215897154 | 0.229103464 |
| JAG1      | -1.224980619 | 0.223881648 | 0.356857895  | 0.72250231  | -0.512504565 | 0.613030507 |
| JAG2      | 2.166860943  | 0.032972836 | -1.982059613 | 0.052251037 | -0.081118376 | 0.930563582 |
| JAGN1     | -0.214446135 | 0.830699921 | 0.737907749  | 0.463566439 | 1.211109663  | 0.230918356 |
| JAK1      | -0.155551427 | 0.87674618  | 0.887382233  | 0.378563732 | 0.646000715  | 0.520906372 |
| JAK2      | 1.225288016  | 0.223766427 | 0.082612375  | 0.934446197 | -2.018900944 | 0.048274696 |
| JAK3      | 0.667320592  | 0.506329748 | -1.263784634 | 0.21139846  | -0.690389349 | 0.492788992 |
| JAKMIP1   | -0.114960409 | 0.908740841 | -0.591781905 | 0.556312453 | -0.500125317 | 0.618938311 |
| JAKMIP2   | 0.206113276  | 0.837182955 | -0.209817099 | 0.834550846 | 0.526309457  | 0.600742864 |
| JAKMIP3   | 0.57868641   | 0.56429271  | -0.161941722 | 0.871918515 | -0.101683677 | 0.919369448 |
| JAM2      | 0.645375792  | 0.520378448 | -1.407393036 | 0.164684811 | -0.897396542 | 0.373333214 |
| JAM3      | -0.94281885  | 0.348378727 | 2.495312909  | 0.015472926 | 1.884939722  | 0.064608896 |
| JARID2    | -2.403480064 | 0.018358737 | 0.340607817  | 0.734638094 | -1.04680993  | 0.917001408 |
| JAZF1     | -1.71584821  | 0.089741301 | -1.811606746 | 0.075261756 | -2.379951004 | 0.020729978 |
| JDP2      | -2.29276363  | 0.02426843  | -0.488544135 | 0.627019459 | -1.401665715 | 0.166510303 |
| JHDM1D    | -0.125047667 | 0.900773685 | -0.809610697 | 0.421496143 | -1.256750014 | 0.214039213 |
| JKAMP     | -1.166475042 | 0.246603134 | -2.184751896 | 0.032990295 | -2.521539279 | 0.014544028 |
| JMJD1C    | -0.102284849 | 0.918765459 | -0.376757145 | 0.707738572 | -2.435850619 | 0.018050251 |
| JMJD4     | 0.261615466  | 0.794234948 | 1.91233712   | 0.060810551 | 2.045108611  | 0.045533966 |
| JMJD5     | 2.24249365   | 0.02746601  | -0.176910599 | 0.860199249 | 0.683766136  | 0.49693071  |
| JMJD6     | 1.119319327  | 0.266078082 | 1.198571839  | 0.235602856 | 2.37595417   | 0.020934581 |
| JMJD7     | 1.690698171  | 0.094466571 | 1.349018113  | 0.182610973 | 1.802350826  | 0.076850133 |
| JMJD8     | -0.13864675  | 0.890049028 | 1.969665038  | 0.053692484 | 2.321771493  | 0.023891977 |
| JMY       | 1.565467434  | 0.12109579  | -0.926802733 | 0.357896385 | -1.322300404 | 0.191421028 |
| JOSD1     | -1.539355927 | 0.127338949 | 0.326355456  | 0.745338349 | 1.216457993  | 0.228891539 |
| JOSD2     | -0.182224089 | 0.855829882 | -0.515358525 | 0.608274977 | -0.039010528 | 0.969020154 |
| JPH3      | -0.833314595 | 0.406944351 | -2.275035682 | 0.026643568 | -0.237552413 | 0.813091592 |
| JPH4      | -0.85172978  | 0.396697463 | 2.513303334  | 0.014781105 | 1.42313584   | 0.160220928 |
| JPX       | -0.975128963 | 0.332194041 | -2.550539508 | 0.013437313 | -2.653435752 | 0.010339239 |
| JRK       | 3.516891769  | 0.000695637 | 1.005184203  | 0.319012535 | 1.59054575   | 0.117318267 |
| JRKL      | 0.75574444   | 0.451839379 | 0.18034837   | 0.857512144 | -1.202228039 | 0.234313034 |
| JSRP1     | -1.527131435 | 0.130348038 | -0.762214593 | 0.449042112 | -0.581262076 | 0.563386387 |
| JTB       | 0.487638285  | 0.627030005 | -0.08195491  | 0.934966711 | 0.124128321  | 0.901656288 |
| JUB       | 0.810796118  | 0.419690458 | 1.165253927  | 0.248719448 | 0.00868557   | 0.993100744 |
| JUN       | -0.598781944 | 0.55087086  | -0.797987323 | 0.42815574  | -1.54207948  | 0.128663047 |
| JUNB      | -1.11572573  | 0.267605205 | -2.63118768  | 0.010899077 | -3.666838426 | 0.00054614  |
| JUND      | -0.38351509  | 0.702271453 | -2.764541331 | 0.007643885 | -2.830158785 | 0.006440219 |
| JUP       | -0.879758631 | 0.381408466 | 1.897691871  | 0.062752685 | 0.673815967  | 0.503188524 |
| KALRN     | 0.554138042  | 0.5809029   | 2.489245582  | 0.015712757 | 1.90588245   | 0.061781406 |
| KANK1     | 4.865653975  | 5.03E-06    | 1.263755323  | 0.211408909 | 1.510194909  | 0.136592415 |
| KANK2     | -3.067427382 | 0.002875921 | 1.302253593  | 0.198013318 | 0.684809433  | 0.496277039 |
| KANK3     | 0.970838403  | 0.33431435  | -1.877309813 | 0.06554298  | -0.873785285 | 0.385951304 |
| KARS      | -1.802658943 | 0.07489697  | 1.750818391  | 0.085301677 | 1.834663254  | 0.071847085 |
| KAT2A     | 0.574212887  | 0.567302239 | 0.444246944  | 0.658528778 | 1.190902958  | 0.2386941   |
| KAT2B     | -1.350826165 | 0.180246466 | -1.965480337 | 0.054186783 | -2.990444272 | 0.004128141 |
| KAT5      | -1.029851076 | 0.305928359 | 0.721237829  | 0.473680772 | 1.403893407  | 0.165848997 |
| KAT6A     | -0.921392707 | 0.359387945 | -0.046967429 | 0.962701663 | -0.637761253 | 0.526217436 |
| KAT6B     | 0.352225931  | 0.725518783 | -0.026518892 | 0.978935134 | -0.011349194 | 0.990985014 |
| KAT7      | -0.613314007 | 0.541265415 | -0.795361142 | 0.429669067 | -0.268193708 | 0.789531542 |
| KAT8      | -0.386415075 | 0.700130692 | 0.628686022  | 0.532040032 | 0.753355355  | 0.454378887 |

|          |              |             |              |             |              |             |
|----------|--------------|-------------|--------------|-------------|--------------|-------------|
| KATNA1   | 0.488903984  | 0.626137248 | 2.604656869  | 0.011681288 | 3.285263616  | 0.001757375 |
| KATNAL1  | 0.386032419  | 0.70041303  | -1.455542538 | 0.150948311 | -1.25269838  | 0.21549964  |
| KATNAL2  | 2.53277682   | 0.01310593  | 1.202164686  | 0.234218989 | 1.576985768  | 0.120408007 |
| KATNB1   | -1.283693656 | 0.202650291 | 0.335726325  | 0.738297149 | -0.130284096 | 0.896806578 |
| KAZN     | -1.102584709 | 0.273241703 | -0.467505501 | 0.641902272 | -1.380233084 | 0.172977107 |
| KBTBD11  | -0.618781243 | 0.53767382  | 1.395552308  | 0.168206581 | 1.980257392  | 0.052574999 |
| KBTBD12  | -0.95653094  | 0.341448807 | 1.932600994  | 0.05820777  | 2.487006872  | 0.015875351 |
| KBTBD2   | -0.338341975 | 0.73591888  | 0.194322032  | 0.846607506 | -0.888528149 | 0.37804151  |
| KBTBD3   | 0.076437754  | 0.939245961 | -0.782718344 | 0.436998929 | -0.920483197 | 0.361252117 |
| KBTBD4   | -0.453487608 | 0.651324344 | 1.039137319  | 0.303083565 | 1.278663189  | 0.206267401 |
| KBTBD6   | 1.072091611  | 0.286637423 | -0.679666519 | 0.499438234 | -1.579117581 | 0.119917968 |
| KBTBD7   | -1.885350243 | 0.062712929 | -0.96578761  | 0.338188252 | -3.434623274 | 0.001121262 |
| KBTBD8   | 0.651735052  | 0.516286424 | -0.20244169  | 0.840284838 | -0.14571791  | 0.884665136 |
| KCMF1    | -1.716909166 | 0.089546298 | -1.705086329 | 0.09356696  | -1.784492596 | 0.079738159 |
| KCNA2    | 0.917426848  | 0.361449825 | -1.456187955 | 0.150770457 | -1.586715986 | 0.118184361 |
| KCNA3    | 0.362940018  | 0.717528086 | -1.981797282 | 0.052281198 | -2.209738172 | 0.031210939 |
| KCNA5    | 2.008430719  | 0.047692143 | 0.628262597  | 0.532315374 | -0.45859547  | 0.648292127 |
| KCNA6    | -0.877292274 | 0.382738855 | -1.193118846 | 0.237714528 | 0.392707237  | 0.696020332 |
| KCNAB1   | 1.601240993  | 0.112940766 | -1.370506379 | 0.175846763 | -2.123812892 | 0.038097531 |
| KCNAB2   | -0.579466256 | 0.563768876 | 0.707245123  | 0.48226601  | 1.008827906  | 0.317378218 |
| KCNAB3   | 1.04837665   | 0.297362557 | -0.448436588 | 0.655520648 | 0.934066652  | 0.35462943  |
| KCNC3    | 2.052266027  | 0.043142697 | -2.376496664 | 0.020823499 | -1.769172526 | 0.082287383 |
| KCNC4    | 2.709096251  | 0.008120983 | -0.195804528 | 0.845452337 | 0.657811069  | 0.513343275 |
| KCND1    | -0.943916997 | 0.34782041  | -1.202972913 | 0.233908499 | -0.290154376 | 0.772765371 |
| KCNE1    | -2.706007292 | 0.008190886 | 0.517658336  | 0.606679293 | -0.191470566 | 0.848846579 |
| KCNE1L   | 0.532147596  | 0.595977231 | -1.191800574 | 0.238227082 | 0.416320595  | 0.678760071 |
| KCNE3    | -4.866142415 | 5.02E-06    | -1.028495626 | 0.308016651 | -1.224479223 | 0.225876218 |
| KCNG1    | 0.920341581  | 0.3599337   | -0.912044939 | 0.365546763 | -0.549726445 | 0.584683669 |
| KCNH2    | -0.981037068 | 0.32928887  | 0.739204185  | 0.462785044 | -0.423895612 | 0.673258998 |
| KCNH3    | -0.133894502 | 0.893794576 | 2.258127269  | 0.027742655 | 1.765703238  | 0.082873992 |
| KCNH7    | -0.084406252 | 0.932926943 | 0.670550034  | 0.505187207 | -1.302227508 | 0.198146936 |
| KCNH8    | 1.734091339  | 0.086436287 | -0.477560488 | 0.634770417 | -0.338428751 | 0.736300399 |
| KCNIP2   | 1.060483047  | 0.291853772 | -0.770608745 | 0.444088469 | 0.726456776  | 0.470571792 |
| KCNIP4   | 2.17092025   | 0.032654519 | -2.299464402 | 0.025123806 | -3.687839481 | 0.000511136 |
| KCNJ13   | 0.583704     | 0.560926493 | 0.310667433  | 0.75717495  | 0.772136392  | 0.443266471 |
| KCNJ14   | 1.595058845  | 0.114317727 | 0.386211043  | 0.700763399 | 1.789333307  | 0.078946509 |
| KCNJ15   | -1.388709875 | 0.168458378 | -0.754685731 | 0.453512369 | -1.553613295 | 0.125886815 |
| KCNJ2    | 0.063446347  | 0.949556314 | -1.722412735 | 0.090361032 | -3.02703845  | 0.00372218  |
| KCNK10   | 2.121632579  | 0.036706262 | -0.191826166 | 0.848553062 | 0.575641151  | 0.451828946 |
| KCNK13   | 0.53922017   | 0.591109254 | 1.113218414  | 0.270239056 | 0.623561597  | 0.53543661  |
| KCNK17   | 1.363914333  | 0.176105323 | -1.554270934 | 0.12559791  | -0.272840517 | 0.785975219 |
| KCNK5    | -0.667662945 | 0.506112197 | -0.82045752  | 0.415338058 | -0.81344462  | 0.41939395  |
| KCNK6    | 0.602705945  | 0.548268775 | 1.351485672  | 0.1818243   | 1.317096352  | 0.193147988 |
| KCNK7    | -0.14937187  | 0.881605179 | 0.366489004  | 0.715343101 | 0.854398444  | 0.396509357 |
| KCNMA1   | -1.521666081 | 0.131711379 | 2.145723687  | 0.036122177 | 2.271492272  | 0.026963335 |
| KCNMB1   | -0.965182448 | 0.337122941 | -2.548174    | 0.013519268 | -2.161429855 | 0.034934132 |
| KCNMB3   | 0.208715161  | 0.835157436 | -0.950937774 | 0.345609446 | -0.287045052 | 0.775132824 |
| KCNMB4   | 2.57805672   | 0.011614211 | 1.628804774  | 0.108812423 | 1.651066591  | 0.104299171 |
| KCNN3    | -0.033806549 | 0.973108688 | 1.431831029  | 0.15759672  | 0.483207787  | 0.630824192 |
| KCNN4    | 1.370958429  | 0.173906623 | 0.670128288  | 0.505454028 | 0.505634921  | 0.615089167 |
| KCNQ1    | -1.137503324 | 0.258444279 | 1.760520826  | 0.083628334 | 1.278659094  | 0.206268833 |
| KCNQ1OT1 | -0.475897288 | 0.635337836 | 0.024196128  | 0.980779801 | -0.932196284 | 0.355220074 |
| KCNQ4    | 2.051210206  | 0.043247728 | 0.099291468  | 0.921251632 | 0.48107664   | 0.632328555 |
| KCNQ5    | 1.534736164  | 0.128469588 | -0.874283986 | 0.385594607 | -0.157880779 | 0.875116282 |
| KCNRG    | -2.23019302  | 0.028302619 | -0.543583997 | 0.588825662 | -0.377301332 | 0.707369823 |
| KCNS1    | 1.136553774  | 0.258839047 | 0.636988383  | 0.526656237 | -0.257830563 | 0.797478854 |
| KCNT1    | 0.301738859  | 0.763569674 | -1.482333386 | 0.143702646 | -0.292174817 | 0.771228161 |
| KCTD1    | 0.237386746  | 0.812913685 | 0.130562825  | 0.896576103 | -0.964927947 | 0.338712112 |
| KCTD10   | 1.467450113  | 0.14585176  | 0.582118011  | 0.562758962 | 0.953877026  | 0.344228143 |
| KCTD11   | -0.201418319 | 0.84084066  | 1.62732187   | 0.109127692 | 1.7730785    | 0.081631077 |
| KCTD12   | -1.265542919 | 0.209048256 | -0.388380097 | 0.699166669 | -1.30405911  | 0.197525948 |
| KCTD13   | 0.690971907  | 0.491418769 | -3.412520476 | 0.001183622 | -3.111464894 | 0.002923405 |
| KCTD15   | 1.063693524  | 0.290404683 | -1.537198356 | 0.129720585 | -1.697448417 | 0.095140054 |
| KCTD17   | -0.781250441 | 0.436771421 | 0.123996614  | 0.901749678 | 0.836797288  | 0.406248404 |
| KCTD18   | -0.334769482 | 0.738603012 | 0.746143258  | 0.458615526 | -0.028977195 | 0.97698537  |
| KCTD2    | -1.419596364 | 0.159290767 | 1.258530349  | 0.213277604 | 2.075170314  | 0.042556941 |
| KCTD20   | -0.994160128 | 0.322896007 | 0.874177414  | 0.385652147 | 0.423243858  | 0.673731611 |
| KCTD21   | -1.509577463 | 0.134766825 | 0.11075603   | 0.912194854 | -0.227954906 | 0.820508095 |
| KCTD3    | 0.233571557  | 0.815865136 | 1.131664788  | 0.262465136 | -0.201342778 | 0.841157051 |
| KCTD5    | -0.059943081 | 0.952338151 | 0.318773538  | 0.751051398 | -0.840224684 | 0.404340547 |
| KCTD6    | 0.385810782  | 0.70057658  | -1.505383655 | 0.137690191 | -0.900201527 | 0.371851819 |
| KCTD7    | 2.825011476  | 0.005859674 | -1.447376965 | 0.153212634 | -0.619056958 | 0.538378633 |

|            |              |             |              |             |              |             |
|------------|--------------|-------------|--------------|-------------|--------------|-------------|
| KCTD9      | 0.183741409  | 0.854642968 | -1.376046868 | 0.174134173 | -2.021941951 | 0.047949543 |
| KDELCL1    | 1.457500214  | 0.148570804 | -0.14862628  | 0.882367681 | 0.660341426  | 0.511730558 |
| KDELCL2    | 1.063219123  | 0.290618499 | -0.776857794 | 0.440421592 | -0.816625598 | 0.417588363 |
| KDELR1     | -0.422391361 | 0.673779204 | 0.321999804  | 0.748618641 | 0.882902577  | 0.381047551 |
| KDELR2     | -0.352204152 | 0.725535057 | -0.328066774 | 0.744050826 | -0.642894717 | 0.522905129 |
| KDELR3     | 0.571305666  | 0.569262235 | -1.005567261 | 0.318829743 | -0.899405666 | 0.372271756 |
| KDM1A      | 2.110597213  | 0.03767095  | 2.363551083  | 0.021496684 | 2.683352598  | 0.00955528  |
| KDM1B      | -1.958260631 | 0.053396539 | -0.731444131 | 0.467473461 | -1.046944974 | 0.299603973 |
| KDM2A      | -0.757506192 | 0.450789083 | 0.487796058  | 0.627546038 | 0.674523367  | 0.502742222 |
| KDM2B      | 1.987905913  | 0.049959602 | 0.025792412  | 0.979512071 | 0.562534028  | 0.575987895 |
| KDM3A      | -0.288969844 | 0.77329041  | 1.402056173  | 0.16626503  | 0.347974574  | 0.729158452 |
| KDM3B      | 0.722932055  | 0.471656483 | 1.552748178  | 0.125961316 | 1.105144622  | 0.273802715 |
| KDM4A      | -0.558996054 | 0.5775974   | 2.371230369  | 0.021095044 | 2.162166144  | 0.034874582 |
| KDM4B      | -1.357856983 | 0.178012833 | -0.178696998 | 0.858802715 | -0.246785535 | 0.805972867 |
| KDM4C      | 1.296277869  | 0.198300426 | 0.448805981  | 0.655255702 | 1.011440384  | 0.316137786 |
| KDM5A      | -1.645587491 | 0.103449194 | 2.238644357  | 0.029058675 | 1.719978982  | 0.090935575 |
| KDM5B      | -1.129469912 | 0.261797524 | 1.089442306  | 0.280496139 | 1.209745452  | 0.231437431 |
| KDM5C      | 0.938247423  | 0.350709143 | -0.144385117 | 0.885700401 | 0.015469995  | 0.987711976 |
| KDM6A      | -0.557798863 | 0.578411159 | -2.121754932 | 0.038171954 | -3.356786132 | 0.001419046 |
| KDM6B      | -1.582027356 | 0.117264275 | -1.501155059 | 0.138778027 | -1.7912117   | 0.07864109  |
| KDSR       | 0.873703828  | 0.384679675 | 1.998713896  | 0.05036658  | 1.998984712  | 0.050451563 |
| KEAP1      | 0.197679987  | 0.843755592 | 1.195225582  | 0.236897073 | 1.770450268  | 0.082072207 |
| KEL        | -2.756847971 | 0.00710728  | 0.503839538  | 0.616295936 | -0.146377337 | 0.884146977 |
| KGFLP2     | 0.047703598  | 0.962061568 | 1.459769278  | 0.149786554 | 1.118966481  | 0.267911231 |
| KHDRBS1    | -0.29144866  | 0.771400462 | 2.937585916  | 0.004749685 | 2.812872785  | 0.006750817 |
| KHDRBS2    | 0.154113223  | 0.877876629 | 0.793549689  | 0.430714765 | 0.842333719  | 0.403169295 |
| KHK        | 0.140206952  | 0.888819874 | 2.726942568  | 0.008457064 | 3.899403367  | 0.000259573 |
| KHNYN      | 1.314774409  | 0.192033545 | 1.373687971  | 0.17486175  | 1.117397613  | 0.268575416 |
| KHSRP      | -0.291228871 | 0.771567982 | -0.850926522 | 0.398334019 | -0.789572237 | 0.433094163 |
| KIAA0020   | 1.116583597  | 0.267240093 | 1.153792653  | 0.253350509 | 1.997077504  | 0.050664387 |
| KIAA0040   | -1.43420527  | 0.15509061  | -0.678354378 | 0.500263485 | -1.157239871 | 0.252066147 |
| KIAA0090   | 2.529167529  | 0.013231951 | 2.788090179  | 0.007171864 | 2.305433008  | 0.024854033 |
| KIAA0100   | 1.225229374  | 0.223788404 | 1.906674029  | 0.061555399 | 1.304755057  | 0.197290378 |
| KIAA0101   | 0.771547267  | 0.442468694 | 1.298578493  | 0.199263906 | 0.742102754  | 0.461113397 |
| KIAA0114   | 0.653812276  | 0.514953469 | -1.513279058 | 0.135677111 | -0.833359234 | 0.408167729 |
| KIAA0125   | 3.095322254  | 0.002643211 | 1.059391558  | 0.293844093 | 1.653705816  | 0.103759362 |
| KIAA0141   | 1.828715994  | 0.070861291 | -1.005741496 | 0.318746623 | -0.649721374 | 0.518517399 |
| KIAA0146   | -0.754286877 | 0.452709392 | 2.546728793  | 0.013569561 | 0.634243034  | 0.528493868 |
| KIAA0174   | -1.946590483 | 0.054803598 | 2.881727765  | 0.005548576 | 3.258271067  | 0.001903829 |
| KIAA0182   | -0.04158618  | 0.966923675 | -2.072207688 | 0.042732997 | 0.081180482  | 0.077036682 |
| KIAA0195   | -0.070851955 | 0.943677845 | 0.636668348  | 0.526863239 | 1.333047824  | 0.187891469 |
| KIAA0196   | 1.197844272  | 0.234223836 | 1.041300222  | 0.302087552 | 0.793374708  | 0.430894307 |
| KIAA0226   | -1.206002193 | 0.231079118 | 1.186044562  | 0.240474441 | 1.42156299   | 0.160675323 |
| KIAA0226L  | -3.473573125 | 0.000801933 | 1.243172571  | 0.218841049 | 1.096448454  | 0.277555679 |
| KIAA0232   | -1.555607623 | 0.123423992 | -0.815509041 | 0.418140673 | -1.463108574 | 0.149004616 |
| KIAA0240   | -0.116375797 | 0.907622352 | -1.347329987 | 0.183150647 | -1.553010308 | 0.126030759 |
| KIAA0247   | -1.454655902 | 0.149355273 | 0.085334242  | 0.93229161  | -0.649637883 | 0.518570943 |
| KIAA0284   | 1.522113571  | 0.131599331 | 0.800276222  | 0.426839371 | 1.974533181  | 0.053239172 |
| KIAA0317   | -1.522985686 | 0.131381176 | 0.241020746  | 0.810394968 | 0.355994478  | 0.723176728 |
| KIAA0319   | -1.210578064 | 0.229328624 | 0.312213719  | 0.756005626 | -0.887271222 | 0.378711848 |
| KIAA0319L  | -2.932740089 | 0.004291457 | 2.117900529  | 0.038510881 | 1.942415022  | 0.057100732 |
| KIAA0355   | 0.86783034   | 0.38786955  | -0.955400695 | 0.343367989 | -0.841698617 | 0.403521779 |
| KIAA0368   | 0.786305413  | 0.433820475 | 3.057813307  | 0.003379012 | 2.238772246  | 0.029145458 |
| KIAA0391   | -0.711876734 | 0.478441591 | 1.920872817  | 0.059702364 | 1.655888332  | 0.103314689 |
| KIAA0415   | -0.814430505 | 0.41761728  | -0.427759527 | 0.670421376 | -0.111939197 | 0.911270211 |
| KIAA0430   | -1.609513216 | 0.111119114 | 0.488946769  | 0.626736122 | 0.562699151  | 0.575876194 |
| KIAA0494   | 0.100355196  | 0.920292741 | 0.164002831  | 0.870303079 | 0.44124983   | 0.660724013 |
| KIAA0513   | -4.337524465 | 3.86E-05    | 0.932738256  | 0.354848799 | 0.676146699  | 0.501718866 |
| KIAA0528   | 0.940937194  | 0.349336741 | 2.620002197  | 0.011222846 | 1.443785978  | 0.154347251 |
| KIAA0556   | -0.224787781 | 0.822670355 | -1.23690566  | 0.221141752 | -1.654195544 | 0.103659448 |
| KIAA0564   | 0.43813452   | 0.662372362 | 0.376370747  | 0.708024202 | 0.580965878  | 0.563584622 |
| KIAA0586   | 0.994097409  | 0.322926364 | 1.001263585  | 0.320887468 | 0.606443653  | 0.54666057  |
| KIAA0649   | 1.53638149   | 0.128066005 | 0.43858314   | 0.662604367 | 0.232199564  | 0.817225946 |
| KIAA0664   | 0.870820534  | 0.38624354  | -0.712235749 | 0.479194085 | -0.211876107 | 0.832969717 |
| KIAA0664L3 | 1.271346403  | 0.206986589 | -1.579632873 | 0.11966769  | -1.162012959 | 0.250138137 |
| KIAA0748   | 3.161397913  | 0.002160029 | 2.261593053  | 0.027514156 | 3.36202182   | 0.001396868 |
| KIAA0753   | 0.57541892   | 0.56649012  | -0.227315749 | 0.820983179 | -0.228140501 | 0.820364517 |
| KIAA0754   | 0.838067333  | 0.404284489 | 0.839448012  | 0.404688794 | 0.716921677  | 0.476389537 |
| KIAA0776   | 1.579449484  | 0.117854282 | -1.033277917 | 0.305793055 | -1.332271799 | 0.18814466  |
| KIAA0825   | -1.880709867 | 0.063349543 | -1.231097934 | 0.223289718 | -2.169779297 | 0.034264042 |
| KIAA0889   | 1.198753152  | 0.233871961 | 1.532323423  | 0.130917365 | 1.043609729  | 0.301131462 |
| KIAA0895   | 0.760622832  | 0.448934497 | -1.387741629 | 0.170561274 | -0.688735299 | 0.493821542 |

|           |              |             |              |             |              |             |
|-----------|--------------|-------------|--------------|-------------|--------------|-------------|
| KIAA0895L | -1.036922108 | 0.302639434 | -0.865284436 | 0.390472523 | -0.442474455 | 0.659843091 |
| KIAA0907  | 3.262633856  | 0.001576855 | -3.893889107 | 0.000259026 | -4.107609903 | 0.000130962 |
| KIAA0913  | -0.240587772 | 0.810439437 | -1.477184789 | 0.145073444 | -1.246169159 | 0.217868613 |
| KIAA0922  | -0.044263861 | 0.964795296 | 0.794107511  | 0.43039259  | 1.33899335   | 0.185960204 |
| KIAA0930  | -0.910887828 | 0.36486595  | 1.753250405  | 0.084879649 | 0.980411772  | 0.331081949 |
| KIAA0947  | 0.585231406  | 0.559903749 | 1.266808358  | 0.210322638 | 1.069444304  | 0.289438392 |
| KIAA1009  | -0.937297389 | 0.351194709 | 0.007326751  | 0.994179469 | -1.044725274 | 0.300619968 |
| KIAA1024  | 3.137410914  | 0.002325024 | -1.810071784 | 0.075502528 | -1.453265273 | 0.151707865 |
| KIAA1033  | 0.224467181  | 0.822919    | -0.362232018 | 0.718504375 | -1.766455042 | 0.082746578 |
| KIAA1045  | -2.515322767 | 0.01372552  | -2.470565917 | 0.016472343 | -2.221695868 | 0.030345137 |
| KIAA1107  | 0.353995108  | 0.724197184 | 0.54010045   | 0.591210076 | -1.495239348 | 0.140442803 |
| KIAA1109  | 0.269006888  | 0.788559923 | 0.357427692  | 0.722078053 | -1.717396999 | 0.091409485 |
| KIAA1143  | -0.22423253  | 0.823100997 | -1.930656941 | 0.058453285 | -1.228357322 | 0.224428857 |
| KIAA1147  | 2.504988924  | 0.014104637 | 0.629063805  | 0.531794433 | 0.736055533  | 0.464756106 |
| KIAA1161  | -0.249133737 | 0.803843288 | -0.010059578 | 0.992008516 | 0.335659897  | 0.738376404 |
| KIAA1191  | -0.268671102 | 0.78881749  | -0.058250679 | 0.95375058  | 0.935903061  | 0.353324819 |
| KIAA1199  | -0.031836196 | 0.974675447 | -0.023229787 | 0.981547271 | -1.078665684 | 0.285341719 |
| KIAA1211  | 0.336040453  | 0.737647717 | 0.937259339  | 0.352538769 | -1.198460455 | 0.235763971 |
| KIAA1257  | -1.900032502 | 0.060734014 | -0.328421454 | 0.743784072 | -2.110033566 | 0.039317397 |
| KIAA1267  | -0.868841606 | 0.387319169 | 0.42404631   | 0.673111643 | 0.351914037  | 0.726218022 |
| KIAA1274  | 1.345357363  | 0.181998456 | 1.730714616  | 0.088857368 | 1.531678439  | 0.131208309 |
| KIAA1279  | 2.68492546   | 0.008682782 | 0.363898779  | 0.717266031 | 1.078411147  | 0.285454256 |
| KIAA1310  | 0.487674211  | 0.627004657 | 2.20823693   | 0.031222878 | 2.195849817  | 0.03224379  |
| KIAA1324  | -3.193553729 | 0.001955937 | 1.048048435  | 0.298994389 | 1.854681856  | 0.068887144 |
| KIAA1324L | 1.479679933  | 0.142562941 | 0.450035956  | 0.654373823 | 0.203667896  | 0.839348235 |
| KIAA1328  | 2.067997682  | 0.041603528 | -0.690839135 | 0.49244154  | -0.764434184 | 0.447804332 |
| KIAA1370  | -0.598497683 | 0.551059599 | -2.264652256 | 0.027313848 | -2.91067267  | 0.005160077 |
| KIAA1377  | 1.150604191  | 0.253040999 | -1.554319624 | 0.125586304 | -0.60645921  | 0.546650315 |
| KIAA1383  | -0.679971469 | 0.498324016 | -1.111986165 | 0.270764082 | -2.156455052 | 0.035338826 |
| KIAA1407  | 2.88557449   | 0.004923162 | 1.122130997  | 0.266462987 | 0.65754448   | 0.513513343 |
| KIAA1429  | 0.482480162  | 0.630674009 | 1.50316229   | 0.138260808 | 2.249354524  | 0.028423222 |
| KIAA1430  | 0.477017974  | 0.634542807 | -0.913560572 | 0.364756271 | -1.570270198 | 0.12196224  |
| KIAA1432  | -0.387816056 | 0.699097358 | -0.755281275 | 0.453157829 | -2.238555266 | 0.029160435 |
| KIAA1467  | -0.834495927 | 0.406282231 | 0.410476585  | 0.682979392 | 0.756860481  | 0.452292805 |
| KIAA1468  | 1.288281149  | 0.201056456 | -0.961522035 | 0.340309143 | -1.509692135 | 0.136720484 |
| KIAA1522  | 1.839515907  | 0.069242616 | 0.851658819  | 0.397930706 | 0.236101895  | 0.814211398 |
| KIAA1524  | 1.391031445  | 0.167755588 | 0.406968341  | 0.685539705 | -0.44886414  | 0.655254612 |
| KIAA1530  | 1.381746842  | 0.170579722 | 0.092829413  | 0.926361228 | 0.123038486  | 0.902515293 |
| KIAA1539  | -3.853187566 | 0.000222252 | -1.625947994 | 0.109420442 | -1.549920091 | 0.12677052  |
| KIAA1543  | 1.459127365  | 0.148123473 | -0.452355397 | 0.652712156 | 0.106107962  | 0.91587429  |
| KIAA1586  | 0.982063012  | 0.328786098 | -1.504975212 | 0.13779497  | -1.841103176 | 0.070883419 |
| KIAA1598  | 1.119921454  | 0.265822803 | 0.678537132  | 0.5001485   | -0.510099495 | 0.611978058 |
| KIAA1609  | 2.413412357  | 0.017897092 | 0.911753503  | 0.36569889  | 2.439964114  | 0.017865937 |
| KIAA1614  | -2.19149566  | 0.03108191  | 1.974564217  | 0.053118704 | 1.71924078   | 0.091070861 |
| KIAA1671  | -0.562299103 | 0.575355088 | -1.783662747 | 0.079747032 | -1.188349503 | 0.239690044 |
| KIAA1683  | -0.715774999 | 0.47604289  | 0.26701078   | 0.790414582 | -0.913560086 | 0.364848236 |
| KIAA1704  | 1.379866699  | 0.171156    | -0.606178317 | 0.546778067 | -0.698105394 | 0.487987943 |
| KIAA1715  | 0.681935411  | 0.497087364 | -1.391066082 | 0.169555968 | -0.941904471 | 0.350270277 |
| KIAA1731  | 0.145461458  | 0.8846823   | -0.747037483 | 0.458079785 | -1.996903098 | 0.050683888 |
| KIAA1737  | -0.857439606 | 0.393552751 | 0.377397716  | 0.70726515  | 0.325309725  | 0.746153907 |
| KIAA1797  | 1.037275753  | 0.302475575 | 1.572247987  | 0.12137076  | 1.739864683  | 0.087353249 |
| KIAA1804  | 1.930610717  | 0.056781183 | -0.207474551 | 0.836371091 | 0.098728536  | 0.921704888 |
| KIAA1826  | 1.052257734  | 0.295588894 | -0.176656478 | 0.860397947 | 0.087616274  | 0.930492913 |
| KIAA1841  | 1.501166595  | 0.136925388 | -0.465829436 | 0.643094407 | -0.88640844  | 0.379172417 |
| KIAA1875  | 2.704449214  | 0.008226353 | -0.717048875 | 0.476241829 | -0.239816251 | 0.811344683 |
| KIAA1908  | 4.071901385  | 0.000102318 | -0.128558505 | 0.898154856 | -0.232583539 | 0.816929201 |
| KIAA1919  | 2.382036429  | 0.019391742 | -0.6508333   | 0.517742197 | -0.008042847 | 0.99361127  |
| KIAA1949  | -1.972012691 | 0.051777974 | -1.36610617  | 0.177216048 | -1.972529912 | 0.053473303 |
| KIAA1958  | -1.288144586 | 0.201103767 | -1.007943011 | 0.317697627 | -2.023988906 | 0.047731742 |
| KIAA1967  | -0.154035289 | 0.877937893 | 2.218972132  | 0.030443121 | 2.775811839  | 0.007463847 |
| KIAA1984  | 1.509967816  | 0.134667299 | -0.515284699 | 0.608326232 | 0.388668418  | 0.698989093 |
| KIAA2013  | -1.517418581 | 0.132778668 | 0.195743205  | 0.845500113 | -0.120659354 | 0.904390922 |
| KIAA2018  | -1.62439126  | 0.107902209 | -1.118842649 | 0.267851829 | -1.665149905 | 0.101444984 |
| KIAA2022  | -1.663031194 | 0.099897035 | 1.04607974   | 0.299894526 | 1.3497612    | 0.182500931 |
| KIAA2026  | 0.026286198  | 0.979089134 | -2.521053946 | 0.014491772 | -2.292090553 | 0.025665066 |
| KIDINS220 | 0.074772037  | 0.94056738  | 0.918293389  | 0.362294889 | -0.536677537 | 0.593607254 |
| KIF11     | 1.182105326  | 0.240377803 | 1.120472709  | 0.267162732 | 0.739889465  | 0.462444728 |
| KIF13A    | -2.313039108 | 0.023074635 | 0.446095129  | 0.657201093 | -0.313173515 | 0.755307391 |
| KIF13B    | 0.863776755  | 0.390080576 | 0.731625484  | 0.467363584 | 0.57396354   | 0.568281086 |
| KIF14     | 0.007085019  | 0.994363206 | 0.881307608  | 0.381814343 | 0.093209984  | 0.926068024 |
| KIF15     | -0.193608142 | 0.846933056 | 1.018573341  | 0.312665105 | 1.081524552  | 0.284079857 |
| KIF16B    | 1.265958485  | 0.208900127 | 1.440031729  | 0.155272047 | 0.256807113  | 0.798264906 |

|         |              |             |              |             |              |             |
|---------|--------------|-------------|--------------|-------------|--------------|-------------|
| KIF18A  | -0.76499335  | 0.446341212 | 0.768275574  | 0.445462122 | 1.114676738  | 0.269730059 |
| KIF18B  | -0.306979576 | 0.759590894 | 0.080911273  | 0.935793015 | -0.345191134 | 0.731238493 |
| KIF19   | -1.163459    | 0.247817494 | -1.729462985 | 0.089082735 | -0.795852183 | 0.429464592 |
| KIF1B   | -1.914030338 | 0.058896618 | 0.876245138  | 0.384536719 | 0.29989278   | 0.765364647 |
| KIF1C   | -1.243311372 | 0.217085968 | 1.124416327  | 0.265500772 | 1.146509452  | 0.256439306 |
| KIF20A  | 0.352079743  | 0.725628024 | 0.870618945  | 0.387576496 | 0.54121101   | 0.590499754 |
| KIF20B  | 1.043603172  | 0.29955395  | -0.111228663 | 0.911821726 | -0.712905468 | 0.478852048 |
| KIF21A  | 0.936363971  | 0.351672205 | -0.9802082   | 0.331082822 | -1.18784791  | 0.239886037 |
| KIF21B  | 0.978880112  | 0.330347556 | -0.379796531 | 0.705493304 | 0.210215518  | 0.834259248 |
| KIF22   | 0.74578588   | 0.457802733 | 0.870763559  | 0.387498175 | 1.817991262  | 0.074393176 |
| KIF23   | 0.536352071  | 0.593081094 | 1.156550391  | 0.252230621 | 0.562362875  | 0.576103686 |
| KIF24   | -0.912601253 | 0.363968842 | 0.471975857  | 0.638727275 | -0.209962975 | 0.8344554   |
| KIF26A  | -1.292095703 | 0.199738263 | -0.696960332 | 0.488631212 | -0.106647415 | 0.915448238 |
| KIF26B  | 2.18794254   | 0.031348663 | -0.005843421 | 0.995357844 | 0.146011174  | 0.884434691 |
| KIF27   | -1.874565118 | 0.064200893 | -0.893541949 | 0.375285498 | -1.841295529 | 0.070854803 |
| KIF2A   | 0.320523627  | 0.749338355 | 0.83762205   | 0.405705397 | -0.649949692 | 0.518370989 |
| KIF2C   | 0.464902531  | 0.643160231 | 1.833859144  | 0.071842954 | 0.880579142  | 0.382293471 |
| KIF3A   | 1.407778851  | 0.162751991 | -0.884797122 | 0.379944916 | -1.664451657 | 0.101584974 |
| KIF3B   | -0.410798043 | 0.682228491 | 1.411038938  | 0.163611967 | 1.52243078   | 0.133504844 |
| KIF3C   | -2.319311993 | 0.022715953 | 1.271986008  | 0.208489914 | 0.78881011   | 0.43353588  |
| KIF4A   | 0.602024147  | 0.548720445 | 2.79058574   | 0.007123448 | 3.317514627  | 0.001596332 |
| KIF5A   | -0.912469571 | 0.364037737 | -0.92342803  | 0.359636636 | -1.795797878 | 0.077899541 |
| KIF5B   | 0.365457146  | 0.715655295 | 0.278128471  | 0.781909758 | -1.032951826 | 0.306048269 |
| KIF5C   | -0.01254274  | 0.990021259 | -0.136454878 | 0.891937534 | 0.035983653  | 0.971422819 |
| KIF7    | -0.312123373 | 0.755691981 | 1.277540967  | 0.206536871 | 0.577503461  | 0.565904462 |
| KIF9    | 0.314574536  | 0.753836257 | -0.561701143 | 0.576498933 | -0.567087621 | 0.572911384 |
| KIFAP3  | 1.647215056  | 0.103113501 | 1.04030991   | 0.302543311 | 1.805861999  | 0.076292728 |
| KIFC1   | 0.124738005  | 0.901018116 | 1.048122586  | 0.298960522 | 1.777109283  | 0.080958378 |
| KIFC2   | 1.393825341  | 0.166912787 | -2.16182881  | 0.03479957  | -0.983021551 | 0.329807223 |
| KIFC3   | -1.691692396 | 0.094275995 | 0.577436352  | 0.565895214 | -0.669677814 | 0.505803604 |
| KIN     | -1.475310381 | 0.14373128  | -1.216045387 | 0.228928058 | -1.045293739 | 0.300359547 |
| KIR2DL1 | -1.158200654 | 0.249944851 | -1.776423877 | 0.080944641 | -0.486219069 | 0.628701222 |
| KIR2DL3 | 0.12143962   | 0.903622281 | -0.853989201 | 0.396648927 | -0.355715338 | 0.723384638 |
| KIR2DL4 | -2.291210397 | 0.02436209  | 0.1594559    | 0.873867557 | -2.134168711 | 0.03720262  |
| KIR2DS4 | -1.623237646 | 0.10814893  | -1.385882693 | 0.171125405 | 0.439007343  | 0.662338374 |
| KIR3DL1 | -0.160186969 | 0.873104333 | -0.506335142 | 0.614554144 | 0.023757014  | 0.981130526 |
| KIR3DL2 | 0.693886564  | 0.489597964 | -0.753820296 | 0.454027867 | -1.814219056 | 0.074979641 |
| KIR3DX1 | 0.289915452  | 0.772569278 | -2.16557322  | 0.034498216 | -1.617113739 | 0.111449964 |
| KIRREL3 | 2.064769831  | 0.041915424 | -0.090233292 | 0.928414891 | 0.117000009  | 0.902726896 |
| KISS1R  | -0.047917444 | 0.961891628 | -2.749966045 | 0.007950182 | -2.356527167 | 0.021955029 |
| KIT     | -1.521142603 | 0.131842549 | -0.79810248  | 0.428089454 | -1.342899911 | 0.184699475 |
| KL      | 0.601894505  | 0.548806351 | 0.001310667  | 0.998958768 | -0.261183434 | 0.794905192 |
| KLB     | 1.902451536  | 0.060413073 | -0.643452808 | 0.522484133 | 0.490344079  | 0.625798182 |
| KLC1    | 0.287955779  | 0.774063968 | 1.738864053  | 0.087401498 | 1.581540635  | 0.119362931 |
| KLC2    | -0.318090192 | 0.751177153 | -2.345284266 | 0.022479646 | -0.681582172 | 0.498300581 |
| KLC3    | -1.569347229 | 0.12018929  | 1.706160847  | 0.093365452 | 0.776473637  | 0.440723043 |
| KLC4    | 0.250591256  | 0.802719714 | -0.215192401 | 0.830377493 | 0.083194363  | 0.933992423 |
| KLF1    | -2.007381542 | 0.047805879 | 0.422012124  | 0.674587257 | -1.024290647 | 0.310083966 |
| KLF10   | 0.951324145  | 0.344069617 | 0.460448641  | 0.646927972 | -1.961365807 | 0.054794332 |
| KLF11   | 0.174023719  | 0.862250246 | 1.76487734   | 0.082885904 | -0.180741738 | 0.857220085 |
| KLF12   | 2.013692418  | 0.047125235 | -1.382742199 | 0.172081707 | -1.514931678 | 0.135390502 |
| KLF13   | -0.302983788 | 0.762623937 | -0.438004167 | 0.663021568 | -0.436011809 | 0.664497366 |
| KLF16   | 0.737364724  | 0.46288034  | -1.130298833 | 0.263035306 | -1.010281284 | 0.316687735 |
| KLF2    | -0.016502173 | 0.986871472 | -2.421598259 | 0.018623034 | -2.668324445 | 0.00994202  |
| KLF3    | -0.5080546   | 0.612698022 | -0.284731403 | 0.776871204 | -1.397156339 | 0.16785517  |
| KLF4    | -0.624673925 | 0.533816416 | -0.855201003 | 0.395983412 | -1.83344081  | 0.072031249 |
| KLF5    | -3.405849595 | 0.000999322 | 0.970696243  | 0.335758428 | -1.588073314 | 0.117876816 |
| KLF6    | -0.386639953 | 0.699964789 | -1.190390005 | 0.238776407 | -2.20068052  | 0.031881178 |
| KLF7    | 0.039967788  | 0.968210185 | -2.785702346 | 0.007218474 | -4.288175332 | 7.14E-05    |
| KLF8    | 1.860150896  | 0.066235738 | -0.57550274  | 0.567193053 | 0.411643123  | 0.682165732 |
| KLF9    | 3.412070916  | 0.000979437 | -0.316376347 | 0.752860641 | -0.727270873 | 0.470076952 |
| KLHDC1  | 1.86228281   | 0.065931413 | -2.689748144 | 0.009338905 | -2.554874378 | 0.013355586 |
| KLHDC10 | 1.249671537  | 0.21476372  | -1.823492683 | 0.073419042 | -1.897199967 | 0.062940614 |
| KLHDC2  | 0.654213474  | 0.51469623  | -1.956567565 | 0.055252564 | -1.547642702 | 0.127317918 |
| KLHDC3  | -0.740311749 | 0.461099782 | 1.69642117   | 0.095205077 | 2.502920291  | 0.015248736 |
| KLHDC4  | 0.873121001  | 0.384995475 | 0.654845666  | 0.515173888 | 1.212597572  | 0.230353184 |
| KLHDC5  | 1.746098086  | 0.084316144 | -1.090932315 | 0.279845479 | -1.231838609 | 0.223135399 |
| KLHDC7A | -2.201194651 | 0.030363816 | 2.187337887  | 0.032791467 | 0.470727733  | 0.63965593  |
| KLHDC7B | -1.105507066 | 0.271981147 | 0.962253243  | 0.339944958 | -0.881985874 | 0.381538818 |
| KLHDC8A | -3.288041051 | 0.001455636 | 0.745678014  | 0.458894402 | -0.939981985 | 0.351246889 |
| KLHDC8B | -4.054399189 | 0.000108973 | 2.210645472  | 0.031046418 | 1.965117256  | 0.054347346 |
| KLHL11  | 0.835266746  | 0.40585055  | -0.101202627 | 0.919741093 | -1.94148858  | 0.057215579 |

|             |              |             |              |             |              |             |
|-------------|--------------|-------------|--------------|-------------|--------------|-------------|
| KLHL12      | 0.261309052  | 0.794470451 | 1.291353657  | 0.201739674 | -0.14448494  | 0.885634105 |
| KLHL13      | 0.26492583   | 0.791691909 | 0.868076499  | 0.388955073 | 0.270043133  | 0.788115585 |
| KLHL14      | 2.309290084  | 0.023291383 | 0.718864532  | 0.475130811 | 0.338983446  | 0.735884742 |
| KLHL15      | 0.598811682  | 0.550851117 | -0.200098829 | 0.842108126 | -1.141383564 | 0.25854734  |
| KLHL17      | 2.838471814  | 0.00563842  | -1.827199032 | 0.072852237 | -1.373608624 | 0.175014414 |
| KLHL18      | -0.495169366 | 0.621726206 | 0.845174101  | 0.401510952 | 0.624919119  | 0.534551634 |
| KLHL2       | -0.122564582 | 0.902733973 | -0.137504523 | 0.891111586 | -1.657575271 | 0.102972054 |
| KLHL20      | 0.976274677  | 0.33162935  | -1.818164304 | 0.074240382 | -2.49672459  | 0.015489994 |
| KLHL21      | -1.706553767 | 0.091464517 | 0.269332812  | 0.788636116 | -0.406467677 | 0.685941725 |
| KLHL22      | 0.537758023  | 0.592114108 | -0.094312878 | 0.925187958 | 1.227796773  | 0.22463764  |
| KLHL24      | 1.090602382  | 0.278452727 | -0.6447056   | 0.521677609 | -1.44893068  | 0.152910364 |
| KLHL25      | 1.589511588  | 0.11556469  | 1.016987426  | 0.313412457 | 1.817014485  | 0.074544665 |
| KLHL26      | -0.240161024 | 0.810769183 | -0.659993753 | 0.511888577 | -0.563280977 | 0.575482691 |
| KLHL28      | 0.348488078  | 0.728313741 | -0.785728665 | 0.435246975 | -1.897811261 | 0.0628584   |
| KLHL29      | 1.96920865   | 0.052104567 | 0.222761909  | 0.824508914 | 0.465600986  | 0.643299314 |
| KLHL3       | 2.001591232  | 0.048437754 | -0.241485256 | 0.810036708 | 0.796576606  | 0.429047074 |
| KLHL31      | 0.187470694  | 0.851727185 | -0.236543309 | 0.813850337 | -0.819546555 | 0.415934519 |
| KLHL32      | 3.189786274  | 0.001978882 | 1.140252046  | 0.258900753 | 0.452914163  | 0.652353152 |
| KLHL34      | 0.383596624  | 0.702211233 | -0.412302209 | 0.681648531 | -0.720308039 | 0.474318761 |
| KLHL35      | -0.874252153 | 0.384382716 | 1.525696568  | 0.13255831  | 0.528356001  | 0.599331224 |
| KLHL36      | 2.904809405  | 0.004655862 | -3.715728965 | 0.000459976 | -4.014409807 | 0.000178247 |
| KLHL5       | 1.567829364  | 0.120543288 | -0.937934293 | 0.352194743 | -1.699788978 | 0.094695963 |
| KLHL6       | 1.994067506  | 0.049269439 | 0.718247102  | 0.475508459 | 0.707566912  | 0.482136369 |
| KLHL7       | 1.246483093  | 0.21592561  | 0.268672058  | 0.789142079 | 0.074184811  | 0.941126582 |
| KLHL8       | -0.825836098 | 0.41115112  | -0.882339124 | 0.38126113  | -2.443232787 | 0.017720686 |
| KLHL9       | 0.541791415  | 0.589344114 | -0.675345627 | 0.502158591 | -1.548129504 | 0.127200751 |
| KLK2        | -0.979429679 | 0.330077602 | 2.127583447  | 0.037664383 | 1.842572957  | 0.070665013 |
| KLK4        | -1.719273425 | 0.089112999 | 0.841170817  | 0.403731059 | 0.886340279  | 0.379208818 |
| KLKB1       | 2.381905298  | 0.019398215 | 1.480580625  | 0.144168164 | 2.297887706  | 0.025309836 |
| KLKN        | -0.809448403 | 0.420460802 | -0.53997065  | 0.591299009 | -1.540938191 | 0.128940396 |
| KLRAP1      | 1.667033819  | 0.099096074 | -2.393239822 | 0.019980827 | -2.265147926 | 0.027374768 |
| KLRAQ1      | -0.727657522 | 0.468772814 | 1.584772438  | 0.118493802 | 1.415320146  | 0.162488743 |
| KLRB1       | 0.514396515  | 0.608276234 | -2.301828072 | 0.024980923 | -0.872858295 | 0.386452095 |
| KLRC1       | 0.973137772  | 0.333176946 | -1.605082601 | 0.113945307 | -1.534610464 | 0.130486782 |
| KLRC2       | 0.085910013  | 0.93173493  | -3.303445627 | 0.001645364 | -2.37856216  | 0.020800871 |
| KLRC3       | 0.438521239  | 0.662093148 | -3.516709239 | 0.000859488 | -3.479949991 | 0.000976265 |
| KLRC4       | 1.66679267   | 0.099144182 | -5.951454835 | 1.67E-07    | -5.542275042 | 8.25E-07    |
| KLRC4-KLRK1 | 1.680216033  | 0.096494991 | -0.555214206 | 0.580898212 | -0.569948889 | 0.570982351 |
| KLRD1       | 1.933367723  | 0.056435738 | -2.25213765  | 0.028141511 | -2.359872058 | 0.021776225 |
| KLRF1       | 0.927928878  | 0.356006182 | -2.536529496 | 0.013929346 | -1.991126498 | 0.051333429 |
| KLRG1       | 1.580827079  | 0.117538693 | -1.6979199   | 0.094920073 | -0.457172052 | 0.649308591 |
| KLRK1       | 1.930105163  | 0.056844722 | -2.747623858 | 0.008000442 | -1.926788575 | 0.059064442 |
| KMO         | -0.4927956   | 0.623395803 | 0.87041092   | 0.387689178 | 0.793525052  | 0.430807465 |
| KNDC1       | 1.070502151  | 0.287347844 | -3.032403728 | 0.003633533 | -2.498586926 | 0.015417116 |
| KNTC1       | 2.358817206  | 0.020568245 | 1.283782786  | 0.204358639 | 0.997373101  | 0.322855716 |
| KPNA1       | -0.215618433 | 0.829788792 | -0.033900851 | 0.973073427 | 0.570411954  | 0.570670457 |
| KPNA2       | -0.187437549 | 0.85175309  | 1.943324095  | 0.056869292 | 2.768806427  | 0.007606184 |
| KPNA3       | -0.188304969 | 0.851075178 | 0.445787626  | 0.657421918 | -0.004959397 | 0.996060541 |
| KPNA4       | -1.773660308 | 0.079610879 | -0.933171035 | 0.354627249 | -1.259771944 | 0.212954728 |
| KPNA5       | 1.526504903  | 0.13050376  | -0.901024251 | 0.371327664 | -1.146825532 | 0.256309719 |
| KPNA6       | 0.652429744  | 0.515840438 | 0.708739141  | 0.481345233 | 1.447684149  | 0.15325755  |
| KPNB1       | -1.451588227 | 0.150204947 | 0.974937823  | 0.333668114 | 0.243308576  | 0.808651696 |
| KPTN        | -2.746967671 | 0.007307021 | 1.581259974  | 0.119295049 | 0.602771316  | 0.549083962 |
| KRAS        | -0.254066949 | 0.800042045 | -1.317678484 | 0.192828645 | -1.807883229 | 0.075973393 |
| KRBA1       | 1.757546596  | 0.082334628 | 1.056294466  | 0.295244217 | 1.966676356  | 0.054162499 |
| KRBA2       | 1.534556589  | 0.128513697 | -0.031986138 | 0.974593691 | 0.335911963  | 0.738187331 |
| KRCC1       | -0.006724207 | 0.994650261 | -0.644047433 | 0.522101243 | -0.825115924 | 0.41279217  |
| KREMEN1     | -0.745057314 | 0.458240768 | 0.307977173  | 0.759210722 | -0.674284408 | 0.502892958 |
| KREMEN2     | -0.578498549 | 0.564418934 | 0.532574597  | 0.596376851 | 0.946366201  | 0.348010567 |
| KRI1        | 1.122402595  | 0.264772699 | 1.920969438  | 0.059689919 | 2.719639202  | 0.008677582 |
| KRIT1       | 1.089778507  | 0.278813536 | -0.259515423 | 0.796162949 | -0.038402447 | 0.969502812 |
| KRR1        | 0.224167931  | 0.823151102 | -1.082525493 | 0.283530391 | -1.377058796 | 0.173951054 |
| KRT1        | -3.05746314  | 0.002963559 | 0.997012027  | 0.322929    | 0.052253148  | 0.958512155 |
| KRT10       | -2.798901928 | 0.006311698 | -4.192049765 | 9.63E-05    | -3.717766592 | 0.000464945 |
| KRT18       | 0.411235688  | 0.681908787 | 2.963558166  | 0.004415837 | 2.873240792  | 0.005722665 |
| KRT23       | -3.433838613 | 0.000912756 | -0.980900423 | 0.330744254 | -0.750028982 | 0.456363723 |
| KRT5        | 1.239783094  | 0.218382124 | -0.369719914 | 0.712947136 | 0.682450952  | 0.4977554   |
| KRT72       | 1.27978005   | 0.204017382 | 2.374200749  | 0.020941496 | 2.062218334  | 0.043818213 |
| KRT73       | 3.249182505  | 0.001644799 | 2.02242816   | 0.0477843   | 1.19865525   | 0.235688794 |
| KRT74       | -0.619602492 | 0.53713537  | 1.190870668  | 0.238589117 | 0.418345218  | 0.677288027 |
| KRT81       | -0.713384249 | 0.477513183 | 0.572328666  | 0.569326656 | -0.058911886 | 0.953231135 |
| KRT86       | 0.085736595  | 0.931872388 | -0.245949555 | 0.806595644 | -0.272508733 | 0.78622899  |



|          |              |             |              |             |              |             |
|----------|--------------|-------------|--------------|-------------|--------------|-------------|
| KRTAP5-1 | 1.087156867  | 0.27996381  | -1.33274048  | 0.187865381 | -0.33973193  | 0.735323996 |
| KRTCAP2  | -0.921873935 | 0.359138263 | -2.99251474  | 0.004069421 | -1.826700399 | 0.073053855 |
| KRTCAP3  | 0.325456012  | 0.745615707 | 0.819729199  | 0.415749832 | 1.068693314  | 0.289773809 |
| KSR1     | 2.929914521  | 0.004327088 | -2.78694054  | 0.00719427  | -2.579192469 | 0.012544497 |
| KSR2     | -0.120860051 | 0.904079977 | 3.187629376  | 0.002319091 | 2.487847198  | 0.015841689 |
| KTI12    | -2.526895164 | 0.797864955 | -2.128969163 | 0.037544579 | -2.042914642 | 0.045758127 |
| KTN1     | 1.318831409  | 0.190679003 | 2.04135099   | 0.045806455 | 1.751858825  | 0.085249644 |
| KY       | -2.521643652 | 0.013498162 | -3.497198718 | 0.000912922 | -3.843667739 | 0.000310855 |
| KYNU     | -3.175339505 | 0.002069217 | 1.220634521  | 0.227198157 | 0.352969922  | 0.725430606 |
| L1CAM    | -0.568587949 | 0.57109744  | 0.717671348  | 0.475860767 | 1.43766575   | 0.156070293 |
| L1TD1    | -0.386888463 | 0.699781468 | 1.276613902  | 0.206861862 | 1.746648028  | 0.086158322 |
| L2HGDH   | 2.061555492  | 0.042228012 | -1.195485998 | 0.236796169 | -1.045593985 | 0.300222064 |
| L3MBTL1  | 3.522228389  | 0.000683504 | -0.772866842 | 0.442761382 | -1.469743972 | 0.147203753 |
| L3MBTL2  | -0.516764638 | 0.60662882  | 3.442084185  | 0.001081452 | 3.801957702  | 0.000355466 |
| L3MBTL3  | 1.939585515  | 0.055663193 | 1.366010104  | 0.177246033 | 0.268177027  | 0.789544316 |
| L3MBTL4  | 1.706113303  | 0.091546848 | 0.683511604  | 0.497024205 | 1.238456079  | 0.220691822 |
| LACC1    | 0.312464578  | 0.755433576 | -1.438559532 | 0.155687396 | -1.234357808 | 0.222202823 |
| LACE1    | -0.323334676 | 0.747216021 | 0.26999198   | 0.788131459 | -0.06625345  | 0.94741102  |
| LACTB    | 0.127506491  | 0.898833156 | 2.234233833  | 0.02936414  | 0.972845369  | 0.334796172 |
| LACTB2   | -0.05845071  | 0.953523379 | -0.821456985 | 0.414773387 | -1.407205421 | 0.164869556 |
| LAG3     | 0.078952654  | 0.937251206 | -1.049601449 | 0.298285619 | -0.236521131 | 0.813887706 |
| LAGE3    | 0.660590137  | 0.510616795 | -0.057014997 | 0.954730585 | 0.457902021  | 0.648787236 |
| LAIR1    | 2.541098685  | 0.012819471 | -0.922585587 | 0.360071913 | 0.920708391  | 0.361135527 |
| LAIR2    | 0.805809628  | 0.422544915 | -0.921650482 | 0.360555463 | -1.551394677 | 0.12641709  |
| LAMA2    | 1.802553272  | 0.074913717 | 0.237587964  | 0.813043811 | -0.020459011 | 0.983749627 |
| LAMA5    | 0.57531072   | 0.566562957 | -0.526243644 | 0.600739563 | 0.211612354  | 0.833174504 |
| LAMB2    | 0.057634586  | 0.954171582 | 2.643442596  | 0.010554147 | 2.923341623  | 0.004981596 |
| LAMB2P1  | 0.931992569  | 0.353913985 | 0.407264812  | 0.685323197 | 1.771445458  | 0.081904939 |
| LAMB3    | -1.722545589 | 0.088516143 | 2.939328896  | 0.004726566 | 2.283141715  | 0.026222116 |
| LAMC1    | -0.363248096 | 0.717298777 | 1.521232983  | 0.133672768 | 1.662346805  | 0.102007925 |
| LAMC3    | 1.896882298  | 0.061154113 | 1.873898129  | 0.066020148 | 0.730200018  | 0.468298946 |
| LAMP1    | -1.965854313 | 0.052497555 | 1.026701589  | 0.308853639 | 0.66328377   | 0.509858682 |
| LAMP2    | -2.008375353 | 0.047698139 | -0.602351061 | 0.549304642 | -1.520069204 | 0.134096402 |
| LAMP3    | -3.157919395 | 0.002183259 | 0.313579072  | 0.754973602 | -1.81758243  | 0.07445655  |
| LAMTOR1  | -3.023610511 | 0.003280158 | 0.326925813  | 0.744909155 | -0.005098602 | 0.995949965 |
| LAMTOR2  | -1.028237937 | 0.306682037 | -0.177975092 | 0.859367018 | -0.173584065 | 0.862815673 |
| LAMTOR3  | -0.613788496 | 0.540953227 | -1.822570618 | 0.073560625 | -2.191144472 | 0.032600475 |
| LANCL1   | 1.218889477  | 0.226173696 | -2.238370253 | 0.029077577 | -1.85616919  | 0.068671394 |
| LANCL2   | 1.568178947  | 0.120461684 | 1.117792479  | 0.268296445 | 1.833416213  | 0.072034959 |
| LANCL3   | 0.027097589  | 0.978443824 | 0.383823012  | 0.702522896 | -0.57314986  | 0.568828065 |
| LAP3     | -1.181514532 | 0.240611041 | 2.712393376  | 0.008792494 | -0.049334921 | 0.960827194 |
| LAPTM4A  | -0.453092417 | 0.651607761 | -2.779119574 | 0.007348416 | -2.956474937 | 0.00454155  |
| LAPTM4B  | 0.165855604  | 0.868654573 | 2.013549361  | 0.048737439 | 2.176815439  | 0.033708136 |
| LAPTM5   | -3.546788301 | 0.000630201 | -0.800948094 | 0.426453431 | -0.43246987  | 0.667053866 |
| LARGE    | -0.566320286 | 0.572630924 | 0.226114873  | 0.821912581 | 1.092064367  | 0.279461279 |
| LARP1    | 0.512665128  | 0.609481977 | 1.361308763  | 0.178718206 | 1.248353759  | 0.217073852 |
| LARP1B   | 1.143885783  | 0.255801836 | -0.680027249 | 0.499211488 | 0.326853348  | 0.744992262 |
| LARP4    | 1.662877762  | 0.099927843 | -0.117080572 | 0.907203518 | -0.750833065 | 0.455883471 |
| LARP4B   | -1.008455728 | 0.316026254 | 0.475764547  | 0.636041728 | -0.195862445 | 0.845423846 |
| LARP7    | 0.394869106  | 0.693903821 | -0.152538407 | 0.87929541  | -0.057360189 | 0.9544616   |
| LARS     | 1.641091653  | 0.104381076 | 3.608519275  | 0.000645586 | 3.524555763  | 0.000851099 |
| LARS2    | 0.43361624   | 0.665638125 | 2.806040025  | 0.006830265 | 2.471725897  | 0.016498847 |
| LAS1L    | 1.318284575  | 0.19086116  | 2.157073119  | 0.035185637 | 2.507132074  | 0.015086676 |
| LASP1    | -2.777578718 | 0.006704301 | 0.086856577  | 0.931086774 | 0.008957916  | 0.992884415 |
| LAT      | -0.089685578 | 0.928742779 | 0.706250061  | 0.482879821 | 1.653919332  | 0.103715791 |
| LAT2     | -2.210967946 | 0.029654927 | 0.333707451  | 0.739812237 | 0.407106858  | 0.685474941 |
| LATS1    | -0.242206614 | 0.809188876 | -1.235015036 | 0.221839318 | -2.053745807 | 0.044660699 |
| LATS2    | -1.193174173 | 0.236037892 | -0.487069411 | 0.628057718 | -2.381417024 | 0.020655381 |
| LAX1     | 2.247382556  | 0.027139574 | -0.360581022 | 0.719731754 | 0.548350957  | 0.58562128  |
| LAYN     | 0.021088094  | 0.983223568 | 1.943315623  | 0.056870339 | 1.213184639  | 0.230130469 |
| LBH      | 0.447272161  | 0.655787752 | -0.400767634 | 0.690074033 | 0.49607905   | 0.621771992 |
| LBR      | -1.43163647  | 0.155822894 | 0.037528889  | 0.970193079 | -1.019086254 | 0.312526246 |
| LCA5L    | -2.698440609 | 0.008364441 | -1.224884284 | 0.225604732 | 0.972820004  | 0.334808669 |
| LCAT     | -0.960210745 | 0.339604458 | -1.320450077 | 0.191907993 | -0.017903088 | 0.985779533 |
| LCK      | 0.335146374  | 0.738319687 | -1.447139137 | 0.153278979 | -0.098611271 | 0.921797577 |
| LCLAT1   | 0.219131006  | 0.827060163 | -1.159324515 | 0.251107656 | -0.738895991 | 0.463043035 |
| LCMT1    | 0.064762381  | 0.94851145  | 2.133429064  | 0.03716125  | 2.912700785  | 0.005131111 |
| LCMT2    | 1.329999398  | 0.186987236 | -1.088074395 | 0.281094409 | -0.524731858 | 0.601832093 |
| LCN10    | -1.435624908 | 0.154687058 | -0.845217321 | 0.401487024 | -0.007071733 | 0.994382647 |
| LCN2     | -4.375748128 | 3.34E-05    | 0.200980434  | 0.841421931 | -0.224277882 | 0.823353938 |
| LCN8     | 0.424684216  | 0.672113061 | 0.219057426  | 0.827379734 | 0.567420719  | 0.57268665  |
| LCNL1    | 0.337424304  | 0.736608045 | -0.194390444 | 0.846554191 | -1.343458304 | 0.184519802 |

|          |              |             |              |             |              |             |
|----------|--------------|-------------|--------------|-------------|--------------|-------------|
| LCOR     | -0.031976713 | 0.974563709 | -1.985763977 | 0.051826729 | -2.834473922 | 0.00636477  |
| LCORL    | -0.548946991 | 0.584444932 | -0.823531335 | 0.413602923 | -1.935437112 | 0.057970619 |
| LCP1     | -2.257822845 | 0.02645385  | 1.15027066   | 0.254785913 | 1.108304905  | 0.272447708 |
| LCP2     | -1.03621031  | 0.302969423 | -2.675280922 | 0.009704081 | -2.897798067 | 0.005347518 |
| LDB1     | 0.81290074   | 0.418489161 | -3.424630938 | 0.001140709 | -3.331139136 | 0.001532578 |
| LDB2     | -0.466106753 | 0.642301482 | -2.757078486 | 0.007799333 | -0.958853797 | 0.341736756 |
| LDHA     | 0.318696793  | 0.750718647 | 2.616402372  | 0.011328895 | 2.687590488  | 0.009448737 |
| LDHAL6A  | -0.3163892   | 0.752463343 | -0.045074312 | 0.96420399  | 0.199117749  | 0.842888811 |
| LDHB     | 1.637793476  | 0.105069014 | 3.373510347  | 0.001332494 | 4.164608748  | 0.000108291 |
| LDHC     | -0.88870668  | 0.37660604  | 1.442698476  | 0.154521881 | 1.500947421  | 0.138963233 |
| LDHD     | 0.671620513  | 0.503600973 | 1.854548275  | 0.068782377 | 0.0965959    | 0.923390736 |
| LDLR     | 3.395822482  | 0.001032173 | -0.882564119 | 0.38114053  | -0.780538475 | 0.438347175 |
| LDLRAD2  | 0.305339935  | 0.760835028 | 0.557381953  | 0.579426307 | 0.586908253  | 0.559614201 |
| LDLRAD3  | -0.73349853  | 0.465222152 | 0.047123505  | 0.962577811 | 0.296703777  | 0.767785754 |
| LDLRAP1  | 1.577715909  | 0.118252383 | 2.104242767  | 0.039733054 | 3.047609571  | 0.003510649 |
| LDOC1    | 0.843494287  | 0.401260277 | -0.789607901 | 0.432995473 | 0.30572973   | 0.760939312 |
| LDOC1L   | 0.891615961  | 0.375052836 | -1.10328779  | 0.274490618 | -0.320311284 | 0.749919509 |
| LEAP2    | 0.195342102  | 0.845579648 | 1.341177086  | 0.185127928 | 1.939949594  | 0.057406797 |
| LEF1     | 2.367225004  | 0.020135107 | 0.857106727  | 0.3949382   | 1.811667536  | 0.075378519 |
| LEFTY1   | -3.361106247 | 0.001153934 | 0.068005174  | 0.94601705  | -0.482486085 | 0.631333461 |
| LEMD2    | 2.059464531  | 0.04243243  | 0.550626686  | 0.584019058 | 1.164909375  | 0.248933347 |
| LEMD3    | 0.872133517  | 0.385530904 | -0.347769454 | 0.729281086 | -1.761641208 | 0.083565244 |
| LENG1    | -1.107414116 | 0.27116073  | 1.099486717  | 0.2761303   | 1.681849234  | 0.098143726 |
| LENG8    | 2.323904958  | 0.022456463 | -1.87880126  | 0.065335301 | -0.749857627 | 0.456466105 |
| LENG9    | -0.646370416 | 0.519737312 | -0.225096955 | 0.822700584 | -1.543928352 | 0.128214756 |
| LEO1     | 0.219750388  | 0.826579236 | 1.616465329  | 0.111458455 | 2.280205485  | 0.026407215 |
| LEP      | 0.062398713  | 0.950388144 | 0.665403371  | 0.508448491 | 1.104569814  | 0.274049677 |
| LEPR     | -0.607258172 | 0.545257859 | -0.822466035 | 0.414203774 | -2.240526919 | 0.029024592 |
| LEPRE1   | 2.789684754  | 0.006478747 | 0.410058535  | 0.683284289 | 0.209330629  | 0.834946596 |
| LEPREL1  | 2.259958346  | 0.02631548  | -0.163568831 | 0.870643189 | 0.747690773  | 0.457761915 |
| LEPREL2  | 0.959674368  | 0.339872889 | 0.978654018  | 0.331843813 | 1.956928018  | 0.055327158 |
| LEPREL4  | -0.58443622  | 0.560436087 | 0.126613754  | 0.899687084 | 0.796132336  | 0.429303098 |
| LEPROT   | -1.262664993 | 0.210076225 | -1.386748706 | 0.170862418 | -1.591664519 | 0.117066227 |
| LEPROTL1 | 0.970239839  | 0.334610852 | -0.857500248 | 0.394722583 | -1.289035523 | 0.202662924 |
| LETM1    | 0.879196303  | 0.38171154  | 2.741780496  | 0.008127107 | 2.578122553  | 0.012579673 |
| LETM2    | -1.178934716 | 0.241631421 | -2.697121971 | 0.009157658 | -1.008738285 | 0.317420829 |
| LETMD1   | 2.479250016  | 0.015090098 | 1.402603279  | 0.166102499 | 2.756717196  | 0.007857702 |
| LFNG     | -0.994241239 | 0.322856752 | -0.92185826  | 0.360447983 | -0.29241162  | 0.771048055 |
| LGALS1   | -0.690098987 | 0.491964807 | -0.934373683 | 0.354012054 | -1.015186368 | 0.314364863 |
| LGALS12  | -3.353105906 | 0.001183847 | 1.527271154  | 0.132166937 | 0.845493288  | 0.401418539 |
| LGALS2   | -1.055006397 | 0.294337117 | -2.655146443 | 0.010234059 | -2.364773497 | 0.021516564 |
| LGALS3   | -0.757489053 | 0.450799293 | -0.432135327 | 0.667256622 | -0.18841588  | 0.851228925 |
| LGALS3BP | -0.79421736  | 0.429225321 | 3.21661765   | 0.002129558 | 2.210239724  | 0.031174192 |
| LGALS4   | 1.283768733  | 0.202624132 | -2.803712645 | 0.006873694 | -0.500661634 | 0.618563153 |
| LGALS8   | 0.326167551  | 0.745079179 | -0.470659139 | 0.63966175  | -1.141996044 | 0.258294809 |
| LGALS9   | -2.761481359 | 0.00701534  | 0.584195494  | 0.561370015 | 0.365946441  | 0.715778074 |
| LGALS9B  | 0.710769816  | 0.479123928 | -1.851014167 | 0.069297262 | -0.986099219 | 0.328308159 |
| LGALS9C  | -1.715017393 | 0.089894247 | -0.739407419 | 0.462662618 | 0.09051646   | 0.928198444 |
| LGI2     | -0.663253931 | 0.508917754 | 1.73799597   | 0.087555632 | 0.971225603  | 0.335594858 |
| LGI4     | 0.797945893  | 0.427069853 | -0.784329162 | 0.436060943 | -0.868767636 | 0.388666864 |
| LGMN     | 1.557134091  | 0.123061237 | 3.05493515   | 0.003406982 | 2.488467841  | 0.015816868 |
| LGR4     | 1.438310632  | 0.153925823 | -0.882971903 | 0.380922014 | -1.248033538 | 0.217190215 |
| LGR6     | 1.229751107  | 0.222098386 | -1.498270534 | 0.13952398  | -0.091188423 | 0.927666911 |
| LGSN     | -1.453055967 | 0.149797951 | -0.540671308 | 0.590819023 | 1.015635402  | 0.314152793 |
| LHFPL2   | -2.463643993 | 0.015717224 | 2.698472024  | 0.009124825 | 0.690685262  | 0.492604392 |
| LHPP     | -0.527058188 | 0.599491676 | 0.118049412  | 0.906439235 | 0.793704656  | 0.430703735 |
| LHX4     | 1.496911395  | 0.138027729 | 0.963433216  | 0.339357803 | 1.047746535  | 0.299237663 |
| LIAS     | 1.045081297  | 0.298874209 | -0.495041911 | 0.622453836 | 0.831451216  | 0.409235286 |
| LIF      | -2.80953626  | 0.006123869 | -2.102238145 | 0.039915252 | -1.919166416 | 0.06004299  |
| LIG1     | 2.138772384  | 0.035250387 | 1.897835733  | 0.062733354 | 2.305182298  | 0.02486906  |
| LIG3     | 1.104554386  | 0.272391639 | 1.066000287  | 0.290871739 | 1.855547738  | 0.068761471 |
| LIG4     | -0.152550418 | 0.879105302 | -0.432866477 | 0.666728414 | -1.461620203 | 0.149410925 |
| LILRA1   | -1.107768943 | 0.271008273 | -1.638504745 | 0.106768381 | -2.796048856 | 0.007066332 |
| LILRA2   | -3.375627323 | 0.001101446 | 0.120529216  | 0.904483414 | -0.407809758 | 0.684961768 |
| LILRA3   | -2.732290305 | 0.007613209 | 1.119874337  | 0.267415544 | 1.019389022  | 0.31238381  |
| LILRA4   | 1.370952615  | 0.173908429 | 0.386016229  | 0.700906876 | 0.098590073  | 0.921814332 |
| LILRA5   | -4.039207501 | 0.000115084 | 1.925769822  | 0.059074382 | 0.804247076  | 0.424641115 |
| LILRA6   | -1.899890104 | 0.060752951 | -0.127285269 | 0.899157967 | -0.213583554 | 0.831644279 |
| LILRB1   | -0.128114475 | 0.898353423 | -0.25736083  | 0.797817475 | -0.317205135 | 0.752262636 |
| LILRB2   | -2.679967765 | 0.008802291 | -0.018616614 | 0.985211291 | -1.127396186 | 0.264362336 |
| LILRB3   | -2.79013531  | 0.006470489 | -0.115931613 | 0.908110005 | -0.542499641 | 0.589617859 |
| LILRB4   | -1.339309822 | 0.183950779 | 1.350806769  | 0.182040481 | 1.079899544  | 0.284796636 |

|              |              |             |              |             |              |             |
|--------------|--------------|-------------|--------------|-------------|--------------|-------------|
| LILRB5       | -1.011144717 | 0.314745047 | -0.79136425  | 0.43197837  | -0.544866679 | 0.587999564 |
| LIM2         | -0.14306921  | 0.886565646 | -3.397185569 | 0.001240158 | -2.322659739 | 0.023840638 |
| LIMA1        | 3.091879479  | 0.002670953 | 0.028361371  | 0.977471976 | 1.958838124  | 0.055097279 |
| LIMD1        | 2.610836596  | 0.010631835 | 1.509368178  | 0.136671328 | 1.760664606  | 0.083732149 |
| LIMD2        | -0.827338965 | 0.410303632 | -0.601128068 | 0.550113249 | -0.406945216 | 0.685592975 |
| LIME1        | 1.186987708  | 0.238456502 | -0.367613038 | 0.714509216 | 0.398304002  | 0.691914294 |
| LIMK1        | -1.003165354 | 0.318557083 | -0.366767798 | 0.71513624  | -0.838732363 | 0.405170569 |
| LIMK2        | -0.416512006 | 0.678058969 | 0.577868724  | 0.565605207 | -0.216585438 | 0.829315205 |
| LIMS1        | -2.199671366 | 0.030475628 | -0.012920982 | 0.989735488 | -1.043269529 | 0.301287567 |
| LIMS2        | -1.589028801 | 0.115673727 | 1.273933852  | 0.207803522 | 2.337149885  | 0.023016898 |
| LIN37        | -1.890693426 | 0.061986571 | 0.68348251   | 0.497042447 | 0.876621266  | 0.384421742 |
| LIN52        | 0.454803401  | 0.650381074 | -0.249328856 | 0.803993441 | -0.085670645 | 0.932032522 |
| LIN54        | -0.763666311 | 0.447127703 | -1.580026968 | 0.119577348 | -2.624991239 | 0.011138681 |
| LIN7A        | -2.084221528 | 0.040065974 | -1.073055916 | 0.287721363 | -2.6578602   | 0.01021971  |
| LIN7B        | 0.271673006  | 0.786515697 | 0.192625434  | 0.847929919 | 0.318836974  | 0.751031363 |
| LIN7C        | 0.527030662  | 0.59951071  | -0.427580432 | 0.670551034 | -0.917981488 | 0.362548955 |
| LIN9         | 0.129127497  | 0.897554177 | -1.230724481 | 0.223428361 | -0.957606452 | 0.342360066 |
| LINGO2       | 1.286923151  | 0.201527293 | -0.944137059 | 0.349043397 | -1.296113311 | 0.200230515 |
| LINGO3       | 0.698311733  | 0.486840609 | -2.704613115 | 0.008976831 | -2.650965442 | 0.010406531 |
| LINS         | 0.881979802  | 0.380212808 | -0.056180286 | 0.955392624 | -0.333569718 | 0.739944858 |
| LIPA         | 1.584420205  | 0.116718728 | 0.804090045  | 0.424651388 | 0.833442827  | 0.408120996 |
| LIPC         | -0.752284799 | 0.45390599  | -0.392065809 | 0.696456598 | -1.683008547 | 0.097917853 |
| LIPE         | 0.586048247  | 0.559357173 | 0.316445204  | 0.752808652 | 0.807578919  | 0.422735775 |
| LIPN         | -2.93715265  | 0.004236354 | 0.281714775  | 0.779171947 | -0.764783824 | 0.447597751 |
| LIPT1        | 2.138496975  | 0.035273379 | -0.134521094 | 0.893459512 | 0.281157825  | 0.77962125  |
| LIPT2        | 0.218917052  | 0.827226306 | -1.838606341 | 0.071130753 | -2.645757808 | 0.0105497   |
| LITAF        | -3.532739843 | 0.000660189 | -0.129480425 | 0.89742863  | -0.669111899 | 0.506161801 |
| LIX1         | 0.879996621  | 0.381280244 | -0.169136281 | 0.866282061 | 0.470714588  | 0.63966526  |
| LIX1L        | 1.658920783  | 0.100725023 | -1.387218479 | 0.170719889 | -1.929578986 | 0.058709618 |
| LLGL1        | 0.533268944  | 0.59520418  | 0.04230795   | 0.966399534 | 0.294803112  | 0.769229858 |
| LLGL2        | 1.217782123  | 0.226592208 | -2.148293162 | 0.035908259 | -1.014662066 | 0.314612603 |
| LLPH         | -0.942428391 | 0.348577383 | -1.163790755 | 0.249307254 | -0.362074943 | 0.718653078 |
| LMAN1        | 1.949445785  | 0.054456462 | -0.622255193 | 0.536229781 | -1.076738772 | 0.286194422 |
| LMAN2        | -1.005339773 | 0.317515247 | -0.552680768 | 0.582620696 | -0.882296325 | 0.3813724   |
| LMAN2L       | -0.688059897 | 0.493241609 | 1.989410726  | 0.051411914 | 3.852540154  | 0.000302086 |
| LMBR1        | -0.434252878 | 0.665177577 | -2.557129244 | 0.013211376 | -3.714745483 | 0.00046942  |
| LMBR1L       | 0.869200742  | 0.387123826 | -2.445932141 | 0.017524604 | -0.663129699 | 0.509956608 |
| LMBRD1       | -0.560334834 | 0.57668805  | -1.575729386 | 0.120565486 | -1.949366567 | 0.056245241 |
| LMBRD2       | 0.157028415  | 0.875585514 | -0.354375843 | 0.724351401 | -3.03420111  | 0.003647212 |
| LMF1         | 0.202053785  | 0.04639633  | 0.472413505  | 0.638416807 | 1.230719854  | 0.223550469 |
| LMF2         | -0.180560426 | 0.857131653 | -0.7359003   | 0.464777866 | -0.209443962 | 0.834858556 |
| LMLN         | 1.884783683  | 0.062790366 | 0.470857445  | 0.639520975 | 0.246871236  | 0.805906869 |
| LMNA         | -2.269675871 | 0.025693835 | 1.868990482  | 0.066711695 | 1.007925358  | 0.317807517 |
| LMMNB1       | -1.438605528 | 0.153842416 | 0.98982665   | 0.326399069 | -0.391626866 | 0.696813999 |
| LMMNB2       | -0.05240303  | 0.958327437 | 0.668268347  | 0.506631646 | -1.194408325 | 0.237331763 |
| LMO2         | -1.215873237 | 0.227314968 | -2.392257818 | 0.020029394 | -2.919465467 | 0.005035585 |
| LMO4         | -1.526917926 | 0.130401088 | -2.262759676 | 0.027437616 | -2.840347692 | 0.006263381 |
| LMO7         | 3.284738522  | 0.001470883 | 0.756021624  | 0.452717307 | 1.573627213  | 0.1211833   |
| LMOD1        | -0.949468084 | 0.345007005 | 0.157820781  | 0.875150024 | 0.461201069  | 0.64643321  |
| LMOD3        | 1.359080954  | 0.177626138 | -0.520997695 | 0.604365762 | -0.55574317  | 0.580590776 |
| LMTK2        | -2.26090462  | 0.026254369 | 0.450815123  | 0.653815424 | -0.528255987 | 0.599400175 |
| LMTK3        | 1.415440397  | 0.16050149  | -1.960027006 | 0.054836776 | -0.367149927 | 0.714885197 |
| LNP1         | 2.334361058  | 0.021875476 | -0.00971721  | 0.99228049  | 0.866325021  | 0.389993124 |
| LNPEP        | -0.158553944 | 0.874386987 | 0.409821458  | 0.683457221 | -1.674756507 | 0.099534951 |
| LNX1         | 0.183128074  | 0.855122705 | -1.312524932 | 0.194549369 | -2.422159114 | 0.01867611  |
| LNX2         | 0.914450213  | 0.363002346 | 0.239944825  | 0.811224944 | 0.501290423  | 0.618123439 |
| LOC100009676 | 0.945501242  | 0.347015972 | -0.940763546 | 0.350755041 | -2.230645705 | 0.029711051 |
| LOC100124692 | -2.895474154 | 0.004783875 | -0.848205907 | 0.399834613 | -3.098967373 | 0.003030552 |
| LOC100125556 | 0.457325192  | 0.648574837 | -0.14811469  | 0.882769578 | 1.375014801  | 0.174580424 |
| LOC100128071 | 0.565744256  | 0.573020775 | -3.402967165 | 0.001218549 | -2.38381513  | 0.020533873 |
| LOC100128164 | -0.451780223 | 0.652549186 | 2.090571447  | 0.040990127 | 2.244607527  | 0.028745222 |
| LOC100128191 | 0.916456609  | 0.361955406 | -0.772371625 | 0.443052222 | 0.897044661  | 0.373519317 |
| LOC100128239 | 1.469048269  | 0.14541866  | -0.00908916  | 0.992779409 | 0.972008573  | 0.335208628 |
| LOC100128252 | -0.003723226 | 0.997037808 | -1.473216307 | 0.146137038 | 0.695347946  | 0.489700691 |
| LOC100128288 | 2.016227114  | 0.046854205 | -0.32253618  | 0.748214437 | 0.883483597  | 0.380736385 |
| LOC100128361 | 0.891561391  | 0.375081933 | -0.042123988 | 0.966545547 | -1.561750503 | 0.123957142 |
| LOC100128398 | -0.149857295 | 0.881223321 | -2.088682185 | 0.041166536 | -0.84138651  | 0.403695069 |
| LOC100128420 | 1.909084561  | 0.059540379 | -1.538045337 | 0.129513545 | -0.020524338 | 0.983697746 |
| LOC100128542 | 0.544462688  | 0.58751293  | -1.284567359 | 0.204086061 | -0.658687921 | 0.512784108 |
| LOC100128573 | 0.922597075  | 0.358763276 | 0.504967822  | 0.615508181 | 0.898005893  | 0.373011079 |
| LOC100128682 | -0.606556455 | 0.545721441 | -0.239856009 | 0.811293468 | -0.790819654 | 0.432371756 |
| LOC100128822 | -0.987001478 | 0.326373051 | -1.453650885 | 0.151470526 | -2.366386518 | 0.021431719 |

|              |              |             |              |             |              |             |
|--------------|--------------|-------------|--------------|-------------|--------------|-------------|
| LOC100128881 | 0.752950256  | 0.45350806  | -1.630572808 | 0.108437502 | -1.708369282 | 0.093082527 |
| LOC100129034 | -0.944658864 | 0.34744356  | -0.229340857 | 0.81941646  | -1.297923559 | 0.199611919 |
| LOC100129083 | 1.946199957  | 0.054851222 | -3.128169768 | 0.002758505 | -1.579101381 | 0.119921686 |
| LOC100129196 | 1.919592911  | 0.058179607 | -0.781495619 | 0.437711721 | -0.667148487 | 0.507405607 |
| LOC100129250 | -2.077318459 | 0.040714089 | -3.995591711 | 0.000185546 | -2.801413509 | 0.006964277 |
| LOC100129269 | -0.937790158 | 0.350942799 | -1.835840858 | 0.07154492  | -1.268328096 | 0.209906627 |
| LOC100129316 | 1.058703543  | 0.292659099 | -0.371791976 | 0.711412071 | 0.196768198  | 0.844718334 |
| LOC100129361 | 0.033382739  | 0.973445679 | -1.093825596 | 0.278585044 | -0.862027917 | 0.392333158 |
| LOC100129387 | 3.782589438  | 0.000283913 | 2.149405642  | 0.035815985 | 0.808499408  | 0.422210294 |
| LOC100129534 | 0.547528988  | 0.585414258 | -0.938841025 | 0.351732924 | -0.457529473 | 0.649053293 |
| LOC100129550 | 0.876624574  | 0.383099519 | -0.777340931 | 0.440138837 | -0.081340712 | 0.93545498  |
| LOC100129716 | -0.850341208 | 0.397464551 | -1.369965974 | 0.176014492 | -2.541807746 | 0.013810515 |
| LOC100129722 | 0.42605665   | 0.67111654  | 1.119815305  | 0.267440495 | 1.910755705  | 0.061138758 |
| LOC100129726 | 1.791619672  | 0.07666634  | -1.979485057 | 0.052547686 | -1.515636095 | 0.135212482 |
| LOC100129827 | -1.858248118 | 0.066508348 | -1.68611245  | 0.097184529 | -0.245291818 | 0.80712342  |
| LOC100129845 | -0.378014164 | 0.706338818 | 0.409984305  | 0.683338433 | -0.226204021 | 0.821862896 |
| LOC100129917 | 2.704482753  | 0.008225588 | -1.783474248 | 0.079778029 | -2.004164189 | 0.049877463 |
| LOC100129931 | 1.365935149  | 0.175472412 | -0.550996531 | 0.58376716  | -1.800214341 | 0.077190968 |
| LOC100129961 | 1.034032996  | 0.303980335 | -1.219185718 | 0.227743256 | 0.176814446  | 0.860289395 |
| LOC100130000 | 0.670546544  | 0.504281784 | -1.175746924 | 0.244533183 | -1.936198647 | 0.057875137 |
| LOC100130015 | 0.580388545  | 0.563149667 | 0.525798396  | 0.601046943 | 0.248049718  | 0.804999453 |
| LOC100130093 | 0.075625431  | 0.939890359 | -0.107545344 | 0.914730106 | -0.488972985 | 0.626762453 |
| LOC100130231 | 2.154373878  | 0.03396903  | -2.244864753 | 0.028632632 | -0.867091775 | 0.389576497 |
| LOC100130298 | -0.859224581 | 0.392572828 | 1.12249527   | 0.266309448 | 0.483495201  | 0.630621428 |
| LOC100130357 | -0.540982926 | 0.589898869 | -0.120950718 | 0.904151035 | 0.944982369  | 0.34871041  |
| LOC100130451 | -0.782334987 | 0.436137306 | 0.28686747   | 0.775243267 | -0.794706985 | 0.430125117 |
| LOC100130557 | 0.914404483  | 0.363026231 | -2.62545533  | 0.011063923 | -2.533619785 | 0.014102702 |
| LOC100130581 | 0.104682184  | 0.91686844  | 0.266963517  | 0.790450793 | 1.292919231  | 0.201325495 |
| LOC100130691 | 1.649026793  | 0.102740859 | -0.42038534  | 0.675768265 | -1.503226479 | 0.138375941 |
| LOC100130705 | 1.085656276  | 0.280623686 | -0.616542425 | 0.539965948 | -1.038341184 | 0.303555207 |
| LOC100130776 | 0.521401327  | 0.603409137 | 0.263134633  | 0.793385852 | 1.065392009  | 0.291251463 |
| LOC100130855 | 0.540602609  | 0.590159913 | -1.153482137 | 0.253476828 | -1.521840021 | 0.13365263  |
| LOC100130872 | 1.372874848  | 0.173312068 | -2.21527581  | 0.030709646 | -1.015787337 | 0.314081059 |
| LOC100130890 | 1.151739847  | 0.252576411 | 0.36470523   | 0.716667141 | 0.426229331  | 0.671567815 |
| LOC100130932 | 1.019103442  | 0.310973376 | 0.063154315  | 0.949862289 | 0.8900102    | 0.377252074 |
| LOC100130950 | 1.944210622  | 0.055094364 | 1.754889208  | 0.084596245 | 2.705663349  | 0.009006481 |
| LOC100130987 | 1.600018084  | 0.113212087 | -0.184934466 | 0.853930102 | -0.6361907   | 0.527233012 |
| LOC100130992 | 0.579695526  | 0.563614917 | -2.021483974 | 0.047884889 | -2.379634382 | 0.020746121 |
| LOC100131067 | 1.253970847  | 0.213204292 | -0.194870398 | 0.846180176 | 1.067605265  | 0.290260242 |
| LOC100131089 | 1.837427569  | 0.069553181 | -0.138766911 | 0.890118393 | -0.342753252 | 0.733061972 |
| LOC100131094 | 1.350499214  | 0.180350849 | -3.186130335 | 0.002329311 | -2.268046634 | 0.027186101 |
| LOC100131096 | 0.125554058  | 0.900373986 | 0.520575874  | 0.604657778 | 2.740521194  | 0.008206656 |
| LOC100131176 | -0.083156759 | 0.933917516 | -0.341602642 | 0.733893151 | -0.412289505 | 0.681694704 |
| LOC100131193 | 2.334480571  | 0.021868913 | -2.055585936 | 0.044365612 | -0.454784573 | 0.651014998 |
| LOC100131289 | 1.173856659  | 0.243648957 | -0.421859914 | 0.674697723 | 0.241598541  | 0.809970042 |
| LOC100131347 | 0.017449109  | 0.9861182   | -0.054060174 | 0.957074301 | 2.965136207  | 0.004432631 |
| LOC100131434 | 0.764040202  | 0.44690603  | -0.146212655 | 0.884264058 | -0.041246982 | 0.967245092 |
| LOC100131564 | 3.661747817  | 0.000428928 | -0.1704999   | 0.865214535 | 0.052593182  | 0.958242428 |
| LOC100131655 | -0.037301354 | 0.970329999 | -2.968953214 | 0.004349284 | -2.284012032 | 0.026167474 |
| LOC100131691 | 0.563155503  | 0.574774395 | -0.356943166 | 0.722438813 | -0.822299766 | 0.414379293 |
| LOC100131733 | 0.530966885  | 0.596791709 | -1.794402476 | 0.077997493 | 0.038516592  | 0.96941221  |
| LOC100132077 | 2.897573412  | 0.004754809 | -1.837041475 | 0.071364864 | -1.824403388 | 0.073405044 |
| LOC100132111 | -0.835523397 | 0.40570688  | 0.24021079   | 0.811019756 | -0.053551925 | 0.957481946 |
| LOC100132163 | 0.605566831  | 0.546375563 | -0.071995464 | 0.942854941 | -0.793644668 | 0.43073838  |
| LOC100132215 | 0.919249956  | 0.360501042 | -0.316006975 | 0.753139542 | -0.226592195 | 0.821562488 |
| LOC100132247 | -0.880751429 | 0.380873753 | -2.254035516 | 0.028014584 | -2.087626293 | 0.041373826 |
| LOC100132273 | 1.06935667   | 0.287860574 | -0.147553447 | 0.883210517 | -1.397296973 | 0.167813102 |
| LOC100132352 | -0.447240641 | 0.655810419 | -0.778151856 | 0.439664484 | 0.132083506  | 0.895389686 |
| LOC100132356 | 1.626673842  | 0.107415376 | -4.199216653 | 9.40E-05    | -4.456222405 | 4.02E-05    |
| LOC100132618 | 1.338710319  | 0.184145173 | -0.911199529 | 0.365988171 | -2.324512822 | 0.023733849 |
| LOC100132707 | -0.277397286 | 0.78213172  | -1.447432891 | 0.153197036 | -2.164442924 | 0.034691003 |
| LOC100132774 | -0.525263598 | 0.600733187 | 0.978083672  | 0.332123368 | 1.325914188  | 0.190228678 |
| LOC100132832 | 1.40847123   | 0.162547622 | 0.840680655  | 0.404003406 | -0.025757244 | 0.99542148  |
| LOC100132891 | -0.702734797 | 0.484093115 | -1.377673226 | 0.173633892 | -1.698048477 | 0.05026037  |
| LOC100133091 | 0.917710572  | 0.361302064 | -3.276811543 | 0.001781567 | -2.293345186 | 0.025587813 |
| LOC100133161 | 0.28227467   | 0.778401885 | -0.672518993 | 0.503942534 | -0.356991992 | 0.722433926 |
| LOC100133315 | 1.084779693  | 0.281009655 | -0.366717343 | 0.715173676 | 0.453813803  | 0.651709376 |
| LOC100133331 | 1.158657367  | 0.249759566 | 1.87140819   | 0.066370249 | 2.017896078  | 0.048382557 |
| LOC100133445 | 1.659602395  | 0.100587338 | -4.499396612 | 3.36E-05    | -4.898100484 | 8.56E-06    |
| LOC100133545 | 1.270359377  | 0.207336163 | 1.556921221  | 0.124967417 | 1.566958799  | 0.122734527 |
| LOC100133612 | -1.653613989 | 0.101802225 | 1.057587709  | 0.294659015 | 0.921647088  | 0.360649797 |
| LOC100133991 | 0.389738769  | 0.697680129 | -2.073350157 | 0.042622721 | -0.416876654 | 0.678355651 |

|              |              |             |              |             |              |             |
|--------------|--------------|-------------|--------------|-------------|--------------|-------------|
| LOC100134229 | -4.316717648 | 4.17E-05    | 0.537453044  | 0.59302521  | -0.113136352 | 0.910325365 |
| LOC100134368 | 1.012553716  | 0.314075097 | -1.120921523 | 0.266973219 | -1.175827376 | 0.244617703 |
| LOC100134713 | 0.096972962  | 0.922970431 | -4.162536849 | 0.00010638  | -2.86953857  | 0.005781291 |
| LOC100144603 | 1.129576391  | 0.261752879 | -2.554515839 | 0.013300564 | -3.155916144 | 0.00257039  |
| LOC100170939 | -0.369594828 | 0.712580565 | -0.573727186 | 0.568386091 | 0.231089212  | 0.818084202 |
| LOC100188949 | -1.501781102 | 0.136766768 | -2.380215388 | 0.020633639 | -0.760317381 | 0.45024088  |
| LOC100190939 | 2.028498794  | 0.045560808 | -1.936514614 | 0.057716184 | -0.302963169 | 0.763035814 |
| LOC100216545 | 0.131068606  | 0.896022992 | -2.962661475 | 0.004426989 | -2.125317079 | 0.037966389 |
| LOC100216546 | 1.609104973  | 0.111208457 | -1.757451273 | 0.084154754 | -0.963297478 | 0.339522272 |
| LOC100233209 | 1.34966842   | 0.180616295 | -0.848574285 | 0.399631225 | 0.560308959  | 0.57749411  |
| LOC100240735 | 1.300224074  | 0.196950787 | 1.40031904   | 0.166781903 | 0.173319695  | 0.863022484 |
| LOC100270804 | -0.110338872 | 0.912394214 | -1.002027313 | 0.320521657 | -0.689107276 | 0.49358923  |
| LOC100271722 | -0.237697794 | 0.812673175 | 2.064994455  | 0.04343498  | 1.104974637  | 0.273875731 |
| LOC100271836 | 1.576057994  | 0.118634111 | -1.302365402 | 0.197975363 | -1.354339869 | 0.181044922 |
| LOC100272216 | 0.619775821  | 0.537021762 | 1.512481993  | 0.135879273 | 0.946624159  | 0.347880213 |
| LOC100272217 | 2.330668038  | 0.022079139 | -0.337282873 | 0.737129731 | 0.148214216  | 0.882703879 |
| LOC100272228 | 2.701828802  | 0.008286318 | -1.838090528 | 0.071207849 | -0.973350261 | 0.334547473 |
| LOC100286793 | 1.395001128  | 0.166559072 | -2.010012474 | 0.049121661 | -2.004455094 | 0.049845387 |
| LOC100286844 | 0.847001159  | 0.399313415 | -0.680306007 | 0.499036306 | -0.424710852 | 0.672668022 |
| LOC100286979 | 0.399660526  | 0.690383949 | -0.767932156 | 0.445664519 | -0.288375768 | 0.774119347 |
| LOC100287015 | 1.413956165  | 0.160935589 | -1.838672435 | 0.071120879 | -0.836136908 | 0.406616637 |
| LOC100287036 | -3.896712252 | 0.000190851 | 2.376515131  | 0.020822553 | 1.578621395  | 0.120031883 |
| LOC100287042 | 0.28950666   | 0.772881003 | -3.728959489 | 0.000440977 | -3.942202528 | 0.00025824  |
| LOC100287177 | 0.831035778  | 0.408223446 | -0.4834477   | 0.630610737 | -1.757254821 | 0.08431707  |
| LOC100287216 | 1.774063876  | 0.079543631 | -0.397716588 | 0.692309352 | -1.671046429 | 0.100269087 |
| LOC100287482 | -0.541238024 | 0.589723804 | -3.194582904 | 0.002272233 | -1.937087212 | 0.057763898 |
| LOC100287559 | -1.214802104 | 0.227721262 | -3.168609447 | 0.002451941 | -2.560518129 | 0.013163332 |
| LOC100287616 | 2.24875582   | 0.027048495 | -3.087498261 | 0.003102786 | -2.259438403 | 0.027749778 |
| LOC100287722 | 0.768384351  | 0.444335123 | -0.992402526 | 0.325152209 | -0.347727263 | 0.729342908 |
| LOC100288069 | 0.479646258  | 0.63267995  | -0.585827773 | 0.560279913 | 0.175392542  | 0.861401198 |
| LOC100288123 | 2.242488344  | 0.027466367 | 0.685344428  | 0.495875767 | 1.140228986  | 0.25902386  |
| LOC100288432 | -0.816634685 | 0.416362936 | 0.115921279  | 0.908118158 | 0.308690362  | 0.758697739 |
| LOC100288615 | 2.852403675  | 0.005417511 | -0.526621799 | 0.600478557 | -0.831464892 | 0.409227628 |
| LOC100288637 | 1.487885832  | 0.140388891 | 0.160758166  | 0.872846399 | -0.843187574 | 0.402695701 |
| LOC100288778 | 0.242078457  | 0.80928786  | 0.516377397  | 0.607567813 | -0.653549039 | 0.516065801 |
| LOC100288842 | 2.097112486  | 0.03887948  | -1.332612599 | 0.187907109 | -1.043752607 | 0.301065917 |
| LOC100289019 | 2.185134383  | 0.031560899 | 0.748411385  | 0.457257366 | 1.764096839  | 0.083146789 |
| LOC100289187 | -0.110650834 | 0.912147544 | -1.784543996 | 0.079602251 | -0.513889687 | 0.609342514 |
| LOC100289230 | -0.180479921 | 0.857194656 | -2.282467717 | 0.0261728   | -2.009879738 | 0.049250482 |
| LOC100289341 | -0.010767267 | 0.991433729 | -2.307310853 | 0.024652267 | 0.032751426  | 0.747462763 |
| LOC100289473 | -1.6033935   | 0.112464467 | -0.213727116 | 0.83151465  | -3.041162428 | 0.003575705 |
| LOC100289495 | 1.037890699  | 0.302190786 | 0.705859037  | 0.483121146 | 0.011975302  | 0.990487702 |
| LOC100289511 | 1.182719994  | 0.240135312 | -1.989203262 | 0.051435436 | -2.043067093 | 0.04574252  |
| LOC100289561 | -0.903999081 | 0.368486897 | 0.134586194  | 0.893408269 | -0.43105304  | 0.668077619 |
| LOC100293516 | -0.43965889  | 0.661272031 | 1.834090525  | 0.071808102 | 3.680589996  | 0.00052297  |
| LOC100294145 | 0.950126548  | 0.344674264 | -1.378677551 | 0.173325505 | -1.526276042 | 0.132546074 |
| LOC100294362 | -0.260451052 | 0.795129989 | 0.531159349  | 0.597350825 | 0.631410064  | 0.530330651 |
| LOC100302650 | -0.469303827 | 0.640023963 | -1.628383827 | 0.108901842 | -1.135122924 | 0.261138737 |
| LOC100303728 | 0.80156291   | 0.424984997 | -3.245555874 | 0.001954959 | -2.737631443 | 0.008270394 |
| LOC100306951 | 2.568250325  | 0.011923623 | -1.227080992 | 0.224784305 | 0.2567254    | 0.798327674 |
| LOC100329109 | 0.243105715  | 0.808494532 | 0.363140061  | 0.717829638 | 0.947724095  | 0.347324735 |
| LOC100499177 | 0.465362385  | 0.642832245 | -0.944784745 | 0.3487154   | -1.105264151 | 0.273751379 |
| LOC100499194 | -1.446831194 | 0.151529942 | 0.639999668  | 0.524710601 | 0.120394458  | 0.904599792 |
| LOC100499405 | 3.169579223  | 0.002106297 | -3.625338791 | 0.000612357 | -2.364070812 | 0.021553619 |
| LOC100499466 | 2.350965646  | 0.02098017  | -0.645396444 | 0.521233137 | 0.123875175  | 0.901855807 |
| LOC100499484 | 0.643909236  | 0.521324547 | -1.847695349 | 0.069783736 | -1.23471567  | 0.22207058  |
| LOC100499489 | -0.303165982 | 0.76248556  | 0.012265474  | 0.9902562   | -0.568876183 | 0.571705185 |
| LOC100505483 | 1.864333973  | 0.065639723 | -1.838179194 | 0.071194592 | -0.853590758 | 0.396953073 |
| LOC100505549 | -0.507903824 | 0.612803324 | 0.052991482  | 0.957922065 | -0.020483544 | 0.983730144 |
| LOC100505576 | 0.73184919   | 0.466223217 | -2.225939451 | 0.029946279 | -2.558640887 | 0.013227    |
| LOC100505622 | 1.191637901  | 0.236636847 | -2.187205285 | 0.032801636 | -1.408281443 | 0.164552315 |
| LOC100505624 | 1.157020251  | 0.250424182 | 0.803410377  | 0.425040819 | 1.080019094  | 0.28474386  |
| LOC100505648 | 3.140297715  | 0.002304563 | -0.806251032 | 0.423414624 | -0.149388472 | 0.881781563 |
| LOC100505658 | 0.830181176  | 0.408703759 | 1.041200947  | 0.302133218 | 1.048021731  | 0.29911197  |
| LOC100505666 | 0.480760074  | 0.631891221 | -0.51993453  | 0.605101889 | -0.01185852  | 0.990580461 |
| LOC100505678 | 1.522699917  | 0.131452628 | -0.599992104 | 0.550864853 | -0.824861361 | 0.412935483 |
| LOC100505681 | 0.334449386  | 0.738843669 | -0.426541341 | 0.67130349  | -0.713358155 | 0.47857413  |
| LOC100505687 | 1.458006709  | 0.148431448 | -0.610110071 | 0.544188671 | -0.696782219 | 0.4888094   |
| LOC100505702 | -0.51623679  | 0.606995848 | -0.08046072  | 0.936149764 | -1.586267132 | 0.118286205 |
| LOC100505715 | -0.060664429 | 0.951765301 | -1.628530094 | 0.108870765 | -1.236754841 | 0.221318135 |
| LOC100505716 | 0.159015292  | 0.874024589 | -1.359011857 | 0.179440843 | -0.275614064 | 0.783854729 |
| LOC100505738 | 0.814959788  | 0.417315871 | -0.470944561 | 0.639459136 | -1.561115211 | 0.124106939 |

|              |              |             |              |              |              |             |
|--------------|--------------|-------------|--------------|--------------|--------------|-------------|
| LOC100505746 | 1.290336584  | 0.20034536  | -0.761225565 | 0.449627879  | -0.180109749 | 0.857713858 |
| LOC100505761 | 1.197338671  | 0.234419746 | 0.254355713  | 0.80012668   | 1.109546867  | 0.271916495 |
| LOC100505783 | -2.10032347  | 0.038588705 | 0.828171316  | 0.41099206   | 1.513907675  | 0.135649621 |
| LOC100505812 | -2.428552909 | 0.017213264 | -2.009916614 | 0.04913211   | -2.167107409 | 0.034477239 |
| LOC100505854 | -1.508442127 | 0.135056626 | -2.746778272 | 0.008018659  | -2.384808349 | 0.020483735 |
| LOC100505876 | 0.473162591  | 0.63727966  | -1.359202588 | 0.0179380752 | -0.012178516 | 0.990326292 |
| LOC100505881 | -1.907466716 | 0.059752249 | -0.222861558 | 0.824431723  | -0.418511057 | 0.677167507 |
| LOC100506023 | 0.721778186  | 0.472362129 | -4.37682326  | 5.13E-05     | -4.75855367  | 1.40E-05    |
| LOC100506033 | -1.687336625 | 0.09511325  | 0.302983113  | 0.76299436   | -0.757567865 | 0.45187248  |
| LOC100506035 | -6.700020786 | 1.96E-09    | 0.721785429  | 0.473346554  | -0.401149269 | 0.689830429 |
| LOC100506046 | -0.092685218 | 0.92636628  | -0.793868612 | 0.430530551  | 0.71961168   | 0.474744173 |
| LOC100506054 | 0.368349602  | 0.713505402 | -1.354287917 | 0.18093406   | -0.906472726 | 0.368553376 |
| LOC100506068 | 1.090324853  | 0.278574233 | -0.921141282 | 0.360818951  | 0.266472526  | 0.790849955 |
| LOC100506083 | 1.031822939  | 0.305008778 | 0.594604569  | 0.554436531  | 0.248407612  | 0.804723933 |
| LOC100506123 | 3.377736353  | 0.001094012 | 0.302751002  | 0.763170356  | 1.45902516   | 0.150121419 |
| LOC100506178 | 0.255724403  | 0.798765985 | 1.365350386  | 0.177452056  | 2.651623106  | 0.010388577 |
| LOC100506190 | -1.565581201 | 0.121069131 | -0.841527692 | 0.40353284   | -1.161681455 | 0.2502717   |
| LOC100506229 | -0.374078094 | 0.709254388 | 0.902164772  | 0.370726717  | -0.062804816 | 0.950144627 |
| LOC100506233 | 1.305894433  | 0.195023467 | -0.539962404 | 0.591304659  | -0.324277016 | 0.746931397 |
| LOC100506305 | 0.104916594  | 0.916682977 | 1.626439256  | 0.109315689  | 2.413122194  | 0.01909981  |
| LOC100506314 | -0.408531324 | 0.683885279 | 0.234855655  | 0.815153718  | 0.474329082  | 0.637101906 |
| LOC100506334 | 1.903240004  | 0.060308775 | 0.004784336  | 0.996199199  | -0.452404711 | 0.652717831 |
| LOC100506343 | -4.251089955 | 5.32E-05    | 0.622544578  | 0.536040878  | 0.432732417  | 0.666864228 |
| LOC100506428 | 0.401012358  | 0.689392093 | 0.19338802   | 0.847335467  | -0.625980442 | 0.53386028  |
| LOC100506436 | 0.589028382  | 0.557365302 | 1.539389589  | 0.129185491  | 0.441198718  | 0.66076079  |
| LOC100506469 | 0.893400976  | 0.374101851 | 0.382177223  | 0.703736465  | 1.988259112  | 0.051658497 |
| LOC100506472 | 2.405875668  | 0.018246431 | -0.181305254 | 0.856764504  | 1.782629263  | 0.08004465  |
| LOC100506548 | 1.307672408  | 0.194422052 | 1.738369186  | 0.087489337  | 3.269582119  | 0.00184111  |
| LOC100506585 | -5.102395372 | 1.94E-06    | 1.463890595  | 0.148660524  | 0.913264809  | 0.365002123 |
| LOC100506649 | -0.199889691 | 0.842032329 | -1.384359906 | 0.171588593  | -1.509449855 | 0.136782233 |
| LOC100506655 | -0.17370195  | 0.862502362 | -0.0371161   | 0.970520779  | -0.12151569  | 0.903715751 |
| LOC100506668 | 1.272791442  | 0.206475587 | 0.32013184   | 0.750026863  | 1.056157528  | 0.295412381 |
| LOC100506686 | 2.309534406  | 0.023277203 | -1.404578936 | 0.1655166    | -2.469541214 | 0.016589769 |
| LOC100506710 | 1.368395614  | 0.174704137 | -2.032524022 | 0.046720084  | -2.175248556 | 0.033831241 |
| LOC100506713 | -0.173743806 | 0.862469566 | -3.49161188  | 0.000928796  | -3.723772778 | 0.000456169 |
| LOC100506714 | -2.177358474 | 0.032155144 | 0.652964566  | 0.516377131  | 0.150358321  | 0.881019922 |
| LOC100506730 | 0.766752996  | 0.445299565 | -0.637031852 | 0.526628124  | 1.065310041  | 0.291288217 |
| LOC100506746 | 2.623603576  | 0.010270018 | 0.66970961   | 0.505718984  | 1.952776141  | 0.055829663 |
| LOC100506776 | 1.134108253  | 0.25985771  | -2.800777294 | 0.006928831  | -2.128575584 | 0.037683649 |
| LOC100506779 | -0.184623457 | 0.853953144 | -1.998479275 | 0.050392717  | -1.558538233 | 0.124716056 |
| LOC100506801 | 0.972852647  | 0.333317848 | 0.046326317  | 0.963210418  | 1.441242037  | 0.155061642 |
| LOC100506844 | -0.324632666 | 0.746236699 | -0.853374827 | 0.396986603  | -0.599859809 | 0.551009139 |
| LOC100506866 | 0.363229968  | 0.71731227  | -0.777398236 | 0.440105306  | -1.697221467 | 0.095183206 |
| LOC100506930 | 0.840809056  | 0.402754912 | -1.678503224 | 0.098667189  | -1.073045299 | 0.287833805 |
| LOC100506963 | 0.735701128  | 0.463887184 | -1.773711549 | 0.081397215  | -0.788501162 | 0.433715018 |
| LOC100506990 | 1.340102437  | 0.183694005 | 0.838321789  | 0.405315633  | 1.433738711  | 0.15718375  |
| LOC100507032 | 2.040556355  | 0.04431991  | -1.328974045 | 0.189097342  | -0.366323511 | 0.71549828  |
| LOC100507034 | 2.804767487  | 0.006207455 | 0.45440926   | 0.651242227  | 1.435474061  | 0.156690956 |
| LOC100507043 | 0.875944861  | 0.38346689  | 1.285834585  | 0.203646372  | 0.616203603  | 0.540246864 |
| LOC100507053 | 1.968052765  | 0.052239705 | -0.197719353 | 0.843960799  | -0.583372662 | 0.561974841 |
| LOC100507062 | 0.691323075  | 0.491199197 | -0.286204321 | 0.775748557  | 0.045551628  | 0.963828994 |
| LOC100507173 | 1.160392647  | 0.249056469 | 0.387612724  | 0.699731408  | 1.418455748  | 0.161575942 |
| LOC100507178 | 1.188730161  | 0.237773493 | 0.791172379  | 0.432089414  | 1.956049423  | 0.055433171 |
| LOC100507206 | 0.7391345    | 0.461810594 | -2.215197805 | 0.030715293  | -1.596984233 | 0.115873751 |
| LOC100507217 | -2.082725478 | 0.040205674 | 0.144309373  | 0.88575994   | -0.479536057 | 0.633417018 |
| LOC100507218 | 3.144134278  | 0.00227763  | 0.016383464  | 0.986985093  | 0.60832298   | 0.545422501 |
| LOC100507246 | -0.980224271 | 0.329687548 | 1.242246408  | 0.219179946  | 1.846260543  | 0.070119542 |
| LOC100507250 | -0.065769768 | 0.947711698 | -1.42232534  | 0.160325083  | 0.139216931  | 0.889776097 |
| LOC100507254 | 1.239388568  | 0.218527409 | -0.21589039  | 0.829835935  | 1.107317896  | 0.272870392 |
| LOC100507266 | -0.254263036 | 0.799891052 | 0.590788119  | 0.556973671  | 1.187101908  | 0.240177745 |
| LOC100507321 | 3.030349134  | 0.003214741 | -3.057516155 | 0.003381889  | -3.32312182  | 0.001569796 |
| LOC100507331 | 0.979554443  | 0.330016337 | 0.00171519   | 0.998637404  | 1.723853741  | 0.09022819  |
| LOC100507387 | 0.711662874  | 0.478573378 | -0.686924959 | 0.494886583  | -0.493239338 | 0.602764147 |
| LOC100507392 | -2.790071222 | 0.006471663 | -2.199198347 | 0.031892981  | -3.127212905 | 0.022793442 |
| LOC100507421 | -0.261457317 | 0.794356496 | 1.918718004  | 0.059980489  | 1.688464956  | 0.096860479 |
| LOC100507423 | -0.494215541 | 0.622396845 | -0.037361731 | 0.97032578   | -0.050723741 | 0.959725395 |
| LOC100507424 | 0.495980437  | 0.621156189 | -0.085753403 | 0.931959854  | 0.646243951  | 0.520750016 |
| LOC100507433 | 1.564649384  | 0.121287617 | -2.244879199 | 0.028631649  | -0.315889457 | 0.753255828 |
| LOC100507463 | -1.917211779 | 0.058485625 | -3.089007816 | 0.00308932   | -2.502196865 | 0.01527673  |
| LOC100507495 | -0.106968714 | 0.91505955  | -1.417906769 | 0.16160573   | -1.932067687 | 0.058394694 |
| LOC100507501 | 0.572675014  | 0.568338635 | 1.088704012  | 0.280818929  | 1.515970283  | 0.13512809  |
| LOC100507557 | 0.814148804  | 0.417777751 | -1.039541633 | 0.302897209  | -2.000602582 | 0.050271628 |

|              |              |             |              |             |              |             |
|--------------|--------------|-------------|--------------|-------------|--------------|-------------|
| LOC100507567 | 0.135882681  | 0.892227268 | 0.360218803  | 0.720001133 | -1.111328733 | 0.271155626 |
| LOC100507577 | 2.588916552  | 0.011280032 | -0.062434275 | 0.950433163 | 0.4475746    | 0.656179572 |
| LOC100507589 | 1.456135341  | 0.14894684  | -2.144278179 | 0.03624301  | -2.317574848 | 0.02413587  |
| LOC100507632 | -1.809085707 | 0.073884267 | -0.293332703 | 0.770322189 | -0.305750711 | 0.76092342  |
| LOC100507634 | -1.138898945 | 0.257864831 | -3.139736878 | 0.002667334 | -2.193130148 | 0.032449531 |
| LOC100526820 | 1.178578192  | 0.241772678 | -1.938402091 | 0.057480368 | -1.153272933 | 0.253676603 |
| LOC100527964 | 1.424947496  | 0.157742233 | 0.683904834  | 0.496777687 | 2.502171248  | 0.015277722 |
| LOC100616668 | 1.694640325  | 0.09371277  | -1.928265749 | 0.058756479 | -0.242193295 | 0.809511455 |
| LOC100630917 | 1.477001291  | 0.143278278 | 3.912123313  | 0.00024406  | 4.440690719  | 4.25E-05    |
| LOC100630918 | -0.527064343 | 0.59948742  | -0.129293219 | 0.897576091 | -0.450031261 | 0.654417929 |
| LOC100630923 | 0.626038541  | 0.532925157 | 0.194126132  | 0.846760177 | 1.516924155  | 0.134887443 |
| LOC113230    | -2.95287834  | 0.004045242 | -0.966402531 | 0.337883226 | -1.315819725 | 0.193573425 |
| LOC115110    | 0.677358329  | 0.499972033 | -0.126355396 | 0.899890668 | 0.311221152  | 0.756783259 |
| LOC121952    | -2.170825356 | 0.032661929 | -1.341190858 | 0.185123484 | -0.978062152 | 0.332232398 |
| LOC143188    | -2.159391818 | 0.033565605 | 0.467497553  | 0.641907923 | 1.123324377  | 0.266072386 |
| LOC143666    | 0.340440499  | 0.734343715 | -1.870662949 | 0.066475339 | -1.826168585 | 0.073135055 |
| LOC144438    | 0.15885581   | 0.874149862 | 1.173072146  | 0.245595456 | 2.318166634  | 0.024101344 |
| LOC144571    | 0.28396866   | 0.777107665 | -1.32877869  | 0.189161406 | -1.650974425 | 0.104318064 |
| LOC145783    | 1.933546077  | 0.056413452 | -0.243169947 | 0.808737708 | -0.046201397 | 0.963313405 |
| LOC146880    | 0.228513119  | 0.819782465 | -3.033360434 | 0.003623634 | -2.510238616 | 0.014968143 |
| LOC147646    | 3.429188127  | 0.000926632 | -2.188574773 | 0.032696739 | -0.495053676 | 0.622491    |
| LOC147727    | 2.213542412  | 0.029470619 | 0.591145652  | 0.55673574  | 0.570889938  | 0.570348601 |
| LOC147804    | 1.996283246  | 0.049023251 | 0.48877932   | 0.626853951 | 0.832636388  | 0.408571969 |
| LOC148189    | -0.957683449 | 0.340870459 | -0.759078925 | 0.450900788 | -0.088974364 | 0.929418391 |
| LOC148413    | 0.652455016  | 0.515824217 | -1.232231465 | 0.222869287 | -0.752439701 | 0.454924756 |
| LOC148696    | -0.19915799  | 0.84260287  | -0.805864682 | 0.423635579 | 0.044761256  | 0.964456171 |
| LOC149837    | -1.617170888 | 0.109453895 | 0.384791212  | 0.70180933  | -1.14027674  | 0.259004139 |
| LOC150197    | 0.23861178   | 0.811966564 | -1.803592701 | 0.076525945 | -2.667191894 | 0.009971738 |
| LOC150381    | -1.956828879 | 0.053567495 | -1.207842366 | 0.232044168 | -1.400968794 | 0.166717606 |
| LOC150776    | 3.673753867  | 0.000411853 | 0.000411853  | 0.957565645 | 0.373481695  | 0.710194223 |
| LOC151162    | -0.930455081 | 0.354704632 | 2.187975558  | 0.0327426   | 2.229198805  | 0.029812763 |
| LOC151174    | 0.46386111   | 0.643903275 | -1.112130362 | 0.270702607 | 0.577034663  | 0.566218921 |
| LOC151534    | 0.456992214  | 0.648813213 | -2.927754857 | 0.004882059 | -2.192377175 | 0.032506697 |
| LOC152217    | 1.403920692  | 0.163894414 | -1.791165899 | 0.078521335 | -1.813469428 | 0.075096646 |
| LOC153684    | 1.590544466  | 0.115331689 | -1.13296461  | 0.261923386 | -2.535007868 | 0.014052777 |
| LOC154761    | 0.403948258  | 0.687239857 | -0.863072143 | 0.391677493 | 0.001443914  | 0.998853033 |
| LOC154822    | -0.258778354 | 0.796416206 | 1.19838605   | 0.235674578 | 0.984086684  | 0.329287906 |
| LOC155060    | 3.260161064  | 0.001589145 | 0.184699871  | 0.854113262 | 2.136748055  | 0.036982601 |
| LOC158572    | -0.473267915 | 0.637204826 | -0.44322886  | 0.659260613 | 0.107978769  | 0.914396863 |
| LOC162632    | 2.276411097  | 0.025270588 | 0.126647031  | 0.899660862 | -0.741342978 | 0.461570168 |
| LOC200772    | 1.00938772   | 0.315581799 | -0.493148696 | 0.623782566 | -0.185643071 | 0.853392644 |
| LOC202181    | 2.631919183  | 0.010040387 | -1.146120667 | 0.256484699 | -0.824822278 | 0.412957489 |
| LOC202781    | 2.990540334  | 0.003619449 | -2.281017019 | 0.026264108 | -0.812602556 | 0.419872711 |
| LOC219347    | 2.970054755  | 0.003845617 | -1.47226258  | 0.146393557 | 0.218022575  | 0.828200717 |
| LOC220594    | 0.929555073  | 0.355167983 | -0.476531222 | 0.635498879 | -0.629844594 | 0.531347065 |
| LOC220729    | 2.443283982  | 0.016570406 | -2.654649988 | 0.010247454 | -2.23011706  | 0.029748553 |
| LOC220906    | 0.699918497  | 0.485841538 | 1.432464424  | 0.157416211 | 1.315006618  | 0.193844762 |
| LOC221442    | 2.072621365  | 0.041160241 | 2.677744549  | 0.009640987 | 2.723433131  | 0.00859022  |
| LOC221710    | 1.00952214   | 0.91982018  | -1.068706644 | 0.289660532 | -2.957880725 | 0.004523704 |
| LOC253039    | 1.725944313  | 0.087899676 | -0.245311976 | 0.807086854 | -1.379122635 | 0.173317342 |
| LOC254099    | 0.016133221  | 0.987164971 | 0.98706703   | 0.327738304 | 1.503111327  | 0.138405567 |
| LOC254100    | 1.535196198  | 0.128356645 | -2.554251208 | 0.013309626 | -2.477593456 | 0.016256872 |
| LOC254128    | 1.188146257  | 0.238002216 | -1.325953002 | 0.190089902 | -0.28026528  | 0.780302391 |
| LOC254559    | 1.452767734  | 0.149877809 | -0.62040264  | 0.537439891 | -0.201067487 | 0.84137127  |
| LOC255512    | -0.370950623 | 0.711574098 | -1.589702241 | 0.117376548 | -2.073200366 | 0.042746719 |
| LOC256880    | 0.892676195  | 0.374487802 | -2.353222983 | 0.022047629 | -1.995879846 | 0.050798428 |
| LOC257358    | -0.678922941 | 0.498984934 | 0.580953339  | 0.563538373 | 1.365621742  | 0.177495114 |
| LOC257396    | 0.627133997  | 0.532210247 | -0.463030291 | 0.645087459 | -1.335933561 | 0.186952215 |
| LOC282997    | -1.643911445 | 0.10379581  | -2.416388503 | 0.018866087 | -1.56450586  | 0.123309129 |
| LOC283050    | 0.787577907  | 0.433079481 | 0.931274576  | 0.355598757 | 1.234851087  | 0.222020553 |
| LOC283070    | -1.088568171 | 0.279344177 | 0.102400392  | 0.918794556 | 0.058887647  | 0.953250354 |
| LOC283089    | -2.553461473 | 0.012404314 | 1.219824124  | 0.227502944 | 0.872904844  | 0.386426938 |
| LOC283104    | 1.302291743  | 0.196246362 | -0.162000376 | 0.871872536 | 0.452118328  | 0.652922868 |
| LOC283174    | 1.139424445  | 0.257646886 | 1.977032712  | 0.052831596 | 2.477040745  | 0.016279528 |
| LOC283177    | 1.475171195  | 0.143768618 | -2.204360842 | 0.03150871  | -0.245511411 | 0.806954249 |
| LOC283624    | 0.777735007  | 0.438830546 | -1.882346873 | 0.064843819 | -1.506470905 | 0.137543271 |
| LOC283663    | 1.7078862    | 0.091215832 | -0.565283834 | 0.574076173 | 0.427529137  | 0.67062662  |
| LOC283693    | 1.155553394  | 0.251020744 | 0.686402788  | 0.495213267 | 1.755839439  | 0.084560862 |
| LOC283875    | -1.39631341  | 0.16616497  | 1.325420948  | 0.190265115 | 1.890671377  | 0.063824368 |
| LOC283888    | 2.035790987  | 0.044806825 | 0.425504904  | 0.672054361 | 0.240326414  | 0.810951144 |
| LOC283922    | 1.687782106  | 0.095027344 | -0.617221174 | 0.539521346 | 0.981912338  | 0.33034861  |
| LOC284009    | 0.394660216  | 0.69405743  | -0.689529078 | 0.493259144 | 0.639798947  | 0.524901322 |

|           |              |             |              |             |              |             |
|-----------|--------------|-------------|--------------|-------------|--------------|-------------|
| LOC284023 | -0.186583803 | 0.852420425 | -2.593783295 | 0.012016386 | -1.881833726 | 0.065037437 |
| LOC284233 | 0.609254819  | 0.543939884 | 0.396199274  | 0.693422023 | 0.691079871  | 0.492358281 |
| LOC284385 | -0.391368407 | 0.696479764 | 0.503903106  | 0.616251541 | 0.931086097  | 0.355788987 |
| LOC284408 | 0.866034195  | 0.388848296 | -0.450960408 | 0.653711327 | 0.13005521   | 0.896986832 |
| LOC284440 | 2.010938162  | 0.047421262 | 2.911352342  | 0.005110564 | 3.891253327  | 0.000266528 |
| LOC284454 | 0.720938914  | 0.472875755 | -1.627498133 | 0.109090179 | -0.681306926 | 0.498473372 |
| LOC284551 | 3.481637735  | 0.000781049 | -2.327440008 | 0.023478381 | -0.385689826 | 0.701181563 |
| LOC284749 | 0.990980037  | 0.324437572 | 0.876302814  | 0.384505635 | 1.084606408  | 0.282723922 |
| LOC284751 | -1.536084985 | 0.128138661 | -1.082650326 | 0.283475428 | -0.632596262 | 0.529561164 |
| LOC284837 | 1.006899915  | 0.316769132 | -1.019268897 | 0.312337709 | -0.574165379 | 0.568145444 |
| LOC284889 | 2.125622473  | 0.036362781 | 0.08536334   | 0.93226858  | -0.937123312 | 0.35270235  |
| LOC285033 | -0.08123571  | 0.935440689 | 0.889061837  | 0.377668049 | 1.100656417  | 0.275735199 |
| LOC285074 | -1.532817188 | 0.128941565 | -1.364896946 | 0.177593766 | -2.479642367 | 0.016173133 |
| LOC285359 | 1.335696046  | 0.185124919 | 2.27136654   | 0.026878738 | 3.6283504    | 0.000616322 |
| LOC285540 | 0.801400268  | 0.425078614 | -0.5165592   | 0.60744167  | -1.003037481 | 0.320139238 |
| LOC285696 | 0.123785161  | 0.901770302 | -1.851122308 | 0.069281459 | -1.67313312  | 0.099855638 |
| LOC285740 | -0.550660618 | 0.583274536 | 0.360568694  | 0.719740921 | 0.830514771  | 0.409759861 |
| LOC285819 | -1.200544327 | 0.233179621 | -1.789579177 | 0.078779218 | -1.129192303 | 0.263610493 |
| LOC285965 | 0.410601947  | 0.68237176  | -0.839186338 | 0.404834385 | -0.114792195 | 0.909018717 |
| LOC285972 | 0.527696173  | 0.599050598 | -0.223385309 | 0.82402604  | -0.012354574 | 0.990186452 |
| LOC286059 | -0.121048076 | 0.903931487 | -2.769901846 | 0.007533992 | -2.135082785 | 0.037124519 |
| LOC286367 | 0.786606973  | 0.433644804 | -0.382262697 | 0.703673419 | 0.227038542  | 0.821217091 |
| LOC286437 | 1.127210715  | 0.262746027 | -1.968462908 | 0.053834083 | -1.501501353 | 0.138820309 |
| LOC286442 | 1.393560506  | 0.166992538 | 1.420819116  | 0.160760749 | 1.197120828  | 0.236281446 |
| LOC286467 | -0.527991212 | 0.59884667  | 1.508949913  | 0.136778    | -0.194599729 | 0.846407618 |
| LOC338651 | 0.355166466  | 0.723322624 | -4.416132539 | 4.48E-05    | -3.839543353 | 0.000315015 |
| LOC338758 | 0.212973848  | 0.831844534 | -3.349616224 | 0.001432257 | -3.185941682 | 0.002355025 |
| LOC338799 | 1.229743158  | 0.222101348 | -0.088689371 | 0.929636445 | 1.34723205   | 0.18330901  |
| LOC338817 | 2.607181113  | 0.010737534 | 0.663949934  | 0.509371537 | 0.179358401  | 0.858300959 |
| LOC339290 | 2.584306027  | 0.011420831 | -0.16863254  | 0.866676485 | -1.274915495 | 0.207581448 |
| LOC339666 | 0.916078309  | 0.362152656 | 0.594080831  | 0.554784364 | 0.719147846  | 0.475027652 |
| LOC339803 | -0.006679928 | 0.994685488 | 0.869449584  | 0.388210173 | 0.816046818  | 0.41791654  |
| LOC339874 | 1.24211678   | 0.217524184 | -1.773105322 | 0.081498856 | -1.196442677 | 0.236543718 |
| LOC339894 | 0.975369906  | 0.332075234 | -0.079567332 | 0.93685719  | 0.882332489  | 0.381353018 |
| LOC340037 | 0.309804034  | 0.757449225 | -0.334910579 | 0.73890921  | 0.112337181  | 0.910956091 |
| LOC340544 | 1.078658488  | 0.283715104 | -1.071285917 | 0.288509448 | 0.160556858  | 0.873017793 |
| LOC344595 | 1.133063711  | 0.260293666 | -0.245029167 | 0.807304764 | -0.870556407 | 0.387697411 |
| LOC348761 | -0.175561237 | 0.861045749 | -1.276154907 | 0.207022908 | -1.590879902 | 0.117242942 |
| LOC374443 | 0.388233173  | 0.698789811 | -1.53493719  | 0.130274605 | -1.712911832 | 0.092237561 |
| LOC375190 | 1.923055528  | 0.057737014 | 0.5762425    | 0.566696353 | -2.159222985 | 0.035113154 |
| LOC386597 | -0.029133957 | 0.976824338 | 0.296542723  | 0.767882357 | -1.065182341 | 0.291345485 |
| LOC386758 | -0.78495653  | 0.434606765 | -1.209070965 | 0.231575498 | 0.6051471    | 0.547515549 |
| LOC387646 | 0.888135615  | 0.376911393 | 1.915092577  | 0.060450915 | 0.744806143  | 0.459490252 |
| LOC387647 | 2.21148516   | 0.029617819 | 0.559331524  | 0.578104079 | -1.83941939  | 0.854720658 |
| LOC387723 | 0.965674922  | 0.33687778  | -1.228509599 | 0.224251924 | -1.246970535 | 0.127576822 |
| LOC387895 | 0.699111387  | 0.48634325  | -2.202158499 | 0.031672141 | -0.964885713 | 0.338733081 |
| LOC388152 | 0.621355854  | 0.535986705 | 0.951714457  | 0.345218679 | 1.436297132  | 0.156457646 |
| LOC388387 | -0.5819785   | 0.562082986 | -1.085922123 | 0.282037526 | -0.247359432 | 0.805530931 |
| LOC388564 | -1.621834743 | 0.108449576 | -2.157872384 | 0.035120492 | -2.768817778 | 0.007605951 |
| LOC388588 | -1.812797526 | 0.073304579 | -0.561143462 | 0.576876504 | -1.379730044 | 0.173131172 |
| LOC388692 | 1.22762631   | 0.222891377 | -0.459041943 | 0.647931772 | -0.264143008 | 0.792635327 |
| LOC388789 | -0.652967376 | 0.515495422 | -0.404850296 | 0.68708725  | -0.039071825 | 0.968971501 |
| LOC388796 | 1.550042262  | 0.124753757 | 0.907541287  | 0.367902153 | 1.915227604  | 0.060554049 |
| LOC389333 | 1.156832786  | 0.250500367 | -2.129670774 | 0.037484047 | -2.552794382 | 0.013427081 |
| LOC389634 | -0.519241338 | 0.604908045 | -0.427991218 | 0.670253657 | 0.448874927  | 0.655246877 |
| LOC389641 | 0.284882203  | 0.776409973 | -1.541784258 | 0.128602732 | -0.941820263 | 0.350313017 |
| LOC389765 | -0.007995157 | 0.993639121 | 0.335256034  | 0.738649991 | 0.840044356  | 0.404440789 |
| LOC389791 | 1.001245651  | 0.319478768 | -1.040921992 | 0.302261564 | -1.176359773 | 0.24440672  |
| LOC389906 | 0.49087314   | 0.624749419 | 1.419811391  | 0.161052739 | 2.901427835  | 0.005294043 |
| LOC390595 | 2.082676742  | 0.040210232 | 0.467107894  | 0.642184992 | 0.306454116  | 0.760390669 |
| LOC391322 | -0.815200798 | 0.417178667 | -1.805688006 | 0.076193714 | -1.77677665  | 0.081013716 |
| LOC399715 | 0.480680731  | 0.631947392 | -0.093621716 | 0.925734576 | 0.463065614  | 0.645104374 |
| LOC399744 | 0.943872989  | 0.347842773 | 0.656220906  | 0.514295164 | 1.007200549  | 0.318152558 |
| LOC399753 | 2.132235149  | 0.035799645 | -1.188993631 | 0.239321108 | 0.084917757  | 0.932628366 |
| LOC399815 | 1.640660376  | 0.104470825 | -0.495864865 | 0.621876649 | -1.223259448 | 0.226332867 |
| LOC400027 | 0.736495153  | 0.463406468 | -1.882649487 | 0.064802017 | -1.753226613 | 0.085012447 |
| LOC400236 | 0.380238928  | 0.7046928   | -0.558151359 | 0.578904311 | -0.498186362 | 0.620295478 |
| LOC400604 | 0.507969414  | 0.612757514 | -0.925213418 | 0.358715277 | -1.397967606 | 0.167612603 |
| LOC400657 | -0.129629512 | 0.89715814  | -1.094634033 | 0.278233565 | -1.33078153  | 0.18863161  |
| LOC400680 | -0.87886464  | 0.381890364 | -0.686192059 | 0.495345138 | -0.246144365 | 0.806466683 |
| LOC400685 | -0.21008824  | 0.834088967 | 0.910663471  | 0.366268235 | -0.049168357 | 0.96095934  |
| LOC400752 | -0.1167406   | 0.907334102 | -1.066524121 | 0.290637029 | -0.650349858 | 0.518114435 |



|           |              |             |              |             |               |             |
|-----------|--------------|-------------|--------------|-------------|---------------|-------------|
| LOC400927 | -1.479404813 | 0.142636284 | -6.012621457 | 1.33E-07    | -4.884779914  | 8.97E-06    |
| LOC400960 | -1.903653346 | 0.060254158 | -1.929318454 | 0.058622836 | -2.019588185  | 0.048201049 |
| LOC401052 | -0.631283084 | 0.529506982 | -0.166500084 | 0.868346551 | 2.053363044   | 0.044699089 |
| LOC401093 | -0.892152751 | 0.374766696 | -0.536687781 | 0.593550382 | -2.869164289  | 0.005787249 |
| LOC401127 | -0.463414352 | 0.644222144 | -0.6323426   | 0.529665346 | 0.878055722   | 0.383649532 |
| LOC401233 | -0.385453677 | 0.700840126 | -1.377745105 | 0.173611807 | -0.919132985  | 0.361951669 |
| LOC401320 | 1.278687663  | 0.204400189 | -0.482249414 | 0.631456433 | 1.731728516   | 0.088804561 |
| LOC401321 | 1.497370604  | 0.137908434 | -1.09317715  | 0.278867189 | 1.150566179   | 0.254779676 |
| LOC401397 | 0.611333347  | 0.542569492 | -1.27765071  | 0.206498424 | -0.223497681  | 0.823958085 |
| LOC401431 | 0.155036036  | 0.877151256 | -0.020834272 | 0.983449868 | 1.028534504   | 0.308102043 |
| LOC401588 | 0.32504664   | 0.745924447 | -3.252021787 | 0.001917834 | -1.98164546   | 0.052415019 |
| LOC439949 | 2.13035607   | 0.035958893 | 0.393126202  | 0.695677635 | 1.473224276   | 0.146266045 |
| LOC439994 | 0.015027613  | 0.988044485 | -2.732768173 | 0.008326078 | -2.986025317  | 0.004179863 |
| LOC440104 | 2.508131201  | 0.013988374 | -0.01082141  | 0.991403329 | 0.945654005   | 0.34837063  |
| LOC440288 | 1.209772294  | 0.229636172 | 1.803574747  | 0.076528797 | 1.897448259   | 0.06290721  |
| LOC440354 | -0.641613822 | 0.522807162 | 1.21468967   | 0.22944094  | -0.345065464  | 0.731332454 |
| LOC440434 | -0.152050273 | 0.879498577 | 0.692193355  | 0.491597157 | 0.05522753    | 0.956152939 |
| LOC440461 | 1.051280931  | 0.296034615 | -0.716347092 | 0.476671648 | -0.777919108  | 0.439877309 |
| LOC440600 | 0.33769022   | 0.736408322 | -1.158752862 | 0.251338768 | -0.366328582  | 0.715494517 |
| LOC440944 | 1.879420382  | 0.063527409 | -0.79765806  | 0.428345302 | 0.111842531   | 0.91134651  |
| LOC441208 | 0.040471858  | 0.967809475 | -0.676239163 | 0.501595378 | -0.244142886  | 0.808008689 |
| LOC441242 | 1.782618637  | 0.078129133 | -3.057782476 | 0.00337931  | -2.778418232  | 0.007411519 |
| LOC441454 | 0.504549036  | 0.615148399 | 0.626602688  | 0.53339548  | 0.865791419   | 0.390283228 |
| LOC493754 | -0.433270395 | 0.665888365 | 0.337166516  | 0.737216978 | 0.728625886   | 0.469253976 |
| LOC541471 | -1.550767865 | 0.124579743 | 1.575939794  | 0.120516955 | 0.845301238   | 0.401524822 |
| LOC550112 | 1.570277445  | 0.119972753 | -1.375865839 | 0.174189927 | -0.981729339  | 0.330437985 |
| LOC550643 | -0.107656344 | 0.914515649 | 1.120046608  | 0.267342742 | 1.674192733   | 0.099646225 |
| LOC553103 | -0.989987413 | 0.324919748 | -0.240725804 | 0.810622467 | 0.046456726   | 0.963110807 |
| LOC554206 | 1.065246671  | 0.289705421 | -0.86646306  | 0.389831507 | -0.403280781  | 0.688270897 |
| LOC595101 | 0.565452063  | 0.573218577 | -4.230477104 | 8.46E-05    | -3.990223087  | 0.00019299  |
| LOC606724 | -0.367326851 | 0.714265325 | -1.090102528 | 0.280207702 | -0.236505686  | 0.81389963  |
| LOC613037 | -1.081367189 | 0.282515708 | -0.689521948 | 0.493263595 | -0.116124787  | 0.907967334 |
| LOC619207 | 1.97479124   | 0.05145607  | -3.150271407 | 0.002586767 | -1.696847546  | 0.095254337 |
| LOC641298 | 1.575045409  | 0.118867738 | 0.16148793   | 0.872274258 | -1.686070511  | 0.097323328 |
| LOC641367 | 0.82933272   | 0.409180956 | -0.098982286 | 0.921496031 | -0.9851202982 | 0.345571682 |
| LOC641467 | 1.041320739  | 0.300605626 | -0.763527515 | 0.448265201 | -0.851171579  | 0.39828393  |
| LOC641518 | 4.42058819   | 2.82E-05    | 0.46478732   | 0.643836109 | 0.9718861     | 0.335269023 |
| LOC642361 | 0.593125116  | 0.554632863 | -2.848087005 | 0.006087984 | -3.263521661  | 0.001874468 |
| LOC642846 | 0.159292179  | 0.873807101 | 0.374154778  | 0.709663079 | 0.988589671   | 0.327098442 |
| LOC642852 | 2.56042034   | 0.012174635 | -0.28558546  | 0.77622019  | -0.901620379  | 0.371103909 |
| LOC643529 | 2.010226868  | 0.04749797  | -1.646399193 | 0.105127955 | -0.752971469  | 0.454607695 |
| LOC643669 | 1.362962621  | 0.176403994 | 1.325890089  | 0.190110613 | 2.044265503   | 0.045619995 |
| LOC643723 | -2.320407015 | 0.022653848 | -0.031523193 | 0.974961279 | 0.90063522    | 0.371623108 |
| LOC643733 | 0.759052591  | 0.449868332 | -1.0468465   | 0.299543724 | 0.231765062   | 0.817561771 |
| LOC643770 | -0.808683271 | 0.420898522 | -1.602449251 | 0.11452697  | -0.348106041  | 0.729060258 |
| LOC643802 | -0.309817652 | 0.757438904 | -0.946501808 | 0.347846828 | -1.383595698  | 0.171949949 |
| LOC643837 | 0.60335547   | 0.547838658 | 1.928129173  | 0.058773837 | 2.845001557   | 0.006184111 |
| LOC643988 | -0.019057312 | 0.984838929 | 1.468618057  | 0.147377063 | 0.750142834   | 0.456295705 |
| LOC644172 | -0.62891786  | 0.531047132 | 1.718319165  | 0.091110171 | 0.467524322   | 0.641931433 |
| LOC644242 | -0.549585496 | 0.584008707 | 0.295883144  | 0.76838349  | 0.368598242   | 0.71381121  |
| LOC644246 | -1.711280774 | 0.090584765 | 0.571846076  | 0.569651396 | -0.319181554  | 0.750771449 |
| LOC644656 | 0.393709067  | 0.694757024 | -1.130764832 | 0.262840692 | 0.176312954   | 0.860681484 |
| LOC644714 | -1.387269499 | 0.16889554  | 0.886408363  | 0.379083683 | -0.750240162  | 0.456237564 |
| LOC644961 | 0.086018928  | 0.9316486   | -1.128892876 | 0.263623088 | -1.325013461  | 0.190525342 |
| LOC645158 | 1.755740966  | 0.082644573 | -0.54733033  | 0.586266473 | -0.027474478  | 0.978178562 |
| LOC645212 | 1.955842323  | 0.053685564 | -0.94993744  | 0.346113164 | -0.979559155  | 0.331499111 |
| LOC645431 | 0.477708517  | 0.634053139 | -0.262366075 | 0.793975359 | -1.662009887  | 0.10207576  |
| LOC645513 | 0.28680536   | 0.774941818 | -2.781188737 | 0.007307341 | -2.410424376  | 0.01922796  |
| LOC645638 | -0.396506037 | 0.692700539 | 1.828053232  | 0.072722128 | 0.835087832   | 0.407202031 |
| LOC645676 | 1.842520781  | 0.068797782 | -1.219900371 | 0.227474255 | -4.365533097  | 5.49E-05    |
| LOC646214 | 2.03621002   | 0.044763826 | -0.043155092 | 0.965727165 | -1.918062166  | 0.060185894 |
| LOC646278 | 0.351009064  | 0.726428282 | 1.838540338  | 0.071140614 | 2.135567216   | 0.037083186 |
| LOC646329 | -0.4277789   | 0.669866852 | -2.190204973 | 0.032572257 | -1.16263297   | 0.249888472 |
| LOC646471 | 2.314745822  | 0.022976553 | -1.36209483  | 0.17847141  | -1.197694427  | 0.236059774 |
| LOC646762 | 0.103924374  | 0.917468046 | 0.521395973  | 0.604090104 | 0.825006547   | 0.412853743 |
| LOC647979 | -0.034438711 | 0.972606036 | -0.222376724 | 0.824807305 | -1.298375321  | 0.199457767 |
| LOC648740 | 1.076554226  | 0.284649277 | 0.001705896  | 0.998644787 | 0.026813817   | 0.978703159 |
| LOC648987 | 0.691666999  | 0.490984205 | 1.8034583    | 0.076547297 | -0.024039417  | 0.980906266 |
| LOC650623 | 1.387761242  | 0.168746196 | 0.898701344  | 0.372553533 | 0.396228735   | 0.693435726 |
| LOC650794 | 1.551377703  | 0.12443364  | 0.605994344  | 0.546899382 | -0.685235834  | 0.496010016 |
| LOC652276 | 1.316763585  | 0.191368507 | -3.333030436 | 0.001505615 | -1.34029094   | 0.185540722 |
| LOC653160 | 1.294636954  | 0.198863655 | -3.642745304 | 0.000579691 | -2.529613336  | 0.014247702 |

|           |              |             |              |             |              |             |
|-----------|--------------|-------------|--------------|-------------|--------------|-------------|
| LOC653566 | -0.757592767 | 0.450737506 | 0.139403597  | 0.889617544 | 0.750699427  | 0.455963268 |
| LOC653712 | 1.577893778  | 0.118211487 | -0.098632777 | 0.921772315 | 0.903058658  | 0.370346739 |
| LOC654433 | 0.022582541  | 0.982034873 | -1.160862232 | 0.250486734 | 1.002999679  | 0.320157315 |
| LOC678655 | -0.857996151 | 0.393247055 | -1.449144454 | 0.152720272 | -1.327769808 | 0.189618611 |
| LOC727896 | 0.667919783  | 0.505949021 | -0.324050911 | 0.747073343 | -0.429852528 | 0.668945565 |
| LOC728024 | -0.538104166 | 0.59187615  | -0.895238739 | 0.374385627 | -1.984456949 | 0.052092264 |
| LOC728084 | -3.531448378 | 0.000663012 | 0.707259128  | 0.482257374 | -1.070300492 | 0.289056319 |
| LOC728175 | -1.427543834 | 0.156995085 | 0.134446383  | 0.893518321 | -1.93041167  | 0.058604088 |
| LOC728190 | -1.356312681 | 0.17850164  | -2.490837063 | 0.015649526 | -3.692875062 | 0.000503068 |
| LOC728323 | 0.543509289  | 0.588166187 | -1.2588416   | 0.213165944 | -1.28836017  | 0.202896172 |
| LOC728377 | 1.531728899  | 0.129209841 | -0.081183845 | 0.935577198 | 0.024889052  | 0.980231567 |
| LOC728392 | -0.190563889 | 0.849310297 | 0.073215602  | 0.941888224 | -0.116815973 | 0.907422071 |
| LOC728431 | -0.489117272 | 0.625986861 | -0.357612138 | 0.721940739 | -0.514496115 | 0.60892131  |
| LOC728537 | 1.310692631  | 0.19340361  | -1.715875777 | 0.091559758 | -1.080813812 | 0.284393205 |
| LOC728554 | 0.345922539  | 0.730234239 | -1.743391778 | 0.086601205 | -2.697561534 | 0.009202338 |
| LOC728558 | 0.590136614  | 0.556625477 | -0.286478245 | 0.775539827 | 0.863148037  | 0.391722344 |
| LOC728613 | -0.214700641 | 0.830502095 | -0.6143202   | 0.541422894 | -1.123895094 | 0.26583223  |
| LOC728730 | 0.809776992  | 0.420272905 | 2.353155617  | 0.022051264 | 2.334009729  | 0.023193225 |
| LOC728743 | 1.977048712  | 0.051195791 | 1.323620061  | 0.190859078 | 2.081836087  | 0.041920197 |
| LOC728752 | 0.120438604  | 0.904412821 | 2.881857736  | 0.005546581 | 2.451260792  | 0.017368442 |
| LOC728855 | -3.057781172 | 0.002960724 | -0.441935749 | 0.660190631 | -1.527973636 | 0.132124545 |
| LOC728989 | 3.014719073  | 0.003368363 | 0.001833014  | 0.998543801 | 1.183448265  | 0.241610134 |
| LOC729013 | 0.035891926  | 0.971450581 | -2.569142205 | 0.012808347 | -1.736018218 | 0.088036906 |
| LOC729082 | 0.376600366  | 0.707385561 | -1.385456867 | 0.171254832 | -1.13237966  | 0.262280018 |
| LOC729178 | 0.716369185  | 0.475677863 | 0.217095073  | 0.828901439 | -0.232626861 | 0.816895723 |
| LOC729234 | 1.650446747  | 0.102449562 | 1.296340714  | 0.200028289 | 2.373984724  | 0.021036063 |
| LOC729513 | 2.534169631  | 0.013057588 | 0.947607958  | 0.347288033 | 1.921736029  | 0.059711566 |
| LOC729603 | 0.030524722  | 0.975718343 | -1.057415798 | 0.29473676  | -0.340399004 | 0.734824363 |
| LOC729678 | -2.042500017 | 0.044122619 | 0.088144148  | 0.930067866 | 0.316247683  | 0.752985366 |
| LOC729723 | -0.137429361 | 0.891008295 | -0.694088601 | 0.490416776 | 0.310097628  | 0.757632989 |
| LOC729737 | -0.486126895 | 0.628096787 | -1.249797782 | 0.216428043 | -0.392037162 | 0.696512545 |
| LOC729799 | 1.381969361  | 0.170511617 | -1.22537751  | 0.225420331 | -0.330065909 | 0.742576579 |
| LOC729852 | -0.954512937 | 0.34246301  | -0.258421057 | 0.797003202 | -1.422609452 | 0.16037289  |
| LOC730091 | 2.006905464  | 0.047857564 | -0.66636835  | 0.507836151 | -1.16555302  | 0.248715035 |
| LOC730101 | 1.320596533  | 0.190091907 | 0.126393953  | 0.899860285 | -0.866202443 | 0.390059754 |
| LOC730102 | -0.266250299 | 0.790675075 | 0.568344623  | 0.572010271 | 1.357959875  | 0.179900048 |
| LOC730227 | -1.736486753 | 0.086009844 | -1.769415099 | 0.082118423 | -0.741083436 | 0.461726261 |
| LOC731275 | 0.212594211  | 0.832139737 | -0.271870867 | 0.786693488 | -0.674052968 | 0.503038974 |
| LOC731424 | -1.752682267 | 0.083171807 | -0.117945551 | 0.906521163 | -1.543358073 | 0.128352897 |
| LOC731789 | 1.057096512  | 0.293387675 | -1.023625311 | 0.310292432 | 0.354848496  | 0.724030417 |
| LOC79015  | 0.198074447  | 0.843447912 | -0.702508177 | 0.485191921 | 1.203164959  | 0.233953226 |
| LOC80054  | 1.483085911  | 0.141657399 | -0.930594228 | 0.355947702 | 0.573785371  | 0.568400834 |
| LOC81691  | 0.459570678  | 0.646968272 | 2.000612708  | 0.050155484 | 0.906988594  | 0.368282881 |
| LOC90784  | 1.042074543  | 0.30025802  | 2.084543069  | 0.041555331 | 2.736655336  | 0.008292027 |
| LOC90834  | 3.735453686  | 0.000333819 | 0.094794988  | 0.924806694 | -0.278695313 | 0.081500921 |
| LOC91450  | 0.767246658  | 0.445007589 | -0.178660123 | 0.858831539 | -0.382088218 | 0.703836035 |
| LOC92249  | -0.820836482 | 0.413978072 | -3.435593237 | 0.00110314  | -2.655988602 | 0.010270117 |
| LOC93432  | -0.800888545 | 0.425373243 | 1.74589561   | 0.086161257 | -1.459476734 | 0.149997594 |
| LOC93622  | 0.075589664  | 0.939918733 | -0.567531323 | 0.57255886  | -0.842999782 | 0.402799831 |
| LOC96610  | 0.644360032  | 0.521033636 | 1.004574075  | 0.319303828 | 1.185607768  | 0.24076277  |
| LOH12CR1  | 2.061184276  | 0.042264241 | 1.235984691  | 0.221481351 | 2.096264368  | 0.04057024  |
| LOH12CR2  | -0.80820604  | 0.421171676 | 1.462263966  | 0.149104158 | 0.558577504  | 0.578667498 |
| LONP1     | 0.301023214  | 0.76411349  | 1.438583438  | 0.155680644 | 2.207187447  | 0.031398418 |
| LONP2     | 1.064149827  | 0.290199125 | 0.338090011  | 0.736524618 | 0.586918202  | 0.559607565 |
| LONRF1    | -0.265162087 | 0.791510502 | -0.915706151 | 0.3636391   | -2.009772084 | 0.049262228 |
| LONRF2    | -0.011309707 | 0.99100219  | -0.228506049 | 0.820062218 | -0.345203011 | 0.731229614 |
| LONRF3    | 0.54689506   | 0.585847848 | -0.865171069 | 0.390534214 | -0.659470728 | 0.512285189 |
| LOX       | -0.122701247 | 0.902626067 | -1.112786282 | 0.270423094 | -0.305561899 | 0.761066443 |
| LOXHD1    | -2.712989915 | 0.008033643 | -0.844861012 | 0.40168431  | -1.295504865 | 0.200438754 |
| LOXL1     | -0.389731151 | 0.697685742 | -2.069855054 | 0.042960863 | -2.794392257 | 0.007098124 |
| LOXL2     | 1.675302843  | 0.09745788  | 1.187514272  | 0.23989916  | -0.598577123 | 0.55185837  |
| LOXL3     | -0.445326445 | 0.657187584 | 1.715599194  | 0.091610765 | 1.693497361  | 0.095893601 |
| LOXL4     | 0.012895408  | 0.9897407   | -0.213677638 | 0.831553055 | 0.37262804   | 0.710826012 |
| LPAL2     | 1.686177472  | 0.095337077 | -1.563024412 | 0.123525121 | -0.413676487 | 0.68068442  |
| LPAR1     | 3.661720257  | 0.000428968 | -1.539808729 | 0.129083339 | -1.829232147 | 0.072668335 |
| LPAR2     | -1.635962032 | 0.105452596 | -0.780709227 | 0.438170514 | -0.119939089 | 0.904958864 |
| LPAR5     | -0.281096155 | 0.779302647 | -3.454837566 | 0.001040011 | -2.311969458 | 0.024465089 |
| LPAR6     | 0.288776075  | 0.773438205 | -0.299075209 | 0.76595916  | -0.79613235  | 0.429303091 |
| LPCAT1    | -2.378533545 | 0.01956531  | 0.076976007  | 0.938909408 | 1.396008207  | 0.168198921 |
| LPCAT2    | -0.059740451 | 0.952499072 | -1.045090573 | 0.300347498 | -2.538070638 | 0.013943186 |
| LPCAT3    | -1.065117351 | 0.2897636   | -0.523529647 | 0.602614321 | -0.281787109 | 0.779141121 |
| LPCAT4    | 0.281335828  | 0.779119436 | -1.439776511 | 0.155343989 | -1.41394943  | 0.162889023 |

|           |              |             |              |             |              |             |
|-----------|--------------|-------------|--------------|-------------|--------------|-------------|
| LPGAT1    | -1.701602905 | 0.092393409 | -0.405774728 | 0.68641165  | -1.324619498 | 0.190655207 |
| LPHN1     | 2.684759929  | 0.008686748 | -0.902395239 | 0.370605358 | 0.145284702  | 0.885005566 |
| LPIN1     | 2.896456538  | 0.004770253 | -0.42231268  | 0.67436915  | 0.174065058  | 0.862439427 |
| LPIN2     | -1.232263953 | 0.221163227 | 0.493851606  | 0.62328909  | -0.110297996 | 0.912565727 |
| LPL       | 0.218183546  | 0.827795959 | -1.58446355  | 0.11856409  | -1.815038284 | 0.074851947 |
| LPP       | -0.342731286 | 0.732625533 | -2.059260735 | 0.044000088 | -3.007441891 | 0.003934699 |
| LPP-AS2   | -0.533081812 | 0.595333156 | -0.998831678 | 0.32205417  | -1.190297342 | 0.238930041 |
| LPPR2     | -2.139674146 | 0.035175198 | -0.575832062 | 0.566971909 | -0.539497105 | 0.591673658 |
| LPPR3     | 0.939612896  | 0.350012004 | -3.360989438 | 0.001383921 | -2.155044513 | 0.035454317 |
| LPXN      | 0.914578882  | 0.362935149 | -0.404089674 | 0.687643326 | 0.461561783  | 0.646176044 |
| LRBA      | 0.149462812  | 0.881533638 | 1.162779092  | 0.249714256 | 1.364201977  | 0.17793889  |
| LRCH1     | 1.901318768  | 0.060563183 | 0.030730951  | 0.975590349 | -0.366707174 | 0.715213633 |
| LRCH3     | 0.295280229  | 0.76848184  | -0.076830415 | 0.939024723 | 0.010613755  | 0.991569171 |
| LRCH4     | -1.022801968 | 0.309230995 | -1.288894565 | 0.202587571 | -0.4754374   | 0.636316793 |
| LRFN1     | 0.337720356  | 0.736385688 | -1.530036103 | 0.131481916 | -1.17880344  | 0.243440009 |
| LRFN2     | 0.915654296  | 0.362373823 | 0.487075109  | 0.628053705 | -1.043442551 | 0.301208167 |
| LRFN3     | -0.013496754 | 0.989262311 | 0.523005146  | 0.602976944 | 1.280404709  | 0.20565889  |
| LRFN4     | 1.137175664  | 0.258580453 | -1.44605152  | 0.15358267  | -1.762931557 | 0.083345142 |
| LRG1      | -2.957658798 | 0.003988744 | -0.021204478 | 0.983155832 | -0.730962297 | 0.467836866 |
| LRGUK     | -1.318912605 | 0.190651967 | -0.559839322 | 0.577759923 | -0.47124325  | 0.639290063 |
| LRIF1     | -1.415706156 | 0.160423857 | -1.611992578 | 0.112430351 | -2.366739767 | 0.021413178 |
| LRIG1     | 1.242847009  | 0.217256234 | 1.634023476  | 0.10770879  | 1.396796901  | 0.167962728 |
| LRIG2     | 2.067104441  | 0.041689638 | 0.279957984  | 0.780512746 | 0.794868675  | 0.430031821 |
| LRIT3     | -0.303745692 | 0.762045318 | -0.395521531 | 0.693919242 | 0.060485896  | 0.951983092 |
| LRMP      | -1.749570241 | 0.083711075 | -0.058353186 | 0.953669286 | -1.176210372 | 0.244465913 |
| LRP1      | -1.283512943 | 0.202713267 | 1.097183667  | 0.277127104 | 0.803865575  | 0.424859608 |
| LRP10     | -1.491692769 | 0.139389139 | -0.666294568 | 0.507882957 | -1.435731256 | 0.156618021 |
| LRP11     | -1.03869994  | 0.301816294 | 1.307643238  | 0.196189961 | -0.599552244 | 0.551212709 |
| LRP12     | -0.93540019  | 0.352165672 | -0.836358685 | 0.40640969  | -4.081796521 | 0.00014268  |
| LRP2BP    | 2.159728285  | 0.033538705 | 0.281885084  | 0.779042002 | -0.149275969 | 0.881869921 |
| LRP3      | -0.722679304 | 0.471811002 | -1.517234282 | 0.13467746  | -1.561306582 | 0.1240618   |
| LRP5      | 1.32319301   | 0.189230757 | 0.618918059  | 0.538410654 | 0.471370518  | 0.639199753 |
| LRP5L     | 4.018905919  | 0.000123765 | 0.988274195  | 0.327151999 | 0.128431086  | 0.898266029 |
| LRP6      | 0.89782607   | 0.371750886 | 1.117699122  | 0.268335995 | 0.213846421  | 0.831440268 |
| LRP8      | 2.925029151  | 0.004389339 | -0.17187156  | 0.864140967 | -0.314139694 | 0.754577357 |
| LRPAP1    | -1.298593006 | 0.197507796 | 2.197342505  | 0.032032125 | 2.345646632  | 0.022545764 |
| LRPPRC    | 1.8546982    | 0.067019455 | 3.780272424  | 0.000374159 | 4.467684862  | 3.87E-05    |
| LRR1      | -1.254018051 | 0.213187216 | 0.186184606  | 0.852954193 | 0.420550874  | 0.675685799 |
| LRRC1     | 0.052008011  | 0.958641281 | 1.445228307  | 0.153812844 | 0.958688407  | 0.34181936  |
| LRRC14    | 2.13586931   | 0.035493394 | 0.549436311  | 0.584830166 | 0.760817627  | 0.449944396 |
| LRRC16A   | 0.517882103  | 0.605852146 | 1.035702816  | 0.304669747 | 1.984890821  | 0.052042608 |
| LRRC16B   | -0.451324474 | 0.652876292 | -1.835259191 | 0.07163229  | -1.640747429 | 0.106431805 |
| LRRC17    | 0.088424121  | 0.929742377 | -0.905999306 | 0.368710826 | -1.122627906 | 0.266365666 |
| LRRC20    | 0.597135061  | 0.55196478  | 1.237098154  | 0.22107082  | 2.381270238  | 0.020662839 |
| LRRC23    | 0.214612501  | 0.830570604 | 0.148492646  | 0.882472659 | -0.29254531  | 0.770946379 |
| LRRC25    | -2.824295641 | 0.005871661 | 0.544624261  | 0.588114507 | 0.27259725   | 0.786161284 |
| LRRC26    | 0.322646801  | 0.747735186 | -2.076240595 | 0.042344826 | -1.996691319 | 0.050707575 |
| LRRC27    | 0.147477837  | 0.883095378 | 2.793851923  | 0.007060536 | 3.212410972  | 0.002179349 |
| LRRC28    | -0.765840448 | 0.445839584 | 1.021680905  | 0.31120418  | 1.74791662   | 0.085936364 |
| LRRC29    | 0.461400843  | 0.64566009  | 0.782924941  | 0.436878559 | 0.740034552  | 0.462357389 |
| LRRC3     | -0.332355557 | 0.740418513 | -0.030487437 | 0.975783712 | 0.430669168  | 0.668355101 |
| LRRC32    | -2.075158843 | 0.040918699 | -0.364083944 | 0.717128508 | -1.511874398 | 0.136165296 |
| LRRC33    | -0.326273514 | 0.74499929  | -0.21623867  | 0.829565742 | -0.852602239 | 0.397496551 |
| LRRC34    | 0.372124989  | 0.710702726 | -1.290930102 | 0.201885526 | -1.438751388 | 0.155763562 |
| LRRC36    | 0.541987828  | 0.58920938  | 0.567256713  | 0.572744149 | -0.171150161 | 0.86472003  |
| LRRC37A   | 0.7783363    | 0.438477944 | -0.759447058 | 0.450682345 | 0.839104399  | 0.404963546 |
| LRRC37A2  | 0.791333297  | 0.430897005 | -0.13418753  | 0.893722083 | 0.441966161  | 0.660208668 |
| LRRC37A3  | 0.671456567  | 0.50370487  | 0.264735155  | 0.792158592 | -0.809678344 | 0.421537848 |
| LRRC37A4  | 0.791153201  | 0.431001521 | 0.21169703   | 0.833090728 | 0.20288475   | 0.839957383 |
| LRRC37B   | 0.358367213  | 0.720934755 | 0.10080163   | 0.920058008 | -0.929755637 | 0.356471554 |
| LRRC37BP1 | 0.454561935  | 0.650554134 | -3.373440575 | 0.001332775 | -2.323652963 | 0.023783348 |
| LRRC39    | 2.358082138  | 0.020606503 | -0.213135803 | 0.831973651 | -1.711208652 | 0.092553628 |
| LRRC4     | -3.460557451 | 0.000836755 | -1.530560005 | 0.131352437 | -1.705618144 | 0.093597364 |
| LRRC40    | 1.942596801  | 0.055292281 | -0.35757048  | 0.721971751 | -0.858979037 | 0.393998749 |
| LRRC41    | -0.720450004 | 0.473175107 | 1.538715231  | 0.12934998  | 2.183433324  | 0.033192519 |
| LRRC42    | 0.864661067  | 0.389597564 | 2.124078918  | 0.037968861 | 2.770536459  | 0.007570802 |
| LRRC43    | 1.204674653  | 0.231588769 | 0.437544484  | 0.663352887 | 1.086998578  | 0.281674541 |
| LRRC45    | 0.582509604  | 0.561726896 | 0.103342733  | 0.918049952 | 0.936547378  | 0.352996054 |
| LRRC46    | -0.419374086 | 0.675974242 | -0.005709561 | 0.995464184 | 0.523807113  | 0.602470994 |
| LRRC47    | 0.239393697  | 0.811362179 | 4.144924449  | 0.000112865 | 3.246735248  | 0.001969865 |
| LRRC48    | -0.915262828 | 0.36257809  | -1.064670096 | 0.291468334 | -2.325306115 | 0.023688264 |
| LRRC4B    | 1.200982696  | 0.233010404 | 1.17795518   | 0.243658683 | 1.097199163  | 0.277230287 |

|         |              |             |              |             |              |             |
|---------|--------------|-------------|--------------|-------------|--------------|-------------|
| LRRCS6  | 0.404115718  | 0.687117174 | -1.142553044 | 0.257951533 | -0.023113924 | 0.981641219 |
| LRRCS7  | -0.188266913 | 0.851104918 | -1.146743084 | 0.256229401 | -0.69791403  | 0.488106699 |
| LRRCS8  | 1.597759545  | 0.113714551 | -0.257290305 | 0.797871647 | -0.751219137 | 0.455652987 |
| LRRCS9  | -1.276997199 | 0.204993627 | 1.435780271  | 0.156473862 | 1.59200671   | 0.116989224 |
| LRRCS6  | 0.224477504  | 0.822910993 | -0.858746785 | 0.394040067 | -0.160993245 | 0.87267568  |
| LRRCS1  | -1.103657646 | 0.272778421 | 0.466219603  | 0.642816808 | 0.346834315  | 0.730010312 |
| LRRCS8  | 0.784842608  | 0.434673211 | -2.100420014 | 0.040081129 | -0.992040549 | 0.325427124 |
| LRRCS7  | 0.094420835  | 0.924991521 | -1.383233857 | 0.171931723 | -1.520261643 | 0.134048119 |
| LRRCS8A | 0.562189681  | 0.575429303 | 0.828643746  | 0.410726794 | 1.004707435  | 0.319341312 |
| LRRCS8B | 0.829517225  | 0.409077157 | -0.971441005 | 0.335390773 | -1.403082456 | 0.166089498 |
| LRRCS8C | 3.331272928  | 0.001269232 | -0.268422066 | 0.789333531 | 0.327967653  | 0.744154068 |
| LRRCS8D | 2.868668056  | 0.005169688 | -0.670386574 | 0.505290612 | -0.442600357 | 0.659752553 |
| LRRCS1  | -0.196680739 | 0.844535118 | 0.153890928  | 0.87823368  | -1.419253474 | 0.161344353 |
| LRRFIP1 | -1.408290619 | 0.162600913 | 0.023528955  | 0.98130967  | -2.09834194  | 0.040379006 |
| LRRFIP2 | -0.835867896 | 0.405514082 | 1.605066515  | 0.113948853 | 1.338513031  | 0.186115662 |
| LRRK1   | 0.074562631  | 0.940733515 | -0.689280012 | 0.493414669 | -1.541922907 | 0.128701068 |
| LRRK2   | -0.872332924 | 0.385422745 | -0.06461786  | 0.948702017 | -1.804297944 | 0.076540605 |
| LRRN1   | -1.098223606 | 0.275130408 | 0.064693243  | 0.948642258 | -0.210825668 | 0.833785383 |
| LRRN2   | 0.779076839  | 0.438043915 | 0.566460767  | 0.573281364 | 0.375219244  | 0.708908897 |
| LRRN3   | 1.605266823  | 0.112051257 | -0.592676819 | 0.555717356 | -0.03553899  | 0.971775805 |
| LRRTM2  | -0.467427489 | 0.641360205 | 0.963659046  | 0.339245506 | 1.267984276  | 0.210028141 |
| LRSAM1  | 0.927730735  | 0.356108399 | 1.753893118  | 0.084768408 | 2.674047777  | 0.009793076 |
| LRTOMT  | -0.194763921 | 0.846030884 | -0.814963961 | 0.418450082 | -1.279351903 | 0.206026594 |
| LRWD1   | -0.555567562 | 0.579929288 | -1.020452551 | 0.311781099 | -0.819784355 | 0.415800052 |
| LSG1    | 1.104626749  | 0.272360444 | 0.903340571  | 0.370107831 | 2.185839766  | 0.033006752 |
| LSM1    | 0.202860605  | 0.825717358 | -0.830600715 | 0.409629081 | -0.368282603 | 0.714045221 |
| LSM10   | -2.48902602  | 0.014708762 | -2.211130716 | 0.031010973 | -1.537605597 | 0.129752992 |
| LSM11   | 2.550345413  | 0.012507797 | -0.22960957  | 0.819208626 | -1.682146814 | 0.098085707 |
| LSM12   | -1.324888156 | 0.188670125 | -1.600281308 | 0.11500763  | -0.932178104 | 0.355229386 |
| LSM14A  | -0.211238028 | 0.833194493 | -0.919140664 | 0.361855379 | -1.55885353  | 0.124641401 |
| LSM14B  | -1.055151991 | 0.294270913 | -0.13336553  | 0.894369186 | 0.064479056  | 0.94881744  |
| LSM2    | 1.3891672    | 0.168319758 | -0.670840821 | 0.505003282 | -0.153575593 | 0.87849415  |
| LSM3    | 0.017890231  | 0.985767299 | -1.677547602 | 0.098854696 | -1.100200635 | 0.275931978 |
| LSM4    | 0.702994409  | 0.483932117 | 0.409403503  | 0.683762131 | 0.847451962  | 0.400335571 |
| LSM5    | 1.523072494  | 0.131359477 | -0.386691983 | 0.700409242 | 0.228144787  | 0.820361201 |
| LSM6    | -1.459892664 | 0.147913441 | -2.193163633 | 0.032347396 | -1.54976781  | 0.126807064 |
| LSM7    | 0.968316593  | 0.33556471  | -0.625223394 | 0.534293853 | -0.284126349 | 0.777357091 |
| LSMD1   | -0.131949743 | 0.895328064 | -0.932367587 | 0.355038625 | -0.744324519 | 0.459779184 |
| LSP1    | -2.646020948 | 0.009661585 | 0.7442561    | 0.459747329 | 0.916115164  | 0.363518369 |
| LSR     | 2.372638903  | 0.019860507 | 1.062567595  | 0.292413033 | 0.788289224  | 0.433837932 |
| LSS     | 2.650879682  | 0.009534102 | 0.626096437  | 0.533725124 | 0.717163328  | 0.476241598 |
| LST1    | -2.196399901 | 0.030716977 | -0.086948118 | 0.93101433  | 0.209046684  | 0.835167181 |
| LTA     | -0.195725068 | 0.845280794 | -0.755248768 | 0.453177177 | -0.271646954 | 0.786888248 |
| LTA4H   | 0.016867316  | 0.986581005 | 3.088445717  | 0.003094328 | 1.705264334  | 0.093663745 |
| LTB     | -0.320693536 | 0.749210019 | -2.02579317  | 0.047427291 | -1.276953904 | 0.206865953 |
| LTB4R   | -2.61821216  | 0.010421429 | -1.474522028 | 0.145786417 | -1.348529498 | 0.182894128 |
| LTB4R2  | 1.402645488  | 0.164273358 | -3.940599276 | 0.00022234  | -3.726781636 | 0.000451832 |
| LTBP1   | -2.788085657 | 0.006508138 | 4.03200587   | 0.000164492 | 1.886499643  | 0.064394575 |
| LTBP2   | 0.230707574  | 0.818082478 | 0.070377633  | 0.944136885 | -1.250166597 | 0.216415966 |
| LTBP3   | 1.248674705  | 0.215126479 | -0.832352851 | 0.408647784 | 0.341281499  | 0.734163558 |
| LTBP4   | 1.431898693  | 0.15574802  | -0.827595603 | 0.41131546  | -0.403470616 | 0.688132069 |
| LTBR    | -0.545224178 | 0.586991412 | 0.350595412  | 0.727170938 | -0.899479631 | 0.372232716 |
| LTC4S   | -0.462691049 | 0.644738535 | -1.625618637 | 0.109490717 | -2.400831262 | 0.01968992  |
| LTF     | -3.934248473 | 0.000167218 | 2.625882607  | 0.011051558 | 1.272286686  | 0.208506896 |
| LTK     | 1.989569336  | 0.049772474 | -1.792304808 | 0.078336668 | -0.430353791 | 0.668583107 |
| LTN1    | 1.01805319   | 0.31146935  | -0.750114137 | 0.456239278 | -1.986301325 | 0.05188146  |
| LTV1    | 2.052149957  | 0.043154233 | 1.02134343   | 0.311362609 | 2.3076067    | 0.024724084 |
| LUC7L   | 1.742441732  | 0.084957199 | 1.635147876  | 0.107472201 | 2.963967324  | 0.004447187 |
| LUC7L2  | 2.137826469  | 0.035329407 | 2.266567065  | 0.02718913  | 2.703176921  | 0.009066178 |
| LUC7L3  | 2.539279625  | 0.012881602 | -0.384723118 | 0.701859507 | -0.497670695 | 0.620656641 |
| LUZP1   | -1.302710202 | 0.196104028 | 1.286277035  | 0.203493022 | 1.006632645  | 0.318423081 |
| LXN     | -0.91596229  | 0.362213163 | -1.590485215 | 0.117199885 | -2.057615649 | 0.044274167 |
| LY6E    | -0.91559031  | 0.362407205 | 1.711847833  | 0.092304899 | -0.421036804 | 0.675333013 |
| LY6G5B  | 0.744027208  | 0.458860505 | 0.826774578  | 0.41177693  | 2.090443705  | 0.041110219 |
| LY6G5C  | -0.604023794 | 0.547396269 | 1.100085718  | 0.275871453 | 1.402799335  | 0.166173526 |
| LY6G6E  | -2.961963342 | 0.003938494 | 1.035006906  | 0.304991832 | 0.986716506  | 0.328008039 |
| LY6G6F  | -4.87075044  | 4.93E-06    | 1.738097314  | 0.087537626 | 0.394462919  | 0.694731292 |
| LY75    | -2.094912509 | 0.039079793 | -0.134449196 | 0.893516106 | 0.281732973  | 0.779182421 |
| LY86    | -1.026196601 | 0.307637567 | 0.800266384  | 0.426845024 | 1.074763472  | 0.28707037  |
| LY9     | 2.799016623  | 0.006309644 | -0.955675952 | 0.343230057 | 0.507583977  | 0.613730101 |
| LY96    | -0.898765592 | 0.371252939 | -1.278386734 | 0.206240711 | -1.484940599 | 0.143143749 |
| LYAR    | 1.126660322  | 0.262977469 | -0.561729231 | 0.57647992  | 0.861310834  | 0.392724503 |

|          |              |             |              |             |              |             |
|----------|--------------|-------------|--------------|-------------|--------------|-------------|
| LYG1     | 1.022931036  | 0.30917031  | 1.069889324  | 0.28913233  | 2.248290211  | 0.028495138 |
| LYL1     | -2.520058937 | 0.013554843 | -0.099617468 | 0.920993948 | -1.110671236 | 0.271436207 |
| LYN      | -2.079602315 | 0.040498669 | 0.298931981  | 0.766067889 | -0.921117679 | 0.360923688 |
| LYNX1    | 0.193876462  | 0.846723595 | 0.314790233  | 0.754058502 | 0.625048289  | 0.534467467 |
| LYPD2    | 1.292519761  | 0.199592119 | -2.200318993 | 0.031809217 | -1.743926082 | 0.086636171 |
| LYPD3    | -0.024351646 | 0.980627765 | -0.489807375 | 0.626130695 | 0.389559862  | 0.698333422 |
| LYPD6B   | -1.563747654 | 0.121499347 | -0.28622909  | 0.775729683 | -1.660122697 | 0.102456403 |
| LYPLA1   | -0.140538209 | 0.888558939 | -1.706980365 | 0.093212006 | -2.495406296 | 0.015541771 |
| LYPLA2   | -1.49740321  | 0.137899966 | 0.884612866  | 0.380043483 | 1.524890575  | 0.132890891 |
| LYPLAL1  | 1.516768922  | 0.13294251  | -0.765027776 | 0.447378393 | -0.879075828 | 0.383100973 |
| LYRM1    | -1.283161827 | 0.202835668 | 1.65021886   | 0.104341648 | 1.202134845  | 0.234348845 |
| LYRM2    | 0.564909307  | 0.573586086 | -0.103272262 | 0.918105633 | -0.161996985 | 0.871888873 |
| LYRM4    | -0.122984619 | 0.90240233  | -0.237195364 | 0.813346894 | 0.172222723  | 0.863880726 |
| LYRM5    | -0.007578241 | 0.99397081  | -1.526952201 | 0.13224614  | -1.199272959 | 0.235450516 |
| LYRM7    | 0.502795482  | 0.61637577  | -1.356517041 | 0.180228268 | -0.381422026 | 0.704327442 |
| LYSMD1   | -1.743300563 | 0.084806264 | 0.680704745  | 0.498785783 | 1.994014425  | 0.051007811 |
| LYSMD2   | -1.150126068 | 0.253236777 | -0.295279466 | 0.768842238 | -1.247203587 | 0.217492019 |
| LYSMD3   | 0.020521359  | 0.983674364 | -1.003782511 | 0.319682011 | -1.806811227 | 0.07614262  |
| LYSMD4   | 3.177045593  | 0.002058352 | 0.286905004  | 0.77521467  | 1.699113451  | 0.09482396  |
| LYST     | 0.254203039  | 0.79993725  | -1.029011461 | 0.307776279 | -2.618098356 | 0.01134071  |
| LYVE1    | -1.002677843 | 0.318790978 | -0.537259644 | 0.593157912 | -0.668557169 | 0.506513051 |
| LYZ      | -0.3934026   | 0.694982494 | 0.94989872   | 0.346132671 | 0.483580793  | 0.63056105  |
| LZIC     | -0.731538565 | 0.466411887 | 0.582724814  | 0.562353094 | 2.028510198  | 0.04725369  |
| LZTFL1   | 0.56949692   | 0.570483316 | -1.958876238 | 0.054974788 | -1.172510161 | 0.245935231 |
| LZTR1    | 1.238472316  | 0.218865092 | -2.044939473 | 0.045439473 | -1.155664874 | 0.25270467  |
| LZTS1    | -2.331543847 | 0.022030689 | 1.947683112  | 0.056332751 | 0.050468666  | 0.959927753 |
| LZTS2    | 1.472676141  | 0.144439228 | 0.785962104  | 0.435111292 | 1.207479443  | 0.232301515 |
| M6PR     | 2.052401936  | 0.043129193 | 0.600426802  | 0.550577176 | -0.154538321 | 0.87773859  |
| MAB21L3  | -0.541097564 | 0.589820194 | 2.075953466  | 0.042372361 | 1.26088283   | 0.212557088 |
| MACC1    | 0.49094524   | 0.624698629 | 1.483432436  | 0.143411352 | 1.652236668  | 0.10405957  |
| MACF1    | 1.58152524   | 0.117379011 | 1.112231192  | 0.270659626 | 1.215846351  | 0.229122668 |
| MACROD1  | 1.553362174  | 0.123959149 | -0.703697809 | 0.484456184 | -0.336229711 | 0.737949013 |
| MACROD2  | -0.796604788 | 0.427844407 | 0.248589619  | 0.804562495 | 0.132496729  | 0.895064354 |
| MAD1L1   | -0.435855013 | 0.664019153 | 1.916770374  | 0.060232819 | 1.60509985   | 0.114073448 |
| MAD2L1   | 1.43888846   | 0.153762424 | -0.268001457 | 0.789655675 | 0.169391825  | 0.866096306 |
| MAD2L1BP | -1.266789392 | 0.20860418  | 1.525000347  | 0.132731653 | 1.099742736  | 0.27612977  |
| MAD2L2   | -0.411222656 | 0.681918306 | -0.232167291 | 0.817231035 | -0.88828846  | 0.378169281 |
| MADCAM1  | -1.362046657 | 0.176691809 | -2.286061151 | 0.025947838 | -1.775844393 | 0.081168977 |
| MADD     | -0.684086891 | 0.495734534 | 2.202296651  | 0.031661867 | 1.988243813  | 0.051660236 |
| MAEA     | -1.496007538 | 0.138262774 | 0.392487703  | 0.696146635 | 0.586317704  | 0.560008154 |
| MAF      | -0.981103422 | 0.329256338 | -1.277650262 | 0.206498581 | -3.311285239 | 0.001626309 |
| MAF1     | -1.846368077 | 0.068231728 | -0.731894255 | 0.467200771 | -1.051476003 | 0.297537349 |
| MAFB     | -1.504481466 | 0.136071443 | 1.3508958    | 0.18201212  | -0.265113807 | 0.791891158 |
| MAFF     | -1.068933734 | 0.288050043 | -2.436992206 | 0.017921193 | -3.022945409 | 0.003765662 |
| MAFG     | 1.924190118  | 0.057592611 | 0.585664605  | 0.560388837 | 0.487183451  | 0.628021993 |
| MAFK     | 0.698017058  | 0.487023957 | -1.801994539 | 0.076780163 | -1.209320722 | 0.231599212 |
| MAGED1   | 0.251331035  | 0.802149591 | 2.181876814  | 0.033212594 | 3.092884339  | 0.003084026 |
| MAGED2   | 1.278445152  | 0.204485244 | 4.241287725  | 8.15E-05    | 5.160332619  | 3.33E-06    |
| MAGEE1   | 2.184153872  | 0.031635299 | -0.45800821  | 0.648669848 | -0.459467294 | 0.647669889 |
| MAGEF1   | 2.538066039  | 0.012923203 | -0.540555148 | 0.590898586 | -0.569864682 | 0.571039077 |
| MAGEH1   | 2.629380962  | 0.01010998  | 0.119856256  | 0.90501412  | -0.244368955 | 0.80783448  |
| MAGI3    | 0.066185765  | 0.947381458 | -0.186616529 | 0.85261707  | -0.060506142 | 0.95196704  |
| MAGIX    | -0.485564201 | 0.628494155 | 0.97336172   | 0.334443833 | 1.453187678  | 0.151729326 |
| MAGOH    | -0.791104003 | 0.431030074 | -2.830812298 | 0.006383434 | -2.836212153 | 0.006334609 |
| MAGOHB   | 0.354143776  | 0.724086165 | -2.478838488 | 0.016131956 | -1.912737841 | 0.060879    |
| MAGT1    | 1.388830299  | 0.168421868 | -1.782040427 | 0.080014138 | -2.759701036 | 0.007794922 |
| MAK      | -0.867669933 | 0.387956896 | -0.974305687 | 0.333979093 | -2.572305203 | 0.012769887 |
| MAK16    | 0.340553956  | 0.734258586 | -1.543817977 | 0.128109461 | -0.424977921 | 0.672474466 |
| MAL      | 1.024208469  | 0.308570117 | 3.174746323  | 0.002408315 | 3.245424216  | 0.001977505 |
| MALAT1   | -0.654119601 | 0.514756413 | -1.35280504  | 0.181404738 | -1.624151186 | 0.109936036 |
| MALT1    | 1.903777548  | 0.060237755 | -0.945098664 | 0.348556499 | -1.012188618 | 0.315783119 |
| MAMDC4   | 1.403365862  | 0.164059207 | -1.341090775 | 0.185155779 | -0.870897571 | 0.387512683 |
| MAML1    | -0.961760979 | 0.338829417 | -2.029669699 | 0.047018866 | -2.288100165 | 0.02591215  |
| MAML2    | -0.123591578 | 0.90192313  | 1.239849923  | 0.22005865  | -1.412252688 | 0.163385568 |
| MAML3    | -2.143367922 | 0.034868663 | 1.020923063  | 0.311560029 | -0.146792988 | 0.883820397 |
| MAMLD1   | 0.668883555  | 0.505336961 | 0.352321961  | 0.725882763 | 1.346467004  | 0.183553982 |
| MAMSTR   | 2.474601619  | 0.015274507 | 1.417907155  | 0.161605617 | 1.095794466  | 0.277839366 |
| MAN1A1   | -1.289796213 | 0.200532125 | -1.433743094 | 0.157052297 | -3.690276357 | 0.000507217 |
| MAN1A2   | 1.253528535  | 0.213364341 | -1.183516611 | 0.241466276 | -2.485709985 | 0.015927428 |
| MAN1B1   | -0.198613546 | 0.843027452 | 2.512293986  | 0.014819166 | 2.62521665   | 0.01113213  |
| MAN1C1   | 2.104351249  | 0.038226625 | 0.178665501  | 0.858827335 | 0.930663358  | 0.356005773 |
| MAN2A1   | 0.437451933  | 0.662865311 | -0.493062684 | 0.623842962 | -1.245751053 | 0.218020966 |

|           |              |             |              |             |              |             |
|-----------|--------------|-------------|--------------|-------------|--------------|-------------|
| MAN2A2    | -1.556577935 | 0.123193306 | -1.187482063 | 0.239911757 | -1.914233846 | 0.060683572 |
| MAN2B1    | -0.166467129 | 0.868174789 | 0.149628407  | 0.881580516 | 0.208967397  | 0.835228778 |
| MAN2B2    | -0.83125093  | 0.408102577 | 0.017941924  | 0.985747193 | -0.036101592 | 0.971329196 |
| MAN2C1    | 1.201148235  | 0.232946527 | 0.924239875  | 0.35921749  | 0.428402452  | 0.669994547 |
| MANBA     | -0.54931441  | 0.584193893 | 1.579862901  | 0.119614952 | 0.611633215  | 0.543245253 |
| MANBAL    | -0.315817062 | 0.752896118 | -0.813977203 | 0.419010555 | -1.138877649 | 0.259582381 |
| MANEA     | 0.309771429  | 0.757473937 | -0.794694103 | 0.430053952 | -1.961744961 | 0.054749013 |
| MANEAL    | -0.509960857 | 0.611367399 | -0.759485735 | 0.450659398 | -0.242953734 | 0.808925215 |
| MANF      | 0.35420206   | 0.724042642 | -3.280377502 | 0.001762734 | -2.779436336 | 0.007391171 |
| MANSC1    | -3.482370302 | 0.000779177 | 0.327191336  | 0.744709377 | -0.164321418 | 0.870067309 |
| MAP1A     | -1.294580305 | 0.198883121 | 2.184236862  | 0.033030021 | 1.092237792  | 0.279385725 |
| MAP1B     | -0.453974346 | 0.650975343 | 2.406744456  | 0.019323539 | 2.066575467  | 0.043390341 |
| MAP1LC3A  | -2.173807449 | 0.032429746 | -1.046956002 | 0.299493648 | -1.540972803 | 0.128931978 |
| MAP1LC3B  | -4.561438432 | 1.65E-05    | -0.172522584 | 0.863631515 | -0.324360738 | 0.746868355 |
| MAP1LC3B2 | -1.670373946 | 0.098431683 | 0.793811567  | 0.430563498 | 0.193410818  | 0.847334113 |
| MAP1LC3C  | -1.668875457 | 0.098729301 | 4.476740662  | 3.64E-05    | 3.486278791  | 0.000957497 |
| MAP1S     | -0.88852709  | 0.376702052 | 0.397967573  | 0.692125365 | 0.099256185  | 0.921287837 |
| MAP2      | 0.666486031  | 0.506860284 | 0.669697505  | 0.505726646 | 0.9190919    | 0.361972969 |
| MAP2K1    | -1.38609561  | 0.169252461 | 0.584689771  | 0.561039806 | -0.116268195 | 0.907854198 |
| MAP2K2    | -1.07071359  | 0.28725327  | 0.799242568  | 0.427433536 | 0.900892145  | 0.371487659 |
| MAP2K3    | -2.810048273 | 0.006114956 | 0.740484489  | 0.462014112 | 0.816291442  | 0.417813143 |
| MAP2K4    | -3.510671341 | 0.000710036 | -0.590866912 | 0.556921231 | -0.976566509 | 0.332966093 |
| MAP2K5    | -0.166725855 | 0.867971815 | 2.687088764  | 0.009405074 | 2.382055524  | 0.020622966 |
| MAP2K6    | -1.581431525 | 0.117400435 | 2.116240153  | 0.038657689 | 1.364013372  | 0.177997906 |
| MAP2K7    | -0.621525519 | 0.535875621 | -4.037805006 | 0.000161359 | -3.800157667 | 0.000357523 |
| MAP3K1    | 0.246309358  | 0.806021721 | -0.267438337 | 0.790087028 | -1.960964146 | 0.054842376 |
| MAP3K10   | 0.879188351  | 0.381715827 | -3.633157723 | 0.000597472 | -3.125574521 | 0.002806706 |
| MAP3K11   | -1.046755847 | 0.298105404 | -2.192115604 | 0.032426891 | -2.586014508 | 0.01232574  |
| MAP3K12   | 3.106892288  | 0.002551927 | 0.99954435   | 0.321711974 | 1.548179154  | 0.127188806 |
| MAP3K13   | -0.838017157 | 0.404312514 | -1.587777625 | 0.117811715 | -1.543860821 | 0.128231109 |
| MAP3K14   | -0.453325068 | 0.651440906 | 0.609143282  | 0.544824803 | 1.052939687  | 0.296871851 |
| MAP3K15   | -0.935564482 | 0.352081521 | -1.814852896 | 0.074754689 | -0.482567365 | 0.631276097 |
| MAP3K2    | 0.051028289  | 0.959419702 | -0.239440142 | 0.811614337 | -1.638069847 | 0.106990937 |
| MAP3K3    | -1.810547148 | 0.073655575 | 0.012966767  | 0.989699118 | -0.371737535 | 0.711485291 |
| MAP3K4    | 1.846727341  | 0.068179069 | 2.060714669  | 0.043856191 | 1.972852498  | 0.053435542 |
| MAP3K5    | -2.01502007  | 0.046983105 | 0.731870855  | 0.467214945 | -0.493237649 | 0.623765332 |
| MAP3K6    | 1.633760663  | 0.105915152 | -0.408780862 | 0.684216464 | 1.060797401  | 0.293316641 |
| MAP3K7    | 0.77240329   | 0.441964342 | -1.388124073 | 0.170445391 | -2.262828924 | 0.027526539 |
| MAP3K8    | -0.09253098  | 0.92648846  | -1.217384943 | 0.228422113 | -2.884126791 | 0.005553455 |
| MAP3K9    | 1.053321339  | 0.295104085 | -0.467216194 | 0.64210798  | 0.173221635  | 0.863099197 |
| MAP4      | 0.033870008  | 0.973058229 | 1.411441111  | 0.163493955 | 1.517539448  | 0.134732394 |
| MAP4K1    | -0.042350028 | 0.966316498 | 1.328724138  | 0.189179299 | 2.251895637  | 0.028252167 |
| MAP4K2    | -0.674822833 | 0.501573891 | -0.214115844 | 0.831212936 | 0.168398403  | 0.866874056 |
| MAP4K3    | 1.008357199  | 0.316073266 | -0.024026193 | 0.980914763 | -1.600648261 | 0.115058133 |
| MAP4K4    | -1.374351342 | 0.172855052 | 1.064019126  | 0.291760603 | 1.230348791  | 0.223688263 |
| MAP4K5    | 0.977323222  | 0.331113105 | -0.898720309 | 0.372543515 | -2.515537567 | 0.014767899 |
| MAP6D1    | 1.622834006  | 0.108235362 | 1.609819539  | 0.112905006 | 1.815841401  | 0.074726941 |
| MAP7      | -2.393718932 | 0.018822727 | -0.606032636 | 0.546874131 | -0.880494256 | 0.382339039 |
| MAP7D1    | -1.300037325 | 0.197014502 | 0.502588833  | 0.617169693 | 0.146020167  | 0.884427625 |
| MAP7D2    | 1.342011027  | 0.18307681  | -0.759054168 | 0.45091548  | -0.627174345 | 0.533083117 |
| MAP7D3    | -1.037853573 | 0.302207974 | 1.197141856  | 0.236155295 | 1.768715077  | 0.082364533 |
| MAP9      | 1.566646187  | 0.120819805 | -0.862147866 | 0.392181604 | -1.347311121 | 0.183283705 |
| MAPK1     | -1.865811349 | 0.0654303   | -0.441934426 | 0.660191583 | -1.015563763 | 0.31418662  |
| MAPK11    | 1.121065965  | 0.265338045 | 0.969703977  | 0.336248677 | 1.324779625  | 0.190602415 |
| MAPK13    | 2.167375352  | 0.032932349 | 0.397787923  | 0.692257058 | 0.855896348  | 0.395687272 |
| MAPK14    | -1.058674754 | 0.29267214  | 0.286587221  | 0.775456792 | -0.700233014 | 0.486668676 |
| MAPK1IP1L | -0.379606316 | 0.705160703 | -0.34278034  | 0.733011601 | -0.189234697 | 0.850590193 |
| MAPK3     | -1.669410144 | 0.098623022 | -1.545381043 | 0.127731372 | -1.856912502 | 0.068563783 |
| MAPK6     | 1.18688289   | 0.238497633 | -0.236410927 | 0.813952557 | -0.575277104 | 0.567398617 |
| MAPK7     | 0.219485935  | 0.826784566 | -2.421238562 | 0.018639724 | -2.714167343 | 0.008805018 |
| MAPK8     | 0.043106984  | 0.96571482  | -1.932784274 | 0.058184669 | -3.566917277 | 0.000746493 |
| MAPK8IP1  | 1.438070879  | 0.15399366  | 1.367405589  | 0.176810841 | 2.607096329  | 0.011670105 |
| MAPK8IP2  | 0.851401381  | 0.396878798 | -0.950610987 | 0.345773947 | -0.887230251 | 0.378733711 |
| MAPK8IP3  | 1.523854083  | 0.131164235 | -2.090369986 | 0.041008907 | -1.211319137 | 0.230838727 |
| MAPK9     | 1.304374323  | 0.195538757 | 0.340168515  | 0.734967134 | 1.177213752  | 0.244068573 |
| MAPKAP1   | -0.332648238 | 0.74019831  | 1.411314763  | 0.163531023 | 1.402293346  | 0.166323781 |
| MAPKAPK2  | -2.54756966  | 0.012600633 | -1.207844668 | 0.232043289 | -1.18133078  | 0.242443102 |
| MAPKAPK3  | -2.528687339 | 0.013248799 | -0.572760114 | 0.569036386 | -0.80282876  | 0.425453752 |
| MAPKAPK5  | 1.83435813   | 0.070011761 | 2.56001951   | 0.013113372 | 2.002793571  | 0.050028834 |
| MAPKBP1   | 0.838714311  | 0.403923229 | -0.346784349 | 0.730017162 | 0.653224936  | 0.516273148 |
| MAPRE1    | -2.052522276 | 0.043117239 | 0.442677752  | 0.659656909 | 0.611660147  | 0.543227558 |
| MAPRE2    | -1.91458428  | 0.058824883 | -1.71170526  | 0.092331365 | -1.495034198 | 0.14049621  |

|           |              |             |              |             |              |             |
|-----------|--------------|-------------|--------------|-------------|--------------|-------------|
| MAPRE3    | -0.765082197 | 0.446288584 | -1.678531087 | 0.098661727 | -0.597539398 | 0.552545903 |
| MAPT      | -0.883025678 | 0.379650625 | -0.353658877 | 0.724885838 | -0.218148499 | 0.828103081 |
| MARCH1    | 1.309886352  | 0.193675102 | -0.109964296 | 0.912819947 | -0.787585806 | 0.434246028 |
| MARCH2    | -2.842402665 | 0.005575268 | 0.156477685  | 0.876203701 | -0.532747452 | 0.596307363 |
| MARCH3    | 0.309292808  | 0.757836726 | 0.014548615  | 0.988442572 | 0.123798983  | 0.901915859 |
| MARCH5    | 0.354015451  | 0.724181992 | -1.408323948 | 0.164410365 | -1.748660083 | 0.085806505 |
| MARCH6    | 1.69861243   | 0.092958213 | -1.262656668 | 0.211800827 | -2.020581888 | 0.048094731 |
| MARCH7    | -0.317694284 | 0.751476453 | -0.501848029 | 0.61768749  | -1.490533644 | 0.141671885 |
| MARCH8    | -3.094391008 | 0.002650688 | 0.613871166  | 0.541717536 | -0.324087702 | 0.747073953 |
| MARCH9    | 1.574198575  | 0.119063404 | 0.338178392  | 0.736458369 | 0.498988683  | 0.619733734 |
| MARCKS    | -2.567823189 | 0.011937267 | -0.427451158 | 0.670644629 | -1.54544026  | 0.127849096 |
| MARCKSL1  | -2.644853665 | 0.009692441 | 1.595817538  | 0.116002432 | 2.369933561  | 0.021246195 |
| MARCO     | 0.134524453  | 0.893297931 | 2.209383929  | 0.031138734 | 2.355787984  | 0.021994719 |
| MARK2     | -2.119919958 | 0.036854557 | -1.261667381 | 0.212154192 | -1.13847115  | 0.259750558 |
| MARK3     | -4.042922045 | 0.00011356  | -0.007968086 | 0.99366999  | 0.593833549  | 0.555004686 |
| MARK4     | -0.838799654 | 0.40387559  | -1.050462351 | 0.297893214 | -0.77730998  | 0.440233589 |
| MARS      | -0.416900257 | 0.677776021 | 1.621614346  | 0.110348047 | 2.343414025  | 0.022668719 |
| Mar-02    | 1.141609957  | 0.256741866 | -1.625239128 | 0.109571739 | -2.509683505 | 0.014989262 |
| MARVELD1  | 0.473033438  | 0.63737143  | 1.750531951  | 0.085351497 | 0.737963686  | 0.463604906 |
| MASP2     | 1.446674217  | 0.151573819 | -0.811822511 | 0.420235983 | 1.029123424  | 0.307827693 |
| MAST1     | 0.671421948  | 0.50372681  | 0.118082016  | 0.906413517 | 0.037558625  | 0.970172607 |
| MAST2     | 0.132035793  | 0.895260203 | -0.27516791  | 0.784171966 | 0.448778077  | 0.655316326 |
| MAST3     | -1.644371182 | 0.10370064  | -0.888489266 | 0.377973233 | -0.322531178 | 0.748246378 |
| MAST4     | 2.752030719  | 0.007204035 | -0.58265197  | 0.562401809 | -1.139802237 | 0.259200147 |
| MASTL     | 0.382816818  | 0.702787276 | -0.721041084 | 0.473800884 | -1.244031903 | 0.218648227 |
| MAT2A     | 2.6615591    | 0.009259243 | -0.429106032 | 0.669446887 | -0.913841601 | 0.364701561 |
| MAT2B     | -0.305410767 | 0.760781269 | 0.34802553   | 0.729089787 | -0.360193493 | 0.720051737 |
| MATK      | 0.868466314  | 0.387523365 | -1.954230109 | 0.055535024 | -0.843504842 | 0.402519814 |
| MATL2963  | 1.677436167  | 0.097038835 | 0.337717432  | 0.736803921 | 0.635283733  | 0.527819958 |
| MATN2     | 2.630412378  | 0.010081648 | 0.996478925  | 0.323185599 | 0.769539612  | 0.444793376 |
| MATR3     | 1.456841006  | 0.14875233  | 1.431758085  | 0.157617518 | 1.307399824  | 0.196397078 |
| MAU2      | -0.219899046 | 0.826463818 | -0.478946215 | 0.633790243 | -0.580416728 | 0.563952242 |
| MAVS      | -0.448474209 | 0.654923561 | 0.98333774   | 0.329553988 | 1.411673767  | 0.163555254 |
| MAX       | -3.476070978 | 0.000795409 | -2.945041829 | 0.004651523 | -3.050812689 | 0.003478741 |
| MAZ       | -0.142272206 | 0.88719325  | -2.314865552 | 0.024205712 | -1.484127861 | 0.143358628 |
| MB21D1    | -2.080166476 | 0.040445607 | 0.266897983  | 0.790501003 | -0.453568048 | 0.65188521  |
| MB21D2    | -1.09317783  | 0.277326919 | 1.103023055  | 0.274604596 | 0.005689693  | 0.995480442 |
| MBD1      | -0.313624116 | 0.754555629 | -0.575233295 | 0.56737402  | -0.217550773 | 0.828566557 |
| MBD2      | -1.924189027 | 0.05759275  | 0.259603706  | 0.796095175 | 0.196394063  | 0.845009741 |
| MBD3      | 0.206597028  | 0.836806279 | 1.216378254  | 0.228802259 | 1.779185217  | 0.080613732 |
| MBD4      | -0.406393626 | 0.685449184 | 2.421120602  | 0.0186452   | 3.01672505   | 0.003832653 |
| MBD5      | 0.287063429  | 0.774744868 | -1.635649202 | 0.107366851 | -0.955935477 | 0.343196236 |
| MBD6      | -0.941783447 | 0.348905675 | -3.301628706 | 0.001654333 | -2.927406121 | 0.00492556  |
| MBIP      | 1.386785236  | 0.16904271  | -0.387466788 | 0.699838827 | 0.142679361  | 0.887053393 |
| MBLAC1    | -0.609781618 | 0.543592416 | -1.006095768 | 0.318577659 | -0.637218562 | 0.526568244 |
| MBLAC2    | 1.664273036  | 0.099647972 | -1.519481242 | 0.134112166 | -2.263827156 | 0.027461117 |
| MBNL1     | 0.50122538   | 0.617475663 | -0.829522375 | 0.410233727 | -1.750064333 | 0.085561672 |
| MBNL2     | 0.873237949  | 0.384932095 | -1.158982335 | 0.251245977 | -1.750204814 | 0.085537211 |
| MBNL3     | -2.778115198 | 0.006694155 | -1.700484985 | 0.094433915 | -1.159857865 | 0.251007339 |
| MBOAT1    | -0.25634391  | 0.798289172 | -1.856811927 | 0.068454283 | -2.150899511 | 0.035795613 |
| MBOAT2    | -0.976221215 | 0.331655686 | 0.833885633  | 0.407790517 | -0.052549616 | 0.958276986 |
| MBOAT4    | 2.559270019  | 0.012213471 | 2.099258437  | 0.040187419 | 1.96730782   | 0.054087786 |
| MBOAT7    | -2.178150902 | 0.032094142 | -0.464812606 | 0.643818108 | -0.563104728 | 0.575601878 |
| MBP       | -2.488857474 | 0.014715263 | -0.63491594  | 0.527997467 | -1.162554388 | 0.249920106 |
| MBTD1     | 0.1524546    | 0.879180643 | -1.379633163 | 0.173032466 | -2.184547615 | 0.033106386 |
| MBTPS1    | 2.44806146   | 0.016366574 | 1.81135114   | 0.075301806 | 1.915198585  | 0.060557828 |
| MBTPS2    | 0.815555363  | 0.416976868 | 0.126306423  | 0.899929259 | 0.242551746  | 0.809235103 |
| MC1R      | 1.845627335  | 0.06834041  | -1.800570177 | 0.07700733  | 0.023485828  | 0.98134588  |
| MCAM      | -0.099458349 | 0.92100268  | 0.202122819  | 0.840532942 | -0.363504198 | 0.717591223 |
| MCART1    | -0.897726992 | 0.371803422 | -2.067927755 | 0.043148317 | -1.804029563 | 0.076583207 |
| MCART6    | 1.618887946  | 0.109083276 | -1.28737189  | 0.203113925 | -1.618522294 | 0.111145605 |
| MCAT      | -0.009109603 | 0.992752501 | 0.810932841  | 0.420742591 | 0.417761375  | 0.677712393 |
| MCC       | 0.171716921  | 0.86405801  | 0.717850413  | 0.475751181 | -0.24665566  | 0.806072888 |
| MCCC1     | 2.470303589  | 0.01544681  | 0.85594813   | 0.395573439 | 2.022345066  | 0.047906583 |
| MCCC2     | 1.46737319   | 0.145872631 | -0.833368884 | 0.408079406 | -0.047361833 | 0.962392644 |
| MCEE      | -0.392102688 | 0.695939156 | -1.216152812 | 0.228887454 | -1.884908386 | 0.064613208 |
| MCF2      | 1.291217896  | 0.200041036 | 0.509539913  | 0.612320661 | 0.201189154  | 0.841276593 |
| MCF2L     | 3.530638257  | 0.000664789 | 0.457135763  | 0.649293044 | 1.016868546  | 0.3135709   |
| MCF2L-AS1 | -0.40724471  | 0.68482638  | -1.056494122 | 0.29515382  | -0.076798157 | 0.939056694 |
| MCF2L2    | -0.398910367 | 0.690934584 | -0.669479643 | 0.505864549 | -1.457375609 | 0.150574422 |
| MCFD2     | 0.060745468  | 0.951700946 | -0.159680723 | 0.87369125  | -0.277876246 | 0.782126418 |
| MCHR1     | 0.753187064  | 0.453366501 | -1.161478591 | 0.25023816  | 0.250273164  | 0.803288166 |

|            |              |             |              |             |              |             |
|------------|--------------|-------------|--------------|-------------|--------------|-------------|
| MCL1       | -1.160492987 | 0.249015856 | -0.880105505 | 0.382459681 | -2.395624485 | 0.019944799 |
| MCM10      | 1.383757579  | 0.169965055 | 1.836476606  | 0.07144953  | 1.207457229  | 0.232309997 |
| MCM2       | 1.319980009  | 0.190296814 | 2.645192676  | 0.010505711 | 3.39093802   | 0.001280179 |
| MCM3       | -0.264505999 | 0.792014302 | 2.939934797  | 0.004718555 | 3.215869613  | 0.002157327 |
| MCM3AP     | 1.700021681  | 0.092691701 | 1.956794927  | 0.055225155 | 2.249074355  | 0.028442138 |
| MCM3AP-AS1 | 1.270958312  | 0.207123987 | -1.510400928 | 0.136408225 | -0.312135272 | 0.756092126 |
| MCM4       | 0.852538514  | 0.396251114 | 0.854416799  | 0.396414014 | 2.554976906  | 0.013352071 |
| MCM5       | -0.417538586 | 0.677310923 | 1.805640284  | 0.076201267 | 1.819480505  | 0.074162705 |
| MCM6       | 2.182861137  | 0.031733624 | 2.088891264  | 0.04114698  | 3.404826888  | 0.001227474 |
| MCM7       | 0.102315324  | 0.91874134  | 0.862183952  | 0.392161915 | 1.838360983  | 0.07129242  |
| MCM8       | 2.759270373  | 0.007059076 | 1.232075313  | 0.22292717  | 1.769398389  | 0.082249313 |
| MCM9       | 0.687711973  | 0.493459646 | -1.36123984  | 0.178739858 | -2.541554548 | 0.013819467 |
| MCMBP      | -0.767837722 | 0.44465815  | 0.539716539  | 0.591473133 | -1.000639656 | 0.321287289 |
| MCOLN1     | -2.245203668 | 0.027284637 | 0.094458237  | 0.925073002 | -0.740352124 | 0.462166249 |
| MCOLN2     | 3.835129799  | 0.000236679 | 0.059810625  | 0.952513509 | 0.878806111  | 0.383245965 |
| MCOLN3     | 1.114178043  | 0.26826479  | 1.957033072  | 0.055196458 | 2.298372843  | 0.025280308 |
| MCPH1      | 0.308538325  | 0.758408726 | 1.997686507  | 0.050481116 | 2.456930794  | 0.017123472 |
| MCRS1      | -0.237975089 | 0.81245878  | 1.022010837  | 0.311049345 | 1.229581701  | 0.223973318 |
| MCTP1      | -0.268641835 | 0.788839941 | 0.419034383  | 0.676749651 | -1.187809789 | 0.239900937 |
| MCTP2      | 0.184742129  | 0.853860343 | -0.633376451 | 0.528994938 | -0.787890052 | 0.434069488 |
| MCTS1      | 1.331636207  | 0.186450704 | -1.069087199 | 0.289490498 | -0.102064682 | 0.919068393 |
| MCU        | -1.42338278  | 0.158193832 | -2.724208349 | 0.008519191 | -2.80444135  | 0.006907278 |
| MDC1       | 2.27015031   | 0.025663818 | -0.730343825 | 0.468140416 | -0.1780905   | 0.859291877 |
| MDFIC      | 1.980241236  | 0.050829618 | -0.093454017 | 0.92586721  | -1.039831136 | 0.302868423 |
| MDGA1      | 1.612558505  | 0.110454472 | 1.288648008  | 0.202672731 | 0.481595025  | 0.631962486 |
| MDH1       | 2.253140555  | 0.026759479 | 2.023073245  | 0.047715681 | 2.516440496  | 0.014734021 |
| MDH2       | -0.752855619 | 0.453564639 | 2.235904304  | 0.029248114 | 2.916431596  | 0.005078221 |
| MDK        | -1.894930076 | 0.061415681 | -0.715829157 | 0.476989006 | 0.730618512  | 0.46804523  |
| MDM1       | 0.584050627  | 0.560694313 | -0.727963659 | 0.469585014 | -1.713416558 | 0.092144068 |
| MDM2       | -0.216441325 | 0.829149366 | -1.489375389 | 0.141844266 | -0.872073556 | 0.386876355 |
| MDM4       | 1.805013943  | 0.074524548 | -0.2831885   | 0.778047707 | 1.243762004  | 0.218746825 |
| MDN1       | 2.020223294  | 0.046429611 | 0.630159231  | 0.531082623 | 0.9442971    | 0.349057309 |
| MDP1       | 0.366550499  | 0.714842362 | 0.037295587  | 0.97037829  | -0.89906178  | 0.372453301 |
| MDS2       | 1.999488152  | 0.048669016 | 1.64078143   | 0.106293175 | 3.335407922  | 0.001513104 |
| ME1        | 0.838676237  | 0.403944483 | 1.744711894  | 0.086369016 | 1.64411007   | 0.105732992 |
| ME2        | -0.780708396 | 0.437088548 | 0.21032434   | 0.834156821 | -0.101492895 | 0.919520202 |
| ME3        | 0.980316684  | 0.329642203 | -0.379155256 | 0.705966812 | 0.285579136  | 0.776249725 |
| MEA1       | -0.918741291 | 0.360765601 | -1.690278888 | 0.096380472 | -0.827680581 | 0.411350009 |
| MEAF6      | -0.724704122 | 0.470573933 | -0.277365794 | 0.782492351 | 0.578680618  | 0.565115232 |
| MCEP2      | 0.29238986   | 0.770683215 | -0.237585182 | 0.813045959 | 0.133906634  | 0.893954467 |
| MECR       | 0.517254281  | 0.606288446 | 0.963389957  | 0.339379317 | 2.395418216  | 0.019954956 |
| MED1       | -0.615098247 | 0.540091954 | -0.541631943 | 0.59016124  | -0.455155656 | 0.65074965  |
| MED10      | 1.059188907  | 0.292439294 | 0.889464821  | 0.377453349 | 1.285765047  | 0.203794322 |
| MED11      | 0.653455786  | 0.5151821   | -0.100724464 | 0.920118995 | 0.177714197  | 0.859586017 |
| MED12      | -0.772344408 | 0.441999023 | -0.321758046 | 0.74880085  | -0.012885035 | 0.989765117 |
| MED12L     | -2.721483164 | 0.007846089 | -1.960907783 | 0.054731345 | -2.899373411 | 0.005324248 |
| MED13      | -0.161573162 | 0.872015817 | -0.962873522 | 0.339636224 | -2.560030474 | 0.013179845 |
| MED13L     | -0.356951442 | 0.72199063  | -0.534035267 | 0.595372398 | -2.113106436 | 0.039042448 |
| MED14      | 0.98839109   | 0.32569617  | -2.205857648 | 0.03139806  | -2.444380932 | 0.017669918 |
| MED15      | -0.966627946 | 0.336403683 | 0.135641966  | 0.892577284 | 0.859959182  | 0.393462821 |
| MED16      | -0.180293938 | 0.85734021  | 0.836269661  | 0.406459347 | 1.007623352  | 0.317951255 |
| MED17      | 0.937667683  | 0.351005399 | -0.529007273 | 0.598833303 | -0.89835924  | 0.372824363 |
| MED18      | -3.119687178 | 0.002454399 | 2.892241817  | 0.005389289 | 3.189094189  | 0.002333424 |
| MED19      | -0.026557014 | 0.978873749 | -2.427607086 | 0.018346195 | -2.516108944 | 0.014746452 |
| MED20      | 0.564872034  | 0.573611329 | 0.377656897  | 0.707073631 | -0.711723466 | 0.479578142 |
| MED21      | 0.549335167  | 0.584179713 | -1.958818985 | 0.054981662 | -2.320109186 | 0.02398832  |
| MED22      | -0.219800755 | 0.82654013  | 0.823853785  | 0.413421159 | 1.677867808  | 0.098922699 |
| MED23      | 0.807509118  | 0.421570765 | -0.643867753 | 0.522216926 | -1.68647846  | 0.097244343 |
| MED24      | 0.363325792  | 0.717240951 | 1.718237778  | 0.091125117 | 2.160723563  | 0.034991339 |
| MED25      | -2.677147011 | 0.008870954 | -1.105777285 | 0.273420421 | -1.832336973 | 0.072197887 |
| MED26      | 0.726357032  | 0.469565434 | -0.847534955 | 0.400205221 | -0.917584847 | 0.362754841 |
| MED27      | 0.105960637  | 0.915856992 | 1.896141762  | 0.062961295 | 2.709460071  | 0.008916018 |
| MED28      | -0.735220168 | 0.464178503 | -1.962506051 | 0.054540471 | -2.398520509 | 0.019802672 |
| MED29      | -1.195162971 | 0.23526413  | -0.72382569  | 0.472102488 | 0.27936657   | 0.780988411 |
| MED30      | -0.551210401 | 0.582899273 | -2.144939955 | 0.036187647 | -1.884325501 | 0.064693451 |
| MED31      | -0.262826339 | 0.79330449  | -2.539978935 | 0.013806709 | -2.334492599 | 0.023166033 |
| MED4       | -0.350826909 | 0.72656446  | -1.246178313 | 0.217743864 | -0.658939353 | 0.51262383  |
| MED6       | -1.476349704 | 0.143452709 | 0.979847782  | 0.331259194 | 2.001308074  | 0.050193339 |
| MED7       | 0.683890384  | 0.495858012 | -0.867165145 | 0.389449977 | -0.924749116 | 0.359047644 |
| MED8       | -1.31655511  | 0.191438125 | 2.208559847  | 0.031199168 | 1.260582049  | 0.212664697 |
| MED9       | -1.384167461 | 0.169839964 | -1.481480626 | 0.143928984 | -0.283410307 | 0.777903056 |
| MEF2A      | 1.319933189  | 0.190312382 | -0.672863175 | 0.503725131 | -1.695638619 | 0.095484613 |



|             |              |             |              |             |              |             |
|-------------|--------------|-------------|--------------|-------------|--------------|-------------|
| MEF2BNB     | -2.281821084 | 0.024935078 | -0.718496022 | 0.475356188 | -0.388466439 | 0.699137684 |
| MEF2BNB-MEF | -1.429404995 | 0.156461181 | -0.253900295 | 0.800476791 | -0.277725084 | 0.782241872 |
| MEF2C       | 0.414556641  | 0.679484693 | -0.250290482 | 0.803253355 | -0.699623335 | 0.487046515 |
| MEF2D       | -1.605028886 | 0.112103672 | -1.405131419 | 0.165353042 | -1.303339805 | 0.197769647 |
| MEFV        | -2.740545924 | 0.007439577 | 1.131380276  | 0.262583824 | 0.027846567  | 0.97788311  |
| MEG3        | 2.048178652  | 0.043550524 | 1.278497918  | 0.206201801 | 0.627672976  | 0.53275871  |
| MEGF11      | 0.448866636  | 0.654641534 | -0.670264119 | 0.505368085 | -0.900827535 | 0.371521718 |
| MEGF6       | 2.152288695  | 0.034137908 | 0.334881439  | 0.738931077 | 0.599362073  | 0.551338597 |
| MEGF8       | 1.732706377  | 0.086683635 | -0.240197995 | 0.811029627 | 0.470119797  | 0.640087503 |
| MEGF9       | -2.737690884 | 0.007499211 | -0.652919277 | 0.516406119 | -1.265688463 | 0.210843261 |
| MEI1        | 1.356104013  | 0.178567766 | 0.772975388  | 0.442697648 | 1.172331626  | 0.246006286 |
| MEIS1       | -5.149295771 | 1.60E-06    | 0.549906872  | 0.584509467 | 0.172111395  | 0.863967835 |
| MELK        | 2.201649954  | 0.030330465 | -0.976705021 | 0.33279976  | 0.551250614  | 0.583645546 |
| MEMO1       | -0.409881155 | 0.682898475 | -3.566669542 | 0.000735894 | -3.392519157 | 0.001274073 |
| MEN1        | 0.496904628  | 0.620506954 | -2.152980321 | 0.035520889 | -1.171677028 | 0.246266935 |
| MEOX1       | -1.5441072   | 0.126184353 | 2.689500211  | 0.009345056 | 1.703392108  | 0.094015651 |
| MEPCE       | -1.070096312 | 0.28752943  | -0.164775005 | 0.869698014 | 0.631690352  | 0.530148776 |
| MERTK       | 0.03392556   | 0.973014057 | 1.053814817  | 0.29636851  | 0.240740541  | 0.810631723 |
| MESDC1      | 0.358941542  | 0.720506578 | -3.524763483 | 0.000838309 | -4.00226684  | 0.000185508 |
| MESDC2      | -0.441573515 | 0.65989106  | 1.247593406  | 0.21722872  | 2.538970297  | 0.101391142 |
| MEST        | -1.343327774 | 0.182651916 | -0.767350971 | 0.446007169 | -1.090341098 | 0.280212816 |
| METAP1      | 2.745726373  | 0.007332474 | 1.16018      | 0.25076208  | 1.114387555  | 0.269852983 |
| METAP1D     | -0.09613468  | 0.923634231 | -2.171313964 | 0.034040636 | -0.981008149 | 0.330790365 |
| METAP2      | 0.902655111  | 0.369195973 | 1.654045594  | 0.1035587   | 2.272848913  | 0.026876071 |
| METRN       | 1.75152185   | 0.083372555 | -2.049017433 | 0.045025518 | -2.179657512 | 0.033485847 |
| METRNL      | -1.037839413 | 0.302214531 | -1.022766839 | 0.310694754 | -2.766811995 | 0.007647161 |
| METTL1      | -0.377948923 | 0.706387109 | -0.049461345 | 0.960722765 | 1.178911094  | 0.243397484 |
| METTL10     | 0.551679256  | 0.58257934  | -0.49368593  | 0.623405386 | -0.879671844 | 0.382780696 |
| METTL11A    | -0.045543651 | 0.963778133 | 0.311141614  | 0.756816306 | 0.84251836   | 0.403066854 |
| METTL12     | 1.257669355  | 0.21186945  | -2.162264542 | 0.034764384 | -1.107465971 | 0.27280695  |
| METTL13     | -0.616896757 | 0.53891042  | 3.613655209  | 0.000635261 | 3.207684778  | 0.002209784 |
| METTL14     | 0.836798836  | 0.404993364 | -0.743440419 | 0.460237021 | -0.894174615 | 0.375039431 |
| METTL15     | 0.145335051  | 0.8847818   | -0.481200986 | 0.632196772 | -0.34485954  | 0.731486427 |
| METTL16     | 1.373365786  | 0.173160007 | 2.149365065  | 0.035819347 | 2.412523273  | 0.019128193 |
| METTL17     | 2.223790258  | 0.028746868 | 0.11124123   | 0.911811805 | 1.623420928  | 0.110092352 |
| METTL18     | 0.463001959  | 0.644516544 | -0.551752129 | 0.583252689 | 0.188622065  | 0.851068078 |
| METTL19     | 1.187151715  | 0.238392154 | 2.175976883  | 0.033672894 | 1.62917446   | 0.108865645 |
| METTL20     | -0.551220512 | 0.582892373 | 0.833330575  | 0.408100828 | 0.129732576  | 0.897240924 |
| METTL21A    | -0.910846607 | 0.364887549 | -2.210737458 | 0.031039696 | -1.725100592 | 0.090001531 |
| METTL21B    | 0.137678604  | 0.890811886 | -3.027941961 | 0.003680031 | -1.531522383 | 0.131246801 |
| METTL21D    | -0.10017802  | 0.920432987 | -0.386076181 | 0.700862721 | -0.726088624 | 0.470795667 |
| METTL22     | 0.306202179  | 0.760180692 | -1.015766888 | 0.313988448 | -0.9780351   | 0.332245659 |
| METTL23     | 1.819666271  | 0.072241844 | -1.71825229  | 0.091122452 | -0.627656513 | 0.532769419 |
| METTL2A     | -0.654489853 | 0.514519061 | 1.90913953   | 0.061230173 | 2.4049979    | 0.019488065 |
| METTL2B     | 0.159150117  | 0.873918686 | 1.352242144  | 0.18158365  | 1.810603724  | 0.075545349 |
| METTL3      | 5.045717919  | 2.44E-06    | 1.051475813  | 0.297431724 | 1.477902329  | 0.145013026 |
| METTL4      | 0.298179779  | 0.766275379 | -1.042910092 | 0.301347662 | -1.428812035 | 0.158589371 |
| METTL5      | 0.733279712  | 0.465354893 | -0.678789439 | 0.499989778 | 0.886069478  | 0.379353458 |
| METTL6      | 1.124995006  | 0.263678614 | -0.098014418 | 0.922261148 | 0.165948649  | 0.868792535 |
| METTL7A     | 1.204406061  | 0.231691982 | 2.586093928  | 0.012258606 | 2.470627768  | 0.016544492 |
| METTL8      | 0.864819013  | 0.389511333 | 0.781090485  | 0.437948047 | 0.801896467  | 0.425988424 |
| METTL9      | -0.345476026 | 0.730568663 | 0.305574217  | 0.761030537 | 0.121473328  | 0.90374915  |
| MEX3B       | 1.390885129  | 0.167799815 | -2.454301852 | 0.017160485 | -3.019999839 | 0.003797247 |
| MEX3C       | 1.632214005  | 0.106241117 | -2.180662164 | 0.033306904 | -2.856583082 | 0.00599085  |
| MEX3D       | -1.464355968 | 0.146693125 | -3.094923448 | 0.003037074 | -3.580963954 | 0.000714599 |
| MFAP1       | -0.511688897 | 0.610162304 | 1.711456406  | 0.092377575 | 1.919700101  | 0.059974027 |
| MFAP3       | -0.217861983 | 0.82804578  | -1.346283218 | 0.183485896 | -2.621451879 | 0.011242005 |
| MFAP3L      | -6.124016741 | 2.55E-08    | 2.650563453  | 0.010358328 | 0.618803531  | 0.538544395 |
| MFAP4       | 0.592550302  | 0.55501585  | -0.055834747 | 0.955666692 | 0.664344684  | 0.509184648 |
| MFF         | 0.893738486  | 0.37392221  | 0.890641986  | 0.376826626 | 1.28677903   | 0.203443038 |
| MFG8        | 2.44413282   | 0.016534026 | -0.922930747 | 0.359893533 | 0.526041285  | 0.600927955 |
| MFHAS1      | 2.045020207  | 0.04386793  | 0.788243604  | 0.43378652  | 0.502803439  | 0.61706596  |
| MFI2        | 0.392500171  | 0.695646579 | -1.773782752 | 0.081385307 | -0.132443364 | 0.895106367 |
| MFI2-AS1    | 1.401548615  | 0.164599845 | -1.431040224 | 0.157822315 | -0.655383068 | 0.514893307 |
| MFN1        | 0.933223999  | 0.353281545 | -0.427109125 | 0.670892288 | -1.057568763 | 0.294773867 |
| MFN2        | -3.228355384 | 0.001755425 | 2.3809532    | 0.020596155 | 2.33424557   | 0.02317994  |
| MFNG        | -0.605198659 | 0.54661902  | 0.355872698  | 0.723236068 | 1.057603052  | 0.294758365 |
| MFS1        | -1.321110659 | 0.189921158 | 2.373836025  | 0.020960296 | 0.682483528  | 0.497734964 |
| MFS10       | -0.792311171 | 0.430329772 | -0.703003122 | 0.484885743 | -0.888549808 | 0.378029965 |
| MFS11       | -1.047276524 | 0.29786663  | 1.842126274  | 0.070606515 | 1.85779109   | 0.068436773 |
| MFS2A       | -0.173764002 | 0.862453741 | 0.94683234   | 0.347679791 | -0.171965992 | 0.864081609 |
| MFS2B       | -2.271366658 | 0.025587002 | 1.282269421  | 0.204885182 | -0.551477561 | 0.583491047 |

|            |              |             |              |             |              |             |
|------------|--------------|-------------|--------------|-------------|--------------|-------------|
| MFSD3      | 0.195349195  | 0.845574113 | -1.807042064 | 0.075979658 | -1.783194416 | 0.079951587 |
| MFSD4      | 1.352415928  | 0.179739567 | -0.356825297 | 0.722526584 | -0.173178137 | 0.863133227 |
| MFSD5      | -2.590130541 | 0.01124322  | 0.801507304  | 0.426132366 | 0.764136344  | 0.447980352 |
| MFSD6      | 1.504166095  | 0.136152505 | -0.171145487 | 0.864709216 | -0.539284848 | 0.591819116 |
| MFSD6L     | 1.37775296   | 0.17179877  | -0.883098059 | 0.380854428 | -0.906984041 | 0.368285268 |
| MFSD7      | -0.536162115 | 0.593211798 | -1.880347828 | 0.065120534 | -2.554757309 | 0.013359601 |
| MFSD8      | 2.513793417  | 0.013781043 | -2.2226394   | 0.030180708 | -1.740693966 | 0.087206433 |
| MFSD9      | -0.319073863 | 0.75043368  | -1.451917147 | 0.151950385 | -2.482639989 | 0.016051322 |
| MGA        | 1.747199668  | 0.08412379  | 0.872010806  | 0.386823091 | 0.52971715   | 0.598393203 |
| MGAM       | -3.231095488 | 0.001740483 | -0.384166817 | 0.70226948  | -1.038445528 | 0.303507076 |
| MGAT1      | -1.963132589 | 0.052818278 | 1.561187991  | 0.123957692 | 1.503444327  | 0.138319907 |
| MGAT2      | 1.145922485  | 0.254962642 | -1.253841781 | 0.214964845 | -2.059465488 | 0.044090425 |
| MGAT3      | -0.622572458 | 0.535190422 | 0.55608933   | 0.580303785 | -0.870827763 | 0.387550477 |
| MGAT4A     | 2.125569665  | 0.036367308 | -0.150429556 | 0.880951304 | -0.004638563 | 0.996315391 |
| MGAT4B     | -1.029365219 | 0.306155225 | 1.041615336  | 0.301942629 | 0.727228339  | 0.470102798 |
| MGAT5      | 0.164216955  | 0.86994045  | 0.630964332  | 0.530559783 | -0.377199861 | 0.707444803 |
| MGC12916   | 0.220510921  | 0.8259888   | -1.104381818 | 0.27401995  | -1.109442427 | 0.271961138 |
| MGC12982   | 2.553820051  | 0.012392455 | -1.692435558 | 0.095966418 | -0.612215397 | 0.542862794 |
| MGC16142   | -0.190297442 | 0.849518431 | -1.968948295 | 0.053776871 | 0.138599311  | 0.890261907 |
| MGC16275   | -0.036787467 | 0.970738564 | -2.16399303  | 0.034625111 | -2.06563584  | 0.043482305 |
| MGC16703   | 1.113540446  | 0.268536848 | -0.463578196 | 0.644697132 | 0.250039182  | 0.803468206 |
| MGC23270   | 1.202950715  | 0.232251812 | 0.532575773  | 0.596376043 | -0.292722362 | 0.770811732 |
| MGC23284   | -0.847124324 | 0.399245144 | 0.089510621  | 0.928986649 | 0.625167474  | 0.534389813 |
| MGC2752    | -1.485742546 | 0.140954209 | -0.578300763 | 0.565315495 | -2.346590928 | 0.022493939 |
| MGC3771    | -0.406070512 | 0.685685689 | 1.07515684   | 0.286787869 | 2.320466572  | 0.023967578 |
| MGC39372   | -0.362925617 | 0.717538806 | 1.247811809  | 0.217149294 | 0.443550093  | 0.659069741 |
| MGC57346   | 1.147663325  | 0.254246899 | -1.019130013 | 0.312403062 | 0.582030569  | 0.562872221 |
| MGC72080   | 0.842114373  | 0.402027932 | -2.477952752 | 0.016168095 | -1.414206471 | 0.162813903 |
| MGEA5      | 0.140383968  | 0.888680435 | 0.570484148  | 0.57056834  | 0.504292826  | 0.616025791 |
| MGLL       | -2.839910624 | 0.005615229 | 1.006264231  | 0.318497335 | 0.019231962  | 0.984724133 |
| MGMT       | -0.211256645 | 0.833180012 | 0.565646723  | 0.573831049 | 2.067532848  | 0.043296813 |
| MGP        | 2.382432035  | 0.019372226 | 2.014497267  | 0.048634906 | 2.160489892  | 0.035010284 |
| MGRN1      | -2.05399245  | 0.042971428 | 0.048427341  | 0.961543207 | 0.069971807  | 0.944464325 |
| MGST1      | 1.692157495  | 0.094186951 | 1.743901943  | 0.086511413 | 1.864342924  | 0.067495874 |
| MGST2      | -1.469504697 | 0.145295153 | -0.490542944 | 0.625613435 | -0.468720306 | 0.641081475 |
| MGST3      | 1.629705126  | 0.106771595 | -1.470360954 | 0.146906083 | -0.32571568  | 0.74584835  |
| MIA3       | -0.955362446 | 0.342035828 | 1.375105916  | 0.174424121 | 0.923926209  | 0.359472215 |
| MIAT       | 3.749484093  | 0.000318152 | -2.395227329 | 0.019882852 | -2.304878214 | 0.024887297 |
| MIB1       | 0.007270578  | 0.994215579 | -0.320257911 | 0.749931793 | -1.593682448 | 0.116612725 |
| MIB2       | 0.143693673  | 0.886073962 | -2.532409332 | 0.01407712  | -2.201498253 | 0.031820152 |
| MICA       | 0.626402327  | 0.532687691 | 2.82699393   | 0.006450501 | -0.308768366 | 0.758638708 |
| MICAL1     | -0.153537061 | 0.878329571 | 1.133606175  | 0.261656282 | 2.010244925  | 0.049210654 |
| MICAL2     | -2.316714206 | 0.022863892 | -0.107934764 | 0.914422561 | -0.520485479 | 0.604768473 |
| MICAL3     | 1.046549398  | 0.298200115 | 0.161689127  | 0.872116529 | 0.3587015    | 0.721161561 |
| MICALCL    | -3.167737861 | 0.002118281 | 0.487707069  | 0.627608691 | 0.229583064  | 0.819248749 |
| MICALL1    | -0.566953607 | 0.572202447 | 1.016634356  | 0.313579003 | 1.438941544  | 0.155709885 |
| MICALL2    | -0.397033031 | 0.692313321 | 1.386948145  | 0.170801897 | 0.176951829  | 0.860181989 |
| MICB       | -1.886154013 | 0.062603208 | -1.823045629 | 0.073487658 | -2.301946675 | 0.025063724 |
| MICU1      | -1.330523878 | 0.18681519  | 1.847470738  | 0.069816763 | 1.919818089  | 0.05995879  |
| MID1IP1    | -1.826395825 | 0.071213123 | -2.586629318 | 0.012241598 | -3.281739147 | 0.001775876 |
| MID2       | 0.449315073  | 0.654319315 | 1.000835556  | 0.321092609 | 2.00073      | 0.050257481 |
| MIDN       | -1.389838956 | 0.1681163   | -1.41681366  | 0.161923768 | -1.940172977 | 0.057379008 |
| MIER1      | 0.054239495  | 0.956868445 | -0.530678736 | 0.597681751 | -1.173967322 | 0.245355849 |
| MIER2      | 0.281521251  | 0.778977703 | -0.065880099 | 0.947701427 | -0.336905056 | 0.737442577 |
| MIER3      | 0.849233538  | 0.398077112 | -0.061103391 | 0.951488405 | -0.789243503 | 0.43328466  |
| MIF4GD     | 0.366565878  | 0.714830929 | 0.247395397  | 0.805482014 | 0.71841992   | 0.475472728 |
| MHIP       | -1.721155091 | 0.088769374 | 0.818545593  | 0.416419542 | 0.671485691  | 0.504660224 |
| MILR1      | -0.997238699 | 0.321408291 | 0.396078868  | 0.693510347 | 0.891952502  | 0.376219061 |
| MINA       | 0.600659835  | 0.549624821 | -0.016881595 | 0.986589419 | 1.25222595   | 0.900793904 |
| MINK1      | -0.081530571 | 0.935206883 | 0.765756921  | 0.446947763 | 0.837625013  | 0.405787147 |
| MINPP1     | -0.414941236 | 0.679204179 | -1.345020493 | 0.183890929 | -1.456569194 | 0.15079627  |
| MIOS       | 1.388625602  | 0.168483931 | 2.142716354  | 0.036373964 | 3.565178289  | 0.000750534 |
| MIPPEP     | 0.364559908  | 0.716322658 | 1.913499844  | 0.060658573 | 2.557816809  | 0.013255037 |
| MIR155HG   | 1.631857364  | 0.106316395 | -0.55346466  | 0.582087467 | -1.360010671 | 0.179253913 |
| MIR17HG    | 0.183344208  | 0.854953644 | -0.008338361 | 0.993375842 | -0.120180043 | 0.904768862 |
| MIR210HG   | -0.124955489 | 0.900846444 | 0.566002381  | 0.573590859 | 0.957058459  | 0.342634139 |
| MIR223     | -0.882011174 | 0.380195937 | 2.251353204  | 0.028194122 | 1.509835482  | 0.13668396  |
| MIR3648    | -0.728957467 | 0.467981279 | 0.60269804   | 0.549075339 | -0.956788243 | 0.342769337 |
| MIR497HG   | 0.585399806  | 0.559791045 | -0.855004631 | 0.396091212 | -0.48952017  | 0.626377547 |
| MIRLET7BHG | -0.818092    | 0.415534857 | -0.484429743 | 0.629918025 | -0.363255148 | 0.717776213 |
| MIS12      | 1.712989605  | 0.090268441 | -0.380751361 | 0.70478849  | -0.453346008 | 0.652044093 |
| MIS18A     | 1.434719518  | 0.154944334 | -1.320980506 | 0.191732177 | -0.546410563 | 0.58694518  |

|          |              |             |              |             |              |              |
|----------|--------------|-------------|--------------|-------------|--------------|--------------|
| MIS18BP1 | -0.020718169 | 0.983517815 | 0.232109814  | 0.817275462 | -1.31503675  | 0.193834701  |
| MITD1    | -0.652134623 | 0.516029878 | -2.017116083 | 0.048352601 | -1.416385254 | 0.162178234  |
| MITF     | 0.737806489  | 0.462613182 | -1.410275747 | 0.163836095 | -0.8399247   | 0.404507313  |
| MKI67    | 0.431891075  | 0.666886763 | 1.546690188  | 0.127415389 | 2.06528401   | 0.043516783  |
| MKI67IP  | 0.991971224  | 0.323956567 | -0.641325933 | 0.523854881 | -0.457944199 | 0.648757117  |
| MKKS     | 1.412737663  | 0.161292643 | -0.586276893 | 0.559980158 | -0.232136157 | 0.817274951  |
| MKL1     | -2.032778918 | 0.045116953 | 0.786982805  | 0.434518317 | 0.729281266  | 0.468856221  |
| MKL2     | 1.988398707  | 0.049904102 | -1.248064716 | 0.217057347 | -1.155023363 | 0.252965077  |
| MKLN1    | 0.501728852  | 0.617122874 | -0.348370499 | 0.728832107 | -1.668973673 | 0.100681163  |
| MKNK1    | 0.097982055  | 0.922171445 | -0.008832748 | 0.992983101 | 0.402584184  | 0.688780417  |
| MKNK2    | -1.77212344  | 0.079867405 | -1.368497937 | 0.176470755 | -2.047726749 | 0.04526771   |
| MKRN1    | -3.312772199 | 0.001346078 | 1.585853314  | 0.118248111 | 1.056542519  | 0.295238097  |
| MKRN2    | -0.842692254 | 0.401706344 | -1.589025216 | 0.11752948  | -1.149068973 | 0.255391296  |
| MKRN3    | 0.752162298  | 0.453979265 | -1.217462469 | 0.228392857 | 0.006086106  | 0.995165559  |
| MKS1     | 0.278825632  | 0.781038903 | 0.859565295  | 0.393592306 | 2.299356234  | 0.025220546  |
| MLANA    | 1.207595217  | 0.230468616 | -1.966098974 | 0.054113464 | -0.090687904 | 0.928062826  |
| MLC1     | 0.059825539  | 0.952431498 | 0.405595224  | 0.686542816 | 0.482185506  | 0.631545618  |
| MLEC     | 1.224973305  | 0.223884391 | 2.13703561   | 0.036853771 | 2.078067234  | 0.042279189  |
| MLF1     | -0.284046562 | 0.777048162 | 0.778943524  | 0.439201685 | 2.057564514  | 0.044279255  |
| MLF1IP   | 1.511770806  | 0.134208348 | -0.459698768 | 0.64746299  | -0.008285568 | 0.993418471  |
| MLF2     | -3.453995432 | 0.000854847 | -0.477112114 | 0.635087709 | -0.696532083 | 0.488644775  |
| MLH1     | 0.736354139  | 0.46349182  | 2.270732206  | 0.026919581 | 3.605256109  | 0.000662486  |
| MLH3     | 1.591095677  | 0.115207499 | -0.511075845 | 0.611251541 | 0.253242051  | 0.801004655  |
| MLKL     | -1.936530729 | 0.056041615 | 0.611849247  | 0.543045274 | -0.766877381 | 0.446361961  |
| MLL      | 1.335132361  | 0.185308571 | 0.256285909  | 0.798643263 | 0.501374714  | 0.618064506  |
| MLL2     | -0.026569629 | 0.978863717 | -1.655495088 | 0.103263388 | -1.48725961  | 0.142532023  |
| MLL3     | 0.271082467  | 0.78696836  | -0.311980792 | 0.756181732 | -1.847390099 | 0.069953168  |
| MLL4     | -0.39809253  | 0.691535085 | -1.164409285 | 0.249058648 | -0.825171472 | 0.412760901  |
| MLL5     | -0.921316016 | 0.359427746 | -1.8047846   | 0.076336809 | -2.484622996 | 0.015971196  |
| MLLT1    | -0.385793373 | 0.700589428 | -0.690051142 | 0.492933235 | -0.315394059 | 0.753629908  |
| MLLT10   | -0.04286506  | 0.965907115 | -2.030327801 | 0.046949832 | -2.958878676 | 0.004511075  |
| MLLT11   | 1.58279242   | 0.117089627 | -1.283213873 | 0.204556461 | 0.340216603  | 0.734960968  |
| MLLT3    | 0.808748324  | 0.420861295 | 0.084863589  | 0.932664135 | 1.032724344  | 0.306153806  |
| MLLT4    | -0.590854122 | 0.556146748 | -1.432453201 | 0.157419408 | 0.147893666  | 0.882955682  |
| MLLT6    | 0.633979595  | 0.527753933 | -0.180106414 | 0.857701212 | 0.699174466  | 0.487324799  |
| MLST8    | -0.16888917  | 0.866275015 | 0.096403948  | 0.923534417 | -0.021300175 | 0.983081601  |
| MLX      | -0.343168336 | 0.732297883 | -2.962945629 | 0.004423452 | -2.792624932 | 0.007132187  |
| MLXIP    | 1.19658516   | 0.234711934 | -0.009900548 | 0.992134848 | 0.235870693  | 0.814389924  |
| MLYCD    | 1.055703341  | 0.294020296 | -0.611064881 | 0.543560792 | -0.078680831 | 0.937565793  |
| MMAA     | 0.417337787  | 0.677457215 | -1.423843042 | 0.159887024 | 0.508897628  | 0.612814868  |
| MMAB     | 0.435268546  | 0.664443103 | -1.560778685 | 0.124054269 | -0.194783893 | 0.846264122  |
| MMACHC   | -0.526519111 | 0.59986449  | 1.102651433  | 0.274764649 | 1.198999213  | 0.23555609   |
| MMADHC   | -1.985564453 | 0.050224023 | -0.048786338 | 0.961258353 | 0.047616645  | 0.962190468  |
| MMD      | -4.830410382 | 5.78E-06    | 0.897261745  | 0.373314544 | -1.524982344 | 0.132868029  |
| MME      | -3.895963119 | 0.000191353 | -0.396087959 | 0.693503679 | -0.467304071 | 0.642088014  |
| MMGT1    | -0.736714247 | 0.463273875 | 0.243924859  | 0.8081558   | 0.511548571  | 0.610969819  |
| MMP11    | -0.039382151 | 0.968675747 | -0.343877275 | 0.73219083  | 0.222150569  | 0.825001471  |
| MMP14    | 0.506384764  | 0.613864684 | 0.585192915  | 0.560703772 | 1.22941198   | 0.224036424  |
| MMP15    | 0.803265531  | 0.4240057   | 0.44457386   | 0.65829385  | -0.121171989 | 0.903986731  |
| MMP17    | 1.632636587  | 0.106151976 | 1.376209542  | 0.174084083 | 0.633731036  | 0.528825581  |
| MMP19    | -1.458802095 | 0.148212811 | 1.541258253  | 0.128730559 | 0.899768538  | 0.372080249  |
| MMP23B   | 0.769383057  | 0.443745295 | -3.43335089  | 0.001110728 | -2.351308796 | 0.022236602  |
| MMP24    | -0.304376868 | 0.761566082 | 2.638915585  | 0.010680388 | 3.276831924  | 0.001801941  |
| MMP25    | -0.766156267 | 0.445652649 | -1.044060431 | 0.30081973  | -1.108733139 | 0.272264461  |
| MMP28    | 2.696508576  | 0.008409289 | 0.309681437  | 0.757920872 | 0.719883235  | 0.474578252  |
| MMP8     | -3.716195937 | 0.000356522 | 1.360499604  | 0.178972525 | -0.19190391  | 0.848508729  |
| MMP9     | -3.531707416 | 0.000662445 | 1.022735216  | 0.31070958  | 1.23017968   | 0.223751083  |
| MMRN1    | -0.605278951 | 0.546565921 | -0.712904042 | 0.478783557 | -0.93052958  | 0.356074394  |
| MMS19    | 2.587628167  | 0.011319219 | 1.573644162  | 0.121047297 | 3.402930175  | 0.001234548  |
| MMS22L   | 0.161575462  | 0.872014011 | -1.499284411 | 0.139261426 | -0.093199514 | 0.926076304  |
| MN1      | 0.184226967  | 0.854263213 | 1.2403484    | 0.219875663 | 0.962352682  | 0.339992313  |
| MNAT1    | 0.054399603  | 0.956741252 | 0.25986601   | 0.795893819 | 1.285333257  | 0.203944049  |
| MNDA     | -3.094884484 | 0.002646723 | -0.670419036 | 0.505270075 | -0.988849484 | 0.326972411  |
| MNT      | -1.143276582 | 0.256053228 | -0.261860506 | 0.794363212 | -0.050840479 | 0.959632786  |
| MOAP1    | 2.083147224  | 0.040166249 | -1.233612773 | 0.222357741 | -0.259356942 | 0.796306924  |
| MOB2     | -2.50659886  | 0.014046404 | -1.247421195 | 0.217291363 | -1.125649603 | 0.265094898  |
| MOBKL1A  | 0.808891212  | 0.420779535 | -0.17754796  | 0.859700935 | -0.840026392 | 0.4044450776 |
| MOBKL1B  | -0.996210715 | 0.321904557 | 0.182442853  | 0.855875837 | -1.571286759 | 0.121172594  |
| MOBKL2A  | -3.20611745  | 0.001881203 | 0.939018     | 0.351642832 | 0.964269252  | 0.339039256  |
| MOBKL2B  | 0.955305417  | 0.342064494 | 0.129076008  | 0.897747192 | -0.429443925 | 0.66924108   |
| MOBKL2C  | 0.123610929  | 0.901907853 | 2.327932815  | 0.023450277 | 1.666067136  | 0.101261331  |
| MOCS1    | -1.457711723 | 0.148512597 | 0.342333806  | 0.733345805 | 1.597485567  | 0.115761879  |

|           |              |             |              |             |              |             |
|-----------|--------------|-------------|--------------|-------------|--------------|-------------|
| MOCS2     | 0.725201177  | 0.470270534 | 0.200261248  | 0.841981698 | 0.633444872  | 0.529011027 |
| MOCS3     | -2.137570659 | 0.035350804 | -1.564917373 | 0.123080499 | -2.621240636 | 0.0112482   |
| MOGS      | 0.454341831  | 0.650711901 | -0.777060141 | 0.440303156 | 0.13913485   | 0.889840658 |
| MON1A     | 0.724386834  | 0.47076766  | -0.139876221 | 0.889245782 | 0.33292999   | 0.740425128 |
| MON1B     | -0.967969005 | 0.33573729  | 0.252521614  | 0.80153693  | -0.00157093  | 0.998752139 |
| MON2      | 1.616183394  | 0.109667499 | -1.815835158 | 0.07460182  | -2.718152501 | 0.008712038 |
| MORC2     | 1.614558108  | 0.110019794 | 2.783152342  | 0.007268557 | 3.593285308  | 0.000687696 |
| MORC2-AS1 | -0.148502431 | 0.882289189 | 2.291458428  | 0.025613172 | 4.209389102  | 9.32E-05    |
| MORC3     | 0.632850401  | 0.528487675 | -0.435377084 | 0.664915959 | -1.473664401 | 0.146147796 |
| MORC4     | 2.59258743   | 0.011169051 | 3.083425843  | 0.003139389 | 4.704517261  | 1.70E-05    |
| MORF4L1   | -1.086499887 | 0.280252581 | 0.386455495  | 0.70058338  | 0.298767543  | 0.766218666 |
| MORF4L2   | -0.178426814 | 0.858801725 | -0.444895359 | 0.658062849 | -0.808935868 | 0.421961269 |
| MORN1     | 1.054081897  | 0.294757743 | -3.23203574  | 0.002034784 | -2.928963589 | 0.004904244 |
| MORN2     | -1.068105863 | 0.288421166 | -0.867488371 | 0.389274406 | 0.625787018  | 0.533986243 |
| MORN3     | 1.806423348  | 0.074302401 | -0.261602847 | 0.794560898 | 1.231771508  | 0.223160279 |
| MORN4     | 1.014068921  | 0.313355715 | -1.190498297 | 0.238734202 | -0.250343329 | 0.803234179 |
| MOSC1     | -3.724351952 | 0.000346733 | 1.437553565  | 0.155971705 | 1.299882243  | 0.198944216 |
| MOSC2     | -0.665282821 | 0.507625696 | 1.199580655  | 0.235213689 | 0.610350967  | 0.544088101 |
| MOSPD1    | 0.028735042  | 0.97714158  | -1.831044205 | 0.072268091 | -2.28233777  | 0.026272682 |
| MOSPD2    | -0.985908024 | 0.326906326 | -1.287667658 | 0.203011605 | -1.230946765 | 0.223466237 |
| MOSPD3    | -1.08747415  | 0.279824425 | -2.524531276 | 0.014363635 | -2.192472663 | 0.032499443 |
| MOV10     | -0.465757499 | 0.642550491 | 1.63488359   | 0.107527773 | 0.849739963  | 0.3990728   |
| MOXD1     | 0.874816415  | 0.384077276 | 1.993859694  | 0.050909711 | 2.609313202  | 0.01160304  |
| MPDU1     | -1.525939067 | 0.130644522 | 1.214529835  | 0.229501462 | 1.327567805  | 0.189684952 |
| MPEG1     | -1.566303068 | 0.120900089 | 0.353412391  | 0.725069605 | -0.072431138 | 0.942515801 |
| MPG       | 0.461134388  | 0.64585048  | -0.419665557 | 0.676291072 | -0.968742562 | 0.336821658 |
| MPHOSPH10 | 2.422109438  | 0.017501384 | 1.362859732  | 0.178231509 | 2.388685565  | 0.020289063 |
| MPHOSPH6  | 0.248440085  | 0.804378156 | -0.30316084  | 0.762859609 | 0.861838552  | 0.39243648  |
| MPHOSPH8  | 0.837943284  | 0.404353778 | 2.087164772  | 0.041308701 | 2.510807827  | 0.014946516 |
| MPHOSPH9  | 2.444599877  | 0.016514038 | -1.05412237  | 0.296228904 | -1.159946763 | 0.250971441 |
| MPI       | 1.156293818  | 0.250719492 | 1.569456209  | 0.122019633 | 3.141520206  | 0.002680084 |
| MPL       | -1.063941983 | 0.290292743 | 0.716078927  | 0.476835948 | 0.494701459  | 0.622738065 |
| MPND      | -0.325173558 | 0.745828724 | 1.181943809  | 0.24208485  | 0.668319158  | 0.506663798 |
| MPO       | -2.936652009 | 0.004242573 | 3.398079041  | 0.001236795 | 1.749770226  | 0.085612902 |
| MPP1      | -3.081353026 | 0.002757467 | 1.062341459  | 0.292514767 | 0.718809962  | 0.475234215 |
| MPP2      | 1.303256542  | 0.195918313 | 0.956543697  | 0.342795464 | 1.986902685  | 0.051812886 |
| MPP5      | 0.65005185   | 0.517367868 | -1.972901795 | 0.053312811 | -1.723259719 | 0.09033634  |
| MPP6      | 0.706720304  | 0.481624766 | 0.835138203  | 0.407090787 | 1.357218733  | 0.180133993 |
| MPP7      | -0.640158935 | 0.523748018 | -0.303481164 | 0.762616761 | -1.100883463 | 0.275637211 |
| MPPE1     | -0.850268243 | 0.397504884 | -0.858278191 | 0.39429655  | -1.39048386  | 0.169860503 |
| MPPED2    | -1.688949838 | 0.094802459 | -0.487697295 | 0.627615572 | 0.646105439  | 0.52083905  |
| MRP1P     | 3.220688886  | 0.001797871 | -0.021460251 | 0.982952685 | 0.371739668  | 0.711483712 |
| MPST      | -0.37250025  | 0.710424366 | 0.936362362  | 0.352996298 | -0.197612521 | 0.844060785 |
| MPV17     | -0.407670794 | 0.684514664 | -2.172879733 | 0.03391676  | -2.65624028  | 0.010263326 |
| MPV17L2   | 0.521530803  | 0.603319342 | -0.559019731 | 0.578315444 | -0.547777812 | 0.58601218  |
| MPZ       | -1.470072717 | 0.145141563 | -3.048706989 | 0.003468249 | -3.510649114 | 0.000888383 |
| MPZL1     | -4.218923938 | 5.99E-05    | -0.193082042 | 0.847573973 | -1.127266645 | 0.26441662  |
| MPZL2     | -1.364784834 | 0.175832474 | -2.036933405 | 0.046261745 | -2.308965603 | 0.024643152 |
| MPZL3     | -1.622457004 | 0.108316141 | -2.273749491 | 0.026725797 | -3.288764823 | 0.001739177 |
| MR1       | -1.06865013  | 0.288177142 | -0.07776725  | 0.938282732 | -0.902225802 | 0.370785069 |
| MRAS      | 0.641317104  | 0.522998974 | 0.528206624  | 0.599385275 | -0.050072658 | 0.960241912 |
| MRC2      | -1.49111215  | 0.139541256 | 1.245271186  | 0.218074563 | 0.59815724   | 0.552136506 |
| MRE11A    | 2.436197681  | 0.016876924 | -0.453429149 | 0.65194351  | -1.308233268 | 0.196116205 |
| MREG      | 0.190670404  | 0.849227096 | -0.591267522 | 0.55665465  | -0.567055889 | 0.572932795 |
| MRFAP1    | -2.06027856  | 0.042352747 | 3.074661132  | 0.003219541 | 2.946457452  | 0.004670626 |
| MRFAP1L1  | 0.040428184  | 0.967844193 | -0.287723498 | 0.774591155 | -0.1084276   | 0.914042453 |
| MRGPRE    | 0.06185056   | 0.950823404 | 1.514131067  | 0.135461277 | 2.84903421   | 0.006116173 |
| MRGPRX3   | 0.426351473  | 0.670902547 | 3.319633045  | 0.00156745  | 2.743409864  | 0.008143392 |
| MRI1      | 2.374049839  | 0.019789492 | -0.37474772  | 0.709224418 | 0.207439681  | 0.836415846 |
| MRM1      | 1.893373897  | 0.06162486  | 1.804015162  | 0.076458862 | 2.523378059  | 0.014476056 |
| MRP63     | 1.255062504  | 0.212809657 | -1.840144887 | 0.07090121  | -0.715358604 | 0.477347077 |
| MRPL1     | 1.180356927  | 0.241068519 | -0.107994296 | 0.914375546 | 0.223667754  | 0.82382638  |
| MRPL10    | -2.021618862 | 0.04628211  | -2.993801873 | 0.004054627 | -2.883273529 | 0.005566549 |
| MRPL11    | 1.567654768  | 0.12058406  | 1.271387224  | 0.208701255 | 1.813761035  | 0.075051112 |
| MRPL12    | 0.987053785  | 0.326347555 | 0.588453557  | 0.558528522 | 1.181901573  | 0.242218361 |
| MRPL13    | 1.298378309  | 0.197581202 | -0.024695106 | 0.980383519 | 0.252763228  | 0.801372823 |
| MRPL14    | -0.10766714  | 0.91450711  | -1.641951524 | 0.106049615 | -1.742027118 | 0.086970841 |
| MRPL15    | 1.355534648  | 0.17874829  | -0.390184354 | 0.697839521 | 0.244937515  | 0.807396388 |
| MRPL16    | -0.577124701 | 0.565342449 | 1.675022966  | 0.099351469 | 2.498449933  | 0.015422466 |
| MRPL17    | 2.184561691  | 0.031604336 | 0.595240872  | 0.554014088 | 0.736832067  | 0.464287421 |
| MRPL18    | 1.091346947  | 0.27812693  | -0.14266507  | 0.887052615 | -0.56431186  | 0.574785799 |
| MRPL19    | 1.534917258  | 0.128425118 | -0.903219361 | 0.3701716   | 0.369252024  | 0.713326593 |

|          |              |             |              |             |              |             |
|----------|--------------|-------------|--------------|-------------|--------------|-------------|
| MRPL2    | -1.488324646 | 0.140273367 | -0.444294701 | 0.658494457 | 0.886737431  | 0.378996754 |
| MRPL20   | 0.720440769  | 0.473180762 | -0.387541511 | 0.699783825 | 0.32916398   | 0.743254523 |
| MRPL21   | -1.251285848 | 0.214177206 | 0.190987795  | 0.849206794 | 0.871334832  | 0.387276004 |
| MRPL22   | 1.480919128  | 0.142232957 | -1.955019852 | 0.055439453 | -0.644715839 | 0.521732719 |
| MRPL23   | -0.516320345 | 0.606937743 | -1.436010831 | 0.156408502 | -0.879773944 | 0.382725848 |
| MRPL24   | 0.665027916  | 0.507787931 | 0.750979517  | 0.455722363 | 1.872047439  | 0.066403446 |
| MRPL27   | -0.34420425  | 0.731521471 | 0.255056481  | 0.799588032 | 1.377756134  | 0.173736735 |
| MRPL28   | -1.607313726 | 0.111601153 | 1.530647936  | 0.131330715 | 1.371811731  | 0.175570194 |
| MRPL3    | 1.541379223  | 0.126846254 | -0.404917992 | 0.687037767 | 0.375241176  | 0.708892679 |
| MRPL30   | 0.510441917  | 0.611031811 | -0.342506375 | 0.733216642 | 0.472023006  | 0.638736834 |
| MRPL32   | 1.257272259  | 0.212012472 | -1.586837321 | 0.118024795 | -1.373167901 | 0.175150605 |
| MRPL33   | 0.123301928  | 0.902151807 | -2.89905592  | 0.005288329 | -2.117314202 | 0.038668673 |
| MRPL34   | 1.47323065   | 0.144289979 | -2.12080724  | 0.038255045 | -2.031483835 | 0.046941535 |
| MRPL35   | 1.409422984  | 0.162267014 | -0.948191806 | 0.346993326 | -1.149751238 | 0.255112456 |
| MRPL36   | -0.030758666 | 0.975532305 | -3.265979521 | 0.001839947 | -2.507930919 | 0.015056115 |
| MRPL37   | -0.372411605 | 0.710490118 | 0.486605623  | 0.628384397 | 1.702181588  | 0.09424376  |
| MRPL38   | 0.915449932  | 0.362480451 | 2.003151784  | 0.049874398 | 2.47453672   | 0.016382528 |
| MRPL39   | 0.999392554  | 0.320370155 | -1.20225695  | 0.23418353  | -1.219750623 | 0.227650241 |
| MRPL4    | 0.770840308  | 0.442885473 | -0.810264218 | 0.421123569 | -0.43524059  | 0.665053677 |
| MRPL40   | 1.108903196  | 0.270521325 | -0.30296266  | 0.763009868 | 1.023245934  | 0.310573181 |
| MRPL41   | 0.37915801   | 0.705492355 | -1.953166735 | 0.055663932 | -1.178967335 | 0.243375271 |
| MRPL42   | 1.276916172  | 0.205022103 | -1.454723298 | 0.151174299 | -1.407995802 | 0.164636484 |
| MRPL42PS | 1.859712126  | 0.066298517 | -1.17715491  | 0.24397534  | 1.046760677  | 0.299688239 |
| MRPL43   | 0.106157937  | 0.915700911 | -1.702739444 | 0.094008322 | -0.855803606 | 0.39573814  |
| MRPL44   | -2.567630766 | 0.011943418 | 2.726045021  | 0.008477412 | 1.91597668   | 0.060456572 |
| MRPL45   | 0.90927709   | 0.365710574 | -0.501133783 | 0.618186908 | 0.859427812  | 0.39375331  |
| MRPL45P2 | 0.771912717  | 0.442253337 | -0.085872973 | 0.931865219 | -1.557571858 | 0.124945093 |
| MRPL46   | 0.111924834  | 0.911140279 | -0.889507007 | 0.377430877 | 0.397371795  | 0.692597562 |
| MRPL47   | 1.282963966  | 0.202904668 | -0.155562107 | 0.876922114 | -0.020065217 | 0.984062371 |
| MRPL48   | 0.772818617  | 0.44171976  | -0.155714624 | 0.876802433 | 0.714664746  | 0.477772481 |
| MRPL49   | -0.48744305  | 0.627167763 | -0.282047742 | 0.7789179   | 0.665266122  | 0.508599616 |
| MRPL50   | 1.044980819  | 0.298920382 | -2.261225603 | 0.027538302 | -1.894617855 | 0.063288897 |
| MRPL51   | -1.626286806 | 0.107497799 | -0.759283639 | 0.450779307 | -0.004194551 | 0.996668087 |
| MRPL52   | 0.85919925   | 0.392586724 | -1.48816394  | 0.14216261  | -0.25790401  | 0.797422452 |
| MRPL53   | -0.327761666 | 0.743877612 | 1.24111991   | 0.219592669 | 1.607161839  | 0.113619653 |
| MRPL54   | -1.126661782 | 0.262976855 | -1.39562165  | 0.168185789 | 0.220995782  | 0.825896147 |
| MRPL55   | 0.777014619  | 0.439253205 | 1.708268056  | 0.092971319 | 2.350682075  | 0.022270635 |
| MRPL9    | 0.024114381  | 0.980816477 | -0.421122011 | 0.675233357 | 1.258665738  | 0.21335124  |
| MRPS10   | 0.294614579  | 0.768988647 | -0.978604422 | 0.331868116 | -0.059567613 | 0.95271119  |
| MRPS11   | -1.360997709 | 0.177021848 | -0.046046113 | 0.963432778 | -0.020068669 | 0.984059629 |
| MRPS12   | -0.707777484 | 0.480971192 | 0.026454389  | 0.97898636  | 0.792448143  | 0.431429741 |
| MRPS14   | 0.438446887  | 0.662146826 | -1.627459378 | 0.109098426 | -0.975812392 | 0.33336435  |
| MRPS15   | 0.017534209  | 0.986050505 | 1.322831848  | 0.191119484 | 2.655092208  | 0.01029434  |
| MRPS16   | -1.396112702 | 0.1662252   | 3.097787276  | 0.003012079 | 4.668166246  | 1.93E-05    |
| MRPS17   | 1.842179544  | 0.068848177 | -0.239489973 | 0.811575887 | 1.469372281  | 0.147304177 |
| MRPS18A  | -1.479051369 | 0.14273055  | -0.543224386 | 0.589071597 | -0.359578198 | 0.720509354 |
| MRPS18B  | -0.366885627 | 0.714593252 | 1.087127588  | 0.281509025 | 1.035156473  | 0.305026742 |
| MRPS18C  | 0.157068232  | 0.875554228 | -1.422907934 | 0.160156817 | -1.561595071 | 0.123993779 |
| MRPS2    | -0.610219176 | 0.543303895 | -0.98632261  | 0.328100207 | -0.396209666 | 0.693449712 |
| MRPS21   | 2.129031796  | 0.036071491 | -1.227218157 | 0.224733149 | -0.529751028 | 0.598369865 |
| MRPS22   | 1.188303695  | 0.23794053  | -0.594340499 | 0.554611896 | 0.085112557  | 0.932474195 |
| MRPS23   | 1.611405104  | 0.110705828 | 0.174316516  | 0.862227994 | 0.724735329  | 0.471619128 |
| MRPS24   | 0.925262697  | 0.357383171 | -4.5550026   | 2.77E-05    | -4.33388677  | 6.12E-05    |
| MRPS25   | 3.206551387  | 0.00187867  | 0.357777585  | 0.721817575 | 0.900389295  | 0.371752787 |
| MRPS26   | 0.977113442  | 0.331216347 | -2.176297621 | 0.033647727 | -1.341927026 | 0.185012836 |
| MRPS27   | 1.632908923  | 0.10609456  | 3.087222836  | 0.003105249 | 4.863630653  | 9.67E-06    |
| MRPS28   | 1.845863891  | 0.068305687 | -0.328918234 | 0.743410497 | 0.235493694  | 0.814681049 |
| MRPS30   | 0.88371489   | 0.379280441 | -0.134882192 | 0.89317528  | 0.350044516  | 0.727612926 |
| MRPS31   | -0.901716495 | 0.369691698 | -0.391085738 | 0.697176849 | -1.068263408 | 0.289965939 |
| MRPS33   | 0.150391094  | 0.880803444 | -1.451267504 | 0.152130498 | -0.587137313 | 0.559461433 |
| MRPS34   | 0.179469772  | 0.857985275 | -1.937626408 | 0.05757718  | -1.33990353  | 0.185665887 |
| MRPS35   | 0.180513752  | 0.85716818  | 0.070833285  | 0.943775818 | 1.140676206  | 0.258839208 |
| MRPS36   | -1.30522972  | 0.195248668 | -4.681874573 | 1.77E-05    | -3.659885267 | 0.000558226 |
| MRPS5    | 0.381578205  | 0.703702597 | 1.278337984  | 0.206257773 | 2.128942596  | 0.037651919 |
| MRPS6    | -1.177443955 | 0.242222463 | 0.391763997  | 0.696678369 | 0.241837534  | 0.809785758 |
| MRPS7    | 0.050887518  | 0.959531553 | -0.177102972 | 0.860048838 | -0.013913296 | 0.988948397 |
| MRPS9    | 0.535631972  | 0.593576648 | 1.437276965  | 0.156049949 | 3.29206619   | 0.001722181 |
| MRRF     | 2.212522924  | 0.029543485 | -0.14470603  | 0.885448153 | 0.655428632  | 0.514864196 |
| MRS2     | 2.716737029  | 0.007950399 | 0.182607904  | 0.855746918 | 0.749979434  | 0.456393326 |
| MRS2P2   | -0.767977546 | 0.444575509 | 2.597134367  | 0.011912193 | 1.215988088  | 0.229069093 |
| MRT04    | 0.411314338  | 0.681851338 | 2.330468516  | 0.023306141 | 2.964203839  | 0.004444238 |
| MRVI1    | -3.825255678 | 0.000244941 | -0.07361263  | 0.941573677 | -0.431415608 | 0.667815579 |

|              |              |             |              |             |              |             |
|--------------|--------------|-------------|--------------|-------------|--------------|-------------|
| MS4A1        | 0.667149046  | 0.506438776 | -0.223984609 | 0.823561899 | 0.083042551  | 0.934112591 |
| MS4A14       | 0.174600889  | 0.861798051 | 0.298872572  | 0.76611299  | 0.610009491  | 0.544312673 |
| MS4A2        | -2.410977378 | 0.0180093   | 1.643359496  | 0.105757142 | -2.833752407 | 0.006377329 |
| MS4A3        | -2.469067358 | 0.015496691 | 1.432402008  | 0.157433992 | -2.073166043 | 0.042750032 |
| MS4A4A       | 0.31948145   | 0.750125688 | 0.35715704   | 0.722279563 | -0.617140928 | 0.539632529 |
| MS4A6A       | -0.900582206 | 0.370291327 | -0.300091555 | 0.76518775  | -0.917176494 | 0.362966884 |
| MS4A7        | 1.487653808  | 0.140450004 | -1.685973365 | 0.097211465 | -2.606943397 | 0.011674745 |
| MSC          | -1.460204828 | 0.147827837 | -2.32710864  | 0.023497296 | -2.767808986 | 0.007626652 |
| MSH2         | 1.884671354  | 0.062805728 | 0.262409205  | 0.793942274 | 0.150088377  | 0.881231903 |
| MSH3         | 0.617549903  | 0.538481662 | 0.699846094  | 0.486840552 | -0.523964678 | 0.602362111 |
| MSH5-C6orf26 | 0.354565104  | 0.723771567 | 0.296912179  | 0.767601696 | 1.69642669   | 0.09533445  |
| MSH6         | 2.224532988  | 0.028695023 | 3.508505613  | 0.000881583 | 2.584350572  | 0.012378888 |
| MSI2         | -0.327821624 | 0.743832431 | -2.872447262 | 0.005692787 | -3.070992201 | 0.003283867 |
| MSL1         | -1.385949647 | 0.169296881 | -0.266598346 | 0.790730586 | -0.669063906 | 0.506192185 |
| MSL2         | 0.393575992  | 0.694854925 | 0.105315086  | 0.916491708 | -0.194645646 | 0.846371839 |
| MSL3         | 1.191085131  | 0.236852625 | 0.804672369  | 0.424317903 | 1.129525017  | 0.263471388 |
| MSL3P1       | -0.396032895 | 0.693048257 | 1.839425694  | 0.071008432 | 0.135924453  | 0.892366398 |
| MSLN         | 0.567439438  | 0.57187386  | 1.093489994  | 0.278731043 | 1.437576435  | 0.156095549 |
| MSMP         | 0.682433149  | 0.496774213 | 1.012841812  | 0.315371746 | 0.732018889  | 0.467196809 |
| MSN          | -1.853767326 | 0.067154023 | 0.507043804  | 0.614059943 | 0.429088708  | 0.669498028 |
| MSR1         | -0.490102003 | 0.625292743 | -0.931880348 | 0.355288248 | -1.724868934 | 0.090043608 |
| MSRA         | -1.489048769 | 0.140082895 | 1.086168016  | 0.281929665 | 0.777795789  | 0.439949424 |
| MSRB2        | -4.334317208 | 3.90E-05    | 0.49186183   | 0.624686454 | 0.548124419  | 0.58577577  |
| MSRB3        | -3.278835227 | 0.001498511 | 1.176646701  | 0.244176586 | -0.53441987  | 0.59515765  |
| MST1         | 0.264109622  | 0.792318716 | 0.395390016  | 0.694015742 | 0.322995075  | 0.747896893 |
| MST1P2       | 3.127490106  | 0.002396636 | 0.117861295  | 0.906587627 | -0.936207603 | 0.353169401 |
| MST1P9       | 1.080102012  | 0.283075485 | -0.053158296 | 0.957789733 | 0.187008826  | 0.852326756 |
| MST1R        | 2.0349519    | 0.044893034 | -0.568330341 | 0.572019902 | -0.230460917 | 0.818569946 |
| MST4         | 1.206002876  | 0.231078856 | -0.691505044 | 0.492026233 | -1.173993127 | 0.245345597 |
| MSTO1        | 1.414214161  | 0.160860067 | -0.102463544 | 0.918744654 | 1.83300032   | 0.072097708 |
| MSTO2P       | 1.747887963  | 0.084003786 | -0.610380949 | 0.544010505 | 0.764325205  | 0.447868733 |
| MSX2P1       | 1.101459035  | 0.273728344 | -2.181114615 | 0.033271747 | -1.51634471  | 0.135033587 |
| MT1E         | -2.266552095 | 0.025892243 | 0.450717111  | 0.653885655 | 1.308838212  | 0.195912526 |
| MT1F         | 0.3565728    | 0.722273111 | -0.564400461 | 0.574673086 | 1.212249995  | 0.230485118 |
| MT1L         | -2.773266911 | 0.006786354 | 0.386368929  | 0.700647127 | 1.484104     | 0.14336494  |
| MT1X         | -1.840435333 | 0.069106252 | 0.265207036  | 0.791796861 | 1.740655076  | 0.087213313 |
| MT2A         | -3.838856669 | 0.00023363  | 0.151237344  | 0.880316956 | -0.825671442 | 0.412479529 |
| MTA1         | 2.63788301   | 0.009878574 | -3.692644694 | 0.000495017 | -3.099326888 | 0.003027419 |
| MTA2         | 0.44567238   | 0.656938614 | 1.017798372  | 0.313030153 | 1.771067597  | 0.081968415 |
| MTA3         | 0.337046334  | 0.736891961 | 0.098017703  | 0.922258551 | 0.507298567  | 0.613929031 |
| MTAP         | 2.013531012  | 0.047142539 | 0.448834127  | 0.655235516 | 1.210742695  | 0.231057902 |
| MTBP         | 0.958417213  | 0.340502578 | -0.415400998 | 0.679391872 | -0.30352165  | 0.762612452 |
| MTCH1        | -1.276539115 | 0.205154656 | -0.643490429 | 0.522459904 | -0.056942512 | 0.954792829 |
| MTCH2        | 0.213778903  | 0.831218608 | 2.236913063  | 0.029178245 | 3.387569628  | 0.001293281 |
| MTCP1        | 1.227753795  | 0.22284374  | -0.193406016 | 0.84732144  | -0.27222733  | 0.786444246 |
| MTCP1NB      | 1.317022817  | 0.191281965 | 0.431275893  | 0.667877722 | 0.812597309  | 0.419875695 |
| MTDH         | 1.850180769  | 0.067674614 | 0.623997927  | 0.535092691 | -0.116548156 | 0.907633341 |
| MTERF        | 1.243731953  | 0.216931839 | -0.199231555 | 0.842783287 | -0.310733191 | 0.75715227  |
| MTERFD1      | 2.186422519  | 0.031463389 | 0.238738291  | 0.812155936 | 1.107588313  | 0.272754541 |
| MTERFD2      | 3.077591032  | 0.002789012 | 0.248995388  | 0.804250127 | 1.057033915  | 0.295015747 |
| MTERFD3      | 2.437185367  | 0.0168339   | -1.147005639 | 0.256121763 | 0.921334273  | 0.360811617 |
| MTF1         | -3.644727374 | 0.000454291 | 0.832433034  | 0.408602911 | 0.0686106    | 0.945542956 |
| MTF2         | 0.314470068  | 0.753915318 | -0.215903467 | 0.82982579  | -0.963498325 | 0.339422405 |
| MTFMT        | -2.592968659 | 0.011157582 | -0.876698808 | 0.384292259 | -0.063518225 | 0.949579083 |
| MTFP1        | -0.230984274 | 0.817868188 | 2.055901261  | 0.044334145 | 1.553194921  | 0.125986674 |
| MTFR1        | 0.333904097  | 0.739253693 | -0.398272875 | 0.691901588 | -1.204029274 | 0.233621659 |
| MTG1         | 1.036539888  | 0.302816601 | 1.653091876  | 0.103753381 | 2.595501951  | 0.012026646 |
| MTHFD1       | -0.18784122  | 0.851437597 | 1.165704229  | 0.248538746 | 2.027178231  | 0.047394092 |
| MTHFD1L      | 1.194104954  | 0.235675535 | 4.388526986  | 4.93E-05    | 3.780178471  | 0.00038114  |
| MTHFD2       | 0.330955921  | 0.741471846 | 0.156643859  | 0.876073323 | -0.747464513 | 0.457897345 |
| MTHFD2L      | 0.100768298  | 0.919965753 | -1.493216973 | 0.140838489 | -1.729705092 | 0.089168577 |
| MTHFR        | 1.436415834  | 0.154462578 | 1.658035056  | 0.102747566 | 1.897970038  | 0.06283706  |
| MTHFS        | -1.72631607  | 0.08783246  | -2.937989826 | 0.004744318 | -2.785941521 | 0.007262365 |
| MTHFSD       | 1.488201417  | 0.140305801 | 1.971522304  | 0.053474343 | 1.97312739   | 0.053403381 |
| MTIF2        | 2.61394754   | 0.010542623 | 2.665051424  | 0.009970122 | 3.627452474  | 0.000618058 |
| MTIF3        | -0.129331236 | 0.897393445 | 0.35430502   | 0.724404188 | 1.319202843  | 0.19244754  |
| MTL5         | -0.253917189 | 0.800157371 | -1.775632832 | 0.081076416 | -1.410569361 | 0.163879343 |
| MTM1         | -0.530945107 | 0.596806737 | -0.000364916 | 0.9997101   | -0.923388606 | 0.359749762 |
| MTMR1        | 1.312613894  | 0.192757823 | 0.662118886  | 0.510535677 | 0.211211941  | 0.83348542  |
| MTMR10       | -0.683028263 | 0.496399939 | 0.169766975  | 0.865788283 | -0.836705743 | 0.406299438 |
| MTMR11       | -0.431451026 | 0.667205412 | -0.159252446 | 0.874027113 | -0.139034335 | 0.88991972  |
| MTMR12       | -1.106615903 | 0.271503913 | -0.365419409 | 0.716136923 | -0.516234245 | 0.607714803 |

|          |              |             |              |             |              |             |
|----------|--------------|-------------|--------------|-------------|--------------|-------------|
| MTMR14   | -2.047238661 | 0.043644781 | 1.235991898  | 0.221478692 | 1.311629176  | 0.194974896 |
| MTMR2    | 0.439230173  | 0.661581415 | -1.648992913 | 0.104593495 | -1.193863278 | 0.237543221 |
| MTMR3    | -2.003266075 | 0.048254255 | 1.004246945  | 0.319460084 | 0.626049201  | 0.533815506 |
| MTMR4    | 1.1106313    | 0.269780603 | 1.587119546  | 0.117960808 | 1.836065268  | 0.071636355 |
| MTMR6    | -1.103929428 | 0.272661156 | -0.056527508 | 0.955117226 | -1.381243806 | 0.172667874 |
| MTMR7    | 1.554466573  | 0.123695708 | 0.015550019  | 0.98764712  | 0.686210985  | 0.495399649 |
| MTMR8    | -0.06787621  | 0.946039594 | -0.128023971 | 0.898575965 | -0.817060693 | 0.417341761 |
| MTMR9    | 0.888737605  | 0.376589509 | -0.928446156 | 0.357050884 | -0.994136139 | 0.324414983 |
| MTMR9LP  | 0.841572128  | 0.402329831 | -1.02255321  | 0.310794925 | -0.35306827  | 0.72535728  |
| MTO1     | 0.611261007  | 0.542617236 | 1.313292988  | 0.194292192 | 1.460415835  | 0.149740339 |
| MTOR     | 1.481442747  | 0.142093702 | 0.538544834  | 0.592276331 | 0.5596566    | 0.577936071 |
| MTPAP    | 1.47426962   | 0.144010659 | -0.138912973 | 0.89000349  | 1.692344204  | 0.096114454 |
| MTR      | 1.78173382   | 0.078274462 | -0.076415548 | 0.939353323 | -0.07564427  | 0.939970573 |
| MTRF1    | 1.627441192  | 0.107252112 | -1.726184315 | 0.089675326 | -1.188034847 | 0.23981298  |
| MTRF1L   | 0.181471952  | 0.856418359 | -1.159421022 | 0.251068655 | -0.747281134 | 0.458007123 |
| MTRNR2L4 | 1.358515164  | 0.177804811 | -0.481382171 | 0.632068803 | 0.95010646   | 0.346123607 |
| MTRNR2L8 | -1.114838473 | 0.267983193 | -0.264615501 | 0.792250323 | -0.172384193 | 0.863754386 |
| MTRNR2L9 | -4.296704972 | 4.49E-05    | 0.813668017  | 0.419186264 | 1.125211152  | 0.265279021 |
| MTRR     | 0.959282091  | 0.340069293 | -0.920886845 | 0.360960079 | -1.86259764  | 0.067745438 |
| MTSS1    | 4.093999814  | 9.45E-05    | -1.33234305  | 0.187995088 | -1.419818486 | 0.161180479 |
| MTSS1L   | 1.385082773  | 0.169560877 | -1.629067017 | 0.108756747 | -0.256810006 | 0.798262684 |
| MTUS1    | 1.924120727  | 0.057601434 | 0.106745577  | 0.915361765 | 0.129094952  | 0.89774312  |
| MTVR2    | -0.743939816 | 0.458913104 | 0.667140455  | 0.507346488 | -0.159762139 | 0.87364089  |
| MTX1     | -3.301795312 | 0.001393714 | -1.860439935 | 0.067931192 | -1.51264909  | 0.135986837 |
| MTX2     | 0.770960047  | 0.442814865 | -0.823223621 | 0.413776425 | -0.964543625 | 0.338902962 |
| MTX3     | 1.695813159  | 0.093489456 | -0.469652573 | 0.640376506 | -0.170163453 | 0.865492289 |
| MUC1     | -0.043553469 | 0.965359934 | 1.180869147  | 0.242508166 | 1.128469875  | 0.263912714 |
| MUC12    | -0.079546384 | 0.936780332 | 1.448879654  | 0.152793958 | 0.262938577  | 0.793558857 |
| MUC16    | -0.615516473 | 0.539817083 | 3.436284066  | 0.001100812 | 2.45619556   | 0.017155061 |
| MUC20    | 1.622091794  | 0.108394439 | 2.079361551  | 0.042046535 | 1.820743187  | 0.073967766 |
| MUC4     | 0.980362963  | 0.329619496 | 0.633833275  | 0.528698849 | 0.095056074  | 0.924608188 |
| MUC5B    | 0.397803972  | 0.691747007 | 0.431272896  | 0.667879888 | -0.22470603  | 0.823022448 |
| MUC6     | 1.51186757   | 0.134183751 | 0.447020144  | 0.656537005 | 0.414017568  | 0.680436065 |
| MUDENG   | 0.274408954  | 0.784419485 | -0.564469824 | 0.574626205 | -0.574814885 | 0.567709064 |
| MUL1     | -2.107508803 | 0.037944832 | 2.54866471   | 0.01350223  | 2.789167602  | 0.007199257 |
| MUM1     | 1.719271268  | 0.089113393 | 0.624630737  | 0.534680108 | 1.636804045  | 0.107256092 |
| MUS81    | 1.967609091  | 0.052291655 | -2.305151662 | 0.024781235 | -1.936849539 | 0.057793634 |
| MUSTN1   | 0.1558233    | 0.876532513 | -0.537267463 | 0.593152547 | 1.028038709  | 0.308333139 |
| MUT      | 1.75428731   | 0.082894798 | 1.913541231  | 0.06065317  | 1.866303929  | 0.067216391 |
| MUTYH    | 1.516651875  | 0.132972046 | -1.051643993 | 0.297355189 | 0.048452125  | 0.961527586 |
| MVD      | -0.084040093 | 0.933217215 | -0.005350532 | 0.995749403 | 0.933721292  | 0.354439549 |
| MVK      | 1.7305288    | 0.087073718 | 2.089173972  | 0.041120552 | 2.73245041   | 0.008385811 |
| MVP      | -1.5568201   | 0.123135786 | 0.275648345  | 0.783804731 | -0.044949045 | 0.964307155 |
| MX1      | -1.773078065 | 0.079707984 | 1.494974793  | 0.140380149 | -1.091982232 | 0.279497067 |
| MX2      | -2.904797267 | 0.004656027 | -0.416628624 | 0.67849868  | -1.99306624  | 0.051114524 |
| MXD1     | -2.104026922 | 0.038255671 | -0.893201297 | 0.375466323 | -1.918296036 | 0.060155604 |
| MXD3     | 0.184147706  | 0.854325201 | 0.654467569  | 0.515415617 | -0.226350159 | 0.821749797 |
| MXD4     | -1.289234612 | 0.200726365 | -1.071082739 | 0.288600008 | -0.873905665 | 0.3858863   |
| MX11     | -3.77798428  | 0.000288641 | -0.830456929 | 0.409709649 | -0.904307653 | 0.369690014 |
| MXRA7    | -1.047760087 | 0.297644991 | -1.966156006 | 0.05410671  | 0.042993102  | 0.965859322 |
| MXRA8    | 2.463342364  | 0.015729571 | -1.945466518 | 0.056605043 | -2.005169849 | 0.049766649 |
| MYADM    | -3.870130567 | 0.000209483 | -0.359678115 | 0.720403305 | -0.171948821 | 0.864095046 |
| MYB      | 0.131142897  | 0.895964397 | 0.290703651  | 0.772322187 | -1.256944037 | 0.213969461 |
| MYBBP1A  | 1.602822735  | 0.112590607 | 0.890249655  | 0.37703543  | 0.886928322  | 0.378894852 |
| MYBL1    | 0.512928472  | 0.609298514 | -2.362463626 | 0.021554108 | -2.6056112   | 0.011715231 |
| MYBL2    | -0.285651949 | 0.775822244 | 1.199190913  | 0.235363983 | 1.092156608  | 0.279421092 |
| MYBPC2   | -1.569465349 | 0.120161776 | 0.508304209  | 0.613181417 | 0.420869793  | 0.675454255 |
| MYBPC3   | -0.422501265 | 0.673699303 | 0.375472167  | 0.708688604 | 0.213921914  | 0.83138168  |
| MYBPH    | 1.234274317  | 0.220417137 | -0.329917535 | 0.742659219 | 0.758293472  | 0.451441561 |
| MYC      | -0.874691136 | 0.384145078 | 0.859357753  | 0.393705811 | 0.273492547  | 0.785476567 |
| MYCBP    | 1.197997996  | 0.234164295 | -2.691679409 | 0.00929112  | -2.496572076 | 0.015495976 |
| MYCBP2   | 0.365661405  | 0.715503399 | 0.715235352  | 0.477352998 | -0.055747884 | 0.955740244 |
| MYCBPAP  | 2.896831069  | 0.004765069 | 0.444516109  | 0.658335349 | 1.21550796   | 0.229250613 |
| MYCL1    | -1.385872455 | 0.169320376 | -0.212551912 | 0.832426948 | -0.942115737 | 0.350163063 |
| MYCT1    | -0.451511074 | 0.652742355 | -0.841354648 | 0.403628946 | -1.116726736 | 0.268859788 |
| MYD88    | -0.43736503  | 0.662928081 | -1.155396719 | 0.252698683 | -2.081193094 | 0.041981255 |
| MYEF2    | 2.596757348  | 0.01104418  | -0.595140673 | 0.5540806   | -0.500557894 | 0.618635712 |
| MYEOV    | -2.955208747 | 0.004017608 | 1.0768963    | 0.286016573 | -0.369298873 | 0.713291871 |
| MYEOV2   | 0.082198042  | 0.934677639 | -0.475666046 | 0.636111487 | 0.366706471  | 0.715214155 |
| MYH10    | -0.857423998 | 0.393561326 | 0.416501381  | 0.678591238 | 0.159719459  | 0.873674355 |
| MYH11    | -0.282135431 | 0.778508292 | 0.222571479  | 0.824656431 | 0.545435645  | 0.587610888 |
| MYH3     | 1.759865417  | 0.081937999 | 2.514273834  | 0.014744592 | 3.329475071  | 0.001540234 |

|          |              |             |              |             |              |             |
|----------|--------------|-------------|--------------|-------------|--------------|-------------|
| MYH7     | -2.140099386 | 0.03513979  | -0.291133117 | 0.771995373 | -0.370892418 | 0.712111173 |
| MYH7B    | 2.445888388  | 0.016459009 | -1.295002963 | 0.200486288 | -0.786391621 | 0.43493937  |
| MYH9     | -2.103481199 | 0.038304589 | 1.594294885  | 0.116343356 | 1.5086201    | 0.136993876 |
| MYL12A   | -2.053561319 | 0.043014143 | -0.659670782 | 0.512094354 | 0.036724447  | 0.970834768 |
| MYL12B   | -0.719839012 | 0.473549357 | -1.150428236 | 0.254721568 | -0.519929751 | 0.605153249 |
| MYL4     | -3.060713135 | 0.002934706 | 1.276013889  | 0.207072405 | 0.606552692  | 0.546588698 |
| MYL5     | 0.634859431  | 0.527182588 | 0.345982945  | 0.730616164 | 0.878766015  | 0.383267522 |
| MYL6     | -0.2968102   | 0.767317344 | -0.772264488 | 0.443115159 | -0.253824526 | 0.80055685  |
| MYL6B    | -0.613445498 | 0.541178892 | 0.665332955  | 0.50849319  | 1.487576641  | 0.142448554 |
| MYL9     | -3.655430713 | 0.00043818  | 0.801807187  | 0.42596025  | -0.031583654 | 0.974915906 |
| MYLIP    | -1.365734638 | 0.175535134 | -0.452325405 | 0.652733632 | -1.582413392 | 0.11916352  |
| MYLK     | -4.611295442 | 1.36E-05    | 0.596239553  | 0.553351387 | -0.745414667 | 0.459125341 |
| MYLK3    | 0.173593656  | 0.862587217 | 0.756025681  | 0.452714895 | 0.387033639  | 0.700192096 |
| MYLK4    | 0.924000671  | 0.35803615  | 0.240712167  | 0.810632986 | -0.187470327 | 0.851966644 |
| MYNN     | -0.189636854 | 0.850034491 | -0.514058836 | 0.609177591 | -0.925678685 | 0.358568431 |
| MYO10    | -1.209074653 | 0.22990269  | 3.461773017  | 0.001018113 | 1.566911588  | 0.122745566 |
| MYO15A   | 1.673920381  | 0.097730219 | 0.266160775  | 0.79106589  | 0.381218802  | 0.704477373 |
| MYO15B   | 0.640737255  | 0.523373921 | 0.293495377  | 0.77019849  | 0.667358287  | 0.507272622 |
| MYO16    | 0.602955006  | 0.548103826 | -0.480534215 | 0.632667804 | 1.482882148  | 0.143688473 |
| MYO18A   | 1.522692098  | 0.131454584 | 1.299463852  | 0.19896209  | 1.754543016  | 0.084784678 |
| MYO19    | 1.57553708   | 0.118750416 | -2.412981278 | 0.019026582 | -1.300210324 | 0.198832539 |
| MYO1A    | -0.011918531 | 0.990517843 | 0.265548955  | 0.791534783 | 1.207628024  | 0.232244785 |
| MYO1B    | -1.046157013 | 0.298380181 | 0.14515449   | 0.88509567  | 1.034121222  | 0.305506138 |
| MYO1C    | 0.053160091  | 0.957725967 | 1.553952034  | 0.125673946 | 1.578141942  | 0.120142038 |
| MYO1D    | -0.269398567 | 0.788259513 | 1.960449879  | 0.054786136 | 2.559973555  | 0.013181773 |
| MYO1E    | 2.560664688  | 0.012168044 | 0.856046863  | 0.395519281 | 1.612383836  | 0.112476944 |
| MYO1F    | -2.10157491  | 0.03847589  | 0.319388732  | 0.750587316 | 0.312170046  | 0.756065839 |
| MYO1G    | -0.152983177 | 0.878765038 | -0.629718052 | 0.531369243 | 0.168653435  | 0.866674379 |
| MYO3B    | -1.450749338 | 0.150437951 | -1.512263767 | 0.135934664 | 0.425163021  | 0.67234033  |
| MYO5A    | -0.436196297 | 0.663772493 | -0.29293774  | 0.770622549 | -1.230111017 | 0.223776593 |
| MYO5B    | -0.012009755 | 0.990445271 | 0.475940802  | 0.635916912 | 0.645075253  | 0.521501498 |
| MYO5C    | -2.135339561 | 0.035537894 | -1.774618338 | 0.081245676 | -0.303882818 | 0.762338704 |
| MYO6     | 0.143409248  | 0.886297904 | -1.947472565 | 0.056358567 | -1.5193253   | 0.134283174 |
| MYO7A    | -0.761269881 | 0.448550016 | 3.255708919  | 0.001896963 | 2.754630864  | 0.007901875 |
| MYO7B    | -2.79965517  | 0.006298222 | 1.448061417  | 0.153021822 | 1.560949324  | 0.124146077 |
| MYO9A    | 0.455273987  | 0.650043857 | 0.244291874  | 0.807872933 | -0.952793651 | 0.344772058 |
| MYO9B    | -1.304377243 | 0.195537766 | 0.014348911  | 0.988601207 | 0.129231564  | 0.89763552  |
| MYOF     | 0.528230023  | 0.59868163  | 2.160508466  | 0.034906382 | 1.555139305  | 0.125523114 |
| MYOM1    | 0.227341698  | 0.820690287 | 0.213037224  | 0.832050178 | 0.092553622  | 0.926587119 |
| MYOM2    | 0.115594853  | 0.908239459 | 0.993230692  | 0.324752024 | 0.686309545  | 0.495337981 |
| MYPOP    | -0.045900408 | 0.963494598 | -4.281837829 | 7.10E-05    | -4.701280534 | 1.72E-05    |
| MYSM1    | 1.124642655  | 0.263827131 | -1.98486353  | 0.051929596 | -2.975552901 | 0.004304857 |
| MYT1L    | 0.557617858  | 0.57853424  | -1.059294464 | 0.293887918 | 0.480491699  | 0.632741736 |
| MZB1     | 0.277061091  | 0.782389004 | 0.310181603  | 0.757542459 | 0.477279758  | 0.635012624 |
| MZF1     | 1.926303084  | 0.057324501 | -1.365494772 | 0.17740695  | -1.053443501 | 0.296643017 |
| MZT1     | 0.459726331  | 0.646856969 | -1.293855211 | 0.200879863 | -1.56182643  | 0.123939249 |
| MZT2A    | 0.878134844  | 0.382284036 | -1.673720792 | 0.099608496 | -1.196159552 | 0.236653278 |
| MZT2B    | 0.660341474  | 0.510775554 | -0.269281909 | 0.788675091 | -0.003262508 | 0.997408446 |
| N4BP1    | -2.901356049 | 0.004702846 | -0.651482716 | 0.517326047 | -0.359473674 | 0.720587101 |
| N4BP2    | 1.403650768  | 0.16397457  | -0.449638936 | 0.654658428 | -1.780595659 | 0.080380269 |
| N4BP2L1  | 0.198244039  | 0.843315637 | -0.391394224 | 0.696950114 | -1.268875114 | 0.209712483 |
| N4BP2L2  | 0.364752488  | 0.716179399 | -0.846870806 | 0.400572281 | -1.285021468 | 0.204052215 |
| N4BP3    | 0.730051374  | 0.467315785 | 0.515810113  | 0.607961499 | 0.271566706  | 0.786949646 |
| N6AMT1   | 2.361754819  | 0.02041598  | -0.729207522 | 0.468829759 | -0.282541677 | 0.778565515 |
| N6AMT2   | 1.635635847  | 0.105521032 | -0.493918947 | 0.623241823 | 1.721975967  | 0.090570431 |
| NAA10    | -0.855999103 | 0.394344663 | -1.422207745 | 0.160359064 | 0.021055526  | 0.983275892 |
| NAA15    | 2.315307847  | 0.022944335 | 1.697643103  | 0.094972657 | 2.519593228  | 0.014616279 |
| NAA16    | 1.75195284   | 0.083297948 | -1.599430724 | 0.11519666  | -0.803326939 | 0.425168209 |
| NAA20    | 1.086676441  | 0.280174958 | -2.038913767 | 0.046057162 | -1.523136774 | 0.133328401 |
| NAA25    | 2.307595062  | 0.023389969 | 0.888509875  | 0.377962246 | 0.818706928  | 0.416409508 |
| NAA30    | 0.678800306  | 0.499062265 | -0.266075811 | 0.791131    | -0.702331495 | 0.485369416 |
| NAA35    | 0.55941684   | 0.577311512 | 0.990412795  | 0.326115027 | 0.740467788  | 0.462096645 |
| NAA38    | 0.931829081  | 0.353998004 | -1.256901199 | 0.213862759 | -1.72885785  | 0.089321363 |
| NAA40    | 3.100167385  | 0.002604621 | -0.696854219 | 0.488697126 | 0.1179526    | 0.906525504 |
| NAA50    | -0.29897311  | 0.765672015 | -0.24595045  | 0.806594955 | -1.001398036 | 0.320923887 |
| NAA60    | -2.128215083 | 0.036141085 | -0.693516756 | 0.490772763 | -0.262918117 | 0.793574548 |
| NAAA     | -0.600685276 | 0.54960795  | 1.218629564  | 0.227952757 | 0.800544305  | 0.426764608 |
| NAALAD2  | 0.240769756  | 0.810298829 | -1.785174517 | 0.079498797 | -1.585517124 | 0.118456538 |
| NAALADL1 | 0.651896162  | 0.516182975 | -1.273033882 | 0.208120449 | -0.6097127   | 0.544507896 |
| NAB1     | -0.085513454 | 0.932049262 | -1.076141123 | 0.28635125  | -2.367467618 | 0.02137502  |
| NAB2     | 3.139911957  | 0.002307287 | -1.905043076 | 0.061771346 | -1.330458834 | 0.188737178 |
| NACA     | 0.33433824   | 0.738927238 | 0.766775447  | 0.446346632 | 1.597861694  | 0.115678003 |



|         |              |             |              |             |              |             |
|---------|--------------|-------------|--------------|-------------|--------------|-------------|
| NACC1   | -1.44902488  | 0.150917805 | -1.330272238 | 0.188672028 | -0.832479831 | 0.408659553 |
| NACC2   | -1.781560263 | 0.078302994 | 0.119002585  | 0.905687398 | -1.144153596 | 0.257406631 |
| NADK    | -3.989990905 | 0.000137221 | 1.095150255  | 0.278009292 | 0.563977106  | 0.575012052 |
| NADKD1  | 0.81396794   | 0.417880801 | 0.958340164  | 0.341896888 | 0.862094465  | 0.392296852 |
| NADSYN1 | 0.229523311  | 0.818999788 | 2.013193204  | 0.048776012 | 2.931100605  | 0.004875134 |
| NAE1    | 0.338683314  | 0.735662592 | -0.08214986  | 0.934812367 | 1.244843746  | 0.218351847 |
| NAF1    | 2.700925149  | 0.008307089 | -1.394287434 | 0.168586195 | -0.498749037 | 0.619901498 |
| NAGA    | 0.608731632  | 0.544285081 | 1.709244368  | 0.092789175 | 1.202850823  | 0.23407382  |
| NAGK    | -2.063097152 | 0.042077839 | 1.11872848   | 0.26790014  | 0.042336305  | 0.966380562 |
| NAGLU   | 1.080621869  | 0.282845382 | -0.679706081 | 0.499413363 | -0.434758523 | 0.665401507 |
| NAGPA   | 0.085069441  | 0.932401221 | 2.878386768  | 0.005600098 | 2.039456396  | 0.046113399 |
| NAGS    | 0.504810738  | 0.614965318 | -2.173205444 | 0.033891041 | -0.736427002 | 0.464531868 |
| NAIF1   | -3.040292278 | 0.003120421 | 1.619975475  | 0.1107005   | 1.674755892  | 0.099535073 |
| NAIP    | -0.126854046 | 0.899348012 | 0.501668884  | 0.617812735 | 0.375236121  | 0.708896416 |
| NAMPT   | -1.261508765 | 0.210490265 | -0.443259811 | 0.65923836  | -1.623981828 | 0.109972272 |
| NANOS1  | -0.549405243 | 0.58413184  | 0.642289398  | 0.523233704 | 1.801902324  | 0.076921578 |
| NANP    | -0.790536572 | 0.431359485 | -1.171910789 | 0.246057715 | -1.998366362 | 0.05052048  |
| NANS    | -1.250559232 | 0.214441056 | 2.134533357  | 0.037066865 | 1.960976641  | 0.054840881 |
| NAP1L1  | 0.958437917  | 0.340492201 | 2.220586139  | 0.030327384 | 2.107159527  | 0.039576081 |
| NAP1L2  | 0.723362728  | 0.471393258 | 0.58913255   | 0.55807608  | 0.838387184  | 0.405362705 |
| NAP1L3  | 0.324162814  | 0.74659115  | 0.685234755  | 0.495944447 | 0.699259432  | 0.487272116 |
| NAP1L4  | 0.105398203  | 0.916301945 | 1.471963743  | 0.146474006 | 3.417363762  | 0.001181672 |
| NAP1L5  | 0.146067213  | 0.884205511 | -1.387458987 | 0.170646955 | -1.680676958 | 0.09837256  |
| NAPA    | -2.901324489 | 0.004703277 | 0.607971705  | 0.545596191 | -0.525357566 | 0.601399973 |
| NAPB    | 0.781377475  | 0.436697119 | -0.781574857 | 0.437665508 | -2.554049798 | 0.013383888 |
| NAPEPLD | 3.707523409  | 0.00036722  | -1.037041728 | 0.304050716 | 0.225568895  | 0.82235448  |
| NAPG    | 1.392802416  | 0.167220984 | -1.605572972 | 0.113837256 | -1.472399417 | 0.146487863 |
| NAPRT1  | 0.272587957  | 0.78581451  | 1.58511637   | 0.118415579 | 1.29529056   | 0.200512139 |
| NAPSA   | -1.160937825 | 0.248835865 | 0.639674636  | 0.524920426 | 0.840931802  | 0.403947617 |
| NAPSB   | 1.37453131   | 0.172799409 | 0.349244288  | 0.728179561 | -0.516932215 | 0.607230623 |
| NARF    | -0.833453059 | 0.40686671  | 0.902300509  | 0.370655238 | 0.68875134   | 0.493811523 |
| NARFL   | -0.589765365 | 0.556873258 | 0.696483356  | 0.488927533 | 1.572631534  | 0.121413913 |
| NARG2   | 1.357967509  | 0.177977887 | -0.231660022 | 0.817623154 | -0.426825178 | 0.671136294 |
| NARS    | 2.009051278  | 0.047624981 | 2.242930732  | 0.028764501 | 1.727514136  | 0.089564123 |
| NARS2   | 1.937926096  | 0.055868489 | -0.26594779  | 0.791229111 | -1.15636313  | 0.252421446 |
| NASP    | -0.254302409 | 0.799860734 | 3.240714449  | 0.001983198 | 3.388774341  | 0.001288581 |
| NAT1    | 0.11867776   | 0.905803658 | -1.435603306 | 0.156524043 | -1.440884332 | 0.155162299 |
| NAT10   | 0.649819199  | 0.517517438 | 2.362658759  | 0.021543794 | 2.579301748  | 0.012541431 |
| NAT14   | 0.001088934  | 0.999133644 | -0.416622094 | 0.67850343  | 0.516069636  | 0.607829018 |
| NAT6    | -0.149252328 | 0.881720532 | -2.961238991 | 0.004444736 | -1.870976257 | 0.066554429 |
| NAT8B   | -3.876391785 | 0.000204944 | 0.190478024  | 0.849604348 | 0.859744616  | 0.393580104 |
| NAT8L   | 0.967173033  | 0.336132716 | 0.025930318  | 0.979402551 | 0.748196854  | 0.457459082 |
| NAT9    | 1.285114727  | 0.202155569 | 1.178336415  | 0.243507937 | 1.382481509  | 0.172289773 |
| NAV1    | 1.521784055  | 0.131681832 | 0.341121332  | 0.734253533 | 0.5766938    | 0.566447617 |
| NAV2    | -0.429425755 | 0.668672739 | 1.079923504  | 0.284677709 | 0.665665872  | 0.508345923 |
| NAV3    | -2.965613276 | 0.003896345 | -1.15999616  | 0.250836314 | -1.257531465 | 0.21375838  |
| NBAS    | -0.079018077 | 0.937199319 | 3.000034201  | 0.003983697 | 3.477338966  | 0.000984109 |
| NBEA    | 1.71653733   | 0.089614602 | 0.445674607  | 0.657503088 | 0.255560776  | 0.799222428 |
| NBEAL1  | 0.227608653  | 0.820483382 | 0.105957957  | 0.915983884 | -0.532094053 | 0.596756827 |
| NBEAL2  | -1.12239063  | 0.264777756 | -1.189969272 | 0.238940433 | -1.334305512 | 0.187481676 |
| NBN     | -0.673348098 | 0.502506858 | -0.678525285 | 0.500155953 | -1.711693017 | 0.092463651 |
| NBPF1   | 1.111419841  | 0.26944308  | 0.159569132  | 0.873778759 | 0.556437802  | 0.580119139 |
| NBPF10  | -0.299832962 | 0.765018223 | -0.584295671 | 0.561303083 | -1.953005955 | 0.055801747 |
| NBPF14  | 0.310719135  | 0.756755747 | -0.420331924 | 0.675807058 | -0.693428801 | 0.490894698 |
| NBPF15  | 1.672825044  | 0.097946435 | 1.554760249  | 0.125481313 | 1.878257901  | 0.06553378  |
| NBPF16  | 2.411066378  | 0.018005188 | -0.539836366 | 0.591391021 | 1.163413836  | 0.249574289 |
| NBPF3   | 1.979671874  | 0.050894758 | 0.957341495  | 0.342396222 | 2.698013138  | 0.009191319 |
| NBPF9   | 3.094626192  | 0.002648798 | 0.132773103  | 0.894835608 | -0.134785003 | 0.893263117 |
| NBR1    | -1.795435604 | 0.076048932 | 1.573584025  | 0.121061215 | 0.622668559  | 0.536019201 |
| NBR2    | 1.174113418  | 0.243546657 | -0.970981981 | 0.335617341 | -1.263231546 | 0.211718182 |
| NCALD   | 0.002740642  | 0.997819548 | -1.404558134 | 0.165522761 | 0.165151032  | 0.869417345 |
| NCAM1   | 1.023746327  | 0.308787161 | -1.836575143 | 0.071434754 | -1.216904907 | 0.228722766 |
| NCAPD2  | -0.183126656 | 0.855123815 | 1.540509123  | 0.128912783 | 1.954825504  | 0.055581141 |
| NCAPD3  | -0.296871226 | 0.767270906 | 1.067368916  | 0.290258784 | 0.961822589  | 0.340256225 |
| NCAPG   | 1.074873874  | 0.285396776 | 0.955830804  | 0.343152476 | 0.737299567  | 0.464005388 |
| NCAPG2  | 1.638946316  | 0.104828138 | 1.731393079  | 0.088735403 | 0.59682527   | 0.55301929  |
| NCAPH   | 0.379588597  | 0.70517381  | 0.872570683  | 0.386520292 | 0.945540257  | 0.34842816  |
| NCAPH2  | -0.491247618 | 0.624485645 | 2.713605148  | 0.008764098 | 1.740871073  | 0.087175104 |
| NCBP1   | 2.829623858  | 0.005782977 | -0.088945892 | 0.929433472 | 0.623228325  | 0.535653988 |
| NCBP2   | 0.730900466  | 0.466799595 | 1.48217201   | 0.143745457 | 1.712869166  | 0.092245468 |
| NCDN    | 1.20902633   | 0.229921159 | 0.776890514  | 0.44040244  | 1.097838753  | 0.27695327  |
| NCEH1   | -0.140311693 | 0.888737367 | 0.54012094   | 0.591196037 | 0.010073454  | 0.991998333 |

|             |              |             |              |             |              |             |
|-------------|--------------|-------------|--------------|-------------|--------------|-------------|
| NCF1        | -3.121091921 | 0.002443905 | -0.83214295  | 0.408765265 | -0.851557909 | 0.398071214 |
| NCF1B       | -2.180370898 | 0.031923783 | -3.077878049 | 0.003189903 | -1.844311542 | 0.070407397 |
| NCF1C       | -3.367486554 | 0.001130588 | -0.749657908 | 0.456511932 | -1.120928274 | 0.267082332 |
| NCF2        | -2.844249334 | 0.005545825 | 0.385543063  | 0.7012554   | 0.063877916  | 0.949293953 |
| NCF4        | -1.520576601 | 0.13198449  | 0.516891116  | 0.607211402 | 0.28631203   | 0.775691264 |
| NCK1        | 1.174493336  | 0.243395344 | -0.606248762 | 0.546731618 | -0.786024367 | 0.435152729 |
| NCK2        | -0.462089714 | 0.645167981 | -2.588790739 | 0.012173154 | -3.523433703 | 0.000854052 |
| NCKAP1      | -1.212943591 | 0.228427468 | 0.062492465  | 0.950387026 | -2.058996714 | 0.044136925 |
| NCKAP1L     | -0.168035305 | 0.866944671 | 2.047895459  | 0.045139083 | 1.632564607  | 0.108148046 |
| NCKAP5L     | 0.182062096  | 0.85595662  | 0.996921647  | 0.322972493 | 0.69159764   | 0.492035461 |
| NCKIPSD     | -0.02097235  | 0.983315633 | -0.121827346 | 0.903459816 | 0.396708836  | 0.693083638 |
| NCL         | -0.181440434 | 0.856443021 | 3.1326044    | 0.002723211 | 3.116996542  | 0.002877122 |
| NCLN        | 0.783860811  | 0.435246097 | 0.946776422  | 0.347708046 | 1.71530236   | 0.091795442 |
| NCOA1       | -1.717955778 | 0.089354272 | -0.50202444  | 0.617564167 | -1.488629061 | 0.142171748 |
| NCOA2       | -0.943024941 | 0.348273903 | -0.602322853 | 0.549323285 | -2.784946922 | 0.007281924 |
| NCOA3       | 0.435451401  | 0.664310907 | 0.206795225  | 0.836899122 | -0.216124536 | 0.829672707 |
| NCOA4       | -4.988298794 | 3.08E-06    | 0.511733947  | 0.610793714 | -0.343926748 | 0.732184031 |
| NCOA5       | 0.395986719  | 0.693082196 | 0.863365122  | 0.391517783 | 1.384387589  | 0.171708738 |
| NCOA6       | -1.224657698 | 0.224002735 | 0.472587564  | 0.638293347 | 0.229595495  | 0.819239136 |
| NCOA7       | -0.266305292 | 0.790632863 | -0.552307483 | 0.582874698 | -2.141491322 | 0.036580968 |
| NCOR1       | 0.260130197  | 0.795376665 | 0.462925228  | 0.645162317 | 0.088791514  | 0.929563054 |
| NCOR2       | -0.227558199 | 0.820522485 | -1.148109359 | 0.25566963  | -0.797620226 | 0.428446014 |
| NCR1        | 0.222799675  | 0.824212542 | 0.487161666  | 0.627992745 | 1.022354011  | 0.310991261 |
| NCR3        | 1.424044551  | 0.158002714 | 0.368881245  | 0.713568795 | 0.231203496  | 0.817995854 |
| NCRNA00085  | -1.771310897 | 0.080003306 | -2.211740646 | 0.030966472 | -2.366113052 | 0.021446082 |
| NCRNA00086  | 1.984480536  | 0.050346834 | 0.283929499  | 0.777482611 | -0.005190333 | 0.995877101 |
| NCRNA00092  | 0.292100874  | 0.770903417 | -0.610249146 | 0.544097192 | 0.077771462  | 0.9382859   |
| NCRNA00094  | 1.31338397   | 0.192499433 | 0.102811837  | 0.918469438 | 0.573791139  | 0.568396957 |
| NCRNA00115  | 3.025765987  | 0.0032591   | -1.421185548 | 0.160654676 | -1.101606807 | 0.275325194 |
| NCRNA00116  | 1.139281276  | 0.257706251 | -0.784952187 | 0.435698473 | -0.141421635 | 0.888042257 |
| NCRNA00152  | -0.916712263 | 0.361822144 | -0.396041715 | 0.693537602 | -0.414394379 | 0.680161735 |
| NCRNA00173  | 1.977722618  | 0.051118309 | -1.968190581 | 0.053866205 | -0.951176988 | 0.34558476  |
| NCRNA00174  | -0.043100032 | 0.965720345 | -0.905289463 | 0.369083476 | -0.240024928 | 0.811183704 |
| NCRNA00176  | 1.04162744   | 0.300464162 | 0.470423605  | 0.63982897  | 0.84275987   | 0.402932886 |
| NCRNA00188  | -0.152526999 | 0.879123716 | -0.226416819 | 0.82167887  | 0.511285742  | 0.611152634 |
| NCRNA00189  | -2.392537663 | 0.01887958  | 1.984203885  | 0.052005065 | 1.32420535   | 0.190791799 |
| NCRNA00201  | 3.271893074  | 0.001531624 | -0.669583641 | 0.505798717 | -0.008039635 | 0.993613821 |
| NCRNA00202  | 1.377584116  | 0.171857619 | 1.138608773  | 0.259580163 | 1.182023981  | 0.242879314 |
| NCRNA00219  | 1.06535682   | 0.289655873 | 0.078664304  | 0.937572301 | 0.328953758  | 0.743412567 |
| NCRNA00239  | 1.245444986  | 0.216304895 | -1.118678877 | 0.267921132 | -1.63113991  | 0.108449145 |
| NCRNA00241  | -0.584740037 | 0.560232667 | -1.798934649 | 0.077268868 | -0.670177565 | 0.5054874   |
| NCRNA00247  | -0.097721622 | 0.922377645 | -1.011566203 | 0.315976279 | -1.64356043  | 0.10584696  |
| NCRNA00256A | -1.128012515 | 0.262409122 | 0.5040546    | 0.616145747 | 0.484306209  | 0.630049434 |
| NCRNA00263  | 1.510844592  | 0.134443962 | -1.595944351 | 0.115974075 | -1.026947936 | 0.308841977 |
| NCRNA00264  | -0.792690316 | 0.43010996  | 1.296879289  | 0.199844122 | 2.484447025  | 0.015978292 |
| NCRNA00265  | -0.261788816 | 0.794101725 | -0.050728098 | 0.959717704 | 0.137562684  | 0.891077398 |
| NCRNA00282  | 0.872045425  | 0.385578692 | -1.440495917 | 0.155141265 | -0.983293825 | 0.329674421 |
| NCRNA00287  | 2.847917502  | 0.005487763 | 0.952073638  | 0.345038064 | 1.901490736  | 0.062365462 |
| NCRNA00292  | -0.525706374 | 0.600426762 | -0.791556264 | 0.431867261 | 0.171222612  | 0.86466333  |
| NCRNA00294  | -0.100051548 | 0.920533099 | -1.065083996 | 0.291282608 | 0.228075025  | 0.820415168 |
| NCRNA00299  | 2.394859776  | 0.018767964 | -0.285013427 | 0.77665621  | 1.294943778  | 0.20063093  |
| NCRNA00304  | -0.287303331 | 0.774561795 | 0.358710447  | 0.721123268 | 0.295408841  | 0.768769543 |
| NCRNA00321  | -0.355966227 | 0.722725716 | -0.036693875 | 0.970855974 | -0.386448938 | 0.700622555 |
| NCRNA00324  | -0.02468958  | 0.980358986 | -0.593406981 | 0.555232052 | -0.966460618 | 0.337951709 |
| NCRNA00338  | -1.064019803 | 0.290257688 | -0.390820147 | 0.697372079 | 0.909533047  | 0.366950557 |
| NCRNA00339  | 0.443176615  | 0.658735689 | 0.39635529   | 0.693307582 | 1.161364594  | 0.250399411 |
| NCRNA00341  | 2.573501869  | 0.011757013 | 3.201096348  | 0.002229149 | 2.944684091  | 0.004693828 |
| NCRNA00346  | -0.808601056 | 0.420945571 | 0.104424696  | 0.917195115 | 0.345163248  | 0.731259342 |
| NCS1        | 1.120812311  | 0.265445426 | -0.881694103 | 0.381607003 | 0.085916893  | 0.931837648 |
| NCSTN       | -1.530892759 | 0.129416258 | -0.457680239 | 0.648904091 | -0.766205559 | 0.446758309 |
| NDC80       | -0.545757122 | 0.586626547 | 1.695491305  | 0.095382256 | 0.264072028  | 0.792689744 |
| NDE1        | -1.144333828 | 0.255617059 | -0.669606069 | 0.505784521 | -0.574546204 | 0.567889561 |
| NDEL1       | -2.852366561 | 0.005418089 | -0.435829076 | 0.664589871 | -0.811291307 | 0.420618885 |
| NDFIP1      | 2.25923844   | 0.026362055 | 0.58889423   | 0.558234862 | -0.221660568 | 0.825381072 |
| NDFIP2      | 1.291154402  | 0.200062949 | -1.641491432 | 0.106145331 | -1.476268087 | 0.145449795 |
| NDN         | -0.763494812 | 0.447229404 | 1.192390548  | 0.237997597 | 0.869827181  | 0.388092443 |
| NDNL2       | 1.022475893  | 0.309384346 | -0.318223951 | 0.751466066 | -1.103669384 | 0.274436855 |
| NDOR1       | -0.219633159 | 0.826670254 | 0.315754597  | 0.753330124 | 1.01280803   | 0.315489718 |
| NDRG1       | -2.330544935 | 0.022085957 | 0.628306287  | 0.53228696  | 0.739761046  | 0.462522042 |
| NDRG2       | 1.944486846  | 0.055060549 | 1.398229036  | 0.167405412 | 2.924149184  | 0.004970415 |
| NDRG3       | -1.165824576 | 0.246864674 | 0.236604606  | 0.813803007 | 0.941851058  | 0.350297387 |
| NDRG4       | 1.53275366   | 0.128957213 | 0.172950578  | 0.863296624 | 0.88146421   | 0.38181856  |

|         |              |             |              |             |              |             |
|---------|--------------|-------------|--------------|-------------|--------------|-------------|
| NDST1   | -3.424355528 | 0.000941262 | 0.907650347  | 0.367845001 | 0.430536543  | 0.66845098  |
| NDST2   | 0.362751135  | 0.717668688 | -1.100474394 | 0.275703585 | -0.931085193 | 0.35578945  |
| NDUFA1  | -0.510416353 | 0.611049643 | -1.308878358 | 0.195773894 | -0.380767645 | 0.70481026  |
| NDUFA10 | 0.11707711   | 0.907068219 | 2.000875855  | 0.05012629  | 3.60035417   | 0.000672701 |
| NDUFA11 | -0.798260823 | 0.426888086 | -1.669101526 | 0.100524655 | -0.906339313 | 0.368623352 |
| NDUFA12 | -0.317480748 | 0.751637898 | -2.52545136  | 0.014329903 | -1.784900649 | 0.079671172 |
| NDUFA13 | -0.879544472 | 0.381523872 | -0.873600699 | 0.385963616 | 0.002383723  | 0.998106502 |
| NDUFA2  | -1.297681884 | 0.197819453 | -2.01745127  | 0.04831657  | -0.725065974 | 0.471417859 |
| NDUFA3  | -1.436911423 | 0.154322049 | -3.852266215 | 0.000296566 | -2.621417586 | 0.011243011 |
| NDUFA4  | 0.669810123  | 0.504748902 | -1.71504856  | 0.091712381 | -1.155985663 | 0.252574524 |
| NDUFA5  | 0.67435398   | 0.501870402 | -1.205576174 | 0.232910457 | -1.128745355 | 0.263797441 |
| NDUFA6  | 0.678851948  | 0.4990297   | -2.222656615 | 0.030179481 | -1.098180992 | 0.27680512  |
| NDUFA7  | -1.293662243 | 0.199198778 | -3.203618914 | 0.00221267  | -2.843002667 | 0.006218044 |
| NDUFA8  | -0.070149403 | 0.944235392 | -0.220426966 | 0.82631812  | 0.629598198  | 0.531507135 |
| NDUFA9  | -0.771620883 | 0.442425308 | 2.737617441  | 0.008218468 | 3.612545543  | 0.00064757  |
| NDUFAB1 | 1.692585304  | 0.094105108 | -0.597870162 | 0.552270212 | 0.693498129  | 0.490851537 |
| NDUFAF1 | -0.387892875 | 0.699040715 | 1.738887014  | 0.087397424 | 1.451968296  | 0.152066893 |
| NDUFAF2 | 0.568771479  | 0.570973417 | -1.575996533 | 0.120503871 | -1.272706496 | 0.2083589   |
| NDUFAF3 | -0.017138389 | 0.986365371 | -3.680946106 | 0.000513736 | -3.070843004 | 0.003285269 |
| NDUFAF4 | 2.109915686  | 0.037731241 | -0.347032563 | 0.729831671 | -0.265060171 | 0.791932267 |
| NDUFB1  | -0.002630158 | 0.997907449 | -1.458373396 | 0.150169448 | -0.911024351 | 0.366171118 |
| NDUFB10 | 0.112876879  | 0.910387655 | -3.508953415 | 0.000880363 | -2.215059543 | 0.03082299  |
| NDUFB11 | 0.423666351  | 0.672852509 | 2.018453122  | 0.048209015 | 2.353417802  | 0.022122418 |
| NDUFB2  | 0.221838649  | 0.824958265 | -0.361635161 | 0.718948003 | -0.033155462 | 0.973668013 |
| NDUFB3  | 0.161610747  | 0.871986307 | -0.847618959 | 0.400158809 | -0.42474924  | 0.0726402   |
| NDUFB4  | -0.539739645 | 0.590752439 | -3.877209112 | 0.000273486 | -2.607256912 | 0.011665235 |
| NDUFB5  | 0.521255336  | 0.603510393 | 1.038993425  | 0.303149907 | 1.046907144  | 0.299621269 |
| NDUFB6  | -2.300275299 | 0.023819945 | -2.279502902 | 0.026359709 | -2.022846811 | 0.047853158 |
| NDUFB7  | 0.242162125  | 0.809223238 | -1.00544329  | 0.318888893 | -0.455522449 | 0.650487414 |
| NDUFB8  | 1.142901094  | 0.256208263 | 0.479413617  | 0.633459781 | 1.295329881  | 0.200498673 |
| NDUFB9  | 0.015150138  | 0.987947015 | 0.960670181  | 0.340733739 | 1.778861866  | 0.080667334 |
| NDUFC1  | -1.269861623 | 0.207512618 | -2.975579219 | 0.004268823 | -2.279826983 | 0.02643116  |
| NDUFC2  | -0.508610254 | 0.612310025 | 1.233819385  | 0.2222813   | 2.53930502   | 0.013899237 |
| NDUFS1  | 0.481892719  | 0.631089596 | 1.459510146  | 0.149857576 | 1.732286753  | 0.088704351 |
| NDUFS2  | 0.09218103   | 0.926765682 | 2.634341747  | 0.010809333 | 3.167027643  | 0.00248862  |
| NDUFS3  | 2.004558975  | 0.048113009 | 1.038622383  | 0.303321022 | 2.01898585   | 0.048265592 |
| NDUFS4  | 0.637042099  | 0.525766602 | 0.230688864  | 0.818373988 | 0.046638991  | 0.962966185 |
| NDUFS5  | 0.858211784  | 0.393128653 | -0.743658116 | 0.460106297 | 0.409268881  | 0.683896966 |
| NDUFS6  | -1.614417802 | 0.110050249 | -1.455962726 | 0.150832504 | -0.849161112 | 0.39939204  |
| NDUFS7  | -1.619133908 | 0.109030269 | -1.841490101 | 0.070701022 | -1.725303297 | 0.089964727 |
| NDUFS8  | -0.927872615 | 0.356035205 | 2.543760863  | 0.013673377 | 3.24255105   | 0.001994347 |
| NDUFV1  | -0.67084638  | 0.504091663 | 1.454626358  | 0.151201058 | 2.048451193  | 0.045194276 |
| NDUFV2  | -0.103524937 | 0.917784114 | -1.708738742 | 0.09288347  | -0.972291439 | 0.335069166 |
| NDUFV3  | -0.943271439 | 0.348148553 | -0.069183282 | 0.945083364 | 1.489060802  | 0.142058314 |
| NEAT1   | 2.41172636   | 0.017974719 | -0.763837523 | 0.448081871 | -1.02093981  | 0.311654935 |
| NEB     | -0.27738932  | 0.782137816 | -2.359412069 | 0.021715983 | -2.735002085 | 0.008328784 |
| NEBL    | -0.717323466 | 0.475091944 | 0.005458982  | 0.995663248 | 0.928344327  | 0.357196526 |
| NECAB1  | -0.828270277 | 0.409778982 | -0.412142254 | 0.681765096 | -1.261831356 | 0.212218    |
| NECAB2  | -1.157947912 | 0.250047428 | 0.929542617  | 0.356487501 | 0.106070824  | 0.915903622 |
| NECAB3  | 0.89346946   | 0.374065396 | 0.700807159  | 0.486245005 | 1.028382197  | 0.308173023 |
| NECAP1  | 0.04032639   | 0.967925114 | -2.913031365 | 0.005086726 | -3.263284764 | 0.001875784 |
| NECAP2  | -0.555608135 | 0.579901666 | 2.437350175  | 0.01790516  | 2.467925942  | 0.016657283 |
| NEDD1   | 0.969197811  | 0.335127438 | -0.040550621 | 0.96779439  | -0.235433447 | 0.814727575 |
| NEDD4   | 1.554449142  | 0.123699863 | -1.817133413 | 0.074400174 | -1.379973775 | 0.173056512 |
| NEDD4L  | -2.462356346 | 0.015769995 | 2.788997446  | 0.007154227 | 2.53559417   | 0.014031738 |
| NEDD8   | -2.121117457 | 0.036750812 | -1.646228095 | 0.10516329  | -1.379640082 | 0.173158736 |
| NEDD9   | -3.064534807 | 0.002901111 | -1.24454059  | 0.218341177 | -2.67602433  | 0.009742115 |
| NEFH    | 0.280493266  | 0.779763564 | 1.861479383  | 0.067781946 | 1.775206049  | 0.081275432 |
| NEFL    | 1.223125434  | 0.224577943 | 2.885206098  | 0.005495403 | 2.106790132  | 0.039609437 |
| NEFM    | 0.676660193  | 0.500412821 | 2.663390258  | 0.010013948 | 0.447768232  | 0.656040649 |
| NEGR1   | 0.131928104  | 0.895345129 | 0.122515452  | 0.902917299 | -0.006140215 | 0.995122578 |
| NEIL1   | 1.289761484  | 0.200544133 | -0.91246602  | 0.365327034 | 0.847551401  | 0.400280638 |
| NEIL2   | 0.770653903  | 0.442995403 | 2.735020069  | 0.008275947 | 3.955789879  | 0.000216025 |
| NEIL3   | -1.413686477 | 0.161014563 | 2.007354725  | 0.049412093 | 2.401613457  | 0.019651884 |
| NEK1    | 0.33007667   | 0.742133802 | 0.50890985   | 0.612759477 | -0.081100674 | 0.935649834 |
| NEK11   | 0.446529498  | 0.656321911 | 0.954199067  | 0.343970555 | 1.541538548  | 0.128794441 |
| NEK2    | 1.490148205  | 0.139794088 | 1.26040911   | 0.212604267 | 1.638782932  | 0.106841798 |
| NEK3    | 1.380835654  | 0.170858823 | 1.703438714  | 0.093876636 | 2.14350445   | 0.036411665 |
| NEK4    | 1.713949426  | 0.090091163 | 1.094370032  | 0.278348309 | 0.870163898  | 0.387910007 |
| NEK5    | -0.269253192 | 0.788371009 | 1.181400102  | 0.242298953 | 0.944147622  | 0.349133008 |
| NEK6    | -1.05972812  | 0.292195234 | -0.18252258  | 0.855813563 | -2.120955719 | 0.038347722 |
| NEK7    | 0.321288912  | 0.748760375 | -0.426646731 | 0.671227156 | -1.767374663 | 0.082590944 |

|          |              |             |              |             |              |             |
|----------|--------------|-------------|--------------|-------------|--------------|-------------|
| NEK8     | -1.177687623 | 0.242125785 | 0.419512235  | 0.676402457 | 1.049699536  | 0.298346435 |
| NEK9     | 1.787782719  | 0.077285399 | 2.10473765   | 0.039688186 | 1.943439903  | 0.056973911 |
| NELF     | -0.156508659 | 0.875993925 | -2.64570559  | 0.010491553 | -0.36545577  | 0.716142222 |
| NELL2    | 5.498909986  | 3.76E-07    | 2.349828697  | 0.022231428 | 3.501651346  | 0.000913329 |
| NEMF     | 1.360920683  | 0.177046102 | 0.843998642  | 0.402162047 | -0.391382558 | 0.696993522 |
| NENF     | -0.646127886 | 0.519893609 | 0.910391598  | 0.366410328 | 0.724449068  | 0.471793418 |
| NEO1     | 1.307737266  | 0.194400139 | -0.917425951 | 0.362745214 | 0.042403139  | 0.966327521 |
| NET1     | 2.734193587  | 0.007572855 | 1.828482092  | 0.072656879 | 2.570118706  | 0.012842054 |
| NETO1    | 0.220253183  | 0.826188882 | 0.700257081  | 0.486585825 | -0.54196377  | 0.589984515 |
| NETO2    | -1.444570581 | 0.152162766 | -0.525789477 | 0.601053101 | -0.827565409 | 0.411414707 |
| NEU1     | -1.802447727 | 0.074930448 | 1.207818824  | 0.232053155 | 0.702474948  | 0.485280669 |
| NEU3     | 0.737147117  | 0.46301197  | -0.88589464  | 0.379358142 | -0.055379115 | 0.956032715 |
| NEURL    | 1.380662391  | 0.170911933 | -0.53524919  | 0.594538227 | -1.218723851 | 0.228036797 |
| NEURL1B  | -1.251101741 | 0.214244037 | 0.363152528  | 0.717820375 | -0.181406506 | 0.856700765 |
| NEURL2   | 2.69296288   | 0.008492163 | -1.180377315 | 0.24270208  | -0.930581551 | 0.356047735 |
| NEURL4   | 1.126165608  | 0.263185621 | 0.488680504  | 0.626923488 | 1.473007895  | 0.146324208 |
| NEXN     | -3.537964738 | 0.000648881 | 1.432113838  | 0.157516103 | 0.397804445  | 0.692280416 |
| NF1      | 0.777149394  | 0.439174113 | -0.914468147 | 0.364283442 | -1.400184435 | 0.166951156 |
| NF2      | -0.563945544 | 0.574238948 | 1.484937112  | 0.143013304 | 1.638762234  | 0.106846124 |
| NFAM1    | -3.276887758 | 0.001507732 | -0.465842033 | 0.643085443 | -0.365718962 | 0.715946888 |
| NFAT5    | -0.252423099 | 0.801308169 | -2.77578142  | 0.00741513  | -2.383153586 | 0.020567328 |
| NFATC1   | -0.44766867  | 0.655502637 | 0.837965685  | 0.405513959 | 0.032203456  | 0.974423824 |
| NFATC2   | 0.732098172  | 0.46607202  | -1.326387204 | 0.189947003 | -1.465459    | 0.148364739 |
| NFATC2IP | 3.666116581  | 0.000422638 | -0.054950072 | 0.956368408 | 0.981739555  | 0.330432995 |
| NFATC3   | -1.266525289 | 0.208698213 | 1.889484569  | 0.063863904 | 1.898317099  | 0.062790437 |
| NFE2     | -2.601975228 | 0.010889705 | 1.2864464    | 0.203434345 | 0.679780912  | 0.499431954 |
| NFE2L1   | -0.916125889 | 0.362127843 | 1.78184967   | 0.080045594 | 1.418759217  | 0.161487811 |
| NFE2L2   | -0.72183248  | 0.472328912 | 0.590659416  | 0.557059332 | -0.672401761 | 0.504081397 |
| NFE2L3   | 1.763689157  | 0.081287401 | 0.258956354  | 0.796592172 | -1.550549626 | 0.126619536 |
| NFIA     | 2.218699837  | 0.029104408 | 0.258048927  | 0.797288979 | 1.196719438  | 0.236436656 |
| NFIC     | 0.177259781  | 0.859715486 | -1.906919828 | 0.06152291  | -2.057440094 | 0.044291639 |
| NFIL3    | -3.866890291 | 0.000211869 | -0.710568259 | 0.480219269 | -1.448930541 | 0.152910403 |
| NFIX     | -2.628919577 | 0.010122677 | -0.592508074 | 0.555829543 | -0.738907853 | 0.463035889 |
| NFKB1    | -0.139588971 | 0.889306698 | 1.204047691  | 0.233496072 | 0.61602113   | 0.540366047 |
| NFKB2    | -0.368154428 | 0.713650397 | 0.767590541  | 0.445865906 | 0.464431199  | 0.644131877 |
| NFKBIA   | 2.22065393   | 0.028966699 | -0.710519791 | 0.480249086 | -1.442502086 | 0.154707473 |
| NFKBIB   | -0.731239771 | 0.466593411 | -1.660812982 | 0.102185828 | -1.233215136 | 0.22262547  |
| NFKBID   | 2.056508118  | 0.042722908 | -1.425855895 | 0.159307481 | -0.955207616 | 0.343560883 |
| NFKBIE   | 0.688157439  | 0.49318049  | 2.021780857  | 0.047853241 | 1.658155332  | 0.102854452 |
| NFKBIL1  | -0.297775413 | 0.766582972 | 2.325889987  | 0.023566974 | 2.364489389  | 0.021531539 |
| NFKBIZ   | 0.482351326  | 0.630765144 | -0.873297837 | 0.386127247 | -2.153500076 | 0.03558115  |
| NFRKB    | 1.115335944  | 0.267771215 | 1.115830531  | 0.269128478 | 2.062134722  | 0.043826459 |
| NFS1     | 1.001790824  | 0.31921684  | 0.436984974  | 0.663756247 | 1.519525624  | 0.134232859 |
| NFU1     | 1.073986514  | 0.285792059 | 0.62897081   | 0.531854884 | 0.845224151  | 0.401567488 |
| NFX1     | 2.421507622  | 0.017528513 | 0.932764482  | 0.35483537  | 1.673801614  | 0.09972348  |
| NFXL1    | -0.984404499 | 0.327640531 | 1.071051256  | 0.288614042 | 0.47144981   | 0.63914349  |
| NFYA     | -1.749732057 | 0.083682964 | -0.006388746 | 0.99492463  | -0.399488548 | 0.691046444 |
| NFYB     | 0.263761317  | 0.792586239 | -0.58766136  | 0.559056628 | -0.764465739 | 0.447785686 |
| NFYC     | -2.223751607 | 0.028749568 | -1.363189057 | 0.178128297 | -1.576205696 | 0.120587723 |
| NGDN     | 0.86987082   | 0.386759516 | -0.27409351  | 0.784993395 | 1.495052395  | 0.140491472 |
| NGFR     | 0.251755766  | 0.801822314 | -0.779679357 | 0.438771785 | 0.329189748  | 0.74323515  |
| NGFRAP1  | -1.435087684 | 0.154839676 | 0.878175446  | 0.383497249 | 1.128934297  | 0.263718399 |
| NGLY1    | 1.053465283  | 0.295038515 | 0.697020211  | 0.488594019 | 1.216755008  | 0.228779364 |
| NGRN     | 0.565412743  | 0.573245198 | 0.164447928  | 0.869954298 | 0.866533517  | 0.389879807 |
| NHEJ1    | -1.563325472 | 0.121598578 | 1.212080658  | 0.230430316 | 1.225605258  | 0.225455263 |
| NHLH1    | 0.02190168   | 0.98257643  | 0.027765017  | 0.977945548 | -0.259803624 | 0.795964058 |
| NHLRC1   | 0.141046076  | 0.88815891  | 0.271471577  | 0.786999015 | 0.277434933  | 0.782463496 |
| NHLRC2   | 0.930215605  | 0.354827883 | -1.979043304 | 0.052598732 | -3.481429644 | 0.000971846 |
| NHLRC3   | 1.645400131  | 0.103487895 | 1.642309259  | 0.105975242 | 1.278093258  | 0.206466834 |
| NHLRC4   | 1.349233471  | 0.180755383 | 1.23910882   | 0.22033091  | 1.32819652   | 0.189478532 |
| NHP2     | -1.1063502   | 0.271618216 | -0.832679052 | 0.408465252 | 0.786872694  | 0.434659981 |
| NHP2L1   | -0.9078655   | 0.36645179  | -0.145274057 | 0.885001695 | 1.421564644  | 0.160674845 |
| NHS      | -1.880829293 | 0.063333091 | 0.017847522  | 0.985822176 | -0.807936974 | 0.422531325 |
| NHSL1    | 0.219671691  | 0.826640337 | 1.988285604  | 0.051539591 | 1.115022354  | 0.269583198 |
| NHSL2    | -3.096803405 | 0.002631358 | -0.876325972 | 0.384493155 | -1.661185154 | 0.102241965 |
| NICN1    | 0.898957819  | 0.37115111  | -0.952622919 | 0.344761977 | 0.851639684  | 0.398026197 |
| NID1     | 2.618521916  | 0.010412675 | 0.512196043  | 0.610472337 | -0.056295372 | 0.955306044 |
| NID2     | -0.902304368 | 0.369381167 | -2.177026018 | 0.033590635 | -1.640868031 | 0.106406677 |
| NIF3L1   | 2.864190445  | 0.005236853 | 0.095226623  | 0.924465361 | 1.016323322  | 0.313828089 |
| NIN      | -0.181565062 | 0.856345505 | 0.497697691  | 0.620592037 | -1.031579688 | 0.306685226 |
| NINJ1    | -4.35532871  | 3.61E-05    | -0.705050243 | 0.483620515 | -0.518593995 | 0.606078559 |
| NINJ2    | -4.563917063 | 1.64E-05    | -1.643458984 | 0.105736501 | -1.893572071 | 0.06343042  |

|           |              |             |              |             |              |             |
|-----------|--------------|-------------|--------------|-------------|--------------|-------------|
| NINL      | 0.176118388  | 0.860609356 | -1.256687413 | 0.213939634 | -0.547955903 | 0.585890704 |
| NIP7      | 1.280587073  | 0.203734918 | -0.023941384 | 0.980982118 | -0.265636131 | 0.791490849 |
| NIPA1     | 0.677593377  | 0.499823676 | -1.245777356 | 0.21788999  | -1.770295457 | 0.082098253 |
| NIPA2     | -1.150758683 | 0.252977762 | -0.584592138 | 0.561105023 | -0.343287379 | 0.732662324 |
| NIPAL2    | 1.40802276   | 0.162679974 | -1.979632203 | 0.052530693 | -2.31482161  | 0.024297079 |
| NIPAL3    | 0.775589633  | 0.440089957 | 1.451253138  | 0.152134482 | 2.12157829   | 0.038293084 |
| NIPAL4    | 0.716470274  | 0.475615776 | 0.53083211   | 0.597576136 | 0.049808069  | 0.96045182  |
| NIPBL     | -1.223132948 | 0.22457512  | 0.609018789  | 0.544906745 | -0.396142363 | 0.693499075 |
| NIPSNAP1  | 0.828678198  | 0.40954931  | 1.10818132   | 0.272389744 | 1.426992577  | 0.159110941 |
| NIPSNAP3A | 0.969856709  | 0.334800728 | -0.355361642 | 0.723616798 | -0.262785047 | 0.793676602 |
| NIPSNAP3B | 0.790394053  | 0.431442245 | -1.180577231 | 0.242623246 | -0.47765694  | 0.634745767 |
| NISCH     | 1.972995652  | 0.051663899 | -0.875681279 | 0.38484069  | 0.005147134  | 0.995911414 |
| NIT1      | -1.065601979 | 0.289545615 | 1.436225227  | 0.156347742 | 1.207832176  | 0.232166855 |
| NIT2      | 2.478467367  | 0.015121006 | -1.356700129 | 0.180170391 | 0.081415225  | 0.93540081  |
| NKAP      | -0.462836757 | 0.644634495 | 2.547469951  | 0.013543748 | 2.375099721  | 0.020978555 |
| NKAPP1    | 1.506316328  | 0.135600565 | -0.859086684 | 0.393854089 | -1.851899781 | 0.069292244 |
| NKD1      | 1.65547257   | 0.101423903 | -1.305238568 | 0.197001913 | -0.503360128 | 0.616677083 |
| NKG7      | 0.405103093  | 0.686393982 | -2.662229275 | 0.010044682 | -1.621013429 | 0.110608971 |
| NKIRAS1   | -1.546586286 | 0.125585218 | -1.804474517 | 0.076385977 | -0.534253227 | 0.595272163 |
| NKIRAS2   | -1.679380556 | 0.09665818  | 0.093243048  | 0.926034068 | 0.005406487  | 0.995705402 |
| NKPD1     | 0.767621271  | 0.444786098 | 0.530332138  | 0.597920454 | 0.091182092  | 0.927671919 |
| NKRF      | 2.060988217  | 0.042283386 | 1.193864581  | 0.237424935 | 1.72134678   | 0.090685346 |
| NKTR      | 2.115535354  | 0.037236588 | -1.805266034 | 0.076260524 | -2.307907199 | 0.024706167 |
| NKX3-1    | -2.375454508 | 0.019719015 | 0.638200366  | 0.525872702 | 0.094129242  | 0.925341068 |
| NLE1      | 1.951860529  | 0.054164345 | 0.249831846  | 0.803606307 | 0.406848017  | 0.685663954 |
| NLGN2     | 0.82044945   | 0.4141974   | 0.40343629   | 0.68812114  | 0.770211164  | 0.444398209 |
| NLGN3     | -0.397826114 | 0.691730745 | -0.6467664   | 0.520352335 | 0.669310624  | 0.506036002 |
| NLK       | -1.413487526 | 0.161072841 | -0.241095911 | 0.810336993 | -1.667825632 | 0.100909995 |
| NLN       | 1.565328777  | 0.121128287 | 2.627882135  | 0.01099386  | 2.29991603   | 0.025186583 |
| NLRC3     | 2.031486059  | 0.045250632 | -0.194447815 | 0.846509482 | 0.540347001  | 0.591091402 |
| NLRC4     | -2.804475768 | 0.006212602 | 2.377492738  | 0.020772492 | 1.257155382  | 0.2138935   |
| NLRC5     | 0.554095518  | 0.580931874 | -0.118136471 | 0.906370562 | -0.327436706 | 0.744553414 |
| NLRP1     | 1.654380296  | 0.101646102 | -0.066034665 | 0.947578907 | 0.320904694  | 0.749472138 |
| NLRP12    | -2.227297242 | 0.028502789 | 1.935305611  | 0.057867666 | 2.185952063  | 0.032998105 |
| NLRP2     | 3.731011269  | 0.000338931 | 0.40294339   | 0.688481679 | 1.654186775  | 0.103661236 |
| NLRP3     | -1.588318272 | 0.11583435  | 2.186601179  | 0.032848002 | 1.402812379  | 0.166169654 |
| NLRP6     | 0.60535368   | 0.546516504 | -1.976372246 | 0.052908284 | -3.480447664 | 0.000974776 |
| NLRP7     | 1.534467597  | 0.12853556  | 0.718035303  | 0.475638044 | 2.172609335  | 0.034039489 |
| NLRP9     | 1.210887011  | 0.229210784 | 0.697364856  | 0.48837998  | 0.505000122  | 0.615532101 |
| NLRX1     | -1.686614983 | 0.095252545 | 0.283831583  | 0.777557276 | 1.440088082  | 0.155386545 |
| NMB       | 0.135324259  | 0.892667436 | -3.551136534 | 0.000772381 | -1.766125208 | 0.082802457 |
| NMD3      | 0.94443027   | 0.347559652 | 0.315041231  | 0.753868904 | 0.498479876  | 0.620089948 |
| NME1      | 1.075758924  | 0.285002896 | 0.654317053  | 0.515511864 | 1.843671433  | 0.070502153 |
| NME2      | 0.088134683  | 0.929971748 | -5.143380477 | 3.38E-06    | -3.51111957  | 0.000887097 |
| NME3      | 1.109856623  | 0.27011248  | -0.952749173 | 0.344698538 | -0.771531989 | 0.443621585 |
| NME4      | -0.391732293 | 0.696211837 | -0.724114196 | 0.471926719 | -0.863679548 | 0.391432712 |
| NME6      | -1.543494922 | 0.126332674 | -0.601983588 | 0.549547541 | -0.75308852  | 0.454537922 |
| NME7      | 1.273652375  | 0.206171582 | 0.269139788  | 0.788783912 | 0.7665732    | 0.44654139  |
| NMI       | -2.416496259 | 0.017755875 | 0.488525498  | 0.627032575 | -0.727519969 | 0.4699256   |
| NMNAT1    | -4.193539643 | 6.57E-05    | 1.877279527  | 0.065547203 | 2.582461641  | 0.012439475 |
| NMNAT3    | -1.127861252 | 0.262472658 | 1.362690934  | 0.178284429 | 0.847341424  | 0.40039664  |
| NMRAL1    | 0.420859715  | 0.67489311  | 1.879997208  | 0.065169171 | 2.591945741  | 0.012137974 |
| NMT1      | -0.511688035 | 0.610162905 | 0.718651693  | 0.475260974 | 1.20117869   | 0.234716495 |
| NMT2      | 1.654285806  | 0.101665342 | 0.515076976  | 0.608470456 | 1.114380615  | 0.269855934 |
| NMUR1     | 1.46433832   | 0.146697935 | -2.860119812 | 0.005889709 | -1.152713717 | 0.253904218 |
| NNAT      | 1.076396885  | 0.284719212 | -0.65771452  | 0.513341711 | -1.231010991 | 0.2234424   |
| NNT       | 0.37674378   | 0.707279355 | 1.501495522  | 0.138690189 | 1.253947007  | 0.215048784 |
| NOB1      | 0.328038847  | 0.74366875  | 3.433892799  | 0.00110889  | 3.659562324  | 0.000558793 |
| NOC2L     | 0.139408882  | 0.889448574 | 2.312108714  | 0.024367827 | 2.452058106  | 0.017333805 |
| NOC3L     | 1.24555084   | 0.216266197 | -0.585762555 | 0.560323449 | -0.418262528 | 0.677348124 |
| NOC4L     | -0.223787434 | 0.823446244 | -0.626816444 | 0.533256324 | -0.863645311 | 0.391451365 |
| NOD1      | -1.299833515 | 0.197084056 | 1.005924028  | 0.31865956  | 1.609288254  | 0.11315321  |
| NOD2      | -1.730552819 | 0.087069407 | -0.359730599 | 0.720364263 | -0.263840001 | 0.792867637 |
| NODAL     | 0.652070469  | 0.516071064 | -0.042445232 | 0.966290573 | 0.45430762   | 0.651356117 |
| NOG       | 2.390481086  | 0.018978924 | -1.55323369  | 0.125845357 | -0.622684749 | 0.536008635 |
| NOL10     | 0.623227419  | 0.534761993 | 4.152923892  | 0.000109873 | 4.49507033   | 3.52E-05    |
| NOL11     | 1.595739845  | 0.114165391 | 0.989372033  | 0.326619401 | 1.874051498  | 0.066121752 |
| NOL12     | 0.808178191  | 0.421187619 | 0.364774915  | 0.716615399 | 0.992473231  | 0.325217972 |
| NOL3      | 1.062450132  | 0.290965318 | 2.077475845  | 0.042226545 | 1.099481492  | 0.27624266  |
| NOL6      | 1.727289907  | 0.087656585 | 1.803080069  | 0.076607412 | 2.53585056   | 0.014022546 |
| NOL7      | 0.290735771  | 0.771943856 | -2.078113855 | 0.042165566 | -1.005602833 | 0.31891403  |
| NOL8      | 0.766065046  | 0.445706639 | 1.416475515  | 0.162022249 | 2.071926731  | 0.042869808 |

|              |              |             |              |             |              |             |
|--------------|--------------|-------------|--------------|-------------|--------------|-------------|
| NOL9         | 0.473658147  | 0.636927593 | 1.473986939  | 0.145930023 | 2.540693534  | 0.01384995  |
| NOLC1        | 1.634094403  | 0.105844921 | 1.98497515   | 0.051916835 | 1.938925529  | 0.057534339 |
| NOM1         | 1.719806525  | 0.089015535 | 1.302898017  | 0.197794637 | 1.966614649  | 0.054169805 |
| NOMO1        | -1.085951935 | 0.280493587 | 0.622363838  | 0.536158856 | 2.662170525  | 0.010104479 |
| NOMO2        | 1.413776015  | 0.16098834  | 1.805385864  | 0.076241547 | 0.757010396  | 0.452203707 |
| NOMO3        | -0.683836743 | 0.495891721 | 1.173531745  | 0.245412693 | 0.801827735  | 0.426027858 |
| NONO         | -0.003655399 | 0.997091771 | 1.184754445  | 0.240980247 | 1.897402769  | 0.062913329 |
| NOP10        | -3.185450278 | 0.0020056   | -3.251845725 | 0.001918836 | -3.077909761 | 0.003219447 |
| NOP14        | 2.628972856  | 0.01012121  | 2.856162089  | 0.005954255 | 2.92444862   | 0.004966276 |
| NOP16        | 1.303971723  | 0.195675402 | 1.303662903  | 0.197535314 | 1.74748634   | 0.086011594 |
| NOP2         | 2.12779213   | 0.036177172 | 0.760035265  | 0.450333442 | 2.498341273  | 0.015426711 |
| NOP56        | 0.775357315  | 0.440226463 | 1.375410855  | 0.174330115 | 2.648938348  | 0.010462048 |
| NOP58        | 1.630499555  | 0.10660339  | 0.197329505  | 0.844264422 | 0.842725633  | 0.402951876 |
| NOS3         | 0.870979373  | 0.386157285 | 0.925679739  | 0.35847488  | 0.878183735  | 0.383580667 |
| NOSIP        | 0.17197089   | 0.863858947 | -0.161161617 | 0.872530082 | 0.127300269  | 0.899156847 |
| NOTCH1       | -0.985516429 | 0.327097445 | -1.596601244 | 0.115827274 | -1.749470206 | 0.085665188 |
| NOTCH2       | -0.713216068 | 0.477616708 | 0.535981173  | 0.594035497 | -0.10544577  | 0.916397314 |
| NOTCH2NL     | -0.60425747  | 0.547241633 | -1.564443984 | 0.123191569 | -2.880013345 | 0.005616842 |
| NOTCH3       | -0.217512032 | 0.828317549 | 0.976883325  | 0.332712229 | 0.734855789  | 0.465480753 |
| NOTCH4       | 3.083681475  | 0.002738109 | 1.417923195  | 0.161600954 | 0.981916706  | 0.330346477 |
| NOV          | -2.61089374  | 0.01063019  | -1.157481107 | 0.251853467 | -1.574460575 | 0.120990552 |
| NOXA1        | 1.154189818  | 0.251576207 | -0.859438078 | 0.393661879 | 0.861754452  | 0.392482372 |
| NPAS2        | 0.871394051  | 0.385932157 | -0.975745486 | 0.333271064 | -0.618242727 | 0.538911301 |
| NPAT         | 0.818695488  | 0.415192232 | -1.46713627  | 0.147778416 | -1.567093771 | 0.122702972 |
| NPC1         | 0.949881352  | 0.344798144 | -1.621191619 | 0.110438871 | -1.334613491 | 0.187381431 |
| NPC1L1       | -1.80583016  | 0.074395831 | -0.294723952 | 0.769264458 | -0.025744372 | 0.979552369 |
| NPC2         | -3.307736651 | 0.001367738 | 0.954260361  | 0.343939802 | 0.562402751  | 0.576076707 |
| NPDC1        | -0.078964338 | 0.937241939 | 0.396158078  | 0.693452242 | -0.383446401 | 0.702834583 |
| NPEPL1       | 1.117604341  | 0.266806114 | -3.32833199  | 0.001527033 | -3.669547405 | 0.000541499 |
| NPEPPS       | -0.892682759 | 0.374484306 | 1.090529512  | 0.280021273 | 0.598863609  | 0.551668639 |
| NPFF         | 1.245003817  | 0.216466229 | 1.002982634  | 0.32006447  | 2.867638543  | 0.005811594 |
| NPHP3        | 1.765539961  | 0.080974027 | -0.486127432 | 0.628721301 | -0.542708149 | 0.589475221 |
| NPHP3-ACAD1: | 2.346957028  | 0.021193285 | -1.846528611 | 0.069955439 | -1.203753777 | 0.233727307 |
| NPHP4        | 1.069331788  | 0.287871718 | 0.277433814  | 0.782440387 | -0.631413971 | 0.530381116 |
| NPIP         | -0.1485613   | 0.882242872 | -3.571808116 | 0.00072419  | -1.144973143 | 0.257069827 |
| NPIPL3       | 0.136345947  | 0.891862131 | 2.293063091  | 0.025514414 | 2.862200559  | 0.005899137 |
| NPL          | -3.749441429 | 0.000318198 | 0.568553419  | 0.571869475 | 0.37919258   | 0.705972882 |
| NPLOC4       | -0.442175493 | 0.659457111 | 1.815440185  | 0.074663258 | 2.472653135  | 0.016460393 |
| NPM1         | 1.658441341  | 0.100821962 | 1.472929679  | 0.146214094 | 2.110175296  | 0.039304678 |
| NPM3         | 0.25789063   | 0.797099048 | -0.716318334 | 0.476689266 | -0.345822499 | 0.730766501 |
| NPPA         | -0.375025808 | 0.708551989 | 0.553297259  | 0.582201319 | 1.282680524  | 0.204865709 |
| NPPA-AS1     | 0.112951227  | 0.910328884 | 0.057041591  | 0.954709493 | 1.160280719  | 0.250836621 |
| NPR2         | 2.738529491  | 0.00748165  | -1.792884907 | 0.078242748 | -0.18473369  | 0.854102513 |
| NPR3         | -0.94469257  | 0.346525034 | -0.026713227 | 0.978780804 | 0.067133306  | 0.94671369  |
| NPRL2        | 1.546127693  | 0.125695878 | -0.993124469 | 0.324803335 | -0.397411017 | 0.692568808 |
| NPRL3        | -2.731763903 | 0.007624405 | 0.879771025  | 0.382639366 | 0.763254115  | 0.448501973 |
| NPTN         | -1.969858895 | 0.052028676 | -1.890682317 | 0.063700704 | -3.071568411 | 0.003278455 |
| NPTX1        | -0.383799639 | 0.702061293 | -0.970206532 | 0.336000321 | -0.256315682 | 0.79864242  |
| NPTXR        | 0.868621001  | 0.387439191 | 1.091399768  | 0.279641568 | 1.755454152  | 0.084627327 |
| NPY6R        | 1.327852438  | 0.187692749 | 1.607501108  | 0.113413204 | -0.411589473 | 0.682204832 |
| NQO1         | -0.483799979 | 0.629740737 | 0.865268237  | 0.390481337 | 0.401199603  | 0.689793587 |
| NQO2         | -2.324107051 | 0.022445106 | -0.313151661 | 0.755296619 | -0.537353655 | 0.593143317 |
| NR1D1        | 1.081984746  | 0.282242747 | -0.623560795 | 0.535377791 | 0.340725007  | 0.734580231 |
| NR1D2        | 2.400010229  | 0.018522494 | -0.457356206 | 0.649135555 | -0.511555672 | 0.61096488  |
| NR1H2        | -1.66450511  | 0.099601483 | -0.244409329 | 0.807782414 | -0.773806448 | 0.442286106 |
| NR1H3        | -1.787110878 | 0.077394739 | 0.494419622  | 0.622890443 | 0.639407636  | 0.525153929 |
| NR2C1        | 2.625604767  | 0.010214326 | -1.123939035 | 0.265701527 | -0.116841498 | 0.907401935 |
| NR2C2        | 1.343226328  | 0.182684625 | -1.02699298  | 0.308717589 | -1.569906364 | 0.122046902 |
| NR2C2AP      | 1.998184462  | 0.048812847 | 0.618615626  | 0.538608524 | 1.886107705  | 0.064448367 |
| NR2F6        | -0.106701353 | 0.915271039 | 0.278823223  | 0.781379162 | 0.864084206  | 0.391212295 |
| NR3C1        | -1.060319737 | 0.291927616 | -0.416334314 | 0.678712771 | -1.871268708 | 0.066513179 |
| NR3C2        | 3.379947083  | 0.00108627  | 1.474498213  | 0.145792806 | 1.855262546  | 0.068802842 |
| NR4A1        | -0.46839014  | 0.640674501 | -1.278742648 | 0.206116176 | -0.965880637 | 0.338239322 |
| NR4A2        | -1.718363175 | 0.089279617 | -1.2528047   | 0.215339382 | -1.954457029 | 0.055625755 |
| NR6A1        | -0.976279398 | 0.331627025 | -1.433571537 | 0.157101085 | -1.576765269 | 0.120458785 |
| NRADDP       | -0.608044502 | 0.544738614 | 0.183037555  | 0.855411344 | -0.57780445  | 0.565702611 |
| NRARP        | 1.569085975  | 0.12025016  | -0.319023712 | 0.750862664 | 0.76975698   | 0.444665446 |
| NRAS         | 0.369692657  | 0.712507926 | -0.565327854 | 0.574046435 | -1.026716282 | 0.308950115 |
| NRBF2        | -2.602112973 | 0.010885654 | -1.386808123 | 0.170844386 | -2.029462541 | 0.047153524 |
| NRBP1        | -2.024766677 | 0.045950884 | 1.442802533  | 0.154492666 | 1.94401166   | 0.056903265 |
| NRBP2        | 2.052452502  | 0.043124169 | -2.960142647 | 0.004458458 | -2.327700406 | 0.023551153 |
| NRCAM        | 4.742165519  | 8.18E-06    | -1.143188259 | 0.257689927 | -0.361606024 | 0.719001579 |

|         |              |             |              |             |              |              |
|---------|--------------|-------------|--------------|-------------|--------------|--------------|
| NRD1    | -1.404213775 | 0.163807416 | 1.029829843  | 0.307395186 | 0.899543764  | 0.372198867  |
| NRF1    | -0.409079159 | 0.683484714 | 1.50374567   | 0.138110771 | 1.622549957  | 0.110279025  |
| NRG1    | -0.392985272 | 0.69528957  | -0.136222964 | 0.892120039 | -0.282775679 | 0.778387038  |
| NRG4    | 1.450335398  | 0.150553027 | -4.419035641 | 4.44E-05    | -2.307369645 | 0.024738226  |
| NRGN    | -3.15840812  | 0.002179981 | -0.644792023 | 0.521621995 | -1.69819752  | 0.094997735  |
| NRIP1   | -0.202578056 | 0.839936814 | -0.373882459 | 0.709864576 | -0.990157688 | 0.326338317  |
| NRIP2   | 1.823369838  | 0.071674173 | 0.721144525  | 0.473737732 | 1.805063073  | 0.076419261  |
| NRIP3   | -1.304409126 | 0.195526948 | 2.216582969  | 0.030615159 | 1.020824626  | 0.311709032  |
| NRL     | -1.137355322 | 0.258505781 | 0.639516652  | 0.52502243  | -1.367855673 | 0.176798569  |
| NRM     | -1.096103444 | 0.276051874 | -0.617157674 | 0.539562932 | -0.820891113 | 0.415174567  |
| NRN1    | -1.419518767 | 0.159313308 | -1.283906114 | 0.204315774 | 0.199145419  | 0.84286727   |
| NRN1L   | 1.584510398  | 0.116698205 | -1.990737473 | 0.051261706 | -0.8164138   | 0.417708437  |
| NRP1    | 1.038178937  | 0.302057362 | 0.982236494  | 0.33009143  | -0.050057012 | 0.960254325  |
| NRP2    | -1.997988315 | 0.048834518 | 2.017638583  | 0.048296445 | -0.002971456 | 0.99763964   |
| NRSN2   | 0.821580203  | 0.413556808 | 0.840567773  | 0.404066142 | 1.028744477  | 0.308004207  |
| NRXN1   | -1.009948494 | 0.315314575 | -0.214297535 | 0.831071925 | -1.547316626 | 0.127396449  |
| NRXN2   | 0.558743688  | 0.577768893 | -2.624442184 | 0.011093294 | -2.278310637 | 0.026527281  |
| NSA2    | 0.150568157  | 0.880664176 | -0.193254126 | 0.847439834 | 0.758706175  | 0.451196575  |
| NSD1    | -1.253582503 | 0.213344808 | 1.059111504  | 0.293970511 | 1.050055751  | 0.298184077  |
| NSDHL   | 0.728992104  | 0.467960199 | -0.195001831 | 0.84607776  | 1.057929579  | 0.294610768  |
| NSF     | -1.365322582 | 0.175664083 | 1.301749811  | 0.198184399 | 0.668555527  | 0.506514091  |
| NSFL1C  | -2.396345785 | 0.018696846 | 1.234331743  | 0.222091823 | 0.836487491  | 0.406421124  |
| NSL1    | -0.482665101 | 0.630543199 | -1.194275743 | 0.237265377 | -1.178943371 | 0.243384736  |
| NSMAF   | 0.202113976  | 0.840298471 | 0.007648081  | 0.993924203 | -0.475442364 | 0.636313277  |
| NSMCE1  | -0.09337307  | 0.925821415 | 2.395568359  | 0.019866084 | 3.023870815  | 0.003755579  |
| NSMCE2  | 0.620799399  | 0.536351114 | -0.252743806 | 0.80136605  | 0.232583204  | 0.1692946    |
| NSMCE4A | 1.764692665  | 0.081117365 | -0.867729396 | 0.389143519 | -0.424590404 | 0.672755323  |
| NSRP1   | -1.316770833 | 0.191366086 | 0.897009111  | 0.373448195 | 1.030627536  | 0.307127752  |
| NSUN2   | 2.713668358  | 0.008018512 | 1.827062523  | 0.072873048 | 2.470171892  | 0.016563475  |
| NSUN3   | -1.768138887 | 0.080535668 | -0.300755917 | 0.764683627 | -0.362514335 | 0.718326575  |
| NSUN4   | 0.006282035  | 0.995002046 | 1.733461928  | 0.088364345 | 2.873796409  | 0.005713914  |
| NSUN5   | -0.642874957 | 0.521992318 | 1.399623983  | 0.16698906  | 1.534245179  | 0.1305765    |
| NSUN5P1 | 0.911647622  | 0.364467967 | 1.063070819  | 0.292186732 | 2.466134233  | 0.016732462  |
| NSUN5P2 | 1.486814277  | 0.140671305 | 1.814808973  | 0.074761531 | 2.433921689  | 0.018137269  |
| NSUN6   | 1.910864858  | 0.059307968 | 0.704653606  | 0.483865514 | 2.039976991  | 0.046059766  |
| NSUN7   | 0.16208878   | 0.871610988 | -0.481661089 | 0.631871827 | -0.406661669 | 0.685800043  |
| NT5C    | 0.339409132  | 0.735117724 | -2.094341203 | 0.040640092 | -1.018135533 | 0.312973795  |
| NT5C2   | -3.105501368 | 0.002562743 | -1.901263891 | 0.062274203 | -2.655163934 | 0.0102924    |
| NT5C3   | -3.186536365 | 0.001998876 | -0.065658485 | 0.947877097 | -1.411089842 | 0.163726545  |
| NT5C3L  | 1.442233152  | 0.152819243 | -1.17873547  | 0.243350218 | -0.516440272 | 0.607517864  |
| NT5DC1  | 0.287120299  | 0.774701468 | -0.348243706 | 0.728926814 | -0.837344864 | 0.405943227  |
| NT5DC2  | 0.729234854  | 0.467812476 | 1.081643523  | 0.283918925 | 1.088356236  | 0.281080181  |
| NT5DC3  | 0.112027303  | 0.911059269 | 2.123574058  | 0.0380129   | 1.107366416  | 0.272849603  |
| NT5E    | 1.914885542  | 0.0587859   | -0.020438381 | 0.983764307 | 0.371519897  | 0.711646452  |
| NT5M    | -2.566640054 | 0.011975135 | 1.609885579  | 0.112890557 | 0.670816557  | 0.505083251  |
| NTAN1   | -2.702130806 | 0.008279386 | -0.821030293 | 0.415014399 | -0.458567185 | 0.648312319  |
| NTHL1   | 1.092841561  | 0.277473733 | 2.359032861  | 0.021736174 | 2.070880925  | 0.042971108  |
| NTN1    | 0.189232209  | 0.850350638 | -1.574491339 | 0.120851363 | -0.968989837 | 0.336699353  |
| NTN4    | 1.234505234  | 0.220331556 | -1.003352454 | 0.319887604 | -0.120767713 | 0.904305484  |
| NTN5    | 1.655034677  | 0.101512936 | -0.940717928 | 0.350778224 | 0.237138167  | 0.813411351  |
| NTNG2   | -1.53542721  | 0.128299959 | -1.184349915 | 0.241139006 | -2.778719975 | 0.007405483  |
| NTPCR   | 0.054024915  | 0.957038912 | 1.052367531  | 0.297026078 | 1.456976079  | 0.150684302  |
| NTRK1   | -3.593053629 | 0.000540299 | 1.759071563  | 0.083876537 | -1.603055338 | 0.114524842  |
| NTSR1   | 1.20645778   | 0.230904402 | 0.850269881  | 0.39869588  | 0.491448371  | 0.625022026  |
| NUAK1   | -1.448772356 | 0.150988173 | -0.701963709 | 0.485528858 | -0.271190481 | 0.787237513  |
| NUAK2   | -3.292531234 | 0.001435143 | -0.500891055 | 0.618356671 | -1.071490366 | 0.288525919  |
| NUB1    | -2.098508255 | 0.038752853 | 0.252473043  | 0.801574285 | -0.136297261 | 0.892073037  |
| NUBP1   | 0.316025339  | 0.752738565 | -0.201004484 | 0.841403214 | 0.391230274  | 0.697105432  |
| NUBP2   | -0.32837099  | 0.743418499 | 0.227613846  | 0.820752511 | 0.243543699  | 0.0808470472 |
| NUBPL   | 1.423940651  | 0.158032708 | -0.710500075 | 0.4802608   | -1.050626973 | 0.297923849  |
| NUCB1   | -2.20282871  | 0.030244271 | 1.505123423  | 0.137756942 | 1.070017804  | 0.28918243   |
| NUCB2   | 1.756624761  | 0.082492745 | 0.465109701  | 0.643606623 | 0.506243563  | 0.614664618  |
| NUCKS1  | 2.18428701   | 0.031625188 | 0.458175207  | 0.64855059  | 1.72193837   | 0.090577294  |
| NUDC    | -0.919505065 | 0.360368405 | 2.840481667  | 0.006216466 | 3.167672088  | 0.002483954  |
| NUDCD1  | 0.447180184  | 0.655853897 | -0.55505878  | 0.581003816 | -0.670054831 | 0.505565047  |
| NUDCD2  | 1.553109128  | 0.124019573 | -0.4116386   | 0.682132177 | -0.34946273  | 0.728047203  |
| NUDCD3  | 1.702745402  | 0.09217837  | 2.527166256  | 0.014267222 | 3.3736745    | 0.001348682  |
| NUDT1   | -0.358767744 | 0.72063614  | 0.032386096  | 0.97427612  | 0.848798542  | 0.399592081  |
| NUDT11  | 0.893242798  | 0.37418606  | -0.644523663 | 0.521794696 | -0.716709079 | 0.476519711  |
| NUDT12  | -0.278642832 | 0.781178737 | 0.201503605  | 0.841014781 | -0.112730019 | 0.910646046  |
| NUDT13  | 2.075917748  | 0.040846697 | 0.778923021  | 0.439213667 | 1.505830088  | 0.137707419  |
| NUDT14  | 0.672832106  | 0.502833513 | -0.466647362 | 0.642512522 | 0.216205117  | 0.829610201  |

|          |              |             |              |             |              |             |
|----------|--------------|-------------|--------------|-------------|--------------|-------------|
| NUDT15   | 1.010296449  | 0.315148841 | -1.016593161 | 0.313598439 | 0.66836168   | 0.506636865 |
| NUDT16   | -0.173866397 | 0.862373511 | -0.165255839 | 0.86932128  | -0.94208098  | 0.350180742 |
| NUDT16L1 | -0.509471412 | 0.611708922 | -1.626141575 | 0.109379155 | -0.692987144 | 0.491169704 |
| NUDT16P1 | -1.597852815 | 0.113693765 | -1.495373453 | 0.140276365 | -0.540539568 | 0.590959513 |
| NUDT17   | 0.994431542  | 0.322764664 | 0.561029695  | 0.576953543 | 0.565174779  | 0.574202768 |
| NUDT18   | -0.374240678 | 0.709133871 | 1.11284262   | 0.270399095 | 0.462786594  | 0.645303154 |
| NUDT19   | -0.166133349 | 0.868436656 | 0.284066305  | 0.777378294 | -0.364725002 | 0.71668468  |
| NUDT2    | -0.123768602 | 0.901783375 | 0.369969437  | 0.712762216 | 0.635966307  | 0.527378197 |
| NUDT21   | 0.762485785  | 0.447828035 | -0.36191028  | 0.718743502 | -1.334939926 | 0.187275222 |
| NUDT22   | 0.138311587  | 0.89031311  | 0.993829894  | 0.324462685 | 1.404264215  | 0.165739118 |
| NUDT3    | -0.042839364 | 0.96592754  | -1.118230927 | 0.268110754 | -2.165374619 | 0.034616124 |
| NUDT4    | -0.578490022 | 0.564424664 | 0.736262445  | 0.464559191 | 0.029706919  | 0.97640597  |
| NUDT5    | -2.05593341  | 0.042779574 | 0.511265144  | 0.611119834 | -0.627180439 | 0.533079151 |
| NUDT6    | 0.838802765  | 0.403873853 | -0.074132704 | 0.941161666 | -1.012927609 | 0.315433098 |
| NUDT7    | 2.37596657   | 0.019693379 | 0.339400219  | 0.735542711 | 1.542616044  | 0.128532819 |
| NUDT8    | 0.780182598  | 0.437396299 | -0.647816339 | 0.519677818 | -0.692171586 | 0.491677751 |
| NUDT9    | 2.070137809  | 0.041397838 | 1.832064304  | 0.072113783 | 1.761271238  | 0.083628441 |
| NUF2     | 0.117315625  | 0.906879769 | -0.195948332 | 0.845340302 | -0.067855157 | 0.946141619 |
| NUFIP1   | 0.840637476  | 0.402850531 | 1.003895211  | 0.319628148 | 2.758362064  | 0.007823037 |
| NUFIP2   | 0.701721137  | 0.484722018 | -0.625390395 | 0.534185038 | -1.870494771 | 0.066622389 |
| NUMA1    | 0.822725196  | 0.412908757 | 1.37326249   | 0.174993232 | 1.717635476  | 0.091365629 |
| NUMB     | -1.201287106 | 0.232892949 | -1.249066521 | 0.21669341  | -2.123689416 | 0.038108314 |
| NUMBL    | 1.060718107  | 0.291747507 | -0.778690009 | 0.439349855 | -0.292694118 | 0.770833211 |
| NUP107   | 3.300520675  | 0.001399347 | 2.095837425  | 0.040501885 | 2.366898274  | 0.021404863 |
| NUP133   | 1.647345129  | 0.103086711 | 2.951413369  | 0.004569134 | 3.223965045  | 0.002106597 |
| NUP153   | -0.394392109 | 0.694254602 | 0.455568855  | 0.65041293  | -0.451516174 | 0.653354072 |
| NUP155   | 0.101581326  | 0.919322248 | -0.021977881 | 0.982541563 | 0.709725894  | 0.480806634 |
| NUP160   | 0.971679897  | 0.333897802 | 1.706603106  | 0.093282618 | 0.647070088  | 0.520219149 |
| NUP188   | 1.005473673  | 0.317451165 | 1.203931856  | 0.233540496 | 1.943895006  | 0.056917672 |
| NUP205   | 2.095453959  | 0.03903041  | 0.60980479   | 0.5443895   | 1.56097329   | 0.124140422 |
| NUP210   | 1.360264568  | 0.177252799 | -0.464667739 | 0.643921242 | 0.371637436  | 0.711559413 |
| NUP210L  | 0.842315309  | 0.401916094 | -0.537664826 | 0.592879909 | 0.178017282  | 0.859349106 |
| NUP214   | -2.960484085 | 0.003955696 | 0.413940751  | 0.680454915 | -0.474885473 | 0.636707716 |
| NUP35    | 1.418259947  | 0.159679325 | -1.496610788 | 0.139954633 | -0.4510096   | 0.653716923 |
| NUP37    | 1.114126102  | 0.268286946 | -0.007018828 | 0.994424086 | 1.823250601  | 0.073581934 |
| NUP43    | 2.367733918  | 0.020109152 | 0.275971757  | 0.783557549 | 2.413667917  | 0.019073981 |
| NUP50    | -1.205966978 | 0.231092626 | 0.353345007  | 0.725119845 | -0.490325436 | 0.625811289 |
| NUP54    | 0.976882238  | 0.331330157 | -0.577060209 | 0.566147566 | -0.404425631 | 0.687433822 |
| NUP62    | -0.372468044 | 0.710448255 | 1.480450602  | 0.144202745 | 1.113646476  | 0.270168177 |
| NUP85    | 2.200585277  | 0.030408502 | 2.386794109  | 0.020301552 | 3.549264756  | 0.000788501 |
| NUP88    | 3.01750958   | 0.003340447 | 1.600975685  | 0.114853501 | 1.861963811  | 0.067836264 |
| NUP93    | -0.599423193 | 0.550445212 | 2.3609688    | 0.021633268 | 2.110556214  | 0.039270513 |
| NUP98    | -2.237115716 | 0.027829075 | 1.1225153    | 0.266301008 | 1.03998839   | 0.302795999 |
| NUPL1    | -0.35369667  | 0.724420062 | -1.474710379 | 0.145735895 | -2.201474896 | 0.031821894 |
| NUPL2    | 1.202067528  | 0.232592024 | -2.300599259 | 0.025055114 | -1.81793939  | 0.074401214 |
| NUS1     | 1.302757954  | 0.196087791 | 0.051068292  | 0.9594478   | -0.36127309  | 0.719249053 |
| NUSAP1   | -0.206053019 | 0.837229876 | -0.471375545 | 0.639153244 | -0.757730678 | 0.451775769 |
| NUTF2    | -1.67006082  | 0.098493813 | -0.901547807 | 0.371051722 | -0.329967091 | 0.742650847 |
| NVL      | 1.671907304  | 0.098127894 | 0.700995665  | 0.486128241 | 2.477572725  | 0.016257721 |
| NXF1     | 1.250343939  | 0.214519279 | -1.179814233 | 0.242924223 | -0.781794912 | 0.437614329 |
| NXN      | 1.245781533  | 0.21618188  | 1.367486206  | 0.176785725 | 2.109182731  | 0.039393824 |
| NXPH4    | 0.267257018  | 0.789902429 | -0.848198506 | 0.3998387   | 0.138212871  | 0.890565897 |
| NXT1     | 1.230223111  | 0.221922509 | -1.130219987 | 0.263068244 | -0.719898875 | 0.474568697 |
| NXT2     | -0.557527346 | 0.578595792 | -1.591930331 | 0.116874383 | -1.512195821 | 0.136083674 |
| NYNRIN   | 0.648357285  | 0.518457817 | 2.346401895  | 0.022418373 | 2.284780625  | 0.026119301 |
| O3FAR1   | -1.357340647 | 0.178176152 | 0.554330328  | 0.581498883 | 1.060412562  | 0.293490074 |
| OAF      | -2.193941495 | 0.030899441 | 0.402901136  | 0.68851259  | -0.68338961  | 0.497166735 |
| OAS1     | -1.40066396  | 0.164863528 | -0.305294743 | 0.761242277 | -1.881218104 | 0.065122661 |
| OAS2     | -1.293913996 | 0.199112181 | 2.143803217  | 0.036282791 | -0.564794244 | 0.574459841 |
| OAS3     | -0.970770099 | 0.334348176 | 1.20277697   | 0.233983745 | -1.874308852 | 0.066085651 |
| OASL     | -3.628020622 | 0.000480566 | 0.051891647  | 0.958794584 | -2.257011661 | 0.027910542 |
| OAT      | 0.947291619  | 0.346108318 | 0.913686394  | 0.364690697 | 0.455031479  | 0.650838439 |
| OAZ1     | -4.000319595 | 0.000132261 | -0.687390802 | 0.494595239 | -1.280656072 | 0.205571171 |
| OAZ2     | -3.716518867 | 0.00035613  | -0.646203466 | 0.520714173 | -0.8925617   | 0.375895429 |
| OBFC1    | -0.242718662 | 0.80879342  | -2.196939653 | 0.032062399 | -1.171581197 | 0.246305109 |
| OBFC2A   | 0.327246062  | 0.74426618  | -1.386460997 | 0.170949754 | -2.95362611  | 0.004577915 |
| OBFC2B   | -0.563480457 | 0.57455413  | -0.548620094 | 0.585386637 | 0.006573802  | 0.994778167 |
| OBSCN    | 2.4540711    | 0.016113354 | 0.26344137   | 0.793150609 | 1.03780798   | 0.303801243 |
| OBSL1    | -0.299971502 | 0.764912899 | -0.388854517 | 0.698817611 | -0.739214925 | 0.462850913 |
| OCEL1    | -0.46225065  | 0.645053036 | 0.979459713  | 0.331449167 | 1.898303445  | 0.062792271 |
| OCIAD1   | 0.657426457  | 0.51263859  | -0.841566491 | 0.403511294 | -0.368062416 | 0.71420848  |
| OCIAD2   | 1.017217872  | 0.311864202 | -2.356784605 | 0.021856229 | -0.9217362   | 0.360603708 |



|         |              |             |              |             |              |             |
|---------|--------------|-------------|--------------|-------------|--------------|-------------|
| OCLM    | 1.58399626   | 0.116815236 | 0.184910119  | 0.853949111 | -0.50731639  | 0.613916607 |
| OCLN    | 1.953528117  | 0.053963391 | 0.286990341  | 0.775149655 | 1.449266485  | 0.15281694  |
| OCM     | 1.641059301  | 0.104387806 | 1.473780897  | 0.145985349 | 2.953636303  | 0.004577785 |
| OCRL    | 1.426358686  | 0.157335795 | -0.358917736 | 0.72096902  | 0.373220896  | 0.710387219 |
| ODC1    | -7.02356042  | 4.51E-10    | 1.785604605  | 0.079428294 | 1.128565597  | 0.263872656 |
| ODF2    | 0.176713353  | 0.860143392 | 1.891795768  | 0.063549307 | 2.011539197  | 0.049069972 |
| ODF2L   | 1.457526471  | 0.148563577 | -1.367558984 | 0.176763054 | -1.742577977 | 0.086873648 |
| ODF3B   | -1.077630266 | 0.284171312 | -1.714820198 | 0.091754551 | -3.08295545  | 0.003173207 |
| ODZ1    | 1.591316699  | 0.115157732 | -0.530719231 | 0.597653865 | -0.701758435 | 0.485724031 |
| ODZ4    | -0.700570713 | 0.485436319 | -0.136752483 | 0.891703341 | 0.680819319  | 0.498779559 |
| ODF1    | 2.701452196  | 0.008294968 | 0.342434172  | 0.733270683 | 2.053033879  | 0.044732126 |
| OGDH    | -1.335451193 | 0.185204676 | 0.366204493  | 0.715554226 | 0.406394789  | 0.685994962 |
| OGFOD1  | -0.44300084  | 0.658862331 | 1.63269096   | 0.107989718 | 2.191662145  | 0.032561064 |
| OGFOD2  | 0.105011859  | 0.916607604 | -0.053678346 | 0.957377189 | 0.56230294   | 0.576144237 |
| OGFR    | -1.664731197 | 0.09955621  | 0.196005871  | 0.845295475 | 0.157259533  | 0.875603573 |
| OGFRL1  | -1.703407705 | 0.0920539   | -1.557352519 | 0.124865053 | -2.517831976 | 0.014681949 |
| OGG1    | 0.748339042  | 0.456269587 | -1.690733549 | 0.096293061 | -1.001477723 | 0.320885719 |
| OGT     | 2.791499485  | 0.006445541 | -1.042111396 | 0.301714584 | -0.933225746 | 0.354693056 |
| OIP5    | -0.684589407 | 0.495418844 | -0.914100546 | 0.364474908 | -1.929941815 | 0.058663615 |
| OLA1    | 0.849983216  | 0.397662464 | 0.736865295  | 0.464195299 | 1.73807571   | 0.087670665 |
| OLAH    | -2.347528007 | 0.021162813 | 0.093981527  | 0.925450009 | -0.633448259 | 0.529008832 |
| OLFM1   | -0.037118473 | 0.970475398 | 0.420087717  | 0.675984421 | 0.249628028  | 0.803784599 |
| OLFM2   | 0.389924543  | 0.697543252 | -0.307473307 | 0.759592199 | 0.387841367  | 0.699597608 |
| OLFM4   | -4.112428118 | 8.84E-05    | 2.070617089  | 0.04288694  | 0.132957292  | 0.894701772 |
| OLFML2A | 2.013201604  | 0.047177871 | -0.017463186 | 0.986127456 | 0.92803995   | 0.357353006 |
| OLFML2B | -0.933904078 | 0.35293258  | 0.112627619  | 0.910717415 | -0.791583166 | 0.431929943 |
| OLIG1   | 3.304676188  | 0.001381061 | -2.274187879 | 0.026697744 | -1.647172476 | 0.105099828 |
| OLIG2   | 3.303037904  | 0.001388243 | -0.934644458 | 0.353873639 | -1.562224304 | 0.123845519 |
| OLR1    | -0.737872999 | 0.462572968 | 0.279751746  | 0.780670192 | -0.983013472 | 0.329811164 |
| OMA1    | -0.32204338  | 0.748190705 | -0.486484351 | 0.62846983  | -1.175539559 | 0.244731816 |
| OMG     | 0.155178169  | 0.877039542 | -0.698895206 | 0.487430191 | -0.850101162 | 0.398873676 |
| OPA1    | 1.806702302  | 0.074258498 | 1.139969482  | 0.259017489 | 1.183147825  | 0.241728194 |
| OPA3    | 0.468807231  | 0.6403775   | 1.181939177  | 0.242086674 | 1.671774428  | 0.100124685 |
| OPHN1   | -0.213522647 | 0.831417833 | -0.00574654  | 0.995434807 | -0.011832067 | 0.990601473 |
| OPLAH   | -1.161840128 | 0.248471059 | -0.357647627 | 0.721914319 | -1.349251235 | 0.182663649 |
| OPN3    | 0.619175706  | 0.537415156 | -0.652012879 | 0.516986445 | -1.179525716 | 0.243154806 |
| OPRL1   | -1.473951747 | 0.144096072 | 1.277735817  | 0.206468613 | 0.786690501  | 0.434765779 |
| OPTN    | -2.679614692 | 0.008810859 | 1.699309202  | 0.094656505 | 2.078707251  | 0.042218039 |
| OR13A1  | -0.555557694 | 0.579936006 | 2.189542623  | 0.032622783 | 1.965509376  | 0.054300805 |
| OR2W3   | -3.54633322  | 0.000631152 | 0.462062559  | 0.645777115 | 0.178825819  | 0.858717166 |
| OR52N4  | 0.953769422  | 0.342837178 | -2.628904843 | 0.010964455 | -2.370698517 | 0.021206374 |
| OR7D2   | -0.269016751 | 0.788552358 | -0.526423024 | 0.600615747 | -0.775602727 | 0.441233068 |
| ORAI1   | -1.629796719 | 0.106752191 | -2.277179297 | 0.026507021 | -2.213969816 | 0.030902088 |
| ORAI2   | -2.73565625  | 0.007541975 | -0.0061733   | 0.995095783 | 0.254768358  | 0.799831379 |
| ORAI3   | -1.887485134 | 0.062421855 | -1.382517082 | 0.172150414 | -1.564797604 | 0.123240675 |
| ORAOV1  | 1.804498509  | 0.074605928 | -0.731865216 | 0.467218361 | 0.134923834  | 0.893153853 |
| ORC1    | 0.084511949  | 0.932843153 | 1.670464374  | 0.100253642 | 2.902543057  | 0.005277713 |
| ORC2    | 1.318868282  | 0.190666725 | -0.433062584 | 0.666586769 | -0.958203278 | 0.342061733 |
| ORC3    | 0.446053801  | 0.656664149 | -1.92571443  | 0.059081454 | -0.639531257 | 0.52507412  |
| ORC4    | -0.424724179 | 0.672084036 | -1.41500281  | 0.162451699 | -1.62993061  | 0.108705255 |
| ORC5    | 1.105317715  | 0.272062701 | 0.099736524  | 0.920899843 | 2.028612366  | 0.047242935 |
| ORC6    | 1.133802022  | 0.259985467 | 1.569935658  | 0.121908001 | 1.069637283  | 0.289352245 |
| ORM1    | -2.001237546 | 0.048476581 | -0.010062146 | 0.992006476 | 0.434685388  | 0.665454282 |
| ORM2    | -0.455995422 | 0.649527026 | 0.874351294  | 0.38555827  | 0.510653983  | 0.611592167 |
| ORMDL1  | 2.281927188  | 0.024928537 | -1.465717746 | 0.148163436 | -1.474870591 | 0.145824112 |
| ORMDL2  | -2.150278694 | 0.034301387 | -3.320170197 | 0.001564926 | -1.895297715 | 0.063197037 |
| ORMDL3  | -0.218763134 | 0.827345834 | -0.10700925  | 0.915153509 | 0.308952078  | 0.758499686 |
| OS9     | -2.05560956  | 0.042811533 | 1.950765459  | 0.055955967 | 2.014213558  | 0.04877961  |
| OSBP    | -0.047246655 | 0.962424698 | 1.141762889  | 0.258277212 | 0.860743009  | 0.393034563 |
| OSBP2   | -3.260817143 | 0.001585876 | 1.207924255  | 0.232012908 | -0.129194117 | 0.897665014 |
| OSBPL10 | 1.405368314  | 0.163465047 | 1.650872842  | 0.104207503 | 1.401565616  | 0.166540065 |
| OSBPL11 | -0.091322592 | 0.927445754 | -0.668587827 | 0.506429262 | -2.209669657 | 0.031215962 |
| OSBPL1A | -1.746521309 | 0.0842422   | 1.228202678  | 0.224366222 | -0.297214258 | 0.767398038 |
| OSBPL2  | -2.512916226 | 0.013812981 | 0.160676098  | 0.872910746 | 0.252127646  | 0.801861593 |
| OSBPL3  | 2.230938576  | 0.028251282 | -1.941573035 | 0.057086051 | -1.32644909  | 0.190052668 |
| OSBPL5  | 0.161805613  | 0.871833308 | -2.334351577 | 0.023086948 | -1.617796566 | 0.111302335 |
| OSBPL6  | -3.550158069 | 0.000623202 | 1.623315627  | 0.109983136 | 1.982038864  | 0.052369753 |
| OSBPL7  | -0.532651289 | 0.59562993  | -0.073320429 | 0.941805173 | 0.977854837  | 0.332334033 |
| OSBPL8  | 0.90066001   | 0.370250177 | -1.661012817 | 0.102145516 | -2.419946613 | 0.018779056 |
| OSBPL9  | -0.384706979 | 0.701391312 | 1.080383994  | 0.284474427 | 0.995267158  | 0.323869592 |
| OSCAR   | -1.744621404 | 0.084574564 | 0.811273335  | 0.420548659 | 0.420843139  | 0.675473605 |
| OSCP1   | -1.329023591 | 0.187307649 | -1.189675883 | 0.239054861 | -1.012925216 | 0.315434231 |

|               |              |             |              |             |              |             |
|---------------|--------------|-------------|--------------|-------------|--------------|-------------|
| OSGEP         | 1.84615968   | 0.06826229  | 1.894515369  | 0.063180803 | 2.99096814   | 0.004122049 |
| OSGEPL1       | 2.881976801  | 0.004974698 | -0.827741886 | 0.411233273 | 0.644870085  | 0.521633482 |
| OSGIN1        | -1.831183937 | 0.070488643 | 1.722247561  | 0.090391161 | 0.574291192  | 0.568060902 |
| OSGIN2        | -1.921391985 | 0.057949292 | -1.433032659 | 0.157254408 | -2.109717915 | 0.039345735 |
| OSM           | -2.44270934  | 0.016595076 | -0.008053618 | 0.993602043 | -1.766657164 | 0.082712351 |
| OSMR          | 0.39775742   | 0.691781198 | -0.067703638 | 0.946256039 | 0.711665265  | 0.47961391  |
| OSt4          | -2.941169799 | 0.004186758 | -2.786295201 | 0.007206876 | -1.965497041 | 0.054302269 |
| OSTC          | 0.221009621  | 0.825601691 | -0.599987518 | 0.550867888 | -0.312268654 | 0.755991298 |
| OSTCL         | 0.270496574  | 0.787417534 | -2.104009956 | 0.039754176 | -1.165218789 | 0.248849147 |
| OSTF1         | -3.62945166  | 0.00047826  | -0.386984791 | 0.700193655 | -0.505157909 | 0.615421991 |
| OSTM1         | -0.346871138 | 0.72952394  | 0.135879233  | 0.892390551 | -0.945428547 | 0.348484665 |
| OSTAlpha      | -1.866069368 | 0.065393783 | 0.996631924  | 0.323111941 | 1.094956239  | 0.278203267 |
| OTOF          | -2.074823899 | 0.040950512 | 1.086215061  | 0.281909032 | 0.010331585  | 0.991793299 |
| OTUB1         | -1.091828536 | 0.277916344 | -2.398077129 | 0.019743122 | -2.068148036 | 0.043236807 |
| OTUB2         | -0.009504045 | 0.992438696 | 1.720034431  | 0.09079565  | 0.59536283   | 0.553989362 |
| OTUD1         | -1.92844818  | 0.057053395 | 0.535673484  | 0.594246795 | -1.411658462 | 0.163559742 |
| OTUD3         | 1.746138341  | 0.084309109 | -1.900645805 | 0.062356775 | -0.74884176  | 0.457073345 |
| OTUD4         | 0.891143025  | 0.375305053 | -0.503434688 | 0.616578708 | -1.569594612 | 0.122119483 |
| OTUD5         | -2.101674323 | 0.03846694  | -0.043257    | 0.965646284 | 0.300607399  | 0.764822426 |
| OTUD6B        | 1.403632384  | 0.16398003  | -0.747750881 | 0.457652638 | -1.426512673 | 0.159248733 |
| OTUD7A        | -0.244390151 | 0.807502873 | -1.086213234 | 0.281909834 | -2.805778422 | 0.006882245 |
| OTUD7B        | 0.627462898  | 0.531995698 | 0.257552865  | 0.797669972 | 1.195100732  | 0.237063332 |
| OTX1          | -3.040579679 | 0.003117734 | -2.254545724 | 0.027980548 | -2.304534856 | 0.024907904 |
| OVCA2         | 0.378553573  | 0.705939601 | -4.648146423 | 2.00E-05    | -3.956790321 | 0.000215319 |
| OVGP1         | 3.586022307  | 0.000553132 | 2.531308195  | 0.014116854 | 3.395492297  | 0.001262665 |
| OXA1L         | -0.214516865 | 0.830644942 | -2.217885879 | 0.030521234 | -1.470987212 | 0.146868243 |
| OXCT1         | 1.543432977  | 0.126347688 | -1.007013609 | 0.318140192 | 0.001924701  | 0.998471123 |
| OXER1         | -1.961449166 | 0.053017481 | -0.186310054 | 0.852856276 | -0.337361743 | 0.737100177 |
| OXNAD1        | 1.853804276  | 0.067148677 | 0.302556828  | 0.763317596 | 0.086679607  | 0.931234081 |
| OXR1          | 1.123059577  | 0.26449513  | -0.058602066 | 0.953471912 | -1.166872075 | 0.248186266 |
| OXSM          | 1.394349125  | 0.166755145 | 0.076961973  | 0.938920523 | -0.107329559 | 0.914909527 |
| OXSRI         | -2.179180047 | 0.032015069 | 1.003721681  | 0.319711086 | 0.911388465  | 0.365980972 |
| OXTR          | -0.680840867 | 0.497776369 | 1.054217696  | 0.296185642 | 0.166962202  | 0.867998693 |
| P2RX1         | -1.953627168 | 0.053951474 | 0.579297299  | 0.564647531 | 1.042581148  | 0.301603608 |
| P2RX4         | 1.531606713  | 0.129239988 | -0.630325533 | 0.530974603 | 0.39627765   | 0.693399851 |
| P2RX5         | 0.081461543  | 0.935261617 | 1.052123038  | 0.297137261 | 1.710195664  | 0.092742035 |
| P2RX5-TAX1BP. | 0.393095003  | 0.695208824 | -0.038169299 | 0.96968469  | -0.262827359 | 0.793644151 |
| P2RX6         | -1.823046027 | 0.071723657 | 1.77954477   | 0.080426491 | 1.582944142  | 0.119042383 |
| P2RX7         | 3.898112823  | 0.000189914 | -0.889848491 | 0.37724901  | -0.88142296  | 0.381840685 |
| P2RY1         | 0.294781758  | 0.768861352 | -0.943925164 | 0.349150747 | -2.909340439 | 0.005179186 |
| P2RY10        | -0.820079923 | 0.414406873 | -1.784280284 | 0.079645553 | -2.270277031 | 0.027041717 |
| P2RY11        | 1.539112526  | 0.127398321 | -0.562091564 | 0.576234675 | -0.080354078 | 0.936240926 |
| P2RY12        | -2.449401591 | 0.0163098   | 0.414905333  | 0.679752637 | -1.870621501 | 0.066604496 |
| P2RY13        | -2.159773498 | 0.033535091 | -2.077586511 | 0.042215963 | -2.480602944 | 0.016134008 |
| P2RY14        | -1.092095129 | 0.277799817 | -2.822237666 | 0.006534952 | -3.804677928 | 0.000352378 |
| P2RY2         | -0.864958038 | 0.389435442 | 0.132165448  | 0.895314057 | -0.956616666 | 0.342855201 |
| P2RY6         | -0.729595388 | 0.467593126 | -0.882194605 | 0.381338607 | -1.091406226 | 0.279748135 |
| P2RY8         | -0.845562303 | 0.400111504 | 1.923378302  | 0.059380359 | 1.883244442  | 0.0648425   |
| P4HA1         | -0.670235754 | 0.504478892 | 0.358506831  | 0.721274795 | -0.125577213 | 0.900514461 |
| P4HB          | -0.899905345 | 0.370649435 | 2.044704129  | 0.045463461 | 2.150159243  | 0.035856868 |
| P4HTM         | 2.478787636  | 0.015108351 | -0.337203394 | 0.737189325 | -0.201644298 | 0.840922436 |
| PA2G4         | -0.880569811 | 0.380971535 | 1.952425235  | 0.055753971 | 3.198002789  | 0.002273386 |
| PA2G4P4       | 0.745153113  | 0.458183157 | -1.48464429  | 0.143090699 | -0.130283294 | 0.89680721  |
| PAAF1         | 1.432852803  | 0.155475823 | 1.928733332  | 0.058697086 | 2.931208794  | 0.004873665 |
| PABPC1        | -0.035763809 | 0.971552445 | 1.289148112  | 0.202500025 | 1.255731193  | 0.214405759 |
| PABPC1L       | 2.258657354  | 0.026399702 | -0.268456948 | 0.789306816 | -0.000497715 | 0.999604643 |
| PABPC4        | 0.446552361  | 0.656305464 | 0.644560592  | 0.521770929 | 0.51972617   | 0.605294232 |
| PABPN1        | 0.974465857  | 0.332521156 | -3.402398944 | 0.001220657 | -2.989321578 | 0.004141225 |
| PABPN1L       | -0.189870854 | 0.84985168  | -0.348496396 | 0.728738076 | 0.18995748   | 0.850026458 |
| PACRGL        | 1.372477437  | 0.173435234 | -1.236806056 | 0.221178461 | -2.716126613 | 0.008759192 |
| PACS1         | -1.248695813 | 0.215118793 | 0.091247098  | 0.927612861 | 0.734449897  | 0.465726059 |
| PACS2         | 2.053588212  | 0.043011477 | 0.253078582  | 0.801108603 | 0.699847631  | 0.486907492 |
| PAC SIN1      | 1.959612576  | 0.053235537 | -0.264816532 | 0.792096207 | -0.520455074 | 0.604789522 |
| PAC SIN2      | -0.739211079 | 0.461764338 | -0.647811069 | 0.519681202 | -0.783057788 | 0.436878458 |
| PADI2         | -2.630549698 | 0.010077881 | 0.87935618   | 0.382862296 | -0.138958475 | 0.889979389 |
| PADI4         | -3.713451107 | 0.000359876 | 0.517589125  | 0.606727286 | 0.892363827  | 0.376000528 |
| PADI6         | -0.43251058  | 0.66643827  | 1.382722231  | 0.1720878   | 0.90317197   | 0.370287128 |
| PAF1          | -1.847400301 | 0.068080522 | 1.715359233  | 0.091655037 | 2.004476299  | 0.049843049 |
| PAFAH1B1      | 0.101611326  | 0.919298504 | 1.836419733  | 0.071458059 | 2.061380283  | 0.043900928 |
| PAFAH1B2      | -0.939200507 | 0.350222453 | 0.05182502   | 0.958847442 | 0.692614889  | 0.491401562 |
| PAFAH1B3      | -0.296205593 | 0.767777461 | 2.394781264  | 0.019904804 | 2.640753371  | 0.010688975 |
| PAFAH2        | -0.189970584 | 0.849773769 | -0.710555814 | 0.480226925 | 0.680007635  | 0.499289473 |

|          |              |             |              |             |              |             |
|----------|--------------|-------------|--------------|-------------|--------------|-------------|
| PAG1     | 2.033674812  | 0.045024518 | -0.166116585 | 0.868646958 | -0.762574117 | 0.448904267 |
| PAICS    | 1.790299845  | 0.076876884 | 2.235518022  | 0.029274908 | 4.231905948  | 8.64E-05    |
| PAIP1    | 0.78786231   | 0.432913971 | -1.028877654 | 0.307838619 | -1.134536526 | 0.2613824   |
| PAIP2    | -1.425487416 | 0.157586635 | 0.268601246  | 0.789196308 | 0.044343557  | 0.964787634 |
| PAIP2B   | 2.350565857  | 0.021001339 | 1.472035384  | 0.146454717 | 1.776742278  | 0.081019436 |
| PAK1     | -2.899234022 | 0.004731932 | 1.461560741  | 0.149296271 | 1.326554907  | 0.190017863 |
| PAK1IP1  | 1.560155253  | 0.122345777 | 0.803684081  | 0.424883968 | 1.330690458  | 0.188661399 |
| PAK2     | -2.694564591 | 0.008454635 | 0.447903987  | 0.655902735 | -0.461308371 | 0.646356706 |
| PAK4     | 0.79317187   | 0.429830873 | -0.928129083 | 0.35721391  | -1.127089626 | 0.264490811 |
| PAK6     | 1.30917252   | 0.193915703 | -1.774745119 | 0.081224507 | -0.896258005 | 0.373935578 |
| PALB2    | 0.382900528  | 0.702725431 | -0.017862726 | 0.9858101   | 1.000354145  | 0.321424172 |
| PALLD    | -2.58061272  | 0.011534763 | -1.006136465 | 0.318558254 | -1.428920492 | 0.158558322 |
| PALM     | 0.159946297  | 0.873293346 | 0.356658272  | 0.722650964 | -0.426976328 | 0.671026847 |
| PAM      | 0.670870356  | 0.504076461 | 1.484399331  | 0.143155469 | 1.099974917  | 0.276029465 |
| PAM16    | 0.372781245  | 0.710215957 | -3.103036048 | 0.002966768 | -2.128714004 | 0.037671679 |
| PAN2     | 0.855156324  | 0.394808432 | 0.317344274  | 0.752129944 | 0.589094416  | 0.55815702  |
| PAN3     | 0.11415948   | 0.909373846 | -1.865984368 | 0.067138308 | -2.296735593 | 0.025380084 |
| PAN3-AS1 | 1.293546834  | 0.199238486 | -3.510438153 | 0.00087633  | -1.974223814 | 0.053275272 |
| PANK1    | 0.289236548  | 0.773086998 | 0.601751055  | 0.549701273 | 0.743855501  | 0.460060653 |
| PANK2    | -3.536345843 | 0.000652365 | 0.059197498  | 0.952999719 | -1.149109096 | 0.255374892 |
| PANK3    | -0.161671942 | 0.871938259 | -0.917143443 | 0.362891954 | -1.42659175  | 0.159226022 |
| PANK4    | 0.387163573  | 0.699578546 | 0.165842466  | 0.868861696 | -0.643063946 | 0.522796124 |
| PANX1    | -1.751559193 | 0.083366088 | 0.361712601  | 0.718890438 | 0.367362545  | 0.714727496 |
| PANX2    | -1.409921562 | 0.162120166 | -1.549223506 | 0.126805706 | -1.56524029  | 0.123136863 |
| PAOX     | -0.360081106 | 0.719657267 | 0.90665026   | 0.368369303 | 1.85127607   | 0.069383338 |
| PAPD4    | 0.958598156  | 0.3404119   | -0.855691124 | 0.395714437 | -1.445667774 | 0.153820459 |
| PAPD5    | 0.349114441  | 0.727845124 | -1.315105217 | 0.193686396 | -2.114143445 | 0.038950039 |
| PAPD7    | 3.724985055  | 0.000345984 | -0.144345072 | 0.885731878 | 0.743826858  | 0.460077846 |
| PAPLN    | -0.15385703  | 0.878078026 | -0.175681807 | 0.861160129 | -0.560524201 | 0.577348323 |
| PAPOLA   | 0.510427052  | 0.61104218  | -1.275792482 | 0.207150137 | -1.829928638 | 0.072562578 |
| PAPOLG   | 0.193800057  | 0.846783239 | -0.870808079 | 0.387474066 | -1.785708559 | 0.07953868  |
| PAPSS1   | 0.965741677  | 0.336844557 | 0.354203676  | 0.724479725 | -0.047773928 | 0.962065675 |
| PAPSS2   | -2.030695994 | 0.04533249  | 0.23405192   | 0.815774631 | -0.515712368 | 0.608076945 |
| PAQR3    | 1.15485662   | 0.251304472 | -1.214062389 | 0.22967853  | -1.916911474 | 0.060335116 |
| PAQR4    | 0.349113329  | 0.727845955 | -0.061489008 | 0.951182645 | 0.454165033  | 0.65145811  |
| PAQR5    | -2.608789464 | 0.010690912 | -1.074387554 | 0.287129438 | 0.735005586  | 0.46539024  |
| PAQR6    | -1.152178317 | 0.252397198 | -1.236546072 | 0.221274301 | -1.878115906 | 0.065553556 |
| PAQR7    | 0.492147551  | 0.623851954 | -0.89542198  | 0.37428853  | 1.108302931  | 0.272448553 |
| PAQR8    | -0.557444118 | 0.578652393 | -0.587234528 | 0.559341272 | -0.991517021 | 0.32568031  |
| PAR-SN   | 1.862549097  | 0.065893484 | -0.356272826 | 0.722938028 | -0.338778744 | 0.736038125 |
| PAR5     | 2.528478106  | 0.013256146 | 0.655650337  | 0.514659638 | 0.705598382  | 0.48335059  |
| PARD3    | -1.558658044 | 0.122699926 | 2.086258621  | 0.0413938   | 2.005449708  | 0.049735849 |
| PARD6A   | -1.503311065 | 0.136372471 | -1.05321882  | 0.296639178 | -0.882813419 | 0.381095314 |
| PARD6B   | 0.37077429   | 0.711704969 | -1.185792385 | 0.24057325  | 0.649849582  | 0.518435183 |
| PARD6G   | 1.01735903   | 0.311797453 | 0.010158569  | 0.991929879 | -1.600729991 | 0.115039992 |
| PARG     | 0.195337943  | 0.845582894 | 1.62551586   | 0.109512654 | 2.652818902  | 0.010356005 |
| PARK2    | 0.797683841  | 0.427221136 | -0.159996516 | 0.873443613 | -0.364404187 | 0.716922871 |
| PARK7    | -0.77454519  | 0.440703846 | -0.901865503 | 0.370884343 | 0.02571748   | 0.979573723 |
| PARL     | 1.174428201  | 0.243421281 | 0.771504146  | 0.443561962 | 1.945826907  | 0.05667947  |
| PARM1    | 1.287675075  | 0.201266489 | 0.23391359   | 0.815881508 | 1.158767188  | 0.251448059 |
| PARN     | -0.708721322 | 0.480388104 | 1.842035661  | 0.07061997  | 2.593844718  | 0.01207841  |
| PARP1    | -0.629294811 | 0.53080152  | 2.147897574  | 0.03594112  | 2.039320554  | 0.046127403 |
| PARP10   | -1.209280474 | 0.229824038 | 0.215873245  | 0.829849237 | -0.697269316 | 0.48850691  |
| PARP11   | 0.820402338  | 0.414224103 | 0.224874637  | 0.822872713 | -0.472918612 | 0.638101666 |
| PARP12   | -0.770617558 | 0.443016839 | 0.572259387  | 0.569373269 | -1.126423231 | 0.264770242 |
| PARP14   | -0.817869268 | 0.415661354 | 0.140505783  | 0.888750615 | -1.138898916 | 0.259573584 |
| PARP15   | 2.126444082  | 0.036292397 | -1.114674193 | 0.269619714 | -1.35741374  | 0.180072416 |
| PARP16   | -1.307064526 | 0.194627517 | -0.073738192 | 0.941474202 | 0.15274835   | 0.87914347  |
| PARP2    | 1.725431691  | 0.08799243  | 0.628515487  | 0.532150917 | 1.017404603  | 0.313318173 |
| PARP3    | -1.106272138 | 0.271651804 | 0.000352319  | 0.999720108 | -0.393803742 | 0.695215161 |
| PARP4    | -0.288947476 | 0.77330747  | 0.801709328  | 0.426016411 | -0.073008202 | 0.942058644 |
| PARP6    | 1.049525677  | 0.296836696 | 0.595398267  | 0.553909618 | 2.553008252  | 0.013419714 |
| PARP8    | -0.108083917 | 0.914177467 | -1.644563518 | 0.105507556 | -2.618534799 | 0.011327819 |
| PARP9    | -0.903467994 | 0.368766994 | -0.508316658 | 0.613172743 | -2.650326968 | 0.010423988 |
| PARS2    | 1.014939184  | 0.312943035 | 2.343765426  | 0.022563155 | 2.075237026  | 0.042550527 |
| PARVA    | 0.156098744  | 0.876316049 | 0.799239379  | 0.42743537  | 1.522465011  | 0.133496285 |
| PARVB    | -1.259470558 | 0.2112216   | 1.582017344  | 0.119121914 | 1.657631689  | 0.102960611 |
| PARVG    | -0.775925955 | 0.439892385 | 1.86017951   | 0.067968628 | 2.456041431  | 0.01716169  |
| PASK     | 3.85927522   | 0.000217581 | 1.577634469  | 0.120126646 | 2.498468375  | 0.015421746 |
| PATL1    | -1.458891721 | 0.14818819  | -2.120098906 | 0.038317253 | -2.11681358  | 0.038712979 |
| PATL2    | 2.016335914  | 0.046842601 | -1.67977687  | 0.098417575 | -0.750341529 | 0.456177014 |
| PATZ1    | 2.799876187  | 0.006294273 | -0.517632187 | 0.606697425 | 0.116633027  | 0.907566389 |

|          |              |             |              |             |              |             |
|----------|--------------|-------------|--------------|-------------|--------------|-------------|
| PAWR     | 0.151855088  | 0.879652064 | 0.260461978  | 0.79543638  | 0.42450747   | 0.672815437 |
| PAX5     | 0.651597111  | 0.516375005 | 1.172851443  | 0.245683255 | 0.772280798  | 0.443181651 |
| PAX6     | -0.827935988 | 0.409967255 | -0.978116748 | 0.332107152 | -0.291745556 | 0.771554678 |
| PAX8     | 0.351144682  | 0.7263269   | -0.745269251 | 0.459139503 | 0.932406217  | 0.355112561 |
| PAXIP1   | 0.830727431  | 0.408396707 | 0.140746965  | 0.88856093  | 0.763988937  | 0.448067482 |
| PBLD     | -0.023194826 | 0.981547868 | 1.217037366  | 0.228553313 | 0.410046964  | 0.683329419 |
| PBRM1    | 1.563693221  | 0.121512137 | -0.071387989 | 0.943336277 | -0.694381685 | 0.490301655 |
| PBX1     | -3.167341316 | 0.00212087  | 0.398187459  | 0.691964193 | 0.0998471    | 0.920820807 |
| PBX2     | -1.598021453 | 0.113656192 | -2.972875556 | 0.004301485 | -2.328418605 | 0.023510163 |
| PBX3     | -0.150762849 | 0.880511047 | -0.75688835  | 0.452201905 | -1.077161718 | 0.286007107 |
| PBX4     | 1.422064635  | 0.15857504  | 0.966431363  | 0.337868929 | 1.137621348  | 0.260102389 |
| PBXIP1   | -1.258298099 | 0.21164314  | 1.984704349  | 0.051947799 | 2.595582425  | 0.012024137 |
| PC       | -0.603064073 | 0.5480316   | 1.342866053  | 0.184583559 | 1.593769761  | 0.116593134 |
| PCBD1    | -0.159045405 | 0.874000935 | -1.950821183 | 0.055949175 | -2.155112113 | 0.035448775 |
| PCBD2    | 0.323031373  | 0.747444921 | -1.343922948 | 0.184243531 | -0.4078065   | 0.684964146 |
| PCBP1    | -2.417014165 | 0.017732256 | -1.564619553 | 0.123150367 | -2.765812747 | 0.007667768 |
| PCBP2    | -2.30919177  | 0.023297091 | -1.161405738 | 0.250267532 | -1.235622943 | 0.221735568 |
| PCBP3    | -1.408830867 | 0.162441545 | -0.782442285 | 0.437159798 | -0.353360431 | 0.725139464 |
| PCBP4    | 1.369029933  | 0.174506487 | -0.247978241 | 0.805033205 | 0.787038656  | 0.434563621 |
| PCCA     | -0.489410141 | 0.625780388 | 2.176337647  | 0.033644588 | 2.3934069    | 0.020054247 |
| PCCB     | 0.200707214  | 0.841394968 | 2.598104792  | 0.011882174 | 2.503203162  | 0.015237803 |
| PCDH1    | -2.170952838 | 0.032651974 | -0.376085969 | 0.708234739 | 0.54951195   | 0.584829833 |
| PCDH11Y  | -0.125599781 | 0.900337897 | 1.463154817  | 0.148861066 | 1.187408811  | 0.240057706 |
| PCDH12   | 0.80959869   | 0.420374857 | 0.774011663  | 0.442089459 | 0.110957079  | 0.912045437 |
| PCDH7    | -1.077478741 | 0.284238585 | 2.292612743  | 0.025542096 | 2.376379637  | 0.020912715 |
| PCDH9    | 0.29915426   | 0.765534263 | 1.188389736  | 0.239556955 | 0.496974381  | 0.621144476 |
| PCDHGB6  | -0.986894853 | 0.326425026 | -0.22294945  | 0.824363642 | 0.081461621  | 0.93536408  |
| PCDHGC3  | 0.94772463   | 0.345889029 | 0.384496093  | 0.702026805 | -0.184746837 | 0.85409225  |
| PCF11    | 1.458977757  | 0.148164559 | -0.240402941 | 0.810871523 | -1.938414789 | 0.057598039 |
| PCGF1    | -2.499841608 | 0.014296962 | -1.91221062  | 0.060827105 | -2.043837041 | 0.045663768 |
| PCGF3    | 2.021316066  | 0.04631408  | -2.258819566 | 0.027696878 | -2.773885781 | 0.007502734 |
| PCGF5    | -1.128269723 | 0.262301112 | -0.329849088 | 0.742710669 | -1.699967815 | 0.094662101 |
| PCGF6    | -1.084258573 | 0.281239283 | -0.91034408  | 0.366435167 | -1.012089325 | 0.31583017  |
| PCID2    | 2.890813098  | 0.004848997 | 0.273572135  | 0.785392099 | 0.946363497  | 0.348011934 |
| PCIF1    | -1.142091113 | 0.256542922 | 0.518881852  | 0.605831161 | 0.659180472  | 0.512470152 |
| PCK2     | 0.364908621  | 0.716063261 | 2.550738353  | 0.013430445 | 1.756253697  | 0.084489448 |
| PCM1     | 1.993635213  | 0.049317594 | 2.929226413  | 0.004862029 | 2.933953635  | 0.004836522 |
| PCMT1    | -0.373938979 | 0.709357515 | 1.309672406  | 0.195506759 | 1.023697947  | 0.310361449 |
| PCMTD1   | -0.122488918 | 0.902793716 | -0.16025205  | 0.87324324  | -2.002455822 | 0.050066196 |
| PCMTD2   | 1.169351105  | 0.245449091 | -1.518890828 | 0.13426052  | -3.372271611 | 0.021124693 |
| PCNA     | 0.536631015  | 0.592889183 | 1.181677236  | 0.242189805 | 2.472009442  | 0.016487079 |
| PCNP     | 0.37813785   | 0.706247271 | -0.313246745 | 0.755224756 | -0.786221291 | 0.435038317 |
| PCNT     | 1.554966976  | 0.123576489 | 1.216027239  | 0.228934918 | 1.498365032  | 0.139631072 |
| PCNX     | -1.413373618 | 0.161106216 | -0.281829861 | 0.779084136 | -0.347848149 | 0.729252884 |
| PCNXL2   | 2.399637681  | 0.018540153 | -1.742674007 | 0.086727667 | -0.81303864  | 0.419624731 |
| PCNXL3   | -0.35486777  | 0.723545601 | 0.131294882  | 0.895999583 | 0.922821634  | 0.36004262  |
| PCOLCE   | -0.363872087 | 0.716834408 | -0.619812492 | 0.537825679 | 0.151930388  | 0.879785588 |
| PCP2     | -1.246832914 | 0.215797909 | -0.611967912 | 0.542967303 | -1.337417535 | 0.186470597 |
| PCP4L1   | 0.950543582  | 0.344463631 | 0.150120954  | 0.881193667 | 0.7899905    | 0.432851858 |
| PCSK1N   | -0.754100396 | 0.452820771 | -1.462414824 | 0.149062971 | -1.203111889 | 0.233973596 |
| PCSK4    | 0.848336037  | 0.39857387  | -0.600026566 | 0.550842044 | -1.029241396 | 0.307772755 |
| PCSK5    | 1.028577291  | 0.306523383 | 0.842079632  | 0.403226395 | 0.69206194   | 0.491746076 |
| PCSK6    | -4.102284402 | 9.17E-05    | 0.767415742  | 0.445968974 | -0.191718684 | 0.848653134 |
| PCSK7    | 2.424396527  | 0.017398628 | -0.301796675 | 0.763894098 | 1.136848612  | 0.260422608 |
| PCTP     | -4.413820517 | 2.90E-05    | -0.345216817 | 0.731188956 | -0.545788088 | 0.587370187 |
| PCYOX1   | 0.783611566  | 0.435391603 | 1.833894426  | 0.071837638 | 2.328043855  | 0.023531543 |
| PCYOX1L  | 2.964125446  | 0.003913475 | 0.238475315  | 0.812358891 | 1.073427843  | 0.287663708 |
| PCYT1A   | -1.046998377 | 0.297994167 | -0.338048422 | 0.736555794 | -0.503044005 | 0.616897898 |
| PCYT1B   | -2.662069156 | 0.009246297 | 1.477845283  | 0.144897017 | 1.005540924  | 0.31894356  |
| PCYT2    | -0.017594272 | 0.986002726 | -1.460570436 | 0.149567139 | -0.276780665 | 0.782963307 |
| PDAP1    | -1.902176637 | 0.060449473 | -1.085714705 | 0.282128532 | -0.737055424 | 0.464152662 |
| PDCD1    | 2.089132683  | 0.039610313 | -0.475891462 | 0.635951851 | -0.817605496 | 0.417033102 |
| PDCD10   | -0.159531822 | 0.873618876 | -0.725583367 | 0.471032215 | -1.076299769 | 0.286388938 |
| PDCD11   | 0.857208947  | 0.393679489 | 2.29271251   | 0.025535962 | 2.410371157  | 0.019230496 |
| PDCD1LG2 | -2.415228089 | 0.017813826 | -1.827665808 | 0.072781115 | -2.075838051 | 0.042492779 |
| PDCD2    | 1.165016421  | 0.247189893 | -0.041477518 | 0.967058666 | -0.294175702 | 0.769706738 |
| PDCD2L   | 1.021309422  | 0.309933344 | -0.120088902 | 0.904830647 | 0.7389778    | 0.46299375  |
| PDCD4    | 0.457813978  | 0.648224986 | 3.003841804  | 0.003940933 | 1.920245932  | 0.059903566 |
| PDCD5    | -0.010403921 | 0.991722791 | -3.070501582 | 0.003258245 | -1.583867707 | 0.118831828 |
| PDCD6    | -0.374287059 | 0.709099492 | -0.017436539 | 0.986148622 | 0.152083221  | 0.879665605 |
| PDCD6IP  | 1.519766462  | 0.132187866 | -0.353154101 | 0.725262188 | -0.692106881 | 0.491718071 |
| PDCD7    | 0.49937391   | 0.618773783 | 1.850373818  | 0.069390902 | 0.706173956  | 0.482995391 |

|          |              |             |              |             |              |             |
|----------|--------------|-------------|--------------|-------------|--------------|-------------|
| PDCL     | -0.276673745 | 0.782685463 | 0.436892613  | 0.663822841 | -0.037412876 | 0.9702883   |
| PDCL3    | 1.081363973  | 0.28251713  | 3.299760501  | 0.001663605 | 4.020725099  | 0.00017458  |
| PDDC1    | 0.360030229  | 0.719695178 | 1.849559869  | 0.069510081 | 2.929006585  | 0.004903656 |
| PDE12    | -0.1782431   | 0.858945557 | -0.49337413  | 0.623624281 | -0.194917533 | 0.846159996 |
| PDE1B    | 1.219374709  | 0.225990485 | 1.04074101   | 0.302344854 | 2.652360751  | 0.010368474 |
| PDE2A    | -1.446827248 | 0.151531045 | 0.491376567  | 0.625027451 | -0.112547192 | 0.910790339 |
| PDE3B    | 1.402631086  | 0.164277642 | -0.987668955 | 0.327445869 | -1.618336881 | 0.11118563  |
| PDE4A    | -1.492140101 | 0.139272031 | -0.683977299 | 0.496732265 | 0.166396003  | 0.868442138 |
| PDE4B    | -2.370311184 | 0.019978162 | -0.825186978 | 0.412670158 | -2.785394946 | 0.007273107 |
| PDE4D    | -0.397419798 | 0.69202919  | -1.001926822 | 0.320569775 | -1.497709501 | 0.139801004 |
| PDE4DIP  | 3.576031614  | 0.000571862 | 2.696522417  | 0.009172273 | 3.508014964  | 0.000895618 |
| PDE5A    | -4.759817875 | 7.64E-06    | 0.892201722  | 0.375997237 | -0.255941934 | 0.798929563 |
| PDE6B    | 2.961939312  | 0.003938773 | -1.594092169 | 0.116388805 | -0.461815312 | 0.645995319 |
| PDE6D    | -0.781340967 | 0.436718472 | -3.329065707 | 0.00152367  | -2.449415624 | 0.01744884  |
| PDE6G    | -1.03259612  | 0.304648714 | -0.889286582 | 0.377548301 | 0.440748956  | 0.66108445  |
| PDE7A    | 1.844688741  | 0.068478329 | 0.249520281  | 0.803846102 | 0.818456036  | 0.416551505 |
| PDE7B    | 1.939300438  | 0.055698416 | 0.952186584  | 0.344981282 | 0.693869084  | 0.490620631 |
| PDE8A    | 0.731060752  | 0.466702189 | -1.415479168 | 0.162312694 | -1.40342308  | 0.165988448 |
| PDE8B    | 0.981960618  | 0.328836254 | -0.890105144 | 0.377112359 | -0.857299552 | 0.39491812  |
| PDE9A    | 0.887530732  | 0.377234998 | 1.844457693  | 0.070261081 | 1.908683595  | 0.061411315 |
| PDF      | 0.728334158  | 0.468360717 | -1.708773107 | 0.092877058 | -1.916818253 | 0.060347219 |
| PDGFA    | -2.384460808 | 0.019272417 | 2.573834809  | 0.012653968 | 1.618445496  | 0.111162182 |
| PDGFB    | 1.284404526  | 0.202402701 | -1.528565023 | 0.131846026 | -1.361060971 | 0.178923686 |
| PDGFC    | 1.944152646  | 0.055101464 | -0.124078269 | 0.901685314 | -0.266004451 | 0.791208603 |
| PDGFD    | 0.700220448  | 0.485653914 | -2.711190356 | 0.008820768 | -2.667679024 | 0.009598946 |
| PDGFRB   | 0.946462542  | 0.346528438 | -0.546579642 | 0.586778858 | -0.939537619 | 0.351472876 |
| PDHA1    | 1.456475162  | 0.148853147 | 1.049870444  | 0.298162971 | 2.077924913  | 0.042292798 |
| PDHB     | 0.361873843  | 0.718321863 | -0.228918716 | 0.819742987 | 1.147997085  | 0.255829814 |
| PDHX     | 0.864830082  | 0.389505291 | -0.085276464 | 0.932337341 | 0.49064218   | 0.625588619 |
| PDIA3    | -0.287211352 | 0.774631984 | 2.408964015  | 0.019217385 | 2.28653837   | 0.026009429 |
| PDIA3P   | 0.401398627  | 0.689108782 | -0.273494005 | 0.785451851 | 0.690034272  | 0.49301055  |
| PDIA4    | -0.060314021 | 0.95204357  | 1.42492189   | 0.159576198 | 1.722389283  | 0.090495009 |
| PDIA5    | 1.006738768  | 0.316846144 | 1.852149925  | 0.06913144  | 2.651486401  | 0.010392307 |
| PDIA6    | 0.731105362  | 0.466675081 | 2.025724617  | 0.047434541 | 2.080041326  | 0.042090821 |
| PDIK1L   | 1.621307558  | 0.108562728 | 0.202057987  | 0.840583388 | -0.524714713 | 0.601843936 |
| PDK1     | 1.560638661  | 0.122231606 | -0.891085763 | 0.37659053  | -1.29526691  | 0.200520238 |
| PDK2     | -0.037857189 | 0.969888093 | 1.098111109  | 0.276725387 | 1.540922659  | 0.128944174 |
| PDK3     | -0.398369382 | 0.691331782 | -0.194576363 | 0.846409306 | 0.013166584  | 0.989541489 |
| PDK4     | -1.520726883 | 0.131946791 | 2.216496513  | 0.0306214   | -0.861487806 | 0.392627898 |
| PDLIM1   | -2.930084705 | 0.004324935 | 1.454374262  | 0.151270662 | 1.368448387  | 0.176614111 |
| PDLIM2   | -2.093039745 | 0.039251014 | -1.684266417 | 0.097542539 | -1.822524675 | 0.073693463 |
| PDLIM5   | -2.319876765 | 0.022683903 | -0.589137665 | 0.558072673 | -1.956256265 | 0.055408197 |
| PDLIM7   | -1.752473548 | 0.083207885 | -1.04616926  | 0.299853555 | -1.199896718 | 0.235210082 |
| PDP1     | 0.3842184    | 0.70175205  | -0.421600058 | 0.67488633  | -1.628860547 | 0.108932287 |
| PDP2     | 0.862864244  | 0.390579377 | -0.193273861 | 0.847424451 | 0.812477137  | 0.419944047 |
| PDPK1    | 0.051498855  | 0.959045817 | -0.376970696 | 0.707580732 | -1.047953019 | 0.29914335  |
| P DPR    | 1.209105382  | 0.229890946 | 0.424853392  | 0.672526536 | 1.789500323  | 0.078919313 |
| PDRG1    | 0.37507768   | 0.708513551 | 0.618232931  | 0.538858961 | 1.771957778  | 0.08181894  |
| PDS5A    | 1.710690381  | 0.090694265 | 0.507958399  | 0.613422397 | -0.361788896 | 0.718865661 |
| PDS5B    | 0.454952061  | 0.650274538 | 1.154229519  | 0.253172865 | 0.019021756  | 0.984891078 |
| PDS51    | 1.162097886  | 0.248366916 | 0.302619329  | 0.763270201 | 0.022934743  | 0.981783512 |
| PDS52    | 2.360235888  | 0.020494585 | 0.701004431  | 0.486122811 | 1.198722845  | 0.235662711 |
| PDXDC1   | 1.950893999  | 0.054281108 | 1.588543008  | 0.117638502 | 0.81088498   | 0.42085027  |
| PDXDC2P  | 2.546707189  | 0.012629605 | 1.056621374  | 0.295096213 | 3.17428054   | 0.002436571 |
| PDXK     | -0.937954253 | 0.350858938 | 2.749020142  | 0.007970445 | 1.649662811  | 0.104587223 |
| PDXP     | -1.124297047 | 0.263972863 | -1.86230528  | 0.06766356  | -1.77808777  | 0.080795777 |
| PDZD11   | 0.270860399  | 0.7871386   | -1.346213285 | 0.18350831  | -1.041061821 | 0.302301946 |
| PDZD2    | 0.151440959  | 0.879977736 | -1.348762211 | 0.182692704 | 0.256487004  | 0.798510806 |
| PDZD3    | -1.708626551 | 0.091077891 | 0.203738234  | 0.839276204 | 0.598865465  | 0.551667409 |
| PDZD4    | 1.045405001  | 0.298725488 | -2.136281993 | 0.036917837 | -0.686584745 | 0.495165814 |
| PDZD7    | 1.194476747  | 0.235530906 | -1.917037293 | 0.060198184 | -1.369955265 | 0.176145819 |
| PDZD8    | -1.163352555 | 0.24786043  | 0.255611977  | 0.799161117 | -0.812905403 | 0.419700487 |
| PDZK1    | 1.828228965  | 0.070935024 | -0.506607129 | 0.614364446 | -1.137868768 | 0.259999919 |
| PDZK1IP1 | -3.817960848 | 0.000251221 | 1.468514345  | 0.147405127 | -1.005901994 | 0.318771356 |
| PEA15    | 0.832491766  | 0.407405922 | -0.854538035 | 0.396347425 | -1.176105091 | 0.244507631 |
| PEAK1    | 0.640219093  | 0.523709097 | -0.153298167 | 0.878698971 | 0.173312777  | 0.863027897 |
| PEAR1    | -4.038797981 | 0.000115253 | 1.361587809  | 0.178630567 | -0.153992883 | 0.878166642 |
| PEBP1    | 0.749583483  | 0.45552338  | 2.492873474  | 0.015568952 | 3.461638175  | 0.001032557 |
| PECAM1   | -3.292566716 | 0.001434982 | 0.845866167  | 0.401127916 | 1.890391167  | 0.063862533 |
| PECR     | 0.882891874  | 0.379722518 | 1.438140047  | 0.155805902 | 2.349956994  | 0.022310066 |
| PEF1     | -1.535105154 | 0.128378991 | 2.315885793  | 0.024145961 | 2.650867268  | 0.010409213 |
| PEG10    | -0.573458019 | 0.567810841 | 0.312758036  | 0.755594141 | -0.700238413 | 0.48666533  |

|         |              |             |              |             |              |              |
|---------|--------------|-------------|--------------|-------------|--------------|--------------|
| PELI1   | -0.568879808 | 0.570900218 | -1.791137879 | 0.078525883 | -3.338461486 | 0.001499317  |
| PELI2   | -2.128659623 | 0.03610319  | -0.088925871 | 0.929449314 | -1.965767488 | 0.054270189  |
| PELI3   | -1.097481775 | 0.27545258  | 2.033648663  | 0.046602811 | 2.126621828  | 0.037852954  |
| PELO    | -1.840524758 | 0.069093001 | -1.401799261 | 0.166341395 | -0.973482976 | 0.334482121  |
| PELP1   | 0.231145891  | 0.81774303  | 2.421465342  | 0.0186292   | 3.033900168  | 0.003650334  |
| PEMT    | -0.812275636 | 0.418845749 | 0.977385511  | 0.332465785 | 0.512537548  | 0.610282142  |
| PEPD    | -1.055032022 | 0.294325464 | 1.955915786  | 0.055331201 | 2.447797215  | 0.017519633  |
| PER1    | 2.689832615  | 0.008565945 | 0.022743219  | 0.981933711 | 0.203711592  | 0.83931425   |
| PER2    | 1.550708279  | 0.124594025 | -0.408534472 | 0.684396284 | -0.220549014 | 0.826242344  |
| PER3    | 3.659575838  | 0.000432088 | -2.322811386 | 0.023743815 | -0.392829554 | 0.695930495  |
| PERP    | -0.628238478 | 0.531489948 | -0.809860393 | 0.421353767 | -0.051271394 | 0.959290945  |
| PES1    | -1.117930297 | 0.266667635 | 3.343488849  | 0.001458955 | 3.868733349  | 0.00028669   |
| PET112  | 1.178079078  | 0.241970529 | 0.428601229  | 0.669812155 | 3.102702813  | 0.002998147  |
| PET117  | 1.268280647  | 0.20807381  | 0.230921697  | 0.818193961 | -0.058795917 | 0.953323092  |
| PEX1    | 2.975924094  | 0.003779517 | 0.461793382  | 0.645969001 | 0.269435556  | 0.788580679  |
| PEX10   | 1.801999553  | 0.075001524 | -1.721849237 | 0.090463851 | -1.165012701 | 0.248931867  |
| PEX11A  | 0.559822263  | 0.577036126 | -0.532665509 | 0.596314311 | 0.88616877   | 0.37930042   |
| PEX11B  | 2.208673565  | 0.029820033 | -1.678942454 | 0.098581104 | 0.390041965  | 0.697978924  |
| PEX11G  | -0.762224024 | 0.447983407 | 4.818970407  | 1.09E-05    | 4.434888142  | 4.33E-05     |
| PEX12   | 0.416197583  | 0.678288147 | -0.97746544  | 0.332426572 | -0.71973302  | 0.474670029  |
| PEX13   | 1.082512658  | 0.282009554 | -2.551909877 | 0.013390042 | -1.547264868 | 0.127408917  |
| PEX14   | -0.401012016 | 0.689392344 | -0.70628839  | 0.48285617  | -0.292072801 | 0.771305756  |
| PEX16   | -1.510063887 | 0.134642813 | 0.358331597  | 0.721405209 | 0.443369324  | 0.659199682  |
| PEX19   | -0.145499483 | 0.88465237  | -1.308375811 | 0.195943104 | 0.099167747  | 0.921357736  |
| PEX2    | 0.440671301  | 0.660541658 | -0.273591245 | 0.785377484 | -0.201707395 | 0.840873342  |
| PEX26   | 1.416755796  | 0.160117523 | -0.237660672 | 0.812987684 | 0.951453027  | 0.9514545906 |
| PEX3    | 3.160270302  | 0.002167534 | -1.357680052 | 0.179860866 | -1.244284327 | 0.218556043  |
| PEX5    | 1.237835193  | 0.219100128 | 2.407606723  | 0.019282238 | 2.031492268  | 0.046940652  |
| PEX6    | 0.182226848  | 0.855827723 | 1.875766642  | 0.065758472 | 2.249909363  | 0.028385795  |
| PEX7    | 4.821678056  | 5.98E-06    | -0.86205181  | 0.392234017 | 0.507741441  | 0.613620362  |
| PF4     | -5.207323622 | 1.26E-06    | 2.30870752   | 0.024569163 | 0.928821008  | 0.356951554  |
| PF4V1   | -2.988612719 | 0.003640194 | 0.484123735  | 0.630133841 | 0.508912889  | 0.612804239  |
| PFAS    | 1.040682306  | 0.300900244 | 1.092233214  | 0.279278262 | 1.783549241  | 0.079893205  |
| PFDN1   | 0.751295662  | 0.454497845 | -0.669414636 | 0.5059057   | 0.264892256  | 0.792060972  |
| PFDN2   | 0.911878988  | 0.364346831 | -2.201582901 | 0.031714977 | -1.359672829 | 0.179360233  |
| PFDN4   | 0.123033413  | 0.902363805 | -0.298856951 | 0.766124849 | 0.383105298  | 0.703086045  |
| PFDN5   | 0.405587538  | 0.686039262 | -0.120796065 | 0.904272986 | 0.72484361   | 0.47155321   |
| PFDN6   | -0.672976585 | 0.502742037 | -1.214822528 | 0.229390641 | -0.545070468 | 0.587860337  |
| PFKFB2  | -1.327777966 | 0.187717257 | 0.549413282  | 0.584845863 | -0.50087378  | 0.618414783  |
| PFKFB3  | -0.246931476 | 0.805541751 | 0.736707159  | 0.464290737 | 0.642971242  | 0.794300802  |
| PFKFB4  | -1.563847875 | 0.1214758   | 0.568126603  | 0.572157305 | -0.419784096 | 0.676242629  |
| PFKL    | -0.297475848 | 0.76681087  | 1.016052549  | 0.313853576 | 1.237366738  | 0.221092714  |
| PFKM    | 2.63130459   | 0.010057198 | 2.583497675  | 0.012341387 | 2.6463162    | 0.010534263  |
| PFKP    | 0.007864203  | 0.993743305 | 1.098693616  | 0.276473286 | 0.164651085  | 0.869809019  |
| PFN1    | -1.741928915 | 0.08504743  | -1.018283518 | 0.312801592 | -0.480829936 | 0.632502803  |
| PFN2    | 1.361803925  | 0.17676814  | -0.213453646 | 0.831726921 | 0.668735663  | 0.506400016  |
| PGAM1   | -2.205272346 | 0.030066267 | 1.398233516  | 0.167404074 | 1.997994901  | 0.050561919  |
| PGAM2   | 0.872604469  | 0.385275489 | -0.909760537 | 0.366740285 | 0.996403094  | 0.323322448  |
| PGAM4   | -1.480995144 | 0.142212734 | -1.227071678 | 0.224787779 | -1.301490444 | 0.198397244  |
| PGAM5   | -0.232236431 | 0.816898627 | 1.888607418  | 0.063983645 | 2.097192863  | 0.040484678  |
| PGAP1   | 1.087722479  | 0.279715364 | -0.621180348 | 0.536931712 | -2.125783238 | 0.037925827  |
| PGAP2   | -0.127167864 | 0.899100367 | -0.942429765 | 0.349908958 | -0.509012784 | 0.612734667  |
| PGAP3   | 0.212739769  | 0.832026549 | 1.147224043  | 0.256032249 | 2.232075065  | 0.029610873  |
| PGBD1   | 1.582386481  | 0.117182269 | 0.37395045   | 0.709814266 | 1.565861583  | 0.122991284  |
| PGBD2   | 2.485638927  | 0.014839894 | -0.841079167 | 0.403781973 | -0.930559039 | 0.356059283  |
| PGBD3   | 0.45409901   | 0.650885969 | 1.365933692  | 0.177269887 | 2.245469122  | 0.028686539  |
| PGBD4   | 1.131264649  | 0.261045738 | -2.777381018 | 0.007383092 | -3.539858045 | 0.000811797  |
| PGBD5   | 1.332538605  | 0.186155401 | 1.288089909  | 0.202865595 | 0.61326849   | 0.542171323  |
| PGCP    | -2.468895508 | 0.015503636 | 1.21504246   | 0.229307395 | 0.85132726   | 0.398198202  |
| PGD     | -2.933289633 | 0.004284559 | 1.208564212  | 0.231768724 | 1.254467423  | 0.214861078  |
| PGGT1B  | -0.731665108 | 0.466335021 | 0.317701452  | 0.751860365 | -0.903283826 | 0.370228289  |
| PGK1    | -1.206485958 | 0.230893599 | 1.165650792  | 0.248560185 | 1.201199614  | 0.234708445  |
| PGLS    | -0.961838667 | 0.338790607 | 0.902107636  | 0.370756807 | 1.080196628  | 0.2846655    |
| PGLYRP1 | -2.661246335 | 0.00926719  | -0.463431696 | 0.644801489 | -0.989583453 | 0.326616551  |
| PGM1    | -1.089929087 | 0.278747566 | 2.127291088  | 0.037689701 | 2.545820199  | 0.013669344  |
| PGM2    | 1.282104182  | 0.203204701 | 0.084930014  | 0.932611559 | -0.718533872 | 0.475403039  |
| PGM2L1  | 1.052741307  | 0.295368406 | -1.094592323 | 0.278251691 | -1.272526348 | 0.208422398  |
| PGM3    | 2.273273169  | 0.025467008 | -1.576138332 | 0.120471176 | -1.620081016 | 0.110809582  |
| PGM5    | -1.575731218 | 0.118709466 | 0.489358507  | 0.626446436 | -0.096936398 | 0.923121548  |
| PGP     | 1.521768825  | 0.131685646 | 0.050696652  | 0.959742653 | -0.22149951  | 0.825505853  |
| PGPEP1  | -0.093735113 | 0.925534645 | 0.971178594  | 0.335520283 | 2.398812264  | 0.019788404  |
| PGRMC1  | -4.914846669 | 4.13E-06    | -0.890897327 | 0.376690769 | -2.312776275 | 0.024417458  |

|          |              |             |              |             |              |             |
|----------|--------------|-------------|--------------|-------------|--------------|-------------|
| PGRMC2   | 0.277366391  | 0.782155362 | -1.096567622 | 0.277394165 | -0.615102473 | 0.540968191 |
| PGS1     | 1.04636692   | 0.298283845 | -0.585479503 | 0.560512414 | -1.658001602 | 0.102885608 |
| PHACTR1  | -2.800603673 | 0.00628129  | 1.084919911  | 0.282477442 | 0.79554036   | 0.429644385 |
| PHACTR2  | -0.118910179 | 0.905620061 | -0.737079373 | 0.464066117 | -1.492010963 | 0.141285114 |
| PHACTR4  | 0.221805986  | 0.824983613 | 1.147055733  | 0.256101229 | 1.914229533  | 0.060684135 |
| PHAX     | 0.525365551  | 0.600662624 | 1.410188177  | 0.163861827 | 2.154241347  | 0.035520225 |
| PHB      | 0.412694057  | 0.680843853 | -0.144067939 | 0.885949725 | 0.86421947   | 0.391138633 |
| PHB2     | 0.60128497   | 0.549210339 | -1.141140141 | 0.258534097 | -0.384407718 | 0.70212608  |
| PHC1     | 0.679896764  | 0.49837109  | -2.088503692 | 0.041183236 | -1.340898404 | 0.185344589 |
| PHC2     | -2.654439384 | 0.009441673 | -0.347157923 | 0.729737995 | -0.917074587 | 0.363019813 |
| PHC3     | 1.632560748  | 0.106167969 | -0.271141912 | 0.787251292 | -0.705734081 | 0.483266835 |
| PHEX     | 0.769839667  | 0.443475777 | 1.17312872   | 0.245572954 | -0.065452801 | 0.94804561  |
| PHF1     | -0.12497021  | 0.900834824 | -0.635966492 | 0.527317354 | -0.198018098 | 0.843744967 |
| PHF10    | 1.455723444  | 0.149060466 | 2.373352083  | 0.020985264 | 3.464849777  | 0.001022466 |
| PHF11    | -1.387863004 | 0.168715303 | -1.719033    | 0.090979169 | -2.624100073 | 0.011164615 |
| PHF12    | -1.135486903 | 0.259283097 | -1.032594997 | 0.306109918 | -1.01652609  | 0.313732424 |
| PHF13    | 1.272604707  | 0.206541568 | 2.728324234  | 0.008425828 | 2.248704564  | 0.028467121 |
| PHF14    | 2.25508754   | 0.026632018 | 1.79977562   | 0.077134295 | 1.762231872  | 0.083464431 |
| PHF15    | 1.109094304  | 0.27043934  | 1.393048144  | 0.168958771 | 1.553136685  | 0.12600058  |
| PHF16    | -0.090396063 | 0.92817983  | 1.436189289  | 0.156357926 | 0.493157212  | 0.623821803 |
| PHF17    | -1.070421875 | 0.287383756 | 1.480033008  | 0.14431385  | 0.585577964  | 0.560501827 |
| PHF19    | 2.575835177  | 0.011683663 | -0.076409463 | 0.939358142 | 1.434266719  | 0.157033682 |
| PHF2     | 0.472398044  | 0.637822995 | -0.814720564 | 0.418588288 | -1.495835615 | 0.140287667 |
| PHF20    | -1.386194444 | 0.169222388 | 0.493012208  | 0.623878407 | -0.164624777 | 0.869829631 |
| PHF20L1  | -0.754208583 | 0.452756152 | -1.136776636 | 0.260339152 | -2.305783929 | 0.024833013 |
| PHF21A   | -1.205754666 | 0.231174083 | -0.09363786  | 0.925721808 | -0.168103252 | 0.867105156 |
| PHF23    | -1.45494544  | 0.149275271 | 0.292986911  | 0.770585154 | 0.080100642  | 0.936441583 |
| PHF3     | -0.615344    | 0.539930429 | 0.060250499  | 0.9521647   | -0.171978094 | 0.86407214  |
| PHF5A    | -0.036768428 | 0.970753701 | -0.795081776 | 0.429830238 | -0.316647886 | 0.752683247 |
| PHF6     | 0.299600834  | 0.765194706 | -0.695359322 | 0.489626232 | -1.082385879 | 0.283700442 |
| PHF7     | 1.94605186   | 0.054869291 | -1.07975539  | 0.284751948 | 0.093329171  | 0.925973767 |
| PHF8     | 0.307515849  | 0.759184116 | 0.339085964  | 0.735778182 | 0.509698572  | 0.612257146 |
| PHGDH    | -0.124660386 | 0.901079386 | 1.774639826  | 0.081242088 | 3.534952388  | 0.000824204 |
| PHIP     | 0.353528959  | 0.724545322 | -0.700634573 | 0.486351923 | -1.898265321 | 0.062797391 |
| PHKA2    | -1.205752224 | 0.231175021 | 1.912275744  | 0.060818582 | 2.392146683  | 0.020116685 |
| PHKB     | -0.738844674 | 0.461985684 | 1.116423131  | 0.268876974 | 0.300124736  | 0.765188637 |
| PHKG1    | -0.4253479   | 0.671631088 | -1.482455984 | 0.143670129 | -1.257338469 | 0.213827712 |
| PHKG2    | 0.026497574  | 0.978921023 | 1.045500657  | 0.30015965  | 1.629578948  | 0.108779824 |
| PHLDA1   | 0.417395064  | 0.677415485 | -1.705885777 | 0.093417003 | -1.871001591 | 0.066550855 |
| PHLDA3   | 0.788938758  | 0.432287861 | 0.764160154  | 0.447891121 | 0.005512256  | 0.995621386 |
| PHLDB1   | 2.808317907  | 0.006145125 | -0.132516533 | 0.895037619 | 1.12100379   | 0.267050461 |
| PHLDB2   | 0.355020378  | 0.723431676 | -1.892825456 | 0.063409571 | -0.651229959 | 0.517550421 |
| PHLDB3   | 1.989064651  | 0.049829185 | 0.80955828   | 0.421526034 | 1.615873575  | 0.111718497 |
| PHLPP1   | -2.001986896 | 0.048394351 | 0.153026589  | 0.878912161 | -0.45179343  | 0.653155514 |
| PHLPP2   | 2.223873868  | 0.028741028 | 0.454142184  | 0.651433292 | 0.65744417   | 0.502163161 |
| PHOCN    | -1.449950771 | 0.150660016 | -4.196507187 | 9.49E-05    | -3.982010647 | 0.000198259 |
| PHOSPHO1 | -3.558397608 | 0.000606397 | -2.286280302 | 0.025934174 | -2.405138315 | 0.019481295 |
| PHOSPHO2 | 1.608346621  | 0.111374575 | -1.347755067 | 0.18301464  | -0.799839003 | 0.427169809 |
| PHPT1    | -1.985398597 | 0.050242799 | -2.173660809 | 0.033855113 | -1.396727661 | 0.167983453 |
| PHRF1    | 0.693889128  | 0.489596364 | 0.22507834   | 0.822714997 | 0.47317103   | 0.637922699 |
| PHTF1    | -0.031142594 | 0.975227    | 0.327315641  | 0.744615856 | -0.577494812 | 0.565910263 |
| PHTF2    | 1.107718558  | 0.271029919 | -0.739202168 | 0.462786259 | -1.55738452  | 0.124989532 |
| PHYH     | 0.589316957  | 0.557172611 | 1.54947745   | 0.126744719 | 2.719322769  | 0.008684905 |
| PHYHD1   | 0.239056445  | 0.811622844 | 0.421550636  | 0.674922204 | 0.274825284  | 0.784457617 |
| PI16     | -0.176355297 | 0.860423808 | 1.982834345  | 0.052162051 | 1.11281972   | 0.270520116 |
| PI3      | -0.749583467 | 0.45552339  | -0.757467002 | 0.451857997 | -0.173675709 | 0.862743984 |
| PI4K2A   | -0.531062289 | 0.596725878 | 1.397708856  | 0.167560876 | 1.260871078  | 0.212561291 |
| PI4K2B   | 0.544121992  | 0.587746331 | -0.2551038   | 0.799551663 | -1.45785973  | 0.150441361 |
| PI4KA    | 0.137656886  | 0.890829    | 0.290083191  | 0.772794416 | 0.637236363  | 0.526556735 |
| PI4KAP1  | 2.024635162  | 0.045964682 | -1.530541976 | 0.131356891 | -1.467811997 | 0.147726323 |
| PI4KAP2  | 2.105606885  | 0.038114351 | -0.625127956 | 0.534356043 | 0.599982937  | 0.550927653 |
| PI4KB    | -0.038881293 | 0.969073922 | 0.716672888  | 0.476472082 | 1.09214712   | 0.279425225 |
| PIAS1    | -1.736333086 | 0.086037148 | -1.32429993  | 0.190634681 | -2.137706249 | 0.036901157 |
| PIAS2    | -0.436708593 | 0.663402305 | -0.982064407 | 0.330175466 | -1.065493542 | 0.291205939 |
| PIAS3    | 0.711449533  | 0.478704866 | -2.127392545 | 0.037680913 | -1.537618193 | 0.129749913 |
| PIAS4    | 0.192046058  | 0.848152704 | -0.5657524   | 0.573759676 | -0.445449605 | 0.657704966 |
| PIBF1    | 0.605283533  | 0.546562891 | -0.307097877 | 0.759876476 | 0.183057511  | 0.855411268 |
| PICALM   | -1.714129347 | 0.090057964 | -1.14172427  | 0.258293137 | -1.774231    | 0.081438262 |
| PICK1    | -0.358907951 | 0.720531619 | -0.448687634 | 0.655340581 | 0.623793026  | 0.535285687 |
| PID1     | 1.519924384  | 0.132148202 | -0.570079718 | 0.570840769 | -0.53547148  | 0.594435247 |
| PIDD     | 1.074279086  | 0.285661689 | 0.725631817  | 0.471002732 | 1.76272815   | 0.083379807 |
| PIF1     | 0.933438794  | 0.353171305 | -0.996466007 | 0.323191818 | -0.724187827 | 0.471952506 |

|         |              |             |              |             |              |             |
|---------|--------------|-------------|--------------|-------------|--------------|-------------|
| PIGA    | 0.211050096  | 0.833340679 | -0.599299085 | 0.55132364  | -0.896231868 | 0.373949414 |
| PIGB    | -2.270671297 | 0.025630891 | -3.077496956 | 0.003193401 | -2.683591537 | 0.009549244 |
| PIGC    | 0.023533675  | 0.981278354 | 1.301535787  | 0.198257114 | 1.4593204    | 0.150040453 |
| PIGF    | 1.156172774  | 0.250768723 | -1.254679072 | 0.214662813 | -0.93416658  | 0.354221853 |
| PIGG    | 2.431825236  | 0.017068569 | 0.267964626  | 0.789683886 | 0.354553423  | 0.724250286 |
| PIGH    | 0.361603574  | 0.718523129 | -2.01526076  | 0.048552456 | -1.518806315 | 0.134413599 |
| PIGK    | 1.132604902  | 0.260485319 | -0.671446421 | 0.504620352 | -0.387568165 | 0.699798663 |
| PIGL    | 1.654177109  | 0.101687479 | -0.357654908 | 0.721908899 | -0.301065644 | 0.764474793 |
| PIGM    | 0.642024874  | 0.522541501 | -2.37503901  | 0.020898345 | -3.480326594 | 0.000975138 |
| PIGN    | 1.510176589  | 0.134614092 | 0.70473212   | 0.483817011 | 0.109237433  | 0.913403031 |
| PIGO    | 0.646603777  | 0.519586948 | 0.211053809  | 0.833590244 | 1.283997644  | 0.204407704 |
| PIGP    | -0.337223941 | 0.736758545 | -2.99821134  | 0.004004322 | -2.676193438 | 0.009737766 |
| PIGQ    | 0.555628968  | 0.579887483 | 2.15733241   | 0.035164492 | 2.876013432  | 0.00567912  |
| PIGR    | 0.829606583  | 0.409026891 | 0.988014474  | 0.327278083 | 0.626442495  | 0.53355944  |
| PIGS    | -0.990616392 | 0.32461416  | 0.195046328  | 0.846043088 | 0.288872041  | 0.773741485 |
| PIGT    | -2.233370103 | 0.028084422 | 0.540705698  | 0.590795469 | 0.809769197  | 0.421486054 |
| PIGU    | -0.268995729 | 0.788568482 | 0.741499205  | 0.461403627 | 2.285869111  | 0.026051215 |
| PIGV    | -0.712964834 | 0.47777138  | 0.957803649  | 0.342165085 | 1.020950372  | 0.311649975 |
| PIGW    | 1.27336273   | 0.206273822 | -1.598641299 | 0.115372322 | -1.462931365 | 0.149052946 |
| PIGX    | -2.596286094 | 0.011058228 | -0.510728772 | 0.611493055 | -1.239480138 | 0.220315444 |
| PIGY    | 0.478662726  | 0.633376774 | -1.492151103 | 0.141116982 | -1.27751317  | 0.206669968 |
| PIGZ    | 0.905119245  | 0.367896558 | -1.887753513 | 0.064100396 | -0.608904274 | 0.545039843 |
| PIH1D1  | 0.173231517  | 0.862870987 | 1.419683147  | 0.161089928 | 2.293827119  | 0.025558194 |
| PIK3AP1 | -1.177541684 | 0.242183684 | -0.263480568 | 0.793120549 | -2.66394559  | 0.010057371 |
| PIK3C2A | 1.144352905  | 0.255609193 | -2.201552126 | 0.031717269 | -2.67831717  | 0.009683302 |
| PIK3C2B | 1.021154959  | 0.310006092 | 0.512000551  | 0.610608288 | 0.653953419  | 0.515807158 |
| PIK3C3  | 0.358328409  | 0.720963688 | 1.347606455  | 0.183062181 | 1.357154651  | 0.180154232 |
| PIK3CA  | -0.086714092 | 0.93109761  | 0.466552573  | 0.642579946 | -0.776201581 | 0.440882328 |
| PIK3CB  | -0.050046321 | 0.960199948 | 2.097590364  | 0.040340485 | 1.821298726  | 0.073882136 |
| PIK3CD  | -0.938981186 | 0.350334411 | 0.713112927  | 0.478655282 | 0.406470165  | 0.685939908 |
| PIK3CG  | -1.184490683 | 0.239437742 | 0.802416013  | 0.425610948 | -0.929101687 | 0.356807362 |
| PIK3IP1 | 3.811320567  | 0.000257071 | 1.043037185  | 0.301289303 | 1.773624435  | 0.081539694 |
| PIK3R1  | 0.931890924  | 0.35396622  | 1.624585922  | 0.109711306 | 2.121381063  | 0.038310386 |
| PIK3R2  | 0.184077609  | 0.854380023 | -0.938255034 | 0.352031338 | -0.745176172 | 0.459268338 |
| PIK3R3  | -0.332056215 | 0.740643749 | -0.783226571 | 0.436702857 | 0.806025862  | 0.423623262 |
| PIK3R4  | 0.192823053  | 0.847545994 | 1.708778841  | 0.092875989 | 1.678503143  | 0.098798056 |
| PIK3R5  | -2.1107467   | 0.037657737 | 0.374538233  | 0.709379387 | 0.373756864  | 0.709990615 |
| PIK3R6  | 1.064203819  | 0.290174809 | -0.463865226 | 0.644492692 | -0.832083729 | 0.408881199 |
| PIKFYVE | 0.979305788  | 0.330138446 | -0.125013031 | 0.900948547 | -1.298568307 | 0.199391943 |
| PILRA   | -4.126551559 | 8.40E-05    | -1.015668071 | 0.314035113 | -1.360005901 | 0.179255413 |
| PILRB   | 0.968287827  | 0.33557899  | 0.11219346   | 0.911060114 | 0.752127519  | 0.45511095  |
| PIM1    | -2.816550048 | 0.006002805 | -0.438207226 | 0.662875234 | -1.491816186 | 0.14133606  |
| PIM2    | -1.117706225 | 0.266762824 | -0.849642898 | 0.399041586 | -0.993092048 | 0.324919001 |
| PIM3    | 0.434292448  | 0.665148956 | -0.950744059 | 0.345706954 | -1.556687285 | 0.125155037 |
| PIN1    | -0.050959745 | 0.959474164 | -1.536789388 | 0.129820649 | -0.696057496 | 0.489259648 |
| PIN4    | 1.435290516  | 0.15478204  | -2.098129455 | 0.040290961 | -2.388120079 | 0.020317352 |
| PINK1   | -3.124291746 | 0.002420158 | 1.639893725  | 0.106478258 | 1.16292037   | 0.249772804 |
| PINX1   | 0.568729321  | 0.571001905 | 1.704159128  | 0.093741128 | 2.893749577  | 0.005407753 |
| PION    | 1.950182929  | 0.054367146 | -1.464839745 | 0.148402139 | -1.802985187 | 0.076749175 |
| PIP4K2A | -3.053163826 | 0.003002133 | -0.416081408 | 0.678896764 | 0.441172167  | 0.660779895 |
| PIP4K2B | 0.902268819  | 0.36939994  | 2.368027675  | 0.021261728 | 2.534971985  | 0.014054066 |
| PIP4K2C | -1.830586231 | 0.070578744 | -0.387109468 | 0.700101866 | 0.266114641  | 0.791124169 |
| PIP5K1A | -0.069390841 | 0.94483742  | -0.511429632 | 0.6110054   | -0.744734032 | 0.459533505 |
| PIP5K1B | -2.78218738  | 0.006617601 | -0.372713654 | 0.710729642 | 0.23830603   | 0.81250995  |
| PIP5K1C | -0.385319614 | 0.700939075 | 0.343793864  | 0.73225323  | 0.510653199  | 0.611592712 |
| PIP5KL1 | 0.38314917   | 0.702541746 | -0.488141701 | 0.627302712 | -0.833263414 | 0.4082213   |
| PIPOX   | -0.031955528 | 0.974580555 | 2.315482763  | 0.024169549 | 1.486054851  | 0.142849565 |
| PISD    | -3.060899576 | 0.002933058 | -0.527710811 | 0.599727209 | -0.62789283  | 0.532615707 |
| PITHD1  | -2.743285299 | 0.007382765 | -0.716506135 | 0.47657422  | -0.106054929 | 0.915916176 |
| PITPNA  | -3.560346675 | 0.000602485 | -0.115151283 | 0.908725726 | -0.025172434 | 0.980006536 |
| PITPNB  | -0.210274275 | 0.833944227 | 1.312237564  | 0.194645658 | 1.469005119  | 0.14740343  |
| PITPNC1 | -2.021904215 | 0.046252    | 0.350408678  | 0.727310307 | 1.373332083  | 0.17509986  |
| PITPNM1 | -1.051129337 | 0.296103829 | -0.757611468 | 0.45177216  | -0.643403294 | 0.522577576 |
| PITPNM2 | 1.541667905  | 0.12677608  | -0.419496928 | 0.676413577 | 0.601647888  | 0.549826402 |
| PITPNM3 | 0.508417136  | 0.612444861 | -1.687724704 | 0.096872739 | 0.145184211  | 0.885084539 |
| PITRM1  | 0.11378964   | 0.909666164 | 2.756392833  | 0.00781376  | 3.076588832  | 0.003231656 |
| PIWIL2  | 0.942736836  | 0.348420448 | 0.211059738  | 0.833585639 | -0.296498289 | 0.767941842 |
| PIWIL4  | 0.0271301177 | 0.943321356 | -0.923487641 | 0.359605849 | -2.406551663 | 0.019413268 |
| PJA1    | 1.291033906  | 0.200104541 | 2.291140094  | 0.025632804 | 3.160107647  | 0.002539253 |
| PJA2    | 0.22400119   | 0.823280436 | 0.166960006  | 0.867986304 | -1.425093858 | 0.159656652 |
| PKD1    | 1.932403501  | 0.056556349 | -0.595331482 | 0.553953945 | -0.020608602 | 0.983630826 |
| PKD1L1  | 0.442702149  | 0.659077555 | -0.486349909 | 0.628564548 | -0.074562572 | 0.940827353 |



|           |              |             |              |             |              |              |
|-----------|--------------|-------------|--------------|-------------|--------------|--------------|
| PKD1P1    | 0.493439182  | 0.622942943 | -0.497176884 | 0.620956946 | -0.110273334 | 0.912585197  |
| PKD2      | 1.461668125  | 0.147427069 | -1.47337828  | 0.146093508 | -2.694890105 | 0.009267769  |
| PKDCC     | -0.393480735 | 0.694925007 | -0.632275106 | 0.529709129 | 0.196167941  | 0.845185874  |
| PKDREJ    | 0.233465931  | 0.815946886 | 0.461400133  | 0.646249375 | 0.17761555   | 0.859663128  |
| PKHD1L1   | -1.097467658 | 0.275458713 | 0.923250146  | 0.359728517 | 0.779141451  | 0.439162871  |
| PKI55     | 0.369531649  | 0.712627479 | -0.073571807 | 0.941606018 | 0.2002577418 | 0.050052742  |
| PKIA      | -0.009375921 | 0.992540627 | -0.324328451 | 0.746864325 | -0.198907318 | 0.843052631  |
| PKIG      | -1.077459586 | 0.28424709  | 0.83059779   | 0.40963072  | 1.399848804  | 0.167051171  |
| PKM2      | -1.717198336 | 0.08949321  | 2.614670851  | 0.011380229 | 2.628941715  | 0.011024379  |
| PKMYT1    | 0.021509479  | 0.982888391 | -0.093080617 | 0.92616254  | 1.027789812  | 0.308449198  |
| PKN1      | -1.051583335 | 0.295896577 | 0.736745446  | 0.464267629 | 1.309176168  | 0.195798809  |
| PKN2      | -0.46567961  | 0.642606028 | -1.733681088 | 0.088325113 | -2.46959728  | 0.01658743   |
| PKN3      | 1.312176778  | 0.192904608 | -0.580072143 | 0.564128433 | 0.738699186  | 0.463161611  |
| PKNOX1    | -1.403023653 | 0.164160911 | 0.91450888   | 0.36426223  | 0.995166599  | 0.323918058  |
| PKP2      | -0.831294127 | 0.408078312 | 1.656357328  | 0.103088046 | 0.23946036   | 0.811619246  |
| PKP4      | -1.838631795 | 0.069373954 | 0.85986846   | 0.393426542 | 1.890775762  | 0.063810155  |
| PLA2G12A  | -0.969767817 | 0.334844792 | -0.801181577 | 0.426319361 | -1.578355249 | 0.120093021  |
| PLA2G15   | 1.161188478  | 0.248734487 | 2.706730296  | 0.008926321 | 3.63141563   | 0.000610431  |
| PLA2G16   | -0.801260356 | 0.425159158 | -0.173854102 | 0.862589732 | 1.109840653  | 0.271790943  |
| PLA2G2D   | 1.829033727  | 0.070813223 | 0.734138768  | 0.465842378 | 0.953213488  | 0.34456121   |
| PLA2G4A   | 2.652234019  | 0.00949884  | -0.038368793 | 0.969526325 | 0.114116055  | 0.909552238  |
| PLA2G4C   | -0.923069986 | 0.358518182 | -0.222098739 | 0.825022668 | -0.105511485 | 0.916345408  |
| PLA2G6    | 1.338315587  | 0.184273252 | -1.070578032 | 0.288825049 | -0.210890889 | 0.833734733  |
| PLA2G7    | -1.833268613 | 0.070175142 | 1.283092455  | 0.204598699 | 0.736872128  | 0.46426325   |
| PLAA      | -1.212995852 | 0.228407588 | 2.202579488  | 0.031640843 | 1.879192447  | 0.050403752  |
| PLAC2     | 0.2206186    | 0.825905212 | -0.4149836   | 0.679695666 | 0.666615296  | 0.0657743664 |
| PLAC4     | -0.396141863 | 0.69296817  | -0.494514812 | 0.622823648 | -0.338694432 | 0.736101303  |
| PLAC8     | 1.860201702  | 0.066228472 | -0.545667339 | 0.587401839 | 0.542223222  | 0.589806978  |
| PLAC8L1   | -0.590943022 | 0.556087447 | 1.295586725  | 0.200286332 | 1.675028298  | 0.099481344  |
| PLAG1     | 0.974813455  | 0.332349657 | -0.887240992 | 0.378639113 | 0.361943743  | 0.340195895  |
| PLAGL1    | -2.529141523 | 0.013232863 | -2.43826765  | 0.017864124 | -3.707954864 | 0.00047963   |
| PLAGL2    | -0.918987298 | 0.360637637 | -0.900969312 | 0.371356627 | -0.490569328 | 0.62563983   |
| PLAT      | -1.128392639 | 0.262249506 | -0.690602454 | 0.492589196 | 0.925778257  | 0.358517124  |
| PLAU      | -1.970074156 | 0.052003573 | 0.594739403  | 0.554347001 | -0.143528762 | 0.886385669  |
| PLAUR     | -3.448151485 | 0.00087127  | 1.061896011  | 0.292715235 | -0.11883417  | 0.90583021   |
| PLB1      | 0.527409671  | 0.599248656 | 1.904351367  | 0.061863126 | 1.163855752  | 0.249396609  |
| PLBD1     | -2.996786604 | 0.003552976 | -0.670115218 | 0.505462298 | -0.722980156 | 0.472688339  |
| PLBD2     | 0.804673433  | 0.423196931 | 0.261518279  | 0.794625785 | 0.589573511  | 0.557837935  |
| PLCB1     | -0.924427298 | 0.357815326 | -0.745167052 | 0.459200795 | -1.647302172 | 0.105073081  |
| PLCB2     | -2.172417474 | 0.032537789 | -0.220990907 | 0.825881069 | 0.441716551  | 0.660388225  |
| PLCB3     | 0.481421873  | 0.631422782 | 1.590284869  | 0.117245069 | 1.838815395  | 0.071224507  |
| PLCD1     | 0.745446877  | 0.458006521 | 1.30294642   | 0.197778219 | 1.741968641  | 0.086981164  |
| PLCD3     | 0.394854953  | 0.693914228 | 1.601828188  | 0.114664502 | 0.857732122  | 0.394681199  |
| PLCD4     | 0.639212348  | 0.524360637 | 1.26018759   | 0.212683577 | 2.490803941  | 0.015723759  |
| PLCG1     | 1.85618257   | 0.066805341 | 1.130691724  | 0.262871218 | 2.109598979  | 0.039356418  |
| PLCG2     | -2.42439086  | 0.017398882 | 0.841236633  | 0.403694498 | 0.247912725  | 0.805104922  |
| PLCH2     | 1.526396923  | 0.130530612 | -1.339388352 | 0.18570578  | -0.460550196 | 0.646897352  |
| PLCL1     | 2.647126636  | 0.009632439 | 0.355334021  | 0.723637377 | 1.091032576  | 0.279911085  |
| PLCL2     | -2.652933982 | 0.009480662 | 3.203738734  | 0.002211891 | 2.503980114  | 0.015207809  |
| PLCXD1    | 1.39565941   | 0.166361289 | 1.923564935  | 0.059356432 | 2.652276074  | 0.01037078   |
| PLCXD2    | 0.747866908  | 0.456552877 | -1.521554283 | 0.133592298 | -2.296994181 | 0.025364302  |
| PLD1      | -1.469680801 | 0.145247522 | 0.355551495  | 0.723475352 | 0.821887308  | 0.414612056  |
| PLD2      | 0.389377879  | 0.697946059 | 0.29382901   | 0.769944809 | 1.054210736  | 0.296294769  |
| PLD3      | -0.959806436 | 0.339806782 | 1.313951543  | 0.194071883 | 0.624266547  | 0.534976955  |
| PLD4      | 1.262489132  | 0.210139161 | 0.859575731  | 0.3935866   | 1.145952947  | 0.256667575  |
| PLD6      | 3.300080014  | 0.001401299 | 2.015062196  | 0.048573888 | 3.265296435  | 0.001864641  |
| PLDN      | 0.361395556  | 0.718678052 | 0.103361951  | 0.918034768 | -0.568364592 | 0.572050073  |
| PLEC      | 1.627797025  | 0.107176471 | -0.951363299 | 0.345395318 | 0.138840526  | 0.890072167  |
| PLEK      | -2.056142661 | 0.042758934 | -0.656465043 | 0.514139254 | -1.144700538 | 0.257181822  |
| PLEK2     | -2.445633854 | 0.016469867 | 1.242396349  | 0.219125054 | 0.80721669   | 0.422942669  |
| PLEKHA1   | 1.655510363  | 0.101416222 | -1.471959569 | 0.1464761   | -1.282741864 | 0.204844363  |
| PLEKHA2   | -1.588063477 | 0.115891993 | 2.072644069  | 0.042690846 | 1.755026353  | 0.084701177  |
| PLEKHA3   | -0.469615607 | 0.639802041 | -1.192893958 | 0.237801909 | -2.313554444 | 0.024371596  |
| PLEKHA4   | 0.242872866  | 0.808674338 | 1.501801426  | 0.138611306 | 1.940433426  | 0.057346623  |
| PLEKHA5   | 1.960752656  | 0.053100088 | -0.674229619 | 0.502862516 | -0.408240992 | 0.684647005  |
| PLEKHA6   | 2.342383752  | 0.02143876  | 0.506693196  | 0.614304425 | -0.328918052 | 0.743439412  |
| PLEKHA7   | 1.279997068  | 0.203941396 | -1.098032205 | 0.276759548 | -0.023566162 | 0.981282085  |
| PLEKHA8   | 0.973694668  | 0.332901855 | -0.789959718 | 0.432791622 | -2.190890993 | 0.032619788  |
| PLEKHA8P1 | -0.132637866 | 0.894785417 | 2.609075512  | 0.011547564 | 2.519281988  | 0.014627865  |
| PLEKHB1   | 1.07821003   | 0.283914017 | 0.532498145  | 0.596429447 | 1.478756871  | 0.144785051  |
| PLEKHB2   | -1.903790309 | 0.06023607  | 1.475045633  | 0.145646001 | 0.72015284   | 0.474413555  |
| PLEKHD1   | 3.804737522  | 0.000262999 | -0.529071488 | 0.598789043 | -0.550065614 | 0.584452582  |

|          |              |             |              |             |              |             |
|----------|--------------|-------------|--------------|-------------|--------------|-------------|
| PLEKHF1  | -0.369663565 | 0.712529527 | -2.597950668 | 0.011886937 | -1.841652068 | 0.070801789 |
| PLEKHF2  | -0.345689179 | 0.730409012 | 0.961264877  | 0.340437283 | -0.222603896 | 0.824650317 |
| PLEKHG1  | -0.959627637 | 0.339896283 | 0.780381302  | 0.438361914 | 1.188542431  | 0.23961469  |
| PLEKHG2  | 1.449982207  | 0.15065127  | -1.268716129 | 0.20964596  | 0.746626009  | 0.458399436 |
| PLEKHG3  | -2.396414685 | 0.018693554 | -0.990309786 | 0.326164923 | -0.314288774 | 0.754464733 |
| PLEKHG4  | 3.284144992  | 0.001473639 | -0.465952987 | 0.643006497 | 0.123028444  | 0.902523208 |
| PLEKHG5  | 2.031622606  | 0.045236497 | -0.585885041 | 0.560241687 | -0.277368582 | 0.782514179 |
| PLEKHG6  | -0.709410083 | 0.479962846 | -0.632163603 | 0.529781463 | -0.448944752 | 0.655196809 |
| PLEKHG7  | 0.625776839  | 0.533096021 | -1.021267627 | 0.311398203 | -0.595751764 | 0.55373129  |
| PLEKHH1  | -0.812337929 | 0.418810205 | 0.554393568  | 0.581455896 | 0.897278838  | 0.373395459 |
| PLEKHH2  | 1.53678651   | 0.127966811 | -0.004113944 | 0.996731773 | 0.190271343  | 0.849781684 |
| PLEKHH3  | -0.402142782 | 0.688563103 | 0.44933091   | 0.654879272 | 0.034261342  | 0.97279007  |
| PLEKHJ1  | -0.175232241 | 0.861303458 | 1.367304733  | 0.176842266 | 1.547428368  | 0.127369533 |
| PLEKHM1  | -2.762045238 | 0.007004225 | -0.004408932 | 0.996497428 | -0.294991559 | 0.769086642 |
| PLEKHM1P | 0.687677957  | 0.493480966 | -2.083637082 | 0.041640856 | -2.503997654 | 0.015207133 |
| PLEKHM2  | -1.247350352 | 0.21560912  | -0.691547254 | 0.491999914 | -0.391545464 | 0.696873813 |
| PLEKHM3  | 0.046089503  | 0.963344314 | 0.280154167  | 0.780362983 | -0.248717898 | 0.804485084 |
| PLEKHN1  | 0.447733221  | 0.655456225 | 1.13348599   | 0.261706304 | 0.777826451  | 0.439931493 |
| PLEKHO1  | -2.418958821 | 0.017643823 | 0.506444996  | 0.614477523 | 0.30883015   | 0.758591953 |
| PLEKHO2  | -3.069980518 | 0.002853855 | 0.174726222  | 0.861907515 | -0.038927145 | 0.969086338 |
| PLIN2    | -1.166489364 | 0.246597377 | 3.357531715  | 0.00139845  | 2.107444333  | 0.039550381 |
| PLIN3    | -1.6421352   | 0.104164171 | 1.588803789  | 0.117579532 | 0.741724392  | 0.461340833 |
| PLIN4    | -0.387559657 | 0.69928643  | 0.337120314  | 0.737251622 | 0.221690833  | 0.825357625 |
| PLIN5    | -0.696816938 | 0.487771071 | -0.786909416 | 0.434560936 | -1.170588511 | 0.246700803 |
| PLK1     | 1.539217047  | 0.127372823 | -0.151930196 | 0.879772929 | 1.440836242  | 0.155175836 |
| PLK1S1   | 0.835962363  | 0.405461224 | -0.082330143 | 0.934669636 | -0.284100792 | 0.777376576 |
| PLK2     | -0.798206718 | 0.426919311 | 0.432316255  | 0.667125898 | 0.281023611  | 0.779723664 |
| PLK3     | 0.177802235  | 0.859290733 | -1.308353223 | 0.195950712 | -0.737295927 | 0.464007583 |
| PLK4     | 0.28288642   | 0.777934431 | -1.296702286 | 0.199904635 | -1.258029855 | 0.213579415 |
| PLLP     | 2.120220968  | 0.036828455 | 1.044728942  | 0.300513217 | 1.426252981  | 0.159323336 |
| PLN      | 0.430551075  | 0.667857275 | 0.388550502  | 0.699041285 | -0.618233404 | 0.538917403 |
| PLOD1    | -2.755841828 | 0.00712739  | 1.359824096  | 0.179185048 | 1.378766534  | 0.173426558 |
| PLOD3    | -0.124563736 | 0.901155679 | 1.114302622  | 0.269777699 | 0.765605865  | 0.447112277 |
| PLP2     | -2.201743823 | 0.030323593 | -1.112267507 | 0.270644147 | -1.374638631 | 0.17469644  |
| PLRG1    | 1.428229562  | 0.15679821  | 0.241225076  | 0.81023737  | 1.419032577  | 0.161408456 |
| PLS1     | 0.610118934  | 0.543369987 | 0.126691179  | 0.899626075 | -0.903822119 | 0.369945221 |
| PLS3     | -0.756115412 | 0.451618102 | 1.321296691  | 0.191627433 | 1.861934886  | 0.067840411 |
| PLSCR1   | -1.212408897 | 0.228630937 | 0.249062208  | 0.80419869  | -2.570771619 | 0.012820465 |
| PLSCR3   | 0.606811665  | 0.545552816 | -3.950943095 | 0.000214921 | -4.841311253 | 1.05E-05    |
| PLTP     | -0.817004564 | 0.416152669 | -0.493181399 | 0.623759603 | 0.808164559  | 0.422401405 |
| PLVAP    | -1.983329852 | 0.050477489 | 1.095860699  | 0.277700846 | -0.087747063 | 0.930389427 |
| PLXDC1   | 2.062295969  | 0.042155825 | -1.793838633 | 0.078088541 | 0.718984612  | 0.475127438 |
| PLXDC2   | -1.909039669 | 0.05954625  | -0.170598175 | 0.865137608 | -0.946217733 | 0.348085608 |
| PLXNA1   | 2.847417474  | 0.005495645 | 0.70440269   | 0.484020538 | 1.492606568  | 0.141129416 |
| PLXNA2   | -3.248444791 | 0.001648603 | -1.065071842 | 0.291288061 | -1.343062817 | 0.184647043 |
| PLXNA3   | 1.717278308  | 0.089478532 | -0.47271771  | 0.638201041 | 0.432271127  | 0.667197432 |
| PLXNA4   | 1.558453773  | 0.122748307 | 1.893991833  | 0.0632516   | 1.538986204  | 0.12941586  |
| PLXNB1   | 1.126550315  | 0.263023745 | 0.054018106  | 0.957107672 | -0.213028192 | 0.832075336 |
| PLXNB2   | 0.093200204  | 0.925958342 | 0.521081374  | 0.604307841 | 0.418958627  | 0.676842284 |
| PLXNB3   | -1.427750516 | 0.156935726 | 0.411576532  | 0.68217742  | -0.382894446 | 0.703241502 |
| PLXNC1   | -1.221143549 | 0.225323529 | -0.604609968 | 0.547812703 | -1.683566263 | 0.097809343 |
| PLXND1   | 0.218128709  | 0.82783855  | 0.471701529  | 0.638921917 | 0.552672247  | 0.582678058 |
| PM20D1   | 0.527291484  | 0.599330367 | 0.25009661   | 0.803402548 | -1.069236961 | 0.289530972 |
| PM20D2   | 1.596224824  | 0.114057003 | -0.068304041 | 0.945780182 | -1.934623957 | 0.058072721 |
| PMAIP1   | -0.656845457 | 0.513010348 | -0.051160533 | 0.959374618 | -0.558968938 | 0.578402127 |
| PMEL     | 0.910072977  | 0.365293079 | 0.617025448  | 0.539649533 | 1.054571476  | 0.296131126 |
| PMEPA1   | 0.662241419  | 0.509563207 | 1.715997498  | 0.091537318 | 1.734705512  | 0.088271233 |
| PMF1     | -2.511213116 | 0.01387518  | 0.820973658  | 0.415046395 | 1.949937654  | 0.05617545  |
| PMFBP1   | 0.292623341  | 0.77050532  | 0.478708208  | 0.633958547 | 0.058279469  | 0.953732615 |
| PML      | -1.77043879  | 0.080149382 | -0.351826268 | 0.726252517 | -1.922493244 | 0.0596142   |
| PMM1     | 0.198955647  | 0.84276066  | 2.341128506  | 0.022708796 | 2.536896298  | 0.013985114 |
| PMM2     | -0.667720134 | 0.506075861 | -0.271605716 | 0.786896371 | -1.521676991 | 0.133693437 |
| PMP22    | 0.49313047   | 0.623160152 | 0.135089926  | 0.893011773 | -0.928892449 | 0.35691485  |
| PMPCA    | 0.48274204   | 0.630488781 | 1.764601137  | 0.082932811 | 2.339961435  | 0.022860038 |
| PMPCB    | 0.900928807  | 0.370108035 | 0.139581631  | 0.889477501 | 0.617127456  | 0.539641351 |
| PMS1     | 1.586839802  | 0.116169147 | -0.726416495 | 0.470525392 | -1.643551197 | 0.105848875 |
| PMS2     | 1.458514001  | 0.148291974 | 0.183340383  | 0.855174839 | 1.451747642  | 0.152128041 |
| PMS2CL   | 0.701374791  | 0.484937004 | 0.365979088  | 0.715721506 | 2.036197322  | 0.046450391 |
| PMS2P1   | 1.299860693  | 0.19707478  | -0.336157778 | 0.737973495 | 0.545825887  | 0.587344375 |
| PMS2P3   | 2.702874142  | 0.008262349 | -1.475096891 | 0.145632261 | -0.840863203 | 0.403985725 |
| PMS2P4   | -0.299682858 | 0.765132343 | -1.529395292 | 0.131640426 | -0.964156213 | 0.339095418 |
| PMS2P5   | 2.1341343    | 0.035639319 | -0.336272151 | 0.737887706 | -1.990914675 | 0.051357382 |

|         |              |             |              |             |              |             |
|---------|--------------|-------------|--------------|-------------|--------------|-------------|
| PMVK    | -0.58259906  | 0.561666929 | 1.822274968  | 0.07360607  | 1.94298395   | 0.057030301 |
| PNISR   | 2.40707394   | 0.018190486 | -1.216713378 | 0.228675658 | -1.827320123 | 0.072959329 |
| PNKD    | -1.511937513 | 0.134165975 | 0.443930547  | 0.65875618  | 0.274958308  | 0.784355933 |
| PNKP    | 0.750029995  | 0.455255808 | -0.700765672 | 0.486270705 | -0.785054268 | 0.435716614 |
| PNLDC1  | 0.13882376   | 0.889909563 | 0.970087907  | 0.336058933 | -1.847570085 | 0.069926689 |
| PNMA1   | 0.478236235  | 0.633679042 | -0.164193146 | 0.870153944 | -0.849184158 | 0.399379328 |
| PNMA3   | 2.919842297  | 0.004456333 | 1.936808     | 0.057679475 | 2.824168019  | 0.006546336 |
| PNMA5   | 1.013792091  | 0.313487065 | 0.536724802  | 0.593524971 | 0.412675645  | 0.681413378 |
| PNMAL1  | 0.843477818  | 0.401269434 | -0.169820575 | 0.865746321 | 1.061460317  | 0.293018053 |
| PNMAL2  | -1.262501576 | 0.210134707 | 0.111632675  | 0.911502788 | 0.676748741  | 0.501339625 |
| PNN     | 2.235247572  | 0.027956175 | 0.301002233  | 0.764496746 | 0.607683201  | 0.545843816 |
| PNO1    | 1.182055438  | 0.240397492 | -0.523341568 | 0.602744341 | 0.602084864  | 0.549537557 |
| PNOC    | -1.757799365 | 0.082291316 | 0.97576255   | 0.333262679 | 2.278439301  | 0.026519113 |
| PNP     | 0.68300497   | 0.496414585 | 0.501944807  | 0.617619834 | 1.217683422  | 0.228428984 |
| PNPLA1  | -2.982620383 | 0.003705388 | 0.860903654  | 0.392860848 | -0.456853381 | 0.649536247 |
| PNPLA2  | -0.698051694 | 0.487002404 | -1.171142247 | 0.246363965 | -0.49781693  | 0.620554212 |
| PNPLA4  | 0.129910452  | 0.89693652  | -0.884279782 | 0.380221704 | -0.434397677 | 0.66566192  |
| PNPLA6  | -0.498976757 | 0.619052397 | 0.862272756  | 0.392113464 | 0.470843219  | 0.63957396  |
| PNPLA7  | 1.451316623  | 0.150280355 | 1.527664301  | 0.132069361 | 2.195289867  | 0.032286055 |
| PNPLA8  | -0.038312219 | 0.969526336 | -0.215051506 | 0.830486821 | -0.923828532 | 0.359522633 |
| PNPO    | 0.957448068  | 0.340988526 | 2.600220487  | 0.011816966 | 5.183074389  | 3.07E-06    |
| PNPT1   | 0.41796079   | 0.677003366 | -0.124560832 | 0.901304954 | -1.798541533 | 0.077458715 |
| PNRC1   | -1.674225537 | 0.097670052 | 0.046700792  | 0.962913251 | -0.894663856 | 0.374780028 |
| PNRC2   | 0.383632831  | 0.70218449  | 0.311526656  | 0.756525122 | -0.326541081 | 0.745227209 |
| POC1A   | 1.675787036  | 0.097362642 | 1.463697322  | 0.148713182 | 1.259507919  | 0.213049316 |
| POC1B   | -0.538321114 | 0.591727031 | -0.785869007 | 0.4351654   | -1.296592291 | 0.200066699 |
| POC5    | 1.325425182  | 0.188492775 | -0.141460447 | 0.88799983  | 0.392079598  | 0.696481369 |
| PODN    | 0.356230756  | 0.722528321 | -1.642117624 | 0.106015078 | -1.053756942 | 0.296500712 |
| PODNL1  | 1.016717061  | 0.312101094 | 0.23204656   | 0.817324356 | 0.269406639  | 0.788602816 |
| PODXL   | -0.801779073 | 0.424860592 | -0.550016538 | 0.584434739 | 0.652063486  | 0.517016556 |
| PODXL2  | -1.337076528 | 0.184675727 | 0.014449893  | 0.988520992 | -0.014221905 | 0.988703279 |
| POFUT1  | -0.312592527 | 0.755336683 | 1.468988096  | 0.147276969 | 1.94085345   | 0.057294428 |
| POFUT2  | 1.0171523    | 0.311895211 | -2.368537576 | 0.021235112 | -1.364987403 | 0.177693284 |
| POGK    | 1.777317039  | 0.079003257 | -0.081316648 | 0.93547205  | 0.389385553  | 0.698461611 |
| POGLUT1 | 0.604668075  | 0.546969966 | -0.772714658 | 0.442850747 | -1.086420773 | 0.28192776  |
| POGZ    | 1.148733151  | 0.253807748 | -0.827584098 | 0.411321925 | 0.014420153  | 0.988545818 |
| POLA1   | -0.051299454 | 0.959204249 | 1.664978722  | 0.101348158 | 2.22268257   | 0.030274649 |
| POLA2   | -0.14755638  | 0.883033573 | 2.466616487  | 0.01663712  | 3.2935367    | 0.001714661 |
| POLB    | -2.419790447 | 0.017606126 | -0.657570549 | 0.513433574 | -0.526173275 | 0.600836853 |
| POLD1   | 0.322355142  | 0.747955346 | 0.729814222  | 0.468461631 | 1.36824929   | 0.176676055 |
| POLD2   | 0.139474572  | 0.889396822 | 0.61466379   | 0.541197496 | 1.827731012  | 0.072896712 |
| POLD3   | -2.788959244 | 0.006492067 | 0.978511028  | 0.331913885 | 0.71312338   | 0.478718254 |
| POLD4   | -0.907170485 | 0.366817088 | 0.762163684  | 0.449072253 | 0.996882872  | 0.323091539 |
| POLDIP2 | -1.144579099 | 0.255515947 | 3.077230489  | 0.003195848 | 3.974262039  | 0.000203357 |
| POLDIP3 | -1.941121498 | 0.055473737 | 0.928012323  | 0.357273955 | 0.592347779  | 0.555992015 |
| POLE    | 2.114421839  | 0.037334153 | 0.834787418  | 0.407286674 | 1.221633274  | 0.226942711 |
| POLE2   | 1.142100887  | 0.256538882 | -0.45149933  | 0.653325245 | -0.817032255 | 0.417357876 |
| POLE3   | -1.242090164 | 0.217533955 | -0.557424802 | 0.579397231 | 1.196164211  | 0.236651475 |
| POLE4   | -0.71806967  | 0.474634063 | -0.146571357 | 0.883982184 | 0.144808253  | 0.885380002 |
| POLG    | 1.315467869  | 0.191801505 | -0.279151278 | 0.781128655 | 0.625195095  | 0.534371817 |
| POLG2   | 2.217223999  | 0.029208793 | 0.690112249  | 0.492895095 | 1.170076043  | 0.246905256 |
| POLH    | -0.620067065 | 0.536830896 | 1.876496867  | 0.065656416 | 2.424671267  | 0.018559835 |
| POLI    | 0.890524035  | 0.37563532  | -1.807116067 | 0.075967974 | -2.893593599 | 0.005410086 |
| POLK    | 0.985981464  | 0.326870491 | -1.265163727 | 0.210907282 | -2.320031071 | 0.023992856 |
| POLL    | -1.835833411 | 0.069791037 | 0.833048346  | 0.408258666 | 0.360018407  | 0.720181944 |
| POLM    | 1.796192174  | 0.075927591 | -1.362927744 | 0.17821019  | -0.218639944 | 0.827722061 |
| POLN    | 0.562846871  | 0.574983634 | -0.16601063  | 0.868729959 | -0.913882018 | 0.364680505 |
| POLQ    | 0.652676002  | 0.515682391 | -0.488871411 | 0.626789148 | 0.279434991  | 0.780936176 |
| POLR1A  | 0.988698314  | 0.325546647 | 0.539601615  | 0.59155189  | 1.257288011  | 0.213845842 |
| POLR1B  | 1.976344731  | 0.051276837 | 1.941869586  | 0.057049292 | 2.113112515  | 0.039041905 |
| POLR1C  | 1.39114923   | 0.167719992 | -0.664908058 | 0.508762953 | 1.042836246  | 0.301486464 |
| POLR1D  | -3.479171011 | 0.000787382 | -0.158007182 | 0.875003808 | -0.109339111 | 0.913322753 |
| POLR1E  | 2.088305668  | 0.039686729 | 2.703476376  | 0.009004058 | 4.110619236  | 0.000129658 |
| POLR2A  | -1.007551515 | 0.316457861 | -0.267289846 | 0.790200783 | -0.10701628  | 0.915156929 |
| POLR2B  | 2.320099194  | 0.022671291 | 0.211395989  | 0.833324503 | 0.343202733  | 0.732725653 |
| POLR2C  | -1.30625569  | 0.194901156 | -2.01490013  | 0.048591386 | -0.79642553  | 0.429134126 |
| POLR2D  | 0.613313884  | 0.541265497 | -0.133098758 | 0.894579214 | 1.190718231  | 0.23876605  |
| POLR2E  | -2.120384742 | 0.036814261 | -0.884173836 | 0.380278403 | -1.059410718 | 0.293941902 |
| POLR2F  | -1.140016527 | 0.257401483 | -2.35603948  | 0.021896149 | -1.523618889 | 0.133208017 |
| POLR2G  | -0.935936179 | 0.351891184 | -0.322349273 | 0.748355279 | 0.298545237  | 0.766387423 |
| POLR2H  | 1.724602597  | 0.088142617 | 0.411858027  | 0.681972242 | 1.626804646  | 0.109369561 |
| POLR2I  | -1.056857889 | 0.293495965 | -3.40524522  | 0.001210133 | -1.629350347 | 0.10882832  |

|             |              |             |              |             |              |             |
|-------------|--------------|-------------|--------------|-------------|--------------|-------------|
| POLR2J      | -2.112218663 | 0.037527845 | -2.223161368 | 0.030143521 | -2.421997541 | 0.01868361  |
| POLR2J2     | -0.606636464 | 0.545668574 | -2.717144786 | 0.008681632 | -5.199588928 | 2.89E-06    |
| POLR2J3     | -0.302297029 | 0.763145603 | -0.63325144  | 0.529075979 | 0.349786369  | 0.72780561  |
| POLR2J4     | 0.026274432  | 0.979098492 | -2.167501285 | 0.034343937 | -0.970959587 | 0.335726147 |
| POLR2K      | 0.362484061  | 0.717867512 | -1.676280216 | 0.099103825 | -1.27635135  | 0.207077261 |
| POLR2L      | -0.665949191 | 0.507201714 | -0.754013187 | 0.453912942 | -0.447806151 | 0.656013445 |
| POLR3A      | 1.497184966  | 0.13795665  | 2.440449534  | 0.017766874 | 2.156772879  | 0.035312849 |
| POLR3B      | 0.969869939  | 0.33479417  | 1.587121934  | 0.117960267 | 1.815065824  | 0.074847657 |
| POLR3C      | -0.655279364 | 0.514013135 | 1.407269875  | 0.164721147 | 1.353720715  | 0.181241293 |
| POLR3D      | 2.82718046   | 0.005823492 | 2.090196155  | 0.041025117 | 1.806503446  | 0.076191264 |
| POLR3E      | 3.117537471  | 0.002470538 | -1.700315734 | 0.094465929 | -1.777255462 | 0.080934069 |
| POLR3F      | 2.464746985  | 0.015672146 | -0.130705883 | 0.896463435 | 0.072847083  | 0.942186282 |
| POLR3G      | 1.220109818  | 0.225713132 | -0.794115086 | 0.430388216 | -1.161418746 | 0.250377582 |
| POLR3GL     | 0.742376626  | 0.459854531 | -0.828489101 | 0.410813615 | -0.643989069 | 0.522200436 |
| POLR3H      | 0.416235701  | 0.678260361 | 2.212930512  | 0.030879819 | 2.266738403  | 0.027271106 |
| POLR3K      | 0.124726863  | 0.901026911 | 0.620598929  | 0.537311607 | 0.979827703  | 0.331367681 |
| POLRMT      | 1.895458895  | 0.061344735 | -0.30959512  | 0.757986184 | -0.217118184 | 0.828902024 |
| POM121      | 0.229561099  | 0.818970514 | 0.208277779  | 0.835746852 | 0.717885113  | 0.475799875 |
| POM121C     | -0.45883081  | 0.647497437 | 0.527213327  | 0.600070387 | 0.984383409  | 0.329143331 |
| POM121L10P  | -0.374801403 | 0.708718284 | 1.422676262  | 0.160223713 | 0.646561742  | 0.520545773 |
| POMC        | 0.269708783  | 0.788021606 | 0.243796094  | 0.808255048 | -0.463502226 | 0.644793375 |
| POMGNT1     | 2.199891208  | 0.030459469 | 0.063832855  | 0.949324341 | 1.712805275  | 0.092257309 |
| POMP        | -1.423393072 | 0.158190858 | -0.51668802  | 0.607352296 | 0.344315138  | 0.731893539 |
| POMT1       | 2.037062079  | 0.0446765   | 0.753980428  | 0.453932458 | 1.180910471  | 0.242608687 |
| POMT2       | 3.437890026  | 0.000900828 | -0.499475602 | 0.619347047 | 0.834827706  | 0.407347263 |
| POMZP3      | 0.081019369  | 0.935612239 | 2.614863045  | 0.01137452  | 2.986647653  | 0.004172542 |
| PON2        | 0.747844952  | 0.456566054 | -1.555775936 | 0.125239564 | -0.661530385 | 0.510973717 |
| POP1        | 0.194186575  | 0.846481521 | 1.088076333  | 0.281093561 | 2.904541499  | 0.005248567 |
| POP4        | -0.265133757 | 0.791532254 | 0.713147516  | 0.478634043 | 2.379319004  | 0.020762212 |
| POP5        | 1.715199505  | 0.089860703 | -0.445510479 | 0.65762097  | 0.662014781  | 0.510665543 |
| POP7        | -0.545088777 | 0.587084127 | -0.511738999 | 0.6107902   | -0.117963957 | 0.906516546 |
| POPDC2      | 1.581500309  | 0.11738471  | -1.054165746 | 0.296209218 | 0.967950608  | 0.337213561 |
| POR         | -1.445743354 | 0.151834211 | 0.649325815  | 0.51870889  | 0.566700009  | 0.573172951 |
| PORCN       | -0.387004563 | 0.69969583  | -0.644199431 | 0.522003392 | -0.175562627 | 0.861268191 |
| POT1        | 0.504144562  | 0.615431406 | -0.16686915  | 0.868057467 | -0.501799256 | 0.617676714 |
| POU2AF1     | 0.697942783  | 0.487070177 | 0.994675177  | 0.324054812 | 1.49868947   | 0.139547029 |
| POU2F1      | 0.356015881  | 0.722688662 | -0.346388134 | 0.730313288 | -0.404907576 | 0.687081558 |
| POU2F2      | 1.231738915  | 0.221358383 | -0.759372865 | 0.450726365 | -0.38190664  | 0.703969961 |
| POU5F1      | 0.024602964  | 0.980427877 | 1.922603115  | 0.059479828 | 1.543822756  | 0.128240326 |
| POU5F1B     | -0.014232434 | 0.988677061 | 1.468426892  | 0.147428794 | 2.014851711  | 0.048710603 |
| POU5F1P3    | -0.198173657 | 0.843370532 | 0.237837919  | 0.812850863 | 1.159998327  | 0.250950621 |
| POU6F1      | 3.780362368  | 0.000286101 | 1.12731071   | 0.264285649 | 2.200502908  | 0.031894446 |
| PP7080      | 1.343392172  | 0.182631155 | 1.344257926  | 0.18413586  | 1.96096106   | 0.054842746 |
| PPA1        | 0.612169489  | 0.542018825 | 2.682115343  | 0.009529972 | 3.444040698  | 0.001089548 |
| PPA2        | 1.399490371  | 0.165213829 | 0.675368119  | 0.50214441  | 1.620234159  | 0.110776613 |
| PPAN        | 1.150721323  | 0.252993054 | 0.040054714  | 0.968188027 | 1.136096615  | 0.260734502 |
| PPAN-P2RY11 | 1.473492466  | 0.144219552 | 1.662523117  | 0.101841263 | 1.852785466  | 0.069163061 |
| PPAP2A      | 1.681341841  | 0.096275449 | -0.770683045 | 0.444044766 | -1.030170159 | 0.307340478 |
| PPAP2B      | 0.3846397    | 0.701440983 | 3.002468774  | 0.003956304 | 0.945001928  | 0.348700512 |
| PPAP2C      | 0.428627713  | 0.669251283 | -1.835012141 | 0.071669426 | -0.879307205 | 0.0653878   |
| PPAPDC1B    | 1.224305417  | 0.224134886 | 0.183256172  | 0.855240605 | 0.886272743  | 0.379244887 |
| PPAPDC2     | 1.335578168  | 0.185163313 | -2.462205076 | 0.016822926 | -1.774875791 | 0.081330553 |
| PPAPDC3     | -1.59584636  | 0.114141579 | 1.176847357  | 0.244097114 | 0.245379551  | 0.807055831 |
| PPARA       | -0.205143685 | 0.837938045 | -0.918769695 | 0.362047771 | -0.520974077 | 0.604430271 |
| PPARD       | 0.16740933   | 0.867435663 | 0.37314778   | 0.710408288 | 1.39993108   | 0.167026649 |
| PPARGC1A    | -0.706229166 | 0.481928566 | 0.401155164  | 0.689790311 | 1.849473608  | 0.069647159 |
| PPARGC1B    | 3.996091571  | 0.00013427  | -1.039562934 | 0.302887393 | -0.640002998 | 0.524769624 |
| PPAT        | 2.342913713  | 0.021410186 | -0.222970777 | 0.824347121 | -0.529824343 | 0.598319361 |
| PPBP        | -3.97543668  | 0.000144513 | 1.783947528  | 0.079700221 | 0.773744624  | 0.442322375 |
| PPCDC       | -1.316492065 | 0.191459182 | 0.499667442  | 0.619212777 | 0.819889209  | 0.415740769 |
| PPCS        | -0.27675301  | 0.782624794 | -1.249275687 | 0.216617482 | -1.012385813 | 0.315689693 |
| PPDPF       | -1.124070166 | 0.264068563 | -2.475733696 | 0.016258957 | -2.159016671 | 0.035129931 |
| PPFE1       | 1.098752762  | 0.274900759 | -1.965158834 | 0.054224919 | -0.716762418 | 0.47648705  |
| PPFIA1      | -0.849119693 | 0.398140104 | -0.507635411 | 0.613647511 | -0.540813579 | 0.590771868 |
| PPFIA3      | 2.121684706  | 0.036701756 | -2.172941873 | 0.033911852 | 0.027983216  | 0.977774606 |
| PPFIA4      | 1.971413002  | 0.051847674 | 2.521778308  | 0.014464995 | 1.256960164  | 0.213963664 |
| PPFIBP1     | 1.943325827  | 0.0552028   | 0.879829414  | 0.382607995 | 0.853274892  | 0.397126683 |
| PPFIBP2     | -1.068939451 | 0.288047482 | 2.33312495   | 0.02315599  | 1.789419068  | 0.078932543 |
| PPHLN1      | 0.658123849  | 0.512192548 | -0.988023265 | 0.327273815 | -0.225219986 | 0.822624564 |
| PPIA        | 1.34964469   | 0.180623881 | -1.183379664 | 0.241520091 | -0.283951768 | 0.777490195 |
| PPIB        | -0.530600982 | 0.597044221 | 0.064079181  | 0.949129059 | 0.901057021  | 0.371400754 |
| PPID        | -1.743018935 | 0.084855735 | 2.097319912  | 0.04036535  | 1.58239868   | 0.119166879 |

|             |              |             |              |             |              |             |
|-------------|--------------|-------------|--------------|-------------|--------------|-------------|
| PPIE        | 1.070134133  | 0.287512504 | 1.563951227  | 0.123307269 | 1.899513787  | 0.062629903 |
| PPIEL       | 2.232871347  | 0.028118578 | -0.099255728 | 0.921279883 | 0.909772901  | 0.366825124 |
| PPIF        | -0.724592616 | 0.47064201  | 2.088132041  | 0.041218029 | 1.521178586  | 0.133818251 |
| PPIG        | 0.491632685  | 0.624214464 | -0.180470676 | 0.857416575 | -0.099863916 | 0.920807517 |
| PPIH        | -0.278609928 | 0.781203908 | -3.263166683 | 0.001855399 | -0.806270691 | 0.423483281 |
| PPIL1       | -0.011783823 | 0.990625009 | -1.161900003 | 0.250068309 | -0.246582103 | 0.806129538 |
| PPIL2       | 0.377595851  | 0.706648468 | -1.427402701 | 0.158863233 | -0.511780185 | 0.610808736 |
| PPIL3       | 0.753149971  | 0.453388673 | -2.369917393 | 0.021163236 | -1.032152644 | 0.306419146 |
| PPIL4       | 0.723590918  | 0.471253823 | -0.140834415 | 0.888492154 | -0.438445217 | 0.6627433   |
| PPIP5K1     | 1.936090931  | 0.056096276 | 0.981661177  | 0.330372433 | 1.926899965  | 0.059050243 |
| PPIP5K2     | 0.602924528  | 0.54812401  | -0.635415579 | 0.527673951 | -1.878578899 | 0.065489093 |
| PPL         | -0.260132971 | 0.795374533 | -1.794054183 | 0.078053724 | -1.066018424 | 0.290970682 |
| PPM1A       | -4.194198629 | 6.56E-05    | -0.62921046  | 0.531699108 | -1.084345477 | 0.282838551 |
| PPM1B       | 0.522635366  | 0.602553549 | 0.19025464   | 0.849778571 | -1.055347007 | 0.295779532 |
| PPM1D       | -1.595007537 | 0.114329211 | -1.181937482 | 0.242087341 | -2.890922056 | 0.005450193 |
| PPM1F       | -0.603763366 | 0.547568635 | -0.935473563 | 0.353450035 | 0.07689261   | 0.938981891 |
| PPM1G       | -0.650676865 | 0.516966162 | 2.395110371  | 0.019888606 | 3.136492305  | 0.00271942  |
| PPM1H       | 0.018119578  | 0.98558486  | 1.907358775  | 0.061464927 | 1.036675388  | 0.304324304 |
| PPM1J       | 1.303141497  | 0.195957408 | -1.044218826 | 0.300747086 | 0.462548263  | 0.645472967 |
| PPM1K       | 1.135314465  | 0.259354919 | 1.136980237  | 0.26025473  | 1.052997309  | 0.296845673 |
| PPM1L       | -1.67257052  | 0.097996733 | 0.505263895  | 0.615301542 | -0.139937958 | 0.889209001 |
| PPM1M       | -0.618170936 | 0.538074145 | 1.107760183  | 0.2725701   | 1.84030101   | 0.071002858 |
| PPM1N       | 3.490312305  | 0.000759158 | -1.281767425 | 0.205060065 | -1.196558671 | 0.236498842 |
| PPME1       | -0.039684741 | 0.968435196 | 0.859395763  | 0.393685022 | 1.760161604  | 0.083818222 |
| PPOX        | 0.818341126  | 0.415393398 | 1.033254876  | 0.305803742 | 1.021562772  | 0.311362465 |
| PPP1CA      | -2.062568834 | 0.042129251 | 0.179175399  | 0.858428798 | 0.251864326  | 0.802064112 |
| PPP1CB      | -0.034196714 | 0.972798454 | 0.279478761  | 0.78087861  | -0.411089212 | 0.682569475 |
| PPP1CC      | 1.13206922   | 0.260709209 | -0.534676794 | 0.594931492 | -0.601893655 | 0.549663939 |
| PPP1R10     | -1.490407948 | 0.139725925 | 1.113703677  | 0.270032496 | 1.035980158  | 0.304645683 |
| PPP1R11     | -2.7431288   | 0.007386    | -0.673223741 | 0.503497433 | -0.137122477 | 0.891423735 |
| PPP1R12A    | 0.107026565  | 0.91501379  | -0.532733449 | 0.596267576 | -2.072244615 | 0.042839058 |
| PPP1R12B    | -1.2360564   | 0.219757304 | -0.752503444 | 0.454812902 | 0.46568582   | 0.643238954 |
| PPP1R12C    | -0.227122785 | 0.820859966 | 0.292071238  | 0.771281628 | 0.195054375  | 0.846053378 |
| PPP1R13B    | 1.618412389  | 0.109185821 | -1.386964373 | 0.170796974 | 0.140232963  | 0.888976994 |
| PPP1R13L    | 1.961686039  | 0.052989413 | 0.260133817  | 0.795688253 | 0.357603864  | 0.721978427 |
| PPP1R14A    | -0.960971268 | 0.339224089 | 0.133366652  | 0.894368304 | -1.188100613 | 0.239787281 |
| PPP1R14B    | 1.419704654  | 0.159259314 | -0.090539236 | 0.928172849 | -0.51312027  | 0.609877116 |
| PPP1R15A    | -1.776037708 | 0.079215399 | -0.518045311 | 0.606410987 | -1.237034095 | 0.221215237 |
| PPP1R15B    | -0.338414918 | 0.73586411  | -1.183876453 | 0.241324913 | -2.165810548 | 0.034581138 |
| PPP1R16A    | 0.355634042  | 0.722973624 | -0.410835202 | 0.682717884 | -0.698178455 | 0.487942608 |
| PPP1R16B    | -0.105582313 | 0.916156289 | 0.030875458  | 0.975475605 | 0.721784564  | 0.473417451 |
| PPP1R2      | 1.324971606  | 0.188642557 | 0.656737532  | 0.513965268 | 0.554687758  | 0.581307725 |
| PPP1R3B     | -1.063179165 | 0.290636513 | -0.106528933 | 0.915532881 | -1.359478419 | 0.179421437 |
| PPP1R3D     | -0.900308313 | 0.370436209 | -1.546808223 | 0.12738693  | -2.477369471 | 0.01626605  |
| PPP1R3E     | 2.661100964  | 0.009270885 | 0.309693892  | 0.757911449 | 2.592321815  | 0.012126156 |
| PPP1R3F     | 3.107226827  | 0.002549331 | 0.075888923  | 0.939770456 | -0.102128962 | 0.919017602 |
| PPP1R3G     | -0.465532336 | 0.642711047 | -0.107302174 | 0.914922157 | -0.185632859 | 0.853400615 |
| PPP1R7      | -1.247651664 | 0.215499242 | 2.620531434  | 0.011207332 | 3.066039016  | 0.00330731  |
| PPP1R8      | 0.051147679  | 0.959324841 | -0.951251724 | 0.345451456 | -0.207845373 | 0.836100577 |
| PPP1R9A     | 1.389656761  | 0.168171464 | -0.152156016 | 0.879595628 | -0.803227045 | 0.425225457 |
| PPP1R9B     | -1.124510453 | 0.26388287  | -0.218114915 | 0.828110521 | -0.031563907 | 0.974931584 |
| PPP2CA      | 0.561742538  | 0.575732625 | -0.718410077 | 0.47540876  | -0.189016753 | 0.850760194 |
| PPP2CB      | -0.732337093 | 0.465926959 | -1.314732564 | 0.193810851 | -1.015140591 | 0.314386488 |
| PPP2R1A     | -1.31435556  | 0.192173798 | 1.931405575  | 0.058358636 | 2.452384343  | 0.017319651 |
| PPP2R1B     | 0.322074162  | 0.748167466 | 1.210114322  | 0.231178034 | 2.009306167  | 0.049313093 |
| PPP2R2A     | -2.304043527 | 0.023597729 | -2.087990728 | 0.041231265 | -2.118938873 | 0.038525192 |
| PPP2R2B     | -0.181793136 | 0.856167053 | -2.604625412 | 0.011682245 | -1.60095804  | 0.114989389 |
| PPP2R2D     | -0.487642639 | 0.627026933 | -0.624902511 | 0.534502965 | 1.035680733  | 0.304784168 |
| PPP2R3A     | -0.636390838 | 0.526188895 | -1.319126951 | 0.192347087 | -1.455343815 | 0.151133867 |
| PPP2R3B     | 1.992263565  | 0.049470652 | 0.706562313  | 0.482687159 | -0.109686418 | 0.913048549 |
| PPP2R3B-AS1 | -0.045772736 | 0.963596065 | 0.736681825  | 0.464306027 | 1.014362695  | 0.314754119 |
| PPP2R3C     | -1.760222431 | 0.081877073 | 0.495662663  | 0.622018444 | -0.968965139 | 0.336711568 |
| PPP2R4      | -1.061881775 | 0.291221832 | 2.127071421  | 0.037708735 | 2.588354032  | 0.012251364 |
| PPP2R5A     | -2.241500855 | 0.02753272  | -0.857733653 | 0.394594731 | -0.630675199 | 0.530807651 |
| PPP2R5B     | -2.540347051 | 0.012845111 | -1.50125008  | 0.138753507 | -1.746884025 | 0.086116995 |
| PPP2R5C     | -0.913768356 | 0.363358579 | 0.234002492  | 0.81581282  | 0.109073034  | 0.913532831 |
| PPP2R5D     | 0.037197648  | 0.970412449 | 1.02532279   | 0.309497951 | 1.161275752  | 0.250435227 |
| PPP2R5E     | -0.869349729 | 0.387042806 | -1.43322596  | 0.157199366 | -2.128997338 | 0.037647188 |
| PPP3CA      | -0.437658435 | 0.662716164 | 0.137930077  | 0.890776758 | -0.91911412  | 0.361961449 |
| PPP3CB      | 2.199506134  | 0.030487778 | 0.404837883  | 0.687096323 | 0.43759263   | 0.663357652 |
| PPP3CC      | 3.797289959  | 0.000269862 | -1.179216478 | 0.243160205 | -0.261593162 | 0.794590842 |
| PPP3R1      | -2.502974383 | 0.01417963  | -0.405839006 | 0.686364683 | -0.278688198 | 0.781506354 |

|            |              |             |              |             |              |             |
|------------|--------------|-------------|--------------|-------------|--------------|-------------|
| PPP4C      | -1.871647299 | 0.064608508 | 0.251748301  | 0.802131734 | 0.268319256  | 0.789435397 |
| PPP4R1     | -0.983203371 | 0.32822785  | -1.112363325 | 0.270603309 | -2.059270864 | 0.044109726 |
| PPP4R1L    | -1.865895636 | 0.065418369 | 0.15782961   | 0.875143099 | -1.330923028 | 0.188585334 |
| PPP4R2     | 0.356189202  | 0.722559328 | 0.29188064   | 0.771426624 | -1.044460703 | 0.300741224 |
| PPP4R4     | 0.742779419  | 0.459611845 | -0.682575107 | 0.49761157  | -0.066413373 | 0.94728427  |
| PPP5C      | 2.255364106  | 0.026613956 | -2.051632402 | 0.044761794 | -0.005834357 | 0.995365531 |
| PPP6C      | -0.726569335 | 0.469435988 | -1.022806361 | 0.310676224 | -0.230631781 | 0.818437842 |
| PPP6R1     | -1.238788996 | 0.218748337 | 0.615238183  | 0.540820797 | 0.846747719  | 0.400724745 |
| PPP6R2     | 0.727281748  | 0.469001762 | 1.347722367  | 0.1830251   | 1.907694866  | 0.061541731 |
| PPP6R3     | 0.831775716  | 0.407807853 | 0.79448618   | 0.430173967 | 0.576498768  | 0.566578492 |
| PPPDE1     | 1.112458102  | 0.268999116 | -1.72074711  | 0.090665232 | -2.444624301 | 0.017659174 |
| PPPDE2     | -1.707905062 | 0.091212315 | -2.171652262 | 0.034013838 | -1.062933486 | 0.292355264 |
| PPRC1      | 1.916610272  | 0.058563144 | 0.836730134  | 0.406202539 | 1.301098609  | 0.198530408 |
| PPT1       | -1.6067649   | 0.111721694 | -0.093722676 | 0.925654728 | 0.166942694  | 0.868013971 |
| PPT2       | -0.256619722 | 0.798076913 | -0.088244829 | 0.929988199 | 1.061141615  | 0.293161575 |
| PPT2-EGFL8 | -0.10003306  | 0.920547734 | -2.951198061 | 0.004571896 | -3.921615318 | 0.000241494 |
| PPTC7      | -0.589441123 | 0.557089711 | -1.89307729  | 0.063375435 | -3.583852624 | 0.000708203 |
| PPWD1      | 2.087566125  | 0.039755171 | -1.675623747 | 0.099233068 | -1.608566648 | 0.113311325 |
| PQBP1      | -1.110276521 | 0.269932558 | 1.442753467  | 0.154506441 | 1.015744074  | 0.314101484 |
| PQLC1      | -1.787146595 | 0.077388923 | 1.318669209  | 0.19249917  | 0.506811374  | 0.61426867  |
| PQLC2      | -0.298400581 | 0.766107434 | 0.578563801  | 0.565139147 | 0.1072337194 | 0.288148846 |
| PQLC3      | 0.967430986  | 0.336004536 | -1.364978771 | 0.177568188 | -1.207716595 | 0.232210973 |
| PRADC1     | -0.225569126 | 0.822064451 | 0.2797816    | 0.780647401 | 0.243732931  | 0.808324627 |
| PRAF2      | -1.659764766 | 0.100554562 | -2.976007106 | 0.004263674 | -2.574180509 | 0.012708285 |
| PRAM1      | -1.760204135 | 0.081880194 | 0.646021084  | 0.520831432 | 1.45530456   | 0.151144691 |
| PRAME      | 0.709858906  | 0.479685844 | 1.370936964  | 0.175713207 | -0.252827105 | 0.801323705 |
| PRC1       | 1.530990147  | 0.129392202 | 1.03385755   | 0.305524291 | 1.096425815  | 0.277565496 |
| PRCC       | -1.33148154  | 0.186501353 | 0.268016404  | 0.789644227 | 0.703031185  | 0.484936637 |
| PRCD       | -0.786578079 | 0.433661635 | 0.135747111  | 0.892494533 | -1.211181085 | 0.230891204 |
| PRCP       | -2.577133589 | 0.011643025 | 1.231866194  | 0.223004704 | 0.841980378  | 0.403365377 |
| PRDM1      | 0.925085421  | 0.357474848 | -2.245368565 | 0.028598369 | -3.317843752 | 0.001594763 |
| PRDM10     | -0.415342362 | 0.678911656 | -1.033406305 | 0.30573351  | -2.221999555 | 0.030323427 |
| PRDM11     | -0.294421739 | 0.769135489 | 0.096099526  | 0.923775122 | 0.163379396  | 0.870805449 |
| PRDM15     | 1.629329438  | 0.106851214 | 0.355451188  | 0.723550082 | 0.294179202  | 0.769704078 |
| PRDM2      | 0.614209771  | 0.540676126 | -0.897385586 | 0.37324904  | -1.073600379 | 0.287587013 |
| PRDM4      | 1.427654552  | 0.156963285 | -0.205791416 | 0.837679505 | 0.249209285  | 0.804106866 |
| PRDM5      | -2.314320442 | 0.023000964 | -1.001486671 | 0.320780585 | -2.507023564 | 0.015090832 |
| PRDM8      | -0.165954472 | 0.868577001 | -3.820694345 | 0.000328474 | -4.252765294 | 8.05E-05    |
| PRDX1      | 0.686135135  | 0.494448477 | -0.216976165 | 0.828993667 | 0.830993268  | 0.409491767 |
| PRDX2      | -0.636213862 | 0.52630368  | 1.785651369  | 0.079420631 | 2.404143523  | 0.019529304 |
| PRDX3      | -0.431099112 | 0.667460284 | -0.476811035 | 0.635300806 | -1.317534917 | 0.193001998 |
| PRDX4      | 0.935028474  | 0.352356113 | 0.514969262  | 0.60854525  | 0.696503565  | 0.488982492 |
| PRDX5      | -2.709776602 | 0.008105659 | -0.362781119 | 0.718096329 | -0.730757518 | 0.467960974 |
| PRDX6      | -3.608490734 | 0.000513109 | 2.502254847  | 0.015202581 | 2.710362023  | 0.008894651 |
| PREB       | 0.820499343  | 0.414169122 | 0.158368105  | 0.874720706 | 1.320361123  | 0.192063208 |
| PRELID1    | 0.035239572  | 0.971969262 | -1.640735005 | 0.106302848 | -1.676226675 | 0.099245261 |
| PRELID2    | -0.478763816 | 0.633305138 | 0.150036019  | 0.881260373 | -0.456141469 | 0.650044951 |
| PREP       | -0.636702794 | 0.525986593 | 1.747934152  | 0.085804434 | 2.205328149  | 0.031535701 |
| PREPL      | 1.557188001  | 0.123048441 | -1.041576395 | 0.301960536 | -1.343146818 | 0.184620012 |
| PREX1      | -2.69448258  | 0.008456553 | -0.05572737  | 0.955751861 | -1.042802774 | 0.301501833 |
| PRF1       | -0.303618778 | 0.762141692 | -0.828148951 | 0.411004621 | -0.35701675  | 0.722415494 |
| PRG2       | -1.636167746 | 0.105409455 | 1.2109131    | 0.230874078 | 0.367668003  | 0.714500955 |
| PRG4       | 0.151279628  | 0.880104612 | 1.782696985  | 0.07990595  | 0.600284509  | 0.550728101 |
| PRH1-PRR4  | 0.056175634  | 0.955330425 | -1.280896358 | 0.205363786 | -3.108111336 | 0.002951803 |
| PRH2       | 1.424510244  | 0.15786833  | 0.527278322  | 0.600025546 | 1.500438838  | 0.13909456  |
| PRIC285    | -1.253761741 | 0.213279945 | -0.518281871 | 0.606246996 | -2.104652972 | 0.039802899 |
| PRICKLE1   | 0.106526874  | 0.915409059 | 3.085549711  | 0.00312025  | 2.115444438  | 0.038834377 |
| PRICKLE2   | 0.509012876  | 0.612028955 | -0.603388374 | 0.548619273 | 0.753082687  | 0.454541398 |
| PRICKLE3   | -0.772218967 | 0.442072914 | -0.903619043 | 0.369961353 | -0.956123899 | 0.343101881 |
| PRICKLE4   | 0.505358699  | 0.614582058 | -0.325863    | 0.745708986 | -1.072691572 | 0.287991151 |
| PRIM1      | 0.683031199  | 0.496398093 | -0.003820143 | 0.996965175 | 1.310120018  | 0.19548148  |
| PRIM2      | 1.467872261  | 0.14573726  | 2.10047599   | 0.040076013 | 2.367835773  | 0.021355743 |
| PRKAA1     | 1.586450883  | 0.116257346 | -2.553898552 | 0.01332171  | -3.298171565 | 0.001691161 |
| PRKAB1     | -3.908605782 | 0.000183037 | -0.714899518 | 0.477558928 | 0.128487716  | 0.988221421 |
| PRKAB2     | 1.813486711  | 0.073197364 | -0.483675671 | 0.630449901 | -0.238454265 | 0.812395556 |
| PRKACA     | -1.775311308 | 0.079336063 | -1.290036841 | 0.202193382 | -1.037141449 | 0.30410899  |
| PRKACB     | 1.124937697  | 0.263702765 | -0.905298626 | 0.369078664 | -0.957002277 | 0.342662245 |
| PRKAG1     | -2.198794463 | 0.030540158 | -0.561327402 | 0.576751957 | 0.856891703  | 0.395141583 |
| PRKAG2     | -0.522049564 | 0.60295963  | -1.647561568 | 0.104888162 | -2.594935931 | 0.012044303 |
| PRKAR1A    | -2.661829559 | 0.009252377 | -0.474245907 | 0.637117602 | -2.063460536 | 0.043695857 |
| PRKAR1B    | 0.197109145  | 0.844200894 | 1.9921237    | 0.051105168 | 2.823118899  | 0.006565085 |
| PRKAR2A    | -0.515666481 | 0.607392514 | -0.060036795 | 0.95233416  | -0.173382031 | 0.862973719 |

|          |              |             |              |             |              |             |
|----------|--------------|-------------|--------------|-------------|--------------|-------------|
| PRKAR2B  | -5.047529125 | 2.42E-06    | 0.819934794  | 0.415633569 | -0.64250358  | 0.523157118 |
| PRKCA    | 2.528636952  | 0.013250568 | 1.500263774  | 0.13900818  | 1.850967146  | 0.069428494 |
| PRKCB    | -2.327189147 | 0.022272526 | 1.2432012    | 0.218830579 | 0.174943862  | 0.861752084 |
| PRKCD    | -2.543570558 | 0.012735476 | 0.554165988  | 0.581610598 | -0.265510251 | 0.791587318 |
| PRKCDBP  | 0.154597869  | 0.877495661 | 0.226880415  | 0.82132007  | -0.055625852 | 0.955837027 |
| PRKCE    | -0.542299428 | 0.58899566  | 0.131523074  | 0.895819886 | -0.801437409 | 0.462651843 |
| PRKCH    | 1.979315024  | 0.050935621 | -0.075939801 | 0.939730156 | 0.915410388  | 0.363884879 |
| PRKCI    | 0.936807307  | 0.351445362 | -0.997166245 | 0.322854795 | -1.036609495 | 0.304354754 |
| PRKCQ    | 3.358739454  | 0.001162708 | 1.030871535  | 0.306910569 | 2.033499413  | 0.046730966 |
| PRKCSH   | -1.381336281 | 0.170705436 | 0.70139549   | 0.485880632 | 1.047313953  | 0.299435313 |
| PRKCZ    | -1.007317084 | 0.316569826 | -0.777106384 | 0.440276092 | -0.276416743 | 0.783241356 |
| PRKD2    | -1.685374899 | 0.095492301 | -1.575364359 | 0.120649718 | -0.934077855 | 0.354257215 |
| PRKD3    | 1.364284193  | 0.175989355 | -0.554879744 | 0.581125473 | -1.006207941 | 0.318625491 |
| PRKDC    | -2.381725975 | 0.01940707  | 0.683460114  | 0.49705649  | 0.39044372   | 0.697683559 |
| PRKG2    | 0.57113625   | 0.569376554 | 2.901052978  | 0.005259074 | 1.405435709  | 0.165392344 |
| PRKRA    | 1.05614445   | 0.293819893 | -0.125319675 | 0.900706874 | 0.676439673  | 0.501534295 |
| PRKRIP1  | 1.044049392  | 0.299348638 | -2.920577165 | 0.00498086  | -2.882125888 | 0.005584205 |
| PRKRIR   | 0.643632296  | 0.521503307 | -0.106081714 | 0.915886128 | -0.117401465 | 0.906960222 |
| PRKX     | 1.866478785  | 0.065335873 | 0.419742763  | 0.676234987 | 0.150329784  | 0.881042331 |
| PRLR     | 0.036061204  | 0.971315991 | -0.681297153 | 0.498413706 | -1.094625995 | 0.278346728 |
| PRMT1    | 0.40054943   | 0.689731688 | -1.385317754 | 0.171297131 | -0.807108562 | 0.42300444  |
| PRMT10   | 1.547367853  | 0.1253968   | 0.235183735  | 0.8149003   | 0.847799595  | 0.40014355  |
| PRMT2    | 2.439327631  | 0.016740919 | 0.083656647  | 0.933619509 | 0.909520557  | 0.366957089 |
| PRMT3    | 2.400787018  | 0.018485721 | -1.265194064 | 0.210896487 | -0.652235094 | 0.516906679 |
| PRMT5    | -0.693667383 | 0.489734759 | 1.353234431  | 0.18126835  | 0.929455406  | 0.356625699 |
| PRMT6    | 0.740367597  | 0.461066077 | -1.539223767 | 0.129225923 | -1.475935208 | 0.145538888 |
| PRMT7    | 1.894396024  | 0.0614874   | 1.579045474  | 0.119802446 | 2.20004719   | 0.031928513 |
| PRNP     | -0.146523347 | 0.883846518 | 0.940180481  | 0.351051428 | -0.43140266  | 0.667824936 |
| PROC     | -1.144910143 | 0.25537952  | 0.042379152  | 0.966343022 | -0.028568807 | 0.977309634 |
| PROCA1   | 1.470875504  | 0.144924709 | 0.986196016  | 0.328161778 | 1.472634608  | 0.146424259 |
| PROCR    | -0.687984592 | 0.493288797 | -1.428649376 | 0.158505884 | -1.670993723 | 0.100279548 |
| PROK2    | 0.735828483  | 0.463810063 | -0.465546992 | 0.643295394 | -0.96527054  | 0.338542043 |
| PROM2    | -0.749321238 | 0.455680572 | 0.88455124   | 0.380076453 | 0.859869045  | 0.393512088 |
| PRORSIDP | 1.666722581  | 0.099158168 | -2.176335882 | 0.033644726 | -2.283449533 | 0.026202779 |
| PROS1    | -2.452883498 | 0.016163115 | 1.514984895  | 0.135245256 | 0.494056504  | 0.623190586 |
| PROSC    | -0.648100496 | 0.518623089 | 0.41783105   | 0.677624273 | 0.209430633  | 0.834868911 |
| PROSER1  | 0.347497486  | 0.729055068 | -0.720922846 | 0.473873077 | -0.445248504 | 0.657849399 |
| PROX2    | 3.148075769  | 0.002250266 | 1.023361122  | 0.310416206 | 1.304310421  | 0.197440858 |
| PROZ     | 1.875378036  | 0.064087715 | 0.419341905  | 0.676526206 | 0.295550742  | 0.768661719 |
| PRPF18   | 0.344089012  | 0.731607828 | 0.583057713  | 0.562130492 | -0.056169824 | 0.955405612 |
| PRPF19   | 0.138993105  | 0.88977614  | 1.715018826  | 0.091717871 | 1.960034289  | 0.054953738 |
| PRPF3    | 0.817075816  | 0.416112171 | 1.406560753  | 0.164930479 | 2.976007613  | 0.004299358 |
| PRPF31   | -1.068682224 | 0.288162757 | 1.93074909   | 0.058441628 | 2.53618904   | 0.01401042  |
| PRPF38A  | -0.222607739 | 0.824361465 | 1.486525151  | 0.142594147 | 1.732569861  | 0.088653565 |
| PRPF38B  | 1.990369935  | 0.049682623 | -1.773910978 | 0.081363867 | -3.077754338 | 0.003220882 |
| PRPF39   | 1.784079543  | 0.077889673 | -0.651874569 | 0.51707503  | -1.020439536 | 0.311889939 |
| PRPF4    | -0.725012269 | 0.470385829 | 1.851775587  | 0.069186057 | 2.591487807  | 0.012152377 |
| PRPF40A  | 1.234025418  | 0.220509409 | 0.257516645  | 0.797697792 | -0.491005803 | 0.625333036 |
| PRPF40B  | 0.409500091  | 0.683176999 | -0.605532793 | 0.547203797 | 1.299288062  | 0.199146591 |
| PRPF4B   | 2.232914207  | 0.028115641 | -0.694275987 | 0.490300155 | -1.465340993 | 0.148396814 |
| PRPF6    | -0.872011317 | 0.385597195 | 3.213589291  | 0.002148654 | 3.724653639  | 0.000454895 |
| PRPF8    | -0.276139649 | 0.783094292 | 0.975500421  | 0.333391506 | 1.162331122  | 0.250009998 |
| PRPH2    | 0.21450799   | 0.83065184  | -0.039109002 | 0.96893873  | 0.307230915  | 0.759802466 |
| PRPS1    | 1.739379749  | 0.085497126 | -0.379116175 | 0.705995672 | 0.641542519  | 0.523776551 |
| PRPS2    | 0.709067626  | 0.480174262 | 0.890515719  | 0.376893819 | 0.692148549  | 0.491692106 |
| PRPSAP1  | 0.189892775  | 0.849834555 | 0.159905506  | 0.873514979 | 1.02748643   | 0.308590702 |
| PRPSAP2  | 1.160803308  | 0.248890284 | 3.413518939  | 0.001180027 | 4.392129147  | 5.01E-05    |
| PRR11    | -1.629884505 | 0.106733596 | 0.219865105  | 0.826753614 | -0.377727816 | 0.707054719 |
| PRR12    | 0.884275346  | 0.37897958  | -1.385022062 | 0.171387066 | -0.695493666 | 0.489610096 |
| PRR13    | -3.345204997 | 0.001214103 | -0.458609624 | 0.648240401 | -0.570653689 | 0.570507671 |
| PRR14    | -1.608689001 | 0.111299552 | -1.450209954 | 0.152424058 | -1.266917195 | 0.210406712 |
| PRR14L   | -1.435218789 | 0.15480242  | 0.696476257  | 0.488931945 | 0.767670536  | 0.445894297 |
| PRR22    | -0.641034007 | 0.523182015 | -1.111008084 | 0.271181325 | -1.125071755 | 0.265337579 |
| PRR24    | -1.624621577 | 0.107853006 | -0.957938217 | 0.342097803 | -1.790973444 | 0.078679775 |
| PRR3     | -0.1469053   | 0.883545925 | 0.229238958  | 0.819495276 | 1.081221137  | 0.284213596 |
| PRR5     | 0.13058676   | 0.896403045 | -2.219560867 | 0.030400859 | -0.554780149 | 0.581244947 |
| PRR5L    | -1.487353459 | 0.140529145 | -1.633684251 | 0.107780251 | -1.184138308 | 0.241339135 |
| PRR7     | -0.435083126 | 0.664577164 | -3.186033366 | 0.002329973 | -2.819192024 | 0.006635703 |
| PRRC1    | 0.797904139  | 0.427093956 | -0.508781253 | 0.612849057 | -0.800529986 | 0.426772832 |
| PRRC2A   | -1.139224599 | 0.257729754 | -0.611501951 | 0.5432735   | -0.332017276 | 0.741110519 |
| PRRC2B   | 0.213943899  | 0.831090337 | 0.541811505  | 0.590038326 | 1.02597389   | 0.309296843 |
| PRRC2C   | 0.003264601  | 0.997402688 | 0.183432804  | 0.855102662 | -0.048588057 | 0.961419739 |

|          |              |             |              |             |              |             |
|----------|--------------|-------------|--------------|-------------|--------------|-------------|
| PRRG4    | -5.150402342 | 1.60E-06    | 0.055655769  | 0.955808653 | -1.296280829 | 0.20017321  |
| PRRT1    | 0.033086284  | 0.973681407 | -2.793724028 | 0.00706299  | -2.181569218 | 0.03333705  |
| PRRT2    | 0.6584776    | 0.511966372 | -1.948722767 | 0.056205422 | -0.985450618 | 0.3286237   |
| PRRT3    | 0.37349342   | 0.709687845 | -0.199544966 | 0.842539288 | 0.019950821  | 0.984153222 |
| PRRT4    | -0.175364318 | 0.861199997 | 1.442209826  | 0.154659128 | 0.245620099  | 0.80687052  |
| PRSS16   | -0.353438285 | 0.724613048 | 0.173170644  | 0.86312444  | -0.033532009 | 0.973369074 |
| PRSS21   | 0.731118142  | 0.466667315 | 0.542826602  | 0.589343695 | 1.144929135  | 0.257087904 |
| PRSS22   | 1.55038132   | 0.12467242  | -1.997704356 | 0.050479124 | -0.286900352 | 0.775243052 |
| PRSS23   | -0.200321611 | 0.841695581 | -2.349890359 | 0.022228077 | -1.510274048 | 0.136572265 |
| PRSS27   | -0.258523439 | 0.796612272 | -1.129921996 | 0.263192757 | -1.15653128  | 0.252353275 |
| PRSS30P  | 1.351853161  | 0.179918883 | -3.283205868 | 0.00174793  | -0.913094711 | 0.36509079  |
| PRSS33   | 2.908506277  | 0.004606046 | 0.007304902  | 0.994196826 | 0.135107181  | 0.893009556 |
| PRSS35   | 1.565001957  | 0.121204911 | -0.811960895 | 0.420157216 | -1.041141786 | 0.302265163 |
| PRSS36   | -2.124277442 | 0.036478259 | 1.344954372  | 0.183912157 | 0.901781604  | 0.371018985 |
| PRSS41   | 0.672605425  | 0.502977052 | 0.25612303   | 0.798768412 | -0.658536234 | 0.512880815 |
| PRSS53   | 0.356957858  | 0.721985844 | 0.03882578   | 0.969163555 | 0.524690587  | 0.6018606   |
| PRSS57   | -0.306385457 | 0.76004163  | -1.283204532 | 0.204559711 | -1.127933561 | 0.264137235 |
| PRSS8    | -1.277710188 | 0.204743177 | -0.235601805 | 0.814577399 | -0.248919754 | 0.804329711 |
| PRTFDC1  | -1.024817236 | 0.308284368 | -1.029291366 | 0.3076459   | -0.488416023 | 0.627154344 |
| PRTN3    | -2.717259954 | 0.007938844 | 1.491566768  | 0.141269843 | 0.645193907  | 0.521425176 |
| PRUNE    | -2.768078157 | 0.006886313 | 0.401898239  | 0.689246409 | 0.021097106  | 0.983242871 |
| PRUNE2   | -1.636754118 | 0.105286561 | 0.137585456  | 0.891047906 | 0.099701309  | 0.920936031 |
| PRX      | 2.843124857  | 0.005563737 | 2.871502642  | 0.005707658 | 3.28772431   | 0.001744567 |
| PSAP     | -2.344771436 | 0.021310286 | 2.211907122  | 0.030954335 | 2.05351553   | 0.044683792 |
| PSAT1    | 0.156363624  | 0.876107895 | 1.137275503  | 0.260132334 | 1.71845597   | 0.09121487  |
| PSD      | -0.09504876  | 0.924494206 | -1.018077905 | 0.312898446 | -0.185008471 | 0.853888005 |
| PSD3     | -0.213429659 | 0.83149013  | 2.210726827  | 0.031040473 | -0.037659771 | 0.97009232  |
| PSD4     | -1.285402182 | 0.202055606 | 0.583369365  | 0.561922137 | 1.353370613  | 0.181352403 |
| PSEN1    | -2.986907575 | 0.003658636 | -0.280750669 | 0.779907678 | -0.349304065 | 0.728165654 |
| PSEN2    | -0.055395276 | 0.955950301 | 1.388130382  | 0.17044348  | 1.17100619   | 0.246534256 |
| PSENEEN  | -2.567964801 | 0.011932742 | -0.915700636 | 0.363641969 | -1.192417038 | 0.238104969 |
| PSIMCT-1 | 0.515977003  | 0.607176522 | -0.586150284 | 0.560064653 | -0.964469239 | 0.338939909 |
| PSIP1    | 1.844998938  | 0.068432722 | 1.142482171  | 0.257980733 | 0.885116814  | 0.379862573 |
| PSKH1    | 0.469779939  | 0.639685086 | 1.475406619  | 0.145549257 | 1.621377772  | 0.110530662 |
| PSMA1    | -1.408685724 | 0.162484349 | -1.358208944 | 0.179693975 | 0.928283459  | 0.357227815 |
| PSMA2    | 0.416322798  | 0.678196876 | -0.481029257 | 0.632318073 | 0.267647193  | 0.789950101 |
| PSMA3    | 1.06928008   | 0.287894879 | -0.596703364 | 0.553043749 | 0.09895111   | 0.921528964 |
| PSMA4    | 0.331972446  | 0.740706784 | -0.070353751 | 0.944155809 | -0.126324476 | 0.899925647 |
| PSMA5    | 0.325022764  | 0.745942455 | 0.493589484  | 0.623473092 | 1.228543913  | 0.224359391 |
| PSMA6    | 0.522716308  | 0.602497449 | -0.301658987 | 0.763998535 | -0.293850513 | 0.769953942 |
| PSMA7    | -0.122289386 | 0.902951266 | -0.352219866 | 0.725958914 | -0.02768969  | 0.978007676 |
| PSMB1    | -0.79084579  | 0.431179956 | 0.820138456  | 0.415518418 | 1.857388056  | 0.068495012 |
| PSMB10   | -2.025154986 | 0.045910166 | 0.641873024  | 0.523502106 | 0.429970185  | 0.668860481 |
| PSMB2    | -2.163244979 | 0.033258661 | -1.658866939 | 0.102579083 | -0.395312625 | 0.694107755 |
| PSMB3    | -1.630475789 | 0.106608419 | 0.935660126  | 0.353354762 | 0.941420515  | 0.350151597 |
| PSMB4    | -1.459035907 | 0.148148588 | -0.065843878 | 0.947730139 | 0.445696522  | 0.657527645 |
| PSMB5    | 1.074684261  | 0.285481209 | -0.489630129 | 0.626255364 | 0.646371263  | 0.520668188 |
| PSMB6    | -0.659222304 | 0.511490408 | -0.355938234 | 0.72318725  | 0.691725025  | 0.491956056 |
| PSMB7    | -1.234260427 | 0.220422285 | -1.654464246 | 0.103473335 | -0.50084443  | 0.618435309 |
| PSMB8    | -1.405271833 | 0.163493636 | 1.091712005  | 0.279505423 | 0.316963683  | 0.752444874 |
| PSMB9    | -2.51083432  | 0.013889048 | -0.807214321 | 0.422864018 | -2.013862579 | 0.048817599 |
| PSMC1    | -0.678272827 | 0.499394957 | 3.018951645  | 0.003775414 | 3.674344301  | 0.000533374 |
| PSMC2    | 1.624037558  | 0.107977806 | -0.32030371  | 0.749897258 | 0.374890402  | 0.709152088 |
| PSMC3    | -0.108606368 | 0.913764266 | 2.465043402  | 0.016703165 | 0.3509814732 | 0.000890669 |
| PSMC3IP  | -1.618447907 | 0.10917816  | -0.169497065 | 0.865999592 | 1.034409485  | 0.3053726   |
| PSMC4    | -1.600402804 | 0.113126675 | 0.065727044  | 0.947822751 | 0.722768056  | 0.472817638 |
| PSMC5    | -1.021117222 | 0.310023866 | 1.443459082  | 0.154308438 | 2.706424839  | 0.00898827  |
| PSMC6    | 0.421828574  | 0.674188412 | 0.077761395  | 0.93828737  | 0.128004612  | 0.898601975 |
| PSMD1    | -0.619825117 | 0.536989454 | 2.369697193  | 0.021174692 | 2.607541539  | 0.011656608 |
| PSMD10   | 0.802124534  | 0.424661819 | -1.069821983 | 0.289162387 | -1.198653408 | 0.235689504 |
| PSMD11   | -0.212426077 | 0.832270484 | 1.295478037  | 0.200323549 | 1.665985973  | 0.101277571 |
| PSMD12   | 1.383301601  | 0.170104296 | 1.160816984  | 0.250504989 | 2.280848419  | 0.026366586 |
| PSMD13   | -0.85442529  | 0.395210981 | 3.220714407  | 0.002103978 | 3.868976339  | 0.000286465 |
| PSMD14   | 0.815697136  | 0.416896195 | 0.090839198  | 0.927935545 | 0.703708334  | 0.484518005 |
| PSMD2    | -0.667388368 | 0.506286675 | 2.751770493  | 0.00791166  | 2.809991209  | 0.006803919 |
| PSMD3    | -0.348622111 | 0.728213454 | -1.174466315 | 0.245041356 | -1.106044284 | 0.273416493 |
| PSMD4    | -0.883020827 | 0.379653231 | 2.5447251    | 0.01363957  | 3.290762115  | 0.001728876 |
| PSMD5    | 1.418392782  | 0.159640671 | -1.214274398 | 0.229598209 | -0.767482252 | 0.446005288 |
| PSMD6    | -1.927753181 | 0.057141112 | -0.085143446 | 0.932442625 | 0.80316672   | 0.42526003  |
| PSMD7    | -1.308225817 | 0.194235139 | 1.562657998  | 0.123611334 | 2.896484358  | 0.005366995 |
| PSMD8    | -1.178003017 | 0.24200069  | -1.713915344 | 0.091921802 | -1.218246141 | 0.228216807 |
| PSMD9    | -0.746739778 | 0.457229584 | 1.702993999  | 0.093960367 | 1.240766916  | 0.219843177 |



|         |              |             |              |             |              |             |
|---------|--------------|-------------|--------------|-------------|--------------|-------------|
| PSME1   | -2.341638812 | 0.021478983 | 1.799363138  | 0.077200276 | 1.380060559  | 0.173029934 |
| PSME2   | -1.957682242 | 0.053465545 | -0.001720841 | 0.998632915 | -0.314223348 | 0.754514159 |
| PSME3   | -1.71036149  | 0.09075531  | 0.207231253  | 0.836560195 | 0.205084655  | 0.838246499 |
| PSME4   | -0.912380234 | 0.364084483 | 0.87304417   | 0.386264332 | 1.402283023  | 0.166326847 |
| PSMF1   | -2.516992903 | 0.013665114 | 0.270877679  | 0.787453513 | -0.101509046 | 0.91950744  |
| PSMG1   | 0.833569344  | 0.406801513 | -0.997969329 | 0.322468562 | 0.676123837  | 0.501733271 |
| PSMG2   | -2.243295958 | 0.027412204 | -0.590154851 | 0.557395223 | -0.650317698 | 0.518133505 |
| PSMG3   | 0.64546497   | 0.520320947 | 0.564011633  | 0.57493592  | 0.752888275  | 0.45465729  |
| PSMG4   | 1.389271548  | 0.168288141 | -0.39094378  | 0.697281197 | -0.48482757  | 0.629681846 |
| PSPC1   | -0.005540223 | 0.995592221 | 0.595251432  | 0.554007079 | -0.216687215 | 0.829236267 |
| PSPH    | -0.228124878 | 0.820083314 | 1.207560725  | 0.232151702 | 1.631542323  | 0.108364029 |
| PSRC1   | -2.479435442 | 0.015082783 | 0.764081898  | 0.447937384 | 1.799602938  | 0.077288738 |
| PSTK    | -1.067368211 | 0.288752121 | -0.044563515 | 0.964609368 | -0.787962148 | 0.43402766  |
| PSTPIP1 | -0.736066687 | 0.463665834 | 0.396299431  | 0.693348555 | 0.914696841  | 0.364256193 |
| PSTPIP2 | -0.139746723 | 0.889182422 | -0.643615182 | 0.522379563 | -1.419976901 | 0.161134555 |
| PTAFR   | -3.729314941 | 0.000340902 | -0.041061976 | 0.967388498 | -0.315103937 | 0.75384901  |
| PTAR1   | 0.907927491  | 0.366419219 | -1.498129762 | 0.139560465 | -2.350666106 | 0.022271502 |
| PTBP1   | -0.271168254 | 0.786902598 | -1.258282381 | 0.213366592 | -1.210730416 | 0.231062572 |
| PTBP2   | 0.813687309  | 0.418040724 | -0.914931992 | 0.36404194  | -1.498192636 | 0.139675746 |
| PTCD1   | 0.695342429  | 0.488689861 | -2.135207255 | 0.03700937  | -1.194734454 | 0.237205303 |
| PTCD2   | 0.845682917  | 0.400044566 | -0.016034467 | 0.987262309 | -0.19724644  | 0.844345871 |
| PTCD3   | 3.084157279  | 0.002734169 | 0.32242116   | 0.748301108 | 0.931063095  | 0.35580078  |
| PTCH1   | 2.987994694  | 0.003646868 | -1.710283352 | 0.092595661 | -1.078329935 | 0.285490169 |
| PTCH2   | 1.549889884  | 0.124790325 | -1.446164781 | 0.153551023 | -0.957077852 | 0.342624437 |
| PTCHD2  | 0.746301963  | 0.457492594 | 0.551181541  | 0.58364117  | 0.088790045  | 0.929564217 |
| PTCRA   | -2.463890645 | 0.015707134 | 2.755968413  | 0.007822702 | 1.410935853  | 0.163717141 |
| PTDSS1  | 1.513498076  | 0.133769826 | 1.812414066  | 0.07513538  | 1.814633418  | 0.074915031 |
| PTDSS2  | -0.167317747 | 0.867507502 | 1.934406472  | 0.057980544 | 2.085577129  | 0.041566476 |
| PTEN    | -1.116787869 | 0.267153206 | -0.097401175 | 0.922745966 | -0.893291176 | 0.375508132 |
| PTENP1  | -0.967066644 | 0.336185592 | -2.953388546 | 0.00454387  | -2.374683268 | 0.021000018 |
| PTER    | 1.004812294  | 0.317767771 | -0.857867342 | 0.394521512 | -1.651885701 | 0.104131392 |
| PTGDR   | 3.807822823  | 0.000260205 | -3.176163952 | 0.002398341 | -3.129915045 | 0.002771694 |
| PTGDS   | 0.583690971  | 0.560935221 | -1.087205913 | 0.28147471  | -0.282056254 | 0.778935795 |
| PTGER2  | 2.723125157  | 0.007810293 | -1.518146791 | 0.134447662 | -2.529212466 | 0.014262285 |
| PTGER4  | -0.592175019 | 0.555265965 | -1.722453992 | 0.090353508 | -3.556634514 | 0.000770696 |
| PTGES   | -5.755445635 | 1.26E-07    | 2.444010036  | 0.017609199 | 3.921851268  | 0.000241308 |
| PTGES2  | -0.072716983 | 0.942197891 | -0.112959837 | 0.910455193 | 0.02224424   | 0.982331867 |
| PTGES3  | -0.255237522 | 0.799140774 | 2.005866228  | 0.049575398 | 1.929077562  | 0.058773244 |
| PTGFRN  | 1.397456794  | 0.165822174 | 1.168934533  | 0.247245222 | 2.075636177  | 0.042512168 |
| PTGIR   | 1.506245632  | 0.135618684 | 0.58694407   | 0.559535013 | 0.789730091  | 0.433002707 |
| PTGR2   | 1.026596436  | 0.30745025  | 1.087920237  | 0.281161888 | 0.756382866  | 0.452576731 |
| PTGS1   | -4.267472481 | 5.01E-05    | 2.330601951  | 0.023298578 | 1.09725284   | 0.277207031 |
| PTGS2   | -1.307924065 | 0.194337038 | -1.352906074 | 0.181372639 | -2.605158517 | 0.011729017 |
| PTK2    | -1.09185715  | 0.277903835 | 1.997534354  | 0.050498098 | 2.588689652  | 0.012240727 |
| PTK2B   | -1.465133263 | 0.146481407 | 0.499580701  | 0.619273487 | 0.557605426  | 0.579326277 |
| PTK6    | -0.402970178 | 0.687956578 | -0.267051391 | 0.790383468 | 1.040270202  | 0.30266624  |
| PTK7    | -1.043289992 | 0.299698106 | -0.027768487 | 0.977942792 | -0.263402979 | 0.793202729 |
| PTMA    | 0.927389008  | 0.356284731 | 0.744725879  | 0.459465434 | 1.353268935  | 0.181384682 |
| PTMS    | -2.139323508 | 0.035204418 | -1.367156257 | 0.176888537 | -2.023744592 | 0.047757693 |
| PTOV1   | -0.738983973 | 0.461901526 | -0.862092845 | 0.392211626 | -0.384019214 | 0.702412381 |
| PTP4A1  | -3.018485876 | 0.003330731 | 0.199653099  | 0.842455106 | -1.474163952 | 0.146013672 |
| PTP4A2  | -2.336177161 | 0.021775933 | 1.247067101  | 0.217420209 | 1.364523792  | 0.177838226 |
| PTP4A3  | -0.994822707 | 0.322575432 | 0.244589458  | 0.807643598 | 0.456075777  | 0.6500919   |
| PTPDC1  | 2.889256019  | 0.004870933 | -0.558918614 | 0.578383999 | -1.655461797 | 0.103401471 |
| PTPLA   | 0.317120442  | 0.751910335 | 0.675047106  | 0.502346831 | 0.396921435  | 0.692927748 |
| PTPLAD1 | 0.374873071  | 0.708665173 | -0.487672351 | 0.627633134 | 0.280664332  | 0.779997835 |
| PTPLAD2 | -1.588670832 | 0.115754628 | -2.601779698 | 0.011769118 | -2.979870794 | 0.004252905 |
| PTPLB   | 0.462191399  | 0.645095354 | -1.536091278 | 0.129991601 | -2.539606562 | 0.01388852  |
| PTPMT1  | 1.582202481  | 0.11722428  | -2.132059397 | 0.037278607 | -1.02659323  | 0.309007567 |
| PTPN1   | -0.258061414 | 0.796967668 | -0.039688132 | 0.968479015 | -0.241883757 | 0.809750117 |
| PTPN11  | 1.012404733  | 0.31414589  | 2.087733568  | 0.041255361 | 1.109553507  | 0.271913657 |
| PTPN12  | -1.164307521 | 0.247475421 | -0.17850023  | 0.858956519 | -1.380371026 | 0.172934878 |
| PTPN13  | 0.764665086  | 0.446535688 | 0.091849628  | 0.92713623  | -0.864539399 | 0.390964443 |
| PTPN14  | -0.601134574 | 0.549310041 | 0.570662612  | 0.570448144 | 0.954857601  | 0.343736325 |
| PTPN18  | -1.870526066 | 0.064765719 | 0.485196184  | 0.629377627 | 0.850045365  | 0.398904432 |
| PTPN2   | 1.588630284  | 0.115763795 | -0.84323708  | 0.402584228 | -0.729390062 | 0.468790211 |
| PTPN22  | 0.075286866  | 0.940158946 | -1.752217121 | 0.085058742 | -2.276596142 | 0.026636335 |
| PTPN23  | -0.082640807 | 0.934326584 | -0.526245209 | 0.600738482 | 0.217664743  | 0.82847818  |
| PTPN4   | 1.450423517  | 0.150528524 | -0.439421128 | 0.662000713 | -0.331008206 | 0.741868512 |
| PTPN6   | -1.699326072 | 0.092823174 | 0.154878719  | 0.877458405 | 0.121551013  | 0.903687903 |
| PTPN7   | 1.00418243   | 0.318069485 | -0.250900311 | 0.802784112 | 1.787960433  | 0.07917036  |
| PTPN9   | -0.855296829 | 0.394731091 | 0.193315102  | 0.847392305 | 0.001537116  | 0.998778999 |

|           |              |             |              |             |              |             |
|-----------|--------------|-------------|--------------|-------------|--------------|-------------|
| PTPRA     | 0.483562806  | 0.629908403 | -0.457688304 | 0.64889833  | 0.409118006  | 0.684007037 |
| PTPRB     | 0.92530283   | 0.357362418 | -0.263786174 | 0.792886195 | -0.755165778 | 0.453300716 |
| PTPRC     | 0.269665029  | 0.788055161 | -0.88818846  | 0.378133628 | -2.066081251 | 0.04343869  |
| PTPRCAP   | 1.072074446  | 0.286645088 | -1.762876092 | 0.08322627  | -0.760434827 | 0.450171262 |
| PTPRE     | -1.333813128 | 0.185738921 | -0.15651545  | 0.876174071 | -0.917184207 | 0.362962878 |
| PTPRF     | -2.784496948 | 0.00657454  | 1.333554068  | 0.187600065 | 0.279208851  | 0.781108822 |
| PTPRJ     | -0.503025424 | 0.616214764 | -0.224936239 | 0.822825017 | -0.771068172 | 0.443894211 |
| PTPRK     | 1.077953672  | 0.284027767 | 0.752570226  | 0.454773071 | 0.834296815  | 0.407643766 |
| PTPRM     | 2.928242367  | 0.004348303 | -0.637425976 | 0.526373268 | 0.001260015  | 0.998999113 |
| PTPRN     | -2.423594695 | 0.017434592 | -0.439324293 | 0.662070457 | -0.564205881 | 0.574857423 |
| PTPRN2    | -2.659150901 | 0.009320588 | -0.737280073 | 0.463945026 | -2.018355579 | 0.048333209 |
| PTPRO     | 5.233627802  | 1.13E-06    | -0.326325659 | 0.745360773 | -0.379750601 | 0.705560903 |
| PTPRS     | 3.897884976  | 0.000190066 | -0.588272007 | 0.558649527 | -0.29652632  | 0.767920549 |
| PTPRU     | -0.139489012 | 0.889385446 | 0.856115567  | 0.395481597 | 0.340023126  | 0.735105879 |
| PTPRVP    | 0.176560575  | 0.86026304  | 0.157118365  | 0.875701051 | 0.218404522  | 0.827904579 |
| PTRF      | -2.875930063 | 0.005062436 | 1.856881817  | 0.068444174 | 1.801375609  | 0.077005553 |
| PTRH1     | -0.472427436 | 0.637802104 | -2.246333221 | 0.028532864 | -1.448108067 | 0.153139411 |
| PTRH2     | 2.400690834  | 0.018490271 | 0.537359842  | 0.593089159 | 0.710319771  | 0.48044122  |
| PTRHD1    | -0.802437419 | 0.424481837 | -1.472853495 | 0.14623458  | -0.696064734 | 0.48925515  |
| PTS       | 0.11820395   | 0.906177957 | -1.661917001 | 0.101963277 | -0.087940447 | 0.930236415 |
| PTTG1     | 0.993130672  | 0.323394509 | 1.044389905  | 0.300668639 | 2.808404121  | 0.00683333  |
| PTTG1IP   | -1.154436218 | 0.25147577  | 0.557884212  | 0.579085529 | -0.233155285 | 0.816487394 |
| PTX3      | 1.12547679   | 0.263475635 | 2.216257896  | 0.030638632 | 0.917922389  | 0.362579627 |
| PTX4      | 0.5570287    | 0.578934946 | -1.18093023  | 0.242484091 | -0.72238529  | 0.473051029 |
| PUF60     | -0.659359904 | 0.511402489 | 1.518698675  | 0.134308831 | 2.21917881   | 0.030525605 |
| PUM1      | 0.85713412   | 0.393720609 | 0.868434031  | 0.388761026 | -0.079760586 | 0.936710829 |
| PUM2      | 0.859393901  | 0.392479952 | -0.866801976 | 0.389647302 | -1.812490362 | 0.075249693 |
| PURA      | 1.816881014  | 0.072671223 | 0.086628363  | 0.931267382 | -0.690120679 | 0.49295663  |
| PURB      | 0.701581042  | 0.484808972 | -3.343376578 | 0.001459449 | -3.853968258 | 0.000300697 |
| PUS1      | 0.319506373  | 0.750106856 | 0.746396416  | 0.45846382  | 1.614268127  | 0.112066903 |
| PUS10     | 0.118559636  | 0.905896971 | -1.94321966  | 0.0568822   | -2.122080561 | 0.038249054 |
| PUS3      | 0.285039212  | 0.776290081 | 0.933142472  | 0.354641868 | 0.827357988  | 0.411531241 |
| PUS7      | -0.134014914 | 0.893699642 | -0.646111061 | 0.520773582 | -0.363809132 | 0.717364748 |
| PUS7L     | 0.534614866  | 0.594276924 | -1.003856415 | 0.319646689 | -2.258067476 | 0.027840496 |
| PUSL1     | 1.239686214  | 0.218417793 | 0.234388841  | 0.815514334 | -0.001761391 | 0.998600848 |
| PVALB     | -3.493941627 | 0.000750173 | 1.050115582  | 0.298051231 | 0.806087519  | 0.423588008 |
| PVR       | 0.589217065  | 0.557239309 | 0.238820609  | 0.812092409 | 1.248248806  | 0.217111986 |
| PVRIG     | -0.468439724 | 0.64063919  | -1.395459069 | 0.168234541 | -0.601860741 | 0.549685695 |
| PVRL1     | -2.311500856 | 0.023163352 | 0.377394117  | 0.707267809 | 0.339185758  | 0.735733161 |
| PVRL2     | -1.793067171 | 0.076429831 | 1.11161567   | 0.27092208  | 0.400725868  | 0.690140374 |
| PVRL3     | 0.002084263  | 0.998341761 | 0.369315358  | 0.713246987 | -0.093357598 | 0.925951286 |
| PVT1      | 3.176100526  | 0.002064364 | 0.935346459  | 0.353514953 | 0.959647567  | 0.34134049  |
| PWP1      | 1.796539517  | 0.075871937 | 0.681403583  | 0.498346876 | 2.347809197  | 0.022427235 |
| PWP2      | 1.147922312  | 0.254140538 | 1.191261137  | 0.238437049 | 2.090856734  | 0.041071698 |
| PWWP2A    | 0.089246819  | 0.929090445 | -1.759811091 | 0.083749808 | -2.947093625 | 0.004662328 |
| PWWP2B    | 1.189421198  | 0.237503009 | -0.636638561 | 0.526882507 | -0.546974524 | 0.586560252 |
| PXDN      | 0.149210899  | 0.881731812 | -0.809414108 | 0.421608257 | -0.759950935 | 0.450458136 |
| PXK       | -0.756357968 | 0.451473455 | 0.484773822  | 0.629675399 | -0.217156675 | 0.828872173 |
| PXMP2     | 1.058609663  | 0.292701627 | 0.13506526   | 0.893031187 | -0.683919701 | 0.496834465 |
| PXMP4     | -0.187897098 | 0.851393926 | 0.616248384  | 0.540158613 | 2.16680771   | 0.034501225 |
| PXN       | -2.188643093 | 0.031295911 | -0.410697746 | 0.682818115 | -0.493294913 | 0.623725132 |
| PYCARD    | -1.071009307 | 0.287121035 | -0.467248691 | 0.642084872 | -0.789075904 | 0.4333818   |
| PYCR1     | -0.614536549 | 0.540461233 | 1.440586953  | 0.155115627 | 1.139487907  | 0.259330049 |
| PYCR2     | 0.361666572  | 0.718476213 | 0.87327054   | 0.386141997 | 1.403434875  | 0.16598495  |
| PYCR1     | 1.955307854  | 0.053749621 | -0.94250821  | 0.349869157 | -0.059129853 | 0.9530583   |
| PYGB      | -0.737701622 | 0.462676592 | 0.965496885  | 0.338332526 | 1.215612083  | 0.229211239 |
| PYGL      | -1.491075028 | 0.139550986 | 0.816686033  | 0.417473039 | 0.476394355  | 0.635639238 |
| PYGM      | 0.220273202  | 0.826173341 | -0.857742165 | 0.394590069 | -0.944371147 | 0.349019813 |
| PYGO2     | 0.219064292  | 0.827111968 | 0.272845471  | 0.785947887 | 1.328997168  | 0.18921591  |
| PYHIN1    | 0.902853432  | 0.369091285 | -3.269285012 | 0.001821943 | -1.991700251 | 0.051268596 |
| PYROXD1   | -0.614881054 | 0.540234729 | -1.217026199 | 0.228557529 | -1.067068251 | 0.290500533 |
| PYROXD2   | 1.569097357  | 0.120247508 | -1.846845508 | 0.069908767 | -0.783035249 | 0.436891585 |
| PZP       | -1.141600649 | 0.256745716 | -2.845211172 | 0.006136276 | 0.42524303   | 0.672282354 |
| ProSAPiP1 | 3.529936302  | 0.000666333 | 1.022663916  | 0.310743012 | 0.796125489  | 0.429307045 |
| QARS      | 0.197794836  | 0.843666007 | 1.591389616  | 0.116996089 | 1.974379571  | 0.053257094 |
| QDPR      | 0.276262482  | 0.783000263 | 3.566160048  | 0.000737065 | 3.084279101  | 0.00316118  |
| QKI       | -0.388858272 | 0.698329009 | -0.578935832 | 0.564889773 | -2.349749358 | 0.02232137  |
| QPCT      | -3.899082308 | 0.000189268 | 0.213357536  | 0.831801526 | 0.046649623  | 0.962957749 |
| QPCTL     | 0.749847201  | 0.455365336 | 0.530843504  | 0.597568291 | 1.183643688  | 0.241533363 |
| QPRT      | -0.091012079 | 0.927691762 | 0.551453939  | 0.583455694 | 2.063815338  | 0.043660964 |
| QRICH1    | 0.771569064  | 0.442455847 | -0.626704504 | 0.533329195 | 0.617846562  | 0.53917057  |
| QRICH2    | 2.483759011  | 0.014913127 | 2.114533409  | 0.038809105 | 1.451235901  | 0.152269928 |

|           |              |             |              |             |              |             |
|-----------|--------------|-------------|--------------|-------------|--------------|-------------|
| QRSL1     | 1.078501375  | 0.283784781 | 0.906614575  | 0.36838802  | 1.366234216  | 0.177303935 |
| QSER1     | 1.258915954  | 0.211420923 | -0.816845298 | 0.417382748 | -1.302967511 | 0.197895868 |
| QSOX1     | -2.000681203 | 0.048537709 | 2.495021059  | 0.015484386 | 1.99793466   | 0.050568642 |
| QSOX2     | 1.840801121  | 0.069052063 | 0.772516441  | 0.442967161 | 0.62529037   | 0.534309745 |
| QTRT1     | 0.694015298  | 0.489517628 | -0.756303987 | 0.452549362 | -0.412443668 | 0.681582382 |
| QTRTD1    | -0.075869451 | 0.939696779 | -0.18061928  | 0.857300461 | -0.239019328 | 0.811959526 |
| R3HCC1    | 0.023613619  | 0.981214768 | 1.106794575  | 0.272983946 | 1.131197063  | 0.262773104 |
| R3HDM1    | 0.470084954  | 0.639468029 | -1.763725401 | 0.083081681 | -1.340860166 | 0.185356931 |
| R3HDM2    | -0.700881767 | 0.485243128 | -2.403782792 | 0.019466005 | -1.866387739 | 0.067204469 |
| RAB10     | -0.246783435 | 0.80565596  | -1.01273361  | 0.315422994 | -1.978903788 | 0.052731411 |
| RAB11A    | -1.991595161 | 0.049545384 | 0.087558985  | 0.930530916 | -0.319394937 | 0.750610511 |
| RAB11B    | -0.825253804 | 0.411479767 | -1.563387992 | 0.123439623 | -1.113214818 | 0.270351888 |
| RAB11FIP1 | -4.042888339 | 0.000113573 | -0.250313659 | 0.803235519 | -0.740276029 | 0.462212045 |
| RAB11FIP2 | 0.646669024  | 0.51954491  | -1.276835852 | 0.206784021 | -2.082259875 | 0.041879996 |
| RAB11FIP3 | 1.567825198  | 0.12054426  | 0.001437989  | 0.99885762  | 0.783670468  | 0.436521716 |
| RAB11FIP4 | -3.18527176  | 0.002006708 | 0.475675831  | 0.636104557 | 0.99445812   | 0.324259658 |
| RAB11FIP5 | -0.63855581  | 0.524785759 | -0.114160136 | 0.909507875 | 0.557034412  | 0.579714204 |
| RAB12     | 0.40927189   | 0.683343815 | -1.108842223 | 0.272106875 | -1.051807077 | 0.297386729 |
| RAB13     | -0.684519137 | 0.495462983 | 0.893043232  | 0.375555025 | 0.071579053  | 0.943190867 |
| RAB14     | -0.677114858 | 0.500125731 | 0.639483989  | 0.52504352  | -0.808078423 | 0.422450574 |
| RAB15     | 0.77553359   | 0.440122885 | 0.038743154  | 0.969229146 | 0.162847906  | 0.871221959 |
| RAB18     | -0.156609249 | 0.875914881 | -1.31499425  | 0.193723449 | -1.82020607  | 0.074050636 |
| RAB19     | -1.146113256 | 0.254884137 | -0.18854998  | 0.851108321 | 0.150740909  | 0.880719499 |
| RAB1A     | -1.635697353 | 0.105508125 | -0.99055171  | 0.326047745 | -1.993531901 | 0.051062093 |
| RAB1B     | -2.51683806  | 0.013670704 | -0.911705104 | 0.365724158 | -0.449066985 | 0.655109165 |
| RAB20     | -3.091530769 | 0.002673779 | 1.620363177  | 0.110617039 | 0.390266243  | 0.697814033 |
| RAB21     | -2.621544139 | 0.010327618 | -1.892393223 | 0.063468196 | -3.570861031 | 0.000737404 |
| RAB22A    | -0.849076882 | 0.398163793 | -0.882251332 | 0.381308195 | -1.374546143 | 0.174724974 |
| RAB23     | 0.85311324   | 0.395934104 | -0.103134986 | 0.9182141   | -1.197374518 | 0.236183386 |
| RAB24     | -0.871333119 | 0.385965232 | 0.028599093  | 0.977283201 | -0.361764932 | 0.718883472 |
| RAB25     | 0.824145245  | 0.412105878 | 2.385358319  | 0.020373618 | 1.926562153  | 0.059093313 |
| RAB27A    | -1.612344703 | 0.11050103  | -0.170856236 | 0.864935614 | -1.12785738  | 0.264169138 |
| RAB27B    | -2.031562154 | 0.045242754 | -0.964637549 | 0.338759215 | -1.468893272 | 0.147433675 |
| RAB28     | 0.264521728  | 0.792002223 | -0.212416617 | 0.832531991 | -0.66349552  | 0.509724112 |
| RAB2A     | -0.906472354 | 0.367184255 | -1.245763856 | 0.217894911 | -1.598087272 | 0.115627723 |
| RAB2B     | 0.787482913  | 0.433134772 | -4.193286258 | 9.59E-05    | -3.31318168  | 0.001617127 |
| RAB30     | 0.347639063  | 0.728949101 | -0.886537091 | 0.379014929 | -0.55277081  | 0.58261101  |
| RAB31     | -3.388391812 | 0.00105717  | 0.767182675  | 0.44610642  | -0.193675155 | 0.847128102 |
| RAB32     | -3.306956061 | 0.001371124 | 0.98036195   | 0.331007602 | 0.409051705  | 0.68405541  |
| RAB33A    | 0.657583923  | 0.512537859 | -0.117390063 | 0.906959362 | 1.003207886  | 0.320057755 |
| RAB33B    | -0.301394717 | 0.763831172 | -0.185726077 | 0.853312112 | -1.750270659 | 0.085525748 |
| RAB34     | 1.226949283  | 0.223144481 | 2.501421119  | 0.015234822 | 2.231508568  | 0.029650541 |
| RAB35     | -2.208084128 | 0.029862579 | -2.087295695 | 0.041296418 | -2.01095789  | 0.049132976 |
| RAB36     | -2.556415201 | 0.012306934 | 0.222713603  | 0.824546334 | 0.05166543   | 0.958978366 |
| RAB37     | -3.976506129 | 0.000143965 | -1.45521274  | 0.151039254 | -0.13923337  | 0.889763167 |
| RAB38     | -1.375356142 | 0.172544563 | -1.521990821 | 0.13348303  | -0.573904292 | 0.568320905 |
| RAB39     | -0.87997735  | 0.381290626 | -0.218717942 | 0.827642939 | -0.660954533 | 0.511340205 |
| RAB39B    | 0.099074331  | 0.921306686 | -1.430408624 | 0.158002673 | -1.785530441 | 0.079567874 |
| RAB3A     | 0.813768002  | 0.417994735 | -1.10187737  | 0.275098238 | -1.319840464 | 0.192235898 |
| RAB3D     | -3.346941059 | 0.001207393 | 0.634000041  | 0.528590781 | 0.654301267  | 0.51558473  |
| RAB3GAP1  | 0.959384605  | 0.340017959 | 3.129242628  | 0.002749927 | 2.614563006  | 0.011445621 |
| RAB3GAP2  | 0.686866595  | 0.493989646 | -0.225833081 | 0.822130707 | -1.704936882 | 0.093725215 |
| RAB3IL1   | -1.380308425 | 0.171020474 | 1.626033027  | 0.109402305 | 0.530458144  | 0.597882842 |
| RAB3IP    | 0.215364524  | 0.829986115 | 0.289256173  | 0.77342399  | -0.089094932 | 0.929323004 |
| RAB40B    | 0.992139175  | 0.32387511  | -1.184309091 | 0.241155032 | -1.774062864 | 0.081466368 |
| RAB40C    | 0.063467697  | 0.949539362 | -1.23362528  | 0.222353113 | -0.814548193 | 0.418767007 |
| RAB42     | -0.644463879 | 0.520853787 | 0.148037461  | 0.88283025  | -0.183058363 | 0.855410602 |
| RAB43     | 0.854727755  | 0.395044396 | -1.989136943 | 0.051442957 | -2.505994895 | 0.015130278 |
| RAB4A     | 0.677456865  | 0.499909836 | 0.223013122  | 0.824314321 | 0.193003022  | 0.847651951 |
| RAB5A     | -1.8773674   | 0.063811455 | -1.462684284 | 0.148989425 | -2.361217625 | 0.021704664 |
| RAB5B     | -2.035391817 | 0.044847819 | -0.945565712 | 0.348320174 | -0.55464043  | 0.581339886 |
| RAB5C     | -2.834613294 | 0.005701047 | -1.520057096 | 0.133967595 | -1.962881662 | 0.05461334  |
| RAB6A     | -0.446198136 | 0.6565603   | -0.802806026 | 0.425387275 | -1.660774471 | 0.10232481  |
| RAB6B     | -1.988889751 | 0.049848852 | -0.505176142 | 0.615362784 | -0.14942473  | 0.881753087 |
| RAB7A     | -2.275464415 | 0.025329705 | -0.792855625 | 0.431115829 | -0.796837868 | 0.428896556 |
| RAB7L1    | 1.121555919  | 0.265130714 | -1.196908597 | 0.236245497 | 0.301503868  | 0.764142393 |
| RAB8A     | -2.744971423 | 0.007347994 | -0.720889958 | 0.473893159 | -0.728918431 | 0.469076405 |
| RAB8B     | -0.331138179 | 0.741334655 | -1.274503483 | 0.20760311  | -2.168925094 | 0.034332075 |
| RAB9A     | -0.10543648  | 0.916271662 | -0.218215648 | 0.828032409 | -0.419891692 | 0.676164483 |
| RAB9B     | 1.324315188  | 0.188859482 | -1.21285596  | 0.230135985 | 0.092779252  | 0.926408672 |
| RABAC1    | -0.699584665 | 0.486049019 | 0.209910237  | 0.834478493 | 0.466388311  | 0.642739216 |
| RABEP1    | 1.637987296  | 0.105028485 | 0.238254895  | 0.812529013 | -0.69931926  | 0.487235022 |

|          |              |             |              |             |              |             |
|----------|--------------|-------------|--------------|-------------|--------------|-------------|
| RABEP2   | 0.113774851  | 0.909677854 | 1.234476082  | 0.222038466 | 2.023813335  | 0.04775039  |
| RABEPK   | 1.2160583    | 0.227244825 | -0.547365122 | 0.586242731 | 1.453759009  | 0.151571364 |
| RABGAP1  | 0.312586941  | 0.755340912 | 2.029951101  | 0.046989337 | 1.567584079  | 0.122588399 |
| RABGAP1L | 1.269609574  | 0.207602011 | 1.70995866   | 0.0926561   | 2.242396561  | 0.028896294 |
| RABGEF1  | 0.108507287  | 0.913842626 | 1.031886832  | 0.306438731 | 0.506862414  | 0.614233084 |
| RABGGTA  | -0.384925628 | 0.701229897 | 0.912598474  | 0.365257935 | 1.647335765  | 0.105066154 |
| RABGGTB  | 1.014886945  | 0.312967796 | -0.32652441  | 0.745211202 | 0.035740714  | 0.97161567  |
| RABIF    | -1.698617487 | 0.092957255 | -3.741914698 | 0.000423102 | -3.001512998 | 0.004001192 |
| RABL2A   | 0.353075434  | 0.724884089 | -2.114686842 | 0.038795472 | -0.962277684 | 0.340029643 |
| RABL2B   | 0.779624566  | 0.437723055 | -1.190604631 | 0.238692766 | -0.066122384 | 0.947514899 |
| RABL3    | 1.16723619   | 0.246297341 | -1.297625893 | 0.199589028 | -0.77963161  | 0.438876575 |
| RABL5    | 0.758248283  | 0.450347094 | 0.269965767  | 0.788151525 | 0.805127887  | 0.424136916 |
| RAC1     | -2.907525857 | 0.004619209 | 0.495766789  | 0.621945424 | 0.136500613  | 0.891913027 |
| RAC2     | -2.502774098 | 0.014187106 | -0.585554329 | 0.560462457 | -0.538955691 | 0.592044717 |
| RAC3     | -0.869492011 | 0.386965442 | 1.178899424  | 0.243285439 | 2.089707489  | 0.041178961 |
| RACGAP1  | 0.283566344  | 0.777414981 | 1.43827057   | 0.155769021 | 1.958697678  | 0.055114153 |
| RAD1     | 1.329991659  | 0.186989776 | -0.394150396 | 0.694925576 | 0.206610963  | 0.837059937 |
| RAD17    | 1.39465977   | 0.166661704 | -0.053050008 | 0.957875636 | 0.264824021  | 0.792113273 |
| RAD18    | 0.423134564  | 0.673238964 | 0.140912488  | 0.888430753 | 0.428805356  | 0.669703021 |
| RAD21    | -1.484039789 | 0.141404601 | 0.527053735  | 0.600180497 | -0.253051404 | 0.801151239 |
| RAD23A   | -1.229894124 | 0.222045084 | 0.001760832  | 0.998601145 | 0.079438731  | 0.93696567  |
| RAD23B   | -1.442770759 | 0.15266806  | -0.193770851 | 0.847037075 | -0.467970156 | 0.641614533 |
| RAD50    | 3.194853917  | 0.001948076 | 1.3031665    | 0.197703583 | 1.94363035   | 0.056950371 |
| RAD51    | 1.876213531  | 0.063971569 | 1.400530353  | 0.166718962 | 2.430306491  | 0.018301373 |
| RAD51AP1 | 0.81068512   | 0.419753871 | -0.342840983 | 0.732966217 | -0.798162168 | 0.428134088 |
| RAD51B   | 0.277468766  | 0.782077021 | 0.592430963  | 0.555880813 | 1.3410203    | 0.185305251 |
| RAD51C   | -0.531754461 | 0.596248366 | -1.580031218 | 0.119576374 | -1.117330774 | 0.268603739 |
| RAD51D   | 1.641979585  | 0.104196493 | -0.893266678 | 0.375431613 | -0.415263461 | 0.679529183 |
| RAD52    | 0.633045824  | 0.528360653 | 0.767606212  | 0.445856667 | -0.558430325 | 0.578767293 |
| RAD54B   | 1.582797746  | 0.117088412 | -1.067991592 | 0.289980208 | -1.234894008 | 0.222004699 |
| RAD54L   | 1.499828297  | 0.137271337 | 1.119019699  | 0.267776922 | 2.99717268   | 0.004050532 |
| RAD54L2  | 1.322015818  | 0.189620822 | 0.281427225  | 0.779391362 | 0.191917865  | 0.84849785  |
| RAD9A    | 0.02961668   | 0.976440451 | -0.080179425 | 0.936372501 | 0.64038735   | 0.524521604 |
| RAD9B    | -0.855187605 | 0.394791212 | -0.332336647 | 0.740841564 | 1.708735937  | 0.093014089 |
| RAE1     | -0.434927751 | 0.664689511 | 2.547166112  | 0.013554325 | 3.109036105  | 0.002943947 |
| RAF1     | -2.94875247  | 0.004094598 | -1.518134998 | 0.13445063  | -1.37322109  | 0.175134164 |
| RAG1     | 0.105364605  | 0.916328525 | -1.19399644  | 0.237373756 | -1.67137928  | 0.100203044 |
| RAGE     | 0.679269479  | 0.498766449 | -1.380862018 | 0.172656195 | -1.42453906  | 0.159816381 |
| RAI1     | 1.950723548  | 0.054301722 | -1.161729477 | 0.25013703  | -0.742369965 | 0.460952815 |
| RAI14    | 0.080920126  | 0.935690935 | 1.64116224   | 0.106213858 | 1.967611903  | 0.05405184  |
| RAI2     | -0.670616642 | 0.504237333 | 1.67376098   | 0.099600556 | 1.58409628   | 0.118779764 |
| RALA     | 1.18781975   | 0.238130181 | -0.420926551 | 0.675375267 | 0.329736467  | 0.742824184 |
| RALB     | -3.408173965 | 0.000991848 | 0.508581988  | 0.612987877 | -0.231887998 | 0.817466751 |
| RALBP1   | -2.461798013 | 0.015792926 | 1.545954719  | 0.127592829 | 1.329494161  | 0.189053029 |
| RALGAPA1 | 1.486419276  | 0.140775521 | -1.292839623 | 0.2012286   | -1.122120623 | 0.266579425 |
| RALGAPA2 | -1.862945279 | 0.065837087 | 0.024364838  | 0.980645814 | 0.208087841  | 0.835912165 |
| RALGAPB  | 1.002992389  | 0.318640054 | 0.446207685  | 0.657120273 | 0.045410568  | 0.963940927 |
| RALGDS   | 0.730425364  | 0.467088385 | -2.271005782 | 0.026901959 | -1.46560113  | 0.148326115 |
| RALGPS1  | 1.015444593  | 0.312703536 | -1.134519685 | 0.261276291 | -1.642491104 | 0.106068972 |
| RALGPS2  | 0.576393523  | 0.565834256 | 0.192270548  | 0.848206591 | -0.586771884 | 0.55970516  |
| RALY     | -1.900385495 | 0.060687092 | -0.206128889 | 0.837417128 | -0.057440618 | 0.954397819 |
| RAMP1    | -1.74678068  | 0.084196909 | 0.094737083  | 0.924852485 | 0.202483788  | 0.840269299 |
| RAN      | 1.634669271  | 0.105724036 | 0.573212952  | 0.568731846 | 1.320600704  | 0.191983785 |
| RANBP1   | 2.275765129  | 0.025310913 | 0.011051145  | 0.991220832 | 1.540814774  | 0.128970416 |
| RANBP10  | -2.205010736 | 0.030085279 | 0.871006987  | 0.38736636  | 0.90818587   | 0.36765558  |
| RANBP2   | 0.581452275  | 0.562435914 | 2.768686157  | 0.007558786 | 2.270586248  | 0.027021753 |
| RANBP3   | -0.654010651 | 0.514826267 | -0.424355146 | 0.672887724 | 0.237336027  | 0.813258618 |
| RANBP6   | 0.284650473  | 0.776586933 | -0.518994674 | 0.605752981 | -1.406113216 | 0.165192052 |
| RANBP9   | -0.013950242 | 0.988901551 | -2.0801415   | 0.041972275 | -2.691375976 | 0.009354489 |
| RANGAP1  | -0.813189677 | 0.418324399 | 3.104014749  | 0.00295839  | 3.177950968  | 0.002410622 |
| RANGRF   | 0.395640381  | 0.693336771 | 1.894857612  | 0.063134558 | 2.23220616   | 0.0296017   |
| RAP1A    | -1.699572373 | 0.092776604 | -1.574993437 | 0.120735358 | -1.76372334  | 0.083210323 |
| RAP1B    | -0.105329214 | 0.916356525 | -2.251699366 | 0.028170895 | -2.434074762 | 0.01813035  |
| RAP1GAP  | -3.439846389 | 0.000895121 | 0.734087574  | 0.465873336 | 0.459964064  | 0.647315448 |
| RAP1GAP2 | -1.227017939 | 0.223118805 | -0.767408231 | 0.445973403 | -0.310504867 | 0.757324956 |
| RAP1GDS1 | 2.06764857   | 0.041637164 | 0.384818389  | 0.701789304 | 1.35806433   | 0.179867095 |
| RAP2A    | 0.788906893  | 0.432306387 | -1.565983189 | 0.122830723 | -2.124451691 | 0.038041789 |
| RAP2B    | -1.113996311 | 0.268342314 | 0.251614084  | 0.80223498  | -0.157867845 | 0.875126427 |
| RAP2C    | -0.16059594  | 0.87278316  | -1.012253051 | 0.315650673 | -1.684466281 | 0.097634442 |
| RAPGEF1  | 0.327854415  | 0.743807722 | -0.702520702 | 0.485184171 | -0.113340815 | 0.910164007 |
| RAPGEF2  | -2.193751624 | 0.030913573 | -1.306999082 | 0.196407217 | -2.32271155  | 0.023837647 |
| RAPGEF3  | -0.229924473 | 0.818689026 | 1.310203816  | 0.195328135 | 1.00634949   | 0.31855802  |

|           |              |             |              |             |              |             |
|-----------|--------------|-------------|--------------|-------------|--------------|-------------|
| RAPGEF5   | 0.154242682  | 0.877774861 | -1.022598001 | 0.310773921 | 0.002681524  | 0.997869946 |
| RAPGEF6   | 1.229508314  | 0.222188894 | -0.972274429 | 0.334979666 | -0.945168124 | 0.348616415 |
| RAPGEFL1  | -0.53332142  | 0.595168015 | 0.542816469  | 0.589350627 | 1.054936626  | 0.295965546 |
| RAPH1     | 4.235411689  | 5.64E-05    | -0.573439    | 0.568579846 | -0.377510826 | 0.707215034 |
| RAPSN     | -0.104506576 | 0.917007383 | 1.195774709  | 0.236684337 | 1.128900164  | 0.263732677 |
| RARA      | -2.56793349  | 0.011933742 | -1.447286674 | 0.153237819 | -2.070776214 | 0.042981262 |
| RARB      | -1.02229498  | 0.309469449 | 1.628688334  | 0.108837152 | 3.244957456  | 0.001980232 |
| RARG      | 2.217333623  | 0.029201029 | -1.320436201 | 0.191912594 | 0.132307946  | 0.895212981 |
| RARRES3   | -1.070849709 | 0.287192397 | 0.614249437  | 0.541469321 | 1.444128912  | 0.154251145 |
| RARS      | 1.877392235  | 0.063808012 | 1.881209523  | 0.065001133 | 3.939230254  | 0.000228025 |
| RARS2     | 0.129182123  | 0.897511081 | -1.755461757 | 0.084497418 | -1.514474013 | 0.135506264 |
| RASA1     | 1.594641929  | 0.114411069 | -1.303395472 | 0.197625954 | -2.357768404 | 0.021888525 |
| RASA2     | 1.00708103   | 0.316682593 | -0.762868622 | 0.448654998 | -1.75152375  | 0.085307835 |
| RASA3     | 1.670763417  | 0.098354448 | 0.794184175  | 0.430348323 | 0.814704882  | 0.418678037 |
| RASA4     | 1.821563127  | 0.071950634 | 1.98431086   | 0.051992819 | 1.34589379   | 0.183737692 |
| RASA4P    | -0.574804189 | 0.566903997 | 0.028841921  | 0.977090372 | 0.787847063  | 0.43409443  |
| RASAL2    | -0.474627421 | 0.636239213 | 2.414971365  | 0.018932692 | 2.450040289  | 0.017421585 |
| RASAL3    | -0.197996276 | 0.843508884 | -0.500454061 | 0.618662355 | 0.845077136  | 0.401648865 |
| RASD1     | 2.348347272  | 0.021119157 | -0.798372484 | 0.427934061 | -0.909858194 | 0.366780526 |
| RASGEF1A  | -2.395144777 | 0.018754306 | -1.5125589   | 0.135859757 | -0.789971335 | 0.432862959 |
| RASGEF1B  | -0.719434594 | 0.473797166 | 2.201196223  | 0.031743783 | 1.556167532  | 0.125278527 |
| RASGRF1   | 0.157081962  | 0.87554344  | -0.124146727 | 0.901631353 | -0.133404691 | 0.894349576 |
| RASGRF2   | 1.715906414  | 0.089730594 | 0.450656474  | 0.653929106 | 0.860728085  | 0.393042714 |
| RASGRP1   | 1.541175544  | 0.126895784 | -0.735635047 | 0.464938072 | -0.930868813 | 0.355900402 |
| RASGRP2   | -0.488916541 | 0.626128394 | -0.813559797 | 0.419247776 | 0.308941623  | 0.758507598 |
| RASGRP3   | 1.181013442  | 0.240808992 | 1.103531835  | 0.274385577 | 1.079337611  | 0.285044792 |
| RASGRP4   | -2.224494335 | 0.028697719 | -0.700198612 | 0.486622059 | -1.159229045 | 0.251261364 |
| RASIP1    | -1.345757027 | 0.181869986 | -0.206247947 | 0.837324567 | 0.012828182  | 0.989810274 |
| RASL11A   | -0.471718226 | 0.638306284 | -1.544206108 | 0.128015493 | -0.64086453  | 0.524213768 |
| RASSF1    | 1.474479873  | 0.143954185 | 0.406529554  | 0.685860192 | 1.11720973   | 0.268655035 |
| RASSF2    | -3.196885437 | 0.001935853 | 0.08001717   | 0.936500981 | -0.556564965 | 0.580032819 |
| RASSF3    | -1.42599049  | 0.157441762 | 0.126145311  | 0.900056217 | -0.856512003 | 0.395349692 |
| RASSF4    | 0.879113909  | 0.38175596  | 1.533185128  | 0.130705182 | 2.08668126   | 0.041462576 |
| RASSF5    | -1.657202948 | 0.101072703 | 0.468314198  | 0.641327408 | 0.673407264  | 0.503446474 |
| RASSF6    | 2.465933368  | 0.01562379  | 0.026299656  | 0.97910924  | -1.097415581 | 0.277136531 |
| RASSF7    | 0.969683965  | 0.334886362 | 0.350012901  | 0.727605727 | 0.422541413  | 0.674241129 |
| RAVER1    | -1.009551358 | 0.315503806 | -0.365473299 | 0.716096919 | 0.168761757  | 0.866589571 |
| RAVER2    | -0.491408384 | 0.62437242  | 0.319679289  | 0.750368161 | 0.588456223  | 0.55858221  |
| RB1       | 0.293527322  | 0.769816671 | -0.397262722 | 0.692642107 | -1.546929999 | 0.127489612 |
| RB1CC1    | -0.295065789 | 0.768645097 | -0.062190946 | 0.950626089 | -1.190204044 | 0.238966404 |
| RBAK      | 1.071026953  | 0.287113146 | -0.681645664 | 0.498194885 | -0.48229093  | 0.631471203 |
| RBBP4     | 2.639353336  | 0.009839045 | 1.851090306  | 0.069286136 | 2.108147807  | 0.039486962 |
| RBBP5     | -0.648396273 | 0.518432726 | -0.099750502 | 0.920888794 | -0.358354667 | 0.721419641 |
| RBBP6     | -0.276955046 | 0.782470164 | -1.320410499 | 0.191921117 | -2.66008801  | 0.010162121 |
| RBBP7     | 0.611233341  | 0.542635464 | 0.802415032  | 0.42561151  | 1.36663359   | 0.177179358 |
| RBBP8     | 0.347838598  | 0.728799761 | 0.469750103  | 0.640307235 | -0.853791942 | 0.39684252  |
| RBBP9     | -0.42857372  | 0.669290433 | -0.567651724 | 0.572477631 | -0.125737938 | 0.90038781  |
| RBCK1     | -2.165910156 | 0.033047783 | -0.922625363 | 0.360051353 | -0.948698307 | 0.346833233 |
| RBFA      | 0.955610855  | 0.341910978 | 0.624490972  | 0.534771219 | 1.688507788  | 0.096852216 |
| RBFOX2    | 0.846339617  | 0.399680231 | 0.196428521  | 0.84496622  | 0.861414852  | 0.39266772  |
| RBFOX3    | 1.773918499  | 0.07956785  | -0.180707234 | 0.857231738 | 0.957267399  | 0.342529622 |
| RBKS      | 0.886416068  | 0.377831786 | -1.720889198 | 0.090639249 | 1.156068367  | 0.252540978 |
| RBL1      | 2.000303001  | 0.048579301 | -1.0200273   | 0.311980995 | -0.524547964 | 0.601959119 |
| RBL2      | 2.099375903  | 0.038674317 | 0.116052951  | 0.908014267 | 0.339325367  | 0.735628565 |
| RBM10     | -1.640173628 | 0.104572192 | 0.247640483  | 0.805293282 | 0.802893656  | 0.425416549 |
| RBM11     | 0.298665678  | 0.765905814 | 0.589621869  | 0.557750139 | -0.228199936 | 0.820318538 |
| RBM12     | 0.090935104  | 0.927752748 | 1.624881835  | 0.109648062 | 0.424427426  | 0.672873457 |
| RBM12B    | 0.831945643  | 0.407712449 | -0.7578357   | 0.451638949 | -1.704880406 | 0.09373582  |
| RBM14     | 0.738548608  | 0.462164583 | -1.335731621 | 0.186891348 | -0.178596929 | 0.858896054 |
| RBM15     | 1.086171695  | 0.280396913 | -1.022834816 | 0.310662883 | -3.200308916 | 0.002258082 |
| RBM15B    | 0.428953541  | 0.669015048 | -1.050445778 | 0.297900765 | -1.047682411 | 0.299266956 |
| RBM17     | 1.972643624  | 0.051704728 | 2.647919158  | 0.010430654 | 3.373466203  | 0.00134953  |
| RBM18     | -0.959149469 | 0.34013571  | -0.889800798 | 0.377274407 | -1.537461089 | 0.129788319 |
| RBM19     | 2.24609104   | 0.027225477 | 1.384356291  | 0.171589694 | 2.309525187  | 0.024609894 |
| RBM20     | 1.441442296  | 0.153041854 | 1.042635442  | 0.301473802 | 0.676005372  | 0.501807914 |
| RBM22     | -2.931168739 | 0.004311239 | 0.160787596  | 0.872823325 | 0.201369153  | 0.841136528 |
| RBM23     | -3.068722474 | 0.002864708 | 0.967084802  | 0.337545004 | 0.72353394   | 0.472350839 |
| RBM25     | 2.594171517  | 0.011121465 | 0.024722548  | 0.980361726 | -0.960114766 | 0.341107397 |
| RBM26     | -0.451593987 | 0.652682846 | 1.507959935  | 0.137030739 | 0.803858004  | 0.424863945 |
| RBM26-AS1 | 0.979750097  | 0.329920277 | -1.691410184 | 0.096163095 | -1.000781275 | 0.321219407 |
| RBM27     | 0.286288068  | 0.775336643 | -0.719908402 | 0.474492719 | -1.908098049 | 0.061488522 |
| RBM28     | 3.417260481  | 0.000963136 | 1.142755251  | 0.257868236 | 1.910937329  | 0.061114918 |

|        |               |             |              |             |              |             |
|--------|---------------|-------------|--------------|-------------|--------------|-------------|
| RBM3   | 0.926782326   | 0.356597918 | -0.334679604 | 0.739082543 | 0.573652429  | 0.568490193 |
| RBM33  | 1.288967577   | 0.200818772 | -0.801643941 | 0.426053939 | -0.829017426 | 0.410599492 |
| RBM34  | 1.333435075   | 0.185862386 | 0.818476584  | 0.416458609 | 2.048241912  | 0.045215479 |
| RBM38  | -2.819145648  | 0.005958561 | -0.126932384 | 0.899436016 | -0.07339122  | 0.941755224 |
| RBM39  | 0.903653382   | 0.368669204 | -0.128738646 | 0.898012946 | -0.770946511 | 0.443965738 |
| RBM4   | 2.101376788   | 0.038493731 | -3.236482173 | 0.002008199 | -1.376454737 | 0.17413687  |
| RBM41  | 1.036694952   | 0.302744717 | -0.258345786 | 0.797061004 | -0.402872429 | 0.688569565 |
| RBM42  | -0.793475176  | 0.429655145 | 0.292109199  | 0.77125275  | 0.237798277  | 0.812901822 |
| RBM43  | -1.109401657  | 0.270307523 | -2.143016811 | 0.03634874  | -2.182379641 | 0.033274147 |
| RBM44  | -0.518736429  | 0.605258668 | -0.240508606 | 0.810790011 | -1.439205777 | 0.155635321 |
| RBM45  | 0.797164507   | 0.427521041 | 0.18595244   | 0.853135414 | 1.422323942  | 0.16045536  |
| RBM47  | -1.192591312  | 0.236265006 | -0.695681186 | 0.489426106 | -2.465620844 | 0.016754059 |
| RBM48  | 0.467081949   | 0.641606412 | -1.49456015  | 0.140488158 | -1.147531037 | 0.256020645 |
| RBM5   | -0.248764616  | 0.804127902 | 1.506692331  | 0.137354895 | 2.14428989   | 0.036345795 |
| RBM6   | 0.535899909   | 0.593392238 | 1.84814964   | 0.069716976 | 2.884849163  | 0.005542393 |
| RBM7   | -0.653705352  | 0.515022038 | -2.077815713 | 0.042194052 | -2.029310603 | 0.047169492 |
| RBM8A  | 0.567669039   | 0.571718604 | -0.839073764 | 0.404897029 | -0.893688688 | 0.375297189 |
| RBMS1  | 0.152955129   | 0.87878709  | -0.986180349 | 0.328169398 | -1.854194329 | 0.068957989 |
| RBMS2  | -1.404919726  | 0.163598006 | 0.088727556  | 0.92960623  | 0.080422787  | 0.936186526 |
| RBMX   | 2.543422689   | 0.012740487 | 1.983838345  | 0.052046926 | 2.828637594  | 0.006467013 |
| RBMX2  | 0.699464623   | 0.486123638 | -0.062212429 | 0.950609056 | 0.883307972  | 0.380830424 |
| RBMXL1 | -0.428783195  | 0.66913855  | 1.138080924  | 0.259798671 | 0.108228203  | 0.914199901 |
| RBP5   | 0.024391611   | 0.980595978 | -0.737028181 | 0.464097006 | -0.29096731  | 0.772146757 |
| RBP7   | -3.160426975  | 0.00216649  | -0.722641832 | 0.47282413  | 0.145595134  | 0.884761616 |
| RBPJ   | -2.320236902  | 0.022663486 | 0.443622505  | 0.658977608 | -1.022619898 | 0.310866589 |
| RBPMS  | 1.488795955   | 0.140149372 | -0.900315602 | 0.371701367 | 0.349735386  | 0.727843666 |
| RBPMS2 | -2.928118518  | 0.004349878 | -0.406242424 | 0.686069942 | -1.230517227 | 0.223625707 |
| RBX1   | 0.758996137   | 0.449901927 | -1.505813711 | 0.137579935 | -0.969054112 | 0.336667567 |
| RC3H1  | -0.806593789  | 0.422095266 | -0.865749666 | 0.39021942  | -1.520752141 | 0.133925117 |
| RC3H2  | 0.584977688   | 0.560073574 | 0.094143024  | 0.925322286 | -0.649334444 | 0.518765569 |
| RCAN1  | 0.455036963   | 0.650213697 | 1.001723003  | 0.320667382 | -0.077560466 | 0.93845299  |
| RCAN2  | 0.264849943   | 0.791750182 | -0.724014894 | 0.471987213 | -0.818009371 | 0.416804376 |
| RCAN3  | 2.347337233   | 0.02117299  | 0.919263881  | 0.36179149  | 0.619364713  | 0.53817737  |
| RCBTB1 | 1.521041084   | 0.131867999 | 0.603452672  | 0.548576805 | -2.003970726 | 0.049898806 |
| RCBTB2 | -1.111920397  | 0.269228977 | 0.347126417  | 0.729761538 | -0.981170297 | 0.330711117 |
| RCC1   | 0.888619648   | 0.376652567 | 0.522416782  | 0.60338384  | 0.055290541  | 0.956102964 |
| RCC2   | 0.688204676   | 0.493150894 | 2.712101294  | 0.008799351 | 2.089442624  | 0.041203716 |
| RCCD1  | 0.751823826   | 0.45418176  | -2.364079193 | 0.021468845 | -2.526895469 | 0.014346835 |
| RCE1   | 0.79685434    | 0.427700216 | 0.689429113  | 0.493321562 | 1.174402766  | 0.245182903 |
| RCHY1  | -0.028479607  | 0.97734472  | -0.705506091 | 0.483339028 | -1.982228714 | 0.025347921 |
| RCL1   | 2.039572101   | 0.044420105 | 1.466685149  | 0.147900775 | 2.616379873  | 0.011391596 |
| RCN1   | 0.994134046   | 0.322908631 | 1.012733444  | 0.315423073 | 1.663224762  | 0.101831333 |
| RCN2   | 1.612192988   | 0.110534078 | 0.37252934   | 0.710866093 | 0.166385496  | 0.868450368 |
| RCN3   | -1.063350874  | 0.290559107 | -0.176978403 | 0.860146234 | 0.404040744  | 0.687715194 |
| RCOR1  | -2.235835245  | 0.027916138 | 0.770468628  | 0.444170893 | 0.068623909  | 0.945532409 |
| RCOR3  | -0.144846066  | 0.885166717 | -1.692371376 | 0.095978719 | -2.49174619  | 0.015686344 |
| RCS1   | -4.260657117  | 5.13E-05    | 1.130326453  | 0.263023768 | 0.710650723  | 0.480237652 |
| RCVRN  | -2.16030619   | 0.82946849  | 0.594861516  | 0.554265924 | 1.556220931  | 0.125265836 |
| RDBP   | -1.5287279529 | 0.116069491 | 0.905409983  | 0.369020189 | 1.995070608  | 0.050889169 |
| RDH10  | -0.223765321  | 0.823463398 | -1.247406895 | 0.217296565 | -1.173391871 | 0.245584536 |
| RDH11  | -0.378131342  | 0.706252087 | -0.048537032 | 0.96145617  | -0.876032812 | 0.384738806 |
| RDH13  | 2.134301005   | 0.035625275 | -0.138589327 | 0.890258098 | 0.838128198  | 0.4055069   |
| RDH14  | 0.4854174     | 0.628597842 | -1.89505681  | 0.063107655 | -2.004010144 | 0.049894457 |
| RDH16  | 1.125479415   | 0.263474529 | 0.559431569  | 0.578036267 | 1.600104075  | 0.115178975 |
| RDH5   | 0.670706434   | 0.504180396 | 0.571780648  | 0.56969543  | 1.97196679   | 0.053539277 |
| RDX    | 0.81025944    | 0.419997118 | 0.991101668  | 0.32578147  | 0.697348655  | 0.48845765  |
| REC8   | -0.577007071  | 0.565421556 | 0.833811238  | 0.4078321   | 0.635962895  | 0.527380405 |
| RECK   | 2.230248763   | 0.028298777 | -0.172531049 | 0.863624892 | -0.519755874 | 0.605273661 |
| RECQL  | 1.786126718   | 0.077555139 | -0.251740205 | 0.802137962 | -1.116187435 | 0.269088542 |
| RECQL4 | 0.676686814   | 0.500396009 | -0.059386772 | 0.952849622 | 0.142974641  | 0.88682126  |
| RECQL5 | 0.030797593   | 0.97550135  | 1.859175327  | 0.06811314  | 3.276844336  | 0.001801875 |
| REEP3  | 0.077690241   | 0.938252471 | -1.519832228 | 0.134024034 | -2.174510108 | 0.033889396 |
| REEP4  | -1.34750347   | 0.181309402 | -0.353710001 | 0.724847726 | -0.727577105 | 0.469890888 |
| REEP5  | -0.397173664  | 0.692210003 | 0.013647343  | 0.989158497 | -0.362478752 | 0.718353014 |
| REEP6  | 0.896621753   | 0.372389791 | 0.206723494  | 0.836954881 | 1.000356134  | 0.321423218 |
| REG4   | 0.48558806    | 0.628477304 | 0.341832462  | 0.733721093 | 0.172323136  | 0.863802158 |
| REL    | -0.379282125  | 0.705400531 | -1.882190537 | 0.064865424 | -1.919076047 | 0.060054674 |
| RELA   | -1.77483011   | 0.079416079 | -0.219122227 | 0.827329496 | -0.69488916  | 0.94484696  |
| RELB   | -1.204862092  | 0.231516761 | -0.111902987 | 0.911289405 | -1.579252828 | 0.119886934 |
| RELL1  | -3.430486998  | 0.000922737 | -1.429122775 | 0.158370352 | -1.560330173 | 0.124292244 |
| RELL2  | 1.68622951    | 0.09532702  | -3.322053579 | 0.001556104 | -2.74344362  | 0.008142656 |
| RELT   | -1.691479941  | 0.094316693 | -1.547888414 | 0.127126726 | -2.267631749 | 0.027213033 |

|           |              |             |              |             |              |             |
|-----------|--------------|-------------|--------------|-------------|--------------|-------------|
| REM2      | -1.794422397 | 0.076211686 | -2.55614936  | 0.013244753 | -2.10878106  | 0.03942995  |
| REBNP     | -1.123072166 | 0.264489813 | 0.764957077  | 0.44742016  | 0.711410855  | 0.479770279 |
| REPIN1    | 0.899026649  | 0.371114653 | -3.723059738 | 0.000449354 | -3.078987627 | 0.003209517 |
| REPS1     | 1.912195184  | 0.0591348   | 2.482797995  | 0.015971292 | 2.58605674   | 0.012324393 |
| REPS2     | -4.803487326 | 6.43E-06    | -0.707129078 | 0.482337571 | -1.454323725 | 0.151415356 |
| RER1      | 0.094571789  | 0.924871963 | -0.334225854 | 0.739423096 | 0.521538144  | 0.604039938 |
| RERE      | -1.918835302 | 0.058276826 | 1.28882029   | 0.202613223 | 0.344366399  | 0.731855202 |
| REREP3    | -0.717846025 | 0.474771269 | -2.42515416  | 0.018458756 | -2.223674613 | 0.030203926 |
| REST      | -0.253956031 | 0.80012746  | -0.360275575 | 0.71995891  | -0.890130084 | 0.377188262 |
| RET       | -0.090168621 | 0.928360038 | 0.119463962  | 0.905323508 | -0.733837642 | 0.466096222 |
| RETN      | -1.385724277 | 0.169365485 | -0.865159622 | 0.390540443 | 0.057865285  | 0.954061057 |
| RETSAT    | 1.201430143  | 0.232837774 | 1.256056185  | 0.214166737 | 0.680321597  | 0.499092203 |
| REV1      | 2.175108936  | 0.032328865 | -0.624908836 | 0.534498843 | -0.89504082  | 0.374580234 |
| REV3L     | 0.526770258  | 0.599690789 | -0.610366754 | 0.544019841 | -2.408028462 | 0.019342416 |
| REXO1     | 0.874033991  | 0.38450085  | -2.386866012 | 0.020297949 | -2.025261383 | 0.047596778 |
| REXO1L1   | -0.844156238 | 0.400892348 | 4.094656076  | 0.000133548 | 4.06666446   | 0.000150014 |
| REXO2     | 0.133508325  | 0.894099054 | 0.364232976  | 0.717017827 | -0.043349296 | 0.965576648 |
| REXO4     | 1.872206561  | 0.064530212 | 0.937653023  | 0.352338081 | 1.558600048  | 0.124701417 |
| RFC1      | 0.791433423  | 0.430838904 | 1.971736695  | 0.053449211 | 2.397052947  | 0.019874581 |
| RFC2      | -0.63774479  | 0.525311159 | 0.75341508   | 0.454269351 | 1.763018232  | 0.083330375 |
| RFC3      | 2.350151565  | 0.021023295 | 0.65145147   | 0.517346065 | 0.433225238  | 0.666508322 |
| RFC4      | 0.913977919  | 0.36324907  | 0.919049156  | 0.36190283  | 1.968571679  | 0.053938516 |
| RFC5      | 0.888346455  | 0.376798637 | -0.802590148 | 0.425511072 | -1.01536496  | 0.314280506 |
| RFESD     | 0.698732823  | 0.486578669 | -0.441024884 | 0.660846058 | -0.304664146 | 0.7617466   |
| RFPL      | -0.080629923 | 0.93592106  | -1.933286849 | 0.058121364 | -3.201583229 | 0.002249667 |
| RFL       | 0.917587364  | 0.361366225 | 0.093627205  | 0.925730235 | -0.629887204 | 0.531319386 |
| RFNG      | -0.649859838 | 0.51749131  | 0.346421795  | 0.730288129 | 0.489154356  | 0.62663486  |
| RFPL1-AS1 | -2.272698666 | 0.025503114 | -0.526965381 | 0.600241461 | 0.756734941  | 0.452367425 |
| RFPL2     | -0.802881645 | 0.424226382 | 0.755236469  | 0.453184497 | 1.144975173  | 0.257068993 |
| RFPL3-AS1 | -0.236757913 | 0.813399969 | 0.842730763  | 0.402865062 | -0.542275139 | 0.589771455 |
| RFPL4A    | -1.011443404 | 0.314602948 | -0.357394206 | 0.722102984 | 0.161918674  | 0.871950254 |
| RFT1      | 1.895160489  | 0.061384761 | 1.308512129  | 0.195897194 | 2.210003847  | 0.031191469 |
| RFTN1     | 0.774745131  | 0.440586288 | 1.217737408  | 0.228289124 | 1.399363367  | 0.167195907 |
| RFTN2     | 0.953137145  | 0.343155575 | 0.47650829   | 0.635515113 | -0.876882916 | 0.384280816 |
| RFWD2     | -2.457562905 | 0.015967839 | 1.25495412   | 0.214563665 | 0.609620859  | 0.544568315 |
| RFWD3     | 0.249644734  | 0.803449323 | 0.634160523  | 0.528486796 | 1.79221178   | 0.078478884 |
| RFX1      | -0.754861482 | 0.452366298 | -2.004601527 | 0.049714514 | -2.220210889 | 0.030451492 |
| RFX2      | -1.709816011 | 0.090856632 | -0.638092427 | 0.525942459 | -1.550318737 | 0.126674895 |
| RFX3      | -0.344260513 | 0.73147931  | 1.085881716  | 0.282055253 | -0.902436377 | 0.370674212 |
| RFX5      | 1.05975584   | 0.292182691 | 0.994682838  | 0.324051117 | 0.563117564  | 0.575593198 |
| RFX7      | 1.168714787  | 0.245704086 | -0.810687422 | 0.420882405 | -1.982295155 | 0.052340283 |
| RFXANK    | -1.466152937 | 0.146204031 | 1.631669024  | 0.108205571 | 1.492048431  | 0.141275315 |
| RFXAP     | 0.774551162  | 0.440700334 | -2.315939182 | 0.024142838 | -2.268116583 | 0.027181562 |
| RG9MTD1   | 0.178922438  | 0.858413721 | -0.877813271 | 0.383692146 | -0.404015888 | 0.687733367 |
| RG9MTD2   | 0.70512159   | 0.482614062 | -0.321416819 | 0.749058051 | -0.615379176 | 0.540786786 |
| RG9MTD3   | 0.870590492  | 0.386368482 | -0.673148424 | 0.503544991 | 1.152875623  | 0.253838303 |
| RGAG4     | -0.989999071 | 0.324914082 | -0.505893159 | 0.614862461 | -0.221989562 | 0.825126197 |
| RGL1      | 0.730597223  | 0.46698391  | 3.282759951  | 0.001750256 | 1.614278545  | 0.112064639 |
| RGL2      | -0.882316529 | 0.380031752 | -0.926460554 | 0.35807259  | -0.295562618 | 0.768652695 |
| RGL3      | -2.018517866 | 0.046610408 | -0.378708503 | 0.706296756 | -0.627134879 | 0.533108797 |
| RGL4      | -0.023136017 | 0.981594643 | -1.307384651 | 0.196277154 | -0.765442094 | 0.447208971 |
| RGMB      | 1.834114866  | 0.070048213 | 2.671408218  | 0.009804026 | 1.845298652  | 0.070261483 |
| RGNEF     | -0.01329459  | 0.989423138 | -1.916865255 | 0.060220506 | -1.0138089   | 0.315016018 |
| RGP1      | 0.181489475  | 0.856404648 | -1.869604677 | 0.066624813 | -1.901022195 | 0.062428049 |
| RGPD1     | 0.753813143  | 0.452992369 | -0.918795743 | 0.362034259 | 0.862521154  | 0.392064117 |
| RGS1      | -0.037157754 | 0.970444167 | -1.050861367 | 0.297711459 | -0.816630735 | 0.417585451 |
| RGS10     | -1.808631727 | 0.073955427 | 0.193707289  | 0.847086616 | 0.510433668  | 0.611174548 |
| RGS12     | 0.696378778  | 0.488043996 | 1.552054177  | 0.126127219 | 2.280954299  | 0.026359901 |
| RGS14     | -0.833924357 | 0.406602506 | 0.438337455  | 0.662781392 | -0.233350059 | 0.816336899 |
| RGS16     | -0.024660975 | 0.980381737 | 2.489196294  | 0.015714719 | 0.794474817  | 0.4302591   |
| RGS18     | -1.292735735 | 0.199517718 | -0.247189616 | 0.805640489 | -0.959005806 | 0.341660847 |
| RGS19     | -1.42544675  | 0.15759835  | -1.181071846 | 0.242428281 | -1.739666986 | 0.087388279 |
| RGS2      | -3.883419765 | 0.00019996  | 0.250184586  | 0.803334845 | 0.127170169  | 0.899259343 |
| RGS3      | -1.155398115 | 0.251083955 | -1.845397545 | 0.070122231 | -2.005500979 | 0.049730208 |
| RGS5      | 0.75178125   | 0.454207236 | -0.314402135 | 0.754351693 | -0.166281496 | 0.868531825 |
| RGS6      | -2.670724621 | 0.009029105 | 2.182750931  | 0.033144869 | 2.120880153  | 0.038354359 |
| RGS9      | -0.954793737 | 0.342321769 | -2.290065786 | 0.025699156 | -1.260705174 | 0.212620642 |
| RHBDD1    | 0.065160706  | 0.948195219 | 0.324750517  | 0.7465465   | 0.979185385  | 0.331682097 |
| RHBDD2    | -2.759757369 | 0.007049421 | 0.720135397  | 0.474354026 | 0.659292218  | 0.512398938 |
| RHBDD3    | 1.225776076  | 0.223583576 | 0.495200879  | 0.622342324 | 1.196103739  | 0.23667488  |
| RHBDF2    | -0.568601133 | 0.57108853  | -0.737324472 | 0.46391824  | -1.666527664 | 0.101169224 |
| RHBDL1    | 0.128606198  | 0.897965454 | 0.38232898   | 0.70362453  | -0.190043621 | 0.849959277 |

|              |              |             |              |             |              |             |
|--------------|--------------|-------------|--------------|-------------|--------------|-------------|
| RHCE         | -1.900767258 | 0.06063638  | 1.281618496  | 0.205111969 | 0.71715257   | 0.476248184 |
| RHD          | -0.417871514 | 0.677068395 | -1.757388255 | 0.08416559  | -1.290285067 | 0.202231897 |
| RHEB         | -0.348219285 | 0.728514871 | -0.391179231 | 0.69710813  | -0.911410217 | 0.365969615 |
| RHEBL1       | -0.11931421  | 0.905300912 | -1.062669354 | 0.292367262 | -1.838338849 | 0.07129573  |
| RHOA         | -2.530966413 | 0.013169006 | 1.36312837   | 0.178147313 | 1.536368278  | 0.130055728 |
| RHOB         | -3.489008923 | 0.00076241  | -2.805099172 | 0.006847791 | -2.379882268 | 0.020733482 |
| RHOBTB1      | -4.210092742 | 6.19E-05    | 1.297008174  | 0.199800068 | -0.011078461 | 0.991200056 |
| RHOBTB2      | 1.84000047   | 0.06917072  | 0.344864358  | 0.731452523 | 0.862237223  | 0.392218976 |
| RHOBTB3      | 0.389639021  | 0.697753627 | -1.485055689 | 0.142981972 | -2.152788342 | 0.035639733 |
| RHOC         | 0.165699529  | 0.868777033 | -2.02575922  | 0.047430881 | -1.088509279 | 0.281013236 |
| RHOF         | 0.407852333  | 0.684381869 | -3.670114407 | 0.00053167  | -2.798202257 | 0.007025202 |
| RHOG         | -2.559156453 | 0.012217176 | -0.537917035 | 0.592706895 | -0.61698141  | 0.53973699  |
| RHOH         | -0.683437894 | 0.496142406 | 0.747773468  | 0.457639118 | 1.189382214  | 0.239286886 |
| RHOQ         | -0.415801021 | 0.678577237 | -1.844247226 | 0.070292206 | -2.065339227 | 0.04351137  |
| RHOT1        | 0.380326329  | 0.704628164 | -1.095279791 | 0.277953034 | -2.3892528   | 0.020260722 |
| RHOT2        | 0.261006068  | 0.794703335 | -0.571424301 | 0.569935287 | -0.288532377 | 0.774000099 |
| RHOU         | -1.137990094 | 0.258242072 | 0.314882046  | 0.753989147 | -0.177059145 | 0.860098091 |
| RHOXF1       | 0.687605994  | 0.493526071 | -1.076883493 | 0.286022247 | -0.462921365 | 0.645207137 |
| RHPN1        | -0.136151542 | 0.892015354 | 0.926901315  | 0.35784563  | 1.261592561  | 0.212303329 |
| RHPN2        | 0.940775636  | 0.349419074 | -0.687048592 | 0.494809252 | -0.476451781 | 0.635598589 |
| RIBC1        | -0.549129214 | 0.584320422 | -0.713746078 | 0.478266583 | -0.356805516 | 0.722572766 |
| RIC3         | 3.531497346  | 0.000662905 | 0.357505774  | 0.722019923 | 1.59678918   | 0.115917301 |
| RIC8A        | -0.901521417 | 0.36979478  | 2.050604472  | 0.044865303 | 1.902333705  | 0.062252993 |
| RIC8B        | 0.980954507  | 0.329329352 | -1.558416424 | 0.124612833 | -1.03498252  | 0.305107259 |
| RICTOR       | 0.181467551  | 0.856421803 | -1.156436749 | 0.252276699 | -2.808126061 | 0.006838495 |
| RIF1         | 0.459924787  | 0.646715072 | 0.182340662  | 0.855955658 | -1.284092295 | 0.20437482  |
| RILP         | -2.417168137 | 0.01772524  | -0.400165282 | 0.690515122 | -1.991779476 | 0.051259649 |
| RILPL1       | -0.558029396 | 0.578254418 | -1.818162405 | 0.074240676 | -0.237893912 | 0.81282801  |
| RILPL2       | -2.580690995 | 0.011532338 | 0.798977359  | 0.427586063 | -0.052494407 | 0.958320779 |
| RIMBP2       | 1.04985242   | 0.296687276 | 1.299778097  | 0.198855047 | 0.491691469  | 0.624851222 |
| RIMBP3       | -1.881619844 | 0.063224277 | 1.075486519  | 0.286641576 | 1.239350379  | 0.220363109 |
| RIMKLA       | -0.563631924 | 0.574451474 | 1.416999719  | 0.1618696   | 0.444587665  | 0.658324114 |
| RIMKLB       | 0.603650288  | 0.547643485 | -0.621669353 | 0.536612307 | -1.119687487 | 0.26760638  |
| RIMS3        | 3.262927247  | 0.001575403 | 0.600121232  | 0.55077939  | 1.642937658  | 0.105976213 |
| RIN1         | -0.433314651 | 0.665856341 | 0.932998708  | 0.354715456 | 0.264552402  | 0.792321481 |
| RIN2         | -0.567646094 | 0.571734118 | 1.516474687  | 0.134868987 | 0.486857015  | 0.628251871 |
| RIN3         | -1.10281663  | 0.273141516 | -0.539062408 | 0.591921473 | -0.561427268 | 0.576736856 |
| RING1        | -0.343610708 | 0.731966293 | -2.578299014 | 0.012508674 | -1.431908331 | 0.157704836 |
| RINL         | -1.150537343 | 0.253068365 | -0.491212379 | 0.625142846 | 0.047529102  | 0.962259927 |
| RINT1        | 1.979468888  | 0.050917999 | -0.732896874 | 0.466593701 | -0.278482859 | 0.781663152 |
| RIOK1        | 2.452133075  | 0.016194629 | 3.117015758  | 0.002849179 | 4.259926483  | 7.86E-05    |
| RIOK2        | 1.159445457  | 0.249440075 | 0.081725739  | 0.935148152 | 0.583520931  | 0.561875746 |
| RIOK3        | -1.195243642 | 0.235232783 | 2.294522225  | 0.025424907 | 1.886273017  | 0.064425674 |
| RIPK1        | -0.843993558 | 0.40098275  | 1.784209592  | 0.079657165 | 2.187183493  | 0.03290342  |
| RIPK2        | -2.45279265  | 0.016166927 | -1.259904965 | 0.212784795 | -2.616687822 | 0.011382462 |
| RIPK3        | -1.126360882 | 0.263103445 | 0.181227236  | 0.856825456 | 0.743074113  | 0.460529804 |
| RIPK4        | -1.972993507 | 0.051664148 | -0.420726773 | 0.675520324 | 1.328158311  | 0.189491072 |
| RIT1         | -2.445303428 | 0.016483971 | -0.186863321 | 0.852424458 | -1.242289314 | 0.219285398 |
| RLF          | -0.74948989  | 0.455579477 | -0.008400918 | 0.993326147 | -0.747142281 | 0.458090258 |
| RLIM         | 0.904717607  | 0.368108157 | -0.173473403 | 0.862887566 | -0.6997144   | 0.486990069 |
| RLN2         | 0.006166427  | 0.995094021 | -2.088889848 | 0.041147113 | -0.957678356 | 0.342324114 |
| RLTPR        | 0.286384138  | 0.775263313 | 0.678789133  | 0.49998997  | 1.654804457  | 0.103535327 |
| RMI1         | -1.391544735 | 0.167600507 | -0.820752125 | 0.415171565 | -1.912816039 | 0.060868772 |
| RMI2         | 0.153314495  | 0.878504549 | 0.516487978  | 0.607491086 | 0.170605517  | 0.865146286 |
| RMND1        | -0.928398691 | 0.355763894 | 1.860218919  | 0.067962961 | 1.860400992  | 0.06806065  |
| RMND5A       | -2.899066656 | 0.004734233 | -1.240996583 | 0.219637888 | -1.417260119 | 0.16192353  |
| RMND5B       | -0.250534877 | 0.802763168 | 1.998744384  | 0.050363185 | 1.99403323   | 0.051005697 |
| RMRP         | -2.36772553  | 0.020109579 | -1.599615576 | 0.115155558 | -1.350462702 | 0.182227728 |
| RNASE1       | -0.350597517 | 0.726735965 | 1.948466288  | 0.056236811 | 1.283177453  | 0.204692821 |
| RNASE2       | -0.371411054 | 0.711232416 | -2.306058634 | 0.024726989 | -2.571928457 | 0.012782296 |
| RNASE3       | 0.293213576  | 0.770055661 | -0.592526199 | 0.555817492 | -1.437802062 | 0.156031754 |
| RNASE4       | -2.44521019  | 0.016487953 | 2.324203346  | 0.023663712 | 2.010608977  | 0.049170977 |
| RNASE6       | -2.16031084  | 0.033492173 | -0.117558661 | 0.90682636  | 0.986419084  | 0.32815262  |
| RNASEH1      | 1.068132632  | 0.28840916  | 0.964283209  | 0.33893526  | 1.718723559  | 0.091165748 |
| RNASEH2A     | -0.354185631 | 0.724054911 | 3.189689935  | 0.002305111 | 3.949486776  | 0.000220519 |
| RNASEH2B     | 0.240199784  | 0.810739232 | -1.306067882 | 0.196721605 | -0.663112126 | 0.509967779 |
| RNASEH2C     | 1.165749365  | 0.246894928 | 0.105278214  | 0.916520836 | 0.846201122  | 0.401026963 |
| RNASEK       | -2.610459992 | 0.010642681 | -3.295662221 | 0.001684115 | -2.876615412 | 0.005669707 |
| RNASEK-C17OR | -0.656992514 | 0.512916239 | -2.561092638 | 0.013077152 | -3.228983375 | 0.002075716 |
| RNASEL       | -1.433800114 | 0.15520593  | 0.645684497  | 0.521047871 | -1.074483162 | 0.287194824 |
| RNASET2      | -1.478450108 | 0.142891022 | -2.019801827 | 0.048064548 | -1.635959515 | 0.107433374 |
| RNF10        | -3.410428129 | 0.000984651 | 1.70907539   | 0.092820679 | 1.659259883  | 0.102630817 |



|          |              |             |              |             |              |             |
|----------|--------------|-------------|--------------|-------------|--------------|-------------|
| RNF103   | 0.456591348  | 0.649100237 | -2.128458335 | 0.037588704 | -2.452344709 | 0.01732137  |
| RNF11    | -3.640164688 | 0.000461328 | -0.68162156  | 0.498210018 | -1.578245243 | 0.120118298 |
| RNF111   | -0.194177417 | 0.84648867  | -2.067620258 | 0.043178291 | -3.50493802  | 0.000904141 |
| RNF112   | 0.313651837  | 0.754534644 | 0.106619622  | 0.91546125  | 0.043449483  | 0.965497142 |
| RNF113A  | 0.291872055  | 0.771077786 | 1.597541022  | 0.115617515 | 1.163319225  | 0.249612341 |
| RNF114   | -2.616659292 | 0.010465413 | 0.254400076  | 0.800092052 | -0.28972673  | 0.773090855 |
| RNF115   | -1.068000601 | 0.288468377 | -2.401253962 | 0.019588394 | -1.751445842 | 0.08532137  |
| RNF121   | -0.167257371 | 0.867554862 | -0.306387463 | 0.760414494 | -0.480489007 | 0.632743637 |
| RNF122   | -1.288337547 | 0.201036919 | -0.393551287 | 0.69536546  | 0.909948352  | 0.366733389 |
| RNF123   | -1.29181974  | 0.199833411 | 0.409238791  | 0.683882307 | -0.055667708 | 0.955803831 |
| RNF125   | 0.299989597  | 0.764899143 | -0.759033934 | 0.450927489 | 0.40370658   | 0.687959521 |
| RNF126   | 1.219670961  | 0.225878681 | -3.206641979 | 0.002193073 | -2.101230231 | 0.040114451 |
| RNF13    | -1.352745478 | 0.179634625 | -0.273747856 | 0.785257716 | -1.407212519 | 0.164867462 |
| RNF130   | -3.630012161 | 0.00047736  | -0.520009864 | 0.605049715 | -1.20019453  | 0.235095351 |
| RNF135   | -1.951153006 | 0.054249797 | 1.06146827   | 0.292907823 | 1.304956965  | 0.197222073 |
| RNF138   | 0.491036195  | 0.62463456  | -0.481696436 | 0.631846867 | -1.038003283 | 0.303711108 |
| RNF138P1 | -0.07469777  | 0.9406263   | 0.69058602   | 0.49259945  | 0.532861194  | 0.596229137 |
| RNF139   | -0.745994751 | 0.457677198 | -1.731782884 | 0.088665391 | -2.285476228 | 0.026075772 |
| RNF14    | -0.119416959 | 0.905219751 | 1.887350905  | 0.064155505 | 1.511720743  | 0.136204329 |
| RNF141   | -3.260206047 | 0.001588921 | -1.592110224 | 0.116833914 | -1.392861611 | 0.169143794 |
| RNF144A  | 0.86391261   | 0.390006347 | -0.692664003 | 0.491303886 | -1.297533905 | 0.19974495  |
| RNF144B  | 0.40633784   | 0.685490015 | 0.424067216  | 0.673096484 | -0.661403725 | 0.511054315 |
| RNF145   | -1.0790183   | 0.28355558  | -0.168325135 | 0.866917196 | -0.403646631 | 0.688003357 |
| RNF146   | 1.395120769  | 0.166523112 | -1.256466097 | 0.214019239 | -2.657080714 | 0.010240676 |
| RNF149   | -1.546863238 | 0.125518425 | 0.386891295  | 0.700262491 | -0.848175889 | 0.399935761 |
| RNF157   | 4.436027272  | 2.66E-05    | 2.458279958  | 0.016989819 | 3.255559654  | 0.00191916  |
| RNF165   | 0.250389269  | 0.802875398 | -2.282225404 | 0.026188032 | -1.266522791 | 0.210546765 |
| RNF166   | -1.914495326 | 0.058836397 | -2.973517005 | 0.004293715 | -2.671894063 | 0.009848883 |
| RNF167   | -1.795780472 | 0.075993601 | -2.780903441 | 0.007312992 | -2.21885332  | 0.030549011 |
| RNF168   | 0.785073894  | 0.434538319 | 2.829721684  | 0.006402524 | 4.166380308  | 0.000107651 |
| RNF169   | -0.782313546 | 0.436149837 | -0.362469225 | 0.718328092 | -0.716128441 | 0.476875339 |
| RNF17    | -0.915907496 | 0.362241742 | 0.187151342  | 0.852199679 | 0.653907704  | 0.515836395 |
| RNF170   | 3.298344289  | 0.001409014 | -1.329988315 | 0.188764985 | -0.672548464 | 0.503988734 |
| RNF175   | 1.159051507  | 0.249599746 | 0.125243173  | 0.900767166 | -0.325233738 | 0.746211105 |
| RNF181   | -1.357643876 | 0.178080225 | 0.462731233  | 0.64530055  | 0.678277828  | 0.500377114 |
| RNF182   | -1.530818343 | 0.129434642 | 0.66131596   | 0.511046609 | 1.101269091  | 0.275470838 |
| RNF185   | -2.70638602  | 0.008182286 | 0.778959412  | 0.4391924   | 1.116363908  | 0.269013673 |
| RNF187   | -1.974086787 | 0.051537522 | 0.848638793  | 0.399595615 | 0.931642251  | 0.355503913 |
| RNF19A   | 0.546707392  | 0.585976237 | -1.13768796  | 0.259961427 | -2.276933641 | 0.026614836 |
| RNF19B   | -3.918862283 | 0.000176545 | -0.599162414 | 0.55141414  | -1.625377374 | 0.109673967 |
| RNF2     | -0.087641988 | 0.930362208 | -1.475754562 | 0.145456056 | -2.107567381 | 0.039539281 |
| RNF20    | -0.756031397 | 0.451668209 | 2.775279138  | 0.007425216 | 2.255722741  | 0.027996264 |
| RNF207   | 0.411575211  | 0.681660802 | -1.272744755 | 0.208222342 | -0.742834724 | 0.46067359  |
| RNF208   | -2.705503092 | 0.008202348 | 0.050068308  | 0.960241184 | 0.302228595  | 0.763592775 |
| RNF212   | 1.491551185  | 0.139426221 | -0.607642914 | 0.545812773 | -0.619895267 | 0.537830495 |
| RNF213   | -0.752280646 | 0.453908474 | 0.031237078  | 0.975188464 | -0.992422895 | 0.325242299 |
| RNF214   | 1.984891335  | 0.050300259 | -1.304674336 | 0.197192795 | -0.476493325 | 0.635569182 |
| RNF215   | 0.110958728  | 0.9119041   | 0.100939176  | 0.919949301 | -0.442284421 | 0.659979759 |
| RNF216   | 1.50054848   | 0.137085085 | 1.883913143  | 0.064627707 | 2.614176205  | 0.011457153 |
| RNF216L  | 1.244663921  | 0.216590588 | 0.185764043  | 0.853282476 | 1.874940241  | 0.065997153 |
| RNF217   | -0.271750245 | 0.786456498 | -1.009538806 | 0.316938702 | -2.216882725 | 0.030691054 |
| RNF219   | 1.022458532  | 0.309392512 | 0.58340611   | 0.561897574 | 0.911025153  | 0.366170699 |
| RNF220   | 0.214352407  | 0.830772778 | 0.261161325  | 0.794899682 | 1.113345471  | 0.270296273 |
| RNF222   | 0.523164609  | 0.602186782 | -2.794719703 | 0.007043907 | -1.473690282 | 0.146140845 |
| RNF24    | -0.586997794 | 0.558722131 | -0.548143078 | 0.585711969 | -1.462373559 | 0.149205158 |
| RNF25    | -0.786065196 | 0.433960441 | 0.252689809  | 0.801407575 | 1.757687074  | 0.084242733 |
| RNF26    | -0.042838162 | 0.965928495 | 0.153215303  | 0.878764019 | 1.354498901  | 0.18099451  |
| RNF31    | -1.073148493 | 0.28616571  | 0.91599602   | 0.363488338 | -0.12125737  | 0.903919414 |
| RNF32    | 0.668965289  | 0.505285072 | -1.454545443 | 0.151223396 | -1.365712785 | 0.177466686 |
| RNF34    | 0.475795154  | 0.635410312 | -0.125656587 | 0.900441356 | 0.297131869  | 0.767460609 |
| RNF38    | -0.294069895 | 0.76940343  | -0.892215593 | 0.375989867 | -1.370368147 | 0.176017674 |
| RNF39    | 0.949547301  | 0.344966963 | 0.259184213  | 0.796417226 | 1.316595106  | 0.193314944 |
| RNF4     | -1.681376142 | 0.096268766 | 0.013732109  | 0.989091163 | 0.642423364  | 0.523208805 |
| RNF40    | -1.163842968 | 0.247662659 | 0.971792475  | 0.335217361 | 0.876636322  | 0.384413632 |
| RNF41    | -1.55971411  | 0.122450041 | -1.738446891 | 0.08747554  | -1.414264405 | 0.162796976 |
| RNF43    | 2.471575699  | 0.015395632 | -0.188332152 | 0.851278274 | 0.998318239  | 0.322401384 |
| RNF44    | 0.405630973  | 0.686007461 | -2.006304758 | 0.049527238 | -1.660077212 | 0.102465592 |
| RNF5P1   | -1.033602999 | 0.304180249 | 1.765090526  | 0.082849715 | 0.882607847  | 0.381205455 |
| RNF6     | 0.370413665  | 0.711972645 | -0.563437512 | 0.575324112 | -1.153046892 | 0.25376859  |
| RNF7     | -0.90880302  | 0.365959398 | -1.968660748 | 0.053810757 | -1.648687144 | 0.104787809 |
| RNF8     | 0.050994559  | 0.959446503 | 2.276587797  | 0.026544637 | 3.139763004  | 0.00269377  |
| RNFT1    | 1.120053865  | 0.265766688 | -2.906866751 | 0.005174759 | -2.766832761 | 0.007646733 |

|           |              |             |              |             |              |             |
|-----------|--------------|-------------|--------------|-------------|--------------|-------------|
| RNFT2     | 0.391986774  | 0.696024486 | 1.06253511   | 0.292427646 | 1.85112481   | 0.069405445 |
| RNGTT     | 0.991143727  | 0.324358103 | 0.390067691  | 0.697925305 | 0.101922851  | 0.919180461 |
| RNH1      | -0.91842234  | 0.360931553 | 2.829126781  | 0.006412959 | 3.10856058   | 0.002947984 |
| RNLS      | -0.278618261 | 0.781197533 | -2.358943949 | 0.021740911 | -0.327067764 | 0.744830951 |
| RNMT      | 1.914831502  | 0.058792891 | 0.497063661  | 0.62103629  | 1.470722019  | 0.146939759 |
| RNMTL1    | 0.428692475  | 0.669204326 | 2.694609344  | 0.009219053 | 3.373865856  | 0.001347904 |
| RNPC3     | 1.524444877  | 0.124178298 | -0.577206076 | 0.566049698 | -2.167532624 | 0.034443232 |
| RNPEP     | -1.423517268 | 0.158154978 | 2.080772881  | 0.041912245 | 1.702148912  | 0.094249924 |
| RNPEPL1   | -0.944857119 | 0.347342896 | 1.021978395  | 0.311064567 | 2.154932249  | 0.035463523 |
| RNPS1     | -0.738342988 | 0.462288852 | 0.671346836  | 0.50468331  | 1.054189498  | 0.296304405 |
| ROBO1     | 1.244332367  | 0.216711945 | 0.983985224  | 0.329238268 | 0.825620214  | 0.412508354 |
| ROBO3     | 1.239555209  | 0.218466034 | 1.91008771   | 0.061105486 | 2.127352659  | 0.037789545 |
| ROCK1     | 0.341423794  | 0.733606039 | 0.237110797  | 0.813412182 | -1.325213785 | 0.190459333 |
| ROCK2     | -1.860784194 | 0.066145214 | -0.403078031 | 0.688383187 | -2.264081143 | 0.027444493 |
| ROD1      | -0.661905344 | 0.509777543 | -1.404443415 | 0.165556739 | -2.043040233 | 0.045745269 |
| ROGDI     | -2.501859559 | 0.014221284 | -0.378106279 | 0.706741612 | -1.339566678 | 0.185774771 |
| ROM1      | 1.623890188  | 0.108009316 | 0.051269259  | 0.959288358 | -1.364275698 | 0.177915826 |
| ROMO1     | -0.064378647 | 0.948816107 | -0.479900891 | 0.63311535  | -0.282206152 | 0.778821448 |
| ROPN1L    | -1.523618088 | 0.131223163 | -0.150018637 | 0.881274025 | 0.102560555  | 0.918676591 |
| ROR2      | -0.676529855 | 0.500495137 | 0.993664645  | 0.324542462 | 1.147873945  | 0.255880226 |
| RORA      | 1.351480696  | 0.180037637 | -2.345212754 | 0.022483572 | -5.230405418 | 0.014218929 |
| RORC      | -0.714181073 | 0.477022861 | -1.075947416 | 0.286437141 | -0.521435635 | 0.604110865 |
| RP1L1     | -3.354824917 | 0.001177359 | 0.81026641   | 0.421122319 | 1.717886959  | 0.091319399 |
| RP2       | -1.092491618 | 0.277626575 | -0.988042661 | 0.327264398 | -2.601458823 | 0.011842245 |
| RP9       | 0.173634737  | 0.862555027 | 0.679596861  | 0.499482026 | 1.150465263  | 0.254820868 |
| RP9P      | -0.081279208 | 0.935406198 | -0.934112784 | 0.354145454 | -0.084089084 | 0.93328423  |
| RPA1      | -0.236082268 | 0.813922535 | 2.1902604    | 0.032568032 | 2.246164829  | 0.028639233 |
| RPA2      | -1.346656553 | 0.181581087 | 0.290468038  | 0.772501501 | 1.598355424  | 0.115567977 |
| RPA3      | -0.052310718 | 0.958400778 | -0.46221251  | 0.645670232 | -0.014281576 | 0.988655885 |
| RPAIN     | 2.636124352  | 0.009926043 | -0.625257145 | 0.53427186  | -0.522412392 | 0.603435191 |
| RPAP1     | 1.054359682  | 0.294631314 | 1.390419027  | 0.169751278 | 2.419982934  | 0.018777362 |
| RPAP2     | 1.112050937  | 0.269173161 | 0.067683597  | 0.946271923 | 0.591837476  | 0.556331326 |
| RPAP3     | 0.690620649  | 0.491638452 | 0.53140738   | 0.597180076 | -0.241483696 | 0.810058602 |
| RPE       | 0.526766275  | 0.599693544 | -0.641718914 | 0.523601467 | -0.814818639 | 0.418613452 |
| RPF1      | 0.430426506  | 0.667947525 | -2.0571208   | 0.044212624 | -1.111924274 | 0.27090166  |
| RPF2      | 0.782168467  | 0.436234632 | -0.04288452  | 0.965941913 | 0.303060307  | 0.762962172 |
| RPGR      | -0.682278922 | 0.496871233 | -1.688120526 | 0.096796317 | -3.067245864 | 0.003319255 |
| RPGRIP1   | 0.683861473  | 0.49587618  | 0.14475035   | 0.885413317 | 0.430989039  | 0.668123879 |
| RPGRIP1L  | 0.935184447  | 0.352276195 | -1.64131994  | 0.106181026 | -1.197685333 | 0.236063286 |
| RPH3A     | -2.188701162 | 0.031291542 | -0.074631305 | 0.94076667  | -0.086814162 | 0.931127606 |
| RPH3AL    | -1.399019593 | 0.16535451  | 1.599232293  | 0.115240794 | 2.444617389  | 0.017659479 |
| RPIA      | -1.87871893  | 0.06362434  | 2.029070827  | 0.047081763 | 1.721451461  | 0.090666218 |
| RPL10     | 0.331736844  | 0.74088408  | -1.598877781 | 0.115319677 | -0.382140027 | 0.703797824 |
| RPL10A    | 0.740437626  | 0.461023815 | -0.067824838 | 0.946159978 | 0.687536713  | 0.494570508 |
| RPL11     | 0.170799504  | 0.864777162 | 0.494412905  | 0.622895157 | 1.091853966  | 0.279552962 |
| RPL12     | 0.023357039  | 0.981418846 | -0.45486207  | 0.650918342 | 0.217801682  | 0.828371995 |
| RPL13     | 1.04983954   | 0.296693165 | -1.360013911 | 0.17912531  | -0.115945437 | 0.908108827 |
| RPL13A    | 0.662335559  | 0.509503176 | 1.292873156  | 0.201217078 | 1.54895559   | 0.12700212  |
| RPL13P5   | -1.173139379 | 0.243934904 | 2.393238334  | 0.0199809   | 1.343892505  | 0.184380181 |
| RPL14     | -0.471792231 | 0.638253665 | -1.22688651  | 0.224856852 | -0.230055468 | 0.818883444 |
| RPL15     | 0.593465287  | 0.554406276 | -0.929854317 | 0.356327448 | -0.227252499 | 0.821051538 |
| RPL17     | 0.666938503  | 0.506572608 | 0.205842302  | 0.837639941 | 1.043669125  | 0.301104213 |
| RPL18     | -0.107558978 | 0.914592661 | 1.979838199  | 0.052506911 | 1.880396353  | 0.065236568 |
| RPL18A    | -0.564909512 | 0.573585948 | -1.350779946 | 0.182049026 | -0.424001077 | 0.673182534 |
| RPL19     | 0.106808132  | 0.915186574 | 0.5749803    | 0.567543965 | 1.700469225  | 0.094567215 |
| RPL21     | -0.653496028 | 0.515156288 | 3.409501817  | 0.001194554 | 3.664049031  | 0.000550958 |
| RPL21P44  | -0.209780871 | 0.834328121 | -0.755453977 | 0.453055046 | 0.370973523  | 0.712051099 |
| RPL22     | 0.239542449  | 0.811247213 | -0.174172987 | 0.862340271 | 0.750125478  | 0.456306073 |
| RPL22L1   | 0.778878473  | 0.438160152 | -0.998270287 | 0.3223239   | -0.242155042 | 0.809540949 |
| RPL23     | 0.850511196  | 0.397370596 | 0.460694018  | 0.646752942 | 1.046161523  | 0.299962303 |
| RPL23A    | -0.191164581 | 0.848841109 | -0.073729974 | 0.941480712 | 0.474759469  | 0.636796978 |
| RPL23AP53 | 0.515793172  | 0.607304386 | 1.167566176  | 0.247792567 | 0.657623045  | 0.51346322  |
| RPL23AP64 | 1.922936202  | 0.057752219 | 0.890359975  | 0.376976709 | 1.298389573  | 0.199452905 |
| RPL23AP7  | -3.785410076 | 0.000281164 | 1.264088487  | 0.211290167 | 0.068980316  | 0.94524998  |
| RPL23AP82 | -0.666949316 | 0.506565734 | 3.496288907  | 0.000915489 | 2.472687473  | 0.016458971 |
| RPL24     | 0.523082501  | 0.602243677 | -0.590676856 | 0.557047724 | 0.286330707  | 0.775677033 |
| RPL26     | 0.727839913  | 0.46866171  | -0.367058553 | 0.714920527 | 0.213818395  | 0.831462018 |
| RPL26L1   | 0.521051841  | 0.603651545 | -1.293717462 | 0.200927137 | -0.33580619  | 0.738266669 |
| RPL27     | 0.027765363  | 0.977912746 | -2.628402325 | 0.010978894 | -1.56895407  | 0.12226872  |
| RPL27A    | 0.366625176  | 0.714786849 | -0.869093384 | 0.388403326 | 0.367395962  | 0.714702711 |
| RPL28     | -1.845789025 | 0.068316675 | -1.180603614 | 0.242612844 | -0.95727443  | 0.342526106 |
| RPL29     | -0.682996728 | 0.496419768 | -2.79331532  | 0.007070836 | -1.506724582 | 0.137478333 |

|           |              |             |              |             |              |             |
|-----------|--------------|-------------|--------------|-------------|--------------|-------------|
| RPL3      | 0.809463076  | 0.420452411 | 0.382287653  | 0.703655012 | 1.147381287  | 0.256081985 |
| RPL30     | 0.106496854  | 0.915432806 | -1.177815693 | 0.243713855 | -0.445270866 | 0.657833337 |
| RPL31     | 0.633486544  | 0.528074249 | -0.78140777  | 0.437762959 | -0.006309654 | 0.994987987 |
| RPL31P11  | -1.030472282 | 0.305638457 | -1.260397428 | 0.212608449 | -2.079626601 | 0.042130333 |
| RPL32     | 0.089204497  | 0.929123981 | -1.357938321 | 0.179779355 | 0.064135404  | 0.949089845 |
| RPL32P3   | 0.536021298  | 0.5933087   | -0.67755711  | 0.500765277 | -0.193157343 | 0.847531669 |
| RPL34     | 0.790719573  | 0.431253231 | -0.071246524 | 0.94344837  | 0.885169009  | 0.379834668 |
| RPL35     | 0.579812216  | 0.563536565 | -0.822609993 | 0.414122547 | 0.187120901  | 0.8522393   |
| RPL35A    | 0.093882677  | 0.925417765 | -1.935358838 | 0.05786099  | -0.56631697  | 0.57343149  |
| RPL36     | -0.140747855 | 0.888393804 | -1.904508971 | 0.061842204 | -0.582378909 | 0.562639238 |
| RPL36A    | 0.645951382  | 0.520007372 | 0.120301717  | 0.904662818 | 0.511482346  | 0.61101588  |
| RPL36AL   | -0.83439179  | 0.406340572 | -0.660579906 | 0.511515229 | -0.622197882 | 0.536326387 |
| RPL37     | 0.825327163  | 0.411438355 | -1.965692134 | 0.054161672 | -0.900197275 | 0.371854062 |
| RPL37A    | -0.063373545 | 0.949614118 | -0.028241918 | 0.977566835 | 0.579920111  | 0.564284796 |
| RPL38     | -1.354868407 | 0.178959705 | -2.992359207 | 0.004071213 | -1.606906923 | 0.113675675 |
| RPL39     | 0.076069293  | 0.939538248 | -0.351888895 | 0.726205798 | 0.604061479  | 0.548231957 |
| RPL39L    | 0.598252614  | 0.551222342 | -0.782730883 | 0.436991622 | -0.686488524 | 0.495226006 |
| RPL3L     | -0.088315273 | 0.929828635 | 0.694826209  | 0.489957808 | -0.480038689 | 0.633061805 |
| RPL4      | 0.630808762  | 0.529815658 | 0.662572091  | 0.510247406 | 1.456007613  | 0.150950915 |
| RPL41     | 0.45673603   | 0.648996637 | -0.199752019 | 0.842378099 | 0.536906958  | 0.593449812 |
| RPL5      | 0.454510515  | 0.65059099  | -0.561738018 | 0.576473971 | 0.421196424  | 0.675217145 |
| RPL6      | 0.642533871  | 0.522212635 | 0.616336597  | 0.54010081  | 1.311599517  | 0.194984842 |
| RPL7      | 0.414800734  | 0.679306652 | 0.5638048    | 0.575075756 | 0.746658495  | 0.458379977 |
| RPL7A     | 0.367188503  | 0.714368142 | 0.023478328  | 0.981349878 | 0.717053114  | 0.476309069 |
| RPL7L1    | 1.35294344   | 0.179571608 | 0.210154353  | 0.834288862 | 0.482081902  | 0.631618752 |
| RPL8      | 0.104916106  | 0.916683363 | -2.704935598 | 0.00896912  | -1.017619861 | 0.313216728 |
| RPL9      | 0.29108975   | 0.771674024 | 0.576719239  | 0.566376369 | 1.01457511   | 0.314653704 |
| RPLP0     | -0.179944335 | 0.857613828 | -0.398117326 | 0.692015598 | 0.001225251  | 0.999026727 |
| RPLPOP2   | 1.823230068  | 0.071695528 | 1.628049509  | 0.108972902 | 0.594178311  | 0.55477571  |
| RPLP1     | -0.787526552 | 0.433109372 | 0.361364138  | 0.719149479 | 0.726155515  | 0.470754985 |
| RPLP2     | -0.349825778 | 0.727313058 | 0.438909674  | 0.662369118 | 0.866897488  | 0.38968204  |
| RPN1      | -1.810165896 | 0.073715178 | 1.780600798  | 0.08025179  | 2.608351099  | 0.011632103 |
| RPN2      | -0.572983497 | 0.568130671 | 2.742474512  | 0.008111967 | 2.786551496  | 0.007250394 |
| RPP14     | -1.614325556 | 0.110070276 | 1.769489929  | 0.082105817 | 2.306087309  | 0.024814853 |
| RPP21     | -0.36458077  | 0.716307139 | -2.902743258 | 0.00523443  | -3.327502803 | 0.001549354 |
| RPP25     | 0.056769231  | 0.954858921 | 0.268829777  | 0.789021299 | -1.230029332 | 0.223806944 |
| RPP30     | 1.855239911  | 0.066941249 | -1.859786586 | 0.068025143 | -0.059559808 | 0.952717379 |
| RPP38     | 1.128985318  | 0.262000773 | -1.713547937 | 0.091989784 | -0.681213862 | 0.498531802 |
| RPP40     | 0.36002569   | 0.71969856  | -1.534253262 | 0.130442549 | -0.222512706 | 0.824720951 |
| RPPH1     | -3.246744964 | 0.001657401 | 2.776047048  | 0.007409801 | 2.662430656  | 0.010097563 |
| RPRD1A    | 1.169497372  | 0.245390503 | -2.205401936 | 0.031431712 | -1.943979577 | 0.056907227 |
| RPRD1B    | -0.372185762 | 0.710657644 | -1.502280261 | 0.138487899 | -0.758435363 | 0.451357324 |
| RPRD2     | -0.766368093 | 0.445527293 | 0.290623772  | 0.772382978 | 0.497249919  | 0.620951415 |
| RPRM      | 0.881196771  | 0.380634047 | 0.301456871  | 0.764151848 | -0.671351263 | 0.504745195 |
| RPS10     | 0.16853088   | 0.866555997 | 0.839498184  | 0.404660883 | 1.512266428  | 0.136065749 |
| RPS10P7   | -0.100084957 | 0.920506654 | -0.738098827 | 0.463451224 | 0.883881802  | 0.380523218 |
| RPS11     | -0.613015849 | 0.541461635 | -0.765453092 | 0.447127174 | -0.00815165  | 0.993524845 |
| RPS12     | -1.020072068 | 0.310516419 | 0.530497122  | 0.597806824 | 1.510113721  | 0.136613089 |
| RPS13     | 0.464957091  | 0.643121313 | -2.057569081 | 0.044168028 | -0.586355123 | 0.559983188 |
| RPS14     | 0.771726744  | 0.442362922 | 0.264790137  | 0.792116442 | 1.025728787  | 0.309411375 |
| RPS15     | 0.785431253  | 0.434329945 | -0.117501984 | 0.906871071 | 0.661788457  | 0.510809518 |
| RPS15A    | -0.07362602  | 0.941476616 | -0.787581124 | 0.434170948 | -0.03814024  | 0.96971094  |
| RPS15AP10 | -0.951944562 | 0.34375665  | -1.550307425 | 0.126545556 | -2.141083855 | 0.03661532  |
| RPS16     | -0.105842841 | 0.915950181 | -0.026627302 | 0.978849041 | 0.668987083  | 0.506240822 |
| RPS18     | 0.595831576  | 0.552831372 | -1.264771707 | 0.211046818 | -0.076493057 | 0.939298326 |
| RPS19     | -0.181728669 | 0.856217493 | 0.845020519  | 0.401595985 | 1.347888146  | 0.183099122 |
| RPS19BP1  | 0.091463542  | 0.927334087 | 1.297785805  | 0.199534423 | 1.401811649  | 0.166466919 |
| RPS2      | 1.630812687  | 0.106537149 | -1.342880359 | 0.184578953 | -0.54463909  | 0.58815507  |
| RPS20     | 0.260022693  | 0.79545932  | 0.730373767  | 0.46812226  | 1.407791732  | 0.164696637 |
| RPS21     | 0.487664389  | 0.627011587 | -1.774324982 | 0.081294674 | -0.546189816 | 0.587095883 |
| RPS23     | 0.511482018  | 0.61030652  | -0.59323469  | 0.555346546 | 0.079236761  | 0.937125591 |
| RPS24     | 0.760019739  | 0.449293029 | 0.333912434  | 0.739658358 | 1.234521123  | 0.222142465 |
| RPS25     | 0.351716407  | 0.725899558 | -1.818641056 | 0.074166581 | -0.672577483 | 0.503970406 |
| RPS26     | -0.036032162 | 0.971339082 | -3.400075026 | 0.001229314 | -2.397359826 | 0.019859525 |
| RPS27     | 0.363077532  | 0.717425729 | -1.291546752 | 0.201673207 | -0.797253241 | 0.428657317 |
| RPS27A    | 0.858457443  | 0.39299379  | 0.715122048  | 0.477422469 | 1.617360346  | 0.111396629 |
| RPS27L    | 1.444012764  | 0.152319233 | -1.733822909 | 0.088299733 | -1.255442645 | 0.214509656 |
| RPS28     | 0.728922919  | 0.468002306 | -1.711765339 | 0.092320211 | -1.146653784 | 0.256380127 |
| RPS29     | -0.123241013 | 0.9021999   | -2.259937472 | 0.027623099 | -1.363350555 | 0.178205425 |
| RPS2P32   | 0.036515735  | 0.970954607 | -1.486855944 | 0.142506957 | -0.076924054 | 0.938956989 |
| RPS3      | 0.213058972  | 0.831778345 | 0.936077742  | 0.353141557 | 1.25910599   | 0.213193369 |
| RPS3A     | 0.334730915  | 0.738632006 | 0.513189903  | 0.609781392 | 0.945768684  | 0.348312635 |

|               |              |             |              |             |              |             |
|---------------|--------------|-------------|--------------|-------------|--------------|-------------|
| RPS4X         | 0.3565104    | 0.722319667 | 1.308571102  | 0.195877336 | 1.999421446  | 0.050402936 |
| RPS5          | 0.39600801   | 0.693066548 | -0.654459929 | 0.515420503 | 0.247543866  | 0.80538892  |
| RPS6          | 0.664155336  | 0.508343496 | -0.121811416 | 0.903472375 | 1.138333663  | 0.259807457 |
| RPS6KA1       | -2.153849766 | 0.034011409 | 0.931676351  | 0.355392794 | 0.788286781  | 0.433839349 |
| RPS6KA2       | 2.932320355  | 0.004296733 | 0.62111796   | 0.536972469 | 0.81576942   | 0.418073884 |
| RPS6KA3       | 1.349246643  | 0.180751169 | -1.407701929 | 0.164593706 | -2.551426754 | 0.013474279 |
| RPS6KA4       | -0.168762268 | 0.866374534 | -1.764322227 | 0.0829802   | -1.9848588   | 0.052046271 |
| RPS6KA5       | -0.722496553 | 0.471922744 | -0.314026752 | 0.754635313 | -2.860858235 | 0.005920934 |
| RPS6KB1       | 0.098722688  | 0.921585072 | -1.133309167 | 0.261779912 | -1.547944279 | 0.127245322 |
| RPS6KB2       | -1.034439115 | 0.303791604 | -1.118973849 | 0.267796319 | -0.297109521 | 0.767477582 |
| RPS6KC1       | -0.581883951 | 0.56214639  | 0.511710975  | 0.610809693 | -0.18745442  | 0.851979056 |
| RPS6KL1       | 1.284807436  | 0.202262471 | -1.319465781 | 0.19223457  | 0.31698086   | 0.75243191  |
| RPS7          | 0.230239822  | 0.818444761 | -0.599188338 | 0.551396974 | -0.09226881  | 0.926812377 |
| RPS8          | 0.806391756  | 0.422211087 | 0.105504053  | 0.916342434 | 0.989932602  | 0.326447359 |
| RPS9          | 0.042524369  | 0.966177919 | -0.697473234 | 0.488312682 | -0.215183552 | 0.830402698 |
| RPSA          | -0.044937223 | 0.964260109 | 0.366519671  | 0.715320345 | 0.993075012  | 0.324927229 |
| RPSAP58       | 0.854473633  | 0.395184353 | 0.478536357  | 0.634080081 | -0.992682204 | 0.32511699  |
| RPTOR         | 0.174513843  | 0.861866245 | 0.817116061  | 0.417229272 | 1.331521057  | 0.188389848 |
| RPUSD1        | 0.437902315  | 0.662540038 | -0.039023507 | 0.969006597 | 0.644082703  | 0.522140164 |
| RPUSD2        | 0.688992844  | 0.492657209 | 2.221719503  | 0.030246344 | 3.098280964  | 0.003036543 |
| RPUSD3        | -0.326658844 | 0.744708799 | 1.812346818  | 0.0751459   | 2.338932381  | 0.002917339 |
| RPUSD4        | 2.284418266  | 0.024775408 | 2.488217247  | 0.015753736 | 3.362266749  | 0.001395839 |
| RQCD1         | 1.005030316  | 0.317663379 | -1.373062083 | 0.175055188 | -0.606214349 | 0.546811729 |
| RRAGA         | -1.199281478 | 0.233667594 | -0.669687041 | 0.505733269 | -0.947961811 | 0.347204762 |
| RRAGB         | 0.636592603  | 0.526058046 | -0.19771234  | 0.843966261 | -0.316524545 | 0.752776354 |
| RRAGC         | -0.865707283 | 0.389026599 | 0.125317378  | 0.900708685 | -0.419798472 | 0.676232188 |
| RRAGD         | -2.464548993 | 0.015680229 | 0.87854663   | 0.38329757  | -0.525504271 | 0.601298678 |
| RRAS          | -0.496401295 | 0.620860504 | -1.851637375 | 0.069206232 | -1.658200238 | 0.102845352 |
| RRAS2         | 1.662873026  | 0.099928794 | -2.086209472 | 0.04139842  | -1.471945617 | 0.146610011 |
| RRBP1         | 0.247079902  | 0.80542725  | 1.621035342  | 0.110472463 | 0.87774745   | 0.383815402 |
| RREB1         | 0.756465939  | 0.451409076 | 0.225116976  | 0.822685084 | -0.113330985 | 0.910171765 |
| RRM1          | 2.530215019  | 0.013195265 | 3.353936675  | 0.00141371  | 3.961636536  | 0.000211935 |
| RRM2          | 0.746826839  | 0.457177294 | 0.339753368  | 0.735278127 | 0.34277621   | 0.733044792 |
| RRM2B         | -1.063510889 | 0.290486985 | -0.855584243 | 0.395773083 | -2.296364304 | 0.02540276  |
| RRN3          | 1.99459227   | 0.049211038 | 2.237436082  | 0.029142077 | 2.138748006  | 0.036812789 |
| RRN3P1        | 1.745350041  | 0.084446971 | 0.003056455  | 0.997571867 | 1.097237665  | 0.277213606 |
| RRN3P2        | 1.047608129  | 0.297714629 | -1.464272228 | 0.148556591 | -1.026946101 | 0.308842833 |
| RRN3P3        | 2.541854734  | 0.012793728 | -2.078749961 | 0.042104844 | -0.822592965 | 0.41421388  |
| RRNAD1        | 0.854098193  | 0.395391181 | 0.547524849  | 0.586133738 | 0.459781897  | 0.647445413 |
| RRP1          | 0.929466745  | 0.355213478 | 2.307484917  | 0.024641897 | 0.045227812  | 0.003534553 |
| RRP12         | -0.855515104 | 0.394610959 | 0.677817857  | 0.500601135 | 1.195029557  | 0.237090915 |
| RRP15         | 2.517561412  | 0.013644607 | -0.645663106 | 0.521061627 | 0.139142705  | 0.88983448  |
| RRP1B         | 0.999416496  | 0.320358628 | 2.117083618  | 0.03858305  | 2.441187137  | 0.017811464 |
| RRP36         | -1.2163037   | 0.227151837 | 2.675735081  | 0.009692421 | 4.306400362  | 6.72E-05    |
| RRP7A         | 0.805382996  | 0.422789672 | 1.192204988  | 0.238069758 | 1.497394505  | 0.139882717 |
| RRP7B         | 3.359652099  | 0.001159317 | -0.80610356  | 0.423498956 | -0.653041629 | 0.516390439 |
| RRP8          | -0.483157161 | 0.630195213 | 2.335052016  | 0.023047605 | 3.085430721  | 0.003150751 |
| RRP9          | -0.015511466 | 0.987659577 | 1.345148441  | 0.183849858 | 2.419517159  | 0.018799097 |
| RRS1          | 0.727823845  | 0.468671498 | 0.317784635  | 0.751797588 | 0.008088514  | 0.993574995 |
| RSAD1         | 1.430435943  | 0.15616604  | 1.669781168  | 0.100389428 | 2.671446429  | 0.009860519 |
| RSAD2         | -1.904513187 | 0.060140678 | 0.839544795  | 0.404634954 | -2.126502696 | 0.037863299 |
| RSBN1         | 1.389804673  | 0.168126679 | -0.508940766 | 0.612737942 | -1.206735174 | 0.232585835 |
| RSBN1L        | -1.379939385 | 0.171133693 | -1.973531841 | 0.053239174 | -3.690746557 | 0.000506464 |
| RSC1A1        | -1.027671048 | 0.306947192 | -1.979318818 | 0.052566891 | -1.968134238 | 0.053990141 |
| RSF1          | 0.216580723  | 0.829041059 | 1.00957779   | 0.316920177 | 0.470483309  | 0.639829431 |
| RSG1          | 0.127622195  | 0.898741856 | 0.492854005  | 0.623989504 | 0.079585007  | 0.93684985  |
| RSL1D1        | 0.866799719  | 0.388430963 | 2.66457295   | 0.009982727 | 4.039024669  | 0.000164362 |
| RSL24D1       | 0.4147037    | 0.679377426 | -0.085991497 | 0.931771413 | -0.043719376 | 0.96528296  |
| RSPH3         | -0.829663044 | 0.408995132 | -0.293796948 | 0.769969186 | -0.511555851 | 0.610964755 |
| RSPH4A        | 0.243586275  | 0.808123475 | -0.714435588 | 0.477843486 | 0.096388272  | 0.923554884 |
| RSPH9         | -1.764059733 | 0.081224576 | 1.941536334  | 0.057090601 | -1.247608825 | 0.21734462  |
| RSP04         | -0.104304959 | 0.917166908 | 0.672023201  | 0.504255791 | 0.190174359  | 0.849857317 |
| RSPRY1        | -0.090972232 | 0.927723332 | 0.41932326   | 0.676539752 | -0.171276644 | 0.864621046 |
| RSRC1         | -0.714342431 | 0.476923605 | -0.526783261 | 0.600367132 | -0.436764386 | 0.663954686 |
| RSRC2         | 0.853462166  | 0.395741717 | 0.044952511  | 0.964300652 | 0.353551607  | 0.724996949 |
| RSU1          | -1.683809877 | 0.095795582 | -1.699660901 | 0.094589879 | -1.33421778  | 0.18751024  |
| RTCD1         | 1.692469762  | 0.094127206 | -1.402730591 | 0.166064695 | -1.406607484 | 0.165046049 |
| RTDR1         | -3.065477396 | 0.00289288  | -1.184636033 | 0.24102671  | -1.42266069  | 0.160358093 |
| RTEL1         | 1.029827182  | 0.305939513 | 0.981808077  | 0.330300667 | 1.163543578  | 0.249522115 |
| RTEL1-TNFRSF6 | 0.652266999  | 0.5159449   | 0.707953627  | 0.48182923  | 0.703383927  | 0.484718537 |
| RTF1          | -3.072732249 | 0.00283025  | 1.756818369  | 0.084263637 | 1.238787126  | 0.220570099 |
| RTKN          | 0.366713262  | 0.714721371 | -0.429928369 | 0.668852028 | 0.40911886   | 0.684006415 |

|           |              |             |              |             |              |             |
|-----------|--------------|-------------|--------------|-------------|--------------|-------------|
| RTKN2     | 1.477658854  | 0.143102416 | -0.318598319 | 0.751183595 | -1.306241285 | 0.196788012 |
| RTN1      | -0.613800669 | 0.540945219 | 0.632797563  | 0.529370268 | 0.009261412  | 0.992643345 |
| RTN2      | -1.869898757 | 0.064853815 | 0.329928105  | 0.742651274 | 0.446146798  | 0.657204335 |
| RTN3      | -3.452499957 | 0.000859022 | 0.885645575  | 0.379491252 | 0.785551414  | 0.435427586 |
| RTN4      | 0.271108685  | 0.786948262 | -0.11782729  | 0.906614451 | -1.314291563 | 0.194083615 |
| RTN4IP1   | 1.550634699  | 0.124611664 | 0.573061733  | 0.568833542 | 2.349103773  | 0.022356547 |
| RTN4R     | -0.387654727 | 0.699216323 | 0.06329967   | 0.949747049 | -0.312009343 | 0.756187324 |
| RTN4RL1   | -1.011391836 | 0.314627477 | 0.385695529  | 0.70114309  | 1.400691436  | 0.166800163 |
| RTP4      | -2.60172913  | 0.010896947 | 1.271343885  | 0.208716557 | -0.148531732 | 0.882454471 |
| RTTN      | 1.86558112   | 0.065462899 | -0.835791495 | 0.406726127 | 0.013360526  | 0.989387446 |
| RUFY1     | -2.366733108 | 0.020160223 | 2.473672796  | 0.016343754 | 1.367549094  | 0.176894037 |
| RUFY2     | 2.862230867  | 0.005266499 | -2.434482932 | 0.018033949 | -3.337531257 | 0.001503504 |
| RUFY3     | 0.257280624  | 0.79756836  | -0.69651116  | 0.488910258 | -0.840908054 | 0.403960809 |
| RUFY4     | 0.062688813  | 0.950157797 | 2.576989459  | 0.012551137 | 0.902454926  | 0.370664448 |
| RUNDC1    | -2.368398455 | 0.020075304 | 1.258485656  | 0.213293641 | 0.035193598  | 0.972049991 |
| RUNDC2A   | -0.189065973 | 0.850480525 | 0.131975316  | 0.89546377  | -0.566460741 | 0.573334443 |
| RUNDC2C   | -0.623467727 | 0.534604845 | 1.243865344  | 0.218587805 | 1.929958147  | 0.058661545 |
| RUNDC3A   | -3.328157558 | 0.001281877 | 0.662968896  | 0.509995082 | -0.355503842 | 0.72354218  |
| RUNDC3B   | 0.239192917  | 0.811517361 | -0.225905108 | 0.822074952 | -0.266091285 | 0.791142066 |
| RUNX1     | -1.529991436 | 0.129639059 | -0.956281882 | 0.342926551 | -1.213238165 | 0.23011017  |
| RUNX2     | 0.658924164  | 0.511680931 | -2.33557336  | 0.02301836  | -3.094590294 | 0.003068941 |
| RUNX3     | -0.391246427 | 0.696569586 | -1.24650917  | 0.21762334  | -0.516489563 | 0.607537669 |
| RUSC1     | -0.002698633 | 0.99785297  | -0.881083746 | 0.38193447  | -0.342650943 | 0.73313853  |
| RUSC1-AS1 | 0.157605551  | 0.875132054 | -2.112641705 | 0.038977534 | -0.094914332 | 0.924720265 |
| RUSC2     | 0.679926054  | 0.498352633 | 0.959699116  | 0.34121818  | 0.523196213  | 0.602893233 |
| RUVBL1    | 0.133984191  | 0.893723864 | 1.849245339  | 0.069556181 | 3.043984016  | 0.003547096 |
| RUVBL2    | -0.79236243  | 0.43030005  | 0.587027638  | 0.559479268 | 1.374492534  | 0.174741515 |
| RWDD1     | 0.673961613  | 0.502118614 | 0.233036454  | 0.816559282 | 0.785609433  | 0.435393863 |
| RWDD2A    | 0.689803797  | 0.492149532 | -0.61085611  | 0.543698047 | 1.19945381   | 0.235380787 |
| RWDD2B    | 0.703512165  | 0.48361112  | -0.573839055 | 0.568310886 | 0.74533492   | 0.459173153 |
| RWDD3     | 0.758817716  | 0.45000811  | 0.52199454   | 0.603675929 | 0.461976229  | 0.645880623 |
| RWDD4     | -0.201357161 | 0.84088833  | -1.306271885 | 0.196652698 | -1.356092897 | 0.180489812 |
| RXFP4     | -0.687819238 | 0.493392419 | -0.043055019 | 0.965806591 | 0.335287956  | 0.738655424 |
| RXRA      | -2.666296502 | 0.009139635 | 0.003355295  | 0.997334461 | -0.410039379 | 0.683334951 |
| RXRB      | -0.176665073 | 0.860181203 | -2.09765929  | 0.04033415  | -0.894130358 | 0.375062902 |
| RYBP      | -2.729700363 | 0.007668437 | -1.567748773 | 0.12241785  | -2.398339607 | 0.019811523 |
| RYK       | 1.27962423   | 0.204071954 | -1.249617307 | 0.216493513 | -1.263536297 | 0.211609512 |
| RYR1      | 0.084265393  | 0.933038607 | -0.08084019  | 0.935849297 | 0.832076825  | 0.408885063 |
| RYR3      | -0.036030387 | 0.971340493 | -1.083060457 | 0.283294903 | -2.617750097 | 0.011351005 |
| S100A10   | -0.864965985 | 0.389431104 | -0.979968764 | 0.331199984 | -0.39425785  | 0.694881809 |
| S100A11   | -2.95991345  | 0.00396235  | -2.171260033 | 0.03404491  | -2.401598094 | 0.01965263  |
| S100A12   | -1.969190829 | 0.052106648 | -1.139650985 | 0.259149115 | -0.750822262 | 0.455889921 |
| S100A13   | 1.070755272  | 0.287234629 | 1.600771429  | 0.114898822 | 2.433488202  | 0.018156876 |
| S100A4    | -1.616014691 | 0.109704025 | 1.158146822  | 0.251583948 | 2.11131767   | 0.039202295 |
| S100A6    | -1.91711489  | 0.058498105 | -1.442269613 | 0.154642331 | -0.632509343 | 0.529617528 |
| S100A8    | -0.343860462 | 0.731779108 | -0.680343333 | 0.499012852 | -0.665666709 | 0.508345392 |
| S100A9    | -1.50642008  | 0.135573977 | -0.660275246 | 0.511709263 | -0.393924767 | 0.695126313 |
| S100B     | 0.68523983   | 0.4950104   | -0.958516718 | 0.34180866  | 0.261804299  | 0.794428867 |
| S100P     | -2.375756004 | 0.019703917 | -0.871413544 | 0.387146273 | -0.896167537 | 0.373983468 |
| S100PBP   | 3.538325527  | 0.000648107 | -0.36598636  | 0.715716109 | -0.161056647 | 0.872625976 |
| S100Z     | 0.429539284  | 0.668590453 | -0.082400986 | 0.934613551 | 0.28250828   | 0.778590989 |
| S1PR1     | 0.824616194  | 0.411839817 | -0.864485764 | 0.390907269 | -1.003539414 | 0.319899267 |
| S1PR2     | 0.037907429  | 0.969848151 | 1.152474315  | 0.253887125 | 1.097130099  | 0.277260212 |
| S1PR3     | -2.052834238 | 0.043086263 | -0.88602534  | 0.379288303 | -0.208762518 | 0.835387951 |
| S1PR4     | -0.240152719 | 0.8107756   | -1.141661791 | 0.258318903 | -1.149563949 | 0.255188979 |
| S1PR5     | 0.65111308   | 0.516685897 | -2.994260699 | 0.004049365 | -1.98840747  | 0.051641634 |
| SAAL1     | 0.185186535  | 0.853512838 | 1.157714203  | 0.251759073 | 2.632783568  | 0.010914247 |
| SAC3D1    | -1.011388153 | 0.31462923  | 0.987816906  | 0.327374016 | 0.121345785  | 0.903849706 |
| SACM1L    | 0.935750826  | 0.35198609  | -1.532108229 | 0.130970396 | -0.214669894 | 0.045885729 |
| SACS      | 1.101003817  | 0.27392531  | 0.02810783   | 0.977673315 | -0.288502666 | 0.774022722 |
| SAE1      | -0.573746843 | 0.567616216 | 3.303795461  | 0.001643642 | 3.699439628  | 0.000492733 |
| SAFB      | 0.015203974  | 0.987904188 | 1.297492687  | 0.199634523 | 1.330695607  | 0.188659715 |
| SAFB2     | 0.642793477  | 0.522044945 | 0.226119779  | 0.821908783 | 0.702629148  | 0.485185283 |
| SALL2     | 0.873856129  | 0.384597179 | 1.062955655  | 0.292238511 | 2.374822982  | 0.020992815 |
| SALL4     | 0.625164334  | 0.533496031 | -2.085205754 | 0.04149287  | -0.862110738 | 0.392287974 |
| SAMD1     | 1.733360536  | 0.086566733 | -0.165572215 | 0.869073414 | 0.192445898  | 0.848086216 |
| SAMD10    | 1.591595277  | 0.115095029 | -1.167731289 | 0.247726475 | 0.505714231  | 0.615033837 |
| SAMD12    | -0.254487572 | 0.79971816  | 0.054510368  | 0.95671719  | 1.343136431  | 0.184623354 |
| SAMD14    | -3.307670414 | 0.001368025 | 0.310084444  | 0.757615963 | -0.045326853 | 0.964007355 |
| SAMD3     | 0.713610185  | 0.477374126 | -1.313466814 | 0.194234023 | -0.165479731 | 0.86915985  |
| SAMD4A    | -0.906865863 | 0.366977268 | -0.199686573 | 0.842429047 | -1.115199581 | 0.269507912 |
| SAMD4B    | 0.504771987  | 0.614992426 | -1.74763703  | 0.085856365 | -1.385447739 | 0.171386221 |

|          |              |             |              |             |              |             |
|----------|--------------|-------------|--------------|-------------|--------------|-------------|
| SAMD8    | -0.55193295  | 0.582406261 | -1.259191744 | 0.213040384 | -2.624678405 | 0.011147779 |
| SAMD9    | -0.759454331 | 0.449629307 | -0.855903535 | 0.395597902 | -2.523727788 | 0.014463161 |
| SAMD9L   | -0.456724501 | 0.649004892 | -1.037098529 | 0.304024473 | -3.301204533 | 0.001675948 |
| SAMHD1   | -1.906077656 | 0.059934665 | 2.50249151   | 0.01519344  | 1.643094897  | 0.105943567 |
| SAMM50   | -0.438660966 | 0.661992275 | 1.91613437   | 0.060315414 | 3.554360089  | 0.00077615  |
| SAMSN1   | -0.095162228 | 0.924404343 | 0.087468666  | 0.930602389 | -0.448382489 | 0.655600027 |
| SAP130   | -1.678608015 | 0.096809275 | -0.237255838 | 0.813300207 | -0.07785909  | 0.938216507 |
| SAP18    | -3.213975219 | 0.001835827 | -2.220536782 | 0.030330917 | -1.865064244 | 0.067392958 |
| SAP25    | -0.992700884 | 0.323602779 | -0.624410519 | 0.534823668 | 0.820885937  | 0.415177491 |
| SAP30    | -1.622981193 | 0.108203838 | 0.110271596  | 0.91257732  | -1.744165199 | 0.086594105 |
| SAP30BP  | -0.206486205 | 0.836892568 | 1.909418067  | 0.061193522 | 2.960145021  | 0.004495097 |
| SAP30L   | 0.057489853  | 0.954286539 | -0.613027887 | 0.542271091 | -1.23694076  | 0.221249625 |
| SAR1A    | 0.129834022  | 0.896996811 | 0.540340477  | 0.591045636 | 0.998118117  | 0.322497548 |
| SAR1B    | 0.618134363  | 0.538098139 | -0.169854659 | 0.865719638 | -0.292182386 | 0.771222404 |
| SARDH    | 2.026576669  | 0.04576135  | -0.289770054 | 0.773032776 | 0.916290377  | 0.363427288 |
| SARM1    | 2.386663557  | 0.019164567 | 0.40715388   | 0.685404206 | 1.483053557  | 0.143643051 |
| SARNP    | 1.09628371   | 0.275973444 | 0.242557555  | 0.809209837 | 0.516855548  | 0.607283798 |
| SARS     | -0.41021427  | 0.682655033 | 1.283084271  | 0.204601547 | 2.319400879  | 0.024029477 |
| SARS2    | 0.273809643  | 0.784878526 | 0.652969186  | 0.516374174 | 1.778784791  | 0.080680115 |
| SART1    | -0.468522745 | 0.640580069 | 1.930834757  | 0.058430792 | 1.898805025  | 0.062724941 |
| SART3    | 1.184562673  | 0.239409412 | 2.876990692  | 0.005621758 | 2.836462981  | 0.006330268 |
| SASH1    | 1.315983631  | 0.191629062 | 0.610736589  | 0.543776634 | -0.00315709  | 0.997492184 |
| SASH3    | -2.36762015  | 0.020114952 | 0.384573135  | 0.70197003  | 0.752372532  | 0.454964813 |
| SASS6    | 0.799819318  | 0.425989251 | -0.988392807 | 0.327094429 | -1.288003775 | 0.203019342 |
| SAT1     | -2.104516973 | 0.03821179  | 0.252112175  | 0.80185184  | -0.556394414 | 0.580148593 |
| SAT2     | -0.653634571 | 0.515067431 | 2.439877104  | 0.017792342 | 2.280060023  | 0.026416415 |
| SATB1    | 2.78882513   | 0.006494532 | 0.16519212   | 0.869371202 | -0.3140641   | 0.754634467 |
| SATB2    | -1.230312339 | 0.221889273 | 1.078950864  | 0.285107411 | 0.694525445  | 0.490212218 |
| SAV1     | -0.666050131 | 0.507137507 | 0.395333465  | 0.694057239 | -0.480029917 | 0.633068004 |
| SBDS     | 1.315358189  | 0.191838191 | -1.237447195 | 0.220942244 | -0.581275829 | 0.563377184 |
| SBDSP1   | 0.164528932  | 0.869695609 | -1.149314032 | 0.255176791 | -0.656643973 | 0.514088036 |
| SBF1     | 1.01620543   | 0.312343228 | 0.099283279  | 0.921258105 | 0.672096617  | 0.504274165 |
| SBF2     | -1.098391793 | 0.275057402 | -0.296342022 | 0.768034834 | -2.0526765   | 0.044768019 |
| SBK1     | 1.269756851  | 0.207549773 | -1.730378713 | 0.088917804 | -0.600332475 | 0.550669365 |
| SBNO1    | -0.294063463 | 0.769408328 | 1.111655625  | 0.270905038 | 0.777696747  | 0.440007348 |
| SBNO2    | -0.442240847 | 0.659410006 | -1.648301634 | 0.104735722 | -2.404806006 | 0.01949732  |
| SC4MOL   | 1.426127532  | 0.157402315 | -1.812147419 | 0.075177101 | -0.871574822 | 0.387146141 |
| SC5DL    | 1.569928351  | 0.120053979 | -1.687842697 | 0.096849952 | -1.687161351 | 0.097112243 |
| SCAF1    | -0.796988734 | 0.427622575 | -0.640134325 | 0.524623685 | -0.487154232 | 0.628642568 |
| SCAF11   | 0.993704247  | 0.323116699 | 0.248474694  | 0.804650972 | -1.439299721 | 0.155608818 |
| SCAF4    | -0.368129943 | 0.713668588 | 0.275328677  | 0.784049073 | 0.529866815  | 0.598290104 |
| SCAF8    | -0.963875823 | 0.337773963 | 1.828719695  | 0.072620751 | 1.111593667  | 0.271042625 |
| SCAI     | 1.169303924  | 0.245467991 | -1.859812817 | 0.068021369 | -1.953355674 | 0.055759288 |
| SCAMP1   | 0.959165056  | 0.340127904 | -0.553075443 | 0.582352196 | -1.870361377 | 0.066641227 |
| SCAMP2   | -0.77716934  | 0.439162408 | -0.686490752 | 0.495158226 | -0.329032666 | 0.743353243 |
| SCAMP3   | -0.402412433 | 0.688365412 | 0.129551067  | 0.897372987 | 0.696180712  | 0.489183081 |
| SCAMP4   | 0.43433251   | 0.66511998  | -0.681544758 | 0.498258236 | 0.320154529  | 0.7500377   |
| SCAMP5   | 3.189783222  | 0.001978901 | 1.284795681  | 0.204006788 | 0.836693656  | 0.406306177 |
| SCAND1   | -0.8473317   | 0.399130212 | -0.40821458  | 0.684629774 | -0.320049396 | 0.750116973 |
| SCAND2   | 1.496409066  | 0.138158319 | 2.147237942  | 0.035995975 | 3.007278425  | 0.003936518 |
| SCAP     | -0.2469815   | 0.805503161 | -0.466828691 | 0.642383553 | 0.356871424  | 0.722523694 |
| SCAPER   | 1.34069506   | 0.183502197 | 1.017350434  | 0.313241285 | 0.992011916  | 0.325440968 |
| SCARA5   | 0.42093427   | 0.674838872 | -0.369048391 | 0.713444883 | -0.572700442 | 0.569130287 |
| SCARB1   | 0.552404742  | 0.582084452 | -0.352069757 | 0.726070882 | 0.035733013  | 0.971621784 |
| SCARB2   | -0.978453801 | 0.330557064 | 0.251605627  | 0.802241486 | -1.497318485 | 0.139902443 |
| SCARF1   | -1.736966724 | 0.085924605 | 0.205940083  | 0.837563917 | -0.647391726 | 0.520012546 |
| SCARF2   | 0.367479085  | 0.714152194 | -1.698640188 | 0.09478335  | -0.681462361 | 0.498375791 |
| SCARNA10 | 0.035570367  | 0.971706248 | 0.68211592   | 0.497899708 | 0.336464814  | 0.737772698 |
| SCARNA12 | 1.121949293  | 0.264964335 | 0.134566318  | 0.893423914 | 0.873148665  | 0.386295183 |
| SCARNA16 | -1.504825835 | 0.13598297  | 0.884309244  | 0.380205938 | 1.204336231  | 0.233503986 |
| SCARNA17 | -0.431446415 | 0.667208751 | -3.198672111 | 0.002245094 | -3.861792889 | 0.000293194 |
| SCARNA2  | 0.711733368  | 0.478529935 | -2.69160346  | 0.009292995 | -3.342387543 | 0.001481766 |
| SCARNA7  | -2.137168739 | 0.035384444 | -0.621198151 | 0.536920082 | -1.767839975 | 0.082512289 |
| SCARNA9  | -0.015774942 | 0.987449981 | -3.264690466 | 0.001847013 | -2.93177669  | 0.004865959 |
| SCCPDH   | -1.646398035 | 0.103281906 | 1.686466679  | 0.097115955 | 1.251343322  | 0.215989718 |
| SCD      | 2.402829162  | 0.018389357 | 0.527628377  | 0.599784068 | 0.414690301  | 0.679946325 |
| SCD5     | -0.861263182 | 0.39145551  | -1.269755187 | 0.209278092 | -0.878476113 | 0.383423409 |
| SCFD1    | 2.062794712  | 0.042107263 | 0.146289852  | 0.884203394 | 0.390776533  | 0.697438915 |
| SCFD2    | -1.659312047 | 0.100645969 | 1.256309474  | 0.214075588 | 1.362667977  | 0.178419324 |
| SCGB3A1  | 0.651800137  | 0.516244631 | -0.319237521 | 0.750701376 | -1.728493535 | 0.089387127 |
| SCLT1    | -1.079305401 | 0.283428337 | 0.305160486  | 0.761344002 | -1.63345895  | 0.107959382 |
| SCLY     | -0.802018609 | 0.42472276  | -2.885550917 | 0.005490158 | -2.421356393 | 0.018713401 |

|         |              |             |              |             |              |             |
|---------|--------------|-------------|--------------|-------------|--------------|-------------|
| SCMH1   | 1.597590832  | 0.113752157 | -1.013254658 | 0.315176258 | -0.658244459 | 0.513066862 |
| SCML1   | 1.990088981  | 0.049714138 | -0.796429968 | 0.429052776 | -1.098459837 | 0.276684453 |
| SCML2   | 0.4859252    | 0.628239209 | 0.39230647   | 0.696279779 | 0.155416482  | 0.877049499 |
| SCML4   | 2.929648374  | 0.004330459 | -0.184021207 | 0.854643173 | 0.50642882   | 0.614535421 |
| SCN11A  | 2.472801006  | 0.015346481 | 0.152154475  | 0.879596838 | 1.607525129  | 0.113539853 |
| SCN1B   | -2.064628449 | 0.041929131 | -1.084397569 | 0.28270691  | -1.937450215 | 0.057718506 |
| SCN3A   | 0.593736714  | 0.554225512 | 0.204069914  | 0.839018219 | -0.552536712 | 0.582770263 |
| SCN3B   | -1.405149708 | 0.16352983  | 0.563390956  | 0.575355597 | -0.918059775 | 0.362508327 |
| SCN4A   | -0.189096117 | 0.850456972 | -0.019482963 | 0.984523165 | 0.82279452   | 0.414100193 |
| SCN5A   | -0.283713366 | 0.777302672 | -1.638138098 | 0.106845072 | -0.328020771 | 0.74411412  |
| SCN8A   | 1.087138388  | 0.27997193  | -0.787394425 | 0.434279323 | -1.112337855 | 0.270725389 |
| SCN9A   | -1.277811909 | 0.204707463 | -2.038726428 | 0.046076481 | -1.857693358 | 0.068450891 |
| SCNM1   | -1.885460939 | 0.062697808 | -2.358176935 | 0.02178181  | -1.653586002 | 0.103783819 |
| SCNN1A  | 0.601866224  | 0.548825091 | 1.252261888  | 0.215535608 | 2.638055424  | 0.010764755 |
| SCNN1D  | 1.080511228  | 0.282894344 | -0.638131581 | 0.525917155 | 0.698406562  | 0.487801079 |
| SCO1    | 0.432474834  | 0.666464145 | 0.403458474  | 0.688104915 | 0.222519627  | 0.82471559  |
| SCO2    | -0.08204598  | 0.934798208 | -0.701190721 | 0.486007435 | -2.399725982 | 0.019743779 |
| SCOC    | 0.623786761  | 0.534396251 | -0.307511318 | 0.759563419 | -0.47097389  | 0.639481218 |
| SCP2    | 0.238290288  | 0.812215095 | 0.409306001  | 0.683833269 | 0.777695207  | 0.440008249 |
| SCPEP1  | -2.106943778 | 0.037995125 | 3.218046391  | 0.002120604 | 2.61096945   | 0.011553165 |
| SCRIB   | 0.753134449  | 0.453397951 | -0.640608676 | 0.524317571 | -0.187859623 | 0.8516629   |
| SCRN1   | 1.783893586  | 0.07792012  | 0.559018259  | 0.578316442 | 0.856272599  | 0.395480942 |
| SCRN2   | 1.184976619  | 0.23924656  | 0.786375694  | 0.434870959 | 1.109711572  | 0.271846102 |
| SCRN3   | 1.012300657  | 0.314195351 | -2.27962141  | 0.026352215 | -2.835888264 | 0.006340219 |
| SCR2    | -0.936223529 | 0.351744085 | -2.181393838 | 0.033250066 | -1.127867884 | 0.264164739 |
| SCT     | 0.711895747  | 0.478429875 | -0.443448599 | 0.659102629 | -0.496703877 | 0.621343036 |
| SCUBE3  | 2.96895044   | 0.003858172 | -0.088015149 | 0.930169943 | 0.709196777  | 0.481132331 |
| SCYL1   | -0.664093705 | 0.508382748 | 1.987538778  | 0.051624489 | 2.162476394  | 0.034849516 |
| SCYL2   | -1.187516954 | 0.238248898 | -1.256337571 | 0.214065478 | -2.712521181 | 0.008843691 |
| SCYL3   | 0.395473791  | 0.693459235 | 1.011443192  | 0.316034617 | 0.561888678  | 0.576424555 |
| SDAD1   | 1.118481399  | 0.266433619 | 2.696928804  | 0.009162364 | 3.450142158  | 0.001069458 |
| SDC1    | -0.526723923 | 0.599722834 | 3.446848956  | 0.001065789 | 1.531033452  | 0.131367457 |
| SDC2    | -1.452913299 | 0.149837474 | -1.223253308 | 0.226215287 | -0.889943762 | 0.377287441 |
| SDC3    | -2.764866146 | 0.006948864 | 1.369001417  | 0.176314173 | 1.016268968  | 0.313853736 |
| SDC4    | -2.010482274 | 0.047470414 | 2.191467401  | 0.032476144 | 2.959614832  | 0.00450178  |
| SDCBP   | -2.895293879 | 0.004786379 | 0.576407891  | 0.566585334 | -0.459308195 | 0.647783422 |
| SDCCAG3 | 1.249823981  | 0.214708284 | 1.306184244  | 0.196682299 | 2.391433419  | 0.020152101 |
| SDCCAG8 | -0.365541158 | 0.715592819 | 0.657590129  | 0.51342108  | 2.175493341  | 0.033811983 |
| SDF2    | -1.3587917   | 0.177717466 | 1.444158749  | 0.154112299 | 0.685286695  | 0.495978171 |
| SDF2L1  | 0.412703996  | 0.680836598 | -2.818206101 | 0.006607333 | -2.314230536 | 0.024331812 |
| SDF4    | -0.91963527  | 0.36030072  | -0.045883807 | 0.963561581 | -0.051364834 | 0.95921682  |
| SDHA    | -0.525453361 | 0.600601852 | 2.607238992  | 0.011602973 | 2.442545288  | 0.017751148 |
| SDHAF1  | 1.200762666  | 0.233095327 | -0.623675366 | 0.53530306  | -0.663566874 | 0.50967877  |
| SDHAF2  | -1.500491516 | 0.137099809 | 1.652955668  | 0.103781209 | 1.437872645  | 0.156011802 |
| SDHAP1  | 3.963067261  | 0.000151002 | -2.369185166 | 0.021201351 | -1.561387885 | 0.124042627 |
| SDHAP2  | 2.250723567  | 0.026918455 | -0.094509628 | 0.925032361 | -0.966204764 | 0.338078567 |
| SDHAP3  | 1.385689067  | 0.169376205 | -1.278653654 | 0.20614731  | -0.786909856 | 0.434638403 |
| SDHB    | -2.79830284  | 0.006322434 | 0.61650812   | 0.539988425 | 0.798953367  | 0.42767894  |
| SDHC    | -2.06738188  | 0.041662876 | -0.272391518 | 0.78629515  | 0.250767412  | 0.802907896 |
| SDHD    | -1.124200644 | 0.264013524 | -2.133598993 | 0.037146712 | -1.58582045  | 0.118387626 |
| SDK1    | -1.744468194 | 0.084601414 | -0.353841438 | 0.724749742 | -0.125355547 | 0.900689135 |
| SDK2    | 0.970242747  | 0.334609411 | 0.609884967  | 0.544336751 | 2.025633601  | 0.047557362 |
| SDPR    | -5.442724231 | 4.76E-07    | 1.634856712  | 0.107533425 | -0.710684866 | 0.480216653 |
| SDR39U1 | 2.42786014   | 0.017244037 | -0.020499673 | 0.983715625 | -0.069177767 | 0.945093516 |
| SDR42E1 | -0.301208564 | 0.763972632 | 1.023372682  | 0.310410789 | 0.524843421  | 0.601755036 |
| SDSL    | -2.350502914 | 0.021004673 | 1.815991378  | 0.074577531 | 0.885978977  | 0.379401805 |
| SEC1    | 0.276242794  | 0.783015334 | 0.616928545  | 0.539713004 | -0.289861661 | 0.772988154 |
| SEC11A  | -1.215386519 | 0.227499521 | -1.550047293 | 0.126607951 | -1.200377038 | 0.235025061 |
| SEC11C  | 1.118382352  | 0.266475667 | -1.154832501 | 0.252927821 | -0.216345415 | 0.829501376 |
| SEC13   | -1.158027516 | 0.250015117 | 1.26910478   | 0.209508306 | 1.816227983  | 0.074666832 |
| SEC14L1 | -3.151509229 | 0.002226679 | 0.097662218  | 0.922539587 | -0.461306988 | 0.646357692 |
| SEC14L2 | 2.379252891  | 0.019529555 | -0.652778657 | 0.516496129 | 0.755985172  | 0.452813225 |
| SEC14L4 | -0.782027802 | 0.436316857 | 2.366858015  | 0.021322895 | 0.55507555   | 0.581044246 |
| SEC14L5 | -3.359473547 | 0.00115998  | 1.608959294  | 0.113093355 | 0.56792804   | 0.572344454 |
| SEC16A  | 0.965196482  | 0.337115953 | 0.535712841  | 0.594219766 | 1.075758739  | 0.286628786 |
| SEC16B  | 0.616530035  | 0.539151232 | 0.249818092  | 0.803616892 | -0.979620671 | 0.331469001 |
| SEC22A  | 1.814119412  | 0.073099051 | -0.924279442 | 0.35919707  | -0.783512058 | 0.436613936 |
| SEC22B  | 0.148481595  | 0.882305583 | -0.211109575 | 0.833546934 | -1.435569322 | 0.156663939 |
| SEC22C  | 2.748896477  | 0.00726763  | 0.222728302  | 0.824534947 | 1.943595735  | 0.056954649 |
| SEC23A  | -0.18306658  | 0.855170807 | 0.084686727  | 0.932804127 | -1.296325172 | 0.200158043 |
| SEC23B  | -0.990034623 | 0.324896804 | 1.727160832  | 0.08949849  | 1.463152814  | 0.148992552 |
| SEC23IP | 0.498341318  | 0.61949829  | 1.678451062  | 0.098677417 | 0.52100979   | 0.604405555 |

|             |              |             |              |             |              |             |
|-------------|--------------|-------------|--------------|-------------|--------------|-------------|
| SEC24A      | 0.238328467  | 0.812185579 | -0.382270058 | 0.703667989 | -2.027551681 | 0.04735469  |
| SEC24B      | -0.45792355  | 0.64814657  | -1.26288775  | 0.21171835  | -1.661701114 | 0.102137959 |
| SEC24C      | -1.485573309 | 0.140998924 | 0.592849548  | 0.555602532 | 0.556390778  | 0.580151062 |
| SEC24D      | -2.283662859 | 0.024821756 | 0.312654924  | 0.755672085 | -0.45053732  | 0.654055285 |
| SEC31A      | -0.191940145 | 0.848235412 | 0.583289526  | 0.561975511 | 0.539278487  | 0.591823475 |
| SEC31B      | 2.299123226  | 0.023888251 | 0.683001402  | 0.497344153 | 2.110061345  | 0.039314904 |
| SEC61A1     | -0.251803363 | 0.801785639 | 1.338191184  | 0.186093291 | 2.095473627  | 0.040643233 |
| SEC61A2     | -0.321679694 | 0.748465293 | -2.991233657 | 0.004084196 | -1.968152334 | 0.053988004 |
| SEC61B      | -1.723574656 | 0.088329116 | -3.693795713 | 0.000493211 | -2.848687019 | 0.006121995 |
| SEC61G      | -0.82088309  | 0.413951664 | -1.498487514 | 0.139467758 | -0.203636345 | 0.839372774 |
| SEC62       | 0.25887784   | 0.796339691 | -0.09727426  | 0.922846306 | -0.126492286 | 0.899793427 |
| SEC63       | 2.124865612  | 0.036427722 | 0.41911143   | 0.676693666 | 0.633253389  | 0.529135136 |
| SECISBP2    | 2.034131779  | 0.044977433 | 0.826276592  | 0.412056984 | 1.659085577  | 0.102666082 |
| SECISBP2L   | 0.97941524   | 0.330084693 | -0.660232666 | 0.511736384 | -2.026900041 | 0.047423461 |
| SECTM1      | -1.567588796 | 0.120599469 | -0.961869085 | 0.340136259 | -2.279463246 | 0.026454189 |
| SEH1L       | 3.583280688  | 0.000558213 | 1.523226229  | 0.133174183 | 3.126969077  | 0.002795413 |
| SEL1L       | -0.236550469 | 0.813560404 | -0.484004619 | 0.630217858 | -1.430508923 | 0.158104136 |
| SEL1L3      | 1.424587952  | 0.157845914 | 0.650052634  | 0.518242689 | 0.690952807  | 0.492437521 |
| SELENBP1    | -2.728061447 | 0.007703574 | 1.192642524  | 0.237899633 | 0.326625342  | 0.745163809 |
| SELK        | -2.882507497 | 0.004967065 | -0.947214364 | 0.347486798 | -1.187585652 | 0.239988558 |
| SELL        | -2.277125472 | 0.025226058 | -0.039968211 | 0.968256692 | -0.58174186  | 0.563065356 |
| SELM        | 2.857243656  | 0.005342646 | 0.676333646  | 0.501535843 | 1.486224855  | 0.142804723 |
| SELO        | 0.495421142  | 0.621549234 | -0.131362167 | 0.895946597 | 0.658902643  | 0.51264723  |
| SELP        | -2.453582281 | 0.016133819 | 2.325211265  | 0.02360586  | 1.422189875  | 0.160494097 |
| SELPLG      | -2.154012248 | 0.033998266 | 0.261186347  | 0.794880481 | -0.188092363 | 0.851481318 |
| SELRC1      | 1.05151481   | 0.295927853 | -2.507140688 | 0.015014875 | -0.129821864 | 0.897170604 |
| SELS        | 1.404737835  | 0.163651942 | -0.117768022 | 0.906661204 | -0.539866974 | 0.591420231 |
| SELT        | -0.614317496 | 0.54060528  | -0.598220682 | 0.552037938 | -1.073329191 | 0.287707567 |
| SEMA3B      | 0.581936595  | 0.562111086 | -1.18229093  | 0.241948232 | -1.047202597 | 0.299486207 |
| SEMA3C      | -0.568454362 | 0.571187722 | -0.139777741 | 0.889323244 | -1.873575666 | 0.066188544 |
| SEMA3G      | 1.136674815  | 0.258788701 | 0.483674761  | 0.630450543 | 0.171328612  | 0.864580377 |
| SEMA4A      | -1.99634966  | 0.049015888 | 0.556117407  | 0.580284719 | 0.163861525  | 0.870427653 |
| SEMA4B      | -1.807959689 | 0.074060873 | 0.003953534  | 0.996859206 | -0.448902041 | 0.655227435 |
| SEMA4C      | 2.392114707  | 0.018899973 | -0.370793101 | 0.712151928 | 0.218699826  | 0.827675636 |
| SEMA4D      | -2.061688047 | 0.042215082 | 0.23977277   | 0.81135769  | 0.698581194  | 0.487692743 |
| SEMA4F      | 3.877612497  | 0.00020407  | -0.830257908 | 0.40982124  | 0.899290318  | 0.372332645 |
| SEMA4G      | 2.560779046  | 0.012164326 | -2.104805643 | 0.039682025 | -0.145501092 | 0.884835516 |
| SEMA5A      | 1.499257088  | 0.137419202 | 2.475609709  | 0.016264047 | 0.56420205   | 0.574860012 |
| SEMA6A      | 0.695991133  | 0.488285526 | -0.641748738 | 0.523582237 | 0.338459824  | 0.736277112 |
| SEMA6B      | -0.625917085 | 0.533004451 | -0.087327499 | 0.930714101 | -0.849394244 | 0.399263448 |
| SEMA6C      | 0.334814121  | 0.738569453 | -0.130595179 | 0.896550621 | -0.578395415 | 0.565306397 |
| SEMA7A      | -0.680694182 | 0.497868746 | 0.110836465  | 0.912131352 | -1.96292849  | 0.054607757 |
| SEMG1       | -0.714395184 | 0.476891157 | -1.6528009   | 0.103812836 | -0.766901439 | 0.446347772 |
| SENP1       | -0.991599691 | 0.32413681  | -2.452344428 | 0.017245026 | -1.96153671  | 0.054773901 |
| SENP2       | -1.477862724 | 0.143047926 | 0.168669975  | 0.866647173 | -0.55737225  | 0.579484965 |
| SENP3       | -2.75303732  | 0.007183719 | -2.594295533 | 0.012000405 | -1.684481234 | 0.097631538 |
| SENP5       | 2.574448504  | 0.011727205 | 2.036136664  | 0.046344275 | 3.32734071   | 0.001550106 |
| SENP6       | 1.089818703  | 0.278795925 | -0.751132872 | 0.455630795 | -1.90366415  | 0.062075835 |
| SENP7       | 0.954744571  | 0.342346497 | -1.410110366 | 0.163884694 | -2.201727398 | 0.03180307  |
| SENP8       | 0.521809875  | 0.60312582  | -1.127193353 | 0.264334841 | -2.099644165 | 0.040259541 |
| Sep-15      | 0.276103758  | 0.783121767 | -0.976480571 | 0.332909966 | -1.006923013 | 0.318284744 |
| SEPHS1      | 0.821731962  | 0.413470879 | -0.493271231 | 0.623696528 | -0.041493366 | 0.967049549 |
| SEPHS1P     | 1.023608199  | 0.308852052 | -0.492782337 | 0.624039835 | 0.452839245  | 0.652406775 |
| SEPHS2      | -2.331739652 | 0.022019869 | -0.377750737 | 0.707004294 | -0.823211822 | 0.413864874 |
| SEPN1       | 0.358602672  | 0.720759204 | 0.412687857  | 0.681367527 | 0.728004074  | 0.469631536 |
| SEPSECS     | 0.611022531  | 0.542774374 | -1.510769267 | 0.136314485 | -1.748957996 | 0.085754515 |
| Sep-01      | 0.081548849  | 0.935192389 | 0.271734937  | 0.786797494 | 2.003170052  | 0.049987217 |
| Sep-10      | 0.097038418  | 0.922918601 | 1.245420035  | 0.218020274 | 0.702153664  | 0.485479444 |
| Sep-11      | -0.238896167 | 0.811746733 | 0.050704177  | 0.959736683 | 0.110008075  | 0.912794607 |
| Sep-14      | -0.60431069  | 0.547206418 | 0.699677912  | 0.486944812 | -1.003370805 | 0.319979865 |
| Sep-02      | 1.561919321  | 0.121929549 | 2.480150889  | 0.016078542 | 1.79225886   | 0.078471255 |
| Sep-04      | -1.907616227 | 0.059732643 | 0.885655218  | 0.379486097 | 0.648512778  | 0.51929278  |
| SEPT5-GP1BB | -0.742702948 | 0.459657914 | -0.387769842 | 0.699615766 | -0.795150423 | 0.42986928  |
| Sep-06      | 1.858050126  | 0.066536768 | -0.275142155 | 0.784191654 | 0.752335137  | 0.454987115 |
| Sep-07      | 0.5966649    | 0.552277277 | 0.050266314  | 0.960084083 | -0.500964893 | 0.618351065 |
| SEPT7P2     | 2.73987324   | 0.007453588 | -0.714629698 | 0.477244414 | -0.342444404 | 0.733293093 |
| Sep-08      | 0.572137261  | 0.568701253 | -2.556378755 | 0.013236933 | -0.270369965 | 0.78786543  |
| Sep-09      | -0.709549109 | 0.479877034 | 1.608852301  | 0.113116799 | 2.004860143  | 0.049800753 |
| SEPW1       | 0.640123014  | 0.523771259 | 1.317606425  | 0.192852625 | 1.368231001  | 0.176681746 |
| SEPX1       | -2.691512897 | 0.008526268 | -0.585097114 | 0.560767747 | -0.971833451 | 0.335294988 |
| SERAC1      | -1.026227986 | 0.307622861 | 0.097847569  | 0.922393052 | -0.611850271 | 0.543102645 |
| SERBP1      | 1.276913885  | 0.205022907 | 1.708322382  | 0.092961176 | 1.414520521  | 0.162722159 |



|           |              |             |              |             |              |             |
|-----------|--------------|-------------|--------------|-------------|--------------|-------------|
| SERF2     | -2.106279692 | 0.038054308 | -1.887336338 | 0.0641575   | -1.54498477  | 0.12795917  |
| SERGEF    | 0.666608537  | 0.506782388 | 1.987765491  | 0.051598704 | 2.23473436   | 0.029425288 |
| SERINC1   | -0.201414097 | 0.840843951 | 0.17868639   | 0.858811007 | -0.588519478 | 0.55854006  |
| SERINC2   | -2.770393256 | 0.006841549 | 1.070853303  | 0.288702295 | 0.314795517  | 0.754081953 |
| SERINC3   | -0.949749906 | 0.344864566 | 0.446258728  | 0.657083622 | -0.431359858 | 0.667855869 |
| SERINC4   | 2.503794595  | 0.014149054 | 0.877070504  | 0.384092044 | 1.896200742  | 0.063075199 |
| SERINC5   | 2.543279029  | 0.012745356 | 1.552672302  | 0.125979446 | 1.665174071  | 0.101440142 |
| SERP1     | -0.333064125 | 0.739885449 | -1.592702326 | 0.116700795 | -1.610840804 | 0.112813627 |
| SERPINA1  | -2.530095957 | 0.013199431 | -0.301106677 | 0.764417509 | 0.049545399  | 0.960660209 |
| SERPINB1  | -2.222999412 | 0.028802162 | 0.498599195  | 0.619960616 | 0.114943227  | 0.908899548 |
| SERPINB10 | -1.401421607 | 0.164637682 | 0.707948976  | 0.481832097 | 0.046304221  | 0.963231816 |
| SERPINB2  | -1.282889294 | 0.202930713 | 1.459094763  | 0.149971479 | 0.434946915  | 0.665265565 |
| SERPINB6  | -0.435079909 | 0.66457949  | 0.982116471  | 0.330150039 | 2.942777247  | 0.004718896 |
| SERPINB8  | -0.232422089 | 0.816754894 | 0.973863887  | 0.33419655  | 0.339404501  | 0.73556928  |
| SERPINB9  | 0.957357627  | 0.341033897 | -0.590480558 | 0.557178387 | -1.848376968 | 0.069808084 |
| SERPIND1  | 0.255006046  | 0.799318975 | 1.725185418  | 0.089856515 | 1.113119433  | 0.270392495 |
| SERPINE1  | -1.953776175 | 0.053933552 | 0.688924845  | 0.493636495 | 0.526645416  | 0.600511025 |
| SERPINE2  | 0.395969004  | 0.693095217 | 0.421172495  | 0.675196706 | 2.556252909  | 0.013308393 |
| SERPINF1  | 3.752992766  | 0.000314345 | 0.963242269  | 0.339452773 | 1.663878034  | 0.101700096 |
| SERPINF2  | 0.872995917  | 0.385063273 | -0.549172963 | 0.585009681 | -0.022069922 | 0.982470302 |
| SERPING1  | -2.207310369 | 0.02991851  | 0.688460378  | 0.49392667  | -1.066922446 | 0.290565798 |
| SERPINH1  | 1.543841137  | 0.126248789 | 0.417171749  | 0.678103663 | 0.774473156  | 0.441895087 |
| SERPINI1  | 1.209228341  | 0.229843958 | -0.856497917 | 0.395271921 | -0.851058168 | 0.398346388 |
| SERTAD1   | 0.005770912  | 0.995408687 | 0.954355988  | 0.343891827 | 1.086207399  | 0.28202131  |
| SERTAD2   | -0.482749672 | 0.630483384 | 0.881688791  | 0.381609852 | 0.1079879424 | 0.284805518 |
| SERTAD3   | -2.764540626 | 0.006955232 | 0.067731811  | 0.946233709 | -1.167334119 | 0.248001237 |
| SESN1     | 3.588476733  | 0.00054862  | -0.371690022 | 0.711487575 | 0.275488655  | 0.783950574 |
| SESN2     | -1.910962411 | 0.059295255 | 0.750956166  | 0.455736307 | 0.789843604  | 0.432936947 |
| SESN3     | -4.788206642 | 6.83E-06    | 0.244380455  | 0.807804666 | -0.588347042 | 0.558654967 |
| SESTD1    | -1.138825236 | 0.257895411 | -0.088701927 | 0.929626509 | -1.385809148 | 0.171276381 |
| SET       | -0.030858743 | 0.975452722 | 2.141586215  | 0.03646898  | 2.456984219  | 0.017121179 |
| SETBP1    | 1.333624655  | 0.185800465 | -1.233718191 | 0.222318736 | -1.71025211  | 0.092731528 |
| SETD1A    | 1.339792607  | 0.183794345 | -0.18205211  | 0.856181055 | 0.091958152  | 0.927058084 |
| SETD1B    | -0.50695867  | 0.613463602 | -1.148215707 | 0.255626095 | -1.153133406 | 0.25373338  |
| SETD2     | -1.678926333 | 0.096746994 | 0.388609219  | 0.698998083 | 0.177690841  | 0.859604273 |
| SETD3     | -0.18961634  | 0.850050518 | 1.631804482  | 0.108176939 | 1.650680886  | 0.104378252 |
| SETD4     | 0.983863617  | 0.327904922 | 1.058690738  | 0.294160517 | 2.157680161  | 0.035238786 |
| SETD5     | 1.578417477  | 0.118091145 | -0.402670435 | 0.688681367 | 0.099542836  | 0.921061279 |
| SETD6     | 1.770748108  | 0.080097546 | -1.288034537 | 0.202884738 | 0.372847559  | 0.710663527 |
| SETD7     | 0.564527865  | 0.573844436 | -1.163454573 | 0.24944245  | -1.060812379 | 0.293309892 |
| SETD8     | -0.814246124 | 0.417722308 | 0.858937873  | 0.393935505 | 1.385235229  | 0.171450833 |
| SETDB1    | -0.220128794 | 0.826285449 | 0.935166256  | 0.353607005 | 1.534582225  | 0.130493716 |
| SETDB2    | 1.421093769  | 0.158856267 | -0.408106809 | 0.684708444 | -0.096684499 | 0.923320691 |
| SETMAR    | 1.620897522  | 0.108650801 | -1.039140413 | 0.303082139 | 0.954025338  | 0.344153726 |
| SETX      | -1.391246059 | 0.167690733 | 0.883461664  | 0.380659674 | -0.213950019 | 0.831359869 |
| SEZ6      | 0.468383674  | 0.640679105 | 0.394282872  | 0.694828322 | -0.564415008 | 0.574716092 |
| SEZ6L     | -1.460559342 | 0.147730665 | 0.56147772   | 0.576650185 | 0.904680897  | 0.369493906 |
| SF1       | -0.259881069 | 0.795568212 | -1.60899941  | 0.113084567 | -0.877427956 | 0.383987357 |
| SF3A1     | -1.878857643 | 0.063605162 | 0.642594829  | 0.523036864 | 0.410121198  | 0.683275282 |
| SF3A2     | -0.464861513 | 0.64318949  | -0.738205393 | 0.463386974 | -0.609296587 | 0.544781667 |
| SF3A3     | 0.735566444  | 0.463968753 | 2.323070921  | 0.023728862 | 3.22830995   | 0.002079835 |
| SF3B1     | 1.414242495  | 0.160856897 | -0.56311139  | 0.575544677 | -1.361515391 | 0.178780955 |
| SF3B14    | -0.080456212 | 0.936058812 | -0.765746243 | 0.446954068 | -0.617815511 | 0.539190895 |
| SF3B2     | -0.999388193 | 0.320372255 | 2.382251078  | 0.020530364 | 2.587871736  | 0.012266663 |
| SF3B3     | 0.014146367  | 0.988745529 | 2.651305051  | 0.010338126 | 3.075191697  | 0.003244617 |
| SF3B4     | -1.80740506  | 0.074147991 | -1.307560913 | 0.196217717 | -1.061281832 | 0.293098424 |
| SF3B5     | -1.049598985 | 0.296803168 | -1.76947556  | 0.082108237 | -1.124569981 | 0.265548438 |
| SFI1      | 2.225830445  | 0.028604653 | 0.827807131  | 0.411196619 | 2.181061983  | 0.033376474 |
| SFMBT1    | 1.655073854  | 0.101504967 | 2.120386118  | 0.038292018 | 2.411674139  | 0.019168499 |
| SFMBT2    | 1.74184381   | 0.085062411 | 0.1869468    | 0.852359307 | -0.017361986 | 0.986209287 |
| SFN       | -1.919805818 | 0.05815231  | 0.947962136  | 0.347109236 | 0.87321434   | 0.386259699 |
| SFPQ      | 1.541103785  | 0.126913237 | 2.473505743  | 0.016350645 | 1.701426808  | 0.094386221 |
| SFR1      | 1.447576291  | 0.151321811 | 0.423458707  | 0.673537762 | 0.794861225  | 0.43003612  |
| SFRP1     | -1.294382074 | 0.198951247 | 1.897685396  | 0.062753555 | 0.024181663  | 0.980793306 |
| SFRP2     | -1.684593008 | 0.095643724 | 2.033535872  | 0.046614561 | 0.672994486  | 0.50370707  |
| SFRP5     | 1.765888757  | 0.080915082 | 0.682802865  | 0.497468687 | 0.940301429  | 0.351084491 |
| SFSWAP    | 1.304722954  | 0.195420488 | 0.604783667  | 0.547698065 | 1.492969626  | 0.141034576 |
| SFT2D1    | -0.894419546 | 0.373559878 | -0.6339235   | 0.528640379 | -0.757930847 | 0.451656885 |
| SFT2D2    | -0.420337253 | 0.675273241 | -2.352979633 | 0.022060761 | -2.819895038 | 0.006623009 |
| SFT2D3    | 0.985541507  | 0.327085204 | -1.358092284 | 0.179730777 | -1.52961533  | 0.131717911 |
| SFTPB     | -0.013864612 | 0.988969671 | 1.475546047  | 0.145511904 | 1.376415479  | 0.174148951 |
| SFTPD     | 0.378659979  | 0.70586086  | -0.350450231 | 0.727279293 | 0.609433595  | 0.544691518 |

|          |              |             |              |             |              |             |
|----------|--------------|-------------|--------------|-------------|--------------|-------------|
| SFXN1    | 2.331795251  | 0.022016798 | 0.421184895  | 0.675187704 | 1.558393449  | 0.124750349 |
| SFXN2    | 1.220188752  | 0.225683366 | 0.065888237  | 0.947694977 | 0.728535065  | 0.469309111 |
| SFXN3    | 1.263809057  | 0.209667131 | 1.334340384  | 0.187343912 | 1.402090278  | 0.166384111 |
| SFXN4    | -0.002869229 | 0.997717244 | 0.653837842  | 0.515818356 | 1.200870099  | 0.234835241 |
| SFXNS    | -1.616347105 | 0.109632064 | 1.875911566  | 0.065738189 | 1.513878982  | 0.135656887 |
| SGCA     | 0.760157002  | 0.449211413 | 1.265302477  | 0.210857912 | 0.831646828  | 0.40912576  |
| SGCB     | 1.371745846  | 0.173662145 | -1.398629452 | 0.167285818 | -1.283798681 | 0.20447684  |
| SGCD     | -1.058306733 | 0.292838885 | 0.46020508   | 0.647101727 | 0.379868385  | 0.705473955 |
| SGCE     | 0.300945175  | 0.764172799 | -1.017285807 | 0.313271755 | -2.391331086 | 0.020157187 |
| SGIP1    | -3.166571988 | 0.002125901 | 2.354403404  | 0.021984029 | 1.497539165  | 0.139845186 |
| SGK1     | -3.130229023 | 0.002376663 | -0.721320811 | 0.473630117 | -0.922570652 | 0.360172308 |
| SGK196   | 0.040954708  | 0.967425641 | -0.369060443 | 0.713435949 | -0.593500946 | 0.555225632 |
| SGK2     | 1.126915791  | 0.262870026 | -0.496915392 | 0.621140199 | -0.470792005 | 0.63961031  |
| SGK223   | 1.104940554  | 0.272225194 | -0.49596757  | 0.621804633 | -0.376204528 | 0.708180426 |
| SGK494   | 1.593395327  | 0.114690532 | -0.659446176 | 0.512237486 | 0.764640677  | 0.447682322 |
| SGMS1    | -0.488679708 | 0.6262954   | -1.422114763 | 0.160385936 | -2.141958857 | 0.036541587 |
| SGMS2    | -0.705819667 | 0.482181948 | 0.548213482  | 0.585663947 | -0.762660699 | 0.448853032 |
| SGOL1    | -0.829232499 | 0.409237346 | -0.318540392 | 0.7512273   | -0.332693777 | 0.740602488 |
| SGOL2    | 1.369000136  | 0.174515768 | 1.501393572  | 0.138716487 | 1.010917111  | 0.316385979 |
| SGPL1    | 0.57165232   | 0.569028355 | 1.557942618  | 0.124725108 | 1.484751482  | 0.143193726 |
| SGPP1    | 0.750137491  | 0.455191404 | -1.581160929 | 0.119317706 | -2.917507978 | 0.005063056 |
| SGPP2    | 0.437425733  | 0.662884236 | 0.861314892  | 0.392636263 | 0.652566116  | 0.516694768 |
| SGSH     | 2.980965707  | 0.00372358  | 0.612259623  | 0.542775656 | 0.193584586  | 0.847198685 |
| SGSM1    | 2.697998371  | 0.008374688 | -0.130489629 | 0.89663375  | -0.440298951 | 0.661408351 |
| SGSM2    | 2.001223008  | 0.048478178 | 0.552002148  | 0.583082504 | 1.78784786   | 0.079188738 |
| SGSM3    | 0.097493058  | 0.922558616 | 1.022120239  | 0.310998015 | 1.857303295  | 0.068507265 |
| SGTA     | -0.828658545 | 0.409560374 | 1.763615456  | 0.083100386 | 1.945723634  | 0.056692182 |
| SGTB     | 1.079986801  | 0.283126498 | -0.452778812 | 0.652409009 | -0.662536806 | 0.510333541 |
| SH2B1    | 2.141410002  | 0.035030855 | -2.084168936 | 0.041590631 | -1.019204128 | 0.312470787 |
| SH2B2    | -1.875513176 | 0.064068917 | -1.023122839 | 0.310527872 | -2.049871432 | 0.045050609 |
| SH2B3    | -2.057698806 | 0.042605714 | -1.618949475 | 0.110921614 | -1.950836597 | 0.056065743 |
| SH2D1A   | 1.594523444  | 0.114437608 | -1.24168925  | 0.219384004 | -1.050026153 | 0.298197565 |
| SH2D1B   | 0.445359313  | 0.657163927 | -1.695411313 | 0.095397511 | -1.61754741  | 0.111356185 |
| SH2D2A   | -2.530334287 | 0.013191094 | -0.736404568 | 0.464473388 | 0.377918864  | 0.706913581 |
| SH2D3A   | 1.927410433  | 0.057184414 | -1.34959515  | 0.182426779 | -0.934698227 | 0.353940123 |
| SH2D3C   | -1.054521448 | 0.294557706 | -1.991123926 | 0.051218025 | -1.621136218 | 0.110582575 |
| SH3BGR   | -0.794196464 | 0.429237419 | 0.313614135  | 0.754947105 | 0.65501837   | 0.515126345 |
| SH3BGRL  | 0.135042701  | 0.892889383 | -1.246198956 | 0.217736342 | -1.688120116 | 0.096927026 |
| SH3BGRL2 | -5.74024367  | 1.35E-07    | 1.077259545  | 0.285855688 | -0.271042022 | 0.787351114 |
| SH3BGRL3 | -3.052386008 | 0.003009161 | -2.233858869 | 0.029390239 | -2.106442593 | 0.039640841 |
| SH3BP1   | -0.568438797 | 0.571198242 | -0.250853583 | 0.802820065 | 0.125482272  | 0.900589274 |
| SH3BP2   | -0.671885878 | 0.503432829 | -1.33783625  | 0.186208297 | -1.290253425 | 0.202242803 |
| SH3BP4   | 0.991622246  | 0.324125866 | 2.194447399  | 0.032250255 | 0.829683411  | 0.410225913 |
| SH3BP5   | 0.219870673  | 0.826485846 | 1.135950759  | 0.260681799 | 0.79847219   | 0.427955709 |
| SH3BP5L  | -2.109062912 | 0.037806798 | 0.853151482  | 0.397109403 | 0.378605134  | 0.706406682 |
| SH3D21   | -2.104217999 | 0.038238556 | -0.22043318  | 0.826313304 | 0.262909225  | 0.793581367 |
| SH3GL1   | -1.468269988 | 0.145629449 | -1.441051829 | 0.154984754 | -1.76758005  | 0.082556218 |
| SH3GL1P1 | 1.056150828  | 0.293816996 | -1.6766023   | 0.099040464 | -1.707293497 | 0.093283567 |
| SH3GLB1  | -0.268156199 | 0.789212495 | -0.867543936 | 0.38924423  | -1.090152321 | 0.280295228 |
| SH3GLB2  | -0.607419022 | 0.545151623 | 1.033713119  | 0.305591245 | 0.81579105   | 0.418061613 |
| SH3KBP1  | -1.671397411 | 0.098228829 | 0.522923478  | 0.603033417 | 0.648682471  | 0.519183876 |
| SH3PXD2A | 3.997476486  | 0.000133609 | 0.700595929  | 0.486375864 | 0.904840105  | 0.369410276 |
| SH3PXD2B | -3.052078841 | 0.003011941 | 2.958936124  | 0.004473606 | 0.985375366  | 0.328660323 |
| SH3RF1   | 5.558469654  | 2.92E-07    | -0.303972318 | 0.762244447 | -0.334561221 | 0.739200703 |
| SH3RF2   | 0.446856015  | 0.656087042 | -0.684818078 | 0.496205427 | -1.475658819 | 0.145612894 |
| SH3RF3   | -0.563690068 | 0.574412069 | 0.373267083  | 0.710319985 | -0.01132538  | 0.99100393  |
| SH3TC1   | 0.657778086  | 0.512413668 | 1.195339778  | 0.236852821 | 1.557068458  | 0.125064535 |
| SH3TC2   | -4.268793521 | 4.98E-05    | 2.373481018  | 0.020978609 | 1.142934356  | 0.257908276 |
| SH3YL1   | 1.656571749  | 0.101200698 | 0.087504311  | 0.930574181 | -0.707441951 | 0.482213396 |
| SHANK1   | 1.606280909  | 0.111828082 | -2.5655171   | 0.012928776 | -1.331160029 | 0.188507844 |
| SHARPIN  | -2.092279899 | 0.039320669 | -0.652481586 | 0.516686631 | -1.205678177 | 0.232990056 |
| SHB      | -1.772619952 | 0.079784455 | 0.539811985  | 0.591407728 | -0.236431561 | 0.813956861 |
| SHC1     | -0.077616416 | 0.938311027 | -0.084626078 | 0.932852133 | -0.050096344 | 0.960223121 |
| SHC2     | 0.837219616  | 0.404758136 | 1.428973333  | 0.158413127 | -0.882084452 | 0.38148597  |
| SHCBP1   | 1.88087354   | 0.063326996 | 0.545838593  | 0.587284871 | 0.304637118  | 0.761767079 |
| SHD      | 2.365825063  | 0.02020666  | -1.447255702 | 0.153246459 | -0.337071239 | 0.737317976 |
| SHE      | -0.828636488 | 0.40957279  | 1.677298296  | 0.098903661 | 1.646593712  | 0.105219252 |
| SHF      | -1.825252541 | 0.071387026 | -0.16742248  | 0.867624088 | 0.63227081   | 0.529772227 |
| SHFM1    | 0.847316608  | 0.399138575 | -1.768162565 | 0.082329674 | -0.791405039 | 0.432032994 |
| SHISA4   | -3.360224288 | 0.001157196 | -0.940019519 | 0.351133277 | -2.144289813 | 0.036345802 |
| SHISA5   | -2.694267388 | 0.008461587 | 0.398855607  | 0.691474537 | -1.147618069 | 0.255985001 |
| SHISA7   | -1.825385152 | 0.071366836 | -0.363241117 | 0.71775456  | -0.306713093 | 0.760194552 |

|          |              |             |              |             |              |             |
|----------|--------------|-------------|--------------|-------------|--------------|-------------|
| SHISA8   | 0.248452927  | 0.804368253 | -2.337642667 | 0.02290261  | -2.61018539  | 0.011576751 |
| SHISA9   | -0.138288539 | 0.890331271 | 1.076976853  | 0.28598089  | 0.315606269  | 0.753469659 |
| SHKBP1   | -1.847053919 | 0.068131231 | 0.403412564  | 0.688138493 | -0.24860427  | 0.804572549 |
| SHMT1    | 0.347033458  | 0.729402421 | 2.038107767  | 0.046140332 | 2.912300194  | 0.00513682  |
| SHMT2    | -0.581432934 | 0.562448888 | 2.31194928   | 0.024377232 | 2.237411011  | 0.029239529 |
| SHOC2    | -1.201378056 | 0.232857865 | -0.064399874 | 0.948874825 | -1.278517632 | 0.206318321 |
| SHPK     | 0.697914741  | 0.487087628 | 1.915706673  | 0.060371011 | 1.72819373   | 0.089441277 |
| SHPRH    | 1.080076365  | 0.28308684  | -0.429951027 | 0.668835641 | -1.383092498 | 0.17210336  |
| SHQ1     | 2.942496076  | 0.004170501 | 2.597231617  | 0.011909182 | 3.327761868  | 0.001548153 |
| SHROOM1  | -1.693101729 | 0.094006388 | -0.825199765 | 0.412662958 | -0.744020724 | 0.459961488 |
| SHROOM4  | -3.350669647 | 0.0011931   | 1.888740259  | 0.063965498 | -0.060007016 | 0.952362787 |
| SIAE     | 0.958017592  | 0.340702901 | -0.932815244 | 0.35480938  | 0.523332951  | 0.602798711 |
| SIAH1    | -0.447920565 | 0.655321535 | -1.170877053 | 0.246469703 | -1.090961442 | 0.279942114 |
| SIAH2    | -3.087971341 | 0.002702774 | 0.081588041  | 0.935257173 | -0.586088046 | 0.560161395 |
| SIDT1    | 1.189747103  | 0.237375522 | -1.611388015 | 0.112562243 | -0.006914806 | 0.994507298 |
| SIDT2    | -0.555611457 | 0.579899404 | 1.242344757  | 0.21914394  | 0.436909024  | 0.663850409 |
| SIGIRR   | -0.368895062 | 0.713100233 | -0.51796482  | 0.60646679  | 0.273622604  | 0.785377116 |
| SIGLEC1  | -1.112816865 | 0.268845828 | 1.80981479   | 0.075542902 | -0.732303569 | 0.467024442 |
| SIGLEC10 | -1.949012354 | 0.054509036 | -0.919232251 | 0.36180789  | -0.611821189 | 0.54312175  |
| SIGLEC11 | -0.628268094 | 0.531470641 | 0.189461913  | 0.850396897 | -0.181239163 | 0.856831489 |
| SIGLEC12 | -4.912685335 | 4.17E-06    | 1.083492789  | 0.283104693 | 0.283844331  | 0.77757211  |
| SIGLEC14 | -2.655770277 | 0.009407326 | 0.582008527  | 0.562832207 | 0.092870563  | 0.926336457 |
| SIGLEC15 | 0.075500537  | 0.939989437 | -0.747414425 | 0.457854062 | -1.348348518 | 0.182951957 |
| SIGLEC16 | -2.18871272  | 0.031290672 | 1.985105106  | 0.051901981 | 2.394655974  | 0.019992533 |
| SIGLEC5  | -3.175933137 | 0.00206543  | 1.156003564  | 0.252452399 | 0.956943463  | 0.342691671 |
| SIGLEC6  | 0.928519774  | 0.355701467 | -0.975132542 | 0.333572361 | -0.269034727 | 0.788887551 |
| SIGLEC7  | -2.156947849 | 0.033761568 | 0.442499163  | 0.659785352 | 1.603601514  | 0.114404114 |
| SIGLEC8  | 2.620401044  | 0.010359715 | 0.289236975  | 0.773438606 | 0.264307903  | 0.792508912 |
| SIGLEC9  | -0.989926638 | 0.324949285 | 0.436941833  | 0.663787353 | 0.336883712  | 0.737458581 |
| SIGLECP3 | 0.142602166  | 0.886933413 | -3.929616913 | 0.000230487 | -2.508479408 | 0.015035164 |
| SIGMAR1  | -0.170308604 | 0.86516202  | -2.142551406 | 0.036387819 | -1.540839825 | 0.128964322 |
| SIK1     | 0.560012921  | 0.576906643 | -1.173095029 | 0.245586354 | -0.513601923 | 0.609542432 |
| SIK2     | 0.696405461  | 0.488027373 | 0.129227789  | 0.897627631 | 0.451805179  | 0.6531471   |
| SIK3     | -2.527913691 | 0.013275984 | 0.085518733  | 0.932145589 | -0.052783433 | 0.958091516 |
| SIKE1    | 0.508855801  | 0.612138602 | -1.424295365 | 0.159756648 | -1.787523764 | 0.079241671 |
| SIL1     | -0.50660339  | 0.613711881 | 4.78412149   | 1.23E-05    | 4.135534049  | 0.000119334 |
| SIM2     | 1.493406285  | 0.13894097  | 0.051412939  | 0.959174368 | 1.369525446  | 0.176279297 |
| SIN3A    | -0.235912103 | 0.814054159 | 0.683056142  | 0.497309821 | 0.707920633  | 0.481918369 |
| SIN3B    | 0.540092918  | 0.590509842 | -0.786204756 | 0.43497028  | -0.336012965 | 0.738111575 |
| SIPA1    | -1.9296615   | 0.056900531 | -0.038032758 | 0.969793082 | 0.040097568  | 0.968157356 |
| SIPA1L1  | -2.636754399 | 0.009909013 | -0.081771931 | 0.935111581 | -0.300672888 | 0.764772742 |
| SIPA1L2  | -2.309548899 | 0.023276362 | 0.25279115   | 0.80132964  | -0.865183559 | 0.390613868 |
| SIPA1L3  | 0.486980157  | 0.627494433 | -1.366367572 | 0.177134476 | -0.488121136 | 0.627361877 |
| SIRPA    | -1.140445589 | 0.257223751 | -0.21679709  | 0.829132567 | -1.10226413  | 0.275041871 |
| SIRPB1   | -2.885880168 | 0.004918806 | -0.063464233 | 0.949616582 | -1.115219369 | 0.269499507 |
| SIRPB2   | -1.806057677 | 0.074359984 | -0.126622368 | 0.899680296 | -1.490780027 | 0.141607322 |
| SIRPD    | -2.409252347 | 0.018089172 | -1.142148691 | 0.258118159 | -2.45395261  | 0.017251753 |
| SIRPG    | 0.225266583  | 0.822299049 | 0.707089231  | 0.482362144 | 1.75004719   | 0.085564657 |
| SIRT1    | 0.394746741  | 0.693993802 | -0.53102027  | 0.597446579 | -0.823150014 | 0.413899722 |
| SIRT2    | -2.018074458 | 0.046657513 | -0.956147975 | 0.342993609 | -0.393799427 | 0.695218328 |
| SIRT3    | 0.805543433  | 0.422697619 | 1.029066453  | 0.307750661 | 2.782897659  | 0.007322375 |
| SIRT4    | 2.036242064  | 0.044760539 | 1.885717248  | 0.064379534 | 2.063719547  | 0.043670382 |
| SIRT5    | 1.385758433  | 0.169355086 | 0.065613495  | 0.94791276  | 1.11832492   | 0.268182698 |
| SIRT6    | -1.111207962 | 0.269533743 | 0.303364907  | 0.762704896 | -0.142845859 | 0.8869225   |
| SIRT7    | -1.042492837 | 0.300065247 | -0.21944725  | 0.827077524 | -0.380728004 | 0.704839512 |
| SIT1     | 1.238499945  | 0.218854904 | 0.215281778  | 0.830308142 | 1.336570292  | 0.186745451 |
| SIVA1    | -0.039169428 | 0.968844858 | -0.253206568 | 0.801010187 | 0.05634295   | 0.955268311 |
| SIX4     | -1.359181082 | 0.177594532 | 2.780868008  | 0.007313694 | 1.964389896  | 0.054433766 |
| SIX5     | 0.993864692  | 0.323039017 | -1.000422217 | 0.321290792 | -0.956887329 | 0.342719757 |
| SKA1     | 0.344175748  | 0.731542829 | 1.97072061   | 0.053568411 | 2.08850081   | 0.041291847 |
| SKA2     | -0.021446224 | 0.982938705 | -0.900327282 | 0.371695206 | -0.804560462 | 0.424461684 |
| SKAP1    | 1.341325942  | 0.183298171 | 1.212239045  | 0.230370165 | 3.021214179  | 0.003784196 |
| SKAP2    | -2.130105583 | 0.035980168 | -0.717687352 | 0.475850973 | -0.826463784 | 0.412033856 |
| SKI      | -0.682266749 | 0.496878891 | -0.219270326 | 0.827214681 | -0.145709007 | 0.884672133 |
| SKIL     | -0.140147982 | 0.888866326 | 0.229161639  | 0.819555082 | -2.244914336 | 0.028724313 |
| SKIV2L   | -0.237417399 | 0.812889983 | 0.92014493   | 0.361334876 | 1.340880969  | 0.185350216 |
| SKIV2L2  | 1.792742268  | 0.076482206 | 1.021606562  | 0.311239076 | 0.853376798  | 0.397070667 |
| SKOR1    | 0.604389145  | 0.547154506 | -2.766649389 | 0.007600494 | -0.875337761 | 0.385113517 |
| SKP1     | -0.426297999 | 0.670941359 | 1.924328837  | 0.059258584 | 2.485053252  | 0.015953859 |
| SKP2     | 1.277881479  | 0.204683041 | -1.099411248 | 0.276162925 | -0.840935927 | 0.403945325 |
| SLA      | -1.541791602 | 0.126746021 | 1.845215921  | 0.070149046 | 1.916208251  | 0.060426465 |
| SLA2     | -3.739013761 | 0.000329776 | 0.425633174  | 0.671961415 | 0.797749935  | 0.428371345 |

|            |              |             |              |             |               |             |
|------------|--------------|-------------|--------------|-------------|---------------|-------------|
| SLAIN1     | 2.064750612  | 0.041917287 | -0.938224901 | 0.352046687 | -1.163968358  | 0.249351348 |
| SLAIN2     | 0.441639262  | 0.659843659 | -0.427821967 | 0.670376175 | -1.082636351  | 0.283590175 |
| SLAMF1     | 0.305086135  | 0.761027664 | 1.373399156  | 0.174950991 | 2.978723051   | 0.004266657 |
| SLAMF6     | 1.487835932  | 0.140402032 | -0.47234806  | 0.63846323  | 0.749527784   | 0.456663219 |
| SLAMF7     | 0.406395772  | 0.685447613 | -1.755869219 | 0.084427145 | -0.60388673   | 0.54834732  |
| SLAMF8     | -0.197500889 | 0.843895298 | -0.392275036 | 0.696302874 | -0.628675304  | 0.532106911 |
| SLBP       | -1.278940894 | 0.204311401 | 0.947080404  | 0.347554465 | 0.097441187   | 0.922722494 |
| SLC10A1    | -0.274802097 | 0.7841184   | 1.240925856  | 0.219663824 | 1.456085125   | 0.150929562 |
| SLC10A3    | -2.17784431  | 0.032117732 | -0.558481503 | 0.578680397 | -1.558775701  | 0.124659826 |
| SLC10A7    | 0.902663434  | 0.36919158  | -2.179491861 | 0.033397993 | -2.282593563  | 0.026256584 |
| SLC11A1    | -1.833068037 | 0.070205255 | -1.353799021 | 0.181089137 | -1.01554024   | 0.314197728 |
| SLC11A2    | 3.640375946  | 0.000461    | -0.949929129 | 0.346117351 | 0.045225491   | 0.964087788 |
| SLC12A1    | -1.757836331 | 0.082284983 | -1.036918466 | 0.304107669 | 0.492910103   | 0.623995299 |
| SLC12A2    | 0.319205476  | 0.750334222 | -0.322212673 | 0.748458218 | -0.548934689  | 0.585223288 |
| SLC12A3    | 3.067456283  | 0.00287567  | 1.118484201  | 0.268003529 | 0.564060269   | 0.57495584  |
| SLC12A4    | -0.717502023 | 0.474982356 | -1.038418926 | 0.303414879 | -1.225233265  | 0.225594265 |
| SLC12A6    | -0.280426292 | 0.779814772 | -1.483166338 | 0.143481836 | -1.395385068  | 0.168385716 |
| SLC12A7    | 0.560158581  | 0.576807728 | 1.493919429  | 0.140655187 | 1.663738071   | 0.101728202 |
| SLC12A9    | 0.520986574  | 0.60369682  | -0.417836131 | 0.677620578 | -0.11086288   | 0.912119797 |
| SLC13A4    | -0.929319633 | 0.355289259 | 1.117258421  | 0.268522751 | 1.354033128   | 0.181142188 |
| SLC14A1    | -0.036051739 | 0.971323516 | -1.166675643 | 0.248149249 | -0.346662117  | 0.730138986 |
| SLC14A2    | -0.476183436 | 0.635134798 | 1.210800985  | 0.230916723 | 0.960218832   | 0.341055491 |
| SLC15A2    | 0.787505111  | 0.433121852 | -0.980703254 | 0.330840666 | -0.234409606  | 0.815518346 |
| SLC15A3    | -2.617379695 | 0.010444987 | -0.698049755 | 0.487954781 | -0.997045729  | 0.323013185 |
| SLC15A4    | -1.642465763 | 0.104095538 | 0.321281008  | 0.749160426 | -0.9133101836 | 0.364982824 |
| SLC16A1    | 0.357713963  | 0.721421878 | 2.864164431  | 0.005824415 | 3.811185017   | 0.000345096 |
| SLC16A10   | 1.811088059  | 0.073571081 | 0.340166038  | 0.734968989 | 0.90424305    | 0.369723964 |
| SLC16A11   | 0.001165674  | 0.99907259  | -2.65644065  | 0.010199214 | -0.930636474  | 0.356019563 |
| SLC16A13   | -0.490727746 | 0.624851843 | -0.249592019 | 0.803790888 | 0.614860019   | 0.541127167 |
| SLC16A14   | -0.150193618 | 0.880958771 | -0.339165303 | 0.735718731 | -0.314025902  | 0.754663325 |
| SLC16A3    | -3.240118111 | 0.001692119 | -0.839614854 | 0.404595983 | -1.764773942  | 0.083031713 |
| SLC16A4    | 1.801621155  | 0.075061577 | -0.62655349  | 0.533426299 | -0.704218476  | 0.484202754 |
| SLC16A5    | -1.724841795 | 0.088099265 | -1.298804782 | 0.199186732 | -0.810163639  | 0.421261231 |
| SLC16A6    | -1.903929052 | 0.060217751 | -1.669874315 | 0.100370906 | -2.166354359  | 0.034537537 |
| SLC16A7    | 0.387839937  | 0.699079749 | -0.955218761 | 0.343459177 | -1.730672951  | 0.088994305 |
| SLC17A5    | -0.759848359 | 0.449394942 | -0.665746535 | 0.508230686 | -0.280699271  | 0.779971172 |
| SLC17A9    | 1.753951933  | 0.082952617 | -1.399360592 | 0.167067613 | -1.121076329  | 0.267019849 |
| SLC18A1    | -0.134026526 | 0.893690487 | -1.535776095 | 0.130068841 | -1.795021753  | 0.078024622 |
| SLC18A2    | -1.666292143 | 0.099244095 | -1.058810946 | 0.294106226 | -1.752028405  | 0.085220206 |
| SLC19A1    | -1.428533713 | 0.156710947 | -1.269185442 | 0.209479745 | -1.0572380027 | 0.121472221 |
| SLC19A2    | 0.532112297  | 0.596001573 | -2.421547286 | 0.018625398 | -2.295114608  | 0.025479214 |
| SLC1A2     | 1.206852312  | 0.230753177 | 2.220820892  | 0.030310582 | 1.801825702   | 0.076933789 |
| SLC1A3     | 2.841484153  | 0.005589966 | 0.846566791  | 0.400740372 | -0.188927126  | 0.850830107 |
| SLC1A4     | 1.45648706   | 0.148849867 | 2.087989545  | 0.041231375 | 2.422954441   | 0.018639228 |
| SLC1A5     | 0.004732071  | 0.996235178 | -0.084439758 | 0.932999614 | 0.009479296   | 0.992470277 |
| SLC1A7     | 0.214898584  | 0.830348243 | -0.051578591 | 0.959042946 | -0.210391128  | 0.834122856 |
| SLC20A1    | 1.835204802  | 0.069885015 | 0.886525867  | 0.379020924 | -0.119380353  | 0.905399472 |
| SLC20A2    | 2.724942816  | 0.007770841 | 0.800590521  | 0.426658804 | 1.363012121   | 0.178311455 |
| SLC22A1    | -4.31145022  | 4.25E-05    | 0.643602198  | 0.522387924 | -0.192703008  | 0.847885799 |
| SLC22A15   | -1.371704751 | 0.173674898 | -0.386749139 | 0.700367158 | -2.053245577  | 0.044710876 |
| SLC22A16   | -0.9343996   | 0.352678456 | 1.052951976  | 0.296760418 | 1.026939095   | 0.308846103 |
| SLC22A17   | 3.420246995  | 0.000953871 | 0.380300101  | 0.705121558 | 0.594498163   | 0.554563319 |
| SLC22A18   | -1.769815176 | 0.080253971 | -0.084750473 | 0.93275367  | -0.052505608  | 0.958311894 |
| SLC22A18AS | -2.398585322 | 0.018590117 | 1.450593943  | 0.152317417 | 0.840757727   | 0.404044324 |
| SLC22A20   | 0.75601705   | 0.451676766 | 0.418973342  | 0.676794007 | -0.474407705  | 0.637046198 |
| SLC22A23   | 3.345079521  | 0.001214589 | 1.159357218  | 0.25109444  | 1.945786278   | 0.056684471 |
| SLC22A3    | 2.320887987  | 0.022626617 | -1.291920413 | 0.201544633 | 0.048892476   | 0.961178217 |
| SLC22A31   | -0.991230392 | 0.324316035 | 0.281667079  | 0.77920834  | 1.273537704   | 0.208066104 |
| SLC22A4    | -1.292776742 | 0.199503594 | -0.292242559 | 0.771151305 | -1.62224256   | 0.11034497  |
| SLC22A5    | 2.500293443  | 0.014279986 | -0.836691161 | 0.406224271 | -2.02202745   | 0.047940428 |
| SLC23A1    | 0.68654481   | 0.494191467 | -1.269310082 | 0.209435618 | 0.218864735   | 0.827547792 |
| SLC23A2    | 0.812754046  | 0.418572825 | -0.508472727 | 0.613064    | -0.676922889  | 0.501229954 |
| SLC23A3    | 1.294396345  | 0.198946342 | -0.238957089 | 0.811987086 | -0.033746681  | 0.973198649 |
| SLC24A1    | 1.641716636  | 0.104251127 | -0.842390857 | 0.403053661 | 0.605619963   | 0.547203653 |
| SLC24A3    | -2.633795243 | 0.009989228 | 0.500780516  | 0.618433988 | -0.208678622  | 0.835453133 |
| SLC24A4    | -1.349814427 | 0.180569623 | 0.801291441  | 0.426256284 | 2.04822871    | 0.045216817 |
| SLC24A6    | 1.004965959  | 0.317694191 | 2.82029598   | 0.00656972  | 3.561464862   | 0.000759235 |
| SLC25A1    | 0.643296104  | 0.521720356 | 2.344548005  | 0.022520093 | 2.210704715   | 0.031140157 |
| SLC25A10   | 0.855225467  | 0.394770371 | 0.563810846  | 0.575071667 | 1.572301902   | 0.121490338 |
| SLC25A11   | -1.877981969 | 0.063726313 | 0.17447608   | 0.862103177 | 0.229227378   | 0.819523823 |
| SLC25A12   | 2.129852404  | 0.036001682 | 0.090635342  | 0.928096818 | 0.613623104   | 0.541938582 |
| SLC25A13   | 0.266335719  | 0.790609508 | 0.167009856  | 0.86794726  | -0.460669581  | 0.646812207 |

|          |              |             |              |             |              |             |
|----------|--------------|-------------|--------------|-------------|--------------|-------------|
| SLC25A14 | 0.557564962  | 0.578570211 | 0.90155422   | 0.371048343 | -0.472294455 | 0.638544293 |
| SLC25A15 | 0.807524603  | 0.421561895 | -0.204652772 | 0.83856491  | 1.144021153  | 0.25746109  |
| SLC25A16 | 1.871140118  | 0.064679581 | -1.827001454 | 0.072882359 | -1.823342645 | 0.073567803 |
| SLC25A17 | 2.400331922  | 0.018507257 | 0.857033024  | 0.394978591 | 2.239365022  | 0.029104577 |
| SLC25A19 | 1.458040208  | 0.148422234 | -0.209640353 | 0.834688153 | -1.026850862 | 0.308887288 |
| SLC25A20 | -0.717528765 | 0.474965945 | 4.47594573   | 3.65E-05    | 2.807139826  | 0.006856843 |
| SLC25A22 | 0.43625949   | 0.663726824 | -0.957476121 | 0.342328881 | -0.301127695 | 0.764427724 |
| SLC25A23 | 0.489433407  | 0.625763987 | 0.295826942  | 0.768426196 | 0.835168174  | 0.407157181 |
| SLC25A24 | 0.525263068  | 0.600733554 | -0.321982541 | 0.748631652 | -1.944527106 | 0.056839641 |
| SLC25A25 | 1.467604999  | 0.145809742 | -0.986299849 | 0.328111277 | 0.572918248  | 0.568983808 |
| SLC25A26 | 1.80471214   | 0.07457219  | 1.768984993  | 0.082190913 | 2.745538364  | 0.008097064 |
| SLC25A28 | -1.811214627 | 0.073551321 | -3.023847096 | 0.003723193 | -1.564459486 | 0.123320013 |
| SLC25A29 | 1.978750236  | 0.051000352 | -2.454918504 | 0.017133929 | -1.058456377 | 0.294372752 |
| SLC25A3  | -0.654582745 | 0.514459522 | 2.506365267  | 0.015044525 | 3.46911328   | 0.001009215 |
| SLC25A30 | 0.540753884  | 0.590056074 | 0.392611192  | 0.696055919 | -0.027941189 | 0.977807977 |
| SLC25A32 | -0.30392527  | 0.76190896  | -0.673117713 | 0.503564384 | -0.774303348 | 0.441994659 |
| SLC25A33 | -0.310032217 | 0.757276286 | 1.259958002  | 0.212765798 | 1.127910573  | 0.264146862 |
| SLC25A34 | -0.105484824 | 0.916233416 | -0.596925806 | 0.552896238 | 0.211169114  | 0.833518677 |
| SLC25A35 | 0.676059563  | 0.500792213 | 0.105035324  | 0.916712713 | 0.203337966  | 0.83960485  |
| SLC25A36 | 1.629766163  | 0.106758664 | -1.115378648 | 0.269320372 | -1.717742747 | 0.091345907 |
| SLC25A37 | -2.273152647 | 0.025474579 | -2.266893835 | 0.027167897 | -3.052147002 | 0.003465529 |
| SLC25A38 | 0.5567861    | 0.579099985 | 0.973553006  | 0.334349623 | 2.050984641  | 0.044938277 |
| SLC25A39 | -2.654084947 | 0.00945084  | 1.0675892    | 0.290160211 | 0.510969477  | 0.611372651 |
| SLC25A4  | 1.093030714  | 0.277391143 | -1.130619311 | 0.262901455 | 0.164941547  | 0.869581458 |
| SLC25A40 | 0.197099733  | 0.844208237 | -0.980679572 | 0.330852248 | -2.111820535 | 0.039157301 |
| SLC25A42 | 2.947364485  | 0.004111326 | -0.175315581 | 0.861446548 | 1.374203945  | 0.074830578 |
| SLC25A43 | 1.286734133  | 0.201592893 | -1.438261667 | 0.155771537 | -1.571321229 | 0.121717934 |
| SLC25A44 | -2.446295897 | 0.01644164  | 0.970014945  | 0.336094987 | 0.771729771  | 0.443505361 |
| SLC25A45 | 0.672058888  | 0.50332322  | -0.655408836 | 0.514813948 | 1.296141444  | 0.20022089  |
| SLC25A46 | 1.363814981  | 0.176136484 | -1.584557193 | 0.118542778 | -2.187333804 | 0.032891878 |
| SLC25A5  | -1.05450775  | 0.294563939 | 1.434551749  | 0.156822489 | 1.615393265  | 0.111822639 |
| SLC25A6  | -0.743768233 | 0.459016386 | -2.366357024 | 0.021349143 | -1.885851574 | 0.064483541 |
| SLC26A1  | 1.988487347  | 0.049894125 | -1.513893871 | 0.135521337 | -1.404561019 | 0.165651208 |
| SLC26A11 | 2.959750769  | 0.003964249 | 0.067822482  | 0.946161846 | 0.116114091  | 0.907975772 |
| SLC26A2  | 1.717909     | 0.089362848 | 0.164700056  | 0.86975674  | -0.274014535 | 0.785077434 |
| SLC26A5  | -0.919153656 | 0.360551119 | -0.136320915 | 0.892042956 | 0.850946208  | 0.398408053 |
| SLC26A6  | 1.221685534  | 0.225119456 | 1.37770283   | 0.173624796 | 2.194480416  | 0.03234724  |
| SLC26A8  | -1.40070043  | 0.164852651 | -0.344646612 | 0.731615368 | -1.420442112 | 0.160999754 |
| SLC27A1  | 0.258412141  | 0.79669788  | 0.94225533   | 0.349997471 | 1.891297174  | 0.063739202 |
| SLC27A2  | -0.582767074 | 0.561554309 | 2.975392056  | 0.004271076 | -0.096817136 | 0.923215832 |
| SLC27A3  | 1.119856231  | 0.265850446 | -2.269572851 | 0.02699437  | -2.636318082 | 0.010813812 |
| SLC27A4  | -0.770136994 | 0.443300329 | 1.364525567  | 0.177709895 | 1.581030848  | 0.119479534 |
| SLC27A5  | -1.532456362 | 0.129030464 | -0.542309459 | 0.589697527 | -0.615070397 | 0.540989222 |
| SLC28A2  | -0.038675413 | 0.969237595 | 2.574670275  | 0.01262666  | 1.382083256  | 0.172411364 |
| SLC28A3  | 0.640203801  | 0.52371899  | -1.08638229  | 0.281835698 | -0.471713923 | 0.638956101 |
| SLC29A1  | 1.023359593  | 0.308968868 | -1.028725517 | 0.307909509 | -1.464626914 | 0.148591018 |
| SLC29A2  | 2.701519239  | 0.008293428 | -0.60830939  | 0.545373796 | 1.152967242  | 0.253801009 |
| SLC29A3  | -1.160782825 | 0.248898571 | 0.345258392  | 0.73115787  | -0.027853494 | 0.97787761  |
| SLC29A4  | 0.99293226   | 0.323490646 | 0.301792102  | 0.763897566 | 0.592405785  | 0.555953453 |
| SLC2A1   | -1.715091363 | 0.089880621 | -1.001707287 | 0.32067491  | -1.142759392 | 0.25798032  |
| SLC2A11  | 0.70110187   | 0.48510645  | -0.516796723 | 0.607276884 | 0.954909803  | 0.343710156 |
| SLC2A12  | 0.222442309  | 0.824489827 | -0.355874757 | 0.723234355 | -0.183827199 | 0.854810247 |
| SLC2A13  | 0.92666155   | 0.356660287 | -1.222536823 | 0.226483884 | -2.813718484 | 0.006735306 |
| SLC2A14  | 0.151291807  | 0.880095034 | -0.048066876 | 0.961829233 | -1.353376265 | 0.181350609 |
| SLC2A3   | -2.077377459 | 0.040708512 | 0.88893438   | 0.377735971 | 0.038934637  | 0.969080391 |
| SLC2A4RG | 1.493244467  | 0.138983245 | -1.910067383 | 0.061108157 | -1.013448928 | 0.315186333 |
| SLC2A5   | -1.145085916 | 0.255307103 | 1.296455677  | 0.199988966 | 1.900713101  | 0.062469367 |
| SLC2A6   | -0.065160237 | 0.948195591 | -0.473852202 | 0.63739665  | -0.885715437 | 0.379542612 |
| SLC2A8   | 0.044039649  | 0.964973504 | -1.471821666 | 0.146512267 | -0.749046119 | 0.456951151 |
| SLC2A9   | -1.342101327 | 0.183047648 | 1.24803733   | 0.217067301 | 0.728900123  | 0.469087517 |
| SLC30A1  | -0.944651569 | 0.347447264 | 0.703511609  | 0.4845713   | -1.454121343 | 0.151471251 |
| SLC30A4  | -0.442686801 | 0.659088615 | -1.238996432 | 0.22037222  | -1.194971387 | 0.23711346  |
| SLC30A5  | 1.426870098  | 0.157188703 | 0.302793832  | 0.76313788  | -0.26987582  | 0.788243654 |
| SLC30A6  | -0.117533498 | 0.906707634 | -0.779631839 | 0.438799539 | -1.357335333 | 0.180097172 |
| SLC30A7  | 1.100090238  | 0.2743209   | -1.038435156 | 0.303407391 | -1.831472901 | 0.072328554 |
| SLC30A9  | 0.399542051  | 0.690470901 | -0.620979176 | 0.53706314  | -1.196501158 | 0.236521092 |
| SLC31A1  | -4.453019697 | 2.50E-05    | 0.369710652  | 0.712954    | 0.450352384  | 0.654187801 |
| SLC31A2  | -2.773995991 | 0.006772416 | -1.362906934 | 0.178216713 | -2.230615446 | 0.029713175 |
| SLC33A1  | 0.811232937  | 0.419440956 | -1.128882724 | 0.263627336 | -2.776604785 | 0.007447891 |
| SLC34A3  | 0.053791471  | 0.957224367 | -1.22397756  | 0.225944014 | -1.080100139 | 0.284708087 |
| SLC35A1  | 1.275239716  | 0.205611942 | -1.205366297 | 0.232990805 | -1.084736865 | 0.282666625 |
| SLC35A2  | -1.878210043 | 0.06369474  | -0.673483692 | 0.503333309 | -0.604234447 | 0.548117782 |

|          |              |             |              |             |              |             |
|----------|--------------|-------------|--------------|-------------|--------------|-------------|
| SLC35A3  | 0.974342245  | 0.332582158 | -0.923526036 | 0.35958602  | -2.62971721  | 0.011002067 |
| SLC35A4  | -1.145286185 | 0.255224611 | 0.506232149  | 0.614625983 | 0.909724547  | 0.366850409 |
| SLC35A5  | -1.553044344 | 0.124035046 | -1.513220653 | 0.135691916 | -2.329365633 | 0.02345621  |
| SLC35B1  | -0.916708444 | 0.361824134 | -0.959173005 | 0.341480833 | -0.464389216 | 0.644161766 |
| SLC35B2  | 2.404097083  | 0.018329752 | 0.061847177  | 0.950898656 | 0.410689538  | 0.682860854 |
| SLC35B3  | -0.177275283 | 0.859703347 | -1.302710509 | 0.197858248 | -1.759775742 | 0.083884301 |
| SLC35B4  | 1.069664571  | 0.287722692 | -0.085519446 | 0.932145024 | 0.980170928  | 0.331199752 |
| SLC35C1  | -0.480362866 | 0.632172448 | 0.262870144  | 0.793588709 | 0.638965974  | 0.525439117 |
| SLC35C2  | -0.715202177 | 0.476394941 | 1.286226898  | 0.203510396 | 2.875106567  | 0.005693329 |
| SLC35D1  | 1.059115053  | 0.292472732 | 0.351902264  | 0.726195825 | 0.343753334  | 0.732313746 |
| SLC35D2  | -1.466296305 | 0.146165065 | 1.808089377  | 0.075814439 | 1.838942275  | 0.071205554 |
| SLC35E1  | -1.320636353 | 0.190078678 | 1.443847478  | 0.154199534 | 1.446501325  | 0.153587562 |
| SLC35E2  | 2.351856089  | 0.020933089 | 0.674841581  | 0.502476453 | 0.566977119  | 0.572985947 |
| SLC35E2B | 1.605580918  | 0.111982094 | 0.88542377   | 0.379609817 | 1.624227415  | 0.109919729 |
| SLC35E3  | -1.159297247 | 0.249500137 | -1.87533919  | 0.06581824  | -2.258387411 | 0.027819302 |
| SLC35E4  | -0.077770686 | 0.938188663 | -0.713403316 | 0.478476987 | -0.239598031 | 0.811513033 |
| SLC35F2  | 1.24645754   | 0.21593494  | 0.701512085  | 0.485808438 | 2.126548843  | 0.037859292 |
| SLC35F3  | -0.197557884 | 0.843850838 | -0.427381219 | 0.670695267 | -2.041946169 | 0.045857381 |
| SLC35F5  | -0.417275624 | 0.677502507 | -1.546980844 | 0.12734532  | -2.891151863 | 0.005446733 |
| SLC35G1  | -0.025739211 | 0.979524168 | -1.436530504 | 0.156261259 | -1.872235396 | 0.066376983 |
| SLC36A1  | -0.74605571  | 0.457640565 | 1.252511692  | 0.215445288 | 0.383534804  | 0.702769418 |
| SLC36A4  | -0.130922183 | 0.896138479 | -0.375205825 | 0.708885578 | -0.826593665 | 0.411960829 |
| SLC37A1  | -1.888402065 | 0.062297189 | -0.992286053 | 0.325208517 | -2.443776185 | 0.017696642 |
| SLC37A2  | -2.712065356 | 0.008054304 | 2.263334573  | 0.027399967 | 1.73444422   | 0.088317937 |
| SLC37A3  | -0.468524181 | 0.640579046 | -0.162351648 | 0.871597183 | -0.539214036 | 0.591867646 |
| SLC37A4  | 1.986497769  | 0.050118481 | 1.185371807  | 0.240738107 | 2.397615176  | 0.019847004 |
| SLC38A1  | 1.896393925  | 0.06121946  | -0.149520775 | 0.881665055 | -0.335305778 | 0.738642054 |
| SLC38A10 | -0.498185918 | 0.619607358 | 1.510074282  | 0.136491398 | 1.214282717  | 0.229714313 |
| SLC38A11 | -0.728174902 | 0.468457691 | 2.28854974   | 0.025793051 | 2.534933656  | 0.014055442 |
| SLC38A2  | 2.076329365  | 0.04080769  | -0.399320199 | 0.691134138 | -1.142441913 | 0.258111084 |
| SLC38A5  | -2.928769009 | 0.004341611 | -1.031075878 | 0.306815565 | -0.314898958 | 0.754003823 |
| SLC38A6  | 1.902321351  | 0.060430309 | -1.70885331  | 0.092862097 | -0.590707188 | 0.557083248 |
| SLC38A7  | -0.319128687 | 0.75039225  | 0.278037558  | 0.781979198 | 1.290364575  | 0.202204494 |
| SLC38A9  | -0.602330229 | 0.548517652 | -2.44782018  | 0.017441864 | -3.071483877 | 0.003279248 |
| SLC39A1  | -0.121903037 | 0.903256337 | -0.504486592 | 0.615844115 | -0.745105596 | 0.459310659 |
| SLC39A10 | 1.925435052  | 0.057434516 | -0.772494803 | 0.442979869 | -1.230244429 | 0.223727029 |
| SLC39A11 | -0.674035466 | 0.502071889 | 2.999268115  | 0.003992353 | 2.86716113   | 0.005819231 |
| SLC39A13 | 1.721324363  | 0.088738515 | 1.140587656  | 0.258762151 | 1.344197251  | 0.184282236 |
| SLC39A14 | -0.06167453  | 0.950963184 | 2.045617006  | 0.045370468 | 1.572507488  | 0.121442668 |
| SLC39A3  | -0.255673903 | 0.798804857 | -1.242739939 | 0.218999307 | -1.023246815 | 0.310572768 |
| SLC39A4  | 0.251007567  | 0.802398864 | -0.445226128 | 0.657825222 | 0.670791248  | 0.505099255 |
| SLC39A6  | 2.297104193  | 0.024008377 | 1.910313095  | 0.06107588  | 1.086763714  | 0.281777449 |
| SLC39A7  | -0.899187359 | 0.371029539 | 2.398337492  | 0.0197304   | 2.383320294  | 0.020558893 |
| SLC39A8  | 0.431765244  | 0.666977874 | 1.63637254   | 0.107214996 | 1.302107718  | 0.198187601 |
| SLC39A9  | -0.677871474 | 0.499648178 | -0.527188691 | 0.600087384 | 0.966392835  | 0.337985314 |
| SLC3A2   | -1.139505015 | 0.257613482 | 1.075036264  | 0.286841388 | 0.877481305  | 0.383958641 |
| SLC40A1  | -2.439243418 | 0.016744566 | 0.070181412  | 0.944292377 | -1.184428245 | 0.241225334 |
| SLC41A1  | 1.184022034  | 0.239622226 | -1.105793117 | 0.273413624 | 0.379434264  | 0.705794439 |
| SLC41A2  | -0.110622485 | 0.91216996  | -0.319712142 | 0.750343383 | 0.498679366  | 0.619950275 |
| SLC41A3  | 1.693455452  | 0.093938819 | 1.249314331  | 0.216603456 | 1.303233089  | 0.197805822 |
| SLC43A1  | 0.387946129  | 0.699001448 | 0.482484829  | 0.631290249 | 1.589275185  | 0.117605034 |
| SLC43A2  | -2.747296119 | 0.0073003   | -0.462347325 | 0.645574144 | -0.913979269 | 0.364629846 |
| SLC43A3  | -1.520309636 | 0.132051481 | 2.61212503   | 0.011456089 | 2.391565527  | 0.020145537 |
| SLC44A1  | -0.234553382 | 0.815105335 | 0.848933757  | 0.399432815 | -0.370895013 | 0.712109251 |
| SLC44A2  | -2.631417786 | 0.0100541   | -0.687825028 | 0.494323754 | -0.536302404 | 0.593864736 |
| SLC44A5  | -1.053394296 | 0.29507085  | 0.621083013  | 0.5369953   | 0.37650003   | 0.707961999 |
| SLC45A1  | -0.469624976 | 0.639795373 | 1.004696767  | 0.319245237 | 0.576332895  | 0.566689811 |
| SLC45A3  | -3.563290603 | 0.000596622 | 1.789423411  | 0.078804572 | -2.514949216 | 0.014790012 |
| SLC45A4  | -2.047229656 | 0.043645685 | -2.073426728 | 0.042615339 | -1.888508837 | 0.064119414 |
| SLC46A1  | 1.023398553  | 0.308950559 | 0.140516579  | 0.888742123 | 0.165185367  | 0.869390447 |
| SLC46A2  | -1.244122434 | 0.216788812 | 0.024550442  | 0.980498409 | -0.70953755  | 0.480922555 |
| SLC46A3  | 2.626306888  | 0.010194851 | -1.297883496 | 0.199501069 | -0.667811786 | 0.506985228 |
| SLC47A1  | -1.585073726 | 0.116570085 | -0.986225057 | 0.328147653 | -0.500893597 | 0.618400924 |
| SLC48A1  | 0.054676432  | 0.956521338 | -1.334841109 | 0.187180933 | -0.422121968 | 0.674545446 |
| SLC4A1   | -2.985391028 | 0.003675112 | 1.269212354  | 0.209470217 | 0.512327763  | 0.610427984 |
| SLC4A10  | 1.245270345  | 0.21636875  | -2.806560686 | 0.006820584 | -1.774532282 | 0.08138792  |
| SLC4A1AP | 0.440424039  | 0.660720007 | 2.844507528  | 0.006148145 | 2.614449895  | 0.011448992 |
| SLC4A2   | 0.020143266  | 0.983975112 | 0.693050036  | 0.491063413 | 0.541160457  | 0.590534364 |
| SLC4A3   | 1.515252228  | 0.133325635 | -0.400063099 | 0.690589959 | 0.331019227  | 0.741860232 |
| SLC4A4   | 1.353744842  | 0.179316668 | -2.375706551 | 0.020864039 | -2.45227808  | 0.01732426  |
| SLC4A5   | 1.43326421   | 0.155358567 | 2.048050871  | 0.045123338 | 1.333140027  | 0.187861404 |
| SLC4A7   | 2.386920516  | 0.019152021 | -1.239391608 | 0.220226993 | -1.807795207 | 0.075987277 |

|          |              |             |              |             |              |             |
|----------|--------------|-------------|--------------|-------------|--------------|-------------|
| SLC4A8   | 0.605210136  | 0.546611429 | -0.614229574 | 0.541482353 | -0.214383856 | 0.8310232   |
| SLC50A1  | -2.225690328 | 0.0286144   | 1.533780388  | 0.130558768 | 1.136014785  | 0.260768457 |
| SLC5A10  | 0.681823376  | 0.497157865 | -0.196595575 | 0.844836088 | 0.919978763  | 0.361513365 |
| SLC5A11  | -0.45806215  | 0.648047386 | 1.266429567  | 0.210457186 | 1.286989041  | 0.203370338 |
| SLC5A2   | 2.720349859  | 0.007870883 | -2.106692426 | 0.03951139  | -1.825774727 | 0.073195239 |
| SLC5A3   | 0.344519932  | 0.731284925 | 0.28775851   | 0.774564487 | -0.987063517 | 0.327839406 |
| SLC5A5   | 2.598815285  | 0.01098302  | 0.387708351  | 0.699661024 | 0.358228167  | 0.721513778 |
| SLC5A6   | 0.89177036   | 0.374970519 | 1.334108522  | 0.187419417 | 2.210626437  | 0.031145884 |
| SLC5A9   | -1.181913252 | 0.240453614 | -0.996964302 | 0.322951966 | -1.346986123 | 0.18338773  |
| SLC6A12  | -2.459597695 | 0.015883586 | 1.183565303  | 0.241447144 | 0.263739568  | 0.792944643 |
| SLC6A16  | 0.738187565  | 0.462382797 | -1.324854043 | 0.190451939 | 0.583627467  | 0.561804548 |
| SLC6A4   | -2.386861647 | 0.019154894 | 1.350746006  | 0.182059839 | -0.118866185 | 0.90580496  |
| SLC6A6   | -0.931328049 | 0.354255572 | -1.208214648 | 0.231902082 | -1.698557602 | 0.094929387 |
| SLC6A8   | -3.121635232 | 0.002439858 | 1.233720286  | 0.222317961 | 0.449397853  | 0.65487195  |
| SLC6A9   | -1.108782484 | 0.270573119 | 1.023123158  | 0.310527722 | 1.073232847  | 0.287750404 |
| SLC7A1   | 3.041443726  | 0.003109666 | 0.290342426  | 0.772597103 | 0.633680193  | 0.528858526 |
| SLC7A11  | -0.32490603  | 0.746030502 | -0.180922468 | 0.857063569 | -1.803022877 | 0.076743181 |
| SLC7A5   | -0.369126243 | 0.712928536 | 0.423532028  | 0.673484585 | 0.457779752  | 0.64887455  |
| SLC7A5P1 | 0.692948623  | 0.490183499 | -3.155752562 | 0.002545756 | -2.503002196 | 0.01524557  |
| SLC7A5P2 | 3.027007122  | 0.003247032 | -1.809478433 | 0.075595772 | -1.215565536 | 0.22922884  |
| SLC7A6   | 2.547393579  | 0.012606543 | -1.31500161  | 0.193720991 | -0.382661282 | 0.703413424 |
| SLC7A6OS | 1.66295563   | 0.099912207 | -1.297067702 | 0.199779723 | -1.693091481 | 0.095971288 |
| SLC7A7   | -2.910547451 | 0.004578751 | 0.584379061  | 0.561247369 | 0.643571985  | 0.522468952 |
| SLC7A8   | -1.516379174 | 0.133040879 | 0.524106407  | 0.602215684 | -0.443894102 | 0.658822488 |
| SLC8A1   | -0.916827743 | 0.361761959 | -0.473368284 | 0.63773971  | -1.158551966 | 0.251535091 |
| SLC8A3   | -4.048612678 | 0.000111263 | 0.108340937  | 0.914101799 | 0.158089411  | 0.874952648 |
| SLC9A1   | -1.15222841  | 0.25237673  | 0.579303792  | 0.56464318  | 0.520807837  | 0.604545331 |
| SLC9A3   | 1.185141876  | 0.239181568 | -1.205044927 | 0.233113875 | 0.274169568  | 0.7849589   |
| SLC9A3R1 | -1.944476224 | 0.055061849 | -1.52864318  | 0.131826661 | -0.83862393  | 0.405230919 |
| SLC9A3R2 | -0.590871069 | 0.556135443 | 0.691498591  | 0.492030256 | -0.168914996 | 0.866469598 |
| SLC9A4   | -0.000722945 | 0.999424825 | 0.573004138  | 0.568872276 | -1.148710058 | 0.255538071 |
| SLC9A5   | 2.659221307  | 0.009318789 | 0.090501267  | 0.928202887 | 0.151202768  | 0.880356854 |
| SLC9A6   | 1.902338797  | 0.060427999 | -0.352094406 | 0.726052495 | -0.404476341 | 0.687396754 |
| SLC9A7   | 1.85080262   | 0.067584111 | 0.693169962  | 0.49098872  | 0.574884477  | 0.567662318 |
| SLC9A7P1 | -1.20475766  | 0.231556878 | 1.256940221  | 0.213848729 | 0.482701271  | 0.631181596 |
| SLC9A8   | -1.469644044 | 0.145257462 | -0.614027037 | 0.541615249 | -0.114017528 | 0.909629986 |
| SLC9A9   | 0.574314629  | 0.567233706 | 1.626753969  | 0.109248625 | 2.286196733  | 0.026030752 |
| SLC9B1   | 1.306256805  | 0.194900779 | -0.189008355 | 0.850750714 | 0.093202872  | 0.926073648 |
| SLC9B2   | 1.377069703  | 0.172016041 | -1.624916807 | 0.109640589 | -0.160272305 | 0.873240887 |
| SLC03A1  | -1.910395732 | 0.059369137 | 0.296878403  | 0.767627354 | -0.148071574 | 0.882815927 |
| SLC04A1  | 0.873202047  | 0.384951552 | 0.500897701  | 0.618352022 | 0.100302069  | 0.920461242 |
| SLC04C1  | -1.516155505 | 0.133097358 | -0.356233537 | 0.722967291 | -0.594210506 | 0.554754329 |
| SLED1    | -1.808075065 | 0.074042761 | 0.666142723  | 0.50797929  | 0.056380382  | 0.955238625 |
| SLEFN11  | 1.167495665  | 0.246193159 | -0.837442742 | 0.405805311 | -1.068053718 | 0.290059684 |
| SLEFN12  | -1.396769236 | 0.166028245 | 0.782507574  | 0.437121748 | -0.939849088 | 0.351314465 |
| SLEFN12L | 1.332674969  | 0.186110807 | -2.092677566 | 0.040794245 | -1.076398537 | 0.286345167 |
| SLEFN13  | 1.75266509   | 0.083174776 | -0.080642922 | 0.936005495 | 0.690503156  | 0.49271799  |
| SLEFN14  | -0.202080579 | 0.840324498 | 0.550616633  | 0.584025906 | 0.172677285  | 0.863525069 |
| SLEFN5   | 0.119499034  | 0.905154922 | -0.636851551 | 0.526744736 | -1.380353906 | 0.172940119 |
| SLIRP    | 1.299940393  | 0.19704758  | 0.073313917  | 0.941810333 | 1.783708295  | 0.079867046 |
| SLIT1    | 0.820164208  | 0.414359089 | 0.889984785  | 0.377176439 | 0.356850416  | 0.722539335 |
| SLITRK4  | 1.88417222   | 0.06288156  | 0.050691678  | 0.959746599 | -0.212768481 | 0.832276935 |
| SLK      | -0.63892864  | 0.524544321 | -0.456677131 | 0.649620749 | -2.037924085 | 0.046271578 |
| SLMAP    | -0.615795351 | 0.539633834 | -0.017970303 | 0.985724651 | -1.582081183 | 0.119239393 |
| SLMO1    | 3.27613351   | 0.001511317 | 2.148131729  | 0.035921666 | 0.999631632  | 0.321770743 |
| SLMO2    | 0.33416267   | 0.739059253 | -0.221019975 | 0.825858543 | -0.695182239 | 0.489803724 |
| SLPI     | -0.475068935 | 0.635925756 | 0.875907777  | 0.384718569 | 0.615406967  | 0.540768569 |
| SLTM     | 2.630465853  | 0.010080181 | 2.035452761  | 0.046415218 | 2.101089172  | 0.040127337 |
| SLU7     | -1.114273669 | 0.268224004 | 0.210330361  | 0.834152144 | -0.051808897 | 0.958864717 |
| SLX4     | 1.501350353  | 0.13687794  | -0.373172393 | 0.71039007  | 0.757631145  | 0.45183489  |
| SMAD1    | -0.67752616  | 0.4998661   | 0.778280574  | 0.439589217 | -0.834350904 | 0.407613552 |
| SMAD2    | -0.582784393 | 0.561542701 | -0.546033083 | 0.587152047 | -1.40123012  | 0.16663985  |
| SMAD3    | 4.192494486  | 6.60E-05    | 0.86472213   | 0.390778575 | 0.822695696  | 0.414155932 |
| SMAD4    | 0.251226005  | 0.802230527 | -0.9154457   | 0.363774596 | -0.825480426 | 0.412587015 |
| SMAD5    | 1.087147484  | 0.279967933 | -1.354293621 | 0.180932251 | -2.482013589 | 0.016076707 |
| SMAD7    | -0.346564251 | 0.729753708 | -3.723974035 | 0.000448046 | -3.872226066 | 0.000283469 |
| SMAD9    | 1.821480876  | 0.071963241 | -0.163548134 | 0.870659409 | 1.793577374  | 0.078257846 |
| SMAGP    | 1.298635707  | 0.197493198 | -0.34137098  | 0.734066601 | 1.024639668  | 0.309920645 |
| SMAP1    | -1.108165842 | 0.270837811 | 0.854246525  | 0.396507549 | 0.708148771  | 0.481777795 |
| SMAP2    | -1.978596261 | 0.051018012 | -0.499781349 | 0.61913306  | -0.917638919 | 0.362726769 |
| SMARCA1  | 0.869719535  | 0.386841749 | 1.693148827  | 0.095829802 | 2.060800903  | 0.043958192 |
| SMARCA2  | 0.323023421  | 0.747450923 | 1.887063199  | 0.064194911 | 1.324775685  | 0.190603714 |

|          |              |             |              |             |              |             |
|----------|--------------|-------------|--------------|-------------|--------------|-------------|
| SMARCA4  | 0.269369223  | 0.788282018 | 1.342676315  | 0.184644652 | 1.608095579  | 0.11341464  |
| SMARCA5  | 1.565264737  | 0.121143298 | 1.853511213  | 0.068933132 | 1.060599432  | 0.29340585  |
| SMARCAD1 | 1.476104608  | 0.143518364 | -0.988847126 | 0.326873979 | -1.525958956 | 0.132624928 |
| SMARCAL1 | -0.3595777   | 0.72003241  | 2.407030094  | 0.019309849 | 2.679716248  | 0.009647575 |
| SMARCB1  | -0.598695739 | 0.550928094 | 1.227755322  | 0.224532895 | 1.495459869  | 0.140385413 |
| SMARCC1  | -1.052578439 | 0.295442654 | 2.232091346  | 0.029513545 | 2.218422928  | 0.030579984 |
| SMARCC2  | -0.563824021 | 0.574321294 | -0.096388783 | 0.923546408 | 0.543830672  | 0.588807601 |
| SMARCD1  | -0.211712462 | 0.832825472 | 0.363112934  | 0.717849791 | 1.299915225  | 0.198932986 |
| SMARCD2  | -1.239900705 | 0.218338827 | 1.184421422  | 0.241110937 | 1.706377157  | 0.093455092 |
| SMARCD3  | -2.470549491 | 0.015436906 | -0.092177547 | 0.926876841 | -0.832373316 | 0.408719148 |
| SMARCE1  | 0.415485061  | 0.678807604 | -0.424827603 | 0.672545229 | 0.526341463  | 0.600720776 |
| SMC1A    | 0.878055605  | 0.382326795 | 1.831813141  | 0.07215175  | 1.315486377  | 0.193684629 |
| SMC1B    | 0.406892837  | 0.685083846 | 0.767892452  | 0.445687922 | 1.421901879  | 0.160577334 |
| SMC2     | 1.166258608  | 0.246690136 | 0.689734205  | 0.493131075 | 0.346900481  | 0.729960871 |
| SMC3     | 1.787805553  | 0.077281685 | 2.310767801  | 0.024447028 | 2.257238355  | 0.027895489 |
| SMC4     | -0.23993248  | 0.810945792 | -0.483625503 | 0.630485294 | -1.530385395 | 0.131527516 |
| SMC5     | 1.079404609  | 0.283384377 | 0.142418546  | 0.887246447 | -0.526678643 | 0.600488098 |
| SMC6     | -0.13724765  | 0.891151492 | -0.288801739 | 0.773769997 | -0.728474361 | 0.469345965 |
| SMCHD1   | -0.44911869  | 0.654460416 | -0.70984024  | 0.480667244 | -2.699849691 | 0.009146631 |
| SMCR7    | -0.295351048 | 0.768427926 | 1.365363711  | 0.177447893 | 0.943550231  | 0.349435647 |
| SMCR7L   | 0.926128342  | 0.356935722 | 1.434311933  | 0.156890614 | 1.517517703  | 0.134737871 |
| SMCR8    | 0.333350437  | 0.739670089 | -0.167557347 | 0.867518463 | -0.157690541 | 0.875265495 |
| SMEK1    | 0.741944647  | 0.460114883 | 1.031193097  | 0.306761076 | 0.850184013  | 0.39882801  |
| SMEK2    | 0.572950495  | 0.568152917 | -0.307237279 | 0.759770917 | -1.459867066 | 0.149890625 |
| SMG1     | 0.851471999  | 0.3968398   | -1.145460127 | 0.256755831 | -2.868659488 | 0.005795293 |
| SMG5     | -0.32336696  | 0.747191658 | 1.114007657  | 0.269903159 | 1.245913805  | 0.217961652 |
| SMG6     | 0.460856139  | 0.646049322 | 1.675695732  | 0.09921889  | 2.212075391  | 0.03104002  |
| SMG7     | -1.725317545 | 0.088013095 | 0.346264448  | 0.730405738 | 0.239035818  | 0.811946802 |
| SMG8     | -0.692789868 | 0.490282643 | 1.279472399  | 0.205861011 | 0.653284303  | 0.516235164 |
| SMG9     | -0.080485677 | 0.936035447 | 1.911159585  | 0.060964794 | 2.41589098   | 0.018969091 |
| SMNDC1   | -0.617651962 | 0.53841468  | 0.17042117   | 0.865276162 | -1.204555939 | 0.233419787 |
| SMO      | 1.236716718  | 0.219513181 | 1.908080347  | 0.061369711 | 0.881347962  | 0.381880915 |
| SMOC1    | 0.589182045  | 0.557262692 | 0.857689802  | 0.394618749 | 1.115660195  | 0.269312312 |
| SMOX     | -3.396459818 | 0.001030055 | 1.597135024  | 0.115708096 | 0.34261679   | 0.733164088 |
| SMPD1    | -0.475348658 | 0.635727197 | 0.571941696  | 0.569587045 | 1.730880385  | 0.088956991 |
| SMPD2    | 0.419203726  | 0.67609826  | 0.332823697  | 0.740475787 | 0.094952919  | 0.924689753 |
| SMPD3    | 3.718291047  | 0.000353983 | -0.651457519 | 0.51734219  | -0.400906909 | 0.690007839 |
| SMPD4    | 1.494564972  | 0.138638557 | 0.280689987  | 0.779953993 | 1.186248101  | 0.240511924 |
| SMPDL3A  | -1.199712428 | 0.23350099  | -0.415567551 | 0.679270665 | -1.771855464 | 0.081836109 |
| SMPDL3B  | -1.816872469 | 0.072672544 | -0.112456172 | 0.910852742 | 1.438276765  | 0.155897602 |
| SMS      | -0.942963554 | 0.348305124 | 1.622337066  | 0.11019291  | 1.707708635  | 0.093205944 |
| SMTN     | 0.71719652   | 0.475169864 | 2.373934312  | 0.020955228 | 1.59316775   | 0.116728261 |
| SMTNL1   | -2.015598094 | 0.04692134  | -0.601420649 | 0.549919748 | -1.049872589 | 0.298267553 |
| SMU1     | -1.43889565  | 0.153760392 | 2.43318297   | 0.018092614 | 2.413164272  | 0.019097817 |
| SMUG1    | -1.23251517  | 0.221056392 | -0.406215296 | 0.686089761 | -0.147247661 | 0.883463179 |
| SMURF1   | 1.076152738  | 0.284827755 | -0.185951352 | 0.853136263 | 0.136558009  | 0.891867865 |
| SMURF2   | -0.089043571 | 0.9292515   | -1.53594926  | 0.1300264   | -2.965012735 | 0.004434166 |
| SMYD2    | -0.067060776 | 0.946686861 | -0.095023323 | 0.924626127 | -0.083020689 | 0.934129896 |
| SMYD3    | 1.293596057  | 0.19922155  | 1.274542528  | 0.207589379 | 2.729971413  | 0.008441557 |
| SMYD4    | 2.434296646  | 0.016960009 | 1.170014081  | 0.246814014 | 2.260279982  | 0.027694217 |
| SMYD5    | 1.972749456  | 0.051692451 | 2.145104822  | 0.036173866 | 3.813904382  | 0.000342096 |
| SNAI1    | 0.118658489  | 0.905818881 | 0.685280349  | 0.495915894 | -0.594046597 | 0.554863183 |
| SNAI3    | -1.873239352 | 0.064385832 | -0.890378803 | 0.376966687 | -2.00063377  | 0.050268165 |
| SNAP23   | -1.29699574  | 0.198054397 | -1.002122017 | 0.320476315 | -2.263812171 | 0.027462098 |
| SNAP29   | -3.257370374 | 0.001603122 | -0.760835696 | 0.449858907 | -1.31267998  | 0.194622753 |
| SNAP47   | -0.449958227 | 0.6538573   | 3.229365969  | 0.002050906 | 4.4144856    | 4.65E-05    |
| SNAP91   | -0.67113457  | 0.503908961 | -0.26892746  | 0.788946497 | 0.025052028  | 0.980102149 |
| SNAPC1   | 0.952716341  | 0.343367587 | -0.27018315  | 0.787985116 | -0.317414653 | 0.752104513 |
| SNAPC2   | 0.329794145  | 0.742346546 | -0.705117044 | 0.48357926  | -1.401920879 | 0.166434452 |
| SNAPC3   | 1.917447944  | 0.058455213 | -1.896772789 | 0.062876302 | -2.028748712 | 0.047228586 |
| SNAPC4   | 0.167767602  | 0.867154641 | -0.147585328 | 0.883185469 | 0.480106948  | 0.633013573 |
| SNAPC5   | 0.586219979  | 0.559242295 | -1.864559842 | 0.067341273 | -1.788478447 | 0.079085834 |
| SNAPIN   | -0.101658203 | 0.919261403 | -2.43931746  | 0.017817273 | -2.029847936 | 0.047113041 |
| SNCA     | -3.747953477 | 0.000319826 | 0.37617368   | 0.708169892 | -0.165431429 | 0.869197688 |
| SND1     | -1.074995449 | 0.285342648 | 2.599923922  | 0.011826087 | 2.420746042  | 0.0187418   |
| SNED1    | 4.18392375   | 6.81E-05    | 0.382546311  | 0.70346424  | 0.272525853  | 0.786215895 |
| SNF8     | -1.180813104 | 0.240888167 | 1.984585334  | 0.051961412 | 2.984792177  | 0.004194403 |
| SNHG1    | 1.367013816  | 0.175135286 | -1.591758541 | 0.116913039 | -0.172105332 | 0.86397258  |
| SNHG10   | 2.371708689  | 0.019907451 | 0.443367635  | 0.659160837 | 0.350942849  | 0.726942537 |
| SNHG11   | -0.565861193 | 0.572941623 | 0.746095872  | 0.458643926 | 1.558880152  | 0.124635099 |
| SNHG12   | 3.520859381  | 0.000686597 | 0.225629791  | 0.822288075 | 0.637864392  | 0.526150779 |
| SNHG3    | 1.388959285  | 0.168382768 | -0.395509438 | 0.693928116 | 0.721615334  | 0.473520705 |



|          |              |             |              |             |              |             |
|----------|--------------|-------------|--------------|-------------|--------------|-------------|
| SNHG4    | 1.013316202  | 0.31371295  | 2.01835756   | 0.048219265 | 3.319290603  | 0.001587882 |
| SNHG5    | 1.022040299  | 0.309589281 | 0.360000958  | 0.72016316  | 0.434016478  | 0.665937065 |
| SNHG6    | -1.006128345 | 0.317137978 | -1.294402857 | 0.200691998 | -0.949120061 | 0.346620594 |
| SNHG7    | 2.041404172  | 0.044233759 | 0.220791721  | 0.826035431 | 0.628595925  | 0.532158515 |
| SNHG8    | 1.159240172  | 0.24952327  | 1.033457298  | 0.305709863 | 1.563700708  | 0.123498206 |
| SNHG9    | -1.488470808 | 0.140234904 | -4.794520078 | 1.19E-05    | -4.095388048 | 0.000136389 |
| SNIP1    | -1.358004206 | 0.177966286 | -1.708143601 | 0.092994559 | -1.485687434 | 0.142946517 |
| SNN      | -4.190898626 | 6.64E-05    | -1.543953277 | 0.128076698 | -1.737476934 | 0.087777119 |
| SNORA67  | 0.517367826  | 0.606209528 | 1.65874213   | 0.102604346 | 2.409569847  | 0.019268712 |
| SNORA70  | 1.715577941  | 0.089791031 | 1.543834704  | 0.12810541  | 1.967400107  | 0.054076875 |
| SNORD10  | 1.099631001  | 0.274519905 | 1.755664423  | 0.084462459 | 0.95729099   | 0.342517823 |
| SNORD17  | -1.919164415 | 0.058234576 | 2.090355152  | 0.04101029  | 1.847360684  | 0.069957497 |
| SNPH     | 1.463974583  | 0.146797093 | 2.020525771  | 0.047987157 | 3.018599285  | 0.003812352 |
| SNRK     | -0.925997824 | 0.357003163 | -0.703206232 | 0.484760128 | -2.030014431 | 0.047095561 |
| SNRNP200 | 0.629922871  | 0.530392422 | 1.523938908  | 0.132996274 | 1.725683372  | 0.089895752 |
| SNRNP25  | 0.206738123  | 0.836696422 | 0.423874706  | 0.673236076 | 0.365869613  | 0.715835087 |
| SNRNP27  | -0.304628801 | 0.761374821 | -1.484624656 | 0.14309589  | -1.346438348 | 0.183563163 |
| SNRNP35  | -1.150881858 | 0.252927352 | 0.421922097  | 0.674652593 | 1.582354656  | 0.119176932 |
| SNRNP40  | 2.792250219  | 0.00643185  | 1.386491482  | 0.170940498 | 3.387978093  | 0.001291685 |
| SNRNP48  | 1.683417772  | 0.09587169  | -0.464712279 | 0.643889532 | 0.081503411  | 0.935330996 |
| SNRNP70  | 0.526714658  | 0.599729241 | -1.902618806 | 0.06209352  | -0.894529424 | 0.374851295 |
| SNRPA    | 0.231297483  | 0.817625639 | -3.038661742 | 0.003569238 | -2.177328732 | 0.033667894 |
| SNRPA1   | 1.452281791  | 0.150012519 | -1.569958081 | 0.121902782 | 0.832761178  | 0.408502164 |
| SNRPB    | -1.286841431 | 0.201555653 | 3.733051612  | 0.000435254 | 4.080269777  | 0.000143404 |
| SNRPB2   | -0.083594889 | 0.933570163 | -0.254393816 | 0.800097389 | 1.088153992  | 0.281168664 |
| SNRPC    | -0.67470477  | 0.501648547 | -1.681851898 | 0.098012431 | -0.731886799 | 0.467276798 |
| SNRPD1   | 0.882294885  | 0.380043389 | 0.323687458  | 0.747347091 | 1.20159806   | 0.234555192 |
| SNRPD2   | 0.781314959  | 0.436733684 | -2.197444007 | 0.032024501 | -1.055983322 | 0.295491267 |
| SNRPD3   | -0.220550575 | 0.825958017 | -1.303165395 | 0.197703958 | 0.198812976  | 0.843126079 |
| SNRPE    | 0.204345533  | 0.838559736 | -0.205052644 | 0.838253947 | 0.081466525  | 0.935360198 |
| SNRPF    | -0.252398716 | 0.801326954 | -0.901511701 | 0.371070748 | -0.04841244  | 0.961559073 |
| SNRPG    | 1.418323515  | 0.159660826 | -1.910566705 | 0.061042581 | -1.494328152 | 0.140680139 |
| SNTA1    | 0.29829524   | 0.766187557 | 1.085318765  | 0.282302309 | 1.585419581  | 0.118478705 |
| SNTB1    | 0.705204515  | 0.48256272  | -1.167782742 | 0.247705882 | -3.014858637 | 0.003852969 |
| SNTB2    | 0.536674561  | 0.592859227 | -3.78221206  | 0.000371834 | -4.369189744 | 5.42E-05    |
| SNUPN    | 1.254607747  | 0.212973987 | 2.829252528  | 0.006410752 | 3.068721113  | 0.003305278 |
| SNW1     | -0.52671209  | 0.599731018 | 2.660213216  | 0.010098258 | 2.034819498  | 0.046593498 |
| SNX1     | -0.079303372 | 0.936973057 | 1.58394374   | 0.118682449 | 1.459687833  | 0.149939736 |
| SNX10    | -1.257477838 | 0.21193842  | -1.49914829  | 0.139296653 | -2.833525682 | 0.00638128  |
| SNX11    | -2.444872958 | 0.016502362 | 0.863477938  | 0.391456295 | 0.382741865  | 0.703354005 |
| SNX12    | -0.356654972 | 0.722211804 | -0.170485366 | 0.865225911 | -1.078664251 | 0.285342353 |
| SNX13    | -0.676619846 | 0.500438301 | -1.085287513 | 0.282316029 | -2.142457297 | 0.036499644 |
| SNX14    | 1.180576676  | 0.240981628 | 0.740947602  | 0.461735432 | 0.185928485  | 0.853169873 |
| SNX16    | 0.190586838  | 0.849292371 | -0.856871769 | 0.395066972 | -1.816342591 | 0.07464902  |
| SNX17    | -0.611028656 | 0.542770338 | 3.171756238  | 0.002429479 | 3.806247139  | 0.000350609 |
| SNX18    | -1.140037793 | 0.257392672 | -1.394753803 | 0.168446152 | -3.110515981 | 0.002931415 |
| SNX19    | 1.717332272  | 0.089468629 | 2.815473037  | 0.006656821 | 2.32915819   | 0.023468019 |
| SNX2     | -0.707331063 | 0.48124712  | 0.677804969  | 0.500609248 | 0.210031847  | 0.834401906 |
| SNX20    | -1.433959641 | 0.155160516 | -1.514128463 | 0.135461936 | -2.345373654 | 0.022560766 |
| SNX21    | 0.662092834  | 0.509657963 | 1.184331797  | 0.241146118 | 1.768673925  | 0.082371476 |
| SNX22    | 0.20063755   | 0.841449276 | 0.245771383  | 0.806732905 | 0.795700949  | 0.429551786 |
| SNX24    | -0.477801907 | 0.633986929 | 0.25546421   | 0.799274674 | 0.37061556   | 0.712316253 |
| SNX25    | 0.037861082  | 0.969884998 | -0.127592375 | 0.898916001 | 0.501318127  | 0.618104069 |
| SNX27    | -2.626107135 | 0.010200388 | -0.689612387 | 0.493207128 | -0.740911219 | 0.461829853 |
| SNX29    | -0.256342108 | 0.798290559 | 2.387799392  | 0.02025123  | 1.240463197  | 0.219954579 |
| SNX3     | -2.158715109 | 0.033619766 | -1.801872982 | 0.076799528 | -2.047557841 | 0.045284847 |
| SNX30    | 0.31055038   | 0.756883617 | 2.052047562  | 0.044720048 | 0.579063897  | 0.564858378 |
| SNX32    | 1.115791687  | 0.267577122 | 0.432467677  | 0.6670165   | -0.139678971 | 0.889412691 |
| SNX33    | -1.031350197 | 0.305229071 | 0.592883749  | 0.555579797 | 0.594033612  | 0.554871807 |
| SNX4     | 1.266105981  | 0.20884757  | -0.149304367 | 0.881835034 | -0.726293457 | 0.470671099 |
| SNX5     | 1.111146447  | 0.269560069 | -0.065141246 | 0.948287113 | -0.004976305 | 0.99604711  |
| SNX6     | -1.537339335 | 0.127831516 | 0.612127371  | 0.542862539 | -0.162006888 | 0.871881111 |
| SNX7     | 1.000358651  | 0.319905231 | 0.431718954  | 0.667557499 | 0.670326221  | 0.505393363 |
| SNX8     | 0.419552636  | 0.67584427  | 1.76347073   | 0.083125015 | 1.840336718  | 0.070997538 |
| SNX9     | 2.999910571  | 0.003520155 | 0.677353958  | 0.500893182 | 1.327756159  | 0.189623093 |
| SOAT1    | -0.800879843 | 0.425378254 | 1.256633477  | 0.213959033 | 0.876773059  | 0.384339982 |
| SOAT2    | -1.82285441  | 0.071752952 | -0.117014328 | 0.907255779 | 0.000579294  | 0.99953984  |
| SOBP     | -0.094855329 | 0.92464474  | 1.229735709  | 0.523795743 | 0.570597746  | 0.570545342 |
| SOCS1    | -0.486160898 | 0.628072778 | -1.533631961 | 0.130595264 | -2.781112447 | 0.007357783 |
| SOCS2    | -1.09807227  | 0.275196111 | 0.727342422  | 0.469962478 | -0.413709546 | 0.680660347 |
| SOCS3    | -0.100536427 | 0.920149287 | 0.239076762  | 0.811894736 | -1.404458325 | 0.16568162  |
| SOCS4    | 0.945239774  | 0.347148656 | -1.161479228 | 0.250237903 | -2.064665687 | 0.043577434 |

|          |              |             |              |             |              |              |
|----------|--------------|-------------|--------------|-------------|--------------|--------------|
| SOCS5    | 1.763420783  | 0.081332924 | 0.313501261  | 0.755032404 | -0.708282099 | 0.481695652  |
| SOCS6    | -0.004418567 | 0.996484599 | 0.061571639  | 0.951117127 | -1.34829827  | 0.182968015  |
| SOCS7    | 2.350831053  | 0.020987294 | -0.078574146 | 0.9376437   | 0.558132565  | 0.578969215  |
| SOD1     | 1.15254414   | 0.252247747 | 0.015187781  | 0.987934858 | 0.931723277  | 0.355462394  |
| SOD2     | -3.027978179 | 0.003237619 | -0.465136609 | 0.64358747  | -1.445870462 | 0.153763802  |
| SOLH     | 1.218294523  | 0.226398482 | -1.71234808  | 0.092212086 | -0.580085362 | 0.564174127  |
| SON      | 0.675218309  | 0.501323858 | 2.41200975   | 0.019072569 | 1.555410468  | 0.125458575  |
| SORBS1   | 0.374795915  | 0.708722351 | -0.506070105 | 0.614739019 | -1.277520811 | 0.206667291  |
| SORBS3   | 1.017569473  | 0.31169796  | 0.671500649  | 0.50458607  | 1.648518111  | 0.104822592  |
| SORCS2   | -0.691704709 | 0.490960635 | -1.221129914 | 0.22701199  | -0.662265054 | 0.510506358  |
| SORCS3   | 1.099219443  | 0.274698334 | 1.86758644   | 0.066910663 | 2.354174987  | 0.022081552  |
| SORD     | -0.258910142 | 0.796314847 | 0.166582499  | 0.868281995 | 0.302290569  | 0.763545781  |
| SORL1    | -1.51618779  | 0.133089204 | 0.490014903  | 0.62598474  | -0.178147791 | 0.859247096  |
| SORT1    | 0.011997104  | 0.990455335 | 1.286878231  | 0.203284791 | 1.083913257  | 0.283028497  |
| SOS1     | 0.16623189   | 0.868359344 | -2.020990372 | 0.047937547 | -2.826885319 | 0.006498005  |
| SOS2     | -0.456227279 | 0.649360961 | -0.491724078 | 0.624783245 | -1.43153104  | 0.157812413  |
| SOX10    | 0.645573056  | 0.520251258 | -0.038991494 | 0.969032009 | 0.91040795   | 0.366493155  |
| SOX12    | 1.80968237   | 0.073790827 | 0.574285748  | 0.568010647 | 0.521349845  | 0.604170227  |
| SOX13    | -1.096171881 | 0.276022097 | -1.758686354 | 0.083942611 | -1.316031945 | 0.193502653  |
| SOX15    | 0.33321714   | 0.73977035  | -0.916936432 | 0.362999504 | -0.758127564 | 0.451540068  |
| SOX4     | -0.945998208 | 0.346763875 | 2.079339093  | 0.042048675 | 0.996724351  | 0.323167821  |
| SOX6     | -2.82053995  | 0.005934918 | -0.158549151 | 0.874578703 | 0.563401942  | 0.575400895  |
| SOX7     | 0.194644819  | 0.846123844 | 0.35267937   | 0.7256162   | 1.019009694  | 0.312562271  |
| SOX8     | 1.722938859  | 0.08844463  | 1.414502638  | 0.162597753 | 0.649122416  | 0.518901587  |
| SP1      | -0.317747981 | 0.751435857 | -1.078848226 | 0.285152781 | -1.110617383 | 0.271459197  |
| SP100    | -1.048404967 | 0.297349589 | 0.157035306  | 0.875766213 | -1.435418253 | 0.156706785  |
| SP110    | -1.983618059 | 0.050444737 | 2.026804948  | 0.047320397 | 0.052334712  | 0.958447455  |
| SP140    | -2.164763949 | 0.033138332 | 1.583228773  | 0.118845401 | 1.157371697  | 0.252012756  |
| SP140L   | -0.276981743 | 0.782449732 | -0.229858111 | 0.819016406 | 1.755250359  | 0.084662501  |
| SP2      | -1.326432234 | 0.18816054  | -1.711367001 | 0.092394182 | -1.696096469 | 0.095397348  |
| SP3      | 0.261054143  | 0.794666381 | -0.625015476 | 0.534429343 | -1.693502316 | 0.095892653  |
| SP4      | 1.017127418  | 0.311906979 | -1.30367123  | 0.197532492 | -2.077495676 | 0.042333864  |
| SPAG1    | -1.204828425 | 0.231529693 | -0.628851757 | 0.53193228  | -2.343992925 | 0.02263678   |
| SPAG16   | 1.099740305  | 0.274472531 | -0.099209234 | 0.921316635 | 0.508979251  | 0.612758021  |
| SPAG5    | 1.389310594  | 0.168276312 | 1.604879675  | 0.113990045 | 2.532047683  | 0.014159439  |
| SPAG7    | -0.045293322 | 0.963977087 | 1.465240361  | 0.148293185 | 2.405841137  | 0.01944744   |
| SPAG8    | 1.431199199  | 0.155947811 | -0.280939943 | 0.779763223 | -0.170891269 | 0.864922642  |
| SPAG9    | -1.033745514 | 0.304113981 | -1.506648301 | 0.137366166 | -2.489740176 | 0.015766096  |
| SPARC    | -4.679809316 | 1.04E-05    | 1.23657182   | 0.221264808 | -0.045599906 | 0.963790685  |
| SPARCL1  | 1.543072372  | 0.126435115 | 2.852499104  | 0.006014576 | 1.687916305  | 0.0969666374 |
| SPAST    | -1.251229114 | 0.214197799 | -0.15894434  | 0.874268751 | -1.007651743 | 0.317937741  |
| SPATA13  | 1.091324281  | 0.278136844 | -1.694574688 | 0.095557177 | -2.74928751  | 0.00801605   |
| SPATA2   | -1.526935632 | 0.130396688 | -0.921865543 | 0.360444217 | -1.317945479 | 0.192865406  |
| SPATA20  | 1.637720411  | 0.105084295 | 0.280912438  | 0.779784215 | 0.996660241  | 0.323198674  |
| SPATA24  | 0.87245033   | 0.385359073 | -1.781537101 | 0.080097159 | -1.363997559 | 0.178002854  |
| SPATA2L  | -0.561261153 | 0.576059261 | 1.40394328   | 0.165704935 | 0.452695475  | 0.652509685  |
| SPATA5   | 1.46636829   | 0.146145503 | -0.249119161 | 0.804154851 | 1.200594436  | 0.234941352  |
| SPATA5L1 | 0.096334223  | 0.923476217 | -0.629427942 | 0.531557761 | -0.680728716 | 0.498836463  |
| SPATA6   | -1.248988195 | 0.215012348 | -0.527170803 | 0.600099725 | -1.080521147 | 0.284522303  |
| SPATA7   | -0.2514763   | 0.802037653 | -1.86828458  | 0.066811666 | -1.792519748 | 0.07842899   |
| SPATC1   | 0.302727674  | 0.76281847  | -0.747369579 | 0.457880914 | -1.72245156  | 0.090483649  |
| SPATS2   | 1.067348324  | 0.288761047 | 0.09052328   | 0.928185472 | 1.278058903  | 0.20647886   |
| SPATS2L  | -2.258725378 | 0.026395292 | 0.64114958   | 0.523968623 | -1.461308782 | 0.149496049  |
| SPC25    | -0.575910109 | 0.566159525 | 2.027565031  | 0.047240232 | 2.763719465  | 0.007711102  |
| SPCS1    | -1.007228317 | 0.316612228 | -2.32843902  | 0.02342144  | -1.405549218 | 0.165358774  |
| SPCS2    | -1.428733938 | 0.156653523 | -1.032404966 | 0.306198129 | -0.914959744 | 0.364119356  |
| SPCS3    | 0.619972233  | 0.53689304  | -1.086846225 | 0.281632319 | -0.959778144 | 0.341275333  |
| SPDYA    | 1.951778311  | 0.054174269 | -1.026422186 | 0.30898413  | -0.454837945 | 0.650976831  |
| SPDYC    | -1.03415296  | 0.303924577 | -0.917409765 | 0.36275362  | -0.748926058 | 0.457022937  |
| SPDYE1   | 1.828523244  | 0.070890464 | -2.456218523 | 0.017078066 | -1.707195308 | 0.093301934  |
| SPDYE3   | 1.298067156  | 0.197687623 | 0.748761164  | 0.457048123 | 0.821879258  | 0.4146166    |
| SPDYE5   | 0.905635643  | 0.367624613 | -2.774381973 | 0.007443264 | -1.834238772 | 0.071910989  |
| SPDYE6   | 2.60658035   | 0.010754996 | 0.034119301  | 0.972899987 | 0.431476679  | 0.667771445  |
| SPECC1   | -4.014634287 | 0.00012567  | 2.573948227  | 0.012650258 | 2.289328446  | 0.025835871  |
| SPECC1L  | -0.757663774 | 0.450695206 | 1.324158007  | 0.190681508 | 1.179814333  | 0.243040909  |
| SPEF2    | 1.179874316  | 0.241259428 | -1.078339197 | 0.285377869 | 0.039235277  | 0.968841765  |
| SPEG     | 2.558849253  | 0.012227206 | -1.828647084 | 0.07263179  | -0.457230909 | 0.649266548  |
| SPEN     | -0.679842533 | 0.498405263 | -0.609415806 | 0.544645448 | -0.856115165 | 0.395567268  |
| SPG11    | 0.128120771  | 0.898348455 | 1.027008733  | 0.308710235 | 0.048930725  | 0.961147871  |
| SPG20    | -0.581943537 | 0.562106431 | 3.241700252  | 0.001977417 | 1.756889154  | 0.084379998  |
| SPG21    | -3.473286199 | 0.000802686 | -0.506439444 | 0.614481396 | -0.269620386 | 0.788439185  |
| SPG7     | 0.94166828   | 0.348964319 | 1.359358506  | 0.17933164  | 2.491688512  | 0.015688632  |

|          |              |             |              |             |              |             |
|----------|--------------|-------------|--------------|-------------|--------------|-------------|
| SPHAR    | -0.457431998 | 0.648498383 | -0.628319944 | 0.532278078 | -0.29853389  | 0.766396037 |
| SPHK1    | 0.089723049  | 0.928713088 | 1.425009302  | 0.159551034 | 0.678445615  | 0.500271559 |
| SPHK2    | -0.0993037   | 0.921125105 | -0.929721986 | 0.356395392 | -0.103168757 | 0.918196063 |
| SPI1     | -1.78915178  | 0.077062986 | -0.51461028  | 0.608794547 | -1.215760484 | 0.229155129 |
| SPIB     | -1.164414099 | 0.247432479 | 1.14055602   | 0.258775214 | 1.335428811  | 0.187116244 |
| SPICE1   | 1.886872128  | 0.062505317 | 0.579856209  | 0.564273072 | 0.390514122  | 0.697631805 |
| SPIN1    | 1.098201733  | 0.275139903 | -0.231589138 | 0.81767795  | -0.348337517 | 0.728887377 |
| SPIN2B   | 0.669107448  | 0.505194831 | 0.908360969  | 0.367472743 | 1.163664769  | 0.249473386 |
| SPIN3    | 1.358382229  | 0.177846811 | -0.180776657 | 0.857177495 | -0.63892692  | 0.525464339 |
| SPIN4    | 1.22153696   | 0.225175385 | -1.292665828 | 0.201288324 | -2.338150929 | 0.022960939 |
| SPINK2   | 0.10202989   | 0.918967236 | -1.516409869 | 0.13488534  | -1.547652342 | 0.127315597 |
| SPINT1   | -1.206131896 | 0.231029367 | 1.041844897  | 0.301837082 | 1.260087628  | 0.212841673 |
| SPINT2   | -0.758245308 | 0.450348866 | 0.455476578  | 0.650478906 | 0.765931539  | 0.446920028 |
| SPIRE1   | 1.801792959  | 0.075034306 | 0.328077054  | 0.744043094 | -0.619409841 | 0.538147861 |
| SPIRE2   | 1.448408572  | 0.151089589 | -1.599386312 | 0.115206537 | 0.708909764  | 0.481309054 |
| SPN      | -0.309524196 | 0.75766133  | 0.515839397  | 0.607941173 | 1.027004239  | 0.308815697 |
| SPNS1    | -0.212004795 | 0.832598111 | -0.25996613  | 0.795816966 | -0.033921322 | 0.973060004 |
| SPNS2    | -1.553651065 | 0.123890195 | -1.230537763 | 0.223497702 | -0.922640486 | 0.36013622  |
| SPNS3    | 1.653200158  | 0.101886617 | 0.669953784  | 0.505564452 | 0.934249089  | 0.354169674 |
| SPOCD1   | -3.65006243  | 0.000446192 | 0.556884873  | 0.579763667 | -1.20257101  | 0.234181275 |
| SPOCK1   | -1.166524717 | 0.246583169 | 0.362320915  | 0.718438308 | -0.081843815 | 0.935061514 |
| SPOCK2   | 0.696360512  | 0.488055376 | 1.696682997  | 0.095155236 | 2.380159219  | 0.020719369 |
| SPON1    | 2.893577966  | 0.00481027  | -0.901659644 | 0.370992795 | -0.436684475 | 0.664012301 |
| SPON2    | 1.169794454  | 0.245271537 | -2.849203089 | 0.006069337 | -1.607619639 | 0.1135191   |
| SPOP     | -2.192234255 | 0.031026709 | 2.430561584  | 0.018211435 | -2.046984827 | 0.045343024 |
| SPOPL    | -0.448920803 | 0.65460261  | -0.992732665 | 0.32499264  | -2.17233238  | 0.034061407 |
| SPP1     | -2.074839124 | 0.040949066 | -0.508373072 | 0.613133435 | -0.239957806 | 0.811235483 |
| SPPL2A   | 0.855574178  | 0.394578451 | 1.028325581  | 0.308095918 | 0.292958588  | 0.770632093 |
| SPPL2B   | 0.699392153  | 0.486166889 | 0.033019195  | 0.973773442 | 1.215874304  | 0.229112101 |
| SPPL3    | -3.214500968 | 0.001832828 | 1.867086054  | 0.066981695 | 1.678587396  | 0.098781536 |
| SPR      | -1.43125399  | 0.155932155 | 0.692457681  | 0.491432438 | -0.516774382 | 0.607340096 |
| SPRED1   | 3.371346287  | 0.001116682 | -1.755920653 | 0.084418277 | -1.443219407 | 0.154506133 |
| SPRED2   | -0.530368962 | 0.597204365 | -1.602078682 | 0.114609015 | -2.385993758 | 0.02042404  |
| SPRN     | 0.013683981  | 0.989113367 | 1.111702001  | 0.270885258 | 1.273776249  | 0.207982133 |
| SPRY1    | 0.536370193  | 0.593068625 | -1.313477527 | 0.194230438 | -0.648220544 | 0.519480357 |
| SPRY2    | -0.213460311 | 0.831466298 | -2.404044514 | 0.019453377 | -1.114849627 | 0.269656587 |
| SPRY3    | -1.563125506 | 0.121645601 | -0.996151628 | 0.323343205 | -2.601308273 | 0.011846874 |
| SPRYD3   | -1.129422158 | 0.261817548 | 0.227391048  | 0.820924912 | 0.713296629  | 0.478611897 |
| SPRYD4   | 0.562240666  | 0.575394722 | -1.457981536 | 0.150277073 | -0.446132801 | 0.657214384 |
| SPRYD7   | 0.864647795  | 0.389604811 | -1.287592605 | 0.203037566 | -1.070197739 | 0.289102155 |
| SPSB1    | -0.955980099 | 0.341725453 | -1.264097199 | 0.211287063 | -1.533703717 | 0.13070958  |
| SPSB2    | -1.123549303 | 0.264288357 | 1.054839366  | 0.295903615 | -0.829248937 | 0.410469604 |
| SPSB3    | -0.360667869 | 0.719220093 | -0.595928472 | 0.553557771 | -0.236907293 | 0.813589579 |
| SPTA1    | -3.608947766 | 0.000512324 | 1.633971561  | 0.107719724 | -0.001060041 | 0.999157962 |
| SPTAN1   | 0.034531336  | 0.972532387 | 1.996808379  | 0.050579189 | 2.386010378  | 0.020423204 |
| SPTB     | -2.680302922 | 0.008794165 | -2.22354712  | 0.030116065 | -0.655868679 | 0.514583094 |
| SPTBN1   | 2.081876264  | 0.04028516  | 1.505984605  | 0.137536141 | 1.60358901   | 0.114406877 |
| SPTBN2   | 1.393635306  | 0.16697001  | 1.667119171  | 0.100919932 | 2.019105838  | 0.048252729 |
| SPTBN4   | 1.192872256  | 0.236155516 | 0.248300848  | 0.804784816 | 1.562118169  | 0.123870516 |
| SPTBN5   | 2.301268486  | 0.023761197 | -0.176922849 | 0.860189671 | 0.579195801  | 0.564769997 |
| SPTLC1   | -0.003914551 | 0.996885591 | 0.431790473  | 0.667505814 | -0.337801071 | 0.736770842 |
| SPTLC2   | -2.112986918 | 0.037460206 | 2.079906228  | 0.041994664 | 1.518511516  | 0.134487729 |
| SPTLC3   | 0.183938178  | 0.854489071 | 0.201383023  | 0.841108618 | -0.325998207 | 0.74563572  |
| SPTSSA   | -0.764387466 | 0.446700199 | -1.515562507 | 0.135099272 | -1.945365812 | 0.056736245 |
| SPTSSB   | 0.678225989  | 0.499424504 | -2.547055012 | 0.013558194 | -3.330431369 | 0.00153583  |
| SPTY2D1  | -0.397704847 | 0.691819812 | 0.349537951  | 0.727960298 | -0.954722726 | 0.343803946 |
| SQLE     | 6.678372741  | 2.16E-09    | -0.742435377 | 0.460840807 | -0.025549757 | 0.979706909 |
| SQRDL    | -2.599923346 | 0.010950216 | 1.677693761  | 0.098825999 | 1.07259184   | 0.288035525 |
| SQSTM1   | -2.220704209 | 0.028963163 | 1.541842406  | 0.128588608 | 1.548749501  | 0.12705165  |
| SRA1     | -1.90002374  | 0.060735179 | 0.414796087  | 0.679832161 | 0.975096219  | 0.333688396 |
| SRBD1    | -1.900044842 | 0.060732373 | 1.621947338  | 0.110276546 | 0.570025129  | 0.570930994 |
| SRC      | -0.951335278 | 0.344063999 | 1.030211747  | 0.307217456 | 0.880836791  | 0.382155182 |
| SRCAP    | -0.864289582 | 0.389800425 | -0.235543541 | 0.814622398 | 0.004660476  | 0.996297985 |
| SRCRB4D  | -0.850166874 | 0.397560923 | 0.473335959  | 0.637762629 | 0.641491931  | 0.523809168 |
| SRD5A1   | 0.411453961  | 0.681749358 | -0.494002634 | 0.623183084 | 0.178752325  | 0.858774604 |
| SRD5A3   | 0.134846955  | 0.893043691 | 0.053597738  | 0.957441133 | 0.569943143  | 0.570986222 |
| SREBF1   | -0.651442498 | 0.516474302 | -0.211120234 | 0.833538656 | -0.273290347 | 0.785631194 |
| SREBF2   | 2.653728854  | 0.009460057 | 0.072003166  | 0.942848839 | -0.084814102 | 0.932710402 |
| SREK1    | 1.598048291  | 0.113650213 | -0.118678708 | 0.905942854 | -1.109842631 | 0.271790098 |
| SREK1IP1 | 1.42488709   | 0.157759648 | -1.055783429 | 0.295475685 | -1.156075651 | 0.252538024 |
| SRF      | -0.419687408 | 0.675746172 | -0.676505795 | 0.501427381 | -0.941187941 | 0.350634063 |
| SRFBP1   | 0.172989574  | 0.863060582 | 0.502767243  | 0.617045019 | 0.006407451  | 0.994910304 |

|          |              |             |              |             |              |             |
|----------|--------------|-------------|--------------|-------------|--------------|-------------|
| SRGAP2   | -2.542564363 | 0.012769607 | 0.445357535  | 0.657730828 | 0.134397945  | 0.893567754 |
| SRGAP2P2 | -0.319756326 | 0.749918002 | 0.78122257   | 0.43787099  | -0.381026035 | 0.704619599 |
| SRGAP3   | 0.383522287  | 0.702266137 | 0.49532185   | 0.622257472 | 0.229017412  | 0.819686215 |
| SRGN     | -2.434497161 | 0.016951228 | 0.058626572  | 0.953452478 | -0.964276505 | 0.339035653 |
| SRI      | -2.036099446 | 0.044775169 | -1.423330811 | 0.160034767 | -2.245226734 | 0.028703037 |
| SRM      | 0.181254414  | 0.856588578 | 0.840258026  | 0.40423832  | 0.766010895  | 0.44687319  |
| SRP14    | 0.589388047  | 0.557125146 | -1.034799709 | 0.305087772 | -0.704898253 | 0.483782852 |
| SRP19    | 0.182295748  | 0.85577382  | -1.933868024 | 0.05804823  | -1.987932935 | 0.051695586 |
| SRP54    | 0.935261854  | 0.352236538 | 0.30256522   | 0.763311233 | 1.042749994  | 0.301526069 |
| SRP68    | -0.442287529 | 0.65937636  | 1.420717558  | 0.160790157 | 1.982155474  | 0.052356343 |
| SRP72    | 1.550932588  | 0.124540266 | -0.124564629 | 0.901301961 | 0.483460156  | 0.630646149 |
| SRP9     | 0.457805168  | 0.648231291 | -0.221144766 | 0.825761839 | -0.269418448 | 0.788593776 |
| SRPK1    | -0.921620084 | 0.359269958 | -0.358172816 | 0.721523385 | -0.508952095 | 0.612776934 |
| SRPK2    | -1.875463515 | 0.064075825 | -0.592398104 | 0.55590266  | -1.765217537 | 0.082956395 |
| SRPK3    | 0.171432576  | 0.864280892 | -0.276064013 | 0.783487042 | -0.954478421 | 0.343926452 |
| SRPR     | -0.836411586 | 0.405209922 | 0.734138101  | 0.465842781 | 0.915009543  | 0.36409344  |
| SRPRB    | 0.158439233  | 0.874477099 | 3.599038844  | 0.000665067 | 4.288070818  | 7.15E-05    |
| SRR      | 0.092879528  | 0.926212358 | 0.64458604   | 0.521754551 | 1.348413299  | 0.182931255 |
| SRRD     | -3.591830164 | 0.000542512 | 0.1377708    | 0.890902076 | 1.082596907  | 0.283607538 |
| SRRM1    | 0.594414572  | 0.553774203 | -0.306650379 | 0.760215366 | -0.010461591 | 0.991690035 |
| SRRM2    | 0.521400667  | 0.603409595 | -0.353936864 | 0.724678607 | 0.328222361  | 0.743962517 |
| SRRM5    | 1.51613014   | 0.133103764 | 0.088455622  | 0.929821401 | 1.047788426  | 0.299218527 |
| SRRT     | -0.052856487 | 0.957967172 | 0.98662064   | 0.327955286 | 2.012557182  | 0.048959116 |
| SRSF1    | 2.856206373  | 0.005358611 | -0.322535551 | 0.748214911 | -0.604098283 | 0.548207662 |
| SRSF10   | 0.818373626  | 0.415374945 | -0.663913293 | 0.509394819 | -1.521935618 | 0.133628707 |
| SRSF11   | 2.314646998  | 0.022982222 | -0.773083384 | 0.442634242 | -1.0656603   | 0.291131183 |
| SRSF12   | 0.121831055  | 0.903313177 | 0.989161454  | 0.326721515 | 0.972955507  | 0.33474191  |
| SRSF2    | 2.611815163  | 0.0106037   | -0.058792012 | 0.953321278 | -0.286466608 | 0.775573491 |
| SRSF3    | -1.067587385 | 0.288653759 | 1.40541075   | 0.165270396 | 1.03645327   | 0.304426955 |
| SRSF4    | -1.340510462 | 0.183561928 | 0.702790461  | 0.485017284 | 0.6328022    | 0.52942763  |
| SRSF5    | 0.098991203  | 0.921372495 | -0.558571517 | 0.578619354 | 0.524600712  | 0.601922682 |
| SRSF6    | 1.631422215  | 0.106408303 | 0.509075498  | 0.612644095 | 0.760261552  | 0.450273975 |
| SRSF7    | 0.140429657  | 0.888644445 | -0.35769584  | 0.721878428 | -0.545420056 | 0.587621536 |
| SRSF8    | 1.002174513  | 0.319032583 | -1.133972197 | 0.261503981 | -1.177641687 | 0.243899252 |
| SRSF9    | -1.860231032 | 0.066224277 | -0.872559582 | 0.386526295 | -1.519882638 | 0.134143224 |
| SRXN1    | -3.660329251 | 0.000430989 | 1.070495183  | 0.288862002 | 0.440073579  | 0.661570591 |
| SS18     | 1.507146362  | 0.135387975 | 0.97188991   | 0.335169298 | 1.439962236  | 0.15542201  |
| SS18L1   | 1.606550648  | 0.11176878  | -1.483983311 | 0.143265522 | -3.304771012 | 0.001658225 |
| SS18L2   | 0.179700712  | 0.857804511 | -0.8945805   | 0.374734553 | -0.513947243 | 0.609302532 |
| SSB      | 0.773590123  | 0.441265638 | 0.76023642   | 0.45021416  | 1.487205668  | 0.142546228 |
| SSBP1    | 0.771493501  | 0.442500383 | 0.786287911  | 0.434921963 | 2.138861561  | 0.036803168 |
| SSBP2    | -0.58029198  | 0.563214484 | -2.068980288 | 0.043045857 | -2.189943876 | 0.032692039 |
| SSBP3    | -1.810037356 | 0.073735282 | -0.95432334  | 0.343908205 | -0.510123986 | 0.611961012 |
| SSBP4    | 0.050255797  | 0.9600335   | -3.401827227 | 0.001222781 | -3.033487074 | 0.003654622 |
| SSC5D    | 0.658081502  | 0.512219626 | 0.760041707  | 0.450329621 | 1.04269786   | 0.301550009 |
| SSFA2    | -0.725103065 | 0.470330412 | -0.310567182 | 0.757250781 | -1.497524052 | 0.139849107 |
| SSH1     | -1.075182984 | 0.285259168 | 0.158985162  | 0.874236735 | 0.374392477  | 0.70952038  |
| SSH2     | -1.754737543 | 0.08281723  | 0.216616031  | 0.829273011 | -0.366176266 | 0.715607534 |
| SSH3     | 0.013236369  | 0.989469455 | -1.970745414 | 0.053565498 | -1.4318665   | 0.157716761 |
| SSNA1    | -1.172529101 | 0.244178382 | -0.744384488 | 0.459670278 | -0.861486532 | 0.392628594 |
| SSPN     | -0.007046264 | 0.994394039 | -2.002097837 | 0.049990909 | -2.519061673 | 0.014636071 |
| SSPO     | 1.995870234  | 0.04906906  | 0.274829744  | 0.784430483 | 0.952927251  | 0.344704953 |
| SSR1     | 0.36031181   | 0.719485367 | 0.339033346  | 0.735817611 | 0.180222778  | 0.857625544 |
| SSR2     | 0.2694356    | 0.788231111 | 0.523733914  | 0.602473125 | 0.950285069  | 0.346033666 |
| SSR3     | -0.713825472 | 0.477241644 | 0.031958587  | 0.974615567 | 1.614325866  | 0.112054358 |
| SSR4     | -0.97379526  | 0.332852181 | -2.119036209 | 0.038410747 | -1.123668614 | 0.265927514 |
| SSRP1    | 0.651069479  | 0.516713907 | 2.101219623  | 0.040008103 | 2.812547598  | 0.006756791 |
| SSSCA1   | 0.84574111   | 0.400012272 | -1.159729632 | 0.250943965 | -0.340612466 | 0.734664505 |
| SSTR3    | 2.045963346  | 0.043772943 | 0.123199042  | 0.902378388 | -0.466459456 | 0.642688615 |
| SSU72    | -2.561090325 | 0.01215421  | -0.173773264 | 0.862652972 | -0.366637565 | 0.715265274 |
| SSX2IP   | 0.255730196  | 0.798761526 | -0.923611341 | 0.359541967 | -0.955044051 | 0.343642861 |
| ST13     | -0.272794814 | 0.785656006 | 3.433075101  | 0.001111665 | 3.883600771  | 0.000273221 |
| ST14     | -0.793223146 | 0.429801162 | 4.209545099  | 9.08E-05    | 2.76030624   | 0.007782244 |
| ST20     | -1.461946034 | 0.147351051 | -1.242873415 | 0.218950472 | -0.023551028 | 0.981294104 |
| ST3GAL1  | -0.501983212 | 0.616944675 | 1.341484739  | 0.185028678 | 1.364433334  | 0.177866517 |
| ST3GAL2  | -1.440991677 | 0.153168807 | -0.895932335 | 0.374018183 | -1.607027433 | 0.113649188 |
| ST3GAL3  | 0.178310883  | 0.858892488 | 0.839742533  | 0.404524967 | -0.158375359 | 0.874728382 |
| ST3GAL4  | -1.270735878 | 0.207202766 | 0.318261325  | 0.751437865 | -0.253721206 | 0.800636278 |
| ST3GAL5  | 1.26560714   | 0.209025359 | 0.019118159  | 0.984812921 | 1.322018348  | 0.191514328 |
| ST3GAL6  | 1.169784564  | 0.245275496 | -0.506602492 | 0.61436768  | -0.516573776 | 0.607479249 |
| ST5      | 1.284093269  | 0.202511082 | 0.610054703  | 0.544225092 | 0.061862016  | 0.950892057 |
| ST6GAL1  | 0.077648526  | 0.938285558 | 1.639725667  | 0.106513327 | 1.833461987  | 0.072028055 |

|            |              |             |              |             |              |             |
|------------|--------------|-------------|--------------|-------------|--------------|-------------|
| ST6GALNAC1 | 1.725686992  | 0.087946226 | 2.570037276  | 0.012778769 | 1.8309351    | 0.072409983 |
| ST6GALNAC2 | -3.00202709  | 0.003498079 | -1.064940037 | 0.291347196 | -1.580830659 | 0.119525348 |
| ST6GALNAC3 | -0.694218591 | 0.489390779 | -0.444772793 | 0.65815091  | -1.868976684 | 0.066837045 |
| ST6GALNAC4 | -2.36621838  | 0.020186535 | 0.220787968  | 0.826038339 | -0.648487068 | 0.519309281 |
| ST6GALNAC6 | 0.94413763   | 0.347708306 | -0.699427419 | 0.487100121 | 0.295259847  | 0.768882761 |
| ST7        | -2.020553955 | 0.046394627 | -0.363094856 | 0.717863222 | -0.265807707 | 0.791359366 |
| ST7L       | -0.44798168  | 0.655277599 | 0.576466144  | 0.566546234 | 0.398936877  | 0.69145057  |
| ST8SIA1    | 1.298703886  | 0.197469893 | -0.104344434 | 0.917258525 | 0.291145055  | 0.77201152  |
| ST8SIA4    | -0.202488912 | 0.840006281 | -0.903167074 | 0.37019911  | -2.303215547 | 0.024987224 |
| ST8SIA6    | 1.116019935  | 0.267479951 | -2.515494373 | 0.014698787 | -3.637623053 | 0.000598665 |
| STAB1      | 0.458234566  | 0.647924011 | 1.459354356  | 0.149900288 | 1.449942641  | 0.152628962 |
| STAC3      | -1.789737341 | 0.07696802  | 2.018821669  | 0.048169501 | 1.783829978  | 0.079847038 |
| STAG1      | 1.076242249  | 0.284787957 | 0.994682196  | 0.324051427 | 0.603587885  | 0.548544633 |
| STAG2      | 0.312728643  | 0.75523361  | -0.087054374 | 0.930930242 | -1.320026044 | 0.192174332 |
| STAG3      | 0.175327919  | 0.86122851  | 0.0416714    | 0.966904775 | 0.360805646  | 0.71959656  |
| STAG3L1    | 1.00880106   | 0.315861521 | 0.523881209  | 0.602371319 | 0.668106237  | 0.506798675 |
| STAG3L2    | 0.695504092  | 0.488589079 | 0.377588731  | 0.707124    | 0.909486011  | 0.366975158 |
| STAG3L3    | 1.111413125  | 0.269445953 | -0.67933254  | 0.499648215 | 1.707328459  | 0.093277027 |
| STAG3L4    | 1.952406277  | 0.054098509 | -2.014453445 | 0.048639642 | -1.764524207 | 0.083074141 |
| STAM       | -1.85465499  | 0.067025696 | -0.933533192 | 0.354441921 | -1.630819676 | 0.108516918 |
| STAM2      | 0.341286388  | 0.733709107 | -0.986832344 | 0.327852369 | -2.247258509 | 0.028565004 |
| STAMBP     | -1.892115134 | 0.061794499 | -2.313955827 | 0.024259102 | -1.670825215 | 0.100313    |
| STAMBP11   | 2.621390321  | 0.010331932 | -0.644483686 | 0.521820425 | -1.069527844 | 0.289401098 |
| STAP1      | 1.960621672  | 0.053115635 | -0.084661399 | 0.932824176 | 0.278465427  | 0.781676464 |
| STAP2      | 0.410090518  | 0.682745468 | 1.442735588  | 0.154511461 | 2.351067719  | 0.022249688 |
| STAR       | -1.32046912  | 0.19013424  | 0.717056402  | 0.47623722  | 1.555347392  | 0.125473585 |
| STARD10    | -1.221341296 | 0.225249056 | -1.260873135 | 0.212438206 | -0.660232431 | 0.51179997  |
| STARD13    | -0.721450592 | 0.472562576 | 1.731642657  | 0.088690571 | 1.970927081  | 0.053661268 |
| STARD3     | -1.763841725 | 0.081261531 | -0.476307366 | 0.635657361 | 0.470066277  | 0.640125503 |
| STARD3NL   | -0.512602634 | 0.609525519 | -1.483903816 | 0.143286559 | -1.34763874  | 0.183178887 |
| STARD4     | 2.138359078  | 0.035284895 | -0.624354531 | 0.53486017  | -2.383272893 | 0.020561291 |
| STARD5     | -1.979812549 | 0.050878657 | 0.14336007   | 0.886506201 | 0.447641218  | 0.656131775 |
| STARD7     | 2.114464575  | 0.037330405 | 2.114391482  | 0.03882172  | 2.829828251  | 0.006446033 |
| STARD8     | -0.356220668 | 0.722535848 | 1.299007659  | 0.199117562 | 0.524294485  | 0.602134232 |
| STARD9     | 3.647420617  | 0.000450185 | -1.254607115 | 0.214688758 | 0.151218495  | 0.880344505 |
| STAT1      | -0.653663915 | 0.515048612 | 0.723354143  | 0.472389853 | -1.540747092 | 0.128986882 |
| STAT2      | -1.27831324  | 0.20453152  | 1.31099939   | 0.195060945 | -0.717036681 | 0.476319129 |
| STAT3      | -2.28775171  | 0.024571794 | 0.410779844  | 0.682758249 | -0.257418783 | 0.797795093 |
| STAT4      | 2.175429808  | 0.032304036 | -1.492793647 | 0.140949045 | -0.226524298 | 0.821615031 |
| STAT5A     | -1.364952612 | 0.175779923 | 2.176103523  | 0.033662955 | 1.486198875  | 0.142811575 |
| STAT5B     | -0.194038828 | 0.84659685  | 0.374593603  | 0.709338426 | 0.102494441  | 0.918728828 |
| STAT6      | -2.116190472 | 0.037179291 | 0.552026567  | 0.583065884 | 0.822261856  | 0.414400683 |
| STAU1      | -2.515401328 | 0.013722673 | 1.74977162   | 0.085483858 | 1.022718276  | 0.310820469 |
| STAU2      | -1.041651879 | 0.300452892 | -0.638201266 | 0.52587212  | -2.435341101 | 0.0180732   |
| STBD1      | 1.259483671  | 0.211216889 | -2.772509938 | 0.007481052 | -2.793582996 | 0.007113703 |
| STEAP2     | -0.258852975 | 0.796358814 | 1.622664508  | 0.11012268  | 0.725299728  | 0.4712756   |
| STEAP3     | 0.529380139  | 0.597887089 | 0.379611115  | 0.7056302   | 0.271896474  | 0.78669735  |
| STEAP4     | -0.629456126 | 0.530696429 | -0.347657621 | 0.729364636 | -0.792925334 | 0.431153937 |
| STIL       | 1.265628145  | 0.209017871 | 0.256455741  | 0.798512777 | 0.271952128  | 0.786654774 |
| STIM1      | -1.109081856 | 0.27044468  | 0.895365298  | 0.374318563 | 1.272592522  | 0.208399072 |
| STIM2      | -0.172383598 | 0.863535482 | -0.769466213 | 0.444760824 | -0.921431674 | 0.360761226 |
| STIP1      | -1.196113767 | 0.234894859 | 0.887827711  | 0.378326041 | 1.017590114  | 0.313230745 |
| STK10      | -1.778582463 | 0.078793883 | 0.894476785  | 0.37478955  | 1.129447271  | 0.263503888 |
| STK11      | 0.212459341  | 0.832244617 | -0.506296572 | 0.614581046 | -0.781062845 | 0.438041237 |
| STK11IP    | -0.294553764 | 0.769034955 | 1.933380218  | 0.058109609 | 2.842339268  | 0.006229344 |
| STK16      | -2.216645924 | 0.02924977  | -1.376005546 | 0.174146898 | -0.668527214 | 0.506532023 |
| STK17A     | -0.344159416 | 0.731555068 | 0.882738864  | 0.381046881 | 1.215880689  | 0.229109688 |
| STK17B     | 0.804074006  | 0.423541159 | -0.91250526  | 0.365306563 | -1.327388286 | 0.189743922 |
| STK19      | -1.517102336 | 0.132858404 | 0.974402286  | 0.333931558 | 1.097118755  | 0.277265127 |
| STK24      | -2.337371008 | 0.021710715 | 2.117632756  | 0.038534524 | 2.073680954  | 0.042700353 |
| STK25      | 0.540078149  | 0.590519983 | -1.379833294 | 0.172971144 | -0.685528545 | 0.495826759 |
| STK3       | -0.29974315  | 0.765086504 | 0.601954047  | 0.54956707  | 0.202434771  | 0.840307432 |
| STK32B     | -0.771369738 | 0.442573332 | -1.085769332 | 0.282104562 | 0.310447957  | 0.757368    |
| STK32C     | 0.180149281  | 0.857453424 | 1.376210641  | 0.174083745 | 2.057526676  | 0.044283021 |
| STK33      | 2.589177905  | 0.011272097 | 2.529116868  | 0.014196228 | 1.7893197    | 0.078948725 |
| STK35      | 0.822309051  | 0.413144218 | -0.702678034 | 0.485086833 | -0.639778884 | 0.524914272 |
| STK36      | 0.722426186  | 0.471965774 | 1.269329961  | 0.209428581 | 1.653575493  | 0.103785964 |
| STK38      | -0.322990703 | 0.747475615 | 1.889605259  | 0.063847443 | 2.740968591  | 0.008196828 |
| STK38L     | -0.333743951 | 0.739374128 | -0.721997506 | 0.473217152 | -1.756813003 | 0.084393108 |
| STK39      | 1.687093118  | 0.095160234 | 0.094730141  | 0.924857975 | 1.251315822  | 0.215999672 |
| STK4       | -1.433821927 | 0.15519972  | 0.71384137   | 0.478208097 | 0.81475939   | 0.418647089 |
| STK40      | -3.620986541 | 0.000492055 | 0.532293578  | 0.59657019  | 0.754901311  | 0.453458123 |

|              |              |              |              |             |              |             |
|--------------|--------------|--------------|--------------|-------------|--------------|-------------|
| STMN1        | 1.46850886   | 0.145564728  | 2.690580906  | 0.009318273 | 4.959118566  | 6.88E-06    |
| STMN3        | 1.575172155  | 0.118838475  | -0.107974805 | 0.914390939 | 0.949447794  | 0.346455418 |
| STOM         | -1.0812103   | 0.282585082  | -0.784243737 | 0.436110656 | -1.636955526 | 0.107224332 |
| STOML1       | 0.268142384  | 0.789223094  | 0.437224761  | 0.663583368 | 0.914783849  | 0.364210903 |
| STOML2       | -1.554443382 | 0.123701236  | 2.624302315  | 0.011097354 | 2.796358431  | 0.007060406 |
| STON1        | -1.980600418 | 0.050788561  | -1.542563069 | 0.128413656 | -1.074997088 | 0.286966676 |
| STOX1        | 0.814218854  | 0.417737844  | -1.308273961 | 0.19597741  | -2.400766942 | 0.01969305  |
| STRA13       | 0.120668046  | 0.904231613  | 0.687622028  | 0.494450662 | 0.799565285  | 0.427327124 |
| STRADA       | 0.402084484  | 0.688605846  | 1.077357083  | 0.285812498 | 1.900849216  | 0.062451169 |
| STRADB       | -3.465790367 | 0.000822587  | 0.208966647  | 0.835211574 | 0.126713932  | 0.899618794 |
| STRAP        | 0.079214781  | 0.937043316  | 3.953489971  | 0.000213131 | 3.777151469  | 0.000384846 |
| STRBP        | 0.580646327  | 0.562976657  | 0.879724505  | 0.38266436  | 0.886889914  | 0.378915354 |
| STRC         | -0.245366814 | 0.806749043  | 0.596033423  | 0.553488138 | 0.952238735  | 0.345050875 |
| STRN         | -0.14577438  | 0.884435994  | -1.177882631 | 0.243687378 | -1.83968753  | 0.071094317 |
| STRN3        | 0.583369989  | 0.561150268  | -0.747197474 | 0.45798397  | -1.874924245 | 0.065999394 |
| STRN4        | -1.417431048 | 0.15992069   | -1.136098235 | 0.260620589 | -0.776073574 | 0.440957286 |
| STS          | -3.028767578 | 0.003229985  | 0.084088356  | 0.933277772 | -0.382645585 | 0.703424998 |
| STT3A        | 0.266369002  | 0.790583961  | 0.35955726   | 0.720493209 | 0.330717289  | 0.742087091 |
| STT3B        | 1.947115246  | 0.054739659  | 0.867713254  | 0.389152284 | 0.220780353  | 0.826063076 |
| STUB1        | -0.403806267 | 0.687343889  | 0.690455019  | 0.492681188 | 0.665486969  | 0.508459452 |
| STX10        | -1.575740443 | 0.118707338  | -1.5757338   | 0.120564468 | -1.536192441 | 0.130098796 |
| STX11        | -3.569104263 | 0.000585201  | -1.385781321 | 0.17115621  | -2.68210739  | 0.009586793 |
| STX12        | -0.008865202 | 0.992946938  | 0.799403344  | 0.427341086 | 0.250430718  | 0.803166694 |
| STX16        | 0.460825637  | 0.646071121  | 1.006606628  | 0.31833412  | 1.269314486  | 0.209556927 |
| STX16-NPEPL1 | 0.77608544   | 0.439798714  | -0.904986846 | 0.369242415 | -0.666066835 | 0.508091529 |
| STX17        | 1.014062122  | 0.31335894   | -1.109346042 | 0.271891377 | -0.586207909 | 0.560081413 |
| STX18        | 1.445044888  | 0.152029822  | 0.663355759  | 0.509749144 | 2.532145651  | 0.014155897 |
| STX1A        | -0.849816367 | 0.397754726  | -1.510975747 | 0.136261959 | 0.473577782  | 0.637634354 |
| STX1B        | 3.187402677  | 0.001993528  | 1.508073236  | 0.137001795 | 2.133933547  | 0.037222736 |
| STX2         | 1.846851701  | 0.068160849  | -0.544040575 | 0.588513482 | 0.080539651  | 0.936094002 |
| STX3         | -1.069563164 | 0.287768098  | -0.588770549 | 0.558317274 | -1.356896958 | 0.180235635 |
| STX4         | -1.010473462 | 0.31506455   | 0.66533802   | 0.508489975 | 1.197987357  | 0.235946626 |
| STX5         | -1.994505979 | 0.049220638  | 0.032663941  | 0.974055511 | -0.022196866 | 0.98236949  |
| STX6         | -1.287531325 | 0.20131633   | 1.120485783  | 0.26715721  | 0.180663845  | 0.85728094  |
| STX7         | -0.077280497 | 0.9385577474 | -0.705554441 | 0.483309178 | -1.957938598 | 0.055205434 |
| STX8         | 0.821644958  | 0.413520141  | 1.001944681  | 0.320561223 | 1.837647102  | 0.071399222 |
| STXBP1       | 2.789947116  | 0.006473937  | 1.06625452   | 0.290757811 | 1.656205284  | 0.103250242 |
| STXBP2       | -2.427523012 | 0.01725903   | 0.309595564  | 0.757985848 | 0.289897071  | 0.772961203 |
| STXBP3       | 0.505555763  | 0.614444252  | 0.502938482  | 0.616925368 | -0.532496159 | 0.596480205 |
| STXBP4       | 1.390110175  | 0.168034208  | -0.860441313 | 0.393113438 | -0.842855879 | 0.402879636 |
| STXBP5       | 0.090115235  | 0.928402338  | -0.451493591 | 0.653329356 | -1.438545776 | 0.155821619 |
| STYK1        | 1.83883214   | 0.069344174  | -0.836260517 | 0.406464447 | -1.380749022 | 0.172819201 |
| STYX         | 0.790870632  | 0.431165535  | -0.776402362 | 0.440688232 | -1.385335678 | 0.17142029  |
| STYXL1       | -1.5021421   | 0.136673652  | 1.766525541  | 0.082606453 | 1.159929093  | 0.250978576 |
| SUB1         | 0.641441098  | 0.522918814  | 0.098676282  | 0.921737924 | -0.014709536 | 0.988315973 |
| SUCLA2       | 1.669147361  | 0.098675244  | 0.355221548  | 0.723721178 | 1.047787981  | 0.299218731 |
| SUCLG1       | -0.279748285 | 0.780333221  | 0.3569445    | 0.72243782  | 1.198913     | 0.235589347 |
| SUCLG2       | 0.360817532  | 0.7191086    | 0.623204191  | 0.535610429 | 0.770607992  | 0.444164797 |
| SUDS3        | -0.00324124  | 0.997421274  | -1.556769796 | 0.125003372 | 0.662613418  | 0.510284826 |
| SUFU         | -0.589756881 | 0.556878921  | 2.019205475  | 0.04812838  | 1.693399178  | 0.095912389 |
| SUGP1        | -1.026288555 | 0.307594481  | 0.544095194  | 0.588476142 | 1.367650936  | 0.176862319 |
| SUGP2        | 3.188218113  | 0.001988506  | 0.355330227  | 0.723640204 | 0.954687631  | 0.343821542 |
| SUGT1        | -0.010525004 | 0.991626462  | 1.660844968  | 0.102179375 | 2.267256586  | 0.027237408 |
| SUGT1P3      | -1.528872036 | 0.129916189  | 0.02284219   | 0.981855107 | -1.157207248 | 0.252079361 |
| SULF2        | -2.892660935 | 0.004823083  | 0.637421059  | 0.526376446 | -0.450590215 | 0.654017385 |
| SULT1A1      | 0.118484455  | 0.905956362  | 0.678973469  | 0.499874024 | 1.271008873  | 0.208957846 |
| SULT1A2      | -0.864151713 | 0.389875728  | 0.924992149  | 0.358829381 | 1.055655135  | 0.295639919 |
| SULT1B1      | -0.922281018 | 0.358927138  | 0.529927279  | 0.598199339 | -1.515315423 | 0.135293499 |
| SUMF1        | -0.062792952 | 0.950075109  | -0.311402113 | 0.756619303 | -1.436824955 | 0.15630817  |
| SUMF2        | -0.184054857 | 0.854397816  | 2.925971183  | 0.00490644  | 3.362627027  | 0.001394326 |
| SUMO1        | -1.005470637 | 0.317452618  | 0.134492319  | 0.893482162 | 0.844619802  | 0.401902079 |
| SUMO1P1      | -0.325207057 | 0.745803459  | -1.543870248 | 0.128096803 | -0.645215661 | 0.521411184 |
| SUMO2        | -0.167314643 | 0.867509937  | -1.422421451 | 0.160297315 | -0.871870699 | 0.386986075 |
| SUMO3        | 0.569312345  | 0.570607994  | -1.80988017  | 0.075532629 | -0.380608902 | 0.704927403 |
| SUN1         | 3.601601033  | 0.00052508   | 0.946885649  | 0.347652856 | 1.165552991  | 0.248715047 |
| SUN2         | 0.058010316  | 0.953873156  | 0.676704259  | 0.501302355 | 1.379752029  | 0.173124436 |
| SUOX         | 0.151973016  | 0.879559329  | 2.118955339  | 0.038417869 | 2.240952835  | 0.028995321 |
| SUPT16H      | 0.919511817  | 0.360364895  | 2.553803612  | 0.013324965 | 2.140435121  | 0.03667007  |
| SUPT3H       | 1.612552212  | 0.110455842  | -1.1679195   | 0.247651153 | -0.177971511 | 0.859384883 |
| SUPT4H1      | -3.173009361 | 0.002084143  | -3.67849172  | 0.000517749 | -3.491341675 | 0.000942731 |
| SUPT5H       | -0.530168615 | 0.597342663  | 1.523312879  | 0.133152542 | 1.935777892  | 0.057927875 |
| SUPT6H       | -0.442769719 | 0.659028865  | 1.167428099  | 0.247847846 | 1.532087588  | 0.131107434 |

|          |              |             |              |             |              |             |
|----------|--------------|-------------|--------------|-------------|--------------|-------------|
| SUPT7L   | 1.629302277  | 0.106856971 | 0.315389453  | 0.753605889 | 1.215255476  | 0.229346111 |
| SUPV3L1  | 2.298961154  | 0.023897875 | 0.754933351  | 0.453364936 | 2.249600453  | 0.028406627 |
| SURF1    | -0.245814416 | 0.806403626 | 1.191787492  | 0.238232172 | 1.298564444  | 0.19939326  |
| SURF2    | -0.238275618 | 0.812226436 | 1.203992643  | 0.233517183 | 1.325252078  | 0.190446716 |
| SURF4    | -0.562384153 | 0.575297406 | 0.924550625  | 0.359057137 | 1.43597475   | 0.156548997 |
| SURF6    | 0.795249168  | 0.42862819  | 2.45639685   | 0.017070416 | 2.545244303  | 0.013689525 |
| SUSD1    | -2.225324133 | 0.028639889 | 1.262595313  | 0.21182273  | 0.111374169  | 0.9117162   |
| SUSD2    | 1.604982447  | 0.112113905 | -1.302527105 | 0.197920481 | -0.789567504 | 0.433096905 |
| SUSD3    | 0.606701853  | 0.545625369 | -0.233878256 | 0.815908808 | 0.779699867  | 0.438836715 |
| SUSD4    | 0.032939133  | 0.973798416 | 1.04457598   | 0.300583331 | 1.089010745  | 0.28079396  |
| SUV39H1  | -1.042827346 | 0.299911147 | 2.355983376  | 0.021899157 | 1.861242754  | 0.067939714 |
| SUV39H2  | 1.046873605  | 0.298051391 | 0.253351058  | 0.800899082 | -0.114399215 | 0.9093288   |
| SUV420H1 | 0.390291553  | 0.69727287  | 1.651467489  | 0.104085651 | 1.329367816  | 0.189094427 |
| SUV420H2 | -0.940620612 | 0.34949809  | -0.895848576 | 0.374062543 | -1.193605926 | 0.237643111 |
| SUZ12    | 0.401271731  | 0.68920185  | -0.798558818 | 0.427826841 | -1.242675853 | 0.219143944 |
| SUZ12P   | 1.959386925  | 0.053262381 | -0.36987305  | 0.712833646 | 1.617081878  | 0.111456857 |
| SV2A     | 1.143304033  | 0.256041897 | 1.543297961  | 0.128235445 | 2.114733766  | 0.038897521 |
| SV2B     | 0.201743898  | 0.840586897 | 1.160095713  | 0.250796113 | 0.149563263  | 0.881644288 |
| SVIL     | -0.852633666 | 0.396198619 | 0.509570908  | 0.612299078 | -0.154922033 | 0.87743748  |
| SVIP     | 0.376603108  | 0.70738353  | -1.385468482 | 0.171251301 | -1.533119663 | 0.13085325  |
| SWAP70   | 0.600426069  | 0.549779856 | 2.343816511  | 0.022560342 | 1.755569528  | 0.08460742  |
| SWI5     | -1.809914547 | 0.073754494 | 0.526952554  | 0.600250312 | 1.479528897  | 0.144579332 |
| SWT1     | 0.098767613  | 0.921549506 | -0.4442832   | 0.658502722 | -0.477393288 | 0.634932296 |
| SYAP1    | -3.116234717 | 0.002480367 | 2.741592011  | 0.008131223 | 3.142545399  | 0.002672129 |
| SYBU     | -0.219672224 | 0.826639924 | -1.318566233 | 0.192533396 | -0.392447869 | 0.696210839 |
| SYCE1    | 0.279205259  | 0.780748527 | -0.781643737 | 0.437625338 | 0.817525356  | 0.417078497 |
| SYCE1L   | 1.411569546  | 0.161635505 | -0.97947741  | 0.331440502 | 0.336239978  | 0.737941314 |
| SYCE2    | 1.339414527  | 0.183916844 | 0.146069702  | 0.884376397 | 0.582225154  | 0.562742069 |
| SYCP2    | 1.383923518  | 0.169914404 | -0.343090186 | 0.73277973  | -1.092817258 | 0.279133377 |
| SYCP2L   | 0.633586831  | 0.528009089 | 0.94535802   | 0.348425253 | -0.85819138  | 0.394429757 |
| SYCP3    | 0.722262555  | 0.472065842 | 0.014538432  | 0.988450661 | -0.628571695 | 0.532174268 |
| SYDE2    | 0.756197776  | 0.451568982 | 2.035537402  | 0.046406433 | 1.173887363  | 0.245387616 |
| SYF2     | -2.008045195 | 0.047733909 | 0.158756084  | 0.8744164   | 0.002129982  | 0.998308059 |
| SYK      | -1.832708579 | 0.070259248 | 1.094854827  | 0.278137625 | 1.019219906  | 0.312463365 |
| SYMPK    | -0.158305228 | 0.87458237  | 1.430600089  | 0.157947982 | 2.118071683  | 0.038601719 |
| SYN1     | 0.369200242  | 0.712873581 | 0.116165789  | 0.907925238 | -0.149099561 | 0.882008472 |
| SYN2     | -0.624527443 | 0.533912131 | 0.472763926  | 0.638168264 | -0.506930458 | 0.614185645 |
| SYNCRIP  | 1.875211158  | 0.064110935 | 0.445611879  | 0.65754814  | 0.195082891  | 0.846031161 |
| SYNE1    | 2.663939353  | 0.009198971 | 0.159911899  | 0.873509966 | 0.311359352  | 0.75668758  |
| SYNE2    | 0.428883725  | 0.669065665 | 0.013367426  | 0.989380851 | -0.229556271 | 0.819269468 |
| SYNGAP1  | 0.979501267  | 0.330042448 | -1.657560613 | 0.102843757 | -0.717524763 | 0.476020376 |
| SYNGR1   | 2.689644085  | 0.008570407 | 0.103551989  | 0.917884615 | 1.059524797  | 0.293890429 |
| SYNGR2   | -1.291352261 | 0.199994668 | -0.50363064  | 0.616441835 | -0.639273959 | 0.525240238 |
| SYNGR3   | 1.289720966  | 0.200558142 | -1.216793271 | 0.228645484 | -0.892311182 | 0.376028493 |
| SYNJ1    | -1.250888931 | 0.214321306 | -1.352778222 | 0.181413259 | -2.890741039 | 0.005452921 |
| SYNJ2    | -0.070744896 | 0.943762806 | 0.784261942  | 0.436100062 | 0.764946474  | 0.447501671 |
| SYNJ2BP  | 1.424204966  | 0.157956413 | -0.855221143 | 0.395972357 | -0.118231951 | 0.906305172 |
| SYNM     | -2.125808018 | 0.036346875 | 0.189833154  | 0.850107317 | 0.520148255  | 0.605001947 |
| SYNPO    | 0.262097417  | 0.793864572 | 1.430710119  | 0.157916559 | 1.897668352  | 0.062877612 |
| SYNPO2   | -0.879509183 | 0.381542891 | 0.885444096  | 0.379598951 | 1.721420479  | 0.090671879 |
| SYNRG    | 0.148890342  | 0.881983998 | 0.906530701  | 0.368432015 | 1.651946912  | 0.104118863 |
| SYN      | -0.120915069 | 0.904036527 | 0.150312529  | 0.881043211 | 0.459442603  | 0.647687508 |
| SYPL1    | 0.694985521  | 0.488912398 | 0.841604185  | 0.403490361 | 0.837222854  | 0.406011214 |
| YS1      | -1.041811824 | 0.300379138 | 0.251049017  | 0.802669699 | 1.500924439  | 0.138969166 |
| SYT11    | 0.112023028  | 0.911062649 | 0.193287899  | 0.847413509 | 0.239147194  | 0.811860866 |
| SYT15    | 0.027927824  | 0.977783542 | -0.302971126 | 0.763003449 | 0.965202005  | 0.338576061 |
| SYT17    | 1.571576176  | 0.119670954 | -1.137100863 | 0.260204722 | -0.553086855 | 0.582396042 |
| SYT2     | 0.046239347  | 0.963225227 | -1.098382543 | 0.276607894 | -0.758369723 | 0.451396292 |
| SYTL1    | -0.519800178 | 0.60452008  | -0.069943413 | 0.944480979 | 1.094484993  | 0.278407996 |
| SYTL2    | 1.751594271  | 0.083360014 | -0.639908178 | 0.524769658 | -0.32008151  | 0.750092758 |
| SYTL3    | -1.582384201 | 0.117182789 | -0.19934903  | 0.842691828 | 0.522471242  | 0.603394492 |
| SYTL4    | -2.202674739 | 0.030255517 | 1.458940224  | 0.150013873 | 1.074232047  | 0.287306348 |
| SYVN1    | -0.071496318 | 0.943166502 | -1.687563465 | 0.096903883 | -1.210622055 | 0.231103791 |
| SZT2     | 1.085076604  | 0.280878881 | -0.477223441 | 0.635008921 | 0.176574916  | 0.860476666 |
| TAB1     | 1.547811442  | 0.125289961 | 1.401235306  | 0.16650912  | 1.936885343  | 0.057789154 |
| TAB2     | -1.776177491 | 0.079192197 | -0.016844978 | 0.986618505 | -1.581167511 | 0.119448266 |
| TAB3     | -0.234397121 | 0.815226249 | -1.425182329 | 0.159501233 | -2.830626325 | 0.006432005 |
| TACC1    | -1.046027611 | 0.29843958  | -0.406558887 | 0.685838766 | -0.757175433 | 0.452105634 |
| TACC3    | -1.513121309 | 0.133865384 | 2.447164592  | 0.017470554 | 1.999028144  | 0.050446725 |
| TACO1    | -0.389186909 | 0.698086794 | 1.742643027  | 0.086733129 | 2.141451626  | 0.036584314 |
| TACR2    | -0.163638285 | 0.870394626 | -1.479251539 | 0.144521948 | -0.941649481 | 0.350399709 |
| TACSTD2  | -1.171968924 | 0.244402025 | -0.604965593 | 0.547578011 | -3.37208561  | 0.001355159 |

|          |              |             |              |             |              |             |
|----------|--------------|-------------|--------------|-------------|--------------|-------------|
| TADA1    | 0.364642537  | 0.71626119  | -1.383834635 | 0.171748589 | -0.40469178  | 0.687239279 |
| TADA2A   | 1.386885274  | 0.1690123   | -1.269669432 | 0.209308435 | 0.172625518  | 0.863565571 |
| TADA2B   | -1.307453331 | 0.194496081 | 0.633769106  | 0.528740434 | 0.415061648  | 0.67967605  |
| TADA3    | -1.081912526 | 0.282274659 | 1.458905109  | 0.150023507 | 1.46096678   | 0.149589576 |
| TAF1     | 0.631646214  | 0.52927073  | 0.511872804  | 0.610697134 | -0.102104866 | 0.919036642 |
| TAF10    | -2.002531926 | 0.048334617 | -3.314295124 | 0.001592749 | -2.802737581 | 0.006939299 |
| TAF11    | 1.962723089  | 0.052866676 | 0.802924054  | 0.4253196   | 1.378123757  | 0.173623831 |
| TAF12    | -2.163548885 | 0.033234556 | -3.088414092 | 0.00309461  | -3.138992168 | 0.002699795 |
| TAF13    | -0.02101585  | 0.983281033 | 0.567074395  | 0.57286718  | 0.309564881  | 0.758036014 |
| TAF15    | -1.252788513 | 0.213632312 | -0.796603023 | 0.428953041 | -0.247017297 | 0.805794389 |
| TAF1A    | 1.115139099  | 0.267855079 | -0.431165851 | 0.667957265 | 0.049346635  | 0.9608179   |
| TAF1B    | 2.051302627  | 0.043238525 | 3.026149584  | 0.003698866 | 3.049557976  | 0.003491207 |
| TAF1C    | 1.16345885   | 0.247817554 | -0.26849774  | 0.789275576 | 0.203027301  | 0.839846496 |
| TAF1D    | 0.626147247  | 0.532854192 | 0.381708909  | 0.704081931 | -0.047834405 | 0.962017691 |
| TAF2     | 1.063232622  | 0.290612413 | -1.905869972 | 0.06166178  | -2.521644846 | 0.014540118 |
| TAF3     | 0.032857422  | 0.973863389 | 1.728308365  | 0.089291052 | 1.691881416  | 0.096203205 |
| TAF4     | -0.885951179 | 0.37808086  | -2.100370799 | 0.040085627 | -2.882796132 | 0.005573887 |
| TAF4B    | 1.309186121  | 0.193911117 | -1.057549176 | 0.29467644  | -1.520361218 | 0.134023142 |
| TAF5     | 2.200932419  | 0.030383038 | 0.272504984  | 0.786208347 | 0.245971356  | 0.806599945 |
| TAF5L    | 1.016844386  | 0.312040855 | -2.168533119 | 0.034261621 | -2.679673291 | 0.00964867  |
| TAF6     | -0.986453251 | 0.326640348 | -0.545070302 | 0.587809706 | 0.349351268  | 0.728130414 |
| TAF6L    | 1.11015788   | 0.269983386 | -1.060281574 | 0.293442584 | -1.317170298 | 0.193123367 |
| TAF7     | 0.630604818  | 0.529948409 | -0.056130136 | 0.955432401 | -0.500355294 | 0.618777428 |
| TAF8     | 0.407949737  | 0.684310623 | 0.831422884  | 0.40916844  | 1.235276187  | 0.221863564 |
| TAF9     | 0.823535052  | 0.412450758 | -0.837451879 | 0.405800219 | -0.430469565 | 0.668499403 |
| TAF9B    | 1.217912417  | 0.226542935 | -1.120108707 | 0.267316503 | -1.099070521 | 0.276420316 |
| TAGAP    | -0.017990462 | 0.985687567 | -1.049959579 | 0.298122338 | -2.569247087 | 0.012870926 |
| TAGLN    | 0.894465843  | 0.373535255 | 2.638514272  | 0.010691645 | 1.844071241  | 0.070442956 |
| TAGLN2   | -3.678322927 | 0.000405526 | -1.685713582 | 0.097261792 | -2.295913908 | 0.025430291 |
| TAL1     | -4.095839176 | 9.38E-05    | 1.760764429  | 0.083586674 | 0.737924872  | 0.463628307 |
| TALDO1   | -2.596957905 | 0.011038206 | 1.276352503  | 0.206953567 | 1.226569324  | 0.225095316 |
| TAMM41   | -0.338638774 | 0.735696032 | -0.696762128 | 0.488754334 | 0.243725795  | 0.808330127 |
| TANC1    | 0.657231803  | 0.512763126 | 0.788721015  | 0.43350961  | 0.038945025  | 0.969072146 |
| TANC2    | -0.61160837  | 0.54238839  | -0.508208708 | 0.613247964 | 1.226524624  | 0.225111995 |
| TANK     | -1.261972604 | 0.210324094 | -1.654731037 | 0.103418966 | -2.685037777 | 0.009512783 |
| TAOK1    | 0.081987805  | 0.934844335 | -1.624567694 | 0.109715203 | -2.727949678 | 0.008487271 |
| TAOK2    | 0.37239816   | 0.71050009  | -1.145036616 | 0.256929778 | -0.646725987 | 0.52044023  |
| TAOK3    | 0.057175678  | 0.954536082 | -0.354351713 | 0.724369386 | -0.600374591 | 0.550668501 |
| TAP1     | -1.399006126 | 0.165358536 | 0.084466775  | 0.932978229 | -1.700963943 | 0.094473672 |
| TAP2     | -1.623951563 | 0.107996193 | -0.836296789 | 0.406444214 | -1.807377679 | 0.07605316  |
| TAPBP    | -2.275936668 | 0.025300199 | -1.068369226 | 0.28981135  | -0.741848956 | 0.46126595  |
| TAPBPL   | -0.615281214 | 0.539971694 | 0.708294134  | 0.481619392 | 1.359767059  | 0.179330574 |
| TAPT1    | 1.182025085  | 0.240409472 | 0.746853413  | 0.458190034 | 0.893352843  | 0.375475403 |
| TARBP1   | 3.495361893  | 0.000746684 | -0.128520402 | 0.898184873 | 0.154373639  | 0.877867826 |
| TARBP2   | 0.388339231  | 0.698711621 | 0.821645124  | 0.414667145 | 1.390755479  | 0.169778512 |
| TARDBP   | 2.491139009  | 0.014627485 | 2.783598707  | 0.007259767 | 3.123207925  | 0.00282597  |
| TARM1    | -0.739117614 | 0.461820795 | 1.345708463  | 0.183670171 | -0.597855875 | 0.552336179 |
| TARP     | -0.038593004 | 0.96930311  | -2.604817222 | 0.011676411 | -1.658112431 | 0.102863146 |
| TARS     | -0.506857661 | 0.613534185 | 2.70585557   | 0.008947158 | 2.520236909  | 0.014592345 |
| TARS2    | 0.558478845  | 0.577948892 | 2.773457505  | 0.007461902 | 3.256253319  | 0.001915227 |
| TARSL2   | 3.00335032   | 0.003484343 | 2.183478923  | 0.033088559 | 3.394889369  | 0.00126497  |
| TAS1R3   | 2.383753879  | 0.019307144 | -2.083286959 | 0.041673949 | -1.427871865 | 0.158858716 |
| TAS2R14  | 1.229258869  | 0.222281909 | -2.291774743 | 0.025593678 | -2.746467881 | 0.008076909 |
| TAS2R20  | 2.552118182  | 0.012448829 | 0.907367679  | 0.367993143 | 0.939448428  | 0.351518246 |
| TAS2R4   | 1.606266592  | 0.111831231 | -0.29318239  | 0.770436495 | -0.202180188 | 0.840505491 |
| TAS2R40  | 0.266954871  | 0.790134302 | -1.614627871 | 0.111856895 | -3.204667463 | 0.002229423 |
| TAS2R5   | 0.034807168  | 0.972313069 | -1.335931841 | 0.186826286 | -0.315806014 | 0.753318833 |
| TASP1    | 1.586482554  | 0.116250161 | 0.781143602  | 0.437917058 | 0.121591672  | 0.903655847 |
| TATDN1   | 0.520393875  | 0.60410804  | -0.677788437 | 0.500619654 | 0.004095828  | 0.996746506 |
| TATDN2   | 0.187807224  | 0.851464166 | 2.544301988  | 0.013654396 | 2.864208844  | 0.005866666 |
| TATDN3   | -3.361457378 | 0.001152637 | -1.045394513 | 0.300208264 | -1.187386915 | 0.240066269 |
| TAX1BP1  | -0.051936846 | 0.958697823 | 0.484482177  | 0.629881049 | -0.157098128 | 0.875730183 |
| TAX1BP3  | -2.856576059 | 0.005352916 | -4.308143461 | 6.49E-05    | -5.340226268 | 1.73E-06    |
| TAZ      | 0.324168009  | 0.746587231 | -0.102605293 | 0.918632645 | 1.152144334  | 0.254136121 |
| TBC1D1   | -1.534226438 | 0.128594823 | 0.981090298  | 0.330651426 | 0.334577351  | 0.739188599 |
| TBC1D10A | 0.375687903  | 0.708061426 | -0.00877973  | 0.993026615 | 0.538599812  | 0.592288679 |
| TBC1D10B | -0.924458052 | 0.357799411 | 0.99774008   | 0.322578785 | 1.164752201  | 0.249036454 |
| TBC1D10C | -0.424140729 | 0.672507848 | -0.798334099 | 0.42795615  | 0.197808542  | 0.843908143 |
| TBC1D12  | 1.142417076  | 0.256408207 | 0.041049271  | 0.967398583 | -0.647612646 | 0.519870664 |
| TBC1D13  | -0.117222403 | 0.906953423 | 2.843335809  | 0.006167958 | 3.449827935  | 0.001070484 |
| TBC1D14  | -0.043835654 | 0.965135644 | -0.458373908 | 0.648408702 | -1.293582787 | 0.201097649 |
| TBC1D15  | 1.166400532  | 0.246633083 | -0.285356296 | 0.776394857 | -0.537843555 | 0.592807265 |



|          |              |             |              |             |              |             |
|----------|--------------|-------------|--------------|-------------|--------------|-------------|
| TBC1D16  | 1.060130437  | 0.292013228 | 0.971401469  | 0.335410284 | 0.699960584  | 0.48683749  |
| TBC1D17  | -1.598086457 | 0.113641711 | -0.963025748 | 0.339560484 | -0.05303345  | 0.957893199 |
| TBC1D19  | 0.768164359  | 0.444465109 | -1.48822359  | 0.142146922 | 0.119142716  | 0.905586876 |
| TBC1D2   | -1.447621225 | 0.151309267 | 0.63894333   | 0.525392686 | 0.847489489  | 0.400314839 |
| TBC1D20  | -0.554269525 | 0.580813318 | -1.420499803 | 0.160853226 | -0.920546611 | 0.361219283 |
| TBC1D22A | -1.348796695 | 0.180895136 | 1.454767641  | 0.15116206  | 1.912542168  | 0.060904601 |
| TBC1D22B | -2.623597094 | 0.010270199 | 1.151148354  | 0.254427662 | 1.368269738  | 0.176669692 |
| TBC1D23  | 0.09029682   | 0.928258462 | -0.739367948 | 0.462686394 | -1.535643637 | 0.130233288 |
| TBC1D24  | 2.538025719  | 0.012924587 | 1.245694604  | 0.217920157 | 1.343885466  | 0.184382444 |
| TBC1D25  | -1.095193868 | 0.27644785  | -0.503509641 | 0.616526351 | 0.207924447  | 0.836039131 |
| TBC1D2B  | 0.741488325  | 0.460389998 | 0.834984226  | 0.407176765 | 0.462791963  | 0.645299329 |
| TBC1D30  | -2.156819276 | 0.033771905 | -0.002534335 | 0.997986653 | -0.153792758 | 0.878323706 |
| TBC1D4   | 2.335495875  | 0.021813228 | 0.837992662  | 0.405498932 | 0.131546917  | 0.895812171 |
| TBC1D5   | -0.423337309 | 0.673091616 | 0.041477153  | 0.967058955 | -0.401430036 | 0.689624927 |
| TBC1D7   | 0.848754892  | 0.398341991 | 2.24061887   | 0.028922835 | 1.888143885  | 0.064169321 |
| TBC1D8   | -1.671448798 | 0.098218653 | 1.072967104  | 0.28776087  | 0.760315913  | 0.45024175  |
| TBC1D8B  | -0.500593859 | 0.617918305 | -0.259156229 | 0.796438711 | -0.621827315 | 0.536568301 |
| TBC1D9   | 0.899154056  | 0.371047176 | 1.811856602  | 0.075222625 | 1.004582766  | 0.319400834 |
| TBC1D9B  | 0.749525345  | 0.455558226 | 0.544874441  | 0.587943538 | 0.845233387  | 0.401562376 |
| TBCA     | -0.657883046 | 0.512346539 | -0.315133078 | 0.753799528 | 0.234814389  | 0.815205686 |
| TBCB     | 0.259381873  | 0.795952066 | -2.084050021 | 0.041601856 | -1.147926535 | 0.255858695 |
| TBCC     | -0.858502399 | 0.392969113 | -1.578324235 | 0.119968074 | -1.350525393 | 0.182257301 |
| TBCCD1   | 0.104192496  | 0.917255893 | -3.559422492 | 0.000752708 | -2.432611933 | 0.018196569 |
| TBCD     | 0.685406386  | 0.494905838 | 2.507006794  | 0.015019991 | 2.527053823  | 0.014341042 |
| TBCE     | 0.160261816  | 0.873045553 | -1.154517806 | 0.253055688 | -1.099920829 | 0.276052829 |
| TBCEL    | 0.679973172  | 0.498322943 | -0.089192954 | 0.92923799  | -0.289369907 | 0.773362466 |
| TBCK     | -0.503121679 | 0.616147371 | -0.600858633 | 0.550291472 | -1.539729418 | 0.129234664 |
| TBK1     | -0.43838817  | 0.662189219 | -0.695909018 | 0.489284473 | -1.788514321 | 0.079079983 |
| TBKBP1   | -0.39927364  | 0.690667912 | -1.35068133  | 0.182080445 | -2.674005589 | 0.009794167 |
| TBL1X    | -0.98059638  | 0.329504988 | 0.809950928  | 0.421302151 | 0.589492512  | 0.557891875 |
| TBL1XR1  | 0.46813864   | 0.640853616 | -0.495978204 | 0.621797177 | -0.524032167 | 0.602315476 |
| TBL2     | 0.37726675   | 0.706892115 | 3.025002097  | 0.003710971 | 3.26164882   | 0.001884892 |
| TBL3     | -0.506300424 | 0.613923636 | 1.893665175  | 0.063295808 | 1.95782892   | 0.055218633 |
| TBP      | 0.155766924  | 0.876576819 | -0.975170123 | 0.333553883 | -0.604481747 | 0.547954563 |
| TBPL1    | -0.842865605 | 0.401609906 | -1.161660573 | 0.250164801 | -0.999987102 | 0.321600202 |
| TBRG1    | 1.848040147  | 0.067986933 | -0.702221398 | 0.485369374 | -0.485587814 | 0.629146    |
| TBRG4    | 0.717216562  | 0.475157562 | 1.739194125  | 0.08734295  | 2.244786756  | 0.028733006 |
| TBX19    | 1.19063789   | 0.237027313 | 0.510204689  | 0.611857825 | 2.03959426   | 0.046099191 |
| TBX21    | -0.798051051 | 0.427009154 | -2.306482598 | 0.024701668 | -1.451658239 | 0.152152821 |
| TBX6     | -0.076971729 | 0.938822393 | -0.892610431 | 0.375780098 | -1.154824491 | 0.253045844 |
| TBXA2R   | -0.233162892 | 0.81618144  | -0.110585462 | 0.912329518 | -0.093980706 | 0.925458527 |
| TBXAS1   | -3.04219558  | 0.003102662 | -0.174367622 | 0.862188017 | -0.53507272  | 0.594709127 |
| TC2N     | 1.91675862   | 0.058544017 | -0.681043244 | 0.498573162 | -0.563406483 | 0.575397825 |
| TCAP     | 0.966881761  | 0.336277491 | 0.22791718   | 0.820517807 | 1.351431007  | 0.181968906 |
| TCEA1    | 1.121638295  | 0.265095867 | 0.684354612  | 0.4964958   | 0.758455374  | 0.451345445 |
| TCEA2    | 0.82958652   | 0.409038176 | 1.377565632  | 0.173666955 | 2.584899537  | 0.01236133  |
| TCEA3    | 1.182681606  | 0.240150451 | 1.356005615  | 0.180390011 | 2.389856339  | 0.020230606 |
| TCEAL1   | 1.454288283  | 0.149456898 | -1.057570742 | 0.294666688 | -0.738557168 | 0.463247188 |
| TCEAL3   | 0.390030517  | 0.697465175 | -0.80567284  | 0.42374532  | -0.139869286 | 0.88926301  |
| TCEAL4   | 0.459423234  | 0.647073711 | 0.514386975  | 0.608949646 | 2.152764097  | 0.03564173  |
| TCEAL8   | 1.271927538  | 0.206780973 | -1.179396244 | 0.243089219 | -0.031871328 | 0.974687511 |
| TCEANC   | -0.570766256 | 0.569626257 | -1.209830194 | 0.231286222 | -1.423767034 | 0.160038857 |
| TCEANC2  | 0.467590557  | 0.641244028 | -0.806222498 | 0.423430941 | 0.611194906  | 0.543533288 |
| TCEB1    | -0.621183972 | 0.536099253 | -2.700634481 | 0.009072459 | -1.431014135 | 0.157959891 |
| TCEB2    | -0.95601845  | 0.341706188 | -0.687904434 | 0.494274117 | -0.133825261 | 0.894018518 |
| TCEB3    | 1.201091521  | 0.232968409 | 2.439030196  | 0.017830082 | 1.614624643  | 0.111989458 |
| TCEB4    | 3.486754766  | 0.000768065 | -0.12444454  | 0.901396614 | 0.086064656  | 0.931720713 |
| TCF12    | 1.306762628  | 0.194729619 | -1.631924326 | 0.108151613 | -2.454260064 | 0.01723847  |
| TCF19    | 2.050054076  | 0.04336299  | 0.002917434  | 0.997682309 | 0.930255792  | 0.35621486  |
| TCF20    | -0.822765833 | 0.412885768 | 0.383521239  | 0.702745359 | 0.292354647  | 0.771091386 |
| TCF25    | -0.490214804 | 0.625213253 | 0.114062479  | 0.909584945 | 1.553000294  | 0.126033151 |
| TCF3     | 1.586775199  | 0.116183794 | -0.724822952 | 0.471495073 | -0.478631355 | 0.634056594 |
| TCF4     | 2.264240557  | 0.026039929 | 1.07713084   | 0.285912686 | 0.504874947  | 0.61561946  |
| TCF7     | 1.174746112  | 0.243294706 | -0.200920279 | 0.841468749 | 0.478640144  | 0.634050379 |
| TCF7L1   | -0.75429405  | 0.452705108 | -1.287557401 | 0.203049744 | 0.310083661  | 0.757643554 |
| TCF7L2   | 0.541895632  | 0.589272622 | -2.024258352 | 0.04758984  | -3.498112118 | 0.000923323 |
| TCFL5    | -0.681291308 | 0.497492758 | -1.755417426 | 0.084505067 | -1.394243198 | 0.168728423 |
| TCHP     | 1.581955073  | 0.117280787 | 1.679573662  | 0.098457501 | 2.273384662  | 0.026841678 |
| TCIRG1   | -1.308701273 | 0.194074662 | -0.975078034 | 0.333599163 | -0.997403555 | 0.32284107  |
| TCL1A    | -0.254089793 | 0.800024454 | 0.887614721  | 0.378439673 | 1.266320574  | 0.210618598 |
| TCL1B    | -0.347557115 | 0.729010436 | 0.580928736  | 0.563554843 | 0.599342464  | 0.551351579 |
| TCL6     | 1.310667358  | 0.193412116 | 0.579730439  | 0.564357325 | 0.083291502  | 0.933915533 |

|          |              |             |              |             |              |             |
|----------|--------------|-------------|--------------|-------------|--------------|-------------|
| TCN1     | -4.661106841 | 1.12E-05    | 0.222493845  | 0.824716572 | -1.460956261 | 0.149592454 |
| TCN2     | -3.227879542 | 0.001758032 | 2.591860566  | 0.012076541 | 2.185785581  | 0.033010924 |
| TCOF1    | 0.766874612  | 0.445227625 | 2.045247354  | 0.045408104 | 2.172034384  | 0.034085005 |
| TCP1     | 0.843035691  | 0.401515297 | 3.089408845  | 0.003085752 | 3.794498787  | 0.000364066 |
| TCP11L1  | 0.74284375   | 0.459573092 | -0.420770093 | 0.675488869 | -0.275558884 | 0.783896901 |
| TCP11L2  | -1.498043947 | 0.137733656 | -0.611645948 | 0.543178866 | -1.98193193  | 0.052382054 |
| TCTA     | -0.654394984 | 0.514579872 | -2.208519407 | 0.031202137 | -0.6250974   | 0.534435468 |
| TCTEX1D2 | 3.605961281  | 0.000517474 | -2.013893185 | 0.048700227 | -1.373632785 | 0.17500695  |
| TCTEX1D4 | 1.213558023  | 0.228193818 | -2.103005902 | 0.039845385 | -1.477507529 | 0.145118446 |
| TCTN1    | 1.03908149   | 0.301639834 | -0.637315937 | 0.526444416 | 1.169363321  | 0.247189804 |
| TCTN2    | 2.295654962  | 0.024094929 | 0.596734892  | 0.55302284  | 1.355983507  | 0.180524414 |
| TCTN3    | 2.2567364    | 0.026524491 | 1.475632427  | 0.145488766 | 3.061400423  | 0.003375186 |
| TDG      | 1.142617385  | 0.256325448 | -0.842323357 | 0.403091121 | -1.343755997 | 0.184424068 |
| TDP1     | 0.793329965  | 0.429739272 | 1.457575908  | 0.150388544 | 2.835618785  | 0.006344489 |
| TDP2     | -2.25178432  | 0.026848583 | 0.597333827  | 0.552625711 | -0.06377808  | 0.949373094 |
| TDRD3    | 2.675866631  | 0.008902281 | 0.915451306  | 0.363771679 | 2.091930043  | 0.040971742 |
| TDRD6    | 1.428792404  | 0.156636758 | 0.445109683  | 0.657908872 | -0.818796296 | 0.416358936 |
| TDRD7    | -1.881052393 | 0.063302367 | 1.299150221  | 0.199068967 | -1.521124481 | 0.133831806 |
| TDRD9    | -0.934869177 | 0.352437746 | 0.994097706  | 0.324333421 | 1.131342057  | 0.262712613 |
| TDRKH    | 0.708370747  | 0.480604638 | 0.094368725  | 0.925143792 | 1.37981774   | 0.173104306 |
| TEAD2    | 0.3524868    | 0.725323858 | 0.125231033  | 0.900776734 | 0.38230192   | 0.703678427 |
| TEAD3    | 2.674694174  | 0.008931055 | -0.814709856 | 0.418594369 | -0.487923407 | 0.627501049 |
| TEC      | 1.93605382   | 0.05610089  | 0.12127512   | 0.903895235 | -1.033078893 | 0.305989329 |
| TECPR1   | 1.065946312  | 0.289390804 | 0.295606119  | 0.768593997 | 0.824644879  | 0.413057382 |
| TECPR2   | -0.828456105 | 0.409674346 | 0.278455057  | 0.781660325 | -0.757746649 | 0.451766283 |
| TECR     | -0.345913738 | 0.73024083  | -0.537610312 | 0.592917309 | 0.26648203   | 0.790842672 |
| TECTA    | -0.151644627 | 0.879817568 | -0.540296065 | 0.59107606  | 0.380856778  | 0.704744488 |
| TEF      | 2.581962338  | 0.011493011 | 1.270489625  | 0.209018361 | 1.829560568  | 0.072618451 |
| TEK      | -1.59313906  | 0.114748049 | -0.079966517 | 0.93654109  | 0.367642865  | 0.714519598 |
| TEKT2    | -2.069318464 | 0.041476483 | -2.002712739 | 0.049922905 | -0.772696786 | 0.442937363 |
| TEKT4P2  | 0.832387932  | 0.407464191 | -0.101189866 | 0.919751178 | -1.462033198 | 0.149298095 |
| TELO2    | 1.24130958   | 0.217820658 | 0.680642347  | 0.498824983 | 0.824058135  | 0.413387882 |
| TENC1    | 0.385158859  | 0.701057731 | 0.099729184  | 0.920905644 | 0.662588491  | 0.510300676 |
| TEP1     | 1.72319346   | 0.088398358 | -0.329767673 | 0.74277187  | -0.571529968 | 0.56991777  |
| TEPP     | 1.156877816  | 0.250482066 | -0.898672086 | 0.37256899  | 0.790865424  | 0.432345264 |
| TERF1    | 0.215096826  | 0.830194165 | 0.615029617  | 0.540957564 | 0.431241926  | 0.6679411   |
| TERF2    | -0.788342288 | 0.432634728 | 1.421023623  | 0.160701543 | 1.832982477  | 0.072100401 |
| TERF2IP  | -0.637232568 | 0.525643131 | 1.078138745  | 0.285466541 | 0.837787294  | 0.405696752 |
| TES      | 0.774578206  | 0.440684432 | -0.474701795 | 0.636794548 | 0.207282454  | 0.836538036 |
| TESC     | -2.240208191 | 0.027619791 | 1.020344644  | 0.311831814 | 0.76757881   | 0.445948366 |
| TESK1    | 0.074640063  | 0.940672082 | -1.012780171 | 0.315400941 | -0.314540012 | 0.754274947 |
| TESK2    | -0.674128229 | 0.502013204 | -2.189137022 | 0.032653758 | -2.292547914 | 0.025636881 |
| TET1     | 0.02467127   | 0.980373549 | -2.507036818 | 0.015018844 | -1.492096208 | 0.141262821 |
| TET2     | 0.239218153  | 0.811497856 | -0.616470741 | 0.540012915 | -2.641002097 | 0.010682014 |
| TET3     | -0.991433959 | 0.324217233 | -0.05552356  | 0.955890678 | -0.912951046 | 0.365165689 |
| TEX10    | 0.593988883  | 0.5540576   | 1.952083379  | 0.055795524 | 3.545622462  | 0.000797445 |
| TEX101   | -1.370780531 | 0.173961892 | 1.311394293  | 0.194928421 | 0.000690542  | 0.999451471 |
| TEX14    | 0.37529261   | 0.708354293 | -0.381961024 | 0.703895943 | 1.352872799  | 0.181510481 |
| TEX2     | 3.118898207  | 0.002460311 | 1.084845214  | 0.282510249 | 1.753162632  | 0.08502353  |
| TEX21P   | 1.488765082  | 0.140157491 | -0.55038273  | 0.584185243 | -0.243922381 | 0.80817862  |
| TEX22    | 0.725786259  | 0.469913545 | -0.077180661 | 0.938747315 | 0.035544538  | 0.971771401 |
| TEX261   | -0.046335176 | 0.963149068 | -0.040414731 | 0.967902255 | 0.786345547  | 0.434966134 |
| TEX264   | -0.498363495 | 0.619482727 | 1.460386451  | 0.149617505 | 2.606565796  | 0.011686207 |
| TF       | 1.854796646  | 0.067005237 | -0.14118152  | 0.888219178 | -0.798653835 | 0.427851215 |
| TFAM     | 0.70622027   | 0.48193407  | -0.185056923 | 0.853834497 | -0.697035921 | 0.488651836 |
| TFAP2E   | 3.316411321  | 0.001330625 | 1.315367198  | 0.193598938 | 1.455963329  | 0.150963114 |
| TFAP4    | 2.411959501  | 0.017963967 | -0.096048921 | 0.923815135 | 0.393237288  | 0.695631068 |
| TFB1M    | 0.988361731  | 0.325710461 | -0.008806659 | 0.993003826 | 2.178314787  | 0.033590706 |
| TFB2M    | 1.188469836  | 0.237875446 | -0.187627812 | 0.851827857 | -1.23107475  | 0.902460913 |
| TFCP2    | -1.155703043 | 0.250959837 | 0.874006738  | 0.385744308 | 0.783638837  | 0.43654013  |
| TFCP2L1  | -2.332773674 | 0.021962813 | -0.970150013 | 0.336028246 | -0.397067048 | 0.692820984 |
| TFDP1    | -3.126948597 | 0.002400604 | -0.177855296 | 0.859460667 | -0.694585657 | 0.490174761 |
| TFDP2    | 1.613602357  | 0.110227385 | 0.00724827   | 0.994241815 | 0.944953459  | 0.34872504  |
| TFE3     | -1.948908989 | 0.05452158  | -0.270234895 | 0.787945506 | -0.514603968 | 0.608846414 |
| TFEB     | -2.290102899 | 0.024429066 | 0.358686723  | 0.721140923 | -0.154727029 | 0.877590503 |
| TFEC     | -0.723955572 | 0.47103105  | -0.555270705 | 0.580859827 | -1.837602752 | 0.071405861 |
| TFF3     | 1.77562199   | 0.079284436 | 1.452976777  | 0.151656963 | 1.252119605  | 0.215708863 |
| TFG      | -1.912864166 | 0.05904788  | 0.234777345  | 0.81521421  | -0.235764365 | 0.814472029 |
| TFIP11   | -0.900035809 | 0.370580393 | 1.175096104  | 0.244791347 | 2.273745079  | 0.026818563 |
| TFPT     | -0.35391461  | 0.724257299 | 1.512412329  | 0.135896954 | 1.788074756  | 0.079151699 |
| TFR2     | -1.453834337 | 0.149582461 | -2.279964349 | 0.026330541 | -2.634728881 | 0.010858865 |
| TFRC     | 0.848700472  | 0.398372113 | -0.87610831  | 0.384610468 | -0.810911387 | 0.42083523  |

|         |              |             |              |             |              |             |
|---------|--------------|-------------|--------------|-------------|--------------|-------------|
| TG      | 0.087563075  | 0.930424747 | -0.247484627 | 0.8054133   | -2.001389627 | 0.050184296 |
| TGDS    | 0.487761882  | 0.626942802 | -0.748792092 | 0.457029625 | -1.519327909 | 0.134282519 |
| TGFA    | -2.499884706 | 0.014295342 | -0.196290489 | 0.845073747 | -1.243017518 | 0.219018967 |
| TGFB1   | -1.818162148 | 0.072473459 | -1.647582607 | 0.104883826 | -1.848069243 | 0.069853297 |
| TGFB111 | -1.433403311 | 0.155318937 | -0.007148302 | 0.994321231 | -0.128367892 | 0.898315807 |
| TGFB3   | 0.612308032  | 0.541927597 | -2.24044137  | 0.028935024 | -0.09497705  | 0.924670673 |
| TGFB1   | -2.589467129 | 0.011263323 | 2.991456316  | 0.004081625 | 1.700899317  | 0.094485888 |
| TGFB11  | 0.077195794  | 0.938644662 | -0.252717802 | 0.801386048 | -0.965039623 | 0.338656668 |
| TGFB11  | 0.03985467   | 0.968300109 | -2.071945092 | 0.042758379 | -2.139184146 | 0.036775848 |
| TGFB11  | 1.271020531  | 0.207101955 | -2.402101948 | 0.019547277 | -1.765230611 | 0.082954176 |
| TGFB111 | 0.557019198  | 0.57894141  | -0.825705505 | 0.412378291 | -0.427624667 | 0.670557468 |
| TGIF1   | 2.33042092   | 0.022092827 | -0.320522931 | 0.749731957 | -0.599130284 | 0.551492056 |
| TGIF2   | -0.511687342 | 0.610163388 | 2.455317733  | 0.017116756 | 2.597892391  | 0.011952336 |
| TGM1    | 0.860250131  | 0.392010498 | 0.378143988  | 0.706713753 | -0.464732863 | 0.643917132 |
| TGM2    | -3.266702163 | 0.001555683 | 1.870707608  | 0.066469038 | 0.586446006  | 0.559922553 |
| TGM3    | -2.656114646 | 0.009398457 | -0.430414267 | 0.668500641 | 0.526554708  | 0.600573616 |
| TGOLN2  | -1.38636802  | 0.169169583 | 1.234486018  | 0.222034794 | 1.233066636  | 0.222680542 |
| TGS1    | 1.632664593  | 0.10614607  | 1.136892152  | 0.260291252 | 1.861399584  | 0.067917202 |
| TH1L    | 1.290559536  | 0.200268341 | 0.571245592  | 0.570055594 | 0.893108036  | 0.375605342 |
| THADA   | 1.151575414  | 0.252643642 | 3.786285364  | 0.000366997 | 4.111903757  | 0.000129105 |
| THAP1   | -0.705521547 | 0.482366646 | -0.384435764 | 0.702071265 | -0.332431391 | 0.740799518 |
| THAP11  | 0.177004031  | 0.859915758 | 2.681698706  | 0.009540503 | 1.860416145  | 0.068058472 |
| THAP2   | 1.275456482  | 0.205535605 | -1.88724552  | 0.064169937 | -1.82277133  | 0.073655552 |
| THAP3   | 0.298335167  | 0.766157188 | 2.233193776  | 0.029436584 | 2.155538011  | 0.035413873 |
| THAP4   | -0.889612577 | 0.376121969 | 1.059223491  | 0.293919955 | 1.272792352  | 0.208328643 |
| THAP5   | -0.457922318 | 0.648147452 | -1.140420864 | 0.258831027 | -1.499206218 | 0.139413253 |
| THAP6   | 0.264065516  | 0.792352592 | -1.124212785 | 0.265586371 | -1.45805317  | 0.15038822  |
| THAP7   | 0.07036114   | 0.944067354 | 0.913037405  | 0.36502901  | 1.422264904  | 0.160472417 |
| THAP8   | -1.740828494 | 0.085241315 | 1.102399686  | 0.27487311  | 0.60359669   | 0.548533882 |
| THAP9   | 0.682754088  | 0.496572352 | -0.508253335 | 0.613216866 | -1.023585662 | 0.310414037 |
| THBD    | -1.278944062 | 0.204310291 | -1.213986762 | 0.229707187 | -2.035829161 | 0.046488593 |
| THBS1   | -2.809171279 | 0.006130229 | 1.952257421  | 0.055774366 | 3.394939668  | 0.001264778 |
| THBS2   | 1.887562502  | 0.062411328 | -0.177686192 | 0.859592867 | 0.461785425  | 0.646016623 |
| THBS3   | 0.832417592  | 0.407447546 | 0.713908943  | 0.478166626 | 1.611714427  | 0.112622906 |
| THBS4   | 2.039574552  | 0.044419855 | 0.123337961  | 0.902268876 | 0.410631369  | 0.682903266 |
| THEM4   | 1.688372793  | 0.094913533 | 0.53483033   | 0.594825994 | 2.37620884   | 0.020921491 |
| THEM5   | -0.820969744 | 0.41390257  | 0.242264784  | 0.809435577 | 0.448366787  | 0.655611289 |
| THEMIS  | 1.576573871  | 0.118515227 | -1.28048772  | 0.205506384 | -0.957782858 | 0.342271869 |
| THG1L   | -1.15769697  | 0.250149304 | 0.149885102  | 0.881378903 | -0.194172819 | 0.846740275 |
| THNSL1  | 1.819897771  | 0.072206251 | 0.92857115   | 0.356986631 | 1.587641956  | 0.117974484 |
| THNSL2  | 0.271008764  | 0.787024861 | 1.023144735  | 0.31051761  | 0.312130796  | 0.75609551  |
| THOC1   | 1.76386908   | 0.081256893 | 0.919889047  | 0.361467452 | 2.35874324   | 0.021836421 |
| THOC2   | 1.734667337  | 0.086333586 | 1.074723939  | 0.286980046 | 0.746121367  | 0.458701766 |
| THOC3   | 1.386410679  | 0.169156608 | -0.058050153 | 0.95390961  | -1.425178024 | 0.159632431 |
| THOC4   | -1.340192329 | 0.183664901 | 2.26937654   | 0.027007052 | 1.566328739  | 0.122881914 |
| THOC5   | -1.914986848 | 0.058772796 | 1.138117244  | 0.259783632 | 0.749130652  | 0.456900611 |
| THOC6   | -0.353561458 | 0.724521049 | 3.050361385  | 0.003451875 | 3.721098968  | 0.000460056 |
| THOC7   | -1.65207629  | 0.102116093 | 0.388004283  | 0.699443224 | 0.837928187  | 0.405618281 |
| THOP1   | 0.823637126  | 0.412393054 | 0.6961133    | 0.489145256 | 1.706358122  | 0.093458658 |
| THRA    | 2.097807974  | 0.038816339 | -0.0641842   | 0.949045803 | 1.404738458  | 0.16559867  |
| THRAP3  | -1.965824583 | 0.05250105  | 1.363305271  | 0.178091886 | 1.299485623  | 0.199079285 |
| THSD1   | 1.320020365  | 0.190283396 | -1.698908657 | 0.094732431 | -1.0863509   | 0.281958392 |
| THSD1P1 | 1.135869269  | 0.259123888 | -0.436689202 | 0.663969515 | 0.424746323  | 0.672642314 |
| THSD7A  | -2.521812859 | 0.013492123 | 2.776972962  | 0.007391253 | -1.668314829 | 0.100812434 |
| THTPA   | 2.513343553  | 0.013797414 | -0.000639596 | 0.999491887 | 1.29893832   | 0.199265784 |
| THUMPD1 | 1.551044918  | 0.12451335  | -0.465314276 | 0.643461015 | -1.086246468 | 0.282004179 |
| THUMPD2 | 0.88422925   | 0.37900432  | 0.514247974  | 0.609046199 | 0.528684116  | 0.599105045 |
| THUMPD3 | 1.31819094   | 0.190892365 | 0.715465776  | 0.477211733 | 1.765734764  | 0.082868646 |
| THYN1   | 1.857056376  | 0.066679566 | 1.380713591  | 0.17270161  | 2.631231533  | 0.010958617 |
| TIA1    | 1.235875383  | 0.219824261 | -0.708244461 | 0.48165     | -1.231366211 | 0.223310595 |
| TIAF1   | 1.735473119  | 0.086190084 | 0.475540791  | 0.636200198 | 2.12557183   | 0.037944218 |
| TIAL1   | 0.878142387  | 0.382279966 | -0.945697889 | 0.348253312 | -0.31426735  | 0.754480918 |
| TIAM1   | 4.088583851  | 9.63E-05    | 1.336691612  | 0.186579551 | 1.527574835  | 0.132223475 |
| TIAM2   | -1.951267759 | 0.05423593  | 0.339349261  | 0.735580892 | 1.197726501  | 0.236047383 |
| TICAM1  | 0.565915436  | 0.572904909 | -1.200079632 | 0.235021374 | -1.25015488  | 0.216420214 |
| TICAM2  | -0.685213514 | 0.495026922 | -3.360261229 | 0.001386969 | -3.596708386 | 0.000680396 |
| TIE1    | 0.53775329   | 0.592117362 | 0.087102481  | 0.930892172 | 0.081173026  | 0.935592554 |
| TIFA    | 0.271266956  | 0.786826937 | -1.066201838 | 0.290781416 | -1.773686076 | 0.081529382 |
| TIFAB   | 2.316122904  | 0.022897684 | -0.845921345 | 0.401097386 | -0.965873476 | 0.338242874 |
| TIGD1   | 0.311850071  | 0.755898981 | -1.632148376 | 0.108104279 | -1.243300223 | 0.218915597 |
| TIGD2   | -0.639292704 | 0.524308616 | 1.934018425  | 0.058029317 | 2.387165128  | 0.020365205 |
| TIGD3   | -3.565918227 | 0.000591434 | -0.170162319 | 0.86547879  | -0.419371877 | 0.676542056 |

|          |              |             |              |             |              |             |
|----------|--------------|-------------|--------------|-------------|--------------|-------------|
| TIGD5    | 0.58787094   | 0.5581385   | -0.974911416 | 0.333681101 | -2.246004504 | 0.028650128 |
| TIGD6    | -0.073716171 | 0.941405088 | 1.985253713  | 0.051885    | 1.620769606  | 0.110661402 |
| TIGD7    | -0.033129047 | 0.973647403 | -0.943249548 | 0.349493172 | -0.651467955 | 0.517397957 |
| TIGIT    | 0.420554151  | 0.675115421 | -0.018933512 | 0.984959583 | 0.248745119  | 0.804464131 |
| TIMD4    | 2.843338897  | 0.005560323 | 0.928103269  | 0.357227184 | 0.357060288  | 0.722383079 |
| TIMELESS | -0.018378084 | 0.985379227 | 2.873199189  | 0.005680974 | 2.399356465  | 0.019761815 |
| TIMM10   | -1.330385953 | 0.186860422 | -0.309429929 | 0.758111118 | -0.031379616 | 0.975077902 |
| TIMM13   | 0.234547249  | 0.815110081 | 0.554509257  | 0.581377261 | 0.582313618  | 0.562682903 |
| TIMM17A  | 1.130458502  | 0.261383231 | -0.363084843 | 0.717870662 | -0.004156047 | 0.996698672 |
| TIMM17B  | -1.969265726 | 0.052097902 | -2.424245002 | 0.018500634 | -2.2009521   | 0.031860899 |
| TIMM22   | -1.117630964 | 0.266794802 | 0.699674392  | 0.486946994 | 2.423829148  | 0.01859874  |
| TIMM23   | -0.161332815 | 0.872204533 | 1.769774565  | 0.08205788  | 1.48991408   | 0.141834338 |
| TIMM44   | 0.704008575  | 0.483303467 | -0.818505149 | 0.416442438 | 0.568267454  | 0.57211557  |
| TIMM50   | -0.561772186 | 0.57571251  | 1.214112973  | 0.229659364 | 1.961594562  | 0.054766986 |
| TIMM8A   | -0.102126377 | 0.918890875 | 0.360801829  | 0.719567559 | 0.269422826  | 0.788590424 |
| TIMM8B   | 0.880173014  | 0.381185226 | -1.412920594 | 0.163060389 | -0.992462757 | 0.325223034 |
| TIMM9    | -0.972881312 | 0.33330368  | 0.402094974  | 0.689102435 | 0.821330951  | 0.414926151 |
| TIMMDC1  | 1.466687133  | 0.146058881 | 2.467869865  | 0.016584667 | 2.670197007  | 0.009893062 |
| TIMP1    | -2.406922419 | 0.018197552 | 0.727775143  | 0.469699539 | -0.01448573  | 0.988493733 |
| TIMP2    | -2.392911821 | 0.018861555 | 0.824102605  | 0.413280933 | 0.522822498  | 0.603151603 |
| TINF2    | -0.909364081 | 0.365664926 | 0.362305736  | 0.718449589 | 0.457886945  | 0.648798001 |
| TIPARP   | -0.2948013   | 0.768846473 | -0.792998258 | 0.431033391 | -1.975726099 | 0.053100169 |
| TIPIN    | 0.839053273  | 0.403734037 | 0.181118319  | 0.85691055  | 0.77137941   | 0.443711258 |
| TIPRL    | 0.368047621  | 0.713729749 | -0.804164786 | 0.424608577 | -1.43133356  | 0.157868743 |
| TIRAP    | -2.040300276 | 0.044345959 | -0.202726054 | 0.840063596 | 0.144123521  | 0.885918171 |
| TJAP1    | 1.011489014  | 0.314581253 | -0.308286052 | 0.758976901 | 0.486322617  | 0.628628277 |
| TJP2     | -2.287680212 | 0.024576145 | 1.254381976  | 0.214769948 | 0.741468982  | 0.461494397 |
| TJP3     | 2.20982753   | 0.029736892 | 1.004642611  | 0.319271099 | 1.322246285  | 0.191438927 |
| TK1      | -0.271529477 | 0.786625709 | 1.600686851  | 0.114917593 | 2.62077141   | 0.01126197  |
| TK2      | -0.599086267 | 0.550668837 | 1.037547994  | 0.303816873 | 1.3825528    | 0.172268014 |
| TKT      | -3.300282537 | 0.001400402 | -0.150965141 | 0.880530706 | -0.487467504 | 0.627821992 |
| TKTL1    | -1.017075776 | 0.311931403 | 0.738223086  | 0.463376308 | 2.444231461  | 0.01767652  |
| TLCD2    | 0.014683029  | 0.988318605 | 0.052038943  | 0.958677729 | 1.9117901    | 0.061003084 |
| TLE1     | -0.196025266 | 0.845046545 | 0.669237389  | 0.506017914 | 0.191482219  | 0.848837494 |
| TLE2     | 1.355785142  | 0.178668851 | 0.89655701   | 0.373687446 | 1.486966125  | 0.142609326 |
| TLE3     | -1.919054154 | 0.058248728 | 0.172108376  | 0.863955642 | -0.41346015  | 0.680841962 |
| TLE4     | -3.98775009  | 0.00013832  | 0.398805697  | 0.69151111  | -1.346990309 | 0.18338639  |
| TLK1     | 0.334388723  | 0.738889281 | 0.113784843  | 0.909804056 | -0.733368439 | 0.46638001  |
| TLK2     | -0.528442234 | 0.59853499  | 0.067294342  | 0.946580443 | 0.79938562   | 0.427430403 |
| TLN1     | -2.223969088 | 0.028734378 | 1.343931326  | 0.184240838 | 1.369680197  | 0.176231231 |
| TLN2     | -1.903132251 | 0.060323019 | 1.24339503   | 0.218759705 | 1.726060163  | 0.089827417 |
| TLR1     | -2.120195094 | 0.036830698 | -0.625534691 | 0.534091028 | -1.762132658 | 0.083481358 |
| TLR10    | -0.6837597   | 0.495940139 | -0.285357665 | 0.776393813 | -1.024989194 | 0.309757145 |
| TLR2     | 1.721110135  | 0.088777571 | -0.032847354 | 0.973909882 | -0.812504014 | 0.419928758 |
| TLR3     | -0.706636011 | 0.481676899 | -1.978900879 | 0.052615198 | -1.467713363 | 0.147753041 |
| TLR4     | -1.913711191 | 0.058937982 | -0.910851233 | 0.366170123 | -1.835278284 | 0.071754578 |
| TLR5     | -0.799410727 | 0.42622479  | 0.387015823  | 0.700170808 | -0.503902768 | 0.616298126 |
| TLR6     | 0.612919929  | 0.541524768 | -1.564604249 | 0.123153958 | -2.496548975 | 0.015496883 |
| TLR7     | -1.143095938 | 0.256127806 | 1.831755393  | 0.072160482 | 1.623119116  | 0.11015701  |
| TLR8     | -2.010322677 | 0.047487631 | -0.790706133 | 0.43235932  | -1.865732529 | 0.067297726 |
| TLR9     | -1.832953324 | 0.070222482 | -0.014936286 | 0.98813463  | -0.007724602 | 0.993864058 |
| TM2D1    | 1.730812919  | 0.08702274  | 1.795400461  | 0.077836559 | 1.03742009   | 0.303980311 |
| TM2D2    | -0.384145564 | 0.701805834 | 1.45358915   | 0.151487592 | 2.397101961  | 0.019872175 |
| TM2D3    | -0.017991655 | 0.985686619 | 0.090852773  | 0.927924806 | -0.130036125 | 0.897001862 |
| TM4SF19  | 1.04152258   | 0.300512523 | -1.198655397 | 0.235570604 | -1.025283191 | 0.309619666 |
| TM6SF1   | -2.996480512 | 0.003556207 | 0.105141086  | 0.916629163 | -1.704765937 | 0.093757318 |
| TM7SF2   | 1.037299706  | 0.302464447 | -1.948309089 | 0.056256057 | -0.318891262 | 0.750990412 |
| TM7SF3   | -0.251911741 | 0.801702135 | -0.741482097 | 0.461413916 | -0.876712356 | 0.384372677 |
| TM9SF1   | -1.721784351 | 0.088654702 | 0.404941249  | 0.687020768 | -0.692867866 | 0.49124399  |
| TM9SF2   | 0.269276575  | 0.788353075 | -0.362845158 | 0.718048745 | -1.136779645 | 0.260451201 |
| TM9SF3   | 0.941455074  | 0.349072901 | -0.019084036 | 0.984840024 | -0.874505923 | 0.385562273 |
| TM9SF4   | 0.04203158   | 0.966569627 | 1.1514245    | 0.254315022 | 1.473706669  | 0.146136444 |
| TMBIM1   | -1.798829034 | 0.075505937 | 0.605668833  | 0.547114063 | 0.193766128  | 0.847057204 |
| TMBIM4   | -0.016035871 | 0.987242412 | -0.395841487 | 0.693684493 | -1.511739593 | 0.13619954  |
| TMBIM6   | -2.300155588 | 0.023827035 | 1.469454128  | 0.147150985 | 1.84666572   | 0.070059825 |
| TMC2     | 0.451864397  | 0.652488779 | -0.140373653 | 0.888854534 | 1.425428444  | 0.159560384 |
| TMC4     | -0.716725526 | 0.475459026 | -1.61955044  | 0.110792056 | -1.196929058 | 0.236355591 |
| TMC5     | -3.784233603 | 0.000282307 | 0.315801348  | 0.75329482  | 0.132944872  | 0.89471155  |
| TMC6     | 0.347620041  | 0.728963338 | -1.226538988 | 0.224986529 | -0.329054836 | 0.743336575 |
| TMC8     | 0.549013531  | 0.584399465 | -2.817975196 | 0.006611501 | -1.302627487 | 0.198011202 |
| TMCC1    | -3.853380431 | 0.000222103 | -1.628212908 | 0.108938167 | -2.633757018 | 0.010886501 |
| TMCC2    | -3.246367128 | 0.001659362 | 0.966910594  | 0.337631343 | 0.260246297  | 0.795624309 |

|          |              |             |              |             |              |             |
|----------|--------------|-------------|--------------|-------------|--------------|-------------|
| TMCC3    | -5.098623193 | 1.97E-06    | 0.758461882  | 0.451267068 | 0.340871097  | 0.734470838 |
| TMCO1    | 0.927244473  | 0.356359328 | -0.655390229 | 0.514825838 | -0.886398419 | 0.379177769 |
| TMCO3    | -0.940468287 | 0.349575741 | -0.16515842  | 0.869397606 | -1.328145836 | 0.189495166 |
| TMCO4    | 1.46355657   | 0.146911112 | 3.080038398  | 0.003170143 | 3.409789626  | 0.001209145 |
| TMCO6    | -0.602317454 | 0.548526116 | -1.832723122 | 0.072014272 | -1.191996723 | 0.238268409 |
| TMCO7    | 1.179356275  | 0.241464472 | 2.270173664  | 0.026955589 | 2.555318291  | 0.013340373 |
| TMED1    | 0.728434789  | 0.78133789  | 0.709708361  | 0.480748419 | 0.649784461  | 0.518476942 |
| TMED10   | 1.128347499  | 0.262268457 | -0.80264189  | 0.425481399 | 0.031634738  | 0.974875349 |
| TMED10P1 | 0.850483394  | 0.397385962 | -0.333490814 | 0.739974876 | -0.845084037 | 0.401645045 |
| TMED2    | -0.199321915 | 0.842475042 | -0.970800422 | 0.335706984 | -1.232124419 | 0.223029451 |
| TMED3    | 0.420850456  | 0.674899846 | 1.020304667  | 0.311850605 | 1.749141362  | 0.085722528 |
| TMED4    | 2.498085383  | 0.014363118 | 0.04822132   | 0.961706683 | -0.013904257 | 0.988955576 |
| TMED5    | 0.411749218  | 0.681533722 | -0.968500104 | 0.336844111 | -1.461689122 | 0.149392092 |
| TMED6    | -0.912735902 | 0.363898402 | 1.378661243  | 0.173330509 | 3.294984468  | 0.001707288 |
| TMED7    | -0.663656259 | 0.50866614  | -1.548166352 | 0.127059843 | -2.25450092  | 0.028077738 |
| TMED8    | 1.135214158  | 0.259396705 | -0.052716968 | 0.958139837 | -0.95489672  | 0.343716714 |
| TMED9    | 0.241896782  | 0.809428185 | 2.153572694  | 0.035472194 | 2.427631174  | 0.018423672 |
| TMEM101  | 0.39069632   | 0.696974718 | 2.089452791  | 0.041094501 | 1.173123487  | 0.245691246 |
| TMEM102  | -0.159119638 | 0.873942626 | 1.635908895  | 0.107312312 | 0.79408172   | 0.430486012 |
| TMEM104  | -2.153152574 | 0.034067855 | 1.366631978  | 0.177051996 | 2.103432106  | 0.039913785 |
| TMEM106A | 0.25745521   | 0.797434034 | 1.842811816  | 0.070504794 | 1.711398154  | 0.092518417 |
| TMEM106B | 0.2940958    | 0.769383701 | -0.992744236 | 0.324987049 | -1.652186023 | 0.104069931 |
| TMEM106C | 1.069647172  | 0.287730483 | -0.004505222 | 0.996420934 | 0.779841512  | 0.438754007 |
| TMEM107  | 0.561435881  | 0.575940692 | -0.530405735 | 0.597869764 | -1.04518359  | 0.300409996 |
| TMEM109  | 0.710558339  | 0.47925435  | 0.737418153  | 0.463861727 | 0.702838242  | 0.485055957 |
| TMEM11   | -1.511591922 | 0.134253828 | -2.404194254 | 0.019446156 | -1.896306654 | 0.063060922 |
| TMEM110  | 1.492340139  | 0.139219687 | 1.278361847  | 0.206249421 | 1.804956769  | 0.07643611  |
| TMEM111  | -4.086045    | 9.72E-05    | -0.245312645 | 0.807086339 | 0.166742072  | 0.868171093 |
| TMEM115  | -0.35088295  | 0.726522563 | 1.347503077  | 0.183095257 | 1.440872884  | 0.155165522 |
| TMEM116  | 0.76023768   | 0.449163446 | -1.692171677 | 0.096017002 | -0.184205618 | 0.854514786 |
| TMEM117  | -0.021064353 | 0.983242453 | -0.408929153 | 0.684108247 | -0.125761566 | 0.900369192 |
| TMEM119  | -1.786514611 | 0.077491887 | 1.048362573  | 0.298850929 | -1.621115199 | 0.110587093 |
| TMEM120A | -2.684342915 | 0.008696748 | -1.101543815 | 0.275242073 | -1.294986419 | 0.20061632  |
| TMEM120B | 0.835841598  | 0.405528798 | -1.66988252  | 0.100369275 | -0.023633529 | 0.981228587 |
| TMEM121  | 1.458522702  | 0.148289582 | -0.69378676  | 0.490604661 | -0.643871673 | 0.644530266 |
| TMEM123  | 0.448751894  | 0.654723991 | -0.061299282 | 0.95133308  | -1.580470288 | 0.119607855 |
| TMEM126A | 0.71673876   | 0.475450899 | -1.379210044 | 0.173162169 | -0.270636347 | 0.78766156  |
| TMEM126B | 0.746823621  | 0.457179226 | -1.368202492 | 0.176562688 | -1.061424188 | 0.29303432  |
| TMEM127  | -2.507359896 | 0.014016832 | 1.00117322   | 0.32093077  | 0.750324734  | 0.456187046 |
| TMEM128  | 1.908464834  | 0.059621463 | -0.284190733 | 0.777283419 | -0.35651826  | 0.722786659 |
| TMEM129  | 1.49566034   | 0.138353145 | -0.051125294 | 0.959402576 | 0.322737644  | 0.748090827 |
| TMEM131  | -0.273234075 | 0.785319453 | 0.260726638  | 0.795233261 | 0.593934759  | 0.554937461 |
| TMEM132A | 1.111631151  | 0.269352682 | -0.389275433 | 0.698507973 | -0.707304049 | 0.482298409 |
| TMEM132D | -0.721608513 | 0.472465942 | 1.021303728  | 0.311381251 | -0.313541012 | 0.755029688 |
| TMEM132E | 0.379877004  | 0.704960478 | -0.686158879 | 0.495365903 | -0.231254784 | 0.817956207 |
| TMEM134  | 1.028497948  | 0.306560472 | -2.590686757 | 0.0121134   | -1.840158288 | 0.071024126 |
| TMEM135  | 0.562793886  | 0.57501956  | -0.960005871 | 0.341065099 | -2.373226993 | 0.021075224 |
| TMEM138  | 0.686555521  | 0.494184749 | -2.626606107 | 0.011030649 | -1.573294753 | 0.121260263 |
| TMEM140  | -3.494962005 | 0.000747664 | -0.139359088 | 0.889652548 | -2.502079039 | 0.015281294 |
| TMEM141  | 0.442772972  | 0.659026521 | -1.21453842  | 0.229498211 | -0.94151459  | 0.350468191 |
| TMEM143  | 0.314268304  | 0.75406802  | -1.192403966 | 0.237992379 | 0.263760559  | 0.792928548 |
| TMEM144  | 2.397120045  | 0.018659886 | 1.048268021  | 0.298894104 | 0.330599667  | 0.742175471 |
| TMEM147  | 0.60921172   | 0.543968316 | -3.20617525  | 0.002196088 | -2.656125777 | 0.010266415 |
| TMEM14A  | 0.384215127  | 0.701754467 | -0.555584495 | 0.580646658 | -1.265909621 | 0.210764638 |
| TMEM14B  | 1.008991092  | 0.315770895 | -0.709146698 | 0.481094223 | -0.340728501 | 0.734577614 |
| TMEM14C  | 1.019392031  | 0.310837185 | -0.986733659 | 0.327900341 | -1.289953871 | 0.202346075 |
| TMEM14E  | 1.012767506  | 0.313973528 | -0.053540941 | 0.957486188 | 0.028702823  | 0.977203223 |
| TMEM150A | -0.605532243 | 0.546398433 | -0.805984209 | 0.423567214 | -1.289487392 | 0.202506974 |
| TMEM150B | -1.994901797 | 0.049176619 | 2.280164391  | 0.026317905 | 1.162729544  | 0.2498496   |
| TMEM154  | -2.258578798 | 0.026404795 | -2.234583635 | 0.02933981  | -3.562301855 | 0.000757265 |
| TMEM156  | 2.194281595  | 0.030874142 | -0.655873345 | 0.514517166 | -0.857545459 | 0.394783424 |
| TMEM158  | -3.500984956 | 0.00073302  | 1.613023514  | 0.112205731 | -0.022063251 | 0.9824756   |
| TMEM159  | -2.04418262  | 0.043952436 | 1.218759491  | 0.227903802 | 0.998132003  | 0.322490875 |
| TMEM160  | 0.381942886  | 0.703433056 | -2.682575555 | 0.009518351 | -2.228269955 | 0.029878219 |
| TMEM161A | 1.140598949  | 0.257160245 | 1.247123839  | 0.217399559 | 1.38946843   | 0.170167288 |
| TMEM161B | 1.06928191   | 0.287894059 | -1.031512807 | 0.306612494 | -0.804625297 | 0.424424568 |
| TMEM163  | -1.457020257 | 0.148702953 | 0.741787324  | 0.46123037  | -0.458476481 | 0.648377072 |
| TMEM164  | -3.767813768 | 0.000298737 | -0.011514172 | 0.990853013 | -0.377276511 | 0.707388164 |
| TMEM165  | 0.946394531  | 0.346562916 | -1.314674911 | 0.19383011  | -2.85895004  | 0.005952047 |
| TMEM167A | 0.186078641  | 0.852815338 | -0.05044841  | 0.959939608 | -0.363955171 | 0.717256292 |
| TMEM167B | -1.004159314 | 0.318080561 | 0.058952329  | 0.953194142 | -0.6566642   | 0.514075123 |
| TMEM168  | 1.952385486  | 0.054101016 | -1.137450336 | 0.26005988  | -1.637715563 | 0.107065097 |

|          |              |             |              |             |              |             |
|----------|--------------|-------------|--------------|-------------|--------------|-------------|
| TMEM169  | 0.254205392  | 0.799935439 | 0.132339443  | 0.895177055 | -0.296881469 | 0.767650788 |
| TMEM170A | 0.089070562  | 0.929230113 | -2.029518104 | 0.047034781 | -3.629755301 | 0.000613616 |
| TMEM170B | -0.063531907 | 0.949488381 | 0.056818018  | 0.954886813 | -1.56242165  | 0.123799049 |
| TMEM171  | 0.562087725  | 0.575498459 | -1.774113822 | 0.081329959 | -1.227205171 | 0.224858144 |
| TMEM173  | 1.074090896  | 0.285745542 | -0.869292329 | 0.388295439 | -0.129126906 | 0.897717952 |
| TMEM175  | -0.321537814 | 0.748572424 | -1.336940576 | 0.186498754 | -0.854926425 | 0.396219468 |
| TMEM176A | 0.836584131  | 0.405113423 | -1.645890895 | 0.105232955 | -2.066930244 | 0.043355662 |
| TMEM176B | -0.002125115 | 0.998309259 | -1.4294498   | 0.158276778 | -1.951021206 | 0.056043235 |
| TMEM177  | -0.291745304 | 0.771174381 | -1.131120186 | 0.262692356 | -0.221308578 | 0.825653784 |
| TMEM179B | -2.37406669  | 0.019788645 | -0.963420216 | 0.339364268 | -0.39316953  | 0.695680824 |
| TMEM18   | 0.851094544  | 0.397048273 | 0.34107878   | 0.734285397 | 1.042503541  | 0.301639253 |
| TMEM180  | 0.169847442  | 0.865523593 | -0.640453437 | 0.524417742 | -0.336612961 | 0.737661603 |
| TMEM181  | 2.094098318  | 0.039154153 | -1.116363345 | 0.26890234  | -1.886557021 | 0.064386703 |
| TMEM182  | -1.827679262 | 0.071018322 | -1.013683837 | 0.314973123 | -0.737100831 | 0.464125269 |
| TMEM183A | 0.071630366  | 0.943060129 | 0.310501485  | 0.757300476 | 1.350561276  | 0.182245868 |
| TMEM184A | -0.044073122 | 0.964946899 | 0.076804749  | 0.939045052 | 0.550910676  | 0.583877004 |
| TMEM184B | -2.736489565 | 0.007524434 | -1.682677758 | 0.097851501 | -1.797702861 | 0.077593243 |
| TMEM184C | -1.728976373 | 0.087352692 | -1.186791987 | 0.240181756 | -1.275339418 | 0.207432496 |
| TMEM185A | -0.294741922 | 0.768891684 | -0.213546906 | 0.83165453  | -0.273340153 | 0.785593105 |
| TMEM185B | 0.096743509  | 0.92315212  | 0.382237817  | 0.703691771 | -1.294799555 | 0.200680349 |
| TMEM186  | 0.506474053  | 0.613802276 | 1.530850808  | 0.131280611 | 2.062388468  | 0.043801437 |
| TMEM187  | -0.164817145 | 0.869469429 | 2.118164068  | 0.038487624 | 1.603683853  | 0.114385923 |
| TMEM188  | -0.62818866  | 0.531522427 | -1.523386339 | 0.133134197 | -1.724496204 | 0.090111341 |
| TMEM189  | 0.325971763  | 0.745226798 | 3.695803531  | 0.000490076 | 3.776485917  | 0.000385666 |
| TMEM19   | 1.559233606  | 0.122563687 | 0.097411292  | 0.922737967 | 0.446882494  | 0.656676227 |
| TMEM191A | 1.142221072  | 0.256489206 | -1.54996354  | 0.126628045 | -0.74229496  | 0.460997886 |
| TMEM191B | 0.899513015  | 0.370857105 | -1.398179796 | 0.167420124 | -0.665516883 | 0.508440468 |
| TMEM192  | 1.392020456  | 0.167456874 | 0.484442987  | 0.629908685 | 1.932851356  | 0.058295826 |
| TMEM194A | 1.847340776  | 0.068089234 | -0.465697444 | 0.643188329 | -0.859556776 | 0.393682796 |
| TMEM194B | 1.190879065  | 0.236933101 | 0.385148344  | 0.701546191 | -0.240422129 | 0.810877315 |
| TMEM198  | -1.267665737 | 0.208292384 | 0.568266766  | 0.572062777 | -1.149735903 | 0.255118721 |
| TMEM199  | -2.551580568 | 0.012466685 | 0.263036089  | 0.793461432 | -0.324393846 | 0.746843426 |
| TMEM2    | -0.310714462 | 0.756759288 | 0.869621366  | 0.388117044 | 0.358348877  | 0.721423949 |
| TMEM200A | -1.163075049 | 0.24797239  | 2.190629745  | 0.032539889 | 0.789787692  | 0.432969337 |
| TMEM201  | 0.402897441  | 0.68800989  | 1.061288085  | 0.292988977 | 1.246308807  | 0.217817745 |
| TMEM203  | -1.193152152 | 0.23604647  | 1.057894681  | 0.294520225 | 1.328577118  | 0.189353657 |
| TMEM204  | 1.233639023  | 0.220652709 | 1.043165602  | 0.301230344 | 0.461216077  | 0.64642251  |
| TMEM205  | -1.566638521 | 0.120821598 | 0.516649417  | 0.607379078 | 0.886707443  | 0.379012763 |
| TMEM206  | 0.62016721   | 0.536765273 | 1.154956746  | 0.25287735  | -1.021625721 | 0.311332922 |
| TMEM208  | -1.06959326  | 0.287754622 | -1.241812108 | 0.219338996 | -0.715788312 | 0.47708373  |
| TMEM209  | 1.681919226  | 0.096163011 | 0.778073978  | 0.439710025 | 0.03053266   | 0.975750349 |
| TMEM212  | -0.502498395 | 0.616583819 | 2.013663504  | 0.048725082 | -0.649641874 | 0.518568384 |
| TMEM214  | -0.702368969 | 0.484320033 | 0.466453474  | 0.642650437 | 1.041381136  | 0.302155086 |
| TMEM216  | -1.171499968 | 0.244589361 | -1.698219986 | 0.094863092 | -1.526244861 | 0.132553826 |
| TMEM218  | 1.085726336  | 0.280592854 | -1.294400302 | 0.200692874 | -0.650273963 | 0.518163087 |
| TMEM219  | -0.972637628 | 0.333424131 | 1.565626708  | 0.12291422  | 1.411904962  | 0.163487472 |
| TMEM220  | 2.071310822  | 0.041285471 | -0.836261048 | 0.406464151 | 0.434341968  | 0.665702127 |
| TMEM221  | 1.289866132  | 0.200507952 | 2.127920221  | 0.037635236 | 3.258031903  | 0.001905177 |
| TMEM222  | -1.849896417 | 0.067716032 | -0.180195616 | 0.857631488 | 0.223918276  | 0.823632385 |
| TMEM223  | 0.910208367  | 0.365222088 | -1.382722383 | 0.172087754 | -0.473793549 | 0.637481419 |
| TMEM229B | -0.635364229 | 0.526854929 | 0.805997957  | 0.423559351 | 0.953073973  | 0.344631267 |
| TMEM231  | 1.008898187  | 0.315815199 | -0.93414359  | 0.354129701 | -1.17263038  | 0.245887393 |
| TMEM234  | -0.417050602 | 0.677666466 | -1.112419754 | 0.270579261 | -1.190282809 | 0.238935705 |
| TMEM237  | 1.215975989  | 0.227276021 | 0.056612776  | 0.955049596 | 0.63388225   | 0.528727601 |
| TMEM25   | 2.735183385  | 0.007551946 | 0.298926883  | 0.766071759 | 1.077117037  | 0.286026892 |
| TMEM30A  | -0.116833767 | 0.907260487 | -0.164301408 | 0.870069109 | -1.484079795 | 0.143371343 |
| TMEM30B  | 0.4964269    | 0.620842516 | 0.414225516  | 0.680247558 | -0.155748944 | 0.876788642 |
| TMEM33   | -1.81843273  | 0.072431747 | -0.576160674 | 0.566751283 | -1.509897071 | 0.13666827  |
| TMEM38A  | -0.743250562 | 0.45932807  | 2.570233274  | 0.012772301 | 2.488449383  | 0.015817606 |
| TMEM38B  | 1.258278141  | 0.211650321 | -1.075049641 | 0.28683545  | -1.764167389 | 0.083134792 |
| TMEM39A  | 0.97549334   | 0.332014381 | -1.888529287 | 0.06399432  | -1.681136956 | 0.098282714 |
| TMEM39B  | 0.086877132  | 0.930968388 | -0.111843114 | 0.911336668 | 1.291631441  | 0.201768236 |
| TMEM40   | -4.988974728 | 3.07E-06    | 1.638355621  | 0.106799568 | 0.053895045  | 0.95720979  |
| TMEM41A  | 2.866300013  | 0.00520511  | 2.028178498  | 0.047175616 | 3.015855846  | 0.003842102 |
| TMEM41B  | 2.543116031  | 0.012750884 | -1.341270193 | 0.185097887 | -0.734595871 | 0.465637829 |
| TMEM42   | 1.569350233  | 0.12018859  | -0.436222353 | 0.664306195 | -0.242623991 | 0.809179408 |
| TMEM43   | -1.611736847 | 0.110633485 | 0.395505051  | 0.693931335 | -0.234670664 | 0.815316698 |
| TMEM44   | 2.274545026  | 0.025387234 | 1.067176261  | 0.290345013 | 0.5244081    | 0.60205574  |
| TMEM45B  | -0.431080926 | 0.667473456 | -0.474695524 | 0.636798991 | 1.118631009  | 0.268053157 |
| TMEM48   | 1.722223077  | 0.088574824 | 0.210262816  | 0.834204611 | 0.260006255  | 0.795808534 |
| TMEM5    | 1.297480809  | 0.197888282 | 0.08111538   | 0.935631407 | 0.87408994   | 0.385786808 |
| TMEM50A  | -2.226870345 | 0.028532402 | -1.922024283 | 0.059554194 | -2.009150423 | 0.049330106 |

|            |              |             |              |             |              |             |
|------------|--------------|-------------|--------------|-------------|--------------|-------------|
| TMEM50B    | 1.447665915  | 0.151296791 | -1.416059353 | 0.162143515 | -0.455023266 | 0.650844311 |
| TMEM51     | 0.92947354   | 0.355209978 | 2.777492183  | 0.00738087  | 1.566740512  | 0.122785574 |
| TMEM53     | -0.255097618 | 0.799248478 | -1.745728415 | 0.086190577 | -0.863651354 | 0.391448072 |
| TMEM55A    | -3.209704827 | 0.001860359 | -1.658247203 | 0.102704578 | -2.591596153 | 0.012148968 |
| TMEM55B    | -0.162157707 | 0.871556874 | -1.607068409 | 0.113508255 | -1.367006442 | 0.177063114 |
| TMEM56     | -2.050718688 | 0.043296698 | 0.444739758  | 0.658174646 | 0.34754149   | 0.729481957 |
| TMEM56-RWD | 0.73914736   | 0.461802826 | 0.248966123  | 0.804272654 | -0.134863787 | 0.893201111 |
| TMEM57     | 0.004607576  | 0.996334225 | 0.773234451  | 0.442545558 | 2.157739724  | 0.035233928 |
| TMEM59     | -1.248264754 | 0.215275795 | 0.378874932  | 0.706173835 | 0.244729184  | 0.807556906 |
| TMEM60     | -2.422294536 | 0.017493048 | -1.773502521 | 0.08143218  | -1.643013123 | 0.105960544 |
| TMEM62     | 0.173302809  | 0.862815122 | 0.056956136  | 0.954777269 | 1.244359668  | 0.218528534 |
| TMEM63A    | 1.98073519   | 0.050773163 | -0.780183114 | 0.438477615 | -0.119677501 | 0.905165143 |
| TMEM63B    | -2.199325893 | 0.030501037 | -1.468680672 | 0.147360123 | -1.202368296 | 0.234259145 |
| TMEM63C    | 0.634984783  | 0.527101214 | 0.357100484  | 0.722321673 | -0.802722269 | 0.425514804 |
| TMEM64     | 0.416369935  | 0.678162518 | -1.519099627 | 0.13420804  | -2.399397592 | 0.019759807 |
| TMEM65     | 0.298244766  | 0.766225948 | -1.718647237 | 0.091049945 | -3.095011267 | 0.003065229 |
| TMEM66     | 0.23639819   | 0.81367818  | 1.269191045  | 0.209477761 | 0.545259444  | 0.587731243 |
| TMEM67     | 0.190229434  | 0.849571556 | -1.0226374   | 0.310755445 | -0.681585745 | 0.498298338 |
| TMEM68     | 1.324908664  | 0.18866335  | -1.14370766  | 0.257476158 | -1.458756587 | 0.150244501 |
| TMEM69     | -1.592507422 | 0.114889915 | -2.337716706 | 0.022898478 | -1.011737392 | 0.31599697  |
| TMEM70     | 0.540135643  | 0.590480505 | -1.215309364 | 0.229206399 | -1.906272836 | 0.061729715 |
| TMEM71     | -3.110354025 | 0.00252519  | -1.238742469 | 0.220465588 | -1.299770149 | 0.198982382 |
| TMEM79     | -1.996127776 | 0.049040491 | 1.188985153  | 0.239324418 | -0.101139033 | 0.919799826 |
| TMEM80     | 0.699596721  | 0.486041524 | -0.500972768 | 0.618299519 | -0.412274047 | 0.681705967 |
| TMEM81     | -1.439629445 | 0.153553084 | 1.505572014  | 0.137641891 | 1.410858583  | 0.163794422 |
| TMEM85     | 0.455406209  | 0.649949121 | -0.813588773 | 0.419231306 | -0.476324566 | 0.63568864  |
| TMEM86A    | -1.623890059 | 0.108009344 | 0.046529628  | 0.963049078 | 0.489209166  | 0.626596304 |
| TMEM86B    | -0.551207008 | 0.582901589 | -0.05892559  | 0.953215347 | 0.163960881  | 0.870349801 |
| TMEM87A    | 1.867466643  | 0.065196323 | 2.980075757  | 0.004215011 | 3.227605413  | 0.002084153 |
| TMEM87B    | 1.885283015  | 0.062722113 | 0.076419472  | 0.939350214 | -0.54721605  | 0.586395436 |
| TMEM88     | -2.054963934 | 0.042875309 | -1.552510015 | 0.12601823  | -1.552459117 | 0.126162454 |
| TMEM8A     | -0.350558975 | 0.726764782 | -1.229916024 | 0.223728713 | -1.588201709 | 0.117847758 |
| TMEM8B     | 2.011725224  | 0.047336507 | 0.750459158  | 0.456033147 | 1.607288635  | 0.113591796 |
| TMEM9      | 1.674654588  | 0.097585507 | 0.645130313  | 0.521404335 | 1.266890085  | 0.210416337 |
| TMEM91     | -0.943371969 | 0.34809744  | -0.419278007 | 0.676572632 | -0.778306173 | 0.439651002 |
| TMEM92     | -1.58133391  | 0.117422754 | -0.292208446 | 0.771177254 | -0.306409006 | 0.760424831 |
| TMEM93     | 1.618773787  | 0.109107885 | -3.147447995 | 0.002608133 | -3.150726946 | 0.002609436 |
| TMEM97     | 0.864530988  | 0.38966859  | -1.205799185 | 0.232825103 | -0.60327214  | 0.548753145 |
| TMEM99     | -1.407359271 | 0.162875934 | -1.407350458 | 0.164697372 | 0.096018634  | 0.923847125 |
| TMEM9B     | -0.237634135 | 0.812722397 | -2.140352681 | 0.036572937 | -0.234650849 | 0.046611041 |
| TMF1       | 0.4075417    | 0.684609101 | -0.046094571 | 0.963394323 | -1.508041061 | 0.137141724 |
| TMIE       | 0.619922992  | 0.536925309 | 1.479135478  | 0.144552874 | 2.411976737  | 0.019154127 |
| TMIGD2     | 2.369356825  | 0.020026579 | -0.689164328 | 0.493486916 | -0.281442409 | 0.779404108 |
| TMLHE      | -0.984896325 | 0.327400242 | -1.915465806 | 0.060402341 | -2.905146975 | 0.005239766 |
| TMOD1      | -3.07378167  | 0.002821296 | 1.519323959  | 0.134151674 | 1.199266601  | 0.235452968 |
| TMOD2      | 1.751523233  | 0.083372315 | -0.359048216 | 0.720871933 | -2.852726706 | 0.006054572 |
| TMOD3      | -0.745877959 | 0.457747389 | -1.235548127 | 0.221642464 | -2.103350379 | 0.039921217 |
| TMOD4      | 1.985926281  | 0.050183084 | -1.061465976 | 0.292908856 | 1.083275288  | 0.283309026 |
| TMPO       | 1.227185005  | 0.223056334 | -0.066721178 | 0.947034742 | -0.313178054 | 0.755303961 |
| TMPPE      | -1.282333067 | 0.203124797 | 0.433203708  | 0.666484844 | -1.130193753 | 0.263191951 |
| TMPRSS13   | 3.068658539  | 0.002865261 | 1.986244343  | 0.051771924 | 2.257006526  | 0.027910883 |
| TMPRSS3    | 0.951501683  | 0.34398004  | 1.27670831   | 0.206828749 | 1.282692811  | 0.204861433 |
| TMPRSS5    | 2.657533292  | 0.009362    | 1.032789653  | 0.306019579 | 0.51813296   | 0.606398081 |
| TMPRSS6    | 0.634624386  | 0.527335189 | 0.414219969  | 0.680251597 | 1.047842378  | 0.299193883 |
| TMPRSS9    | -0.48615191  | 0.628079124 | -1.034616236 | 0.305172745 | -1.912544532 | 0.060904292 |
| TMSB10     | -0.243724163 | 0.808017015 | -0.179017676 | 0.858552071 | 0.235810707  | 0.814436244 |
| TMSB15B    | 0.273438844  | 0.785162577 | -0.712056061 | 0.479304499 | -1.397274042 | 0.16781996  |
| TMSB4X     | -1.102467498 | 0.273292346 | -1.299817831 | 0.198841516 | -0.840473677 | 0.40420216  |
| TMTC1      | -1.592765767 | 0.114831873 | 1.994881325  | 0.050794986 | -2.020197393 | 0.048135844 |
| TMTC2      | 1.438417925  | 0.153895473 | -1.326530675 | 0.189899804 | -1.974210854 | 0.053276785 |
| TMTC3      | 1.130383841  | 0.261414504 | -0.202819443 | 0.839990941 | -1.018760038 | 0.312679763 |
| TMTC4      | 1.95169097   | 0.054184813 | 0.843195338  | 0.402607376 | 0.934282437  | 0.354152626 |
| TMUB1      | -0.289963239 | 0.772532841 | -2.031552559 | 0.046821589 | -1.512214715 | 0.136078877 |
| TMUB2      | -1.429676279 | 0.156383476 | -1.735633677 | 0.087976214 | -0.86437821  | 0.391052199 |
| TMX1       | 0.741951889  | 0.460110518 | -0.481712483 | 0.631835535 | -0.931024429 | 0.355820606 |
| TMX2       | -0.546595025 | 0.586053117 | 1.820340615  | 0.073903989 | 2.486010207  | 0.015915359 |
| TMX3       | 1.543420145  | 0.126350798 | -0.690351554 | 0.49274575  | -1.178604592 | 0.243518569 |
| TMX4       | -3.689312278 | 0.000390684 | -0.375687024 | 0.708529719 | -1.160653575 | 0.250686158 |
| TNF        | -1.102279774 | 0.27337347  | -2.077146821 | 0.042258023 | -2.266557499 | 0.027282879 |
| TNFAIP1    | 1.184915788  | 0.239270487 | -1.312960184 | 0.194403597 | -1.443597834 | 0.154399998 |
| TNFAIP2    | -2.450359734 | 0.016269318 | -1.157587366 | 0.251810434 | -1.486273306 | 0.142791945 |
| TNFAIP3    | 1.911222365  | 0.05926139  | 0.101088826  | 0.919831031 | -2.224109294 | 0.030172983 |

|               |              |             |              |             |              |             |
|---------------|--------------|-------------|--------------|-------------|--------------|-------------|
| TNFAIP6       | -2.285850881 | 0.024687719 | -1.676710274 | 0.099019231 | -2.342930646 | 0.022695418 |
| TNFAIP8       | 1.190976765  | 0.236894943 | 0.665829473  | 0.508178054 | 0.627122995  | 0.533116531 |
| TNFAIP8L1     | 0.271479109  | 0.786664316 | 1.339279953  | 0.185740842 | 1.92421792   | 0.059392938 |
| TNFAIP8L2     | -1.622546301 | 0.108297003 | 1.768632542  | 0.082250355 | 1.604230173  | 0.114265282 |
| TNFAIP8L2-SCN | 0.969096766  | 0.335177558 | 0.811458587  | 0.420443169 | 1.23614267   | 0.221543826 |
| TNFRSF10A     | 2.438431099  | 0.016779775 | 3.455212974  | 0.001038815 | 3.141575131  | 0.002679657 |
| TNFRSF10B     | 1.453383279  | 0.149707306 | -1.147765302 | 0.255810509 | -1.323322902 | 0.191083089 |
| TNFRSF10C     | -2.326902487 | 0.022288528 | -0.100285784 | 0.920465709 | -0.853450857 | 0.397029961 |
| TNFRSF10D     | 2.092749434  | 0.039277614 | 0.750697065  | 0.455891042 | 1.502563341  | 0.138546623 |
| TNFRSF11A     | -0.881176983 | 0.380644696 | 0.447586387  | 0.656130624 | -0.197810212 | 0.843906842 |
| TNFRSF12A     | -1.632875076 | 0.106101695 | -2.881710995 | 0.005548834 | -2.548688413 | 0.013569235 |
| TNFRSF13B     | -0.172858164 | 0.863163563 | 0.5600854    | 0.577593181 | 0.492999486  | 0.623932541 |
| TNFRSF13C     | 0.785554116  | 0.434258317 | -0.059884345 | 0.95245505  | -0.311217355 | 0.75678613  |
| TNFRSF14      | -1.431746339 | 0.155791519 | -0.694914824 | 0.489902685 | -0.771482351 | 0.443650757 |
| TNFRSF17      | 1.172275443  | 0.244279633 | 0.455944296  | 0.650144524 | 0.864625674  | 0.390917478 |
| TNFRSF18      | -0.266735657 | 0.790302542 | -1.093599799 | 0.278683268 | -0.456865126 | 0.649527856 |
| TNFRSF1A      | -1.708652192 | 0.091073117 | -0.472504949 | 0.638351944 | -1.310247613 | 0.195438611 |
| TNFRSF1B      | -2.13422381  | 0.035631778 | 1.545303535  | 0.127750099 | 1.532072995  | 0.131111031 |
| TNFRSF21      | 2.340581494  | 0.021536188 | 0.400308633  | 0.690410139 | 0.029178491  | 0.976825539 |
| TNFRSF25      | 2.030068942  | 0.045397549 | -1.83229194  | 0.072079387 | -0.628131683 | 0.532460369 |
| TNFRSF4       | -0.731120501 | 0.466665882 | -0.131760756 | 0.895632722 | -0.541127865 | 0.590556677 |
| TNFRSF8       | -0.6909963   | 0.491403516 | 0.241127722  | 0.810312458 | 0.328517436  | 0.743740629 |
| TNFRSF9       | -2.120315703 | 0.036820244 | 0.12220099   | 0.903165221 | 0.417185784  | 0.678130863 |
| TNFSF10       | -0.979197103 | 0.330191829 | 0.174477741  | 0.862101879 | -1.760717719 | 0.083723065 |
| TNFSF12       | -1.996499878 | 0.048999238 | -0.709191547 | 0.481066605 | -1.820681726 | 0.073972745 |
| TNFSF13       | -0.532129524 | 0.595989693 | 2.171682655  | 0.034011431 | 1.36306751   | 0.178294099 |
| TNFSF13B      | -1.239834625 | 0.218363153 | -0.708451287 | 0.481522564 | -2.797642644 | 0.00703587  |
| TNFSF14       | -1.338179845 | 0.184317312 | -2.150442628 | 0.03573016  | -2.663960502 | 0.010056977 |
| TNFSF15       | 0.642582875  | 0.522180979 | 0.056964269  | 0.954770818 | -1.134017178 | 0.261598336 |
| TNFSF4        | -3.082752628 | 0.002745816 | 0.944353192  | 0.348933922 | 0.069627793  | 0.944736915 |
| TNFSF8        | 0.572612515  | 0.568380774 | 0.109630264  | 0.913083689 | -0.976111338 | 0.333189592 |
| TNFSF9        | -1.330188452 | 0.186925207 | -1.472304607 | 0.146382246 | -0.282807695 | 0.77836262  |
| TNIK          | 1.417652795  | 0.159856093 | 0.050756909  | 0.959694846 | 0.552274599  | 0.582948599 |
| TNIP1         | -1.954860922 | 0.053803235 | 0.990482733  | 0.326081152 | 1.07083318   | 0.288818784 |
| TNIP2         | 0.546188697  | 0.58633116  | 0.857465859  | 0.394741422 | 0.520259401  | 0.604924992 |
| TNIP3         | 1.827762435  | 0.071005713 | -0.232556109 | 0.816930511 | -0.668220844 | 0.506726073 |
| TNK1          | 2.001587776  | 0.048438134 | -0.18773942  | 0.851740766 | 0.379185278  | 0.705978274 |
| TNK2          | -0.226110045 | 0.821645051 | 0.03302655   | 0.973767602 | 0.512292898  | 0.610452224 |
| TNKS          | 0.936800672  | 0.351448756 | -1.217168194 | 0.228503923 | -1.432834235 | 0.157441075 |
| TNKS1BP1      | 1.356304779  | 0.178504144 | 2.869491325  | 0.005739442 | 2.633844212  | 0.010884019 |
| TNKS2         | 1.180878739  | 0.240862225 | -0.836479909 | 0.406342078 | -1.469369074 | 0.147305043 |
| TNNC1         | 0.403743972  | 0.687389531 | 0.743399658  | 0.460261499 | 1.366622363  | 0.177182859 |
| TNNC2         | -1.870487742 | 0.064771098 | -1.151467846 | 0.254297344 | -0.879565768 | 0.382837685 |
| TNNI2         | -2.398399481 | 0.018598953 | 1.491029749  | 0.141410441 | 0.628789682  | 0.53203256  |
| TNNT1         | -1.033282317 | 0.304329398 | 0.855988633  | 0.395551221 | 1.103591132  | 0.274470521 |
| TNNT3         | 0.443771903  | 0.658306869 | 1.555653888  | 0.125268594 | 2.212407097  | 0.03101583  |
| TNPO1         | 1.395995717  | 0.166260314 | -0.523180584 | 0.602855641 | -1.777383944 | 0.080912709 |
| TNPO2         | 2.53952323   | 0.012873266 | -1.478795818 | 0.144643412 | -0.877271292 | 0.384071693 |
| TNPO3         | -1.51562511  | 0.133231362 | 1.298248238  | 0.199376577 | 1.2766165    | 0.206984256 |
| TNRC18        | -0.385664753 | 0.700684347 | -0.533144656 | 0.595984747 | -0.564255947 | 0.574823586 |
| TNRC6A        | 2.844616593  | 0.005539987 | 0.683613382  | 0.496960393 | 1.12905239   | 0.263669005 |
| TNRC6B        | -0.464221037 | 0.64364643  | -0.849364298 | 0.39919526  | -0.752077801 | 0.455140607 |
| TNRC6C        | 1.703494858  | 0.092037531 | 0.387969188  | 0.699469052 | 1.031799903  | 0.30658294  |
| TNS1          | -3.261586552 | 0.00158205  | 1.807013342  | 0.075984193 | 0.39721476   | 0.692712687 |
| TNS3          | -1.198077001 | 0.234133698 | 1.799040421  | 0.077251931 | 1.489743927  | 0.141878979 |
| TNS4          | 1.119163543  | 0.266144157 | -0.041406679 | 0.967114893 | 1.235723742  | 0.221698371 |
| TNXB          | 1.075007258  | 0.285337391 | -0.058172203 | 0.953812817 | -0.104229192 | 0.917358308 |
| TOB1          | -0.488884905 | 0.626150702 | 1.047214335  | 0.299375534 | 0.044530132  | 0.964639578 |
| TOB2          | -0.077276326 | 0.938580783 | 0.519087087  | 0.605688948 | 0.63525234   | 0.52784028  |
| TOE1          | 0.017086555  | 0.986406605 | 1.945868995  | 0.056555518 | 1.458188202  | 0.150351133 |
| TOLLIP        | -0.862722258 | 0.390657026 | 1.744769951  | 0.086358816 | 1.544978641  | 0.127960652 |
| TOM1          | -2.151161195 | 0.034229527 | 1.936472207  | 0.057721492 | 2.131639361  | 0.037419484 |
| TOM1L2        | 1.522633236  | 0.131469305 | 1.370020473  | 0.175997572 | 2.176200485  | 0.033756404 |
| TOMM20        | 0.646799194  | 0.51946105  | 1.032625798  | 0.306095622 | 1.186669834  | 0.240346816 |
| TOMM22        | -0.767788623 | 0.444687171 | 0.215054477  | 0.830484516 | 0.680260098  | 0.49913084  |
| TOMM34        | 2.178015515  | 0.032104557 | 2.578050395  | 0.012516725 | 2.609216042  | 0.011605972 |
| TOMM40        | -0.014840427 | 0.988193393 | 0.736045969  | 0.464689899 | 0.448285134  | 0.655669854 |
| TOMM40L       | 0.47266271   | 0.637634885 | 1.125657334  | 0.264979288 | 2.669127649  | 0.009920994 |
| TOMM5         | 1.357971101  | 0.177976752 | -2.336390484 | 0.022972591 | -1.702654575 | 0.094154577 |
| TOMM6         | -0.383690101 | 0.702142192 | -1.956193597 | 0.055297672 | -1.141385387 | 0.258546588 |
| TOMM7         | 0.685303579  | 0.494970378 | 0.372988795  | 0.710525967 | 1.172772776  | 0.24583074  |
| TOMM70A       | 2.032051865  | 0.045192087 | 0.939016948  | 0.351643367 | 2.062661308  | 0.043774546 |



|              |              |             |              |             |              |             |
|--------------|--------------|-------------|--------------|-------------|--------------|-------------|
| TONSL        | -0.650323906 | 0.517192994 | 0.144549092  | 0.88557151  | 0.608763878  | 0.545132251 |
| TOP1         | -2.003820696 | 0.048193621 | 0.534298308  | 0.595191598 | -0.29564429  | 0.768590639 |
| TOP1MT       | -0.176068832 | 0.86064817  | 3.554892105  | 0.000763405 | 3.651080298  | 0.000573898 |
| TOP1P1       | 0.49715386   | 0.620331923 | -0.127076108 | 0.89932277  | -0.477523976 | 0.634839834 |
| TOP2A        | 0.362167926  | 0.718102884 | 1.633878955  | 0.10773923  | 0.804624332  | 0.42442512  |
| TOP2B        | 2.052487577  | 0.043120685 | 3.185020812  | 0.002336902 | 3.602686636  | 0.000667822 |
| TOP3A        | -1.657483438 | 0.101015867 | 2.442963429  | 0.017655417 | 2.766411358  | 0.007655417 |
| TOP3B        | 1.980205804  | 0.050833669 | -1.50419052  | 0.137996448 | -0.923492225 | 0.359696256 |
| TOPBP1       | 0.448628694  | 0.65481253  | 0.047535849  | 0.962250606 | -0.825416168 | 0.412623177 |
| TOPORS       | -1.565745912 | 0.121030544 | -1.463563111 | 0.148749756 | -2.233967186 | 0.029478721 |
| TOR1A        | -1.739443222 | 0.085485905 | 0.054069319  | 0.957067047 | -2.099360963 | 0.040285495 |
| TOR1AIP1     | -1.139216095 | 0.257733281 | 0.427802217  | 0.670390472 | -0.788416289 | 0.433764238 |
| TOR1AIP2     | -2.214496152 | 0.029402595 | 0.65071377   | 0.517818813 | 1.033089962  | 0.305984195 |
| TOR1B        | -2.245059031 | 0.02729429  | 0.594515653  | 0.554495576 | -2.058579251 | 0.044178371 |
| TOR2A        | -1.081512326 | 0.282451541 | -0.714521915 | 0.477790529 | -0.95057605  | 0.345887173 |
| TOR3A        | 0.69729974   | 0.487470435 | 1.440143834  | 0.155240454 | 1.118856124  | 0.267957913 |
| TOX          | -0.84685885  | 0.399392306 | -2.5828993   | 0.012360538 | -1.733852611 | 0.088423758 |
| TOX2         | -0.161613422 | 0.871984207 | -0.328709483 | 0.743567469 | 0.649827099  | 0.5184496   |
| TOX4         | -2.008492668 | 0.047685435 | 0.925388826  | 0.358624839 | 0.937861059  | 0.35232636  |
| TP53         | -0.547214501 | 0.58562934  | 0.850950183  | 0.398320984 | 1.141891249  | 0.258338005 |
| TP53BP1      | 0.15141785   | 0.879995909 | 1.720715221  | 0.090671064 | 1.650285474  | 0.104459374 |
| TP53BP2      | 1.061377663  | 0.29144948  | 1.735488851  | 0.088002053 | 0.85865897   | 0.394173855 |
| TP53I11      | -1.622389025 | 0.108330712 | -0.299802519 | 0.765407105 | -0.122864363 | 0.902652547 |
| TP53I13      | 2.05972278   | 0.042407137 | -1.414828691 | 0.162502531 | -0.379058184 | 0.706072118 |
| TP53I3       | 0.643670728  | 0.521478497 | 0.701414129  | 0.48586909  | -0.196774029 | 0.844713792 |
| TP53INP1     | -0.155770461 | 0.876574039 | -1.301169537 | 0.198381594 | -2.140442326 | 0.036669461 |
| TP53INP2     | -3.373600851 | 0.001108633 | -2.074397679 | 0.042521827 | -1.814970416 | 0.074862518 |
| TP53RK       | 0.946154308  | 0.346684714 | -1.176574923 | 0.244205019 | -0.144860098 | 0.885339256 |
| TP53TG1      | -0.494485176 | 0.622207231 | -0.818785782 | 0.416283585 | -0.732256529 | 0.467052921 |
| TP63         | -0.662757441 | 0.5092342   | -0.035809437 | 0.971558128 | 0.102535231  | 0.9186966   |
| TP73         | 2.345945827  | 0.021247347 | 1.095801915  | 0.277726358 | 1.337218596  | 0.186535107 |
| TP73-AS1     | 2.895584364  | 0.004782345 | 1.19175373   | 0.23824531  | 1.404613461  | 0.165635679 |
| TPBG         | -0.614285479 | 0.540626336 | -0.876524582 | 0.384386129 | -1.031229245 | 0.306848048 |
| TPCN1        | 0.363488928  | 0.717119539 | 1.412560488  | 0.163165837 | 2.224626127  | 0.030136229 |
| TPCN2        | -1.69644144  | 0.093370006 | 1.171163859  | 0.246355349 | 0.347704852  | 0.729359924 |
| TPD52        | 1.820505122  | 0.072112941 | -0.615908215 | 0.540381547 | -0.932474655 | 0.355077516 |
| TPD52L2      | -2.836695937 | 0.005667165 | -0.111519704 | 0.911591969 | -0.452972552 | 0.652311362 |
| TP11         | -1.071188641 | 0.287040864 | 2.114077937  | 0.0388496   | 2.9693805    | 0.004380149 |
| TPK1         | -0.8011366   | 0.425230408 | -0.001253532 | 0.999004158 | -0.117545551 | 0.966846569 |
| TPM1         | -4.558726113 | 1.67E-05    | 1.006684773  | 0.318296877 | 0.392403672  | 0.696243304 |
| TPM2         | 1.297008325  | 0.198050086 | 0.84422489   | 0.402036676 | 2.717262054  | 0.008732735 |
| TPM3         | -2.395092815 | 0.018756795 | 1.120266981  | 0.267249633 | 1.311982924  | 0.194856295 |
| TPM4         | -2.060995526 | 0.042282673 | -0.13766237  | 0.890987388 | 0.127591791  | 0.898927183 |
| TPMT         | 0.261888588  | 0.794025051 | 1.45053748   | 0.152333094 | 0.787656717  | 0.434204878 |
| TPP1         | -1.31133676  | 0.193186921 | 0.781563321  | 0.437672236 | 0.748722619  | 0.457144592 |
| TPP2         | 3.481642261  | 0.000781037 | 0.561633282  | 0.576544871 | 0.624479341  | 0.534838245 |
| TPPP         | -0.084391834 | 0.932938372 | -0.65572167  | 0.514614064 | 0.202163297  | 0.840518633 |
| TPPPP3       | -3.591548578 | 0.000543022 | 0.282701657  | 0.778419045 | 0.790482464  | 0.43256696  |
| TPR          | 1.001185806  | 0.319507529 | 1.475716762  | 0.145466179 | 1.086853964  | 0.281737902 |
| TPRA1        | -0.866435737 | 0.388629357 | 0.254434458  | 0.800066148 | -0.586720629 | 0.559739349 |
| TPRG1        | -0.115095686 | 0.908633933 | -0.122063773 | 0.903273407 | 0.001859058  | 0.998523266 |
| TPRG1L       | -3.464299592 | 0.0008266   | 0.313500691  | 0.755032835 | 0.448034167  | 0.655849871 |
| TPRKB        | -0.199965593 | 0.841973149 | -0.138490373 | 0.890335946 | -0.592092037 | 0.556162051 |
| TPRN         | 0.158578232  | 0.874367908 | 0.407464157  | 0.685177633 | 0.728818467  | 0.469137078 |
| TPSAB1       | -1.741654436 | 0.085095756 | 0.177513735  | 0.859727691 | 0.911695079  | 0.365820904 |
| TPST1        | -4.431810417 | 2.71E-05    | -1.112445381 | 0.27056834  | -1.353374112 | 0.181351292 |
| TPST2        | 1.582486442  | 0.11715945  | -1.573370561 | 0.12111063  | -1.837809566 | 0.071374904 |
| TPT1         | 0.201926712  | 0.840444416 | -0.569510025 | 0.571224629 | 0.055948088  | 0.955581465 |
| TPX2         | -0.33674697  | 0.737116857 | 2.583765459  | 0.012332825 | 2.600635005  | 0.011867593 |
| TRA2A        | -0.580474593 | 0.563091914 | -0.087365387 | 0.930684118 | -0.800511524 | 0.426783435 |
| TRA2B        | 1.059896858  | 0.292118888 | -0.392381873 | 0.696224383 | -0.789502295 | 0.433134689 |
| TRABD        | 0.672737934  | 0.502893141 | -0.881066197 | 0.381943888 | -0.14646933  | 0.884074696 |
| TRADD        | 0.574495449  | 0.567111917 | -0.924831369 | 0.358912307 | -0.699849645 | 0.486906244 |
| TRAF1        | 3.905846979  | 0.000184822 | 0.369307154  | 0.713253067 | 1.81588931   | 0.07471949  |
| TRAF2        | 0.067667347  | 0.946205379 | 2.753736656  | 0.00786988  | 2.8306452    | 0.006431673 |
| TRAF3        | 1.598825639  | 0.113477151 | 0.311301898  | 0.756695089 | 0.018243192  | 0.985509418 |
| TRAF3IP1     | 2.115796239  | 0.037213762 | 1.324641216  | 0.190522112 | 1.464016117  | 0.148757292 |
| TRAF3IP2     | -1.495213858 | 0.138469426 | 2.137754991  | 0.036792706 | 2.60686244   | 0.011677201 |
| TRAF3IP2-AS1 | 1.02312625   | 0.309078539 | -2.318148752 | 0.024013897 | -0.641601853 | 0.523738298 |
| TRAF3IP3     | 2.202026967  | 0.030302873 | 1.785691868  | 0.079413995 | 3.401783966  | 0.001238842 |
| TRAF4        | 0.918074809  | 0.36111243  | 0.025269921  | 0.979927015 | -0.213411716 | 0.83177765  |
| TRAF5        | 1.796970112  | 0.07580299  | 0.478895781  | 0.633825905 | 1.370157979  | 0.176082895 |

|           |              |             |              |             |              |             |
|-----------|--------------|-------------|--------------|-------------|--------------|-------------|
| TRAF6     | -0.482719935 | 0.630504416 | -0.732909647 | 0.466585971 | -0.25286078  | 0.801297812 |
| TRAF7     | -0.610077378 | 0.543397386 | -0.354387777 | 0.724342507 | -1.294696396 | 0.200715703 |
| TRAFD1    | -2.45846586  | 0.015930402 | 0.876298725  | 0.384507839 | -0.571739449 | 0.569776794 |
| TRAIIP    | 1.193129314  | 0.236055366 | 1.860684402  | 0.067896066 | 2.096051823  | 0.040589849 |
| TRAK1     | 0.149821449  | 0.881251519 | -0.033389355 | 0.973479541 | -0.232351841 | 0.81710826  |
| TRAK2     | 0.386085877  | 0.700373584 | 0.684534132  | 0.496383315 | 0.681444659  | 0.498386903 |
| TRAM1     | 1.388695886  | 0.168462619 | -0.954751325 | 0.343693535 | -1.64258702  | 0.106049043 |
| TRAM2     | 0.507130303  | 0.613343677 | 0.495009589  | 0.622476511 | 1.037791318  | 0.303808933 |
| TRANK1    | -2.67206725  | 0.008995833 | 0.774411553  | 0.441854895 | -0.327685024 | 0.744366635 |
| TRAP1     | 1.235385952  | 0.220005374 | 1.62424626   | 0.109783937 | 2.582632746  | 0.012433976 |
| TRAPPC1   | -1.894554418 | 0.061466122 | -2.862284157 | 0.005854686 | -2.516876872 | 0.014717673 |
| TRAPPC10  | 2.218205134  | 0.029139362 | -1.18200085  | 0.242062397 | -1.479246842 | 0.144654464 |
| TRAPPC2   | 0.473329926  | 0.637160768 | -0.782804361 | 0.43694881  | 0.667069205  | 0.507455866 |
| TRAPPC2L  | -0.110400187 | 0.912345731 | -3.110716175 | 0.002901616 | -2.282304724 | 0.026274762 |
| TRAPPC2P1 | 0.89818131   | 0.371562559 | 0.271637304  | 0.786872201 | 1.153018833  | 0.25378001  |
| TRAPPC3   | -1.425341991 | 0.157628533 | 0.797723895  | 0.428307396 | 2.283305246  | 0.026211841 |
| TRAPPC4   | 1.012222774  | 0.314232368 | 0.574440307  | 0.567906779 | 0.790263258  | 0.432693889 |
| TRAPPC5   | -0.771548383 | 0.442468036 | -3.922085389 | 0.000236239 | -3.460336063 | 0.001036675 |
| TRAPPC6A  | -0.132756891 | 0.89469156  | -0.869763633 | 0.388039926 | 0.156934104  | 0.87585885  |
| TRAPPC6B  | 1.151348825  | 0.252736307 | 0.462381726  | 0.645549626 | 0.154486185  | 0.877779504 |
| TRAPPC8   | -0.058275634 | 0.95366243  | -0.802788258 | 0.425397464 | -1.609270401 | 0.113157119 |
| TRAPPC9   | -1.202094827 | 0.232581502 | 2.054142807  | 0.044509874 | 2.002855046  | 0.050022037 |
| TRAT1     | 0.739815697  | 0.461399218 | -1.303286651 | 0.197662845 | -1.155457012 | 0.252789026 |
| TRDMT1    | 0.977050655  | 0.331247251 | -2.345188205 | 0.02248492  | -1.68552712  | 0.097428619 |
| TREM1     | -4.631466587 | 1.26E-05    | 0.011992095  | 0.990473364 | -0.742230817 | 0.461036433 |
| TREML1    | -3.757961723 | 0.000309027 | 1.486431216  | 0.142618914 | 0.810411561  | 0.421119958 |
| TREML2    | -3.213122124 | 0.001840704 | 0.489107423  | 0.626623084 | 0.845469665  | 0.401431611 |
| TREML3    | -4.473560684 | 2.31E-05    | 0.584513186  | 0.561157765 | -0.545720467 | 0.587416365 |
| TREML4    | -2.288772452 | 0.02450974  | -0.828952143 | 0.410553687 | -1.512601061 | 0.135980823 |
| TRERF1    | 0.254496128  | 0.799711572 | -1.015708251 | 0.314016138 | -1.821043681 | 0.073921438 |
| TREX1     | 0.232564407  | 0.816644718 | -0.40471917  | 0.687183101 | -1.776448729 | 0.081068301 |
| TREX2     | 0.930221091  | 0.354825059 | -0.409968976 | 0.683349614 | 0.963918541  | 0.339213523 |
| TRIAP1    | 0.734875418  | 0.464387383 | -0.049537574 | 0.960662282 | 0.150248365  | 0.881106267 |
| TRIB1     | -5.389482568 | 5.94E-07    | -0.977053047 | 0.332628926 | -1.675959017 | 0.099297951 |
| TRIB2     | 1.946008547  | 0.054874577 | 0.189596271  | 0.850292091 | 0.744646316  | 0.459586122 |
| TRIB3     | 0.359133275  | 0.720363656 | 2.393928857  | 0.019946812 | 4.192297827  | 9.87E-05    |
| TRIM10    | -3.340349065 | 0.001233057 | 2.428572945  | 0.018302042 | 1.395794285  | 0.168263029 |
| TRIM11    | -0.643887685 | 0.521338457 | 1.425912899  | 0.159291093 | 1.778201967  | 0.080776818 |
| TRIM13    | 0.941642994  | 0.348977195 | -1.300549826 | 0.198592353 | -1.041761565 | 0.301980181 |
| TRIM14    | 1.17110374   | 0.244747725 | -1.749875235 | 0.08546581  | -1.978239124 | 0.05280836  |
| TRIM16    | -0.710371465 | 0.479369615 | 2.105041008  | 0.039660704 | 2.814919708  | 0.006713329 |
| TRIM16L   | -0.551767684 | 0.582519008 | 0.882851883  | 0.38098632  | 1.760394546  | 0.083778352 |
| TRIM17    | 1.055369325  | 0.294172106 | -2.676426206 | 0.009674703 | -2.304016715 | 0.024939029 |
| TRIM2     | 0.591923728  | 0.555433474 | 0.729899076  | 0.468410157 | 0.034273235  | 0.972780629 |
| TRIM21    | -2.534941336 | 0.013030873 | 1.177241011  | 0.243941257 | 0.020783539  | 0.983491896 |
| TRIM22    | -0.109425297 | 0.91311663  | 0.577836782  | 0.565626628 | -2.143436543 | 0.036417364 |
| TRIM23    | 0.187987132  | 0.851323564 | -0.710866102 | 0.480036063 | -1.604403333 | 0.114227065 |
| TRIM24    | -0.475989399 | 0.635272475 | 0.465234257  | 0.643517968 | 1.124460861  | 0.265594309 |
| TRIM25    | 0.623915944  | 0.534311799 | 0.25305279   | 0.801128437 | -1.059436988 | 0.293930048 |
| TRIM26    | -1.508882204 | 0.134944236 | -0.918982351 | 0.361937474 | -0.404774427 | 0.687178872 |
| TRIM27    | -1.258119331 | 0.211707468 | -0.835978302 | 0.40662189  | -1.0936251   | 0.278781842 |
| TRIM28    | -0.218344494 | 0.827670956 | 1.614955233  | 0.111785825 | 1.794294618  | 0.07814196  |
| TRIM3     | 0.8276502    | 0.410128254 | -1.546974233 | 0.127346913 | -0.446448164 | 0.656987983 |
| TRIM32    | 2.272869646  | 0.025492364 | 0.397949415  | 0.692138676 | 1.233412527  | 0.222552418 |
| TRIM33    | 0.9950531    | 0.32246401  | -1.792541925 | 0.078298266 | -2.920994497 | 0.005014223 |
| TRIM34    | -0.058960487 | 0.953118507 | -1.085490184 | 0.282227065 | -1.847222406 | 0.069977847 |
| TRIM35    | 2.050054796  | 0.043362918 | -0.35935248  | 0.720645555 | -1.276844399 | 0.206904343 |
| TRIM36    | 2.173170782  | 0.032479195 | 1.442261019  | 0.154644745 | -0.188573551 | 0.851105923 |
| TRIM37    | 1.331920601  | 0.1863576   | 0.523235236  | 0.602817855 | 0.735188833  | 0.46527953  |
| TRIM38    | -1.575614258 | 0.118736446 | 0.377277547  | 0.707353954 | -0.401775837 | 0.689371857 |
| TRIM39    | -1.370460265 | 0.174061427 | 0.822789893  | 0.414021055 | 1.752542081  | 0.085131087 |
| TRIM4     | 1.042093477  | 0.300249292 | 1.359066205  | 0.179423719 | 0.256713951  | 0.798336469 |
| TRIM41    | -0.138294341 | 0.890326699 | -1.520853509 | 0.133767856 | -1.526255699 | 0.132551132 |
| TRIM44    | 0.504460542  | 0.615210312 | -0.0115588   | 0.990817562 | -0.574894367 | 0.567655674 |
| TRIM45    | -0.37964577  | 0.705131518 | -0.42612137  | 0.671607707 | -1.775212955 | 0.081274279 |
| TRIM46    | 0.438946619  | 0.661786075 | 0.104357289  | 0.917248369 | 0.309340436  | 0.758205828 |
| TRIM47    | -0.755253709 | 0.452132187 | 0.401070197  | 0.689852514 | 0.344381235  | 0.731844106 |
| TRIM5     | -2.510793169 | 0.013890555 | 1.366131106  | 0.177208265 | -0.446805406 | 0.656731556 |
| TRIM52    | 1.553527247  | 0.123919745 | -1.489439238 | 0.141827503 | -1.743281676 | 0.08674962  |
| TRIM56    | 1.246479522  | 0.215926914 | -1.373491223 | 0.174922539 | -1.701438715 | 0.094383972 |
| TRIM58    | -3.650056818 | 0.0004462   | 1.162698155  | 0.249746838 | 0.185876134  | 0.853210733 |
| TRIM59    | 0.439228441  | 0.661582666 | -0.947787238 | 0.347197521 | -0.991812827 | 0.325537238 |

|          |              |             |              |             |              |             |
|----------|--------------|-------------|--------------|-------------|--------------|-------------|
| TRIM6    | -1.860367157 | 0.066204814 | -0.834390815 | 0.407508216 | -2.293286031 | 0.025591451 |
| TRIM61   | 1.867750248  | 0.065156306 | -1.085272929 | 0.282322432 | -0.893771995 | 0.375252991 |
| TRIM62   | 1.54537326   | 0.125878094 | -1.692650622 | 0.095925209 | -2.193927727 | 0.032389075 |
| TRIM64B  | -1.221977683 | 0.225009509 | 1.995248082  | 0.050753854 | -0.999188092 | 0.321983621 |
| TRIM65   | 0.519646347  | 0.604626863 | 0.624252026  | 0.534927002 | 1.643504202  | 0.105858624 |
| TRIM66   | 1.943811634  | 0.055143239 | 1.186439885  | 0.240319604 | 1.567418974  | 0.12262697  |
| TRIM68   | 0.655251102  | 0.514031241 | -0.392882705 | 0.695856478 | 0.084909134  | 0.93263519  |
| TRIM69   | 0.381589039  | 0.703694589 | 2.250389116  | 0.0282589   | 1.348239024  | 0.18298695  |
| TRIM7    | 0.49686191   | 0.620536957 | 1.044320864  | 0.300700296 | 0.495858782  | 0.621926416 |
| TRIM78P  | -0.174929452 | 0.861540652 | -0.110109345 | 0.912705423 | -0.582373603 | 0.562642786 |
| TRIM8    | -0.729154269 | 0.467861513 | -0.828639896 | 0.410728955 | -0.999567341 | 0.321801594 |
| TRIM9    | 1.452967498  | 0.149822459 | 0.447544643  | 0.65616058  | 0.103018343  | 0.918314899 |
| TRIO     | 2.95479012   | 0.00402256  | 0.058672111  | 0.953416364 | -0.478360029 | 0.634248462 |
| TRIOBP   | -1.133680339 | 0.260036244 | 0.235784936  | 0.814435966 | 0.089062804  | 0.929348422 |
| TRIP10   | 0.150537663  | 0.88068816  | -0.365721649 | 0.715912577 | 1.126394309  | 0.264782374 |
| TRIP11   | 0.357606251  | 0.72150221  | 0.182167221  | 0.856091137 | 0.384280377  | 0.702219917 |
| TRIP12   | -1.028764073 | 0.306436082 | 2.446800663  | 0.017486499 | 1.103799796  | 0.274380755 |
| TRIP13   | 0.800706495  | 0.425478089 | 1.382691542  | 0.172097166 | 0.913109294  | 0.365083188 |
| TRIP4    | -0.30690967  | 0.759643925 | 0.582856515  | 0.562265024 | 0.792263461  | 0.431536511 |
| TRIP6    | 0.318350132  | 0.750980663 | 1.884991885  | 0.064479218 | 1.28960592   | 0.202466082 |
| TRIT1    | 0.267934463  | 0.789382615 | 2.587051665  | 0.012228197 | 3.61322278   | 0.000646201 |
| TRMT1    | 1.43535713   | 0.154763115 | -0.611401628 | 0.543339437 | 0.330746151  | 0.742065405 |
| TRMT11   | 2.55830517   | 0.012244987 | -0.77385454  | 0.442181642 | -0.889624015 | 0.377457681 |
| TRMT112  | -0.585274224 | 0.559875091 | -1.111495117 | 0.270973504 | -0.473648167 | 0.637584463 |
| TRMT12   | 0.634990933  | 0.527097222 | 1.997457914  | 0.050506631 | 1.817195208  | 0.074516617 |
| TRMT1L   | 0.270871881  | 0.787129797 | 0.31331175   | 0.755175626 | -0.927215581 | 0.357777034 |
| TRMT2A   | 0.602077981  | 0.548684775 | -0.402514906 | 0.688795159 | -0.033161076 | 0.973663556 |
| TRMT2B   | 0.905223498  | 0.367841647 | 2.838584852  | 0.006295851 | 4.040712338  | 0.000163449 |
| TRMT5    | 0.533710538  | 0.594899875 | -0.161018303 | 0.872642442 | 0.370278016  | 0.712566315 |
| TRMT6    | 0.237454388  | 0.812861381 | -0.413105018 | 0.681063613 | -0.519965539 | 0.605128466 |
| TRMT61A  | 0.724066028  | 0.470963582 | 0.04349975   | 0.96545362  | 0.144534431  | 0.885595208 |
| TRMT61B  | 2.536872124  | 0.012964248 | -0.967660841 | 0.337259619 | -0.511165107 | 0.611236552 |
| TRMU     | 0.953351595  | 0.343047562 | 0.544495485  | 0.588202521 | 1.476351333  | 0.145427522 |
| TRNAU1AP | 0.201790149  | 0.84055085  | -0.943307418 | 0.349463832 | -0.167730247 | 0.867397231 |
| TRNP1    | 0.20030164   | 0.84171115  | -2.035907896 | 0.046367995 | -1.431072096 | 0.157943348 |
| TRNT1    | 1.75116767   | 0.083433906 | -0.435743127 | 0.664651874 | -1.00667435  | 0.318403209 |
| TRO      | 1.317474591  | 0.191131216 | -0.906557043 | 0.368418197 | 1.541618814  | 0.128774938 |
| TROAP    | 0.83864867   | 0.403959872 | 0.201322057  | 0.841156063 | 1.452118841  | 0.152025185 |
| TROVE2   | -1.165687234 | 0.246919922 | -0.271403444 | 0.787051152 | -1.664839684 | 0.10150716  |
| TRPC1    | 1.502886978  | 0.136481676 | -0.41274495  | 0.68132593  | -0.920470458 | 0.361258713 |
| TRPC2    | -0.114899876 | 0.908788681 | -1.489244689 | 0.141878584 | -1.626385088 | 0.109458972 |
| TRPC4AP  | -1.095269707 | 0.276414819 | 1.61814772   | 0.111094649 | 2.165208201  | 0.034629488 |
| TRPC6    | 1.252998885  | 0.213556109 | 0.077916327  | 0.938164666 | 0.160875715  | 0.872767817 |
| TRPM2    | -0.360334105 | 0.719468756 | 1.702609542  | 0.094032802 | 0.912688781  | 0.365302446 |
| TRPM4    | -0.101900347 | 0.91906976  | 0.894031383  | 0.375025792 | 0.793719436  | 0.430695199 |
| TRPM5    | 0.97925791   | 0.330161962 | 0.952958942  | 0.344593152 | 0.729247679  | 0.468876601 |
| TRPM6    | 0.723750737  | 0.471156179 | -0.076354351 | 0.939401795 | -0.116311616 | 0.907819944 |
| TRPM7    | 0.909391111  | 0.365650743 | -0.193610874 | 0.847161764 | -0.570508133 | 0.570605687 |
| TRPS1    | 1.42650951   | 0.157292405 | 0.434006649  | 0.665905055 | 0.215469245  | 0.830181048 |
| TRPT1    | 0.836498539  | 0.40516129  | 0.418108893  | 0.677422287 | 0.380246826  | 0.705194621 |
| TRPV1    | 0.932439037  | 0.353684603 | -0.070730591 | 0.943857193 | 0.316802261  | 0.752566717 |
| TRPV2    | -0.657426699 | 0.512638436 | 1.348201058  | 0.182872024 | 2.19328849   | 0.032437521 |
| TRPV4    | -3.084376692 | 0.002732354 | 0.585237157  | 0.560674229 | 0.844263211  | 0.402099582 |
| TRPV5    | 0.538156218  | 0.591840371 | -1.15679424  | 0.252131767 | -0.537485604 | 0.593052797 |
| TRPV6    | -0.002102295 | 0.998327415 | -0.329447029 | 0.743012916 | 1.046451004  | 0.299829868 |
| TRRAP    | 1.468234859  | 0.145638969 | 0.368590119  | 0.713784636 | 0.420050876  | 0.676048874 |
| TRUB1    | 1.273792575  | 0.206122107 | -1.709242673 | 0.092789491 | -1.813151414 | 0.075146329 |
| TRUB2    | 1.027169396  | 0.307181961 | 0.90826079   | 0.367525207 | 2.637666629  | 0.010775716 |
| TSC1     | 1.867043833  | 0.065256021 | 1.366409945  | 0.177121256 | 1.746719264  | 0.086145846 |
| TSC2     | -0.325818111 | 0.745342655 | 0.558357344  | 0.5787646   | 1.214275741  | 0.229716955 |
| TSC22D1  | -5.394999603 | 5.81E-07    | 1.325967855  | 0.190085012 | -0.140124675 | 0.889062156 |
| TSC22D2  | -0.484589795 | 0.629182528 | -1.466721593 | 0.147890887 | -3.512345621 | 0.000883753 |
| TSC22D3  | 0.338904888  | 0.735496243 | 0.285627742  | 0.776187964 | -0.350714806 | 0.727112696 |
| TSC22D4  | -1.904126251 | 0.060191723 | -1.139574453 | 0.25918075  | -1.682901804 | 0.097938632 |
| TSEN15   | 1.628585704  | 0.107008973 | -2.157949846 | 0.035114184 | -1.708220467 | 0.093110316 |
| TSEN2    | 1.885706244  | 0.062664312 | -0.891675725 | 0.376276806 | 0.181101435  | 0.856939081 |
| TSEN34   | -1.85017284  | 0.067675769 | -0.709604254 | 0.480812505 | -1.472490686 | 0.146463307 |
| TSEN54   | 0.136343617  | 0.891863967 | 0.129662242  | 0.897285418 | 0.815800217  | 0.418056414 |
| TSPM     | 0.569977783  | 0.570158563 | 4.124777922  | 0.000120752 | 4.446081097  | 4.17E-05    |
| TSG101   | -2.513993073 | 0.013773783 | 0.881441916  | 0.381742284 | 0.990388987  | 0.32622629  |
| TSGA10   | 0.664353795  | 0.50821711  | 0.046849681  | 0.962795101 | -1.306625005 | 0.196658466 |
| TSGA14   | 1.301702658  | 0.196446864 | 0.008785347  | 0.993020757 | 1.157340068  | 0.252025565 |

|           |              |             |              |             |              |             |
|-----------|--------------|-------------|--------------|-------------|--------------|-------------|
| TSHR      | -0.780376023 | 0.437283072 | -0.872313939 | 0.386659129 | -0.087936143 | 0.930239821 |
| TSHZ1     | 0.606267153  | 0.545912623 | -0.654334532 | 0.515500686 | -1.132982024 | 0.262029114 |
| TSHZ2     | 2.888525671  | 0.004881254 | 2.363514021  | 0.021498639 | 2.189799452  | 0.032703069 |
| TSHZ3     | -2.419521791 | 0.017618296 | -0.645009665 | 0.521481956 | -1.3766502   | 0.174076726 |
| TSIX      | -0.065177596 | 0.94818181  | 2.291692993  | 0.025598715 | 2.870963026  | 0.005758669 |
| TSKS      | 0.223354173  | 0.823782345 | 0.194836855  | 0.846206314 | 0.703181962  | 0.484843406 |
| TSN       | -0.54296442  | 0.588539678 | 0.899914517  | 0.371912984 | 1.339531124  | 0.185786266 |
| TSNARE1   | 4.559430951  | 1.66E-05    | -1.716093448 | 0.091519632 | -1.764811186 | 0.083025387 |
| TSNAX     | 0.542079621  | 0.589146417 | 0.34027026   | 0.734890922 | -0.472416462 | 0.638457759 |
| TSPAN13   | 0.735909006  | 0.463761304 | 0.718856225  | 0.475135891 | 0.807129725  | 0.42299235  |
| TSPAN14   | 0.059738485  | 0.952500633 | 0.861577841  | 0.392492703 | 1.07231395   | 0.288159191 |
| TSPAN15   | -1.180168014 | 0.241143235 | -1.864268056 | 0.06738291  | -1.202098804 | 0.234362696 |
| TSPAN16   | -0.07321115  | 0.941805788 | -0.60844322  | 0.54528567  | -0.665314202 | 0.5085691   |
| TSPAN17   | -0.690609421 | 0.491645475 | 0.275125824  | 0.784204138 | 0.357385663  | 0.722140852 |
| TSPAN18   | -0.720547541 | 0.473115378 | 1.077248893  | 0.285860405 | 1.749935034  | 0.085584191 |
| TSPAN2    | -3.686045856 | 0.000395041 | -1.897825498 | 0.062734729 | -1.854811091 | 0.068868375 |
| TSPAN3    | 1.706033537  | 0.091561764 | 1.786902254  | 0.07921589  | 1.486776439  | 0.142659307 |
| TSPAN31   | -0.313070562 | 0.754974713 | 1.70816606   | 0.092990365 | 2.851296536  | 0.006078363 |
| TSPAN32   | 0.612923552  | 0.541522383 | -2.314830246 | 0.024207783 | -0.654284756 | 0.515595286 |
| TSPAN33   | -2.200949283 | 0.030381802 | 3.198770156  | 0.002244447 | 3.327111781  | 0.001551169 |
| TSPAN4    | 1.644320486  | 0.103711131 | -0.489878874 | 0.626080408 | 0.238521149  | 0.812343941 |
| TSPAN5    | -3.450265641 | 0.000865294 | 0.221579702  | 0.825424815 | 0.754158088  | 0.453900647 |
| TSPAN6    | -0.3705639   | 0.711861128 | -0.31932346  | 0.750636551 | 2.184264799  | 0.033128229 |
| TSPAN7    | -1.588798909 | 0.115725678 | 0.330379683  | 0.742311859 | 0.897565909  | 0.37324366  |
| TSPAN9    | -4.582845912 | 1.52E-05    | 1.824609882  | 0.073247802 | 0.809506066  | 0.421636072 |
| TSPEAR    | -0.711049412 | 0.478951525 | -1.833636582 | 0.07187649  | -1.065046009 | 0.291406632 |
| TSPO      | -0.793521063 | 0.429628563 | -0.092208514 | 0.926852346 | -0.142420638 | 0.887256794 |
| TSPO2     | -2.520981336 | 0.013521826 | 0.466744969  | 0.642443099 | 0.379868272  | 0.705474039 |
| TSPY26P   | 1.602900939  | 0.112573317 | -1.763909901 | 0.083050299 | -1.298359571 | 0.19946314  |
| TSPYL1    | -0.676672698 | 0.500404924 | 1.29036544   | 0.202080092 | 1.009445721  | 0.317084577 |
| TSPYL2    | 1.750998571  | 0.08346321  | -0.642378536 | 0.523176253 | 1.425027927  | 0.159675628 |
| TSPYL4    | 0.710176705  | 0.479489761 | -2.182602601 | 0.033156353 | -2.354673926 | 0.02205466  |
| TSPYL5    | 2.046507506  | 0.043718218 | -0.226329243 | 0.821746653 | 0.153512794  | 0.878543439 |
| TSR1      | 3.3324428    | 0.001264514 | 2.790975962  | 0.007115905 | 2.970625043  | 0.00436487  |
| TSR2      | -1.202132633 | 0.232566932 | 1.484385493  | 0.143159128 | 1.697851784  | 0.095063398 |
| TSSC1     | -0.488141498 | 0.626674999 | 1.276483687  | 0.206907541 | 2.204392032  | 0.03160502  |
| TSSC4     | -1.548812943 | 0.125049012 | 1.15604842   | 0.252434202 | 0.975234432  | 0.333620453 |
| TSSK3     | 1.726399301  | 0.087817417 | -2.070640497 | 0.042884671 | 0.204954978  | 0.838347328 |
| TSSK4     | 1.571463968  | 0.119697005 | 0.152514179  | 0.879314431 | 0.65471622   | 0.515319458 |
| TSSK6     | 0.296678856  | 0.767417292 | -1.465692301 | 0.148170349 | -1.164835175 | 0.249003137 |
| TST       | -2.398103255 | 0.018613045 | 1.377686542  | 0.173629801 | 0.153391388  | 0.878638729 |
| TSTA3     | -2.810950294 | 0.006099283 | -0.390557508 | 0.69756516  | -0.367370206 | 0.714721813 |
| TSTD1     | 0.255115331  | 0.799234842 | 0.736059127  | 0.464681953 | 0.839021634  | 0.405009596 |
| TSTD2     | 1.253082695  | 0.213525756 | -0.44953064  | 0.654736069 | -0.783289016 | 0.436743802 |
| TTBK2     | 0.273940279  | 0.784778459 | -0.908378758 | 0.367463427 | -2.031708335 | 0.046918041 |
| TTC1      | -2.566286194 | 0.011986482 | 1.557138323  | 0.124915882 | 1.889403293  | 0.063997239 |
| TTC12     | 2.797651658  | 0.006334124 | 0.439651794  | 0.66183459  | 1.362210625  | 0.178562754 |
| TTC13     | 1.657371153  | 0.101038616 | -2.322654836 | 0.023752839 | -1.640684485 | 0.106444922 |
| TTC14     | 1.650288605  | 0.102481971 | -1.998397217 | 0.050401861 | -2.437939802 | 0.017956428 |
| TTC15     | -0.816033017 | 0.416705105 | -1.715059274 | 0.091710403 | -2.225312832 | 0.030087455 |
| TTC16     | 1.439315028  | 0.153641885 | -3.103738379 | 0.002960753 | -1.554353201 | 0.125710365 |
| TTC17     | 1.171074462  | 0.244759429 | -1.19437223  | 0.237227945 | -1.005546197 | 0.318941045 |
| TTC18     | 2.010063807  | 0.047515569 | -0.921202569 | 0.360787231 | -0.834783837 | 0.407371759 |
| TTC19     | 0.645437877  | 0.520338416 | 1.088219828  | 0.281030761 | 0.984228592  | 0.329218758 |
| TTC21A    | 0.476500028  | 0.634910191 | 1.734416744  | 0.088193528 | 1.528241011  | 0.13205825  |
| TTC21B    | 1.773268555  | 0.079676204 | 0.621595431  | 0.536660584 | 0.532767769  | 0.596293389 |
| TTC22     | 1.161888139  | 0.248451659 | -4.042984303 | 0.00015861  | -3.116077685 | 0.002884762 |
| TTC23     | 0.279492064  | 0.78052917  | 1.270954057  | 0.20885424  | 0.788935757  | 0.433463039 |
| TTC24     | 1.568523934  | 0.120381196 | -1.155785567 | 0.252540852 | -0.802921915 | 0.425400349 |
| TTC25     | -1.539169737 | 0.127384364 | 0.468453553  | 0.641228369 | 1.448752879  | 0.152959848 |
| TTC26     | -0.6850687   | 0.495117846 | -1.639937002 | 0.106469229 | -2.291364391 | 0.025709874 |
| TTC27     | 0.76424614   | 0.44678396  | 2.556819619  | 0.013221914 | 3.080184483  | 0.003198524 |
| TTC28     | -0.730261355 | 0.467188101 | 0.960792668  | 0.340672666 | 1.735672601  | 0.088098551 |
| TTC28-AS1 | 2.438518775  | 0.016775972 | -1.635880083 | 0.107318362 | 0.335414676  | 0.738560358 |
| TTC3      | 2.897441569  | 0.00475663  | 1.628697652  | 0.108835173 | 2.11123515   | 0.039209683 |
| TTC30A    | -0.776527261 | 0.439539277 | -1.155754404 | 0.252553498 | -1.734264686 | 0.088350039 |
| TTC30B    | -0.590076936 | 0.556665304 | -0.752135391 | 0.455032455 | -1.421020784 | 0.160832198 |
| TTC31     | 1.516351588  | 0.133047844 | -1.744228505 | 0.086453977 | 0.04457138   | 0.964606846 |
| TTC32     | 0.351045924  | 0.726400727 | 0.1764932    | 0.860525619 | -0.439394351 | 0.662059652 |
| TTC33     | 0.750832185  | 0.454775321 | -0.00211525  | 0.998319585 | -0.576148999 | 0.566813239 |
| TTC35     | 0.19498766   | 0.845856263 | -1.575497339 | 0.120619027 | -1.729352519 | 0.089232131 |
| TTC37     | 1.709189982  | 0.090973029 | 0.584560097  | 0.561126427 | 0.568287269  | 0.572102209 |

|         |              |             |              |             |              |             |
|---------|--------------|-------------|--------------|-------------|--------------|-------------|
| TTC38   | -0.490288032 | 0.625161652 | -2.113799611 | 0.038874364 | -1.641689942 | 0.106235557 |
| TTC39A  | -0.195333847 | 0.845586091 | -0.427747572 | 0.670430031 | -0.043242486 | 0.965661411 |
| TTC39B  | 0.822140989  | 0.413239333 | -1.467997647 | 0.147545002 | -2.242342707 | 0.028899983 |
| TTC39C  | 1.224483949  | 0.224067906 | 1.618577214  | 0.111001928 | 1.983030328  | 0.052255829 |
| TTC4    | 0.383951796  | 0.701948924 | -3.170395202 | 0.00243917  | -2.543700371 | 0.013743763 |
| TTC5    | 0.26294024   | 0.356516382 | -1.456669293 | 0.150637925 | -1.7177114   | 0.09135167  |
| TTC7A   | -1.110136202 | 0.269992674 | 2.420458452  | 0.018675968 | 1.65442684   | 0.103612286 |
| TTC7B   | -2.434558706 | 0.016948534 | 1.435272037  | 0.156618014 | -0.194441721 | 0.846530737 |
| TTC8    | 0.420747276  | 0.674974911 | -0.757956117 | 0.451567421 | -0.334236802 | 0.739444162 |
| TTC9    | -0.593407631 | 0.554444678 | -2.517175359 | 0.014635914 | -1.296392537 | 0.200135004 |
| TTC9C   | 0.318948071  | 0.750528742 | -2.39621286  | 0.01983443  | -2.854000442 | 0.006033456 |
| TTF1    | -0.524391414 | 0.601336998 | 2.179939989  | 0.033363088 | 1.828614844  | 0.072762177 |
| TTF2    | 2.111533467  | 0.037588261 | 1.684892805  | 0.09742094  | -0.196044778 | 0.845281812 |
| TTI1    | -0.792727425 | 0.43008845  | -0.565726538 | 0.573777142 | 0.163053476  | 0.871060857 |
| TTK     | 0.218896589  | 0.827242197 | 2.640736708  | 0.010629439 | 2.811149627  | 0.006782525 |
| TTL     | 0.902951795  | 0.369039369 | 0.670086234  | 0.505480638 | 0.342857508  | 0.732983959 |
| TLLL1   | 0.002295755  | 0.998173499 | 2.095025966  | 0.040576789 | 2.45050173   | 0.017401476 |
| TLLL11  | 0.376113908  | 0.707745853 | -2.352723511 | 0.02207459  | -3.459061382 | 0.001040721 |
| TLLL12  | -0.758093424 | 0.450439308 | 0.491023179  | 0.625275831 | 0.723996923  | 0.472068781 |
| TLLL3   | 0.259207865  | 0.796085881 | -0.684445446 | 0.496438883 | 0.617197779  | 0.539595303 |
| TLLL4   | -4.232015085 | 5.71E-05    | 0.913299433  | 0.364892392 | 1.047073113  | 0.299545393 |
| TLLL5   | 0.337683773  | 0.736413164 | -1.213272124 | 0.229978109 | -0.437882156 | 0.663149001 |
| TTN     | -0.295596787 | 0.768240856 | -0.396160918 | 0.693450159 | -0.106785077 | 0.915339519 |
| TTPAL   | -1.448484459 | 0.151068429 | 1.268358854  | 0.209772561 | 1.84913086   | 0.069697421 |
| TTYH2   | 0.034542087  | 0.972523839 | 0.265967957  | 0.791213655 | -0.483934017 | 0.630311909 |
| TTYH3   | -1.133710844 | 0.260023514 | -0.30881394  | 0.75857734  | -0.421229335 | 0.675193255 |
| TUB     | 1.46862475   | 0.145533336 | -1.202909736 | 0.233932758 | -0.612940899 | 0.542386374 |
| TUBA1A  | -2.147148747 | 0.03455731  | -1.286032192 | 0.203577873 | -1.016619503 | 0.313688359 |
| TUBA1B  | -0.689956688 | 0.492053851 | -0.534854086 | 0.594809671 | -0.080735941 | 0.935938595 |
| TUBA1C  | -2.708764347 | 0.008128468 | 0.243454353  | 0.808518467 | -0.331772802 | 0.741294139 |
| TUBA3D  | 0.762740877  | 0.447676651 | -0.834410891 | 0.407497    | -0.341195147 | 0.734228209 |
| TUBA4A  | -2.123454503 | 0.036549069 | 0.437791801  | 0.663174624 | 0.62996928   | 0.531266072 |
| TUBA8   | -4.560962099 | 1.65E-05    | 1.085315746  | 0.282303635 | -0.335305593 | 0.738642193 |
| TUBB    | -0.25976978  | 0.795653783 | -0.686206341 | 0.4953362   | -0.147442991 | 0.883309724 |
| TUBB1   | -4.975605223 | 3.24E-06    | 0.772865605  | 0.442762108 | -0.441391208 | 0.660622289 |
| TUBB2A  | -2.701552392 | 0.008292666 | 1.464917602  | 0.14838096  | -0.115839188 | 0.908192651 |
| TUBB2C  | -1.40398441  | 0.163875497 | 0.922920639  | 0.359898756 | 1.672378319  | 0.10000503  |
| TUBB3   | 0.745886769  | 0.457742095 | -0.835249831 | 0.407028463 | -1.285302081 | 0.203954862 |
| TUBB4   | -0.282325383 | 0.778363131 | -1.463001722 | 0.14890282  | -0.341320844 | 0.734134101 |
| TUBB6   | -0.303728536 | 0.762058346 | 1.857221335  | 0.068395084 | -0.27666369  | 0.783052677 |
| TUBBP5  | 0.8019085    | 0.424786115 | 0.808905909  | 0.421898166 | 0.927432121  | 0.357665621 |
| TUBD1   | 1.940909166  | 0.055499894 | 0.550550406  | 0.584071019 | 2.090481353  | 0.041106707 |
| TUBE1   | 1.737185904  | 0.085885704 | -1.226537409 | 0.224987118 | -1.279119316 | 0.206107894 |
| TUBG1   | 0.816857337  | 0.416236356 | -2.704836146 | 0.008971498 | -1.481020178 | 0.144182608 |
| TUBG2   | 1.92238538   | 0.057822449 | -0.650091651 | 0.518217669 | -0.030192967 | 0.976020056 |
| TUBGCP2 | 0.158187202  | 0.87467509  | 0.56963599   | 0.571139743 | 1.319548527  | 0.192332777 |
| TUBGCP3 | 1.91162068   | 0.059209531 | -0.303706384 | 0.762446028 | -0.648717159 | 0.519161615 |
| TUBGCP4 | 1.009741501  | 0.315413195 | -0.778946573 | 0.439199903 | -0.851982727 | 0.397837388 |
| TUBGCP5 | 3.50209034   | 0.000730362 | 0.550535091  | 0.584081451 | 0.991148698  | 0.325858515 |
| TUBGCP6 | 2.372886838  | 0.019848012 | -0.166762421 | 0.868141065 | 0.842020067  | 0.403343349 |
| TUFM    | -0.336621002 | 0.737211497 | 2.364669822  | 0.02143775  | 1.797319179  | 0.077654853 |
| TUFT1   | -2.919947846 | 0.004454961 | -0.233092011 | 0.816516348 | 0.088467404  | 0.929819483 |
| TUG1    | 0.847524521  | 0.399023364 | -0.448910183 | 0.65518097  | 1.110534759  | 0.271494473 |
| TULP3   | -1.136739197 | 0.258761925 | -1.4115472   | 0.163462836 | -0.095519778 | 0.924241545 |
| TULP4   | 1.979660548  | 0.050896055 | 1.555343057  | 0.12534255  | 1.230944393  | 0.223467118 |
| TUSC1   | 0.768278589  | 0.444397612 | -0.311329026 | 0.756674573 | -2.339251669 | 0.022899547 |
| TUSC2   | -0.105837939 | 0.915954059 | -2.674224532 | 0.009731251 | -2.812416528 | 0.0067592   |
| TUSC3   | -2.052191276 | 0.043150126 | 1.291772853  | 0.2015954   | 0.984654191  | 0.329011434 |
| TUT1    | -0.400016202 | 0.690122933 | 0.965069919  | 0.338544485 | 1.839347857  | 0.071144999 |
| TWF1    | -0.309770746 | 0.757474455 | -0.673648369 | 0.503229352 | -1.17345257  | 0.245560407 |
| TWF2    | -1.471726875 | 0.144695008 | 0.965190565  | 0.338484584 | 0.952242043  | 0.345049212 |
| TWISTNB | 1.618429659  | 0.109182096 | -0.174700074 | 0.861927967 | 1.072730072  | 0.287974023 |
| TWSG1   | -0.13967584  | 0.889238263 | -0.980794467 | 0.330796063 | -1.18266804  | 0.241916815 |
| TXK     | 3.847937793  | 0.000226358 | 0.46735919   | 0.642006301 | 0.047376446  | 0.96238105  |
| TXLNA   | -0.630085903 | 0.530286255 | 3.13694125   | 0.002689106 | 2.761364956  | 0.007760113 |
| TXLNB   | 0.322717213  | 0.747682038 | -1.581460545 | 0.119249179 | -2.327132436 | 0.023583614 |
| TXLNG   | 1.270352255  | 0.207338687 | 0.801190927  | 0.426313992 | 1.16484734   | 0.248998253 |
| TXN     | -1.47959293  | 0.142586132 | -0.341624442 | 0.73387683  | -0.014769657 | 0.988268221 |
| TXN2    | -0.178551077 | 0.858704441 | 0.315748984  | 0.753334363 | 0.695198962  | 0.489793325 |
| TXNDC11 | -0.262853026 | 0.793283986 | 1.629897981  | 0.108580479 | 2.160295485  | 0.035026052 |
| TXNDC12 | -1.110303928 | 0.269920817 | -1.038791198 | 0.303243161 | -1.024499469 | 0.309986243 |
| TXNDC15 | 0.350858662  | 0.726540721 | 0.953897368  | 0.344121953 | 1.152747274  | 0.253890555 |

|           |              |             |              |             |              |             |
|-----------|--------------|-------------|--------------|-------------|--------------|-------------|
| TXNDC16   | -0.167768744 | 0.867153746 | -2.562009256 | 0.013046286 | -2.136367681 | 0.037014976 |
| TXNDC17   | 0.07713958   | 0.938689251 | 0.123816236  | 0.901891861 | -0.000210812 | 0.999832542 |
| TXNDC3    | 0.355481091  | 0.723087781 | 0.719681537  | 0.474631355 | 0.185414619  | 0.853570964 |
| TXNDC5    | 0.949094273  | 0.345195995 | -0.73043602  | 0.468084511 | -1.730231126 | 0.089073824 |
| TXNDC6    | 0.714207894  | 0.477006362 | 0.417183262  | 0.67809529  | 0.045821158  | 0.963615121 |
| TXNDC9    | 0.051838971  | 0.958775586 | -0.068287757 | 0.945793088 | 0.190178705  | 0.849853928 |
| TXNIP     | -0.816923945 | 0.416198493 | 0.979773096  | 0.33129575  | -0.596350385 | 0.553334199 |
| TXNL1     | -0.764496644 | 0.446635499 | -0.54885211  | 0.585228431 | -0.139679478 | 0.889412292 |
| TXNL4A    | 0.477820863  | 0.63397349  | 0.166645415  | 0.868232714 | 0.442886625  | 0.65954671  |
| TXNL4B    | -1.453263677 | 0.149740423 | -1.239200232 | 0.220297314 | -0.599495718 | 0.551250126 |
| TXNRD1    | -1.542123727 | 0.12666534  | 0.376274854  | 0.708095093 | -0.320755515 | 0.749584596 |
| TXNRD2    | -0.143961115 | 0.885863399 | 2.37097103   | 0.021108498 | 2.219751578  | 0.030484455 |
| TXNRD3    | 1.764035693  | 0.08122865  | 2.64201245   | 0.010593881 | 2.602747602  | 0.01180269  |
| TYK2      | -0.673422655 | 0.502459668 | -0.664571693 | 0.508976561 | -0.206334612 | 0.837274746 |
| TYMP      | -0.812122621 | 0.418933063 | 0.734293064  | 0.46574908  | -0.838883937 | 0.405086217 |
| TYMS      | 1.012174189  | 0.314255461 | 0.453006017  | 0.652246364 | 0.6652693    | 0.508597599 |
| TYROBP    | -3.053825626 | 0.002996165 | -2.156261971 | 0.03525186  | -2.621862833 | 0.011229964 |
| TYSND1    | 2.51240119   | 0.013831764 | -1.24853455  | 0.216886609 | -1.058048165 | 0.294557177 |
| TYW1      | 2.571088321  | 0.011833322 | 0.929957397  | 0.356274528 | 1.657850556  | 0.102916229 |
| TYW1B     | 1.912645157  | 0.059076323 | 0.455453138  | 0.650495666 | 1.81199579   | 0.075327104 |
| TYW3      | 1.491780251  | 0.139366231 | -0.2083449   | 0.835694693 | -0.038414849 | 0.969492969 |
| TYW5      | 0.800770443  | 0.425441259 | -1.414299284 | 0.162657162 | -1.564225988 | 0.123374826 |
| U2AF1     | -1.751247706 | 0.083420039 | 1.210062463  | 0.231197778 | 1.183197266  | 0.241708763 |
| U2AF1L4   | -0.891870656 | 0.374917052 | -3.349591067 | 0.001432365 | -2.761812033 | 0.007750785 |
| U2AF2     | -0.497532584 | 0.620065993 | -2.157312581 | 0.035166109 | -2.267454872 | 0.027224523 |
| U2SURP    | 1.734710092  | 0.086325967 | 0.825244582  | 0.412637728 | 0.437700151  | 0.663280163 |
| UACA      | 0.435358377  | 0.664378159 | 1.751601709  | 0.085165558 | 1.891154021  | 0.063758676 |
| UAP1      | 1.945254927  | 0.054966612 | 0.50445283   | 0.615867686 | 0.538902894  | 0.592080907 |
| UAP1L1    | 1.654190946  | 0.101684661 | 1.194255608  | 0.237273189 | 1.549463739  | 0.126880059 |
| UBA1      | -1.525064665 | 0.130862281 | 1.640904236  | 0.106267591 | 1.945995722  | 0.056658695 |
| UBA2      | 1.666190423  | 0.09926441  | 0.552147965  | 0.582983259 | 0.628549789  | 0.532188509 |
| UBA3      | 0.569130003  | 0.570731176 | -0.863204147 | 0.391605529 | -1.669162021 | 0.100643661 |
| UBA5      | 3.090395317  | 0.002682997 | 0.484208996  | 0.630073706 | 1.031697081  | 0.306630696 |
| UBA52     | -3.575092279 | 0.000573654 | -0.853584043 | 0.396871592 | -0.44771017  | 0.656082305 |
| UBA6      | 1.294557878  | 0.198890827 | 0.749397222  | 0.456667767 | -0.372065055 | 0.711242788 |
| UBA7      | 0.103519966  | 0.917788047 | 1.964620035  | 0.054288884 | 2.115289611  | 0.038848125 |
| UBAC1     | -1.271341516 | 0.206988319 | 1.781433813  | 0.080114205 | 1.304733039  | 0.197297827 |
| UBAC2     | -0.982641851 | 0.328502657 | 1.866183044  | 0.067110042 | 2.453613046  | 0.017266434 |
| UBAC2-AS1 | 1.560321607  | 0.122306478 | 0.266944872  | 0.790465078 | 0.726569546  | 0.470503228 |
| UBAP1     | -3.484997086 | 0.000772502 | 0.222130078  | 0.824998387 | -0.209908496 | 0.834497716 |
| UBAP2     | -1.175905175 | 0.242833628 | -1.071397112 | 0.288459895 | -0.703833926 | 0.484440383 |
| UBAP2L    | -0.519541117 | 0.604699914 | -0.832521494 | 0.40855341  | -0.875112596 | 0.385234956 |
| UBASH3A   | 2.173908526  | 0.032421901 | 1.655066224  | 0.103350691 | 2.514074858  | 0.01482293  |
| UBASH3B   | 0.586881417  | 0.558799943 | 0.876117285  | 0.38460563  | 0.108510119  | 0.913977296 |
| UBB       | -3.17627325  | 0.002063264 | 0.994601547  | 0.324090327 | 0.45508531   | 0.650799948 |
| UBC       | -1.51920737  | 0.132328363 | 2.728147107  | 0.008429826 | 3.125125501  | 0.002810352 |
| UBE2A     | -0.284184093 | 0.776943118 | -1.800084464 | 0.077084923 | -1.653666767 | 0.103767332 |
| UBE2B     | -2.711104508 | 0.008075827 | -0.600923965 | 0.550248254 | -1.120999344 | 0.267052337 |
| UBE2C     | 0.400062496  | 0.690088962 | 0.50523024   | 0.615325029 | 0.715866391  | 0.477035888 |
| UBE2CBP   | 1.298489952  | 0.197543028 | 0.090807301  | 0.927960779 | 1.380320739  | 0.172950272 |
| UBE2D1    | -1.468456302 | 0.145578966 | -1.293535358 | 0.200989646 | -2.370213697 | 0.021231604 |
| UBE2D2    | 0.360265574  | 0.719519817 | -4.993292618 | 5.83E-06    | -4.101176566 | 0.000133792 |
| UBE2D3    | -2.96111609  | 0.003948338 | -1.306749874 | 0.196491317 | -2.475457887 | 0.016344569 |
| UBE2D4    | 1.215555708  | 0.227435356 | -0.103331497 | 0.91805883  | 1.026733853  | 0.308941912 |
| UBE2E1    | 0.218355251  | 0.827662602 | -2.793918808 | 0.007059253 | -2.337382835 | 0.023003865 |
| UBE2E2    | -0.32729177  | 0.744231731 | -0.867438239 | 0.389301634 | -0.749015158 | 0.456969662 |
| UBE2E3    | -0.720578608 | 0.473096354 | -2.227908764 | 0.029807149 | -1.221377618 | 0.227038696 |
| UBE2F     | -3.451022652 | 0.000863164 | 1.428961145  | 0.158416616 | 1.266730363  | 0.210473048 |
| UBE2G1    | -1.61224289  | 0.110523207 | -1.66649037  | 0.101045578 | -1.587338225 | 0.118043293 |
| UBE2G2    | 1.186588142  | 0.238613323 | -0.795771782 | 0.429432227 | 0.309504364  | 0.7580818   |
| UBE2H     | -3.462234933 | 0.000832188 | 1.790428707  | 0.07864106  | 1.543059539  | 0.12842526  |
| UBE2I     | -1.307690687 | 0.194415876 | -1.197722469 | 0.235930876 | -1.019775982 | 0.312201829 |
| UBE2J1    | 3.675639896  | 0.00040923  | -1.203806733 | 0.233588489 | -0.996301005 | 0.323371595 |
| UBE2J2    | -1.287237821 | 0.20141812  | 0.746924585  | 0.458147404 | 1.141652986  | 0.258436233 |
| UBE2K     | -0.507950575 | 0.612770672 | -1.353646274 | 0.181137609 | -1.429390808 | 0.158423737 |
| UBE2L3    | -1.877070566 | 0.063852612 | 0.195367251  | 0.84579303  | 1.024983068  | 0.30976001  |
| UBE2L6    | -2.708623928 | 0.008131636 | -0.76786276  | 0.445705425 | -2.629719356 | 0.011002005 |
| UBE2M     | -1.538744483 | 0.12748814  | -1.547020475 | 0.127335768 | -2.186481831 | 0.032957342 |
| UBE2N     | 1.332423308  | 0.186193111 | -2.896625264 | 0.005324139 | -2.602947173 | 0.011796575 |
| UBE2O     | -1.347335619 | 0.181363223 | 1.867128782  | 0.066975627 | 1.155703302  | 0.252689077 |
| UBE2Q1    | -0.84474896  | 0.400563072 | 0.05396624   | 0.957148815 | 0.323948244  | 0.747178974 |
| UBE2Q2    | 1.322499789  | 0.189460385 | -1.09682783  | 0.277281341 | -1.475252105 | 0.145721849 |

|           |              |             |              |             |              |             |
|-----------|--------------|-------------|--------------|-------------|--------------|-------------|
| UBE2Q2P1  | 1.503481     | 0.136328731 | -1.345201069 | 0.183832966 | 0.335760599  | 0.738300866 |
| UBE2R2    | -2.490277971 | 0.014660556 | -0.000999852 | 0.999205688 | -0.511336551 | 0.611117291 |
| UBE2S     | -1.180729479 | 0.240921221 | -0.167431176 | 0.867617277 | -0.847805703 | 0.400140176 |
| UBE2T     | 0.203622306  | 0.839123157 | -1.140931576 | 0.258620172 | -1.081338549 | 0.284161838 |
| UBE2V1    | 0.969391945  | 0.335031156 | -3.251414276 | 0.001921294 | -2.827895535 | 0.006480121 |
| UBE2V2    | -0.061532873 | 0.95107567  | -0.894631033 | 0.374707758 | -0.952925529 | 0.344705818 |
| UBE2W     | -0.435749004 | 0.664095777 | -1.018907579 | 0.312507751 | -2.002659045 | 0.050043713 |
| UBE2Z     | -1.051409585 | 0.295975883 | 0.786575604  | 0.434754822 | 0.719650051  | 0.474720726 |
| UBE3A     | 1.711932496  | 0.090464017 | 0.445329855  | 0.657750711 | 0.036617619  | 0.970919568 |
| UBE3B     | 0.011452924  | 0.990888254 | 1.287302946  | 0.203137782 | 0.779718095  | 0.438826072 |
| UBE3C     | 0.173908796  | 0.86234029  | 0.591611646  | 0.556425707 | 0.302742468  | 0.763203138 |
| UBE4A     | 1.169255018  | 0.245487584 | -0.319436621 | 0.750551194 | -1.244585259 | 0.218446181 |
| UBE4B     | -2.30907478  | 0.023303885 | 0.561581109  | 0.57658019  | 0.300675307  | 0.764770907 |
| UBFD1     | 0.962607419  | 0.338406727 | 1.432983199  | 0.157268487 | 1.421964368  | 0.160559271 |
| UBIAD1    | 0.158021787  | 0.874805042 | -0.620322499 | 0.537492273 | 1.132535407  | 0.262215128 |
| UBL3      | -0.282234104 | 0.778432886 | -1.113115505 | 0.270282875 | -2.054492001 | 0.04458594  |
| UBL4A     | -0.287495505 | 0.774415154 | 2.542116363  | 0.01373121  | 1.845243783  | 0.070269587 |
| UBL5      | -0.824664868 | 0.411812325 | -1.336392067 | 0.186676798 | -0.717154359 | 0.476247089 |
| UBL7      | -1.907046835 | 0.05980734  | 0.730361894  | 0.468129459 | 0.478444289  | 0.634188875 |
| UBLCP1    | -0.260490357 | 0.795099772 | -0.047494921 | 0.962283083 | 0.152425538  | 0.879396875 |
| UBN1      | -2.767276361 | 0.006901879 | 0.416672567  | 0.678466717 | 0.492095584  | 0.624567329 |
| UBN2      | 0.909243108  | 0.365728406 | -2.36394784  | 0.021475767 | -2.994688191 | 0.00407903  |
| UBOX5     | -2.056940063 | 0.042680362 | 1.561451841  | 0.123895467 | 2.154752934  | 0.035478232 |
| UBP1      | 2.188135517  | 0.031334124 | -1.687136348 | 0.096986424 | -2.224820406 | 0.030122423 |
| UBQLN1    | 1.027618656  | 0.306971705 | -0.786990583 | 0.434513801 | -2.110894412 | 0.039240202 |
| UBQLN2    | 0.186312627  | 0.852632413 | 0.176811873  | 0.860276442 | -1.136493468 | 0.260569872 |
| UBQLN4    | 0.286221264  | 0.775387635 | 1.019783645  | 0.312095568 | 1.864535331  | 0.067468409 |
| UBQLNL    | -1.353130566 | 0.179512055 | -1.035013388 | 0.304988831 | -0.444980238 | 0.658042091 |
| UBR1      | 0.545612018  | 0.586725878 | 0.315116694  | 0.753811903 | -1.441273461 | 0.155052802 |
| UBR2      | -2.343671727 | 0.021369373 | -0.076537143 | 0.939257011 | -1.452791946 | 0.151838814 |
| UBR3      | -0.243962561 | 0.807832963 | 0.850338285  | 0.398658174 | -0.741054344 | 0.46174376  |
| UBR4      | -0.582046286 | 0.562037531 | 1.099877852  | 0.275961259 | 1.252054137  | 0.215732538 |
| UBR5      | 0.896643185  | 0.372378415 | 1.094294373  | 0.278381199 | -0.999325534 | 0.321917646 |
| UBR7      | 0.104468615  | 0.917037418 | 0.712412895  | 0.479085246 | 0.925526015  | 0.358647107 |
| UBTD1     | 0.144107161  | 0.885748418 | 0.47735239   | 0.634917669 | 0.428524794  | 0.66990602  |
| UBTD2     | 0.576471211  | 0.565781991 | 0.623357491  | 0.535510414 | -0.231504648 | 0.817763061 |
| UBTF      | -1.331917289 | 0.186358684 | 2.110246396  | 0.039191715 | 2.632241051  | 0.010929738 |
| UBXN1     | -0.439280079 | 0.661545398 | 2.520024934  | 0.014529888 | 2.626894506  | 0.011083478 |
| UBXN10    | -2.915970217 | 0.004506959 | -0.379525942 | 0.705693089 | 0.027401598  | 0.978236432 |
| UBXN11    | 0.595136708  | 0.553293616 | 0.408893879  | 0.684133988 | 0.653393631  | 0.516165218 |
| UBXN2A    | -0.901869034 | 0.369611107 | 0.289189132  | 0.773475032 | 0.706248945  | 0.482949124 |
| UBXN2B    | -1.874055377 | 0.064271947 | -2.064284921 | 0.043504568 | -2.674068991 | 0.009792528 |
| UBXN4     | 1.302970029  | 0.196015689 | -0.545820494 | 0.587297232 | -1.676959834 | 0.099101053 |
| UBXN6     | -3.339602601 | 0.001235996 | 0.621732514  | 0.536571059 | 0.19857414   | 0.843312025 |
| UBXN7     | -0.890974853 | 0.375394764 | -0.677267497 | 0.500947624 | -0.674392035 | 0.502825064 |
| UBXN8     | 1.297135744  | 0.198006441 | -0.209289854 | 0.834960456 | -0.429215338 | 0.669406425 |
| UCHL3     | -0.07624222  | 0.93940107  | -1.232077018 | 0.222926538 | -0.559018017 | 0.578368858 |
| UCHL5     | 0.476905493  | 0.634622583 | -0.585382291 | 0.56057732  | -0.967166604 | 0.337601827 |
| UCK1      | -0.773678396 | 0.441213696 | 1.12457209   | 0.265435279 | 1.893223283  | 0.06347768  |
| UCK2      | 1.031499832  | 0.305159332 | 0.969780654  | 0.336210777 | 0.529273158  | 0.5986991   |
| UCKL1     | 1.413146469  | 0.161172785 | -1.418198373 | 0.16152097  | -1.438381231 | 0.155868092 |
| UCKL1-AS1 | 2.034031288  | 0.044987784 | -0.666287599 | 0.507887377 | 0.459856187  | 0.64739241  |
| UCN       | 0.223898879  | 0.823359797 | -0.619217543 | 0.53821475  | -0.571021874 | 0.570259777 |
| UCP2      | -1.511569442 | 0.134259544 | 0.757283757  | 0.451966888 | 1.322601834  | 0.191321358 |
| UCP3      | 1.911377538  | 0.059241182 | -0.831919264 | 0.408890484 | -0.48271141  | 0.631174441 |
| UEVLD     | -0.901216927 | 0.369955713 | -1.517741445 | 0.134549702 | -3.556482264 | 0.00077106  |
| UFC1      | -0.997051757 | 0.321498501 | -1.354067628 | 0.181003923 | -0.55995376  | 0.57773473  |
| UFD1L     | -1.8511036   | 0.067540343 | -1.779083213 | 0.080502947 | -1.286578822 | 0.203512362 |
| UFM1      | 1.053486302  | 0.295028941 | -1.009761938 | 0.316832683 | -0.900748323 | 0.371563477 |
| UFSP1     | 1.282834718  | 0.20294975  | -3.802584822 | 0.000348237 | -3.440078125 | 0.001102787 |
| UFSP2     | 1.161414962  | 0.248642909 | 0.310031374  | 0.757656113 | 2.505293632  | 0.015157223 |
| UGCG      | 1.724337195  | 0.088190738 | -0.741245357 | 0.461556307 | -2.07049967  | 0.04300809  |
| UGDH      | 1.088623019  | 0.279320116 | -0.605713939 | 0.547084313 | -1.240949119 | 0.219776366 |
| UGGT1     | -1.553532344 | 0.123918528 | 1.18703733   | 0.240085738 | 1.818876631  | 0.074256087 |
| UGGT2     | 2.102727094  | 0.038372275 | -0.929935395 | 0.356285823 | -0.43711961  | 0.663698599 |
| UGP2      | -1.931695398 | 0.056645063 | 2.634133637  | 0.010815233 | 2.446581665  | 0.017572974 |
| UGT2B11   | 1.84719234   | 0.068110962 | -0.53896268  | 0.59198984  | -3.059108761 | 0.003397352 |
| UGT8      | 1.649541098  | 0.102635274 | 1.471090069  | 0.146709405 | 1.936759823  | 0.057804862 |
| UHMK1     | 0.829559983  | 0.409053104 | -1.435872798 | 0.156447629 | -1.976137544 | 0.053052298 |
| UHRF1     | 2.293326532  | 0.024234566 | -1.022558516 | 0.310792437 | -0.573225852 | 0.56877697  |
| UHRF1BP1  | 1.277748016  | 0.204729895 | -1.554599893 | 0.125519514 | -1.030766162 | 0.307063296 |
| UHRF1BP1L | -1.827611696 | 0.071028566 | 0.29245781   | 0.770987573 | -1.46308367  | 0.149011407 |

|         |              |             |              |             |              |             |
|---------|--------------|-------------|--------------|-------------|--------------|-------------|
| UHRF2   | 1.539391894  | 0.127330177 | 1.409580662  | 0.164040429 | 1.497308499  | 0.139905035 |
| UIMC1   | -0.91880052  | 0.36073479  | 1.12620925   | 0.2647476   | 0.811199075  | 0.420671401 |
| ULK1    | -1.288920026 | 0.20083523  | -0.801651904 | 0.426049369 | -0.67286855  | 0.50378659  |
| ULK2    | 3.970039634  | 0.000147311 | 0.677178901  | 0.501003413 | 0.027553681  | 0.978115672 |
| ULK3    | 3.101692826  | 0.00259258  | -1.400463796 | 0.166738785 | 0.38748744   | 0.699858075 |
| ULK4    | 2.996399685  | 0.00355706  | 0.374323617  | 0.709538162 | -0.114600972 | 0.909169601 |
| UMPS    | 2.350912335  | 0.020982992 | 1.221603446  | 0.226834141 | 2.355785536  | 0.021994851 |
| UNC119  | -1.275408379 | 0.205552543 | -3.129027127 | 0.002751648 | -2.706683823 | 0.008982084 |
| UNC119B | 1.012824788  | 0.313946318 | 1.498530026  | 0.139456745 | 2.005839244  | 0.049693006 |
| UNC13B  | 0.214585366  | 0.830591696 | 2.271758822  | 0.026853507 | 2.549583535  | 0.013538129 |
| UNC13D  | -1.640454309 | 0.104513729 | 0.5219147    | 0.603731167 | 0.494895646  | 0.622601846 |
| UNC45A  | -0.211853297 | 0.832715937 | 3.113663725  | 0.00287697  | 3.288397122  | 0.00174108  |
| UNC45B  | -0.339511784 | 0.735040675 | -0.831869907 | 0.408918117 | -0.713715888 | 0.47835457  |
| UNC50   | 1.185614426  | 0.238995794 | -1.465592309 | 0.14819752  | -0.83298957  | 0.408374426 |
| UNC5A   | 0.438320798  | 0.662237861 | -0.892036352 | 0.376085118 | -2.016243345 | 0.04856041  |
| UNC5B   | -0.884134714 | 0.37905506  | 1.803952643  | 0.076468787 | 0.688846866  | 0.493751858 |
| UNC5CL  | 1.518405158  | 0.132530161 | -1.572898586 | 0.121219944 | -0.644113989 | 0.522120027 |
| UNC93B1 | -0.987718768 | 0.326023542 | -1.873897996 | 0.066020167 | -3.389857991 | 0.001284366 |
| UNG     | 2.174631165  | 0.032365866 | 0.531556926  | 0.597077137 | 1.569228004  | 0.122204879 |
| UNK     | 0.863108747  | 0.390445687 | -3.272345928 | 0.00180542  | -2.708667526 | 0.008934833 |
| UNKL    | 2.175200122  | 0.032321807 | -1.794531524 | 0.077976667 | -1.991931326 | 0.051242504 |
| UPB1    | 0.95394281   | 0.342749898 | 1.16343635   | 0.24944978  | 1.03098864   | 0.306959873 |
| UPF1    | -1.541652584 | 0.126779804 | -0.566342259 | 0.573361371 | -0.62425252  | 0.534986269 |
| UPF2    | -1.707908052 | 0.091211758 | 1.316950404  | 0.193071046 | 0.899337132  | 0.372307932 |
| UPF3A   | 1.171981106  | 0.24439716  | 0.600238291  | 0.550701921 | 0.516185565  | 0.60774858  |
| UPF3B   | 2.659263971  | 0.009317699 | -0.92850185  | 0.357022253 | -1.149961233 | 0.255026675 |
| UPK3A   | -1.187489006 | 0.238259858 | -0.12254706  | 0.90289238  | 0.594969654  | 0.554250311 |
| UPK3B   | 0.434686423  | 0.664864022 | -1.103898953 | 0.274227616 | 1.020153681  | 0.312024274 |
| UPP1    | 0.198572624  | 0.843059367 | 2.151382466  | 0.035652531 | 1.656992194  | 0.103090378 |
| UPRT    | -0.948678068 | 0.345406498 | -0.195561185 | 0.845641928 | -1.655089128 | 0.103477341 |
| UQCC    | 3.821526381  | 0.000248133 | 0.806264383  | 0.42340699  | 2.106697853  | 0.039617773 |
| UQCR10  | -1.289684831 | 0.200570637 | -4.744741095 | 1.42E-05    | -3.217531332 | 0.002146821 |
| UQCR11  | -0.824505279 | 0.411902469 | -1.500315204 | 0.138994891 | -1.058426032 | 0.294386459 |
| UQCRB   | 0.025098506  | 0.980033747 | -0.658528021 | 0.512822807 | -0.340066025 | 0.735073747 |
| UQCRC1  | -0.909251341 | 0.365724085 | 2.267029998  | 0.027159053 | 3.017725855  | 0.0038218   |
| UQCRC2  | -0.010775462 | 0.991427209 | -0.006186406 | 0.995085372 | 1.28190611   | 0.205135356 |
| UQCRF51 | -0.142685934 | 0.88686745  | 2.466469626  | 0.016643276 | 2.293283327  | 0.025591617 |
| UQCRH   | 0.16409405   | 0.87003691  | -1.514534539 | 0.135359163 | -0.489128062 | 0.626653357 |
| UQCRQ   | -0.081471781 | 0.935253499 | -1.746811637 | 0.086000765 | -1.040833301 | 0.302407077 |
| URB1    | 2.020697982  | 0.046379395 | 1.469095775  | 0.147247853 | 1.634934271  | 0.107648742 |
| URB2    | 1.908210721  | 0.059654737 | 2.265798698  | 0.027239116 | 2.406121718  | 0.01943394  |
| URGCP   | 1.231882653  | 0.221304943 | 2.92544785   | 0.004913615 | 3.567847692  | 0.000744339 |
| URM1    | -0.338266918 | 0.73597524  | 0.549832825  | 0.584559926 | 1.410199476  | 0.163987997 |
| UROD    | 0.697642658  | 0.487256965 | 0.880139781  | 0.382441271 | 1.660241046  | 0.102832498 |
| UROS    | 0.65224356   | 0.515959946 | 0.739105993  | 0.4628442   | 1.734546482  | 0.088299656 |
| USE1    | -0.812729465 | 0.418586845 | 1.41229256   | 0.163244327 | 2.070146047  | 0.043042415 |
| USF1    | -2.321484743 | 0.02259287  | 1.034981599  | 0.305003549 | 0.500197201  | 0.618888022 |
| USF2    | -0.918577468 | 0.360850834 | -2.982553099 | 0.004185635 | -3.288872371 | 0.001738621 |
| USMG5   | -0.249071294 | 0.803891433 | -1.02491423  | 0.309689046 | -0.515437593 | 0.608267656 |
| USO1    | 0.713715699  | 0.477309193 | -0.204338911 | 0.838809004 | -1.104852943 | 0.273928013 |
| USP1    | 0.290982114  | 0.77175607  | 0.770856202  | 0.443942924 | 0.077446685  | 0.938543096 |
| USP10   | -4.503017933 | 2.06E-05    | 0.006293439  | 0.995000343 | -0.211334086 | 0.833390573 |
| USP11   | 0.12341922   | 0.902059205 | 0.92852498   | 0.357010363 | 1.44129371   | 0.155047106 |
| USP12   | -1.004804374 | 0.317771563 | -1.455988444 | 0.150825418 | -2.267449108 | 0.027224897 |
| USP13   | 1.120651503  | 0.265513518 | 0.516354732  | 0.60758354  | 1.254257693  | 0.21493671  |
| USP14   | 2.018958955  | 0.046563589 | 1.27475367   | 0.207515133 | 1.42305422   | 0.160244484 |
| USP15   | -0.36334147  | 0.717229282 | -0.00943449  | 0.992505081 | -0.915745546 | 0.363710555 |
| USP16   | 1.870652969  | 0.064747909 | -0.464170737 | 0.64427512  | 0.014815054  | 0.988232165 |
| USP18   | -1.730660436 | 0.087050096 | 1.107361834  | 0.272740773 | -0.157783037 | 0.294677002 |
| USP19   | -1.312096597 | 0.192931541 | 1.207549789  | 0.232155878 | 0.91254858   | 0.365375566 |
| USP20   | 0.319209704  | 0.750331027 | -0.193235029 | 0.84745472  | 0.691624821  | 0.492018517 |
| USP21   | -0.231152296 | 0.81773807  | 1.50844558   | 0.136906708 | 2.106604706  | 0.03962619  |
| USP22   | -1.70527778  | 0.091703188 | 1.656269183  | 0.10310596  | 1.269976423  | 0.209322735 |
| USP24   | 1.79326335   | 0.076398221 | 0.489074427  | 0.626646299 | 0.516801861  | 0.607321035 |
| USP25   | -1.249490497 | 0.21482957  | -0.494161466 | 0.623071609 | -2.591613938 | 0.012148408 |
| USP27X  | 0.814232478  | 0.417730082 | 0.258190622  | 0.797180161 | 0.815838402  | 0.418034753 |
| USP28   | 0.001071425  | 0.999147574 | -1.724684492 | 0.089947491 | -1.240538917 | 0.219926802 |
| USP3    | -1.698624132 | 0.092955997 | -1.354980809 | 0.180714449 | -2.079149435 | 0.042175835 |
| USP30   | 0.367067167  | 0.714458321 | -1.898617606 | 0.062628382 | -0.334566941 | 0.73919641  |
| USP31   | -2.503143982 | 0.014173303 | -0.586762508 | 0.559656135 | -0.719658168 | 0.474715766 |
| USP32   | -2.276809989 | 0.025245715 | -0.33822641  | 0.736422376 | -2.022290133 | 0.047912435 |
| USP33   | 0.627460859  | 0.531997028 | 0.555557599  | 0.580664928 | -1.115702806 | 0.269294222 |



|        |              |             |              |             |              |             |
|--------|--------------|-------------|--------------|-------------|--------------|-------------|
| USP34  | 0.909040099  | 0.365834949 | -0.242537597 | 0.809225226 | -0.024608403 | 0.98045443  |
| USP35  | 0.632638273  | 0.528625574 | -2.185444031 | 0.032936976 | -1.943662779 | 0.056946363 |
| USP36  | 2.508056542  | 0.013991126 | 0.347101053  | 0.729780492 | 0.561389655  | 0.576762317 |
| USP37  | 0.530740071  | 0.596948229 | -0.558285393 | 0.5788134   | -0.231516626 | 0.817753801 |
| USP38  | -0.159320414 | 0.873784924 | 0.431053678  | 0.668038352 | -1.364811281 | 0.177748336 |
| USP39  | -0.947866538 | 0.345817182 | 0.029982497  | 0.976184664 | 0.427888364  | 0.670386596 |
| USP4   | -2.188075895 | 0.031338616 | 0.473512525  | 0.637637446 | 0.450751611  | 0.653901748 |
| USP40  | 2.561188444  | 0.012151024 | 0.405333063  | 0.686734399 | 2.980932703  | 0.004240218 |
| USP42  | 0.226722789  | 0.821170025 | -2.429731848 | 0.018249191 | -3.026627894 | 0.00372652  |
| USP43  | 0.208779387  | 0.835107451 | -1.891984961 | 0.063523613 | -1.376586212 | 0.174096413 |
| USP44  | 1.253312221  | 0.213442645 | 0.05574854   | 0.955735069 | 0.191434728  | 0.848874521 |
| USP45  | 2.46990767   | 0.015462769 | -1.012268893 | 0.315643165 | -1.172674581 | 0.245869806 |
| USP46  | 2.272361112  | 0.02552435  | 1.377873529  | 0.173572354 | 0.45735411   | 0.649178546 |
| USP47  | 1.243006102  | 0.217197889 | 1.808884379  | 0.075689224 | 1.543154061  | 0.128402345 |
| USP48  | 1.286249332  | 0.20176122  | 2.886590156  | 0.005474377 | 2.773274972  | 0.007515106 |
| USP49  | -0.445766997 | 0.656870525 | -0.639411817 | 0.525090123 | -2.545771031 | 0.013671066 |
| USP5   | -0.272994657 | 0.785502885 | 2.305265862  | 0.024774399 | 2.820467694  | 0.006612686 |
| USP51  | 1.12224191   | 0.264840619 | 0.791714111  | 0.431775935 | 0.88436454   | 0.380264901 |
| USP53  | 2.141205592  | 0.035047826 | -0.785788787 | 0.435212028 | -1.470105166 | 0.147106216 |
| USP54  | 2.769766586  | 0.00685364  | -0.724261333 | 0.471837091 | 0.52892814   | 0.598936857 |
| USP6   | -1.177928691 | 0.242030166 | 0.278325455  | 0.781759307 | -1.433696199 | 0.157195837 |
| USP6NL | -1.095300738 | 0.276401305 | -1.147430281 | 0.255947743 | -1.901460041 | 0.06236956  |
| USP7   | -1.253759788 | 0.213280652 | 1.583162856  | 0.118860433 | 1.66213526   | 0.102050513 |
| USP8   | 0.185670262  | 0.853134618 | 0.146066193  | 0.884379154 | -0.506694512 | 0.614350151 |
| USP9X  | -1.362388562 | 0.176584334 | -0.097683732 | 0.922522578 | -0.358512777 | 0.721301986 |
| USPL1  | 0.471607301  | 0.638385157 | -1.600073774 | 0.115053728 | -1.85126849  | 0.069384446 |
| UST    | 0.648971659  | 0.518062511 | -2.4754128   | 0.016272134 | -0.697852947 | 0.488144609 |
| UTF1   | -0.785518529 | 0.434279064 | -1.267105672 | 0.210217076 | -1.946484064 | 0.056598637 |
| UTP11L | -0.043750723 | 0.96520315  | -0.657903515 | 0.513221133 | 1.67783376   | 0.098929382 |
| UTP14A | 0.41732107   | 0.677469395 | 3.031829195  | 0.003639489 | 3.89385963   | 0.000264284 |
| UTP14C | 0.490321104  | 0.625138348 | 0.055807065  | 0.955688649 | -0.465729894 | 0.643207596 |
| UTP15  | 0.786610196  | 0.433642927 | -1.676584228 | 0.099044019 | -1.023715328 | 0.31035331  |
| UTP18  | 3.464364665  | 0.000826424 | 2.24604152   | 0.028552658 | 2.509809378  | 0.014984471 |
| UTP20  | 1.539967337  | 0.127189904 | 1.701456125  | 0.094250391 | 2.311513264  | 0.024492057 |
| UTP23  | 0.042222244  | 0.966418071 | -0.55436574  | 0.581474812 | -1.837427089 | 0.071432164 |
| UTP3   | 0.423335104  | 0.673093219 | 2.004158208  | 0.049763358 | 2.146641542  | 0.036149202 |
| UTP6   | 1.197014834  | 0.234545287 | 1.295089131  | 0.200456763 | 1.794703171  | 0.078076013 |
| UTRN   | 1.494438636  | 0.138671506 | -1.690232282 | 0.096389436 | -2.518618675 | 0.014652583 |
| UTS2   | -0.449950984 | 0.653862503 | -1.044541056 | 0.300599341 | -0.40013852  | 0.690570424 |
| UTS2D  | 0.521647244  | 0.603238593 | -0.843205657 | 0.402601653 | 0.842800972  | 0.402910088 |
| UVRAG  | -0.088349105 | 0.929801824 | 0.684408665  | 0.49646193  | 0.50763026   | 0.613697845 |
| UXS1   | 0.924977105  | 0.357530871 | 1.788755879  | 0.078913304 | 2.864018734  | 0.005869732 |
| UXT    | -0.703953126 | 0.483337826 | 0.934654696  | 0.353868407 | 1.804782483  | 0.076463742 |
| VAC14  | 0.589222238  | 0.557235855 | 1.22244803   | 0.226517188 | 1.953239668  | 0.055773369 |
| VAMP1  | 2.41065894   | 0.018024021 | -1.28699589  | 0.203244057 | -0.501144597 | 0.18225404  |
| VAMP2  | -1.348571301 | 0.180967286 | -2.667506732 | 0.009905665 | -1.398260801 | 0.167525005 |
| VAMP3  | -2.383043042 | 0.019342119 | -1.48600473  | 0.142731403 | -1.269373767 | 0.209535946 |
| VAMP4  | 1.706685259  | 0.091439951 | -0.890154766 | 0.377085942 | -1.276474165 | 0.207034179 |
| VAMP5  | -2.92581591  | 0.004380978 | 0.333314919  | 0.740106938 | -0.470880514 | 0.63954749  |
| VAMP7  | -0.734303469 | 0.464734037 | -0.130012213 | 0.897009764 | -0.48891176  | 0.626805527 |
| VAMP8  | 0.232214056  | 0.81691595  | 0.114819958  | 0.908987176 | 0.725914902  | 0.470901328 |
| VANGL1 | -0.103495381 | 0.917807501 | -0.006718425 | 0.994662729 | 0.178868482  | 0.858683824 |
| VAPA   | 0.268249408  | 0.789140986 | -0.856608522 | 0.39521128  | -0.91808189  | 0.362496851 |
| VAPB   | -0.366481848 | 0.714893396 | 1.32883541   | 0.189142804 | 0.938196878  | 0.352155297 |
| VARS   | -0.348304427 | 0.72845116  | 1.930249352  | 0.058504871 | 2.147784116  | 0.036054022 |
| VARS2  | 1.030814882  | 0.305478653 | 0.523184922  | 0.602852642 | 1.730503422  | 0.08902481  |
| VASH1  | 1.174250073  | 0.243492223 | 0.380604256  | 0.70489706  | 0.824115565  | 0.413355526 |
| VASH2  | 0.267050837  | 0.790060654 | 0.37638608   | 0.708026182 | -0.944243256 | 0.349084575 |
| VASN   | 1.915209721  | 0.058743976 | -1.380244477 | 0.172845206 | -0.779746621 | 0.438809415 |
| VASP   | -2.34630146  | 0.02122832  | -0.196815069 | 0.844665113 | -0.47405434  | 0.637296595 |
| VAT1   | -0.733722312 | 0.465086421 | 2.800242883  | 0.006938913 | 2.709756442  | 0.008908992 |
| VAV1   | -2.120954988 | 0.036764872 | 0.861168641  | 0.392716125 | 0.837700227  | 0.405745249 |
| VAV2   | 0.252762689  | 0.801046567 | 1.550136422  | 0.12658657  | 1.681024927  | 0.098304589 |
| VAV3   | -0.868921645 | 0.387275628 | -0.764154687 | 0.447894354 | -1.303967482 | 0.197556979 |
| VBP1   | 0.120629562  | 0.904262007 | 0.043248303  | 0.965653186 | 0.179707039  | 0.858028525 |
| VCAN   | 0.127478471  | 0.898855266 | 2.234913683  | 0.02931687  | 1.212537621  | 0.230375936 |
| VCL    | -1.060409141 | 0.291887188 | 0.362504533  | 0.718301854 | 0.103778815  | 0.917714099 |
| VCP    | -1.516787824 | 0.13293774  | 2.456370683  | 0.017071538 | 2.29213901   | 0.025662079 |
| VCPPI1 | -0.03670054  | 0.970807676 | -0.478676889 | 0.633980695 | -2.081980124 | 0.04190653  |
| VDAC1  | -0.640282297 | 0.523668207 | 1.719133249  | 0.090960784 | 2.174019957  | 0.033928044 |
| VDAC2  | -0.089850031 | 0.928612472 | 3.633851134  | 0.000596168 | 4.904085589  | 8.37E-06    |
| VDAC3  | 1.111834183  | 0.269265845 | 2.107820438  | 0.039409682 | 2.778122556  | 0.007417438 |

|          |              |             |              |             |              |             |
|----------|--------------|-------------|--------------|-------------|--------------|-------------|
| VDR      | -3.519972296 | 0.000688609 | 0.835181791  | 0.407066451 | 0.118020576  | 0.906471889 |
| VEGFA    | -0.062144695 | 0.950589845 | -1.202354941 | 0.234145873 | -1.240692217 | 0.219870573 |
| VEGFB    | 0.792724104  | 0.430090375 | 1.38584076   | 0.171138147 | 2.225834636  | 0.030050441 |
| VENTX    | 1.677438632  | 0.097038352 | 0.379333315  | 0.705835324 | 0.962632199  | 0.339853207 |
| VEPH1    | -1.100651339 | 0.27407789  | 1.956255047  | 0.055290257 | 1.88370251   | 0.064779309 |
| VEZF1    | -0.797362003 | 0.427406977 | -1.19604401  | 0.236580058 | -2.478523864 | 0.016218798 |
| VEZT     | 1.23056978   | 0.221793399 | -0.58501949  | 0.560819585 | -1.071005246 | 0.288742086 |
| VGLL4    | 0.220415026  | 0.826063241 | 0.286759678  | 0.775325393 | 0.109978318  | 0.912818099 |
| VHL      | -2.443682291 | 0.016553326 | 1.139133935  | 0.259362898 | 2.403685253  | 0.019551456 |
| VIL1     | -2.893761641 | 0.004807708 | 1.787573527  | 0.079106199 | 1.52402906   | 0.133105665 |
| VILL     | 1.045161724  | 0.298837253 | 0.305555154  | 0.761044979 | 0.993230699  | 0.32485204  |
| VIM      | -1.677665876 | 0.096993801 | 2.218012364  | 0.030512129 | 2.600918086  | 0.011858877 |
| VIPAR    | 0.117679131  | 0.906592576 | 1.832301973  | 0.072077871 | 1.991999973  | 0.051234755 |
| VIPR1    | 0.434561831  | 0.664954125 | 0.151855052  | 0.87983193  | 1.105865592  | 0.273493175 |
| VIPR2    | 0.937227621  | 0.351230385 | -1.257806275 | 0.213537529 | -0.740241806 | 0.462232642 |
| VIT      | -0.389703715 | 0.697705957 | -2.813631723 | 0.006690355 | -2.881882475 | 0.005587957 |
| VKORC1   | -0.875895569 | 0.38349354  | -0.269907072 | 0.788196458 | 0.438091036  | 0.662998486 |
| VKORC1L1 | -1.127927402 | 0.262444871 | -3.100262329 | 0.002990632 | -4.896950153 | 8.59E-06    |
| VLDLR    | 0.151706358  | 0.879769023 | -1.023263201 | 0.310462091 | -1.158359019 | 0.251613134 |
| VMA21    | 0.763516039  | 0.447216815 | -0.569878912 | 0.570976058 | -0.397980577 | 0.692151321 |
| VMAC     | 3.189910022  | 0.001978124 | -1.09011306  | 0.280203103 | 0.058705673  | 0.953394651 |
| VMO1     | -0.706379458 | 0.48183559  | -0.944748868 | 0.348733563 | -0.734487548 | 0.465703301 |
| VMP1     | -1.931088777 | 0.056721156 | -2.189423857 | 0.032631851 | -2.545798391 | 0.013670108 |
| VN1R1    | 0.203076677  | 0.839548278 | -0.652292486 | 0.516807389 | 0.689086006  | 0.493602512 |
| VNN1     | -0.658235239 | 0.512121324 | 0.721238123  | 0.473680593 | -0.41047338  | 0.683018463 |
| VNN2     | -1.471996466 | 0.14462233  | -0.091150362 | 0.927689386 | -0.395083557 | 0.69427583  |
| VNN3     | -3.661028929 | 0.000429972 | -0.406371756 | 0.685975462 | -0.602202488 | 0.54945982  |
| VOPP1    | -0.136189161 | 0.891985704 | 1.82474513   | 0.073227095 | 2.113524008  | 0.039005215 |
| VPRBP    | 3.047515491  | 0.003053519 | 1.249767073  | 0.216439182 | 1.631259514  | 0.108423842 |
| VPREB3   | -2.843358021 | 0.005560018 | 0.60526283   | 0.547381891 | 0.058684137  | 0.953411728 |
| VPS11    | -0.589521301 | 0.557036183 | -0.076897664 | 0.938971459 | 0.641152782  | 0.524027859 |
| VPS13A   | 1.356471835  | 0.178451217 | -1.101850604 | 0.275109778 | -2.319086534 | 0.024047762 |
| VPS13B   | 0.083030707  | 0.934017453 | -1.17897146  | 0.243256981 | -1.264209131 | 0.211369737 |
| VPS13C   | 0.938424888  | 0.350618489 | -0.308572499 | 0.75876008  | -1.89708925  | 0.062955515 |
| VPS13D   | 1.256615432  | 0.212249198 | 0.728506417  | 0.469255375 | 0.976933582  | 0.632785924 |
| VPS16    | -0.2099025   | 0.834233484 | -0.143985029 | 0.8860149   | 0.601825889  | 0.549708733 |
| VPS18    | -1.408344965 | 0.162584876 | 1.985682047  | 0.051836082 | 1.882899923  | 0.064890061 |
| VPS24    | 0.621341704  | 0.53599597  | -2.35483201  | 0.021960976 | -3.466319851 | 0.001017879 |
| VPS25    | -0.046164822 | 0.963284455 | -2.426804902 | 0.018382938 | -0.869678262 | 0.388173146 |
| VPS26A   | -0.02393779  | 0.980956932 | -0.764363453 | 0.447770949 | -0.563987417 | 0.575005082 |
| VPS26B   | -1.856848523 | 0.066709466 | 1.582325615  | 0.119051501 | 1.611594669  | 0.112649035 |
| VPS28    | -1.595806178 | 0.114150561 | -0.182009125 | 0.856214633 | 0.242812899  | 0.809033779 |
| VPS29    | 1.202420559  | 0.232455989 | 0.078427177  | 0.937760091 | -0.05038354  | 0.959995281 |
| VPS33A   | -0.716329227 | 0.475702405 | 3.676868189  | 0.000520419 | 3.308176378  | 0.001641467 |
| VPS33B   | 1.689082227  | 0.09477699  | 1.903826498  | 0.061932846 | 3.101173672  | 0.003011373 |
| VPS35    | -0.625046985 | 0.533572686 | 2.231889257  | 0.029527672 | 1.996725286  | 0.050703775 |
| VPS36    | 1.845194999  | 0.06840391  | -0.867178056 | 0.389442963 | -1.263031714 | 0.211789461 |
| VPS37A   | -0.246682735 | 0.805733648 | -0.989545825 | 0.326535142 | -1.597537919 | 0.115750201 |
| VPS37B   | -1.571908608 | 0.119593801 | -0.065684411 | 0.947856546 | 1.372765015  | 0.175275175 |
| VPS37C   | -1.132861116 | 0.260378281 | -1.00028595  | 0.321356146 | -0.681989374 | 0.49804501  |
| VPS39    | -0.935844333 | 0.35193821  | 1.609188925  | 0.113043053 | 2.165647503  | 0.034594219 |
| VPS41    | -1.513416977 | 0.13379039  | 0.027420369  | 0.97821924  | 0.493627001  | 0.623492021 |
| VPS45    | 1.439505947  | 0.153587959 | 1.809754751  | 0.075552337 | 2.617990214  | 0.011343906 |
| VPS4A    | 0.030695834  | 0.97558227  | 1.616948521  | 0.11135387  | 2.42984311   | 0.018322504 |
| VPS4B    | -0.915643169 | 0.362379628 | -0.156996286 | 0.875796825 | -1.414914723 | 0.162607056 |
| VPS52    | 0.728730488  | 0.468119432 | -0.295810907 | 0.76843838  | 1.855993594  | 0.068696836 |
| VPS53    | -0.183979297 | 0.854456911 | 2.388183919  | 0.020232011 | 2.618515774  | 0.011328381 |
| VPS54    | 0.435819789  | 0.664044612 | 0.048249261  | 0.961684512 | -0.418709823 | 0.677023068 |
| VPS72    | -0.516301686 | 0.606950718 | -1.049040109 | 0.298541672 | 0.134162452  | 0.893753108 |
| VPS8     | -1.671397277 | 0.098228856 | 0.071464924  | 0.943275316 | -0.493406847 | 0.623646555 |
| VRK1     | 1.127312462  | 0.262703257 | -0.289039747 | 0.773588771 | 0.863785142  | 0.391375187 |
| VRK2     | -0.457211551 | 0.648656187 | 0.132564896  | 0.89499954  | -1.177750881 | 0.243856061 |
| VRK3     | -2.475774237 | 0.015227798 | 2.18313177   | 0.033115401 | 2.193305453  | 0.032436235 |
| VSIG1    | 1.037345434  | 0.302443295 | -0.133049294 | 0.894618156 | 1.315389704  | 0.193716889 |
| VSIG10   | -0.645339865 | 0.520401614 | 1.689706634  | 0.096490583 | 1.357490226  | 0.180048268 |
| VSIG10L  | -0.414483108 | 0.679538332 | 1.148891684  | 0.255349499 | -0.623464498 | 0.535499939 |
| VSIG2    | -3.113887365 | 0.002498169 | -0.0360314   | 0.97138191  | -0.330833838 | 0.741999519 |
| VSIG4    | -2.566614815 | 0.011975944 | 0.892096898  | 0.376052941 | -0.138116302 | 0.890641864 |
| VSIG8    | -1.798241043 | 0.075599793 | -0.803261383 | 0.425126217 | -1.235641326 | 0.221728784 |
| VSTM1    | -1.089749759 | 0.278826132 | 0.023119524  | 0.981634843 | 0.125000578  | 0.900968864 |
| VSTM4    | -1.428204089 | 0.15680552  | 0.81358401   | 0.419234013 | -0.095394185 | 0.924340847 |
| VTA1     | -0.266506741 | 0.790478239 | -1.307140672 | 0.196359448 | -1.541874149 | 0.12871291  |

|         |              |             |              |             |              |             |
|---------|--------------|-------------|--------------|-------------|--------------|-------------|
| VTI1A   | -0.39889523  | 0.690945696 | -1.272243978 | 0.208398912 | 0.11442084   | 0.909311736 |
| VTI1B   | -2.759329407 | 0.007057905 | -0.908266263 | 0.36752234  | -0.454544048 | 0.651187013 |
| VTN     | 0.194560083  | 0.84618998  | -0.175157428 | 0.861570242 | -1.22691791  | 0.22496527  |
| VWA5A   | -0.449061441 | 0.654501551 | 1.463656349  | 0.148724347 | 2.167539711  | 0.034442666 |
| VWCE    | -2.497981404 | 0.014367044 | 2.264506497  | 0.027323363 | 0.365147022  | 0.716371391 |
| VWDE    | -0.116754437 | 0.907323169 | 2.388521117  | 0.020215171 | 2.723373098  | 0.008591596 |
| VWVF    | -2.698642522 | 0.008359767 | 1.172005489  | 0.246019998 | 1.28340732   | 0.204612884 |
| WAC     | -1.058837233 | 0.292598544 | -1.612722903 | 0.11227119  | -2.371524134 | 0.02116347  |
| WAPAL   | -0.087966058 | 0.930105381 | -0.263618338 | 0.793014898 | -1.446983069 | 0.153453087 |
| WARS    | -2.73171528  | 0.00762544  | -0.326588988 | 0.745162606 | -0.327674603 | 0.744374474 |
| WARS2   | 1.717463572  | 0.089444537 | -0.398657028 | 0.691620053 | -0.193434366 | 0.84731576  |
| WAS     | -2.163837508 | 0.033211677 | -1.165828778 | 0.248488782 | -1.574549455 | 0.12097001  |
| WASF1   | 1.859048332  | 0.066393587 | 1.481446191  | 0.143938129 | 1.429177404  | 0.158484794 |
| WASF2   | -1.737680764 | 0.085797927 | -0.315675383 | 0.753389946 | 0.062778655  | 0.950165366 |
| WASF3   | -3.291815535 | 0.001438391 | 0.588185037  | 0.558707499 | -0.923164362 | 0.359865572 |
| WASH1   | 0.331486987  | 0.74107212  | -1.473823409 | 0.145973933 | 0.683614801  | 0.497025566 |
| WASH2P  | 0.535910409  | 0.593385012 | -0.212366452 | 0.832570939 | 0.781977723  | 0.437507761 |
| WASH3P  | 0.471775368  | 0.638265655 | 0.652036077  | 0.516971589 | 0.602483377  | 0.549274203 |
| WASH7P  | 0.044776369  | 0.964387953 | 0.921083674  | 0.360848768 | 0.751458037  | 0.455510398 |
| WASL    | 0.557863399  | 0.578367278 | -0.67283718  | 0.503741549 | -0.983071306 | 0.329782952 |
| WBP1    | -0.562012028 | 0.575549806 | -1.717910873 | 0.091185171 | -1.858881266 | 0.068279451 |
| WBP11   | -1.354876938 | 0.178956997 | 0.176018871  | 0.860896533 | 0.526291123  | 0.600755517 |
| WBP2    | -3.013002207 | 0.003385645 | -0.873878339 | 0.38581365  | -1.47243822  | 0.146477423 |
| WBP2NL  | 0.906727932  | 0.367049812 | -0.331684889 | 0.741331131 | -1.857568141 | 0.068468984 |
| WBP4    | -0.574073581 | 0.567396082 | 0.660305766  | 0.511689823 | -0.392633998 | 0.696074124 |
| WBSCR16 | -0.468020935 | 0.640937451 | 2.759667924  | 0.00774507  | 2.829840663  | 0.006445814 |
| WBSCR22 | 1.064984458  | 0.289823394 | 1.983347407  | 0.052103193 | 3.017369168  | 0.003825665 |
| WBSCR27 | 0.616100613  | 0.539433286 | 0.23797923   | 0.812741786 | 0.583367029  | 0.561978606 |
| WDFY1   | -0.871897087 | 0.385659168 | -0.395036081 | 0.694275471 | -1.919858593 | 0.05995356  |
| WDFY2   | 3.804896571  | 0.000262854 | -1.145975922 | 0.256544095 | -1.908931057 | 0.06137871  |
| WDFY3   | -0.685079066 | 0.495111338 | -0.565838905 | 0.573701254 | -1.789132644 | 0.078979195 |
| WDFY4   | -1.315663129 | 0.191736207 | 1.264829181  | 0.211026356 | 1.256845162  | 0.214005004 |
| WDHD1   | 1.642456608  | 0.104097438 | -0.904042177 | 0.369738852 | -0.979049841 | 0.331748471 |
| WDPCP   | 1.443548747  | 0.152449483 | -0.206181445 | 0.837376268 | -0.475275037 | 0.636431781 |
| WDR1    | -1.489884623 | 0.139863285 | 0.414438863  | 0.680092222 | 0.463647527  | 0.64468989  |
| WDR11   | 2.605047438  | 0.010799669 | 2.940122569  | 0.004716074 | 1.639053505  | 0.106785253 |
| WDR12   | 2.155416846  | 0.033884834 | 0.467656356  | 0.641795019 | 0.912940102  | 0.365171396 |
| WDR13   | -1.378719756 | 0.171508273 | -0.980901848 | 0.330743558 | -0.759291413 | 0.450849301 |
| WDR17   | 0.258684474  | 0.796488412 | -0.869971581 | 0.387927223 | -1.918750338 | 0.060096801 |
| WDR18   | 0.137821394  | 0.890699367 | -0.517605967 | 0.606715607 | 0.81552477   | 0.418212682 |
| WDR19   | 3.143433443  | 0.002282528 | 0.468469894  | 0.641216756 | 1.311864597  | 0.19489596  |
| WDR20   | -1.406799146 | 0.163041507 | -5.04541738  | 4.83E-06    | -5.93046851  | 1.95E-07    |
| WDR24   | 1.385043419  | 0.169572869 | 0.276629646  | 0.783054797 | 0.824514321  | 0.513130909 |
| WDR25   | -1.281588125 | 0.203384944 | 0.60323397   | 0.548721263 | 0.665713249  | 0.408315861 |
| WDR26   | 0.163253297  | 0.870696813 | -1.104138724 | 0.274124484 | -2.00702643  | 0.049562629 |
| WDR27   | 2.611490694  | 0.010613021 | -0.831811881 | 0.408950605 | -0.710316048 | 0.480443511 |
| WDR3    | 2.177516574  | 0.032142965 | 2.146919788  | 0.036022459 | 1.971574163  | 0.053585317 |
| WDR33   | 1.533237453  | 0.128838083 | 0.820772033  | 0.415160316 | 1.580535072  | 0.119593019 |
| WDR34   | 0.382712158  | 0.702864602 | 1.53435979   | 0.130416379 | 1.954435766  | 0.055628331 |
| WDR35   | 0.972049496  | 0.333714954 | -0.368214163 | 0.714063405 | -0.417643922 | 0.677797776 |
| WDR36   | 1.478567808  | 0.142859597 | -0.892706885 | 0.375728865 | -1.305387324 | 0.197076545 |
| WDR37   | 2.539908834  | 0.012860081 | 1.492747484  | 0.140961105 | 2.167993145  | 0.034406435 |
| WDR4    | 1.028179405  | 0.306709407 | 0.295301366  | 0.768825594 | -0.748132612 | 0.457497518 |
| WDR41   | 0.539976944  | 0.590589478 | 0.844319067  | 0.401984497 | 0.248673174  | 0.80451951  |
| WDR43   | 1.884987454  | 0.062762505 | 0.421544496  | 0.67492666  | 0.381647556  | 0.704161069 |
| WDR44   | 0.395441234  | 0.69348317  | 0.586394035  | 0.559901987 | -0.820405248 | 0.415449084 |
| WDR45   | -2.513620867 | 0.013787321 | -0.679736104 | 0.49939449  | -0.595620891 | 0.553818122 |
| WDR45L  | -0.403322762 | 0.687698178 | -1.262753391 | 0.211766302 | -2.395976046 | 0.019927497 |
| WDR46   | -0.49481994  | 0.621971852 | 2.585349995  | 0.012282274 | 2.966261114  | 0.004418664 |
| WDR47   | 0.350417575  | 0.726870508 | 0.650963101  | 0.517659006 | -0.832991345 | 0.408373434 |
| WDR48   | 0.235645898  | 0.814260082 | -0.227974272 | 0.820473634 | 0.624198167  | 0.535021533 |
| WDR5    | 1.131795708  | 0.260823577 | 2.283336005  | 0.026118284 | 2.682742301  | 0.009570713 |
| WDR52   | 2.651751021  | 0.009511402 | 0.151036792  | 0.880474441 | 1.017765709  | 0.313148006 |
| WDR53   | -0.578432985 | 0.56446299  | 1.27918011   | 0.205963184 | 1.299633766  | 0.199028827 |
| WDR54   | -0.40008527  | 0.690072251 | 0.936651046  | 0.352849004 | 1.834865065  | 0.071816719 |
| WDR55   | 0.752439347  | 0.453813556 | 1.231688563  | 0.223070579 | 2.31883655   | 0.024062313 |
| WDR59   | 0.728553502  | 0.468227172 | 2.096206601  | 0.040467847 | 2.369105203  | 0.021289392 |
| WDR5B   | 0.38366587   | 0.702160089 | -2.130436277 | 0.037418101 | -1.860364538 | 0.068065892 |
| WDR6    | 1.992352327  | 0.049460735 | 1.923534266  | 0.059360364 | 2.675836398  | 0.00974695  |
| WDR60   | 3.310469563  | 0.001355942 | -0.138444195 | 0.890372276 | 1.309054755  | 0.195839657 |
| WDR61   | 0.997171542  | 0.321440697 | 0.036616615  | 0.97091731  | 1.485927561  | 0.142883148 |
| WDR62   | 0.648942238  | 0.518081437 | 0.184047001  | 0.854623032 | 0.944630298  | 0.348888608 |

|         |              |             |              |             |              |             |
|---------|--------------|-------------|--------------|-------------|--------------|-------------|
| WDR66   | -0.199258314 | 0.842524637 | 1.432422799  | 0.157428069 | 2.243320416  | 0.028833083 |
| WDR67   | 1.037807685  | 0.30222922  | -0.71689677  | 0.47633497  | 0.586556024  | 0.559849155 |
| WDR7    | 0.763057947  | 0.447488528 | 0.922477412  | 0.360127829 | -0.09789044  | 0.92236736  |
| WDR70   | 0.770516239  | 0.443076599 | 1.50016445   | 0.139033847 | 3.031140858  | 0.003679068 |
| WDR73   | 1.64521494   | 0.103526159 | 0.90506168   | 0.369203107 | 1.813934791  | 0.075023992 |
| WDR74   | 1.193660282  | 0.235848597 | 2.28552465   | 0.025981316 | 3.110637135  | 0.002903091 |
| WDR75   | 2.511783812  | 0.01385431  | 0.13403644   | 0.89384102  | 0.479729282  | 0.633280454 |
| WDR76   | 2.830230668  | 0.005772955 | 0.268069061  | 0.789603895 | 0.273200409  | 0.785699974 |
| WDR77   | 1.901567011  | 0.06053026  | 2.478254779  | 0.016155764 | 2.887207504  | 0.005506418 |
| WDR78   | 0.923391124  | 0.358351808 | -1.636728091 | 0.107140416 | -0.882814606 | 0.381094678 |
| WDR81   | 0.584203044  | 0.560592235 | 0.984694501  | 0.328892647 | 1.024838249  | 0.309827746 |
| WDR82   | -1.150398964 | 0.253125021 | -0.175966122 | 0.860937784 | 0.150057075  | 0.881256484 |
| WDR83   | -0.223093672 | 0.823984444 | 1.149819448  | 0.254970225 | 1.252036822  | 0.2157388   |
| WDR85   | 1.881302391  | 0.063267953 | 1.335985113  | 0.186808978 | 1.617210774  | 0.111428975 |
| WDR86   | 1.786952249  | 0.077420574 | -1.224250201 | 0.225841957 | -0.558370424 | 0.578807911 |
| WDR88   | 1.052317636  | 0.295561575 | -0.594543559 | 0.554477045 | -0.510511578 | 0.611691262 |
| WDR89   | 1.683884465  | 0.09578111  | 0.378751546  | 0.706264964 | 0.938946399  | 0.351773693 |
| WDR90   | 2.460465149  | 0.015847789 | -0.032863163 | 0.97389733  | -0.07532281  | 0.940225184 |
| WDR91   | 1.641367761  | 0.10432365  | 2.88871062   | 0.005442308 | 2.333740249  | 0.023208413 |
| WDR92   | 0.268026572  | 0.789311947 | 1.660647261  | 0.102219269 | 2.182018558  | 0.033302161 |
| WDSUB1  | 0.495602594  | 0.621421707 | 0.233517282  | 0.816187722 | 0.202927094  | 0.839924445 |
| WDTC1   | -1.872712918 | 0.064459391 | -0.455901121 | 0.650175388 | -0.194082082 | 0.846810983 |
| WDYHV1  | 1.455468576  | 0.149130808 | 0.012981036  | 0.989687783 | 0.486833216  | 0.628268631 |
| WEE1    | 0.51852526   | 0.605405337 | -0.100995591 | 0.919904715 | -0.880462805 | 0.382355923 |
| WFIKKN1 | 1.932694038  | 0.056519984 | -1.692751922 | 0.095905804 | -2.149206756 | 0.035935818 |
| WFS1    | 0.574603302  | 0.567039279 | 0.91983127   | 0.361497391 | 1.194202862  | 0.237411459 |
| WHAMM   | 0.865339141  | 0.389227451 | -0.610981132 | 0.54361585  | -0.737858061 | 0.463668587 |
| WHAMMP2 | 1.163616613  | 0.247753928 | -1.135358367 | 0.260927772 | -1.368525328 | 0.176590177 |
| WHAMMP3 | 0.531324405  | 0.59654503  | 0.490496631  | 0.625645997 | -1.641118833 | 0.106354437 |
| WHSC1   | 3.12246424   | 0.002433694 | 0.505106026  | 0.61541172  | 0.832849059  | 0.40845301  |
| WHSC1L1 | -0.629002642 | 0.530991885 | 0.775694732  | 0.441102713 | 0.057212987  | 0.954578334 |
| WHSC2   | 0.304598362  | 0.761397929 | -0.869898444 | 0.387966859 | -1.511048744 | 0.13637514  |
| WIBG    | -0.099830097 | 0.920708398 | -0.584796655 | 0.560968413 | 0.366555982  | 0.7153258   |
| WIPF1   | -1.65355671  | 0.101813902 | -1.717290021 | 0.091299313 | -3.379342189 | 0.001325819 |
| WIPF2   | -1.369853982 | 0.174249972 | -0.919233646 | 0.361807166 | -0.892475414 | 0.375941257 |
| WIP1    | -2.956357027 | 0.004004056 | -2.211063863 | 0.031015854 | -2.814847902 | 0.006714641 |
| WIP2    | -1.700142463 | 0.092668888 | 1.894087659  | 0.063238637 | 2.403094999  | 0.01958002  |
| WIZ     | -0.746791376 | 0.457198593 | -2.339843101 | 0.022780094 | -1.27310421  | 0.208218766 |
| WLS     | -2.925637801 | 0.004381538 | -0.271456741 | 0.787010367 | -0.014249731 | 0.988681178 |
| WNK1    | -2.815275976 | 0.006024632 | -0.703865021 | 0.48435282  | -0.850846152 | 0.398463167 |
| WNK2    | -0.600777628 | 0.549546709 | -0.554961114 | 0.581070179 | 1.161632689  | 0.250291352 |
| WNK3    | 0.710904787  | 0.479040699 | 0.578690069  | 0.565054503 | -0.378599705 | 0.706410691 |
| WNT1    | 0.583537583  | 0.561037981 | -3.366175577 | 0.001362396 | -2.297404155 | 0.025339299 |
| WNT10A  | 0.527085203  | 0.599472996 | 0.822079557  | 0.414421886 | 0.619981959  | 0.537773827 |
| WNT10B  | 3.585318479  | 0.000554432 | -0.938449977 | 0.351932045 | 0.064365116  | 0.948907757 |
| WNT11   | 0.106259324  | 0.915620706 | 1.029733189  | 0.307440178 | 1.477401438  | 0.145146785 |
| WNT16   | -0.517588964 | 0.606055843 | 0.681664554  | 0.498183027 | 0.393430105  | 0.695489485 |
| WNT3    | 0.69733046   | 0.48745131  | 0.360377498  | 0.719883108 | -0.066095938 | 0.94753586  |
| WNT4    | -0.870712685 | 0.386302112 | 0.525590812  | 0.601190275 | 1.336573767  | 0.186744323 |
| WNT5B   | -0.506274305 | 0.613941893 | 0.95126522   | 0.345444665 | 1.749586121  | 0.085644984 |
| WNT6    | -0.429164981 | 0.668861767 | -1.535369568 | 0.130168521 | -0.948304006 | 0.347032108 |
| WNT7A   | 1.637508519  | 0.105128622 | 0.757645517  | 0.451751931 | 1.858854949  | 0.068283245 |
| WRAP53  | -0.693773614 | 0.489668455 | 2.666685408  | 0.009927184 | 3.112129892  | 0.002917805 |
| WRAP73  | 0.141435614  | 0.887852104 | 1.778498027  | 0.080599969 | 1.145396329  | 0.256896036 |
| WRB     | -1.405439873 | 0.163443844 | -0.192181261 | 0.848276203 | -0.317626746 | 0.751944455 |
| WRN     | 1.050275329  | 0.296493954 | 0.739964426  | 0.462327178 | 1.124753132  | 0.265471459 |
| WRNIP1  | 1.119060093  | 0.266188041 | 1.428014492  | 0.15868779  | 0.445745803  | 0.657492257 |
| WSB1    | 1.863022354  | 0.06582612  | -0.009414443 | 0.992521005 | -0.356931545 | 0.722478931 |
| WSB2    | -0.986944459 | 0.326400844 | 1.370265628  | 0.175921472 | 0.244510281  | 0.807725578 |
| WTAP    | 0.633784954  | 0.527880371 | -0.110751279 | 0.912198605 | -0.245165853 | 0.807220465 |
| WWC1    | -0.749925209 | 0.455318593 | 0.604826741  | 0.547669639 | 0.759465485  | 0.45074604  |
| WWC2    | 0.124196934  | 0.901445233 | 0.950210947  | 0.345975392 | -1.166897201 | 0.248176201 |
| WWC3    | -0.250185868 | 0.803032179 | -0.880852851 | 0.382058395 | -1.434950502 | 0.156839506 |
| WWOX    | 1.595081049  | 0.114312758 | -0.172701836 | 0.863491254 | -0.544268704 | 0.588408188 |
| WWP1    | 2.109845638  | 0.037737442 | 0.497750474  | 0.620555059 | 0.547960601  | 0.585887499 |
| WWP2    | -2.436320931 | 0.016871549 | 1.253387615  | 0.215128806 | 1.091445792  | 0.279730885 |
| XAB2    | -0.691283199 | 0.491224127 | 1.000520241  | 0.321243785 | 1.126640837  | 0.264678973 |
| XAF1    | -1.779133787 | 0.078702806 | 0.544509531  | 0.58819292  | -1.334983388 | 0.187261085 |
| XBP1    | -0.267854198 | 0.7894442   | 1.003239797  | 0.319941475 | 2.01474469   | 0.04872217  |
| XCL1    | 1.118900052  | 0.266255941 | -2.11405149  | 0.038851953 | -1.598167444 | 0.115609858 |
| XCL2    | 1.357890287  | 0.178002302 | -3.401292718 | 0.00122477  | -2.787676625 | 0.00722836  |
| XIAP    | -2.061196786 | 0.04226302  | 0.071351505  | 0.943365186 | 0.385009987  | 0.701682335 |

|          |              |             |              |             |              |             |
|----------|--------------|-------------|--------------|-------------|--------------|-------------|
| XIST     | 0.440470789  | 0.660686285 | -1.638942085 | 0.106676963 | -2.364033495 | 0.021555588 |
| XK       | -3.22117351  | 0.00179516  | 0.516312161  | 0.60761308  | -0.291550647 | 0.77170295  |
| XKR3     | -2.197600787 | 0.03062819  | -0.067953197 | 0.946058245 | 0.517873202  | 0.606578141 |
| XKR6     | 0.376559061  | 0.707416151 | -2.489232877 | 0.015713263 | -2.051386533 | 0.044897783 |
| XKR8     | -4.006021062 | 0.000129597 | -0.700492512 | 0.486439939 | -0.77441235  | 0.441930741 |
| XKR9     | 0.293019289  | 0.770203665 | 0.325657492  | 0.745863676 | -0.214064749 | 0.831270832 |
| XKRX     | 1.968484214  | 0.052189228 | -0.644447696 | 0.521843589 | 1.14010433   | 0.259075346 |
| XPA      | 1.651661781  | 0.102200834 | -1.129901118 | 0.263201482 | -0.079234166 | 0.937127646 |
| XPC      | -1.271703215 | 0.206860325 | 1.543696669  | 0.128138841 | 1.252009834  | 0.215748561 |
| XPNPEP1  | -1.162868643 | 0.248055689 | 0.797225857  | 0.428594204 | 0.847782383  | 0.400153056 |
| XPNPEP2  | 1.577628991  | 0.118272371 | -2.379316337 | 0.020679398 | -0.815359173 | 0.418306647 |
| XPNPEP3  | 0.084759549  | 0.932646874 | -1.75029006  | 0.085393588 | -0.399846983 | 0.690783921 |
| XPO1     | -0.190928491 | 0.849025507 | -0.23274784  | 0.816782329 | -1.030220476 | 0.307317071 |
| XPO4     | 1.572681551  | 0.119414563 | -0.341313218 | 0.73410985  | -0.590266953 | 0.557376251 |
| XPO5     | 0.727911399  | 0.468618169 | 2.600763419  | 0.011800285 | 2.868716893  | 0.005794378 |
| XPO6     | -1.124108824 | 0.264052255 | -0.407521268 | 0.685135932 | -0.755197022 | 0.453282122 |
| XPO7     | -2.087014509 | 0.039806287 | 0.17041589   | 0.865280295 | 0.100709019  | 0.92013964  |
| XPOT     | 1.621869512  | 0.108442117 | -0.763139579 | 0.448494677 | -0.742382815 | 0.460945093 |
| XPR1     | 0.411930162  | 0.681401586 | -2.398634201 | 0.01971591  | -2.674596373 | 0.009778907 |
| XRCC1    | -1.065644518 | 0.289526487 | 0.776741967  | 0.440489396 | 1.023947218  | 0.310244729 |
| XRCC2    | -0.562508646 | 0.575212979 | 1.372483942  | 0.175234016 | 0.806346788  | 0.423439779 |
| XRCC3    | 2.763430925  | 0.00697698  | 2.179239029  | 0.033417701 | 2.329529165  | 0.023446904 |
| XRCC4    | -0.532114338 | 0.596000166 | -0.349287714 | 0.728147136 | -0.537564393 | 0.592998748 |
| XRCC5    | -0.367166368 | 0.714384593 | 2.625183403  | 0.011071799 | 2.628870974  | 0.011026416 |
| XRCC6    | -1.284955975 | 0.202210792 | 2.478608751  | 0.016141323 | 2.871858851  | 0.005744484 |
| XRCC6BP1 | 0.107350463  | 0.91475759  | -1.096554355 | 0.277399919 | -0.155284917 | 0.877152732 |
| XRN1     | 0.080160844  | 0.936293041 | -1.979611507 | 0.052533083 | -3.711956528 | 0.000473588 |
| XRN2     | 0.151622577  | 0.879834908 | 1.185697685  | 0.240610363 | 0.429060046  | 0.669518762 |
| XRRA1    | -0.05945497  | 0.952725793 | 0.792422929  | 0.431365975 | 1.370546499  | 0.175962342 |
| XYLB     | 2.477156873  | 0.282716345 | -0.236340167 | 0.814007197 | -0.521256943 | 0.604234514 |
| XYLT1    | -0.564179596 | 0.574080366 | 0.171645055  | 0.86431823  | 0.411884627  | 0.681989729 |
| XYLT2    | 2.485845418  | 0.01483187  | -0.556922552 | 0.579738091 | 1.108782283  | 0.272243437 |
| YAF2     | 0.003644026  | 0.997100819 | -1.530907534 | 0.131266603 | -1.257934032 | 0.213613816 |
| YARS     | -0.000128687 | 0.999897617 | 2.500620582  | 0.015265838 | 3.023827229  | 0.003756254 |
| YARS2    | 1.080913521  | 0.282716345 | -1.352738139 | 0.181425995 | 0.110434262  | 0.912458154 |
| YBEY     | 0.632978259  | 0.528404567 | -1.448125218 | 0.153004045 | 0.482248722  | 0.631500996 |
| YBX1     | -3.829868005 | 0.000241048 | -1.98476176  | 0.051941233 | -1.998257875 | 0.050532579 |
| YDJC     | 1.235978216  | 0.219786222 | -2.562082059 | 0.013043838 | -1.701399815 | 0.094391319 |
| YEATS2   | 0.280371889  | 0.779856368 | 1.844342689  | 0.070278087 | 1.33916922   | 0.185903307 |
| YEATS4   | 0.807478748  | 0.421588161 | 1.114768947  | 0.269579437 | 1.360899943  | 0.178974285 |
| YES1     | 1.180319839  | 0.241083187 | -0.770322343 | 0.444256954 | -0.603528645 | 0.548583751 |
| YIF1A    | 0.17100449   | 0.864616466 | -1.149685727 | 0.255024866 | -0.166156919 | 0.868629401 |
| YIF1B    | -1.460947191 | 0.147624412 | -1.9763122   | 0.05291526  | -1.637371652 | 0.107137126 |
| YIPF1    | -1.197169197 | 0.23448544  | 1.32622701   | 0.189999715 | 0.901448353  | 0.371194537 |
| YIPF2    | -0.660053519 | 0.51095943  | -0.090804643 | 0.927962881 | 0.075422886  | 0.940145919 |
| YIPF3    | -3.226470627 | 0.001765773 | -0.257544559 | 0.797676352 | -0.218883273 | 0.827533422 |
| YIPF4    | 0.194891431  | 0.845931366 | -0.504067643 | 0.616136638 | -1.178206704 | 0.243675822 |
| YIPF5    | -0.177076847 | 0.859858736 | 0.329498033  | 0.742974572 | 0.947689592  | 0.34734215  |
| YIPF6    | -0.039580036 | 0.968518434 | -1.652148746 | 0.103946193 | -3.034685499 | 0.003642194 |
| YJEFN3   | 0.077202491  | 0.938639349 | 0.081037743  | 0.935692878 | 1.392866675  | 0.169142247 |
| YKT6     | -1.800282375 | 0.075274369 | -1.01139343  | 0.316058219 | 0.28377915   | 0.777621808 |
| YLPM1    | 0.817170368  | 0.416058434 | 1.771287982  | 0.081803387 | 1.499841739  | 0.139248867 |
| YME1L1   | -0.076373942 | 0.93929658  | 0.380573235  | 0.704919956 | -0.364911508 | 0.71654622  |
| YOD1     | -1.060091998 | 0.292030614 | -0.767240071 | 0.446072569 | -1.591867621 | 0.117020518 |
| YPEL1    | 1.396238479  | 0.166187455 | -3.031519313 | 0.003642706 | -1.913499702 | 0.060779409 |
| YPEL2    | 2.089265162  | 0.039598083 | 1.321131944  | 0.191682004 | 0.25499827   | 0.799654685 |
| YPEL3    | -1.99114374  | 0.04959591  | -2.31699743  | 0.024081007 | -2.738206565 | 0.008257673 |
| YPEL4    | -3.036438813 | 0.003156666 | 0.308373862  | 0.758910433 | -1.405288132 | 0.165435997 |
| YPEL5    | -1.346637548 | 0.181587187 | -0.744087489 | 0.459848529 | -1.017321619 | 0.313357288 |
| YRDC     | 0.411255708  | 0.681894163 | -1.812707458 | 0.075089497 | -1.870668322 | 0.066597886 |
| YTHDC1   | 0.864599827  | 0.389631002 | 0.087765628  | 0.930367393 | -0.516703982 | 0.607388928 |
| YTHDC2   | 2.085123938  | 0.03998191  | 0.596544214  | 0.553149301 | 0.436702299  | 0.66399945  |
| YTHDF1   | 0.510278409  | 0.611145866 | 0.880176283  | 0.382421665 | 0.894554705  | 0.374837892 |
| YTHDF2   | -0.015939054 | 0.98731943  | 1.544950698  | 0.127835379 | 1.459194313  | 0.150075027 |
| YTHDF3   | -0.057510807 | 0.954269896 | -0.774620254 | 0.441732506 | -1.811895613 | 0.075342792 |
| YWHAB    | -2.089585707 | 0.039568507 | 1.717352986  | 0.091287732 | 1.939818338  | 0.057423131 |
| YWHAE    | -0.087934897 | 0.930130076 | 1.89274108   | 0.063421012 | 1.80530665   | 0.076380665 |
| YWHAG    | 1.47562681   | 0.143646422 | 0.734214471  | 0.465796601 | -0.004341565 | 0.996551308 |
| YWHAH    | -2.090709478 | 0.039464968 | 1.868085544  | 0.066839877 | 1.481955465  | 0.143934232 |
| YWHAQ    | -0.472033767 | 0.638081944 | -1.455110265 | 0.151067521 | -1.172514256 | 0.245933601 |
| YWHAZ    | -1.195558236 | 0.235110566 | -0.125727121 | 0.900385771 | -0.007088889 | 0.99436902  |
| YY1      | -1.110301322 | 0.269921933 | -0.994226608 | 0.324271217 | -2.823728783 | 0.00655418  |

|          |              |             |              |             |              |             |
|----------|--------------|-------------|--------------|-------------|--------------|-------------|
| YY1AP1   | -2.763851685 | 0.006968727 | 0.808014497  | 0.422406973 | 1.210106839  | 0.231299842 |
| YY2      | 0.591250828  | 0.555882149 | -0.161813888 | 0.872018726 | -0.776836839 | 0.440510447 |
| ZADH2    | 1.765925781  | 0.080908827 | -1.261688113 | 0.212146783 | -1.145856508 | 0.256707147 |
| ZAK      | -0.120072256 | 0.904702164 | 1.747321083  | 0.085911616 | 0.945783957  | 0.348304912 |
| ZAP70    | 1.618652805  | 0.10913397  | -2.017690324 | 0.048290887 | -0.872423914 | 0.386686902 |
| ZBED1    | -1.722609794 | 0.088504464 | 1.442020152  | 0.154712427 | 1.292822968  | 0.201358565 |
| ZBED2    | -0.890479443 | 0.37565912  | -1.401150902 | 0.166534233 | -0.232229925 | 0.817202481 |
| ZBED3    | 2.252396398  | 0.026808338 | -0.645215276 | 0.521349677 | -0.516743187 | 0.607361733 |
| ZBED4    | 1.263946792  | 0.209617919 | -0.309207574 | 0.758279441 | -0.348362994 | 0.728868351 |
| ZBED5    | 1.093490455  | 0.277190476 | -0.295299922 | 0.768826691 | -0.565108205 | 0.574247738 |
| ZBED6    | 0.137254243  | 0.891146297 | 0.383669583  | 0.702635999 | -0.758023255 | 0.451602008 |
| ZBP1     | -3.58137964  | 0.000561762 | -0.417916953 | 0.67756182  | -1.816281669 | 0.074658488 |
| ZBTB1    | 1.120099852  | 0.265747201 | -0.243041842 | 0.808836466 | -1.306033453 | 0.196858205 |
| ZBTB10   | 2.054047367  | 0.042965989 | -0.301624315 | 0.764024834 | -1.428060886 | 0.158804536 |
| ZBTB11   | 0.848066482  | 0.398723141 | -0.815821922 | 0.417963133 | -1.810150041 | 0.075616591 |
| ZBTB12   | 0.394757585  | 0.693985828 | -2.183234186 | 0.03310748  | -1.818664056 | 0.074288982 |
| ZBTB16   | 1.271565975  | 0.206908883 | -0.244519147 | 0.807697782 | -1.627008495 | 0.10932614  |
| ZBTB17   | 0.124382066  | 0.901299088 | 0.225312199  | 0.822533942 | 0.385282215  | 0.701481795 |
| ZBTB2    | -1.234616431 | 0.220290354 | -1.291026796 | 0.201852223 | -1.531473007 | 0.131258982 |
| ZBTB20   | -0.077464155 | 0.938431798 | -0.589364066 | 0.557921853 | -1.337372978 | 0.186485044 |
| ZBTB22   | -0.001794735 | 0.99857211  | -4.123695868 | 0.000121191 | -3.992083115 | 0.000191816 |
| ZBTB24   | 0.507863366  | 0.612831581 | -0.536316484 | 0.593805269 | 1.472959918  | 0.146337107 |
| ZBTB25   | 2.667963187  | 0.009097889 | -1.078201617 | 0.285438727 | -1.250650151 | 0.216240732 |
| ZBTB26   | 1.422916102  | 0.158328715 | -1.741491433 | 0.086936356 | -2.456055869 | 0.017161069 |
| ZBTB3    | -1.224055902 | 0.22422852  | 2.220247096  | 0.030351663 | 3.269601703  | 0.001841003 |
| ZBTB32   | 0.556638866  | 0.579200159 | 0.859506017  | 0.393624724 | 1.168113735  | 0.24768926  |
| ZBTB33   | 0.599303257  | 0.550524811 | -1.264958587 | 0.210980291 | -2.030192761 | 0.047076845 |
| ZBTB34   | -1.06006782  | 0.29204155  | -0.861853048 | 0.392342486 | -2.586227319 | 0.012318957 |
| ZBTB37   | -1.198715037 | 0.23388671  | -2.977006445 | 0.004251674 | -3.248243445 | 0.001961111 |
| ZBTB38   | 1.141748604  | 0.256684529 | -0.619588997 | 0.537971818 | -1.729519174 | 0.089202086 |
| ZBTB39   | 1.089186828  | 0.279072856 | -0.969617511 | 0.33629142  | -0.763072154 | 0.448609603 |
| ZBTB4    | 1.971280681  | 0.051863064 | -0.861035577 | 0.392788794 | -0.413494586 | 0.680816884 |
| ZBTB40   | 3.895899202  | 0.000191396 | 1.007292692  | 0.318007254 | 2.168438229  | 0.034370905 |
| ZBTB41   | 0.491551256  | 0.624271806 | -0.114178708 | 0.909493218 | -1.060519359 | 0.293441937 |
| ZBTB42   | 0.117091803  | 0.90705661  | 1.06297309   | 0.292230671 | -0.505252564 | 0.615374991 |
| ZBTB43   | 0.073613388  | 0.941486639 | -1.778629835 | 0.080578107 | -2.344440004 | 0.022612142 |
| ZBTB44   | -0.553964259 | 0.581021313 | -0.643330399 | 0.522562973 | -1.585325557 | 0.118500076 |
| ZBTB45   | -0.243276538 | 0.808362629 | -1.266280576 | 0.210510126 | -1.054383027 | 0.296216605 |
| ZBTB46   | 1.463170021  | 0.147016609 | -1.520461047 | 0.133866255 | 0.32233396   | 0.748394972 |
| ZBTB47   | -1.02300634  | 0.309134907 | 0.310929594  | 0.75697666  | 0.625621672  | 0.534093934 |
| ZBTB48   | -0.579632614 | 0.563657161 | 0.538742506  | 0.592140791 | 1.409944755  | 0.164062854 |
| ZBTB49   | -0.775084569 | 0.440386755 | -2.750013629 | 0.007949164 | -3.493987947 | 0.000935099 |
| ZBTB5    | 1.751329839  | 0.08340581  | -0.907992315 | 0.367665831 | -1.150627465 | 0.254754662 |
| ZBTB6    | 0.036817004  | 0.970715081 | -1.137300134 | 0.260122125 | -1.78276811  | 0.080021778 |
| ZBTB7A   | 0.214384286  | 0.830747997 | -2.757768987 | 0.007784829 | -2.642339035 | 0.010644665 |
| ZBTB7B   | -0.972144781 | 0.333667826 | -2.207422161 | 0.031282771 | -2.652963469 | 0.010352074 |
| ZBTB7C   | 0.537086171  | 0.592576103 | -0.042307832 | 0.966399629 | 0.855382831  | 0.395968983 |
| ZBTB8A   | 0.137009941  | 0.891338824 | 2.47787611   | 0.016171226 | 1.904416488  | 0.061975846 |
| ZBTB8OS  | 1.465226455  | 0.14645604  | -1.485126888 | 0.142963162 | -0.839394068 | 0.404802403 |
| ZBTB9    | 0.150321925  | 0.880857849 | -0.208644245 | 0.835462083 | 0.786445971  | 0.434907801 |
| ZC3H10   | -1.438459677 | 0.153883663 | -1.314933905 | 0.193743601 | -2.020048569 | 0.048151766 |
| ZC3H11A  | 0.556734727  | 0.579134937 | -0.259297764 | 0.796330047 | -1.137115325 | 0.260312052 |
| ZC3H12A  | 0.662916949  | 0.509132523 | -2.727056253 | 0.00845449  | -3.122992963 | 0.002827726 |
| ZC3H12B  | 1.709557193  | 0.090904739 | 0.434073069  | 0.665857103 | 0.656179765  | 0.514384422 |
| ZC3H12C  | 1.923359703  | 0.05769827  | -1.325831967 | 0.19012975  | -0.372110476 | 0.71120916  |
| ZC3H12D  | 1.919169923  | 0.058233869 | 0.902653189  | 0.370469557 | 1.394319734  | 0.168705435 |
| ZC3H13   | 0.14265346   | 0.886893021 | 1.631661002  | 0.108207266 | 1.020259107  | 0.311974725 |
| ZC3H14   | 1.809218636  | 0.073863441 | 0.429919168  | 0.668858682 | 0.730729306  | 0.467978074 |
| ZC3H15   | 0.915740394  | 0.362328907 | 0.056005978  | 0.955530878 | 0.045758742  | 0.963664648 |
| ZC3H18   | -1.044951756 | 0.298933739 | 0.605981584  | 0.546907797 | 0.445047074  | 0.657994081 |
| ZC3H3    | -1.441105872 | 0.153136627 | -1.036679878 | 0.304217928 | -0.294558454 | 0.769415807 |
| ZC3H4    | -0.468843606 | 0.640351601 | 0.68726678   | 0.494672795 | 0.662720035  | 0.510217037 |
| ZC3H6    | 1.785817143  | 0.077605651 | -1.34536406  | 0.183780659 | -1.930570817 | 0.058583937 |
| ZC3H7A   | 0.711333558  | 0.478776353 | 2.580729301  | 0.012430215 | 2.265860113  | 0.027328307 |
| ZC3H7B   | 2.515374828  | 0.013723633 | -0.850045714 | 0.39881946  | -0.309704291 | 0.757930544 |
| ZC3H8    | 0.77044983   | 0.443115771 | -1.380855747 | 0.172658114 | -1.613583056 | 0.112215841 |
| ZC3HAV1  | 0.010741241  | 0.991454434 | -1.656772532 | 0.103003698 | -2.726060318 | 0.008530198 |
| ZC3HAV1L | 1.221992427  | 0.225003961 | -0.690264783 | 0.492799899 | -1.716915258 | 0.091498132 |
| ZC3HC1   | 0.205699078  | 0.837505501 | 2.606828204  | 0.0116154   | 3.270443243  | 0.001836416 |
| ZC4H2    | -0.191353033 | 0.848693924 | 1.195202948  | 0.236905845 | 2.802972951  | 0.006934867 |
| ZCCHC10  | 1.133876655  | 0.259954326 | -0.225155292 | 0.822655419 | -0.399163234 | 0.691284742 |
| ZCCHC11  | 1.896041048  | 0.061266713 | -0.121700748 | 0.903559633 | 0.016765062  | 0.986683381 |

|          |              |             |              |             |              |             |
|----------|--------------|-------------|--------------|-------------|--------------|-------------|
| ZCCHC14  | 1.539067573  | 0.127409289 | -0.935287808 | 0.353544912 | -1.553937692 | 0.125809429 |
| ZCCHC17  | -0.753673742 | 0.453075657 | -0.349123765 | 0.728269556 | -0.184197923 | 0.854520793 |
| ZCCHC18  | 1.235915893  | 0.219809275 | -1.153820499 | 0.253339183 | -0.010521411 | 0.99164252  |
| ZCCHC2   | -1.911803965 | 0.059185668 | -0.666058557 | 0.508032691 | -3.417367439 | 0.001181659 |
| ZCCHC24  | -3.233270091 | 0.00172871  | 2.526569413  | 0.014289009 | 0.664157772  | 0.509303365 |
| ZCCHC3   | 1.263915491  | 0.209629102 | -4.200564944 | 9.36E-05    | -4.224011991 | 8.87E-05    |
| ZCCHC4   | 2.113340581  | 0.037429104 | -0.90516952  | 0.369146467 | -0.789463207 | 0.433157339 |
| ZCCHC6   | 0.290535115  | 0.772096825 | -0.911479931 | 0.365841729 | -2.533935344 | 0.014091338 |
| ZCCHC7   | 0.416433767  | 0.678115993 | -0.600467412 | 0.550550305 | -0.613826885 | 0.541804859 |
| ZCCHC8   | 1.521012017  | 0.131875287 | -2.14559008  | 0.036133331 | -2.570196355 | 0.012839485 |
| ZCCHC9   | -0.017585637 | 0.986009595 | -2.040172724 | 0.045927511 | -2.260575011 | 0.027674763 |
| ZCRB1    | 1.016437737  | 0.312233271 | -1.356308068 | 0.180294344 | -0.749676883 | 0.456574111 |
| ZCWPW1   | -0.200033142 | 0.841920483 | 1.667498693  | 0.100844158 | 1.815973702  | 0.074706365 |
| ZDBF2    | 1.062433295  | 0.290972915 | -0.01524538  | 0.987889105 | -1.142300702 | 0.258169262 |
| ZDHH1    | -2.042021896 | 0.04417108  | -2.002983793 | 0.049892953 | -1.869424223 | 0.066773703 |
| ZDHH1C1  | 0.432118694  | 0.666721963 | 0.866211931  | 0.389968032 | 1.904624904  | 0.061948171 |
| ZDHH1C2  | -1.605721808 | 0.111951082 | 0.478515091  | 0.634095122 | 0.143220163  | 0.886628252 |
| ZDHH1C3  | 0.767187109  | 0.445042803 | -1.682751463 | 0.09783715  | -1.691028971 | 0.096366858 |
| ZDHH1C4  | 0.558095296  | 0.578209615 | -2.32577651  | 0.023573406 | -1.772707432 | 0.081693238 |
| ZDHH1C5  | 0.430238144  | 0.668084001 | -0.487098409 | 0.628037295 | -1.05161573  | 0.297473775 |
| ZDHH1C6  | 1.553824261  | 0.12384887  | -1.188448512 | 0.239533993 | -1.19764416  | 0.236079193 |
| ZDHH1C7  | 0.454436942  | 0.650643725 | -1.530782902 | 0.13129738  | -2.698314616 | 0.009183969 |
| ZDHH1C8  | -2.70656234  | 0.008178285 | -0.254564245 | 0.799966381 | 0.015085866  | 0.988017071 |
| ZDHH1C9  | -0.071254737 | 0.943358209 | 0.26405759   | 0.792678076 | -1.570461303 | 0.121917789 |
| ZDHH2    | -0.815875413 | 0.416794763 | -0.923492774 | 0.359603198 | -1.476292449 | 0.145443277 |
| ZDHH2C0  | 0.618456439  | 0.537886853 | -0.997908317 | 0.322497894 | -1.816691879 | 0.074594755 |
| ZDHH2C1  | 1.617266468  | 0.109433238 | -0.210379213 | 0.834114198 | -1.76713443  | 0.082631577 |
| ZDHH2C2  | 1.502467658  | 0.13658972  | -0.521863058 | 0.603766896 | -1.057333165 | 0.294880397 |
| ZDHH2C4  | 1.216618593  | 0.227032556 | -1.273044493 | 0.20811671  | -1.549482937 | 0.126875449 |
| ZDHH3    | -1.219353813 | 0.225998373 | -0.91051612  | 0.366345243 | -0.111328334 | 0.911175238 |
| ZDHH4    | 0.450540891  | 0.653438855 | 0.683263756  | 0.497179617 | 2.797992593  | 0.007029197 |
| ZDHH5    | -1.685996001 | 0.095372157 | 0.128655883  | 0.898078144 | 0.508021735  | 0.613425042 |
| ZDHH6    | 1.249060769  | 0.214985933 | -1.621583891 | 0.110354589 | -0.739654757 | 0.462586038 |
| ZDHH7    | -2.536351283 | 0.01298219  | -1.110908218 | 0.271223952 | 0.847741585  | 0.400175588 |
| ZDHH8    | 1.662933916  | 0.099916567 | -1.829576977 | 0.072490521 | -0.92500359  | 0.358916416 |
| ZDHH9    | 0.97178138   | 0.33384759  | 0.316646558  | 0.752656633 | 0.549679801  | 0.584715453 |
| ZEB1     | 0.09468531   | 0.924782054 | -0.624260686 | 0.534921356 | -2.312402541 | 0.024439511 |
| ZEB1-AS1 | 0.718004021  | 0.474674336 | -1.9645496   | 0.05429725  | -2.435305507 | 0.018074804 |
| ZEB2     | 0.484609288  | 0.629168754 | -1.230688549 | 0.223441704 | -1.851010841 | 0.069422106 |
| ZER1     | -2.895529175 | 0.004783112 | 0.683797956  | 0.496844682 | 0.649538102  | 0.518634939 |
| ZFAND1   | 0.73901002   | 0.461885791 | -0.895049749 | 0.374485788 | -0.68185251  | 0.498130902 |
| ZFAND2A  | -1.595333409 | 0.114256289 | -1.568613444 | 0.122216057 | -0.882475252 | 0.381276507 |
| ZFAND2B  | -1.522615288 | 0.131473794 | 0.754123647  | 0.453847137 | 0.741681123  | 0.461366846 |
| ZFAND3   | -2.185697896 | 0.031518209 | -1.696360146 | 0.095216696 | -2.043152196 | 0.045733381 |
| ZFAND5   | -1.010376148 | 0.315110888 | 0.710051438  | 0.480537263 | -1.049943134 | 0.2982354   |
| ZFAND6   | -0.768004137 | 0.444559793 | -0.464146677 | 0.644292253 | -0.436335536 | 0.664263906 |
| ZFAT     | -1.325434921 | 0.18848956  | 0.546869377  | 0.586581072 | 0.096841581  | 0.923196507 |
| ZFC3H1   | 1.781864269  | 0.078253022 | -2.191154862 | 0.032499915 | -2.690720038 | 0.009370758 |
| ZFH2     | 0.79759187   | 0.427274239 | 0.696332228  | 0.489021443 | 0.640737486  | 0.524295717 |
| ZFH3     | 1.675052236  | 0.097507203 | -0.305388773 | 0.761171034 | 0.678942161  | 0.499959253 |
| ZFP1     | 0.809778579  | 0.420271998 | -1.183634149 | 0.241420095 | -1.531965393 | 0.131137554 |
| ZFP106   | -2.656168087 | 0.009397081 | 1.858096457  | 0.06826869  | 0.793364853  | 0.4309      |
| ZFP112   | 0.111086361  | 0.911803186 | 0.581309852  | 0.563299734 | 0.061518095  | 0.951164721 |
| ZFP14    | 2.139000886  | 0.035231322 | -0.089517369 | 0.92898131  | -0.2062838   | 0.837314244 |
| ZFP161   | 1.676705238  | 0.097182245 | 0.509947274  | 0.612037026 | -0.376076391 | 0.708275149 |
| ZFP2     | -0.156625984 | 0.87590173  | -0.030678521 | 0.975631982 | 0.110621163  | 0.912310609 |
| ZFP28    | 2.154635637  | 0.033947882 | -0.981220356 | 0.330587852 | 0.740324937  | 0.46218261  |
| ZFP3     | 0.121362389  | 0.90368327  | -3.942212827 | 0.000221167 | -2.233654203 | 0.002047357 |
| ZFP30    | 0.949101575  | 0.345192302 | -0.246933753 | 0.805837542 | -0.916253517 | 0.363446448 |
| ZFP36    | -1.308094806 | 0.194279375 | -2.611645429 | 0.011470431 | -3.418414887 | 0.001177906 |
| ZFP36L1  | -1.427013771 | 0.157147399 | -2.132722173 | 0.037221778 | -3.011104667 | 0.003894136 |
| ZFP36L2  | 0.834187653  | 0.406454951 | -1.437263591 | 0.156053733 | -3.095149538 | 0.003064011 |
| ZFP37    | 1.459429173  | 0.148040616 | 0.767630934  | 0.445842091 | 1.058825682  | 0.294205973 |
| ZFP41    | 2.26776407   | 0.025815105 | -0.612619705 | 0.542539139 | -0.049311047 | 0.960846135 |
| ZFP57    | 1.696356655  | 0.093386118 | 0.343315239  | 0.732611328 | -1.064606513 | 0.291603813 |
| ZFP62    | 1.882975104  | 0.063038099 | -0.298511974 | 0.766386759 | 6.00E-05     | 0.999952327 |
| ZFP64    | 1.873763338  | 0.064312685 | 0.121410862  | 0.903788203 | 0.23880688   | 0.812123454 |
| ZFP82    | 0.411432553  | 0.681764994 | 0.336490142  | 0.737724205 | 1.780459468  | 0.080402787 |
| ZFP90    | 1.255291836  | 0.212726822 | -1.224886358 | 0.225603956 | 0.446085771  | 0.65724815  |
| ZFP91    | -0.371352304 | 0.71127601  | -0.905660667 | 0.368888574 | -0.047547007 | 0.96224572  |
| ZFPL1    | -1.595835734 | 0.114143954 | -1.381536415 | 0.172449965 | -1.37725737  | 0.173890004 |
| ZFPM1    | 0.560394796  | 0.576647337 | -2.877415391 | 0.005615161 | -3.131929474 | 0.002755585 |

|              |              |             |              |             |              |             |
|--------------|--------------|-------------|--------------|-------------|--------------|-------------|
| ZFR          | 0.589877537  | 0.556798386 | -0.882857781 | 0.38098316  | -2.041644965 | 0.045888287 |
| ZFR2         | -0.155920756 | 0.876455924 | -1.011928083 | 0.315804698 | 1.717038858  | 0.091475381 |
| ZFX          | 0.455166431  | 0.650120924 | 0.465777971  | 0.643131028 | -0.207287715 | 0.836533948 |
| ZFYVE1       | -2.591868158 | 0.011190718 | 1.456887206  | 0.150577955 | 1.292809865  | 0.201363066 |
| ZFYVE16      | 0.097232506  | 0.92276492  | -1.100087691 | 0.275870601 | -2.563255862 | 0.01307098  |
| ZFYVE19      | 0.007838809  | 0.993763508 | 2.504026129  | 0.015134288 | 2.802919057  | 0.006935881 |
| ZFYVE20      | 1.476257569  | 0.143477387 | 0.53870131   | 0.592169037 | 2.769608378  | 0.007589764 |
| ZFYVE21      | 0.026920108  | 0.978584976 | -2.044503368 | 0.045483934 | -2.697582656 | 0.009201822 |
| ZFYVE26      | 0.525900075  | 0.600292265 | 2.776136763  | 0.007408002 | 2.055602066  | 0.044474927 |
| ZFYVE27      | 0.84185499   | 0.402172328 | 0.160835766  | 0.872785557 | 0.89094408   | 0.376755166 |
| ZFYVE28      | 1.843878953  | 0.068597507 | -2.835253361 | 0.006306239 | -2.077027587 | 0.042378687 |
| ZFYVE9       | 0.457293288  | 0.648597675 | 1.653791604  | 0.103610517 | 2.557073748  | 0.013280364 |
| ZG16B        | -0.929683305 | 0.355101942 | -0.603091039 | 0.548815683 | 0.669733802  | 0.505768174 |
| ZGLP1        | 0.252386771  | 0.801336156 | 1.358568942  | 0.179580446 | 2.220793584  | 0.03040972  |
| ZGPAT        | 0.101974144  | 0.919011354 | 2.077495677  | 0.042224649 | 2.794801042  | 0.007090267 |
| ZHX1         | 0.653714452  | 0.515016202 | -0.54718707  | 0.586364239 | -1.209626687 | 0.23148266  |
| ZHX1-C8ORF76 | 0.545189086  | 0.58701544  | 1.041942949  | 0.301792008 | 1.903808243  | 0.062056674 |
| ZHX2         | -1.263447845 | 0.209796229 | 1.755811106  | 0.084437164 | 1.659464866  | 0.102589359 |
| ZHX3         | 1.338632938  | 0.184170275 | 1.727892683  | 0.089366148 | 2.576774251  | 0.012623528 |
| ZIK1         | 1.799871894  | 0.075339714 | 0.525945547  | 0.600945348 | 1.916637871  | 0.060370643 |
| ZKSCAN1      | 0.185689461  | 0.853119607 | 0.55829763   | 0.5788051   | 0.217695612  | 0.828454243 |
| ZKSCAN2      | 0.731587487  | 0.46638217  | 1.949459984  | 0.056115284 | 2.981474558  | 0.004233758 |
| ZKSCAN3      | 0.401063077  | 0.68935489  | -0.42333564  | 0.673627022 | -0.365917344 | 0.715799667 |
| ZKSCAN4      | -0.964946231 | 0.337240574 | 1.569309967  | 0.122053699 | 1.988693533  | 0.051609134 |
| ZKSCAN5      | -2.234491403 | 0.028007766 | 1.590713108  | 0.117148505 | 2.638684511  | 0.010747041 |
| ZMAT1        | 1.495102471  | 0.138498447 | -1.062145478 | 0.292602954 | -1.61174058  | 0.112617201 |
| ZMAT2        | -2.909315348 | 0.004595209 | -1.102648341 | 0.274765981 | -0.774846976 | 0.441675934 |
| ZMAT3        | 0.00317005   | 0.997477912 | -0.689780057 | 0.493102451 | -0.64344582  | 0.522550191 |
| ZMAT4        | -0.150161462 | 0.880984065 | -0.369372714 | 0.713204472 | 0.529860439  | 0.598294496 |
| ZMAT5        | -1.163233378 | 0.247908507 | 1.300553478  | 0.198591111 | 0.923091762  | 0.359903071 |
| ZMIZ1        | -1.918354468 | 0.058338599 | -0.613769291 | 0.541784395 | -1.47860793  | 0.144824765 |
| ZMIZ2        | 0.356925444  | 0.722010024 | -0.477990358 | 0.634466284 | 0.386698715  | 0.700438656 |
| ZMPSTE24     | -0.952974309 | 0.343237606 | -0.784181062 | 0.436147132 | -1.667786594 | 0.100917784 |
| ZMYM1        | 0.418526142  | 0.676591618 | -0.260116515 | 0.795701533 | -0.754648954 | 0.453608351 |
| ZMYM2        | 2.201643422  | 0.030330943 | -0.53069114  | 0.597673209 | -1.156034834 | 0.252554579 |
| ZMYM3        | 1.21252347   | 0.228587327 | 0.6381039    | 0.525935044 | 0.930861879  | 0.355903958 |
| ZMYM4        | 1.004005287  | 0.318154374 | 2.022681736  | 0.047757317 | 2.00367073   | 0.049931916 |
| ZMYM5        | -0.490555045 | 0.624973515 | -1.994083032 | 0.050884612 | -2.983271038 | 0.004212405 |
| ZMYM6        | 1.929549663  | 0.056914607 | -0.97649     | 0.332905336 | -1.118447439 | 0.268130841 |
| ZMYM6NB      | -0.019731512 | 0.984302638 | -4.188984751 | 9.73E-05    | 3.180595253  | 0.002392089 |
| ZMYND10      | 0.079970012  | 0.936444376 | 0.114536003  | 0.909211254 | -0.256606951 | 0.798418664 |
| ZMYND11      | 2.26599124   | 0.025928009 | -1.17705254  | 0.244015868 | -1.860252133 | 0.068082056 |
| ZMYND15      | -2.590140925 | 0.011242905 | -0.344710415 | 0.731567651 | -0.719339615 | 0.474910438 |
| ZMYND17      | 3.113278568  | 0.002502806 | 1.138874829  | 0.259470077 | 1.354266101  | 0.18106831  |
| ZMYND19      | 1.374074101  | 0.172940796 | -0.494229727 | 0.623023703 | 0.0133307    | 0.989411135 |
| ZMYND8       | 1.653533001  | 0.101818736 | 1.110834411  | 0.27125546  | 0.954435638  | 0.343947909 |
| ZNF10        | 0.513913448  | 0.608612535 | -0.66236555  | 0.51037877  | -0.50462328  | 0.615795113 |
| ZNF100       | -0.516188853 | 0.607029185 | -1.125547922 | 0.265025235 | -1.222457622 | 0.226633416 |
| ZNF101       | 1.024330176  | 0.308512974 | 2.012365964  | 0.048865705 | 3.248858063  | 0.001957553 |
| ZNF107       | 0.006921817  | 0.994493046 | -0.401116569 | 0.689818566 | -1.646792166 | 0.10517829  |
| ZNF117       | 0.299363494  | 0.765375164 | -1.356414918 | 0.180260557 | -2.96636453  | 0.004417383 |
| ZNF12        | 0.694171443  | 0.489420196 | -0.909500118 | 0.366876504 | -1.545378175 | 0.127864095 |
| ZNF121       | 0.028673793  | 0.977190289 | 0.100024179  | 0.920672478 | -0.08368984  | 0.933600235 |
| ZNF124       | 1.955446517  | 0.053732995 | -0.985729178 | 0.328388898 | -1.346055102 | 0.183685979 |
| ZNF131       | 1.885906654  | 0.062636957 | -0.313298367 | 0.75518574  | -0.602374905 | 0.549345879 |
| ZNF132       | -0.188142909 | 0.851201823 | 2.555452276  | 0.013268544 | 2.253172268  | 0.028166575 |
| ZNF133       | 1.12756772   | 0.262595981 | 0.404756754  | 0.687155627 | 1.645088219  | 0.105530419 |
| ZNF134       | 0.941746966  | 0.348924251 | 0.261289939  | 0.794800991 | 1.735648571  | 0.088102838 |
| ZNF135       | 0.951099825  | 0.34418282  | 0.228694984  | 0.819916058 | 0.989994325  | 0.326417455 |
| ZNF136       | 0.300983342  | 0.764143793 | 0.322654348  | 0.748125397 | 0.580935799  | 0.563604756 |
| ZNF137P      | -0.337950039 | 0.736213195 | -1.64828341  | 0.104739474 | -0.553690783 | 0.581985368 |
| ZNF138       | 1.110179284  | 0.269974215 | -0.171171001 | 0.864689247 | -0.99339076  | 0.324774749 |
| ZNF14        | 0.568942811  | 0.570857648 | 0.127566081  | 0.898936718 | 0.213770342  | 0.831499312 |
| ZNF140       | 1.037452991  | 0.302393475 | -0.979703498 | 0.331329818 | -0.637278393 | 0.526529562 |
| ZNF141       | 0.756453989  | 0.451416201 | -0.256733223 | 0.798299594 | -0.140266273 | 0.888950797 |
| ZNF142       | 1.042337768  | 0.300136701 | -0.474956773 | 0.636613895 | 0.160181807  | 0.87331184  |
| ZNF143       | -0.353801065 | 0.724342096 | -1.237711531 | 0.220844908 | -1.12294568  | 0.266231825 |
| ZNF146       | 1.509143349  | 0.134877578 | 0.424522375  | 0.672766488 | 0.663000614  | 0.510038662 |
| ZNF148       | -0.198192261 | 0.843356021 | -0.766077963 | 0.446758234 | -1.919968639 | 0.059939353 |
| ZNF154       | 2.650519686  | 0.009543495 | 0.328436988  | 0.743772389 | 0.914505438  | 0.364355836 |
| ZNF155       | 0.3900316    | 0.697464378 | -0.294263412 | 0.769614546 | -0.265269277 | 0.791772    |
| ZNF157       | 0.438337361  | 0.662225903 | 0.790648345  | 0.43239278  | 1.229341972  | 0.224062458 |



|         |              |             |              |              |              |             |
|---------|--------------|-------------|--------------|--------------|--------------|-------------|
| ZNF16   | 0.707013074  | 0.481443719 | 1.031264011  | 0.306728115  | 0.946578853  | 0.347903105 |
| ZNF160  | 0.090334631  | 0.928228504 | 2.034222522  | 0.046543069  | 2.335242976  | 0.023123832 |
| ZNF165  | -1.137655693 | 0.258380972 | 1.642615946  | 0.105911515  | 2.292610892  | 0.025633002 |
| ZNF167  | -1.22519537  | 0.223801149 | -3.056399731 | 0.003392722  | -2.587226722 | 0.012287151 |
| ZNF169  | 2.694730684  | 0.008450752 | -2.368553154 | 0.021234299  | -2.677666081 | 0.00969997  |
| ZNF17   | 3.224945323  | 0.001774188 | 0.266796215  | 0.2790578976 | 1.17759155   | 0.243919086 |
| ZNF174  | -0.610119317 | 0.543369734 | 1.097601556  | 0.796946047  | 0.890709982  | 0.376879688 |
| ZNF175  | 0.537819199  | 0.592072049 | -0.466235537 | 0.642805473  | -0.659918453 | 0.51199995  |
| ZNF18   | -0.408389755 | 0.683988806 | 2.54999062   | 0.01345629   | 3.898944621  | 0.00025996  |
| ZNF180  | -0.262362809 | 0.793660641 | -0.218140799 | 0.828090449  | -0.505777847 | 0.614989459 |
| ZNF181  | 1.429648003  | 0.156391574 | -0.627372091 | 0.532894686  | -0.529090047 | 0.598825279 |
| ZNF182  | -0.581056182 | 0.562701637 | 2.102394498  | 0.039901015  | 3.086321559  | 0.003142706 |
| ZNF184  | 1.224611507  | 0.22402006  | -1.337486404 | 0.186321707  | -0.66875962  | 0.506384846 |
| ZNF185  | -4.012969897 | 0.00012642  | 1.117248037  | 0.268527152  | -0.654260341 | 0.515610897 |
| ZNF187  | 1.37230455   | 0.173488837 | -1.149344043 | 0.255164522  | -0.508603446 | 0.613019773 |
| ZNF189  | -0.283528803 | 0.777443658 | 0.558072656  | 0.578957695  | 0.761589689  | 0.449487036 |
| ZNF19   | 0.405420562  | 0.686161517 | 1.770559853  | 0.081925745  | 1.55133013   | 0.126432544 |
| ZNF192  | 0.8335405    | 0.406817684 | -1.639609238 | 0.106537628  | -1.535498907 | 0.130268774 |
| ZNF193  | 0.543051421  | 0.588480034 | -0.135203176 | 0.892922635  | 0.523309076  | 0.602815214 |
| ZNF195  | 1.117538241  | 0.266834202 | -0.086927096 | 0.931030967  | 0.529736564  | 0.598379829 |
| ZNF197  | 0.650831173  | 0.516867011 | -0.464201619 | 0.644253129  | -0.895363909 | 0.374409048 |
| ZNF2    | 1.806557933  | 0.074281216 | 1.660198135  | 0.102309943  | 2.248674379  | 0.028469161 |
| ZNF200  | -2.467095182 | 0.015576564 | 0.169617853  | 0.865905028  | -0.494267385 | 0.62304261  |
| ZNF202  | 1.317270055  | 0.191199455 | 0.069481691  | 0.944846878  | 1.467117092  | 0.14791464  |
| ZNF204P | 1.255508466  | 0.212648596 | -0.889297215 | 0.377542636  | -0.407280608 | 0.685348076 |
| ZNF205  | 0.115128154  | 0.908608274 | 1.9199183    | 0.059825429  | 1.986473973  | 0.051861765 |
| ZNF207  | 0.597648997  | 0.551623289 | -1.4829194   | 0.14354727   | -1.898009962 | 0.062831696 |
| ZNF208  | 0.569025557  | 0.570801741 | 0.496580987  | 0.621374585  | -1.72333407  | 0.090322798 |
| ZNF211  | 1.679239519  | 0.09668575  | 1.006153565  | 0.3185501    | 2.69230974   | 0.009331374 |
| ZNF212  | 0.428950427  | 0.669017306 | 3.165544924  | 0.002474003  | 4.233847016  | 8.58E-05    |
| ZNF213  | -1.61796095  | 0.109283238 | -0.893184696 | 0.375475136  | -1.716877514 | 0.09150508  |
| ZNF217  | -0.703307017 | 0.483738293 | -0.066376772 | 0.947307732  | -2.602169609 | 0.011820415 |
| ZNF219  | -0.428624023 | 0.669253959 | -1.16030343  | 0.250712247  | -0.642846981 | 0.52293588  |
| ZNF22   | 1.132411122  | 0.260566294 | -1.157213315 | 0.251961943  | -0.980512257 | 0.331032807 |
| ZNF221  | 0.512511702  | 0.609588876 | -0.222276399 | 0.824885028  | -0.075072839 | 0.940423177 |
| ZNF222  | -0.680865964 | 0.497760566 | 0.685139834  | 0.496003893  | 0.184467886  | 0.854310024 |
| ZNF223  | 2.068099249  | 0.041593746 | 0.000972321  | 0.99922756   | 0.164461789  | 0.869957328 |
| ZNF224  | 1.271521172  | 0.206924737 | -0.290595865 | 0.772404216  | -0.166796197 | 0.868128703 |
| ZNF225  | 1.263347694  | 0.209832034 | -0.9453746   | 0.348416864  | 0.068429402  | 0.945686546 |
| ZNF226  | 1.218318924  | 0.22638926  | -1.242350363 | 0.219141888  | -0.589073186 | 0.558171162 |
| ZNF227  | -0.134884227 | 0.89301431  | -1.531098593 | 0.131219434  | -1.008264484 | 0.317646165 |
| ZNF229  | 0.342512946  | 0.732789239 | -0.093685572 | 0.925684073  | 0.269998225  | 0.788149958 |
| ZNF23   | 1.382735804  | 0.170277193 | -0.12508121  | 0.900894813  | -0.804887763 | 0.424274333 |
| ZNF230  | -0.380836173 | 0.704251161 | -0.017077872 | 0.986433514  | -0.878192482 | 0.383575962 |
| ZNF232  | 2.225154554  | 0.028651699 | 0.358186031  | 0.72151355   | 1.509095964  | 0.136872467 |
| ZNF233  | 1.041015833  | 0.300746307 | 0.09060192   | 0.928123258  | 1.610441939  | 0.11290079  |
| ZNF234  | 0.720478998  | 0.473157352 | -0.136822605 | 0.891648162  | 1.109398334  | 0.271979987 |
| ZNF235  | 0.622530588  | 0.535217817 | -0.694245019 | 0.490319427  | -0.342616206 | 0.733164525 |
| ZNF236  | 1.63309143   | 0.106056097 | -1.14048572  | 0.258804243  | -1.579392808 | 0.119854819 |
| ZNF238  | -0.303447004 | 0.762272137 | -1.27699995  | 0.206726483  | -1.859524584 | 0.068186758 |
| ZNF239  | 1.398077442  | 0.165636326 | 0.502236359  | 0.617416036  | 0.425540798  | 0.672066599 |
| ZNF24   | -0.140607067 | 0.8885047   | -1.026452886 | 0.308969791  | -1.827530981 | 0.07292719  |
| ZNF248  | 2.423031374  | 0.017459898 | -1.226228661 | 0.225102374  | -0.167607547 | 0.867493313 |
| ZNF25   | 1.361914832  | 0.176733261 | -0.958016673 | 0.342058581  | -0.918615572 | 0.362219975 |
| ZNF250  | 1.223551496  | 0.224417893 | 1.794154004  | 0.078037605  | 2.63803951   | 0.010765203 |
| ZNF251  | 2.207686149  | 0.029891335 | 0.111573557  | 0.911549457  | 0.326595978  | 0.745185903 |
| ZNF252  | -0.46800518  | 0.640948673 | -0.342357136 | 0.733328343  | -0.584201274 | 0.561421151 |
| ZNF253  | 1.24111367   | 0.217892658 | -0.91964648  | 0.361593158  | 0.345103497  | 0.731304017 |
| ZNF254  | 0.472190418  | 0.637970582 | -0.988303913 | 0.327137574  | -1.680678907 | 0.098372179 |
| ZNF256  | 1.309507432  | 0.193802792 | 0.320110143  | 0.750043225  | 1.902102847  | 0.062283776 |
| ZNF257  | 1.142777479  | 0.256259317 | -0.392569202 | 0.696086765  | -2.155463438 | 0.035419982 |
| ZNF259  | 2.198676906  | 0.030548818 | 2.05606611   | 0.044317701  | 2.320120243  | 0.023987678 |
| ZNF26   | 1.847877871  | 0.068010659 | 0.302097088  | 0.763666248  | 0.151890484  | 0.879816916 |
| ZNF260  | 0.203679748  | 0.839078404 | -0.812476618 | 0.419863748  | -0.778427459 | 0.439580104 |
| ZNF263  | 2.476589304  | 0.015195407 | 1.647652557  | 0.104869411  | 2.604896191  | 0.011737013 |
| ZNF264  | -0.22201306  | 0.824822916 | -0.767417662 | 0.445967842  | 1.291935233  | 0.201663727 |
| ZNF266  | 2.611415462  | 0.010615184 | 1.42481916   | 0.159605775  | 2.387866058  | 0.020330346 |
| ZNF267  | -0.528593248 | 0.598430649 | 0.065378382  | 0.948099133  | -1.19694745  | 0.236348479 |
| ZNF268  | 0.245370817  | 0.806745954 | 0.541126493  | 0.590507298  | 0.758822461  | 0.45112756  |
| ZNF271  | -0.562071088 | 0.575509744 | -0.928791016 | 0.356873626  | -1.127343384 | 0.264384461 |
| ZNF273  | 0.44426096   | 0.657954659 | -1.399656579 | 0.16697934   | -1.403392023 | 0.165997659 |
| ZNF274  | -0.216250066 | 0.829297974 | -0.004332298 | 0.996558308  | 1.55544605   | 0.125450108 |

|         |              |             |              |             |              |             |
|---------|--------------|-------------|--------------|-------------|--------------|-------------|
| ZNF275  | 1.504014245  | 0.13619155  | -1.169025497 | 0.247208867 | -0.121826893 | 0.903470404 |
| ZNF276  | 0.139908285  | 0.889055148 | -1.959968687 | 0.054843763 | -1.025104765 | 0.309703097 |
| ZNF277  | 0.631326023  | 0.529479043 | 1.293848346  | 0.200882219 | 1.014819603  | 0.314538151 |
| ZNF28   | 0.361992478  | 0.718233523 | -1.721140789 | 0.090593257 | -1.128044558 | 0.264090757 |
| ZNF280B | -0.810466796 | 0.419878618 | 0.181487836  | 0.856621862 | 0.784294549  | 0.436158514 |
| ZNF280C | 0.831789259  | 0.407800249 | -2.131446222 | 0.037331251 | -2.688463114 | 0.009426935 |
| ZNF280D | 0.684537906  | 0.495451194 | -0.648112836 | 0.519487422 | -1.722322838 | 0.09050713  |
| ZNF281  | -1.492455011 | 0.139189636 | -1.099892304 | 0.275955015 | -2.108174389 | 0.039484567 |
| ZNF282  | 0.320707094  | 0.749199779 | -0.071479901 | 0.943263449 | 0.425202012  | 0.672312076 |
| ZNF283  | 1.189644635  | 0.2374156   | 1.471849087  | 0.146504882 | 0.962319664  | 0.340008748 |
| ZNF284  | 0.388646282  | 0.698485269 | 0.870939108  | 0.387403113 | 0.18393734   | 0.854724249 |
| ZNF285  | 2.549653025  | 0.012530897 | 0.475581699  | 0.636171224 | 1.339545728  | 0.185781544 |
| ZNF286A | 1.449994428  | 0.150647869 | -0.052101053 | 0.958628455 | 1.074567214  | 0.287157502 |
| ZNF286B | 0.651671641  | 0.516327143 | -0.336692774 | 0.737572235 | 0.352820459  | 0.725542049 |
| ZNF287  | 1.168888816  | 0.245634328 | -0.109170191 | 0.913446966 | 0.217514598  | 0.828594609 |
| ZNF292  | -0.04288851  | 0.965888476 | -0.684205724 | 0.496589102 | -2.129477867 | 0.037605683 |
| ZNF295  | -0.654970811 | 0.514210828 | -1.714878464 | 0.09174379  | -2.697178091 | 0.009211703 |
| ZNF296  | -0.257839398 | 0.797138462 | -1.907878122 | 0.061396383 | -2.009443886 | 0.049298054 |
| ZNF3    | 0.328161628  | 0.743576239 | 2.196608924  | 0.032087273 | 3.37927039   | 0.001326106 |
| ZNF30   | 0.97234591   | 0.333568361 | 0.960545799  | 0.340795765 | 1.850321169  | 0.069522999 |
| ZNF300  | 1.747650356  | 0.084045197 | -0.660389229 | 0.511636664 | -0.547863478 | 0.585953745 |
| ZNF302  | 1.58290536   | 0.117063863 | 0.081011801  | 0.935713418 | 0.072805369  | 0.942219328 |
| ZNF304  | 1.469215451  | 0.145373412 | 1.158606009  | 0.251398163 | 1.956801057  | 0.055342466 |
| ZNF317  | -0.926175301 | 0.35691146  | 1.017078533  | 0.313369491 | 0.975633943  | 0.333424111 |
| ZNF318  | 3.311657269  | 0.001350846 | 0.931654207  | 0.355404144 | 1.213969124  | 0.229833104 |
| ZNF319  | -1.241480911 | 0.217757705 | -0.591176314 | 0.556715338 | -1.115268075 | 0.26947882  |
| ZNF32   | 1.180401818  | 0.241050767 | 0.633626268  | 0.528833009 | 1.500890657  | 0.138977886 |
| ZNF320  | 0.894314706  | 0.37361564  | -1.106001992 | 0.273323967 | 0.008928523  | 0.992907763 |
| ZNF322  | 1.130130439  | 0.261520663 | -0.010744029 | 0.991464798 | -1.501428812 | 0.138839019 |
| ZNF323  | -0.563568452 | 0.57449449  | -0.15295579  | 0.87896774  | -0.289974566 | 0.772902221 |
| ZNF324  | -0.227674599 | 0.820432271 | -0.98833908  | 0.327120505 | -1.139820267 | 0.259192697 |
| ZNF324B | 2.664861807  | 0.009175708 | -0.519107248 | 0.605674978 | 1.244662517  | 0.218417983 |
| ZNF326  | 1.259142368  | 0.211339534 | 0.060555896  | 0.951922534 | -1.23546163  | 0.221795106 |
| ZNF329  | -1.347469971 | 0.181320142 | 1.675737523  | 0.099210659 | 2.976514214  | 0.00429324  |
| ZNF330  | 1.298590121  | 0.197508782 | 3.379505299  | 0.001308516 | 3.338751157  | 0.001498015 |
| ZNF331  | 2.839267395  | 0.005625586 | -0.750668902 | 0.455907863 | -0.051662596 | 0.958980614 |
| ZNF333  | 0.432563816  | 0.666399735 | -0.599824692 | 0.550975664 | -1.566375356 | 0.122871004 |
| ZNF335  | 1.356347278  | 0.178490678 | -2.106158395 | 0.039559621 | -0.892046164 | 0.376169292 |
| ZNF337  | 3.530915622  | 0.00066418  | 1.069045542  | 0.289509107 | 2.786326947  | 0.007254799 |
| ZNF33A  | -0.584718411 | 0.560247145 | -1.238064816 | 0.220714867 | -1.85882065  | 0.06828819  |
| ZNF33B  | 1.367500859  | 0.174983226 | -0.22900219  | 0.819678418 | 0.025948222  | 0.979390496 |
| ZNF34   | 0.382001926  | 0.703389423 | 1.157098004  | 0.252008663 | 1.410744135  | 0.163828022 |
| ZNF341  | -1.920882305 | 0.058014462 | 0.48926745   | 0.626510496 | 0.290471581  | 0.772523972 |
| ZNF343  | 1.289826664  | 0.200521597 | 2.168009718  | 0.034303354 | 3.106130121  | 0.002968701 |
| ZNF345  | 1.583944707  | 0.116826976 | -0.39454232  | 0.69463787  | -0.31137139  | 0.756669656 |
| ZNF346  | 1.312223831  | 0.192888803 | -0.980390806 | 0.330993486 | -0.783247192 | 0.436768156 |
| ZNF347  | -0.305293738 | 0.760870091 | -0.206026392 | 0.837496814 | 0.563014076  | 0.575663186 |
| ZNF35   | 0.44719019   | 0.655846701 | 0.235651278  | 0.81453919  | 0.606165734  | 0.546843779 |
| ZNF350  | -0.200302565 | 0.841710429 | 0.086265334  | 0.931554689 | 0.555512834  | 0.580747209 |
| ZNF354A | -0.333275065 | 0.739726781 | -1.631566876 | 0.108227165 | -1.201794772 | 0.234479558 |
| ZNF354B | 2.267148727  | 0.025854244 | -1.112324062 | 0.270620042 | -0.308632316 | 0.758741667 |
| ZNF354C | 0.079978259  | 0.936437836 | 0.769726604  | 0.444607537 | 0.40583644   | 0.686402828 |
| ZNF358  | -0.782542362 | 0.436016119 | -0.809683771 | 0.421454473 | -1.108306387 | 0.272447074 |
| ZNF362  | -1.040336719 | 0.301059804 | 0.310977864  | 0.756940152 | 0.623154139  | 0.535702382 |
| ZNF365  | 1.126191861  | 0.263174572 | -1.81851283  | 0.074186424 | -1.637724159 | 0.107063297 |
| ZNF366  | 0.253103887  | 0.80078375  | 0.797630157  | 0.428361369 | -0.176557914 | 0.860489959 |
| ZNF367  | -0.253298223 | 0.800634066 | -0.653624301 | 0.515954963 | -1.387961629 | 0.170623314 |
| ZNF37A  | 0.163063304  | 0.870845951 | -1.712993526 | 0.092092447 | -1.15340382  | 0.25362335  |
| ZNF37BP | 1.957680332  | 0.053465773 | -2.493923274 | 0.015527562 | -1.127658639 | 0.26425238  |
| ZNF382  | -0.522417712 | 0.602704413 | -1.472890335 | 0.146224673 | -1.289162099 | 0.202619231 |
| ZNF383  | 1.596211543  | 0.11405997  | 0.726166857  | 0.470677224 | 1.45138084   | 0.152229731 |
| ZNF384  | -1.90886975  | 0.059568474 | -1.186091131 | 0.240456198 | -0.938327957 | 0.352088541 |
| ZNF385A | -1.86728166  | 0.065222436 | -0.35045382  | 0.727276614 | -0.474484243 | 0.636991968 |
| ZNF385C | 0.305057048  | 0.761049742 | -2.004231716 | 0.049755256 | -1.163514443 | 0.24953383  |
| ZNF391  | -0.387522519 | 0.699313818 | -1.155202032 | 0.252777732 | -2.260898652 | 0.027653436 |
| ZNF394  | -1.753280407 | 0.083068487 | 1.484868979  | 0.143031309 | 1.551385684  | 0.126419243 |
| ZNF395  | 2.085321903  | 0.039963489 | 0.795976271  | 0.429314316 | 1.291216539  | 0.201911034 |
| ZNF396  | -1.381134317 | 0.170767303 | 0.66348714   | 0.509665637 | 0.396622688  | 0.693146811 |
| ZNF397  | -0.124010214 | 0.901592635 | 0.522593955  | 0.6032613   | 1.015285563  | 0.314318007 |
| ZNF398  | 0.196978767  | 0.844302607 | 1.075373678  | 0.286691642 | 1.836864675  | 0.071516433 |
| ZNF404  | 1.377286884  | 0.171949143 | 0.139039179  | 0.889904208 | 0.286716227  | 0.775383319 |
| ZNF407  | -1.844690312 | 0.068478098 | 0.591298523  | 0.556634023 | 0.986603594  | 0.328062923 |

|         |              |             |              |             |              |             |
|---------|--------------|-------------|--------------|-------------|--------------|-------------|
| ZNF408  | -1.441528663 | 0.153017531 | 1.687647484  | 0.096887653 | 1.140736373  | 0.258814373 |
| ZNF41   | 0.878918781  | 0.381861169 | 0.073462491  | 0.941692624 | -0.285197073 | 0.776540902 |
| ZNF410  | -0.956607317 | 0.34141046  | 3.274565082  | 0.001793529 | 3.198785964  | 0.002268178 |
| ZNF414  | 0.46703853   | 0.641637352 | -1.837600351 | 0.071281179 | -1.053750753 | 0.296503522 |
| ZNF415  | 0.491076501  | 0.62460617  | -0.107056253 | 0.915116386 | -0.221292971 | 0.825666015 |
| ZNF416  | -0.527850101 | 0.598944201 | 3.958441257  | 0.000209693 | 4.461054227  | 3.96E-05    |
| ZNF417  | 0.099502406  | 0.920967803 | -0.756968719 | 0.45215413  | 0.580677798  | 0.563777336 |
| ZNF418  | 1.665994551  | 0.099303538 | 1.355730789  | 0.180476974 | 3.29938154   | 0.001685077 |
| ZNF419  | 1.118040233  | 0.266620941 | 1.475448125  | 0.145538137 | 3.527661374  | 0.000842979 |
| ZNF420  | 1.538750522  | 0.127486665 | 1.158346693  | 0.251503069 | 1.219783822  | 0.22763775  |
| ZNF425  | 0.318604933  | 0.750788075 | -0.109922176 | 0.912853203 | -0.322443681 | 0.748312301 |
| ZNF426  | 2.088878395  | 0.039633795 | 3.294391119  | 0.001690525 | 3.381389468  | 0.00131765  |
| ZNF428  | 0.660045107  | 0.510964802 | -3.236719323 | 0.00200679  | -1.683235969 | 0.097873593 |
| ZNF429  | -0.179181672 | 0.858210791 | 1.512289322  | 0.135929547 | -0.148079185 | 0.882809949 |
| ZNF43   | -0.733061073 | 0.465487547 | -0.251685344 | 0.802180163 | 0.864683713  | 0.390885885 |
| ZNF430  | 0.505248417  | 0.614659184 | -0.83240584  | 0.40861813  | -1.751745191 | 0.085269375 |
| ZNF431  | 1.469001329  | 0.145431367 | -2.868054608 | 0.005762247 | -1.540362202 | 0.12908055  |
| ZNF432  | 0.506280646  | 0.613937462 | -0.283936155 | 0.777477536 | 0.172345174  | 0.863784916 |
| ZNF433  | 0.12824874   | 0.898247485 | 1.069865081  | 0.28914315  | 0.056667759  | 0.95501072  |
| ZNF434  | 1.317326207  | 0.191180719 | -0.047855146 | 0.961997241 | 0.7551748    | 0.453295346 |
| ZNF436  | 0.719726312  | 0.473618407 | 0.698986644  | 0.487373473 | 2.147976936  | 0.036037981 |
| ZNF438  | -1.178038795 | 0.241986502 | 1.059218848  | 0.293922051 | -0.186497041 | 0.85272614  |
| ZNF439  | 1.341537668  | 0.183229738 | 0.734227273  | 0.465761348 | 1.031865987  | 0.306552249 |
| ZNF44   | 2.234912905  | 0.027978998 | 2.795368864  | 0.007031491 | 4.007924994  | 0.00018209  |
| ZNF440  | 0.353197158  | 0.72479316  | 1.399780209  | 0.166942481 | 2.276405864  | 0.026648462 |
| ZNF441  | -0.351071328 | 0.726381736 | -0.393251646 | 0.695585505 | -1.024371271 | 0.310046234 |
| ZNF442  | -0.665256706 | 0.507642315 | 1.308518166  | 0.195895161 | -0.359876647 | 0.720287374 |
| ZNF443  | 0.348503442  | 0.728302245 | 0.109498853  | 0.913187451 | 0.452509198  | 0.65264303  |
| ZNF444  | 0.284951372  | 0.776357155 | -1.400661053 | 0.166680041 | 0.071807027  | 0.94301025  |
| ZNF445  | 0.505193307  | 0.166501312 | 0.815609859  | 0.41808346  | 1.49544817   | 0.140388457 |
| ZNF446  | 0.153815276  | 0.878110851 | 0.553817464  | 0.581847554 | 1.225662241  | 0.225433976 |
| ZNF449  | 2.716534861  | 0.00795487  | -1.893207914 | 0.063357735 | -0.975556062 | 0.33346238  |
| ZNF45   | 1.066660246  | 0.289070001 | 0.851029315  | 0.398277391 | 0.352278043  | 0.725946535 |
| ZNF451  | 1.791169332  | 0.076736188 | -0.398560786 | 0.691690582 | -0.828604825 | 0.14083104  |
| ZNF460  | -0.380274581 | 0.704666433 | -0.242544443 | 0.809219947 | -1.413439322 | 0.163038181 |
| ZNF461  | 1.782292883  | 0.078182611 | -0.96686795  | 0.33765248  | -0.362672792 | 0.718208842 |
| ZNF467  | -0.914725112 | 0.362858789 | -1.740310094 | 0.087145241 | -2.123902067 | 0.038089745 |
| ZNF468  | -0.026721407 | 0.978743005 | -1.356531931 | 0.18022356  | -1.933436743 | 0.058222067 |
| ZNF469  | 1.454922277  | 0.14928167  | -0.616178376 | 0.54020449  | -0.902004508 | 0.370901591 |
| ZNF470  | 0.71756864   | 0.474941474 | 0.68488951   | 0.496160661 | -0.018256053 | 0.985499203 |
| ZNF471  | 1.068127869  | 0.288411297 | -0.580310577 | 0.563968744 | 0.787863823  | 0.434084706 |
| ZNF473  | 0.618128538  | 0.538101961 | 0.300218258  | 0.7650916   | 0.315633326  | 0.753449228 |
| ZNF48   | 1.000313158  | 0.319927114 | 1.726875743  | 0.089550086 | 2.099864096  | 0.040239395 |
| ZNF480  | 0.388367511  | 0.698690773 | -2.482314843 | 0.015990819 | -1.851395495 | 0.069365888 |
| ZNF483  | 1.158772171  | 0.249713007 | -0.166263745 | 0.868531681 | 0.243560802  | 0.80845729  |
| ZNF484  | 1.276879798  | 0.205034888 | -0.97750995  | 0.332404736 | -1.816844463 | 0.07457106  |
| ZNF485  | -0.322245795 | 0.748037893 | -1.737364084 | 0.087667969 | -0.963430272 | 0.339456241 |
| ZNF486  | -1.210253521 | 0.229452461 | -0.75086712  | 0.455789481 | -1.692871286 | 0.096013455 |
| ZNF487P | -1.194851614 | 0.235385166 | -1.197506684 | 0.236014263 | -1.225108533 | 0.225640887 |
| ZNF490  | -1.690313223 | 0.094540444 | 1.555959559  | 0.125195899 | 2.174937828  | 0.033855701 |
| ZNF491  | 1.000453586  | 0.319859569 | -0.148597946 | 0.882389939 | -0.00744134  | 0.99408906  |
| ZNF493  | 0.647553779  | 0.518975055 | -1.463665983 | 0.148721722 | -1.81462383  | 0.074916525 |
| ZNF496  | 1.503997965  | 0.136195736 | 0.731263541  | 0.467582889 | 0.316229647  | 0.752998982 |
| ZNF497  | 0.641275146  | 0.5230261   | -0.147396603 | 0.883333748 | 0.723340496  | 0.472468717 |
| ZNF498  | -0.057816231 | 0.954027309 | -1.630956651 | 0.108356245 | -0.404276939 | 0.687542518 |
| ZNF500  | 0.308456451  | 0.758470806 | 1.899168144  | 0.062554557 | 2.785238904  | 0.007276177 |
| ZNF501  | 0.220798866  | 0.825765281 | -0.133508813 | 0.894256384 | -0.340785518 | 0.73453492  |
| ZNF502  | 0.864283758  | 0.389803605 | -1.545253798 | 0.127762118 | -0.095470647 | 0.924280391 |
| ZNF503  | 0.148006563  | 0.882679341 | -1.231990169 | 0.222958736 | -1.041953658 | 0.045856612 |
| ZNF506  | 1.55121575   | 0.124472427 | -0.629543202 | 0.531482859 | -0.537491536 | 0.593048727 |
| ZNF507  | 0.197794371  | 0.843666637 | -1.471179972 | 0.146685169 | -2.102684279 | 0.039981839 |
| ZNF510  | 0.192690695  | 0.847649337 | -0.486547393 | 0.628425418 | -0.548686335 | 0.585392601 |
| ZNF511  | 0.554347705  | 0.580760055 | -0.990336075 | 0.326152189 | -0.862361426 | 0.03215123  |
| ZNF512  | 1.6969613902 | 0.052057258 | 0.966410589  | 0.33787923  | 3.007254913  | 0.00393678  |
| ZNF512B | 2.844552622  | 0.005541003 | -1.056883138 | 0.29497774  | -0.665559366 | 0.508413508 |
| ZNF513  | 0.600787648  | 0.549540065 | -3.331742591 | 0.001511458 | -2.777481616 | 0.007430284 |
| ZNF514  | 3.584867715  | 0.000555266 | 0.875756651  | 0.384800049 | 0.654489034  | 0.515464685 |
| ZNF516  | -0.00762718  | 0.993931875 | -1.447261697 | 0.153244787 | -2.169967252 | 0.034249089 |
| ZNF517  | 1.890894783  | 0.061959337 | 0.536530647  | 0.593658245 | 1.091468673  | 0.279720908 |
| ZNF518A | 0.442678855  | 0.659094341 | -0.582573619 | 0.562454209 | -1.163305009 | 0.249618059 |
| ZNF518B | -0.385016403 | 0.701162887 | -0.340321114 | 0.734852831 | -1.015450258 | 0.314240221 |
| ZNF519  | 2.144270516  | 0.034794113 | -1.956096465 | 0.055309393 | -2.014561671 | 0.048741956 |

|         |              |             |              |             |              |             |
|---------|--------------|-------------|--------------|-------------|--------------|-------------|
| ZNF524  | -0.75780708  | 0.450609844 | -1.687487303 | 0.096918597 | -1.541216823 | 0.128872641 |
| ZNF525  | 0.315996734  | 0.752760202 | -1.6249077   | 0.109642535 | -0.370022595 | 0.712755559 |
| ZNF526  | 0.718217216  | 0.474543556 | 1.360469752  | 0.178981912 | 1.519256905  | 0.134300357 |
| ZNF527  | -0.133444025 | 0.894149752 | -0.828360258 | 0.410885958 | -0.558664145 | 0.578608755 |
| ZNF528  | 2.205000582  | 0.030086018 | -1.587305621 | 0.117918636 | -0.049632601 | 0.960591028 |
| ZNF529  | 2.141901491  | 0.034990079 | -1.088393314 | 0.280954847 | -0.375313228 | 0.708839398 |
| ZNF530  | 2.263468665  | 0.02608941  | 0.933759445  | 0.354326171 | 2.161464061  | 0.034931363 |
| ZNF532  | 0.977521607  | 0.331015491 | -0.677712192 | 0.500667648 | -0.447242261 | 0.656418039 |
| ZNF540  | 1.430024274  | 0.156283841 | -0.345655037 | 0.730861304 | -0.24542172  | 0.807023345 |
| ZNF541  | 1.995558057  | 0.04910371  | -1.427703403 | 0.158776982 | -0.007040377 | 0.994407554 |
| ZNF542  | -0.706778811 | 0.481588583 | -0.487460222 | 0.627782499 | 1.452593294  | 0.151893799 |
| ZNF543  | -0.876740622 | 0.38303682  | 0.277829994  | 0.782137744 | 1.575599812  | 0.120727458 |
| ZNF544  | 2.009890127  | 0.047534322 | 1.973159607  | 0.053282668 | 2.796427829  | 0.007059078 |
| ZNF546  | 2.670133171  | 0.009043798 | 0.899565725  | 0.372097073 | 1.220427268  | 0.227395761 |
| ZNF547  | 0.41837359   | 0.676702712 | 2.459263516  | 0.01694786  | 3.198819773  | 0.002267953 |
| ZNF548  | 1.259629819  | 0.211164388 | -0.733898021 | 0.465987972 | 0.676717602  | 0.501359236 |
| ZNF549  | 1.130617717  | 0.261316552 | 0.635529904  | 0.52759994  | 1.947060834  | 0.056527773 |
| ZNF550  | 0.775307072  | 0.440255988 | 0.398721404  | 0.691572878 | -0.090945184 | 0.927859313 |
| ZNF551  | 1.853962818  | 0.067125743 | 0.785152203  | 0.435582143 | 0.99558977   | 0.323714137 |
| ZNF552  | -4.290868241 | 4.59E-05    | -0.168158088 | 0.867048007 | 0.750280947  | 0.456213201 |
| ZNF554  | 2.26547286   | 0.025961104 | 2.077892155  | 0.042186747 | 3.556294012  | 0.00077151  |
| ZNF555  | -0.35703778  | 0.721926224 | 0.217459725  | 0.82861862  | 0.71193287   | 0.479449462 |
| ZNF557  | 0.121573261  | 0.903516748 | 2.07542367   | 0.042423207 | 3.813888381  | 0.000342114 |
| ZNF558  | 2.326250292  | 0.022324972 | 0.52147491   | 0.604035477 | 0.275218817  | 0.784156811 |
| ZNF559  | 2.199435522  | 0.030492972 | 2.109757114  | 0.039235591 | 2.906239117  | 0.005223926 |
| ZNF561  | -0.667983743 | 0.50590839  | -2.479506702 | 0.01610474  | -1.595929381 | 0.116109426 |
| ZNF562  | -0.411018629 | 0.682067343 | -1.222519122 | 0.226490523 | 0.595608393  | 0.553826414 |
| ZNF563  | 2.916885206  | 0.004494948 | 1.65380923   | 0.103606921 | 2.388980992  | 0.020274298 |
| ZNF564  | -1.663243449 | 0.09985443  | 3.06979897   | 0.003264826 | 3.302004543  | 0.001671957 |
| ZNF565  | 1.521091171  | 0.131855442 | 0.629411932  | 0.531568165 | 0.598984126  | 0.551588833 |
| ZNF566  | 1.851564653  | 0.067473344 | -0.581856502 | 0.56293392  | 0.147856415  | 0.882984945 |
| ZNF567  | 0.880373448  | 0.381077275 | -1.128304628 | 0.26386929  | -0.999991337 | 0.321598171 |
| ZNF568  | -0.650307311 | 0.51720366  | -0.20616481  | 0.837389201 | 1.232939293  | 0.222727587 |
| ZNF569  | 0.861468961  | 0.391342836 | 0.820940691  | 0.415065021 | 0.590160454  | 0.557447144 |
| ZNF57   | 0.436025613  | 0.663895848 | 0.256032762  | 0.798837772 | 1.280186423  | 0.205735088 |
| ZNF570  | 0.89525052   | 0.373118089 | 0.489254138  | 0.626519861 | -0.605759911 | 0.547111361 |
| ZNF571  | 0.805596594  | 0.422667121 | -1.010407015 | 0.316526314 | -0.048208148 | 0.961721158 |
| ZNF572  | -0.730928443 | 0.466782593 | -0.654927065 | 0.515121855 | -0.087821733 | 0.930330346 |
| ZNF573  | 1.632229941  | 0.106237754 | -0.558785898 | 0.578473984 | -0.074317557 | 0.941021432 |
| ZNF574  | -0.16381246  | 0.870257918 | -0.250783511 | 0.80287398  | 0.32171836   | 0.748858857 |
| ZNF575  | 0.177979363  | 0.859152047 | -2.528649335 | 0.014213215 | -2.48984519  | 0.015761912 |
| ZNF576  | 0.288712447  | 0.773486738 | -1.76767406  | 0.082412187 | -2.378007344 | 0.020829252 |
| ZNF577  | 0.599096656  | 0.550661941 | -0.252876517 | 0.801263991 | 0.438572752  | 0.662651421 |
| ZNF578  | 1.421527269  | 0.158730649 | 0.541131083  | 0.590504155 | 1.96196117   | 0.054723185 |
| ZNF579  | -0.321600933 | 0.748524763 | -2.031364389 | 0.046841273 | -2.414618494 | 0.019029065 |
| ZNF580  | 1.494597089  | 0.138630182 | -2.614299233 | 0.011391273 | -1.259523559 | 0.213043712 |
| ZNF581  | -0.424172045 | 0.672485097 | 0.960490832  | 0.340823178 | 0.534444584  | 0.595140667 |
| ZNF582  | 0.896607302  | 0.372397462 | -0.345678993 | 0.730843394 | 0.437385294  | 0.663507088 |
| ZNF583  | 0.156947696  | 0.875648938 | -1.627711298 | 0.109044827 | -0.20160467  | 0.84005327  |
| ZNF584  | 2.127535902  | 0.036199049 | 0.338959552  | 0.735872909 | -0.132441554 | 0.895107792 |
| ZNF585A | 0.084146709  | 0.933132694 | -2.671360513 | 0.009805263 | -3.017718038 | 0.003821885 |
| ZNF585B | -0.905146505 | 0.367882199 | -1.86787687  | 0.066869465 | -0.346796656 | 0.730038451 |
| ZNF586  | -0.641941259 | 0.522595535 | -0.016762634 | 0.986683911 | -0.002350886 | 0.998132585 |
| ZNF587  | -1.870050483 | 0.064832498 | 0.482559051  | 0.631237858 | 1.77675528   | 0.081017272 |
| ZNF589  | 2.429441288  | 0.017173874 | 0.489371486  | 0.626437306 | 2.598167992  | 0.011943795 |
| ZNF592  | -2.142762053 | 0.034918783 | 0.454064605  | 0.651488796 | 0.196229694  | 0.845137772 |
| ZNF593  | 1.333360112  | 0.185886874 | 0.547126051  | 0.586405883 | 0.312259888  | 0.755997924 |
| ZNF594  | 1.269294665  | 0.20771374  | -0.948788254 | 0.346692428 | -1.554273548 | 0.12572935  |
| ZNF595  | -0.376313003 | 0.707598386 | -0.258308281 | 0.797089806 | 0.000571242  | 0.999546236 |
| ZNF596  | 0.334781188  | 0.738594211 | -0.459854051 | 0.647352183 | -0.896490306 | 0.373812625 |
| ZNF597  | 0.242714523  | 0.808796617 | -2.799218631 | 0.006958275 | -2.721665637 | 0.008630819 |
| ZNF598  | 0.856031049  | 0.39432709  | -1.837075878 | 0.07135971  | -1.225217624 | 0.225600111 |
| ZNF599  | 0.379671704  | 0.705112334 | -0.656470234 | 0.514135939 | -1.354561291 | 0.180974736 |
| ZNF600  | 2.784300277  | 0.006578197 | -1.736997033 | 0.087733279 | 0.029056532  | 0.976922376 |
| ZNF605  | 0.959010978  | 0.340205076 | -0.879622308 | 0.382719274 | 0.070531343  | 0.944020976 |
| ZNF606  | 0.300689507  | 0.764367115 | -0.083831408 | 0.933481168 | -0.284366541 | 0.777173976 |
| ZNF607  | 1.259150477  | 0.21133662  | -0.14463621  | 0.885503033 | -0.218996015 | 0.827446023 |
| ZNF608  | -0.398137076 | 0.691502371 | -0.062931803 | 0.950038701 | -0.64416738  | 0.522085662 |
| ZNF609  | 0.850887075  | 0.39716289  | -0.451134202 | 0.653586811 | 0.05741579   | 0.954417508 |
| ZNF610  | -0.395804653 | 0.693216019 | -0.012703811 | 0.989908    | 0.620328406  | 0.537547395 |
| ZNF611  | 0.379213622  | 0.705451211 | -1.461726489 | 0.149250973 | 0.11483407   | 0.908985676 |
| ZNF613  | 0.530705366  | 0.59697218  | -1.2957333   | 0.200236149 | -0.818554998 | 0.416495492 |

|         |              |             |              |             |              |              |
|---------|--------------|-------------|--------------|-------------|--------------|--------------|
| ZNF614  | 0.235064861  | 0.814709589 | -1.78943452  | 0.078802764 | -1.70688815  | 0.09335941   |
| ZNF615  | 1.057292715  | 0.293298657 | -0.67425433  | 0.502846923 | -0.059069424 | 0.953106216  |
| ZNF616  | -0.249824046 | 0.80331109  | 0.393298567  | 0.695551046 | 1.485004662  | 0.143126822  |
| ZNF618  | -0.937029915 | 0.351331494 | 0.166657285  | 0.868223416 | 0.01984689   | 0.984235762  |
| ZNF619  | 0.262732965  | 0.79337623  | -0.685443604 | 0.495813666 | -0.147507057 | 0.883259394  |
| ZNF620  | 1.100363543  | 0.274202515 | 2.246650616  | 0.028511341 | 2.084565713  | 0.04166185   |
| ZNF621  | 1.480895226  | 0.142239316 | -0.974893529 | 0.333689898 | -0.294823893 | 0.769214065  |
| ZNF622  | -0.039271061 | 0.968764062 | 3.42639466   | 0.001134583 | 3.524263307  | 0.000851868  |
| ZNF623  | 1.625010998  | 0.107769855 | -0.213258297 | 0.831878561 | -0.170939842 | 0.864884627  |
| ZNF624  | 0.599446553  | 0.55042971  | -1.14395305  | 0.257375208 | -1.803506586 | 0.076666279  |
| ZNF625  | 0.464808559  | 0.643227264 | 0.287723625  | 0.774591058 | 0.613307917  | 0.542145444  |
| ZNF626  | 1.919289396  | 0.058218538 | -0.887922427 | 0.378275517 | -1.544128991 | 0.128166183  |
| ZNF627  | -0.54134873  | 0.589647838 | -0.28893456  | 0.773668862 | 0.123525504  | 0.902131413  |
| ZNF628  | 0.051054777  | 0.959398657 | -2.703419393 | 0.009005425 | -2.719289901 | 0.008685666  |
| ZNF629  | 0.419479233  | 0.675897701 | 1.778630651  | 0.080577971 | 2.544664896  | 0.013709857  |
| ZNF630  | 1.304033546  | 0.195654414 | 0.149946476  | 0.881330699 | 0.087472692  | 0.930606523  |
| ZNF638  | 0.758041586  | 0.450470178 | 2.843110711  | 0.006171771 | 1.954725467  | 0.05559325   |
| ZNF639  | 1.788606393  | 0.077151524 | -0.893636664 | 0.375235231 | -0.209079278 | 0.83514186   |
| ZNF641  | -0.048723564 | 0.961251036 | 0.739344141  | 0.462700734 | 0.55066355   | 0.584045295  |
| ZNF642  | 1.831408479  | 0.07045482  | -1.64796554  | 0.104804929 | -0.281548421 | 0.779323224  |
| ZNF643  | 1.17033252   | 0.245056173 | -0.814188481 | 0.418890512 | -0.746984368 | 0.458184814  |
| ZNF644  | 0.665659715  | 0.507385872 | -0.53270524  | 0.596286981 | -1.112165033 | 0.270799037  |
| ZNF646  | -0.715666109 | 0.476112886 | -0.599256812 | 0.551351632 | -0.661285504 | 0.511129549  |
| ZNF649  | 2.084902365  | 0.040002536 | -1.224120304 | 0.225890577 | -0.641458305 | 0.523830848  |
| ZNF652  | -1.365549959 | 0.175592919 | 0.741220907  | 0.461571014 | 0.906968646  | 0.368293339  |
| ZNF653  | -1.128418733 | 0.262238552 | -0.885318328 | 0.379666189 | -0.584486608 | 0.56123055   |
| ZNF654  | 0.03934632   | 0.968704232 | -0.306615731 | 0.760241607 | -1.228588295 | 0.22434287   |
| ZNF655  | 1.137308498  | 0.258525242 | -2.857347946 | 0.005934847 | -2.908971892 | 0.005184484  |
| ZNF658  | -1.145142228 | 0.255283906 | 0.468411735  | 0.641258088 | 0.634277842  | 0.52847132   |
| ZNF662  | 0.88891131   | 0.376496661 | -0.296349929 | 0.768028827 | 0.132805403  | 0.262102665  |
| ZNF664  | 0.8164998    | 0.41643963  | -0.742173866 | 0.460997986 | -0.460533661 | 0.646909145  |
| ZNF665  | 1.209418268  | 0.229771392 | 0.153753396  | 0.878341633 | 2.558574579  | 0.013229254  |
| ZNF667  | 1.246715292  | 0.21584084  | -0.2108254   | 0.833767639 | 1.259058641  | 0.213210344  |
| ZNF668  | -0.240863279 | 0.810226571 | -1.633582323 | 0.107801731 | -1.081249603 | 0.284201047  |
| ZNF669  | 1.129989817  | 0.261579588 | 2.009413204  | 0.049187019 | 1.987505299  | 0.051744247  |
| ZNF670  | -0.548442005 | 0.584790046 | -0.901186822 | 0.371241967 | -0.817097767 | 0.417320752  |
| ZNF671  | 1.876467616  | 0.063936283 | 1.571132893  | 0.1216296   | 2.846956316  | 0.006151093  |
| ZNF672  | -0.106099922 | 0.915746806 | 0.284100172  | 0.777352471 | 0.479150404  | 0.63368962   |
| ZNF673  | 1.571697846  | 0.119642711 | 0.265982365  | 0.791202613 | 0.533861976  | 0.5955541061 |
| ZNF674  | -1.056067785 | 0.293854717 | -1.768126461 | 0.08233577  | -1.743613552 | 0.086691177  |
| ZNF675  | -0.00055007  | 0.999562364 | -0.313318678 | 0.75517039  | -0.331727037 | 0.741328514  |
| ZNF677  | 2.140223772  | 0.035129439 | 0.539372521  | 0.591708902 | 0.689951095  | 0.493062459  |
| ZNF678  | 1.271872206  | 0.206800544 | -0.875936253 | 0.384703217 | -1.498291372 | 0.139650159  |
| ZNF680  | -0.017686892 | 0.985929049 | 0.113463484  | 0.910057681 | -1.02132649  | 0.311473374  |
| ZNF681  | 1.636880656  | 0.105260056 | -0.705618835 | 0.483269423 | -0.652333236 | 0.516843846  |
| ZNF682  | 1.74655727   | 0.084235919 | 0.751706927  | 0.455288122 | 1.11069916   | 0.271424287  |
| ZNF683  | -0.607125145 | 0.545345726 | -2.374588624 | 0.02092152  | -0.6143059   | 0.541490591  |
| ZNF684  | -0.317430919 | 0.751675573 | -1.502272186 | 0.13848998  | -1.740018514 | 0.087325999  |
| ZNF687  | -2.024805754 | 0.045946785 | -0.320311336 | 0.749891508 | 0.309118347  | 0.758373872  |
| ZNF688  | 0.223482619  | 0.8236827   | 4.891163624  | 8.42E-06    | 4.27831415   | 7.39E-05     |
| ZNF689  | -0.610457692 | 0.543146653 | -0.588400018 | 0.558564205 | -1.142313265 | 0.258164085  |
| ZNF69   | 2.242218749  | 0.027484468 | 1.504251953  | 0.137980666 | 2.634718063  | 0.010859172  |
| ZNF691  | 0.528109667  | 0.598764805 | 1.604500416  | 0.114073696 | 3.349951235  | 0.001448498  |
| ZNF692  | 0.708520466  | 0.480512157 | 0.375191822  | 0.708895934 | 1.383443054  | 0.171996474  |
| ZNF696  | 2.302055411  | 0.023714741 | -1.633016897 | 0.107920947 | -1.500382737 | 0.139109052  |
| ZNF697  | -1.437311095 | 0.15420879  | 0.631225616  | 0.530390161 | -0.218421559 | 0.82789137   |
| ZNF699  | 0.847638632  | 0.39896014  | 0.555607805  | 0.580630824 | 0.097556987  | 0.922630953  |
| ZNF7    | 2.350177939  | 0.021021897 | -0.601209203 | 0.550059586 | 0.65063076   | 0.517934383  |
| ZNF70   | 3.362790791  | 0.001147726 | 1.318116342  | 0.192682979 | 1.688736611  | 0.096808083  |
| ZNF700  | 1.646139111  | 0.103335321 | -0.261325909 | 0.794773391 | -0.331337648 | 0.741621013  |
| ZNF701  | -0.485462433 | 0.628566034 | -2.412325561 | 0.019057609 | -2.877661478 | 0.005653383  |
| ZNF702P | -0.063528141 | 0.949491371 | -1.23076884  | 0.223411889 | -1.009953697 | 0.316843279  |
| ZNF703  | -0.44818661  | 0.655130282 | -3.207627668 | 0.002186719 | -2.996970325 | 0.004052846  |
| ZNF704  | -1.2623287   | 0.210196588 | 1.775678198  | 0.081068854 | 1.084039884  | 0.28297284   |
| ZNF706  | -0.900145017 | 0.370522606 | -2.015252267 | 0.048553373 | -1.476764533 | 0.145317006  |
| ZNF707  | 1.1057182    | 0.271890232 | 0.022380874  | 0.982221495 | 0.65671636   | 0.514041827  |
| ZNF708  | 0.271257714  | 0.786834021 | -0.519963476 | 0.605081842 | -0.189854335 | 0.8501069    |
| ZNF709  | 0.735245491  | 0.464163162 | -0.404315625 | 0.687478119 | -1.041764321 | 0.301978914  |
| ZNF71   | 1.150054718  | 0.253266002 | -0.496047261 | 0.621748757 | -0.768950289 | 0.445140327  |
| ZNF710  | -0.963125169 | 0.338148345 | -0.6971564   | 0.488509434 | -0.781523737 | 0.437772437  |
| ZNF711  | -0.499216271 | 0.618884365 | -0.560377998 | 0.577394947 | -1.056861994 | 0.295093526  |
| ZNF713  | -0.560416074 | 0.57663289  | -1.277842871 | 0.206431117 | 0.133374959  | 0.89437298   |

|         |              |             |              |             |               |             |
|---------|--------------|-------------|--------------|-------------|---------------|-------------|
| ZNF714  | 0.979273417  | 0.330154345 | -1.938838722 | 0.057425934 | -3.045214263  | 0.003534689 |
| ZNF717  | 1.23350119   | 0.220703843 | 0.226735697  | 0.821432071 | -0.655578058  | 0.514768733 |
| ZNF718  | 0.412336373  | 0.681104982 | -0.346887553 | 0.729940036 | -0.702384007  | 0.485336929 |
| ZNF720  | 1.835590753  | 0.069827302 | -0.720451495 | 0.474160931 | -1.087550165  | 0.28143296  |
| ZNF721  | 0.824382682  | 0.411971726 | 0.363539508  | 0.717532893 | -0.053243117  | 0.95772689  |
| ZNF736  | 1.60339855   | 0.112463351 | -0.007392824 | 0.99412698  | -1.260687331  | 0.212627026 |
| ZNF737  | 0.533137036  | 0.595295093 | -0.151147038 | 0.880387869 | -1.33384495   | 0.187631663 |
| ZNF738  | 1.660605385  | 0.100385012 | -1.946652345 | 0.056459233 | -1.326198621  | 0.190135069 |
| ZNF74   | 1.1042569    | 0.272519909 | 0.117009096  | 0.907259907 | 1.788037622   | 0.07915776  |
| ZNF740  | 0.668853785  | 0.505355861 | 0.896957993  | 0.373475242 | 1.906418681   | 0.061710412 |
| ZNF746  | -1.183314901 | 0.239900784 | -0.653178553 | 0.516240179 | -1.236110811  | 0.221555576 |
| ZNF747  | 0.803850941  | 0.423669299 | -1.462404062 | 0.149065909 | -0.950245542  | 0.346053569 |
| ZNF749  | 0.788355361  | 0.432627124 | 0.191704355  | 0.848648039 | 0.953146749   | 0.344594722 |
| ZNF750  | 0.432208041  | 0.666657279 | 0.617574109  | 0.539290236 | 0.206458893   | 0.837178141 |
| ZNF75A  | 2.001978938  | 0.048395224 | -1.373494399 | 0.174921558 | -0.40311422   | 0.688392713 |
| ZNF75D  | 1.475749488  | 0.143613534 | -0.61215066  | 0.542847238 | -0.981765543  | 0.330420302 |
| ZNF76   | 3.06162677   | 0.002926642 | -0.909687581 | 0.366778444 | 0.380474446   | 0.705026629 |
| ZNF761  | 1.242314422  | 0.217451638 | 0.323956773  | 0.747144243 | 0.803732246   | 0.424935984 |
| ZNF763  | 0.797369712  | 0.427402525 | 0.106343523  | 0.915679329 | 0.221646228   | 0.825392182 |
| ZNF764  | 1.554890553  | 0.123594691 | -3.253111387 | 0.001911644 | -0.2709054719 | 0.008925637 |
| ZNF765  | -0.109184683 | 0.913306909 | -1.514605306 | 0.135341259 | -1.576388737  | 0.120545534 |
| ZNF766  | 0.371772952  | 0.710963896 | 0.425961549  | 0.671723493 | 1.558165731   | 0.124804301 |
| ZNF767  | 2.949895156  | 0.004080873 | -0.814122657 | 0.41892791  | 1.823926201   | 0.073478265 |
| ZNF768  | -0.090500231 | 0.928097296 | 0.76968361   | 0.444632844 | 0.366295473   | 0.715519083 |
| ZNF77   | 0.685749014  | 0.494690777 | 1.845635206  | 0.070087157 | 2.043933577   | 0.045653902 |
| ZNF770  | 0.084742425  | 0.932660449 | 0.115689413  | 0.908301107 | -0.637781959  | 0.526204054 |
| ZNF771  | 0.598335856  | 0.551167061 | -1.821384529 | 0.073743086 | -1.638781263  | 0.106842147 |
| ZNF772  | 0.61084445   | 0.542891731 | -0.076422387 | 0.939347906 | -0.272475925  | 0.786254085 |
| ZNF773  | 0.456906635  | 0.648874484 | 1.764042924  | 0.083027678 | 2.89239726    | 0.005428012 |
| ZNF775  | 0.076312027  | 0.939345695 | -0.372721981 | 0.710723477 | -1.122623057  | 0.266367709 |
| ZNF776  | -0.532049612 | 0.596044803 | -2.975933778 | 0.004264556 | -1.918142474  | 0.060175491 |
| ZNF777  | 0.197904766  | 0.843580261 | 0.918255853  | 0.362314368 | 1.162824335   | 0.24981145  |
| ZNF778  | 1.327243086  | 0.187893352 | 1.22753268   | 0.22461588  | 1.369185538   | 0.176384908 |
| ZNF780A | 0.438158401  | 0.662355118 | -1.278364493 | 0.206248495 | -1.144093452  | 0.25743136  |
| ZNF780B | 1.149085201  | 0.253663353 | -1.088579394 | 0.280873439 | -0.723985369  | 0.472075819 |
| ZNF781  | 0.796914378  | 0.42766553  | -0.580860296 | 0.563600661 | -0.804016046  | 0.424773422 |
| ZNF782  | 0.425717656  | 0.671362629 | -2.477196369 | 0.016199015 | -3.106888796  | 0.00296222  |
| ZNF783  | 2.5411097    | 0.012819096 | 0.463503117  | 0.644750612 | 1.714157445   | 0.092006971 |
| ZNF784  | -0.964591661 | 0.337417197 | -1.341070554 | 0.185162305 | -0.67204438   | 0.504307168 |
| ZNF785  | 2.424857952  | 0.017377962 | -0.351742938 | 0.726314682 | 0.402982726   | 0.688488889 |
| ZNF786  | 1.208944153  | 0.22995257  | -0.497855182 | 0.620481709 | -0.674527662  | 0.502739512 |
| ZNF787  | -0.936324087 | 0.351692617 | -2.436240788 | 0.017954892 | -2.950780114  | 0.004614515 |
| ZNF788  | -0.743857446 | 0.458962684 | 0.210219636  | 0.834238152 | 1.217575348   | 0.228469751 |
| ZNF789  | 2.521180731  | 0.013514698 | 1.051448418  | 0.297444193 | 3.25544989    | 0.001919783 |
| ZNF79   | 0.178144597  | 0.859022677 | 0.248151126  | 0.804900091 | 1.471441213   | 0.146745873 |
| ZNF790  | 1.072700181  | 0.286365737 | 0.137702305  | 0.890955968 | 0.458674242   | 0.648235896 |
| ZNF791  | 0.254551995  | 0.799668557 | -0.320493982 | 0.749753785 | -1.156697493  | 0.252285903 |
| ZNF792  | 1.77716953   | 0.079027693 | 1.146317443  | 0.256403967 | 1.464920252   | 0.148511217 |
| ZNF793  | 0.204442396  | 0.838484283 | 0.367071502  | 0.714910921 | 1.228965279   | 0.224202577 |
| ZNF799  | 1.318490285  | 0.190792621 | -0.252442937 | 0.80159744  | 0.174352644   | 0.862214484 |
| ZNF8    | 0.687724371  | 0.493451875 | 0.122447093  | 0.902971192 | 0.791704189   | 0.431859937 |
| ZNF80   | 1.482381622  | 0.141844278 | -1.794785383 | 0.077935713 | -1.508956569  | 0.136980823 |
| ZNF800  | 0.621882841  | 0.535641711 | -1.33896657  | 0.185842236 | -1.571649993  | 0.121641596 |
| ZNF804A | -0.357993814 | 0.721213182 | -2.115377468 | 0.038734159 | -3.136085354  | 0.002722627 |
| ZNF805  | -0.908413736 | 0.366163802 | -1.74245744  | 0.086765854 | -0.439934549  | 0.661670684 |
| ZNF808  | 1.019090756  | 0.310979364 | -1.593455755 | 0.116531583 | -1.312481502  | 0.19468923  |
| ZNF81   | -1.802781309 | 0.074877581 | -1.413568066 | 0.162870926 | -1.678391127  | 0.098820022 |
| ZNF813  | -0.119955954 | 0.904794023 | 0.382388142  | 0.703580894 | 0.870198968   | 0.38789101  |
| ZNF814  | 0.627633278  | 0.531884574 | 1.140535136  | 0.258783838 | 2.453110016   | 0.017288203 |
| ZNF815  | 3.446392806  | 0.00087627  | 0.565960511  | 0.573619133 | 1.298704554   | 0.199345481 |
| ZNF816  | 0.591587249  | 0.555657808 | -1.359711947 | 0.17922035  | -1.250214483  | 0.216398608 |
| ZNF821  | 1.099944305  | 0.274384128 | 1.531596906  | 0.131096473 | 2.334013294   | 0.023193024 |
| ZNF823  | 1.359650006  | 0.177446572 | 0.554831423  | 0.581158309 | -0.523966475  | 0.602360869 |
| ZNF827  | 0.407513389  | 0.684629813 | -0.711802322 | 0.47946044  | -1.15028091   | 0.25489613  |
| ZNF828  | -0.038216096 | 0.969602755 | 0.912318095  | 0.365404215 | 1.102258982   | 0.275044089 |
| ZNF829  | -0.614396243 | 0.540553495 | -2.006848934 | 0.049467532 | -0.920543526  | 0.36122088  |
| ZNF83   | 1.776392616  | 0.0791565   | -0.870672094 | 0.387547711 | 0.026005398   | 0.979345094 |
| ZNF830  | 0.116732691  | 0.907340351 | -0.966079906 | 0.338043239 | -0.661171812  | 0.511201906 |
| ZNF831  | 2.102937111  | 0.038353414 | -1.321364147 | 0.191605091 | -0.914783958  | 0.364210846 |
| ZNF835  | -0.22794349  | 0.820223882 | -0.517785429 | 0.606591168 | 0.090185187   | 0.928460499 |
| ZNF836  | 0.572572284  | 0.5684079   | -2.295710187 | 0.025352239 | -0.319345599  | 0.750647722 |
| ZNF837  | 0.656034375  | 0.513529563 | -1.417955891 | 0.161591449 | -1.34968144   | 0.182526373 |

|           |              |             |              |             |              |             |
|-----------|--------------|-------------|--------------|-------------|--------------|-------------|
| ZNF839    | 0.744729652  | 0.458437845 | 0.704861951  | 0.483736813 | 2.41930101   | 0.018809191 |
| ZNF84     | 2.065848843  | 0.041810939 | -0.100490413 | 0.920303977 | 0.269946488  | 0.78818956  |
| ZNF841    | 2.257472021  | 0.026476642 | -1.341966113 | 0.184873466 | 0.287147832  | 0.775054533 |
| ZNF844    | -2.813312448 | 0.006058413 | -0.720024342 | 0.474421877 | -0.130998725 | 0.896243823 |
| ZNF845    | -0.8786828   | 0.38198843  | 0.040291799  | 0.967999834 | -0.049400537 | 0.960775137 |
| ZNF846    | 2.7041109    | 0.008234073 | 0.77927212   | 0.439009677 | 1.134809246  | 0.261269058 |
| ZNF85     | 0.77899371   | 0.438092624 | -1.057326344 | 0.29477722  | -1.542691646 | 0.126514479 |
| ZNF850    | 1.425216071  | 0.157664818 | -0.685795183 | 0.495593549 | 0.832712537  | 0.408529372 |
| ZNF853    | 0.400733452  | 0.689596685 | 1.128107279  | 0.263951924 | 1.856862833  | 0.06857097  |
| ZNF860    | 0.094111633  | 0.925236419 | 0.236460075  | 0.813914606 | 0.346621443  | 0.730169381 |
| ZNF862    | 3.508659646  | 0.000714753 | 0.406033622  | 0.686222489 | 2.336179311  | 0.02307127  |
| ZNF865    | -0.561256732 | 0.576062261 | -3.137194354 | 0.002687128 | -2.655429247 | 0.010285227 |
| ZNF876P   | 1.592158319  | 0.114968383 | -2.177394802 | 0.033561763 | -2.352236448 | 0.022186313 |
| ZNF879    | 1.979471023  | 0.050917754 | -0.723491111 | 0.472306374 | -0.869884032 | 0.388061637 |
| ZNF880    | 1.83099728   | 0.07051677  | 0.019915539  | 0.984179582 | -0.841640293 | 0.403554159 |
| ZNF883    | 1.278724681  | 0.204387208 | -0.593015044 | 0.555492527 | -2.332874076 | 0.023257291 |
| ZNF890P   | 2.922618789  | 0.004420355 | -0.425432208 | 0.67210704  | -0.729901506 | 0.468479969 |
| ZNF90     | 0.468752909  | 0.640416178 | -1.505806428 | 0.137581801 | -1.456012134 | 0.150949669 |
| ZNF91     | 2.141636518  | 0.035012057 | -0.948657408 | 0.346758423 | -1.570402087 | 0.121931561 |
| ZNF92     | 0.439854317  | 0.661131021 | -0.497385736 | 0.6208106   | -1.118414985 | 0.268144577 |
| ZNF93     | -0.166295826 | 0.868309183 | -0.730748884 | 0.467894825 | -0.445081945 | 0.657969034 |
| ZNFX1     | -2.137997832 | 0.035315081 | 1.010827543  | 0.316326699 | 0.208471085  | 0.835614381 |
| ZNFX1-AS1 | 0.504024882  | 0.615515157 | -2.337497896 | 0.022910691 | -2.294943212 | 0.025489715 |
| ZNHIT1    | -0.9311585   | 0.354342761 | 1.206090046  | 0.232713815 | 1.123545002  | 0.26597953  |
| ZNHIT2    | 0.314731226  | 0.753717679 | 0.279925523  | 0.780537527 | 0.385627253  | 0.701227648 |
| ZNHIT3    | 1.015942199  | 0.312467855 | 0.003897702  | 0.99690356  | 0.084695485  | 0.932804282 |
| ZNHIT6    | 1.577026551  | 0.118410986 | 0.052160932  | 0.95858095  | 1.904425646  | 0.06197463  |
| ZNRD1     | 0.519428855  | 0.604777852 | 0.319490208  | 0.750510774 | 0.775697283  | 0.441177677 |
| ZNRD1-AS1 | 1.047023127  | 0.297982817 | 0.832111637  | 0.408782793 | 0.549949912  | 0.584531409 |
| ZNRF1     | -1.570942568 | 0.119818116 | 2.286144326  | 0.025942652 | 0.686625865  | 0.495140092 |
| ZNRF2     | 0.857216866  | 0.393675138 | -0.617681058 | 0.539220213 | -2.703776456 | 0.009051751 |
| ZNRF3     | 1.087845519  | 0.279661339 | -0.263381372 | 0.793196621 | -1.444861005 | 0.154046135 |
| ZP3       | 0.334744953  | 0.738621453 | 1.887883445  | 0.064082619 | 2.248360053  | 0.028490414 |
| ZRANB1    | -1.824434661 | 0.071511649 | 0.35491052   | 0.723952936 | 0.905423638  | 0.369103856 |
| ZRANB2    | 1.589324328  | 0.115606972 | -0.343567741 | 0.732422404 | -0.544213847 | 0.588445681 |
| ZRANB3    | 0.886946556  | 0.37754769  | 0.052014636  | 0.958697012 | 0.915821041  | 0.363671295 |
| ZRSR2     | -0.133932496 | 0.893764621 | 0.012537702  | 0.990039951 | 1.980619763  | 0.052533194 |
| ZSCAN10   | 0.75422714   | 0.452745069 | -2.274525233 | 0.026676175 | -1.551037604 | 0.126502601 |
| ZSCAN12   | 0.294169462  | 0.769327603 | -1.407605395 | 0.164622174 | -1.931574861 | 0.058456943 |
| ZSCAN16   | 0.664169368  | 0.508334559 | -0.143188472 | 0.886641107 | -0.023034511 | 0.981704283 |
| ZSCAN18   | 1.507586511  | 0.13527535  | 0.036683779  | 0.970863989 | 2.014457025  | 0.048753273 |
| ZSCAN2    | -0.288264907 | 0.773828132 | 0.436553658  | 0.664067259 | 1.397957478  | 0.16761563  |
| ZSCAN20   | 0.120896991  | 0.904050803 | 1.311235073  | 0.194981845 | 1.529342796  | 0.131785346 |
| ZSCAN21   | -0.808709885 | 0.420883292 | 0.30414643   | 0.762112476 | 1.668608854  | 0.100753834 |
| ZSCAN22   | 1.317803424  | 0.191021546 | -0.958464718 | 0.341834644 | -0.62400831  | 0.535145312 |
| ZSCAN29   | 2.415128643  | 0.017818377 | 1.277426472  | 0.206576987 | 0.998627961  | 0.322252593 |
| ZSCAN30   | 1.847016022  | 0.068136781 | -1.64998006  | 0.104390666 | -1.858950361 | 0.06826949  |
| ZSCAN5A   | -1.35291808  | 0.179579679 | 1.114381421  | 0.26974419  | 2.68290232   | 0.009566665 |
| ZSWIM1    | -0.199910217 | 0.842016325 | -0.964466526 | 0.338844176 | -0.861311834 | 0.392723957 |
| ZSWIM3    | -0.621280118 | 0.536036295 | 1.599920324  | 0.115087823 | 0.355855405  | 0.72328031  |
| ZSWIM4    | -0.763397205 | 0.447287291 | -0.078602136 | 0.937621534 | -0.259314887 | 0.796339207 |
| ZSWIM5    | 1.235267906  | 0.220049073 | -1.319826082 | 0.192114978 | -1.554110562 | 0.125768206 |
| ZSWIM6    | -1.736324347 | 0.086038701 | -1.826357226 | 0.072980649 | -3.290964735 | 0.001727834 |
| ZSWIM7    | 2.058408504  | 0.042535993 | 1.263379751  | 0.211542824 | 2.073001204  | 0.042765947 |
| ZUFSP     | 1.113462154  | 0.268570268 | -0.280459078 | 0.780130238 | 0.074865968  | 0.940587035 |
| ZW10      | -0.892022776 | 0.374835968 | 2.673395275  | 0.009752628 | 2.960426056  | 0.004491558 |
| ZWILCH    | 1.871675849  | 0.064604509 | 0.356761155  | 0.722574349 | 0.256802982  | 0.798268079 |
| ZWINT     | 0.355407593  | 0.723142639 | 0.301424707  | 0.764176247 | 0.626431165  | 0.533566816 |
| ZXDA      | 0.576911385  | 0.565485909 | -2.312155766 | 0.024365052 | -2.548542769 | 0.013574302 |
| ZXDB      | 0.496714428  | 0.620640543 | -1.032181421 | 0.30630192  | -1.143483344 | 0.257682314 |
| ZXDC      | 1.234275339  | 0.220416758 | -0.643671574 | 0.522343248 | -0.39420052  | 0.694923891 |
| ZYG11B    | -1.609286806 | 0.111168656 | -1.543099872 | 0.128283462 | -2.684771345 | 0.00951949  |
| ZYX       | -1.926078708 | 0.057352921 | -0.127195724 | 0.899228522 | -0.272748174 | 0.786045847 |
| ZZEF1     | -0.288074492 | 0.773973399 | -0.173497022 | 0.862869088 | -0.002714729 | 0.99784357  |
| ZZZ3      | 1.885572929  | 0.062682514 | 0.812279097  | 0.419976131 | 0.325842842  | 0.745752645 |
| psiTPTE22 | -3.388469974 | 0.001056904 | 1.305139396  | 0.197035453 | -0.170293393 | 0.865390583 |
