# Supplementary material for: Meditation and vacation effects have an impact on disease-associated molecular phenotypes
Source: PubMed Central journal article supplement (PMC5022094; doi:10.1038/tp.2016.164), 2016-08-30
Supplement: tp2016164x3.pdf [file tp2016164x3.pdf]

**Supplementary Table 4.** The blood weighted coexpression network for the study described in the main text.

| <u>Gene symbol</u> | <u>Module Colors</u> |
|--------------------|----------------------|
| ABHD16B            | black                |
| ABHD8              | black                |
| ACOT2              | black                |
| ACY1               | black                |
| ADAT3              | black                |
| AKT1S1             | black                |
| ALKBH6             | black                |
| AMH                | black                |
| AMN                | black                |
| ANGPTL6            | black                |
| ANKRD16            | black                |
| ANKRD9             | black                |
| APBA3              | black                |
| ARMC8              | black                |
| ARRDC1             | black                |
| ASCL2              | black                |
| ATP6V1E1           | black                |
| BBC3               | black                |
| BBS5               | black                |
| BOP1               | black                |
| BRSK1              | black                |
| C10orf28           | black                |
| C10orf95           | black                |
| C11orf2            | black                |
| C11orf35           | black                |
| C17orf106-CDK3     | black                |
| C17orf107          | black                |
| C17orf76           | black                |
| C19orf20           | black                |
| C19orf43           | black                |
| C19orf6            | black                |
| C1orf85            | black                |
| C1QTNF4            | black                |
| C20orf134          | black                |
| C20orf201          | black                |
| C20orf24           | black                |
| C2CD4D             | black                |
| C4orf48            | black                |
| C5                 | black                |
| C8orf82            | black                |
| C9orf172           | black                |
| C9orf69            | black                |
| CACNA1A            | black                |
| CALY               | black                |
| CASKIN1            | black                |
| CBX4               | black                |
| CBY3               | black                |
| CCDC124            | black                |
| CCDC85B            | black                |
| CDK16              | black                |
| CDK2AP2            | black                |
| CEBPB              | black                |
| CEBPD              | black                |
| CENPB              | black                |
| CFD                | black                |
| CHCHD10            | black                |
| CLASRP             | black                |
| CLEC11A            | black                |
| COPB1              | black                |
| CORO1B             | black                |
| CPLX1              | black                |
| CSNK1G2            | black                |
| CTU1               | black                |
| CWC22              | black                |
| CYLD               | black                |

|              |       |
|--------------|-------|
| CYP51A1      | black |
| CYTIP        | black |
| DBNDD2       | black |
| DCAF15       | black |
| DLGAP3       | black |
| DNAJC4       | black |
| DOK2         | black |
| EGLN2        | black |
| EID2         | black |
| EPS8L2       | black |
| EXOSC6       | black |
| EXOSC9       | black |
| FAM108A1     | black |
| FAM109A      | black |
| FAM173A      | black |
| FAM43A       | black |
| FAM89B       | black |
| FBXL14       | black |
| FBXL8        | black |
| FGFBP3       | black |
| FLJ22184     | black |
| FLJ35390     | black |
| GAS2L1       | black |
| GDAP1        | black |
| GFOD1        | black |
| GJD3         | black |
| GLI4         | black |
| GLTPD2       | black |
| GMPPB        | black |
| GPAA1        | black |
| GPN1         | black |
| GPR135       | black |
| GPR150       | black |
| GPR25        | black |
| GPR27        | black |
| GRIN1        | black |
| GRIN3B       | black |
| H1FX         | black |
| H2AFX        | black |
| HCFC1R1      | black |
| HCN2         | black |
| HECA         | black |
| HES4         | black |
| HIATL2       | black |
| HIC1         | black |
| HIGD2A       | black |
| HMG20B       | black |
| HSPB1        | black |
| IDUA         | black |
| IER5         | black |
| IER5L        | black |
| INO80B       | black |
| IRF2BP1      | black |
| JUNB         | black |
| JUND         | black |
| KCNK12       | black |
| KIFC2        | black |
| KISS1R       | black |
| KLF2         | black |
| LINGO3       | black |
| LOC100128071 | black |
| LOC100131655 | black |
| LOC100133091 | black |
| LOC100134368 | black |
| LOC100286793 | black |
| LOC100506023 | black |
| LOC100630917 | black |
| LOC143666    | black |

|            |       |
|------------|-------|
| LOC144438  | black |
| LOC221442  | black |
| LOC254100  | black |
| LOC388564  | black |
| LOC389333  | black |
| LOC439994  | black |
| LOC441208  | black |
| LOC595101  | black |
| LOC642361  | black |
| LOC643988  | black |
| LOC645781  | black |
| LOXL1      | black |
| LPPR3      | black |
| LRFN4      | black |
| LRRC26     | black |
| LTB        | black |
| LTB4R2     | black |
| LTC4S      | black |
| MAB21L3    | black |
| MAST1      | black |
| MAT2B      | black |
| MBD4       | black |
| MESDC1     | black |
| METTL21A   | black |
| MEX3D      | black |
| MGAT4B     | black |
| MGC72080   | black |
| MIB2       | black |
| MMP23B     | black |
| MOSPD3     | black |
| MRPL10     | black |
| MRPL4      | black |
| MRPL41     | black |
| MTIF2      | black |
| MYPOP      | black |
| NCK2       | black |
| NDUFAF3    | black |
| NEURL      | black |
| NPAS1      | black |
| NPB        | black |
| NPEPL1     | black |
| NR2F6      | black |
| NUDT3      | black |
| NUTF2      | black |
| OAT        | black |
| OTUD7A     | black |
| OVCA2      | black |
| OXT        | black |
| PABPN1     | black |
| PCSK1N     | black |
| PDF        | black |
| PDXP       | black |
| PDZD7      | black |
| PEX10      | black |
| PGLYRP2    | black |
| PHOSPHO1   | black |
| PKP3       | black |
| PLSCR3     | black |
| PODXL2     | black |
| PPT2-EGFL8 | black |
| PRDM8      | black |
| PRR7       | black |
| PSD3       | black |
| PSMD12     | black |
| PWWP2B     | black |
| RASL10A    | black |
| RCE1       | black |
| RDH14      | black |

|          |       |
|----------|-------|
| REPIN1   | black |
| RNF126   | black |
| RPP25    | black |
| RRAS     | black |
| RTN4RL2  | black |
| SAMD1    | black |
| SCARF2   | black |
| SCGB3A1  | black |
| SDF2L1   | black |
| SHISA8   | black |
| SKOR1    | black |
| SLC25A28 | black |
| SLC39A3  | black |
| SLC7A5P1 | black |
| SNAPC2   | black |
| SNRPA    | black |
| SOCS1    | black |
| SQLE     | black |
| SSBP4    | black |
| STBD1    | black |
| STK11    | black |
| SUV420H2 | black |
| TAF6L    | black |
| TBX6     | black |
| TCTEX1D4 | black |
| TFR2     | black |
| TIGD5    | black |
| TMEM102  | black |
| TMEM121  | black |
| TMEM160  | black |
| TMEM175  | black |
| TMEM55B  | black |
| TMEM93   | black |
| TMUB1    | black |
| TOR2A    | black |
| TPRA1    | black |
| TPRN     | black |
| TPST2    | black |
| TRADD    | black |
| TRAPPC5  | black |
| TTC22    | black |
| TUSC1    | black |
| UACA     | black |
| UCN      | black |
| UFSP1    | black |
| UFSP2    | black |
| UGP2     | black |
| USF2     | black |
| USP33    | black |
| UTF1     | black |
| VAPB     | black |
| WDR86    | black |
| WFIKKN1  | black |
| WNT6     | black |
| XKR6     | black |
| YIF1A    | black |
| YIF1B    | black |
| ZDHHC1   | black |
| ZDHHC24  | black |
| ZFPM1    | black |
| ZNF219   | black |
| ZNF35    | black |
| ZNF358   | black |
| ZNF414   | black |
| ZNF428   | black |
| ZNF444   | black |
| ZNF564   | black |
| ZNF575   | black |

|         |       |
|---------|-------|
| ZNF579  | black |
| ZNF628  | black |
| ZNF638  | black |
| ZNF668  | black |
| ZNF747  | black |
| ZNF764  | black |
| ZNF771  | black |
| ZNF784  | black |
| ZNF787  | black |
| ZNF804A | black |
| ZNF837  | black |
| ZNF865  | black |
| ZSCAN10 | black |
| ZSWIM1  | black |

6-Sep blue

11-Sep blue

|            |      |
|------------|------|
| A1BG-AS1   | blue |
| AAK1       | blue |
| AARS       | blue |
| AARS2      | blue |
| ABCA2      | blue |
| ABCB1      | blue |
| ABCC1      | blue |
| ABCC10     | blue |
| ABCF1      | blue |
| ABCF2      | blue |
| ABHD11-AS1 | blue |
| ABHD15     | blue |
| ABHD6      | blue |
| ABL1       | blue |
| ABL2       | blue |
| ABLIM1     | blue |
| ACAA2      | blue |
| ACACA      | blue |
| ACACB      | blue |
| ACAD8      | blue |
| ACE        | blue |
| ACER2      | blue |
| ACLY       | blue |
| ACN9       | blue |
| ACO2       | blue |
| ACOX2      | blue |
| ACOX3      | blue |
| ACSL5      | blue |
| ACTR10     | blue |
| ACTR8      | blue |
| ACVR1      | blue |
| ADAM11     | blue |
| ADAM23     | blue |
| ADAMTS10   | blue |
| ADAMTS17   | blue |
| ADAMTS4    | blue |
| ADAT1      | blue |
| ADCY3      | blue |
| ADCY6      | blue |
| ADCY7      | blue |
| ADCY9      | blue |
| ADD1       | blue |
| ADIPOR2    | blue |
| ADPGK      | blue |
| ADSS       | blue |
| AFG3L1P    | blue |
| AFG3L2     | blue |
| AGAP5      | blue |
| AGAP6      | blue |
| AGBL5      | blue |
| AGK        | blue |
| AGMAT      | blue |

|            |      |
|------------|------|
| AGPAT3     | blue |
| AGPAT6     | blue |
| AGXT2L2    | blue |
| AHCYL2     | blue |
| AHDC1      | blue |
| AHNAK      | blue |
| AHSA1      | blue |
| AIF1       | blue |
| AIFM1      | blue |
| AIFM2      | blue |
| AIG1       | blue |
| AIM1       | blue |
| AK2        | blue |
| AK5        | blue |
| AKAP1      | blue |
| AKAP17A    | blue |
| AKAP3      | blue |
| AKAP8      | blue |
| AKAP9      | blue |
| AKNA       | blue |
| AKT2       | blue |
| AKT3       | blue |
| ALAD       | blue |
| ALDH18A1   | blue |
| ALDH1B1    | blue |
| ALDH3A2    | blue |
| ALDH5A1    | blue |
| ALDH6A1    | blue |
| ALDH7A1    | blue |
| ALG8       | blue |
| ALG9       | blue |
| ALMS1      | blue |
| ALS2CL     | blue |
| ALX3       | blue |
| AMACR      | blue |
| AMBRA1     | blue |
| AMFR       | blue |
| AMIGO1     | blue |
| AMIGO3     | blue |
| AMMECR1L   | blue |
| AMOTL1     | blue |
| AMZ1       | blue |
| ANAPC1     | blue |
| ANAPC13    | blue |
| ANAPC5     | blue |
| ANAPC7     | blue |
| ANGEL1     | blue |
| ANK3       | blue |
| ANKH       | blue |
| ANKLE2     | blue |
| ANKRD11    | blue |
| ANKRD20A5P | blue |
| ANKRD27    | blue |
| ANKRD36    | blue |
| ANKRD36B   | blue |
| ANKRD40    | blue |
| ANKRD52    | blue |
| ANKS1B     | blue |
| ANKS6      | blue |
| ANKZF1     | blue |
| ANO8       | blue |
| ANP32B     | blue |
| ANXA2      | blue |
| ANXA6      | blue |
| AP2B1      | blue |
| AP3D1      | blue |
| AP3S1      | blue |
| APBA1      | blue |

|          |      |
|----------|------|
| APBA2    | blue |
| APBB1    | blue |
| APOBEC3F | blue |
| APOL3    | blue |
| APOLD1   | blue |
| APOOL    | blue |
| AQP3     | blue |
| AQR      | blue |
| ARG1     | blue |
| ARHGAP15 | blue |
| ARHGAP17 | blue |
| ARHGAP18 | blue |
| ARHGAP29 | blue |
| ARHGAP32 | blue |
| ARHGAP33 | blue |
| ARHGAP35 | blue |
| ARHGAP39 | blue |
| ARHGEF1  | blue |
| ARHGEF16 | blue |
| ARHGEF18 | blue |
| ARHGEF3  | blue |
| ARHGEF4  | blue |
| ARHGEF5  | blue |
| ARHGEF6  | blue |
| ARHGEF7  | blue |
| ARHGEF9  | blue |
| ARID1B   | blue |
| ARIH2    | blue |
| ARL10    | blue |
| ARL13A   | blue |
| ARL17A   | blue |
| ARL3     | blue |
| ARMCX1   | blue |
| ARMCX4   | blue |
| ARNTL2   | blue |
| ARPC2    | blue |
| ARPC3    | blue |
| ARPM1    | blue |
| ARRDC5   | blue |
| ASB1     | blue |
| ASB16    | blue |
| ASCC1    | blue |
| ASMT     | blue |
| ASPDH    | blue |
| ASXL1    | blue |
| ATAD3C   | blue |
| ATAT1    | blue |
| ATF6B    | blue |
| ATG10    | blue |
| ATG13    | blue |
| ATG14    | blue |
| ATG3     | blue |
| ATG9B    | blue |
| ATIC     | blue |
| ATM      | blue |
| ATN1     | blue |
| ATOX1    | blue |
| ATP10A   | blue |
| ATP13A1  | blue |
| ATP1A1   | blue |
| ATP1A3   | blue |
| ATP1B3   | blue |
| ATP2A2   | blue |
| ATP2A3   | blue |
| ATP5A1   | blue |
| ATP5B    | blue |
| ATP5J    | blue |
| ATP5J2   | blue |

|          |      |
|----------|------|
| ATP6V0E1 | blue |
| ATP6V1D  | blue |
| ATP6V1F  | blue |
| ATP6V1H  | blue |
| ATP8B1   | blue |
| ATP8B2   | blue |
| ATP9B    | blue |
| ATRN     | blue |
| ATXN1L   | blue |
| ATXN2L   | blue |
| ATXN7L1  | blue |
| AURKAPS1 | blue |
| AVPR2    | blue |
| AXIN1    | blue |
| AXIN2    | blue |
| B3GALT4  | blue |
| B3GNTL1  | blue |
| B7H6     | blue |
| BACE1    | blue |
| BACE1-AS | blue |
| BACH2    | blue |
| BAD      | blue |
| BAG3     | blue |
| BAHCC1   | blue |
| BAHD1    | blue |
| BAIAP2L1 | blue |
| BATF     | blue |
| BATF3    | blue |
| BAZ1B    | blue |
| BBS1     | blue |
| BBS2     | blue |
| BBS9     | blue |
| BCL10    | blue |
| BCL11B   | blue |
| BCL2     | blue |
| BCL9L    | blue |
| BDH1     | blue |
| BET1L    | blue |
| BEX1     | blue |
| BICD1    | blue |
| BID      | blue |
| BIK      | blue |
| BIRC6    | blue |
| BLCAP    | blue |
| BLM      | blue |
| BLMH     | blue |
| BLOC1S1  | blue |
| BMP2     | blue |
| BMP8A    | blue |
| BMP8B    | blue |
| BMS1     | blue |
| BMS1P4   | blue |
| BPTF     | blue |
| BRD1     | blue |
| BRD2     | blue |
| BRD7     | blue |
| BRI3     | blue |
| BRI3BP   | blue |
| BRK1     | blue |
| BRPF1    | blue |
| BRSK2    | blue |
| BSDC1    | blue |
| BSN      | blue |
| BTBD11   | blue |
| BTBD18   | blue |
| BTBD2    | blue |
| BTN3A2   | blue |
| BTN3A3   | blue |



|            |      |
|------------|------|
| BTNL3      | blue |
| BTRC       | blue |
| C10orf111  | blue |
| C10orf128  | blue |
| C10orf76   | blue |
| C11orf10   | blue |
| C11orf21   | blue |
| C11orf71   | blue |
| C11orf74   | blue |
| C11orf75   | blue |
| C11orf82   | blue |
| C11orf9    | blue |
| C11orf95   | blue |
| C12orf33   | blue |
| C12orf39   | blue |
| C12orf43   | blue |
| C12orf49   | blue |
| C12orf51   | blue |
| C12orf60   | blue |
| C12orf61   | blue |
| C14orf102  | blue |
| C14orf109  | blue |
| C14orf169  | blue |
| C14orf182  | blue |
| C14orf21   | blue |
| C14orf49   | blue |
| C15orf23   | blue |
| C15orf27   | blue |
| C15orf29   | blue |
| C15orf37   | blue |
| C15orf44   | blue |
| C15orf48   | blue |
| C15orf52   | blue |
| C15orf62   | blue |
| C16orf48   | blue |
| C16orf58   | blue |
| C16orf62   | blue |
| C16orf80   | blue |
| C16orf88   | blue |
| C16orf93   | blue |
| C16orf96   | blue |
| C17orf28   | blue |
| C17orf37   | blue |
| C17orf46   | blue |
| C17orf50   | blue |
| C17orf65   | blue |
| C17orf69   | blue |
| C17orf91   | blue |
| C17orf97   | blue |
| C18orf21   | blue |
| C18orf32   | blue |
| C18orf45   | blue |
| C19orf23   | blue |
| C19orf29   | blue |
| C19orf29OS | blue |
| C19orf34   | blue |
| C19orf50   | blue |
| C19orf55   | blue |
| C19orf56   | blue |
| C19orf71   | blue |
| C1D        | blue |
| C1GALT1C1  | blue |
| C1orf109   | blue |
| C1orf114   | blue |
| C1orf144   | blue |
| C1orf152   | blue |
| C1orf192   | blue |
| C1orf194   | blue |

|           |      |
|-----------|------|
| C1orf201  | blue |
| C1orf227  | blue |
| C1orf52   | blue |
| C1orf53   | blue |
| C1orf61   | blue |
| C1orf63   | blue |
| C20orf112 | blue |
| C20orf118 | blue |
| C20orf12  | blue |
| C20orf132 | blue |
| C20orf165 | blue |
| C20orf194 | blue |
| C20orf4   | blue |
| C21orf62  | blue |
| C21orf96  | blue |
| C22orf13  | blue |
| C22orf23  | blue |
| C22orf28  | blue |
| C22orf29  | blue |
| C22orf36  | blue |
| C22orf41  | blue |
| C22orf43  | blue |
| C22orf45  | blue |
| C2CD2     | blue |
| C2CD3     | blue |
| C2orf27A  | blue |
| C2orf42   | blue |
| C2orf44   | blue |
| C2orf50   | blue |
| C2orf62   | blue |
| C3orf19   | blue |
| C3orf37   | blue |
| C3orf54   | blue |
| C4orf3    | blue |
| C4orf42   | blue |
| C5orf13   | blue |
| C5orf20   | blue |
| C5orf25   | blue |
| C5orf45   | blue |
| C5orf62   | blue |
| C6orf1    | blue |
| C6orf106  | blue |
| C6orf136  | blue |
| C6orf165  | blue |
| C6orf52   | blue |
| C7orf25   | blue |
| C7orf42   | blue |
| C7orf44   | blue |
| C7orf73   | blue |
| C8orf44   | blue |
| C9orf150  | blue |
| C9orf46   | blue |
| C9orf6    | blue |
| C9orf66   | blue |
| C9orf89   | blue |
| C9orf9    | blue |
| C9orf91   | blue |
| C9orf96   | blue |
| CABP4     | blue |
| CACNA1F   | blue |
| CACNA1I   | blue |
| CACNA2D3  | blue |
| CACNB1    | blue |
| CAD       | blue |
| CADM1     | blue |
| CADM2     | blue |
| CALM1     | blue |
| CALM3     | blue |

|          |      |
|----------|------|
| CALR     | blue |
| CAMP     | blue |
| CAMSAP1  | blue |
| CAMTA2   | blue |
| CAND2    | blue |
| CAPN2    | blue |
| CAPN3    | blue |
| CAPN5    | blue |
| CAPNS2   | blue |
| CARD11   | blue |
| CARD14   | blue |
| CARD16   | blue |
| CARNS1   | blue |
| CASKIN2  | blue |
| CASP1    | blue |
| CASP10   | blue |
| CASP2    | blue |
| CATSPER1 | blue |
| CATSPER2 | blue |
| CBFA2T2  | blue |
| CBLB     | blue |
| CBWD3    | blue |
| CBWD6    | blue |
| CBX2     | blue |
| CBX5     | blue |
| CBX7     | blue |
| CC2D1B   | blue |
| CC2D2B   | blue |
| CCAR1    | blue |
| CCDC120  | blue |
| CCDC127  | blue |
| CCDC134  | blue |
| CCDC141  | blue |
| CCDC142  | blue |
| CCDC148  | blue |
| CCDC153  | blue |
| CCDC164  | blue |
| CCDC23   | blue |
| CCDC24   | blue |
| CCDC28A  | blue |
| CCDC64   | blue |
| CCDC68   | blue |
| CCDC88C  | blue |
| CCDC93   | blue |
| CCL8     | blue |
| CCND1    | blue |
| CCND2    | blue |
| CCNDBP1  | blue |
| CCNF     | blue |
| CCNT1    | blue |
| CCR4     | blue |
| CCR7     | blue |
| CCR8     | blue |
| CCRL2    | blue |
| CCT3     | blue |
| CCT5     | blue |
| CCT6A    | blue |
| CCT7     | blue |
| CCT8     | blue |
| CD1A     | blue |
| CD247    | blue |
| CD3E     | blue |
| CD3EAP   | blue |
| CD4      | blue |
| CD40LG   | blue |
| CD6      | blue |
| CD74     | blue |
| CD84     | blue |

|          |      |
|----------|------|
| CD8A     | blue |
| CD96     | blue |
| CD99L2   | blue |
| CDAN1    | blue |
| CDC16    | blue |
| CDC25B   | blue |
| CDC42BPA | blue |
| CDC42BPB | blue |
| CDC42BPG | blue |
| CDH13    | blue |
| CDH20    | blue |
| CDH23    | blue |
| CDH24    | blue |
| CDHR2    | blue |
| CDK5RAP2 | blue |
| CDKAL1   | blue |
| CDKN2A   | blue |
| CDKN2B   | blue |
| CDON     | blue |
| CDR2     | blue |
| CECR1    | blue |
| CELF1    | blue |
| CELSR2   | blue |
| CELSR3   | blue |
| CEND1    | blue |
| CENPN    | blue |
| CENPO    | blue |
| CEP104   | blue |
| CEP164   | blue |
| CEP72    | blue |
| CEP85    | blue |
| CEP89    | blue |
| CERK     | blue |
| CES2     | blue |
| CG030    | blue |
| CHAD     | blue |
| CHCHD3   | blue |
| CHD1L    | blue |
| CHD2     | blue |
| CHD3     | blue |
| CHD4     | blue |
| CHD6     | blue |
| CHEK2    | blue |
| CHMP4C   | blue |
| CHMP5    | blue |
| CHMP7    | blue |
| CHRNA2   | blue |
| CHRNA5   | blue |
| CHST12   | blue |
| CHTF8    | blue |
| CIAO1    | blue |
| CIC      | blue |
| CIDECP   | blue |
| CIITA    | blue |
| CINP     | blue |
| CIRBP    | blue |
| CIRH1A   | blue |
| CIT      | blue |
| CIZ1     | blue |
| CKAP5    | blue |
| CKLF     | blue |
| CKM      | blue |
| CLCC1    | blue |
| CLCN3    | blue |
| CLCN6    | blue |
| CLDN15   | blue |
| CLDN20   | blue |
| CLEC12A  | blue |

|         |      |
|---------|------|
| CLEC16A | blue |
| CLEC18C | blue |
| CLEC3B  | blue |
| CLEC4A  | blue |
| CLEC4D  | blue |
| CLEC4E  | blue |
| CLEC9A  | blue |
| CLIC1   | blue |
| CLK2    | blue |
| CLN8    | blue |
| CLPB    | blue |
| CLSTN1  | blue |
| CLUAP1  | blue |
| CMBL    | blue |
| CMKLR1  | blue |
| CMTM2   | blue |
| CMTM4   | blue |
| CNDP2   | blue |
| CNIH3   | blue |
| CNIH4   | blue |
| CNNM2   | blue |
| CNNM3   | blue |
| CNOT10  | blue |
| CNTNAP1 | blue |
| CNTRL   | blue |
| COG1    | blue |
| COG2    | blue |
| COG5    | blue |
| COG7    | blue |
| COL17A1 | blue |
| COL27A1 | blue |
| COL5A1  | blue |
| COL6A3  | blue |
| COPG2   | blue |
| COPS7B  | blue |
| CORO2A  | blue |
| COX10   | blue |
| COX15   | blue |
| COX5B   | blue |
| COX8A   | blue |
| CPSF3   | blue |
| CRADD   | blue |
| CRAMP1L | blue |
| CRB2    | blue |
| CREB3L2 | blue |
| CREG1   | blue |
| CREM    | blue |
| CRISP2  | blue |
| CROCC   | blue |
| CROCCP3 | blue |
| CRTC1   | blue |
| CRTC3   | blue |
| CRY2    | blue |
| CRYBB1  | blue |
| CSNK1E  | blue |
| CSNK2A2 | blue |
| CSRNP2  | blue |
| CSRP2BP | blue |
| CSTB    | blue |
| CSTF1   | blue |
| CSTF2   | blue |
| CSTF3   | blue |
| CTC1    | blue |
| CTCF    | blue |
| CTNBL1  | blue |
| CTPS    | blue |
| CTPS2   | blue |
| CTR9    | blue |

|          |      |
|----------|------|
| CUBN     | blue |
| CUL1     | blue |
| CUL4A    | blue |
| CUL7     | blue |
| CUL9     | blue |
| CXCL1    | blue |
| CXCL11   | blue |
| CXCR3    | blue |
| CXXC5    | blue |
| CYB561D1 | blue |
| CYB5B    | blue |
| CYB5RL   | blue |
| CYFIP2   | blue |
| CYP20A1  | blue |
| CYP2D6   | blue |
| CYTH1    | blue |
| CYTH3    | blue |
| CYTL1    | blue |
| D2HGDH   | blue |
| DAD1     | blue |
| DAGLA    | blue |
| DARS2    | blue |
| DBF4B    | blue |
| DBH      | blue |
| DBR1     | blue |
| DCAF16   | blue |
| DCAF4    | blue |
| DCAF4L1  | blue |
| DCAF5    | blue |
| DCAF7    | blue |
| DCAF8    | blue |
| DCHS1    | blue |
| DCLK2    | blue |
| DCLRE1C  | blue |
| DCN      | blue |
| DCP1B    | blue |
| DCTD     | blue |
| DCTN1    | blue |
| DCTN5    | blue |
| DDB1     | blue |
| DDHD2    | blue |
| DDI2     | blue |
| DDIT3    | blue |
| DDIT4    | blue |
| DDIT4L   | blue |
| DDR1     | blue |
| DDX10    | blue |
| DDX17    | blue |
| DDX18    | blue |
| DDX19A   | blue |
| DDX19B   | blue |
| DDX20    | blue |
| DDX23    | blue |
| DDX24    | blue |
| DDX27    | blue |
| DDX31    | blue |
| DDX42    | blue |
| DDX46    | blue |
| DDX47    | blue |
| DDX51    | blue |
| DDX52    | blue |
| DDX55    | blue |
| DDX56    | blue |
| DDX6     | blue |
| DENND2D  | blue |
| DENND4B  | blue |
| DEPDC5   | blue |
| DERA     | blue |

|               |      |
|---------------|------|
| DERL2         | blue |
| DET1          | blue |
| DFFA          | blue |
| DFFB          | blue |
| DFNB31        | blue |
| DGKA          | blue |
| DGKD          | blue |
| DGKH          | blue |
| DGKQ          | blue |
| DHCR24        | blue |
| DHCR7         | blue |
| DHDDS         | blue |
| DHODH         | blue |
| DHX15         | blue |
| DHX16         | blue |
| DHX32         | blue |
| DHX33         | blue |
| DHX35         | blue |
| DHX37         | blue |
| DHX38         | blue |
| DHX57         | blue |
| DHX9          | blue |
| DIAPH1        | blue |
| DIDO1         | blue |
| DIEXF         | blue |
| DIP2A         | blue |
| DIS3L         | blue |
| DKC1          | blue |
| DKFZp779M0652 | blue |
| DLD           | blue |
| DLEC1         | blue |
| DLG3          | blue |
| DLK2          | blue |
| DLST          | blue |
| DMWD          | blue |
| DNAH1         | blue |
| DNAJA3        | blue |
| DNAJA4        | blue |
| DNAJB1        | blue |
| DNAJB13       | blue |
| DNAJC1        | blue |
| DNAJC11       | blue |
| DNAJC16       | blue |
| DNAJC7        | blue |
| DNAL1         | blue |
| DNASE1        | blue |
| DNHD1         | blue |
| DNM1          | blue |
| DNMT1         | blue |
| DNMT3A        | blue |
| DOCK10        | blue |
| DOCK7         | blue |
| DOCK9         | blue |
| DOPEY2        | blue |
| DPH1          | blue |
| DPP4          | blue |
| DPP9          | blue |
| DPYSL2        | blue |
| DRAM1         | blue |
| DRD4          | blue |
| DRG1          | blue |
| DROSHA        | blue |
| DSCAML1       | blue |
| DST           | blue |
| DSTNP2        | blue |
| DSTYK         | blue |
| DTL           | blue |
| DTX4          | blue |

|           |      |
|-----------|------|
| DUOX1     | blue |
| DUSP16    | blue |
| DUSP28    | blue |
| DUSP7     | blue |
| DVL2      | blue |
| DYNC1H1   | blue |
| DYNC1I2   | blue |
| DYNC1LI2  | blue |
| DYNLT1    | blue |
| DYTN      | blue |
| DYX1C1    | blue |
| EARS2     | blue |
| ECD       | blue |
| ECHDC2    | blue |
| ECI2      | blue |
| ECRP      | blue |
| EDAR      | blue |
| EDC3      | blue |
| EDC4      | blue |
| EDEM1     | blue |
| EEF2      | blue |
| EEF2K     | blue |
| EFCAB1    | blue |
| EFCAB4B   | blue |
| EFEMP2    | blue |
| EFHC2     | blue |
| EFHD1     | blue |
| EFNA4     | blue |
| EFTUD1    | blue |
| EFTUD2    | blue |
| EGFL7     | blue |
| EHBP1     | blue |
| EHD4      | blue |
| EHMT1     | blue |
| EIF1AD    | blue |
| EIF2AK3   | blue |
| EIF2AK4   | blue |
| EIF2B1    | blue |
| EIF2S3    | blue |
| EIF3A     | blue |
| EIF3B     | blue |
| EIF4A3    | blue |
| EIF4B     | blue |
| EIF4ENIF1 | blue |
| EIF4G1    | blue |
| EIF4G2    | blue |
| EIF5A     | blue |
| EIF5B     | blue |
| ELAVL1    | blue |
| ELFN2     | blue |
| ELP3      | blue |
| EMD       | blue |
| EME2      | blue |
| EML3      | blue |
| ENO1-AS1  | blue |
| ENO2      | blue |
| ENOSF1    | blue |
| ENOX2     | blue |
| ENTPD4    | blue |
| ENTPD5    | blue |
| ENTPD8    | blue |
| EP400     | blue |
| EP400NL   | blue |
| EPB41L2   | blue |
| EPHA1     | blue |
| EPHA2     | blue |
| EPHX1     | blue |
| EPHX2     | blue |



|          |      |
|----------|------|
| EPPK1    | blue |
| EPRS     | blue |
| EPS8     | blue |
| ERBB3    | blue |
| ERCC3    | blue |
| ERCC5    | blue |
| ESYT1    | blue |
| ESYT2    | blue |
| ETFDH    | blue |
| ETHE1    | blue |
| ETS1     | blue |
| EVI5L    | blue |
| EVL      | blue |
| EXD2     | blue |
| EXOC2    | blue |
| EXOC4    | blue |
| EXOC7    | blue |
| EXOG     | blue |
| EXOSC10  | blue |
| EXT2     | blue |
| EZH1     | blue |
| EZR      | blue |
| F12      | blue |
| F2       | blue |
| FADS1    | blue |
| FADS2    | blue |
| FAF1     | blue |
| FAIM3    | blue |
| FAM102A  | blue |
| FAM103A1 | blue |
| FAM105B  | blue |
| FAM106A  | blue |
| FAM110B  | blue |
| FAM115A  | blue |
| FAM117A  | blue |
| FAM118A  | blue |
| FAM120C  | blue |
| FAM122A  | blue |
| FAM123B  | blue |
| FAM125B  | blue |
| FAM132A  | blue |
| FAM134C  | blue |
| FAM150B  | blue |
| FAM153A  | blue |
| FAM153B  | blue |
| FAM160B2 | blue |
| FAM161B  | blue |
| FAM168B  | blue |
| FAM171A1 | blue |
| FAM174A  | blue |
| FAM175B  | blue |
| FAM176B  | blue |
| FAM184B  | blue |
| FAM186B  | blue |
| FAM188B2 | blue |
| FAM193B  | blue |
| FAM198A  | blue |
| FAM201A  | blue |
| FAM20B   | blue |
| FAM22D   | blue |
| FAM22G   | blue |
| FAM26F   | blue |
| FAM38A   | blue |
| FAM40A   | blue |
| FAM57A   | blue |
| FAM70B   | blue |
| FAM72B   | blue |
| FAM78A   | blue |

|            |      |
|------------|------|
| FAM81B     | blue |
| FAM83G     | blue |
| FAM86A     | blue |
| FAM89A     | blue |
| FAM98A     | blue |
| FAN1       | blue |
| FANCI      | blue |
| FARSB      | blue |
| FAS-AS1    | blue |
| FASN       | blue |
| FASTKD5    | blue |
| FAT2       | blue |
| FBF1       | blue |
| FBLN2      | blue |
| FBRSL1     | blue |
| FBXL12     | blue |
| FBXL18     | blue |
| FBXL19     | blue |
| FBXL19-AS1 | blue |
| FBXO18     | blue |
| FBXO21     | blue |
| FBXO41     | blue |
| FBXW2      | blue |
| FBXW4P1    | blue |
| FBXW8      | blue |
| FCER1G     | blue |
| FCGBP      | blue |
| FEN1       | blue |
| FER1L4     | blue |
| FEZ2       | blue |
| FGD1       | blue |
| FGF2       | blue |
| FGFR1      | blue |
| FGFRL1     | blue |
| FGGY       | blue |
| FH         | blue |
| FHL1       | blue |
| FIP1L1     | blue |
| FITM2      | blue |
| FKBP1AP1   | blue |
| FKBP4      | blue |
| FKRP       | blue |
| FLJ12334   | blue |
| FLJ13224   | blue |
| FLJ27352   | blue |
| FLJ30403   | blue |
| FLJ33065   | blue |
| FLJ35776   | blue |
| FLJ36777   | blue |
| FLJ37201   | blue |
| FLJ38109   | blue |
| FLJ39639   | blue |
| FLJ39653   | blue |
| FLJ42289   | blue |
| FLJ42627   | blue |
| FLJ43390   | blue |
| FLJ43663   | blue |
| FLNA       | blue |
| FLNB       | blue |
| FLNC       | blue |
| FLT4       | blue |
| FLVCR1     | blue |
| FLYWCH1    | blue |
| FMNL3      | blue |
| FN3KRP     | blue |
| FNBP1      | blue |
| FNBP4      | blue |
| FNDCC5     | blue |

|           |      |
|-----------|------|
| FNDC9     | blue |
| FOSB      | blue |
| FOXC1     | blue |
| FOXI1     | blue |
| FOXJ1     | blue |
| FOXJ3     | blue |
| FOXK1     | blue |
| FOXK2     | blue |
| FOXM1     | blue |
| FOXP1     | blue |
| FOXP4     | blue |
| FOXRED2   | blue |
| FP588     | blue |
| FRMD4A    | blue |
| FSCN2     | blue |
| FSIP1     | blue |
| FTSJ2     | blue |
| FTSJ3     | blue |
| FTX       | blue |
| FUBP1     | blue |
| FUT11     | blue |
| FUT2      | blue |
| FXN       | blue |
| FXYD1     | blue |
| FYCO1     | blue |
| FYN       | blue |
| FZR1      | blue |
| G0S2      | blue |
| G3BP1     | blue |
| GABARAPL2 | blue |
| GABBR1    | blue |
| GABPB2    | blue |
| GADD45A   | blue |
| GAL3ST4   | blue |
| GALK2     | blue |
| GALM      | blue |
| GALNT10   | blue |
| GALNT6    | blue |
| GALNT9    | blue |
| GALT      | blue |
| GANAB     | blue |
| GANC      | blue |
| GAR1      | blue |
| GARS      | blue |
| GART      | blue |
| GATA3     | blue |
| GBF1      | blue |
| GCN1L1    | blue |
| GDF11     | blue |
| GEMIN4    | blue |
| GEMIN5    | blue |
| GFM1      | blue |
| GGA3      | blue |
| GGCX      | blue |
| GGH       | blue |
| GGN       | blue |
| GGNBP2    | blue |
| GGT7      | blue |
| GGTA1P    | blue |
| GHRLOS    | blue |
| GIGYF1    | blue |
| GIMAP6    | blue |
| GINS4     | blue |
| GIPC2     | blue |
| GIPC3     | blue |
| GIPR      | blue |
| GK5       | blue |
| GLE1      | blue |

|         |      |
|---------|------|
| GLG1    | blue |
| GLIPR1  | blue |
| GLOD4   | blue |
| GLS2    | blue |
| GLTP    | blue |
| GLUD1   | blue |
| GMEB2   | blue |
| GMFG    | blue |
| GMPS    | blue |
| GNE     | blue |
| GNG10   | blue |
| GNL2    | blue |
| GNL3L   | blue |
| GNPDA1  | blue |
| GOLGA1  | blue |
| GOLGA2B | blue |
| GOLGA3  | blue |
| GOLGA7  | blue |
| GON4L   | blue |
| GORASP2 | blue |
| GOSR2   | blue |
| GOT1    | blue |
| GOT2    | blue |
| GP1BA   | blue |
| GP5     | blue |
| GPA33   | blue |
| GPANK1  | blue |
| GPATCH1 | blue |
| GPATCH4 | blue |
| GPATCH8 | blue |
| GPC2    | blue |
| GPHN    | blue |
| GPN2    | blue |
| GPN3    | blue |
| GPR133  | blue |
| GPR137C | blue |
| GPR152  | blue |
| GPR157  | blue |
| GPR20   | blue |
| GPR55   | blue |
| GPR61   | blue |
| GPR75   | blue |
| GPR88   | blue |
| GPR89B  | blue |
| GPRASP1 | blue |
| GPRC5C  | blue |
| GPT     | blue |
| GPT2    | blue |
| GPX2    | blue |
| GRAMD4  | blue |
| GRAP2   | blue |
| GRID2IP | blue |
| GRIN2C  | blue |
| GRIPAP1 | blue |
| GRM2    | blue |
| GRPEL1  | blue |
| GSDMB   | blue |
| GSTM4   | blue |
| GSTO1   | blue |
| GTF2A2  | blue |
| GTF3C1  | blue |
| GTF3C2  | blue |
| GTF3C4  | blue |
| GTPBP4  | blue |
| GUCY2D  | blue |
| GUSBP11 | blue |
| GUSBP3  | blue |
| GYS1    | blue |

|           |      |
|-----------|------|
| GYS2      | blue |
| H3F3A     | blue |
| H3F3C     | blue |
| H6PD      | blue |
| HABP4     | blue |
| HACL1     | blue |
| HADH      | blue |
| HADHA     | blue |
| HADHB     | blue |
| HARS      | blue |
| HAUS5     | blue |
| HBXIP     | blue |
| HCFC1     | blue |
| HCG18     | blue |
| HCG26     | blue |
| HCN3      | blue |
| HDAC1     | blue |
| HEATR1    | blue |
| HEATR2    | blue |
| HEATR4    | blue |
| HEATR5B   | blue |
| HEATR6    | blue |
| HEATR7A   | blue |
| HEBP2     | blue |
| HECTD1    | blue |
| HEG1      | blue |
| HELB      | blue |
| HEMK1     | blue |
| HERC1     | blue |
| HERC2     | blue |
| HEXIM1    | blue |
| HGF       | blue |
| HHAT      | blue |
| HHEX      | blue |
| HHLA2     | blue |
| HIC2      | blue |
| HIF1AN    | blue |
| HIST1H2AC | blue |
| HIST1H2AK | blue |
| HIST1H2AL | blue |
| HIST1H2BF | blue |
| HIST1H2BN | blue |
| HIST1H4I  | blue |
| HIST2H2AC | blue |
| HIST2H2BC | blue |
| HIST2H2BE | blue |
| HIST2H3D  | blue |
| HIST4H4   | blue |
| HKDC1     | blue |
| HLA-DRB1  | blue |
| HLCS      | blue |
| HMG20A    | blue |
| HMGA1     | blue |
| HMGXB3    | blue |
| HMHA1     | blue |
| HN1L      | blue |
| HNRNPA0   | blue |
| HNRNPA2B1 | blue |
| HNRNPA3   | blue |
| HNRNPAB   | blue |
| HNRNPH1   | blue |
| HNRNPM    | blue |
| HNRNPR    | blue |
| HNRNPU    | blue |
| HOMEZ     | blue |
| HOTAIRM1  | blue |
| HOXA9     | blue |
| HOXB2     | blue |

|          |      |
|----------|------|
| HP1BP3   | blue |
| HPD      | blue |
| HPS4     | blue |
| HPS5     | blue |
| HRASLS2  | blue |
| HSBP1    | blue |
| HSD17B13 | blue |
| HSP90AB1 | blue |
| HSP90B1  | blue |
| HSPA1L   | blue |
| HSPA4    | blue |
| HSPA8    | blue |
| HSPA9    | blue |
| HSPD1    | blue |
| HSPG2    | blue |
| HSPH1    | blue |
| HTATIP2  | blue |
| HTATSF1  | blue |
| HTRA2    | blue |
| HTT      | blue |
| HUWE1    | blue |
| HYAL1    | blue |
| HYAL2    | blue |
| HYOU1    | blue |
| IARS     | blue |
| IARS2    | blue |
| IBA57    | blue |
| ICMT     | blue |
| ID1      | blue |
| IDH3A    | blue |
| IDI2     | blue |
| IFFO2    | blue |
| IFITM5   | blue |
| IFT172   | blue |
| IGFBP7   | blue |
| IGLL1    | blue |
| IGSF9B   | blue |
| IK       | blue |
| IKBIP    | blue |
| IKBKAP   | blue |
| IKBKB    | blue |
| IKBKE    | blue |
| IKZF3    | blue |
| IL10     | blue |
| IL10RA   | blue |
| IL11RA   | blue |
| IL12RB2  | blue |
| IL16     | blue |
| IL18     | blue |
| IL18BP   | blue |
| IL21R    | blue |
| IL26     | blue |
| IL27     | blue |
| IL29     | blue |
| IL2RA    | blue |
| IL2RB    | blue |
| IL2RG    | blue |
| IL31RA   | blue |
| IL4      | blue |
| IL7R     | blue |
| ILF2     | blue |
| ILF3     | blue |
| IMMT     | blue |
| INADL    | blue |
| INCA1    | blue |
| INCENP   | blue |
| INE1     | blue |
| ING1     | blue |

|          |      |
|----------|------|
| ING2     | blue |
| ING5     | blue |
| INO80    | blue |
| INPP4A   | blue |
| INPP5B   | blue |
| INPP5E   | blue |
| INPPL1   | blue |
| INTS1    | blue |
| INTS4    | blue |
| INTS7    | blue |
| INTS9    | blue |
| INVS     | blue |
| IP6K2    | blue |
| IPCEF1   | blue |
| IPO5     | blue |
| IPO9     | blue |
| IPP      | blue |
| IRAK1    | blue |
| IRF8     | blue |
| IRGM     | blue |
| IRGQ     | blue |
| IRS1     | blue |
| ISCA2    | blue |
| ITFG2    | blue |
| ITGA6    | blue |
| ITGAL    | blue |
| ITM2C    | blue |
| ITPKB    | blue |
| ITPR3    | blue |
| IVD      | blue |
| IWS1     | blue |
| JAM3     | blue |
| JAZF1    | blue |
| JMJD5    | blue |
| JOSD1    | blue |
| JPH3     | blue |
| JRK      | blue |
| JTB      | blue |
| JUB      | blue |
| KALRN    | blue |
| KANK1    | blue |
| KARS     | blue |
| KAT6B    | blue |
| KAZALD1  | blue |
| KCMF1    | blue |
| KCNA6    | blue |
| KCNAB3   | blue |
| KCNC4    | blue |
| KCNE3    | blue |
| KCNJ13   | blue |
| KCNJ14   | blue |
| KCNJ9    | blue |
| KCNK10   | blue |
| KCTD1    | blue |
| KCTD10   | blue |
| KCTD13   | blue |
| KCTD5    | blue |
| KDEL2    | blue |
| KDEL3    | blue |
| KDM1A    | blue |
| KDM2B    | blue |
| KDM4A    | blue |
| KDM4C    | blue |
| KDM5C    | blue |
| KHDRBS1  | blue |
| KHNYN    | blue |
| KHSRP    | blue |
| KIAA0090 | blue |

|           |      |
|-----------|------|
| KIAA0100  | blue |
| KIAA0141  | blue |
| KIAA0174  | blue |
| KIAA0182  | blue |
| KIAA0226  | blue |
| KIAA0355  | blue |
| KIAA0368  | blue |
| KIAA0494  | blue |
| KIAA0586  | blue |
| KIAA0664  | blue |
| KIAA0748  | blue |
| KIAA0753  | blue |
| KIAA0754  | blue |
| KIAA0889  | blue |
| KIAA0947  | blue |
| KIAA1147  | blue |
| KIAA1191  | blue |
| KIAA1274  | blue |
| KIAA1310  | blue |
| KIAA1324L | blue |
| KIAA1429  | blue |
| KIAA1530  | blue |
| KIAA1609  | blue |
| KIAA1797  | blue |
| KIAA1908  | blue |
| KIAA1919  | blue |
| KIF13B    | blue |
| KIF16B    | blue |
| KIF21B    | blue |
| KIF3B     | blue |
| KIF4A     | blue |
| KIF5C     | blue |
| KIR2DL3   | blue |
| KIR3DL2   | blue |
| KITLG     | blue |
| KLB       | blue |
| KLC1      | blue |
| KLC2      | blue |
| KLF11     | blue |
| KLHDC8B   | blue |
| KLHL29    | blue |
| KLHL3     | blue |
| KLHL31    | blue |
| KLHL34    | blue |
| KLHL36    | blue |
| KLHL6     | blue |
| KNTC1     | blue |
| KPNA6     | blue |
| KRBA1     | blue |
| KRBA2     | blue |
| KRT10     | blue |
| KRT5      | blue |
| KRT7      | blue |
| KRTAP5-1  | blue |
| KY        | blue |
| KYNU      | blue |
| L3MBTL1   | blue |
| L3MBTL2   | blue |
| LAIR1     | blue |
| LAMA2     | blue |
| LAMB2P1   | blue |
| LAMTOR1   | blue |
| LANCL2    | blue |
| LAPTM4B   | blue |
| LARP1     | blue |
| LARP7     | blue |
| LARS      | blue |
| LARS2     | blue |



|              |      |
|--------------|------|
| LAS1L        | blue |
| LAX1         | blue |
| LBH          | blue |
| LCK          | blue |
| LDB1         | blue |
| LDHA         | blue |
| LDHAL6A      | blue |
| LDLRAP1      | blue |
| LEF1         | blue |
| LENG8        | blue |
| LEO1         | blue |
| LEPREL1      | blue |
| LETM1        | blue |
| LGALS17A     | blue |
| LGALS2       | blue |
| LGALS8-AS1   | blue |
| LGMN         | blue |
| LGSN         | blue |
| LHX4         | blue |
| LIG1         | blue |
| LIG3         | blue |
| LILRA5       | blue |
| LIPT2        | blue |
| LIX1L        | blue |
| LLPH         | blue |
| LMAN2L       | blue |
| LMLN         | blue |
| LMO2         | blue |
| LMO7         | blue |
| LMOD3        | blue |
| LMTK3        | blue |
| LNPEP        | blue |
| LOC100128288 | blue |
| LOC100128361 | blue |
| LOC100128573 | blue |
| LOC100128822 | blue |
| LOC100129250 | blue |
| LOC100129480 | blue |
| LOC100129716 | blue |
| LOC100129827 | blue |
| LOC100129845 | blue |
| LOC100129917 | blue |
| LOC100130932 | blue |
| LOC100130950 | blue |
| LOC100131094 | blue |
| LOC100131096 | blue |
| LOC100131193 | blue |
| LOC100131347 | blue |
| LOC100131434 | blue |
| LOC100131564 | blue |
| LOC100132273 | blue |
| LOC100132352 | blue |
| LOC100132356 | blue |
| LOC100132774 | blue |
| LOC100133286 | blue |
| LOC100133315 | blue |
| LOC100133445 | blue |
| LOC100133545 | blue |
| LOC100133957 | blue |
| LOC100133991 | blue |
| LOC100144603 | blue |
| LOC100216545 | blue |
| LOC100216546 | blue |
| LOC100271722 | blue |
| LOC100271836 | blue |
| LOC100272228 | blue |
| LOC100287042 | blue |
| LOC100287722 | blue |

|              |      |
|--------------|------|
| LOC100288123 | blue |
| LOC100288615 | blue |
| LOC100289019 | blue |
| LOC100289230 | blue |
| LOC100289361 | blue |
| LOC100289511 | blue |
| LOC100293516 | blue |
| LOC100329109 | blue |
| LOC100499466 | blue |
| LOC100505495 | blue |
| LOC100505648 | blue |
| LOC100505678 | blue |
| LOC100505681 | blue |
| LOC100505716 | blue |
| LOC100505839 | blue |
| LOC100505854 | blue |
| LOC100505933 | blue |
| LOC100506033 | blue |
| LOC100506046 | blue |
| LOC100506123 | blue |
| LOC100506334 | blue |
| LOC100506436 | blue |
| LOC100506472 | blue |
| LOC100506655 | blue |
| LOC100506713 | blue |
| LOC100506714 | blue |
| LOC100506730 | blue |
| LOC100506779 | blue |
| LOC100506801 | blue |
| LOC100506810 | blue |
| LOC100506939 | blue |
| LOC100507034 | blue |
| LOC100507178 | blue |
| LOC100507217 | blue |
| LOC100507218 | blue |
| LOC100507321 | blue |
| LOC100507424 | blue |
| LOC100507433 | blue |
| LOC100507463 | blue |
| LOC100507634 | blue |
| LOC100526820 | blue |
| LOC100527964 | blue |
| LOC121952    | blue |
| LOC147670    | blue |
| LOC147804    | blue |
| LOC150381    | blue |
| LOC151162    | blue |
| LOC202181    | blue |
| LOC283174    | blue |
| LOC283547    | blue |
| LOC283888    | blue |
| LOC283922    | blue |
| LOC284551    | blue |
| LOC284801    | blue |
| LOC285074    | blue |
| LOC285758    | blue |
| LOC285965    | blue |
| LOC285972    | blue |
| LOC286437    | blue |
| LOC338758    | blue |
| LOC339529    | blue |
| LOC339666    | blue |
| LOC340037    | blue |
| LOC344887    | blue |
| LOC375190    | blue |
| LOC388387    | blue |
| LOC388692    | blue |
| LOC389791    | blue |

|           |      |
|-----------|------|
| LOC389906 | blue |
| LOC400236 | blue |
| LOC401097 | blue |
| LOC401320 | blue |
| LOC401588 | blue |
| LOC440104 | blue |
| LOC441454 | blue |
| LOC493754 | blue |
| LOC494141 | blue |
| LOC541471 | blue |
| LOC619207 | blue |
| LOC641298 | blue |
| LOC642236 | blue |
| LOC644246 | blue |
| LOC644961 | blue |
| LOC645513 | blue |
| LOC646329 | blue |
| LOC646471 | blue |
| LOC646903 | blue |
| LOC652276 | blue |
| LOC653160 | blue |
| LOC653566 | blue |
| LOC728190 | blue |
| LOC728377 | blue |
| LOC729013 | blue |
| LOC730091 | blue |
| LOC730227 | blue |
| LOC90784  | blue |
| LOC90834  | blue |
| LOC92249  | blue |
| LOH12CR1  | blue |
| LOH12CR2  | blue |
| LONP2     | blue |
| LPAR5     | blue |
| LPHN1     | blue |
| LPIN1     | blue |
| LPP-AS2   | blue |
| LPXN      | blue |
| LRBA      | blue |
| LRCH1     | blue |
| LRCH3     | blue |
| LRIG1     | blue |
| LRIG2     | blue |
| LRP5      | blue |
| LRP5L     | blue |
| LRP8      | blue |
| LRRC16A   | blue |
| LRRC28    | blue |
| LRRC37A2  | blue |
| LRRC37A4  | blue |
| LRRC41    | blue |
| LRRC42    | blue |
| LRRC48    | blue |
| LRRC4B    | blue |
| LRRC8A    | blue |
| LRRC8D    | blue |
| LRRIQ3    | blue |
| LRRN2     | blue |
| LSG1      | blue |
| LSM10     | blue |
| LSM14B    | blue |
| LSMD1     | blue |
| LSS       | blue |
| LST1      | blue |
| LTBP3     | blue |
| LUC7L2    | blue |
| LUZP1     | blue |
| LY6G5B    | blue |

|            |      |
|------------|------|
| LY86-AS1   | blue |
| LY9        | blue |
| LY96       | blue |
| LYPD6B     | blue |
| LYRM1      | blue |
| LYSMD2     | blue |
| LZTR1      | blue |
| LZTS2      | blue |
| M6PR       | blue |
| MACF1      | blue |
| MAD2L1BP   | blue |
| MAD2L2     | blue |
| MADD       | blue |
| MAFK       | blue |
| MAGED1     | blue |
| MAGED2     | blue |
| MAGOH      | blue |
| MAL2       | blue |
| MALAT1     | blue |
| MAMLD1     | blue |
| MAN1C1     | blue |
| MANBAL     | blue |
| MAP1A      | blue |
| MAP1LC3B2  | blue |
| MAP2K6     | blue |
| MAP2K7     | blue |
| MAP3K12    | blue |
| MAP3K4     | blue |
| MAP3K9     | blue |
| MAP4       | blue |
| MAP7D3     | blue |
| MAPK7      | blue |
| MAPK8IP3   | blue |
| MAPK9      | blue |
| MAPKAP1    | blue |
| MAPRE2     | blue |
| MAPT       | blue |
| MARS       | blue |
| MASP2      | blue |
| MATN2      | blue |
| MAVS       | blue |
| MBD1       | blue |
| MBD2       | blue |
| MBOAT4     | blue |
| MBTPS1     | blue |
| MCAM       | blue |
| MCCC1      | blue |
| MCCC2      | blue |
| MCCD1      | blue |
| MCF2L      | blue |
| MCM2       | blue |
| MCM3       | blue |
| MCM3AP     | blue |
| MCM3AP-AS1 | blue |
| MCM4       | blue |
| MCM6       | blue |
| MDC1       | blue |
| MDM4       | blue |
| MDN1       | blue |
| MDS2       | blue |
| MECP2      | blue |
| MED11      | blue |
| MED24      | blue |
| MED27      | blue |
| MED29      | blue |
| MED30      | blue |
| MED31      | blue |
| MED6       | blue |

|            |      |
|------------|------|
| MEGF6      | blue |
| MEIS2      | blue |
| MEMO1      | blue |
| MESDC2     | blue |
| METAP1     | blue |
| METTL13    | blue |
| METTL16    | blue |
| METTL2A    | blue |
| METTL2B    | blue |
| METTL7A    | blue |
| METTL7B    | blue |
| METTL9     | blue |
| MFAP1      | blue |
| MFAP4      | blue |
| MFGE8      | blue |
| MFHAS1     | blue |
| MFSD1      | blue |
| MGA        | blue |
| MGAT5      | blue |
| MGC16121   | blue |
| MGC21881   | blue |
| MGC3771    | blue |
| MGC57346   | blue |
| MGST1      | blue |
| MIAT       | blue |
| MID2       | blue |
| MILR1      | blue |
| MINK1      | blue |
| MIOX       | blue |
| MIPEP      | blue |
| MIR181A2HG | blue |
| MIR223     | blue |
| MIR5047    | blue |
| MIR7-1     | blue |
| MKL1       | blue |
| MLANA      | blue |
| MLC1       | blue |
| MLEC       | blue |
| MLH1       | blue |
| MLL        | blue |
| MLL4       | blue |
| MLLT6      | blue |
| MLXIP      | blue |
| MMACHC     | blue |
| MMADHC     | blue |
| MMEL1      | blue |
| MMGT1      | blue |
| MMP1       | blue |
| MMS19      | blue |
| MND1       | blue |
| MNS1       | blue |
| MNT        | blue |
| MORC4      | blue |
| MORN1      | blue |
| MPHOSPH8   | blue |
| MPP2       | blue |
| MPRIP      | blue |
| MPZ        | blue |
| MRPL16     | blue |
| MRPL33     | blue |
| MRPL44     | blue |
| MRPL49     | blue |
| MRPS24     | blue |
| MRPS27     | blue |
| MRPS36     | blue |
| MRPS5      | blue |
| MRPS9      | blue |
| MS4A3      | blue |

|              |      |
|--------------|------|
| MS4A4A       | blue |
| MS4A6A       | blue |
| MSH5-C6orf26 | blue |
| MSH6         | blue |
| MSI2         | blue |
| MSRB2        | blue |
| MSRB3        | blue |
| MTA1         | blue |
| MTA2         | blue |
| MTA3         | blue |
| MTCH2        | blue |
| MTHFD1       | blue |
| MTHFD1L      | blue |
| MTHFR        | blue |
| MTHFS        | blue |
| MTMR4        | blue |
| MTMR9LP      | blue |
| MTOR         | blue |
| MTPAP        | blue |
| MTR          | blue |
| MTRNR2L9     | blue |
| MTSS1L       | blue |
| MUL1         | blue |
| MXD3         | blue |
| MXRA8        | blue |
| MYBBP1A      | blue |
| MYC          | blue |
| MYCBP        | blue |
| MYCBP2       | blue |
| MYCT1        | blue |
| MYH3         | blue |
| MYH7B        | blue |
| MYO15A       | blue |
| MYO15B       | blue |
| MYO18A       | blue |
| MYO19        | blue |
| MYO1C        | blue |
| MYO1D        | blue |
| MYO1E        | blue |
| MYO5B        | blue |
| MYO9B        | blue |
| MYOM1        | blue |
| N4BP3        | blue |
| NAA40        | blue |
| NAB2         | blue |
| NACC1        | blue |
| NARS         | blue |
| NASP         | blue |
| NAT10        | blue |
| NAT8L        | blue |
| NAV1         | blue |
| NBAS         | blue |
| NBPF1        | blue |
| NBPF15       | blue |
| NBPF9        | blue |
| NCAPD2       | blue |
| NCAPD3       | blue |
| NCAPG        | blue |
| NCAPG2       | blue |
| NCKAP1L      | blue |
| NCL          | blue |
| NCOA5        | blue |
| NCOR2        | blue |
| NCR1         | blue |
| NCRNA00094   | blue |
| NCRNA00152   | blue |
| NCRNA00174   | blue |
| NCRNA00176   | blue |

|            |      |
|------------|------|
| NCRNA00202 | blue |
| NCRNA00241 | blue |
| NCRNA00255 | blue |
| NCRNA00258 | blue |
| NCRNA00292 | blue |
| NCRNA00294 | blue |
| NCRNA00299 | blue |
| NCRNA00324 | blue |
| NCRNA00341 | blue |
| NDC80      | blue |
| NDUFA10    | blue |
| NDUFA2     | blue |
| NDUFA9     | blue |
| NDUFB4     | blue |
| NDUFB6     | blue |
| NDUFS1     | blue |
| NDUFV3     | blue |
| NEAT1      | blue |
| NECAB1     | blue |
| NEDD8      | blue |
| NEFH       | blue |
| NEIL2      | blue |
| NEK9       | blue |
| NELL2      | blue |
| NEO1       | blue |
| NET1       | blue |
| NEU3       | blue |
| NEURL4     | blue |
| NEXN       | blue |
| NF2        | blue |
| NFATC2     | blue |
| NFATC2IP   | blue |
| NFATC3     | blue |
| NFE2L1     | blue |
| NFRKB      | blue |
| NFS1       | blue |
| NFX1       | blue |
| NICN1      | blue |
| NINL       | blue |
| NIPAL3     | blue |
| NIPSNAP3A  | blue |
| NISCH      | blue |
| NKAP       | blue |
| NKAPL      | blue |
| NKD1       | blue |
| NLGN2      | blue |
| NLRC3      | blue |
| NLRC5      | blue |
| NLRP1      | blue |
| NLRP7      | blue |
| NME1-NME2  | blue |
| NME6       | blue |
| NMI        | blue |
| NMT1       | blue |
| NMT2       | blue |
| NNAT       | blue |
| NNT        | blue |
| NOD1       | blue |
| NODAL      | blue |
| NOL10      | blue |
| NOL11      | blue |
| NOL9       | blue |
| NOLC1      | blue |
| NOM1       | blue |
| NONO       | blue |
| NOP10      | blue |
| NOP14      | blue |
| NPAS2      | blue |

|          |      |
|----------|------|
| NPHP4    | blue |
| NPY6R    | blue |
| NR1D1    | blue |
| NRBP2    | blue |
| NRCAM    | blue |
| NRF1     | blue |
| NRG1     | blue |
| NRG2     | blue |
| NRIP2    | blue |
| NRXN2    | blue |
| NSDHL    | blue |
| NSUN2    | blue |
| NSUN4    | blue |
| NT5E     | blue |
| NTSR1    | blue |
| NUCKS1   | blue |
| NUDT16P1 | blue |
| NUDT9    | blue |
| NUMA1    | blue |
| NUMBL    | blue |
| NUP133   | blue |
| NUP155   | blue |
| NUP188   | blue |
| NUP205   | blue |
| NUP210   | blue |
| NUP210L  | blue |
| NUP214   | blue |
| NUP62    | blue |
| NUP93    | blue |
| NXF1     | blue |
| NXN      | blue |
| NYNRIN   | blue |
| OBSCN    | blue |
| OCLM     | blue |
| OCRL     | blue |
| ODF2     | blue |
| OGDH     | blue |
| OGFOD1   | blue |
| OMG      | blue |
| OPA3     | blue |
| OR2B6    | blue |
| OR6K3    | blue |
| ORAOV1   | blue |
| ORMDL2   | blue |
| ORMDL3   | blue |
| OTOA     | blue |
| OTUD1    | blue |
| OTUD7B   | blue |
| P2RY8    | blue |
| PA2G4    | blue |
| PAAF1    | blue |
| PABPC1   | blue |
| PABPC1L  | blue |
| PABPC4   | blue |
| PACSIN1  | blue |
| PAFAH2   | blue |
| PAICS    | blue |
| PALB2    | blue |
| PALM3    | blue |
| PAM      | blue |
| PAM16    | blue |
| PAN2     | blue |
| PAN3-AS1 | blue |
| PAPD7    | blue |
| PAR5     | blue |
| PARD6A   | blue |
| PARN     | blue |
| PARP1    | blue |



|         |      |
|---------|------|
| PARP15  | blue |
| PARP6   | blue |
| PAR-SN  | blue |
| PARVA   | blue |
| PASK    | blue |
| PATZ1   | blue |
| PAXIP1  | blue |
| PCBD1   | blue |
| PCCA    | blue |
| PCCB    | blue |
| PCGF1   | blue |
| PCIF1   | blue |
| PCM1    | blue |
| PCNT    | blue |
| PCNXL2  | blue |
| PCNXL3  | blue |
| PCSK5   | blue |
| PCSK7   | blue |
| PCYOX1  | blue |
| PCYOX1L | blue |
| PDCD11  | blue |
| PDCD4   | blue |
| PDDC1   | blue |
| PDE4DIP | blue |
| PDE6H   | blue |
| PDE9A   | blue |
| PDGFC   | blue |
| PDHA1   | blue |
| PDHB    | blue |
| PDIA3   | blue |
| PDIA4   | blue |
| PDIA5   | blue |
| PDIA6   | blue |
| PDPK1   | blue |
| PDPR    | blue |
| PDXDC1  | blue |
| PDXDC2P | blue |
| PEA15   | blue |
| PEAK1   | blue |
| PEBP1   | blue |
| PER1    | blue |
| PET112  | blue |
| PEX26   | blue |
| PEX5    | blue |
| PFAS    | blue |
| PFKP    | blue |
| PFN4    | blue |
| PGAM2   | blue |
| PGPEP1  | blue |
| PHACTR4 | blue |
| PHC1    | blue |
| PHF10   | blue |
| PHF13   | blue |
| PHF15   | blue |
| PHF19   | blue |
| PHLPP2  | blue |
| PHOCN   | blue |
| PHRF1   | blue |
| PI3     | blue |
| PI4K2A  | blue |
| PI4KA   | blue |
| PI4KAP2 | blue |
| PI4KB   | blue |
| PIGO    | blue |
| PIGP    | blue |
| PIGT    | blue |
| PIGU    | blue |
| PIK3IP1 | blue |

|         |      |
|---------|------|
| PIK3R2  | blue |
| PIK3R4  | blue |
| PILRB   | blue |
| PIM3    | blue |
| PINX1   | blue |
| PIP4K2A | blue |
| PIP4K2B | blue |
| PIP5K1C | blue |
| PITPNB  | blue |
| PITPNC1 | blue |
| PITPNM2 | blue |
| PITPNM3 | blue |
| PITRM1  | blue |
| PJA1    | blue |
| PKD1    | blue |
| PKD1P1  | blue |
| PKI55   | blue |
| PKM2    | blue |
| PKN3    | blue |
| PLA2G7  | blue |
| PLAC4   | blue |
| PLAT    | blue |
| PLCD4   | blue |
| PLCG1   | blue |
| PLCH2   | blue |
| PLCXD1  | blue |
| PLD6    | blue |
| PLEC    | blue |
| PLEKHA2 | blue |
| PLEKHA7 | blue |
| PLEKHG2 | blue |
| PLIN2   | blue |
| PLLP    | blue |
| PLSCR4  | blue |
| PLXDC1  | blue |
| PLXNA1  | blue |
| PLXNA3  | blue |
| PLXNA4  | blue |
| PLXND1  | blue |
| PMEL    | blue |
| PMS2    | blue |
| PMS2CL  | blue |
| PMS2P3  | blue |
| PMS2P5  | blue |
| PNN     | blue |
| PNO1    | blue |
| PNPO    | blue |
| PNRC1   | blue |
| POFUT1  | blue |
| POFUT2  | blue |
| POGK    | blue |
| POGZ    | blue |
| POLA1   | blue |
| POLA2   | blue |
| POLB    | blue |
| POLDIP3 | blue |
| POLE    | blue |
| POLE3   | blue |
| POLG    | blue |
| POLH    | blue |
| POLR1A  | blue |
| POLR1B  | blue |
| POLR2B  | blue |
| POLR2C  | blue |
| POLR2J  | blue |
| POLR3A  | blue |
| POLR3B  | blue |
| POLR3C  | blue |

|             |      |
|-------------|------|
| POLR3E      | blue |
| POM121      | blue |
| POM121C     | blue |
| POMGNT1     | blue |
| POP1        | blue |
| POU5F1P4    | blue |
| POU6F1      | blue |
| PPARA       | blue |
| PPARD       | blue |
| PPARGC1B    | blue |
| PPCS        | blue |
| PPFIBP1     | blue |
| PPFIBP2     | blue |
| PPIEL       | blue |
| PPIL2       | blue |
| PPIP5K1     | blue |
| PPM1K       | blue |
| PPME1       | blue |
| PPP1R13B    | blue |
| PPP1R16B    | blue |
| PPP1R3E     | blue |
| PPP1R9B     | blue |
| PPP2R1B     | blue |
| PPP2R3B-AS1 | blue |
| PPP2R5C     | blue |
| PPP6R2      | blue |
| PPRC1       | blue |
| PPT2        | blue |
| PRAP1       | blue |
| PRC1        | blue |
| PRDM15      | blue |
| PRDM2       | blue |
| PRDM4       | blue |
| PREP        | blue |
| PRF1        | blue |
| PRICKLE4    | blue |
| PRKAG1      | blue |
| PRKCA       | blue |
| PRKCH       | blue |
| PRKCQ       | blue |
| PRKX        | blue |
| PRLR        | blue |
| PRMT2       | blue |
| PRO1768     | blue |
| ProSAPiP1   | blue |
| PROSER1     | blue |
| PROX2       | blue |
| PRPF19      | blue |
| PRPF3       | blue |
| PRPF4       | blue |
| PRPF40B     | blue |
| PRPF8       | blue |
| PRPS1       | blue |
| PRR12       | blue |
| PRR15L      | blue |
| PRR16       | blue |
| PRR25       | blue |
| PRRC2B      | blue |
| PRRG1       | blue |
| PRRT1       | blue |
| PRRT2       | blue |
| PRRT3       | blue |
| PRSS36      | blue |
| PSAT1       | blue |
| PSD4        | blue |
| PSENNEN     | blue |
| PSMC4       | blue |
| PSMD1       | blue |

|           |      |
|-----------|------|
| PSMD11    | blue |
| PSMD2     | blue |
| PSMD6     | blue |
| PSMD7     | blue |
| PSME4     | blue |
| PSPC1     | blue |
| PTBP1     | blue |
| PTCH2     | blue |
| PTDSS1    | blue |
| PTENP1    | blue |
| PTGFR     | blue |
| PTGFRN    | blue |
| PTK2      | blue |
| PTMA      | blue |
| PTPN13    | blue |
| PTPN18    | blue |
| PTPRA     | blue |
| PTPRN2    | blue |
| PTPRS     | blue |
| PTTG2     | blue |
| PUM1      | blue |
| PUS3      | blue |
| PWP1      | blue |
| PXMP4     | blue |
| PYGB      | blue |
| PYGO2     | blue |
| QRICH1    | blue |
| QTRTD1    | blue |
| R3HDM1    | blue |
| RAB11A    | blue |
| RAB11FIP3 | blue |
| RAB15     | blue |
| RAB24     | blue |
| RAB32     | blue |
| RAB3GAP1  | blue |
| RAB41     | blue |
| RABGAP1   | blue |
| RABIF     | blue |
| RABL2A    | blue |
| RABL2B    | blue |
| RACGAP1   | blue |
| RAD18     | blue |
| RAD51D    | blue |
| RAD54L2   | blue |
| RAI1      | blue |
| RAI14     | blue |
| RALGDS    | blue |
| RALGPS1   | blue |
| RAMP3     | blue |
| RANBP10   | blue |
| RAP1GDS1  | blue |
| RAPGEF1   | blue |
| RASA3     | blue |
| RASA4     | blue |
| RASAL3    | blue |
| RASGRF2   | blue |
| RASGRP2   | blue |
| RAVER1    | blue |
| RBBP4     | blue |
| RBBP7     | blue |
| RBFox2    | blue |
| RBL2      | blue |
| RBM14     | blue |
| RBM15B    | blue |
| RBM17     | blue |
| RBM19     | blue |
| RBM26     | blue |
| RBM28     | blue |

|                 |      |
|-----------------|------|
| RBM33           | blue |
| RBM4B           | blue |
| RBM6            | blue |
| RBP7            | blue |
| RC3H2           | blue |
| RCAN1           | blue |
| RCAN3           | blue |
| RCC2            | blue |
| RCCD1           | blue |
| RCL1            | blue |
| RCN1            | blue |
| RDH11           | blue |
| RDH13           | blue |
| RDH5            | blue |
| REL             | blue |
| RELA            | blue |
| REPS1           | blue |
| RETN            | blue |
| RETSAT          | blue |
| REXO1           | blue |
| RFC1            | blue |
| RFT1            | blue |
| RFTN1           | blue |
| RFWD3           | blue |
| RFX5            | blue |
| RG9MTD3         | blue |
| RGMB            | blue |
| RGS13           | blue |
| RGS17           | blue |
| RHBDD1          | blue |
| RHOBTB2         | blue |
| RHOF            | blue |
| RIMBP3          | blue |
| RIMS3           | blue |
| RIOK1           | blue |
| RLTPR           | blue |
| RMRP            | blue |
| RNASE2          | blue |
| RNASE3          | blue |
| RNASE4          | blue |
| RNASEH1         | blue |
| RNASEK-C17ORF49 | blue |
| RNF125          | blue |
| RNF144A         | blue |
| RNF157          | blue |
| RNF175          | blue |
| RNF20           | blue |
| RNF214          | blue |
| RNF216          | blue |
| RNF224          | blue |
| RNF4            | blue |
| RNF43           | blue |
| RNF44           | blue |
| RNF8            | blue |
| RNFT2           | blue |
| RNMT            | blue |
| RNPS1           | blue |
| RP1L1           | blue |
| RPA1            | blue |
| RPA2            | blue |
| RPAP1           | blue |
| RPL13P5         | blue |
| RPL21           | blue |
| RPL21P44        | blue |
| RPL23AP64       | blue |
| RPN2            | blue |
| RPP14           | blue |
| RPP21           | blue |

|           |      |
|-----------|------|
| RPRD1B    | blue |
| RPS15AP10 | blue |
| RPS6KA2   | blue |
| RRAGA     | blue |
| RREB1     | blue |
| RRM1      | blue |
| RRN3      | blue |
| RRN3P3    | blue |
| RRP1B     | blue |
| RSL1D1    | blue |
| RTN4IP1   | blue |
| RTTN      | blue |
| RUNX1     | blue |
| RUNX2     | blue |
| RUNX3     | blue |
| RUSC1-AS1 | blue |
| RUVBL1    | blue |
| RXFP4     | blue |
| RYR2      | blue |
| S100A12   | blue |
| S100A6    | blue |
| S100A8    | blue |
| S100A9    | blue |
| SAE1      | blue |
| SALL2     | blue |
| SAMD10    | blue |
| SAMD12    | blue |
| SAMD13    | blue |
| SAMM50    | blue |
| SAP30     | blue |
| SARM1     | blue |
| SARS      | blue |
| SART3     | blue |
| SATB1     | blue |
| SBF1      | blue |
| SBK1      | blue |
| SCAF1     | blue |
| SCAF4     | blue |
| SCAF8     | blue |
| SCAMP4    | blue |
| SCAMP5    | blue |
| SCAND2    | blue |
| SCAPER    | blue |
| SCARNA10  | blue |
| SCARNA17  | blue |
| SCARNA2   | blue |
| SCCPDH    | blue |
| SCD       | blue |
| SCFD2     | blue |
| SCMH1     | blue |
| SCN7A     | blue |
| SCO1      | blue |
| SCO2      | blue |
| SCRG1     | blue |
| SCRIB     | blue |
| SCRN1     | blue |
| SCUBE3    | blue |
| SDAD1     | blue |
| SDF2      | blue |
| SDHA      | blue |
| SDHAP1    | blue |
| SDHB      | blue |
| SDK2      | blue |
| SEC14L2   | blue |
| SEC24C    | blue |
| SEC31B    | blue |
| SEC61B    | blue |
| SECISBP2  | blue |

|          |      |
|----------|------|
| SEH1L    | blue |
| SELR1    | blue |
| SEMA4C   | blue |
| SEMA4G   | blue |
| SENP5    | blue |
| SENP8    | blue |
| SEPHS2   | blue |
| SEPN1    | blue |
| SERINC4  | blue |
| SERINC5  | blue |
| SERPINB2 | blue |
| SERPINB6 | blue |
| SERPINC1 | blue |
| SERPIND1 | blue |
| SERPINE2 | blue |
| SERPINI2 | blue |
| SETD1A   | blue |
| SETD5    | blue |
| SETD6    | blue |
| SEZ6     | blue |
| SF1      | blue |
| SF3A3    | blue |
| SF3B2    | blue |
| SF3B3    | blue |
| SF11     | blue |
| SFMBT1   | blue |
| SFMBT2   | blue |
| SFPQ     | blue |
| SFRP5    | blue |
| SFT2D1   | blue |
| SFXN1    | blue |
| SFXN2    | blue |
| SFXN3    | blue |
| SGK1     | blue |
| SGK196   | blue |
| SGK223   | blue |
| SGK494   | blue |
| SGPP2    | blue |
| SGSH     | blue |
| SGSM2    | blue |
| SH2B1    | blue |
| SH2D4B   | blue |
| SH3BP4   | blue |
| SH3BP5   | blue |
| SH3GL1P1 | blue |
| SH3PXD2A | blue |
| SHANK1   | blue |
| SHC1     | blue |
| SHMT1    | blue |
| SHPK     | blue |
| SIDT1    | blue |
| SIDT2    | blue |
| SIGMAR1  | blue |
| SIK1     | blue |
| SIK2     | blue |
| SIN3B    | blue |
| SIPA1L3  | blue |
| SIRPG    | blue |
| SKAP1    | blue |
| SLA2     | blue |
| SLAMF1   | blue |
| SLC10A1  | blue |
| SLC12A3  | blue |
| SLC12A4  | blue |
| SLC13A4  | blue |
| SLC16A1  | blue |
| SLC1A4   | blue |
| SLC20A2  | blue |

|          |      |
|----------|------|
| SLC22A23 | blue |
| SLC23A2  | blue |
| SLC23A3  | blue |
| SLC24A1  | blue |
| SLC25A12 | blue |
| SLC25A15 | blue |
| SLC25A23 | blue |
| SLC25A27 | blue |
| SLC25A42 | blue |
| SLC25A45 | blue |
| SLC26A1  | blue |
| SLC26A7  | blue |
| SLC2A1   | blue |
| SLC34A3  | blue |
| SLC35B1  | blue |
| SLC35D1  | blue |
| SLC35E2  | blue |
| SLC35E2B | blue |
| SLC35F2  | blue |
| SLC35G6  | blue |
| SLC37A1  | blue |
| SLC39A14 | blue |
| SLC41A1  | blue |
| SLC46A1  | blue |
| SLC4A1AP | blue |
| SLC4A3   | blue |
| SLC4A5   | blue |
| SLC6A16  | blue |
| SLC7A1   | blue |
| SLC7A5P2 | blue |
| SLC7A6   | blue |
| SLC9A3   | blue |
| SLC9A5   | blue |
| SLC9A9   | blue |
| SLFN12L  | blue |
| SLFN13   | blue |
| SLFN5    | blue |
| SLFNL1   | blue |
| SLITRK4  | blue |
| SLPI     | blue |
| SLTM     | blue |
| SLX4     | blue |
| SMAD3    | blue |
| SMARCA4  | blue |
| SMARCAL1 | blue |
| SMARCC1  | blue |
| SMARCC2  | blue |
| SMARCD1  | blue |
| SMARCD3  | blue |
| SMARCE1  | blue |
| SMC1A    | blue |
| SMCR7L   | blue |
| SMG6     | blue |
| SMS      | blue |
| SMU1     | blue |
| SMYD3    | blue |
| SMYD4    | blue |
| SNAP47   | blue |
| SNAPC4   | blue |
| SNAPIN   | blue |
| SND1     | blue |
| SNED1    | blue |
| SNHG9    | blue |
| SNORA24  | blue |
| SNORA25  | blue |
| SNORA48  | blue |
| SNORA57  | blue |
| SNORA72  | blue |



|            |      |
|------------|------|
| SNPH       | blue |
| SNRNP200   | blue |
| SNRNP40    | blue |
| SNRNP70    | blue |
| SNW1       | blue |
| SNX29      | blue |
| SNX6       | blue |
| SNX9       | blue |
| SOCS7      | blue |
| SOLH       | blue |
| SON        | blue |
| SORCS2     | blue |
| SOX10      | blue |
| SOX18      | blue |
| SP140L     | blue |
| SPAG1      | blue |
| SPATA5     | blue |
| SPATS2     | blue |
| SPDYE1     | blue |
| SPDYE3     | blue |
| SPDYE5     | blue |
| SPDYE6     | blue |
| SPECC1L    | blue |
| SPG11      | blue |
| SPG7       | blue |
| SPINK8     | blue |
| SPN        | blue |
| SPOCK2     | blue |
| SPON1      | blue |
| SPRNP1     | blue |
| SPTAN1     | blue |
| SPTBN1     | blue |
| SRBD1      | blue |
| SRCAP      | blue |
| SREBF2     | blue |
| SRGAP1     | blue |
| SRGN       | blue |
| SRP68      | blue |
| SRPK3      | blue |
| SRRM1      | blue |
| SRRM2      | blue |
| SRRM5      | blue |
| SRRT       | blue |
| SRSF5      | blue |
| SSBP2      | blue |
| SSRP1      | blue |
| SSTR3      | blue |
| ST13       | blue |
| ST20       | blue |
| ST3GAL1    | blue |
| ST3GAL6    | blue |
| ST6GAL1    | blue |
| ST6GALNAC3 | blue |
| STAG3L1    | blue |
| STAG3L2    | blue |
| STAG3L3    | blue |
| STAR       | blue |
| STARD7     | blue |
| STARD9     | blue |
| STIM1      | blue |
| STIP1      | blue |
| STK16      | blue |
| STK36      | blue |
| STK38      | blue |
| STK39      | blue |
| STX17      | blue |
| STX1B      | blue |
| STXBP1     | blue |

|          |      |
|----------|------|
| STXBP6   | blue |
| SUFU     | blue |
| SUGP2    | blue |
| SUN2     | blue |
| SUPT16H  | blue |
| SUPT4H1  | blue |
| SUPT6H   | blue |
| SUPV3L1  | blue |
| SURF4    | blue |
| SUSD4    | blue |
| SV2A     | blue |
| SVOPL    | blue |
| SYCE2    | blue |
| SYDE1    | blue |
| SYF2     | blue |
| SYNE1    | blue |
| SYNE2    | blue |
| SYNGAP1  | blue |
| SYNJ2    | blue |
| SYNRG    | blue |
| SYT15    | blue |
| SYVN1    | blue |
| SZT2     | blue |
| TAC4     | blue |
| TADA2A   | blue |
| TAF1     | blue |
| TAF10    | blue |
| TAF1C    | blue |
| TAF3     | blue |
| TAF6     | blue |
| TAF8     | blue |
| TAMM41   | blue |
| TAOK2    | blue |
| TARDBP   | blue |
| TARS     | blue |
| TAS2R3   | blue |
| TAS2R4   | blue |
| TATDN2   | blue |
| TAX1BP3  | blue |
| TBC1D16  | blue |
| TBC1D22B | blue |
| TBC1D24  | blue |
| TBC1D7   | blue |
| TBC1D9B  | blue |
| TBCC     | blue |
| TBCCD1   | blue |
| TBP      | blue |
| TBX19    | blue |
| TCEAL4   | blue |
| TCEANC2  | blue |
| TCEB1    | blue |
| TCEB3    | blue |
| TCF3     | blue |
| TCF7     | blue |
| TCF7L2   | blue |
| TCFL5    | blue |
| TCHP     | blue |
| TCOF1    | blue |
| TCP1     | blue |
| TCP11L1  | blue |
| TCTN2    | blue |
| TCTN3    | blue |
| TDP1     | blue |
| TDRKH    | blue |
| TEAD2    | blue |
| TECPR1   | blue |
| TEF      | blue |
| TEP1     | blue |

|                 |      |
|-----------------|------|
| TERF2           | blue |
| TERF2IP         | blue |
| TES             | blue |
| TEX10           | blue |
| TEX12           | blue |
| TEX2            | blue |
| TFCP2L1         | blue |
| TFDP2           | blue |
| TFF3            | blue |
| TFIP11          | blue |
| TGFBRAP1        | blue |
| TGIF2           | blue |
| TGS1            | blue |
| TH1L            | blue |
| THADA           | blue |
| THEM4           | blue |
| THOC1           | blue |
| THOC2           | blue |
| THRA            | blue |
| THTPA           | blue |
| THUMPD3         | blue |
| TIAF1           | blue |
| TIAM1           | blue |
| TIGD4           | blue |
| TIMD4           | blue |
| TIMELESS        | blue |
| TIMM17B         | blue |
| TKTL1           | blue |
| TLCD2           | blue |
| TLE1            | blue |
| TLR8-AS1        | blue |
| TM4SF1          | blue |
| TMC6            | blue |
| TMC8            | blue |
| TMCO7           | blue |
| TMED11P         | blue |
| TMED4           | blue |
| TMEM106A        | blue |
| TMEM109         | blue |
| TMEM110         | blue |
| TMEM120B        | blue |
| TMEM14E         | blue |
| TMEM155         | blue |
| TMEM191B        | blue |
| TMEM192         | blue |
| TMEM208         | blue |
| TMEM214         | blue |
| TMEM216         | blue |
| TMEM229B        | blue |
| TMEM25          | blue |
| TMEM44          | blue |
| TMEM57          | blue |
| TMEM59          | blue |
| TMEM60          | blue |
| TMEM63A         | blue |
| TMOD4           | blue |
| TNF             | blue |
| TNFAIP1         | blue |
| TNFAIP8L1       | blue |
| TNFAIP8L2-SCNM1 | blue |
| TNFRSF10A       | blue |
| TNFRSF11A       | blue |
| TNFRSF14        | blue |
| TNFRSF17        | blue |
| TNFRSF21        | blue |
| TNIK            | blue |
| TNK2            | blue |
| TNKS1BP1        | blue |

|          |      |
|----------|------|
| TNNC2    | blue |
| TNNI2    | blue |
| TNNT1    | blue |
| TNPO2    | blue |
| TNRC18   | blue |
| TNRC6A   | blue |
| TNRC6B   | blue |
| TNRC6C   | blue |
| TNS4     | blue |
| TNXB     | blue |
| TOB2     | blue |
| TOM1L2   | blue |
| TOMM34   | blue |
| TOP1P1   | blue |
| TOP2B    | blue |
| TP53     | blue |
| TP53BP1  | blue |
| TP53I3   | blue |
| TP73-AS1 | blue |
| TPCN1    | blue |
| TP11P2   | blue |
| TPMT     | blue |
| TPPP     | blue |
| TRAF1    | blue |
| TRAF3    | blue |
| TRAF3IP1 | blue |
| TRAF3IP2 | blue |
| TRAF3IP3 | blue |
| TRAM2    | blue |
| TRAPPC10 | blue |
| TREML3   | blue |
| TRIM14   | blue |
| TRIM16   | blue |
| TRIM17   | blue |
| TRIM26   | blue |
| TRIM35   | blue |
| TRIM4    | blue |
| TRIM44   | blue |
| TRIM56   | blue |
| TRIM62   | blue |
| TRIM65   | blue |
| TRIM66   | blue |
| TRIM68   | blue |
| TRIO     | blue |
| TRIP4    | blue |
| TRIT1    | blue |
| TRMT2B   | blue |
| TRPC2    | blue |
| TRPC3    | blue |
| TRPV1    | blue |
| TRRAP    | blue |
| TSC1     | blue |
| TSFM     | blue |
| TSGA14   | blue |
| TSHZ1    | blue |
| TSHZ2    | blue |
| TSNARE1  | blue |
| TSPAN14  | blue |
| TSPAN18  | blue |
| TSPYL2   | blue |
| TSR1     | blue |
| TSR2     | blue |
| TSSK3    | blue |
| TSSK4    | blue |
| TSTD2    | blue |
| TTC1     | blue |
| TTC17    | blue |
| TTC21A   | blue |

|           |      |
|-----------|------|
| TTC24     | blue |
| TTC27     | blue |
| TTC28     | blue |
| TTC3      | blue |
| TTC31     | blue |
| TTC9      | blue |
| TTF1      | blue |
| TTL       | blue |
| TLL3      | blue |
| TLL5      | blue |
| TPAL      | blue |
| TTYH2     | blue |
| TTYH3     | blue |
| TUB       | blue |
| TUBA3D    | blue |
| TUBB      | blue |
| TUBB4     | blue |
| TUBGCP4   | blue |
| TUBGCP5   | blue |
| TUBGCP6   | blue |
| TUG1      | blue |
| TULP3     | blue |
| TULP4     | blue |
| TUSC2     | blue |
| TXK       | blue |
| TXLNA     | blue |
| TXLNG     | blue |
| TXN       | blue |
| TXNDC11   | blue |
| TXNRD3    | blue |
| TYK2      | blue |
| TYW1      | blue |
| U2AF1L4   | blue |
| U2AF2     | blue |
| UBE2B     | blue |
| UBE2D2    | blue |
| UBE2F     | blue |
| UBE2G2    | blue |
| UBE2I     | blue |
| UBE2L3    | blue |
| UBE2Q1    | blue |
| UBE2Q2P1  | blue |
| UBE2Z     | blue |
| UBE3C     | blue |
| UBFD1     | blue |
| UBIAD1    | blue |
| UBQLN4    | blue |
| UBR4      | blue |
| UBR7      | blue |
| UBTF      | blue |
| UBXN7     | blue |
| UCK2      | blue |
| UCKL1-AS1 | blue |
| UFD1L     | blue |
| UGT2B28   | blue |
| UHRF1     | blue |
| UHRF1BP1  | blue |
| ULK2      | blue |
| UNC119B   | blue |
| UNC13B    | blue |
| UNC5CL    | blue |
| UNG       | blue |
| UNK       | blue |
| UNKL      | blue |
| URB1      | blue |
| URB2      | blue |
| USP11     | blue |
| USP13     | blue |

|         |      |
|---------|------|
| USP20   | blue |
| USP24   | blue |
| USP27X  | blue |
| USP35   | blue |
| USP36   | blue |
| USP39   | blue |
| USP40   | blue |
| USP48   | blue |
| USP54   | blue |
| USP7    | blue |
| UTP14A  | blue |
| UTP20   | blue |
| UTRN    | blue |
| UXS1    | blue |
| VAMP1   | blue |
| VANGL2  | blue |
| VASH1   | blue |
| VASN    | blue |
| VAT1    | blue |
| VAV2    | blue |
| VCP     | blue |
| VDAC1   | blue |
| VDAC2   | blue |
| VGLL4   | blue |
| VHL     | blue |
| VIPR1   | blue |
| VMAC    | blue |
| VNN3    | blue |
| VOPP1   | blue |
| VPRBP   | blue |
| VPS11   | blue |
| VPS13D  | blue |
| VPS24   | blue |
| VPS26B  | blue |
| VPS33A  | blue |
| VPS39   | blue |
| VPS45   | blue |
| VPS52   | blue |
| VPS53   | blue |
| VWA3A   | blue |
| VWA5A   | blue |
| WBP1    | blue |
| WBP11   | blue |
| WDFY2   | blue |
| WDR11   | blue |
| WDR27   | blue |
| WDR3    | blue |
| WDR33   | blue |
| WDR37   | blue |
| WDR4    | blue |
| WDR45L  | blue |
| WDR52   | blue |
| WDR55   | blue |
| WDR59   | blue |
| WDR6    | blue |
| WDR60   | blue |
| WDR67   | blue |
| WDR70   | blue |
| WHAMM   | blue |
| WHSC1   | blue |
| WIZ     | blue |
| WRNIP1  | blue |
| WSB2    | blue |
| XBP1    | blue |
| XKRX    | blue |
| XPC     | blue |
| XPNPEP1 | blue |
| XPNPEP3 | blue |

|         |      |
|---------|------|
| XPO5    | blue |
| XRCC3   | blue |
| XRCC5   | blue |
| XRCC6   | blue |
| XYL2    | blue |
| YARS    | blue |
| YEATS2  | blue |
| YLPM1   | blue |
| YWHAE   | blue |
| ZBED2   | blue |
| ZBED3   | blue |
| ZBED4   | blue |
| ZBED6   | blue |
| ZBTB16  | blue |
| ZBTB22  | blue |
| ZBTB3   | blue |
| ZBTB39  | blue |
| ZBTB4   | blue |
| ZBTB40  | blue |
| ZBTB46  | blue |
| ZBTB7A  | blue |
| ZBTB9   | blue |
| ZC3H12B | blue |
| ZC3H12D | blue |
| ZC3H14  | blue |
| ZC3H18  | blue |
| ZC3H7B  | blue |
| ZC4H2   | blue |
| ZCCHC11 | blue |
| ZCCHC14 | blue |
| ZCWPW2  | blue |
| ZDHHC11 | blue |
| ZDHHC12 | blue |
| ZDHHC8  | blue |
| ZDHHC9  | blue |
| ZFH2    | blue |
| ZFP41   | blue |
| ZFP64   | blue |
| ZFYVE20 | blue |
| ZFYVE21 | blue |
| ZFYVE26 | blue |
| ZFYVE9  | blue |
| ZHX2    | blue |
| ZHX3    | blue |
| ZKSCAN1 | blue |
| ZKSCAN2 | blue |
| ZKSCAN5 | blue |
| ZMIZ2   | blue |
| ZMYM3   | blue |
| ZMYM4   | blue |
| ZMYND12 | blue |
| ZMYND8  | blue |
| ZNF101  | blue |
| ZNF135  | blue |
| ZNF137P | blue |
| ZNF142  | blue |
| ZNF154  | blue |
| ZNF207  | blue |
| ZNF212  | blue |
| ZNF233  | blue |
| ZNF236  | blue |
| ZNF263  | blue |
| ZNF264  | blue |
| ZNF275  | blue |
| ZNF276  | blue |
| ZNF3    | blue |
| ZNF317  | blue |
| ZNF318  | blue |

|           |      |
|-----------|------|
| ZNF320    | blue |
| ZNF324    | blue |
| ZNF330    | blue |
| ZNF335    | blue |
| ZNF337    | blue |
| ZNF346    | blue |
| ZNF362    | blue |
| ZNF395    | blue |
| ZNF397    | blue |
| ZNF417    | blue |
| ZNF445    | blue |
| ZNF460    | blue |
| ZNF469    | blue |
| ZNF490    | blue |
| ZNF496    | blue |
| ZNF498    | blue |
| ZNF512    | blue |
| ZNF512B   | blue |
| ZNF513    | blue |
| ZNF541    | blue |
| ZNF543    | blue |
| ZNF549    | blue |
| ZNF557    | blue |
| ZNF562    | blue |
| ZNF580    | blue |
| ZNF584    | blue |
| ZNF587    | blue |
| ZNF589    | blue |
| ZNF598    | blue |
| ZNF611    | blue |
| ZNF619    | blue |
| ZNF621    | blue |
| ZNF623    | blue |
| ZNF629    | blue |
| ZNF689    | blue |
| ZNF696    | blue |
| ZNF70     | blue |
| ZNF732    | blue |
| ZNF74     | blue |
| ZNF740    | blue |
| ZNF76     | blue |
| ZNF763    | blue |
| ZNF767    | blue |
| ZNF783    | blue |
| ZNF785    | blue |
| ZNF786    | blue |
| ZNF792    | blue |
| ZNF793    | blue |
| ZNF8      | blue |
| ZNF808    | blue |
| ZNF814    | blue |
| ZNF815    | blue |
| ZNF827    | blue |
| ZNF828    | blue |
| ZNF835    | blue |
| ZNF862    | blue |
| ZNF878    | blue |
| ZNFX1-AS1 | blue |
| ZNHIT6    | blue |
| ZP1       | blue |
| ZRSR2     | blue |
| ZSCAN16   | blue |
| ZSCAN2    | blue |
| ZSCAN21   | blue |
| ZSCAN22   | blue |
| ZSCAN29   | blue |
| ZW10      | blue |
| ZXDC      | blue |



8-Mar brown

|             |       |
|-------------|-------|
| 1/2-SBSRNA4 | brown |
| AATF        | brown |
| AATK        | brown |
| ABAT        | brown |
| ABCA11P     | brown |
| ABCA17P     | brown |
| ABCC5       | brown |
| ABCC6       | brown |
| ABCG1       | brown |
| ABHD2       | brown |
| ABHD4       | brown |
| ACIN1       | brown |
| ACO1        | brown |
| ACOX1       | brown |
| ACP1        | brown |
| ACRC        | brown |
| ACSM1       | brown |
| ACSM3       | brown |
| ACSS2       | brown |
| ACTA1       | brown |
| ACTB        | brown |
| ACTG1       | brown |
| ACTN1       | brown |
| ACVR1B      | brown |
| ACYP1       | brown |
| ACYP2       | brown |
| ADAL        | brown |
| ADAM19      | brown |
| ADAMTSL4    | brown |
| ADAP2       | brown |
| ADAR        | brown |
| ADCY4       | brown |
| ADH5        | brown |
| ADK         | brown |
| ADO         | brown |
| ADPRH       | brown |
| ADRBK2      | brown |
| ADSL        | brown |
| AFAP1       | brown |
| AFF2        | brown |
| AGA         | brown |
| AGBL2       | brown |
| AGPAT1      | brown |
| AHI1        | brown |
| AKAP13      | brown |
| AKR1C3      | brown |
| ALAS1       | brown |
| ALB         | brown |
| ALDH1A1     | brown |
| ALDH2       | brown |
| ALDH3B1     | brown |
| ALDH9A1     | brown |
| ALDOC       | brown |
| ALG14       | brown |
| ALG1L2      | brown |
| ALG5        | brown |
| ALKBH2      | brown |
| ALKBH3      | brown |
| ALOX15B     | brown |
| ALPK1       | brown |
| ALPK3       | brown |
| ALPL        | brown |
| AMICA1      | brown |
| AMIGO2      | brown |
| AMPD3       | brown |
| AMY2B       | brown |
| AMZ2        | brown |

|            |       |
|------------|-------|
| AMZ2P1     | brown |
| ANAPC16    | brown |
| ANAPC4     | brown |
| ANKFY1     | brown |
| ANKRA2     | brown |
| ANKRD13A   | brown |
| ANKRD29    | brown |
| ANKRD31    | brown |
| ANKRD36BP2 | brown |
| ANKRD37    | brown |
| ANKRD39    | brown |
| ANKS1A     | brown |
| ANO10      | brown |
| ANO7       | brown |
| ANP32A     | brown |
| ANPEP      | brown |
| ANXA11     | brown |
| ANXA4      | brown |
| ANXA5      | brown |
| ANXA7      | brown |
| ANXA9      | brown |
| AOAH       | brown |
| AOC2       | brown |
| AP1M1      | brown |
| AP2A1      | brown |
| AP2M1      | brown |
| AP3B1      | brown |
| APBB1IP    | brown |
| APC2       | brown |
| APITD1     | brown |
| APLP2      | brown |
| APOA1      | brown |
| APOBEC3C   | brown |
| APOBR      | brown |
| APP        | brown |
| ARAP1      | brown |
| ARAP3      | brown |
| ARCN1      | brown |
| ARF1       | brown |
| ARF3       | brown |
| ARF6       | brown |
| ARFGAP3    | brown |
| ARGFXP2    | brown |
| ARHGAP1    | brown |
| ARHGAP21   | brown |
| ARHGAP23   | brown |
| ARHGAP24   | brown |
| ARHGAP25   | brown |
| ARHGAP26   | brown |
| ARHGAP27   | brown |
| ARHGAP30   | brown |
| ARHGAP31   | brown |
| ARHGDIB    | brown |
| ARHGEF10   | brown |
| ARHGEF11   | brown |
| ARHGEF12   | brown |
| ARID1A     | brown |
| ARID3A     | brown |
| ARID3B     | brown |
| ARL1       | brown |
| ARL6       | brown |
| ARNT       | brown |
| ARSD       | brown |
| ARSG       | brown |
| ASAH1      | brown |
| ASAP1-IT1  | brown |
| ASB8       | brown |
| ASB9P1     | brown |

|           |       |
|-----------|-------|
| ASCC2     | brown |
| ASH2L     | brown |
| ASPRV1    | brown |
| ATF5      | brown |
| ATF7      | brown |
| ATG2A     | brown |
| ATG7      | brown |
| ATP2B4    | brown |
| ATP5S     | brown |
| ATP6V0A1  | brown |
| ATP6V0C   | brown |
| ATP6V0D1  | brown |
| ATP6V1B2  | brown |
| ATPIF1    | brown |
| ATXN2     | brown |
| B3GNT9    | brown |
| B4GALT1   | brown |
| B4GALT4   | brown |
| B4GALT5   | brown |
| BASP1     | brown |
| BAZ2A     | brown |
| BBS4      | brown |
| BCAS3     | brown |
| BCCIP     | brown |
| BCDIN3D   | brown |
| BCKDHA    | brown |
| BCL2L13   | brown |
| BCL6      | brown |
| BCL9      | brown |
| BCO2      | brown |
| BCOR      | brown |
| BCORL1    | brown |
| BDNF-AS1  | brown |
| BEAN1     | brown |
| BECN1     | brown |
| BEND3     | brown |
| BEX2      | brown |
| BEX5      | brown |
| BHLHE40   | brown |
| BICD2     | brown |
| BIN2      | brown |
| BIVM      | brown |
| BLOC1S3   | brown |
| BNIP3     | brown |
| BOD1      | brown |
| BOLA3     | brown |
| BPNT1     | brown |
| BRAP      | brown |
| BRCA1     | brown |
| BRD3      | brown |
| BRD4      | brown |
| BRD8      | brown |
| BRE       | brown |
| BRIX1     | brown |
| BRP44     | brown |
| BRPF3     | brown |
| BSCL2     | brown |
| BSG       | brown |
| BTBD19    | brown |
| BTBD9     | brown |
| BTG2      | brown |
| BTG3      | brown |
| BTK       | brown |
| BTN3A1    | brown |
| BUB3      | brown |
| BZW2      | brown |
| C10orf10  | brown |
| C10orf105 | brown |

|           |       |
|-----------|-------|
| C10orf12  | brown |
| C10orf26  | brown |
| C10orf54  | brown |
| C10orf88  | brown |
| C11orf31  | brown |
| C11orf42  | brown |
| C11orf51  | brown |
| C11orf73  | brown |
| C12orf24  | brown |
| C12orf32  | brown |
| C12orf41  | brown |
| C12orf47  | brown |
| C12orf57  | brown |
| C12orf62  | brown |
| C12orf73  | brown |
| C12orf76  | brown |
| C13orf27  | brown |
| C14orf128 | brown |
| C14orf149 | brown |
| C14orf159 | brown |
| C14orf64  | brown |
| C14orf79  | brown |
| C15orf33  | brown |
| C15orf38  | brown |
| C15orf39  | brown |
| C15orf40  | brown |
| C15orf57  | brown |
| C15orf61  | brown |
| C16orf54  | brown |
| C16orf57  | brown |
| C16orf70  | brown |
| C16orf91  | brown |
| C16orf95  | brown |
| C17orf100 | brown |
| C17orf103 | brown |
| C17orf108 | brown |
| C17orf48  | brown |
| C17orf63  | brown |
| C17orf85  | brown |
| C17orf87  | brown |
| C17orf89  | brown |
| C18orf18  | brown |
| C18orf55  | brown |
| C18orf8   | brown |
| C19orf12  | brown |
| C19orf22  | brown |
| C19orf42  | brown |
| C19orf73  | brown |
| C19orf79  | brown |
| C1orf101  | brown |
| C1orf135  | brown |
| C1orf151  | brown |
| C1orf183  | brown |
| C1orf213  | brown |
| C1orf216  | brown |
| C1orf228  | brown |
| C1orf31   | brown |
| C1orf38   | brown |
| C1orf54   | brown |
| C1QTNF3   | brown |
| C1RL      | brown |
| C20orf11  | brown |
| C20orf20  | brown |
| C20orf3   | brown |
| C20orf30  | brown |
| C20orf43  | brown |
| C20orf7   | brown |
| C21orf119 | brown |

|           |       |
|-----------|-------|
| C21orf122 | brown |
| C21orf49  | brown |
| C22orf32  | brown |
| C22orf39  | brown |
| C2orf18   | brown |
| C2orf28   | brown |
| C2orf29   | brown |
| C2orf3    | brown |
| C2orf56   | brown |
| C2orf63   | brown |
| C2orf84   | brown |
| C3        | brown |
| C3orf25   | brown |
| C3orf26   | brown |
| C3orf33   | brown |
| C3orf52   | brown |
| C3orf62   | brown |
| C3orf71   | brown |
| C3orf78   | brown |
| C4BPB     | brown |
| C4orf43   | brown |
| C5AR1     | brown |
| C5orf28   | brown |
| C5orf34   | brown |
| C5orf39   | brown |
| C5orf55   | brown |
| C6orf115  | brown |
| C6orf125  | brown |
| C6orf130  | brown |
| C6orf170  | brown |
| C6orf225  | brown |
| C6orf27   | brown |
| C6orf48   | brown |
| C6orf57   | brown |
| C6orf64   | brown |
| C6orf70   | brown |
| C6orf89   | brown |
| C7orf11   | brown |
| C7orf13   | brown |
| C7orf23   | brown |
| C7orf30   | brown |
| C7orf46   | brown |
| C7orf47   | brown |
| C7orf54   | brown |
| C7orf55   | brown |
| C7orf57   | brown |
| C7orf68   | brown |
| C7orf70   | brown |
| C8orf38   | brown |
| C8orf41   | brown |
| C8orf76   | brown |
| C8orf77   | brown |
| C9orf103  | brown |
| C9orf123  | brown |
| C9orf131  | brown |
| C9orf163  | brown |
| C9orf25   | brown |
| C9orf30   | brown |
| C9orf40   | brown |
| C9orf84   | brown |
| C9orf95   | brown |
| CA13      | brown |
| CA14      | brown |
| CA3       | brown |
| CA6       | brown |
| CABLES2   | brown |
| CACNA2D4  | brown |
| CACNG8    | brown |

|          |       |
|----------|-------|
| CADM4    | brown |
| CALCOCO1 | brown |
| CALCOCO2 | brown |
| CAMK1D   | brown |
| CAMK2G   | brown |
| CAMKK2   | brown |
| CAMTA1   | brown |
| CANT1    | brown |
| CAP1     | brown |
| CAPN1    | brown |
| CAPNS1   | brown |
| CAPZB    | brown |
| CARM1    | brown |
| CARS     | brown |
| CASC3    | brown |
| CASP6    | brown |
| CASP9    | brown |
| CASS4    | brown |
| CAST     | brown |
| CASZ1    | brown |
| CBFA2T3  | brown |
| CBL      | brown |
| CBR3     | brown |
| CBX1     | brown |
| CBX6     | brown |
| CBY1     | brown |
| CC2D2A   | brown |
| CCBL1    | brown |
| CCDC102B | brown |
| CCDC109B | brown |
| CCDC111  | brown |
| CCDC135  | brown |
| CCDC149  | brown |
| CCDC152  | brown |
| CCDC167  | brown |
| CCDC36   | brown |
| CCDC69   | brown |
| CCDC99   | brown |
| CCL3     | brown |
| CCNB1IP1 | brown |
| CCNK     | brown |
| CCRN4L   | brown |
| CCT6P1   | brown |
| CCT6P3   | brown |
| CD101    | brown |
| CD14     | brown |
| CD163    | brown |
| CD1C     | brown |
| CD1D     | brown |
| CD209    | brown |
| CD300C   | brown |
| CD300E   | brown |
| CD300LB  | brown |
| CD300LF  | brown |
| CD3D     | brown |
| CD44     | brown |
| CD53     | brown |
| CD68     | brown |
| CD82     | brown |
| CD86     | brown |
| CD93     | brown |
| CD97     | brown |
| CDC42    | brown |
| CDC42EP4 | brown |
| CDC42SE1 | brown |
| CDC5L    | brown |
| CDCA4    | brown |
| CDCP1    | brown |

|            |       |
|------------|-------|
| CDH1       | brown |
| CDKL3      | brown |
| CDKN2AIPNL | brown |
| CDNF       | brown |
| CDV3       | brown |
| CECR6      | brown |
| CELA1      | brown |
| CELF3      | brown |
| CENPH      | brown |
| CERKL      | brown |
| CERS2      | brown |
| CES1       | brown |
| CFL1       | brown |
| CFL2       | brown |
| CFLAR      | brown |
| CFLAR-AS1  | brown |
| CHCHD1     | brown |
| CHCHD2     | brown |
| CHCHD6     | brown |
| CHCHD7     | brown |
| CHCHD8     | brown |
| CHD8       | brown |
| CHEK1      | brown |
| CHGA       | brown |
| CHI3L2     | brown |
| CHKA       | brown |
| CHMP4B     | brown |
| CHP        | brown |
| CHRN1      | brown |
| CHRN2      | brown |
| CHST11     | brown |
| CHST15     | brown |
| CHST7      | brown |
| CITED2     | brown |
| CKAP4      | brown |
| CLC        | brown |
| CLCN5      | brown |
| CLDN16     | brown |
| CLDN9      | brown |
| CLEC4C     | brown |
| CLIP2      | brown |
| CLPX       | brown |
| CLTA       | brown |
| CLTC       | brown |
| CLTCL1     | brown |
| CMIP       | brown |
| CMTM1      | brown |
| CNFN       | brown |
| CNN2       | brown |
| CNNM4      | brown |
| CNOT1      | brown |
| CNOT4      | brown |
| CNPY2      | brown |
| CNTD1      | brown |
| COA5       | brown |
| COG8       | brown |
| COL15A1    | brown |
| COL5A2     | brown |
| COL8A2     | brown |
| COLEC12    | brown |
| COPA       | brown |
| COPB2      | brown |
| COPG       | brown |
| COPS7A     | brown |
| COPS8      | brown |
| COPZ2      | brown |
| COQ3       | brown |
| COQ5       | brown |

|          |       |
|----------|-------|
| CORO1C   | brown |
| COTL1    | brown |
| COX11    | brown |
| COX17    | brown |
| COX18    | brown |
| COX5A    | brown |
| COX6A1   | brown |
| CPM      | brown |
| CPNE2    | brown |
| CPNE7    | brown |
| CPOX     | brown |
| CPPED1   | brown |
| CPSF7    | brown |
| CPT1A    | brown |
| CPT2     | brown |
| CPVL     | brown |
| CREBBP   | brown |
| CRISPLD2 | brown |
| CRKL     | brown |
| CRNKL1   | brown |
| CRTAM    | brown |
| CRYGS    | brown |
| CRYZ     | brown |
| CS       | brown |
| CSAD     | brown |
| CSF1     | brown |
| CSF1R    | brown |
| CSF2RA   | brown |
| CSF2RB   | brown |
| CSF3R    | brown |
| CSNK1D   | brown |
| CSNK2A1  | brown |
| CTDP1    | brown |
| CTDSP2   | brown |
| CTIF     | brown |
| CTNNA1   | brown |
| CTNNAL1  | brown |
| CTNNB1   | brown |
| CTNND1   | brown |
| CTSA     | brown |
| CTSB     | brown |
| CTSD     | brown |
| CTSZ     | brown |
| CUX1     | brown |
| CUX2     | brown |
| CWC15    | brown |
| CXCR2    | brown |
| CXCR7    | brown |
| CXorf56  | brown |
| CYB5A    | brown |
| CYB5D1   | brown |
| CYB5R1   | brown |
| CYB5R3   | brown |
| CYFIP1   | brown |
| CYP27A1  | brown |
| CYP2R1   | brown |
| CYP4F3   | brown |
| DAB2     | brown |
| DAG1     | brown |
| DAP      | brown |
| DAP3     | brown |
| DAPK1    | brown |
| DAPK2    | brown |
| DAZAP2   | brown |
| DBNL     | brown |
| DCLRE1B  | brown |
| DCUN1D2  | brown |
| DDTL     | brown |



|                        |       |
|------------------------|-------|
| DEDD                   | brown |
| DENND1A                | brown |
| DENND3                 | brown |
| DENND5A                | brown |
| DGCR11                 | brown |
| DGCR2                  | brown |
| DGKG                   | brown |
| DHTKD1                 | brown |
| DHX34                  | brown |
| DHX8                   | brown |
| DIRC3                  | brown |
| DISC1                  | brown |
| DKFZP686I15217         | brown |
| DKFZp761E198           | brown |
| DLEU1                  | brown |
| DMKN                   | brown |
| DNAAF2                 | brown |
| DNAH17                 | brown |
| DNAJB12                | brown |
| DNAJB5                 | brown |
| DNAJB6                 | brown |
| DNAJC13                | brown |
| DNAJC14                | brown |
| DNAJC18                | brown |
| DNAJC19                | brown |
| DNAJC5                 | brown |
| DNAJC5B                | brown |
| DNM2                   | brown |
| DNMBP                  | brown |
| DNMT3B                 | brown |
| DOCK2                  | brown |
| DOCK5                  | brown |
| DOCK6                  | brown |
| DOCK8                  | brown |
| DOK3                   | brown |
| DPAGT1                 | brown |
| DPF2                   | brown |
| DPH5                   | brown |
| DPRXP4                 | brown |
| DSCC1                  | brown |
| DSCR3                  | brown |
| DTX2P1-UPK3BP1-PMS2P11 | brown |
| DUS4L                  | brown |
| DUSP12                 | brown |
| DUSP18                 | brown |
| DUT                    | brown |
| DVL3                   | brown |
| DYNLL1                 | brown |
| DYNLL2                 | brown |
| DYRK4                  | brown |
| DYSF                   | brown |
| ECE1                   | brown |
| EEPD1                  | brown |
| EFHA2                  | brown |
| EFHC1                  | brown |
| EGR1                   | brown |
| EHBP1L1                | brown |
| EHD1                   | brown |
| EHD3                   | brown |
| EID2B                  | brown |
| EID3                   | brown |
| EIF2AK1                | brown |
| EIF2B3                 | brown |
| EIF2C1                 | brown |
| EIF2C2                 | brown |
| EIF2D                  | brown |
| EIF4A2                 | brown |
| EIF4EBP2               | brown |

|            |       |
|------------|-------|
| EIF4H      | brown |
| ELAC1      | brown |
| ELF4       | brown |
| ELK1       | brown |
| ELL        | brown |
| ELL3       | brown |
| ELMO1      | brown |
| ELMO2      | brown |
| ELOVL1     | brown |
| ELOVL3     | brown |
| EMG1       | brown |
| EMILIN2    | brown |
| EMR2       | brown |
| ENDOU      | brown |
| ENO1       | brown |
| ENOPH1     | brown |
| ENSA       | brown |
| ENTPD3-AS1 | brown |
| EP300      | brown |
| EPB41      | brown |
| EPB41L3    | brown |
| EPHB1      | brown |
| EPHB2      | brown |
| EPS15L1    | brown |
| ERC1       | brown |
| ERF        | brown |
| ERGIC1     | brown |
| ERICH1     | brown |
| ERMAP      | brown |
| ERMN       | brown |
| ESD        | brown |
| ESR1       | brown |
| ESRP2      | brown |
| ETV6       | brown |
| EVC        | brown |
| EXOSC1     | brown |
| EXOSC3     | brown |
| EXOSC8     | brown |
| EXTL3      | brown |
| EYA3       | brown |
| F11R       | brown |
| F13A1      | brown |
| F2RL2      | brown |
| FABP6      | brown |
| FAHD1      | brown |
| FAHD2A     | brown |
| FAIM       | brown |
| FAM101B    | brown |
| FAM104B    | brown |
| FAM110C    | brown |
| FAM120B    | brown |
| FAM129A    | brown |
| FAM129B    | brown |
| FAM136A    | brown |
| FAM157A    | brown |
| FAM160A2   | brown |
| FAM162A    | brown |
| FAM165B    | brown |
| FAM168A    | brown |
| FAM192A    | brown |
| FAM193A    | brown |
| FAM19A1    | brown |
| FAM202A    | brown |
| FAM20A     | brown |
| FAM21A     | brown |
| FAM21C     | brown |
| FAM24B     | brown |
| FAM35B2    | brown |

|          |       |
|----------|-------|
| FAM36A   | brown |
| FAM53C   | brown |
| FAM58A   | brown |
| FAM63A   | brown |
| FAM66C   | brown |
| FAM71F2  | brown |
| FAM76A   | brown |
| FAM96B   | brown |
| FAM98C   | brown |
| FANCF    | brown |
| FANK1    | brown |
| FBN2     | brown |
| FBP1     | brown |
| FBR5     | brown |
| FBXL20   | brown |
| FBXO22   | brown |
| FBXO25   | brown |
| FBXO40   | brown |
| FCAR     | brown |
| FCN1     | brown |
| FDPSL2A  | brown |
| FDX1     | brown |
| FGF9     | brown |
| FHDC1    | brown |
| FIG4     | brown |
| FIS1     | brown |
| FKBP15   | brown |
| FKBP1A   | brown |
| FKBP5    | brown |
| FKBP9    | brown |
| FLCN     | brown |
| FLJ10038 | brown |
| FLJ14107 | brown |
| FLJ14186 | brown |
| FLJ23867 | brown |
| FLJ31813 | brown |
| FLJ37453 | brown |
| FLJ39582 | brown |
| FLJ40292 | brown |
| FLJ44635 | brown |
| FLJ45340 | brown |
| FLJ45445 | brown |
| FLOT2    | brown |
| FLT3     | brown |
| FLVCR2   | brown |
| FNTB     | brown |
| FOSL2    | brown |
| FOXJ2    | brown |
| FOXN3    | brown |
| FOXO4    | brown |
| FOXP3    | brown |
| FRS3     | brown |
| FSCN1    | brown |
| FTH1P3   | brown |
| FTO      | brown |
| FUCA2    | brown |
| FUNDC1   | brown |
| FURIN    | brown |
| FUS      | brown |
| FXVD6    | brown |
| FZD1     | brown |
| G6PD     | brown |
| GAB2     | brown |
| GAB3     | brown |
| GABRR2   | brown |
| GALNS    | brown |
| GALNT11  | brown |
| GALNT2   | brown |

|          |       |
|----------|-------|
| GAPDHS   | brown |
| GAS7     | brown |
| GATAD2B  | brown |
| GATS     | brown |
| GBA      | brown |
| GCC1     | brown |
| GCK      | brown |
| GCNT7    | brown |
| GDF15    | brown |
| GDI2     | brown |
| GDPD1    | brown |
| GFOD2    | brown |
| GHITM    | brown |
| GHRLOS2  | brown |
| GIGYF2   | brown |
| GIMAP4   | brown |
| GIMAP8   | brown |
| GIT2     | brown |
| GK3P     | brown |
| GLB1     | brown |
| GLB1L    | brown |
| GLI1     | brown |
| GLMN     | brown |
| GLO1     | brown |
| GLUL     | brown |
| GLYR1    | brown |
| GM2A     | brown |
| GMDS     | brown |
| GMEB1    | brown |
| GMIP     | brown |
| GNA11    | brown |
| GNA12    | brown |
| GNA15    | brown |
| GNAI2    | brown |
| GNAL     | brown |
| GNAS     | brown |
| GNAT2    | brown |
| GNB1     | brown |
| GNB5     | brown |
| GNRH1    | brown |
| GNS      | brown |
| GOLGA2   | brown |
| GOLGA5   | brown |
| GOLGA6L5 | brown |
| GOLGA6L9 | brown |
| GOLGB1   | brown |
| GOLIM4   | brown |
| GOLM1    | brown |
| GOSR1    | brown |
| GPR107   | brown |
| GPR18    | brown |
| GPR183   | brown |
| GPR64    | brown |
| GPRIN1   | brown |
| GPX7     | brown |
| GRAMD1B  | brown |
| GRB10    | brown |
| GRB2     | brown |
| GRIN2D   | brown |
| GRINA    | brown |
| GRN      | brown |
| GSK3A    | brown |
| GSN      | brown |
| GSR      | brown |
| GSTA4    | brown |
| GTF2F1   | brown |
| GTF2H5   | brown |
| GTF2I    | brown |

|          |       |
|----------|-------|
| GTF2IP1  | brown |
| GTF3A    | brown |
| GTPBP1   | brown |
| GTPBP5   | brown |
| GUSBP1   | brown |
| GUSBP4   | brown |
| GUSBP5   | brown |
| H1FO     | brown |
| H2AFY    | brown |
| HAAO     | brown |
| HAR1A    | brown |
| HAR1B    | brown |
| HAX1     | brown |
| HCG4     | brown |
| HCK      | brown |
| HCLS1    | brown |
| HDAC4    | brown |
| HDDC2    | brown |
| HDDC3    | brown |
| HDGF     | brown |
| HDLBP    | brown |
| HENMT1   | brown |
| HERPUD1  | brown |
| HESX1    | brown |
| HEXB     | brown |
| HFE      | brown |
| HGD      | brown |
| HGSNAT   | brown |
| HIBADH   | brown |
| HIP1     | brown |
| HIPK2    | brown |
| HIST3H2A | brown |
| HIVEP3   | brown |
| HK1      | brown |
| HK2      | brown |
| HLA-B    | brown |
| HLA-C    | brown |
| HLA-DPA1 | brown |
| HLA-E    | brown |
| HM13     | brown |
| HMGN3    | brown |
| HMGN4    | brown |
| HMOX1    | brown |
| HNRNPD   | brown |
| HNRNPF   | brown |
| HNRNPK   | brown |
| HNRNPUL1 | brown |
| HNRNPUL2 | brown |
| HRH2     | brown |
| HRK      | brown |
| HSBP1L1  | brown |
| HSCB     | brown |
| HSD17B14 | brown |
| HSD17B3  | brown |
| HSD17B4  | brown |
| HSD17B6  | brown |
| HSPA1A   | brown |
| HSPA1B   | brown |
| HSPA5    | brown |
| HYLS1    | brown |
| ICOS     | brown |
| IFI27L1  | brown |
| IFI27L2  | brown |
| IFNAR2   | brown |
| IFT43    | brown |
| IFT46    | brown |
| IGF1R    | brown |
| IGF2R    | brown |

|           |       |
|-----------|-------|
| IKZF1     | brown |
| IL17RA    | brown |
| IL23A     | brown |
| IL4R      | brown |
| IL6R      | brown |
| IMMP2L    | brown |
| IMPDH1    | brown |
| ING4      | brown |
| INSR      | brown |
| INTS3     | brown |
| IP6K1     | brown |
| IQCB1     | brown |
| IQCE      | brown |
| IQSEC1    | brown |
| IRAK2     | brown |
| IRF2      | brown |
| IRF2BP1   | brown |
| IRS2      | brown |
| ISCU      | brown |
| ISG20L2   | brown |
| ITGA5     | brown |
| ITGAE     | brown |
| ITGAM     | brown |
| ITGAX     | brown |
| ITGB2     | brown |
| ITGB4     | brown |
| ITM2A     | brown |
| ITPK1     | brown |
| ITPK1-AS1 | brown |
| ITSN1     | brown |
| JAK1      | brown |
| JAK3      | brown |
| JARID2    | brown |
| JPH4      | brown |
| KAT5      | brown |
| KAT6A     | brown |
| KAT7      | brown |
| KATNA1    | brown |
| KBTBD11   | brown |
| KCNA5     | brown |
| KCNC3     | brown |
| KCND1     | brown |
| KCNG2     | brown |
| KCNK13    | brown |
| KCNK6     | brown |
| KCNMB3    | brown |
| KCNMB4    | brown |
| KCNQ1OT1  | brown |
| KCNRG     | brown |
| KCTD21    | brown |
| KDEL1     | brown |
| KDM2A     | brown |
| KDM3B     | brown |
| KDM4B     | brown |
| KDM5B     | brown |
| KDM6B     | brown |
| KGFLP2    | brown |
| KHDRBS2   | brown |
| KIAA0040  | brown |
| KIAA0196  | brown |
| KIAA0226L | brown |
| KIAA0247  | brown |
| KIAA0317  | brown |
| KIAA0319L | brown |
| KIAA0430  | brown |
| KIAA0513  | brown |
| KIAA0556  | brown |
| KIAA0913  | brown |

|              |       |
|--------------|-------|
| KIAA0922     | brown |
| KIAA1267     | brown |
| KIAA1324     | brown |
| KIAA1598     | brown |
| KIAA1614     | brown |
| KIAA1949     | brown |
| KIAA1958     | brown |
| KIF13A       | brown |
| KIF1B        | brown |
| KIF1C        | brown |
| KIF3C        | brown |
| KIR3DL1      | brown |
| KLF13        | brown |
| KLF4         | brown |
| KLF7         | brown |
| KLF9         | brown |
| KLHDC2       | brown |
| KLHL18       | brown |
| KLHL21       | brown |
| KLHL32       | brown |
| KLRC4-KLRK1  | brown |
| KPNB1        | brown |
| KREMEN1      | brown |
| KRT2         | brown |
| KSR1         | brown |
| KT112        | brown |
| LAIR2        | brown |
| LAMP1        | brown |
| LAPTM5       | brown |
| LASP1        | brown |
| LAT2         | brown |
| LCMT2        | brown |
| LCP1         | brown |
| LCP2         | brown |
| LDLRAD3      | brown |
| LEFTY2       | brown |
| LEKR1        | brown |
| LILRA1       | brown |
| LILRA4       | brown |
| LILRB1       | brown |
| LILRB2       | brown |
| LIMK1        | brown |
| LIMK2        | brown |
| LIN7B        | brown |
| LIPA         | brown |
| LIPT1        | brown |
| LMTK2        | brown |
| LNP1         | brown |
| LOC100128682 | brown |
| LOC100128881 | brown |
| LOC100129034 | brown |
| LOC100129196 | brown |
| LOC100129518 | brown |
| LOC100129931 | brown |
| LOC100129961 | brown |
| LOC100130093 | brown |
| LOC100130298 | brown |
| LOC100131733 | brown |
| LOC100132247 | brown |
| LOC100133161 | brown |
| LOC100270804 | brown |
| LOC100272217 | brown |
| LOC100287015 | brown |
| LOC100287482 | brown |
| LOC100288069 | brown |
| LOC100289473 | brown |
| LOC100289495 | brown |
| LOC100294362 | brown |

|              |       |
|--------------|-------|
| LOC100303728 | brown |
| LOC100303749 | brown |
| LOC100306951 | brown |
| LOC100499177 | brown |
| LOC100499194 | brown |
| LOC100505483 | brown |
| LOC100505549 | brown |
| LOC100505622 | brown |
| LOC100505687 | brown |
| LOC100505738 | brown |
| LOC100505761 | brown |
| LOC100505881 | brown |
| LOC100506054 | brown |
| LOC100506068 | brown |
| LOC100506207 | brown |
| LOC100506233 | brown |
| LOC100506428 | brown |
| LOC100506585 | brown |
| LOC100506686 | brown |
| LOC100506844 | brown |
| LOC100506963 | brown |
| LOC100507032 | brown |
| LOC100507250 | brown |
| LOC100507423 | brown |
| LOC100507547 | brown |
| LOC100630918 | brown |
| LOC139201    | brown |
| LOC144486    | brown |
| LOC145474    | brown |
| LOC145783    | brown |
| LOC147727    | brown |
| LOC148189    | brown |
| LOC148696    | brown |
| LOC150197    | brown |
| LOC152217    | brown |
| LOC152225    | brown |
| LOC202781    | brown |
| LOC254128    | brown |
| LOC255512    | brown |
| LOC256880    | brown |
| LOC257358    | brown |
| LOC257396    | brown |
| LOC283070    | brown |
| LOC283104    | brown |
| LOC283481    | brown |
| LOC284385    | brown |
| LOC284408    | brown |
| LOC286442    | brown |
| LOC339290    | brown |
| LOC374443    | brown |
| LOC387723    | brown |
| LOC388152    | brown |
| LOC388789    | brown |
| LOC389765    | brown |
| LOC399744    | brown |
| LOC399815    | brown |
| LOC400027    | brown |
| LOC400604    | brown |
| LOC400657    | brown |
| LOC400752    | brown |
| LOC400960    | brown |
| LOC440288    | brown |
| LOC440434    | brown |
| LOC440944    | brown |
| LOC550112    | brown |
| LOC554206    | brown |
| LOC613037    | brown |
| LOC643733    | brown |



|           |       |
|-----------|-------|
| LOC643770 | brown |
| LOC644656 | brown |
| LOC644714 | brown |
| LOC645212 | brown |
| LOC645431 | brown |
| LOC645638 | brown |
| LOC645676 | brown |
| LOC646762 | brown |
| LOC678655 | brown |
| LOC727896 | brown |
| LOC728175 | brown |
| LOC728558 | brown |
| LOC728730 | brown |
| LOC729234 | brown |
| LOC729603 | brown |
| LOC729737 | brown |
| LOC731275 | brown |
| LOC79015  | brown |
| LOC93622  | brown |
| LOXHD1    | brown |
| LOXL3     | brown |
| LPCAT3    | brown |
| LPIN2     | brown |
| LPPR2     | brown |
| LRFN1     | brown |
| LRIT3     | brown |
| LRP1      | brown |
| LRP10     | brown |
| LRRC23    | brown |
| LRRC25    | brown |
| LRRC3     | brown |
| LRRC37A   | brown |
| LRRC37A3  | brown |
| LRRC39    | brown |
| LRRC59    | brown |
| LRRFIP2   | brown |
| LRRK1     | brown |
| LSM5      | brown |
| LSM7      | brown |
| LSP1      | brown |
| LTA4H     | brown |
| LTB4R     | brown |
| LTBP2     | brown |
| LYG1      | brown |
| LYRM4     | brown |
| LYSMD1    | brown |
| LZTS1     | brown |
| MAEA      | brown |
| MAFB      | brown |
| MAFG      | brown |
| MAGEH1    | brown |
| MAGI2     | brown |
| MAGOHB    | brown |
| MAML1     | brown |
| MAML3     | brown |
| MAN2A2    | brown |
| MAN2B2    | brown |
| MANBA     | brown |
| MANF      | brown |
| MAP1S     | brown |
| MAP2K1    | brown |
| MAP2K3    | brown |
| MAP3K3    | brown |
| MAP3K5    | brown |
| MAP4K4    | brown |
| MAP7D1    | brown |
| MAPK13    | brown |
| MAPK14    | brown |

|           |       |
|-----------|-------|
| MAPKAPK5  | brown |
| MAPRE1    | brown |
| MAPRE3    | brown |
| MARK2     | brown |
| MARK3     | brown |
| MARVELD1  | brown |
| MAST3     | brown |
| MATL2963  | brown |
| MAU2      | brown |
| MAX       | brown |
| MBD6      | brown |
| MBOAT7    | brown |
| MBP       | brown |
| MCF2L-AS1 | brown |
| MDP1      | brown |
| ME3       | brown |
| MED12     | brown |
| MED25     | brown |
| MEFV      | brown |
| MERTK     | brown |
| MEST      | brown |
| METTL10   | brown |
| METTL23   | brown |
| METTL5    | brown |
| METTL6    | brown |
| MFN2      | brown |
| MFSD11    | brown |
| MFSD2A    | brown |
| MFSD6L    | brown |
| MGAM      | brown |
| MGRN1     | brown |
| MGST3     | brown |
| MICAL2    | brown |
| MICALCL   | brown |
| MICU1     | brown |
| MIDN      | brown |
| MIR17HG   | brown |
| MIR210HG  | brown |
| MIR3648   | brown |
| MIS12     | brown |
| MIS18A    | brown |
| MKNK1     | brown |
| MKNK2     | brown |
| MLF1      | brown |
| MLF2      | brown |
| MLH3      | brown |
| MLL2      | brown |
| MLLT1     | brown |
| MMP14     | brown |
| MMP25     | brown |
| MMP9      | brown |
| MOBKLA    | brown |
| MON1B     | brown |
| MOSC1     | brown |
| MPEG1     | brown |
| MPP1      | brown |
| MREG      | brown |
| MRFAP1L1  | brown |
| MRP63     | brown |
| MRPL11    | brown |
| MRPL14    | brown |
| MRPL17    | brown |
| MRPL21    | brown |
| MRPL27    | brown |
| MRPL30    | brown |
| MRPL34    | brown |
| MRPL35    | brown |
| MRPL36    | brown |

|            |       |
|------------|-------|
| MRPL43     | brown |
| MRPL45     | brown |
| MRPL45P2   | brown |
| MRPL46     | brown |
| MRPL51     | brown |
| MRPL53     | brown |
| MRPS14     | brown |
| MRPS21     | brown |
| MRPS23     | brown |
| MRPS30     | brown |
| MRPS35     | brown |
| MRPS6      | brown |
| MRS2P2     | brown |
| MRT04      | brown |
| MS4A14     | brown |
| MSL3P1     | brown |
| MSMP       | brown |
| MSN        | brown |
| MSRA       | brown |
| MST1P9     | brown |
| MSX2P1     | brown |
| MT1E       | brown |
| MTCP1      | brown |
| MTCP1NB    | brown |
| MTERFD3    | brown |
| MTF1       | brown |
| MTMR12     | brown |
| MTMR14     | brown |
| MTMR3      | brown |
| MTVR2      | brown |
| MX2        | brown |
| MYADM      | brown |
| MYB        | brown |
| MYCL1      | brown |
| MYD88      | brown |
| MYH11      | brown |
| MYH9       | brown |
| MYL6       | brown |
| MYL6B      | brown |
| MYLK-AS1   | brown |
| MYO1F      | brown |
| MYO7A      | brown |
| MYOF       | brown |
| N4BP1      | brown |
| NGAMT1     | brown |
| NGAMT2     | brown |
| NAAA       | brown |
| NACC2      | brown |
| NADK       | brown |
| NAE1       | brown |
| NAF1       | brown |
| NAGA       | brown |
| NAGK       | brown |
| NANOS1     | brown |
| NAP1L3     | brown |
| NAP1L5     | brown |
| NAPA       | brown |
| NBEAL2     | brown |
| NBR1       | brown |
| NCF2       | brown |
| NCOA6      | brown |
| NCOR1      | brown |
| NCRNA00086 | brown |
| NCRNA00115 | brown |
| NCRNA00116 | brown |
| NCRNA00219 | brown |
| NCRNA00282 | brown |
| NCRNA00321 | brown |

|            |       |
|------------|-------|
| NCRNA00339 | brown |
| NCSTN      | brown |
| NDEL1      | brown |
| NDNL2      | brown |
| NDRG1      | brown |
| NDRG3      | brown |
| NDST1      | brown |
| NDST2      | brown |
| NDUFA12    | brown |
| NDUFA7     | brown |
| NDUFAB1    | brown |
| NDUFAF4    | brown |
| NDUFB2     | brown |
| NDUFC1     | brown |
| NDUFS3     | brown |
| NDUFV2     | brown |
| NEK3       | brown |
| NEK6       | brown |
| NEU1       | brown |
| NFAM1      | brown |
| NFIC       | brown |
| NFKB1      | brown |
| NFKBIA     | brown |
| NFYC       | brown |
| NGDN       | brown |
| NGRN       | brown |
| NHEJ1      | brown |
| NHLH1      | brown |
| NHSL1      | brown |
| NHSL2      | brown |
| NID1       | brown |
| NIT2       | brown |
| NKAPP1     | brown |
| NKIRAS2    | brown |
| NLRC4      | brown |
| NLRP12     | brown |
| NLRP3      | brown |
| NLRP6      | brown |
| NLRX1      | brown |
| NMB        | brown |
| NME1       | brown |
| NME2       | brown |
| NMNAT1     | brown |
| NOD2       | brown |
| NOL7       | brown |
| NOMO2      | brown |
| NOMO3      | brown |
| NOTCH1     | brown |
| NOTCH2     | brown |
| NPM3       | brown |
| NR2C1      | brown |
| NRBP1      | brown |
| NSD1       | brown |
| NSFL1C     | brown |
| NSMCE4A    | brown |
| NT5C3L     | brown |
| NTAN1      | brown |
| NTNG2      | brown |
| NTPCR      | brown |
| NUAK2      | brown |
| NUB1       | brown |
| NUCB1      | brown |
| NUDT15     | brown |
| NUDT2      | brown |
| NUDT7      | brown |
| NUMB       | brown |
| NUP35      | brown |
| NUP98      | brown |

|          |       |
|----------|-------|
| NUPL2    | brown |
| NXT1     | brown |
| OAZ2     | brown |
| OCIAD2   | brown |
| OLFML2B  | brown |
| OPTN     | brown |
| ORAI2    | brown |
| ORMDL1   | brown |
| OS9      | brown |
| OSBP     | brown |
| OSBPL2   | brown |
| OSMR     | brown |
| OST4     | brown |
| OSTalpha | brown |
| OSTF1    | brown |
| OXNAD1   | brown |
| P2RX1    | brown |
| PACS1    | brown |
| PACSIN2  | brown |
| PADI2    | brown |
| PADI4    | brown |
| PAF1     | brown |
| PAFAH1B1 | brown |
| PAK1     | brown |
| PAPLN    | brown |
| PAQR6    | brown |
| PARP4    | brown |
| PBX2     | brown |
| PCBP1    | brown |
| PCBP2    | brown |
| PCDHGC3  | brown |
| PCP4L1   | brown |
| PCYT1A   | brown |
| PDCD5    | brown |
| PDCD6    | brown |
| PDE7B    | brown |
| PDZD11   | brown |
| PECAM1   | brown |
| PET117   | brown |
| PEX7     | brown |
| PFDN1    | brown |
| PFDN2    | brown |
| PFDN6    | brown |
| PFKFB3   | brown |
| PGAM1    | brown |
| PGBD1    | brown |
| PGBD2    | brown |
| PGCP     | brown |
| PGD      | brown |
| PGK1     | brown |
| PGM1     | brown |
| PHB2     | brown |
| PHF12    | brown |
| PHF2     | brown |
| PHF21A   | brown |
| PHF23    | brown |
| PHF8     | brown |
| PHKA2    | brown |
| PHLPP1   | brown |
| PHOSPHO2 | brown |
| PHYH     | brown |
| PIAS3    | brown |
| PID1     | brown |
| PIGC     | brown |
| PIGH     | brown |
| PIK3CD   | brown |
| PIK3R5   | brown |
| PILRA    | brown |

|           |       |
|-----------|-------|
| PIM1      | brown |
| PIM2      | brown |
| PINK1     | brown |
| PIP4K2C   | brown |
| PITPNA    | brown |
| PKNOX1    | brown |
| PLA2G12A  | brown |
| PLA2G16   | brown |
| PLAC8     | brown |
| PLAGL2    | brown |
| PLAUR     | brown |
| PLBD2     | brown |
| PLCG2     | brown |
| PLCL2     | brown |
| PLEK      | brown |
| PLEKHB2   | brown |
| PLEKHG6   | brown |
| PLEKHM1P  | brown |
| PLEKHO2   | brown |
| PLIN1     | brown |
| PLIN3     | brown |
| PLIN4     | brown |
| PLOD1     | brown |
| PLXNA2    | brown |
| PMPCB     | brown |
| PNMA1     | brown |
| POC5      | brown |
| POLE4     | brown |
| POLR2A    | brown |
| POLR3F    | brown |
| POLR3GL   | brown |
| POMC      | brown |
| POP5      | brown |
| POU2F2    | brown |
| POU5F1    | brown |
| POU5F1B   | brown |
| POU5F1P3  | brown |
| PP7080    | brown |
| PPA2      | brown |
| PPAPDC2   | brown |
| PPFIA1    | brown |
| PPIAL4G   | brown |
| PPID      | brown |
| PPIL1     | brown |
| PPL       | brown |
| PPM1F     | brown |
| PPM1H     | brown |
| PPP1R10   | brown |
| PPP1R11   | brown |
| PPP1R12B  | brown |
| PPP2R2D   | brown |
| PPT1      | brown |
| PRAF2     | brown |
| PRAM1     | brown |
| PRCP      | brown |
| PRDX4     | brown |
| PREX1     | brown |
| PRG2      | brown |
| PRH1-PRR4 | brown |
| PRIC285   | brown |
| PRIM1     | brown |
| PRKAB1    | brown |
| PRKACA    | brown |
| PRKCB     | brown |
| PRKCD     | brown |
| PRKD2     | brown |
| PRKDC     | brown |
| PRKRA     | brown |

|           |       |
|-----------|-------|
| PRMT5     | brown |
| PRMT6     | brown |
| PRORS1P   | brown |
| PROSC     | brown |
| PRPH2     | brown |
| PRR14L    | brown |
| PRRC2A    | brown |
| PRSS27    | brown |
| PRSS57    | brown |
| PSAP      | brown |
| PSEN1     | brown |
| PSMB2     | brown |
| PSMD3     | brown |
| PSME3     | brown |
| PSMF1     | brown |
| PSTK      | brown |
| PTAFR     | brown |
| PTGER2    | brown |
| PTK2B     | brown |
| PTPLA     | brown |
| PTPMT1    | brown |
| PTPN1     | brown |
| PTPN6     | brown |
| PTPN9     | brown |
| PTPRJ     | brown |
| PTRF      | brown |
| PTRHD1    | brown |
| PTTG1     | brown |
| PTTG1IP   | brown |
| PTX3      | brown |
| PTX4      | brown |
| PVR       | brown |
| PVRL1     | brown |
| PXMP2     | brown |
| PXN       | brown |
| PYGL      | brown |
| QSOX1     | brown |
| R3HDM2    | brown |
| RAB11FIP1 | brown |
| RAB11FIP4 | brown |
| RAB19     | brown |
| RAB23     | brown |
| RAB35     | brown |
| RAB36     | brown |
| RAB3D     | brown |
| RAB40B    | brown |
| RAB42     | brown |
| RAB43     | brown |
| RAB5B     | brown |
| RAB5C     | brown |
| RAB7A     | brown |
| RAB8A     | brown |
| RABGGTB   | brown |
| RABL5     | brown |
| RAC1      | brown |
| RAC2      | brown |
| RAD1      | brown |
| RAD23B    | brown |
| RAD54B    | brown |
| RAF1      | brown |
| RAGE      | brown |
| RALB      | brown |
| RALBP1    | brown |
| RALGAPA2  | brown |
| RAMP1     | brown |
| RAP1GAP2  | brown |
| RAPGEFL1  | brown |
| RARS      | brown |

|          |       |
|----------|-------|
| RASSF2   | brown |
| RASSF5   | brown |
| RASSF8   | brown |
| RBM20    | brown |
| RBM22    | brown |
| RBM23    | brown |
| RBM8A    | brown |
| RBMS2    | brown |
| RBMX2    | brown |
| RBP5     | brown |
| RBPJ     | brown |
| RCC1     | brown |
| RCOR1    | brown |
| RCSD1    | brown |
| REER     | brown |
| REXO2    | brown |
| RFC4     | brown |
| RFESD    | brown |
| RFFL     | brown |
| RFX1     | brown |
| RFX2     | brown |
| RGAG4    | brown |
| RGL3     | brown |
| RGL4     | brown |
| RGP1     | brown |
| RGS10    | brown |
| RGS16    | brown |
| RGS3     | brown |
| RHBDF2   | brown |
| RHEBL1   | brown |
| RHOA     | brown |
| RILPL1   | brown |
| RIN2     | brown |
| RIN3     | brown |
| RIPK1    | brown |
| RNASEH2B | brown |
| RNASET2  | brown |
| RNF114   | brown |
| RNF122   | brown |
| RNF14    | brown |
| RNF167   | brown |
| RNF170   | brown |
| RNF185   | brown |
| RNF213   | brown |
| RNF24    | brown |
| RNF34    | brown |
| RNF39    | brown |
| RNF41    | brown |
| RNPEP    | brown |
| ROMO1    | brown |
| RP9      | brown |
| RP9P     | brown |
| RPA3     | brown |
| RPAIN    | brown |
| RPH3A    | brown |
| RPL6     | brown |
| RPLP0    | brown |
| RPLP0P2  | brown |
| RPN1     | brown |
| RPP30    | brown |
| RPP40    | brown |
| RPRD2    | brown |
| RPS10    | brown |
| RPS2P32  | brown |
| RPS6KA1  | brown |
| RPS9     | brown |
| RPSAP9   | brown |
| RPUSD4   | brown |



|          |       |
|----------|-------|
| RRAGB    | brown |
| RRAGC    | brown |
| RRAS2    | brown |
| RRBP1    | brown |
| RRP12    | brown |
| RRP15    | brown |
| RSPH3    | brown |
| RSU1     | brown |
| RTCD1    | brown |
| RTF1     | brown |
| RTN1     | brown |
| RTN4     | brown |
| RUFY1    | brown |
| RUNDC1   | brown |
| RUNDC2A  | brown |
| RUSC2    | brown |
| RXRA     | brown |
| SAAL1    | brown |
| SAMD4B   | brown |
| SAMHD1   | brown |
| SAP130   | brown |
| SASH1    | brown |
| SBDS     | brown |
| SBDSP1   | brown |
| SC4MOL   | brown |
| SCAMP2   | brown |
| SCAND3   | brown |
| SCLY     | brown |
| SCPEP1   | brown |
| SCRT2    | brown |
| SDHC     | brown |
| SEC14L1  | brown |
| SEC16A   | brown |
| SEC22A   | brown |
| SEC23B   | brown |
| SEC31A   | brown |
| SEC61G   | brown |
| SELL     | brown |
| SELPLG   | brown |
| SELS     | brown |
| SEMA4A   | brown |
| SEMA4B   | brown |
| SEMA4D   | brown |
| SEPHS1   | brown |
| SERF2    | brown |
| SERPINA1 | brown |
| SERPINB8 | brown |
| SESN2    | brown |
| SETD1B   | brown |
| SETDB1   | brown |
| SETMAR   | brown |
| SF3B4    | brown |
| SFT2D3   | brown |
| SFTPB    | brown |
| SGCE     | brown |
| SGPL1    | brown |
| SH2B3    | brown |
| SH2D1A   | brown |
| SH2D3C   | brown |
| SH3BGR   | brown |
| SH3BP5L  | brown |
| SH3KBP1  | brown |
| SH3PXD2B | brown |
| SH3RF3   | brown |
| SH3YL1   | brown |
| SHISA2   | brown |
| SHKBP1   | brown |
| SIAE     | brown |

|          |       |
|----------|-------|
| SIGLEC10 | brown |
| SIGLEC5  | brown |
| SIGLEC7  | brown |
| SIGLEC9  | brown |
| SIK3     | brown |
| SIN3A    | brown |
| SIPA1L1  | brown |
| SIPA1L2  | brown |
| SIRPA    | brown |
| SIRPB1   | brown |
| SIRPB2   | brown |
| SIRT4    | brown |
| SKI      | brown |
| SLA      | brown |
| SLC11A1  | brown |
| SLC1A5   | brown |
| SLC24A4  | brown |
| SLC25A14 | brown |
| SLC25A26 | brown |
| SLC25A33 | brown |
| SLC25A44 | brown |
| SLC27A5  | brown |
| SLC2A3   | brown |
| SLC31A1  | brown |
| SLC35A2  | brown |
| SLC35E1  | brown |
| SLC35E3  | brown |
| SLC36A1  | brown |
| SLC37A2  | brown |
| SLC38A6  | brown |
| SLC38A7  | brown |
| SLC39A11 | brown |
| SLC43A2  | brown |
| SLC43A3  | brown |
| SLC44A2  | brown |
| SLC46A2  | brown |
| SLC48A1  | brown |
| SLC5A2   | brown |
| SLC6A12  | brown |
| SLC6A6   | brown |
| SLC7A5   | brown |
| SLC7A6OS | brown |
| SLC7A7   | brown |
| SLC9A1   | brown |
| SLC9A7P1 | brown |
| SLC9A8   | brown |
| SLCO3A1  | brown |
| SLED1    | brown |
| SLIRP    | brown |
| SMAD9    | brown |
| SMAP2    | brown |
| SMARCA2  | brown |
| SMARCD2  | brown |
| SMCR8    | brown |
| SMG7     | brown |
| SMG8     | brown |
| SMUG1    | brown |
| SMURF1   | brown |
| SNAP29   | brown |
| SNAPC5   | brown |
| SNHG1    | brown |
| SNHG10   | brown |
| SNHG12   | brown |
| SNHG3    | brown |
| SNHG5    | brown |
| SNHG7    | brown |
| SNHG8    | brown |
| SNIP1    | brown |

|          |       |
|----------|-------|
| SNN      | brown |
| SNORA10  | brown |
| SNORA52  | brown |
| SNORA67  | brown |
| SNORA70  | brown |
| SNORD17  | brown |
| SNORD22  | brown |
| SNRPA1   | brown |
| SNRPF    | brown |
| SNURF    | brown |
| SNX1     | brown |
| SNX12    | brown |
| SNX19    | brown |
| SNX24    | brown |
| SNX27    | brown |
| SNX30    | brown |
| SNX33    | brown |
| SOCS2    | brown |
| SOD1     | brown |
| SORL1    | brown |
| SOX4     | brown |
| SP140    | brown |
| SP2      | brown |
| SPATA2   | brown |
| SPATA24  | brown |
| SPATA7   | brown |
| SPCS1    | brown |
| SPDYA    | brown |
| SPECC1   | brown |
| SPEN     | brown |
| SPG21    | brown |
| SPINK2   | brown |
| SPINT1   | brown |
| SPOP     | brown |
| SPPL3    | brown |
| SPRED1   | brown |
| SPRY2    | brown |
| SPRYD4   | brown |
| SPRYD7   | brown |
| SPTB     | brown |
| SPTLC2   | brown |
| SQSTM1   | brown |
| SRC      | brown |
| SRF      | brown |
| SRGAP2   | brown |
| SRI      | brown |
| SRP54    | brown |
| SRPR     | brown |
| SRSF2    | brown |
| SRSF4    | brown |
| SRSF7    | brown |
| SRXN1    | brown |
| SSBP3    | brown |
| SSH1     | brown |
| SSH2     | brown |
| SSR2     | brown |
| ST14     | brown |
| ST3GAL2  | brown |
| STAG3L4  | brown |
| STAMBPL1 | brown |
| STARD8   | brown |
| STAT3    | brown |
| STAT5A   | brown |
| STAT5B   | brown |
| STAT6    | brown |
| STAU1    | brown |
| STEAP3   | brown |
| STK24    | brown |

|              |       |
|--------------|-------|
| STK32B       | brown |
| STK35        | brown |
| STK4         | brown |
| STK40        | brown |
| STRAP        | brown |
| STT3A        | brown |
| STX16-NPEPL1 | brown |
| STX18        | brown |
| SULF2        | brown |
| SUMF1        | brown |
| SUMO1P3      | brown |
| SUPT3H       | brown |
| SUSD1        | brown |
| SUZ12P       | brown |
| SV2B         | brown |
| SVIL         | brown |
| SYAP1        | brown |
| SYK          | brown |
| SYT2         | brown |
| TACC3        | brown |
| TADA2B       | brown |
| TAF11        | brown |
| TAF15        | brown |
| TAF4         | brown |
| TAGLN2       | brown |
| TALDO1       | brown |
| TANC2        | brown |
| TAP2         | brown |
| TAPBP        | brown |
| TASP1        | brown |
| TBC1D1       | brown |
| TBC1D14      | brown |
| TBC1D19      | brown |
| TBC1D2       | brown |
| TBC1D20      | brown |
| TBC1D2B      | brown |
| TBC1D5       | brown |
| TBC1D8       | brown |
| TBC1D9       | brown |
| TBCE         | brown |
| TBL1X        | brown |
| TBXAS1       | brown |
| TCEAL1       | brown |
| TCF20        | brown |
| TCN2         | brown |
| TCTN1        | brown |
| TECPR2       | brown |
| TEPP         | brown |
| TET3         | brown |
| TEX261       | brown |
| TFB2M        | brown |
| TFCP2        | brown |
| TFE3         | brown |
| TFG          | brown |
| TGFB1        | brown |
| TGFBI        | brown |
| TGOLN2       | brown |
| THG1L        | brown |
| THOC5        | brown |
| THRAP3       | brown |
| THUMPD2      | brown |
| TIAL1        | brown |
| TIMM8A       | brown |
| TIMM9        | brown |
| TIMP2        | brown |
| TINF2        | brown |
| TIPARP-AS1   | brown |
| TIRAP        | brown |

|           |       |
|-----------|-------|
| TJP2      | brown |
| TK2       | brown |
| TKT       | brown |
| TLE3      | brown |
| TLN1      | brown |
| TLR9      | brown |
| TM2D1     | brown |
| TM2D2     | brown |
| TM9SF1    | brown |
| TM9SF4    | brown |
| TMBIM1    | brown |
| TMBIM6    | brown |
| TMEM106C  | brown |
| TMEM107   | brown |
| TMEM116   | brown |
| TMEM117   | brown |
| TMEM119   | brown |
| TMEM127   | brown |
| TMEM131   | brown |
| TMEM132A  | brown |
| TMEM132E  | brown |
| TMEM140   | brown |
| TMEM14A   | brown |
| TMEM14C   | brown |
| TMEM156   | brown |
| TMEM164   | brown |
| TMEM177   | brown |
| TMEM18    | brown |
| TMEM184B  | brown |
| TMEM185A  | brown |
| TMEM19    | brown |
| TMEM191A  | brown |
| TMEM198   | brown |
| TMEM218   | brown |
| TMEM223   | brown |
| TMEM237   | brown |
| TMEM27    | brown |
| TMEM38A   | brown |
| TMEM41B   | brown |
| TMEM42    | brown |
| TMEM43    | brown |
| TMEM5     | brown |
| TMEM50B   | brown |
| TMEM62    | brown |
| TMEM67    | brown |
| TMEM68    | brown |
| TMEM86A   | brown |
| TMEM92    | brown |
| TMPPE     | brown |
| TMSB10    | brown |
| TMSB15B   | brown |
| TMTC4     | brown |
| TMUB2     | brown |
| TMX2      | brown |
| TNFAIP2   | brown |
| TNFRSF10C | brown |
| TNFRSF1B  | brown |
| TNFRSF9   | brown |
| TNFSF13   | brown |
| TNIP1     | brown |
| TNNC1     | brown |
| TNPO3     | brown |
| TNS3      | brown |
| TOE1      | brown |
| TOMM22    | brown |
| TOMM7     | brown |
| TOP3A     | brown |
| TOR3A     | brown |

|           |       |
|-----------|-------|
| TOX4      | brown |
| TP53BP2   | brown |
| TP53I11   | brown |
| TP53INP2  | brown |
| TP53RK    | brown |
| TP53TG1   | brown |
| TPCN2     | brown |
| TPD52L2   | brown |
| TPM3      | brown |
| TPM4      | brown |
| TPP1      | brown |
| TPRG1     | brown |
| TPRG1L    | brown |
| TRAIIP    | brown |
| TRAK1     | brown |
| TRANK1    | brown |
| TRAPPC2   | brown |
| TRAT1     | brown |
| TRERF1    | brown |
| TRIM16L   | brown |
| TRIM25    | brown |
| TRIM27    | brown |
| TRIM67    | brown |
| TRIM8     | brown |
| TRIOBP    | brown |
| TRMT11    | brown |
| TRMT61B   | brown |
| TRPC4AP   | brown |
| TSEN15    | brown |
| TSG101    | brown |
| TSIX      | brown |
| TSPAN31   | brown |
| TTC13     | brown |
| TTC19     | brown |
| TTC39B    | brown |
| TTC5      | brown |
| TTI1      | brown |
| TTLL4     | brown |
| TUFT1     | brown |
| TXNDC15   | brown |
| TXNDC5    | brown |
| TXNIP     | brown |
| UAP1      | brown |
| UBA1      | brown |
| UBAC2-AS1 | brown |
| UBAP1     | brown |
| UBAP2     | brown |
| UBAP2L    | brown |
| UBE2E3    | brown |
| UBE2H     | brown |
| UBE2V1    | brown |
| UBE3B     | brown |
| UBE4B     | brown |
| UBL5      | brown |
| UBN1      | brown |
| UFC1      | brown |
| UGGT1     | brown |
| UGT8      | brown |
| ULK1      | brown |
| UNC45B    | brown |
| UNC5B     | brown |
| UQCR10    | brown |
| UQCR11    | brown |
| USMG5     | brown |
| USP22     | brown |
| USP4      | brown |
| UTP18     | brown |
| UTP3      | brown |

|          |       |
|----------|-------|
| UTS2     | brown |
| UVRAG    | brown |
| VAMP2    | brown |
| VAMP8    | brown |
| VASP     | brown |
| VAV1     | brown |
| VCAN     | brown |
| VCL      | brown |
| VDR      | brown |
| VIM      | brown |
| VIPAR    | brown |
| VPS25    | brown |
| VPS35    | brown |
| VRK3     | brown |
| WAS      | brown |
| WASF2    | brown |
| WBP2     | brown |
| WBP5     | brown |
| WDFY4    | brown |
| WDR12    | brown |
| WDR61    | brown |
| WDR78    | brown |
| WDR82    | brown |
| WDYHV1   | brown |
| WHAMMP3  | brown |
| WIPF2    | brown |
| WIPI1    | brown |
| WIPI2    | brown |
| WNK1     | brown |
| WWC3     | brown |
| WWP2     | brown |
| XIAP     | brown |
| XKR7     | brown |
| XPA      | brown |
| XPO6     | brown |
| XPO7     | brown |
| XRCC6BP1 | brown |
| XRN2     | brown |
| XYLT1    | brown |
| YBEY     | brown |
| YEATS4   | brown |
| YIPF3    | brown |
| YRDC     | brown |
| YTHDF1   | brown |
| YTHDF2   | brown |
| YWHAB    | brown |
| YWHAG    | brown |
| YWHAH    | brown |
| YY1      | brown |
| YY1AP1   | brown |
| ZBED1    | brown |
| ZBTB37   | brown |
| ZBTB47   | brown |
| ZBTB5    | brown |
| ZC3H13   | brown |
| ZC3H3    | brown |
| ZC3H7A   | brown |
| ZC3HC1   | brown |
| ZCCHC24  | brown |
| ZCCHC3   | brown |
| ZDHHC18  | brown |
| ZDHHC3   | brown |
| ZDHHC5   | brown |
| ZDHHC7   | brown |
| ZER1     | brown |
| ZFAND2A  | brown |
| ZFAND3   | brown |
| ZFHX3    | brown |

|         |       |
|---------|-------|
| ZFP106  | brown |
| ZFP30   | brown |
| ZFP36L2 | brown |
| ZFP37   | brown |
| ZFYVE1  | brown |
| ZMIZ1   | brown |
| ZMYM6NB | brown |
| ZNF10   | brown |
| ZNF14   | brown |
| ZNF140  | brown |
| ZNF16   | brown |
| ZNF165  | brown |
| ZNF174  | brown |
| ZNF193  | brown |
| ZNF195  | brown |
| ZNF2    | brown |
| ZNF204P | brown |
| ZNF223  | brown |
| ZNF23   | brown |
| ZNF235  | brown |
| ZNF239  | brown |
| ZNF26   | brown |
| ZNF287  | brown |
| ZNF30   | brown |
| ZNF300  | brown |
| ZNF319  | brown |
| ZNF32   | brown |
| ZNF341  | brown |
| ZNF345  | brown |
| ZNF367  | brown |
| ZNF383  | brown |
| ZNF385A | brown |
| ZNF398  | brown |
| ZNF404  | brown |
| ZNF407  | brown |
| ZNF416  | brown |
| ZNF440  | brown |
| ZNF461  | brown |
| ZNF485  | brown |
| ZNF491  | brown |
| ZNF501  | brown |
| ZNF502  | brown |
| ZNF503  | brown |
| ZNF516  | brown |
| ZNF527  | brown |
| ZNF540  | brown |
| ZNF559  | brown |
| ZNF565  | brown |
| ZNF568  | brown |
| ZNF569  | brown |
| ZNF57   | brown |
| ZNF576  | brown |
| ZNF582  | brown |
| ZNF596  | brown |
| ZNF599  | brown |
| ZNF607  | brown |
| ZNF609  | brown |
| ZNF618  | brown |
| ZNF626  | brown |
| ZNF630  | brown |
| ZNF646  | brown |
| ZNF652  | brown |
| ZNF673  | brown |
| ZNF677  | brown |
| ZNF678  | brown |
| ZNF682  | brown |
| ZNF687  | brown |
| ZNF706  | brown |



|           |       |
|-----------|-------|
| ZNF710    | brown |
| ZNF713    | brown |
| ZNF720    | brown |
| ZNF749    | brown |
| ZNF766    | brown |
| ZNF77     | brown |
| ZNF790    | brown |
| ZNF823    | brown |
| ZNF83     | brown |
| ZNFX1     | brown |
| ZNRD1-AS1 | brown |
| ZSWIM7    | brown |
| ZYX       | brown |
| ZZEF1     | brown |

4-Sep cyan

|              |      |
|--------------|------|
| ACOT9        | cyan |
| ACP6         | cyan |
| ACTA2        | cyan |
| APOL1        | cyan |
| APOL2        | cyan |
| APOL4        | cyan |
| APOL6        | cyan |
| ASPHD2       | cyan |
| ATF3         | cyan |
| BATF2        | cyan |
| BTN2A2       | cyan |
| C2           | cyan |
| C7orf49      | cyan |
| CARD6        | cyan |
| CEACAM1      | cyan |
| CETP         | cyan |
| DTX3L        | cyan |
| EMR1         | cyan |
| ERP27        | cyan |
| ETV7         | cyan |
| FANCA        | cyan |
| FBXO6        | cyan |
| FTSJD2       | cyan |
| FZD5         | cyan |
| GAS8         | cyan |
| GBP1         | cyan |
| GBP2         | cyan |
| GBP4         | cyan |
| GBP5         | cyan |
| GPR19        | cyan |
| HCAR1        | cyan |
| ICAM1        | cyan |
| IFI16        | cyan |
| IFI35        | cyan |
| IRF1         | cyan |
| IRF9         | cyan |
| LACTB        | cyan |
| LAP3         | cyan |
| LHFPL2       | cyan |
| LOC100128191 | cyan |
| LOC100616668 | cyan |
| LOC641467    | cyan |
| LRRC18       | cyan |
| MB21D1       | cyan |
| MEX3B        | cyan |
| MLKL         | cyan |
| NRARP        | cyan |
| NUDT11       | cyan |
| OR52K2       | cyan |
| PARP14       | cyan |
| PARP9        | cyan |
| PML          | cyan |
| PSTPIP2      | cyan |

|          |              |
|----------|--------------|
| RAB20    | cyan         |
| RMI2     | cyan         |
| RNASEL   | cyan         |
| RNF222   | cyan         |
| SDC3     | cyan         |
| SERPING1 | cyan         |
| SHISA5   | cyan         |
| SLAMF8   | cyan         |
| SMTNL1   | cyan         |
| SORT1    | cyan         |
| SP100    | cyan         |
| SP110    | cyan         |
| STAT1    | cyan         |
| STAT2    | cyan         |
| TAP1     | cyan         |
| TGIF1    | cyan         |
| TRAFD1   | cyan         |
| TRIM21   | cyan         |
| TRIM38   | cyan         |
| TRIM5    | cyan         |
| UBE2L6   | cyan         |
| WARS     | cyan         |
| ZNF883   | cyan         |
|          | 10-Mar green |
|          | 2-Sep green  |
|          | 5-Sep green  |
| A2ML1    | green        |
| AAGAB    | green        |
| AASDH    | green        |
| AASS     | green        |
| ABCB7    | green        |
| ABCC11   | green        |
| ABHD11   | green        |
| ABHD16A  | green        |
| ABHD5    | green        |
| ABTB1    | green        |
| ACAA1    | green        |
| ACAD11   | green        |
| ACCN4    | green        |
| ACOXL    | green        |
| ACPT     | green        |
| ACSS3    | green        |
| ACTG2    | green        |
| ACVR2B   | green        |
| ADAD2    | green        |
| ADAM8    | green        |
| ADAMTS2  | green        |
| ADAMTS7  | green        |
| ADCK4    | green        |
| ADNP2    | green        |
| ADPRHL1  | green        |
| ADRA1A   | green        |
| AFAP1L2  | green        |
| AGAP7    | green        |
| AGPAT2   | green        |
| AGTRAP   | green        |
| AIPL1    | green        |
| AMOT     | green        |
| AMOTL2   | green        |
| AMPD2    | green        |
| AMPH     | green        |
| ANGPTL1  | green        |
| ANK2     | green        |
| ANKRD13D | green        |
| ANKRD2   | green        |
| ANKRD42  | green        |
| ANKRD5   | green        |
| ANKRD58  | green        |

|              |       |
|--------------|-------|
| ANO2         | green |
| ANTXRL       | green |
| ANXA2P2      | green |
| AOC3         | green |
| AP1M2        | green |
| AP1S3        | green |
| AP2S1        | green |
| AP4E1        | green |
| AP4M1        | green |
| APCDD1L      | green |
| APLP1        | green |
| APOBEC2      | green |
| AQP8         | green |
| AR           | green |
| ARF5         | green |
| ARHGAP9      | green |
| ARHGEF40     | green |
| ARL2BP       | green |
| ARL8A        | green |
| ARMCX3       | green |
| ARPC1B       | green |
| ARRB2        | green |
| ARSJ         | green |
| ART1         | green |
| ARTN         | green |
| AS3MT        | green |
| ASB12        | green |
| ASB14        | green |
| ASCC3        | green |
| ASF1B        | green |
| ASL          | green |
| ASPHD1       | green |
| ASS1         | green |
| ATAD5        | green |
| ATE1         | green |
| ATG2B        | green |
| ATL1         | green |
| ATMIN        | green |
| ATP2A1       | green |
| ATP2B2       | green |
| ATP6V0A2     | green |
| ATP6V0B      | green |
| ATP6V1G2     | green |
| ATPAF1       | green |
| ATR          | green |
| ATXN10       | green |
| ATXN3        | green |
| ATXN7L3B     | green |
| AURKAIP1     | green |
| AZU1         | green |
| B3GNT8       | green |
| B9D2         | green |
| BAG5         | green |
| BAI3         | green |
| BAIAP3       | green |
| BAK1         | green |
| BANP         | green |
| BARD1        | green |
| BAX          | green |
| BCAN         | green |
| BCAS1        | green |
| BCKDK        | green |
| BCL3         | green |
| BEND4        | green |
| BEX4         | green |
| BFAR         | green |
| BIN3         | green |
| BLOC1S1-RDH5 | green |

|                 |       |
|-----------------|-------|
| BMPR1B          | green |
| BTN2A3          | green |
| BTNL8           | green |
| C10orf103       | green |
| C10orf137       | green |
| C10orf18        | green |
| C10orf55        | green |
| C10orf67        | green |
| C11orf63        | green |
| C11orf92        | green |
| C12orf11        | green |
| C12orf66        | green |
| C12orf69        | green |
| C13orf33        | green |
| C13orf35        | green |
| C14orf178       | green |
| C15orf38-AP3S2  | green |
| C15orf41        | green |
| C15orf43        | green |
| C15orf56        | green |
| C17orf47        | green |
| C17orf51        | green |
| C17orf57        | green |
| C17orf61-PLSCR3 | green |
| C17orf80        | green |
| C19orf2         | green |
| C19orf35        | green |
| C19orf40        | green |
| C1orf226        | green |
| C1orf70         | green |
| C20orf144       | green |
| C20orf160       | green |
| C21orf71        | green |
| C2orf15         | green |
| C2orf55         | green |
| C2orf65         | green |
| C2orf82         | green |
| C3orf70         | green |
| C4orf38         | green |
| C4orf44         | green |
| C5orf42         | green |
| C5orf47         | green |
| C6orf192        | green |
| C6orf222        | green |
| C7orf43         | green |
| C7orf74         | green |
| C8orf73         | green |
| C9orf102        | green |
| C9orf125        | green |
| C9orf129        | green |
| C9orf5          | green |
| C9orf93         | green |
| CA7             | green |
| CABP1           | green |
| CACNB2          | green |
| CACNG1          | green |
| CAMK2B          | green |
| CAMKK1          | green |
| CAND1           | green |
| CAPN11          | green |
| CARD9           | green |
| CASK            | green |
| CASP7           | green |
| CASR            | green |
| CBX8            | green |
| CCDC144B        | green |
| CCDC15          | green |
| CCDC151         | green |

|             |       |
|-------------|-------|
| CCDC168     | green |
| CCDC17      | green |
| CCDC19      | green |
| CCDC50      | green |
| CCDC74A     | green |
| CCDC96      | green |
| CCIN        | green |
| CCL25       | green |
| CCL27       | green |
| CCL28       | green |
| CCNJ        | green |
| CD151       | green |
| CD164L2     | green |
| CD200R1L    | green |
| CD300A      | green |
| CD3G        | green |
| CDC14B      | green |
| CDC23       | green |
| CDH5        | green |
| CDK15       | green |
| CDK5        | green |
| CDK6        | green |
| CDKN2D      | green |
| CDYL        | green |
| CELA2B      | green |
| CENPC1      | green |
| CENPJ       | green |
| CEP128      | green |
| CEP192      | green |
| CEP68       | green |
| CEP76       | green |
| CERS1       | green |
| CERS4       | green |
| CERS6       | green |
| CHIC2       | green |
| CHRM4       | green |
| CHRM5       | green |
| CHRNA3      | green |
| CHST1       | green |
| CHST9-AS1   | green |
| CIB2        | green |
| CITED4      | green |
| CLASP2      | green |
| CLCN1       | green |
| CLDN10      | green |
| CLDN11      | green |
| CLEC10A     | green |
| CLEC18B     | green |
| CLEC4G      | green |
| CLIC5       | green |
| CLINT1      | green |
| CLLU1       | green |
| CLOCK       | green |
| CLTB        | green |
| CMAS        | green |
| CNIH2       | green |
| CNTN2       | green |
| COL16A1     | green |
| COL18A1     | green |
| COL23A1     | green |
| COL4A2      | green |
| COL9A1      | green |
| CORO7-PAM16 | green |
| COX6B1      | green |
| CP          | green |
| CPE         | green |
| CPNE4       | green |
| CPT1B       | green |

|               |       |
|---------------|-------|
| CPXM2         | green |
| CRISPLD1      | green |
| CRTAP         | green |
| CRYZL1        | green |
| CSE1L         | green |
| CSPG5         | green |
| CSPP1         | green |
| CTAGE7P       | green |
| CTLA4         | green |
| CTNNBIP1      | green |
| CTNND2        | green |
| CTRL          | green |
| CUEDC1        | green |
| CWC27         | green |
| CXCL2         | green |
| CXCL3         | green |
| CYP11B1       | green |
| CYP1A1        | green |
| CYP2A7        | green |
| CYP2D7P1      | green |
| CYP4V2        | green |
| DAAM2         | green |
| DARS          | green |
| DBT           | green |
| DCAF17        | green |
| DCTN3         | green |
| DDAH2         | green |
| DDHD1         | green |
| DDN           | green |
| DDX1          | green |
| DEDD2         | green |
| DGAT1         | green |
| DHRS7B        | green |
| DHX29         | green |
| DIP2C         | green |
| DISP1         | green |
| DKFZp566F0947 | green |
| DLEU2L        | green |
| DLL3          | green |
| DNAH2         | green |
| DNAH9         | green |
| DNAJA2        | green |
| DNAJB7        | green |
| DNAJC2        | green |
| DNAJC8        | green |
| DNER          | green |
| DNM1L         | green |
| DNM1P46       | green |
| DNTTIP1       | green |
| DOCK3         | green |
| DOK1          | green |
| DOK6          | green |
| DOPEY1        | green |
| DPEP3         | green |
| DPPA4         | green |
| DRD3          | green |
| DSTN          | green |
| DTWD2         | green |
| DUSP1         | green |
| DYNC1I1       | green |
| DYNC2H1       | green |
| DYSFIP1       | green |
| EBPL          | green |
| ECE2          | green |
| EDNRB         | green |
| EEF1DP3       | green |
| EFCAB3        | green |
| EFCAB4A       | green |

|          |       |
|----------|-------|
| EGFEM1P  | green |
| EGFL8    | green |
| EI24     | green |
| EIF1B    | green |
| EIF2C3   | green |
| EIF2S1   | green |
| EIF4EBP1 | green |
| EIF4EBP3 | green |
| ELANE    | green |
| ELF3     | green |
| ELFN1    | green |
| ELP2     | green |
| EML4     | green |
| EMP2     | green |
| ENPP7    | green |
| EPCAM    | green |
| EPHA4    | green |
| EPM2A    | green |
| EPO      | green |
| EPOR     | green |
| ERAP1    | green |
| ERCC4    | green |
| ERCC6    | green |
| ERMP1    | green |
| ERRFI1   | green |
| ESRRA    | green |
| ESRRB    | green |
| ETV3L    | green |
| EXD1     | green |
| EXOSC4   | green |
| F3       | green |
| FAAH     | green |
| FAAH2    | green |
| FADD     | green |
| FAH      | green |
| FAM100B  | green |
| FAM107B  | green |
| FAM114A2 | green |
| FAM115C  | green |
| FAM116B  | green |
| FAM124A  | green |
| FAM131A  | green |
| FAM151A  | green |
| FAM166B  | green |
| FAM170B  | green |
| FAM176A  | green |
| FAM178A  | green |
| FAM180B  | green |
| FAM182B  | green |
| FAM18A   | green |
| FAM190B  | green |
| FAM27A   | green |
| FAM55C   | green |
| FAM74A1  | green |
| FAM83E   | green |
| FAM83F   | green |
| FANCC    | green |
| FANCD2   | green |
| FASTKD2  | green |
| FAT1     | green |
| FBLN1    | green |
| FBXO15   | green |
| FBXO32   | green |
| FBXO36   | green |
| FBXO43   | green |
| FCGRT    | green |
| FCN2     | green |
| FER1L5   | green |

|          |       |
|----------|-------|
| FGF17    | green |
| FGF18    | green |
| FHOD3    | green |
| FKBP14   | green |
| FKBP1    | green |
| FKTN     | green |
| FLJ20021 | green |
| FLJ22447 | green |
| FLJ34208 | green |
| FLJ40194 | green |
| FLJ43860 | green |
| FMO4     | green |
| FOS      | green |
| FOXD4L1  | green |
| FOXO1    | green |
| FOXO3B   | green |
| FRAT1    | green |
| FRAT2    | green |
| FRMD5    | green |
| FRYL     | green |
| FSTL3    | green |
| FTH1     | green |
| FUBP3    | green |
| FUT1     | green |
| FUT3     | green |
| FUT7     | green |
| FUT8     | green |
| FUZ      | green |
| FZD9     | green |
| G3BP2    | green |
| GABARAP  | green |
| GABRD    | green |
| GADD45G  | green |
| GALK1    | green |
| GALNTL4  | green |
| GALR2    | green |
| GAN      | green |
| GARNL3   | green |
| GATAD1   | green |
| GATM     | green |
| GATSL2   | green |
| GCLC     | green |
| GEMIN8P4 | green |
| GGT5     | green |
| GJA4     | green |
| GJB3     | green |
| GJB5     | green |
| GJB7     | green |
| GJC1     | green |
| GJC2     | green |
| GJD4     | green |
| GLDN     | green |
| GLIS2    | green |
| GNB2     | green |
| GNB3     | green |
| GNG4     | green |
| GNG5     | green |
| GNN      | green |
| GNPAT    | green |
| GNPNAT1  | green |
| GNPTAB   | green |
| GNRHR    | green |
| GOLGA6A  | green |
| GOLGA8B  | green |
| GOLT1A   | green |
| GPD1L    | green |
| GPLD1    | green |
| GPM6B    | green |



|           |       |
|-----------|-------|
| GPR108    | green |
| GPR125    | green |
| GPR161    | green |
| GPR162    | green |
| GPR176    | green |
| GPR37L1   | green |
| GPR62     | green |
| GPR77     | green |
| GPR85     | green |
| GPSM3     | green |
| GPX3      | green |
| GRB7      | green |
| GRIA4     | green |
| GRID1     | green |
| GRIK3     | green |
| GRM4      | green |
| GRSF1     | green |
| GSDMD     | green |
| GSG1L     | green |
| GSPT2     | green |
| GSTCD     | green |
| GSTK1     | green |
| GSTZ1     | green |
| GTF2H3    | green |
| GTF3C3    | green |
| GUSBP2    | green |
| GVINP1    | green |
| HAPLN2    | green |
| HAS3      | green |
| HAUS2     | green |
| HAVCR1    | green |
| HDAC2     | green |
| HELQ      | green |
| HERC2P2   | green |
| HERC2P9   | green |
| HES1      | green |
| HEXIM2    | green |
| HHATL     | green |
| HIBCH     | green |
| HIST1H1C  | green |
| HIST1H2AD | green |
| HIST1H2AE | green |
| HIST1H2BK | green |
| HIST1H2BO | green |
| HIST1H3A  | green |
| HIST1H3D  | green |
| HIST1H3H  | green |
| HIST2H2AB | green |
| HLA-F     | green |
| HLX       | green |
| HMBOX1    | green |
| HMGA2     | green |
| HMP19     | green |
| HN1       | green |
| HNF1A-AS1 | green |
| HNRNPA1L2 | green |
| HOMER3    | green |
| HOXB6     | green |
| HPCA      | green |
| HPN       | green |
| HRH3      | green |
| HSD3B7    | green |
| HSP90AA1  | green |
| HTR3B     | green |
| HTRA3     | green |
| HUS1      | green |
| HUS1B     | green |
| HYAL3     | green |

|           |       |
|-----------|-------|
| ICAM3     | green |
| ICAM5     | green |
| IER2      | green |
| IER3      | green |
| IFITM10   | green |
| IFITM2    | green |
| IFITM4P   | green |
| IGFBP2    | green |
| IGFLR1    | green |
| IGLON5    | green |
| IGSF23    | green |
| IHH       | green |
| IL15RA    | green |
| IL17RC    | green |
| IMPA2     | green |
| INPP4B    | green |
| INPP5F    | green |
| INPP5J    | green |
| INSL3     | green |
| INSRR     | green |
| INTS10    | green |
| INTU      | green |
| IPO7      | green |
| IPPK      | green |
| IRGC      | green |
| ISG20     | green |
| ISL2      | green |
| ITGA7     | green |
| ITGB1     | green |
| ITK       | green |
| ITLN2     | green |
| ITPKA     | green |
| ITPR1     | green |
| JDP2      | green |
| KATNAL2   | green |
| KCNA3     | green |
| KCNB1     | green |
| KCNE1L    | green |
| KCNH3     | green |
| KCNJ12    | green |
| KCNQ5     | green |
| KCTD4     | green |
| KDSR      | green |
| KIAA0146  | green |
| KIAA0528  | green |
| KIAA0564  | green |
| KIAA0907  | green |
| KIAA1045  | green |
| KIAA1161  | green |
| KIAA1199  | green |
| KIAA1244  | green |
| KIAA1279  | green |
| KIAA1328  | green |
| KIAA1407  | green |
| KIAA1462  | green |
| KIAA1737  | green |
| KIFAP3    | green |
| KLFB12    | green |
| KLHL11    | green |
| KPTN      | green |
| KRIT1     | green |
| KRT36     | green |
| KRTAP10-2 | green |
| KRTAP16-1 | green |
| KSR2      | green |
| L3MBTL3   | green |
| LAD1      | green |
| LAMA3     | green |

|              |       |
|--------------|-------|
| LCA5L        | green |
| LCTL         | green |
| LDHD         | green |
| LEFTY1       | green |
| LENG9        | green |
| LETM2        | green |
| LILRA2       | green |
| LIMA1        | green |
| LIN37        | green |
| LMOD1        | green |
| LOC100128126 | green |
| LOC100128252 | green |
| LOC100128398 | green |
| LOC100128542 | green |
| LOC100128590 | green |
| LOC100129924 | green |
| LOC100130231 | green |
| LOC100130691 | green |
| LOC100130890 | green |
| LOC100130987 | green |
| LOC100131067 | green |
| LOC100131089 | green |
| LOC100132111 | green |
| LOC100132707 | green |
| LOC100133920 | green |
| LOC100133985 | green |
| LOC100271702 | green |
| LOC100286844 | green |
| LOC100287216 | green |
| LOC100288181 | green |
| LOC100288637 | green |
| LOC100302650 | green |
| LOC100505658 | green |
| LOC100505746 | green |
| LOC100505817 | green |
| LOC100506190 | green |
| LOC100506274 | green |
| LOC100506649 | green |
| LOC100506757 | green |
| LOC100506994 | green |
| LOC100507173 | green |
| LOC100507299 | green |
| LOC100507351 | green |
| LOC100507387 | green |
| LOC100507392 | green |
| LOC100507564 | green |
| LOC100507567 | green |
| LOC100507577 | green |
| LOC100507589 | green |
| LOC113230    | green |
| LOC200261    | green |
| LOC219347    | green |
| LOC219731    | green |
| LOC220729    | green |
| LOC282997    | green |
| LOC283392    | green |
| LOC283440    | green |
| LOC283624    | green |
| LOC284276    | green |
| LOC284454    | green |
| LOC284648    | green |
| LOC284950    | green |
| LOC286367    | green |
| LOC339902    | green |
| LOC340544    | green |
| LOC400685    | green |
| LOC400891    | green |
| LOC401074    | green |

|               |       |
|---------------|-------|
| LOC402160     | green |
| LOC440900     | green |
| LOC642852     | green |
| LOC643406     | green |
| LOC645166     | green |
| LOC648740     | green |
| LOC650623     | green |
| LOC653786     | green |
| LOC728723     | green |
| LOC729082     | green |
| LOC729799     | green |
| LOC731223     | green |
| LOC80054      | green |
| LOC92659      | green |
| LPPR4         | green |
| LRP1B         | green |
| LRP2BP        | green |
| LRP3          | green |
| LRPPRC        | green |
| LRR37B        | green |
| LRR37BP1      | green |
| LRR49         | green |
| LTBR          | green |
| LTV1          | green |
| LUM           | green |
| LY6G5C        | green |
| LYPD1         | green |
| LYPD4         | green |
| LYRM7         | green |
| MADCAM1       | green |
| MAFF          | green |
| MAGEE1        | green |
| MAGIX         | green |
| MAP1LC3A      | green |
| MAP1LC3B      | green |
| MAP3K6        | green |
| MAP6          | green |
| MAP7          | green |
| MAPK10        | green |
| MAPK3         | green |
| MASTL         | green |
| MAT2A         | green |
| MCART1        | green |
| MCART6        | green |
| MCFD2         | green |
| MCM8          | green |
| MCOLN2        | green |
| MCPH1         | green |
| MED17         | green |
| MEF2BNB       | green |
| MEF2BNB-MEF2B | green |
| MEGF11        | green |
| MEIS3         | green |
| MEP1B         | green |
| MESP2         | green |
| MET           | green |
| METRNL        | green |
| METTL8        | green |
| MFAP2         | green |
| MFSD6         | green |
| MGC23284      | green |
| MGC2752       | green |
| MIIP          | green |
| MIOS          | green |
| MKL2          | green |
| MLK7-AS1      | green |
| MLLT10        | green |
| MLX           | green |

|             |       |
|-------------|-------|
| MMP2        | green |
| MOCOS       | green |
| MORF4L1     | green |
| MOV10L1     | green |
| MPHOSPH10   | green |
| MPHOSPH9    | green |
| MPPPE1      | green |
| MPST        | green |
| MPZL1       | green |
| MRE11A      | green |
| MRS2        | green |
| MSTN        | green |
| MT1DP       | green |
| MT1G        | green |
| MTAP        | green |
| MTCH1       | green |
| MTDH        | green |
| MTFMT       | green |
| MTL5        | green |
| MTMR11      | green |
| MTMR8       | green |
| MTRNR2L2    | green |
| MTRNR2L4    | green |
| MTX1        | green |
| MVP         | green |
| MYBPC3      | green |
| MYEF2       | green |
| MYEOV       | green |
| MYLPF       | green |
| MYO1B       | green |
| MYO7B       | green |
| MYO9A       | green |
| NAA15       | green |
| NAA35       | green |
| NANOG       | green |
| NANOS3      | green |
| NAPRT1      | green |
| NBEAL1      | green |
| NBPF3       | green |
| NCBP1       | green |
| NCBP2       | green |
| NCF1        | green |
| NCF1B       | green |
| NCF1C       | green |
| NCRNA00085  | green |
| NCRNA00222  | green |
| NCRNA00242  | green |
| NCRNA00256B | green |
| NCRNA00285  | green |
| NCRNA00323  | green |
| NDUFA4L2    | green |
| NEK4        | green |
| NEURL3      | green |
| NFIB        | green |
| NFKBID      | green |
| NHLRC3      | green |
| NINJ1       | green |
| NINJ2       | green |
| NIP7        | green |
| NIPAL2      | green |
| NIT1        | green |
| NKAIN2      | green |
| NKTR        | green |
| NLRP4       | green |
| NOL3        | green |
| NOL8        | green |
| NOS1AP      | green |
| NOV         | green |

|              |       |
|--------------|-------|
| NPAT         | green |
| NPC2         | green |
| NPHP3-ACAD11 | green |
| NPM2         | green |
| NR1H3        | green |
| NR2C2        | green |
| NRTN         | green |
| NRXN1        | green |
| NSUN6        | green |
| NUDT13       | green |
| NUFIP1       | green |
| NUP107       | green |
| NUP160       | green |
| NUP88        | green |
| NXF3         | green |
| NXNL2        | green |
| NYX          | green |
| OBSL1        | green |
| OGT          | green |
| OIT3         | green |
| OLFML3       | green |
| OR52W1       | green |
| ORAI3        | green |
| ORC5         | green |
| OSGIN1       | green |
| OSTCL        | green |
| OTUB1        | green |
| OTUD3        | green |
| OXGR1        | green |
| P4HA2        | green |
| PABPN1L      | green |
| PACSIN3      | green |
| PANX2        | green |
| PARG         | green |
| PARP2        | green |
| PAX9         | green |
| PBRM1        | green |
| PCBD2        | green |
| PCBP3        | green |
| PCDH17       | green |
| PCDHGB7      | green |
| PCDHGC5      | green |
| PCGF2        | green |
| PCTP         | green |
| PDCL         | green |
| PDE12        | green |
| PDE2A        | green |
| PDE4C        | green |
| PDE8A        | green |
| PDIA2        | green |
| PDLIM7       | green |
| PDP2         | green |
| PDS5A        | green |
| PDS52        | green |
| PDZD2        | green |
| PECR         | green |
| PENK         | green |
| PEX19        | green |
| PGA5         | green |
| PGAP2        | green |
| PGLS         | green |
| PGPEP1L      | green |
| PGRMC2       | green |
| PHACTR2      | green |
| PHF14        | green |
| PHLDA2       | green |
| PIAS2        | green |
| PIGN         | green |

|             |       |
|-------------|-------|
| PIGX        | green |
| PIH1D2      | green |
| PIK3R1      | green |
| PISD        | green |
| PIWIL2      | green |
| PKD2L1      | green |
| PLAA        | green |
| PLEKHA5     | green |
| PLEKHG7     | green |
| PLEKHO1     | green |
| PLK3        | green |
| PLP2        | green |
| PMF1-BGLAP  | green |
| PMFBP1      | green |
| PNMA6C      | green |
| POC1A       | green |
| POLR2D      | green |
| PON2        | green |
| POR         | green |
| PPAP2A      | green |
| PPCDC       | green |
| PPHLN1      | green |
| PPM1M       | green |
| PPP1R8      | green |
| PPP2CA      | green |
| PQLC1       | green |
| PRDM7       | green |
| PRELID1     | green |
| PRIM2       | green |
| PRKCE       | green |
| PRKG1       | green |
| PRNP        | green |
| PRO0611     | green |
| PRPF38A     | green |
| PRR13       | green |
| PRR15       | green |
| PRR24       | green |
| PRRG2       | green |
| PRRT4       | green |
| PRSS1       | green |
| PRTN3       | green |
| PSCA        | green |
| PSIMCT-1    | green |
| PSMB10      | green |
| PSMB8       | green |
| PSMB9       | green |
| PSMD5       | green |
| PSME2       | green |
| PSRC1       | green |
| PTCD2       | green |
| PTGER1      | green |
| PTGES3      | green |
| PTP4A2      | green |
| PTP4A3      | green |
| PTPN11      | green |
| PTPN14      | green |
| PTPN21      | green |
| PUS7        | green |
| PVRL4       | green |
| PYCARD      | green |
| PYGM        | green |
| RAB13       | green |
| RAB30       | green |
| RAB34       | green |
| RAB40C      | green |
| RAB4B-EGLN2 | green |
| RABAC1      | green |
| RABGAP1L    | green |

|              |       |
|--------------|-------|
| RAD50        | green |
| RAD52        | green |
| RADIL        | green |
| RALGAPA1     | green |
| RANBP2       | green |
| RARA         | green |
| RASGEF1B     | green |
| RASGRP1      | green |
| RASSF6       | green |
| RBL1         | green |
| RBM12        | green |
| RBM14-RBM4   | green |
| RBM45        | green |
| RBMS3        | green |
| RBMX         | green |
| RECK         | green |
| REEP2        | green |
| RELL1        | green |
| RELT         | green |
| REM2         | green |
| RFXANK       | green |
| RGL2         | green |
| RGS11        | green |
| RGS14        | green |
| RGS19        | green |
| RGS2         | green |
| RHBDL1       | green |
| RHOB         | green |
| RHOD         | green |
| RHOG         | green |
| RILPL2       | green |
| RNASEK       | green |
| RNF103-VPS24 | green |
| RNF168       | green |
| RNF208       | green |
| ROBO4        | green |
| ROGDI        | green |
| ROM1         | green |
| RPGRIP1      | green |
| RPGRIP1L     | green |
| RPL7L1       | green |
| RPPH1        | green |
| RPRML        | green |
| RRAGD        | green |
| RRN3P2       | green |
| RSPH1        | green |
| RTDR1        | green |
| RTN2         | green |
| S100A2       | green |
| S100A3       | green |
| S100A5       | green |
| S100Z        | green |
| S1PR4        | green |
| SAV1         | green |
| SBNO1        | green |
| SCAND1       | green |
| SCGB3A2      | green |
| SCML2        | green |
| SCN1B        | green |
| SCNM1        | green |
| SCRT1        | green |
| SCT          | green |
| SDC2         | green |
| SDCCAG8      | green |
| SDSL         | green |
| SEC23IP      | green |
| SEC63        | green |
| SEMA3B       | green |



|          |       |
|----------|-------|
| SEMA3D   | green |
| SEMG1    | green |
| SEPHS1P  | green |
| SEPX1    | green |
| SERBP1   | green |
| SERTAD1  | green |
| SET      | green |
| SFN      | green |
| SFT2D2   | green |
| SFXN5    | green |
| SGK2     | green |
| SGOL1    | green |
| SH2B2    | green |
| SH3D21   | green |
| SHOX2    | green |
| SHPRH    | green |
| SHQ1     | green |
| SHROOM1  | green |
| SHROOM2  | green |
| SIRT6    | green |
| SIRT7    | green |
| SLC15A3  | green |
| SLC16A3  | green |
| SLC16A5  | green |
| SLC19A1  | green |
| SLC22A31 | green |
| SLC24A2  | green |
| SLC25A16 | green |
| SLC25A30 | green |
| SLC30A4  | green |
| SLC31A2  | green |
| SLC35F1  | green |
| SLC38A1  | green |
| SLC39A1  | green |
| SLC39A4  | green |
| SLC39A6  | green |
| SLC44A4  | green |
| SLC45A2  | green |
| SLC4A8   | green |
| SLC7A10  | green |
| SLC9B2   | green |
| SLCO2B1  | green |
| SLFN11   | green |
| SLFN14   | green |
| SLIT3    | green |
| SMAD6    | green |
| SMC1B    | green |
| SMC3     | green |
| SMPDL3B  | green |
| SNAI3    | green |
| SNAPC3   | green |
| SNCG     | green |
| SNORA12  | green |
| SNORA45  | green |
| SNORA74B | green |
| SNORA78  | green |
| SNX11    | green |
| SNX5     | green |
| SPAG6    | green |
| SPATA2L  | green |
| SPATA5L1 | green |
| SPEF1    | green |
| SPERT    | green |
| SPESP1   | green |
| SPHK1    | green |
| SPI1     | green |
| SPICE1   | green |
| SPIN1    | green |

|          |       |
|----------|-------|
| SPNS2    | green |
| SPOCK3   | green |
| SRA1     | green |
| SRCIN1   | green |
| SRCRB4D  | green |
| SRFBP1   | green |
| SRP72    | green |
| SRR      | green |
| SRSF9    | green |
| SSB      | green |
| SSH3     | green |
| SSTR2    | green |
| ST7-AS1  | green |
| ST8SIA1  | green |
| STARD10  | green |
| STIM2    | green |
| STK19    | green |
| STX10    | green |
| SULT1A2  | green |
| SUN3     | green |
| SVEP1    | green |
| SYNCRIP  | green |
| SYNDIG1L | green |
| SYNJ2BP  | green |
| SYNPO2L  | green |
| SYPL1    | green |
| SYPL2    | green |
| SYT6     | green |
| SYT9     | green |
| TAF1B    | green |
| TAF4B    | green |
| TAF5L    | green |
| TAPT1    | green |
| TARSL2   | green |
| TAS1R1   | green |
| TAS2R20  | green |
| TAS2R5   | green |
| TBCK     | green |
| TCAM1P   | green |
| TCERG1   | green |
| TCF12    | green |
| TCIRG1   | green |
| TCN1     | green |
| TDRD3    | green |
| TERC     | green |
| TERF1    | green |
| TEX21P   | green |
| TFB1M    | green |
| TFEB     | green |
| THBD     | green |
| THBS1    | green |
| THRSF    | green |
| TIGD3    | green |
| TIPIN    | green |
| TLL2     | green |
| TM7SF3   | green |
| TMCO6    | green |
| TMEM105  | green |
| TMEM11   | green |
| TMEM120A | green |
| TMEM125  | green |
| TMEM130  | green |
| TMEM132B | green |
| TMEM191C | green |
| TMEM194A | green |
| TMEM205  | green |
| TMEM213  | green |
| TMEM232  | green |

|                 |       |
|-----------------|-------|
| TMEM234         | green |
| TMEM39A         | green |
| TMEM41A         | green |
| TMEM54          | green |
| TMEM87A         | green |
| TMEM88          | green |
| TMEM8A          | green |
| TMEM91          | green |
| TMEM97          | green |
| TMPRSS4         | green |
| TNC             | green |
| TNFAIP8L2       | green |
| TNFRSF12A       | green |
| TNFSF12-TNFSF13 | green |
| TNFSF8          | green |
| TNKS            | green |
| TOMM70A         | green |
| TPD52           | green |
| TPH1            | green |
| TPO             | green |
| TPP2            | green |
| TPST1           | green |
| TRAK2           | green |
| TREML2P1        | green |
| TRIM31          | green |
| TRIM32          | green |
| TRIM37          | green |
| TRIM7           | green |
| TRIP11          | green |
| TRIP6           | green |
| TRMT5           | green |
| TRMT6           | green |
| TRPM4           | green |
| TSC22D3         | green |
| TSEN34          | green |
| TSLP            | green |
| TSN             | green |
| TSPAN4          | green |
| TSPEAR          | green |
| TSPO            | green |
| TSPYL1          | green |
| TSPYL5          | green |
| TST             | green |
| TTBK2           | green |
| TTC21B          | green |
| TTC36           | green |
| TTC37           | green |
| TTF2            | green |
| TUBA1A          | green |
| TUBA1C          | green |
| TUBA4A          | green |
| TXNDC6          | green |
| TYROBP          | green |
| UBAC1           | green |
| UBD             | green |
| UBE2C           | green |
| UBE2CBP         | green |
| UBE2S           | green |
| UBN2            | green |
| UBP1            | green |
| UBTD1           | green |
| UBXN2A          | green |
| UHRF2           | green |
| UMPS            | green |
| UNC119          | green |
| UNC5C           | green |
| UNC93B1         | green |
| UPF3B           | green |

|         |       |
|---------|-------|
| UPK2    | green |
| UPP1    | green |
| UPRT    | green |
| USF1    | green |
| USHBP1  | green |
| USP10   | green |
| USP47   | green |
| UST     | green |
| UTP6    | green |
| VAMP5   | green |
| VGf     | green |
| VPREB1  | green |
| VPS37C  | green |
| VSIG8   | green |
| VWA5B1  | green |
| WDR13   | green |
| WDR19   | green |
| WDR25   | green |
| WDR48   | green |
| WDR7    | green |
| WDR76   | green |
| WDR92   | green |
| WDSUB1  | green |
| WFDC2   | green |
| WFDC3   | green |
| WFIKKN2 | green |
| WISP3   | green |
| WNK2    | green |
| WNK3    | green |
| WNT11   | green |
| WRN     | green |
| XIRP2   | green |
| XKR8    | green |
| XPO4    | green |
| XPOT    | green |
| XYLB    | green |
| YAP1    | green |
| YARS2   | green |
| YPEL2   | green |
| YPEL3   | green |
| YSK4    | green |
| ZACN    | green |
| ZBTB44  | green |
| ZC3H12A | green |
| ZC3H6   | green |
| ZC3H8   | green |
| ZCCHC4  | green |
| ZDHHC23 | green |
| ZFP90   | green |
| ZFPL1   | green |
| ZIK1    | green |
| ZKSCAN3 | green |
| ZMAT5   | green |
| ZNF134  | green |
| ZNF160  | green |
| ZNF19   | green |
| ZNF192  | green |
| ZNF20   | green |
| ZNF205  | green |
| ZNF229  | green |
| ZNF250  | green |
| ZNF280B | green |
| ZNF284  | green |
| ZNF285  | green |
| ZNF286B | green |
| ZNF304  | green |
| ZNF37A  | green |
| ZNF37BP | green |

|          |             |
|----------|-------------|
| ZNF385D  | green       |
| ZNF41    | green       |
| ZNF426   | green       |
| ZNF431   | green       |
| ZNF436   | green       |
| ZNF45    | green       |
| ZNF467   | green       |
| ZNF471   | green       |
| ZNF473   | green       |
| ZNF483   | green       |
| ZNF506   | green       |
| ZNF550   | green       |
| ZNF551   | green       |
| ZNF573   | green       |
| ZNF577   | green       |
| ZNF616   | green       |
| ZNF625   | green       |
| ZNF660   | green       |
| ZNF664   | green       |
| ZNF665   | green       |
| ZNF667   | green       |
| ZNF669   | green       |
| ZNF695   | green       |
| ZNF699   | green       |
| ZNF7     | green       |
| ZNF714   | green       |
| ZNF737   | green       |
| ZNF746   | green       |
| ZNF768   | green       |
| ZNF775   | green       |
| ZNF778   | green       |
| ZNF805   | green       |
| ZNF81    | green       |
| ZNF846   | green       |
| ZSCAN20  | green       |
| ZSCAN30  | green       |
| ADAMTS1  | greenyellow |
| AGAP1    | greenyellow |
| APOBEC3G | greenyellow |
| APOBEC3H | greenyellow |
| ARL4C    | greenyellow |
| AUTS2    | greenyellow |
| B3GAT1   | greenyellow |
| B3GNT7   | greenyellow |
| BAI2     | greenyellow |
| BFSP1    | greenyellow |
| BNC2     | greenyellow |
| BZRAP1   | greenyellow |
| C14orf1  | greenyellow |
| C17orf66 | greenyellow |
| C1orf174 | greenyellow |
| C1orf177 | greenyellow |
| C1orf187 | greenyellow |
| C1orf21  | greenyellow |
| C8orf80  | greenyellow |
| CACNA2D2 | greenyellow |
| CAMK2N1  | greenyellow |
| CCL4     | greenyellow |
| CCL5     | greenyellow |
| CCR5     | greenyellow |
| CD160    | greenyellow |
| CD2      | greenyellow |
| CEP78    | greenyellow |
| CHST10   | greenyellow |
| CLDND2   | greenyellow |
| CLIC3    | greenyellow |
| CX3CR1   | greenyellow |
| CXCR6    | greenyellow |

|              |             |
|--------------|-------------|
| DLG5         | greenyellow |
| DTHD1        | greenyellow |
| DUSP8        | greenyellow |
| EDARADD      | greenyellow |
| EFNA5        | greenyellow |
| EOMES        | greenyellow |
| EPB41L4A     | greenyellow |
| EPDR1        | greenyellow |
| EPHX4        | greenyellow |
| ERBB2        | greenyellow |
| F2R          | greenyellow |
| FAM131B      | greenyellow |
| FAM179A      | greenyellow |
| FASLG        | greenyellow |
| FCRL6        | greenyellow |
| FEZ1         | greenyellow |
| FGFBP2       | greenyellow |
| FZD4         | greenyellow |
| GFI1         | greenyellow |
| GFPT2        | greenyellow |
| GLB1L2       | greenyellow |
| GNLY         | greenyellow |
| GPR114       | greenyellow |
| GPR153       | greenyellow |
| GPR56        | greenyellow |
| GPR68        | greenyellow |
| GZMB         | greenyellow |
| GZMH         | greenyellow |
| HOXC4        | greenyellow |
| HOXC5        | greenyellow |
| ITPR1L1      | greenyellow |
| JAKMIP1      | greenyellow |
| JAKMIP2      | greenyellow |
| KIAA1671     | greenyellow |
| KIF19        | greenyellow |
| KIR2DL1      | greenyellow |
| KIR3DX1      | greenyellow |
| KLRD1        | greenyellow |
| KLRG1        | greenyellow |
| LAG3         | greenyellow |
| LDB2         | greenyellow |
| LDOC1L       | greenyellow |
| LGR6         | greenyellow |
| LIM2         | greenyellow |
| LLGL2        | greenyellow |
| LOC100129083 | greenyellow |
| LOC100129316 | greenyellow |
| LOC100130872 | greenyellow |
| LOC100188949 | greenyellow |
| LOC100499405 | greenyellow |
| LOC100507206 | greenyellow |
| LOC283177    | greenyellow |
| LRRC16B      | greenyellow |
| MANEAL       | greenyellow |
| MGC12982     | greenyellow |
| MSC          | greenyellow |
| MTSS1        | greenyellow |
| MYO3B        | greenyellow |
| NCALD        | greenyellow |
| NCAM1        | greenyellow |
| NEB          | greenyellow |
| NKG7         | greenyellow |
| NMUR1        | greenyellow |
| NPC1         | greenyellow |
| NUAK1        | greenyellow |
| PAK6         | greenyellow |
| PATL2        | greenyellow |
| PCDH1        | greenyellow |

|           |             |
|-----------|-------------|
| PDGFRB    | greenyellow |
| PDZD4     | greenyellow |
| PIK3R3    | greenyellow |
| PODN      | greenyellow |
| PPP2R2B   | greenyellow |
| PRR5L     | greenyellow |
| PRSS23    | greenyellow |
| PTCH1     | greenyellow |
| PTGDR     | greenyellow |
| PYHIN1    | greenyellow |
| RAB11FIP5 | greenyellow |
| RAB7L1    | greenyellow |
| RASGEF1A  | greenyellow |
| RCAN2     | greenyellow |
| RGNEF     | greenyellow |
| RGS9      | greenyellow |
| RNF165    | greenyellow |
| S1PR5     | greenyellow |
| SAMD3     | greenyellow |
| SCD5      | greenyellow |
| SGCD      | greenyellow |
| SGSM1     | greenyellow |
| SH2D1B    | greenyellow |
| SH2D2A    | greenyellow |
| SH3RF2    | greenyellow |
| SIGLECP3  | greenyellow |
| SLAMF6    | greenyellow |
| SLAMF7    | greenyellow |
| SLC1A7    | greenyellow |
| SMAD7     | greenyellow |
| SOX13     | greenyellow |
| SPON2     | greenyellow |
| SYT11     | greenyellow |
| SYTL2     | greenyellow |
| TARP      | greenyellow |
| TBX21     | greenyellow |
| TIGIT     | greenyellow |
| TM4SF19   | greenyellow |
| TOX       | greenyellow |
| TTC16     | greenyellow |
| TTC38     | greenyellow |
| USP28     | greenyellow |
| VANGL1    | greenyellow |
| VIT       | greenyellow |
| WNT1      | greenyellow |
| XPNPEP2   | greenyellow |
| YPEL1     | greenyellow |
| YWHAQ     | greenyellow |
| ZFYVE28   | greenyellow |
| ZNF683    | greenyellow |

3-Sep grey

|        |      |
|--------|------|
| A2M    | grey |
| A2MP1  | grey |
| ABCA13 | grey |
| ABCA6  | grey |
| ABCA9  | grey |
| ABCC9  | grey |
| ABI3BP | grey |
| ABP1   | grey |
| ABRA   | grey |
| ACAN   | grey |
| ACBD7  | grey |
| ACER1  | grey |
| ACOT1  | grey |
| ACOT4  | grey |
| ACSBG2 | grey |
| ACTN3  | grey |
| ACTR3B | grey |

|            |      |
|------------|------|
| ACTR3C     | grey |
| ADAM20     | grey |
| ADAM21     | grey |
| ADAM33     | grey |
| ADAMTS14   | grey |
| ADAMTS16   | grey |
| ADAMTS8    | grey |
| ADARB2     | grey |
| ADCY1      | grey |
| ADCY10     | grey |
| ADCY5      | grey |
| ADORA2B    | grey |
| ADRB1      | grey |
| AFAP1-AS1  | grey |
| AFAP1L1    | grey |
| AGAP11     | grey |
| AGAP4      | grey |
| AGAP8      | grey |
| AGAP9      | grey |
| AGPAT4     | grey |
| AGPHD1     | grey |
| AGRP       | grey |
| AHRR       | grey |
| AICDA      | grey |
| AIF1L      | grey |
| AIRE       | grey |
| AJAP1      | grey |
| AK7        | grey |
| AK8        | grey |
| AKAP2      | grey |
| AKR1C1     | grey |
| AKR1CL1    | grey |
| AKR1E2     | grey |
| AKR7A2P1   | grey |
| AKR7L      | grey |
| ALDH1A3    | grey |
| ALDH1L2    | grey |
| ALDOB      | grey |
| ALG1L      | grey |
| ALK        | grey |
| ALKBH1     | grey |
| ALMS1P     | grey |
| ALOX12B    | grey |
| ALOX12P2   | grey |
| ALOXE3     | grey |
| ALPK2      | grey |
| ALS2CR12   | grey |
| AMDHD1     | grey |
| ANGPT2     | grey |
| ANGPT4     | grey |
| ANGPTL2    | grey |
| ANKHD1     | grey |
| ANKRD18A   | grey |
| ANKRD19P   | grey |
| ANKRD20A9P | grey |
| ANKRD35    | grey |
| ANKRD53    | grey |
| ANKRD55    | grey |
| AOC4       | grey |
| APCDD1     | grey |
| APOA2      | grey |
| APOBEC3B   | grey |
| APOF       | grey |
| AQP7       | grey |
| ARHGAP11B  | grey |
| ARHGAP20   | grey |
| ARHGAP44   | grey |
| ARHGEF17   | grey |



|              |      |
|--------------|------|
| ARHGEF26-AS1 | grey |
| ARHGEF33     | grey |
| ARHGEF35     | grey |
| ARL5C        | grey |
| ARMC2        | grey |
| ARMC9        | grey |
| ARNT2        | grey |
| ARPP21       | grey |
| ARR3         | grey |
| ASB9         | grey |
| ASIP         | grey |
| ATOH8        | grey |
| ATP13A4      | grey |
| ATP1A2       | grey |
| ATP1A4       | grey |
| ATP1B1       | grey |
| ATP1B2       | grey |
| ATP5L2       | grey |
| ATP6AP1L     | grey |
| ATP6V1C2     | grey |
| ATP8B3       | grey |
| ATRNL1       | grey |
| AURKA        | grey |
| AURKB        | grey |
| AXL          | grey |
| B3GALNT2     | grey |
| B3GNT3       | grey |
| B3GNT4       | grey |
| B4GALNT3     | grey |
| B9D1         | grey |
| BAALC        | grey |
| BCAR1        | grey |
| BCAR3        | grey |
| BCL2L14      | grey |
| BCL2L2       | grey |
| BCL6B        | grey |
| BCRP3        | grey |
| BDAG1        | grey |
| BDNF         | grey |
| BEGAIN       | grey |
| BEND6        | grey |
| BFSP2        | grey |
| BHLHA15      | grey |
| BICC1        | grey |
| BIRC5        | grey |
| BIRC7        | grey |
| BMP3         | grey |
| BMP4         | grey |
| BPI          | grey |
| BREA2        | grey |
| BSPRY        | grey |
| BTBD17       | grey |
| BTBD8        | grey |
| BTG1         | grey |
| BTNL9        | grey |
| BVES         | grey |
| C10orf140    | grey |
| C10orf25     | grey |
| C10orf57     | grey |
| C10orf91     | grey |
| C10orf92     | grey |
| C11orf34     | grey |
| C11orf45     | grey |
| C11orf65     | grey |
| C11orf85     | grey |
| C12orf42     | grey |
| C12orf59     | grey |
| C12orf68     | grey |

|           |      |
|-----------|------|
| C12orf71  | grey |
| C12orf74  | grey |
| C13orf16  | grey |
| C14orf119 | grey |
| C14orf132 | grey |
| C14orf183 | grey |
| C14orf184 | grey |
| C14orf19  | grey |
| C14orf33  | grey |
| C14orf50  | grey |
| C14orf55  | grey |
| C14orf82  | grey |
| C15orf42  | grey |
| C15orf53  | grey |
| C15orf55  | grey |
| C15orf63  | grey |
| C16orf3   | grey |
| C16orf45  | grey |
| C16orf46  | grey |
| C16orf59  | grey |
| C16orf89  | grey |
| C16orf90  | grey |
| C17orf110 | grey |
| C17orf53  | grey |
| C17orf77  | grey |
| C17orf78  | grey |
| C17orf88  | grey |
| C19orf18  | grey |
| C1orf106  | grey |
| C1orf115  | grey |
| C1orf170  | grey |
| C1orf173  | grey |
| C1orf182  | grey |
| C1orf190  | grey |
| C1orf204  | grey |
| C1orf229  | grey |
| C1orf51   | grey |
| C1orf56   | grey |
| C1orf74   | grey |
| C1orf88   | grey |
| C1orf95   | grey |
| C1S       | grey |
| C20orf103 | grey |
| C20orf106 | grey |
| C20orf152 | grey |
| C20orf173 | grey |
| C20orf202 | grey |
| C20orf203 | grey |
| C20orf46  | grey |
| C20orf54  | grey |
| C21orf128 | grey |
| C21orf15  | grey |
| C21orf56  | grey |
| C21orf67  | grey |
| C21orf81  | grey |
| C21orf90  | grey |
| C22orf15  | grey |
| C22orf24  | grey |
| C2orf16   | grey |
| C2orf40   | grey |
| C2orf48   | grey |
| C2orf52   | grey |
| C2orf61   | grey |
| C3orf15   | grey |
| C3orf20   | grey |
| C3orf35   | grey |
| C3orf49   | grey |
| C3orf67   | grey |

|            |      |
|------------|------|
| C4BPA      | grey |
| C4orf26    | grey |
| C4orf36    | grey |
| C4orf49    | grey |
| C5orf27    | grey |
| C5orf58    | grey |
| C5orf64    | grey |
| C6orf124   | grey |
| C6orf132   | grey |
| C6orf138   | grey |
| C6orf163   | grey |
| C6orf164   | grey |
| C6orf174   | grey |
| C6orf201   | grey |
| C6orf81    | grey |
| C7orf10    | grey |
| C7orf16    | grey |
| C7orf28B   | grey |
| C7orf31    | grey |
| C8orf31    | grey |
| C8orf45    | grey |
| C8orf46    | grey |
| C8orf51    | grey |
| C9orf106   | grey |
| C9orf116   | grey |
| C9orf117   | grey |
| C9orf128   | grey |
| C9orf140   | grey |
| C9orf169   | grey |
| C9orf24    | grey |
| C9orf43    | grey |
| CABLES1    | grey |
| CABP7      | grey |
| CACHD1     | grey |
| CACNA1C    | grey |
| CACNA1D    | grey |
| CACNG4     | grey |
| CALHM1     | grey |
| CALN1      | grey |
| CAMK2N2    | grey |
| CAMKMT     | grey |
| CARD10     | grey |
| CASC1      | grey |
| CASQ1      | grey |
| CATSPER2P1 | grey |
| CATSPER3   | grey |
| CAV1       | grey |
| CCBP2      | grey |
| CCDC11     | grey |
| CCDC110    | grey |
| CCDC113    | grey |
| CCDC116    | grey |
| CCDC122    | grey |
| CCDC144A   | grey |
| CCDC144C   | grey |
| CCDC150    | grey |
| CCDC163P   | grey |
| CCDC37     | grey |
| CCDC40     | grey |
| CCDC42     | grey |
| CCDC62     | grey |
| CCDC81     | grey |
| CCL16      | grey |
| CCL20      | grey |
| CCL22      | grey |
| CCNB1      | grey |
| CCNB2      | grey |
| CCNB3      | grey |

|            |      |
|------------|------|
| CCNE1      | grey |
| CCNI2      | grey |
| CCR10      | grey |
| CCR3       | grey |
| CCR9       | grey |
| CCRL1      | grey |
| CD163L1    | grey |
| CD1B       | grey |
| CD1E       | grey |
| CD207      | grey |
| CD276      | grey |
| CD34       | grey |
| CD70       | grey |
| CD99P1     | grey |
| CDC20      | grey |
| CDC45      | grey |
| CDCA2      | grey |
| CDCA3      | grey |
| CDCA5      | grey |
| CDCP2      | grey |
| CDH3       | grey |
| CDH4       | grey |
| CDKN2B-AS1 | grey |
| CDO1       | grey |
| CDRT1      | grey |
| CDRT15     | grey |
| CDRT15P    | grey |
| CEACAM21   | grey |
| CEACAM22P  | grey |
| CEACAM6    | grey |
| CEACAM8    | grey |
| CECR2      | grey |
| CECR5-AS1  | grey |
| CECR7      | grey |
| CELF4      | grey |
| CELF5      | grey |
| CENPA      | grey |
| CENPBD1    | grey |
| CENPI      | grey |
| CENPP      | grey |
| CEP112     | grey |
| CERS3      | grey |
| CES3       | grey |
| CFB        | grey |
| CGREF1     | grey |
| CHAC1      | grey |
| CHDH       | grey |
| CHGB       | grey |
| CHI3L1     | grey |
| CHIT1      | grey |
| CHL1       | grey |
| CHN1       | grey |
| CHODL      | grey |
| CHRFAM7A   | grey |
| CHRM3      | grey |
| CHRNA6     | grey |
| CHRNA7     | grey |
| CHRNA9     | grey |
| CHRNE      | grey |
| CHRNG      | grey |
| CHST5      | grey |
| CHST6      | grey |
| CHST8      | grey |
| CHTOP      | grey |
| CIB3       | grey |
| CILP       | grey |
| CILP2      | grey |
| CKAP2L     | grey |

|          |      |
|----------|------|
| CKMT2    | grey |
| CLDN23   | grey |
| CLDN4    | grey |
| CLEC12B  | grey |
| CLEC18A  | grey |
| CLEC4F   | grey |
| CLGN     | grey |
| CLIC6    | grey |
| CLMP     | grey |
| CLNK     | grey |
| CMTM8    | grey |
| CMYA5    | grey |
| CNDP1    | grey |
| CNGA1    | grey |
| CNKSR3   | grey |
| CNNM1    | grey |
| CNRIP1   | grey |
| CNTD2    | grey |
| CNTN4    | grey |
| COBL     | grey |
| COL10A1  | grey |
| COL13A1  | grey |
| COL1A1   | grey |
| COL28A1  | grey |
| COL4A1   | grey |
| COL5A3   | grey |
| COL6A4P2 | grey |
| COL6A6   | grey |
| COL9A3   | grey |
| COPS3    | grey |
| CORIN    | grey |
| CORT     | grey |
| COX6B2   | grey |
| COX7A1   | grey |
| CPA5     | grey |
| CPEB1    | grey |
| CPLX2    | grey |
| CPLX3    | grey |
| CPNE9    | grey |
| CPS1     | grey |
| CPXM1    | grey |
| CRB1     | grey |
| CREB3L3  | grey |
| CREG2    | grey |
| CRHBP    | grey |
| CRHR2    | grey |
| CRISP3   | grey |
| CRLF1    | grey |
| CRLF2    | grey |
| CRMP1    | grey |
| CRX      | grey |
| CRYBA1   | grey |
| CRYGN    | grey |
| CRYM     | grey |
| CSDC2    | grey |
| CSMD1    | grey |
| CSPG4    | grey |
| CTAGE4   | grey |
| CTF1     | grey |
| CTH      | grey |
| CTHRC1   | grey |
| CTRC     | grey |
| CTSG     | grey |
| CTSK     | grey |
| CTSL2    | grey |
| CTTNBP2  | grey |
| CXCR4    | grey |
| CXorf36  | grey |

|              |      |
|--------------|------|
| CXorf58      | grey |
| CXorf65      | grey |
| CYB5R2       | grey |
| CYCSP52      | grey |
| CYGB         | grey |
| CYP17A1      | grey |
| CYP21A1P     | grey |
| CYP21A2      | grey |
| CYP24A1      | grey |
| CYP27B1      | grey |
| CYP2A6       | grey |
| CYP2B7P1     | grey |
| CYP2C8       | grey |
| CYP2F1       | grey |
| CYP2G1P      | grey |
| CYP2J2       | grey |
| CYP3A4       | grey |
| CYP3A5       | grey |
| CYP46A1      | grey |
| CYP4F2       | grey |
| CYP7B1       | grey |
| DAB1         | grey |
| DACT1        | grey |
| DACT3        | grey |
| DAZL         | grey |
| DBIL5P       | grey |
| DCDC5        | grey |
| DCHS2        | grey |
| DCST1        | grey |
| DCT          | grey |
| DDAH1        | grey |
| DDO          | grey |
| DDR2         | grey |
| DDX11L2      | grey |
| DDX39B       | grey |
| DEFA4        | grey |
| DEPDC4       | grey |
| DEPTOR       | grey |
| DES          | grey |
| DFNA5        | grey |
| DGCR10       | grey |
| DGCR9        | grey |
| DGKK         | grey |
| DIO1         | grey |
| DISP2        | grey |
| DKFZP434L187 | grey |
| DKK2         | grey |
| DLC1         | grey |
| DLG2         | grey |
| DLGAP1       | grey |
| DLL1         | grey |
| DLL4         | grey |
| DLX4         | grey |
| DMC1         | grey |
| DMD          | grey |
| DNAAF1       | grey |
| DNAH10       | grey |
| DNAH11       | grey |
| DNAH12       | grey |
| DNAH7        | grey |
| DNAH8        | grey |
| DNAJC12      | grey |
| DNAJC28      | grey |
| DNAJC6       | grey |
| DNALI1       | grey |
| DNASE1L3     | grey |
| DNM1P35      | grey |
| DNMT3L       | grey |

|           |      |
|-----------|------|
| DNTT      | grey |
| DOC2A     | grey |
| DPPA3     | grey |
| DPY19L1P1 | grey |
| DPY19L2   | grey |
| DPY19L2P1 | grey |
| DPYSL3    | grey |
| DPYSL4    | grey |
| DQX1      | grey |
| DRP2      | grey |
| DSC3      | grey |
| DSG2      | grey |
| DSP       | grey |
| DTNA      | grey |
| DUOX2     | grey |
| DUSP14    | grey |
| DUSP22    | grey |
| DUSP4     | grey |
| DUSP5     | grey |
| DZIP1L    | grey |
| E2F8      | grey |
| EBF3      | grey |
| EBI3      | grey |
| EBLN2     | grey |
| ECM1      | grey |
| ECM2      | grey |
| EDA       | grey |
| EDA2R     | grey |
| EDN1      | grey |
| EDN3      | grey |
| EFCAB10   | grey |
| EFCAB5    | grey |
| EFCAB6    | grey |
| EFHB      | grey |
| EFNA1     | grey |
| EFNB2     | grey |
| EFR3B     | grey |
| EGLN3     | grey |
| EGOT      | grey |
| EGR2      | grey |
| EHF       | grey |
| EIF3C     | grey |
| EIF5AL1   | grey |
| ELOVL2    | grey |
| EME1      | grey |
| EMID2     | grey |
| EMP1      | grey |
| ENAM      | grey |
| ENC1      | grey |
| ENO4      | grey |
| ENPEP     | grey |
| ENPP1     | grey |
| ENPP2     | grey |
| ENTHD1    | grey |
| ENTPD2    | grey |
| ENTPD3    | grey |
| EPB41L1   | grey |
| EPHA10    | grey |
| EPHX3     | grey |
| EPS8L1    | grey |
| EPX       | grey |
| ERAP2     | grey |
| ERCC6L    | grey |
| ERG       | grey |
| ERVFRD-1  | grey |
| ESPL1     | grey |
| ESPNP     | grey |
| ESRG      | grey |

|          |      |
|----------|------|
| ETV1     | grey |
| ETV4     | grey |
| ETV5     | grey |
| EVPL     | grey |
| EXO1     | grey |
| EYA2     | grey |
| EZH2     | grey |
| F10      | grey |
| F7       | grey |
| FA2H     | grey |
| FABP3    | grey |
| FAM2     | grey |
| FAM106CP | grey |
| FAM111B  | grey |
| FAM127C  | grey |
| FAM149A  | grey |
| FAM154B  | grey |
| FAM155B  | grey |
| FAM156A  | grey |
| FAM160A1 | grey |
| FAM164C  | grey |
| FAM166A  | grey |
| FAM167A  | grey |
| FAM171B  | grey |
| FAM172BP | grey |
| FAM174B  | grey |
| FAM181B  | grey |
| FAM182A  | grey |
| FAM183B  | grey |
| FAM186A  | grey |
| FAM189A1 | grey |
| FAM190A  | grey |
| FAM194A  | grey |
| FAM196A  | grey |
| FAM196B  | grey |
| FAM22A   | grey |
| FAM3B    | grey |
| FAM3D    | grey |
| FAM40B   | grey |
| FAM46B   | grey |
| FAM54A   | grey |
| FAM59A   | grey |
| FAM64A   | grey |
| FAM66A   | grey |
| FAM66B   | grey |
| FAM66D   | grey |
| FAM71E1  | grey |
| FAM72A   | grey |
| FAM78B   | grey |
| FAM81A   | grey |
| FAM83D   | grey |
| FAM86C1  | grey |
| FAM86C2P | grey |
| FAM86DP  | grey |
| FAM86FP  | grey |
| FAM90A1  | grey |
| FAM95B1  | grey |
| FARP1    | grey |
| FAT4     | grey |
| FBLIM1   | grey |
| FBLN5    | grey |
| FBN1     | grey |
| FBXL2    | grey |
| FBXL22   | grey |
| FBXO27   | grey |
| FERMT2   | grey |
| FGD5     | grey |
| FGF11    | grey |



|          |      |
|----------|------|
| FGF22    | grey |
| FGF5     | grey |
| FGFR2    | grey |
| FGFR3    | grey |
| FHAD1    | grey |
| FHIT     | grey |
| FIBCD1   | grey |
| FILIP1L  | grey |
| FKBP6    | grey |
| FKBP9L   | grey |
| FKSG29   | grey |
| FLG      | grey |
| FLJ11235 | grey |
| FLJ12825 | grey |
| FLJ26484 | grey |
| FLJ26850 | grey |
| FLJ32224 | grey |
| FLJ33360 | grey |
| FLJ35946 | grey |
| FLJ37035 | grey |
| FLJ39534 | grey |
| FLJ40852 | grey |
| FLJ41649 | grey |
| FLJ43681 | grey |
| FLJ44054 | grey |
| FLJ45079 | grey |
| FLJ45983 | grey |
| FLT1     | grey |
| FMN1     | grey |
| FMR1-AS1 | grey |
| FN1      | grey |
| FNDC7    | grey |
| FNDC8    | grey |
| FOLR3    | grey |
| FONG     | grey |
| FOSL1    | grey |
| FOXD1    | grey |
| FOXD2    | grey |
| FOXD4    | grey |
| FOXE1    | grey |
| FPR3     | grey |
| FREM1    | grey |
| FRG1B    | grey |
| FRMD6    | grey |
| FSCN3    | grey |
| FSD2     | grey |
| FSIP2    | grey |
| FST      | grey |
| FTCD     | grey |
| FUT10    | grey |
| FZD7     | grey |
| FZD8     | grey |
| GAB4     | grey |
| GAL3ST1  | grey |
| GALNT8   | grey |
| GAS1     | grey |
| GATA6    | grey |
| GCOM1    | grey |
| GDF10    | grey |
| GDF7     | grey |
| GEM      | grey |
| GGNBP1   | grey |
| GGT8P    | grey |
| GH1      | grey |
| GINS1    | grey |
| GINS2    | grey |
| GINS3    | grey |
| GJA3     | grey |

|            |      |
|------------|------|
| GJA9-MYCBP | grey |
| GJB6       | grey |
| GJC3       | grey |
| GLDC       | grey |
| GLI3       | grey |
| GLIPR1L2   | grey |
| GLIS3      | grey |
| GLP1R      | grey |
| GLT25D2    | grey |
| GNA14      | grey |
| GNAS-AS1   | grey |
| GNG3       | grey |
| GPC3       | grey |
| GPC4       | grey |
| GPFR       | grey |
| GPHA2      | grey |
| GPM6A      | grey |
| GPMMB      | grey |
| GPR113     | grey |
| GPR126     | grey |
| GPR137B    | grey |
| GPR142     | grey |
| GPR172B    | grey |
| GPR173     | grey |
| GPR179     | grey |
| GPR182     | grey |
| GPR3       | grey |
| GPR45      | grey |
| GPR52      | grey |
| GPR63      | grey |
| GPR83      | grey |
| GPR98      | grey |
| GPRC5B     | grey |
| GPRC5D     | grey |
| GRAPL      | grey |
| GREB1      | grey |
| GREB1L     | grey |
| GREM2      | grey |
| GRIK1      | grey |
| GRIK1-AS1  | grey |
| GRIK4      | grey |
| GRK4       | grey |
| GRK7       | grey |
| GRPR       | grey |
| GRTF1      | grey |
| GSDMA      | grey |
| GSG1       | grey |
| GSG2       | grey |
| GSTM1      | grey |
| GSTM5      | grey |
| GSTO2      | grey |
| GTF2H2     | grey |
| GTF2H2B    | grey |
| GTF2H2C    | grey |
| GTF2IRD1   | grey |
| GTSF1      | grey |
| GTSF1L     | grey |
| GUCY1B2    | grey |
| GYPE       | grey |
| H19        | grey |
| H1FNT      | grey |
| H2BFM      | grey |
| H2BFXP     | grey |
| HAP1       | grey |
| HARBI1     | grey |
| HAVCR2     | grey |
| HBEGF      | grey |
| HCG4B      | grey |

|           |      |
|-----------|------|
| HCG9      | grey |
| HCRT1     | grey |
| HEATR3    | grey |
| HEATR8    | grey |
| HERC2P3   | grey |
| HERC2P7   | grey |
| HEY2      | grey |
| HEYL      | grey |
| HFE2      | grey |
| HHIPL1    | grey |
| HHIPL2    | grey |
| HIGD1B    | grey |
| HILS1     | grey |
| HIPK4     | grey |
| HIST1H1D  | grey |
| HIST1H1E  | grey |
| HIST1H2AH | grey |
| HIST1H2AM | grey |
| HIST1H4C  | grey |
| HIST1H4E  | grey |
| HIST3H2BB | grey |
| HIST3H3   | grey |
| HJURP     | grey |
| HLA-DMB   | grey |
| HLA-DPB2  | grey |
| HLA-DQA1  | grey |
| HLA-DQA2  | grey |
| HLA-DQB1  | grey |
| HLA-DQB2  | grey |
| HLA-DRB5  | grey |
| HLA-DRB6  | grey |
| HLA-F-AS1 | grey |
| HLA-G     | grey |
| HLA-H     | grey |
| HLA-J     | grey |
| HLA-L     | grey |
| HMCN1     | grey |
| HMGB3     | grey |
| HMGN2     | grey |
| HMGN2P46  | grey |
| HNRNPC    | grey |
| HOXA1     | grey |
| HOXA10    | grey |
| HOXA2     | grey |
| HOXA3     | grey |
| HOXA4     | grey |
| HOXA5     | grey |
| HOXB3     | grey |
| HOXB4     | grey |
| HOXB7     | grey |
| HOXB9     | grey |
| HPDL      | grey |
| HPSE2     | grey |
| HRH1      | grey |
| HRNR      | grey |
| HS3ST3A1  | grey |
| HSD11B1   | grey |
| HSD11B2   | grey |
| HSD3BP4   | grey |
| HSF2BP    | grey |
| HSP90AB2P | grey |
| HSP90AB4P | grey |
| HSPA12B   | grey |
| HSPA2     | grey |
| HSPA7     | grey |
| HSPB6     | grey |
| HSPB9     | grey |
| HSPBAP1   | grey |

|               |      |
|---------------|------|
| HTR2B         | grey |
| HTR6          | grey |
| HTR7          | grey |
| HTRA1         | grey |
| HTRA4         | grey |
| HUNK          | grey |
| HYDIN         | grey |
| HYMAI         | grey |
| ICA1          | grey |
| IDO2          | grey |
| IFNK          | grey |
| IGDCC4        | grey |
| IGF1          | grey |
| IGFBP3        | grey |
| IGFL4         | grey |
| IGLL3P        | grey |
| IGLL5         | grey |
| IGSF10        | grey |
| IGSF11        | grey |
| IGSF22        | grey |
| IGSF3         | grey |
| IL11          | grey |
| IL17B         | grey |
| IL17RB        | grey |
| IL17RD        | grey |
| IL23R         | grey |
| IL36A         | grey |
| IL6           | grey |
| IL9R          | grey |
| ILDR1         | grey |
| ILDR2         | grey |
| INGX          | grey |
| INHBE         | grey |
| INMT          | grey |
| INPP1         | grey |
| INTS4L1       | grey |
| IQCA1         | grey |
| IQCD          | grey |
| IQCH          | grey |
| IQCK          | grey |
| IQGAP3        | grey |
| IQSEC3        | grey |
| IQUB          | grey |
| IRF6          | grey |
| ISM1          | grey |
| ITGA9         | grey |
| ITIH1         | grey |
| ITIH2         | grey |
| ITIH3         | grey |
| JAKMIP3       | grey |
| JAM2          | grey |
| JMJD7-PLA2G4B | grey |
| KBTBD10       | grey |
| KBTBD12       | grey |
| KBTBD4        | grey |
| KCNA7         | grey |
| KCNC1         | grey |
| KCNE2         | grey |
| KCNH1         | grey |
| KCNJ1         | grey |
| KCNJ10        | grey |
| KCNJ11        | grey |
| KCNK1         | grey |
| KCNK17        | grey |
| KCNK5         | grey |
| KCNMA1        | grey |
| KCNMB1        | grey |
| KCNN1         | grey |

|           |      |
|-----------|------|
| KCNN3     | grey |
| KCNQ3     | grey |
| KCP       | grey |
| KCTD19    | grey |
| KDELC1    | grey |
| KDM4D     | grey |
| KDM4DL    | grey |
| KGFLP1    | grey |
| KHDC1     | grey |
| KHDRBS3   | grey |
| KIAA0087  | grey |
| KIAA0895  | grey |
| KIAA0895L | grey |
| KIAA1217  | grey |
| KIAA1409  | grey |
| KIAA1456  | grey |
| KIAA1549  | grey |
| KIAA2022  | grey |
| KIF14     | grey |
| KIF17     | grey |
| KIF18B    | grey |
| KIF26A    | grey |
| KIF26B    | grey |
| KIF2C     | grey |
| KIF5A     | grey |
| KIF9      | grey |
| KIR2DL4   | grey |
| KIR2DS4   | grey |
| KIRREL2   | grey |
| KIRREL3   | grey |
| KIT       | grey |
| KLF15     | grey |
| KLHDC9    | grey |
| KLHL10    | grey |
| KLHL13    | grey |
| KLHL30    | grey |
| KLHL33    | grey |
| KLHL4     | grey |
| KLK1      | grey |
| KLK14     | grey |
| KNG1      | grey |
| KRT73     | grey |
| KRT74     | grey |
| KRT8      | grey |
| KRT80     | grey |
| KRT86     | grey |
| KRTAP5-9  | grey |
| L1TD1     | grey |
| L3MBTL4   | grey |
| LAMC3     | grey |
| LANCL3    | grey |
| LAYN      | grey |
| LBX2      | grey |
| LCA5      | grey |
| LCN12     | grey |
| LCN2      | grey |
| LCN8      | grey |
| LCT       | grey |
| LDB3      | grey |
| LDLRAD2   | grey |
| LEAP2     | grey |
| LENEP     | grey |
| LEP       | grey |
| LG12      | grey |
| LHFP      | grey |
| LHFPL1    | grey |
| LHFPL4    | grey |
| LIF       | grey |

|              |      |
|--------------|------|
| LILRA3       | grey |
| LIMCH1       | grey |
| LINGO2       | grey |
| LINGO4       | grey |
| LIPC         | grey |
| LIPH         | grey |
| LMAN1L       | grey |
| LMCD1        | grey |
| LOC100009676 | grey |
| LOC100101266 | grey |
| LOC100125556 | grey |
| LOC100128081 | grey |
| LOC100128164 | grey |
| LOC100128239 | grey |
| LOC100128338 | grey |
| LOC100128593 | grey |
| LOC100128640 | grey |
| LOC100128788 | grey |
| LOC100129046 | grey |
| LOC100129148 | grey |
| LOC100129269 | grey |
| LOC100129387 | grey |
| LOC100129534 | grey |
| LOC100129726 | grey |
| LOC100129858 | grey |
| LOC100130000 | grey |
| LOC100130015 | grey |
| LOC100130197 | grey |
| LOC100130348 | grey |
| LOC100130357 | grey |
| LOC100130451 | grey |
| LOC100130522 | grey |
| LOC100130894 | grey |
| LOC100130954 | grey |
| LOC100131060 | grey |
| LOC100131176 | grey |
| LOC100131691 | grey |
| LOC100132724 | grey |
| LOC100132781 | grey |
| LOC100132832 | grey |
| LOC100133612 | grey |
| LOC100134259 | grey |
| LOC100134868 | grey |
| LOC100170939 | grey |
| LOC100190938 | grey |
| LOC100192204 | grey |
| LOC100240735 | grey |
| LOC100268168 | grey |
| LOC100286979 | grey |
| LOC100288122 | grey |
| LOC100288778 | grey |
| LOC100288842 | grey |
| LOC100289187 | grey |
| LOC100289561 | grey |
| LOC100306975 | grey |
| LOC100335030 | grey |
| LOC100499467 | grey |
| LOC100505666 | grey |
| LOC100505676 | grey |
| LOC100505826 | grey |
| LOC100505894 | grey |
| LOC100506012 | grey |
| LOC100506071 | grey |
| LOC100506083 | grey |
| LOC100506134 | grey |
| LOC100506136 | grey |
| LOC100506305 | grey |
| LOC100506314 | grey |

|              |      |
|--------------|------|
| LOC100506388 | grey |
| LOC100506462 | grey |
| LOC100506497 | grey |
| LOC100506540 | grey |
| LOC100506599 | grey |
| LOC100506660 | grey |
| LOC100506668 | grey |
| LOC100506746 | grey |
| LOC100506874 | grey |
| LOC100507091 | grey |
| LOC100507127 | grey |
| LOC100507156 | grey |
| LOC100507246 | grey |
| LOC100507300 | grey |
| LOC100507341 | grey |
| LOC100507346 | grey |
| LOC100507421 | grey |
| LOC100507462 | grey |
| LOC143188    | grey |
| LOC144481    | grey |
| LOC144571    | grey |
| LOC148709    | grey |
| LOC149086    | grey |
| LOC149134    | grey |
| LOC151009    | grey |
| LOC151484    | grey |
| LOC151534    | grey |
| LOC154761    | grey |
| LOC154822    | grey |
| LOC220594    | grey |
| LOC220980    | grey |
| LOC253039    | grey |
| LOC283050    | grey |
| LOC283143    | grey |
| LOC283194    | grey |
| LOC283335    | grey |
| LOC283432    | grey |
| LOC283683    | grey |
| LOC284009    | grey |
| LOC284100    | grey |
| LOC284798    | grey |
| LOC285033    | grey |
| LOC285456    | grey |
| LOC285484    | grey |
| LOC285540    | grey |
| LOC285593    | grey |
| LOC285740    | grey |
| LOC285847    | grey |
| LOC286190    | grey |
| LOC286467    | grey |
| LOC338651    | grey |
| LOC338739    | grey |
| LOC338817    | grey |
| LOC339524    | grey |
| LOC339685    | grey |
| LOC339788    | grey |
| LOC339803    | grey |
| LOC339894    | grey |
| LOC340508    | grey |
| LOC348761    | grey |
| LOC348840    | grey |
| LOC386597    | grey |
| LOC387647    | grey |
| LOC388906    | grey |
| LOC388948    | grey |
| LOC389247    | grey |
| LOC389641    | grey |
| LOC390940    | grey |

|           |      |
|-----------|------|
| LOC391322 | grey |
| LOC399753 | grey |
| LOC400043 | grey |
| LOC400548 | grey |
| LOC400680 | grey |
| LOC400958 | grey |
| LOC401052 | grey |
| LOC401127 | grey |
| LOC401321 | grey |
| LOC440028 | grey |
| LOC440131 | grey |
| LOC440600 | grey |
| LOC441204 | grey |
| LOC441242 | grey |
| LOC441455 | grey |
| LOC441461 | grey |
| LOC441617 | grey |
| LOC441666 | grey |
| LOC441869 | grey |
| LOC442028 | grey |
| LOC442421 | grey |
| LOC442454 | grey |
| LOC553103 | grey |
| LOC554202 | grey |
| LOC641367 | grey |
| LOC642846 | grey |
| LOC643201 | grey |
| LOC643719 | grey |
| LOC644242 | grey |
| LOC644538 | grey |
| LOC646278 | grey |
| LOC646324 | grey |
| LOC646576 | grey |
| LOC646851 | grey |
| LOC646999 | grey |
| LOC647859 | grey |
| LOC648987 | grey |
| LOC650794 | grey |
| LOC653712 | grey |
| LOC654342 | grey |
| LOC654433 | grey |
| LOC727849 | grey |
| LOC728554 | grey |
| LOC728613 | grey |
| LOC728752 | grey |
| LOC728758 | grey |
| LOC728989 | grey |
| LOC729156 | grey |
| LOC729444 | grey |
| LOC729609 | grey |
| LOC729723 | grey |
| LOC729970 | grey |
| LOC730101 | grey |
| LOC730102 | grey |
| LOC730668 | grey |
| LOC731789 | grey |
| LOC84989  | grey |
| LOC91450  | grey |
| LOC91948  | grey |
| LONRF2    | grey |
| LOXL2     | grey |
| LOXL4     | grey |
| LPAR3     | grey |
| LPIN3     | grey |
| LPL       | grey |
| LRFN2     | grey |
| LRGUK     | grey |
| LRP11     | grey |



|          |      |
|----------|------|
| LRRC1    | grey |
| LRRC17   | grey |
| LRRC19   | grey |
| LRRC2    | grey |
| LRRC36   | grey |
| LRRC46   | grey |
| LRRC66   | grey |
| LRRC69   | grey |
| LRRC7    | grey |
| LRRC8E   | grey |
| LRRN4    | grey |
| LRRN4CL  | grey |
| LRRTM2   | grey |
| LRTOMT   | grey |
| LTA      | grey |
| LTF      | grey |
| LYPD5    | grey |
| MAB21L2  | grey |
| MACC1    | grey |
| MAFA     | grey |
| MAG      | grey |
| MALL     | grey |
| MAMDC2   | grey |
| MANSC4   | grey |
| MAOA     | grey |
| MAP1LC3C | grey |
| MAP3K15  | grey |
| MAPK12   | grey |
| MARCO    | grey |
| MARVELD2 | grey |
| MARVELD3 | grey |
| MATN1    | grey |
| MCF2L2   | grey |
| MCHR1    | grey |
| MCM10    | grey |
| MDGA1    | grey |
| ME1      | grey |
| MECOM    | grey |
| MED19    | grey |
| MED20    | grey |
| MEG3     | grey |
| MEIS3P1  | grey |
| MELK     | grey |
| MEOX1    | grey |
| MESTIT1  | grey |
| METTL20  | grey |
| METTL21B | grey |
| MEX3A    | grey |
| MFAP5    | grey |
| MGAT5B   | grey |
| MGC12916 | grey |
| MGC16025 | grey |
| MGC16142 | grey |
| MGC16275 | grey |
| MGC16703 | grey |
| MGC23270 | grey |
| MGC45922 | grey |
| MGP      | grey |
| MGST2    | grey |
| MIA      | grey |
| MICA     | grey |
| MID1     | grey |
| MIR497HG | grey |
| MKX      | grey |
| MMP19    | grey |
| MMP21    | grey |
| MMP8     | grey |
| MMRN2    | grey |

|              |      |
|--------------|------|
| MN1          | grey |
| MOCS1        | grey |
| MOG          | grey |
| MORN4        | grey |
| MOSC2        | grey |
| MPL          | grey |
| MPO          | grey |
| MPP3         | grey |
| MPPED2       | grey |
| MPV17L       | grey |
| MRAS         | grey |
| MRC1         | grey |
| MRGPRD       | grey |
| MRGPRE       | grey |
| MRRF         | grey |
| MS4A7        | grey |
| MSH4         | grey |
| MSH5         | grey |
| MSLN         | grey |
| MST1R        | grey |
| MSX2         | grey |
| MT3          | grey |
| MTRNR2L3     | grey |
| MTUS1        | grey |
| MTUS2        | grey |
| MUC12        | grey |
| MUC16        | grey |
| MUC4         | grey |
| MURC         | grey |
| MXRA7        | grey |
| MYBL2        | grey |
| MYBPH        | grey |
| MYCN         | grey |
| MYH15        | grey |
| MYO16        | grey |
| MYO18B       | grey |
| MYO1A        | grey |
| MYO1H        | grey |
| MYOM2        | grey |
| MYOT         | grey |
| MYOZ2        | grey |
| MYOZ3        | grey |
| MYRIP        | grey |
| MYT1         | grey |
| MYT1L        | grey |
| MZB1         | grey |
| NAT8         | grey |
| NAV2         | grey |
| NAV3         | grey |
| NBPF11       | grey |
| NBPF16       | grey |
| NBPF7        | grey |
| NBR2         | grey |
| NCKAP5       | grey |
| NCRNA00092   | grey |
| NCRNA00102   | grey |
| NCRNA00161   | grey |
| NCRNA00167   | grey |
| NCRNA00169   | grey |
| NCRNA00235   | grey |
| NCRNA00245   | grey |
| NCRNA00257   | grey |
| NCRNA00266-1 | grey |
| NCRNA00277   | grey |
| NCRNA00304   | grey |
| NCRNA00310   | grey |
| NCRNA00336   | grey |
| NCRNA00346   | grey |

|          |      |
|----------|------|
| NDRG4    | grey |
| NEBL     | grey |
| NEFL     | grey |
| NEFM     | grey |
| NEIL3    | grey |
| NEK10    | grey |
| NEK11    | grey |
| NEK2     | grey |
| NEK5     | grey |
| NEURL1B  | grey |
| NFATC4   | grey |
| NGFR     | grey |
| NHLRC1   | grey |
| NID2     | grey |
| NIM1     | grey |
| NIPAL1   | grey |
| NKX3-1   | grey |
| NLRP2    | grey |
| NLRP9    | grey |
| NMNAT3   | grey |
| NOS2     | grey |
| NOTCH2NL | grey |
| NOTCH4   | grey |
| NOX1     | grey |
| NPC1L1   | grey |
| NPHP1    | grey |
| NPIP     | grey |
| NPR3     | grey |
| NPTX1    | grey |
| NPTX2    | grey |
| NR1I2    | grey |
| NR1I3    | grey |
| NR4A2    | grey |
| NR5A1    | grey |
| NRIP3    | grey |
| NRN1L    | grey |
| NRP2     | grey |
| NT5C1B   | grey |
| NTN1     | grey |
| NTN4     | grey |
| NTNG1    | grey |
| NTRK2    | grey |
| NUDT10   | grey |
| NUDT19   | grey |
| NUDT6    | grey |
| NWD1     | grey |
| NXPH3    | grey |
| O3FAR1   | grey |
| OAZ3     | grey |
| OCLN     | grey |
| ODF3     | grey |
| ODZ4     | grey |
| OGN      | grey |
| OLFM1    | grey |
| OLFM4    | grey |
| OLFML1   | grey |
| OLR1     | grey |
| OMD      | grey |
| OPHN1    | grey |
| OR10AD1  | grey |
| OR10G2   | grey |
| OR13A1   | grey |
| OR2A7    | grey |
| OR2B11   | grey |
| OR2C1    | grey |
| OR2H2    | grey |
| OR2L13   | grey |
| OR4D1    | grey |

|          |      |
|----------|------|
| OR52K1   | grey |
| OR56B1   | grey |
| OR56B4   | grey |
| OR5K2    | grey |
| OR7D2    | grey |
| ORC1     | grey |
| ORC6     | grey |
| OSBPL6   | grey |
| OSCP1    | grey |
| OTUB2    | grey |
| OXA1L    | grey |
| OXCT2    | grey |
| OXTR     | grey |
| P2RX2    | grey |
| P2RY1    | grey |
| P2RY4    | grey |
| P2RY6    | grey |
| PACRG    | grey |
| PADI6    | grey |
| PAK3     | grey |
| PALLD    | grey |
| PALM     | grey |
| PAPL     | grey |
| PAPPA    | grey |
| PAQR5    | grey |
| PAR1     | grey |
| PARD3B   | grey |
| PAX8     | grey |
| PCDH11X  | grey |
| PCDH18   | grey |
| PCDHB9   | grey |
| PCDHGA10 | grey |
| PCDHGA11 | grey |
| PCDHGA12 | grey |
| PCDHGA5  | grey |
| PCDHGA6  | grey |
| PCDHGA7  | grey |
| PCDHGA9  | grey |
| PCDHGB2  | grey |
| PCDHGB3  | grey |
| PCDHGB4  | grey |
| PCDHGB5  | grey |
| PCDHGB6  | grey |
| PCGF3    | grey |
| PCOLCE2  | grey |
| PDC      | grey |
| PDE6A    | grey |
| PDE6C    | grey |
| PDE6D    | grey |
| PDE8B    | grey |
| PDGFB    | grey |
| PDZD9    | grey |
| PDZK1    | grey |
| PEG3     | grey |
| PERP     | grey |
| PEX5L    | grey |
| PFKFB1   | grey |
| PGAM4    | grey |
| PGBD3    | grey |
| PGBD5    | grey |
| PGF      | grey |
| PGM5     | grey |
| PGM5P2   | grey |
| PHACTR3  | grey |
| PHKA1    | grey |
| PHYHD1   | grey |
| PI4KAP1  | grey |
| PIGR     | grey |

|            |      |
|------------|------|
| PIGV       | grey |
| PIP5K1P1   | grey |
| PIPOX      | grey |
| PIPSL      | grey |
| PKD1L1     | grey |
| PKD1L3     | grey |
| PKD2L2     | grey |
| PKDCC      | grey |
| PKDREJ     | grey |
| PKMYT1     | grey |
| PKP2       | grey |
| PKP4       | grey |
| PLA2G10    | grey |
| PLA2G2D    | grey |
| PLA2G4B    | grey |
| PLA2G4C    | grey |
| PLAC2      | grey |
| PLAC9      | grey |
| PLCB4      | grey |
| PLCE1      | grey |
| PLCH1      | grey |
| PLEKHA8P1  | grey |
| PLEKHD1    | grey |
| PLEKHG4B   | grey |
| PLEKHH1    | grey |
| PLEKHN1    | grey |
| PLK1       | grey |
| PLK2       | grey |
| PLN        | grey |
| PLS3       | grey |
| PLTP       | grey |
| PM20D1     | grey |
| PMM2       | grey |
| PMS2P4     | grey |
| PNLDC1     | grey |
| PNMA2      | grey |
| PNMA5      | grey |
| PNMAL1     | grey |
| PNMAL2     | grey |
| PNPLA4     | grey |
| POF1B      | grey |
| POLE2      | grey |
| POLN       | grey |
| POLR2J2    | grey |
| POLR2J3    | grey |
| POM121L10P | grey |
| POM121L9P  | grey |
| POU3F1     | grey |
| POU4F1     | grey |
| POU5F2     | grey |
| PP2D1      | grey |
| PPAPDC3    | grey |
| PPARG      | grey |
| PPARGC1A   | grey |
| PPEF2      | grey |
| PPFIA4     | grey |
| PPIL6      | grey |
| PPM1E      | grey |
| PPP1R14C   | grey |
| PPP1R1B    | grey |
| PPP1R3G    | grey |
| PPP1R9A    | grey |
| PRB3       | grey |
| PRCD       | grey |
| PRDM11     | grey |
| PRDM16     | grey |
| PRELID2    | grey |
| PRG4       | grey |

|          |      |
|----------|------|
| PRH2     | grey |
| PRICKLE2 | grey |
| PRKAG3   | grey |
| PRKCDBP  | grey |
| PRKCG    | grey |
| PRKD1    | grey |
| PRKG2    | grey |
| PRKRIP1  | grey |
| PRL      | grey |
| PRODH    | grey |
| PROM1    | grey |
| PRR19    | grey |
| PRSS12   | grey |
| PRSS16   | grey |
| PRSS21   | grey |
| PRSS35   | grey |
| PRUNE2   | grey |
| PSD2     | grey |
| PSMB11   | grey |
| PSMC3IP  | grey |
| PSMG2    | grey |
| PSORS1C3 | grey |
| PSPH     | grey |
| PSPN     | grey |
| PTCD1    | grey |
| PTPN3    | grey |
| PTPRB    | grey |
| PTPRG    | grey |
| PTPRH    | grey |
| PTPRM    | grey |
| PTPRU    | grey |
| PXDN     | grey |
| PXDNL    | grey |
| PYCR1    | grey |
| PYY2     | grey |
| PZP      | grey |
| QRF1     | grey |
| RAB26    | grey |
| RAB38    | grey |
| RAB3A    | grey |
| RAB3B    | grey |
| RAB9A    | grey |
| RAD51    | grey |
| RAD54L   | grey |
| RAD9B    | grey |
| RAET1K   | grey |
| RAI2     | grey |
| RANBP17  | grey |
| RAP2B    | grey |
| RAPGEF3  | grey |
| RAPGEF4  | grey |
| RAPH1    | grey |
| RARB     | grey |
| RARRES1  | grey |
| RASAL1   | grey |
| RASAL2   | grey |
| RASD1    | grey |
| RASGRF1  | grey |
| RASIP1   | grey |
| RASL10B  | grey |
| RASL11B  | grey |
| RAVER2   | grey |
| RAX2     | grey |
| RCOR2    | grey |
| RDH12    | grey |
| RDM1     | grey |
| REEP1    | grey |
| REG4     | grey |

|           |      |
|-----------|------|
| REREP3    | grey |
| RFPL1-AS1 | grey |
| RFPL2     | grey |
| RFPL3-AS1 | grey |
| RFPL4A    | grey |
| RFX8      | grey |
| RGMA      | grey |
| RGPD1     | grey |
| RGPD2     | grey |
| RGPD3     | grey |
| RGS20     | grey |
| RGS7      | grey |
| RGS9BP    | grey |
| RHBDF1    | grey |
| RHBDL2    | grey |
| RHD       | grey |
| RHOXF1    | grey |
| RIBC1     | grey |
| RIBC2     | grey |
| RIMBP2    | grey |
| RIPK4     | grey |
| RLN3      | grey |
| RNASE1    | grey |
| RNASE6    | grey |
| RND1      | grey |
| RND2      | grey |
| RNF112    | grey |
| RNF138P1  | grey |
| RNF182    | grey |
| RNF207    | grey |
| RNF212    | grey |
| RNF32     | grey |
| RNF5      | grey |
| RNF5P1    | grey |
| ROBO1     | grey |
| ROCK1P1   | grey |
| ROR1      | grey |
| ROR2      | grey |
| RPA4      | grey |
| RPL13AP20 | grey |
| RPL13AP6  | grey |
| RPL19P12  | grey |
| RPL23AP7  | grey |
| RPS26     | grey |
| RPS6KA6   | grey |
| RPSAP58   | grey |
| RRAD      | grey |
| RRH       | grey |
| RRM2      | grey |
| RSPO4     | grey |
| RTN4RL1   | grey |
| RWDD2B    | grey |
| S100A1    | grey |
| S100B     | grey |
| SALL4     | grey |
| SAMD11    | grey |
| SAP18     | grey |
| SATB2     | grey |
| SCARA5    | grey |
| SCARNA15  | grey |
| SCARNA16  | grey |
| SCARNA21  | grey |
| SCARNA5   | grey |
| SCARNA6   | grey |
| SCARNA7   | grey |
| SCG3      | grey |
| SCG5      | grey |
| SCIN      | grey |

|              |      |
|--------------|------|
| SCN11A       | grey |
| SCN2A        | grey |
| SCN2B        | grey |
| SCN3B        | grey |
| SCN4B        | grey |
| SCN8A        | grey |
| SCNN1A       | grey |
| SCUBE2       | grey |
| SDC1         | grey |
| SDHAP2       | grey |
| SDK1         | grey |
| SDR16C5      | grey |
| SDS          | grey |
| SEBOX        | grey |
| SEC16B       | grey |
| SEC61A2      | grey |
| SEMASA       | grey |
| SENP3        | grey |
| SENP3-EIF4A1 | grey |
| SEPP1        | grey |
| SEPT7L       | grey |
| SERHL2       | grey |
| SERINC2      | grey |
| SERP2        | grey |
| SERPINE3     | grey |
| SETD3        | grey |
| SETD8        | grey |
| SEZ6L        | grey |
| SFRP1        | grey |
| SFRP4        | grey |
| SH2D4A       | grey |
| SH2D7        | grey |
| SH3D19       | grey |
| SH3GL1P2     | grey |
| SHANK3       | grey |
| SHC2         | grey |
| SHC3         | grey |
| SHD          | grey |
| SHISA9       | grey |
| SIAH3        | grey |
| SIGLEC11     | grey |
| SIGLEC12     | grey |
| SIGLEC15     | grey |
| SIX4         | grey |
| SKA1         | grey |
| SKA3         | grey |
| SLBP         | grey |
| SLC10A4      | grey |
| SLC10A5      | grey |
| SLC12A1      | grey |
| SLC12A8      | grey |
| SLC13A1      | grey |
| SLC13A3      | grey |
| SLC13A5      | grey |
| SLC14A2      | grey |
| SLC16A2      | grey |
| SLC16A8      | grey |
| SLC17A3      | grey |
| SLC17A7      | grey |
| SLC18A1      | grey |
| SLC1A1       | grey |
| SLC1A2       | grey |
| SLC22A13     | grey |
| SLC22A16     | grey |
| SLC22A20     | grey |
| SLC22A3      | grey |
| SLC22A5      | grey |
| SLC22A7      | grey |



|           |      |
|-----------|------|
| SLC23A1   | grey |
| SLC25A13  | grey |
| SLC25A18  | grey |
| SLC25A20  | grey |
| SLC25A41  | grey |
| SLC26A4   | grey |
| SLC26A5   | grey |
| SLC28A2   | grey |
| SLC28A3   | grey |
| SLC2A14   | grey |
| SLC34A1   | grey |
| SLC35F3   | grey |
| SLC35G3   | grey |
| SLC35G5   | grey |
| SLC38A11  | grey |
| SLC39A5   | grey |
| SLC3A1    | grey |
| SLC44A5   | grey |
| SLC45A1   | grey |
| SLC47A1   | grey |
| SLC47A2   | grey |
| SLC4A9    | grey |
| SLC5A10   | grey |
| SLC5A11   | grey |
| SLC6A13   | grey |
| SLC6A20   | grey |
| SLC7A3    | grey |
| SLC7A9    | grey |
| SLC9A2    | grey |
| SLC9A4    | grey |
| SLC04A1   | grey |
| SLC05A1   | grey |
| SLITRK5   | grey |
| SMAD1     | grey |
| SMAD5-AS1 | grey |
| SMCR5     | grey |
| SMO       | grey |
| SMOC1     | grey |
| SNAI1     | grey |
| SNORA16A  | grey |
| SNORA16B  | grey |
| SNORA18   | grey |
| SNORA21   | grey |
| SNORA27   | grey |
| SNORA29   | grey |
| SNORA2A   | grey |
| SNORA3    | grey |
| SNORA33   | grey |
| SNORA38   | grey |
| SNORA4    | grey |
| SNORA40   | grey |
| SNORA44   | grey |
| SNORA53   | grey |
| SNORA56   | grey |
| SNORA5A   | grey |
| SNORA5C   | grey |
| SNORA6    | grey |
| SNORA61   | grey |
| SNORA62   | grey |
| SNORA63   | grey |
| SNORA64   | grey |
| SNORA65   | grey |
| SNORA70G  | grey |
| SNORA71B  | grey |
| SNORA75   | grey |
| SNORA81   | grey |
| SNORA9    | grey |
| SNORD10   | grey |

|            |      |
|------------|------|
| SNORD94    | grey |
| SNORD97    | grey |
| SNX7       | grey |
| SORBS1     | grey |
| SORBS2     | grey |
| SORCS3     | grey |
| SOX15      | grey |
| SOX30      | grey |
| SOX5       | grey |
| SOX7       | grey |
| SP6        | grey |
| SP7        | grey |
| SPAG17     | grey |
| SPARCL1    | grey |
| SPATA18    | grey |
| SPATA21    | grey |
| SPATA9     | grey |
| SPC24      | grey |
| SPC25      | grey |
| SPDYE4     | grey |
| SPDYE7P    | grey |
| SPIRE1     | grey |
| SPOCK1     | grey |
| SPP1       | grey |
| SPRED3     | grey |
| SPSB1      | grey |
| SPTLC3     | grey |
| SPTSSB     | grey |
| SRD5A3     | grey |
| SRMS       | grey |
| SRPX       | grey |
| SRSF12     | grey |
| SSC5D      | grey |
| ST6GAL2    | grey |
| ST6GALNAC1 | grey |
| ST8SIA6    | grey |
| STAB2      | grey |
| STAC       | grey |
| STAC2      | grey |
| STARD13    | grey |
| STARD5     | grey |
| STEAP1B    | grey |
| STIL       | grey |
| STK31      | grey |
| STK33      | grey |
| STL        | grey |
| STOX1      | grey |
| STX19      | grey |
| SUGT1P1    | grey |
| SULT1C4    | grey |
| SULT2B1    | grey |
| SUMO4      | grey |
| SUSD5      | grey |
| SYCE1      | grey |
| SYCP2L     | grey |
| SYN3       | grey |
| SYNC       | grey |
| SYNM       | grey |
| SYNPO2     | grey |
| SYS1       | grey |
| SYT1       | grey |
| SYT3       | grey |
| SYTL5      | grey |
| TAC3       | grey |
| TACR2      | grey |
| TACSTD2    | grey |
| TANC1      | grey |
| TARM1      | grey |

|                  |      |
|------------------|------|
| TAS2R10          | grey |
| TAS2R13          | grey |
| TAS2R19          | grey |
| TAS2R31          | grey |
| TAS2R50          | grey |
| TAS2R60          | grey |
| TBC1D3P1-DHX40P1 | grey |
| TBX1             | grey |
| TCEAL2           | grey |
| TCP10L           | grey |
| TCTE1            | grey |
| TCTEX1D1         | grey |
| TDH              | grey |
| TDRD1            | grey |
| TEAD1            | grey |
| TECTA            | grey |
| TEK              | grey |
| TEKT2            | grey |
| TEKT3            | grey |
| TEKT4P2          | grey |
| TEKT5            | grey |
| TERT             | grey |
| TEX14            | grey |
| TF               | grey |
| TGFB2            | grey |
| THAP10           | grey |
| THEM5            | grey |
| THNSL2           | grey |
| THRB             | grey |
| THSD1            | grey |
| TIFAB            | grey |
| TIGD6            | grey |
| TIMP3            | grey |
| TLCD1            | grey |
| TLE6             | grey |
| TLN2             | grey |
| TLX2             | grey |
| TM4SF20          | grey |
| TMC2             | grey |
| TMC3             | grey |
| TMED6            | grey |
| TMED7-TICAM2     | grey |
| TMEM108          | grey |
| TMEM132C         | grey |
| TMEM133          | grey |
| TMEM136          | grey |
| TMEM139          | grey |
| TMEM150C         | grey |
| TMEM151B         | grey |
| TMEM159          | grey |
| TMEM163          | grey |
| TMEM17           | grey |
| TMEM171          | grey |
| TMEM176A         | grey |
| TMEM176B         | grey |
| TMEM178          | grey |
| TMEM200B         | grey |
| TMEM212          | grey |
| TMEM217          | grey |
| TMEM231          | grey |
| TMEM236          | grey |
| TMEM37           | grey |
| TMEM45A          | grey |
| TMEM45B          | grey |
| TMEM69           | grey |
| TMEM81           | grey |
| TMPRSS3          | grey |
| TMTC1            | grey |

|           |      |
|-----------|------|
| TNFRSF13B | grey |
| TNFRSF19  | grey |
| TNFSF11   | grey |
| TNFSF9    | grey |
| TNIP3     | grey |
| TNR       | grey |
| TOB2P1    | grey |
| TOMM20L   | grey |
| TP53TG5   | grey |
| TPBG      | grey |
| TPD52L1   | grey |
| TPSAB1    | grey |
| TREM2     | grey |
| TREML4    | grey |
| TRIM36    | grey |
| TRIM45    | grey |
| TRIP13    | grey |
| TRNP1     | grey |
| TRO       | grey |
| TROAP     | grey |
| TRPC5     | grey |
| TRPC6     | grey |
| TRPM8     | grey |
| TRPV3     | grey |
| TSHR      | grey |
| TSKS      | grey |
| TSNAXIP1  | grey |
| TSPAN1    | grey |
| TSPAN10   | grey |
| TSPAN15   | grey |
| TSPY26P   | grey |
| TSPYL6    | grey |
| TTC23     | grey |
| TTC39A    | grey |
| TTC8      | grey |
| TTLL10    | grey |
| TTLL11    | grey |
| TTLL13    | grey |
| TTLL2     | grey |
| TTLL7     | grey |
| TUBA3E    | grey |
| TUBA4B    | grey |
| TUBB3     | grey |
| TUBBP5    | grey |
| TULP2     | grey |
| TUSC5     | grey |
| TXNDC2    | grey |
| TYMS      | grey |
| TYRO3     | grey |
| TYRO3P    | grey |
| TYW1B     | grey |
| UBE2D4    | grey |
| UBE2E2    | grey |
| UBQLNL    | grey |
| UBXN10    | grey |
| UCHL1     | grey |
| ULBP2     | grey |
| ULBP3     | grey |
| ULK4      | grey |
| UMODL1    | grey |
| UNC13A    | grey |
| UPB1      | grey |
| UPK1A     | grey |
| UPK1B     | grey |
| UQCRHL    | grey |
| USP2      | grey |
| USP43     | grey |
| USP49     | grey |

|              |      |
|--------------|------|
| UTS2D        | grey |
| VCAM1        | grey |
| VLDLR        | grey |
| VN1R1        | grey |
| VN1R2        | grey |
| VPS37D       | grey |
| VSIG10L      | grey |
| VSIG4        | grey |
| VSNL1        | grey |
| VSTM2L       | grey |
| VSTM4        | grey |
| VTN          | grey |
| VWA5B2       | grey |
| VWDE         | grey |
| WASF1        | grey |
| WASH1        | grey |
| WASH5P       | grey |
| WBP2NL       | grey |
| WDR31        | grey |
| WDR49        | grey |
| WDR63        | grey |
| WDR64        | grey |
| WDR66        | grey |
| WDR88        | grey |
| WDR96        | grey |
| WEE2         | grey |
| WNK4         | grey |
| WNT16        | grey |
| WNT2B        | grey |
| WNT3         | grey |
| WNT4         | grey |
| WNT5B        | grey |
| WNT7B        | grey |
| WNT8B        | grey |
| WSCD2        | grey |
| WTIP         | grey |
| WWC1         | grey |
| WWOX         | grey |
| WWTR1        | grey |
| XCR1         | grey |
| XG           | grey |
| XKR3         | grey |
| XKR9         | grey |
| XRCC2        | grey |
| YBX2         | grey |
| YY2          | grey |
| ZBTB20-AS1   | grey |
| ZBTB32       | grey |
| ZBTB49       | grey |
| ZBTB7C       | grey |
| ZBTB8A       | grey |
| ZC3HAV1L     | grey |
| ZCCHC12      | grey |
| ZDHHC15      | grey |
| ZFP112       | grey |
| ZFP57        | grey |
| ZHX1-C8ORF76 | grey |
| ZMAT4        | grey |
| ZNF114       | grey |
| ZNF132       | grey |
| ZNF155       | grey |
| ZNF311       | grey |
| ZNF321P      | grey |
| ZNF334       | grey |
| ZNF389       | grey |
| ZNF425       | grey |
| ZNF433       | grey |
| ZNF462       | grey |

|           |           |
|-----------|-----------|
| ZNF474    | grey      |
| ZNF521    | grey      |
| ZNF556    | grey      |
| ZNF704    | grey      |
| ZNF726    | grey      |
| ZNF727    | grey      |
| ZNF774    | grey      |
| ZNF79     | grey      |
| ZNF826P   | grey      |
| ZNF843    | grey      |
| ZNRF3     | grey      |
| ZBPB2     | grey      |
| ZSCAN12P1 | grey      |
| ZSCAN23   | grey      |
| ZSWIM3    | grey      |
| ZWINT     | grey      |
| ZYG11A    | grey      |
| ABO       | grey60    |
| ABTB2     | grey60    |
| ACOT11    | grey60    |
| ADORA3    | grey60    |
| ALOX15    | grey60    |
| ASB2      | grey60    |
| ASRGL1    | grey60    |
| BACE2     | grey60    |
| CACNG6    | grey60    |
| CAT       | grey60    |
| CCL23     | grey60    |
| CEBPE     | grey60    |
| CYP4F12   | grey60    |
| CYSLTR2   | grey60    |
| EMR4P     | grey60    |
| EPN2      | grey60    |
| FAM124B   | grey60    |
| GPR44     | grey60    |
| HRASLS5   | grey60    |
| IDO1      | grey60    |
| IL1RL1    | grey60    |
| IL34      | grey60    |
| IL5RA     | grey60    |
| KCTD15    | grey60    |
| LGALS12   | grey60    |
| MGAT3     | grey60    |
| OLIG1     | grey60    |
| OLIG2     | grey60    |
| P2RY2     | grey60    |
| PIK3R6    | grey60    |
| PMP22     | grey60    |
| PRSS33    | grey60    |
| PRSS41    | grey60    |
| SEMA7A    | grey60    |
| SIGLEC8   | grey60    |
| SLC29A1   | grey60    |
| SMPD3     | grey60    |
| SORD      | grey60    |
| SPNS3     | grey60    |
| SRGAP3    | grey60    |
| TEC       | grey60    |
| THBS4     | grey60    |
| VSTM1     | grey60    |
| ZBTB42    | grey60    |
| AGRN      | lightcyan |
| BST2      | lightcyan |
| CCL2      | lightcyan |
| CMPK2     | lightcyan |
| CTSL1     | lightcyan |
| DDX58     | lightcyan |
| DDX60     | lightcyan |

|              |            |
|--------------|------------|
| DDX60L       | lightcyan  |
| DHX58        | lightcyan  |
| EIF2AK2      | lightcyan  |
| EIF3L        | lightcyan  |
| EPST1        | lightcyan  |
| EXOC3L1      | lightcyan  |
| FBXO39       | lightcyan  |
| FLJ42418     | lightcyan  |
| HERC5        | lightcyan  |
| HERC6        | lightcyan  |
| IFI44        | lightcyan  |
| IFI44L       | lightcyan  |
| IFI6         | lightcyan  |
| IFIH1        | lightcyan  |
| IFIT1        | lightcyan  |
| IFIT2        | lightcyan  |
| IFIT3        | lightcyan  |
| IFIT5        | lightcyan  |
| IFITM3       | lightcyan  |
| IRF7         | lightcyan  |
| ISG15        | lightcyan  |
| KLHDC7B      | lightcyan  |
| LAMP3        | lightcyan  |
| LILRB5       | lightcyan  |
| LOC100133669 | lightcyan  |
| LY6E         | lightcyan  |
| MT2A         | lightcyan  |
| MX1          | lightcyan  |
| NCRNA00256A  | lightcyan  |
| OAS1         | lightcyan  |
| OAS2         | lightcyan  |
| OAS3         | lightcyan  |
| OASL         | lightcyan  |
| ODF3B        | lightcyan  |
| OTOF         | lightcyan  |
| PARP12       | lightcyan  |
| PHF11        | lightcyan  |
| PLSCR1       | lightcyan  |
| PNPT1        | lightcyan  |
| RSAD2        | lightcyan  |
| RSPH9        | lightcyan  |
| RTP4         | lightcyan  |
| RUFY4        | lightcyan  |
| SAMD4A       | lightcyan  |
| SAMD9L       | lightcyan  |
| SIGLEC1      | lightcyan  |
| SPATS2L      | lightcyan  |
| TDRD7        | lightcyan  |
| TOR1B        | lightcyan  |
| TRIM22       | lightcyan  |
| TRIM69       | lightcyan  |
| USP18        | lightcyan  |
| XAF1         | lightcyan  |
| ZBP1         | lightcyan  |
| ZCCHC2       | lightcyan  |
| ADRB2        | lightgreen |
| C12orf75     | lightgreen |
| C17orf54     | lightgreen |
| CD226        | lightgreen |
| DSG3         | lightgreen |
| ELOVL6       | lightgreen |
| ENPP4        | lightgreen |
| ENPP5        | lightgreen |
| EPHB4        | lightgreen |
| ESM1         | lightgreen |
| FAM108C1     | lightgreen |
| FAM70A       | lightgreen |
| GZMA         | lightgreen |

|              |               |
|--------------|---------------|
| GZMK         | lightgreen    |
| HOPX         | lightgreen    |
| ID2          | lightgreen    |
| IFNG         | lightgreen    |
| KATNAL1      | lightgreen    |
| KIF21A       | lightgreen    |
| KLRB1        | lightgreen    |
| KLRC1        | lightgreen    |
| KLRC2        | lightgreen    |
| KLRC3        | lightgreen    |
| KLRC4        | lightgreen    |
| KLRF1        | lightgreen    |
| KLRK1        | lightgreen    |
| LOC387895    | lightgreen    |
| LPAL2        | lightgreen    |
| MYBL1        | lightgreen    |
| MYO6         | lightgreen    |
| PDGFD        | lightgreen    |
| PHLDA1       | lightgreen    |
| PHLDB2       | lightgreen    |
| SLC4A4       | lightgreen    |
| STYK1        | lightgreen    |
| TGFBR3       | lightgreen    |
| TLR3         | lightgreen    |
| TMEM22       | lightgreen    |
| XCL1         | lightgreen    |
| XCL2         | lightgreen    |
| ZNF365       | lightgreen    |
| ZNF600       | lightgreen    |
| AKAP12       | lightyellow   |
| C10orf82     | lightyellow   |
| C1orf150     | lightyellow   |
| C1orf186     | lightyellow   |
| CA8          | lightyellow   |
| CCNA1        | lightyellow   |
| CPA3         | lightyellow   |
| CTNNA2       | lightyellow   |
| CYP11A1      | lightyellow   |
| ENPP3        | lightyellow   |
| EPAS1        | lightyellow   |
| GATA2        | lightyellow   |
| HDC          | lightyellow   |
| HPGDS        | lightyellow   |
| HRH4         | lightyellow   |
| ITGB8        | lightyellow   |
| KLHDC7A      | lightyellow   |
| KRT81        | lightyellow   |
| LOC100130899 | lightyellow   |
| LOC201477    | lightyellow   |
| LOC399940    | lightyellow   |
| LOC728084    | lightyellow   |
| LOC81691     | lightyellow   |
| MS4A2        | lightyellow   |
| NTRK1        | lightyellow   |
| PRSS3        | lightyellow   |
| PTGER3       | lightyellow   |
| SLC27A2      | lightyellow   |
| SLC2A10      | lightyellow   |
| SLC45A3      | lightyellow   |
| TEX101       | lightyellow   |
| THSD7A       | lightyellow   |
| TRIM64B      | lightyellow   |
|              | 3-Mar magenta |
| ABCB4        | magenta       |
| ADAM28       | magenta       |
| ADARB1       | magenta       |
| ADD2         | magenta       |
| AFF3         | magenta       |



|          |         |
|----------|---------|
| AHNAK2   | magenta |
| AKAP6    | magenta |
| BANK1    | magenta |
| BCL11A   | magenta |
| BCL7A    | magenta |
| BLK      | magenta |
| BLNK     | magenta |
| C11orf80 | magenta |
| C1orf220 | magenta |
| CABYR    | magenta |
| CBLN3    | magenta |
| CCDC165  | magenta |
| CCR6     | magenta |
| CD180    | magenta |
| CD19     | magenta |
| CD200    | magenta |
| CD22     | magenta |
| CD24     | magenta |
| CD40     | magenta |
| CD72     | magenta |
| CD79A    | magenta |
| CD79B    | magenta |
| CD83     | magenta |
| CDCA7L   | magenta |
| CDHR3    | magenta |
| CELSR1   | magenta |
| CLEC17A  | magenta |
| CNR2     | magenta |
| CNTNAP2  | magenta |
| COBLL1   | magenta |
| COCH     | magenta |
| COL19A1  | magenta |
| COL4A3   | magenta |
| COL4A4   | magenta |
| CORO2B   | magenta |
| CR2      | magenta |
| CTGF     | magenta |
| CXCR5    | magenta |
| DBNDD1   | magenta |
| DENND5B  | magenta |
| DIRAS1   | magenta |
| DPF3     | magenta |
| DTX1     | magenta |
| E2F5     | magenta |
| EBF1     | magenta |
| EGR3     | magenta |
| EML6     | magenta |
| ENAH     | magenta |
| EVC2     | magenta |
| FAM129C  | magenta |
| FAM177B  | magenta |
| FARP2    | magenta |
| FBXO10   | magenta |
| FCER2    | magenta |
| FCRL1    | magenta |
| FCRL2    | magenta |
| FCRL3    | magenta |
| FCRL5    | magenta |
| FCRLA    | magenta |
| FLJ41484 | magenta |
| GGA2     | magenta |
| GHRL     | magenta |
| GNG7     | magenta |
| GYLTL1B  | magenta |
| HLA-DOA  | magenta |
| HLA-DOB  | magenta |
| HS3ST1   | magenta |
| HTR3A    | magenta |

|               |         |
|---------------|---------|
| ICOSLG        | magenta |
| IL28RA        | magenta |
| IRF4          | magenta |
| KCNG1         | magenta |
| KCNH8         | magenta |
| KCNIP2        | magenta |
| KIAA0125      | magenta |
| KLF8          | magenta |
| KLHL14        | magenta |
| L1CAM         | magenta |
| LAMA5         | magenta |
| LAMC1         | magenta |
| LARGE         | magenta |
| LCN10         | magenta |
| LIX1          | magenta |
| LOC100506178  | magenta |
| LOC100506930  | magenta |
| LOC100507043  | magenta |
| LOC254099     | magenta |
| LOC283663     | magenta |
| LOC284749     | magenta |
| LOC375196     | magenta |
| LOC96610      | magenta |
| MACROD2       | magenta |
| MAP2          | magenta |
| MGC39372      | magenta |
| MICAL3        | magenta |
| MMP11         | magenta |
| MOBKLB        | magenta |
| MOXD1         | magenta |
| MRPL42P5      | magenta |
| MS4A1         | magenta |
| MYBPC2        | magenta |
| NCRNA00287    | magenta |
| NEK8          | magenta |
| NETO1         | magenta |
| NIPAL4        | magenta |
| NXPH4         | magenta |
| OLFML2A       | magenta |
| OSBPL10       | magenta |
| P2RX5         | magenta |
| P2RX5-TAX1BP3 | magenta |
| PARM1         | magenta |
| PAWR          | magenta |
| PAX5          | magenta |
| PCDH9         | magenta |
| PEG10         | magenta |
| PHACTR1       | magenta |
| PIK3C2B       | magenta |
| PKIG          | magenta |
| PLEKHG1       | magenta |
| PMEPA1        | magenta |
| PNOC          | magenta |
| POU2AF1       | magenta |
| PPAPDC1B      | magenta |
| PRICKLE1      | magenta |
| PTPRK         | magenta |
| QRSL1         | magenta |
| QSOX2         | magenta |
| RAPGEF5       | magenta |
| RASGRP3       | magenta |
| RUNDC2C       | magenta |
| SCN4A         | magenta |
| SEL1L3        | magenta |
| SEMA3G        | magenta |
| SETBP1        | magenta |
| SIGLEC6       | magenta |
| SLC15A2       | magenta |

|              |              |
|--------------|--------------|
| SLC2A5       | magenta      |
| SLC5A9       | magenta      |
| SLC9A7       | magenta      |
| SNX22        | magenta      |
| SOBP         | magenta      |
| SPIB         | magenta      |
| SPRY1        | magenta      |
| STAG3        | magenta      |
| STAP1        | magenta      |
| STRBP        | magenta      |
| SWAP70       | magenta      |
| SYBU         | magenta      |
| SYNPO        | magenta      |
| TCF4         | magenta      |
| TCL1A        | magenta      |
| TCL1B        | magenta      |
| TCL6         | magenta      |
| TNFRSF13C    | magenta      |
| TPSB2        | magenta      |
| TSPAN13      | magenta      |
| TSPAN3       | magenta      |
| VPREB3       | magenta      |
| ZNF418       | magenta      |
| ZNF532       | magenta      |
| ZNF860       | magenta      |
| 8-Sep        | midnightblue |
| ADAM1        | midnightblue |
| ADAT2        | midnightblue |
| ATF7IP2      | midnightblue |
| C16orf7      | midnightblue |
| C19orf38     | midnightblue |
| C5orf63      | midnightblue |
| CA5B         | midnightblue |
| CAPRIN2      | midnightblue |
| CARS2        | midnightblue |
| CNST         | midnightblue |
| DDX5         | midnightblue |
| FES          | midnightblue |
| FXC1         | midnightblue |
| GADD45B      | midnightblue |
| GATC         | midnightblue |
| GBGT1        | midnightblue |
| GGT1         | midnightblue |
| GOLGA8A      | midnightblue |
| HAUS4        | midnightblue |
| HK3          | midnightblue |
| HNRPDL       | midnightblue |
| ICA1L        | midnightblue |
| KCTD7        | midnightblue |
| LOC100506776 | midnightblue |
| MFSD7        | midnightblue |
| MOAP1        | midnightblue |
| MRPS25       | midnightblue |
| MTERFD2      | midnightblue |
| NARF         | midnightblue |
| NR3C2        | midnightblue |
| OFD1         | midnightblue |
| OSBPL3       | midnightblue |
| PAIP2B       | midnightblue |
| PER3         | midnightblue |
| PIGG         | midnightblue |
| PIGL         | midnightblue |
| PTCD3        | midnightblue |
| RIC3         | midnightblue |
| S100PBP      | midnightblue |
| S1PR1        | midnightblue |
| SCML4        | midnightblue |
| SEC22C       | midnightblue |

|         |              |
|---------|--------------|
| SEMA6B  | midnightblue |
| SEPT7P2 | midnightblue |
| SERTAD3 | midnightblue |
| SLC11A2 | midnightblue |
| SRSF1   | midnightblue |
| STAT4   | midnightblue |
| SUN1    | midnightblue |
| TARBP1  | midnightblue |
| TBRG1   | midnightblue |
| THSD1P1 | midnightblue |
| TRAF5   | midnightblue |
| TSEN2   | midnightblue |
| UPF3A   | midnightblue |
| WDR75   | midnightblue |
| ZBTB24  | midnightblue |
| ZFP28   | midnightblue |
| ZMYND15 | midnightblue |
| ZNF234  | midnightblue |
| ZNF251  | midnightblue |
| ZNF331  | midnightblue |
| ZNF514  | midnightblue |
| ZNF528  | midnightblue |
| ZNF548  | midnightblue |
| ZNF585B | midnightblue |
| ZNF831  | midnightblue |
| ZNF841  | midnightblue |
| ZNF850  | midnightblue |
| ZNF880  | midnightblue |

2-Mar pink

|           |      |
|-----------|------|
| A4GALT    | pink |
| ABCC13    | pink |
| ABCC4     | pink |
| ABCG2     | pink |
| ACHE      | pink |
| ADIPOR1   | pink |
| AHSP      | pink |
| ALAS2     | pink |
| ANK1      | pink |
| AQP1      | pink |
| ARHGEF37  | pink |
| BAG1      | pink |
| BAMBI     | pink |
| BCAM      | pink |
| BCL2L1    | pink |
| BEST2     | pink |
| BLVRB     | pink |
| BPGM      | pink |
| C14orf45  | pink |
| C17orf99  | pink |
| C18orf10  | pink |
| C19orf51  | pink |
| C19orf69  | pink |
| C19orf77  | pink |
| C1orf116  | pink |
| C20orf108 | pink |
| C2orf66   | pink |
| C5orf4    | pink |
| C6orf147  | pink |
| C6orf154  | pink |
| C7orf29   | pink |
| C9orf3    | pink |
| C9orf78   | pink |
| CA1       | pink |
| CDC34     | pink |
| CHPT1     | pink |
| CLRN1-AS1 | pink |
| CNN1      | pink |
| CR1L      | pink |

|           |      |
|-----------|------|
| CSDA      | pink |
| CTSE      | pink |
| DARC      | pink |
| DCAF12    | pink |
| DCAF6     | pink |
| DDX11L9   | pink |
| DNMBP-AS1 | pink |
| DPCD      | pink |
| DPM2      | pink |
| DYRK3     | pink |
| E2F2      | pink |
| ECSIT     | pink |
| EHD2      | pink |
| EMID1     | pink |
| EPB42     | pink |
| EPB49     | pink |
| ESPN      | pink |
| FAM104A   | pink |
| FAM107A   | pink |
| FAM46C    | pink |
| FAM65C    | pink |
| FAM83A    | pink |
| FBXO17    | pink |
| FBXO7     | pink |
| FBXO9     | pink |
| FECH      | pink |
| FHL2      | pink |
| FKBP1B    | pink |
| FKBP8     | pink |
| FTL       | pink |
| GALNT5    | pink |
| GATA1     | pink |
| GCAT      | pink |
| GFAP      | pink |
| GLRX5     | pink |
| GMPR      | pink |
| GPR146    | pink |
| GPX1      | pink |
| GSPT1     | pink |
| GUK1      | pink |
| GYP A     | pink |
| GYPB      | pink |
| GYP C     | pink |
| HAGH      | pink |
| HBA1      | pink |
| HBA2      | pink |
| HBB       | pink |
| HBD       | pink |
| HBG1      | pink |
| HBG2      | pink |
| HBM       | pink |
| HBQ1      | pink |
| HBZ       | pink |
| HEMGN     | pink |
| HEPACAM2  | pink |
| HERC2P4   | pink |
| HIST1H2AI | pink |
| HIST1H3B  | pink |
| HMBS      | pink |
| HPS1      | pink |
| HSD17B7P2 | pink |
| IFI27     | pink |
| IFIT1B    | pink |
| IGF2BP2   | pink |
| ITLN1     | pink |
| KANK2     | pink |
| KCNH2     | pink |
| KEL       | pink |

|              |      |
|--------------|------|
| KLC3         | pink |
| KLF1         | pink |
| KLHDC8A      | pink |
| KRT1         | pink |
| KRT79        | pink |
| LGALS3       | pink |
| LOC100132163 | pink |
| LOC100134229 | pink |
| LOC100505536 | pink |
| LOC388588    | pink |
| LOC401109    | pink |
| LY75-CD302   | pink |
| LYL1         | pink |
| MBNL3        | pink |
| MEF2B        | pink |
| MFSD2B       | pink |
| MKRN1        | pink |
| MRC2         | pink |
| MT1L         | pink |
| MXI1         | pink |
| MYL4         | pink |
| NEDD4L       | pink |
| NFIX         | pink |
| NPRL3        | pink |
| NT5M         | pink |
| NUDT4        | pink |
| OAZ1         | pink |
| ODC1         | pink |
| OR2W3        | pink |
| OSBP2        | pink |
| PAGE2B       | pink |
| PAQR9        | pink |
| PBX1         | pink |
| PDE3A        | pink |
| PDZK1IP1     | pink |
| PITHD1       | pink |
| PLEK2        | pink |
| PLVAP        | pink |
| POLL         | pink |
| POLR1D       | pink |
| PPM1A        | pink |
| PRDX5        | pink |
| PRDX6        | pink |
| PTPRF        | pink |
| PTPRN        | pink |
| RAB3IL1      | pink |
| RAG1         | pink |
| RAP1GAP      | pink |
| RBM38        | pink |
| RHAG         | pink |
| RHCE         | pink |
| RHOV         | pink |
| RILP         | pink |
| RIOK3        | pink |
| RNF10        | pink |
| RPL3L        | pink |
| RUNDC3A      | pink |
| SEC14L4      | pink |
| SELENBP1     | pink |
| SESN3        | pink |
| SFRP2        | pink |
| SGIP1        | pink |
| SHARPIN      | pink |
| SHISA4       | pink |
| SHISA7       | pink |
| SIAH2        | pink |
| SIM2         | pink |
| SLC14A1      | pink |

|            |        |
|------------|--------|
| SLC25A37   | pink   |
| SLC25A39   | pink   |
| SLC2A4     | pink   |
| SLC38A5    | pink   |
| SLC4A1     | pink   |
| SLC6A19    | pink   |
| SLC6A8     | pink   |
| SLC6A9     | pink   |
| SNCA       | pink   |
| SNORA66    | pink   |
| SOX6       | pink   |
| SPDYC      | pink   |
| SPTA1      | pink   |
| SRRD       | pink   |
| ST6GALNAC4 | pink   |
| STRADB     | pink   |
| STX2       | pink   |
| TAL1       | pink   |
| TESC       | pink   |
| TFDP1      | pink   |
| TGM2       | pink   |
| TMC5       | pink   |
| TMCC2      | pink   |
| TMEM111    | pink   |
| TMEM158    | pink   |
| TMEM56     | pink   |
| TMEM98     | pink   |
| TMOD1      | pink   |
| TMPRSS9    | pink   |
| TNS1       | pink   |
| TRIM10     | pink   |
| TRIM50     | pink   |
| TRIM58     | pink   |
| TSPAN5     | pink   |
| TSPAN7     | pink   |
| TSP02      | pink   |
| TSTA3      | pink   |
| TTC25      | pink   |
| TUBB2A     | pink   |
| TUBB2B     | pink   |
| UBA52      | pink   |
| UBB        | pink   |
| UBXN6      | pink   |
| UTS2R      | pink   |
| VIPR2      | pink   |
| VT11B      | pink   |
| VWCE       | pink   |
| WDR45      | pink   |
| WNT9A      | pink   |
| XK         | pink   |
| YBX1       | pink   |
| YPEL4      | pink   |
| ABCC3      | purple |
| ABLIM3     | purple |
| ACRBP      | purple |
| ACSBG1     | purple |
| ADRA2A     | purple |
| ALOX12     | purple |
| AQP10      | purple |
| ARHGAP6    | purple |
| ARMC3      | purple |
| ASAP2      | purple |
| AVPR1A     | purple |
| BEND2      | purple |
| BET3L      | purple |
| BMP6       | purple |
| C10orf47   | purple |
| C15orf26   | purple |

|              |        |
|--------------|--------|
| C15orf54     | purple |
| C21orf7      | purple |
| C2orf88      | purple |
| C6orf145     | purple |
| C6orf25      | purple |
| C7orf41      | purple |
| C8orf42      | purple |
| CA2          | purple |
| CABP5        | purple |
| CALD1        | purple |
| CAV2         | purple |
| CCDC3        | purple |
| CD9          | purple |
| CDK2AP1      | purple |
| CDKN1A       | purple |
| CDR2L        | purple |
| CLDN5        | purple |
| CLEC1B       | purple |
| CLEC2L       | purple |
| CLU          | purple |
| CMTM5        | purple |
| CTDSPL       | purple |
| CTTN         | purple |
| CXCL5        | purple |
| CXCR2P1      | purple |
| DNM3         | purple |
| EGF          | purple |
| ELOVL7       | purple |
| ENDOD1       | purple |
| ENKUR        | purple |
| ESAM         | purple |
| F2RL3        | purple |
| FAM26E       | purple |
| FLJ44511     | purple |
| FSTL1        | purple |
| FSTL4        | purple |
| GF1B         | purple |
| GNAZ         | purple |
| GNG11        | purple |
| GP6          | purple |
| GP9          | purple |
| GRB14        | purple |
| GRK5         | purple |
| GUCY1A3      | purple |
| GUCY1B3      | purple |
| HIST1H2AG    | purple |
| HIST1H2BG    | purple |
| HIST1H2BH    | purple |
| HIST1H2BJ    | purple |
| HOMER2       | purple |
| HRASLS       | purple |
| ITGA2B       | purple |
| ITGB3        | purple |
| ITGB5        | purple |
| KCND3        | purple |
| KIAA1211     | purple |
| LOC100287036 | purple |
| LOC100506035 | purple |
| LOC100506343 | purple |
| LOC151174    | purple |
| LOC283089    | purple |
| LTBP1        | purple |
| LY6G6E       | purple |
| LY6G6F       | purple |
| MAOB         | purple |
| MAP1B        | purple |
| MEIS1        | purple |
| MFAP3L       | purple |



|           |        |
|-----------|--------|
| MGLL      | purple |
| MMD       | purple |
| MMRN1     | purple |
| MYL9      | purple |
| MYLK      | purple |
| NAT8B     | purple |
| NRGN      | purple |
| PARD3     | purple |
| PCSK6     | purple |
| PCYT1B    | purple |
| PDE5A     | purple |
| PDGFA     | purple |
| PDGFRA    | purple |
| PDLIM1    | purple |
| PEAR1     | purple |
| PF4       | purple |
| PF4V1     | purple |
| PGRMC1    | purple |
| PKHD1L1   | purple |
| PLOD2     | purple |
| PLXNB3    | purple |
| PPBP      | purple |
| PRKAR2B   | purple |
| PROS1     | purple |
| psiTPTE22 | purple |
| PTCRA     | purple |
| PTGES     | purple |
| PTGS1     | purple |
| PVALB     | purple |
| RAB6B     | purple |
| RBPMS2    | purple |
| RGS6      | purple |
| RHOBTB1   | purple |
| SAMD14    | purple |
| SDC4      | purple |
| SDPR      | purple |
| SEC14L5   | purple |
| SELP      | purple |
| SERPINE1  | purple |
| SH3BGRL2  | purple |
| SH3TC2    | purple |
| SLC24A3   | purple |
| SLC35D3   | purple |
| SLC6A4    | purple |
| SLC8A3    | purple |
| SMOX      | purple |
| SPARC     | purple |
| SPOCD1    | purple |
| ST7       | purple |
| STON2     | purple |
| SYTL4     | purple |
| TFPI      | purple |
| TGFB1I1   | purple |
| TMEM40    | purple |
| TNFSF4    | purple |
| TOM1L1    | purple |
| TPM1      | purple |
| TREML1    | purple |
| TRIM40    | purple |
| TSC22D1   | purple |
| TSPAN33   | purple |
| TSPAN9    | purple |
| TTC18     | purple |
| TTC7B     | purple |
| TUBA8     | purple |
| TUBB1     | purple |
| VEGFC     | purple |
| VEPH1     | purple |

|           |        |
|-----------|--------|
| VIL1      | purple |
| VSIG2     | purple |
| VWF       | purple |
| WASF3     | purple |
| ZNF492    | purple |
| A2LD1     | red    |
| ABHD12B   | red    |
| ACPP      | red    |
| ACSL1     | red    |
| ACTR2     | red    |
| ADAM17    | red    |
| ADAMTSL5  | red    |
| ADM       | red    |
| AGFG1     | red    |
| AGPAT9    | red    |
| AGTPBP1   | red    |
| AHCTF1    | red    |
| AKR7A3    | red    |
| ALDH1A2   | red    |
| ALOX5     | red    |
| ALOX5AP   | red    |
| ANKRD6    | red    |
| ANTXR2    | red    |
| ANXA3     | red    |
| AP3B2     | red    |
| APAF1     | red    |
| APBB2     | red    |
| APH1B     | red    |
| APOA1BP   | red    |
| APOBEC3A  | red    |
| AQP9      | red    |
| ARHGAP19  | red    |
| ARHGEF19  | red    |
| ARL11     | red    |
| ARL4D     | red    |
| ARMCX6    | red    |
| ARPC5     | red    |
| ARPC5L    | red    |
| ARSB      | red    |
| ASAP1     | red    |
| ASTN2     | red    |
| ATF6      | red    |
| ATP11A    | red    |
| ATP2C2    | red    |
| ATP5G1    | red    |
| ATP6V1A   | red    |
| ATP7B     | red    |
| ATP9A     | red    |
| ATXN1     | red    |
| ATXN7     | red    |
| AVIL      | red    |
| AVL9      | red    |
| BCL2L11   | red    |
| BEND5     | red    |
| BEND7     | red    |
| BEST1     | red    |
| BMX       | red    |
| BOD1L     | red    |
| BRWD3     | red    |
| BST1      | red    |
| C10orf116 | red    |
| C10orf46  | red    |
| C15orf50  | red    |
| C17orf81  | red    |
| C19orf59  | red    |
| C1orf98   | red    |
| C21orf59  | red    |
| C22orf46  | red    |

|            |     |
|------------|-----|
| C3AR1      | red |
| C3orf75    | red |
| C5orf32    | red |
| C7orf34    | red |
| C7orf53    | red |
| C7orf71    | red |
| C9orf152   | red |
| C9orf68    | red |
| CA4        | red |
| CACNA1E    | red |
| CAPN12     | red |
| CAPN13     | red |
| CAPN8      | red |
| CASP4      | red |
| CASP5      | red |
| CBS        | red |
| CCDC125    | red |
| CCDC147    | red |
| CCDC64B    | red |
| CCNI       | red |
| CCNJL      | red |
| CCR1       | red |
| CCR2       | red |
| CCT4       | red |
| CD177      | red |
| CD300LD    | red |
| CD55       | red |
| CD59       | red |
| CDA        | red |
| CDC123     | red |
| CDC42EP3   | red |
| CDH2       | red |
| CDK14      | red |
| CDK19      | red |
| CDK4       | red |
| CDKL5      | red |
| CEACAM3    | red |
| CEACAM4    | red |
| CENPV      | red |
| CEP63      | red |
| CHRNA10    | red |
| CIR1       | red |
| CLDN6      | red |
| CLEC1A     | red |
| CLMN       | red |
| CNGA4      | red |
| CNTNAP3    | red |
| COMMD7     | red |
| COQ4       | red |
| CR1        | red |
| CSRNP1     | red |
| CST7       | red |
| CTBP2      | red |
| CUL3       | red |
| CWC25      | red |
| CXCR1      | red |
| CYBB       | red |
| CYP1B1-AS1 | red |
| CYTH4      | red |
| DCTPP1     | red |
| DGAT2      | red |
| DHRS12     | red |
| DHRS13     | red |
| DHRS7      | red |
| DHRSX      | red |
| DISC2      | red |
| DLEU2      | red |
| DMRTC2     | red |

|           |     |
|-----------|-----|
| DMXL2     | red |
| DNAH14    | red |
| DNAJB11   | red |
| DNAJC3    | red |
| DOCK1     | red |
| DOCK4     | red |
| DOK4      | red |
| DPYD      | red |
| DUSP13    | red |
| E2F3      | red |
| EBP       | red |
| ECHDC3    | red |
| EDEM2     | red |
| EFCAB2    | red |
| EIF2C4    | red |
| ELMOD3    | red |
| ELOVL5    | red |
| EMR3      | red |
| ENO3      | red |
| ENTPD1    | red |
| ETS2      | red |
| EVI5      | red |
| EXT1      | red |
| F5        | red |
| F8A1      | red |
| FAM120A   | red |
| FAM157B   | red |
| FAM169B   | red |
| FAM49A    | red |
| FAM65B    | red |
| FCGR1A    | red |
| FCGR1B    | red |
| FCGR1C    | red |
| FCGR2A    | red |
| FCGR3B    | red |
| FFAR2     | red |
| FFAR3     | red |
| FGF13     | red |
| FLI1      | red |
| FLI10661  | red |
| FLJ39051  | red |
| FLOT1     | red |
| FOXO3     | red |
| FPR1      | red |
| FPR2      | red |
| FRMD4B    | red |
| FRY       | red |
| FYB       | red |
| GABARAPL1 | red |
| GALNT14   | red |
| GBE1      | red |
| GCM1      | red |
| GDE1      | red |
| GIMAP1    | red |
| GLIPR2    | red |
| GLT1D1    | red |
| GMPR2     | red |
| GNAQ      | red |
| GOLGA7B   | red |
| GPR141    | red |
| GPR17     | red |
| GPR84     | red |
| GPR89A    | red |
| GPR97     | red |
| GPSM2     | red |
| GRIP2     | red |
| GSDMC     | red |
| GSK3B     | red |

|              |     |
|--------------|-----|
| GTSE1        | red |
| H3F3B        | red |
| HAL          | red |
| HAS1         | red |
| HCAR2        | red |
| HCAR3        | red |
| HCG27        | red |
| HEY1         | red |
| HIF1A        | red |
| HIST1H1T     | red |
| HIST1H2BE    | red |
| HIST1H4D     | red |
| HIVEP1       | red |
| HMGCR        | red |
| HP           | red |
| HPSE         | red |
| HSPA6        | red |
| IDH1         | red |
| IDS          | red |
| IFNAR1       | red |
| IFNGR2       | red |
| IGSF6        | red |
| IL10RB       | red |
| IL13RA1      | red |
| IL18RAP      | red |
| IL1B         | red |
| IL1R1        | red |
| IL1R2        | red |
| IL1RN        | red |
| IMP3         | red |
| INHBB        | red |
| INPP5A       | red |
| INSC         | red |
| IQGAP1       | red |
| IRAK3        | red |
| ITGAD        | red |
| ITM2B        | red |
| ITPRIP       | red |
| JHDM1D       | red |
| JMJD1C       | red |
| KAL1         | red |
| KAZN         | red |
| KCNE1        | red |
| KCNH7        | red |
| KCNJ15       | red |
| KCNS1        | red |
| KDM1B        | red |
| KIAA0232     | red |
| KIAA0319     | red |
| KIAA1257     | red |
| KIAA1539     | red |
| KLF6         | red |
| KPNA1        | red |
| KPNA4        | red |
| KRT23        | red |
| LAMP2        | red |
| LBR          | red |
| LILRA6       | red |
| LILRB3       | red |
| LIMD1        | red |
| LITAF        | red |
| LMNB1        | red |
| LMO4         | red |
| LOC100124692 | red |
| LOC100131289 | red |
| LOC100233209 | red |
| LOC100288432 | red |
| LOC100289178 | red |

|              |     |
|--------------|-----|
| LOC100505702 | red |
| LOC100506229 | red |
| LOC100507404 | red |
| LOC149837    | red |
| LOC151475    | red |
| LOC284751    | red |
| LOC285084    | red |
| LOC285696    | red |
| LOC338799    | red |
| LOC399715    | red |
| LOC401233    | red |
| LOC440461    | red |
| LOC731424    | red |
| LRG1         | red |
| LRRC4        | red |
| LRRC6        | red |
| LRRFIP1      | red |
| LYN          | red |
| LYVE1        | red |
| MAK          | red |
| MANSC1       | red |
| MARCKS       | red |
| MBOAT2       | red |
| MCMBP        | red |
| MCTP2        | red |
| ME2          | red |
| MEGF9        | red |
| MLLT11       | red |
| MME          | red |
| MPZL3        | red |
| MRPL9        | red |
| MRV1         | red |
| MSL1         | red |
| MTMR10       | red |
| MXD1         | red |
| MYO10        | red |
| MYO5A        | red |
| MZT2A        | red |
| NAIP         | red |
| NCF4         | red |
| NCOA1        | red |
| NCOA2        | red |
| NCRNA00173   | red |
| NECAB2       | red |
| NEDD9        | red |
| NFE2         | red |
| NFE2L2       | red |
| NFIL3        | red |
| NFYA         | red |
| NHP2L1       | red |
| NLN          | red |
| NMNAT2       | red |
| NPEPPS       | red |
| NPL          | red |
| NPTN         | red |
| NQO2         | red |
| NR6A1        | red |
| NRADDP       | red |
| NRBF2        | red |
| NRD1         | red |
| NSUN7        | red |
| NT5C2        | red |
| NUDT5        | red |
| NUP50        | red |
| NUPL1        | red |
| OLAH         | red |
| OPLAH        | red |
| ORM1         | red |

|         |     |
|---------|-----|
| ORM2    | red |
| OSBPL11 | red |
| OSBPL1A | red |
| OSGEP   | red |
| OSM     | red |
| OTX1    | red |
| OXER1   | red |
| PAK2    | red |
| PANK2   | red |
| PAPSS2  | red |
| PCBP4   | red |
| PCNX    | red |
| PDCD2L  | red |
| PDCD7   | red |
| PDE4B   | red |
| PK3     | red |
| PDRG1   | red |
| PDZD3   | red |
| PDZD8   | red |
| PELI2   | red |
| PELO    | red |
| PFKFB4  | red |
| PGLYRP1 | red |
| PGS1    | red |
| PHB     | red |
| PHC2    | red |
| PIAS1   | red |
| PICALM  | red |
| PIF1    | red |
| PLAU    | red |
| PLB1    | red |
| PLBD1   | red |
| PLD1    | red |
| PLIN5   | red |
| PLXDC2  | red |
| PLXNC1  | red |
| PNP     | red |
| PNPLA1  | red |
| POLD3   | red |
| PPAP2B  | red |
| PPP1R3B | red |
| PPP3CC  | red |
| PPP3R1  | red |
| PPP3R2  | red |
| PPP4R1  | red |
| PROK2   | red |
| PRR11   | red |
| PRRG4   | red |
| PRUNE   | red |
| PTPRE   | red |
| PVRL2   | red |
| QPCT    | red |
| RAB1A   | red |
| RAB27A  | red |
| RAB31   | red |
| RANBP1  | red |
| RAPGEF2 | red |
| RASGRP4 | red |
| RASSF3  | red |
| REPS2   | red |
| RHOH    | red |
| RMND5A  | red |
| RNF111  | red |
| RNF130  | red |
| RNF145  | red |
| RNF149  | red |
| RNF19B  | red |
| ROD1    | red |

|            |     |
|------------|-----|
| ROPN1L     | red |
| RPL32P3    | red |
| RS1        | red |
| RTN3       | red |
| S100A11    | red |
| SAMD15     | red |
| SBF2       | red |
| SBNO2      | red |
| SCARF1     | red |
| SCARNA3    | red |
| SDCBP      | red |
| SDHAP3     | red |
| SEC24D     | red |
| SECTM1     | red |
| SERPINB1   | red |
| SH3GLB1    | red |
| SHROOM4    | red |
| SIRPD      | red |
| SIT1       | red |
| SLC12A6    | red |
| SLC15A4    | red |
| SLC22A1    | red |
| SLC22A14   | red |
| SLC22A4    | red |
| SLC26A8    | red |
| SLC2A11    | red |
| SLC45A4    | red |
| SLC8A1     | red |
| SMAGP      | red |
| SNAP23     | red |
| SNORD89    | red |
| SNTA1      | red |
| SNTG2      | red |
| SOCS3      | red |
| SOD2       | red |
| SOS2       | red |
| SPATC1     | red |
| SPIN2B     | red |
| SQRDL      | red |
| SRPK1      | red |
| SRPK2      | red |
| ST3GAL4    | red |
| ST3GAL5    | red |
| ST6GALNAC2 | red |
| STK3       | red |
| STX11      | red |
| STX12      | red |
| STX3       | red |
| STX6       | red |
| SURF2      | red |
| SUSD3      | red |
| SYN2       | red |
| SYNGR3     | red |
| TARBP2     | red |
| TBC1D30    | red |
| TCF19      | red |
| TCP11L2    | red |
| TDRD9      | red |
| TEAD3      | red |
| TEX264     | red |
| TG         | red |
| TGM3       | red |
| TIAM2      | red |
| TIMM44     | red |
| TLE4       | red |
| TLR2       | red |
| TLR4       | red |
| TLR5       | red |



|           |        |
|-----------|--------|
| TM9SF2    | red    |
| TMCC1     | red    |
| TMCC3     | red    |
| TMCO3     | red    |
| TMEM132D  | red    |
| TMEM154   | red    |
| TMLHE     | red    |
| TMX4      | red    |
| TNFRSF1A  | red    |
| TNFSF14   | red    |
| TOR1AIP2  | red    |
| TPX2      | red    |
| TREM1     | red    |
| TREML2    | red    |
| TRIB1     | red    |
| TRIM9     | red    |
| TRPM6     | red    |
| TRPV5     | red    |
| TSEN54    | red    |
| TSHZ3     | red    |
| TSPAN16   | red    |
| UBE2R2    | red    |
| UBR2      | red    |
| UHRF1BP1L | red    |
| UIMC1     | red    |
| UNQ6494   | red    |
| URM1      | red    |
| USP3      | red    |
| USP32     | red    |
| VAMP3     | red    |
| VPS8      | red    |
| VSIG10    | red    |
| WAC       | red    |
| WDFY3     | red    |
| WDR26     | red    |
| WIPF1     | red    |
| WLS       | red    |
| WNT10B    | red    |
| YIPF1     | red    |
| ZAK       | red    |
| ZCCHC18   | red    |
| ZDHHC19   | red    |
| ZFP36     | red    |
| ZFP36L1   | red    |
| ZNF143    | red    |
| ZNF200    | red    |
| ZNF217    | red    |
| ZNF259    | red    |
| ZNF438    | red    |
| ZNF552    | red    |
| ZNF578    | red    |
| ZNF608    | red    |
| ZSWIM6    | red    |
| ARPC1A    | salmon |
| ATP6V1E2  | salmon |
| BLVRA     | salmon |
| BTF3      | salmon |
| BUD31     | salmon |
| C11orf67  | salmon |
| C14orf43  | salmon |
| C20orf107 | salmon |
| C4orf27   | salmon |
| C6orf203  | salmon |
| C9orf156  | salmon |
| CACYBP    | salmon |
| CCDC56    | salmon |
| CCDC77    | salmon |
| CETN2     | salmon |

|              |        |
|--------------|--------|
| CHKB         | salmon |
| CHKB-CPT1B   | salmon |
| COMMD1       | salmon |
| CWF19L1      | salmon |
| CXorf26      | salmon |
| DIABLO       | salmon |
| EBNA1BP2     | salmon |
| EIF3H        | salmon |
| EIF3M        | salmon |
| FAU          | salmon |
| GSTM3        | salmon |
| GTF3C6       | salmon |
| HDHD1        | salmon |
| HMG1         | salmon |
| HNRNPA1      | salmon |
| HS3ST3B1     | salmon |
| ICT1         | salmon |
| IL20RB       | salmon |
| ISY1         | salmon |
| ITGB1BP1     | salmon |
| LOC100505783 | salmon |
| LOC400927    | salmon |
| MDH1         | salmon |
| MED10        | salmon |
| MRPS16       | salmon |
| MRPS7        | salmon |
| MYEOV2       | salmon |
| MYL12A       | salmon |
| MYL5         | salmon |
| NACA         | salmon |
| NAP1L1       | salmon |
| NBPF10       | salmon |
| NDUFC2       | salmon |
| NOP16        | salmon |
| NPM1         | salmon |
| PARL         | salmon |
| PCNA         | salmon |
| PDCL3        | salmon |
| PER2         | salmon |
| PLAC8L1      | salmon |
| POLR2H       | salmon |
| POMP         | salmon |
| POP4         | salmon |
| PPIA         | salmon |
| PRDX1        | salmon |
| PSMA5        | salmon |
| PSMB6        | salmon |
| RAN          | salmon |
| RANGRF       | salmon |
| RARRES3      | salmon |
| RPIA         | salmon |
| RPL10        | salmon |
| RPL10A       | salmon |
| RPL12        | salmon |
| RPL13A       | salmon |
| RPL14        | salmon |
| RPL19        | salmon |
| RPL22        | salmon |
| RPL23A       | salmon |
| RPL24        | salmon |
| RPL27A       | salmon |
| RPL3         | salmon |
| RPL32        | salmon |
| RPL35A       | salmon |
| RPL36        | salmon |
| RPL37        | salmon |
| RPL37A       | salmon |
| RPL4         | salmon |

|          |        |
|----------|--------|
| RPL5     | salmon |
| RPL7A    | salmon |
| RPS11    | salmon |
| RPS12    | salmon |
| RPS13    | salmon |
| RPS14    | salmon |
| RPS16    | salmon |
| RPS18    | salmon |
| RPS19    | salmon |
| RPS20    | salmon |
| RPS21    | salmon |
| RPS23    | salmon |
| RPS25    | salmon |
| RPS27A   | salmon |
| RPS3     | salmon |
| RPS4X    | salmon |
| RPS5     | salmon |
| RPS6     | salmon |
| RPS8     | salmon |
| RPSA     | salmon |
| SKP1     | salmon |
| SNHG6    | salmon |
| SNRPD2   | salmon |
| SNRPD3   | salmon |
| SNUPN    | salmon |
| SPAG7    | salmon |
| SRPRB    | salmon |
| SSBP1    | salmon |
| STX8     | salmon |
| SUCLG1   | salmon |
| SUGT1    | salmon |
| THYN1    | salmon |
| TICAM2   | salmon |
| TOMM6    | salmon |
| TRAPP3   | salmon |
| TRNAU1AP | salmon |
| UBAC2    | salmon |
| UQCRCF1  | salmon |
| USP42    | salmon |
| UXT      | salmon |
| VDAC3    | salmon |
| ZGLP1    | salmon |
| ZMYND17  | salmon |
| ZNRD1    | salmon |
| AARSD1   | tan    |
| ABCD4    | tan    |
| ACTR5    | tan    |
| AEN      | tan    |
| AKIRIN2  | tan    |
| ALDH8A1  | tan    |
| AP3M2    | tan    |
| AP4B1    | tan    |
| ARMCX2   | tan    |
| ASNS     | tan    |
| ATG16L1  | tan    |
| ATP1A1OS | tan    |
| BPHL     | tan    |
| C10orf58 | tan    |
| C12orf65 | tan    |
| C15orf17 | tan    |
| C17orf67 | tan    |
| C17orf75 | tan    |
| C2orf89  | tan    |
| C3orf18  | tan    |
| C8orf33  | tan    |
| CARKD    | tan    |
| CCDC84   | tan    |
| CD302    | tan    |

|              |     |
|--------------|-----|
| CDK20        | tan |
| CDK5RAP1     | tan |
| CIAPIN1      | tan |
| CLYBL        | tan |
| CNPY4        | tan |
| COQ10A       | tan |
| COQ6         | tan |
| CRIP3        | tan |
| CXCL16       | tan |
| DEM1         | tan |
| DEPDC7       | tan |
| DFNB59       | tan |
| DNAH3        | tan |
| DNAJC9       | tan |
| DPH2         | tan |
| DSN1         | tan |
| DUSP6        | tan |
| EXOSC2       | tan |
| EXOSC7       | tan |
| FAM86B1      | tan |
| FAM86HP      | tan |
| FANCE        | tan |
| FGR          | tan |
| FLJ42351     | tan |
| GALNT12      | tan |
| GCET2        | tan |
| GEMIN8       | tan |
| GPD1         | tan |
| GTF2IRD2     | tan |
| GTF2IRD2B    | tan |
| HIST1H2BC    | tan |
| HIST1H2BD    | tan |
| HIST2H2BF    | tan |
| HKR1         | tan |
| HPCAL4       | tan |
| HSD17B7      | tan |
| IL24         | tan |
| ILKAP        | tan |
| ITGA10       | tan |
| KLKB1        | tan |
| LDHB         | tan |
| LETMD1       | tan |
| LIAS         | tan |
| LOC100129722 | tan |
| LOC100506469 | tan |
| LOC100506548 | tan |
| LOC100506990 | tan |
| LOC100507501 | tan |
| LOC283693    | tan |
| LOC284440    | tan |
| LOC285359    | tan |
| LOC386758    | tan |
| LOC439949    | tan |
| LOC728537    | tan |
| LOC93432     | tan |
| LUC7L        | tan |
| MAGEF1       | tan |
| MEAF6        | tan |
| METTL17      | tan |
| METTL3       | tan |
| MSTO2P       | tan |
| NAP1L4       | tan |
| NPR2         | tan |
| NUP43        | tan |
| NVL          | tan |
| OCM          | tan |
| OVGP1        | tan |
| PCID2        | tan |

|           |                  |
|-----------|------------------|
| PDE6B     | tan              |
| PEX11B    | tan              |
| PMS2P1    | tan              |
| POLR1C    | tan              |
| POPDC2    | tan              |
| PPIE      | tan              |
| PPIH      | tan              |
| PRPSAP2   | tan              |
| PRR3      | tan              |
| PVT1      | tan              |
| RBFA      | tan              |
| RDH16     | tan              |
| RNF216L   | tan              |
| RPP38     | tan              |
| RPS10P7   | tan              |
| RRN3P1    | tan              |
| RSAD1     | tan              |
| SDCCAG3   | tan              |
| SETD4     | tan              |
| SIRT5     | tan              |
| SLC25A17  | tan              |
| SLC25A4   | tan              |
| SMYD5     | tan              |
| SNHG4     | tan              |
| STMN1     | tan              |
| SUPT7L    | tan              |
| TCEA3     | tan              |
| TGFB3     | tan              |
| TSC22D2   | tan              |
| TTC12     | tan              |
| TTC28-AS1 | tan              |
| TTC39C    | tan              |
| UQCC      | tan              |
| VSIG1     | tan              |
| WDR77     | tan              |
| ZNF133    | tan              |
| ZNF185    | tan              |
| ZNF202    | tan              |
| ZNF211    | tan              |
| ZNF232    | tan              |
| ZNF266    | tan              |
| ZNF329    | tan              |
| ZNF343    | tan              |
| ZNF419    | tan              |
| ZNF44     | tan              |
| ZNF530    | tan              |
| ZNF542    | tan              |
| ZNF544    | tan              |
| ZNF563    | tan              |
| ZNF671    | tan              |
| ZNF69     | tan              |
| ZNF773    | tan              |
| ZNF789    | tan              |
|           | 1-Mar turquoise  |
|           | 5-Mar turquoise  |
|           | 6-Mar turquoise  |
|           | 7-Mar turquoise  |
|           | 7-Sep turquoise  |
|           | 9-Sep turquoise  |
|           | 10-Sep turquoise |
|           | 14-Sep turquoise |
|           | 15-Sep turquoise |
| AAAS      | turquoise        |
| AACS      | turquoise        |
| AAMP      | turquoise        |
| AANAT     | turquoise        |
| AASDHPPT  | turquoise        |
| ABCA1     | turquoise        |

|         |           |
|---------|-----------|
| ABCA10  | turquoise |
| ABCA3   | turquoise |
| ABCA5   | turquoise |
| ABCA7   | turquoise |
| ABCB10  | turquoise |
| ABCB6   | turquoise |
| ABCC2   | turquoise |
| ABCD1   | turquoise |
| ABCD2   | turquoise |
| ABCD3   | turquoise |
| ABCE1   | turquoise |
| ABCF3   | turquoise |
| ABHD10  | turquoise |
| ABHD12  | turquoise |
| ABHD13  | turquoise |
| ABHD14B | turquoise |
| ABHD3   | turquoise |
| ABI1    | turquoise |
| ABI2    | turquoise |
| ABI3    | turquoise |
| ABLIM2  | turquoise |
| ABR     | turquoise |
| ACAD10  | turquoise |
| ACAD9   | turquoise |
| ACADM   | turquoise |
| ACADSB  | turquoise |
| ACADVL  | turquoise |
| ACAP1   | turquoise |
| ACAP2   | turquoise |
| ACAT1   | turquoise |
| ACAT2   | turquoise |
| ACBD3   | turquoise |
| ACBD5   | turquoise |
| ACBD6   | turquoise |
| ACCN2   | turquoise |
| ACD     | turquoise |
| ACOT13  | turquoise |
| ACOT7   | turquoise |
| ACP2    | turquoise |
| ACPL2   | turquoise |
| ACSF2   | turquoise |
| ACSF3   | turquoise |
| ACSL4   | turquoise |
| ACSL6   | turquoise |
| ACSS1   | turquoise |
| ACTL6A  | turquoise |
| ACTL9   | turquoise |
| ACTN4   | turquoise |
| ACTR1A  | turquoise |
| ACTR6   | turquoise |
| ACVR1C  | turquoise |
| ACVR2A  | turquoise |
| ACVRL1  | turquoise |
| ACY3    | turquoise |
| ADA     | turquoise |
| ADAM10  | turquoise |
| ADAM15  | turquoise |
| ADAM22  | turquoise |
| ADAMTS5 | turquoise |
| ADAMTS6 | turquoise |
| ADAP1   | turquoise |
| ADC     | turquoise |
| ADCK1   | turquoise |
| ADCK2   | turquoise |
| ADCK3   | turquoise |
| ADD3    | turquoise |
| ADI1    | turquoise |
| ADM2    | turquoise |

|                 |           |
|-----------------|-----------|
| ADORA1          | turquoise |
| ADRBK1          | turquoise |
| ADRM1           | turquoise |
| ADSSL1          | turquoise |
| AEBP1           | turquoise |
| AEBP2           | turquoise |
| AFF4            | turquoise |
| AGAP2           | turquoise |
| AGAP3           | turquoise |
| AGBL3           | turquoise |
| AGER            | turquoise |
| AGFG2           | turquoise |
| AGGF1           | turquoise |
| AGL             | turquoise |
| AGPAT5          | turquoise |
| AGPS            | turquoise |
| AHR             | turquoise |
| AIDA            | turquoise |
| AIFM3           | turquoise |
| AIM2            | turquoise |
| AIMP1           | turquoise |
| AIMP2           | turquoise |
| AK3             | turquoise |
| AKAP11          | turquoise |
| AKAP5           | turquoise |
| AKAP7           | turquoise |
| AKAP8L          | turquoise |
| AKD1            | turquoise |
| AKIP1           | turquoise |
| AKIRIN1         | turquoise |
| AKIRIN2-AS1     | turquoise |
| AKR1B1          | turquoise |
| AKR7A2          | turquoise |
| AKT1            | turquoise |
| AKTIP           | turquoise |
| ALCAM           | turquoise |
| ALDH16A1        | turquoise |
| ALDH4A1         | turquoise |
| ALDOA           | turquoise |
| ALG1            | turquoise |
| ALG10           | turquoise |
| ALG10B          | turquoise |
| ALG11           | turquoise |
| ALG13           | turquoise |
| ALG2            | turquoise |
| ALG3            | turquoise |
| ALG6            | turquoise |
| ALKBH4          | turquoise |
| ALKBH5          | turquoise |
| ALKBH8          | turquoise |
| ALS2CR11        | turquoise |
| ALS2CR8         | turquoise |
| AMD1            | turquoise |
| AMMECR1         | turquoise |
| AMN1            | turquoise |
| ANAPC10         | turquoise |
| ANG             | turquoise |
| ANGEL2          | turquoise |
| ANGPT1          | turquoise |
| ANGPTL4         | turquoise |
| ANGPTL7         | turquoise |
| ANKAR           | turquoise |
| ANKHD1-EIF4EBP3 | turquoise |
| ANKIB1          | turquoise |
| ANKK1           | turquoise |
| ANKLE1          | turquoise |
| ANKMY2          | turquoise |
| ANKRD10         | turquoise |

|           |           |
|-----------|-----------|
| ANKRD12   | turquoise |
| ANKRD13C  | turquoise |
| ANKRD22   | turquoise |
| ANKRD24   | turquoise |
| ANKRD26   | turquoise |
| ANKRD28   | turquoise |
| ANKRD32   | turquoise |
| ANKRD34B  | turquoise |
| ANKRD44   | turquoise |
| ANKRD46   | turquoise |
| ANKRD49   | turquoise |
| ANKRD50   | turquoise |
| ANKRD57   | turquoise |
| ANKUB1    | turquoise |
| ANLN      | turquoise |
| ANO5      | turquoise |
| ANP32E    | turquoise |
| ANUBL1    | turquoise |
| ANXA1     | turquoise |
| AP1AR     | turquoise |
| AP1B1     | turquoise |
| AP1S2     | turquoise |
| AP2A2     | turquoise |
| AP3M1     | turquoise |
| AP3S2     | turquoise |
| AP4S1     | turquoise |
| APC       | turquoise |
| APEH      | turquoise |
| APEX1     | turquoise |
| APEX2     | turquoise |
| APH1A     | turquoise |
| API5      | turquoise |
| APIP      | turquoise |
| APLF      | turquoise |
| APOBEC3D  | turquoise |
| APOO      | turquoise |
| APPBP2    | turquoise |
| APPL1     | turquoise |
| APTX      | turquoise |
| AQP11     | turquoise |
| ARAF      | turquoise |
| ARAP2     | turquoise |
| ARF4      | turquoise |
| ARFGAP1   | turquoise |
| ARFGAP2   | turquoise |
| ARFGEF2   | turquoise |
| ARFIP1    | turquoise |
| ARG2      | turquoise |
| ARGLU1    | turquoise |
| ARHGAP10  | turquoise |
| ARHGAP11A | turquoise |
| ARHGAP12  | turquoise |
| ARHGAP22  | turquoise |
| ARHGAP42  | turquoise |
| ARHGAP5   | turquoise |
| ARHGDI A  | turquoise |
| ARHGEF10L | turquoise |
| ARHGEF2   | turquoise |
| ARID2     | turquoise |
| ARID4A    | turquoise |
| ARID4B    | turquoise |
| ARID5A    | turquoise |
| ARID5B    | turquoise |
| ARL13B    | turquoise |
| ARL15     | turquoise |
| ARL2      | turquoise |
| ARL4A     | turquoise |
| ARL5A     | turquoise |



|                |           |
|----------------|-----------|
| ARL5B          | turquoise |
| ARL6IP1        | turquoise |
| ARL6IP5        | turquoise |
| ARL6IP6        | turquoise |
| ARL8B          | turquoise |
| ARMC1          | turquoise |
| ARMC10         | turquoise |
| ARMC7          | turquoise |
| ARMCX5         | turquoise |
| ARMCX5-GPRASP2 | turquoise |
| ARPC4          | turquoise |
| ARPP19         | turquoise |
| ARRB1          | turquoise |
| ARRDC3         | turquoise |
| ARRDC4         | turquoise |
| ARSA           | turquoise |
| ARSK           | turquoise |
| ARV1           | turquoise |
| ARVCF          | turquoise |
| ASAP3          | turquoise |
| ASB13          | turquoise |
| ASB7           | turquoise |
| ASF1A          | turquoise |
| ASGR1          | turquoise |
| ASGR2          | turquoise |
| ASMTL          | turquoise |
| ASMTL-AS1      | turquoise |
| ASNA1          | turquoise |
| ASNSD1         | turquoise |
| ASPH           | turquoise |
| ASPM           | turquoise |
| ASTE1          | turquoise |
| ASTL           | turquoise |
| ATAD1          | turquoise |
| ATAD2          | turquoise |
| ATAD2B         | turquoise |
| ATAD3A         | turquoise |
| ATF1           | turquoise |
| ATF2           | turquoise |
| ATG12          | turquoise |
| ATG16L2        | turquoise |
| ATG4A          | turquoise |
| ATG4B          | turquoise |
| ATG4C          | turquoise |
| ATG5           | turquoise |
| ATG9A          | turquoise |
| ATL2           | turquoise |
| ATP10D         | turquoise |
| ATP11B         | turquoise |
| ATP11C         | turquoise |
| ATP13A2        | turquoise |
| ATP13A3        | turquoise |
| ATP2B1         | turquoise |
| ATP2C1         | turquoise |
| ATP5C1         | turquoise |
| ATP5E          | turquoise |
| ATP5F1         | turquoise |
| ATP5I          | turquoise |
| ATP5L          | turquoise |
| ATP5O          | turquoise |
| ATP6AP1        | turquoise |
| ATP6V1G1       | turquoise |
| ATP7A          | turquoise |
| ATP8A1         | turquoise |
| ATP8A2         | turquoise |
| ATP8B4         | turquoise |
| ATPAF2         | turquoise |
| ATPBBD4        | turquoise |

|          |           |
|----------|-----------|
| ATRX     | turquoise |
| ATXN7L2  | turquoise |
| ATXN7L3  | turquoise |
| AUH      | turquoise |
| AURKC    | turquoise |
| AZI1     | turquoise |
| AZI2     | turquoise |
| AZIN1    | turquoise |
| B2M      | turquoise |
| B3GALNT1 | turquoise |
| B3GALT2  | turquoise |
| B3GALTL  | turquoise |
| B3GNT1   | turquoise |
| B3GNT2   | turquoise |
| B3GNT5   | turquoise |
| B4GALT3  | turquoise |
| B4GALT6  | turquoise |
| BACH1    | turquoise |
| BAG2     | turquoise |
| BAG4     | turquoise |
| BAG6     | turquoise |
| BAIAP2   | turquoise |
| BANF1    | turquoise |
| BAP1     | turquoise |
| BAZ1A    | turquoise |
| BAZ2B    | turquoise |
| BBIP1    | turquoise |
| BBS10    | turquoise |
| BBS12    | turquoise |
| BBS7     | turquoise |
| BBX      | turquoise |
| BCAP29   | turquoise |
| BCAP31   | turquoise |
| BCAS2    | turquoise |
| BCAS4    | turquoise |
| BCAT1    | turquoise |
| BCAT2    | turquoise |
| BCKDHB   | turquoise |
| BCL2A1   | turquoise |
| BCL2L15  | turquoise |
| BCLAF1   | turquoise |
| BCR      | turquoise |
| BCRP2    | turquoise |
| BDH2     | turquoise |
| BDP1     | turquoise |
| BET1     | turquoise |
| BGLAP    | turquoise |
| BHLHB9   | turquoise |
| BIN1     | turquoise |
| BIRC2    | turquoise |
| BIRC3    | turquoise |
| BLOC1S2  | turquoise |
| BLZF1    | turquoise |
| BMF      | turquoise |
| BMI1     | turquoise |
| BMP1     | turquoise |
| BMPR1A   | turquoise |
| BMPR2    | turquoise |
| BNIP1    | turquoise |
| BNIP2    | turquoise |
| BNIP3L   | turquoise |
| BNIPL    | turquoise |
| BORA     | turquoise |
| BRCA2    | turquoise |
| BRCC3    | turquoise |
| BRD9     | turquoise |
| BRIP1    | turquoise |
| BRMS1    | turquoise |

|           |           |
|-----------|-----------|
| BRMS1L    | turquoise |
| BRP44L    | turquoise |
| BRWD1     | turquoise |
| BTAF1     | turquoise |
| BTBD1     | turquoise |
| BTBD10    | turquoise |
| BTBD3     | turquoise |
| BTB       | turquoise |
| BTF3L4    | turquoise |
| BTLA      | turquoise |
| BUD13     | turquoise |
| BYSL      | turquoise |
| BZW1      | turquoise |
| C10orf11  | turquoise |
| C10orf118 | turquoise |
| C10orf131 | turquoise |
| C10orf2   | turquoise |
| C10orf32  | turquoise |
| C10orf68  | turquoise |
| C11orf1   | turquoise |
| C11orf24  | turquoise |
| C11orf46  | turquoise |
| C11orf49  | turquoise |
| C11orf54  | turquoise |
| C11orf57  | turquoise |
| C11orf58  | turquoise |
| C11orf61  | turquoise |
| C11orf66  | turquoise |
| C11orf68  | turquoise |
| C11orf84  | turquoise |
| C12orf23  | turquoise |
| C12orf26  | turquoise |
| C12orf29  | turquoise |
| C12orf34  | turquoise |
| C12orf35  | turquoise |
| C12orf4   | turquoise |
| C12orf45  | turquoise |
| C12orf48  | turquoise |
| C12orf52  | turquoise |
| C12orf53  | turquoise |
| C14orf101 | turquoise |
| C14orf126 | turquoise |
| C14orf129 | turquoise |
| C14orf135 | turquoise |
| C14orf142 | turquoise |
| C14orf148 | turquoise |
| C14orf153 | turquoise |
| C14orf166 | turquoise |
| C14orf167 | turquoise |
| C14orf176 | turquoise |
| C14orf2   | turquoise |
| C14orf28  | turquoise |
| C14orf93  | turquoise |
| C15orf24  | turquoise |
| C15orf34  | turquoise |
| C15orf58  | turquoise |
| C16orf5   | turquoise |
| C16orf52  | turquoise |
| C16orf61  | turquoise |
| C16orf71  | turquoise |
| C16orf72  | turquoise |
| C16orf87  | turquoise |
| C17orf101 | turquoise |
| C17orf104 | turquoise |
| C17orf42  | turquoise |
| C17orf55  | turquoise |
| C17orf58  | turquoise |
| C17orf61  | turquoise |

|           |           |
|-----------|-----------|
| C17orf62  | turquoise |
| C17orf72  | turquoise |
| C17orf96  | turquoise |
| C18orf1   | turquoise |
| C18orf19  | turquoise |
| C18orf25  | turquoise |
| C18orf54  | turquoise |
| C19orf44  | turquoise |
| C19orf47  | turquoise |
| C19orf52  | turquoise |
| C19orf54  | turquoise |
| C19orf63  | turquoise |
| C19orf76  | turquoise |
| C1GALT1   | turquoise |
| C1orf112  | turquoise |
| C1orf124  | turquoise |
| C1orf127  | turquoise |
| C1orf131  | turquoise |
| C1orf162  | turquoise |
| C1orf172  | turquoise |
| C1orf200  | turquoise |
| C1orf27   | turquoise |
| C1orf43   | turquoise |
| C1orf9    | turquoise |
| C1orf93   | turquoise |
| C1orf96   | turquoise |
| C1orf97   | turquoise |
| C1QA      | turquoise |
| C1QB      | turquoise |
| C1QC      | turquoise |
| C1QL3     | turquoise |
| C1QTNF7   | turquoise |
| C1R       | turquoise |
| C20orf111 | turquoise |
| C20orf177 | turquoise |
| C20orf197 | turquoise |
| C20orf29  | turquoise |
| C20orf72  | turquoise |
| C20orf94  | turquoise |
| C20orf96  | turquoise |
| C21orf33  | turquoise |
| C21orf70  | turquoise |
| C21orf91  | turquoise |
| C22orf25  | turquoise |
| C2CD2L    | turquoise |
| C2orf43   | turquoise |
| C2orf47   | turquoise |
| C2orf49   | turquoise |
| C2orf67   | turquoise |
| C2orf69   | turquoise |
| C2orf74   | turquoise |
| C2orf76   | turquoise |
| C2orf85   | turquoise |
| C3orf14   | turquoise |
| C3orf17   | turquoise |
| C3orf21   | turquoise |
| C3orf23   | turquoise |
| C3orf38   | turquoise |
| C3orf39   | turquoise |
| C3orf45   | turquoise |
| C3orf58   | turquoise |
| C3orf63   | turquoise |
| C3orf64   | turquoise |
| C4orf10   | turquoise |
| C4orf21   | turquoise |
| C4orf29   | turquoise |
| C4orf32   | turquoise |
| C4orf33   | turquoise |

|          |           |
|----------|-----------|
| C4orf34  | turquoise |
| C4orf39  | turquoise |
| C4orf46  | turquoise |
| C4orf52  | turquoise |
| C5orf15  | turquoise |
| C5orf22  | turquoise |
| C5orf24  | turquoise |
| C5orf30  | turquoise |
| C5orf35  | turquoise |
| C5orf41  | turquoise |
| C5orf43  | turquoise |
| C5orf44  | turquoise |
| C5orf53  | turquoise |
| C5orf54  | turquoise |
| C5orf56  | turquoise |
| C6orf105 | turquoise |
| C6orf120 | turquoise |
| C6orf162 | turquoise |
| C6orf204 | turquoise |
| C6orf211 | turquoise |
| C6orf35  | turquoise |
| C6orf47  | turquoise |
| C6orf62  | turquoise |
| C6orf72  | turquoise |
| C6orf97  | turquoise |
| C7orf26  | turquoise |
| C7orf36  | turquoise |
| C7orf58  | turquoise |
| C7orf60  | turquoise |
| C7orf61  | turquoise |
| C7orf64  | turquoise |
| C8orf37  | turquoise |
| C8orf39  | turquoise |
| C8orf40  | turquoise |
| C8orf58  | turquoise |
| C8orf59  | turquoise |
| C8orf83  | turquoise |
| C8orf84  | turquoise |
| C9orf130 | turquoise |
| C9orf139 | turquoise |
| C9orf167 | turquoise |
| C9orf21  | turquoise |
| C9orf41  | turquoise |
| C9orf71  | turquoise |
| C9orf72  | turquoise |
| C9orf80  | turquoise |
| C9orf82  | turquoise |
| C9orf85  | turquoise |
| C9orf86  | turquoise |
| CA11     | turquoise |
| CA12     | turquoise |
| CA5BP1   | turquoise |
| CAB39    | turquoise |
| CAB39L   | turquoise |
| CABIN1   | turquoise |
| CACNA1H  | turquoise |
| CACNB3   | turquoise |
| CACNB4   | turquoise |
| CALB1    | turquoise |
| CALCRL   | turquoise |
| CALHM2   | turquoise |
| CALM2    | turquoise |
| CALML4   | turquoise |
| CALML6   | turquoise |
| CALU     | turquoise |
| CAMK1    | turquoise |
| CAMK2D   | turquoise |
| CAMK4    | turquoise |

|           |           |
|-----------|-----------|
| CAMLG     | turquoise |
| CAMSAP1L1 | turquoise |
| CAPG      | turquoise |
| CAPN14    | turquoise |
| CAPN7     | turquoise |
| CAPS2     | turquoise |
| CAPZA1    | turquoise |
| CAPZA2    | turquoise |
| CARD17    | turquoise |
| CARD8     | turquoise |
| CARHSP1   | turquoise |
| CASC4     | turquoise |
| CASC5     | turquoise |
| CASD1     | turquoise |
| CASP3     | turquoise |
| CASP8     | turquoise |
| CASP8AP2  | turquoise |
| CATSPERB  | turquoise |
| CATSPERG  | turquoise |
| CBFB      | turquoise |
| CBLL1     | turquoise |
| CBR4      | turquoise |
| CBWD1     | turquoise |
| CBWD2     | turquoise |
| CBX3      | turquoise |
| CC2D1A    | turquoise |
| CCBL2     | turquoise |
| CCDC102A  | turquoise |
| CCDC103   | turquoise |
| CCDC104   | turquoise |
| CCDC112   | turquoise |
| CCDC115   | turquoise |
| CCDC117   | turquoise |
| CCDC121   | turquoise |
| CCDC126   | turquoise |
| CCDC13    | turquoise |
| CCDC132   | turquoise |
| CCDC136   | turquoise |
| CCDC137   | turquoise |
| CCDC138   | turquoise |
| CCDC14    | turquoise |
| CCDC146   | turquoise |
| CCDC154   | turquoise |
| CCDC159   | turquoise |
| CCDC18    | turquoise |
| CCDC25    | turquoise |
| CCDC30    | turquoise |
| CCDC34    | turquoise |
| CCDC39    | turquoise |
| CCDC41    | turquoise |
| CCDC42B   | turquoise |
| CCDC43    | turquoise |
| CCDC53    | turquoise |
| CCDC58    | turquoise |
| CCDC59    | turquoise |
| CCDC6     | turquoise |
| CCDC65    | turquoise |
| CCDC66    | turquoise |
| CCDC7     | turquoise |
| CCDC71    | turquoise |
| CCDC72    | turquoise |
| CCDC73    | turquoise |
| CCDC75    | turquoise |
| CCDC76    | turquoise |
| CCDC82    | turquoise |
| CCDC85C   | turquoise |
| CCDC86    | turquoise |
| CCDC88A   | turquoise |

|          |           |
|----------|-----------|
| CCDC88B  | turquoise |
| CCDC9    | turquoise |
| CCDC90A  | turquoise |
| CCDC90B  | turquoise |
| CCDC91   | turquoise |
| CCDC92   | turquoise |
| CCDC97   | turquoise |
| CCM2     | turquoise |
| CCNA2    | turquoise |
| CCNC     | turquoise |
| CCND3    | turquoise |
| CCNE2    | turquoise |
| CCNG1    | turquoise |
| CCNG2    | turquoise |
| CCNH     | turquoise |
| CCNL1    | turquoise |
| CCNT2    | turquoise |
| CCNY     | turquoise |
| CCNYL1   | turquoise |
| CCP110   | turquoise |
| CCPG1    | turquoise |
| CCT2     | turquoise |
| CCT6B    | turquoise |
| CCZ1     | turquoise |
| CD109    | turquoise |
| CD164    | turquoise |
| CD200R1  | turquoise |
| CD244    | turquoise |
| CD248    | turquoise |
| CD27     | turquoise |
| CD274    | turquoise |
| CD28     | turquoise |
| CD2AP    | turquoise |
| CD2BP2   | turquoise |
| CD33     | turquoise |
| CD37     | turquoise |
| CD46     | turquoise |
| CD47     | turquoise |
| CD48     | turquoise |
| CD5      | turquoise |
| CD52     | turquoise |
| CD58     | turquoise |
| CD63     | turquoise |
| CD69     | turquoise |
| CD80     | turquoise |
| CD81     | turquoise |
| CDADC1   | turquoise |
| CDC14A   | turquoise |
| CDC25C   | turquoise |
| CDC26    | turquoise |
| CDC27    | turquoise |
| CDC37    | turquoise |
| CDC37L1  | turquoise |
| CDC40    | turquoise |
| CDC42EP1 | turquoise |
| CDC42EP2 | turquoise |
| CDC42SE2 | turquoise |
| CDC7     | turquoise |
| CDC73    | turquoise |
| CDCA7    | turquoise |
| CDH26    | turquoise |
| CDHR1    | turquoise |
| CDHR5    | turquoise |
| CDIPT    | turquoise |
| CDK1     | turquoise |
| CDK11A   | turquoise |
| CDK11B   | turquoise |
| CDK17    | turquoise |

|          |           |
|----------|-----------|
| CDK18    | turquoise |
| CDK2     | turquoise |
| CDK5R1   | turquoise |
| CDK5RAP3 | turquoise |
| CDK7     | turquoise |
| CDK8     | turquoise |
| CDK9     | turquoise |
| CDKL1    | turquoise |
| CDKL2    | turquoise |
| CDKN1B   | turquoise |
| CDKN1C   | turquoise |
| CDKN2AIP | turquoise |
| CDKN2C   | turquoise |
| CDKN3    | turquoise |
| CDS1     | turquoise |
| CDT1     | turquoise |
| CEACAM19 | turquoise |
| CEBPA    | turquoise |
| CEBPG    | turquoise |
| CEBPZ    | turquoise |
| CENPE    | turquoise |
| CENPK    | turquoise |
| CENPL    | turquoise |
| CENPQ    | turquoise |
| CENPW    | turquoise |
| CEP120   | turquoise |
| CEP135   | turquoise |
| CEP152   | turquoise |
| CEP170   | turquoise |
| CEP19    | turquoise |
| CEP250   | turquoise |
| CEP290   | turquoise |
| CEP350   | turquoise |
| CEP44    | turquoise |
| CEP57    | turquoise |
| CEP57L1  | turquoise |
| CEP70    | turquoise |
| CEP95    | turquoise |
| CEP97    | turquoise |
| CEPT1    | turquoise |
| CERCAM   | turquoise |
| CERS5    | turquoise |
| CES4A    | turquoise |
| CETN3    | turquoise |
| CFDP1    | turquoise |
| CFH      | turquoise |
| CFL1P1   | turquoise |
| CFP      | turquoise |
| CGGBP1   | turquoise |
| CGN      | turquoise |
| CGRRF1   | turquoise |
| CHAC2    | turquoise |
| CHAF1A   | turquoise |
| CHAF1B   | turquoise |
| CHCHD4   | turquoise |
| CHD1     | turquoise |
| CHD5     | turquoise |
| CHD9     | turquoise |
| CHERP    | turquoise |
| CHFR     | turquoise |
| CHIC1    | turquoise |
| CHID1    | turquoise |
| CHM      | turquoise |
| CHML     | turquoise |
| CHMP1A   | turquoise |
| CHMP1B   | turquoise |
| CHMP2A   | turquoise |
| CHMP2B   | turquoise |



|         |           |
|---------|-----------|
| CHN2    | turquoise |
| CHORDC1 | turquoise |
| CHPF    | turquoise |
| CHPF2   | turquoise |
| CHST13  | turquoise |
| CHST14  | turquoise |
| CHST2   | turquoise |
| CHSY1   | turquoise |
| CHUK    | turquoise |
| CHURC1  | turquoise |
| CIDEB   | turquoise |
| CISD1   | turquoise |
| CISD2   | turquoise |
| CISH    | turquoise |
| CKAP2   | turquoise |
| CKB     | turquoise |
| CKS1B   | turquoise |
| CKS2    | turquoise |
| CLCN2   | turquoise |
| CLCN7   | turquoise |
| CLDN12  | turquoise |
| CLDND1  | turquoise |
| CLEC2B  | turquoise |
| CLEC2D  | turquoise |
| CLEC5A  | turquoise |
| CLEC6A  | turquoise |
| CLEC7A  | turquoise |
| CLECL1  | turquoise |
| CLIC2   | turquoise |
| CLIC4   | turquoise |
| CLIP3   | turquoise |
| CLIP4   | turquoise |
| CLK1    | turquoise |
| CLK3    | turquoise |
| CLK4    | turquoise |
| CLN3    | turquoise |
| CLN5    | turquoise |
| CLN6    | turquoise |
| CLNS1A  | turquoise |
| CLP1    | turquoise |
| CLPTM1  | turquoise |
| CLPTM1L | turquoise |
| CLSTN3  | turquoise |
| CMAHP   | turquoise |
| CMC1    | turquoise |
| CMPK1   | turquoise |
| CMTM3   | turquoise |
| CMTM6   | turquoise |
| CMTM7   | turquoise |
| CNBP    | turquoise |
| CNIH    | turquoise |
| CNKS1   | turquoise |
| CNKS2   | turquoise |
| CNN3    | turquoise |
| CNOT2   | turquoise |
| CNOT3   | turquoise |
| CNOT6   | turquoise |
| CNOT6L  | turquoise |
| CNOT7   | turquoise |
| CNOT8   | turquoise |
| CNP     | turquoise |
| CNPPD1  | turquoise |
| CNPY3   | turquoise |
| CNR1    | turquoise |
| CNTROB  | turquoise |
| COASY   | turquoise |
| COBRA1  | turquoise |
| COG3    | turquoise |

|            |           |
|------------|-----------|
| COG4       | turquoise |
| COG6       | turquoise |
| COIL       | turquoise |
| COL24A1    | turquoise |
| COL4A3BP   | turquoise |
| COL7A1     | turquoise |
| COLQ       | turquoise |
| COMMD10    | turquoise |
| COMMD2     | turquoise |
| COMMD3     | turquoise |
| COMMD6     | turquoise |
| COMMD8     | turquoise |
| COMT       | turquoise |
| COPE       | turquoise |
| COPS2      | turquoise |
| COPS4      | turquoise |
| COPS5      | turquoise |
| COPS6      | turquoise |
| COPZ1      | turquoise |
| COQ10B     | turquoise |
| COQ2       | turquoise |
| CORO1A     | turquoise |
| CORO7      | turquoise |
| COX16      | turquoise |
| COX19      | turquoise |
| COX4NB     | turquoise |
| COX6C      | turquoise |
| COX7A2     | turquoise |
| COX7A2L    | turquoise |
| COX7B      | turquoise |
| COX7C      | turquoise |
| CPAMD8     | turquoise |
| CPD        | turquoise |
| CPEB2      | turquoise |
| CPEB3      | turquoise |
| CPEB4      | turquoise |
| CPNE1      | turquoise |
| CPNE3      | turquoise |
| CPNE5      | turquoise |
| CPNE8      | turquoise |
| CPSF1      | turquoise |
| CPSF6      | turquoise |
| CRABP2     | turquoise |
| CRAT       | turquoise |
| CRBN       | turquoise |
| CRCP       | turquoise |
| CREB1      | turquoise |
| CREB5      | turquoise |
| CREBL2     | turquoise |
| CREBZF     | turquoise |
| CRIM1      | turquoise |
| CRIPAK     | turquoise |
| CRIPT      | turquoise |
| CRK        | turquoise |
| CRLF3      | turquoise |
| CRLS1      | turquoise |
| CROCCP2    | turquoise |
| CROT       | turquoise |
| CRTC2      | turquoise |
| CRY1       | turquoise |
| CSGALNACT1 | turquoise |
| CSGALNACT2 | turquoise |
| CSK        | turquoise |
| CSNK1A1    | turquoise |
| CSNK1A1L   | turquoise |
| CSNK1G3    | turquoise |
| CSNK2B     | turquoise |
| CSR1       | turquoise |

|         |           |
|---------|-----------|
| CST3    | turquoise |
| CSTA    | turquoise |
| CSTF2T  | turquoise |
| CTBP1   | turquoise |
| CTBS    | turquoise |
| CTDNEP1 | turquoise |
| CTDSP1  | turquoise |
| CTDSPL2 | turquoise |
| CTNS    | turquoise |
| CTSH    | turquoise |
| CTSO    | turquoise |
| CTSS    | turquoise |
| CTSW    | turquoise |
| CUL2    | turquoise |
| CUL4B   | turquoise |
| CUL5    | turquoise |
| CUTC    | turquoise |
| CWF19L2 | turquoise |
| CXADR   | turquoise |
| CXCL10  | turquoise |
| CXCL6   | turquoise |
| CXCL9   | turquoise |
| CXorf21 | turquoise |
| CXorf23 | turquoise |
| CXorf57 | turquoise |
| CXXC1   | turquoise |
| CYB561  | turquoise |
| CYB5R4  | turquoise |
| CYBA    | turquoise |
| CYBASC3 | turquoise |
| CYBRD1  | turquoise |
| CYCS    | turquoise |
| CYHR1   | turquoise |
| CYP2S1  | turquoise |
| CYP2U1  | turquoise |
| CYP2W1  | turquoise |
| CYP4F22 | turquoise |
| CYSLTR1 | turquoise |
| CYTH2   | turquoise |
| CYXR1   | turquoise |
| D4S234E | turquoise |
| DAB2IP  | turquoise |
| DACH1   | turquoise |
| DAGLB   | turquoise |
| DAK     | turquoise |
| DAPK3   | turquoise |
| DAPP1   | turquoise |
| DAXX    | turquoise |
| DAZAP1  | turquoise |
| DBF4    | turquoise |
| DBI     | turquoise |
| DBN1    | turquoise |
| DBP     | turquoise |
| DCAF10  | turquoise |
| DCAF11  | turquoise |
| DCAF13  | turquoise |
| DCAKD   | turquoise |
| DCBLD2  | turquoise |
| DCDC2B  | turquoise |
| DCK     | turquoise |
| DCLRE1A | turquoise |
| DCP1A   | turquoise |
| DCP2    | turquoise |
| DCPS    | turquoise |
| DCST2   | turquoise |
| DCTN2   | turquoise |
| DCTN4   | turquoise |
| DCTN6   | turquoise |

|               |           |
|---------------|-----------|
| DCUN1D1       | turquoise |
| DCUN1D4       | turquoise |
| DCUN1D5       | turquoise |
| DDA1          | turquoise |
| DDB2          | turquoise |
| DDOST         | turquoise |
| DDRGK1        | turquoise |
| DDX11         | turquoise |
| DDX12         | turquoise |
| DDX26B        | turquoise |
| DDX3X         | turquoise |
| DDX41         | turquoise |
| DDX50         | turquoise |
| DDX54         | turquoise |
| DDX59         | turquoise |
| DECR1         | turquoise |
| DEF6          | turquoise |
| DEF8          | turquoise |
| DEGS1         | turquoise |
| DEGS2         | turquoise |
| DEK           | turquoise |
| DENND1B       | turquoise |
| DENND1C       | turquoise |
| DENND4A       | turquoise |
| DENND4C       | turquoise |
| DENR          | turquoise |
| DEPDC1        | turquoise |
| DEPDC1B       | turquoise |
| DERL1         | turquoise |
| DEXI          | turquoise |
| DGCR14        | turquoise |
| DGCR8         | turquoise |
| DGKE          | turquoise |
| DGKZ          | turquoise |
| DHFR          | turquoise |
| DHFRL1        | turquoise |
| DHPS          | turquoise |
| DHRS1         | turquoise |
| DHRS11        | turquoise |
| DHRS9         | turquoise |
| DHX30         | turquoise |
| DHX36         | turquoise |
| DHX40         | turquoise |
| DIAPH3        | turquoise |
| DICER1        | turquoise |
| DIMT1L        | turquoise |
| DIP2B         | turquoise |
| DIRC2         | turquoise |
| DIS3          | turquoise |
| DIS3L2        | turquoise |
| DIXDC1        | turquoise |
| DKFZP434I0714 | turquoise |
| DKFZP564C196  | turquoise |
| DKFZP586I1420 | turquoise |
| DKK3          | turquoise |
| DLAT          | turquoise |
| DLEU7         | turquoise |
| DLG1          | turquoise |
| DLG4          | turquoise |
| DLGAP4        | turquoise |
| DMAP1         | turquoise |
| DMPK          | turquoise |
| DMTF1         | turquoise |
| DMXL1         | turquoise |
| DNA2          | turquoise |
| DNAH6         | turquoise |
| DNAI2         | turquoise |
| DNAJA1        | turquoise |

|           |           |
|-----------|-----------|
| DNAJB14   | turquoise |
| DNAJB2    | turquoise |
| DNAJB4    | turquoise |
| DNAJB9    | turquoise |
| DNAJC10   | turquoise |
| DNAJC15   | turquoise |
| DNAJC21   | turquoise |
| DNAJC24   | turquoise |
| DNAJC25   | turquoise |
| DNAJC27   | turquoise |
| DNASE1L1  | turquoise |
| DNASE2    | turquoise |
| DNPEP     | turquoise |
| DNTTIP2   | turquoise |
| DOCK11    | turquoise |
| DOHH      | turquoise |
| DOLPP1    | turquoise |
| DONSON    | turquoise |
| DOT1L     | turquoise |
| DPEP2     | turquoise |
| DPH3      | turquoise |
| DPM1      | turquoise |
| DPP3      | turquoise |
| DPY19L1   | turquoise |
| DPY19L2P2 | turquoise |
| DPY19L3   | turquoise |
| DPY19L4   | turquoise |
| DPY30     | turquoise |
| DR1       | turquoise |
| DRAM2     | turquoise |
| DRAP1     | turquoise |
| DSC1      | turquoise |
| DSC2      | turquoise |
| DSEL      | turquoise |
| DTNB      | turquoise |
| DTNBP1    | turquoise |
| DTWD1     | turquoise |
| DTX2      | turquoise |
| DUSP11    | turquoise |
| DUSP19    | turquoise |
| DYNC2L1   | turquoise |
| DYNLRB1   | turquoise |
| DYNLT3    | turquoise |
| DYRK1A    | turquoise |
| DYRK1B    | turquoise |
| DYRK2     | turquoise |
| DZIP3     | turquoise |
| E2F4      | turquoise |
| E2F6      | turquoise |
| E2F7      | turquoise |
| EAF2      | turquoise |
| EAPP      | turquoise |
| EBAG9     | turquoise |
| EBF4      | turquoise |
| ECH1      | turquoise |
| ECHDC1    | turquoise |
| ECHS1     | turquoise |
| ECT2      | turquoise |
| ECT2L     | turquoise |
| EDEM3     | turquoise |
| EEA1      | turquoise |
| EED       | turquoise |
| EEF1A1    | turquoise |
| EEF1B2    | turquoise |
| EEF1E1    | turquoise |
| EEFSEC    | turquoise |
| EFCAB11   | turquoise |
| EFCAB7    | turquoise |

|          |           |
|----------|-----------|
| EFHA1    | turquoise |
| EFHD2    | turquoise |
| EFNA3    | turquoise |
| EFNB1    | turquoise |
| EFR3A    | turquoise |
| EGLN1    | turquoise |
| EHMT2    | turquoise |
| EID1     | turquoise |
| EIF1AX   | turquoise |
| EIF2A    | turquoise |
| EIF2B5   | turquoise |
| EIF2S2   | turquoise |
| EIF3D    | turquoise |
| EIF3E    | turquoise |
| EIF3J    | turquoise |
| EIF4E    | turquoise |
| EIF4E2   | turquoise |
| EIF4E3   | turquoise |
| EIF5     | turquoise |
| EIF5A2   | turquoise |
| EIF6     | turquoise |
| ELAC2    | turquoise |
| ELF2     | turquoise |
| ELK4     | turquoise |
| ELL2     | turquoise |
| ELMOD2   | turquoise |
| ELOF1    | turquoise |
| ELOVL4   | turquoise |
| EMB      | turquoise |
| EMBP1    | turquoise |
| EMILIN1  | turquoise |
| EML2     | turquoise |
| EML5     | turquoise |
| EMP3     | turquoise |
| ENDOG    | turquoise |
| ENDOV    | turquoise |
| ENG      | turquoise |
| ENTPD6   | turquoise |
| ENY2     | turquoise |
| EPB41L5  | turquoise |
| EPC2     | turquoise |
| EPHB3    | turquoise |
| EPHB6    | turquoise |
| EPM2AIP1 | turquoise |
| EPN1     | turquoise |
| EPS15    | turquoise |
| EPT1     | turquoise |
| ERAL1    | turquoise |
| ERBB2IP  | turquoise |
| ERCC2    | turquoise |
| ERCC8    | turquoise |
| EREG     | turquoise |
| ERGIC2   | turquoise |
| ERH      | turquoise |
| ERI1     | turquoise |
| ERI2     | turquoise |
| ERLEC1   | turquoise |
| ERLIN1   | turquoise |
| ERN1     | turquoise |
| ERO1L    | turquoise |
| ERO1LB   | turquoise |
| ESCO1    | turquoise |
| ESCO2    | turquoise |
| ESF1     | turquoise |
| ESR2     | turquoise |
| ETAA1    | turquoise |
| ETFA     | turquoise |
| ETNK1    | turquoise |

|           |           |
|-----------|-----------|
| EVI2A     | turquoise |
| EVI2B     | turquoise |
| EWSR1     | turquoise |
| EXOC1     | turquoise |
| EXOC3     | turquoise |
| EXOC3L2   | turquoise |
| EXOC5     | turquoise |
| EXOC6     | turquoise |
| EXOC8     | turquoise |
| EXPH5     | turquoise |
| EXTL2     | turquoise |
| EYS       | turquoise |
| F2RL1     | turquoise |
| F8        | turquoise |
| FABP5     | turquoise |
| FAM100A   | turquoise |
| FAM102B   | turquoise |
| FAM105A   | turquoise |
| FAM108B1  | turquoise |
| FAM109B   | turquoise |
| FAM110A   | turquoise |
| FAM111A   | turquoise |
| FAM113B   | turquoise |
| FAM114A1  | turquoise |
| FAM116A   | turquoise |
| FAM117B   | turquoise |
| FAM120AOS | turquoise |
| FAM122B   | turquoise |
| FAM125A   | turquoise |
| FAM126A   | turquoise |
| FAM126B   | turquoise |
| FAM127A   | turquoise |
| FAM133B   | turquoise |
| FAM134A   | turquoise |
| FAM134B   | turquoise |
| FAM135A   | turquoise |
| FAM13AOS  | turquoise |
| FAM13B    | turquoise |
| FAM149B1  | turquoise |
| FAM151B   | turquoise |
| FAM160B1  | turquoise |
| FAM161A   | turquoise |
| FAM164A   | turquoise |
| FAM169A   | turquoise |
| FAM171A2  | turquoise |
| FAM172A   | turquoise |
| FAM173B   | turquoise |
| FAM175A   | turquoise |
| FAM177A1  | turquoise |
| FAM179B   | turquoise |
| FAM184A   | turquoise |
| FAM185A   | turquoise |
| FAM188A   | turquoise |
| FAM189B   | turquoise |
| FAM18B1   | turquoise |
| FAM198B   | turquoise |
| FAM199X   | turquoise |
| FAM19A2   | turquoise |
| FAM200A   | turquoise |
| FAM200B   | turquoise |
| FAM203A   | turquoise |
| FAM204A   | turquoise |
| FAM20C    | turquoise |
| FAM32A    | turquoise |
| FAM35A    | turquoise |
| FAM35B    | turquoise |
| FAM3C     | turquoise |
| FAM45B    | turquoise |

|         |           |
|---------|-----------|
| FAM46A  | turquoise |
| FAM49B  | turquoise |
| FAM50A  | turquoise |
| FAM50B  | turquoise |
| FAM53B  | turquoise |
| FAM59B  | turquoise |
| FAM60A  | turquoise |
| FAM63B  | turquoise |
| FAM65A  | turquoise |
| FAM69A  | turquoise |
| FAM72D  | turquoise |
| FAM73A  | turquoise |
| FAM76B  | turquoise |
| FAM82A1 | turquoise |
| FAM82A2 | turquoise |
| FAM82B  | turquoise |
| FAM83H  | turquoise |
| FAM84B  | turquoise |
| FAM86EP | turquoise |
| FAM8A1  | turquoise |
| FAM91A1 | turquoise |
| FAM92A1 | turquoise |
| FAM96A  | turquoise |
| FANCB   | turquoise |
| FANCL   | turquoise |
| FANCM   | turquoise |
| FAR1    | turquoise |
| FAR2    | turquoise |
| FARS2   | turquoise |
| FARSA   | turquoise |
| FAS     | turquoise |
| FASTKD1 | turquoise |
| FASTKD3 | turquoise |
| FBXL13  | turquoise |
| FBXL16  | turquoise |
| FBXL17  | turquoise |
| FBXL3   | turquoise |
| FBXL4   | turquoise |
| FBXL5   | turquoise |
| FBXO11  | turquoise |
| FBXO28  | turquoise |
| FBXO3   | turquoise |
| FBXO30  | turquoise |
| FBXO31  | turquoise |
| FBXO33  | turquoise |
| FBXO4   | turquoise |
| FBXO42  | turquoise |
| FBXO45  | turquoise |
| FBXO46  | turquoise |
| FBXO48  | turquoise |
| FBXO5   | turquoise |
| FBXO8   | turquoise |
| FBXW4   | turquoise |
| FBXW7   | turquoise |
| FCER1A  | turquoise |
| FCF1    | turquoise |
| FCGR2B  | turquoise |
| FCGR2C  | turquoise |
| FCHO1   | turquoise |
| FCHO2   | turquoise |
| FDFT1   | turquoise |
| FDPS    | turquoise |
| FDXACB1 | turquoise |
| FEM1A   | turquoise |
| FEM1C   | turquoise |
| FER     | turquoise |
| FERMT3  | turquoise |
| FGD2    | turquoise |



|          |           |
|----------|-----------|
| FGD3     | turquoise |
| FGD4     | turquoise |
| FGF7     | turquoise |
| FGFR10P  | turquoise |
| FGFR10P2 | turquoise |
| FGFR4    | turquoise |
| FGL2     | turquoise |
| FHL3     | turquoise |
| FHOD1    | turquoise |
| FIGNL1   | turquoise |
| FITM1    | turquoise |
| FIZ1     | turquoise |
| FKBP10   | turquoise |
| FKBP3    | turquoise |
| FKBP7    | turquoise |
| FLII     | turquoise |
| FLJ21408 | turquoise |
| FLJ27354 | turquoise |
| FLJ31306 | turquoise |
| FLJ33630 | turquoise |
| FLJ36644 | turquoise |
| FLJ42393 | turquoise |
| FLJ45513 | turquoise |
| FLJ90757 | turquoise |
| FLRT1    | turquoise |
| FMNL1    | turquoise |
| FMNL2    | turquoise |
| FMO5     | turquoise |
| FMR1     | turquoise |
| FN3K     | turquoise |
| FNBP1L   | turquoise |
| FNDC3A   | turquoise |
| FNDC3B   | turquoise |
| FNIP1    | turquoise |
| FNTA     | turquoise |
| FOLR2    | turquoise |
| FOPNL    | turquoise |
| FOXH1    | turquoise |
| FOXN2    | turquoise |
| FOXRED1  | turquoise |
| FPGT     | turquoise |
| FRA10AC1 | turquoise |
| FRG1     | turquoise |
| FRMD8    | turquoise |
| FRRS1    | turquoise |
| FRS2     | turquoise |
| FSD1L    | turquoise |
| FTSJ1    | turquoise |
| FTSJD1   | turquoise |
| FUCA1    | turquoise |
| FUNDC2   | turquoise |
| FUT4     | turquoise |
| FXR1     | turquoise |
| FXR2     | turquoise |
| FXYD5    | turquoise |
| FXYD7    | turquoise |
| FYTTD1   | turquoise |
| FZD2     | turquoise |
| FZD3     | turquoise |
| FZD6     | turquoise |
| G2E3     | turquoise |
| G6PC3    | turquoise |
| GAA      | turquoise |
| GAB1     | turquoise |
| GABPA    | turquoise |
| GABPB1   | turquoise |
| GAK      | turquoise |
| GALC     | turquoise |

|            |           |
|------------|-----------|
| GALE       | turquoise |
| GALNT1     | turquoise |
| GALNT3     | turquoise |
| GALNT4     | turquoise |
| GALNT7     | turquoise |
| GAPDH      | turquoise |
| GAPT       | turquoise |
| GAS2       | turquoise |
| GAS2L2     | turquoise |
| GAS5       | turquoise |
| GAS6       | turquoise |
| GATAD2A    | turquoise |
| GBA2       | turquoise |
| GBAS       | turquoise |
| GBP1P1     | turquoise |
| GBP3       | turquoise |
| GBP6       | turquoise |
| GCA        | turquoise |
| GCC2       | turquoise |
| GCCFC1     | turquoise |
| GCCFC1-AS1 | turquoise |
| GCH1       | turquoise |
| GCLM       | turquoise |
| GCNT1      | turquoise |
| GCNT2      | turquoise |
| GCNT4      | turquoise |
| GCSH       | turquoise |
| GDAP1L1    | turquoise |
| GDF9       | turquoise |
| GDI1       | turquoise |
| GDPD3      | turquoise |
| GDPD5      | turquoise |
| GEMIN2     | turquoise |
| GEMIN6     | turquoise |
| GEN1       | turquoise |
| GFM2       | turquoise |
| GFPT1      | turquoise |
| GFRA2      | turquoise |
| GGCT       | turquoise |
| GGPS1      | turquoise |
| GIF        | turquoise |
| GIMAP2     | turquoise |
| GIMAP7     | turquoise |
| GIN1       | turquoise |
| GIPC1      | turquoise |
| GIT1       | turquoise |
| GK         | turquoise |
| GKAP1      | turquoise |
| GLA        | turquoise |
| GLB1L3     | turquoise |
| GLCCI1     | turquoise |
| GLCE       | turquoise |
| GLRX       | turquoise |
| GLRX2      | turquoise |
| GLRX3      | turquoise |
| GLS        | turquoise |
| GLT25D1    | turquoise |
| GLT8D1     | turquoise |
| GLT8D2     | turquoise |
| GLTPD1     | turquoise |
| GLTSCR1    | turquoise |
| GMCL1      | turquoise |
| GMFB       | turquoise |
| GMNN       | turquoise |
| GMPPA      | turquoise |
| GNA13      | turquoise |
| GNAI1      | turquoise |
| GNAO1      | turquoise |

|         |           |
|---------|-----------|
| GNB4    | turquoise |
| GNG2    | turquoise |
| GNL1    | turquoise |
| GNL3    | turquoise |
| GNMT    | turquoise |
| GNPDA2  | turquoise |
| GNRHR2  | turquoise |
| GOLGA4  | turquoise |
| GOLPH3L | turquoise |
| GOLT1B  | turquoise |
| GOPC    | turquoise |
| GORAB   | turquoise |
| GORASP1 | turquoise |
| GPAM    | turquoise |
| GPAT2   | turquoise |
| GPATCH2 | turquoise |
| GPATCH3 | turquoise |
| GPBAR1  | turquoise |
| GPBP1   | turquoise |
| GPC1    | turquoise |
| GPCPD1  | turquoise |
| GPD2    | turquoise |
| GPI     | turquoise |
| GPKOW   | turquoise |
| GPR124  | turquoise |
| GPR132  | turquoise |
| GPR137  | turquoise |
| GPR15   | turquoise |
| GPR160  | turquoise |
| GPR171  | turquoise |
| GPR174  | turquoise |
| GPR180  | turquoise |
| GPR34   | turquoise |
| GPR35   | turquoise |
| GPR65   | turquoise |
| GPR82   | turquoise |
| GPRIN3  | turquoise |
| GPS1    | turquoise |
| GPS2    | turquoise |
| GPSM1   | turquoise |
| GRAMD1A | turquoise |
| GRAMD1C | turquoise |
| GRAMD3  | turquoise |
| GRAP    | turquoise |
| GRHL1   | turquoise |
| GRHPR   | turquoise |
| GRIK5   | turquoise |
| GRINL1A | turquoise |
| GRIP1   | turquoise |
| GRK6    | turquoise |
| GRPEL2  | turquoise |
| GRWD1   | turquoise |
| GSS     | turquoise |
| GSTM2   | turquoise |
| GSTP1   | turquoise |
| GTDC1   | turquoise |
| GTF2B   | turquoise |
| GTF2E1  | turquoise |
| GTF2E2  | turquoise |
| GTF2F2  | turquoise |
| GTF2H1  | turquoise |
| GTF2H4  | turquoise |
| GTPBP10 | turquoise |
| GTPBP2  | turquoise |
| GTPBP8  | turquoise |
| GUCA1B  | turquoise |
| GUCY2C  | turquoise |
| GUF1    | turquoise |

|          |           |
|----------|-----------|
| GUSB     | turquoise |
| GXYLT1   | turquoise |
| GZF1     | turquoise |
| H2AFV    | turquoise |
| H2AFZ    | turquoise |
| HACE1    | turquoise |
| HARS2    | turquoise |
| HAT1     | turquoise |
| HAUS1    | turquoise |
| HAUS3    | turquoise |
| HAUS6    | turquoise |
| HAUS7    | turquoise |
| HBS1L    | turquoise |
| HCFC2    | turquoise |
| HCG11    | turquoise |
| HCG25    | turquoise |
| HCP5     | turquoise |
| HDAC3    | turquoise |
| HDAC5    | turquoise |
| HDAC6    | turquoise |
| HDAC7    | turquoise |
| HDAC8    | turquoise |
| HDAC9    | turquoise |
| HDGFRP2  | turquoise |
| HDGFRP3  | turquoise |
| HDHD2    | turquoise |
| HDX      | turquoise |
| HEATR5A  | turquoise |
| HEBP1    | turquoise |
| HECTD2   | turquoise |
| HECTD3   | turquoise |
| HECW2    | turquoise |
| HELLS    | turquoise |
| HEPH     | turquoise |
| HERC4    | turquoise |
| HEXA     | turquoise |
| HGS      | turquoise |
| HHLA3    | turquoise |
| HIGD1A   | turquoise |
| HINT1    | turquoise |
| HINT3    | turquoise |
| HIRA     | turquoise |
| HIRIP3   | turquoise |
| HIST1H3E | turquoise |
| HIST1H4H | turquoise |
| HLA-A    | turquoise |
| HLA-DMA  | turquoise |
| HLA-DPB1 | turquoise |
| HLA-DRA  | turquoise |
| HLF      | turquoise |
| HLTF     | turquoise |
| HMGB1    | turquoise |
| HMGB2    | turquoise |
| HMGCL    | turquoise |
| HMGCS1   | turquoise |
| HMGNS    | turquoise |
| HMGXB4   | turquoise |
| HMMR     | turquoise |
| HMOX2    | turquoise |
| HNF1A    | turquoise |
| HNMT     | turquoise |
| HNRNPH2  | turquoise |
| HNRNPL   | turquoise |
| HNRPLL   | turquoise |
| HOMER1   | turquoise |
| HOOK1    | turquoise |
| HOOK2    | turquoise |
| HORMAD1  | turquoise |

|          |           |
|----------|-----------|
| HPCAL1   | turquoise |
| HPGD     | turquoise |
| HPRT1    | turquoise |
| HPS6     | turquoise |
| HRS12    | turquoise |
| HS1BP3   | turquoise |
| HS2ST1   | turquoise |
| HS6ST1   | turquoise |
| HSD17B10 | turquoise |
| HSD17B11 | turquoise |
| HSDL1    | turquoise |
| HSDL2    | turquoise |
| HSF1     | turquoise |
| HSF2     | turquoise |
| HSF4     | turquoise |
| HSF5     | turquoise |
| HSH2D    | turquoise |
| HSPA13   | turquoise |
| HSPA14   | turquoise |
| HSPB11   | turquoise |
| HSPBP1   | turquoise |
| HSPC159  | turquoise |
| HSP1     | turquoise |
| HTR7P1   | turquoise |
| HVCN1    | turquoise |
| IAH1     | turquoise |
| IBTK     | turquoise |
| ICAM2    | turquoise |
| ICAM4    | turquoise |
| ICK      | turquoise |
| IDE      | turquoise |
| IDH2     | turquoise |
| IDH3B    | turquoise |
| IDH3G    | turquoise |
| IDI1     | turquoise |
| IDI2-AS1 | turquoise |
| IER3IP1  | turquoise |
| IFI30    | turquoise |
| IFITM1   | turquoise |
| IFNGR1   | turquoise |
| IFRD1    | turquoise |
| IFT122   | turquoise |
| IFT140   | turquoise |
| IFT20    | turquoise |
| IFT52    | turquoise |
| IFT57    | turquoise |
| IFT74    | turquoise |
| IFT80    | turquoise |
| IFT81    | turquoise |
| IFT88    | turquoise |
| IGBP1    | turquoise |
| IGF2BP3  | turquoise |
| IGFALS   | turquoise |
| IGFBP4   | turquoise |
| IGHMBP2  | turquoise |
| IGJ      | turquoise |
| IGSF9    | turquoise |
| IKBKG    | turquoise |
| IKZF2    | turquoise |
| IKZF5    | turquoise |
| IL12A    | turquoise |
| IL12RB1  | turquoise |
| IL15     | turquoise |
| IL17RE   | turquoise |
| IL17REL  | turquoise |
| IL18R1   | turquoise |
| IL1RAP   | turquoise |
| IL27RA   | turquoise |

|          |           |
|----------|-----------|
| IL32     | turquoise |
| IL3RA    | turquoise |
| IL4I1    | turquoise |
| IL6ST    | turquoise |
| IL7      | turquoise |
| IL8      | turquoise |
| ILK      | turquoise |
| IMMP1L   | turquoise |
| IMPA1    | turquoise |
| IMPACT   | turquoise |
| IMPAD1   | turquoise |
| IMPDH2   | turquoise |
| IMPG2    | turquoise |
| INF2     | turquoise |
| ING3     | turquoise |
| INO80C   | turquoise |
| INO80D   | turquoise |
| INPP5D   | turquoise |
| INPP5K   | turquoise |
| INSIG1   | turquoise |
| INSIG2   | turquoise |
| INTS12   | turquoise |
| INTS2    | turquoise |
| INTS5    | turquoise |
| INTS6    | turquoise |
| INTS8    | turquoise |
| IPMK     | turquoise |
| IPO11    | turquoise |
| IPO13    | turquoise |
| IPO4     | turquoise |
| IPW      | turquoise |
| IQCG     | turquoise |
| IQSEC2   | turquoise |
| IRAK1BP1 | turquoise |
| IREB2    | turquoise |
| IRF2BP2  | turquoise |
| IRF5     | turquoise |
| ISCA1    | turquoise |
| ISPD     | turquoise |
| ITCH     | turquoise |
| ITFG3    | turquoise |
| ITGA1    | turquoise |
| ITGA2    | turquoise |
| ITGA3    | turquoise |
| ITGA4    | turquoise |
| ITGAV    | turquoise |
| ITGB3BP  | turquoise |
| ITGB7    | turquoise |
| ITIH4    | turquoise |
| ITPKC    | turquoise |
| ITPR2    | turquoise |
| IVNS1ABP | turquoise |
| JAG1     | turquoise |
| JAK2     | turquoise |
| JKAMP    | turquoise |
| JMJD6    | turquoise |
| JMY      | turquoise |
| JPX      | turquoise |
| JRKL     | turquoise |
| JUN      | turquoise |
| JUP      | turquoise |
| KAT2B    | turquoise |
| KAT8     | turquoise |
| KATNB1   | turquoise |
| KBTD2    | turquoise |
| KBTD3    | turquoise |
| KBTD6    | turquoise |
| KBTD7    | turquoise |

|            |           |
|------------|-----------|
| KBTBD8     | turquoise |
| KCNA2      | turquoise |
| KCNAB1     | turquoise |
| KCNAB2     | turquoise |
| KCNIP4     | turquoise |
| KCNJ2      | turquoise |
| KCNK7      | turquoise |
| KCNQ1      | turquoise |
| KCNT1      | turquoise |
| KCTD11     | turquoise |
| KCTD12     | turquoise |
| KCTD18     | turquoise |
| KCTD2      | turquoise |
| KCTD3      | turquoise |
| KCTD6      | turquoise |
| KCTD9      | turquoise |
| KDELC2     | turquoise |
| KEAP1      | turquoise |
| KIAA0020   | turquoise |
| KIAA0101   | turquoise |
| KIAA0195   | turquoise |
| KIAA0284   | turquoise |
| KIAA0391   | turquoise |
| KIAA0649   | turquoise |
| KIAA0664L3 | turquoise |
| KIAA0776   | turquoise |
| KIAA0825   | turquoise |
| KIAA0930   | turquoise |
| KIAA1009   | turquoise |
| KIAA1024   | turquoise |
| KIAA1033   | turquoise |
| KIAA1107   | turquoise |
| KIAA1109   | turquoise |
| KIAA1143   | turquoise |
| KIAA1370   | turquoise |
| KIAA1377   | turquoise |
| KIAA1383   | turquoise |
| KIAA1430   | turquoise |
| KIAA1467   | turquoise |
| KIAA1468   | turquoise |
| KIAA1522   | turquoise |
| KIAA1524   | turquoise |
| KIAA1543   | turquoise |
| KIAA1586   | turquoise |
| KIAA1683   | turquoise |
| KIAA1704   | turquoise |
| KIAA1715   | turquoise |
| KIAA1731   | turquoise |
| KIAA1804   | turquoise |
| KIAA1826   | turquoise |
| KIAA1841   | turquoise |
| KIAA1967   | turquoise |
| KIAA2013   | turquoise |
| KIF11      | turquoise |
| KIF18A     | turquoise |
| KIF20B     | turquoise |
| KIF22      | turquoise |
| KIF23      | turquoise |
| KIF27      | turquoise |
| KIF2A      | turquoise |
| KIF3A      | turquoise |
| KIF5B      | turquoise |
| KIFC1      | turquoise |
| KIFC3      | turquoise |
| KIN        | turquoise |
| KL         | turquoise |
| KLC4       | turquoise |
| KLF16      | turquoise |

|          |           |
|----------|-----------|
| KLF3     | turquoise |
| KLF5     | turquoise |
| KLHDC1   | turquoise |
| KLHDC10  | turquoise |
| KLHDC3   | turquoise |
| KLHDC4   | turquoise |
| KLHDC5   | turquoise |
| KLHL15   | turquoise |
| KLHL2    | turquoise |
| KLHL20   | turquoise |
| KLHL22   | turquoise |
| KLHL24   | turquoise |
| KLHL25   | turquoise |
| KLHL26   | turquoise |
| KLHL28   | turquoise |
| KLHL5    | turquoise |
| KLHL7    | turquoise |
| KLHL9    | turquoise |
| KLLN     | turquoise |
| KLRAP1   | turquoise |
| KMO      | turquoise |
| KNDC1    | turquoise |
| KPNA2    | turquoise |
| KPNA3    | turquoise |
| KPNA5    | turquoise |
| KRAS     | turquoise |
| KRCC1    | turquoise |
| KRI1     | turquoise |
| KRR1     | turquoise |
| KRT72    | turquoise |
| KTN1     | turquoise |
| L2HGDH   | turquoise |
| LACC1    | turquoise |
| LACE1    | turquoise |
| LACTB2   | turquoise |
| LAMB2    | turquoise |
| LAMB3    | turquoise |
| LAMTOR3  | turquoise |
| LANCL1   | turquoise |
| LAPTM4A  | turquoise |
| LARP1B   | turquoise |
| LARP4    | turquoise |
| LCAT     | turquoise |
| LCLAT1   | turquoise |
| LCOR     | turquoise |
| LCORL    | turquoise |
| LDLR     | turquoise |
| LDOC1    | turquoise |
| LEMD3    | turquoise |
| LENG1    | turquoise |
| LEPR     | turquoise |
| LEPREL4  | turquoise |
| LEPROT   | turquoise |
| LEPROTL1 | turquoise |
| LFNG     | turquoise |
| LGALS3BP | turquoise |
| LGALS9   | turquoise |
| LGALS9C  | turquoise |
| LGI4     | turquoise |
| LGR4     | turquoise |
| LHPP     | turquoise |
| LIG4     | turquoise |
| LILRB4   | turquoise |
| LIMS1    | turquoise |
| LIN28A   | turquoise |
| LIN52    | turquoise |
| LIN54    | turquoise |
| LIN7A    | turquoise |



|              |           |
|--------------|-----------|
| LIN7C        | turquoise |
| LIN9         | turquoise |
| LINS         | turquoise |
| LIPE         | turquoise |
| LIPN         | turquoise |
| LLGL1        | turquoise |
| LMAN1        | turquoise |
| LMAN2        | turquoise |
| LMBR1        | turquoise |
| LMBRD1       | turquoise |
| LMBRD2       | turquoise |
| LMNA         | turquoise |
| LMNB2        | turquoise |
| LNK1         | turquoise |
| LNK2         | turquoise |
| LOC100127983 | turquoise |
| LOC100128420 | turquoise |
| LOC100129361 | turquoise |
| LOC100130557 | turquoise |
| LOC100130581 | turquoise |
| LOC100130776 | turquoise |
| LOC100130855 | turquoise |
| LOC100130992 | turquoise |
| LOC100131496 | turquoise |
| LOC100132215 | turquoise |
| LOC100132618 | turquoise |
| LOC100132891 | turquoise |
| LOC100133331 | turquoise |
| LOC100134015 | turquoise |
| LOC100190939 | turquoise |
| LOC100287616 | turquoise |
| LOC100287765 | turquoise |
| LOC100288198 | turquoise |
| LOC100288846 | turquoise |
| LOC100294145 | turquoise |
| LOC100499484 | turquoise |
| LOC100505576 | turquoise |
| LOC100505624 | turquoise |
| LOC100505715 | turquoise |
| LOC100505812 | turquoise |
| LOC100505876 | turquoise |
| LOC100506710 | turquoise |
| LOC100506804 | turquoise |
| LOC100506866 | turquoise |
| LOC100507053 | turquoise |
| LOC100507254 | turquoise |
| LOC100507266 | turquoise |
| LOC100507331 | turquoise |
| LOC100507489 | turquoise |
| LOC100507557 | turquoise |
| LOC100507582 | turquoise |
| LOC100507632 | turquoise |
| LOC115110    | turquoise |
| LOC146880    | turquoise |
| LOC147646    | turquoise |
| LOC148824    | turquoise |
| LOC153684    | turquoise |
| LOC158572    | turquoise |
| LOC162632    | turquoise |
| LOC200772    | turquoise |
| LOC220906    | turquoise |
| LOC221710    | turquoise |
| LOC254559    | turquoise |
| LOC283038    | turquoise |
| LOC283875    | turquoise |
| LOC284023    | turquoise |
| LOC284233    | turquoise |
| LOC284576    | turquoise |

|           |           |
|-----------|-----------|
| LOC284837 | turquoise |
| LOC339874 | turquoise |
| LOC344595 | turquoise |
| LOC387646 | turquoise |
| LOC389634 | turquoise |
| LOC401093 | turquoise |
| LOC401397 | turquoise |
| LOC440354 | turquoise |
| LOC606724 | turquoise |
| LOC643529 | turquoise |
| LOC643723 | turquoise |
| LOC643802 | turquoise |
| LOC643837 | turquoise |
| LOC645158 | turquoise |
| LOC646214 | turquoise |
| LOC647979 | turquoise |
| LOC728024 | turquoise |
| LOC728392 | turquoise |
| LOC729178 | turquoise |
| LOC729852 | turquoise |
| LONP1     | turquoise |
| LONRF1    | turquoise |
| LOX       | turquoise |
| LPAR2     | turquoise |
| LPAR6     | turquoise |
| LPCAT1    | turquoise |
| LPCAT2    | turquoise |
| LPCAT4    | turquoise |
| LPGAT1    | turquoise |
| LRCH4     | turquoise |
| LRFN3     | turquoise |
| LRIF1     | turquoise |
| LRMP      | turquoise |
| LRP12     | turquoise |
| LRP6      | turquoise |
| LRPAP1    | turquoise |
| LRR1      | turquoise |
| LRRC20    | turquoise |
| LRRC33    | turquoise |
| LRRC34    | turquoise |
| LRRC40    | turquoise |
| LRRC43    | turquoise |
| LRRC47    | turquoise |
| LRRC58    | turquoise |
| LRRC61    | turquoise |
| LRRC70    | turquoise |
| LRRC8B    | turquoise |
| LRRC8C    | turquoise |
| LRRCC1    | turquoise |
| LRRK2     | turquoise |
| LRRN1     | turquoise |
| LRRN3     | turquoise |
| LRSAM1    | turquoise |
| LRWD1     | turquoise |
| LSM1      | turquoise |
| LSM11     | turquoise |
| LSM3      | turquoise |
| LSM6      | turquoise |
| LSR       | turquoise |
| LTN1      | turquoise |
| LUC7L3    | turquoise |
| LXN       | turquoise |
| LY6G6C    | turquoise |
| LY75      | turquoise |
| LYAR      | turquoise |
| LYNX1     | turquoise |
| LYPD3     | turquoise |
| LYPLA1    | turquoise |

|          |           |
|----------|-----------|
| LYPLA2   | turquoise |
| LYPLAL1  | turquoise |
| LYRM2    | turquoise |
| LYRM5    | turquoise |
| LYSMD3   | turquoise |
| LYST     | turquoise |
| LZIC     | turquoise |
| LZTFL1   | turquoise |
| MAD2L1   | turquoise |
| MAF      | turquoise |
| MAF1     | turquoise |
| MAGT1    | turquoise |
| MAK16    | turquoise |
| MALT1    | turquoise |
| MAMSTR   | turquoise |
| MAN1A1   | turquoise |
| MAN1A2   | turquoise |
| MAN2A1   | turquoise |
| MAN2B1   | turquoise |
| MAN2C1   | turquoise |
| MANEA    | turquoise |
| MAP2K2   | turquoise |
| MAP2K4   | turquoise |
| MAP2K5   | turquoise |
| MAP3K1   | turquoise |
| MAP3K11  | turquoise |
| MAP3K13  | turquoise |
| MAP3K14  | turquoise |
| MAP3K2   | turquoise |
| MAP3K7   | turquoise |
| MAP3K8   | turquoise |
| MAP4K1   | turquoise |
| MAP4K3   | turquoise |
| MAP4K5   | turquoise |
| MAP6D1   | turquoise |
| MAP7D2   | turquoise |
| MAP9     | turquoise |
| MAPK6    | turquoise |
| MAPK8    | turquoise |
| MAPK8IP1 | turquoise |
| MAPK8IP2 | turquoise |
| MAPKAPK2 | turquoise |
| MAPKAPK3 | turquoise |
| MAPKBP1  | turquoise |
| MARCKSL1 | turquoise |
| MARK4    | turquoise |
| MARS2    | turquoise |
| MAST2    | turquoise |
| MAST4    | turquoise |
| MATR3    | turquoise |
| MB21D2   | turquoise |
| MBIP     | turquoise |
| MBLAC2   | turquoise |
| MBNL1    | turquoise |
| MBNL2    | turquoise |
| MBOAT1   | turquoise |
| MBTD1    | turquoise |
| MBTPS2   | turquoise |
| MCAT     | turquoise |
| MCEE     | turquoise |
| MCF2     | turquoise |
| MCL1     | turquoise |
| MCM5     | turquoise |
| MCM9     | turquoise |
| MCOLN1   | turquoise |
| MCOLN3   | turquoise |
| MCTP1    | turquoise |
| MCTS1    | turquoise |

|          |           |
|----------|-----------|
| MCU      | turquoise |
| MDFIC    | turquoise |
| MDH2     | turquoise |
| MDK      | turquoise |
| MDM1     | turquoise |
| MDM2     | turquoise |
| MED12L   | turquoise |
| MED13    | turquoise |
| MED14    | turquoise |
| MED15    | turquoise |
| MED16    | turquoise |
| MED21    | turquoise |
| MED22    | turquoise |
| MED23    | turquoise |
| MED26    | turquoise |
| MED28    | turquoise |
| MED4     | turquoise |
| MED7     | turquoise |
| MED8     | turquoise |
| MED9     | turquoise |
| MEF2A    | turquoise |
| MEF2C    | turquoise |
| MEF2D    | turquoise |
| MEGF8    | turquoise |
| MEN1     | turquoise |
| MEPCE    | turquoise |
| METAP2   | turquoise |
| METTL1   | turquoise |
| METTL14  | turquoise |
| METTL15  | turquoise |
| METTL18  | turquoise |
| METTL19  | turquoise |
| METTL21D | turquoise |
| METTL4   | turquoise |
| MEX3C    | turquoise |
| MFAP3    | turquoise |
| MFF      | turquoise |
| MFN1     | turquoise |
| MFSD4    | turquoise |
| MFSD5    | turquoise |
| MFSD8    | turquoise |
| MGAT1    | turquoise |
| MGAT2    | turquoise |
| MGAT4A   | turquoise |
| MGEA5    | turquoise |
| MIB1     | turquoise |
| MICAL1   | turquoise |
| MICALL1  | turquoise |
| MICALL2  | turquoise |
| MID1IP1  | turquoise |
| MIER1    | turquoise |
| MIER2    | turquoise |
| MIER3    | turquoise |
| MINA     | turquoise |
| MINPP1   | turquoise |
| MIR155HG | turquoise |
| MIS18BP1 | turquoise |
| MITD1    | turquoise |
| MITF     | turquoise |
| MKI67IP  | turquoise |
| MKKS     | turquoise |
| MKLN1    | turquoise |
| MKRN2    | turquoise |
| MKRN3    | turquoise |
| MKS1     | turquoise |
| MLF1IP   | turquoise |
| MLLT3    | turquoise |
| MLLT4    | turquoise |

|          |           |
|----------|-----------|
| MLYCD    | turquoise |
| MMAA     | turquoise |
| MMP15    | turquoise |
| MMP17    | turquoise |
| MMP24    | turquoise |
| MMS22L   | turquoise |
| MNAT1    | turquoise |
| MNDA     | turquoise |
| MOBKL1A  | turquoise |
| MOBKL1B  | turquoise |
| MOBKL2C  | turquoise |
| MOCS2    | turquoise |
| MOCS3    | turquoise |
| MON1A    | turquoise |
| MON2     | turquoise |
| MORC2    | turquoise |
| MORC3    | turquoise |
| MORF4L2  | turquoise |
| MORN2    | turquoise |
| MORN3    | turquoise |
| MOSPD1   | turquoise |
| MOSPD2   | turquoise |
| MOV10    | turquoise |
| MPHOSPH6 | turquoise |
| MPI      | turquoise |
| MPND     | turquoise |
| MPP5     | turquoise |
| MPP6     | turquoise |
| MPP7     | turquoise |
| MPV17    | turquoise |
| MPZL2    | turquoise |
| MRFAP1   | turquoise |
| MRGPRX3  | turquoise |
| MRM1     | turquoise |
| MRPL1    | turquoise |
| MRPL13   | turquoise |
| MRPL15   | turquoise |
| MRPL18   | turquoise |
| MRPL19   | turquoise |
| MRPL2    | turquoise |
| MRPL22   | turquoise |
| MRPL28   | turquoise |
| MRPL3    | turquoise |
| MRPL32   | turquoise |
| MRPL37   | turquoise |
| MRPL39   | turquoise |
| MRPL40   | turquoise |
| MRPL42   | turquoise |
| MRPL47   | turquoise |
| MRPL48   | turquoise |
| MRPL50   | turquoise |
| MRPS10   | turquoise |
| MRPS17   | turquoise |
| MRPS18B  | turquoise |
| MRPS18C  | turquoise |
| MRPS2    | turquoise |
| MRPS22   | turquoise |
| MRPS28   | turquoise |
| MRPS31   | turquoise |
| MRPS33   | turquoise |
| MSH2     | turquoise |
| MSL2     | turquoise |
| MSL3     | turquoise |
| MSR1     | turquoise |
| MST4     | turquoise |
| MSTO1    | turquoise |
| MTBP     | turquoise |
| MTERF    | turquoise |

|         |           |
|---------|-----------|
| MTERFD1 | turquoise |
| MTF2    | turquoise |
| MTFR1   | turquoise |
| MTHFD2  | turquoise |
| MTHFD2L | turquoise |
| MTHFSD  | turquoise |
| MTIF3   | turquoise |
| MTMR2   | turquoise |
| MTMR6   | turquoise |
| MTMR7   | turquoise |
| MTMR9   | turquoise |
| MTO1    | turquoise |
| MTRF1   | turquoise |
| MTRF1L  | turquoise |
| MTRR    | turquoise |
| MTX2    | turquoise |
| MTX3    | turquoise |
| MUC1    | turquoise |
| MUC20   | turquoise |
| MUC5B   | turquoise |
| MUC6    | turquoise |
| MUDENG  | turquoise |
| MUM1    | turquoise |
| MUSTN1  | turquoise |
| MYCBPAP | turquoise |
| MYL12B  | turquoise |
| MYLK4   | turquoise |
| MYNN    | turquoise |
| MYO1G   | turquoise |
| MYO5C   | turquoise |
| MYSM1   | turquoise |
| MZT1    | turquoise |
| N4BP2   | turquoise |
| N4BP2L1 | turquoise |
| N4BP2L2 | turquoise |
| NAA16   | turquoise |
| NAA20   | turquoise |
| NAA25   | turquoise |
| NAA30   | turquoise |
| NAA38   | turquoise |
| NAA50   | turquoise |
| NAA60   | turquoise |
| NAALAD2 | turquoise |
| NAB1    | turquoise |
| NACAD   | turquoise |
| NADKD1  | turquoise |
| NADSYN1 | turquoise |
| NAGPA   | turquoise |
| NAIF1   | turquoise |
| NAMPT   | turquoise |
| NANP    | turquoise |
| NANS    | turquoise |
| NAP1L2  | turquoise |
| NAPB    | turquoise |
| NAPEPLD | turquoise |
| NAPG    | turquoise |
| NARG2   | turquoise |
| NARS2   | turquoise |
| NAT1    | turquoise |
| NBEA    | turquoise |
| NBL1    | turquoise |
| NBN     | turquoise |
| NBPF14  | turquoise |
| NCDN    | turquoise |
| NCK1    | turquoise |
| NCKAP1  | turquoise |
| NCKAP5L | turquoise |
| NCKIPSD | turquoise |

|            |           |
|------------|-----------|
| NCLN       | turquoise |
| NCOA4      | turquoise |
| NCOA7      | turquoise |
| NCRNA00188 | turquoise |
| NCRNA00189 | turquoise |
| NCRNA00201 | turquoise |
| NCRNA00239 | turquoise |
| NCRNA00247 | turquoise |
| NCRNA00264 | turquoise |
| NCRNA00265 | turquoise |
| NCS1       | turquoise |
| NDE1       | turquoise |
| NDFIP1     | turquoise |
| NDFIP2     | turquoise |
| NDN        | turquoise |
| NDRG2      | turquoise |
| NDUFA1     | turquoise |
| NDUFA4     | turquoise |
| NDUFA5     | turquoise |
| NDUFA6     | turquoise |
| NDUFAF1    | turquoise |
| NDUFAF2    | turquoise |
| NDUFB1     | turquoise |
| NDUFB3     | turquoise |
| NDUFB5     | turquoise |
| NDUFS2     | turquoise |
| NDUFS4     | turquoise |
| NDUFS5     | turquoise |
| NECAP1     | turquoise |
| NECAP2     | turquoise |
| NEDD1      | turquoise |
| NEDD4      | turquoise |
| NEGR1      | turquoise |
| NEK1       | turquoise |
| NEK7       | turquoise |
| NEMF       | turquoise |
| NETO2      | turquoise |
| NFASC      | turquoise |
| NFATC1     | turquoise |
| NFIA       | turquoise |
| NFKB2      | turquoise |
| NFKBIB     | turquoise |
| NFKBIE     | turquoise |
| NFKBIZ     | turquoise |
| NFU1       | turquoise |
| NFXL1      | turquoise |
| NFYB       | turquoise |
| NGLY1      | turquoise |
| NHLRC2     | turquoise |
| NHS        | turquoise |
| NIF3L1     | turquoise |
| NIN        | turquoise |
| NIPA1      | turquoise |
| NIPSNAP1   | turquoise |
| NIPSNAP3B  | turquoise |
| NKIRAS1    | turquoise |
| NKRF       | turquoise |
| NLGN3      | turquoise |
| NLK        | turquoise |
| NMD3       | turquoise |
| NME7       | turquoise |
| NOC2L      | turquoise |
| NOC3L      | turquoise |
| NOC4L      | turquoise |
| NOL6       | turquoise |
| NOMO1      | turquoise |
| NOP2       | turquoise |
| NOP56      | turquoise |

|          |           |
|----------|-----------|
| NOP58    | turquoise |
| NOS3     | turquoise |
| NOTCH3   | turquoise |
| NPFF     | turquoise |
| NPHP3    | turquoise |
| NPIPL3   | turquoise |
| NPLOC4   | turquoise |
| NPPA     | turquoise |
| NPPA-AS1 | turquoise |
| NPTXR    | turquoise |
| NQO1     | turquoise |
| NR1D2    | turquoise |
| NR1H2    | turquoise |
| NR3C1    | turquoise |
| NR4A1    | turquoise |
| NR4A3    | turquoise |
| NRAS     | turquoise |
| NRG4     | turquoise |
| NRIP1    | turquoise |
| NRM      | turquoise |
| NRN1     | turquoise |
| NRSN2    | turquoise |
| NSA2     | turquoise |
| NSL1     | turquoise |
| NSMAF    | turquoise |
| NSMCE2   | turquoise |
| NSUN3    | turquoise |
| NT5C3    | turquoise |
| NT5DC1   | turquoise |
| NT5DC2   | turquoise |
| NT5DC3   | turquoise |
| NTN3     | turquoise |
| NTN5     | turquoise |
| NUBP1    | turquoise |
| NUBPL    | turquoise |
| NUCB2    | turquoise |
| NUDC     | turquoise |
| NUDCD1   | turquoise |
| NUDCD2   | turquoise |
| NUDCD3   | turquoise |
| NUDT12   | turquoise |
| NUDT16   | turquoise |
| NUDT21   | turquoise |
| NUDT9P1  | turquoise |
| NUF2     | turquoise |
| NUFIP2   | turquoise |
| NUP37    | turquoise |
| NUP54    | turquoise |
| NUP62CL  | turquoise |
| NUP85    | turquoise |
| NUS1     | turquoise |
| NXT2     | turquoise |
| OAF      | turquoise |
| OBFC2A   | turquoise |
| OCEL1    | turquoise |
| OCIAD1   | turquoise |
| ODF2L    | turquoise |
| ODZ1     | turquoise |
| OGFR     | turquoise |
| OGFRL1   | turquoise |
| OIP5     | turquoise |
| OLA1     | turquoise |
| OLFM2    | turquoise |
| OMA1     | turquoise |
| OPA1     | turquoise |
| OPN3     | turquoise |
| OPRL1    | turquoise |
| OR52N4   | turquoise |



|         |           |
|---------|-----------|
| ORAI1   | turquoise |
| ORC2    | turquoise |
| ORC3    | turquoise |
| ORC4    | turquoise |
| OSBPL5  | turquoise |
| OSBPL7  | turquoise |
| OSBPL8  | turquoise |
| OSCAR   | turquoise |
| OSGEPL1 | turquoise |
| OSGIN2  | turquoise |
| OSTC    | turquoise |
| OSTM1   | turquoise |
| OTUD4   | turquoise |
| OTUD5   | turquoise |
| OTUD6B  | turquoise |
| OXCT1   | turquoise |
| OXR1    | turquoise |
| OXSM    | turquoise |
| P2RX4   | turquoise |
| P2RY10  | turquoise |
| P2RY11  | turquoise |
| P2RY12  | turquoise |
| P2RY13  | turquoise |
| P2RY14  | turquoise |
| P4HA1   | turquoise |
| P4HB    | turquoise |
| PA2G4P4 | turquoise |
| PACRGL  | turquoise |
| PACS2   | turquoise |
| PAG1    | turquoise |
| PAIP1   | turquoise |
| PAIP2   | turquoise |
| PAK1IP1 | turquoise |
| PAK4    | turquoise |
| PAN3    | turquoise |
| PANK1   | turquoise |
| PANK3   | turquoise |
| PAPD4   | turquoise |
| PAPD5   | turquoise |
| PAPOLA  | turquoise |
| PAPOLG  | turquoise |
| PAQR3   | turquoise |
| PAQR4   | turquoise |
| PAQR7   | turquoise |
| PAQR8   | turquoise |
| PARD6B  | turquoise |
| PARK2   | turquoise |
| PARP11  | turquoise |
| PARP16  | turquoise |
| PARP8   | turquoise |
| PART1   | turquoise |
| PARVB   | turquoise |
| PARVG   | turquoise |
| PAX2    | turquoise |
| PAX6    | turquoise |
| PBK     | turquoise |
| PBX3    | turquoise |
| PBXIP1  | turquoise |
| PC      | turquoise |
| PCDH11Y | turquoise |
| PCDH12  | turquoise |
| PCF11   | turquoise |
| PCGF5   | turquoise |
| PCGF6   | turquoise |
| PCK2    | turquoise |
| PCMT1   | turquoise |
| PCMTD1  | turquoise |
| PCMTD2  | turquoise |

|          |           |
|----------|-----------|
| PCNP     | turquoise |
| PDAP1    | turquoise |
| PDCD10   | turquoise |
| PDCD1LG2 | turquoise |
| PDCD2    | turquoise |
| PDCD6IP  | turquoise |
| PDE1B    | turquoise |
| PDE3B    | turquoise |
| PDE4A    | turquoise |
| PDE4D    | turquoise |
| PDE7A    | turquoise |
| PDHX     | turquoise |
| PDIA3P   | turquoise |
| PDIK1L   | turquoise |
| PDK1     | turquoise |
| PDK2     | turquoise |
| PDLIM2   | turquoise |
| PDLIM5   | turquoise |
| PDP1     | turquoise |
| PDS5B    | turquoise |
| PDSS1    | turquoise |
| PDXK     | turquoise |
| PEF1     | turquoise |
| PELI1    | turquoise |
| PELI3    | turquoise |
| PELP1    | turquoise |
| PEPD     | turquoise |
| PES1     | turquoise |
| PEX1     | turquoise |
| PEX11A   | turquoise |
| PEX11G   | turquoise |
| PEX12    | turquoise |
| PEX13    | turquoise |
| PEX14    | turquoise |
| PEX2     | turquoise |
| PEX3     | turquoise |
| PFDN4    | turquoise |
| PFDN5    | turquoise |
| PFKL     | turquoise |
| PFKM     | turquoise |
| PFN1     | turquoise |
| PFN2     | turquoise |
| PGAM5    | turquoise |
| PGAP1    | turquoise |
| PGAP3    | turquoise |
| PGBD4    | turquoise |
| PGGT1B   | turquoise |
| PGM2L1   | turquoise |
| PGM3     | turquoise |
| PHAX     | turquoise |
| PHC3     | turquoise |
| PHF17    | turquoise |
| PHF20L1  | turquoise |
| PHF5A    | turquoise |
| PHF6     | turquoise |
| PHF7     | turquoise |
| PHGDH    | turquoise |
| PHIP     | turquoise |
| PHKG2    | turquoise |
| PHLDB1   | turquoise |
| PHLDB3   | turquoise |
| PHOX2A   | turquoise |
| PHTF1    | turquoise |
| PHTF2    | turquoise |
| PI4K2B   | turquoise |
| PIAS4    | turquoise |
| PIBF1    | turquoise |
| PIGA     | turquoise |

|         |           |
|---------|-----------|
| PIGB    | turquoise |
| PIGF    | turquoise |
| PIGK    | turquoise |
| PIGM    | turquoise |
| PIGS    | turquoise |
| PIGW    | turquoise |
| PIGY    | turquoise |
| PIGZ    | turquoise |
| PIK3AP1 | turquoise |
| PIK3C2A | turquoise |
| PIK3CA  | turquoise |
| PIKFYVE | turquoise |
| PIN4    | turquoise |
| PION    | turquoise |
| PITPNM1 | turquoise |
| PIWIL4  | turquoise |
| PJA2    | turquoise |
| PKD2    | turquoise |
| PKIA    | turquoise |
| PKIB    | turquoise |
| PKN1    | turquoise |
| PKN2    | turquoise |
| PLA2G15 | turquoise |
| PLA2G4A | turquoise |
| PLAG1   | turquoise |
| PLAGL1  | turquoise |
| PLCB1   | turquoise |
| PLCB2   | turquoise |
| PLCB3   | turquoise |
| PLCD3   | turquoise |
| PLCL1   | turquoise |
| PLCXD2  | turquoise |
| PLD2    | turquoise |
| PLD3    | turquoise |
| PLD4    | turquoise |
| PLDN    | turquoise |
| PLEKHA1 | turquoise |
| PLEKHA3 | turquoise |
| PLEKHA6 | turquoise |
| PLEKHA8 | turquoise |
| PLEKHB1 | turquoise |
| PLEKHF2 | turquoise |
| PLEKHG3 | turquoise |
| PLEKHH2 | turquoise |
| PLEKHH3 | turquoise |
| PLEKHM1 | turquoise |
| PLEKHM2 | turquoise |
| PLK1S1  | turquoise |
| PLK4    | turquoise |
| PLOD3   | turquoise |
| PLRG1   | turquoise |
| PLS1    | turquoise |
| PLXNB1  | turquoise |
| PLXNB2  | turquoise |
| PM20D2  | turquoise |
| PMAIP1  | turquoise |
| PMF1    | turquoise |
| PMPCA   | turquoise |
| PMS1    | turquoise |
| PNISR   | turquoise |
| PNKD    | turquoise |
| PNMA3   | turquoise |
| PNPLA2  | turquoise |
| PNPLA6  | turquoise |
| PNPLA7  | turquoise |
| PNPLA8  | turquoise |
| PNRC2   | turquoise |
| POC1B   | turquoise |

|             |           |
|-------------|-----------|
| PODNL1      | turquoise |
| PODXL       | turquoise |
| POGLUT1     | turquoise |
| POLD2       | turquoise |
| POLDIP2     | turquoise |
| POLG2       | turquoise |
| POLI        | turquoise |
| POLK        | turquoise |
| POLQ        | turquoise |
| POLR1E      | turquoise |
| POLR2E      | turquoise |
| POLR2K      | turquoise |
| POLR3D      | turquoise |
| POLR3G      | turquoise |
| POLR3H      | turquoise |
| POMT2       | turquoise |
| PORCN       | turquoise |
| POT1        | turquoise |
| PPA1        | turquoise |
| PPAN-P2RY11 | turquoise |
| PPAT        | turquoise |
| PPDPF       | turquoise |
| PPEF1       | turquoise |
| PPFIA3      | turquoise |
| PPIB        | turquoise |
| PPIF        | turquoise |
| PPIG        | turquoise |
| PPIL3       | turquoise |
| PPIL4       | turquoise |
| PPIP5K2     | turquoise |
| PPM1B       | turquoise |
| PPM1G       | turquoise |
| PPP1CA      | turquoise |
| PPP1CB      | turquoise |
| PPP1CC      | turquoise |
| PPP1R12A    | turquoise |
| PPP1R13L    | turquoise |
| PPP1R15A    | turquoise |
| PPP1R15B    | turquoise |
| PPP1R2      | turquoise |
| PPP1R3D     | turquoise |
| PPP1R7      | turquoise |
| PPP2CB      | turquoise |
| PPP2R1A     | turquoise |
| PPP2R2A     | turquoise |
| PPP2R3A     | turquoise |
| PPP2R3C     | turquoise |
| PPP2R4      | turquoise |
| PPP2R5A     | turquoise |
| PPP2R5B     | turquoise |
| PPP2R5D     | turquoise |
| PPP2R5E     | turquoise |
| PPP3CA      | turquoise |
| PPP3CB      | turquoise |
| PPP4C       | turquoise |
| PPP4R1L     | turquoise |
| PPP4R2      | turquoise |
| PPP4R4      | turquoise |
| PPP5C       | turquoise |
| PPP6C       | turquoise |
| PPP6R1      | turquoise |
| PPP6R3      | turquoise |
| PPPDE1      | turquoise |
| PPPDE2      | turquoise |
| PPWD1       | turquoise |
| PQBP1       | turquoise |
| PQLC2       | turquoise |
| PQLC3       | turquoise |

|          |           |
|----------|-----------|
| PRCC     | turquoise |
| PRDM10   | turquoise |
| PRDM5    | turquoise |
| PRDX2    | turquoise |
| PRDX3    | turquoise |
| PREPL    | turquoise |
| PRICKLE3 | turquoise |
| PRKAA1   | turquoise |
| PRKAB2   | turquoise |
| PRKACB   | turquoise |
| PRKAG2   | turquoise |
| PRKAR1A  | turquoise |
| PRKAR1B  | turquoise |
| PRKCI    | turquoise |
| PRKCSH   | turquoise |
| PRKCZ    | turquoise |
| PRKD3    | turquoise |
| PRKRIR   | turquoise |
| PRMT1    | turquoise |
| PRMT10   | turquoise |
| PRMT3    | turquoise |
| PROC     | turquoise |
| PROCA1   | turquoise |
| PROM2    | turquoise |
| PROZ     | turquoise |
| PRPF18   | turquoise |
| PRPF31   | turquoise |
| PRPF38B  | turquoise |
| PRPF39   | turquoise |
| PRPF40A  | turquoise |
| PRPF4B   | turquoise |
| PRPF6    | turquoise |
| PRPS2    | turquoise |
| PRPSAP1  | turquoise |
| PRR14    | turquoise |
| PRRC1    | turquoise |
| PRSS50   | turquoise |
| PRSS8    | turquoise |
| PRTFDC1  | turquoise |
| PRX      | turquoise |
| PSEN2    | turquoise |
| PSIP1    | turquoise |
| PSKH1    | turquoise |
| PSMA1    | turquoise |
| PSMA2    | turquoise |
| PSMA3    | turquoise |
| PSMA4    | turquoise |
| PSMA6    | turquoise |
| PSMA8    | turquoise |
| PSMB1    | turquoise |
| PSMB3    | turquoise |
| PSMC1    | turquoise |
| PSMC2    | turquoise |
| PSMC3    | turquoise |
| PSMC5    | turquoise |
| PSMC6    | turquoise |
| PSMD10   | turquoise |
| PSMD13   | turquoise |
| PSMD14   | turquoise |
| PSMD4    | turquoise |
| PSMD8    | turquoise |
| PSME1    | turquoise |
| PSMG1    | turquoise |
| PSMG4    | turquoise |
| PSTPIP1  | turquoise |
| PTAR1    | turquoise |
| PTBP2    | turquoise |
| PTCHD2   | turquoise |

|           |           |
|-----------|-----------|
| PTEN      | turquoise |
| PTER      | turquoise |
| PTGDS     | turquoise |
| PTGER4    | turquoise |
| PTGIR     | turquoise |
| PTGR1     | turquoise |
| PTGR2     | turquoise |
| PTGS2     | turquoise |
| PTH2R     | turquoise |
| PTK6      | turquoise |
| PTK7      | turquoise |
| PTMS      | turquoise |
| PTOV1     | turquoise |
| PTP4A1    | turquoise |
| PTPDC1    | turquoise |
| PTPLAD1   | turquoise |
| PTPLAD2   | turquoise |
| PTPN12    | turquoise |
| PTPN2     | turquoise |
| PTPN22    | turquoise |
| PTPN23    | turquoise |
| PTPN4     | turquoise |
| PTPN7     | turquoise |
| PTPRO     | turquoise |
| PTPRVP    | turquoise |
| PTRH2     | turquoise |
| PTS       | turquoise |
| PUF60     | turquoise |
| PUM2      | turquoise |
| PURA      | turquoise |
| PURB      | turquoise |
| PUS10     | turquoise |
| PUS7L     | turquoise |
| PVRL3     | turquoise |
| PWP2      | turquoise |
| PWWP2A    | turquoise |
| PXT1      | turquoise |
| PYCR2     | turquoise |
| PYROXD1   | turquoise |
| QDPR      | turquoise |
| QKI       | turquoise |
| QPRT      | turquoise |
| QRICH2    | turquoise |
| QSER1     | turquoise |
| RAB10     | turquoise |
| RAB11B    | turquoise |
| RAB11FIP2 | turquoise |
| RAB12     | turquoise |
| RAB14     | turquoise |
| RAB18     | turquoise |
| RAB1B     | turquoise |
| RAB22A    | turquoise |
| RAB27B    | turquoise |
| RAB28     | turquoise |
| RAB2A     | turquoise |
| RAB2B     | turquoise |
| RAB33B    | turquoise |
| RAB37     | turquoise |
| RAB39B    | turquoise |
| RAB3GAP2  | turquoise |
| RAB3IP    | turquoise |
| RAB4A     | turquoise |
| RAB5A     | turquoise |
| RAB6A     | turquoise |
| RAB8B     | turquoise |
| RAB9B     | turquoise |
| RABEP1    | turquoise |
| RABL3     | turquoise |

|           |           |
|-----------|-----------|
| RAD17     | turquoise |
| RAD23A    | turquoise |
| RAD51AP1  | turquoise |
| RAD51B    | turquoise |
| RAD51C    | turquoise |
| RAE1      | turquoise |
| RALA      | turquoise |
| RALGPS2   | turquoise |
| RALY      | turquoise |
| RANBP3    | turquoise |
| RANBP6    | turquoise |
| RANGAP1   | turquoise |
| RAP1A     | turquoise |
| RAP1B     | turquoise |
| RAP2A     | turquoise |
| RAP2C     | turquoise |
| RAPGEF6   | turquoise |
| RAPSN     | turquoise |
| RARG      | turquoise |
| RARS2     | turquoise |
| RASA1     | turquoise |
| RASL11A   | turquoise |
| RASSF1    | turquoise |
| RASSF4    | turquoise |
| RB1       | turquoise |
| RB1CC1    | turquoise |
| RBAK      | turquoise |
| RBBP6     | turquoise |
| RBBP8     | turquoise |
| RBBP9     | turquoise |
| RBCK1     | turquoise |
| RBFOX3    | turquoise |
| RBKS      | turquoise |
| RBM10     | turquoise |
| RBM11     | turquoise |
| RBM12B    | turquoise |
| RBM15     | turquoise |
| RBM18     | turquoise |
| RBM25     | turquoise |
| RBM26-AS1 | turquoise |
| RBM27     | turquoise |
| RBM3      | turquoise |
| RBM34     | turquoise |
| RBM39     | turquoise |
| RBM4      | turquoise |
| RBM41     | turquoise |
| RBM42     | turquoise |
| RBM43     | turquoise |
| RBM44     | turquoise |
| RBM47     | turquoise |
| RBM5      | turquoise |
| RBM7      | turquoise |
| RBMS1     | turquoise |
| RBX1      | turquoise |
| RCBTB1    | turquoise |
| RCBTB2    | turquoise |
| RCHY1     | turquoise |
| RCN2      | turquoise |
| RCN3      | turquoise |
| RCOR3     | turquoise |
| RCVRN     | turquoise |
| RDBP      | turquoise |
| RDH10     | turquoise |
| RDX       | turquoise |
| RECQL     | turquoise |
| RECQL5    | turquoise |
| REEP3     | turquoise |
| REEP4     | turquoise |

|          |           |
|----------|-----------|
| REEP5    | turquoise |
| RELB     | turquoise |
| RENBP    | turquoise |
| RER1     | turquoise |
| REST     | turquoise |
| RET      | turquoise |
| REV1     | turquoise |
| REV3L    | turquoise |
| REXO4    | turquoise |
| RFC2     | turquoise |
| RFC3     | turquoise |
| RFC5     | turquoise |
| RFK      | turquoise |
| RFNG     | turquoise |
| RFWD2    | turquoise |
| RFX7     | turquoise |
| RFXAP    | turquoise |
| RG9MTD1  | turquoise |
| RG9MTD2  | turquoise |
| RGS1     | turquoise |
| RGS12    | turquoise |
| RGS18    | turquoise |
| RGS5     | turquoise |
| RHBDD2   | turquoise |
| RHEB     | turquoise |
| RHOBTB3  | turquoise |
| RHOQ     | turquoise |
| RHOT1    | turquoise |
| RHOU     | turquoise |
| RHPN2    | turquoise |
| RIC8A    | turquoise |
| RIC8B    | turquoise |
| RICTOR   | turquoise |
| RIF1     | turquoise |
| RIMKLA   | turquoise |
| RIMKLB   | turquoise |
| RIN1     | turquoise |
| RING1    | turquoise |
| RINT1    | turquoise |
| RIOK2    | turquoise |
| RIPK2    | turquoise |
| RIPK3    | turquoise |
| RIT1     | turquoise |
| RLF      | turquoise |
| RLN1     | turquoise |
| RLN2     | turquoise |
| RMI1     | turquoise |
| RMND1    | turquoise |
| RMND5B   | turquoise |
| RNASEH2A | turquoise |
| RNF103   | turquoise |
| RNF11    | turquoise |
| RNF121   | turquoise |
| RNF123   | turquoise |
| RNF13    | turquoise |
| RNF135   | turquoise |
| RNF138   | turquoise |
| RNF139   | turquoise |
| RNF141   | turquoise |
| RNF144B  | turquoise |
| RNF146   | turquoise |
| RNF187   | turquoise |
| RNF19A   | turquoise |
| RNF2     | turquoise |
| RNF217   | turquoise |
| RNF219   | turquoise |
| RNF220   | turquoise |
| RNF26    | turquoise |



|           |           |
|-----------|-----------|
| RNF31     | turquoise |
| RNF38     | turquoise |
| RNF40     | turquoise |
| RNF6      | turquoise |
| RNF7      | turquoise |
| RNFT1     | turquoise |
| RNGTT     | turquoise |
| RNH1      | turquoise |
| RNLS      | turquoise |
| RNPC3     | turquoise |
| RNPEPL1   | turquoise |
| ROCK1     | turquoise |
| RORA      | turquoise |
| RORC      | turquoise |
| RP2       | turquoise |
| RPAP2     | turquoise |
| RPAP3     | turquoise |
| RPE       | turquoise |
| RPF1      | turquoise |
| RPF2      | turquoise |
| RPGR      | turquoise |
| RPH3AL    | turquoise |
| RPL11     | turquoise |
| RPL15     | turquoise |
| RPL17     | turquoise |
| RPL22L1   | turquoise |
| RPL23     | turquoise |
| RPL23AP53 | turquoise |
| RPL23AP82 | turquoise |
| RPL26     | turquoise |
| RPL26L1   | turquoise |
| RPL27     | turquoise |
| RPL30     | turquoise |
| RPL31     | turquoise |
| RPL31P11  | turquoise |
| RPL34     | turquoise |
| RPL35     | turquoise |
| RPL36A    | turquoise |
| RPL36AL   | turquoise |
| RPL39     | turquoise |
| RPL39L    | turquoise |
| RPL41     | turquoise |
| RPL7      | turquoise |
| RPL9      | turquoise |
| RPRD1A    | turquoise |
| RPS15A    | turquoise |
| RPS24     | turquoise |
| RPS27     | turquoise |
| RPS27L    | turquoise |
| RPS29     | turquoise |
| RPS3A     | turquoise |
| RPS6KA3   | turquoise |
| RPS6KA4   | turquoise |
| RPS6KA5   | turquoise |
| RPS6KB1   | turquoise |
| RPS7      | turquoise |
| RPTOR     | turquoise |
| RPUSD2    | turquoise |
| RRM2B     | turquoise |
| RRNAD1    | turquoise |
| RRP1      | turquoise |
| RRP36     | turquoise |
| RRP7A     | turquoise |
| RRP8      | turquoise |
| RRS1      | turquoise |
| RSBN1     | turquoise |
| RSBN1L    | turquoise |
| RSG1      | turquoise |

|         |           |
|---------|-----------|
| RSL24D1 | turquoise |
| RSPH4A  | turquoise |
| RSPH6A  | turquoise |
| RSPRY1  | turquoise |
| RSRC2   | turquoise |
| RTKN    | turquoise |
| RTKN2   | turquoise |
| RUFY2   | turquoise |
| RUFY3   | turquoise |
| RUNDC3B | turquoise |
| RUVBL2  | turquoise |
| RWDD1   | turquoise |
| RWDD2A  | turquoise |
| RWDD3   | turquoise |
| RWDD4   | turquoise |
| RXFP2   | turquoise |
| RXR8    | turquoise |
| RYBP    | turquoise |
| RYK     | turquoise |
| RYR1    | turquoise |
| RYR3    | turquoise |
| S100A10 | turquoise |
| S100A4  | turquoise |
| S100P   | turquoise |
| S1PR2   | turquoise |
| SACM1L  | turquoise |
| SACS    | turquoise |
| SAFB    | turquoise |
| SAFB2   | turquoise |
| SAMD8   | turquoise |
| SAMD9   | turquoise |
| SAMSN1  | turquoise |
| SAP25   | turquoise |
| SAP30BP | turquoise |
| SAR1A   | turquoise |
| SAR1B   | turquoise |
| SARNP   | turquoise |
| SART1   | turquoise |
| SASH3   | turquoise |
| SASS6   | turquoise |
| SAT1    | turquoise |
| SC5DL   | turquoise |
| SCAF11  | turquoise |
| SCAI    | turquoise |
| SCAMP1  | turquoise |
| SCAMP3  | turquoise |
| SCAP    | turquoise |
| SCARB1  | turquoise |
| SCFD1   | turquoise |
| SCLT1   | turquoise |
| SCML1   | turquoise |
| SCN3A   | turquoise |
| SCN5A   | turquoise |
| SCN9A   | turquoise |
| SCOC    | turquoise |
| SCP2    | turquoise |
| SCRN3   | turquoise |
| SCUBE1  | turquoise |
| SCYL1   | turquoise |
| SCYL2   | turquoise |
| SCYL3   | turquoise |
| SDF4    | turquoise |
| SDHD    | turquoise |
| SDR42E1 | turquoise |
| SEC1    | turquoise |
| SEC11A  | turquoise |
| SEC11C  | turquoise |
| SEC13   | turquoise |

|             |           |
|-------------|-----------|
| SEC23A      | turquoise |
| SEC24A      | turquoise |
| SEC61A1     | turquoise |
| SEC62       | turquoise |
| SECISBP2L   | turquoise |
| SEL1L       | turquoise |
| SELK        | turquoise |
| SELT        | turquoise |
| SEMA3A      | turquoise |
| SEMA3C      | turquoise |
| SEMA4F      | turquoise |
| SEMA6C      | turquoise |
| SENP1       | turquoise |
| SENP6       | turquoise |
| SENP7       | turquoise |
| SEPSECS     | turquoise |
| SEPT5-GP1BB | turquoise |
| SERAC1      | turquoise |
| SERINC1     | turquoise |
| SERP1       | turquoise |
| SERPINB10   | turquoise |
| SERPINH1    | turquoise |
| SERPINI1    | turquoise |
| SESN1       | turquoise |
| SESTD1      | turquoise |
| SETDB2      | turquoise |
| SF3A1       | turquoise |
| SF3A2       | turquoise |
| SF3B1       | turquoise |
| SF3B14      | turquoise |
| SFR1        | turquoise |
| SFSWAP      | turquoise |
| SFTPD       | turquoise |
| SFXN4       | turquoise |
| SGCB        | turquoise |
| SGMS1       | turquoise |
| SGMS2       | turquoise |
| SGOL2       | turquoise |
| SGPP1       | turquoise |
| SGTA        | turquoise |
| SGTB        | turquoise |
| SH3BGRL     | turquoise |
| SH3BGRL3    | turquoise |
| SH3BP1      | turquoise |
| SH3BP2      | turquoise |
| SH3GL1      | turquoise |
| SH3TC1      | turquoise |
| SHB         | turquoise |
| SHFM1       | turquoise |
| SHMT2       | turquoise |
| SHOC2       | turquoise |
| SIAH1       | turquoise |
| SIGLEC16    | turquoise |
| SIKE1       | turquoise |
| SIL1        | turquoise |
| SIPA1       | turquoise |
| SIRT1       | turquoise |
| SIRT2       | turquoise |
| SKA2        | turquoise |
| SKAP2       | turquoise |
| SKIL        | turquoise |
| SKIV2L      | turquoise |
| SKIV2L2     | turquoise |
| SKP2        | turquoise |
| SLAIN1      | turquoise |
| SLAIN2      | turquoise |
| SLC10A3     | turquoise |
| SLC10A7     | turquoise |

|            |           |
|------------|-----------|
| SLC12A2    | turquoise |
| SLC12A5    | turquoise |
| SLC12A7    | turquoise |
| SLC12A9    | turquoise |
| SLC16A10   | turquoise |
| SLC16A13   | turquoise |
| SLC16A14   | turquoise |
| SLC16A6    | turquoise |
| SLC16A7    | turquoise |
| SLC17A5    | turquoise |
| SLC18A2    | turquoise |
| SLC19A2    | turquoise |
| SLC20A1    | turquoise |
| SLC22A15   | turquoise |
| SLC22A18   | turquoise |
| SLC22A18AS | turquoise |
| SLC24A6    | turquoise |
| SLC25A1    | turquoise |
| SLC25A10   | turquoise |
| SLC25A11   | turquoise |
| SLC25A22   | turquoise |
| SLC25A24   | turquoise |
| SLC25A3    | turquoise |
| SLC25A32   | turquoise |
| SLC25A34   | turquoise |
| SLC25A36   | turquoise |
| SLC25A38   | turquoise |
| SLC25A40   | turquoise |
| SLC25A43   | turquoise |
| SLC25A46   | turquoise |
| SLC26A2    | turquoise |
| SLC26A6    | turquoise |
| SLC27A1    | turquoise |
| SLC27A3    | turquoise |
| SLC27A4    | turquoise |
| SLC29A3    | turquoise |
| SLC29A4    | turquoise |
| SLC2A12    | turquoise |
| SLC2A13    | turquoise |
| SLC2A6     | turquoise |
| SLC2A9     | turquoise |
| SLC30A1    | turquoise |
| SLC30A5    | turquoise |
| SLC30A6    | turquoise |
| SLC30A7    | turquoise |
| SLC30A9    | turquoise |
| SLC33A1    | turquoise |
| SLC35A1    | turquoise |
| SLC35A3    | turquoise |
| SLC35A4    | turquoise |
| SLC35A5    | turquoise |
| SLC35B3    | turquoise |
| SLC35B4    | turquoise |
| SLC35C1    | turquoise |
| SLC35C2    | turquoise |
| SLC35E4    | turquoise |
| SLC35F5    | turquoise |
| SLC35G1    | turquoise |
| SLC36A4    | turquoise |
| SLC37A3    | turquoise |
| SLC38A10   | turquoise |
| SLC38A2    | turquoise |
| SLC38A9    | turquoise |
| SLC39A10   | turquoise |
| SLC39A7    | turquoise |
| SLC39A8    | turquoise |
| SLC3A2     | turquoise |
| SLC40A1    | turquoise |

|          |           |
|----------|-----------|
| SLC41A2  | turquoise |
| SLC43A1  | turquoise |
| SLC44A3  | turquoise |
| SLC46A3  | turquoise |
| SLC4A10  | turquoise |
| SLC4A11  | turquoise |
| SLC4A2   | turquoise |
| SLC4A7   | turquoise |
| SLC5A3   | turquoise |
| SLC5A6   | turquoise |
| SLC7A11  | turquoise |
| SLC7A8   | turquoise |
| SLC9A3R1 | turquoise |
| SLC9A3R2 | turquoise |
| SLC9A6   | turquoise |
| SLC9B1   | turquoise |
| SLCO4C1  | turquoise |
| SLFN12   | turquoise |
| SLIT1    | turquoise |
| SLK      | turquoise |
| SLMAP    | turquoise |
| SLMO2    | turquoise |
| SLU7     | turquoise |
| SMAD2    | turquoise |
| SMAD4    | turquoise |
| SMAD5    | turquoise |
| SMARCA1  | turquoise |
| SMARCA5  | turquoise |
| SMARCAD1 | turquoise |
| SMARCB1  | turquoise |
| SMC2     | turquoise |
| SMC4     | turquoise |
| SMC5     | turquoise |
| SMC6     | turquoise |
| SMCHD1   | turquoise |
| SMEK1    | turquoise |
| SMEK2    | turquoise |
| SMG1     | turquoise |
| SMG5     | turquoise |
| SMG9     | turquoise |
| SMNDC1   | turquoise |
| SMPD1    | turquoise |
| SMPD4    | turquoise |
| SMPDL3A  | turquoise |
| SMTN     | turquoise |
| SMURF2   | turquoise |
| SMYD2    | turquoise |
| SNAPC1   | turquoise |
| SNORA31  | turquoise |
| SNORA32  | turquoise |
| SNORA8   | turquoise |
| SNRK     | turquoise |
| SNRNP27  | turquoise |
| SNRNP35  | turquoise |
| SNRNP48  | turquoise |
| SNRPB    | turquoise |
| SNRPB2   | turquoise |
| SNRPD1   | turquoise |
| SNRPE    | turquoise |
| SNRPG    | turquoise |
| SNTB1    | turquoise |
| SNX10    | turquoise |
| SNX13    | turquoise |
| SNX14    | turquoise |
| SNX16    | turquoise |
| SNX17    | turquoise |
| SNX18    | turquoise |
| SNX2     | turquoise |

|          |           |
|----------|-----------|
| SNX21    | turquoise |
| SNX25    | turquoise |
| SNX3     | turquoise |
| SNX32    | turquoise |
| SNX4     | turquoise |
| SNX8     | turquoise |
| SOCS4    | turquoise |
| SOCS5    | turquoise |
| SOCS6    | turquoise |
| SORBS3   | turquoise |
| SP3      | turquoise |
| SP4      | turquoise |
| SPA17    | turquoise |
| SPAG16   | turquoise |
| SPAG5    | turquoise |
| SPAG9    | turquoise |
| SPAST    | turquoise |
| SPATA6   | turquoise |
| SPCS2    | turquoise |
| SPCS3    | turquoise |
| SPEF2    | turquoise |
| SPHAR    | turquoise |
| SPIN3    | turquoise |
| SPIN4    | turquoise |
| SPINT2   | turquoise |
| SPIRE2   | turquoise |
| SPNS1    | turquoise |
| SPOPL    | turquoise |
| SPR      | turquoise |
| SPRYD3   | turquoise |
| SPTBN2   | turquoise |
| SPTBN5   | turquoise |
| SPTLC1   | turquoise |
| SPTS5A   | turquoise |
| SPTY2D1  | turquoise |
| SRD5A1   | turquoise |
| SREBF1   | turquoise |
| SREK1    | turquoise |
| SREK1IP1 | turquoise |
| SRM      | turquoise |
| SRP14    | turquoise |
| SRP19    | turquoise |
| SRP9     | turquoise |
| SRSF10   | turquoise |
| SRSF11   | turquoise |
| SRSF3    | turquoise |
| SRSF6    | turquoise |
| SRSF8    | turquoise |
| SS18     | turquoise |
| SS18L1   | turquoise |
| SS18L2   | turquoise |
| SSFA2    | turquoise |
| SSPN     | turquoise |
| SSPO     | turquoise |
| SSR3     | turquoise |
| SSSCA1   | turquoise |
| SSU72    | turquoise |
| SSX2IP   | turquoise |
| ST18     | turquoise |
| ST5      | turquoise |
| ST7L     | turquoise |
| ST8SIA4  | turquoise |
| STAB1    | turquoise |
| STAC3    | turquoise |
| STAG1    | turquoise |
| STAG2    | turquoise |
| STAM2    | turquoise |
| STARD3   | turquoise |

|          |           |
|----------|-----------|
| STARD3NL | turquoise |
| STARD4   | turquoise |
| STAU2    | turquoise |
| STEAP2   | turquoise |
| STEAP4   | turquoise |
| STK10    | turquoise |
| STK11IP  | turquoise |
| STK17A   | turquoise |
| STK17B   | turquoise |
| STK32C   | turquoise |
| STK38L   | turquoise |
| STOM     | turquoise |
| STON1    | turquoise |
| STRADA   | turquoise |
| STRN3    | turquoise |
| STRN4    | turquoise |
| STT3B    | turquoise |
| STX16    | turquoise |
| STX4     | turquoise |
| STX5     | turquoise |
| STX7     | turquoise |
| STXBP2   | turquoise |
| STXBP3   | turquoise |
| STXBP4   | turquoise |
| STXBP5   | turquoise |
| STYX     | turquoise |
| STYXL1   | turquoise |
| SUB1     | turquoise |
| SUCLA2   | turquoise |
| SUCLG2   | turquoise |
| SUCNR1   | turquoise |
| SUGP1    | turquoise |
| SUGT1P3  | turquoise |
| SULT1A1  | turquoise |
| SULT1B1  | turquoise |
| SUMF2    | turquoise |
| SUMO1    | turquoise |
| SUMO1P1  | turquoise |
| SUMO2    | turquoise |
| SUMO3    | turquoise |
| SUOX     | turquoise |
| SUPT5H   | turquoise |
| SURF6    | turquoise |
| SUV39H1  | turquoise |
| SUV39H2  | turquoise |
| SUZ12    | turquoise |
| SVIP     | turquoise |
| SWT1     | turquoise |
| SYCP2    | turquoise |
| SYCP3    | turquoise |
| SYDE2    | turquoise |
| SYMPK    | turquoise |
| SYN1     | turquoise |
| SYNGR2   | turquoise |
| SYNJ1    | turquoise |
| SYP      | turquoise |
| SYTL3    | turquoise |
| TAB1     | turquoise |
| TAB2     | turquoise |
| TAB3     | turquoise |
| TACO1    | turquoise |
| TADA1    | turquoise |
| TAF12    | turquoise |
| TAF13    | turquoise |
| TAF1A    | turquoise |
| TAF1D    | turquoise |
| TAF2     | turquoise |
| TAF5     | turquoise |

|          |           |
|----------|-----------|
| TAF7     | turquoise |
| TAF9     | turquoise |
| TAF9B    | turquoise |
| TAGLN    | turquoise |
| TANK     | turquoise |
| TAOK1    | turquoise |
| TAPBPL   | turquoise |
| TARS2    | turquoise |
| TAS1R3   | turquoise |
| TAS2R14  | turquoise |
| TAS2R40  | turquoise |
| TATDN1   | turquoise |
| TATDN3   | turquoise |
| TAX1BP1  | turquoise |
| TBC1D10B | turquoise |
| TBC1D12  | turquoise |
| TBC1D13  | turquoise |
| TBC1D15  | turquoise |
| TBC1D22A | turquoise |
| TBC1D23  | turquoise |
| TBC1D25  | turquoise |
| TBC1D4   | turquoise |
| TBC1D8B  | turquoise |
| TBCA     | turquoise |
| TBCB     | turquoise |
| TBCD     | turquoise |
| TBCEL    | turquoise |
| TBK1     | turquoise |
| TBKBP1   | turquoise |
| TBL1XR1  | turquoise |
| TBPL1    | turquoise |
| TBXA2R   | turquoise |
| TC2N     | turquoise |
| TCAP     | turquoise |
| TCEA1    | turquoise |
| TCEAL3   | turquoise |
| TCEAL8   | turquoise |
| TCEANC   | turquoise |
| TCF25    | turquoise |
| TCF7L1   | turquoise |
| TCTE3    | turquoise |
| TCTEX1D2 | turquoise |
| TDG      | turquoise |
| TDP2     | turquoise |
| TDRD6    | turquoise |
| TECR     | turquoise |
| TENC1    | turquoise |
| TESK1    | turquoise |
| TESK2    | turquoise |
| TET1     | turquoise |
| TET2     | turquoise |
| TEX9     | turquoise |
| TFAM     | turquoise |
| TFAP2E   | turquoise |
| TFAP4    | turquoise |
| TFEC     | turquoise |
| TFPT     | turquoise |
| TFRC     | turquoise |
| TGDS     | turquoise |
| TGFA     | turquoise |
| TGFBR1   | turquoise |
| TGFBR2   | turquoise |
| TGM4     | turquoise |
| THAP1    | turquoise |
| THAP2    | turquoise |
| THAP4    | turquoise |
| THAP5    | turquoise |
| THAP6    | turquoise |



|          |           |
|----------|-----------|
| THAP8    | turquoise |
| THAP9    | turquoise |
| THBS2    | turquoise |
| THBS3    | turquoise |
| THEMIS   | turquoise |
| THNSL1   | turquoise |
| THOC3    | turquoise |
| THOC4    | turquoise |
| THOC7    | turquoise |
| THUMPD1  | turquoise |
| TIA1     | turquoise |
| TICAM1   | turquoise |
| TIE1     | turquoise |
| TIFA     | turquoise |
| TIGD1    | turquoise |
| TIGD2    | turquoise |
| TIGD7    | turquoise |
| TIMM17A  | turquoise |
| TIMM22   | turquoise |
| TIMM23   | turquoise |
| TIMM8B   | turquoise |
| TIMMDC1  | turquoise |
| TIMP1    | turquoise |
| TIPRL    | turquoise |
| TJAP1    | turquoise |
| TJP3     | turquoise |
| TK1      | turquoise |
| TLK1     | turquoise |
| TLR1     | turquoise |
| TLR10    | turquoise |
| TLR6     | turquoise |
| TLR8     | turquoise |
| TM2D3    | turquoise |
| TM6SF1   | turquoise |
| TM9SF3   | turquoise |
| TMBIM4   | turquoise |
| TMC4     | turquoise |
| TMCO1    | turquoise |
| TMCO4    | turquoise |
| TMED10   | turquoise |
| TMED10P1 | turquoise |
| TMED2    | turquoise |
| TMED5    | turquoise |
| TMED7    | turquoise |
| TMEM104  | turquoise |
| TMEM106B | turquoise |
| TMEM115  | turquoise |
| TMEM123  | turquoise |
| TMEM126A | turquoise |
| TMEM126B | turquoise |
| TMEM128  | turquoise |
| TMEM135  | turquoise |
| TMEM144  | turquoise |
| TMEM14B  | turquoise |
| TMEM150B | turquoise |
| TMEM161B | turquoise |
| TMEM165  | turquoise |
| TMEM167A | turquoise |
| TMEM167B | turquoise |
| TMEM168  | turquoise |
| TMEM169  | turquoise |
| TMEM170A | turquoise |
| TMEM170B | turquoise |
| TMEM173  | turquoise |
| TMEM180  | turquoise |
| TMEM181  | turquoise |
| TMEM182  | turquoise |
| TMEM183A | turquoise |

|              |           |
|--------------|-----------|
| TMEM184A     | turquoise |
| TMEM185B     | turquoise |
| TMEM188      | turquoise |
| TMEM194B     | turquoise |
| TMEM199      | turquoise |
| TMEM200A     | turquoise |
| TMEM201      | turquoise |
| TMEM204      | turquoise |
| TMEM206      | turquoise |
| TMEM209      | turquoise |
| TMEM220      | turquoise |
| TMEM221      | turquoise |
| TMEM30A      | turquoise |
| TMEM30B      | turquoise |
| TMEM33       | turquoise |
| TMEM38B      | turquoise |
| TMEM39B      | turquoise |
| TMEM48       | turquoise |
| TMEM50A      | turquoise |
| TMEM51       | turquoise |
| TMEM55A      | turquoise |
| TMEM56-RWDD3 | turquoise |
| TMEM63B      | turquoise |
| TMEM63C      | turquoise |
| TMEM64       | turquoise |
| TMEM65       | turquoise |
| TMEM66       | turquoise |
| TMEM70       | turquoise |
| TMEM71       | turquoise |
| TMEM86B      | turquoise |
| TMEM87B      | turquoise |
| TMEM8B       | turquoise |
| TMEM9B       | turquoise |
| TMF1         | turquoise |
| TMOD2        | turquoise |
| TMPO         | turquoise |
| TMPRSS13     | turquoise |
| TMPRSS6      | turquoise |
| TMTC3        | turquoise |
| TMX1         | turquoise |
| TMX3         | turquoise |
| TNFAIP6      | turquoise |
| TNFAIP8      | turquoise |
| TNFRSF10B    | turquoise |
| TNFRSF10D    | turquoise |
| TNFRSF8      | turquoise |
| TNFSF10      | turquoise |
| TNFSF13B     | turquoise |
| TNKS2        | turquoise |
| TNPO1        | turquoise |
| TOB1         | turquoise |
| TOLLIP       | turquoise |
| TOM1         | turquoise |
| TOMM20       | turquoise |
| TOMM40       | turquoise |
| TOMM5        | turquoise |
| TONSL        | turquoise |
| TOP1MT       | turquoise |
| TOPORS       | turquoise |
| TOR1A        | turquoise |
| TOX2         | turquoise |
| TP53INP1     | turquoise |
| TP63         | turquoise |
| TPI1         | turquoise |
| TPK1         | turquoise |
| TPPP3        | turquoise |
| TPRKB        | turquoise |
| TPT1         | turquoise |

|              |           |
|--------------|-----------|
| TRA2A        | turquoise |
| TRA2B        | turquoise |
| TRAF3IP2-AS1 | turquoise |
| TRAF7        | turquoise |
| TRAM1        | turquoise |
| TRAP1        | turquoise |
| TRAPPC1      | turquoise |
| TRAPPC2P1    | turquoise |
| TRAPPC6B     | turquoise |
| TRAPPC8      | turquoise |
| TRAPPC9      | turquoise |
| TRDMT1       | turquoise |
| TREX1        | turquoise |
| TRIAP1       | turquoise |
| TRIB2        | turquoise |
| TRIM11       | turquoise |
| TRIM13       | turquoise |
| TRIM2        | turquoise |
| TRIM23       | turquoise |
| TRIM28       | turquoise |
| TRIM3        | turquoise |
| TRIM33       | turquoise |
| TRIM39       | turquoise |
| TRIM41       | turquoise |
| TRIM47       | turquoise |
| TRIM52       | turquoise |
| TRIM59       | turquoise |
| TRIM6        | turquoise |
| TRIM61       | turquoise |
| TRIM72       | turquoise |
| TRIP10       | turquoise |
| TRMT12       | turquoise |
| TRMT1L       | turquoise |
| TRNT1        | turquoise |
| TROVE2       | turquoise |
| TRPC1        | turquoise |
| TRPM2        | turquoise |
| TRPM5        | turquoise |
| TRPM7        | turquoise |
| TRPV2        | turquoise |
| TRPV4        | turquoise |
| TRPV6        | turquoise |
| TRUB1        | turquoise |
| TSC2         | turquoise |
| TSC22D4      | turquoise |
| TSGA10       | turquoise |
| TSGA10IP     | turquoise |
| TSNAX        | turquoise |
| TSPAN2       | turquoise |
| TSPAN6       | turquoise |
| TSPYL4       | turquoise |
| TTC14        | turquoise |
| TTC15        | turquoise |
| TTC26        | turquoise |
| TTC30A       | turquoise |
| TTC30B       | turquoise |
| TTC32        | turquoise |
| TTC33        | turquoise |
| TTC35        | turquoise |
| TTC3P1       | turquoise |
| TTC7A        | turquoise |
| TTK          | turquoise |
| TTLL1        | turquoise |
| TTLL12       | turquoise |
| TTYH1        | turquoise |
| TUBA1B       | turquoise |
| TUBB2C       | turquoise |
| TUBD1        | turquoise |

|         |           |
|---------|-----------|
| TUBE1   | turquoise |
| TUBG1   | turquoise |
| TUBG2   | turquoise |
| TUBGCP2 | turquoise |
| TWF1    | turquoise |
| TWF2    | turquoise |
| TWISTNB | turquoise |
| TWSG1   | turquoise |
| TXLNB   | turquoise |
| TXNDC12 | turquoise |
| TXNDC16 | turquoise |
| TXNDC17 | turquoise |
| TXNDC3  | turquoise |
| TXNDC9  | turquoise |
| TXNL1   | turquoise |
| TXNL4B  | turquoise |
| TXNRD2  | turquoise |
| TYMP    | turquoise |
| TYW3    | turquoise |
| TYW5    | turquoise |
| U2AF1   | turquoise |
| U2SURP  | turquoise |
| UAP1L1  | turquoise |
| UBA2    | turquoise |
| UBA3    | turquoise |
| UBA5    | turquoise |
| UBA6    | turquoise |
| UBASH3A | turquoise |
| UBC     | turquoise |
| UBE2A   | turquoise |
| UBE2D1  | turquoise |
| UBE2D3  | turquoise |
| UBE2E1  | turquoise |
| UBE2G1  | turquoise |
| UBE2J1  | turquoise |
| UBE2J2  | turquoise |
| UBE2K   | turquoise |
| UBE2M   | turquoise |
| UBE2N   | turquoise |
| UBE2O   | turquoise |
| UBE2Q2  | turquoise |
| UBE2T   | turquoise |
| UBE2V2  | turquoise |
| UBE2W   | turquoise |
| UBE3A   | turquoise |
| UBE4A   | turquoise |
| UBL3    | turquoise |
| UBL7    | turquoise |
| UBLCP1  | turquoise |
| UBOX5   | turquoise |
| UBR1    | turquoise |
| UBR3    | turquoise |
| UBR5    | turquoise |
| UBTD2   | turquoise |
| UBXN2B  | turquoise |
| UBXN4   | turquoise |
| UBXN8   | turquoise |
| UCHL3   | turquoise |
| UCHL5   | turquoise |
| UCP2    | turquoise |
| UCP3    | turquoise |
| UFM1    | turquoise |
| UGCG    | turquoise |
| UGDH    | turquoise |
| UGGT2   | turquoise |
| UGT2B11 | turquoise |
| UHMK1   | turquoise |
| UNC13D  | turquoise |

|        |           |
|--------|-----------|
| UNC45A | turquoise |
| UNC50  | turquoise |
| UNC5A  | turquoise |
| UPF1   | turquoise |
| UPK3A  | turquoise |
| UPK3B  | turquoise |
| UQCRB  | turquoise |
| UQCRC1 | turquoise |
| UQCRC2 | turquoise |
| UQCRH  | turquoise |
| UQCRQ  | turquoise |
| URGCP  | turquoise |
| USO1   | turquoise |
| USP1   | turquoise |
| USP12  | turquoise |
| USP14  | turquoise |
| USP15  | turquoise |
| USP16  | turquoise |
| USP19  | turquoise |
| USP21  | turquoise |
| USP25  | turquoise |
| USP31  | turquoise |
| USP37  | turquoise |
| USP38  | turquoise |
| USP44  | turquoise |
| USP45  | turquoise |
| USP46  | turquoise |
| USP5   | turquoise |
| USP51  | turquoise |
| USP53  | turquoise |
| USP6   | turquoise |
| USPL1  | turquoise |
| UTP11L | turquoise |
| UTP14C | turquoise |
| UTP15  | turquoise |
| UTP23  | turquoise |
| VAC14  | turquoise |
| VAMP4  | turquoise |
| VAMP7  | turquoise |
| VAPA   | turquoise |
| VAR5   | turquoise |
| VASH2  | turquoise |
| VBP1   | turquoise |
| VCPIP1 | turquoise |
| VEGFA  | turquoise |
| VEGFB  | turquoise |
| VENTX  | turquoise |
| VEZF1  | turquoise |
| VEZT   | turquoise |
| VMA21  | turquoise |
| VMP1   | turquoise |
| VNN1   | turquoise |
| VNN2   | turquoise |
| VPS13A | turquoise |
| VPS13C | turquoise |
| VPS18  | turquoise |
| VPS26A | turquoise |
| VPS28  | turquoise |
| VPS29  | turquoise |
| VPS33B | turquoise |
| VPS36  | turquoise |
| VPS37A | turquoise |
| VPS37B | turquoise |
| VPS4A  | turquoise |
| VPS4B  | turquoise |
| VPS54  | turquoise |
| VPS72  | turquoise |
| VRK1   | turquoise |

|         |           |
|---------|-----------|
| VRK2    | turquoise |
| VT A1   | turquoise |
| WAPAL   | turquoise |
| WARS2   | turquoise |
| WASL    | turquoise |
| WBP4    | turquoise |
| WBSCR16 | turquoise |
| WBSCR22 | turquoise |
| WDFY1   | turquoise |
| WDHD1   | turquoise |
| WDPCP   | turquoise |
| WDR1    | turquoise |
| WDR17   | turquoise |
| WDR35   | turquoise |
| WDR36   | turquoise |
| WDR41   | turquoise |
| WDR43   | turquoise |
| WDR44   | turquoise |
| WDR46   | turquoise |
| WDR47   | turquoise |
| WDR5    | turquoise |
| WDR53   | turquoise |
| WDR5B   | turquoise |
| WDR62   | turquoise |
| WDR81   | turquoise |
| WDR89   | turquoise |
| WDR91   | turquoise |
| WDTC1   | turquoise |
| WEE1    | turquoise |
| WFS1    | turquoise |
| WHAMMP2 | turquoise |
| WHSC2   | turquoise |
| WNT10A  | turquoise |
| WRAP73  | turquoise |
| WRB     | turquoise |
| WSB1    | turquoise |
| WSCD1   | turquoise |
| WTAP    | turquoise |
| WWC2    | turquoise |
| WWP1    | turquoise |
| XAB2    | turquoise |
| XIST    | turquoise |
| XPO1    | turquoise |
| XRCC1   | turquoise |
| XRCC4   | turquoise |
| XRN1    | turquoise |
| XRRA1   | turquoise |
| YAF2    | turquoise |
| YES1    | turquoise |
| YIPF2   | turquoise |
| YIPF4   | turquoise |
| YIPF6   | turquoise |
| YJEFN3  | turquoise |
| YKT6    | turquoise |
| YOD1    | turquoise |
| YPEL5   | turquoise |
| YTHDC2  | turquoise |
| YTHDF3  | turquoise |
| ZADH2   | turquoise |
| ZBED5   | turquoise |
| ZBTB1   | turquoise |
| ZBTB10  | turquoise |
| ZBTB11  | turquoise |
| ZBTB12  | turquoise |
| ZBTB2   | turquoise |
| ZBTB25  | turquoise |
| ZBTB26  | turquoise |
| ZBTB33  | turquoise |

|          |           |
|----------|-----------|
| ZBTB34   | turquoise |
| ZBTB38   | turquoise |
| ZBTB41   | turquoise |
| ZBTB43   | turquoise |
| ZBTB45   | turquoise |
| ZBTB48   | turquoise |
| ZBTB6    | turquoise |
| ZBTB7B   | turquoise |
| ZBTB80S  | turquoise |
| ZC3H10   | turquoise |
| ZC3H11A  | turquoise |
| ZC3H12C  | turquoise |
| ZC3H15   | turquoise |
| ZC3H4    | turquoise |
| ZCCHC10  | turquoise |
| ZCCHC17  | turquoise |
| ZCCHC6   | turquoise |
| ZCCHC7   | turquoise |
| ZCCHC8   | turquoise |
| ZCCHC9   | turquoise |
| ZCRB1    | turquoise |
| ZCWPW1   | turquoise |
| ZDBF2    | turquoise |
| ZDHHC13  | turquoise |
| ZDHHC14  | turquoise |
| ZDHHC16  | turquoise |
| ZDHHC17  | turquoise |
| ZDHHC2   | turquoise |
| ZDHHC20  | turquoise |
| ZDHHC21  | turquoise |
| ZDHHC6   | turquoise |
| ZEB1     | turquoise |
| ZEB1-AS1 | turquoise |
| ZFAND1   | turquoise |
| ZFAND5   | turquoise |
| ZFAND6   | turquoise |
| ZFAT     | turquoise |
| ZFC3H1   | turquoise |
| ZFP1     | turquoise |
| ZFP14    | turquoise |
| ZFP161   | turquoise |
| ZFP2     | turquoise |
| ZFP3     | turquoise |
| ZFP62    | turquoise |
| ZFP82    | turquoise |
| ZFP92    | turquoise |
| ZFR      | turquoise |
| ZFX      | turquoise |
| ZFYVE16  | turquoise |
| ZGPAT    | turquoise |
| ZHX1     | turquoise |
| ZKSCAN4  | turquoise |
| ZMAT1    | turquoise |
| ZMAT2    | turquoise |
| ZMAT3    | turquoise |
| ZMPSTE24 | turquoise |
| ZMYM1    | turquoise |
| ZMYM2    | turquoise |
| ZMYM5    | turquoise |
| ZMYM6    | turquoise |
| ZMYND11  | turquoise |
| ZNF100   | turquoise |
| ZNF107   | turquoise |
| ZNF117   | turquoise |
| ZNF12    | turquoise |
| ZNF121   | turquoise |
| ZNF124   | turquoise |
| ZNF131   | turquoise |

|         |           |
|---------|-----------|
| ZNF136  | turquoise |
| ZNF138  | turquoise |
| ZNF141  | turquoise |
| ZNF146  | turquoise |
| ZNF148  | turquoise |
| ZNF157  | turquoise |
| ZNF167  | turquoise |
| ZNF169  | turquoise |
| ZNF17   | turquoise |
| ZNF175  | turquoise |
| ZNF18   | turquoise |
| ZNF180  | turquoise |
| ZNF181  | turquoise |
| ZNF182  | turquoise |
| ZNF184  | turquoise |
| ZNF187  | turquoise |
| ZNF189  | turquoise |
| ZNF197  | turquoise |
| ZNF208  | turquoise |
| ZNF213  | turquoise |
| ZNF215  | turquoise |
| ZNF22   | turquoise |
| ZNF221  | turquoise |
| ZNF222  | turquoise |
| ZNF224  | turquoise |
| ZNF225  | turquoise |
| ZNF226  | turquoise |
| ZNF227  | turquoise |
| ZNF230  | turquoise |
| ZNF238  | turquoise |
| ZNF24   | turquoise |
| ZNF248  | turquoise |
| ZNF25   | turquoise |
| ZNF252  | turquoise |
| ZNF253  | turquoise |
| ZNF254  | turquoise |
| ZNF256  | turquoise |
| ZNF257  | turquoise |
| ZNF260  | turquoise |
| ZNF267  | turquoise |
| ZNF268  | turquoise |
| ZNF271  | turquoise |
| ZNF273  | turquoise |
| ZNF277  | turquoise |
| ZNF28   | turquoise |
| ZNF280C | turquoise |
| ZNF280D | turquoise |
| ZNF281  | turquoise |
| ZNF282  | turquoise |
| ZNF283  | turquoise |
| ZNF286A | turquoise |
| ZNF292  | turquoise |
| ZNF295  | turquoise |
| ZNF296  | turquoise |
| ZNF302  | turquoise |
| ZNF322  | turquoise |
| ZNF323  | turquoise |
| ZNF324B | turquoise |
| ZNF326  | turquoise |
| ZNF33A  | turquoise |
| ZNF33B  | turquoise |
| ZNF34   | turquoise |
| ZNF347  | turquoise |
| ZNF350  | turquoise |
| ZNF354A | turquoise |
| ZNF354B | turquoise |
| ZNF354C | turquoise |
| ZNF382  | turquoise |



|         |           |
|---------|-----------|
| ZNF384  | turquoise |
| ZNF385C | turquoise |
| ZNF391  | turquoise |
| ZNF396  | turquoise |
| ZNF408  | turquoise |
| ZNF410  | turquoise |
| ZNF415  | turquoise |
| ZNF420  | turquoise |
| ZNF429  | turquoise |
| ZNF43   | turquoise |
| ZNF430  | turquoise |
| ZNF432  | turquoise |
| ZNF434  | turquoise |
| ZNF439  | turquoise |
| ZNF441  | turquoise |
| ZNF442  | turquoise |
| ZNF443  | turquoise |
| ZNF449  | turquoise |
| ZNF451  | turquoise |
| ZNF468  | turquoise |
| ZNF470  | turquoise |
| ZNF480  | turquoise |
| ZNF484  | turquoise |
| ZNF487P | turquoise |
| ZNF493  | turquoise |
| ZNF497  | turquoise |
| ZNF507  | turquoise |
| ZNF510  | turquoise |
| ZNF518A | turquoise |
| ZNF518B | turquoise |
| ZNF519  | turquoise |
| ZNF525  | turquoise |
| ZNF526  | turquoise |
| ZNF529  | turquoise |
| ZNF546  | turquoise |
| ZNF547  | turquoise |
| ZNF554  | turquoise |
| ZNF555  | turquoise |
| ZNF558  | turquoise |
| ZNF561  | turquoise |
| ZNF566  | turquoise |
| ZNF567  | turquoise |
| ZNF570  | turquoise |
| ZNF571  | turquoise |
| ZNF572  | turquoise |
| ZNF574  | turquoise |
| ZNF583  | turquoise |
| ZNF585A | turquoise |
| ZNF586  | turquoise |
| ZNF592  | turquoise |
| ZNF594  | turquoise |
| ZNF595  | turquoise |
| ZNF597  | turquoise |
| ZNF605  | turquoise |
| ZNF606  | turquoise |
| ZNF610  | turquoise |
| ZNF613  | turquoise |
| ZNF614  | turquoise |
| ZNF615  | turquoise |
| ZNF620  | turquoise |
| ZNF622  | turquoise |
| ZNF624  | turquoise |
| ZNF627  | turquoise |
| ZNF639  | turquoise |
| ZNF642  | turquoise |
| ZNF643  | turquoise |
| ZNF644  | turquoise |
| ZNF649  | turquoise |

|         |           |
|---------|-----------|
| ZNF654  | turquoise |
| ZNF655  | turquoise |
| ZNF658  | turquoise |
| ZNF662  | turquoise |
| ZNF670  | turquoise |
| ZNF672  | turquoise |
| ZNF674  | turquoise |
| ZNF675  | turquoise |
| ZNF680  | turquoise |
| ZNF681  | turquoise |
| ZNF684  | turquoise |
| ZNF697  | turquoise |
| ZNF700  | turquoise |
| ZNF701  | turquoise |
| ZNF702P | turquoise |
| ZNF703  | turquoise |
| ZNF708  | turquoise |
| ZNF709  | turquoise |
| ZNF711  | turquoise |
| ZNF717  | turquoise |
| ZNF718  | turquoise |
| ZNF721  | turquoise |
| ZNF736  | turquoise |
| ZNF738  | turquoise |
| ZNF750  | turquoise |
| ZNF75A  | turquoise |
| ZNF75D  | turquoise |
| ZNF761  | turquoise |
| ZNF765  | turquoise |
| ZNF770  | turquoise |
| ZNF772  | turquoise |
| ZNF776  | turquoise |
| ZNF777  | turquoise |
| ZNF780A | turquoise |
| ZNF780B | turquoise |
| ZNF781  | turquoise |
| ZNF782  | turquoise |
| ZNF788  | turquoise |
| ZNF791  | turquoise |
| ZNF799  | turquoise |
| ZNF80   | turquoise |
| ZNF800  | turquoise |
| ZNF813  | turquoise |
| ZNF816  | turquoise |
| ZNF829  | turquoise |
| ZNF830  | turquoise |
| ZNF836  | turquoise |
| ZNF839  | turquoise |
| ZNF84   | turquoise |
| ZNF844  | turquoise |
| ZNF845  | turquoise |
| ZNF85   | turquoise |
| ZNF853  | turquoise |
| ZNF876P | turquoise |
| ZNF879  | turquoise |
| ZNF90   | turquoise |
| ZNF91   | turquoise |
| ZNF92   | turquoise |
| ZNF93   | turquoise |
| ZNHIT3  | turquoise |
| ZNRF1   | turquoise |
| ZNRF2   | turquoise |
| ZRANB1  | turquoise |
| ZRANB2  | turquoise |
| ZRANB3  | turquoise |
| ZSCAN12 | turquoise |
| ZSCAN5A | turquoise |
| ZSWIM4  | turquoise |

|            |              |
|------------|--------------|
| ZSWIM5     | turquoise    |
| ZUFSP      | turquoise    |
| ZWILCH     | turquoise    |
| ZXDA       | turquoise    |
| ZXDB       | turquoise    |
| ZZZ3       | turquoise    |
|            | 9-Mar yellow |
|            | 1-Sep yellow |
| A1BG       | yellow       |
| ABCB8      | yellow       |
| ABCB9      | yellow       |
| ABHD1      | yellow       |
| ABHD14A    | yellow       |
| ABT1       | yellow       |
| ACADS      | yellow       |
| ACAP3      | yellow       |
| ACBD4      | yellow       |
| ACCN3      | yellow       |
| ACCS       | yellow       |
| ACER3      | yellow       |
| ACOT8      | yellow       |
| ACP5       | yellow       |
| ACSL3      | yellow       |
| ACTR1B     | yellow       |
| ACTR3      | yellow       |
| ADAM12     | yellow       |
| ADAM9      | yellow       |
| ADAMDEC1   | yellow       |
| ADAMTS13   | yellow       |
| ADAMTSL2   | yellow       |
| ADCK5      | yellow       |
| ADHFE1     | yellow       |
| ADNP       | yellow       |
| ADORA2A    | yellow       |
| ADPRHL2    | yellow       |
| AES        | yellow       |
| AFF1       | yellow       |
| AFMID      | yellow       |
| AFTPH      | yellow       |
| AHCY       | yellow       |
| AHCYL1     | yellow       |
| AHSA2      | yellow       |
| AIM1L      | yellow       |
| AIP        | yellow       |
| AK1        | yellow       |
| AK4        | yellow       |
| AKAP10     | yellow       |
| AKR1A1     | yellow       |
| ALG12      | yellow       |
| ALKBH7     | yellow       |
| ALS2       | yellow       |
| AMDHD2     | yellow       |
| AMT        | yellow       |
| ANAPC11    | yellow       |
| ANAPC2     | yellow       |
| ANKDD1A    | yellow       |
| ANKMY1     | yellow       |
| ANKRD13B   | yellow       |
| ANKRD17    | yellow       |
| ANKRD23    | yellow       |
| ANKRD33B   | yellow       |
| ANKRD34A   | yellow       |
| ANKRD36BP1 | yellow       |
| ANKRD54    | yellow       |
| ANKS3      | yellow       |
| ANO6       | yellow       |
| ANO9       | yellow       |
| AP1G1      | yellow       |

|          |        |
|----------|--------|
| AP1G2    | yellow |
| AP1S1    | yellow |
| APBB3    | yellow |
| APOE     | yellow |
| APOM     | yellow |
| APPL2    | yellow |
| APRT     | yellow |
| ARC      | yellow |
| ARFGEF1  | yellow |
| ARFIP2   | yellow |
| ARFRP1   | yellow |
| ARHGAP4  | yellow |
| ARHGEF25 | yellow |
| ARHGEF26 | yellow |
| ARIH1    | yellow |
| ARL16    | yellow |
| ARL6IP4  | yellow |
| ARMC5    | yellow |
| ARMC6    | yellow |
| ARNTL    | yellow |
| ARRDC2   | yellow |
| ASB3     | yellow |
| ASB6     | yellow |
| ASH1L    | yellow |
| ASPCR1   | yellow |
| ASXL2    | yellow |
| ATAD3B   | yellow |
| ATF4     | yellow |
| ATF7IP   | yellow |
| ATG4D    | yellow |
| ATHL1    | yellow |
| ATL3     | yellow |
| ATP5D    | yellow |
| ATP5G2   | yellow |
| ATP5G3   | yellow |
| ATP5H    | yellow |
| ATP5SL   | yellow |
| ATP6AP2  | yellow |
| ATP6V0E2 | yellow |
| ATP6V1C1 | yellow |
| ATRIP    | yellow |
| AUP1     | yellow |
| AVEN     | yellow |
| AVP11    | yellow |
| B3GALT6  | yellow |
| B3GAT3   | yellow |
| B4GALNT4 | yellow |
| B4GALT2  | yellow |
| B4GALT7  | yellow |
| BABAM1   | yellow |
| BAI1     | yellow |
| BAIAP2L2 | yellow |
| BCL2L12  | yellow |
| BCL7B    | yellow |
| BCL7C    | yellow |
| BCS1L    | yellow |
| BEST4    | yellow |
| BHLHE41  | yellow |
| BMP2K    | yellow |
| BOK      | yellow |
| BOLA1    | yellow |
| BRAF     | yellow |
| BRAT1    | yellow |
| BRD7P3   | yellow |
| BRF1     | yellow |
| BRF2     | yellow |
| BROX     | yellow |
| BTBD6    | yellow |

|           |        |
|-----------|--------|
| BTBD7     | yellow |
| BTN1A1    | yellow |
| BTN2A1    | yellow |
| BUB1      | yellow |
| BUB1B     | yellow |
| C10orf125 | yellow |
| C10orf35  | yellow |
| C11orf30  | yellow |
| C11orf48  | yellow |
| C11orf83  | yellow |
| C12orf10  | yellow |
| C12orf44  | yellow |
| C12orf5   | yellow |
| C13orf15  | yellow |
| C14orf118 | yellow |
| C14orf80  | yellow |
| C16orf13  | yellow |
| C16orf42  | yellow |
| C16orf53  | yellow |
| C16orf55  | yellow |
| C16orf74  | yellow |
| C16orf79  | yellow |
| C16orf86  | yellow |
| C17orf109 | yellow |
| C17orf39  | yellow |
| C17orf49  | yellow |
| C17orf56  | yellow |
| C17orf59  | yellow |
| C17orf70  | yellow |
| C17orf79  | yellow |
| C17orf90  | yellow |
| C19orf10  | yellow |
| C19orf24  | yellow |
| C19orf25  | yellow |
| C19orf28  | yellow |
| C19orf39  | yellow |
| C19orf46  | yellow |
| C19orf48  | yellow |
| C19orf53  | yellow |
| C19orf57  | yellow |
| C19orf60  | yellow |
| C19orf66  | yellow |
| C19orf70  | yellow |
| C1orf122  | yellow |
| C1orf123  | yellow |
| C1orf159  | yellow |
| C1orf198  | yellow |
| C1orf212  | yellow |
| C1orf35   | yellow |
| C1orf50   | yellow |
| C1orf55   | yellow |
| C1orf86   | yellow |
| C1QBP     | yellow |
| C1QTNF6   | yellow |
| C20orf195 | yellow |
| C20orf196 | yellow |
| C20orf27  | yellow |
| C21orf2   | yellow |
| C21orf58  | yellow |
| C21orf63  | yellow |
| C22orf26  | yellow |
| C22orf34  | yellow |
| C22orf40  | yellow |
| C2orf68   | yellow |
| C2orf81   | yellow |
| C3orf47   | yellow |
| C4orf14   | yellow |
| C4orf19   | yellow |

|          |        |
|----------|--------|
| C4orf41  | yellow |
| C5orf51  | yellow |
| C6orf108 | yellow |
| C6orf226 | yellow |
| C7orf40  | yellow |
| C7orf50  | yellow |
| C7orf51  | yellow |
| C7orf59  | yellow |
| C8G      | yellow |
| C8orf55  | yellow |
| C8ORFK29 | yellow |
| C9orf100 | yellow |
| C9orf114 | yellow |
| C9orf142 | yellow |
| C9orf16  | yellow |
| C9orf173 | yellow |
| C9orf23  | yellow |
| C9orf37  | yellow |
| C9orf47  | yellow |
| C9orf64  | yellow |
| C9orf7   | yellow |
| CANX     | yellow |
| CAPN10   | yellow |
| CAPRIN1  | yellow |
| CAPS     | yellow |
| CBR1     | yellow |
| CCDC101  | yellow |
| CCDC106  | yellow |
| CCDC107  | yellow |
| CCDC114  | yellow |
| CCDC12   | yellow |
| CCDC130  | yellow |
| CCDC157  | yellow |
| CCDC22   | yellow |
| CCDC28B  | yellow |
| CCDC47   | yellow |
| CCDC48   | yellow |
| CCDC51   | yellow |
| CCDC57   | yellow |
| CCDC61   | yellow |
| CCDC78   | yellow |
| CCDC94   | yellow |
| CCHCR1   | yellow |
| CCNL2    | yellow |
| CCS      | yellow |
| CD320    | yellow |
| CD36     | yellow |
| CD38     | yellow |
| CD7      | yellow |
| CD8B     | yellow |
| CD99     | yellow |
| CDC25A   | yellow |
| CDC6     | yellow |
| CDCA8    | yellow |
| CDK10    | yellow |
| CDK12    | yellow |
| CDK13    | yellow |
| CDS2     | yellow |
| CDYL2    | yellow |
| CECR5    | yellow |
| CEL      | yellow |
| CELF2    | yellow |
| CELF6    | yellow |
| CEMP1    | yellow |
| CENPF    | yellow |
| CENPM    | yellow |
| CENPT    | yellow |
| CEP55    | yellow |

|           |        |
|-----------|--------|
| CHADL     | yellow |
| CHCHD5    | yellow |
| CHD7      | yellow |
| CHMP4A    | yellow |
| CHMP6     | yellow |
| CHRAC1    | yellow |
| CHTF18    | yellow |
| CIB1      | yellow |
| CISD3     | yellow |
| CLASP1    | yellow |
| CLCF1     | yellow |
| CLCN4     | yellow |
| CLDN7     | yellow |
| CLIP1     | yellow |
| CLPP      | yellow |
| CLSPN     | yellow |
| CN5H6.4   | yellow |
| CNO       | yellow |
| CNTLN     | yellow |
| COL11A2   | yellow |
| COL6A1    | yellow |
| COL6A2    | yellow |
| COL9A2    | yellow |
| COMMD4    | yellow |
| COMMD5    | yellow |
| COMMD9    | yellow |
| COMTD1    | yellow |
| COQ7      | yellow |
| COQ9      | yellow |
| CORO6     | yellow |
| COX4I1    | yellow |
| CPSF2     | yellow |
| CPSF3L    | yellow |
| CPSF4     | yellow |
| CPT1C     | yellow |
| CRB3      | yellow |
| CREB3     | yellow |
| CREB3L4   | yellow |
| CRELD1    | yellow |
| CRELD2    | yellow |
| CRIP1     | yellow |
| CRIP2     | yellow |
| CRYBB2P1  | yellow |
| CRYL1     | yellow |
| CSDE1     | yellow |
| CSNK1G1   | yellow |
| CTAGE5    | yellow |
| CTSC      | yellow |
| CTSF      | yellow |
| CTTNBP2NL | yellow |
| CTU2      | yellow |
| CUEDC2    | yellow |
| CUTA      | yellow |
| CXorf38   | yellow |
| CXorf40A  | yellow |
| CXorf40B  | yellow |
| CYB561D2  | yellow |
| CYB5D2    | yellow |
| CYC1      | yellow |
| CYP1B1    | yellow |
| CYP2E1    | yellow |
| DAAM1     | yellow |
| DALRD3    | yellow |
| DCBLD1    | yellow |
| DCUN1D3   | yellow |
| DCXR      | yellow |
| DDT       | yellow |
| DDX21     | yellow |

|          |        |
|----------|--------|
| DDX28    | yellow |
| DDX39A   | yellow |
| DDX43    | yellow |
| DDX49    | yellow |
| DEAF1    | yellow |
| DECR2    | yellow |
| DENND2C  | yellow |
| DERL3    | yellow |
| DGCR6    | yellow |
| DGCR6L   | yellow |
| DGUOK    | yellow |
| DHDH     | yellow |
| DHRS3    | yellow |
| DHRS4    | yellow |
| DHRS4L2  | yellow |
| DIAPH2   | yellow |
| DLGAP5   | yellow |
| DNAJC17  | yellow |
| DNAJC30  | yellow |
| DNAL4    | yellow |
| DNASE1L2 | yellow |
| DND1     | yellow |
| DNLZ     | yellow |
| DOC2GP   | yellow |
| DOK7     | yellow |
| DOLK     | yellow |
| DOM3Z    | yellow |
| DPH3P1   | yellow |
| DPM3     | yellow |
| DPP7     | yellow |
| DPP8     | yellow |
| DRG2     | yellow |
| DSE      | yellow |
| DTD1     | yellow |
| DTX3     | yellow |
| DTYMK    | yellow |
| DUS1L    | yellow |
| DUS2L    | yellow |
| DUS3L    | yellow |
| DUSP10   | yellow |
| DUSP2    | yellow |
| DUSP23   | yellow |
| DUSP3    | yellow |
| DVL1     | yellow |
| DYM      | yellow |
| DYNC1LI1 | yellow |
| E2F1     | yellow |
| E4F1     | yellow |
| EAF1     | yellow |
| ECI1     | yellow |
| EDF1     | yellow |
| EEF1A2   | yellow |
| EEF1D    | yellow |
| EEF1G    | yellow |
| EHHADH   | yellow |
| EIF1     | yellow |
| EIF2B2   | yellow |
| EIF2B4   | yellow |
| EIF3F    | yellow |
| EIF3G    | yellow |
| EIF3I    | yellow |
| EIF3K    | yellow |
| EIF4G3   | yellow |
| ELF1     | yellow |
| ELK3     | yellow |
| ELMO3    | yellow |
| ELP4     | yellow |
| ENGASE   | yellow |



|         |        |
|---------|--------|
| ENHO    | yellow |
| ENTPD7  | yellow |
| EPC1    | yellow |
| EPG5    | yellow |
| ERCC1   | yellow |
| ERGIC3  | yellow |
| ERI3    | yellow |
| ERLIN2  | yellow |
| ERP29   | yellow |
| ERP44   | yellow |
| ERV3-1  | yellow |
| ESPNL   | yellow |
| ETF1    | yellow |
| ETFB    | yellow |
| ETNK2   | yellow |
| ETV2    | yellow |
| ETV3    | yellow |
| EXD3    | yellow |
| EXOC6B  | yellow |
| EXOSC5  | yellow |
| FADS3   | yellow |
| FAF2    | yellow |
| FAHD2B  | yellow |
| FAM113A | yellow |
| FAM118B | yellow |
| FAM122C | yellow |
| FAM127B | yellow |
| FAM13A  | yellow |
| FAM158A | yellow |
| FAM159A | yellow |
| FAM167B | yellow |
| FAM178B | yellow |
| FAM195A | yellow |
| FAM195B | yellow |
| FAM21B  | yellow |
| FAM3A   | yellow |
| FAM41C  | yellow |
| FAM48A  | yellow |
| FAM53A  | yellow |
| FAM54B  | yellow |
| FAM69B  | yellow |
| FAM73B  | yellow |
| FAM98B  | yellow |
| FANCG   | yellow |
| FASTK   | yellow |
| FBL     | yellow |
| FBLN7   | yellow |
| FBXL15  | yellow |
| FBXL6   | yellow |
| FBXO2   | yellow |
| FBXO24  | yellow |
| FBXO34  | yellow |
| FBXO38  | yellow |
| FBXO44  | yellow |
| FBXW11  | yellow |
| FBXW5   | yellow |
| FBXW9   | yellow |
| FCGR3A  | yellow |
| FCHSD1  | yellow |
| FCHSD2  | yellow |
| FCRLB   | yellow |
| FDX1L   | yellow |
| FDXR    | yellow |
| FEM1B   | yellow |
| FGD6    | yellow |
| FIBP    | yellow |
| FICD    | yellow |
| FIGNL2  | yellow |

|            |        |
|------------|--------|
| FKBP11     | yellow |
| FKBP2      | yellow |
| FLAD1      | yellow |
| FLJ13197   | yellow |
| FLJ45244   | yellow |
| FLJ46906   | yellow |
| FLT3LG     | yellow |
| FLYWCH2    | yellow |
| FNIP2      | yellow |
| FPGS       | yellow |
| FRMD3      | yellow |
| FSD1       | yellow |
| FUK        | yellow |
| FXVD2      | yellow |
| GADD45GIP1 | yellow |
| GAMT       | yellow |
| GAPVD1     | yellow |
| GAS2L3     | yellow |
| GATSL3     | yellow |
| GBAP1      | yellow |
| GCDH       | yellow |
| GCHFR      | yellow |
| GDAP2      | yellow |
| GEMIN7     | yellow |
| GET4       | yellow |
| GFER       | yellow |
| GGA1       | yellow |
| GHDC       | yellow |
| GIMAP5     | yellow |
| GLTSCR2    | yellow |
| GLYCTK     | yellow |
| GNAI3      | yellow |
| GNB1L      | yellow |
| GNB2L1     | yellow |
| GNG8       | yellow |
| GNGT2      | yellow |
| GNPTG      | yellow |
| GOLPH3     | yellow |
| GPBP1L1    | yellow |
| GPR155     | yellow |
| GPR172A    | yellow |
| GPX4       | yellow |
| GRASP      | yellow |
| GRIN3A     | yellow |
| GSTT1      | yellow |
| GTF2A1     | yellow |
| GTF2H2D    | yellow |
| GTF3C5     | yellow |
| GTPBP3     | yellow |
| GTPBP6     | yellow |
| GYG1       | yellow |
| GZMM       | yellow |
| H2AFJ      | yellow |
| H2AFY2     | yellow |
| HAGHL      | yellow |
| HAPLN3     | yellow |
| HAUS8      | yellow |
| HBP1       | yellow |
| HCCS       | yellow |
| HCST       | yellow |
| HDAC10     | yellow |
| HDAC11     | yellow |
| HDHD3      | yellow |
| HELZ       | yellow |
| HERC3      | yellow |
| HERPUD2    | yellow |
| HES6       | yellow |
| HES7       | yellow |

|          |        |
|----------|--------|
| HEXDC    | yellow |
| HIAT1    | yellow |
| HIATL1   | yellow |
| HINFP    | yellow |
| HINT2    | yellow |
| HIP1R    | yellow |
| HIPK1    | yellow |
| HIPK3    | yellow |
| HIVEP2   | yellow |
| HNRNPH3  | yellow |
| HOOK3    | yellow |
| HPS3     | yellow |
| HPX      | yellow |
| HRAS     | yellow |
| HSD11B1L | yellow |
| HSD17B1  | yellow |
| HSD17B12 | yellow |
| HSD17B8  | yellow |
| ID3      | yellow |
| IFFO1    | yellow |
| IFRD2    | yellow |
| IFT27    | yellow |
| IGFBP6   | yellow |
| IGSF8    | yellow |
| IKZF4    | yellow |
| IL17C    | yellow |
| IL17D    | yellow |
| ILVBL    | yellow |
| IMP4     | yellow |
| INO80E   | yellow |
| IPO8     | yellow |
| IQCC     | yellow |
| IQGAP2   | yellow |
| IRAK4    | yellow |
| IRF3     | yellow |
| ISOC1    | yellow |
| ISOC2    | yellow |
| ISYNA1   | yellow |
| ITFG1    | yellow |
| ITGB1BP2 | yellow |
| ITPA     | yellow |
| ITPRIPL2 | yellow |
| ITSN2    | yellow |
| IZUMO4   | yellow |
| JAG2     | yellow |
| JAGN1    | yellow |
| JMJD4    | yellow |
| JMJD7    | yellow |
| JMJD8    | yellow |
| JOSD2    | yellow |
| JSRP1    | yellow |
| KANK3    | yellow |
| KAT2A    | yellow |
| KCNH4    | yellow |
| KCNN4    | yellow |
| KCNQ4    | yellow |
| KCTD17   | yellow |
| KCTD20   | yellow |
| KDM3A    | yellow |
| KDM5A    | yellow |
| KDM6A    | yellow |
| KHK      | yellow |
| KIAA0114 | yellow |
| KIAA0240 | yellow |
| KIAA0415 | yellow |
| KIAA1432 | yellow |
| KIAA1875 | yellow |
| KIAA1984 | yellow |

|              |        |
|--------------|--------|
| KIAA2018     | yellow |
| KIAA2026     | yellow |
| KIDINS220    | yellow |
| KIF15        | yellow |
| KIF20A       | yellow |
| KIF24        | yellow |
| KIF7         | yellow |
| KLF10        | yellow |
| KLHL12       | yellow |
| KLHL17       | yellow |
| KLHL35       | yellow |
| KLHL8        | yellow |
| KLRAQ1       | yellow |
| KREMEN2      | yellow |
| KRT18        | yellow |
| KRTCAP2      | yellow |
| KRTCAP3      | yellow |
| LAGE3        | yellow |
| LAMB1        | yellow |
| LAMTOR2      | yellow |
| LARP4B       | yellow |
| LAT          | yellow |
| LATS1        | yellow |
| LATS2        | yellow |
| LCMT1        | yellow |
| LCNL1        | yellow |
| LEMD2        | yellow |
| LEPRE1       | yellow |
| LEPREL2      | yellow |
| LGALS1       | yellow |
| LGALS4       | yellow |
| LGALS8       | yellow |
| LGALS9B      | yellow |
| LHB          | yellow |
| LIMD2        | yellow |
| LIME1        | yellow |
| LIMS2        | yellow |
| LMBR1L       | yellow |
| LMF1         | yellow |
| LMF2         | yellow |
| LOC100129550 | yellow |
| LOC100130705 | yellow |
| LOC100131320 | yellow |
| LOC100132077 | yellow |
| LOC100134713 | yellow |
| LOC100272216 | yellow |
| LOC100287177 | yellow |
| LOC100287559 | yellow |
| LOC100289341 | yellow |
| LOC100379224 | yellow |
| LOC100499489 | yellow |
| LOC100507062 | yellow |
| LOC100507495 | yellow |
| LOC100630923 | yellow |
| LOC148413    | yellow |
| LOC150776    | yellow |
| LOC155060    | yellow |
| LOC284889    | yellow |
| LOC285819    | yellow |
| LOC286059    | yellow |
| LOC388796    | yellow |
| LOC390595    | yellow |
| LOC401431    | yellow |
| LOC550643    | yellow |
| LOC641518    | yellow |
| LOC643669    | yellow |
| LOC728323    | yellow |
| LOC728431    | yellow |

|            |        |
|------------|--------|
| LOC728743  | yellow |
| LOC729513  | yellow |
| LOC729678  | yellow |
| LONRF3     | yellow |
| LPAR1      | yellow |
| LPP        | yellow |
| LRRC14     | yellow |
| LRRC27     | yellow |
| LRRC29     | yellow |
| LRRC32     | yellow |
| LRRC45     | yellow |
| LRRC56     | yellow |
| LRRC57     | yellow |
| LRRC68     | yellow |
| LSM12      | yellow |
| LSM14A     | yellow |
| LSM2       | yellow |
| LSM4       | yellow |
| LTBP4      | yellow |
| LTK        | yellow |
| LY86       | yellow |
| LYPD2      | yellow |
| LYSMD4     | yellow |
| LYZ        | yellow |
| MACROD1    | yellow |
| MAD1L1     | yellow |
| MAGI3      | yellow |
| MAL        | yellow |
| MAMDC4     | yellow |
| MAML2      | yellow |
| MAN1B1     | yellow |
| MAP3K10    | yellow |
| MAP4K2     | yellow |
| MAPK1      | yellow |
| MAPK11     | yellow |
| MAPK1IP1L  | yellow |
| MATK       | yellow |
| MAZ        | yellow |
| MBD3       | yellow |
| MBD5       | yellow |
| MBLAC1     | yellow |
| MC1R       | yellow |
| MCC        | yellow |
| MCM7       | yellow |
| MCRS1      | yellow |
| MEA1       | yellow |
| MECR       | yellow |
| MED1       | yellow |
| MED13L     | yellow |
| MED18      | yellow |
| MEI1       | yellow |
| MESP1      | yellow |
| METAP1D    | yellow |
| METRNL     | yellow |
| METTL11A   | yellow |
| METTL12    | yellow |
| METTL22    | yellow |
| MFI2       | yellow |
| MFI2-AS1   | yellow |
| MFNG       | yellow |
| MFSD10     | yellow |
| MFSD3      | yellow |
| MFSD9      | yellow |
| MGMT       | yellow |
| MIA3       | yellow |
| MICB       | yellow |
| MIF4GD     | yellow |
| MIRLET7BHG | yellow |

|            |        |
|------------|--------|
| MKI67      | yellow |
| MLL3       | yellow |
| MLL5       | yellow |
| MLST8      | yellow |
| MMAB       | yellow |
| MMP28      | yellow |
| MOB2       | yellow |
| MOGS       | yellow |
| MORC2-AS1  | yellow |
| MPDU1      | yellow |
| MPG        | yellow |
| MPV17L2    | yellow |
| MR1        | yellow |
| MRI1       | yellow |
| MRPL12     | yellow |
| MRPL20     | yellow |
| MRPL23     | yellow |
| MRPL24     | yellow |
| MRPL38     | yellow |
| MRPL52     | yellow |
| MRPL54     | yellow |
| MRPL55     | yellow |
| MRPS11     | yellow |
| MRPS12     | yellow |
| MRPS15     | yellow |
| MRPS18A    | yellow |
| MRPS26     | yellow |
| MRPS34     | yellow |
| MSH3       | yellow |
| MST1       | yellow |
| MST1P2     | yellow |
| MT1F       | yellow |
| MT1X       | yellow |
| MTFP1      | yellow |
| MTG1       | yellow |
| MTM1       | yellow |
| MTMR1      | yellow |
| MTRNR2L8   | yellow |
| MUS81      | yellow |
| MUT        | yellow |
| MUTYH      | yellow |
| MVD        | yellow |
| MVK        | yellow |
| MXD4       | yellow |
| MYH10      | yellow |
| MYLIP      | yellow |
| MYLK3      | yellow |
| MZF1       | yellow |
| MZT2B      | yellow |
| NAA10      | yellow |
| NAALADL1   | yellow |
| NAGLU      | yellow |
| NAGS       | yellow |
| NAPSA      | yellow |
| NAPSB      | yellow |
| NARFL      | yellow |
| NAT14      | yellow |
| NAT6       | yellow |
| NAT9       | yellow |
| NCAPH      | yellow |
| NCAPH2     | yellow |
| NCEH1      | yellow |
| NCOA3      | yellow |
| NCR3       | yellow |
| NCRNA00087 | yellow |
| NCRNA00263 | yellow |
| NCRNA00338 | yellow |
| NDOR1      | yellow |

|          |        |
|----------|--------|
| NDUFA11  | yellow |
| NDUFA13  | yellow |
| NDUFA3   | yellow |
| NDUFA8   | yellow |
| NDUFB10  | yellow |
| NDUFB11  | yellow |
| NDUFB7   | yellow |
| NDUFB8   | yellow |
| NDUFB9   | yellow |
| NDUFS6   | yellow |
| NDUFS7   | yellow |
| NDUFS8   | yellow |
| NDUFV1   | yellow |
| NECAB3   | yellow |
| NEIL1    | yellow |
| NELF     | yellow |
| NENF     | yellow |
| NEURL2   | yellow |
| NF1      | yellow |
| NFAT5    | yellow |
| NFE2L3   | yellow |
| NFKBIL1  | yellow |
| NGFRAP1  | yellow |
| NHLRC4   | yellow |
| NHP2     | yellow |
| NIPA2    | yellow |
| NIPBL    | yellow |
| NKPD1    | yellow |
| NLE1     | yellow |
| NME3     | yellow |
| NME4     | yellow |
| NMRAL1   | yellow |
| NOB1     | yellow |
| NOG      | yellow |
| NOL12    | yellow |
| NOSIP    | yellow |
| NOXA1    | yellow |
| NOXO1    | yellow |
| NPDC1    | yellow |
| NPRL2    | yellow |
| NR2C2AP  | yellow |
| NRL      | yellow |
| NRP1     | yellow |
| NSF      | yellow |
| NSMCE1   | yellow |
| NSRP1    | yellow |
| NSUN5    | yellow |
| NSUN5P1  | yellow |
| NSUN5P2  | yellow |
| NT5C     | yellow |
| NTHL1    | yellow |
| NUBP2    | yellow |
| NUDT1    | yellow |
| NUDT14   | yellow |
| NUDT16L1 | yellow |
| NUDT17   | yellow |
| NUDT18   | yellow |
| NUDT22   | yellow |
| NUDT8    | yellow |
| NUP153   | yellow |
| NUSAP1   | yellow |
| OBFC1    | yellow |
| OBFC2B   | yellow |
| OGFOD2   | yellow |
| OGG1     | yellow |
| OSBPL9   | yellow |
| OXS1     | yellow |
| P2RX6    | yellow |

|          |        |
|----------|--------|
| P2RX7    | yellow |
| P4HTM    | yellow |
| PAFAH1B2 | yellow |
| PAFAH1B3 | yellow |
| PANK4    | yellow |
| PANX1    | yellow |
| PAOX     | yellow |
| PAPSS1   | yellow |
| PARD6G   | yellow |
| PARK7    | yellow |
| PARP10   | yellow |
| PARP3    | yellow |
| PARS2    | yellow |
| PATL1    | yellow |
| PBLD     | yellow |
| PBX4     | yellow |
| PCOLCE   | yellow |
| PCP2     | yellow |
| PCSK4    | yellow |
| PCYT2    | yellow |
| PDCD1    | yellow |
| PDE6G    | yellow |
| PDK4     | yellow |
| PEMT     | yellow |
| PEX16    | yellow |
| PEX6     | yellow |
| PFKFB2   | yellow |
| PGM2     | yellow |
| PGP      | yellow |
| PHEX     | yellow |
| PHF1     | yellow |
| PHF16    | yellow |
| PHF20    | yellow |
| PHF3     | yellow |
| PHKB     | yellow |
| PHKG1    | yellow |
| PHLDA3   | yellow |
| PHPT1    | yellow |
| PI16     | yellow |
| PICK1    | yellow |
| PIDD     | yellow |
| PIGQ     | yellow |
| PIH1D1   | yellow |
| PIK3C3   | yellow |
| PIK3CB   | yellow |
| PIK3CG   | yellow |
| PIN1     | yellow |
| PIP5K1A  | yellow |
| PIP5K1B  | yellow |
| PIP5K1L1 | yellow |
| PLA2G6   | yellow |
| PLCD1    | yellow |
| PLEKHA4  | yellow |
| PLEKHF1  | yellow |
| PLEKHG4  | yellow |
| PLEKHG5  | yellow |
| PLEKHJ1  | yellow |
| PLEKHM3  | yellow |
| PMM1     | yellow |
| PMVK     | yellow |
| PNKP     | yellow |
| PNMT     | yellow |
| POLD1    | yellow |
| POLD4    | yellow |
| POLM     | yellow |
| POLR2F   | yellow |
| POLR2G   | yellow |
| POLR2I   | yellow |



|          |        |
|----------|--------|
| POLR2J4  | yellow |
| POLR2L   | yellow |
| POLR3K   | yellow |
| POLRMT   | yellow |
| POMT1    | yellow |
| POMZP3   | yellow |
| POP7     | yellow |
| POU2F1   | yellow |
| PPAN     | yellow |
| PPAP2C   | yellow |
| PPM1D    | yellow |
| PPM1J    | yellow |
| PPM1L    | yellow |
| PPM1N    | yellow |
| PPOX     | yellow |
| PPP1R12C | yellow |
| PPP1R14A | yellow |
| PPP1R14B | yellow |
| PPP1R16A | yellow |
| PPP1R3F  | yellow |
| PPP2R3B  | yellow |
| PPTC7    | yellow |
| PRADC1   | yellow |
| PRDM1    | yellow |
| PREB     | yellow |
| PRKAR2A  | yellow |
| PRMT7    | yellow |
| PROCR    | yellow |
| PRR22    | yellow |
| PRR5     | yellow |
| PRRC2C   | yellow |
| PRSS22   | yellow |
| PRSS30P  | yellow |
| PRSS53   | yellow |
| PSD      | yellow |
| PSMA7    | yellow |
| PSMB4    | yellow |
| PSMB5    | yellow |
| PSMB7    | yellow |
| PSMD9    | yellow |
| PSMG3    | yellow |
| PTDSS2   | yellow |
| PTGES2   | yellow |
| PTPLB    | yellow |
| PTPRC    | yellow |
| PTPRCAP  | yellow |
| PTRH1    | yellow |
| PUS1     | yellow |
| PUSL1    | yellow |
| PVRIG    | yellow |
| PXK      | yellow |
| PYCRL    | yellow |
| PYROXD2  | yellow |
| QARS     | yellow |
| QPCTL    | yellow |
| QTRT1    | yellow |
| R3HCC1   | yellow |
| RAB21    | yellow |
| RAB25    | yellow |
| RAB33A   | yellow |
| RAB39    | yellow |
| RABEP2   | yellow |
| RABEPK   | yellow |
| RABGEF1  | yellow |
| RABGGTA  | yellow |
| RAC3     | yellow |
| RAD21    | yellow |
| RAD9A    | yellow |

|                |        |
|----------------|--------|
| RALGAPB        | yellow |
| RANBP9         | yellow |
| RASA2          | yellow |
| RASA4P         | yellow |
| RASSF7         | yellow |
| RBBP5          | yellow |
| RBMXL1         | yellow |
| RBPMS          | yellow |
| RC3H1          | yellow |
| REC8           | yellow |
| RECQL4         | yellow |
| REEP6          | yellow |
| RELL2          | yellow |
| REXO1L1        | yellow |
| RFTN2          | yellow |
| RFX3           | yellow |
| RGL1           | yellow |
| RHBDD3         | yellow |
| RHOC           | yellow |
| RHOT2          | yellow |
| RHPN1          | yellow |
| RINL           | yellow |
| RLIM           | yellow |
| RNASEH2C       | yellow |
| RNF113A        | yellow |
| RNF115         | yellow |
| RNF166         | yellow |
| RNF169         | yellow |
| RNF181         | yellow |
| RNF215         | yellow |
| RNF25          | yellow |
| RNMTL1         | yellow |
| ROBO3          | yellow |
| ROCK2          | yellow |
| RPL13          | yellow |
| RPL18          | yellow |
| RPL18A         | yellow |
| RPL28          | yellow |
| RPL29          | yellow |
| RPL38          | yellow |
| RPL8           | yellow |
| RPLP1          | yellow |
| RPLP2          | yellow |
| RPS15          | yellow |
| RPS19BP1       | yellow |
| RPS2           | yellow |
| RPS28          | yellow |
| RPS6KB2        | yellow |
| RPS6KC1        | yellow |
| RPS6KL1        | yellow |
| RPUSD1         | yellow |
| RPUSD3         | yellow |
| RQCD1          | yellow |
| RRP7B          | yellow |
| RRP9           | yellow |
| RSC1A1         | yellow |
| RSF1           | yellow |
| RSRC1          | yellow |
| RTEL1          | yellow |
| RTEL1-TNFRSF6B | yellow |
| RTN4R          | yellow |
| RUSC1          | yellow |
| S100A13        | yellow |
| S1PR3          | yellow |
| SAC3D1         | yellow |
| SAP30L         | yellow |
| SARDH          | yellow |
| SARS2          | yellow |

|          |        |
|----------|--------|
| SAT2     | yellow |
| SCARB2   | yellow |
| SCARNA12 | yellow |
| SCARNA9  | yellow |
| SCNN1D   | yellow |
| SCRN2    | yellow |
| SDHAF1   | yellow |
| SDHAF2   | yellow |
| SDR39U1  | yellow |
| SEC22B   | yellow |
| SEC24B   | yellow |
| SELM     | yellow |
| SELO     | yellow |
| SEMA6A   | yellow |
| SENP2    | yellow |
| SEPW1    | yellow |
| SERGEF   | yellow |
| SERINC3  | yellow |
| SERPINB9 | yellow |
| SERPINF1 | yellow |
| SERPINF2 | yellow |
| SERTAD2  | yellow |
| SETD2    | yellow |
| SETD7    | yellow |
| SETX     | yellow |
| SF3B5    | yellow |
| SGCA     | yellow |
| SGK3     | yellow |
| SGSM3    | yellow |
| SH2D3A   | yellow |
| SH3GLB2  | yellow |
| SH3RF1   | yellow |
| SHCBP1   | yellow |
| SHE      | yellow |
| SHF      | yellow |
| SIGIRR   | yellow |
| SIGLEC14 | yellow |
| SIRT3    | yellow |
| SIVA1    | yellow |
| SIX5     | yellow |
| SLC16A11 | yellow |
| SLC16A4  | yellow |
| SLC17A9  | yellow |
| SLC1A3   | yellow |
| SLC22A17 | yellow |
| SLC25A19 | yellow |
| SLC25A25 | yellow |
| SLC25A29 | yellow |
| SLC25A35 | yellow |
| SLC25A5  | yellow |
| SLC25A6  | yellow |
| SLC26A11 | yellow |
| SLC29A2  | yellow |
| SLC2A4RG | yellow |
| SLC2A8   | yellow |
| SLC35B2  | yellow |
| SLC35D2  | yellow |
| SLC37A4  | yellow |
| SLC39A13 | yellow |
| SLC39A9  | yellow |
| SLC41A3  | yellow |
| SLC44A1  | yellow |
| SLC50A1  | yellow |
| SLC5A5   | yellow |
| SLC7A4   | yellow |
| SLMO1    | yellow |
| SMAP1    | yellow |
| SMCR7    | yellow |

|            |        |
|------------|--------|
| SMPD2      | yellow |
| SNF8       | yellow |
| SNHG11     | yellow |
| SNRNP25    | yellow |
| SNRPC      | yellow |
| SNTB2      | yellow |
| SNX20      | yellow |
| SOAT1      | yellow |
| SOAT2      | yellow |
| SOS1       | yellow |
| SOX12      | yellow |
| SOX8       | yellow |
| SP1        | yellow |
| SPAG4      | yellow |
| SPAG8      | yellow |
| SPATA13    | yellow |
| SPATA20    | yellow |
| SPEG       | yellow |
| SPG20      | yellow |
| SPHK2      | yellow |
| SPPL2A     | yellow |
| SPPL2B     | yellow |
| SPRED2     | yellow |
| SPRN       | yellow |
| SPRY3      | yellow |
| SPSB2      | yellow |
| SPSB3      | yellow |
| SPTBN4     | yellow |
| SRGAP2P2   | yellow |
| SSNA1      | yellow |
| SSR1       | yellow |
| SSR4       | yellow |
| ST3GAL3    | yellow |
| ST6GALNAC6 | yellow |
| STAM       | yellow |
| STAMBP     | yellow |
| STAP2      | yellow |
| STK25      | yellow |
| STMN3      | yellow |
| STOML1     | yellow |
| STOML2     | yellow |
| STRA13     | yellow |
| STRC       | yellow |
| STRN       | yellow |
| STS        | yellow |
| STUB1      | yellow |
| STX1A      | yellow |
| SUDS3      | yellow |
| SURF1      | yellow |
| SUSD2      | yellow |
| SUV420H1   | yellow |
| SWI5       | yellow |
| SYCE1L     | yellow |
| SYNGR1     | yellow |
| SYT17      | yellow |
| SYTL1      | yellow |
| TACC1      | yellow |
| TADA3      | yellow |
| TAGAP      | yellow |
| TAOK3      | yellow |
| TAZ        | yellow |
| TBC1D10A   | yellow |
| TBC1D10C   | yellow |
| TBC1D17    | yellow |
| TBL2       | yellow |
| TBL3       | yellow |
| TBRG4      | yellow |
| TCEA2      | yellow |

|          |        |
|----------|--------|
| TCEB2    | yellow |
| TCTA     | yellow |
| TEDDM1   | yellow |
| TELO2    | yellow |
| TEX22    | yellow |
| TGM1     | yellow |
| THAP11   | yellow |
| THAP3    | yellow |
| THAP7    | yellow |
| THOC6    | yellow |
| THOP1    | yellow |
| TIMM10   | yellow |
| TIMM13   | yellow |
| TIMM50   | yellow |
| TIPARP   | yellow |
| TLE2     | yellow |
| TLK2     | yellow |
| TLR7     | yellow |
| TM7SF2   | yellow |
| TMED1    | yellow |
| TMED3    | yellow |
| TMED8    | yellow |
| TMED9    | yellow |
| TMEM101  | yellow |
| TMEM129  | yellow |
| TMEM134  | yellow |
| TMEM138  | yellow |
| TMEM141  | yellow |
| TMEM143  | yellow |
| TMEM147  | yellow |
| TMEM150A | yellow |
| TMEM161A | yellow |
| TMEM179B | yellow |
| TMEM184C | yellow |
| TMEM186  | yellow |
| TMEM187  | yellow |
| TMEM189  | yellow |
| TMEM2    | yellow |
| TMEM203  | yellow |
| TMEM219  | yellow |
| TMEM222  | yellow |
| TMEM53   | yellow |
| TMEM79   | yellow |
| TMEM80   | yellow |
| TMEM85   | yellow |
| TMEM9    | yellow |
| TMEM99   | yellow |
| TMIE     | yellow |
| TMIGD2   | yellow |
| TMOD3    | yellow |
| TMPRSS5  | yellow |
| TMSB4X   | yellow |
| TMTC2    | yellow |
| TNFAIP3  | yellow |
| TNFRSF18 | yellow |
| TNFRSF25 | yellow |
| TNFRSF4  | yellow |
| TNFRSF6B | yellow |
| TNFSF12  | yellow |
| TNFSF15  | yellow |
| TNIP2    | yellow |
| TNK1     | yellow |
| TNNT3    | yellow |
| TOMM40L  | yellow |
| TOP1     | yellow |
| TOP2A    | yellow |
| TOP3B    | yellow |
| TOPBP1   | yellow |

|          |        |
|----------|--------|
| TOR1AIP1 | yellow |
| TP53I13  | yellow |
| TP73     | yellow |
| TPM2     | yellow |
| TPR      | yellow |
| TRABD    | yellow |
| TRAF2    | yellow |
| TRAF4    | yellow |
| TRAF6    | yellow |
| TRAPPC2L | yellow |
| TRAPPC4  | yellow |
| TRAPPC6A | yellow |
| TREX2    | yellow |
| TRIB3    | yellow |
| TRIM24   | yellow |
| TRIM34   | yellow |
| TRIM46   | yellow |
| TRIM78P  | yellow |
| TRIP12   | yellow |
| TRMT1    | yellow |
| TRMT112  | yellow |
| TRMT2A   | yellow |
| TRMT61A  | yellow |
| TRMU     | yellow |
| TRPS1    | yellow |
| TRPT1    | yellow |
| TRUB2    | yellow |
| TSPAN17  | yellow |
| TSPAN32  | yellow |
| TSSC1    | yellow |
| TSSC4    | yellow |
| TSSK6    | yellow |
| TSTD1    | yellow |
| TTC34    | yellow |
| TTC4     | yellow |
| TTC9C    | yellow |
| TTN      | yellow |
| TUBB6    | yellow |
| TUBGCP3  | yellow |
| TUFM     | yellow |
| TUT1     | yellow |
| TXN2     | yellow |
| TXNL4A   | yellow |
| TXNRD1   | yellow |
| TYSND1   | yellow |
| UBA7     | yellow |
| UBASH3B  | yellow |
| UBL4A    | yellow |
| UBQLN1   | yellow |
| UBQLN2   | yellow |
| UBXN1    | yellow |
| UBXN11   | yellow |
| UCK1     | yellow |
| UCKL1    | yellow |
| UEVLD    | yellow |
| ULK3     | yellow |
| UPF2     | yellow |
| UROD     | yellow |
| UROS     | yellow |
| USE1     | yellow |
| USP30    | yellow |
| USP34    | yellow |
| USP6NL   | yellow |
| USP8     | yellow |
| USP9X    | yellow |
| VARS2    | yellow |
| VAV3     | yellow |
| VILL     | yellow |

|          |        |
|----------|--------|
| VKORC1   | yellow |
| VKORC1L1 | yellow |
| VMO1     | yellow |
| VPS13B   | yellow |
| VPS16    | yellow |
| VPS41    | yellow |
| VTI1A    | yellow |
| WASH2P   | yellow |
| WASH3P   | yellow |
| WASH7P   | yellow |
| WBSCR27  | yellow |
| WDR18    | yellow |
| WDR20    | yellow |
| WDR24    | yellow |
| WDR34    | yellow |
| WDR54    | yellow |
| WDR73    | yellow |
| WDR74    | yellow |
| WDR83    | yellow |
| WDR85    | yellow |
| WDR90    | yellow |
| WHSC1L1  | yellow |
| WIBG     | yellow |
| WNT7A    | yellow |
| WRAP53   | yellow |
| XPR1     | yellow |
| YDJC     | yellow |
| YIPF5    | yellow |
| YME1L1   | yellow |
| YTHDC1   | yellow |
| YWHAZ    | yellow |
| ZAP70    | yellow |
| ZBTB17   | yellow |
| ZBTB20   | yellow |
| ZC3HAV1  | yellow |
| ZDHH4    | yellow |
| ZEB2     | yellow |
| ZFAND2B  | yellow |
| ZFP91    | yellow |
| ZFR2     | yellow |
| ZFYVE19  | yellow |
| ZFYVE27  | yellow |
| ZG16B    | yellow |
| ZMYND10  | yellow |
| ZMYND19  | yellow |
| ZNF274   | yellow |
| ZNF333   | yellow |
| ZNF366   | yellow |
| ZNF394   | yellow |
| ZNF446   | yellow |
| ZNF48    | yellow |
| ZNF486   | yellow |
| ZNF500   | yellow |
| ZNF511   | yellow |
| ZNF517   | yellow |
| ZNF524   | yellow |
| ZNF581   | yellow |
| ZNF593   | yellow |
| ZNF641   | yellow |
| ZNF653   | yellow |
| ZNF688   | yellow |
| ZNF691   | yellow |
| ZNF692   | yellow |
| ZNF707   | yellow |
| ZNF71    | yellow |
| ZNF821   | yellow |
| ZNF890P  | yellow |
| ZNHIT1   | yellow |

ZNHIT2  
ZP3  
ZSCAN18  
ZYG11B

yellow  
yellow  
yellow  
yellow
