# Supplementary material for: Meditation and vacation effects have an impact on disease-associated molecular phenotypes
Source: PubMed Central journal article supplement (PMC5022094; doi:10.1038/tp.2016.164), 2016-08-30
Supplement: tp2016164x4.pdf [file tp2016164x4.pdf]

**Supplementary Table 5. Pathway enrichments for the coexpression network modules identified in Supplementary Table 4**

| module | GO Type | GO.ID      | Term                                         | Total Genes | Annotated Genes | In Sig | Significant | Expected | classic  | fold_enric | gene_list                                                                                                                                                                                                                                                                                                                                                                                                                                                                                                                                                                                                                                                                                                                                                                                                                                                                                                                                                                                                                                                                                                                                                                                                                                                                                                                                                                                                                                                                                                                                                                                                                                                                                                                                                                                                                                                                                                                                                                                                                                                                                                                                                                                                                                                                                                                                                                                                                                                                                                                                                                                                                                                                                                                                                                                                                                                                                                                                                                                                                                                                                                                                                                                                                                                                                                                                                                                                                                                                                                                                                                                               |
|--------|---------|------------|----------------------------------------------|-------------|-----------------|--------|-------------|----------|----------|------------|---------------------------------------------------------------------------------------------------------------------------------------------------------------------------------------------------------------------------------------------------------------------------------------------------------------------------------------------------------------------------------------------------------------------------------------------------------------------------------------------------------------------------------------------------------------------------------------------------------------------------------------------------------------------------------------------------------------------------------------------------------------------------------------------------------------------------------------------------------------------------------------------------------------------------------------------------------------------------------------------------------------------------------------------------------------------------------------------------------------------------------------------------------------------------------------------------------------------------------------------------------------------------------------------------------------------------------------------------------------------------------------------------------------------------------------------------------------------------------------------------------------------------------------------------------------------------------------------------------------------------------------------------------------------------------------------------------------------------------------------------------------------------------------------------------------------------------------------------------------------------------------------------------------------------------------------------------------------------------------------------------------------------------------------------------------------------------------------------------------------------------------------------------------------------------------------------------------------------------------------------------------------------------------------------------------------------------------------------------------------------------------------------------------------------------------------------------------------------------------------------------------------------------------------------------------------------------------------------------------------------------------------------------------------------------------------------------------------------------------------------------------------------------------------------------------------------------------------------------------------------------------------------------------------------------------------------------------------------------------------------------------------------------------------------------------------------------------------------------------------------------------------------------------------------------------------------------------------------------------------------------------------------------------------------------------------------------------------------------------------------------------------------------------------------------------------------------------------------------------------------------------------------------------------------------------------------------------------------------|
| yellow | CC      | GO:0005622 | intracellular                                | 17735       | 12344           | 1225   | 958         | 837.77   | 8.70E-19 | 1.143512   | ABCB8;ABCB9;ABHD14A;ABT1;ACADS;ACER3;ACOT8;ACPS;ACSL3;ACTR1B;ACTR3;ADAM12;ADAM9;ADCK5;A                                                                                                                                                                                                                                                                                                                                                                                                                                                                                                                                                                                                                                                                                                                                                                                                                                                                                                                                                                                                                                                                                                                                                                                                                                                                                                                                                                                                                                                                                                                                                                                                                                                                                                                                                                                                                                                                                                                                                                                                                                                                                                                                                                                                                                                                                                                                                                                                                                                                                                                                                                                                                                                                                                                                                                                                                                                                                                                                                                                                                                                                                                                                                                                                                                                                                                                                                                                                                                                                                                                 |
| yellow | CC      | GO:0044444 | cytoplasmic part                             | 17735       | 6562            | 1225   | 581         | 445.35   | 2.10E-17 | 1.304592   | ABCB8;ABCB9;ACADS;ACER3;ACOT8;ACPS;ACSL3;ACTR1B;ACTR3;ADAM12;ADCK5;ADHFE1;ADPRHL2;AFMIC                                                                                                                                                                                                                                                                                                                                                                                                                                                                                                                                                                                                                                                                                                                                                                                                                                                                                                                                                                                                                                                                                                                                                                                                                                                                                                                                                                                                                                                                                                                                                                                                                                                                                                                                                                                                                                                                                                                                                                                                                                                                                                                                                                                                                                                                                                                                                                                                                                                                                                                                                                                                                                                                                                                                                                                                                                                                                                                                                                                                                                                                                                                                                                                                                                                                                                                                                                                                                                                                                                                 |
| yellow | CC      | GO:0044424 | intracellular part                           | 17735       | 12103           | 1225   | 937         | 821.41   | 9.00E-17 | 1.140721   | ABCB8;ABCB9;ABHD14A;ABT1;ACADS;ACER3;ACOT8;ACPS;ACSL3;ACTR1B;ACTR3;ADAM12;ADAM9;ADCK5;A                                                                                                                                                                                                                                                                                                                                                                                                                                                                                                                                                                                                                                                                                                                                                                                                                                                                                                                                                                                                                                                                                                                                                                                                                                                                                                                                                                                                                                                                                                                                                                                                                                                                                                                                                                                                                                                                                                                                                                                                                                                                                                                                                                                                                                                                                                                                                                                                                                                                                                                                                                                                                                                                                                                                                                                                                                                                                                                                                                                                                                                                                                                                                                                                                                                                                                                                                                                                                                                                                                                 |
| yellow | CC      | GO:0005737 | cytoplasm                                    | 17735       | 9016            | 1225   | 744         | 611.9    | 1.30E-16 | 1.215885   | ABCB8;ABCB9;ABHD14A;ACADS;ACER3;ACOT8;ACPS;ACSL3;ACTR1B;ACTR3;ADAM12;ADAM9;ADCK5;ADHFE                                                                                                                                                                                                                                                                                                                                                                                                                                                                                                                                                                                                                                                                                                                                                                                                                                                                                                                                                                                                                                                                                                                                                                                                                                                                                                                                                                                                                                                                                                                                                                                                                                                                                                                                                                                                                                                                                                                                                                                                                                                                                                                                                                                                                                                                                                                                                                                                                                                                                                                                                                                                                                                                                                                                                                                                                                                                                                                                                                                                                                                                                                                                                                                                                                                                                                                                                                                                                                                                                                                  |
| yellow | MF      | GO:0003824 | catalytic activity                           | 17735       | 5264            | 1225   | 480         | 368.81   | 1.70E-13 | 1.301483   | ABCB8;ABCB9;ABHD1;ABHD14A;ACADS;ACER3;ACOT8;ACPS;ACSL3;ADAM12;ADAM9;ADAMDEC1;ADAMTS13                                                                                                                                                                                                                                                                                                                                                                                                                                                                                                                                                                                                                                                                                                                                                                                                                                                                                                                                                                                                                                                                                                                                                                                                                                                                                                                                                                                                                                                                                                                                                                                                                                                                                                                                                                                                                                                                                                                                                                                                                                                                                                                                                                                                                                                                                                                                                                                                                                                                                                                                                                                                                                                                                                                                                                                                                                                                                                                                                                                                                                                                                                                                                                                                                                                                                                                                                                                                                                                                                                                   |
| yellow | CC      | GO:0005739 | mitochondrion                                | 17735       | 1488            | 1225   | 174         | 100.99   | 2.30E-13 | 1.722943   | ABCB8;ACADS;ACER3;ACSL3;ADAM12;ADCK5;ADHFE1;ADPRHL2;AK4;AKAP10;ALKH17;AMT;ATAD3B;ATP5D                                                                                                                                                                                                                                                                                                                                                                                                                                                                                                                                                                                                                                                                                                                                                                                                                                                                                                                                                                                                                                                                                                                                                                                                                                                                                                                                                                                                                                                                                                                                                                                                                                                                                                                                                                                                                                                                                                                                                                                                                                                                                                                                                                                                                                                                                                                                                                                                                                                                                                                                                                                                                                                                                                                                                                                                                                                                                                                                                                                                                                                                                                                                                                                                                                                                                                                                                                                                                                                                                                                  |
| yellow | CC      | GO:0043227 | membrane-bounded organelle                   | 17735       | 9590            | 1225   | 749         | 650.86   | 4.50E-10 | 1.150785   | ABCB8;ABCB9;ABT1;ACADS;ACER3;ACOT8;ACPS;ACSL3;ACTR3;ADAM12;ADCK5;ADHFE1;ADNP;ADPRHL2;AE                                                                                                                                                                                                                                                                                                                                                                                                                                                                                                                                                                                                                                                                                                                                                                                                                                                                                                                                                                                                                                                                                                                                                                                                                                                                                                                                                                                                                                                                                                                                                                                                                                                                                                                                                                                                                                                                                                                                                                                                                                                                                                                                                                                                                                                                                                                                                                                                                                                                                                                                                                                                                                                                                                                                                                                                                                                                                                                                                                                                                                                                                                                                                                                                                                                                                                                                                                                                                                                                                                                 |
| yellow | CC      | GO:0043226 | organelle                                    | 17735       | 10552           | 1225   | 811         | 716.15   | 5.20E-10 | 1.132444   | ABCB8;ABCB9;ABT1;ACADS;ACER3;ACOT8;ACPS;ACSL3;ACTR1B;ACTR3;ADAM12;ADCK5;ADHFE1;ADNP;ADC                                                                                                                                                                                                                                                                                                                                                                                                                                                                                                                                                                                                                                                                                                                                                                                                                                                                                                                                                                                                                                                                                                                                                                                                                                                                                                                                                                                                                                                                                                                                                                                                                                                                                                                                                                                                                                                                                                                                                                                                                                                                                                                                                                                                                                                                                                                                                                                                                                                                                                                                                                                                                                                                                                                                                                                                                                                                                                                                                                                                                                                                                                                                                                                                                                                                                                                                                                                                                                                                                                                 |
| yellow | CC      | GO:0043231 | intracellular membrane-bounded organelle     | 17735       | 9560            | 1225   | 746         | 648.82   | 6.90E-10 | 1.149978   | ABCB8;ABCB9;ABT1;ACADS;ACER3;ACOT8;ACPS;ACSL3;ACTR3;ADAM12;ADCK5;ADHFE1;ADNP;ADPRHL2;AE                                                                                                                                                                                                                                                                                                                                                                                                                                                                                                                                                                                                                                                                                                                                                                                                                                                                                                                                                                                                                                                                                                                                                                                                                                                                                                                                                                                                                                                                                                                                                                                                                                                                                                                                                                                                                                                                                                                                                                                                                                                                                                                                                                                                                                                                                                                                                                                                                                                                                                                                                                                                                                                                                                                                                                                                                                                                                                                                                                                                                                                                                                                                                                                                                                                                                                                                                                                                                                                                                                                 |
| yellow | CC      | GO:0043229 | intracellular organelle                      | 17735       | 10522           | 1225   | 808         | 714.11   | 8.00E-10 | 1.131478   | ABCB8;ABCB9;ABT1;ACADS;ACER3;ACOT8;ACPS;ACSL3;ACTR1B;ACTR3;ADAM12;ADCK5;ADHFE1;ADNP;ADC                                                                                                                                                                                                                                                                                                                                                                                                                                                                                                                                                                                                                                                                                                                                                                                                                                                                                                                                                                                                                                                                                                                                                                                                                                                                                                                                                                                                                                                                                                                                                                                                                                                                                                                                                                                                                                                                                                                                                                                                                                                                                                                                                                                                                                                                                                                                                                                                                                                                                                                                                                                                                                                                                                                                                                                                                                                                                                                                                                                                                                                                                                                                                                                                                                                                                                                                                                                                                                                                                                                 |
| yellow | CC      | GO:0044429 | mitochondrial part                           | 17735       | 740             | 1225   | 94          | 50.22    | 2.10E-09 | 1.871764   | ABCB8;ACADS;ACSL3;ADHFE1;ADPRHL2;AK4;ATAD3B;ATP5D;ATP5G2;ATP5G3;ATP5H;BCS1L;CCS;CDS2;COQ7;COX4I1;CYC1;ECI1;FDXR;FPGS;GCD                                                                                                                                                                                                                                                                                                                                                                                                                                                                                                                                                                                                                                                                                                                                                                                                                                                                                                                                                                                                                                                                                                                                                                                                                                                                                                                                                                                                                                                                                                                                                                                                                                                                                                                                                                                                                                                                                                                                                                                                                                                                                                                                                                                                                                                                                                                                                                                                                                                                                                                                                                                                                                                                                                                                                                                                                                                                                                                                                                                                                                                                                                                                                                                                                                                                                                                                                                                                                                                                                |
| yellow | CC      | GO:0044422 | organelle part                               | 17735       | 6321            | 1225   | 516         | 429      | 2.80E-08 | 1.202797   | ABCB8;ABCB9;ABT1;ACADS;ACER3;ACOT8;ACSL3;ACTR1B;ACTR3;ADHFE1;ADORA2A;ADPRHL2;AFTPH;AK1;A                                                                                                                                                                                                                                                                                                                                                                                                                                                                                                                                                                                                                                                                                                                                                                                                                                                                                                                                                                                                                                                                                                                                                                                                                                                                                                                                                                                                                                                                                                                                                                                                                                                                                                                                                                                                                                                                                                                                                                                                                                                                                                                                                                                                                                                                                                                                                                                                                                                                                                                                                                                                                                                                                                                                                                                                                                                                                                                                                                                                                                                                                                                                                                                                                                                                                                                                                                                                                                                                                                                |
| yellow | CC      | GO:0044446 | intracellular organelle part                 | 17735       | 6219            | 1225   | 508         | 422.07   | 3.80E-08 | 1.203592   | ABCB8;ABCB9;ABT1;ACADS;ACER3;ACOT8;ACSL3;ACTR1B;ACTR3;ADHFE1;ADORA2A;ADPRHL2;AFTPH;AK4;A                                                                                                                                                                                                                                                                                                                                                                                                                                                                                                                                                                                                                                                                                                                                                                                                                                                                                                                                                                                                                                                                                                                                                                                                                                                                                                                                                                                                                                                                                                                                                                                                                                                                                                                                                                                                                                                                                                                                                                                                                                                                                                                                                                                                                                                                                                                                                                                                                                                                                                                                                                                                                                                                                                                                                                                                                                                                                                                                                                                                                                                                                                                                                                                                                                                                                                                                                                                                                                                                                                                |
| yellow | CC      | GO:0031974 | membrane-enclosed lumen                      | 17735       | 2770            | 1225   | 248         | 188      | 9.70E-07 | 1.319149   | ABCB8;ABT1;ACADS;ACOT8;ADHFE1;ADPRHL2;AK4;ANAPC11;ANAPC2;APL2;ARFGEF1;ARNTL;ATF4;ATF7IP;                                                                                                                                                                                                                                                                                                                                                                                                                                                                                                                                                                                                                                                                                                                                                                                                                                                                                                                                                                                                                                                                                                                                                                                                                                                                                                                                                                                                                                                                                                                                                                                                                                                                                                                                                                                                                                                                                                                                                                                                                                                                                                                                                                                                                                                                                                                                                                                                                                                                                                                                                                                                                                                                                                                                                                                                                                                                                                                                                                                                                                                                                                                                                                                                                                                                                                                                                                                                                                                                                                                |
| yellow | CC      | GO:0005740 | mitochondrial envelope                       | 17735       | 520             | 1225   | 64          | 35.29    | 2.50E-06 | 1.813545   | ABCB8;ACADS;ACSL3;ATAD3B;ATP5D;ATP5G2;ATP5G3;ATP5H;BCS1L;BOK;CCS;CDS2;CHCHD5;COQ7;COX4I1;                                                                                                                                                                                                                                                                                                                                                                                                                                                                                                                                                                                                                                                                                                                                                                                                                                                                                                                                                                                                                                                                                                                                                                                                                                                                                                                                                                                                                                                                                                                                                                                                                                                                                                                                                                                                                                                                                                                                                                                                                                                                                                                                                                                                                                                                                                                                                                                                                                                                                                                                                                                                                                                                                                                                                                                                                                                                                                                                                                                                                                                                                                                                                                                                                                                                                                                                                                                                                                                                                                               |
| yellow | CC      | GO:0019866 | organelle inner membrane                     | 17735       | 377             | 1225   | 50          | 25.59    | 4.00E-06 | 1.953888   | ABCB8;ATAD3B;ATP5D;ATP5G2;ATP5G3;ATP5H;BCS1L;CCS;CDS2;COQ7;COX4I1;CYC1;ECI1;FDXR;FPGS;GCD                                                                                                                                                                                                                                                                                                                                                                                                                                                                                                                                                                                                                                                                                                                                                                                                                                                                                                                                                                                                                                                                                                                                                                                                                                                                                                                                                                                                                                                                                                                                                                                                                                                                                                                                                                                                                                                                                                                                                                                                                                                                                                                                                                                                                                                                                                                                                                                                                                                                                                                                                                                                                                                                                                                                                                                                                                                                                                                                                                                                                                                                                                                                                                                                                                                                                                                                                                                                                                                                                                               |
| yellow | CC      | GO:0005743 | mitochondrial inner membrane                 | 17735       | 347             | 1225   | 47          | 23.55    | 4.40E-06 | 1.995754   | ABCB8;ATAD3B;ATP5D;ATP5G2;ATP5G3;ATP5H;BCS1L;CCS;CDS2;COQ7;COX4I1;CYC1;ECI1;FDXR;FPGS;GCD                                                                                                                                                                                                                                                                                                                                                                                                                                                                                                                                                                                                                                                                                                                                                                                                                                                                                                                                                                                                                                                                                                                                                                                                                                                                                                                                                                                                                                                                                                                                                                                                                                                                                                                                                                                                                                                                                                                                                                                                                                                                                                                                                                                                                                                                                                                                                                                                                                                                                                                                                                                                                                                                                                                                                                                                                                                                                                                                                                                                                                                                                                                                                                                                                                                                                                                                                                                                                                                                                                               |
| yellow | BP      | GO:0022900 | electron transport chain                     | 17735       | 151             | 1225   | 27          | 10.62    | 6.00E-06 | 2.542373   | ATP5D;ATP5H;COQ7;COX4I1;CYB561D2;CYC1;ETFB;FADS3;FDX1L;FDXR;NDUFA11;NDUFA13;NDUFA3;NDUF                                                                                                                                                                                                                                                                                                                                                                                                                                                                                                                                                                                                                                                                                                                                                                                                                                                                                                                                                                                                                                                                                                                                                                                                                                                                                                                                                                                                                                                                                                                                                                                                                                                                                                                                                                                                                                                                                                                                                                                                                                                                                                                                                                                                                                                                                                                                                                                                                                                                                                                                                                                                                                                                                                                                                                                                                                                                                                                                                                                                                                                                                                                                                                                                                                                                                                                                                                                                                                                                                                                 |
| yellow | CC      | GO:0070013 | intracellular organelle lumen                | 17735       | 2677            | 1225   | 236         | 181.68   | 6.20E-06 | 1.298987   | ABCB8;ABT1;ACADS;ACOT8;ADHFE1;ADPRHL2;AK4;ANAPC11;ANAPC2;APL2;ARFGEF1;ARNTL;ATF4;ATF7IP;                                                                                                                                                                                                                                                                                                                                                                                                                                                                                                                                                                                                                                                                                                                                                                                                                                                                                                                                                                                                                                                                                                                                                                                                                                                                                                                                                                                                                                                                                                                                                                                                                                                                                                                                                                                                                                                                                                                                                                                                                                                                                                                                                                                                                                                                                                                                                                                                                                                                                                                                                                                                                                                                                                                                                                                                                                                                                                                                                                                                                                                                                                                                                                                                                                                                                                                                                                                                                                                                                                                |
| yellow | BP      | GO:0043412 | macromolecule modification                   | 17735       | 2584            | 1225   | 235         | 181.79   | 7.10E-06 | 1.2927     | ADAM9;ADORA2A;ALG12;ALS2;ANAPC11;ANAPC2;APOE;ARFGEF1;ARIH1;ASB3;ASB6;ATF4;ATF7IP;AVP11;B3                                                                                                                                                                                                                                                                                                                                                                                                                                                                                                                                                                                                                                                                                                                                                                                                                                                                                                                                                                                                                                                                                                                                                                                                                                                                                                                                                                                                                                                                                                                                                                                                                                                                                                                                                                                                                                                                                                                                                                                                                                                                                                                                                                                                                                                                                                                                                                                                                                                                                                                                                                                                                                                                                                                                                                                                                                                                                                                                                                                                                                                                                                                                                                                                                                                                                                                                                                                                                                                                                                               |
| yellow | CC      | GO:0005747 | mitochondrial respiratory chain complex ...  | 17735       | 46              | 1225   | 13          | 3.12     | 7.50E-06 | 4.166667   | NDUFA11;NDUFA13;NDUFA3;NDUFA8;NDUFB10;NDUFB11;NDUFB7;NDUFB8;NDUFB9;NDUFS6;NDUFS7;ND                                                                                                                                                                                                                                                                                                                                                                                                                                                                                                                                                                                                                                                                                                                                                                                                                                                                                                                                                                                                                                                                                                                                                                                                                                                                                                                                                                                                                                                                                                                                                                                                                                                                                                                                                                                                                                                                                                                                                                                                                                                                                                                                                                                                                                                                                                                                                                                                                                                                                                                                                                                                                                                                                                                                                                                                                                                                                                                                                                                                                                                                                                                                                                                                                                                                                                                                                                                                                                                                                                                     |
| yellow | CC      | GO:0030964 | NADH dehydrogenase complex                   | 17735       | 46              | 1225   | 13          | 3.12     | 7.50E-06 | 4.166667   | NDUFA11;NDUFA13;NDUFA3;NDUFA8;NDUFB10;NDUFB11;NDUFB7;NDUFB8;NDUFB9;NDUFS6;NDUFS7;ND                                                                                                                                                                                                                                                                                                                                                                                                                                                                                                                                                                                                                                                                                                                                                                                                                                                                                                                                                                                                                                                                                                                                                                                                                                                                                                                                                                                                                                                                                                                                                                                                                                                                                                                                                                                                                                                                                                                                                                                                                                                                                                                                                                                                                                                                                                                                                                                                                                                                                                                                                                                                                                                                                                                                                                                                                                                                                                                                                                                                                                                                                                                                                                                                                                                                                                                                                                                                                                                                                                                     |
| yellow | CC      | GO:0045271 | respiratory chain complex I                  | 17735       | 46              | 1225   | 13          | 3.12     | 7.50E-06 | 4.166667   | NDUFA11;NDUFA13;NDUFA3;NDUFA8;NDUFB10;NDUFB11;NDUFB7;NDUFB8;NDUFB9;NDUFS6;NDUFS7;ND                                                                                                                                                                                                                                                                                                                                                                                                                                                                                                                                                                                                                                                                                                                                                                                                                                                                                                                                                                                                                                                                                                                                                                                                                                                                                                                                                                                                                                                                                                                                                                                                                                                                                                                                                                                                                                                                                                                                                                                                                                                                                                                                                                                                                                                                                                                                                                                                                                                                                                                                                                                                                                                                                                                                                                                                                                                                                                                                                                                                                                                                                                                                                                                                                                                                                                                                                                                                                                                                                                                     |
| yellow | BP      | GO:0044267 | cellular protein metabolic process           | 17735       | 3210            | 1225   | 283         | 225.83   | 7.60E-06 | 1.253155   | ADAM9;ADORA2A;AIP;ALG12;ALS2;ANAPC11;ANAPC2;APOE;ARFGEF1;ARIH1;ASB3;ASB6;ATF4;AVP11;B3GAL                                                                                                                                                                                                                                                                                                                                                                                                                                                                                                                                                                                                                                                                                                                                                                                                                                                                                                                                                                                                                                                                                                                                                                                                                                                                                                                                                                                                                                                                                                                                                                                                                                                                                                                                                                                                                                                                                                                                                                                                                                                                                                                                                                                                                                                                                                                                                                                                                                                                                                                                                                                                                                                                                                                                                                                                                                                                                                                                                                                                                                                                                                                                                                                                                                                                                                                                                                                                                                                                                                               |
| yellow | BP      | GO:0046386 | deoxyribose phosphate catabolic process      | 17735       | 17              | 1225   | 8           | 1.2      | 8.00E-06 | 6.666667   | MPG;MUTYH;NTSC;NTHL1;NUDT1;NUDT18;OGG1;PGM2                                                                                                                                                                                                                                                                                                                                                                                                                                                                                                                                                                                                                                                                                                                                                                                                                                                                                                                                                                                                                                                                                                                                                                                                                                                                                                                                                                                                                                                                                                                                                                                                                                                                                                                                                                                                                                                                                                                                                                                                                                                                                                                                                                                                                                                                                                                                                                                                                                                                                                                                                                                                                                                                                                                                                                                                                                                                                                                                                                                                                                                                                                                                                                                                                                                                                                                                                                                                                                                                                                                                                             |
| yellow | MF      | GO:0016853 | isomerase activity                           | 17735       | 138             | 1225   | 25          | 9.67     | 9.80E-06 | 2.585315   | DDT;DSE;ECI1;EHHADH;ERP29;ERP44;FKBP11;FKBP2;ISYNA1;MRI1;MUT;PBLD;PGM2;PIN1;PMM11;PTGES2;P                                                                                                                                                                                                                                                                                                                                                                                                                                                                                                                                                                                                                                                                                                                                                                                                                                                                                                                                                                                                                                                                                                                                                                                                                                                                                                                                                                                                                                                                                                                                                                                                                                                                                                                                                                                                                                                                                                                                                                                                                                                                                                                                                                                                                                                                                                                                                                                                                                                                                                                                                                                                                                                                                                                                                                                                                                                                                                                                                                                                                                                                                                                                                                                                                                                                                                                                                                                                                                                                                                              |
| yellow | CC      | GO:0005759 | mitochondrial matrix                         | 17735       | 286             | 1225   | 40          | 19.41    | 1.00E-05 | 2.060793   | ACADS;ADHFE1;ADPRHL2;AK4;ATP5D;C1QB2;CLPP;DDX28;DGUOK;DTYMK;ECI1;ETFB;FDX1L;FDXR;FPGS;GCI                                                                                                                                                                                                                                                                                                                                                                                                                                                                                                                                                                                                                                                                                                                                                                                                                                                                                                                                                                                                                                                                                                                                                                                                                                                                                                                                                                                                                                                                                                                                                                                                                                                                                                                                                                                                                                                                                                                                                                                                                                                                                                                                                                                                                                                                                                                                                                                                                                                                                                                                                                                                                                                                                                                                                                                                                                                                                                                                                                                                                                                                                                                                                                                                                                                                                                                                                                                                                                                                                                               |
| yellow | CC      | GO:0043233 | organelle lumen                              | 17735       | 2722            | 1225   | 238         | 184.74   | 1.00E-05 | 1.288297   | ABCB8;ABT1;ACADS;ACOT8;ADHFE1;ADPRHL2;AK4;ANAPC11;ANAPC2;APL2;ARFGEF1;ARNTL;ATF4;ATF7IP;                                                                                                                                                                                                                                                                                                                                                                                                                                                                                                                                                                                                                                                                                                                                                                                                                                                                                                                                                                                                                                                                                                                                                                                                                                                                                                                                                                                                                                                                                                                                                                                                                                                                                                                                                                                                                                                                                                                                                                                                                                                                                                                                                                                                                                                                                                                                                                                                                                                                                                                                                                                                                                                                                                                                                                                                                                                                                                                                                                                                                                                                                                                                                                                                                                                                                                                                                                                                                                                                                                                |
| yellow | CC      | GO:0032991 | macromolecular complex                       | 17735       | 3893            | 1225   | 324         | 264.21   | 1.20E-05 | 1.226297   | ABCB8;ABCB9;ABT1;ACTR1B;ACTR3;AFTPH;ALS2;ANAPC11;ANAPC2;APOE;ARFGEF1;ARIH1;ASB3;ASB6;ATF4;AVP11;B3GAL                                                                                                                                                                                                                                                                                                                                                                                                                                                                                                                                                                                                                                                                                                                                                                                                                                                                                                                                                                                                                                                                                                                                                                                                                                                                                                                                                                                                                                                                                                                                                                                                                                                                                                                                                                                                                                                                                                                                                                                                                                                                                                                                                                                                                                                                                                                                                                                                                                                                                                                                                                                                                                                                                                                                                                                                                                                                                                                                                                                                                                                                                                                                                                                                                                                                                                                                                                                                                                                                                                   |
| yellow | CC      | GO:0031966 | mitochondrial membrane                       | 17735       | 496             | 1225   | 59          | 33.66    | 1.70E-05 | 1.752822   | ABCB8;ACADS;ACSL3;ATAD3B;ATP5D;ATP5G2;ATP5G3;ATP5H;BCS1L;BOK;CCS;CDS2;COQ7;COX4I1;CPT1C;C                                                                                                                                                                                                                                                                                                                                                                                                                                                                                                                                                                                                                                                                                                                                                                                                                                                                                                                                                                                                                                                                                                                                                                                                                                                                                                                                                                                                                                                                                                                                                                                                                                                                                                                                                                                                                                                                                                                                                                                                                                                                                                                                                                                                                                                                                                                                                                                                                                                                                                                                                                                                                                                                                                                                                                                                                                                                                                                                                                                                                                                                                                                                                                                                                                                                                                                                                                                                                                                                                                               |
| yellow | BP      | GO:0019692 | deoxyribose phosphate metabolic process      | 17735       | 30              | 1225   | 10          | 2.11     | 2.30E-05 | 4.739336   | DGUOK;MPG;MUTYH;NTSC;NTHL1;NUDT1;NUDT18;OGG1;PGM2                                                                                                                                                                                                                                                                                                                                                                                                                                                                                                                                                                                                                                                                                                                                                                                                                                                                                                                                                                                                                                                                                                                                                                                                                                                                                                                                                                                                                                                                                                                                                                                                                                                                                                                                                                                                                                                                                                                                                                                                                                                                                                                                                                                                                                                                                                                                                                                                                                                                                                                                                                                                                                                                                                                                                                                                                                                                                                                                                                                                                                                                                                                                                                                                                                                                                                                                                                                                                                                                                                                                                       |
| yellow | CC      | GO:0005840 | ribosome                                     | 17735       | 206             | 1225   | 31          | 13.98    | 2.40E-05 | 2.217454   | CANX;GNB2L1;LARP4B;MRPL12;MRPL20;MRPL23;MRPL24;MRPL38;MRPL52;MRPL54;MRPL55;MRP51;MRI                                                                                                                                                                                                                                                                                                                                                                                                                                                                                                                                                                                                                                                                                                                                                                                                                                                                                                                                                                                                                                                                                                                                                                                                                                                                                                                                                                                                                                                                                                                                                                                                                                                                                                                                                                                                                                                                                                                                                                                                                                                                                                                                                                                                                                                                                                                                                                                                                                                                                                                                                                                                                                                                                                                                                                                                                                                                                                                                                                                                                                                                                                                                                                                                                                                                                                                                                                                                                                                                                                                    |
| yellow | BP      | GO:0022904 | respiratory electron transport chain         | 17735       | 111             | 1225   | 21          | 7.81     | 2.70E-05 | 2.68886    | ATP5D;ATP5H;COQ7;COX4I1;CYC1;ETFB;NDUFA11;NDUFA13;NDUFA3;NDUFA8;NDUFB10;NDUFB11;NDUFB                                                                                                                                                                                                                                                                                                                                                                                                                                                                                                                                                                                                                                                                                                                                                                                                                                                                                                                                                                                                                                                                                                                                                                                                                                                                                                                                                                                                                                                                                                                                                                                                                                                                                                                                                                                                                                                                                                                                                                                                                                                                                                                                                                                                                                                                                                                                                                                                                                                                                                                                                                                                                                                                                                                                                                                                                                                                                                                                                                                                                                                                                                                                                                                                                                                                                                                                                                                                                                                                                                                   |
| yellow | BP      | GO:0006974 | response to DNA damage stimulus              | 17735       | 608             | 1225   | 70          | 42.77    | 2.80E-05 | 1.636661   | ATRIP;BABAM1;C11orf30;C17orf70;C1orf86;CIB1;CLSPN;ERCC1;FANCG;FEM18;FNIP2;GTF2H2D;HINFP                                                                                                                                                                                                                                                                                                                                                                                                                                                                                                                                                                                                                                                                                                                                                                                                                                                                                                                                                                                                                                                                                                                                                                                                                                                                                                                                                                                                                                                                                                                                                                                                                                                                                                                                                                                                                                                                                                                                                                                                                                                                                                                                                                                                                                                                                                                                                                                                                                                                                                                                                                                                                                                                                                                                                                                                                                                                                                                                                                                                                                                                                                                                                                                                                                                                                                                                                                                                                                                                                                                 |
| yellow | MF      | GO:0016655 | oxidoreductase activity, acting on NAD(P)... | 17735       | 58              | 1225   | 14          | 4.06     | 3.50E-05 | 3.448276   | CBR1;DCXR;DHRS4;NDUFA13;NDUFA3;NDUFA8;NDUFB10;NDUFB7;NDUFB8;NDUFB9;NDUFS6;NDUFS7;NDL                                                                                                                                                                                                                                                                                                                                                                                                                                                                                                                                                                                                                                                                                                                                                                                                                                                                                                                                                                                                                                                                                                                                                                                                                                                                                                                                                                                                                                                                                                                                                                                                                                                                                                                                                                                                                                                                                                                                                                                                                                                                                                                                                                                                                                                                                                                                                                                                                                                                                                                                                                                                                                                                                                                                                                                                                                                                                                                                                                                                                                                                                                                                                                                                                                                                                                                                                                                                                                                                                                                    |
| yellow | MF      | GO:0016740 | transferase activity                         | 17735       | 1705            | 1225   | 161         | 119.46   | 3.50E-05 | 1.347731   | ADCK5;AK1;AK4;ALG12;AMT;APRT;ASH1L;B3GALT6;B3GALT7;B4GALNT4;B4GALNT6;B4GALT7;BMP2K;BRAF;BL                                                                                                                                                                                                                                                                                                                                                                                                                                                                                                                                                                                                                                                                                                                                                                                                                                                                                                                                                                                                                                                                                                                                                                                                                                                                                                                                                                                                                                                                                                                                                                                                                                                                                                                                                                                                                                                                                                                                                                                                                                                                                                                                                                                                                                                                                                                                                                                                                                                                                                                                                                                                                                                                                                                                                                                                                                                                                                                                                                                                                                                                                                                                                                                                                                                                                                                                                                                                                                                                                                              |
| yellow | MF      | GO:0008168 | methyltransferase activity                   | 17735       | 177             | 1225   | 28          | 12.4     | 4.00E-05 | 2.258065   | AMT;ASH1L;COMTD1;FBL;GAMT;LCMT1;METTL12;METTL22;MGMT;MLL3;MLL5;NSUN5;NSUN5P2;PEMT;PN                                                                                                                                                                                                                                                                                                                                                                                                                                                                                                                                                                                                                                                                                                                                                                                                                                                                                                                                                                                                                                                                                                                                                                                                                                                                                                                                                                                                                                                                                                                                                                                                                                                                                                                                                                                                                                                                                                                                                                                                                                                                                                                                                                                                                                                                                                                                                                                                                                                                                                                                                                                                                                                                                                                                                                                                                                                                                                                                                                                                                                                                                                                                                                                                                                                                                                                                                                                                                                                                                                                    |
| yellow | BP      | GO:0006281 | DNA repair                                   | 17735       | 388             | 1225   | 49          | 27.3     | 4.60E-05 | 1.794872   | ATRIP;BABAM1;C11orf30;C17orf70;C1orf86;CIB1;CLSPN;ERCC1;FANCG;GTF2H2D;HINFP;INO80E;MC1R;MCF                                                                                                                                                                                                                                                                                                                                                                                                                                                                                                                                                                                                                                                                                                                                                                                                                                                                                                                                                                                                                                                                                                                                                                                                                                                                                                                                                                                                                                                                                                                                                                                                                                                                                                                                                                                                                                                                                                                                                                                                                                                                                                                                                                                                                                                                                                                                                                                                                                                                                                                                                                                                                                                                                                                                                                                                                                                                                                                                                                                                                                                                                                                                                                                                                                                                                                                                                                                                                                                                                                             |
| yellow | BP      | GO:0009264 | deoxyribonucleotide catabolic process        | 17735       | 16              | 1225   | 7           | 1.13     | 5.40E-05 | 6.19469    | MPG;MUTYH;NTSC;NTHL1;NUDT1;NUDT18;OGG1                                                                                                                                                                                                                                                                                                                                                                                                                                                                                                                                                                                                                                                                                                                                                                                                                                                                                                                                                                                                                                                                                                                                                                                                                                                                                                                                                                                                                                                                                                                                                                                                                                                                                                                                                                                                                                                                                                                                                                                                                                                                                                                                                                                                                                                                                                                                                                                                                                                                                                                                                                                                                                                                                                                                                                                                                                                                                                                                                                                                                                                                                                                                                                                                                                                                                                                                                                                                                                                                                                                                                                  |
| yellow | CC      | GO:0005746 | mitochondrial respiratory chain              | 17735       | 70              | 1225   | 15          | 4.75     | 5.70E-05 | 3.157895   | BCS1L;NDUFA11;NDUFA13;NDUFA3;NDUFA8;NDUFB10;NDUFB11;NDUFB7;NDUFB8;NDUFB9;NDUFS6;NDU                                                                                                                                                                                                                                                                                                                                                                                                                                                                                                                                                                                                                                                                                                                                                                                                                                                                                                                                                                                                                                                                                                                                                                                                                                                                                                                                                                                                                                                                                                                                                                                                                                                                                                                                                                                                                                                                                                                                                                                                                                                                                                                                                                                                                                                                                                                                                                                                                                                                                                                                                                                                                                                                                                                                                                                                                                                                                                                                                                                                                                                                                                                                                                                                                                                                                                                                                                                                                                                                                                                     |
| yellow | CC      | GO:0044455 | mitochondrial membrane part                  | 17735       | 148             | 1225   | 24          | 10.04    | 5.80E-05 | 2.390438   | ATP5D;ATP5G2;ATP5G3;ATP5H;BCS1L;NDUFA11;NDUFA13;NDUFA3;NDUFA8;NDUFB10;NDUFB11;NDUFB7;                                                                                                                                                                                                                                                                                                                                                                                                                                                                                                                                                                                                                                                                                                                                                                                                                                                                                                                                                                                                                                                                                                                                                                                                                                                                                                                                                                                                                                                                                                                                                                                                                                                                                                                                                                                                                                                                                                                                                                                                                                                                                                                                                                                                                                                                                                                                                                                                                                                                                                                                                                                                                                                                                                                                                                                                                                                                                                                                                                                                                                                                                                                                                                                                                                                                                                                                                                                                                                                                                                                   |
| yellow | CC      | GO:0031090 | organelle membrane                           | 17735       | 2366            | 1225   | 206         | 160.58   | 6.10E-05 | 1.28285    | ABCB8;ABCB9;ACADS;ACER3;ACSL3;ACTR3;AFTPH;ALG12;AP1G1;AP1G2;AP1S1;APPL2;ARFGEF1;ASPSCR1;A                                                                                                                                                                                                                                                                                                                                                                                                                                                                                                                                                                                                                                                                                                                                                                                                                                                                                                                                                                                                                                                                                                                                                                                                                                                                                                                                                                                                                                                                                                                                                                                                                                                                                                                                                                                                                                                                                                                                                                                                                                                                                                                                                                                                                                                                                                                                                                                                                                                                                                                                                                                                                                                                                                                                                                                                                                                                                                                                                                                                                                                                                                                                                                                                                                                                                                                                                                                                                                                                                                               |
| yellow | CC      | GO:0070469 | respiratory chain                            | 17735       | 79              | 1225   | 16          | 5.36     | 6.70E-05 | 2.985075   | BCS1L;CYC1;NDUFA11;NDUFA13;NDUFA3;NDUFA8;NDUFB10;NDUFB11;NDUFB7;NDUFB8;NDUFB9;NDUFS6;NDU                                                                                                                                                                                                                                                                                                                                                                                                                                                                                                                                                                                                                                                                                                                                                                                                                                                                                                                                                                                                                                                                                                                                                                                                                                                                                                                                                                                                                                                                                                                                                                                                                                                                                                                                                                                                                                                                                                                                                                                                                                                                                                                                                                                                                                                                                                                                                                                                                                                                                                                                                                                                                                                                                                                                                                                                                                                                                                                                                                                                                                                                                                                                                                                                                                                                                                                                                                                                                                                                                                                |
| yellow | MF      | GO:0016741 | transferase activity, transferring one-c...  | 17735       | 183             | 1225   | 28          | 12.82    | 7.40E-05 | 2.184087   | AMT;ASH1L;COMTD1;FBL;GAMT;LCMT1;METTL12;METTL22;MGMT;MLL3;MLL5;NSUN5;NSUN5P2;PEMT;PN                                                                                                                                                                                                                                                                                                                                                                                                                                                                                                                                                                                                                                                                                                                                                                                                                                                                                                                                                                                                                                                                                                                                                                                                                                                                                                                                                                                                                                                                                                                                                                                                                                                                                                                                                                                                                                                                                                                                                                                                                                                                                                                                                                                                                                                                                                                                                                                                                                                                                                                                                                                                                                                                                                                                                                                                                                                                                                                                                                                                                                                                                                                                                                                                                                                                                                                                                                                                                                                                                                                    |
| yellow | BP      | GO:0002832 | negative regulation of response to bioti...  | 17735       | 12              | 1225   | 6           | 0.84     | 7.60E-05 | 7.142857   | C1QB2;MIBC;NFKB1L1;PRDM1;SIGIRR;TNFAIP3                                                                                                                                                                                                                                                                                                                                                                                                                                                                                                                                                                                                                                                                                                                                                                                                                                                                                                                                                                                                                                                                                                                                                                                                                                                                                                                                                                                                                                                                                                                                                                                                                                                                                                                                                                                                                                                                                                                                                                                                                                                                                                                                                                                                                                                                                                                                                                                                                                                                                                                                                                                                                                                                                                                                                                                                                                                                                                                                                                                                                                                                                                                                                                                                                                                                                                                                                                                                                                                                                                                                                                 |
| yellow | BP      | GO:0009394 | 2'-deoxyribonucleotide metabolic process     | 17735       | 28              | 1225   | 9           | 1.97     | 8.30E-05 | 4.568528   | DGUOK;MPG;MUTYH;NTSC;NTHL1;NUDT1;NUDT18;OGG1                                                                                                                                                                                                                                                                                                                                                                                                                                                                                                                                                                                                                                                                                                                                                                                                                                                                                                                                                                                                                                                                                                                                                                                                                                                                                                                                                                                                                                                                                                                                                                                                                                                                                                                                                                                                                                                                                                                                                                                                                                                                                                                                                                                                                                                                                                                                                                                                                                                                                                                                                                                                                                                                                                                                                                                                                                                                                                                                                                                                                                                                                                                                                                                                                                                                                                                                                                                                                                                                                                                                                            |
| yellow | CC      | GO:0044464 | cell part                                    | 17735       | 14451           | 1225   | 1022        | 980.77   | 8.30E-05 | 1.042038   | ABCB8;ABCB9;ABHD14A;ABT1;ACADS;ACER3;ACOT8;ACPS;ACSL3;ACTR1B;ACTR3;ADAM12;ADAM9;ADAMT                                                                                                                                                                                                                                                                                                                                                                                                                                                                                                                                                                                                                                                                                                                                                                                                                                                                                                                                                                                                                                                                                                                                                                                                                                                                                                                                                                                                                                                                                                                                                                                                                                                                                                                                                                                                                                                                                                                                                                                                                                                                                                                                                                                                                                                                                                                                                                                                                                                                                                                                                                                                                                                                                                                                                                                                                                                                                                                                                                                                                                                                                                                                                                                                                                                                                                                                                                                                                                                                                                                   |
| yellow | CC      | GO:0005623 | cell                                         | 17735       | 14452           | 1225   | 1022        | 980.83   | 8.50E-05 | 1.041975   | ABCB8;ABCB9;ABHD14A;ABT1;ACADS;ACER3;ACOT8;ACPS;ACSL3;ACTR1B;ACTR3;ADAM12;ADAM9;ADAMT                                                                                                                                                                                                                                                                                                                                                                                                                                                                                                                                                                                                                                                                                                                                                                                                                                                                                                                                                                                                                                                                                                                                                                                                                                                                                                                                                                                                                                                                                                                                                                                                                                                                                                                                                                                                                                                                                                                                                                                                                                                                                                                                                                                                                                                                                                                                                                                                                                                                                                                                                                                                                                                                                                                                                                                                                                                                                                                                                                                                                                                                                                                                                                                                                                                                                                                                                                                                                                                                                                                   |
| yellow | CC      | GO:0044391 | ribosomal subunit                            | 17735       | 134             | 1225   | 22          | 9.09     | 9.60E-05 | 2.420242   | GNB2L1;MRPL12;MRPL23;MRPL52;MRPL55;MRP51;MRP52;MRP53;MRP54;MRP55;MRP56;MRP57;MRP58;MRP59;MRP60;MRP61;MRP62;MRP63;MRP64;MRP65;MRP66;MRP67;MRP68;MRP69;MRP70;MRP71;MRP72;MRP73;MRP74;MRP75;MRP76;MRP77;MRP78;MRP79;MRP80;MRP81;MRP82;MRP83;MRP84;MRP85;MRP86;MRP87;MRP88;MRP89;MRP90;MRP91;MRP92;MRP93;MRP94;MRP95;MRP96;MRP97;MRP98;MRP99;MRP100;MRP101;MRP102;MRP103;MRP104;MRP105;MRP106;MRP107;MRP108;MRP109;MRP110;MRP111;MRP112;MRP113;MRP114;MRP115;MRP116;MRP117;MRP118;MRP119;MRP120;MRP121;MRP122;MRP123;MRP124;MRP125;MRP126;MRP127;MRP128;MRP129;MRP130;MRP131;MRP132;MRP133;MRP134;MRP135;MRP136;MRP137;MRP138;MRP139;MRP140;MRP141;MRP142;MRP143;MRP144;MRP145;MRP146;MRP147;MRP148;MRP149;MRP150;MRP151;MRP152;MRP153;MRP154;MRP155;MRP156;MRP157;MRP158;MRP159;MRP160;MRP161;MRP162;MRP163;MRP164;MRP165;MRP166;MRP167;MRP168;MRP169;MRP170;MRP171;MRP172;MRP173;MRP174;MRP175;MRP176;MRP177;MRP178;MRP179;MRP180;MRP181;MRP182;MRP183;MRP184;MRP185;MRP186;MRP187;MRP188;MRP189;MRP190;MRP191;MRP192;MRP193;MRP194;MRP195;MRP196;MRP197;MRP198;MRP199;MRP200;MRP201;MRP202;MRP203;MRP204;MRP205;MRP206;MRP207;MRP208;MRP209;MRP210;MRP211;MRP212;MRP213;MRP214;MRP215;MRP216;MRP217;MRP218;MRP219;MRP220;MRP221;MRP222;MRP223;MRP224;MRP225;MRP226;MRP227;MRP228;MRP229;MRP230;MRP231;MRP232;MRP233;MRP234;MRP235;MRP236;MRP237;MRP238;MRP239;MRP240;MRP241;MRP242;MRP243;MRP244;MRP245;MRP246;MRP247;MRP248;MRP249;MRP250;MRP251;MRP252;MRP253;MRP254;MRP255;MRP256;MRP257;MRP258;MRP259;MRP260;MRP261;MRP262;MRP263;MRP264;MRP265;MRP266;MRP267;MRP268;MRP269;MRP270;MRP271;MRP272;MRP273;MRP274;MRP275;MRP276;MRP277;MRP278;MRP279;MRP280;MRP281;MRP282;MRP283;MRP284;MRP285;MRP286;MRP287;MRP288;MRP289;MRP290;MRP291;MRP292;MRP293;MRP294;MRP295;MRP296;MRP297;MRP298;MRP299;MRP300;MRP301;MRP302;MRP303;MRP304;MRP305;MRP306;MRP307;MRP308;MRP309;MRP310;MRP311;MRP312;MRP313;MRP314;MRP315;MRP316;MRP317;MRP318;MRP319;MRP320;MRP321;MRP322;MRP323;MRP324;MRP325;MRP326;MRP327;MRP328;MRP329;MRP330;MRP331;MRP332;MRP333;MRP334;MRP335;MRP336;MRP337;MRP338;MRP339;MRP340;MRP341;MRP342;MRP343;MRP344;MRP345;MRP346;MRP347;MRP348;MRP349;MRP350;MRP351;MRP352;MRP353;MRP354;MRP355;MRP356;MRP357;MRP358;MRP359;MRP360;MRP361;MRP362;MRP363;MRP364;MRP365;MRP366;MRP367;MRP368;MRP369;MRP370;MRP371;MRP372;MRP373;MRP374;MRP375;MRP376;MRP377;MRP378;MRP379;MRP380;MRP381;MRP382;MRP383;MRP384;MRP385;MRP386;MRP387;MRP388;MRP389;MRP390;MRP391;MRP392;MRP393;MRP394;MRP395;MRP396;MRP397;MRP398;MRP399;MRP400;MRP401;MRP402;MRP403;MRP404;MRP405;MRP406;MRP407;MRP408;MRP409;MRP410;MRP411;MRP412;MRP413;MRP414;MRP415;MRP416;MRP417;MRP418;MRP419;MRP420;MRP421;MRP422;MRP423;MRP424;MRP425;MRP426;MRP427;MRP428;MRP429;MRP430;MRP431;MRP432;MRP433;MRP434;MRP435;MRP436;MRP437;MRP438;MRP439;MRP440;MRP441;MRP442;MRP443;MRP444;MRP445;MRP446;MRP447;MRP448;MRP449;MRP450;MRP451;MRP452;MRP453;MRP454;MRP455;MRP456;MRP457;MRP458;MRP459;MRP460;MRP461;MRP462;MRP463;MRP464;MRP465;MRP466;MRP467;MRP468;MRP469;MRP470;MRP471;MRP472;MRP473;MRP474;MRP475;MRP476;MRP477;MRP478;MRP479;MRP480;MRP481;MRP482;MRP483;MRP484;MRP485;MRP486;MRP487;MRP488;MRP489;MRP490;MRP491;MRP492;MRP493;MRP494;MRP495;MRP496;MRP497;MRP498;MRP499;MRP500;MRP501;MRP502;MRP503;MRP504;MRP505;MRP506;MRP507;MRP508;MRP509;MRP510;MRP511;MRP512;MRP513;MRP514;MRP515;MRP516;MRP517;MRP518;MRP519;MRP520;MRP521;MRP522;MRP523;MRP524;MRP525;MRP526;MRP527;MRP528;MRP529;MRP530;MRP531;MRP532;MRP533;MRP534;MRP535;MRP536;MRP537;MRP538;MRP539;MRP540;MRP541;MRP542;MRP543;MRP544;MRP545;MRP546;MRP54 |

|        |    |             |                                               |       |      |      |     |        |          |          |                                                                                                 |
|--------|----|-------------|-----------------------------------------------|-------|------|------|-----|--------|----------|----------|-------------------------------------------------------------------------------------------------|
| yellow | BP | GO:0009262  | deoxyribonucleotide metabolic process         | 17735 | 33   | 1225 | 9   | 2.32   | 0.00034  | 3.87931  | DGUOK;DTYMK;MPG;MUTYH;NT5C;NTHL1;NUDT1;NUDT18;OGG1                                              |
| yellow | CC | GO:0005758  | mitochondrial intermembrane space             | 17735 | 49   | 1225 | 11  | 3.33   | 0.00036  | 3.30303  | CHCHD5;DTYMK;GFER;GOLPH3;NDUFA8;NDUFB7;NME4;PPOX;STOML2;TIMM10;TIMM11                           |
| yellow | BP | GO:0016310  | phosphorylation                               | 17735 | 1280 | 1225 | 121 | 90.05  | 4.00E-04 | 1.343698 | ADAM9;ADORA2A;ALS2;ANAPC2;APOE;ATF4;ATP5D;AVP11;BRA;C19orf10;CCNL2;CD36;CDC25A;CDC6;CDK1        |
| yellow | BP | GO:00045333 | cellular respiration                          | 17735 | 162  | 1225 | 24  | 11.4   | 0.00041  | 2.105263 | ATP5D;CAPRIN1;DALRD3;EEF1D;EEF1G;EIF1;EIF2B2;EIF2B4;EIF3F;EIF3G;EIF3H;EIF4G3;ETF1;GNB2L1;LA     |
| yellow | MF | GO:0016651  | oxidoreductase activity, acting on NAD(P...   | 17735 | 98   | 1225 | 17  | 6.87   | 0.00043  | 2.474527 | CBR1;DCX;DHDH;DHRS4;NDOR1;NDUFA13;NDUFA3;NDUFA8;NDUFB10;NDUFB7;NDUFB8;NDUFB9;NDUFS              |
| yellow | MF | GO:0016866  | intramolecular transferase activity           | 17735 | 28   | 1225 | 8   | 1.96   | 5.00E-04 | 4.081633 | MUT;PGM2;PMM1;PUS1;RPSD1;RPSD3;TRUB2                                                            |
| yellow | BP | GO:00045184 | establishment of protein localization         | 17735 | 1288 | 1225 | 121 | 90.61  | 0.00051  | 1.335393 | ABC89;ACSL3;ADAM9;ADORA2A;AFTPH;AHCYL1;AIP;AP1G1;AP1G2;AP1S1;ARFGFE1;ARFRP1;ARNTL;ASPSCR        |
| yellow | MF | GO:0005085  | guanyl-nucleotide exchange factor activi...   | 17735 | 176  | 1225 | 25  | 12.33  | 0.00056  | 2.027575 | ALS2;ARFGFE1;ARHGFE25;ARHGFE26;DENND2C;EIF2B2;EIF2B4;FGD6;GAPVD1;ITSN2;LAMTOR2;PCP2;PLEKH       |
| yellow | BP | GO:0006412  | translation                                   | 17735 | 464  | 1225 | 52  | 32.64  | 0.00056  | 1.593137 | C1QBP;CAPRIN1;DALRD3;EEF1D;EEF1G;EIF1;EIF2B2;EIF2B4;EIF3F;EIF3G;EIF3H;EIF4G3;ETF1;GNB2L1;LA     |
| yellow | BP | GO:0008104  | protein localization                          | 17735 | 1586 | 1225 | 144 | 111.58 | 0.00065  | 1.290554 | ABC89;ACSL3;ADAM9;ADORA2A;AFTPH;AHCYL1;AIP;AKAP10;ALS2;AP1G1;AP1G2;AP1S1;ARFGFE1;ARFRP1;A       |
| yellow | MF | GO:0016301  | kinase activity                               | 17735 | 762  | 1225 | 77  | 53.39  | 0.00068  | 1.442218 | ADCK5;AK1;AK4;BMP2K;BRAF;BUB1;BUB1B;CDK10;CDK12;CDK13;CNTL1;CSNK1G1;DGUOK;DOLK;DTYMK;EI         |
| yellow | CC | GO:0031967  | organelle envelope                            | 17735 | 825  | 1225 | 80  | 55.99  | 0.00074  | 1.428827 | ABC88;ACADS;ACSL3;ATAD3B;ATP5D;ATP5G2;ATP5G3;ATP5H;BCS1L;BOK;CCS;CDS2;CENPF;CHCHD5;COQ7;I       |
| yellow | BP | GO:0001522  | pseudouridine synthesis                       | 17735 | 17   | 1225 | 6   | 1.2    | 0.00075  | 5        | NHP2;PUS1;PUSL1;RPSD1;RPSD3;TRUB2                                                               |
| yellow | BP | GO:0006150  | mitochondrial electron transport, NADH t...   | 17735 | 44   | 1225 | 10  | 3.1    | 0.00078  | 3.225806 | NDUFA3;NDUFA8;NDUFB10;NDUFB7;NDUFB8;NDUFB9;NDUFS6;NDUFS7;NDUFS8;NDUFV1                          |
| yellow | CC | GO:0031975  | envelope                                      | 17735 | 839  | 1225 | 81  | 56.94  | 0.00078  | 1.42255  | ABC88;ACADS;ACSL3;ATAD3B;ATP5D;ATP5G2;ATP5G3;ATP5H;BCS1L;BOK;CCS;CDS2;CENPF;CHCHD5;COQ7;I       |
| yellow | MF | GO:0051539  | 4 iron, 4 sulfur cluster binding              | 17735 | 37   | 1225 | 9   | 2.59   | 0.00082  | 3.474903 | MUTYH;NARFL;NDUFS7;NDUFS8;NDUFV1;NTHL1;NUBP2;POLD1;RTEL1                                        |
| yellow | BP | GO:0015031  | protein transport                             | 17735 | 1245 | 1225 | 116 | 87.59  | 9.00E-04 | 1.324352 | ABC89;ACSL3;ADAM9;ADORA2A;AFTPH;AHCYL1;AIP;AP1G1;AP1G2;AP1S1;ARFGFE1;ARFRP1;ARNTL;ASPSCR        |
| yellow | BP | GO:0006413  | translational initiation                      | 17735 | 152  | 1225 | 22  | 10.69  | 0.00096  | 2.057998 | EIF1;EIF2B2;EIF2B4;EIF3F;EIF3G;EIF3H;EIF3K;EIF4G3;RPL13;RPL18;RPL18A;RPL28;RPL38;RPL38L;RPLP1;R |
| yellow | BP | GO:0006259  | DNA metabolic process                         | 17735 | 866  | 1225 | 85  | 60.93  | 0.001    | 1.395043 | ASH1L;ATF7IP;ATRIP;BABAM1;C11orf30;C1orf70;C1orf86;CDC25A;CDC6;CENPF;CHT18;CIB1;CLC1;CLSPN      |
| yellow | CC | GO:0031970  | organelle envelope lumen                      | 17735 | 56   | 1225 | 11  | 3.8    | 0.00118  | 2.894737 | CHCHD5;DTYMK;GFER;GOLPH3;NDUFA8;NDUFB7;NME4;PPOX;STOML2;TIMM10;TIMM11                           |
| yellow | BP | GO:0055114  | oxidation-reduction process                   | 17735 | 561  | 1225 | 59  | 39.47  | 0.00121  | 1.494806 | ACADS;ACOT8;APOM;ATP5D;ATP5H;CBR1;COQ7;COX41;CPT1C;CYB561D2;CYC1;CYP11B1;CYP2E1;DCXR;DHF        |
| yellow | MF | GO:0003723  | RNA binding                                   | 17735 | 851  | 1225 | 83  | 59.62  | 0.00123  | 1.39215  | ABT1;ANKRD17;C1QBP;CAPRIN1;CELFF2;CELFF6;CPSF2;CPSF4;CSD1E;DDX21;DDX28;DDX43;DDX49;DNAC17;I     |
| yellow | MF | GO:0016773  | phosphotransferase activity, alcohol gro...   | 17735 | 706  | 1225 | 71  | 49.46  | 0.00124  | 1.435503 | ADCK5;BMP2K;BRAF;BUB1;BUB1B;CDK10;CDK12;CDK13;CNTL1;CSNK1G1;DGUOK;DOLK;ETNK2;FASTK;FUK;I        |
| yellow | MF | GO:0019205  | nucleobase-containing compound kinase ac...   | 17735 | 47   | 1225 | 10  | 3.29   | 0.0013   | 3.039514 | AK1;AK4;DGUOK;DTYMK;MAGI3;NME3;NME4;PNK;UCK1;UCK1L                                              |
| yellow | BP | GO:0007094  | mitotic cell cycle spindle assembly chec...   | 17735 | 32   | 1225 | 8   | 2.25   | 0.00134  | 3.555556 | ANAPC11;ANAPC2;BUB1;BUB1B;CENPF;DYNC1L1;MAD11;TPR                                               |
| yellow | BP | GO:0007191  | mitotic metaphase/anaphase transition         | 17735 | 47   | 1225 | 10  | 3.31   | 0.00134  | 3.021148 | ANAPC11;ANAPC2;BUB1;BUB1B;CENPF;DLGAP5;DYNC1L1;MAD11;RAD21;TPR                                  |
| yellow | BP | GO:0033554  | cellular response to stress                   | 17735 | 1209 | 1225 | 112 | 85.06  | 0.00135  | 1.316718 | APOE;ATF4;ATRIP;BABAM1;C11orf30;C1orf44;C1orf70;C1orf91;C1orf86;CCDC47;CCS;CD36;CIB1;CLSPN      |
| yellow | MF | GO:0003735  | structural constituent of ribosome            | 17735 | 157  | 1225 | 22  | 11     | 0.0014   | 2        | MRPL12;MRPL20;MRPL23;MRPL52;MRPL55;MRPS11;MRPS12;MRPS15;MRPS18A;RPL13;RPL18;RPI                 |
| yellow | CC | GO:0030529  | ribonucleoprotein complex                     | 17735 | 573  | 1225 | 58  | 38.89  | 0.00145  | 1.491386 | ARFGFE1;BTBD6;CANX;CAPRIN1;FBL;GEMIN7;GNB2L1;HNRNP33;IMP4;LARP4B;LSM14A;LSM2;LSM4;MRPL1         |
| yellow | CC | GO:0015934  | large ribosomal subunit                       | 17735 | 75   | 1225 | 13  | 5.09   | 0.00149  | 2.554028 | MRPL12;MRPL23;MRPL52;MRPL55;RPL13;RPL18A;RPL28;RPL29;RPL38;RPL8;RPLP1;RPLP2                     |
| yellow | BP | GO:0007005  | mitochondrion organization                    | 17735 | 230  | 1225 | 29  | 16.18  | 0.00159  | 1.792336 | AIP;BCS1L;C1QBP;COQ7;FANCG;GFER;GIMAP5;GOLPH3;MRPL12;MTFP1;MTM1;NDUFS7;NDUFS8;P2RX7;PA          |
| yellow | BP | GO:00045841 | negative regulation of mitotic metaphase...   | 17735 | 33   | 1225 | 8   | 2.32   | 0.00166  | 3.448276 | ANAPC11;ANAPC2;BUB1;BUB1B;CENPF;DYNC1L1;MAD11;TPR                                               |
| yellow | BP | GO:0071173  | spindle assembly checkpoint                   | 17735 | 33   | 1225 | 8   | 2.32   | 0.00166  | 3.448276 | ANAPC11;ANAPC2;BUB1;BUB1B;CENPF;DYNC1L1;MAD11;TPR                                               |
| yellow | BP | GO:0071704  | organic substance metabolic process           | 17735 | 8996 | 1225 | 677 | 632.89 | 0.00169  | 1.069696 | ABT1;ACADS;ACAP3;ACER3;ACOT8;ACPS;ACSL3;ADAM12;ADAM9;ADAMDEC1;ADAMTS13;ADHFE1;ADNP;AI           |
| yellow | BP | GO:0030071  | regulation of mitotic metaphase/anaphase...   | 17735 | 41   | 1225 | 9   | 2.88   | 0.00184  | 3.125    | ANAPC11;ANAPC2;BUB1;BUB1B;CENPF;DLGAP5;DYNC1L1;MAD11;TPR                                        |
| yellow | MF | GO:0009982  | pseudouridine synthase activity               | 17735 | 14   | 1225 | 5   | 0.98   | 0.00196  | 5.102041 | PUS1;PUSL1;RPSD1;RPSD3;TRUB2                                                                    |
| yellow | CC | GO:0043234  | protein complex                               | 17735 | 3294 | 1225 | 262 | 223.56 | 0.00196  | 1.171945 | ABC88;ABC89;ABT1;ACTR1B;ACTR3;AFTPH;ALS2;ANAPC11;ANAPC2;ANO6;AP1G1;AP1G2;AP1S1;APPL2;ARIH       |
| yellow | CC | GO:0044428  | nuclear part                                  | 17735 | 2482 | 1225 | 203 | 168.45 | 0.00197  | 1.205105 | ABC88;ABT1;ANAPC11;ANAPC2;APPL2;ARFGFE1;ARNTL;ATF4;ATF7IP;ATRIP;BABAM1;BRF1;BRF2;BUB1;BUB       |
| yellow | MF | GO:0016798  | hydrolase activity, acting on glycosyl b...   | 17735 | 112  | 1225 | 17  | 7.85   | 0.00199  | 2.165605 | ACER3;ADPRHL2;ATHL1;CD38;ENGASE;HEXDC;KIAA2018;LYZ;MAN1B1;MOGS;MPG;MUTYH;NAGLU;NEK1;N           |
| yellow | MF | GO:0008757  | S-adenosylmethionine-dependent methyltra...   | 17735 | 103  | 1225 | 16  | 7.22   | 0.00209  | 2.216066 | ASH1L;GAMT;LCMT1;MLL3;MLL5;PEMT;PNMT;PRMT7;RBBP5;SETD2;SETD7;SU420H1;TRMT1;TRMT6;IWS1;TF        |
| yellow | MF | GO:0007510  | N-methyltransferase activity                  | 17735 | 67   | 1225 | 12  | 4.69   | 0.00217  | 2.558635 | ASH1L;MLL3;MLL5;PEMT;PNMT;PRMT7;RBBP5;SETD2;SETD7;SU420H1;TRMT1;TRMT6;IWS1;TF                   |
| yellow | CC | GO:0000313  | organelle ribosome                            | 17735 | 52   | 1225 | 10  | 3.53   | 0.0023   | 2.832861 | MRPL12;MRPL20;MRPL23;MRPL52;MRPL55;MRPS11;MRPS12;MRPS15;MRPS18A;MRPS26                          |
| yellow | CC | GO:0005761  | mitochondrial ribosome                        | 17735 | 52   | 1225 | 10  | 3.53   | 0.0023   | 2.832861 | MRPL12;MRPL20;MRPL23;MRPL52;MRPL55;MRPS11;MRPS12;MRPS15;MRPS18A;MRPS26                          |
| yellow | BP | GO:0071174  | mitotic cell cycle spindle checkpoint         | 17735 | 35   | 1225 | 8   | 2.46   | 0.00249  | 3.252033 | ANAPC11;ANAPC2;BUB1;BUB1B;CENPF;DYNC1L1;MAD11;TPR                                               |
| yellow | MF | GO:0008080  | N-acetyltransferase activity                  | 17735 | 77   | 1225 | 13  | 5.39   | 0.00251  | 2.411874 | ELP4;EPC1;KAT2A;MCRS1;NAA10;NAGS;NAT14;NAT6;NAT9;NCOA3;PHF20;SAT2;TADA3                         |
| yellow | MF | GO:0051536  | iron-sulfur cluster binding                   | 17735 | 61   | 1225 | 11  | 4.27   | 0.0031   | 2.576112 | CISD3;FDX1L;MUTYH;NARFL;NDUFS7;NDUFS8;NDUFV1;NTHL1;NUBP2;POLD1;RTEL1                            |
| yellow | MF | GO:0051540  | metal cluster binding                         | 17735 | 61   | 1225 | 11  | 4.27   | 0.0031   | 2.576112 | CISD3;FDX1L;MUTYH;NARFL;NDUFS7;NDUFS8;NDUFV1;NTHL1;NUBP2;POLD1;RTEL1                            |
| yellow | MF | GO:0008135  | transcription factor activity, nucleic aci... | 17735 | 79   | 1225 | 13  | 5.53   | 0.00317  | 2.350814 | EEF1A2;EEF1D;EEF1G;EIF1;EIF2B2;EIF2B4;EIF3F;EIF3G;EIF3H;EIF3K;EIF4G3;ETF1;TUFW                  |
| yellow | BP | GO:0006479  | protein methylation                           | 17735 | 79   | 1225 | 13  | 5.56   | 0.00328  | 2.338129 | ETF1;KDM3A;KDM6A;LCMT1;MLL3;MLL5;PRMT7;RBBP5;SETD2;SETD7;SU420H1;TRMT112;WHSC1L1                |
| yellow | BP | GO:0008213  | protein alkylation                            | 17735 | 79   | 1225 | 13  | 5.56   | 0.00328  | 2.338129 | ETF1;KDM3A;KDM6A;LCMT1;MLL3;MLL5;PRMT7;RBBP5;SETD2;SETD7;SU420H1;TRMT112;WHSC1L1                |
| yellow | BP | GO:0072594  | establishment of protein localization to...   | 17735 | 210  | 1225 | 26  | 14.77  | 0.00347  | 1.760325 | AIP;CCDC101;GFER;PEX6;RPL13;RPL18;RPL18A;RPL28;RPL29;RPL38;RPL8;RPLP1;RPLP2;RPS15;RPS2;R        |
| yellow | BP | GO:0006996  | organelle organization                        | 17735 | 2139 | 1225 | 181 | 150.48 | 0.00355  | 1.202818 | ACOT8;ACTR3;AIP;ALS2;ANAPC11;ANAPC2;APOE;ARC;ARFGFE1;ARFP2;ARHGAP4;ATL3;ATP6V0E2;ATP6V1C        |
| yellow | BP | GO:0000075  | cell cycle checkpoint                         | 17735 | 243  | 1225 | 29  | 17.1   | 0.00361  | 1.695906 | ANAPC11;ANAPC2;ATRIP;BABAM1;BUB1;BUB1B;CDC25A;CDC6;CENPF;CLSPN;DYNC1L1;E2F1;FANCG;FEM1          |
| yellow | BP | GO:0000281  | cytokinesis after mitosis                     | 17735 | 10   | 1225 | 4   | 0.7    | 0.00363  | 5.714286 | MYH10;NUSAP1;STAMPB;USP8                                                                        |
| yellow | BP | GO:0006793  | phosphorus metabolic process                  | 17735 | 2513 | 1225 | 209 | 176.8  | 0.00377  | 1.182127 | ACAP3;ACER3;ACOT8;ACSL3;ADAM9;ADORA2A;AK1;AK4;ALG12;ALS2;ANAPC2;APOE;APRT;ARFGFE1;ARFRP         |
| yellow | BP | GO:0004238  | primary metabolic process                     | 17735 | 8755 | 1225 | 656 | 615.94 | 0.00422  | 1.065039 | ABT1;ACADS;ACAP3;ACER3;ACOT8;ACSL3;ADAM12;ADAM9;ADAMDEC1;ADAMTS13;ADNP;ADORA2A;AES;A            |
| yellow | BP | GO:0006796  | phosphate-containing compound metabolic ...   | 17735 | 2466 | 1225 | 205 | 173.49 | 0.00423  | 1.181624 | ACAP3;ACER3;ACSL3;ADAM9;ADORA2A;AK1;AK4;ALG12;ALS2;ANAPC2;APOE;APRT;ARFGFE1;ARFRP1;ARHG         |
| yellow | MF | GO:0016627  | oxidoreductase activity, acting on the C...   | 17735 | 55   | 1225 | 10  | 3.85   | 0.00443  | 2.597403 | ACADS;DECR2;DHDH;DUS1L;DUS2L;DUS3L;GCDH;MECR;PPOX;TM7SF2                                        |
| yellow | CC | GO:0000793  | condensed chromosome                          | 17735 | 167  | 1225 | 21  | 11.33  | 0.00457  | 1.853486 | BUB1;BUB1B;CENPF;CENPM;CLASP1;DYNC1L1;MAD11;MKI67;NCAPH;NSMCE1;RAD21;RAD9A;REC                  |
| yellow | MF | GO:0016787  | hydrolase activity                            | 17735 | 2319 | 1225 | 193 | 162.48 | 0.00458  | 1.187839 | ABC88;ABC89;ABHD1;ABHD14A;ACER3;ACOT8;ACPS;ADAM12;ADAM9;ADAMDEC1;ADAMTS13;ADAMTS12              |
| yellow | CC | GO:0005815  | microtubule organizing center                 | 17735 | 482  | 1225 | 48  | 32.71  | 0.00487  | 1.467441 | ACTR1B;ALS2;ATF4;BUB1B;CDC28B;CDC61;CDC48;CEP55;CLASP1;CLIP1;CNTL1;DLGAP5;DYNC1L1;FBXW          |
| yellow | BP | GO:0007059  | chromosome segregation                        | 17735 | 142  | 1225 | 19  | 9.99   | 0.00503  | 1.901902 | BUB1;CDC6;CENPF;CENPT;DLGAP5;LATS1;NCAPH;NIPBL;NUSAP1;RAD21;REC8;SLC25A5;STRF13;TLK2;TOP1       |
| yellow | MF | GO:0036094  | small molecule binding                        | 17735 | 2525 | 1225 | 208 | 176.91 | 0.00509  | 1.175739 | ABC88;ABC89;ABT1;ACADS;ACSL3;ACTR1B;ACTR3;AHCY;AHCYL1;AK1;AK4;APRT;ARFP2;ARFRP1;ARL16;ATA       |
| yellow | BP | GO:0051338  | regulation of transferase activity            | 17735 | 659  | 1225 | 64  | 46.36  | 0.00516  | 1.3805   | ADAM9;ADORA2A;ALS2;ANAPC2;APOE;ATF4;AVP11;BRA;C19orf10;CCNL2;CDC25A;CDC6;CDK12;CLSPN;DI         |
| yellow | BP | GO:0033108  | mitochondrial respiratory chain complex ...   | 17735 | 17   | 1225 | 5   | 1.2    | 0.00517  | 4.166667 | BCS1L;NDUFS7;NDUFS8;SDHAF1;TAZ                                                                  |
| yellow | BP | GO:0034377  | plasma lipoprotein particle assembly          | 17735 | 17   | 1225 | 5   | 1.2    | 0.00517  | 4.166667 | ACSL3;APOE;APOM;SOAT1;SOAT2                                                                     |
| yellow | BP | GO:0065005  | protein-lipid complex assembly                | 17735 | 17   | 1225 | 5   | 1.2    | 0.00517  | 4.166667 | ACSL3;APOE;APOM;SOAT1;SOAT2                                                                     |
| yellow | MF | GO:0044451  | nucleoplasm part                              | 17735 | 823  | 1225 | 75  | 55.86  | 0.00534  | 1.342642 | ABT1;APPL2;ARNTL;ATF4;ATF7IP;BRF1;C17orf49;C1orf86;CCDC101;CCNL2;CDK12;CDK13;CPSF2;CPSF4;CREB   |
| yellow | CC | GO:0000166  | nucleotide binding                            | 177   |      |      |     |        |          |          |                                                                                                 |

|        |    |            |                                             |       |      |      |     |        |         |          |                                                                                                                                             |
|--------|----|------------|---------------------------------------------|-------|------|------|-----|--------|---------|----------|---------------------------------------------------------------------------------------------------------------------------------------------|
| yellow | MF | GO:0018024 | histone-lysine N-methyltransferase activ... | 17735 | 40   | 1225 | 8   | 2.8    | 0.00581 | 2.857143 | ASH1L;MLL3;MLL5;RBBP5;SETD2;SETD7;SUV420H1;WHSC1L1                                                                                          |
| yellow | MF | GO:1901265 | nucleoside phosphate binding                | 17735 | 2386 | 1225 | 197 | 167.17 | 0.00588 | 1.178441 | ABC8B;ABC89;ABT1;ACADS;ACSL3;ACTR1B;ACTR3;AHCY;AHCYL1;AK1;AK4;APRT;ARFP2;ARFRP1;ARL16;ATA                                                   |
| yellow | BP | GO:0045839 | negative regulation of mitosis              | 17735 | 40   | 1225 | 8   | 2.81   | 0.00595 | 2.846975 | ANAPC11;ANAPC2;BUB1;BUB1B;CENPF;DYNC1L1;MAD1L1;TPR                                                                                          |
| yellow | BP | GO:0051784 | negative regulation of nuclear division     | 17735 | 40   | 1225 | 8   | 2.81   | 0.00595 | 2.846975 | ANAPC11;ANAPC2;BUB1;BUB1B;CENPF;DYNC1L1;MAD1L1;TPR                                                                                          |
| yellow | MF | GO:0042054 | histone methyltransferase activity          | 17735 | 49   | 1225 | 9   | 3.43   | 0.00634 | 2.623907 | ASH1L;MLL3;MLL5;PRMT7;RBBP5;SETD2;SETD7;SUV420H1;WHSC1L1                                                                                    |
| yellow | MF | GO:0008276 | protein methyltransferase activity          | 17735 | 67   | 1225 | 11  | 4.69   | 0.0065  | 2.345416 | ASH1L;LCMT1;MLL3;MLL5;PRMT7;RBBP5;SETD2;SETD7;SUV420H1;TRMT112;WHSC1L1                                                                      |
| yellow | BP | GO:0050854 | regulation of antigen receptor-mediated ... | 17735 | 25   | 1225 | 6   | 1.76   | 0.00664 | 3.409091 | DUSP3;ELF1;KCNN4;PHPT1;PTPRC;RC3H1                                                                                                          |
| yellow | BP | GO:0009148 | pyrimidine nucleoside triphosphate biosy... | 17735 | 18   | 1225 | 5   | 1.27   | 0.00675 | 3.937008 | DTYMK;NME3;NME4;UCK1;UCKL1                                                                                                                  |
| yellow | BP | GO:0070849 | response to epidermal growth factor stim... | 17735 | 18   | 1225 | 5   | 1.27   | 0.00675 | 3.937008 | BRAF;MAPK1;MCM7;MEDI1;TPR                                                                                                                   |
| yellow | BP | GO:0031577 | spindle checkpoint                          | 17735 | 41   | 1225 | 8   | 2.88   | 0.00695 | 2.777778 | ANAPC11;ANAPC2;BUB1;BUB1B;CENPF;DYNC1L1;MAD1L1;TPR                                                                                          |
| yellow | BP | GO:0006402 | mRNA catabolic process                      | 17735 | 179  | 1225 | 22  | 12.59  | 0.00742 | 1.747419 | ETF1;EXOSC5;LSM2;LSM4;PATL1;RC3H1;RPL13;RPL18;RPL18A;RPL28;RPL29;RPL38;RPL8;RPLP1;RPLP2;RPS1                                                |
| yellow | MF | GO:0005123 | death receptor binding                      | 17735 | 12   | 1225 | 4   | 0.84   | 0.00752 | 4.761905 | FEM1B;NGFRAP1;PIDD;TNFSF15                                                                                                                  |
| yellow | MF | GO:0019104 | DNA N-glycosylase activity                  | 17735 | 12   | 1225 | 4   | 0.84   | 0.00752 | 4.761905 | MPG;NEIL1;NTHL1;OGG1                                                                                                                        |
| yellow | BP | GO:0010257 | NADH dehydrogenase complex assembly         | 17735 | 12   | 1225 | 4   | 0.84   | 0.00763 | 4.761905 | BCS1L;NDUFS7;NDUFS8;TAZ                                                                                                                     |
| yellow | BP | GO:0032981 | mitochondrial respiratory chain complex ... | 17735 | 12   | 1225 | 4   | 0.84   | 0.00763 | 4.761905 | BCS1L;NDUFS7;NDUFS8;TAZ                                                                                                                     |
| yellow | BP | GO:0097031 | mitochondrial respiratory chain complex ... | 17735 | 12   | 1225 | 4   | 0.84   | 0.00763 | 4.761905 | BCS1L;NDUFS7;NDUFS8;TAZ                                                                                                                     |
| yellow | CC | GO:0022625 | cytosolic large ribosomal subunit           | 17735 | 52   | 1225 | 9   | 3.53   | 0.00772 | 2.549575 | RPL13;RPL18;RPL28;RPL29;RPL38;RPL8;RPLP1;RPLP2                                                                                              |
| yellow | BP | GO:0000956 | nuclear-transcribed mRNA catabolic proce... | 17735 | 169  | 1225 | 21  | 11.89  | 0.00776 | 1.766119 | ETF1;EXOSC5;LSM2;LSM4;PATL1;RC3H1;RPL13;RPL18;RPL18A;RPL28;RPL29;RPL38;RPL8;RPLP1;RPLP2;RPS1                                                |
| yellow | BP | GO:0019080 | viral genome expression                     | 17735 | 148  | 1225 | 19  | 10.41  | 0.00784 | 1.825168 | POLR2F;POLR2G;POLR2I;POLR2J;POLR2K;POLR2L;POLR2M;POLR2N;POLR2O;POLR2P;POLR2Q;POLR2R;POLR2S;POLR2T;POLR2U;POLR2V;POLR2W;POLR2X;POLR2Y;POLR2Z |
| yellow | BP | GO:0019083 | viral transcription                         | 17735 | 148  | 1225 | 19  | 10.41  | 0.00784 | 1.825168 | POLR2F;POLR2G;POLR2I;POLR2J;POLR2K;POLR2L;POLR2M;POLR2N;POLR2O;POLR2P;POLR2Q;POLR2R;POLR2S;POLR2T;POLR2U;POLR2V;POLR2W;POLR2X;POLR2Y;POLR2Z |
| yellow | BP | GO:0007093 | mitotic cell cycle checkpoint               | 17735 | 138  | 1225 | 18  | 9.71   | 0.00808 | 1.853759 | ANAPC11;ANAPC2;BUB1;BUB1B;CENPF;CLSPN;DYNC1L1;HRAS;MAD1L1;PIDD;PSMA7;PSMB4;PSMB5;PSMB                                                       |
| yellow | CC | GO:0005819 | spindle                                     | 17735 | 232  | 1225 | 26  | 15.75  | 0.00812 | 1.650794 | BUB1B;CDC6;CDC8;CENPF;CLASP1;DLGAP5;DYNC1L1;E4F1;HAUS5;KAT2A;KIF15;KIF20A;LATS1;LATS2;MAC                                                   |
| yellow | BP | GO:0002702 | positive regulation of production of mol... | 17735 | 26   | 1225 | 6   | 1.83   | 0.00813 | 3.278689 | CD36;CLCF1;GIMAP5;HPX;TRAF2;TRAF6                                                                                                           |
| yellow | BP | GO:0044281 | small molecule metabolic process            | 17735 | 2545 | 1225 | 208 | 179.05 | 0.00838 | 1.161687 | ACADS;ACAP3;ACER3;ACOT8;ACPS5;ACSL3;ADHFE1;ADORA2A;AFMID;AHCY;AHCYL1;AK1;AK4;AKR1A1;ALS2;A                                                  |
| yellow | MF | GO:0000062 | fatty-acyl-CoA binding                      | 17735 | 19   | 1225 | 5   | 1.33   | 0.0085  | 3.759398 | ACADS;ACBD4;GCDH;SOAT1;SOAT2                                                                                                                |
| yellow | BP | GO:0000910 | cytokinesis                                 | 17735 | 108  | 1225 | 15  | 7.6    | 0.00851 | 1.973684 | ACTR3;CDG6;CEP55;DIAPH2;KIF20A;MYH10;NUSAP1;PIK3C3;PIN1;RABEP2;RHOC;ROCK2;SPG20;STAMBP;US                                                   |
| yellow | BP | GO:0006414 | translational elongation                    | 17735 | 108  | 1225 | 15  | 7.6    | 0.00851 | 1.973684 | EEF1D;EEF1G;RPL13;RPL18;RPL18A;RPL28;RPL29;RPL38;RPL8;RPLP1;RPLP2;RPS15;RPS2;RPS28;TUFM                                                     |
| yellow | BP | GO:0043549 | regulation of kinase activity               | 17735 | 638  | 1225 | 61  | 44.89  | 0.00863 | 1.358877 | ADAM9;ADORA2A;ALS2;ANAPC2;APOE;ATF4;AVP1;BRAF;C19orf10;CCNL2;CDC25A;CDC6;CDK12;CLSPN;DOI                                                    |
| yellow | BP | GO:0005856 | regulation of T cell receptor signaling ... | 17735 | 19   | 1225 | 5   | 1.34   | 0.00864 | 3.731343 | DUSP3;ELF1;KCNN4;PHPT1;RC3H1                                                                                                                |
| yellow | BP | GO:0008654 | phospholipid biosynthetic process           | 17735 | 215  | 1225 | 25  | 15.13  | 0.00907 | 1.652346 | ACSL3;ALG12;CDS2;DOLK;DPM3;ETNK2;ISYNA1;MTM1;MTMR1;MVK;PCYT2;PEMT;PIGG;PIK3C3;PIK3CB;PIK                                                    |
| yellow | BP | GO:0002415 | viral reproductive process                  | 17735 | 542  | 1225 | 53  | 38.13  | 0.00909 | 1.389982 | ACOT8;ADAM17;AP1G2;ATF7IP;BUB1;C1QBP;CDK13;CPSE4;CREB3;DYNC1L1;E4F1;EIF4G3;GADD45GIP1;GN                                                    |
| yellow | BP | GO:0016032 | viral reproduction                          | 17735 | 689  | 1225 | 65  | 48.47  | 0.00912 | 1.341036 | ACOT8;ANKRD17;AP1G1;AP1G2;AP1S1;ATF7IP;BUB1;C1QBP;CD88;CDK13;CPSE4;CREB3;DYNC1L1;E4F1;EIF                                                   |
| yellow | CC | GO:0005849 | mRNA cleavage factor complex                | 17735 | 13   | 1225 | 4   | 0.88   | 0.00919 | 4.545455 | CPSE2;CPSE4;PIP5K1A;TUT1                                                                                                                    |
| yellow | MF | GO:0016779 | nucleotidyltransferase activity             | 17735 | 120  | 1225 | 16  | 8.41   | 0.00952 | 1.902497 | CDS2;CHRA1;FICD;FLAD1;PAPSS1;PCYT2;POLD1;POLD4;POLM1;POLR2F;POLR2G;POLR2I;POLR2L;POLR3K;PC                                                  |
| yellow | BP | GO:0044764 | multi-organism cellular process             | 17735 | 691  | 1225 | 65  | 48.61  | 0.00969 | 1.337173 | ACOT8;ANKRD17;AP1G1;AP1G2;AP1S1;ATF7IP;BUB1;C1QBP;CD88;CDK13;CPSE4;CREB3;DYNC1L1;E4F1;EIF                                                   |
| yellow | MF | GO:0016407 | acetyltransferase activity                  | 17735 | 90   | 1225 | 13  | 6.31   | 0.00971 | 2.060222 | ELP4;EPC1;KAT2A;MCRS1;NAA10;NAGS;NAT14;NAT6;NAT9;NCOA3;PHF20;SAT2;TADA3                                                                     |
| yellow | BP | GO:0033205 | cell cycle cytokinesis                      | 17735 | 35   | 1225 | 7   | 2.46   | 0.00987 | 2.845528 | ACTR3;CDG6;MYH10;NUSAP1;RHOC;STAMBP;USP8                                                                                                    |
| yellow | BP | GO:0006401 | RNA catabolic process                       | 17735 | 206  | 1225 | 24  | 14.49  | 0.01019 | 1.656315 | ETF1;EXOSC5;LSM2;LSM4;PATL1;POLD1;RC3H1;RNASEH2C;RPL13;RPL18;RPL18A;RPL28;RPL29;RPL38;RPL8;I                                                |
| yellow | BP | GO:0033036 | macromolecule localization                  | 17735 | 1852 | 1225 | 155 | 130.29 | 0.01041 | 1.189654 | ABC8B;ACSL3;ADAM9;ADORA2A;AFTPH;AHCYL1;AIP;AKAP10;ALS2;AP1G1;AP1G2;AP1S1;APOE;APOM;ARFG                                                     |
| yellow | MF | GO:0016860 | intramolecular oxidoreductase activity      | 17735 | 44   | 1225 | 8   | 3.08   | 0.01046 | 2.597403 | DDT;ECL1;EHHADH;ERP29;ERP44;MR11;PTGES2;SPATA20                                                                                             |
| yellow | MF | GO:0016491 | oxidoreductase activity                     | 17735 | 709  | 1225 | 66  | 49.67  | 0.01058 | 1.32877  | ACADS;ADHFE1;AKR1A1;ALKBH7;CBR1;CCS;COQ7;COX4I1;CRYL1;CYP1B1;CYP2E1;DCXR;DECR2;DHDH;DHRS                                                    |
| yellow | BP | GO:0006399 | tRNA metabolic process                      | 17735 | 121  | 1225 | 16  | 8.51   | 0.01066 | 1.880141 | CTU2;DALRD3;FBL;GTPBP3;PARS2;POP7;PUS1;PUSL1;QARS;QTRT1;SARS2;TPR;TRMU;TRPT1;TRUB2;VAR52                                                    |
| yellow | MF | GO:0016799 | hydrolase activity, hydrolyzing N-glycos... | 17735 | 20   | 1225 | 5   | 1.4    | 0.01069 | 3.571429 | CD38;MPG;NEIL1;NTHL1;OGG1                                                                                                                   |
| yellow | BP | GO:0045859 | regulation of protein kinase activity       | 17735 | 608  | 1225 | 58  | 42.77  | 0.01073 | 1.356091 | ADAM9;ADORA2A;ALS2;ANAPC2;APOE;ATF4;AVP1;BRAF;C19orf10;CCNL2;CDC25A;CDC6;CDK12;CLSPN;DOI                                                    |
| yellow | BP | GO:0015985 | energy coupled proton transport, down el... | 17735 | 20   | 1225 | 5   | 1.41   | 0.01087 | 3.546099 | ATP5D;ATP5G2;ATP5G3;ATP5H;STOML2                                                                                                            |
| yellow | BP | GO:0015986 | ATP synthesis coupled proton transport      | 17735 | 20   | 1225 | 5   | 1.41   | 0.01087 | 3.546099 | ATP5D;ATP5G2;ATP5G3;ATP5H;STOML2                                                                                                            |
| yellow | BP | GO:0006415 | translational termination                   | 17735 | 91   | 1225 | 13  | 6.4    | 0.01097 | 2.03125  | ETF1;RPL13;RPL18;RPL18A;RPL28;RPL29;RPL38;RPL8;RPLP1;RPLP2;RPS15;RPS2;RPS28                                                                 |
| yellow | BP | GO:0007088 | regulation of mitosis                       | 17735 | 91   | 1225 | 13  | 6.4    | 0.01097 | 2.03125  | ANAPC11;ANAPC2;BUB1;BUB1B;CDC6;CDK13;CENPF;DLGAP5;DYNC1L1;MAD1L1;NUSAP1;PIN1;TPR                                                            |
| yellow | BP | GO:0051783 | regulation of nuclear division              | 17735 | 91   | 1225 | 13  | 6.4    | 0.01097 | 2.03125  | ANAPC11;ANAPC2;BUB1;BUB1B;CDC6;CDK13;CENPF;DLGAP5;DYNC1L1;MAD1L1;NUSAP1;PIN1;TPR                                                            |
| yellow | BP | GO:0071900 | regulation of protein serine/threonine k... | 17735 | 368  | 1225 | 38  | 25.89  | 0.01111 | 1.467748 | ALS2;ANAPC2;APOE;AVP1;CCNL2;CDC25A;CDC6;CDK12;DUSP10;DUSP2;DUSP3;HIPK3;HRAS;LATS1;LATS2;LI                                                  |
| yellow | MF | GO:0032813 | tumor necrosis factor receptor superfam...  | 17735 | 36   | 1225 | 7   | 2.52   | 0.01129 | 2.777778 | FEM1B;NGFRAP1;PIDD;SIVA1;TNFSF12;TNFSF15;TRAF2                                                                                              |
| yellow | BP | GO:0009142 | nucleoside triphosphate biosynthetic pro... | 17735 | 72   | 1225 | 11  | 5.07   | 0.01145 | 2.169625 | ATP5D;ATP5G2;ATP5G3;ATP5H;DTYMK;NME3;NME4;STAF2;SURF1;UCK1;UCKL1                                                                            |
| yellow | BP | GO:0043506 | regulation of JUN kinase activity           | 17735 | 72   | 1225 | 11  | 5.07   | 0.01145 | 2.169625 | DUSP10;HIPK3;MAGI3;MAP3K10;MAP4K2;TAOK3;TPP3;TRAF2;TRAF6;WNT7A;ZEB2                                                                         |
| yellow | BP | GO:0043405 | regulation of MAP kinase activity           | 17735 | 253  | 1225 | 28  | 17.8   | 0.01147 | 1.573034 | APOE;AVP1;CDK12;DUSP10;DUSP2;DUSP3;HIPK3;HRAS;ITSN2;LPAR1;MAGI3;MAP3K10;MAP4K2;MAPK1;M                                                      |
| yellow | MF | GO:0016410 | N-acyltransferase activity                  | 17735 | 92   | 1225 | 13  | 6.45   | 0.01161 | 2.015504 | ELP4;EPC1;KAT2A;MCRS1;NAA10;NAGS;NAT14;NAT6;NAT9;NCOA3;PHF20;SAT2;TADA3                                                                     |
| yellow | MF | GO:0016278 | lysine N-methyltransferase activity         | 17735 | 45   | 1225 | 8   | 3.15   | 0.01196 | 2.539683 | ASH1L;MLL3;MLL5;RBBP5;SETD2;SETD7;SUV420H1;WHSC1L1                                                                                          |
| yellow | MF | GO:0016279 | protein-lysine N-methyltransferase activ... | 17735 | 45   | 1225 | 8   | 3.15   | 0.01196 | 2.539683 | ASH1L;MLL3;MLL5;RBBP5;SETD2;SETD7;SUV420H1;WHSC1L1                                                                                          |
| yellow | CC | GO:0000780 | condensed nuclear chromosome, centromeri... | 17735 | 14   | 1225 | 4   | 0.95   | 0.01219 | 4.210526 | BUB1;BUB1B;REC8;SUV420H1                                                                                                                    |
| yellow | CC | GO:0005665 | DNA-directed RNA polymerase II, core com... | 17735 | 14   | 1225 | 4   | 0.95   | 0.01219 | 4.210526 | POLR2F;POLR2G;POLR2I;POLR2L                                                                                                                 |
| yellow | BP | GO:0071156 | regulation of cell cycle arrest             | 17735 | 266  | 1225 | 29  | 18.71  | 0.01241 | 1.549973 | ANAPC11;ANAPC2;ATRIP;BABAM1;BUB1;BUB1B;CDC25A;CDC6;CENPF;CLSPN;DYNC1L1;E2F1;FANCG;FEM1                                                      |
| yellow | BP | GO:0035023 | regulation of Rho protein signal transdu... | 17735 | 166  | 1225 | 20  | 11.68  | 0.01275 | 1.712329 | ALS2;APOE;ARFGF1;ARHGAP4;ARHGEF25;ARHGEF26;FGO6;FICD;HRAS;ITSN2;LPAR1;MLST8;PIN1;PIP5K1A;                                                   |
| yellow | MF | GO:0042826 | histone deacetylase binding                 | 17735 | 64   | 1225 | 10  | 4.48   | 0.013   | 2.232143 | BHLHE41;HDAC10;KAT2A;NIPBL;PRDM1;RAD9A;SP1;SU5D3;TOP2A;TRAF6                                                                                |
| yellow | MF | GO:0005515 | protein binding                             | 17735 | 7306 | 1225 | 547 | 511.88 | 0.01365 | 1.06861  | ABC89;ABT1;ACAP3;ACCS;ACOT8;ACSL3;ACTR1B;ACTR3;ADAM12;ADAM9;ADAMTS13;ADAMTS12;ADNP;AD                                                       |
| yellow | BP | GO:0006241 | CTP biosynthetic process                    | 17735 | 14   | 1225 | 4   | 0.98   | 0.01379 | 4.081633 | NME3;NME4;UCK1;UCKL1                                                                                                                        |
| yellow | BP | GO:0046036 | CTP metabolic process                       | 17735 | 14   | 1225 | 4   | 0.98   | 0.01379 | 4.081633 | NME3;NME4;UCK1;UCKL1                                                                                                                        |
| yellow | BP | GO:0002705 | positive regulation of leukocyte mediate... | 17735 | 46   | 1225 | 8   | 3.24   | 0.01393 | 2.469136 | ABC89;GIMAP5;HPX;NCR3;P2RX7;TRAF2;TRAF6;ZP3                                                                                                 |
| yellow | BP | GO:0002708 | positive regulation of lymphocyte mediat... | 17735 | 46   | 1225 | 8   | 3.24   | 0.01393 | 2.469136 | ABC89;GIMAP5;HPX;NCR3;P2RX7;TRAF2;TRAF6;ZP3                                                                                                 |
| yellow | BP | GO:0034968 | histone lysine methylation                  | 17735 | 46   | 1225 | 8   | 3.24   | 0.01393 | 2.469136 | KDM3A;KDM6A;MLL3;MLL5;RBBP5;SETD2;SUV420H1;WHSC1L1                                                                                          |
| yellow | BP | GO:0034613 | cellular protein localization               | 17735 | 956  | 1225 | 85  | 67.26  | 0.01402 | 1.263753 | ACSL3;AHCYL1;AIP;AP1G1;AP1G2;AP1S1;ARFRP1;ARNT1;ASPSCR1;BUB1B;CCDC101;CHCH1;CD36;CIB1;CLA                                                   |

|        |    |            |                                             |       |      |      |     |        |         |          |                                                                                            |
|--------|----|------------|---------------------------------------------|-------|------|------|-----|--------|---------|----------|--------------------------------------------------------------------------------------------|
| yellow | BP | GO:0002831 | regulation of response to biotic stimulu... | 17735 | 84   | 1225 | 12  | 5.91   | 0.0142  | 2.030457 | AP1G1;AP1S1;C1QB;CD8B;CREB3;MICB;NFKB1L1;PRDM1;SIGIRR;TNFAIP3;TRAF6;ZC3HAV1                |
| yellow | BP | GO:0042325 | regulation of phosphorylation               | 17735 | 869  | 1225 | 78  | 61.14  | 0.01474 | 1.275761 | ADAM9;ADORA2A;ALS2;ANAPC2;APOE;ATF4;AVP11;BRAF;C19orf10;CCNL2;CD36;CDC25A;CDC6;CDK12;CLCF  |
| yellow | MF | GO:0016776 | phosphotransferase activity, phosphate g... | 17735 | 38   | 1225 | 7   | 2.66   | 0.01512 | 2.631579 | AK1;AK4;DTYMK;MAGI3;NME3;NME4;PMVK                                                         |
| yellow | BP | GO:0006614 | SRP-dependent cotranslational protein ta... | 17735 | 105  | 1225 | 14  | 7.39   | 0.01518 | 1.894452 | RPL13;RPL18;RPL18A;RPL28;RPL29;RPL38;RPL8;RPL8L1;RPL2;RPS15;RPS2;RPS28;SSR1;SSR4           |
| yellow | BP | GO:0070727 | cellular macromolecule localization         | 17735 | 960  | 1225 | 85  | 67.54  | 0.01545 | 1.258513 | ACSL3;AHCYL1;AIP;AP1G1;AP1G2;AP1S1;ARFRP1;ARNTL;ASPSCR1;BUB1B;CCDC101;CCHCR1;CD36;CIB1;CLA |
| yellow | BP | GO:0006888 | ER to Golgi vesicle-mediated transport      | 17735 | 56   | 1225 | 9   | 3.94   | 0.01548 | 2.284264 | KLHL12;LMF1;PREB;SEC22B;SEC24B;TRAPPAC2;TRAPPA4;USE1;YIPF5                                 |
| yellow | BP | GO:0034655 | nucleobase-containing compound catabolic... | 17735 | 770  | 1225 | 70  | 54.17  | 0.01556 | 1.292228 | ACAP3;ALS2;ARFGF1;ARFRP1;ARHGAP4;ATL3;ATP5D;ATP5H;DNASE1L2;ERCC1;ETF1;EXOSC5;FGD6;FICD;GN  |
| yellow | CC | GO:0000315 | organellar large ribosomal subunit          | 17735 | 15   | 1225 | 4   | 1.02   | 0.01575 | 3.921569 | MRPL12;MRPL23;MRPL52;MRPL55                                                                |
| yellow | CC | GO:0005762 | mitochondrial large ribosomal subunit       | 17735 | 15   | 1225 | 4   | 1.02   | 0.01575 | 3.921569 | MRPL12;MRPL23;MRPL52;MRPL55                                                                |
| yellow | CC | GO:0005852 | eukaryotic translation initiation factor... | 17735 | 15   | 1225 | 4   | 1.02   | 0.01575 | 3.921569 | EIF3F;EIF3G;EIF3J;EIF3K                                                                    |
| yellow | BP | GO:0033365 | protein localization to organelle           | 17735 | 510  | 1225 | 49  | 35.88  | 0.01597 | 1.365663 | AIP;ARFRP1;ARNTL;BUB1B;CCDC101;CD36;CREB3;DVLL1;FBXW11;GET4;GFER;HOOK3;LIME1;MAPK1;MED1;N  |
| yellow | MF | GO:0019201 | nucleotide kinase activity                  | 17735 | 22   | 1225 | 5   | 1.54   | 0.01617 | 3.246753 | AK1;AK4;DTYMK;MAGI3;PNKP                                                                   |
| yellow | BP | GO:0051301 | cell division                               | 17735 | 474  | 1225 | 46  | 33.35  | 0.01628 | 1.37931  | ACTR3;ANAPC11;ANAPC2;BUB1;BUB1B;CDC25A;CDC6;CDCA8;CENPF;CENPT;CEP55;CLASP1;DIAPH2;DYNC1L   |
| yellow | BP | GO:0009147 | pyrimidine nucleoside triphosphate metab... | 17735 | 22   | 1225 | 5   | 1.55   | 0.01643 | 3.225806 | DTYMK;NME3;NME4;UCK1;UCKL1                                                                 |
| yellow | BP | GO:0044260 | cellular macromolecule metabolic process    | 17735 | 6621 | 1225 | 499 | 465.81 | 0.01673 | 1.071252 | ABT1;ADAM9;ADAMTS13;ADNP;ADORA2A;AES;AFF1;AHCYL1;AIP;ALG12;ALS2;ANAPC11;ANAPC2;APOE;ARF    |
| yellow | BP | GO:0006289 | nucleotide-excision repair                  | 17735 | 776  | 1225 | 11  | 5.35   | 0.01683 | 2.056075 | ERCC1;NEILL1;OGG1;PNKP;POLD1;POLD4;POLR2F;POLR2G;POLR2I;POLR2L                             |
| yellow | BP | GO:0015980 | energy derivation by oxidation of organi... | 17735 | 331  | 1225 | 34  | 23.29  | 0.01684 | 1.459854 | ATP5D;ATP5H;COQ7;COX4I1;CYC1;ETFB;GNG8;GYG1;NDUFA11;NDUFA13;NDUFA3;NDUFA8;NDUFB10;NDU      |
| yellow | CC | GO:0043025 | neuronal cell body                          | 17735 | 259  | 1225 | 27  | 17.58  | 0.01738 | 1.535836 | ADORA2A;ALS2;APOE;CANX;CREB3;DVLL1;EEF1A2;GNB2L1;GRIN3A;KLHL17;MAPK1;MYH10;SUFW57;NRP1;P   |
| yellow | BP | GO:0043414 | macromolecule methylation                   | 17735 | 128  | 1225 | 16  | 9.01   | 0.01763 | 1.775805 | ATF7IP;ETF1;KDM3A;KDM6A;LCMT1;MGMT;MLL3;MLLS;PICK1;PRMT7;RBBP5;SETD2;SETD7;SU420H1;TRV     |
| yellow | BP | GO:0006613 | cotranslational protein targeting to mem... | 17735 | 107  | 1225 | 14  | 7.53   | 0.01768 | 1.85923  | RPL13;RPL18;RPL18A;RPL28;RPL29;RPL38;RPL8;RPL8L1;RPL2;RPS15;RPS2;RPS28;SSR1;SSR4           |
| yellow | BP | GO:0045047 | protein targeting to ER                     | 17735 | 107  | 1225 | 14  | 7.53   | 0.01768 | 1.85923  | RPL13;RPL18;RPL18A;RPL28;RPL29;RPL38;RPL8;RPL8L1;RPL2;RPS15;RPS2;RPS28;SSR1;SSR4           |
| yellow | BP | GO:0006284 | base-excision repair                        | 17735 | 39   | 1225 | 7   | 2.74   | 0.0177  | 2.554745 | MPG;MUTYH;NEIL1;NTL1;OGG1;POLD1;POLD4                                                      |
| yellow | BP | GO:0009209 | pyrimidine ribonucleoside triphosphate b... | 17735 | 15   | 1225 | 4   | 1.06   | 0.01777 | 3.773585 | NME3;NME4;UCK1;UCKL1                                                                       |
| yellow | BP | GO:0032259 | methylation                                 | 17735 | 139  | 1225 | 17  | 9.78   | 0.01797 | 1.738241 | AHCY;ATF7IP;ETF1;KDM3A;KDM6A;LCMT1;MGMT;MLL3;MLLS;PICK1;PRMT7;RBBP5;SETD2;SETD7;SU420H1    |
| yellow | BP | GO:0000184 | nuclear-transcribed mRNA catabolic proce... | 17735 | 118  | 1225 | 15  | 8.3    | 0.01837 | 1.807229 | ETF1;RPL13;RPL18;RPL18A;RPL28;RPL29;RPL38;RPL8;RPL8L1;RPL2;RPS15;RPS2;RPS28;UPF2;WBC       |
| yellow | MF | GO:0005088 | Ras guanyl-nucleotide exchange factor ac... | 17735 | 108  | 1225 | 14  | 7.57   | 0.01846 | 1.849406 | ALS2;ARHGFE25;ARHGFE26;DENND2C;FGD6;ITSN2;PLEKHG2;RABGEF1;RABGEF2;SERC5;SPATA              |
| yellow | BP | GO:0016044 | cellular membrane organization              | 17735 | 417  | 1225 | 41  | 29.34  | 0.01846 | 1.39741  | ANO6;AP1G1;AP1S1;ARFGF1;BAIAP2L2;CD36;CHMP4A;CHMP6;CIB1;CRB3;DOK7;DVLL1;GET4;GIMAP5;GNA    |
| yellow | BP | GO:0016567 | protein ubiquitination                      | 17735 | 540  | 1225 | 51  | 37.99  | 0.01902 | 1.342459 | ANAPC11;ANAPC2;ARIH1;ASB3;ASB6;BUB1B;DTX3;E4F1;FBX15;FBX16;FBXO2;FBXO24;FBXW11;FBXW5;FEN   |
| yellow | BP | GO:0072599 | establishment of protein localization to... | 17735 | 108  | 1225 | 14  | 7.6    | 0.01905 | 1.842105 | RPL13;RPL18;RPL18A;RPL28;RPL29;RPL38;RPL8;RPL8L1;RPL2;RPS15;RPS2;RPS28;SSR1;SSR4           |
| yellow | CC | GO:0015935 | small ribosomal subunit                     | 17735 | 60   | 1225 | 9   | 4.07   | 0.01915 | 2.211302 | GNB2L1;MRPS11;MRPS12;MRPS15;MRPS18A;MRPS28;RPS15;RPS2;RPS28                                |
| yellow | BP | GO:0044710 | single-organism metabolic process           | 17735 | 3059 | 1225 | 242 | 215.21 | 0.01919 | 1.124483 | ACADS;ACAP3;ACER3;ACOT8;ACPS;ACSL3;ADHE1;ADORA2A;AFMID;AHCY;AHCYL1;AK1;AK4;AKR1A1;ALG12    |
| yellow | CC | GO:0000794 | condensed nuclear chromosome                | 17735 | 70   | 1225 | 10  | 4.75   | 0.01922 | 2.105263 | BUB1;BUB1B;RAD21;RAD9A;REC8;SU420H1;SYCE1;TOP2A;TOPBP1;TTN                                 |
| yellow | BP | GO:0070647 | protein modification by small protein co... | 17735 | 640  | 1225 | 59  | 45.03  | 0.0194  | 1.310238 | ANAPC11;ANAPC2;ARIH1;ASB3;ASB6;BABAM1;BUB1B;DTX3;E4F1;FBX15;FBX16;FBXO2;FBXW11;FE          |
| yellow | MF | GO:0043425 | bHLH transcription factor binding           | 17735 | 23   | 1225 | 5   | 1.61   | 0.0195  | 3.10559  | ARNTL;BHLHE41;MAP3K10;PSMD9;SP1                                                            |
| yellow | MF | GO:0003743 | translation initiation factor activity      | 17735 | 49   | 1225 | 8   | 3.43   | 0.01957 | 2.332362 | E1F1;E1F2B2;E1F2B4;E1F3F;E1F3G;E1F3J;E1F3K;E1F4G                                           |
| yellow | BP | GO:0006468 | regulation of Ras protein signal transdu... | 17735 | 276  | 1225 | 29  | 19.42  | 0.01968 | 1.493306 | ACAP3;ALS2;APOE;ARFGF1;ARHGAP4;ARHGFE25;ARHGFE26;FGD6;FICD;HRAS;ITSN2;LPAR1;MLST8;NF1;PI   |
| yellow | CC | GO:0022626 | cytosolic ribosome                          | 17735 | 91   | 1225 | 12  | 6.18   | 0.01983 | 1.941748 | RPL13;RPL18;RPL18A;RPL28;RPL29;RPL38;RPL8;RPL8L1;RPL2;RPS15;RPS2;RPS28                     |
| yellow | CC | GO:0005865 | striated muscle thin filament               | 17735 | 16   | 1225 | 4   | 1.09   | 0.01989 | 3.669725 | TMOD3;TNNT3;TPM2;TTN                                                                       |
| yellow | BP | GO:0009201 | ribonucleoside triphosphate biosynthetic... | 17735 | 68   | 1225 | 10  | 4.78   | 0.01993 | 2.09205  | ATP5D;ATP5G2;ATP5G3;ATP5H;NME3;NME4;STOML2;SURF1;UCK1;UCKL1                                |
| yellow | BP | GO:0051641 | cellular localization                       | 17735 | 2049 | 1225 | 167 | 144.15 | 0.02003 | 1.158515 | ACSL3;ACTR3;ADAM9;ADORA2A;AHCYL1;AIP;ALS2;ANKRD54;AP1G1;AP1G2;AP1S1;APOE;ARFGF1;ARFRP1     |
| yellow | BP | GO:0006468 | protein phosphorylation                     | 17735 | 1126 | 1225 | 97  | 79.22  | 0.0201  | 1.224438 | ADAM9;ADORA2A;ALS2;ANAPC2;APOE;ATF4;AVP11;BRAF;C19orf10;CCNL2;CD36;CDC25A;CDC6;CDK12;CDK   |
| yellow | CC | GO:0005789 | endoplasmic reticulum membrane              | 17735 | 757  | 1225 | 66  | 51.38  | 0.02112 | 1.284547 | ABC89;ACER3;ACSL3;ALG12;ATL3;AUP1;CANX;CREB3;CREB3L4;CYP1B1;CYP2E1;DERL3;DOLK;DPM3;ERGIC3  |
| yellow | BP | GO:0061024 | membrane organization                       | 17735 | 421  | 1225 | 41  | 29.62  | 0.02126 | 1.3842   | ANO6;AP1G1;AP1S1;ARFGF1;BAIAP2L2;CD36;CHMP4A;CHMP6;CIB1;CRB3;DOK7;DVLL1;GET4;GIMAP5;GNA    |
| yellow | BP | GO:0009451 | RNA modification                            | 17735 | 59   | 1225 | 9   | 4.15   | 0.02131 | 2.168675 | CTU2;TPBPS3;NHP2;PUS1;PUSL1;QTRT1;RPU5D1;RPU5D3;TRUB2                                      |
| yellow | BP | GO:0016482 | cytoplasmic transport                       | 17735 | 719  | 1225 | 65  | 50.58  | 0.02144 | 1.285093 | ACSL3;AHCYL1;AIP;ARFRP1;ARNTL;CCHCR1;CD36;CPSF2;CREB3;DDX39A;FBXW11;GFER;GIMAP5;HOOK3;KL   |
| yellow | CC | GO:0016604 | nuclear body                                | 17735 | 276  | 1225 | 28  | 18.73  | 0.02166 | 1.494928 | ARNTL;CCHCR1;CDK12;CDK13;CREB3;EAF1;FBL;GEMIN7;HINFP;HIPK1;HIPK3;MAML2;MLLS;NHP2;NSRP1;OGG |
| yellow | BP | GO:0031399 | regulation of protein modification proce... | 17735 | 1026 | 1225 | 89  | 72.18  | 0.02167 | 1.233029 | ADAM9;ADORA2A;ALS2;ANAPC11;ANAPC2;APOE;ARFGF1;ATF4;AVP11;BRAF;BUB1B;C19orf10;CCNL2;CD36    |
| yellow | MF | GO:0005524 | ATP binding                                 | 17735 | 1462 | 1225 | 122 | 102.43 | 0.02175 | 1.191057 | ABC88;ABC89;ACSL3;ACTR1B;ACTR3;AK1;AK4;ATAD3B;ATP5D;BCS1L;BMP2K;BRAF;BUB1;BUB1B;CDC6;CDK   |
| yellow | BP | GO:0042455 | ribonucleoside biosynthetic process         | 17735 | 110  | 1225 | 14  | 7.74   | 0.02202 | 1.808786 | APRT;ATP5D;ATP5G2;ATP5G3;ATP5H;NME3;NME4;PANK4;PAPS51;QTRT1;STOML2;SURF1;UCK1;UCKL1        |
| yellow | BP | GO:0016071 | mRNA metabolic process                      | 17735 | 607  | 1225 | 56  | 42.7   | 0.02204 | 1.311475 | AHCYL1;C1QBP;CDK12;CDK13;CEL2F;CEL2G;CPSF2;CPSF4;DDX39A;ETF1;EXOSC5;GEMIN7;HNRNPH3;LSM2;L  |
| yellow | BP | GO:0009208 | pyrimidine ribonucleoside triphosphate m... | 17735 | 16   | 1225 | 4   | 1.13   | 0.02241 | 3.539823 | NME3;NME4;UCK1;UCKL1                                                                       |
| yellow | BP | GO:0031146 | SCF-dependent proteasomal ubiquitin-depe... | 17735 | 16   | 1225 | 4   | 1.13   | 0.02241 | 3.539823 | FBX15;FBXO2;FBXW11;FBXW5                                                                   |
| yellow | BP | GO:0070972 | protein localization to endoplasmic reti... | 17735 | 121  | 1225 | 15  | 8.51   | 0.02259 | 1.762632 | PEX16;RPL13;RPL18;RPL18A;RPL28;RPL29;RPL38;RPL8;RPL8L1;RPL2;RPS15;RPS2;RPS28;SSR1;SSR4     |
| yellow | CC | GO:0043228 | non-membrane-bounded organelle              | 17735 | 3122 | 1225 | 238 | 211.89 | 0.02275 | 1.123224 | ABC88;ABT1;ACTR1B;ACTR3;ADORA2A;ALS2;ANKRD23;APBB3;ARC;ARFGF1;ARHGFE25;ASH1L;ATF4;BTBD6    |
| yellow | CC | GO:0043232 | intracellular non-membrane-bounded organ... | 17735 | 3122 | 1225 | 238 | 211.89 | 0.02275 | 1.123224 | ABC88;ABT1;ACTR1B;ACTR3;ADORA2A;ALS2;ANKRD23;APBB3;ARC;ARFGF1;ARHGFE25;ASH1L;ATF4;BTBD6    |
| yellow | MF | GO:0032559 | adenyl ribonucleotide binding               | 17735 | 1491 | 1225 | 124 | 104.46 | 0.0228  | 1.187057 | ABC88;ABC89;ACSL3;ACTR1B;ACTR3;AK1;AK4;APRT;ATAD3B;ATP5D;BCS1L;BMP2K;BRAF;BUB1;BUB1B;CDC   |
| yellow | BP | GO:0016571 | histone methylation                         | 17735 | 60   | 1225 | 9   | 4.22   | 0.02356 | 2.132701 | KDM3A;KDM6A;MLL3;MLLS;PRMT7;RBBP5;SETD2;SU420H1;WHSC1L1                                    |
| yellow | BP | GO:0048709 | oligodendrocyte differentiation             | 17735 | 60   | 1225 | 9   | 4.22   | 0.02356 | 2.132701 | APOE;BOK;EIF2B2;EIF2B4;HDAC10;HDAC11;NF1;SOX8;TP73                                         |
| yellow | BP | GO:0030520 | regulation of Rac protein signal transdu... | 17735 | 24   | 1225 | 5   | 1.69   | 0.02361 | 2.95858  | ALS2;HRAS;MLST8;NF1;TMN3                                                                   |
| yellow | BP | GO:0043170 | macromolecule metabolic process             | 17735 | 7334 | 1225 | 547 | 515.97 | 0.0238  | 1.060139 | ABT1;ADAM12;ADAM9;ADAMDECI1;ADAMTS13;ADNP;ADORA2A;AES;AFF1;AHCYL1;AIP;ALG12;ALS2;ANAPC     |
| yellow | BP | GO:0044265 | cellular macromolecule catabolic process    | 17735 | 698  | 1225 | 63  | 49.11  | 0.02399 | 1.282834 | ANAPC11;ANAPC2;APOE;ARIH1;BUB1B;DERL3;DNASE1L2;DVLL1;ERCC1;ERLIN2;ETF1;EXOSC5;FBX15;FBXO2  |
| yellow | BP | GO:0046328 | regulation of JNK cascade                   | 17735 | 133  | 1225 | 16  | 9.36   | 0.02444 | 1.709402 | DUSP10;DUSP3;HIPK3;HRAS;MAGI3;MAP3K10;MAP4K2;SERPINF2;SH3RF1;TAOK3;TP73;TRAF2;TRAF4;TRAF   |
| yellow | BP | GO:0001932 | regulation of protein phosphorylation       | 17735 | 813  | 1225 | 72  | 57.2   | 0.02444 | 1.258741 | ADAM9;ADORA2A;ALS2;ANAPC2;APOE;ATF4;AVP11;BRAF;C19orf10;CCNL2;CD36;CDC25A;CDC6;CDK12;CLCF  |
| yellow | MF | GO:0030554 | adenyl nucleotide binding                   | 17735 | 1495 | 1225 | 124 | 104.74 | 0.02452 | 1.183884 | ABC88;ABC89;ACSL3;ACTR1B;ACTR3;AK1;AK4;APRT;ATAD3B;ATP5D;BCS1L;BMP2K;BRAF;BUB1;BUB1B;CDC   |
| yellow | CC | GO:0000922 | spindle pole                                | 17735 | 94   | 1225 | 12  | 6.38   | 0.02497 | 1.880878 | CDCE6;CDCA8;CENPF;DLGAP5;DYNC1L1;HAUS8;LATS1;LATS2;ROCK2;THAP11;TOPBP1;TUBGCP3             |
| yellow | CC | GO:0044450 | microtubule organizing center part          | 17735 | 94   | 1225 | 12  | 6.38   | 0.02497 | 1.880878 | CDCA8;CENPF;CLASP1;CNTLN;HYOK3;KIF24;KRT18;MZZT8;PARC3;THAP11;TOPBP2;TUBGCP3               |
| yellow | BP | GO:0097006 | regulation of plasma lipoprotein particl... | 17735 | 51   | 1225 | 8   | 3.59   | 0.02498 | 2.228412 | ACSL3;APOE;APOM;CD36;LMF1;MYLIP;SOAT1;SOAT2                                                |
| yellow | BP | GO:0002819 | regulation of adaptive immune response      | 17735 | 91   | 1225 | 12  | 6.4    | 0.02538 | 1.875    | ABC89;CLCF1;DUSP10;GIMAP5;HPX;P2RX7;PTPRC;RC3H1;TNFAIP3;TRAF2;TRAF6;ZP3                    |
| yellow | MF | GO:0005083 | small GTPase regulator activity             | 17735 | 295  | 1225 | 30  | 20.67  | 0.02546 | 1.451379 | ACAP3;ALS2;ARFGF1;ARHGAP4;ARHGFE25;ARHGFE26;DENND2C                                        |

|        |    |            |                                             |       |       |      |     |        |         |          |                                                                                                                                     |
|--------|----|------------|---------------------------------------------|-------|-------|------|-----|--------|---------|----------|-------------------------------------------------------------------------------------------------------------------------------------|
| yellow | CC | GO:0005744 | mitochondrial inner membrane presequence... | 17735 | 10    | 1225 | 3   | 0.68   | 0.02609 | 4.411765 | SLC25A6;TIMM10;TIMM50                                                                                                               |
| yellow | CC | GO:0031010 | ISWI-type complex                           | 17735 | 10    | 1225 | 3   | 0.68   | 0.02609 | 4.411765 | C1orf49;CHRAC1;RSF1                                                                                                                 |
| yellow | BP | GO:0006304 | DNA modification                            | 17735 | 71    | 1225 | 10  | 5      | 0.02622 | 2        | ATF7IP;EXOSC5;MGMT;MLL5;MPG;MUTYH;NTHL1;OGG1;PICK1;PRMT7                                                                            |
| yellow | MF | GO:0004721 | phosphoprotein phosphatase activity         | 17735 | 168   | 1225 | 19  | 11.77  | 0.02622 | 1.614274 | CDCC25A;DLGAP5;DUSP10;DUSP2;DUSP23;DUSP3;MTM1;MTMR1;PHPT1;PPAP2C;PPM1D;PPM1J;PPM1L;PPP                                              |
| yellow | BP | GO:0006886 | intracellular protein transport             | 17735 | 702   | 1225 | 63  | 49.39  | 0.02662 | 1.275562 | ACSL3;AHCYL1;AIP;AP1G1;AP1G2;AP1S1;ARFRP1;ARNTL;ASPSCR1;CCHCR1;CD36;CREB3;ERP29;FBXW11;LPA                                          |
| yellow | BP | GO:0051056 | regulation of small GTPase mediated sign... | 17735 | 367   | 1225 | 36  | 25.82  | 0.0268  | 1.394268 | ACAP3;ALS2;APOE;ARFGEF1;ARHGAP4;ARHGFE25;ARHGFE26;FAM13A;FGD6;FICD;GAPVD1;HRAS;ITSN2;LPA                                            |
| yellow | BP | GO:0097190 | apoptotic signaling pathway                 | 17735 | 202   | 1225 | 22  | 14.21  | 0.02714 | 1.548205 | ADORA2A;ATF4;BOK;CD38;FASTK;FNIP2;GNB2L1;HIPK1;HRAS;NDUFA13;NGFRAP1;PARK7;PHLDA3;PLA2G6;S                                           |
| yellow | BP | GO:1900117 | regulation of execution phase of apoptos... | 17735 | 202   | 1225 | 22  | 14.21  | 0.02714 | 1.548205 | ADORA2A;ATF4;BOK;CD38;FASTK;FNIP2;GNB2L1;HIPK1;HRAS;NDUFA13;NGFRAP1;PARK7;PHLDA3;PLA2G6;S                                           |
| yellow | BP | GO:0009116 | nucleoside metabolic process                | 17735 | 602   | 1225 | 55  | 42.35  | 0.02725 | 1.298701 | ACAP3;AK1;AK4;ALS2;APRT;ARFGEF1;ARFRP1;ARHGAP4;ATL3;ATP5D;ATP5G3;ATP5H;DGUOK;DTMYK;FGD6                                             |
| yellow | MF | GO:0003746 | translation elongation factor activity      | 17735 | 17    | 1225 | 4   | 1.19   | 0.02734 | 3.361345 | EEF1A2;EEF1D;EEF1G;TUFM                                                                                                             |
| yellow | BP | GO:0045786 | negative regulation of cell cycle           | 17735 | 453   | 1225 | 43  | 31.87  | 0.02737 | 1.349231 | AK1;ANAPC11;ANAPC2;ATRIP;BABAM1;BUB1;BUB1B;CDC25A;CDC6;CENPF;CLSPN;CREB3;DCUN1D3;DYNC11                                             |
| yellow | BP | GO:0007250 | activation of NF-kappaB-inducing kinase ... | 17735 | 17    | 1225 | 4   | 1.2    | 0.02771 | 3.333333 | TNFSF15;TRAF2;TRAF6;ZFP91                                                                                                           |
| yellow | BP | GO:0015949 | nucleobase-containing small molecule int... | 17735 | 17    | 1225 | 4   | 1.2    | 0.02771 | 3.333333 | AK1;DTYMK;NME4;TXNRD1                                                                                                               |
| yellow | BP | GO:1901222 | regulation of NIK/NF-kappaB cascade         | 17735 | 17    | 1225 | 4   | 1.2    | 0.02771 | 3.333333 | TNFSF15;TRAF2;TRAF6;ZFP91                                                                                                           |
| yellow | BP | GO:0002711 | positive regulation of T cell mediated i... | 17735 | 25    | 1225 | 5   | 1.76   | 0.02786 | 2.840909 | ABCB9;P2RX7;TRAF2;TRAF6;ZP3                                                                                                         |
| yellow | BP | GO:0007032 | endosome organization                       | 17735 | 25    | 1225 | 5   | 1.76   | 0.02786 | 2.840909 | ALS2;HOOK3;PIK3C3;PLEKHF1;USP8                                                                                                      |
| yellow | BP | GO:0009057 | macromolecule catabolic process             | 17735 | 883   | 1225 | 77  | 62.12  | 0.02811 | 1.239536 | ADAM9;ANAPC11;ANAPC2;APOE;ARIH1;ARNTL;BUB1B;DERL3;DNASE1L2;DVL1;ERCC1;ERLUN2;ETF1;EXOSC5;                                           |
| yellow | MF | GO:0016303 | 1-phosphatidylinositol-3-kinase activity    | 17735 | 10    | 1225 | 3   | 0.7    | 0.02836 | 4.285714 | PIK3C3;PIK3CB;PIK3CG                                                                                                                |
| yellow | MF | GO:0019206 | nucleoside kinase activity                  | 17735 | 10    | 1225 | 3   | 0.7    | 0.02836 | 4.285714 | DGUOK;UCK1;UCKL1                                                                                                                    |
| yellow | CC | GO:0000779 | condensed chromosome, centromeric region    | 17735 | 85    | 1225 | 11  | 5.77   | 0.02838 | 1.906412 | BUB1;BUB1B;CENPF;CENPM;CENPT;CLASP1;DYNC1L1;MAD1L1;REC8;STRA13;SUV420H1                                                             |
| yellow | CC | GO:0019005 | SCF ubiquitin ligase complex                | 17735 | 26    | 1225 | 5   | 1.76   | 0.02844 | 2.840909 | FBX15;FBXO2;FBXO44;FBXW11;FBXW5                                                                                                     |
| yellow | CC | GO:0033116 | endoplasmic reticulum-Golgi intermediate... | 17735 | 26    | 1225 | 5   | 1.76   | 0.02844 | 2.840909 | ERGIC3;SEC22B;TMED1;TMED3;TMED9                                                                                                     |
| yellow | BP | GO:0000076 | DNA replication checkpoint                  | 17735 | 10    | 1225 | 3   | 0.7    | 0.02867 | 4.285714 | CDC6;CLSPN;RAD9A                                                                                                                    |
| yellow | BP | GO:0032482 | Rab protein signal transduction             | 17735 | 10    | 1225 | 3   | 0.7    | 0.02867 | 4.285714 | ALS2;SGSM3;USP6N1                                                                                                                   |
| yellow | BP | GO:0032483 | regulation of Rab protein signal transdu... | 17735 | 10    | 1225 | 3   | 0.7    | 0.02867 | 4.285714 | ALS2;SGSM3;USP6N1                                                                                                                   |
| yellow | BP | GO:0034261 | negative regulation of Ras GTPase activi... | 17735 | 10    | 1225 | 3   | 0.7    | 0.02867 | 4.285714 | ARFGEF1;FICD;HRAS                                                                                                                   |
| yellow | BP | GO:0050860 | negative regulation of T cell receptor s... | 17735 | 10    | 1225 | 3   | 0.7    | 0.02867 | 4.285714 | DUSP3;ELF1;PHPT1                                                                                                                    |
| yellow | BP | GO:0070208 | protein heterotrimerization                 | 17735 | 10    | 1225 | 3   | 0.7    | 0.02867 | 4.285714 | C1QTNF6;COL6A1;COL6A2                                                                                                               |
| yellow | BP | GO:2000114 | regulation of establishment of cell pola... | 17735 | 10    | 1225 | 3   | 0.7    | 0.02867 | 4.285714 | ARFGEF1;GNB2L1;ROCK2                                                                                                                |
| yellow | BP | GO:0006220 | pyrimidine nucleotide metabolic process     | 17735 | 43    | 1225 | 7   | 3.03   | 0.02911 | 2.310231 | DTYMK;NME3;NME4;NT5C;NTHL1;UCK1                                                                                                     |
| yellow | BP | GO:0000887 | M phase of mitotic cell cycle               | 17735 | 370   | 1225 | 36  | 26.03  | 0.02981 | 1.38302  | ANAPC11;ANAPC2;BUB1;BUB1B;CDC25A;CDC6;CDCA8;CDK13;CENPF;CENPM;CENPT;CEP55;CLASP1;CLIP1;D                                            |
| yellow | BP | GO:0051348 | negative regulation of transferase activ... | 17735 | 170   | 1225 | 19  | 11.96  | 0.03026 | 1.588629 | ADORA2A;APOE;DUSP10;DUSP2;DUSP3;DVL1;GNB2L1;HIPK3;LATS1;LATS2;NF1;NPR12;PHPT1;PTPRC;SPRED                                           |
| yellow | MF | GO:0005089 | Rho guanyl-nucleotide exchange factor ac... | 17735 | 73    | 1225 | 10  | 5.11   | 0.03039 | 1.956947 | ALS2;ARHGFE25;ARHGFE26;FGD6;ITSN2;PLEKHG4;PLEKHG5;SOS1;SPATA13;VAV3                                                                 |
| yellow | BP | GO:0032268 | regulation of cellular protein metabolic... | 17735 | 1264  | 1225 | 106 | 88.93  | 0.0304  | 1.191949 | ADAM9;ADORA2A;ALS2;ANAPC11;ANAPC2;APOE;ARFGEF1;ATF4;AVP11;BRAF;BUB1B;CDC25A;CDC6;CDCA8;CDK13;CENPF;CENPM;CENPT;CEP55;CLASP1;CLIP1;D |
| yellow | BP | GO:0002822 | regulation of adaptive immune response b... | 17735 | 83    | 1225 | 11  | 5.84   | 0.03048 | 1.883562 | ABCB9;CLCF1;GIMAP5;HPX;P2RX7;PTPRC;RCH1;TNFAIP3;TRAF2;TRAF6;ZP3                                                                     |
| yellow | BP | GO:0048285 | organelle fission                           | 17735 | 383   | 1225 | 37  | 26.95  | 0.03068 | 1.372913 | ACOT8;ANAPC11;ANAPC2;BUB1;BUB1B;CDC25A;CDC6;CDCA8;CDK13;CENPF;CENPM;CENPT;CEP55;CLASP1;                                             |
| yellow | BP | GO:0033673 | negative regulation of kinase activity      | 17735 | 159   | 1225 | 18  | 11.19  | 0.03069 | 1.608579 | ADORA2A;APOE;DUSP10;DUSP2;DUSP3;DVL1;GNB2L1;HIPK3;LATS1;LATS2;NF1;NPR12;PTPRC;SPRED2;TAOK                                           |
| yellow | BP | GO:0006469 | negative regulation of protein kinase ac... | 17735 | 148   | 1225 | 17  | 10.41  | 0.03101 | 1.633045 | ADORA2A;APOE;DUSP10;DUSP2;DUSP3;DVL1;GNB2L1;HIPK3;LATS1;LATS2;NF1;PTPRC;SPRED2;TAOK3;TNFA                                           |
| yellow | BP | GO:0000280 | nuclear division                            | 17735 | 359   | 1225 | 35  | 25.26  | 0.03102 | 1.38559  | ANAPC11;ANAPC2;BUB1;BUB1B;CDC25A;CDC6;CDCA8;CDK13;CENPF;CENPM;CENPT;CEP55;CLASP1;CLIP1;D                                            |
| yellow | BP | GO:0007067 | mitosis                                     | 17735 | 359   | 1225 | 35  | 25.26  | 0.03102 | 1.38559  | ANAPC11;ANAPC2;BUB1;BUB1B;CDC25A;CDC6;CDCA8;CDK13;CENPF;CENPM;CENPT;CEP55;CLASP1;CLIP1;D                                            |
| yellow | BP | GO:0008033 | tRNA processing                             | 17735 | 73    | 1225 | 10  | 5.14   | 0.03113 | 1.945525 | CTU2;FBL;FTPB3;POP7;PUS1;PUSL1;QTRT1;TRMU;TRPT1;TRUB2                                                                               |
| yellow | CC | GO:0042175 | nuclear outer membrane-endoplasmic retic... | 17735 | 773   | 1225 | 66  | 52.46  | 0.03116 | 1.258101 | ABCB9;ACER3;ACSL3;ALG12;ATL3;AUP1;CANX;CREB3;CREB3L4;CYP11B1;CYP2E1;DERL3;DOLK;DPM3;ERGIC3;                                         |
| yellow | BP | GO:1901361 | organic cyclic compound catabolic proces... | 17735 | 849   | 1225 | 74  | 59.73  | 0.03121 | 1.238908 | ACAP3;AFMID;ALS2;APOE;ARFGEF1;ARFRP1;ARHGAP4;ATL3;ATP5D;ATP5H;CEL;DNASE1L2;ERCC1;ETF1;EXO;                                          |
| yellow | BP | GO:0043900 | regulation of multi-organism process        | 17735 | 205   | 1225 | 22  | 14.42  | 0.03137 | 1.525659 | AP1G1;AP1S1;C1QBP;CD36;CD88;CREB3;MICB;NFKB1L1;P2RX7;ATP5D;ATP5H;DNASE1L2;ERCC1;ETF1;EXO;                                           |
| yellow | BP | GO:0007050 | cell cycle arrest                           | 17735 | 384   | 1225 | 37  | 27.02  | 0.03175 | 1.369356 | AK1;ANAPC11;ANAPC2;ATRIP;BABAM1;BUB1;BUB1B;CDC25A;CDC6;CENPF;CLSPN;DYNC1L1;E2F1;E4F1;FAA                                            |
| yellow | BP | GO:0009141 | nucleoside triphosphate metabolic proces... | 17735 | 495   | 1225 | 46  | 34.82  | 0.03184 | 1.32108  | ACAP3;AK1;AK4;ALS2;ARFGEF1;ARFRP1;ARHGAP4;ATL3;ATP5D;ATP5G3;ATP5H;DGUOK;DTMYK;FGI                                                   |
| yellow | BP | GO:0051640 | organelle localization                      | 17735 | 171   | 1225 | 19  | 12.03  | 0.03189 | 1.579385 | ACTR3;CENPF;CLASP1;DLGAP5;HOOK3;KLHL12;MAP4K2;MTM1;MYH10;NUSAP1;PIK3CG;PREB;RHOT2;RPS11                                             |
| yellow | BP | GO:0046907 | intracellular transport                     | 17735 | 1214  | 1225 | 102 | 85.41  | 0.03189 | 1.19424  | ACSL3;AHCYL1;AIP;ALS2;ANKRD54;AP1G1;AP1G2;AP1S1;APOE;ARFRP1;ARNTL;ASPSCR1;ATP5D;ATP5H;CAPI                                          |
| yellow | MF | GO:0005488 | binding                                     | 17735 | 11799 | 1225 | 851 | 826.67 | 0.03213 | 1.029431 | ABCB9;ABCN9;ABT1;ACAD5;ACAP3;ACBD4;ACCS;ACOT8;ACPS;ACSL3;ACTR1B;ACTR3;ADAM12;ADAM9;ADA                                              |
| yellow | CC | GO:0044297 | cell body                                   | 17735 | 286   | 1225 | 28  | 19.41  | 0.0325  | 1.442555 | ADORA2A;ALS2;APOE;ATP6AP2;CANX;CREB3;DVL1;EEF1A2;GNB2L1;GRIN3A;KLHL17;MAPK1;MYH10;NDUFS                                             |
| yellow | BP | GO:0002448 | mast cell mediated immunity                 | 17735 | 26    | 1225 | 5   | 1.83   | 0.03256 | 2.73224  | LAT;PIK3C;S100A13;SERPINB9;YWHAZ                                                                                                    |
| yellow | MF | GO:0032553 | ribonucleotide binding                      | 17735 | 1846  | 1225 | 149 | 129.34 | 0.03283 | 1.152002 | ABC8B;ABC89;ACSL3;ACTR1B;ACTR3;AK1;AK4;APRT;ARFIP2;ARFRP1;ARL16;ATAD38;ATL3;ATP5D;BCS1L;BM                                          |
| yellow | BP | GO:0044270 | cellular nitrogen compound catabolic pro... | 17735 | 813   | 1225 | 71  | 57.2   | 0.0331  | 1.241259 | ACAP3;AFMID;ALS2;ARFGEF1;ARFRP1;ARHGAP4;ATL3;ATP5D;ATP5H;DNASE1L2;ERCC1;ETF1;EXOSC5;FGD6;                                           |
| yellow | BP | GO:0046700 | heterocycle catabolic process               | 17735 | 813   | 1225 | 71  | 57.2   | 0.0331  | 1.241259 | ACAP3;AFMID;ALS2;ARFGEF1;ARFRP1;ARHGAP4;ATL3;ATP5D;ATP5H;DNASE1L2;ERCC1;ETF1;EXOSC5;FGD6;                                           |
| yellow | BP | GO:0010627 | regulation of intracellular protein kina... | 17735 | 698   | 1225 | 62  | 49.11  | 0.03318 | 1.262472 | ADAM9;AIP;ANKRD54;APOE;ATP6AP2;AVP11;BRAF;C1QBP;CD36;CDK12;CLCF1;DUSP10;DUSP2;DUSP3;EEF11                                           |
| yellow | CC | GO:0005694 | chromosome                                  | 17735 | 631   | 1225 | 55  | 42.82  | 0.0332  | 1.284447 | ASH1L1;BUB1;BUB1B;C1orf86;CDCA8;CENPF;CENPM;CHRA11;CLASP1;CLIP1;DYNC1L1;ERCC1;EXOSC5                                                |
| yellow | CC | GO:0005783 | endoplasmic reticulum                       | 17735 | 1273  | 1225 | 103 | 86.4   | 0.03327 | 1.19213  | ABC89;ACER3;ACSL3;AHCYL1;ALG12;ATL3;AUP1;C1orf10;CANX;CCDC47;CCDC78;CD320;CDS2;CIB1;COL111                                          |
| yellow | BP | GO:0002709 | regulation of T cell mediated immunity      | 17735 | 35    | 1225 | 6   | 2.46   | 0.03351 | 2.439024 | ABCB9;P2RX7;PTPRC;TRAF2;TRAF6;ZP3                                                                                                   |
| yellow | BP | GO:0019637 | organophosphate metabolic process           | 17735 | 1204  | 1225 | 101 | 84.7   | 0.03384 | 1.192444 | ACAP3;ACSL3;ADORA2A;AK1;AK4;ALG12;ALS2;APOE;APRT;ARFGEF1;ARFRP1;ARHGAP4;ATL3;ATP5D;                                                 |
| yellow | CC | GO:0030130 | clathrin coat of trans-Golgi network ves... | 17735 | 11    | 1225 | 3   | 0.75   | 0.0341  | 4        | AFTPH;AP1G2;AP1S1                                                                                                                   |
| yellow | CC | GO:0030897 | HOPS complex                                | 17735 | 11    | 1225 | 3   | 0.75   | 0.0341  | 4        | HOOK3;VPS16;VPS41                                                                                                                   |
| yellow | MF | GO:0016791 | phosphatase activity                        | 17735 | 255   | 1225 | 26  | 17.87  | 0.03463 | 1.454952 | ACPS5;C12orf5;CDC25A;DLGAP5;DUSP10;DUSP2;DUSP23;DUSP3;HDHD3;MTM1;MTMR1;NT5C;PFKFB2;PGP1                                             |
| yellow | BP | GO:0019439 | aromatic compound catabolic process         | 17735 | 815   | 1225 | 71  | 57.34  | 0.03465 | 1.238228 | ACAP3;AFMID;ALS2;ARFGEF1;ARFRP1;ARHGAP4;ATL3;ATP5D;ATP5H;DNASE1L2;ERCC1;ETF1;EXOSC5;FGD6;                                           |
| yellow | CC | GO:0000314 | organelle small ribosomal subunit           | 17735 | 19    | 1225 | 4   | 1.29   | 0.03605 | 3.100775 | MRP315;MRP318A;MRP326                                                                                                               |
| yellow | CC | GO:0005763 | mitochondrial small ribosomal subunit       | 17735 | 19    | 1225 | 4   | 1.29   | 0.03605 | 3.100775 | MRP315;MRP318A;MRP326                                                                                                               |
| yellow | BP | GO:0033619 | membrane protein proteolysis                | 17735 | 45    | 1225 | 7   | 3.17   | 0.03634 | 2.208202 | ADAM9;APOE;NAPSA;P2RX7;SPPL2A;SPPL2B;TRAF6                                                                                          |
| yellow | BP | GO:0043393 | regulation of protein binding               | 17735 | 96    | 1225 | 12  | 6.75   | 0.0366  | 1.777778 | AES;DVL1;MFNG;NOG;NRP1;PARK7;PRMT7;SENP2;SPAG8;TRAF2;TRAF4;TRIB3                                                                    |
| yellow | BP | GO:0032872 | regulation of stress-activated MAPK casc... | 17735 | 151   | 1225 | 17  | 10.62  | 0.03662 | 1.600753 | DUSP10;DUSP3;HIPK3;HRAS;MAGI3;MAP3K10;MAP4K2;MAPK1;SERPINF2;SH3RF1;TAOK3;TP73;TRAF2;TRAF                                            |
| yellow | BP | GO:0002706 | regulation of lymphocyte mediated immuni... | 17735 | 75    | 1225 | 10  | 5.28   | 0.03666 | 1.893939 | ABCB9;CLCF1;GIMAP5;HPX;NCR3;P2RX7;PTPRC;TRAF2;TRAF6;ZP3                                                                             |

|           |    |             |                                             |       |       |      |      |         |          |          |                                                                                               |
|-----------|----|-------------|---------------------------------------------|-------|-------|------|------|---------|----------|----------|-----------------------------------------------------------------------------------------------|
| yellow    | CC | GO:0030660  | Golgi-associated vesicle membrane           | 17735 | 37    | 1225 | 6    | 2.51    | 0.03676  | 2.390438 | AFTPH;AP1G2;AP1S1;SPPL2A;SPPL2B;TMED3                                                         |
| yellow    | MF | GO:0005031  | tumor necrosis factor-activated receptor... | 17735 | 11    | 1225 | 3    | 0.77    | 0.03701  | 3.896104 | TNFRSF18;TNFRSF25;TNFRSF4                                                                     |
| yellow    | MF | GO:0008175  | tRNA methyltransferase activity             | 17735 | 11    | 1225 | 3    | 0.77    | 0.03701  | 3.896104 | TRMT1;TRMT61A;TRMU                                                                            |
| yellow    | BP | GO:00131570 | DNA integrity checkpoint                    | 17735 | 140   | 1225 | 16   | 9.85    | 0.03708  | 1.624365 | ATRIP;BABAM1;CDC6;CLSPN;E2F1;FEM1B;HINFP;PIDD;PSMA7;PSMB4;PSMB5;PSMB7;PSMD9;RAD9A;TAOK        |
| yellow    | MF | GO:0015932  | nucleobase-containing compound transmemb... | 17735 | 27    | 1225 | 5    | 1.89    | 0.03715  | 2.645503 | SLC25A19;SLC25A5;SLC29A2;SLC35B2;SLC35D2                                                      |
| yellow    | BP | GO:0002922  | positive regulation of humoral immune re... | 17735 | 11    | 1225 | 3    | 0.77    | 0.0374   | 3.896104 | GIMAP5;HPX;ZP3                                                                                |
| yellow    | BP | GO:0039528  | cytoplasmic pattern recognition receptor... | 17735 | 11    | 1225 | 3    | 0.77    | 0.0374   | 3.896104 | C1QBP;IRF3;ZC3HAV1                                                                            |
| yellow    | BP | GO:0046501  | protoporphyrinogen IX metabolic process     | 17735 | 11    | 1225 | 3    | 0.77    | 0.0374   | 3.896104 | PPOX;UROD;UROS                                                                                |
| yellow    | CC | GO:0015030  | Cajal body                                  | 17735 | 47    | 1225 | 7    | 3.19    | 0.03792  | 2.194357 | EAF1;FBL;GEMIN7;HINFP;NHP2;SNRPC;WRAP53                                                       |
| yellow    | CC | GO:0005768  | endosome                                    | 17735 | 546   | 1225 | 48   | 37.06   | 0.03914  | 1.295197 | ALS2;AP1G1;AP1G2;APOE;APPL2;ARC;ATP6V0E2;CD8B;CHMP4A;CHMP6;CLCN4;CLIP1;DIAPH2;FAM21B;GAF      |
| yellow    | CC | GO:0000775  | chromosome, centromeric region              | 17735 | 146   | 1225 | 16   | 9.91    | 0.03916  | 1.614531 | BUB1;BUB1B;CDC8;CENPF;CENPM;CENPT;CLASP1;CLP1;DYNC1L1;MAD1L1;MKI67;RAD21;REC8;STRA13;S        |
| yellow    | MF | GO:0032555  | purine ribonucleotide binding               | 17735 | 1831  | 1225 | 147  | 128.29  | 0.03941  | 1.145841 | ABC8B;ABC89;ACSL3;ACTR1B;ACTR3;AK1;AK4;APRT;ARFIP2;ARFRP1;ARL16;ATAD3B;ATL3;ATP5D;BCS1L;BM    |
| yellow    | MF | GO:0003684  | damaged DNA binding                         | 17735 | 46    | 1225 | 7    | 3.22    | 0.03961  | 2.173913 | ERCC1;FANCG;MPG;NEIL1;OGG1;PNKP;TP73                                                          |
| yellow    | MF | GO:0043168  | anion binding                               | 17735 | 2346  | 1225 | 185  | 164.37  | 0.03969  | 1.12551  | ABC8B;ABC89;ACADS;ACBD4;ACCS;ACSL3;ACTR1B;ACTR3;AK1;AK4;APOE;APRT;ARFIP2;ARFRP1;ARL16;ATAC    |
| yellow    | MF | GO:0070566  | adenyllyltransferase activity               | 17735 | 19    | 1225 | 4    | 1.33    | 0.03986  | 3.007519 | FICD;FLAD1;PAPSS1;TUT1                                                                        |
| yellow    | MF | GO:1901677  | phosphate transmembrane transporter acti... | 17735 | 19    | 1225 | 4    | 1.33    | 0.03986  | 3.007519 | SLC25A19;SLC35B2;SLC35D2;SLC37A4                                                              |
| yellow    | MF | GO:0032550  | purine ribonucleoside binding               | 17735 | 1805  | 1225 | 145  | 126.46  | 0.03997  | 1.146608 | ABC8B;ABC89;ACSL3;ACTR1B;ACTR3;AK1;AK4;APRT;ARFIP2;ARFRP1;ARL16;ATAD3B;ATL3;ATP5D;BCS1L;BM    |
| yellow    | CC | GO:0031300  | intrinsic to organelle membrane             | 17735 | 218   | 1225 | 22   | 14.8    | 0.04036  | 1.486486 | ABC89;ACER3;ALG12;CANX;CREB3;CYP2E1;DERL3;DOLK;DPM3;LEM2D;MFNG;P2RX7;PEX16;PPOX;RHOT2;SL      |
| yellow    | MF | GO:0001883  | purine nucleoside binding                   | 17735 | 1807  | 1225 | 145  | 126.6   | 0.04119  | 1.14534  | ABC8B;ABC89;ACSL3;ACTR1B;ACTR3;AK1;AK4;APRT;ARFIP2;ARFRP1;ARL16;ATAD3B;ATL3;ATP5D;BCS1L;BM    |
| yellow    | MF | GO:0032549  | ribonucleoside binding                      | 17735 | 1809  | 1225 | 145  | 126.74  | 0.04245  | 1.144074 | ABC8B;ABC89;ACSL3;ACTR1B;ACTR3;AK1;AK4;APRT;ARFIP2;ARFRP1;ARL16;ATAD3B;ATL3;ATP5D;BCS1L;BM    |
| yellow    | MF | GO:0017076  | purine nucleotide binding                   | 17735 | 1836  | 1225 | 147  | 128.64  | 0.04248  | 1.142724 | ABC8B;ABC89;ACSL3;ACTR1B;ACTR3;AK1;AK4;APRT;ARFIP2;ARFRP1;ARL16;ATAD3B;ATL3;ATP5D;BCS1L;BM    |
| yellow    | CC | GO:0005839  | proteasome core complex                     | 17735 | 20    | 1225 | 4    | 1.36    | 0.04272  | 2.941176 | PSMA7;PSMB4;PSMB5;PSMB7                                                                       |
| yellow    | MF | GO:0035639  | purine ribonucleoside triphosphate bindi... | 17735 | 1796  | 1225 | 144  | 125.83  | 0.04275  | 1.144401 | ABC8B;ABC89;ACSL3;ACTR1B;ACTR3;AK1;AK4;ARFIP2;ARFRP1;ARL16;ATAD3B;ATL3;ATP5D;BCS1L;BMP2K;B    |
| yellow    | CC | GO:0012510  | trans-Golgi network transport vesicle me... | 17735 | 12    | 1225 | 3    | 0.81    | 0.04322  | 3.703704 | AFTPH;AP1G2;AP1S1                                                                             |
| yellow    | CC | GO:0032839  | dendrite cytoplasm                          | 17735 | 12    | 1225 | 3    | 0.81    | 0.04322  | 3.703704 | CANX;KHLH17;MAPK1                                                                             |
| yellow    | CC | GO:0043240  | Fanconi anaemia nuclear complex             | 17735 | 12    | 1225 | 3    | 0.81    | 0.04322  | 3.703704 | C1orf86;FANCG;STRA13                                                                          |
| yellow    | CC | GO:0030131  | clathrin adaptor complex                    | 17735 | 29    | 1225 | 5    | 1.97    | 0.04346  | 2.538071 | AFTPH;AP1G1;AP1G2;AP1S1;GGA1                                                                  |
| yellow    | CC | GO:0031301  | integral to organelle membrane              | 17735 | 196   | 1225 | 20   | 13.3    | 0.04439  | 1.503759 | ABC89;ACER3;CANX;CREB3;DERL3;DOLK;DPM3;LEM2D;MFNG;P2RX7;PEX16;PPOX;RHOT2;SLC22A17;SLC37       |
| yellow    | CC | GO:0016607  | nuclear speck                               | 17735 | 149   | 1225 | 16   | 10.11   | 0.04581  | 1.582591 | CENL2;CDK12;CDK13;EAF1;HIPK1;MAML2;MLLS;NSR19;OGG1;PATL1;PIN1;PIP5K1A;RSRC1;THAP7;TIMM50;     |
| yellow    | CC | GO:0032154  | cleavage furrow                             | 17735 | 39    | 1225 | 6    | 2.65    | 0.04605  | 2.264151 | CEP55;FSD1;MYH10;RAB21;RHOC;STAMBP                                                            |
| yellow    | MF | GO:0060589  | nucleoside-triphosphatase regulator acti... | 17735 | 447   | 1225 | 41   | 31.32   | 0.04611  | 1.309068 | ACAP3;AHS2;ALS2;ARFGEF1;ARHGAP4;ARHGEF25;ARHGEF26;DENND2C;EIF2B2;EIF2B4;FAM13A;FGD6;GAI       |
| yellow    | CC | GO:0000776  | kinetochore                                 | 17735 | 103   | 1225 | 12   | 6.99    | 0.04617  | 1.716738 | BUB1;BUB1B;CENPF;CENPM;CENPT;CLASP1;CLP1;DYNC1L1;MAD1L1;REC8;STRA13;TPR                       |
| yellow    | MF | GO:0003906  | DNA-(apurinic or apyrimidinic site) lyas... | 17735 | 12    | 1225 | 3    | 0.84    | 0.04683  | 3.571429 | NEIL1;NTHL1;OGG1                                                                              |
| yellow    | MF | GO:0015215  | nucleotide transmembrane transporter act... | 17735 | 12    | 1225 | 3    | 0.84    | 0.04683  | 3.571429 | SLC25A19;SLC35B2;SLC35D2                                                                      |
| yellow    | MF | GO:0016307  | phosphatidylinositol phosphate kinase ac... | 17735 | 12    | 1225 | 3    | 0.84    | 0.04683  | 3.571429 | PIP5K1A;PIP5K1B;PIP5K1L                                                                       |
| yellow    | MF | GO:0031996  | thioesterase binding                        | 17735 | 12    | 1225 | 3    | 0.84    | 0.04683  | 3.571429 | TRAF2;TRAF4;TRAF6                                                                             |
| yellow    | MF | GO:0035004  | phosphatidylinositol 3-kinase activity      | 17735 | 12    | 1225 | 3    | 0.84    | 0.04683  | 3.571429 | PIK3C3;PIK3CB;PIK3CG                                                                          |
| yellow    | CC | GO:0000777  | condensed chromosome kinetochore            | 17735 | 81    | 1225 | 10   | 5.5     | 0.04694  | 1.818182 | BUB1;BUB1B;CENPF;CENPM;CENPT;CLASP1;DYNC1L1;MAD1L1;REC8;STRA13                                |
| yellow    | MF | GO:0016922  | ligand-dependent nuclear receptor bindin... | 17735 | 20    | 1225 | 4    | 1.4     | 0.04715  | 2.857143 | MED1;NCOA3;TADA3;TRIM24                                                                       |
| yellow    | MF | GO:0031418  | L-ascorbic acid binding                     | 17735 | 20    | 1225 | 4    | 1.4     | 0.04715  | 2.857143 | LEPRE1;LEPRE2;OGFD2;P4HTM                                                                     |
| yellow    | MF | GO:1901363  | heterocyclic compound binding               | 17735 | 5302  | 1225 | 397  | 371.47  | 0.04782  | 1.068727 | ABC8B;ABC89;ABT1;ACADS;ACSL3;ACTR1B;ACTR3;ADNP;AHCY;AHCYL1;AK1;AK4;ANKRD17;APRT;ARFIP2;AR     |
| yellow    | CC | GO:0005634  | nucleus                                     | 17735 | 5873  | 1225 | 425  | 398.59  | 0.04813  | 1.066259 | ABC8B;ABT1;ADAM12;ADNP;ADPRHL2;AES;AFF1;AFM1D;AFTPH;AIP;ALKBH7;ANAPC11;ANAPC2;ANKRD17;A       |
| yellow    | MF | GO:0030695  | GTPase regulator activity                   | 17735 | 436   | 1225 | 40   | 30.55   | 0.04823  | 1.309329 | ACAP3;ALS2;ARFGEF1;ARHGAP4;ARHGEF25;ARHGEF26;DENND2C;EIF2B2;EIF2B4;FAM13A;FGD6;GAPVD1;IC      |
| yellow    | MF | GO:0001882  | nucleoside binding                          | 17735 | 1818  | 1225 | 145  | 127.37  | 0.04849  | 1.138416 | ABC8B;ABC89;ACSL3;ACTR1B;ACTR3;AK1;AK4;APRT;ARFIP2;ARFRP1;ARL16;ATAD3B;ATL3;ATP5D;BCS1L;BM    |
| yellow    | MF | GO:0008173  | RNA methyltransferase activity              | 17735 | 29    | 1225 | 5    | 2.03    | 0.04874  | 2.463054 | RNMTL1;TRMT1;TRMT2A;TRMT61A;TRMU                                                              |
| yellow    | MF | GO:0043022  | ribosome binding                            | 17735 | 29    | 1225 | 5    | 2.03    | 0.04874  | 2.463054 | C1QBP;EIF3K;ETFI;NAA10;WIBG                                                                   |
| yellow    | MF | GO:0019899  | enzyme binding                              | 17735 | 1084  | 1225 | 90   | 75.95   | 0.04959  | 1.18499  | ACSL3;ADAM9;ADORA2A;ALS2;ANAPC2;ARFIP2;ARIH1;ATP6AP2;BHLHE41;C1QBP;CCNL2;CDC25A;CDC6;CUT      |
| turquoise | CC | GO:0005634  | nucleus                                     | 17735 | 5873  | 3682 | 1527 | 1221.37 | 1.00E-30 | 1.250235 | AAAS;ABHD14B;ABI1;ABLUM2;ACAD9;ACAT2;ACBD6;ACD;ACSL6;ACTL6A;ACTN4;ADAM10;ADAMT55;ADAP1        |
| turquoise | CC | GO:0043231  | intracellular membrane-bounded organelle    | 17735 | 9560  | 3682 | 2438 | 1988.12 | 1.00E-30 | 1.226284 | AAAS;ABCA1;ABCA3;ABCA5;ABCA7;ABC810;ABC86;ABCD1;ABCD2;ABCD3;ABCE1;ABHD10;ABHD14B;ABI1;A       |
| turquoise | CC | GO:0043227  | membrane-bounded organelle                  | 17735 | 9590  | 3682 | 2444 | 1994.36 | 1.00E-30 | 1.225456 | AAAS;ABCA1;ABCA3;ABCA5;ABCA7;ABC810;ABC86;ABCD1;ABCD2;ABCD3;ABCE1;ABHD10;ABHD14B;ABI1;A       |
| turquoise | CC | GO:0043229  | intracellular organelle                     | 17735 | 10522 | 3682 | 2596 | 2188.18 | 1.00E-30 | 1.186374 | AAAS;ABCA1;ABCA3;ABCA5;ABCA7;ABC810;ABC86;ABCD1;ABCD2;ABCD3;ABCE1;ABHD10;ABHD14B;ABI1;A       |
| turquoise | CC | GO:0043226  | organelle                                   | 17735 | 10552 | 3682 | 2603 | 2194.42 | 1.00E-30 | 1.18619  | AAAS;ABCA1;ABCA3;ABCA5;ABCA7;ABC810;ABC86;ABCD1;ABCD2;ABCD3;ABCE1;ABHD10;ABHD14B;ABI1;A       |
| turquoise | CC | GO:0044424  | intracellular part                          | 17735 | 12103 | 3682 | 2943 | 2516.97 | 1.00E-30 | 1.169263 | AAAS;AACS;AAMP;AANAT;AASDHPPT;ABCA1;ABCA3;ABCA5;ABCA7;ABC810;ABC86;ABCD1;ABCD2;ABCD3;A        |
| turquoise | CC | GO:0005737  | cytoplasm                                   | 17735 | 9016  | 3682 | 2189 | 1874.99 | 1.00E-30 | 1.167473 | AAAS;AACS;AAMP;AANAT;AASDHPPT;ABCA1;ABCA3;ABCA5;ABCA7;ABC810;ABC86;ABCD1;ABCD2;ABCD3;A        |
| turquoise | CC | GO:0005622  | intracellular                               | 17735 | 12344 | 3682 | 2986 | 2567.09 | 1.00E-30 | 1.163185 | AAAS;AACS;AAMP;AANAT;AASDHPPT;ABCA1;ABCA3;ABCA5;ABCA7;ABC810;ABC86;ABCD1;ABCD2;ABCD3;A        |
| turquoise | CC | GO:0044464  | cell part                                   | 17735 | 14451 | 3682 | 3193 | 3005.27 | 7.70E-28 | 1.062467 | AAAS;AACS;AAMP;AANAT;AASDHPPT;ABCA1;ABCA3;ABCA5;ABCA7;ABC810;ABC86;ABCD1;ABCD2;ABCD3;A        |
| turquoise | CC | GO:0005623  | cell                                        | 17735 | 14452 | 3682 | 3193 | 3005.48 | 8.60E-28 | 1.062393 | AAAS;AACS;AAMP;AANAT;AASDHPPT;ABCA1;ABCA3;ABCA5;ABCA7;ABC810;ABC86;ABCD1;ABCD2;ABCD3;A        |
| turquoise | CC | GO:0044444  | cytoplasmic part                            | 17735 | 6562  | 3682 | 1643 | 1364.65 | 2.60E-27 | 1.203972 | AACS;AANAT;AASDHPPT;ABCA1;ABCA3;ABCA5;ABCA7;ABC810;ABC86;ABCD1;ABCD2;ABCD3;ABCE1;ABHD1        |
| turquoise | CC | GO:0044446  | intracellular organelle part                | 17735 | 6219  | 3682 | 1568 | 1293.32 | 4.50E-27 | 1.212384 | AAAS;ABCA3;ABCA5;ABCA7;ABC810;ABC86;ABCD1;ABCD2;ABCD3;ABCE1;ABHD14B;ACADM;ACADSVL;ACA         |
| turquoise | BP | GO:0044260  | cellular macromolecule metabolic process    | 17735 | 6621  | 3682 | 1724 | 1458.89 | 1.30E-26 | 1.18172  | AANAT;ABCA1;ABCE1;ABI1;ABI2;ACADM;ACADVL;ACD;ACTL6A;ACVR1C;ACVR2A;ACVRL1;ADAM10;ADM2;A        |
| turquoise | CC | GO:0044422  | organelle part                              | 17735 | 6321  | 3682 | 1584 | 1314.53 | 5.30E-26 | 1.204993 | AAAS;ABCA3;ABCA5;ABCA7;ABC810;ABC86;ABCD1;ABCD2;ABCD3;ABCE1;ABHD14B;ACADM;ACADSVL;ACA         |
| turquoise | BP | GO:0044237  | cellular metabolic process                  | 17735 | 8597  | 3682 | 2142 | 1894.28 | 1.70E-24 | 1.130773 | AACS;AANAT;AASDHPPT;ABCA1;ABC86;ABCD1;ABCD2;ABCD3;ABCE1;ABHD10;ABI1;ABI2;ACADM;ACADSVL;A      |
| turquoise | BP | GO:0044267  | cellular protein metabolic process          | 17735 | 3210  | 3682 | 890  | 707.3   | 3.30E-18 | 1.258306 | AANAT;ABCA1;ABI1;ABI2;ACADVL;ACTL6A;ACVR1C;ACVR2A;ACVRL1;ADAM10;ADM2;ADORA1;ADRBK1;AGA        |
| turquoise | BP | GO:0044238  | primary metabolic process                   | 17735 | 8755  | 3682 | 2138 | 1929.1  | 4.50E-18 | 1.108289 | AAAS;ABCA3;AACS;AANAT;AASDHPPT;ABCA1;ABCD1;ABCD2;ABCD3;ABCE1;ABHD10;ABI1;ABI2;ACADM;ACADSVL;A |
| turquoise | BP | GO:0043170  | macromolecule metabolic process             | 17735 | 7334  | 3682 | 1828 | 1615.99 | 1.20E-17 | 1.131195 | AANAT;AASDHPPT;ABCA1;ABCE1;ABI1;ABI2;ACADM;ACADVL;ACD;ACTL6A;ACVR1C;ACVR2A;ACVRL1;ADAM        |
| turquoise | BP | GO:0017104  | organic substance metabolic process         | 17735 | 8996  | 3682 | 2178 | 1982.2  | 2.50E-16 | 1.098779 | AAAS;AACS;AANAT;AASDHPPT;ABCA1;ABC86;ABCD1;ABCD2;ABCD3;ABCE1;ABHD10;ABI1;ABI2;ACADM;ACA       |
| turquoise | MF | GO:0005488  | binding                                     | 17735 | 11799 | 3682 | 2671 | 2505.78 | 2.70E-16 | 1.065936 | AACS;AAMP;AASDHPPT;ABCA1;ABCA10;ABCA3;ABCA5;ABCA7;ABC810;ABC86;ABCD2;ABCD3                    |
| turquoise | CC | GO:0044428  | nuclear part                                | 17735 | 2482  | 3682 | 667  | 516.16  | 2.00E-15 | 1.292235 | AAAS;ABHD14B;ACAT2;ACD;ACTL6A;ADD3;AEBP2;AFF4;AGAP2;AGPAT5;AHR;AKAP11;AKAP8L;AKIRIN1;AKT      |
| turquoise | BP | GO:0008152  | metabolic process                           | 17735 | 9452  | 3682 | 2260 | 2082.68 | 3.40E-14 | 1.08514  | AAAS;AACS;AANAT;AASDHPPT;ABCA1;ABC86;ABCD1;ABCD2;ABCD3;ABCE1;ABHD10;ABI1;ABI2;ACADM;ACA       |



|              |            |                                              |       |      |      |      |         |          |          |                                                                                             |
|--------------|------------|----------------------------------------------|-------|------|------|------|---------|----------|----------|---------------------------------------------------------------------------------------------|
| turquoise BP | GO:0080090 | regulation of primary metabolic process      | 17735 | 4337 | 3682 | 1073 | 955.63  | 2.00E-07 | 1.12282  | ABCA1;ABCD2;ACADM;ACADVL;ACAP1;ACAP2;ACD;ACSL6;ACTL6A;ACVR2A;ACVRL1;ADAP1;ADORA1;AEBP2      |
| turquoise MF | GO:0004674 | protein serine/threonine kinase activity     | 17735 | 434  | 3682 | 137  | 92.17   | 2.30E-07 | 1.486384 | ACVR1C;ACVR2A;ACVRL1;ADCK1;ADCK2;ADCK3;ADRBK1;AKT1;ANKK1;ARAF;AURKC;BCR;BMPR1A;BMPR2;C      |
| turquoise BP | GO:0022403 | cell cycle phase                             | 17735 | 852  | 3682 | 249  | 187.73  | 2.60E-07 | 1.326373 | ACTR1A;AKT1;ANAPC10;ANLN;APC;APEX1;ARHGFE2;ARPP19;ASPM;AURKC;AZI1;BACH1;BAG6;BCAT1;BORA     |
| turquoise BP | GO:1901360 | organic cyclic compound metabolic proces...  | 17735 | 5578 | 3682 | 1352 | 1229.07 | 1.00E-07 | 1.100019 | AAAT1;ABC86;ABCD1;ABCD3;ABCE1;ACADVL;ACAP1;ACAP2;ACD;ACSL6;ACTL6A;ACVR1C;ACVR2A;ACVRL1;A    |
| turquoise MF | GO:0016740 | transferase activity                         | 17735 | 1705 | 3682 | 444  | 362.09  | 2.70E-07 | 1.226214 | AAANAT;AASDHPTT;ACAD10;ACAT1;ACAT2;ACVR1C;ACVR2A;ACVRL1;ADCK1;ADCK2;ADCK3;ADRBK1;AGL;AG     |
| turquoise MF | GO:0036094 | small molecule binding                       | 17735 | 2525 | 3682 | 632  | 536.24  | 2.80E-07 | 1.178577 | AACS;ABCA10;ABCA3;ABCA5;ABCA7;ABCB10;ABCB6;ABCC2;ABCD1;ABCD2;ABCD3;ABCE1;ABCF3;AC           |
| turquoise MF | GO:0035639 | purine ribonucleoside triphosphate bindi...  | 17735 | 1796 | 3682 | 463  | 381.42  | 5.10E-07 | 1.213885 | AACS;ABCA1;ABCA10;ABCA3;ABCA5;ABCA7;ABCB10;ABCB6;ABCC2;ABCD1;ABCD2;ABCD3;ABCE1;ABCF3;AC     |
| turquoise BP | GO:0000209 | protein polyubiquitination                   | 17735 | 167  | 3682 | 65   | 36.8    | 5.30E-07 | 1.766304 | ANAPC10;BIRC2;CDC26;CDC27;CHFR;DDB2;DZIP3;ERCC8;FBXO4;G2E3;HACE1;HDAC6;ITCH;LRSAM1;MARCH    |
| turquoise BP | GO:0019222 | regulation of metabolic process              | 17735 | 4834 | 3682 | 1181 | 1065.14 | 5.50E-07 | 1.108774 | ABCA1;ACADM;ACADVL;ACAP1;ACAP2;ACD;ACSL6;ACTL6A;ACVR1C;ACVR2A;ACVRL1;ADAP1;ADM2;            |
| turquoise MF | GO:0001883 | purine nucleoside binding                    | 17735 | 1807 | 3682 | 465  | 383.76  | 6.00E-07 | 1.211695 | AACS;ABCA1;ABCA10;ABCA3;ABCA5;ABCA7;ABCB10;ABCB6;ABCC2;ABCD1;ABCD2;ABCD3;ABCE1;ABCF3;AC     |
| turquoise MF | GO:0032550 | purine ribonucleoside binding                | 17735 | 1805 | 3682 | 463  | 383.33  | 9.50E-07 | 1.207837 | AACS;ABCA1;ABCA10;ABCA3;ABCA5;ABCA7;ABCB10;ABCB6;ABCC2;ABCD1;ABCD2;ABCD3;ABCE1;ABCF3;AC     |
| turquoise MF | GO:0001882 | nucleoside binding                           | 17735 | 1818 | 3682 | 466  | 386.09  | 9.50E-07 | 1.206972 | AACS;ABCA1;ABCA10;ABCA3;ABCA5;ABCA7;ABCB10;ABCB6;ABCC2;ABCD1;ABCD2;ABCD3;ABCE1;ABCF3;AC     |
| turquoise BP | GO:0006996 | organelle organization                       | 17735 | 2139 | 3682 | 557  | 471.31  | 1.10E-06 | 1.181812 | ABCA1;ABCD1;ABCD3;ABI1;ABI2;ABLIM2;ABR;ACD;ACP2;ACTL6A;ACTN4;AEBP2;AKT1;AKTIP;ALDOA;ANAPC   |
| turquoise MF | GO:0032549 | ribonucleoside binding                       | 17735 | 1809 | 3682 | 463  | 384.18  | 1.20E-06 | 1.205164 | AACS;ABCA1;ABCA10;ABCA3;ABCA5;ABCA7;ABCB10;ABCB6;ABCC2;ABCD1;ABCD2;ABCD3;ABCE1;ABCF3;AC     |
| turquoise MF | GO:0017076 | purine nucleotide binding                    | 17735 | 1836 | 3682 | 469  | 389.91  | 1.30E-06 | 1.202842 | AACS;ABCA1;ABCA10;ABCA3;ABCA5;ABCA7;ABCB10;ABCB6;ABCC2;ABCD1;ABCD2;ABCD3;ABCE1;ABCF3;AC     |
| turquoise BP | GO:0060255 | regulation of macromolecule metabolic pr...  | 17735 | 4178 | 3682 | 1028 | 920.59  | 1.40E-06 | 1.116675 | ACADVL;ACD;ACTL6A;ACVR2A;ACVRL1;ADM2;ADORA1;AGAP2;AGAP3;AGER;AHR;AIM2;AIMP2;AKT1;A          |
| turquoise BP | GO:0046907 | intracellular transport                      | 17735 | 1214 | 3682 | 334  | 267.5   | 1.50E-06 | 1.248598 | AAAS;ABCA1;ABCD1;ACD;ADORA1;AGAP3;AKAP5;AKT1;AKTIP;ALKBH5;AP1B1;AP152;AP2A2;AP3M1;AP3S2;    |
| turquoise MF | GO:0032553 | purine ribonucleotide binding                | 17735 | 1831 | 3682 | 467  | 388.85  | 1.70E-06 | 1.200977 | AACS;ABCA1;ABCA10;ABCA3;ABCA5;ABCA7;ABCB10;ABCB6;ABCC2;ABCD1;ABCD2;ABCD3;ABCE1;ABCF3;AC     |
| turquoise BP | GO:0006397 | mRNA processing                              | 17735 | 405  | 3682 | 129  | 89.24   | 2.30E-06 | 1.44554  | ALKBH5;BCAS2;BUD13;CCNH;CD2BP2;CDC40;CD273;CDK11A;CDK11B;CDK7;CLNS1A;CLP1;CNOT2;CNOT3;C     |
| turquoise MF | GO:0032553 | ribonucleotide binding                       | 17735 | 1846 | 3682 | 469  | 392.04  | 2.50E-06 | 1.196306 | AACS;ABCA1;ABCA10;ABCA3;ABCA5;ABCA7;ABCB10;ABCB6;ABCC2;ABCD1;ABCD2;ABCD3;ABCE1;ABCF3;AC     |
| turquoise BP | GO:2000112 | regulation of cellular macromolecule bio...  | 17735 | 3117 | 3682 | 782  | 686.81  | 2.50E-06 | 1.138597 | ACD;ACTL6A;ACVR2A;ACVRL1;AEBP2;AGER;AHR;AIM2;AKT1;ANKRD49;APEX1;ARGLU1;ARHGAP22;ARH         |
| turquoise CC | GO:0016604 | nuclear body                                 | 17735 | 276  | 3682 | 90   | 57.4    | 2.60E-06 | 1.567944 | ALKBH5;APEX1;ATPAF2;BMI1;CCNL1;CD2BP2;CDK2;CDK9;CHFR;CLK3;COIL;CPSF6;CSNK1A1;COX11;DAPK3;D  |
| turquoise MF | GO:0003676 | nucleic acid binding                         | 17735 | 3299 | 3682 | 796  | 700.61  | 3.10E-06 | 1.136153 | AB2;ACD;AEBP1;AEBP2;AGGF1;AHR;AIM2;AIMP1;AKAP8L;ALKBH8;ANG;APEX1;APEX2;APTX;ARID2;ARID4A;   |
| turquoise BP | GO:0006974 | response to DNA damage stimulus              | 17735 | 608  | 3682 | 181  | 133.97  | 3.40E-06 | 1.351049 | ACD;ACTL6A;ALKBH8;APC;APEX1;APEX2;APLF;APTX;ASF1A;ASTE1;ATRX;BAG6;BCLAF1;BRCA2;BRCC3;BRIP1; |
| turquoise BP | GO:0010556 | regulation of macromolecule biosynthetic...  | 17735 | 3197 | 3682 | 798  | 704.43  | 4.30E-06 | 1.132831 | ACD;ACTL6A;ACVR2A;ACVRL1;AEBP2;AGER;AHR;AIM2;AKT1;ANG;ANKRD13C;ANKRD49;APEX1;ARGLU1;AR      |
| turquoise CC | GO:0031902 | late endosome membrane                       | 17735 | 78   | 3682 | 34   | 16.22   | 4.60E-06 | 2.096178 | ABCA5;ARL8B;ATG9A;CD63;CHMP1B;CHMP2A;CHMP2B;CYBASC3;HGS;HLA-DMA;HLA-DML1;LAMTOR3;MAR        |
| turquoise BP | GO:0031326 | regulation of cellular biosynthetic proc...  | 17735 | 3328 | 3682 | 827  | 733.3   | 5.50E-06 | 1.127779 | ABCA1;ACADM;ACADVL;ACD;ACSL6;ACTL6A;ACVR2A;ACVRL1;AEBP2;AGER;AHR;AIM2;AKAP5;AKT1;ANG;AN     |
| turquoise CC | GO:0044451 | neoplasm part                                | 17735 | 823  | 3682 | 223  | 171.15  | 5.60E-06 | 1.302951 | ACTL6A;AEBP2;AHR;ALKBH5;APEX1;APL1;ARID4A;ARID5A;ATF1;ATPAF2;ATXN7L3;BMI1;CCNC;CCNH;CCNL    |
| turquoise BP | GO:0045184 | establishment of protein localization        | 17735 | 1288 | 3682 | 348  | 283.8   | 5.60E-06 | 1.226216 | ABCA1;ACAP1;ACD;ACTN4;ADORA1;AGAP2;AGAP3;AIM2;AKAP5;AKT1;AKTIP;ANGX1;AP1A1R;AP1B1;AP        |
| turquoise BP | GO:0000280 | nuclear division                             | 17735 | 359  | 3682 | 115  | 79.1    | 6.00E-06 | 1.453856 | ANAPC10;ANLN;APC;ARHGFE2;ARPP19;ASPM;AURKC;BORA;CASCS;CCNA2;CCNG1;CCNG2;CD28;CD2AP;CDC      |
| turquoise BP | GO:0007067 | mitosis                                      | 17735 | 359  | 3682 | 115  | 79.1    | 6.00E-06 | 1.453856 | ANAPC10;ANLN;APC;ARHGFE2;ARPP19;ASPM;AURKC;BORA;CASCS;CCNA2;CCNG1;CCNG2;CD28;CD2AP;CDC      |
| turquoise CC | GO:0005794 | Golgi apparatus                              | 17735 | 1158 | 3682 | 301  | 240.82  | 6.20E-06 | 1.249896 | ABCA1;ABCA5;ABCA7;ABCB6;ABCD3;ADAM10;ADI1;AIMP1;AKR7A2;AKTIP;AP1A1R;AP1B1;AP152;AP3M1;AP    |
| turquoise BP | GO:0006355 | regulation of transcription, DNA-depende...  | 17735 | 2869 | 3682 | 720  | 632.16  | 7.00E-06 | 1.138952 | ACTL6A;ACVR2A;ACVRL1;AEBP2;AGER;AHR;AIM2;AKT1;ANKRD49;APEX1;ARGLU1;ARHGAP22;ARHGFE2;ARII    |
| turquoise BP | GO:0048285 | organelle fission                            | 17735 | 383  | 3682 | 121  | 84.39   | 7.30E-06 | 1.433819 | ANAPC10;ANLN;APC;ARHGFE2;ARPP19;ASPM;AURKC;BORA;CASCS;CCNA2;CCNG1;CCNG2;CD28;CD2AP;CDC      |
| turquoise BP | GO:0007050 | cell cycle arrest                            | 17735 | 384  | 3682 | 121  | 84.61   | 8.30E-06 | 1.430091 | AKT1;ANAPC10;APC;BRCC3;BRIP1;CAB39;CAB39L;CASCS;CCNA2;CCNE2;CCNG1;CCNG2;CDC25C;CDC26;CD     |
| turquoise BP | GO:0009889 | regulation of biosynthetic process           | 17735 | 3356 | 3682 | 831  | 739.47  | 9.20E-06 | 1.123778 | ABCA1;ACADM;ACADVL;ACD;ACSL6;ACTL6A;ACVR2A;ACVRL1;AEBP2;AGER;AHR;AIM2;AKAP5;AKT1;ANG;AN     |
| turquoise BP | GO:0000082 | G1/S transition of mitotic cell cycle        | 17735 | 215  | 3682 | 75   | 47.37   | 9.60E-06 | 1.583281 | AKT1;BACH1;BCAT1;CAMK2D;CCNE2;CCNH;CD7;CDCT3;CDK1;CDK2;CDK7;CDKN1B;CDKN2C;CDKN3;CDT1;C      |
| turquoise BP | GO:0051252 | regulation of RNA metabolic process          | 17735 | 2953 | 3682 | 738  | 650.67  | 9.60E-06 | 1.134216 | ACTL6A;ACVR2A;ACVRL1;AEBP2;AGER;AHR;AIM2;AKT1;ANKRD49;APEX1;ARGLU1;ARHGAP22;ARHGFE2;ARII    |
| turquoise MF | GO:0004722 | protein serine/threonine phosphatase act...  | 17735 | 51   | 3682 | 25   | 10.83   | 9.80E-06 | 2.308403 | CDKN3;CTDNEP1;CTDSP1;CYCS;MTMR6;PDP1;PEEF1;PPM1B;PPM1G;PPP1CA;PPP1CB;PPP1CC;PPP1R15B;PP     |
| turquoise BP | GO:0000087 | M phase of mitotic cell cycle                | 17735 | 370  | 3682 | 117  | 81.53   | 9.80E-06 | 1.435055 | ANAPC10;ANLN;APC;ARHGFE2;ARPP19;ASPM;AURKC;BORA;CASCS;CCNA2;CCNG1;CCNG2;CD28;CD2AP;CDC      |
| turquoise CC | GO:0005739 | mitochondrion                                | 17735 | 1488 | 3682 | 375  | 309.45  | 9.90E-06 | 1.211827 | ABCA10;ABCB6;ABCD1;ABCD2;ABCD3;ABCE1;ABCD5;ACAD10;ACAD9;ACAD9A;ACAD9B;ACAD9C;ACAD9L;ACAT1;A |
| turquoise CC | GO:0000775 | chromosome, centromeric region               | 17735 | 146  | 3682 | 53   | 30.36   | 1.10E-05 | 1.745718 | APC;AURKC;CASCS;CBX3;CENPE;CENPK;CENPL;CENPQ;CENPW;CSNK1A1;DAPK3;DAXX;DCTN2;DYNTL3;HELL     |
| turquoise CC | GO:0044431 | Golgi apparatus part                         | 17735 | 654  | 3682 | 181  | 136.01  | 1.10E-05 | 1.330785 | ABCA5;ABCA7;ACBD3;ADAM10;AP1B1;AP152;APH1A;ARFGAP1;ARFGAP2;ARHGFE2;ARFIP1;ARRB1;ATP2C1;     |
| turquoise BP | GO:0015031 | protein transport                            | 17735 | 1245 | 3682 | 335  | 274.33  | 1.20E-05 | 1.221157 | ABCA1;ACAP1;ACD;ACTN4;ADORA1;AGAP2;AGAP3;AIM2;AKAP5;AKT1;AKTIP;ANGX1;AP1A1R;AP1B1;AP        |
| turquoise CC | GO:0000502 | proteasome complex                           | 17735 | 65   | 3682 | 29   | 13.52   | 1.30E-05 | 2.14497  | ADRM1;DNAJB2;IDE;PSMA1;PSMA2;PSMA3;PSMA4;PSMA6;PSMA8;PSMB1;PSMB3;PSMC1;PSMC2;PSMC3;F        |
| turquoise CC | GO:0042175 | nuclear outer membrane-endoplasmic retic...  | 17735 | 773  | 3682 | 209  | 160.76  | 1.30E-05 | 1.300075 | ACSL4;ACSL6;AGPAT5;ALG1;ALG10;ALG11;ALG13;ALG2;ALG3;ALG6;ANKRD13C;ANOS;APH1A;ARL6P1;ARL6    |
| turquoise BP | GO:2001141 | regulation of RNA biosynthetic process       | 17735 | 2889 | 3682 | 722  | 636.57  | 1.30E-05 | 1.134204 | ACTL6A;ACVR2A;ACVRL1;AEBP2;AGER;AHR;AIM2;AKT1;ANKRD49;APEX1;ARGLU1;ARHGAP22;ARHGFE2;ARII    |
| turquoise BP | GO:0033554 | cellular response to stress                  | 17735 | 1209 | 3682 | 326  | 266.39  | 1.40E-05 | 1.22377  | ACADVL;ACD;ACTL6A;AGAP3;AIDA;AKT1;ALKBH8;ANXA1;APC;APEX1;APEX2;APLF;APTX;ARFGAP1;ARHGFE2;   |
| turquoise BP | GO:0051171 | regulation of nitrogen compound metaboli...  | 17735 | 3496 | 3682 | 861  | 770.32  | 1.40E-05 | 1.117717 | ABCA1;ACADVL;ACAP1;ACAP2;ACD;ACTL6A;ACVR2A;ACVRL1;ADAP1;AEBP2;ACAP2;AGAP3;AGER;AFG2;AF      |
| turquoise MF | GO:0016772 | transferase activity, transferring phosph... | 17735 | 889  | 3682 | 240  | 188.8   | 1.50E-05 | 1.271186 | AASDHPTT;ACAD10;ACVR1C;ACVR2A;ACVRL1;ADCK1;ADCK2;ADCK3;ADRBK1;AK3;AKD1;AKT1;ANKK1;ARAF;     |
| turquoise MF | GO:0032182 | small conjugating protein binding            | 17735 | 71   | 3682 | 31   | 15.08   | 1.80E-05 | 2.055703 | AGAP3;AGL;BAG6;BRCC3;CASP8AP2;DNAJB2;DYRK2;DZIP3;FAM175A;HDAC6;IDE;KIF18A;MARK4;NEDD4;RA    |
| turquoise BP | GO:0032774 | RNA biosynthetic process                     | 17735 | 3293 | 3682 | 813  | 725.59  | 1.90E-05 | 1.120467 | ACTL6A;ACVR2A;ACVRL1;ADRM1;AEBP1;AEBP2;AFF4;AGER;AHR;AIM2;AKT1;ANG;ANKRD49;APEX1;ARGLU1     |
| turquoise CC | GO:0005789 | endoplasmic reticulum membrane               | 17735 | 757  | 3682 | 204  | 157.43  | 2.00E-05 | 1.295814 | ACSL4;ACSL6;AGPAT5;ALG1;ALG10;ALG11;ALG13;ALG2;ALG3;ALG6;ANKRD13C;ANOS;APH1A;ARL6P1;ARL6    |
| turquoise MF | GO:0003723 | RNA binding                                  | 17735 | 851  | 3682 | 230  | 180.73  | 2.10E-05 | 1.272617 | AIMP1;ALKBH8;ANG;APEX1;APTX;AUH;CARHSP1;CDK9;CDKN2AIP;CHERP;CNOT6;CNP;COPPS5;PEB2;PENG3;    |
| turquoise CC | GO:0043234 | protein complex                              | 17735 | 3294 | 3682 | 771  | 685.03  | 2.50E-05 | 1.125498 | AAAS;ABCA7;ABCB6;ACTL6A;ACTN4;ACTR1A;ACVR1C;ACVR2A;ADRM1;AEBP2;AGL;AHR;AIM2;AIMP1;AKAP7;    |
| turquoise CC | GO:0044432 | endoplasmic reticulum part                   | 17735 | 905  | 3682 | 238  | 188.21  | 2.60E-05 | 1.264545 | ACSL4;ACSL6;AGPAT5;ALG1;ALG10;ALG11;ALG13;ALG2;ALG3;ALG6;ANKRD13C;ANOS;APH1A;ARL6P1;ARL6    |
| turquoise BP | GO:0044248 | cellular catabolic process                   | 17735 | 1692 | 3682 | 439  | 372.82  | 2.70E-05 | 1.177512 | ABCD1;ABCD2;ABCD3;ABCE1;ABHD10;ACADM;ACADSB;ACADVL;ACAP1;ACAP2;ACAT1;ACOT7;ACSF3;ADA;A      |
| turquoise BP | GO:0006351 | transcription, DNA-dependent                 | 17735 | 3208 | 3682 | 791  | 706.86  | 3.20E-05 | 1.119033 | ACTL6A;ACVR2A;ACVRL1;ADRM1;AEBP1;AEBP2;AFF4;AGER;AHR;AIM2;AKT1;ANG;ANKRD49;APEX1;ARGLU1     |
| turquoise BP | GO:0006281 | DNA repair                                   | 17735 | 388  | 3682 | 119  | 85.49   | 3.90E-05 | 1.391976 | ACTL6A;APEX1;APEX2;APLF;APTX;ASF1A;ASTE1;ATRX;BRCA2;BRCC3;BRIP1;CCNH;CDK1;CDK2;CDK7;CDK9;CE |
| turquoise CC | GO:0044429 | mitochondrial part                           | 17735 | 740  | 3682 | 198  | 153.89  | 4.30E-05 | 1.286633 | ABCB10;ABCB6;ABCD3;ACADM;ACADSB;ACADVL;ACAT1;ACSL4;ACSL6;ACSS1;AGPAT5;AIFM3;AK3;ALDH4A1     |
| turquoise BP | GO:0008380 | RNA splicing                                 | 17735 | 328  | 3682 | 103  | 72.27   | 4.50E-05 | 1.425211 | BCAS2;BUD13;CD2BP2;CDC40;CLK1;CLK3;CLK4;CLNS1A;CLP1;CPSF1;CPSF2;DDX41;DGRG1;FG1;GEMIN2;GE   |
| turquoise BP | GO:0010468 | regulation of gene expression                | 17735 | 3347 | 3682 | 821  | 737.49  | 4.60E-05 | 1.113235 | ACTL6A;ACVR2A;ACVRL1;ADM2;AEBP2;AGER;AHR;AIM2;AKT1;ANG;ANKRD49;APEX1;APTX;ARGLU1;ARHGA      |
| turquoise MF | GO:0005524 | ATP binding                                  | 17735 | 1462 | 3682 | 370  | 310.49  | 4.80E-05 | 1.191665 | AACS;ABCA1;ABCA10;ABCA3;ABCA5;ABCA7;ABCB10;ABCB6;ABCC2;ABCD1;ABCD2;ABCD3;ABCE1;ABCF3;AC     |
| turquoise BP | GO:0006793 | phosphorus metabolic process                 | 17735 | 2513 | 3682 | 628  | 553.72  | 5.60E-05 | 1.134147 | ABCA1;ABCD1;ABCD3;ABI1;ABI2;ACADVL;ACAP1;ACAP2;ACD;ACTL6A;ACVR2A;ACVRL1;ADAP1;ADM2;         |
| turquoise BP | GO:0051726 | regulation of cell cycle                     | 17735 | 736  | 3682 | 206  | 162.17  | 5.80E-05 | 1.270272 | AKT1;ANAPC10;ANLN;APC;APEX1;AURKC;BAP1;BCR;BIRC2;BORA;BRCA2;BRCC3;BRIP1;CAB39;CAB39L;CAS    |
| turquoise BP | GO:0008104 | protein localization                         | 17735 | 1586 | 3682 | 411  | 349.46  | 5.80E-05 | 1.1761   | ABCA1;ACAP1;ACD;ACTN4;ADORA1;AGAP2;AGAP3;AIM2;AKAP5;AKAP7;AKT1;AKTIP;ANGX1;AP1A1R;ANKRD1    |
| turquoise BP | GO:0044271 | cellular nitrogen compound biosynthetic ...  | 17735 | 3726 | 3682 | 906  | 821     | 6.00E-05 | 1.103532 | AAANAT;ABCA1;ABCB6;ACADM;ACTL6A;ACVR2A;ACVRL1;ADA;ADC;AD1;ADRM1;ADSS1;AEBP1;AEBP2;AFF4      |
| turquoise CC | GO:0043228 | non-membrane-bounded organelle               | 17735 | 3122 | 3682 | 729  | 649.26  | 6.30E-05 | 1.122817 | AAAS;ABHD14B;ABI1;ABI2;ABLIM2;ACADVL;ACAT2;ACD;ACTL6A;ACTL9;ACTN4;ACTR1A;ACTR6;ADAM10;AD    |
| turquoise CC | GO:0043228 | intracellular non-membrane-bounded organ...  | 17735 | 3122 | 3682 | 729  | 649.26  | 6.30E-05 | 1.122817 | AAAS;ABHD14B;ABI1;ABI2;ABLIM2;ACADVL;ACAT2;ACD;ACTL6A;ACTL9;ACTN4;ACTR1A;ACTR6;ADAM10;AD    |



|              |            |                                             |       |      |      |     |        |          |          |                                                                                               |
|--------------|------------|---------------------------------------------|-------|------|------|-----|--------|----------|----------|-----------------------------------------------------------------------------------------------|
| turquoise MF | GO:0030554 | adenyl nucleotide binding                   | 17735 | 1495 | 3682 | 376 | 317.5  | 7.30E-05 | 1.184252 | AACS;ABCA1;ABCA10;ABCA3;ABCA5;ABCA7;ABCB10;ABCB6;ABCC2;ABCD1;ABCD2;ABCD3;ABCE1;ABCF3;AC       |
| turquoise BP | GO:0000226 | microtubule cytoskeleton organization       | 17735 | 279  | 3682 | 89  | 61.48  | 7.70E-05 | 1.447625 | APC;ARHGFE2;ARL2;AURKC;BLOC1S2;BORA;BRCA2;CASC5;CCDC88A;CCDC88B;CCP110;CDK1;CDK2;CDK5R1;      |
| turquoise BP | GO:0018130 | heterocycle biosynthetic process            | 17735 | 3650 | 3682 | 887 | 804.25 | 8.20E-05 | 1.102891 | AAAT;ABCA1;ABCB6;ACTL6A;ACVR2A;ACVRL1;ADA;ADRM1;ADSSL1;AEBP1;AEBP2;AFF4;AGER;AHR;AIM2;A       |
| turquoise CC | GO:0010008 | endosome membrane                           | 17735 | 311  | 3682 | 93  | 64.68  | 8.30E-05 | 1.437848 | ABCA5;ABCA7;APPL1;ARL8B;ATG9A;ATP11B;B2M;CD164;CD63;CHMP1A;CHMP1B;CHMP2A;CHMP2B;CLIP3;        |
| turquoise BP | GO:0070936 | protein K48-linked ubiquitination           | 17735 | 37   | 3682 | 19  | 8.15   | 8.60E-05 | 2.331288 | HACE1;ITCH;MARCH6;PARK2;PELI1;RNF146;RNF187;RNF6;TOPORS;UBE2A;UBE2D1;UBE2D2;UBE2E1;UBE2Z;     |
| turquoise BP | GO:0070646 | protein modification by small protein re... | 17735 | 77   | 3682 | 32  | 16.97  | 9.20E-05 | 1.885681 | ATXN7L3;BAP1;BRCC3;COP52;COP54;COP55;COP56;DNAJB2;ENY2;GSP1;ITCH;MYO21;OTUD5;PSMD14;SENI      |
| turquoise BP | GO:0043687 | post-translational protein modification     | 17735 | 195  | 3682 | 66  | 42.97  | 9.20E-05 | 1.535955 | ALG1;ALG10;ALG10B;ALG11;ALG13;ALG2;ALG3;ALG6;ARSA;ARSK;ATG5;B3GNT2;B3GNT5;B4GALT3;B4GALT      |
| turquoise CC | GO:0044440 | endosomal part                              | 17735 | 320  | 3682 | 95  | 66.55  | 9.40E-05 | 1.427498 | ABCA5;ABCA7;APPL1;ARL8B;ATG9A;ATP11B;B2M;CD164;CD63;CHMP1A;CHMP1B;CHMP2A;CHMP2B;CLIP3;        |
| turquoise MF | GO:0043130 | ubiquitin binding                           | 17735 | 60   | 3682 | 26  | 12.74  | 9.60E-05 | 2.040816 | AGAP3;AGL;BAG6;BRCC3;DZIP3;DZP3;FAM175A;HDAC6;HIF1;KIF18A;MARK4;NEDD4;RAD23A;RBCK             |
| turquoise MF | GO:0032559 | adenyl ribonucleotide binding               | 17735 | 1491 | 3682 | 374 | 316.65 | 9.60E-05 | 1.181115 | AACS;ABCA1;ABCA10;ABCA3;ABCA5;ABCA7;ABCB10;ABCB6;ABCC2;ABCD1;ABCD2;ABCD3;ABCE1;ABCF3;AC       |
| turquoise BP | GO:0048193 | Golgi vesicle transport                     | 17735 | 181  | 3682 | 62  | 39.88  | 1.00E-04 | 1.554664 | AP1B1;AP1S2;ARFGAP1;ARFGFE2;ARRB1;BET1;BLZF1;COG3;COG4;COG6;COPE;COP21;CSK;DTNBP1;EXOC5;C     |
| turquoise BP | GO:0019219 | regulation of nucleobase-containing comp... | 17735 | 3414 | 3682 | 832 | 752.25 | 1.00E-04 | 1.106015 | ABCA1;ACADVL;ACAP1;ACAP2;ACD;ACTL6A;ACVR2A;ACVRL1;ADAP1;AEBP2;AGAP2;AGAP3;AGER;AGFG2;AF       |
| turquoise BP | GO:0019438 | aromatic compound biosynthetic process      | 17735 | 3638 | 3682 | 883 | 801.61 | 1.00E-04 | 1.101533 | AAAT;ABCA1;ABCB6;ACTL6A;ACVR2A;ACVRL1;ADA;ADRM1;ADSSL1;AEBP1;AEBP2;AFF4;AGER;AHR;AIM2;A       |
| turquoise CC | GO:0000151 | ubiquitin ligase complex                    | 17735 | 150  | 3682 | 51  | 31.19  | 0.00011  | 1.635139 | ANAPC10;BM11;BRCC3;CBL1;CDC26;CDC27;CRBN;CUL2;CUL4B;CUL5;EUF5;DCAF11;DCAF11;DCAF13;DCUN1D1;D  |
| turquoise BP | GO:0022613 | ribonucleoprotein complex biogenesis        | 17735 | 233  | 3682 | 76  | 51.34  | 0.00011  | 1.480327 | BYSL;CD2BP2;CLNS1A;CLP1;CNOT7;DCAF13;DDX3X;DICER1;DIS3;EIF2A;EIF3D;EIF6;ERAL1;ER1;FCF1;FRG1;G |
| turquoise BP | GO:0051329 | interphase of mitotic cell cycle            | 17735 | 408  | 3682 | 122 | 89.9   | 0.00011  | 1.357063 | ACTR1A;AKT1;ANAPC10;APEX1;ARPP19;AZ1;BACH1;BCAT1;BRCA2;CANMK2;CCNA2;CCNE2;CCNG1;CCNH;C        |
| turquoise BP | GO:0033036 | macromolecule localization                  | 17735 | 1852 | 3682 | 471 | 408.07 | 0.00011  | 1.154214 | ABCA1;ABCA5;ABCA7;ABCD1;ACAP1;ACD;ACSL4;ACSL6;ACTN4;ACV1C;ADORA1;AGAP2;AGAP3;AIM2;AKAP        |
| turquoise BP | GO:0006796 | phosphate-containing compound metabolic ... | 17735 | 2466 | 3682 | 614 | 543.36 | 0.00011  | 1.130006 | ABCA1;ABCD3;ABI1;ABI2;ACADVL;ACAP1;ACAP2;ACSL6;ACV1C;ACVR2A;ACVRL1;ADA;ADAM10;AD              |
| turquoise BP | GO:0034654 | nucleobase-containing compound biosynthe... | 17735 | 3583 | 3682 | 870 | 789.49 | 0.00011  | 1.101977 | ABCA1;ACTL6A;ACVR2A;ACVRL1;ADA;ADRM1;ADSSL1;AEBP1;AEBP2;AFF4;AGER;AHR;AIM2;AKAAS;AKT1;ALU     |
| turquoise CC | GO:0005681 | spliceosomal complex                        | 17735 | 147  | 3682 | 50  | 30.57  | 0.00013  | 1.635559 | APIS;BCAS2;CDC40;DDX41;DGCGR14;FRG1;GEMIN2;GEMIN6;IVNS1ABP;KIA1967;LSM3;PHF5A;PLRG1;PPLI3;    |
| turquoise BP | GO:0051325 | interphase                                  | 17735 | 414  | 3682 | 123 | 91.22  | 0.00013  | 1.348389 | ACTR1A;AKT1;ANAPC10;APEX1;ARPP19;AZ1;BACH1;BCAT1;BRCA2;CANMK2;CCNA2;CCNE2;CCNG1;CCNH;C        |
| turquoise BP | GO:0045786 | negative regulation of cell cycle           | 17735 | 453  | 3682 | 133 | 99.82  | 0.00013  | 1.332398 | AKT1;ANAPC10;APC;BRCC3;BRIP1;CAB39;CAB39L;CASC5;CASP3;CCNA2;CCNE2;CCNG1;CCNG2;CD25C;CDC       |
| turquoise BP | GO:0031398 | positive regulation of protein ubiquitin... | 17735 | 133  | 3682 | 48  | 29.31  | 0.00014  | 1.637666 | AIMP2;ANAPC10;ANGPT1;BMI1;CDC26;CDC27;CDK1;DNAJB2;FBXO4;FBXO5;FBXW7;HSPBP1;LRKK2;MALT1;I      |
| turquoise BP | GO:0016197 | endosomal transport                         | 17735 | 140  | 3682 | 50  | 30.85  | 0.00014  | 1.620746 | ABCA1;AKTIP;CHMP2A;CHMP2B;DPY30;EEA1;EP515;FAM109B;GCC2;HGS;HMGXB4;HOOK1;HOOK2;KIAA10         |
| turquoise CC | GO:0005768 | endosome                                    | 17735 | 546  | 3682 | 149 | 113.55 | 0.00014  | 1.312197 | ABCA5;ABCA7;AP1AR;APPL1;ARFGFE2;ARL8B;ATG9A;ATP11B;ATP7A;B2M;BLOC1S2;CALCR1;CCDC115;CD16      |
| turquoise CC | GO:0000159 | protein phosphatase type 2A complex         | 17735 | 20   | 3682 | 12  | 4.16   | 0.00015  | 2.884615 | CYCS;PPP2C8;PPP2R1A;PPP2R2A;PPP2R3A;PPP2R4;PPP2R5A;PPP2R5B;PPP2R5C;PPP2R5D;PPP2R5E;STRN       |
| turquoise BP | GO:0031575 | mitotic cell cycle G1/S transition check... | 17735 | 82   | 3682 | 33  | 18.07  | 0.00015  | 1.826231 | CDK2;CDKN1B;DGK2;DLG1;FBXO31;MDM2;MUC1;NBN;PSMA1;PSMA2;PSMA3;PSMA4;PSMA6;PSMA8;PSM            |
| turquoise MF | GO:0019783 | small conjugating protein-specific prote... | 17735 | 52   | 3682 | 23  | 11.04  | 0.00016  | 2.083333 | BAP1;BRCC3;MYSM1;OTUD5;SENP1;SENP6;UCHL5;USP1;USP12;USP14;USP15;USP16;USP19;USP21;USP25;I     |
| turquoise BP | GO:0000075 | cell cycle checkpoint                       | 17735 | 243  | 3682 | 78  | 53.54  | 0.00017  | 1.456855 | AKT1;ANAPC10;APC;BRCC3;BRIP1;CASC5;CCNA2;CCNE2;CCNG1;CCNG2;CCDC27;CDC7;CDK1;I                 |
| turquoise BP | GO:0051351 | positive regulation of ligase activity      | 17735 | 86   | 3682 | 34  | 18.95  | 0.00018  | 1.794195 | ANAPC10;BM11;CDC26;CDC27;CDK1;FBXO5;GCLM;MID1IP1;PSMA1;PSMA2;PSMA3;PSMA4;PSMA6;PSMA8;         |
| turquoise BP | GO:0071379 | G1/S transition checkpoint                  | 17735 | 86   | 3682 | 34  | 18.95  | 0.00018  | 1.794195 | AKT1;CDK2;CDKN1B;DGK2;DLG1;FBXO31;MDM2;MUC1;NBN;PSMA1;PSMA2;PSMA3;PSMA4;PSMA6;PSMA8;          |
| turquoise BP | GO:0071156 | regulation of cell cycle arrest             | 17735 | 266  | 3682 | 84  | 58.61  | 0.00018  | 1.433203 | AKT1;ANAPC10;APC;BRCC3;BRIP1;CASC5;CCNA2;CCNE2;CCNG1;CCNG2;CCDC25C;CCDC26;CCDC27;CDK1;I       |
| turquoise BP | GO:0034660 | ncRNA metabolic process                     | 17735 | 285  | 3682 | 89  | 62.8   | 0.00018  | 1.417197 | AIMP1;AIMP2;ALKBH8;CLNS1A;CLP1;DCAF13;DGCGR8;DICER1;DIS3;EEF1E1;ELAC2;ER11;FARS2;FARSA;FCF1;F |
| turquoise BP | GO:0031571 | mitotic cell cycle G1/S transition DNA d... | 17735 | 73   | 3682 | 30  | 16.09  | 0.00019  | 1.864512 | CDK2;CDKN1B;DGK2;FBXO31;MDM2;MUC1;PSMA1;PSMA2;PSMA3;PSMA4;PSMA6;PSMA8;PSMB1;PSMB3;            |
| turquoise BP | GO:0000279 | M phase                                     | 17735 | 528  | 3682 | 151 | 116.34 | 0.00019  | 1.29792  | ANAPC10;ANLN;APC;ARHGFE2;ARPP19;ASPM;AURKC;BAG6;BORA;BRCA2;CASC5;CCNA2;CCNG1;CCNG2;CCD        |
| turquoise BP | GO:0007093 | mitotic cell cycle checkpoint               | 17735 | 138  | 3682 | 49  | 30.41  | 2.00E-04 | 1.611312 | ANAPC10;APC;CCNA2;CCNG1;CCNG2;CCDC27;CDK1;CDK2;CDK7;CDK11;CDK12;CDK13;CDK14;CDK15;CDK16;CD    |
| turquoise BP | GO:0051340 | regulation of ligase activity               | 17735 | 100  | 3682 | 38  | 22.03  | 0.00021  | 1.724921 | ANAPC10;BM11;CDC26;CDC27;CDK1;CDK2;FBXO5;FEM1A;GCLM;MAD2L1;MID1IP1;PSMA1;PSMA2;PSMA3;F        |
| turquoise MF | GO:0016301 | kinase activity                             | 17735 | 762  | 3682 | 202 | 161.83 | 0.00021  | 1.248223 | ACVR1C;ACVR2A;ACVRL1;ADCK1;ADCK2;ADCK3;ADRBK1;AK3;AKD1;AKT1;ANKK1;ARAF;AURKC;BCR;BMPR1;       |
| turquoise BP | GO:0051301 | cell division                               | 17735 | 474  | 3682 | 137 | 104.44 | 0.00022  | 1.311758 | ANAPC10;ANLN;APC;ARHGFE2;ARL8B;ARPP19;ASPM;AURKC;BM11;BORA;BRCA2;CASC5;CCNA2;CCNG2;CCN        |
| turquoise BP | GO:2000045 | regulation of G1/S transition of mitotic... | 17735 | 104  | 3682 | 39  | 22.92  | 0.00024  | 1.701571 | CDK7;CDK2;CDKN1B;DDX3X;DGK2;DLG1;E2F7;FBXO31;MDM2;MUC1;NBN;PKD2;PSMA1;PSMA2;PSMA3;PS          |
| turquoise BP | GO:1901575 | organic substance catabolic process         | 17735 | 1842 | 3682 | 465 | 405.87 | 0.00025  | 1.145687 | ABCD2;ABCD3;ABCE1;ABHD10;ACADM;ACADS;ABCE1;ABHD10;ACADM;ACADS;ABCE1;ABHD10;ACADM;ACADS;A      |
| turquoise BP | GO:0006487 | protein N-linked glycosylation              | 17735 | 98   | 3682 | 37  | 21.59  | 0.00029  | 1.713756 | ALG1;ALG10;ALG10B;ALG11;ALG13;ALG2;ALG3;ALG6;B4GALT3;B4GALT6;DDOST;DOLPP1;DPM1;EDEM3;GF       |
| turquoise BP | GO:0034130 | toil-like receptor 1 signaling pathway      | 17735 | 68   | 3682 | 28  | 14.98  | 3.00E-04 | 1.869159 | ATF1;ATF2;CDK1;CHUK;CREB1;IKBK6;JUN;MAP2K2;MAP2K4;MAP3K1;MAP3K7;MAPK8;MAPKAP2;MAPKAF          |
| turquoise BP | GO:0051439 | regulation of ubiquitin-protein ligase a... | 17735 | 78   | 3682 | 31  | 17.19  | 0.00031  | 1.803374 | ANAPC10;CDC26;CDC27;CDK1;CDK2;FBXO5;MAD2L1;PSMA1;PSMA2;PSMA3;PSMA4;PSMA6;PSMA8;PSMB1          |
| turquoise CC | GO:0031300 | intrinsic to organelle membrane             | 17735 | 218  | 3682 | 67  | 45.34  | 0.00033  | 1.477724 | ABCB10;ABCB6;ABCD1;ASPH;B3GNT1;BCAP31;BNIP1;CCDC90A;CHST2;CLN3;CSGALNACT1;CSGALNACT2;DEI      |
| turquoise MF | GO:0004672 | protein kinase activity                     | 17735 | 595  | 3682 | 161 | 126.36 | 0.00033  | 1.274137 | ACVR1C;ACVR2A;ACVRL1;ADCK1;ADCK2;ADCK3;ADRBK1;AKT1;ANKK1;ARAF;AURKC;BCR;BMPR1A;BMPR2;C        |
| turquoise CC | GO:0005759 | mitochondrial matrix                        | 17735 | 286  | 3682 | 84  | 59.48  | 0.00034  | 1.412239 | ACADM;ACADS8;ACADVL;ACAT1;ACSS1;AK3;ALDH4A1;ARG2;ATAD3A;ATP5C1;ATP5E;ATP5F1;AUH;BCAT2;B       |
| turquoise BP | GO:1901362 | organic cyclic compound biosynthetic pro... | 17735 | 3752 | 3682 | 902 | 826.72 | 0.00034  | 1.091059 | AAAT;ABCA1;ABCB6;ABCD3;ACTL6A;ACVR2A;ACVRL1;ADA;ADRM1;ADSSL1;AEBP1;AEBP2;AFF4;AGER;AHR;AIM    |
| turquoise BP | GO:0018279 | protein N-linked glycosylation via aspar... | 17735 | 92   | 3682 | 35  | 20.27  | 0.00035  | 1.72669  | ALG1;ALG10;ALG10B;ALG11;ALG13;ALG2;ALG3;ALG6;B4GALT3;B4GALT6;DDOST;DOLPP1;DPM1;EDEM3;GF       |
| turquoise BP | GO:0010565 | regulation of cellular ketone metabolic ... | 17735 | 170  | 3682 | 57  | 37.46  | 0.00035  | 1.521623 | ABCD2;ACADM;ACADVL;AKT1;ANXA1;ARPP19;AZIN1;CAB39;CAB39L;CNR1;COMT;DKK3;DLAT;FGFR4;GNMT;       |
| turquoise BP | GO:0034134 | toil-like receptor 2 signaling pathway      | 17735 | 72   | 3682 | 29  | 15.86  | 0.00036  | 1.828499 | ATF1;ATF2;CDK1;CHUK;CREB1;F2RL1;IKBK6;JUN;MAP2K2;MAP2K4;MAP3K1;MAP3K7;MAPK8;MAPKAP2;M         |
| turquoise BP | GO:0000375 | RNA splicing, via transesterification re... | 17735 | 215  | 3682 | 69  | 47.37  | 0.00038  | 1.456618 | BCAS2;BUD13;CD2BP2;CDC40;CLNS1A;CLP1;CPSF1;DCP5;DDX41;DGCGR14;FRG1;GEMIN2;GEMIN6;GTF2F2;H     |
| turquoise MF | GO:0019003 | GDP binding                                 | 17735 | 45   | 3682 | 20  | 9.56   | 4.00E-04 | 2.09205  | ARL2;ARL8B;KRAS;PRPS2;RAB10;RAB11B;RAB12;RAB14;RAB18;RAB22A;RAB27B;RAB28;RAB2A;RAB4;RAB5      |
| turquoise BP | GO:0000079 | regulation of cyclin-dependent protein k... | 17735 | 86   | 3682 | 33  | 18.95  | 0.00043  | 1.741425 | AKT1;APC;CASP3;CCNA2;CCNC;CCND3;CCNE2;CCNG1;CCNT2;CCNY;CCNL1;CCDC25C;CCNA2;CCND3;CC           |
| turquoise CC | GO:0005770 | late endosome                               | 17735 | 150  | 3682 | 49  | 31.19  | 0.00044  | 1.571016 | ABCA5;AP1AR;ARL8B;ATG9A;ATP7A;CD63;CHMP1B;CHMP2A;CHMP2B;CLN3;CST3;CTNS;CYBASC3;DERL1;H        |
| turquoise BP | GO:0018196 | peptidyl-asparagine modification            | 17735 | 93   | 3682 | 35  | 20.49  | 0.00045  | 1.70815  | ALG1;ALG10;ALG10B;ALG11;ALG13;ALG2;ALG3;ALG6;B4GALT3;B4GALT6;DDOST;DOLPP1;DPM1;EDEM3;GF       |
| turquoise BP | GO:0031145 | anaphase-promoting complex-dependent pro... | 17735 | 83   | 3682 | 32  | 18.29  | 0.00047  | 1.74959  | ANAPC10;CDC26;CDC27;CDK1;CDK2;FBXO5;MAD2L1;PSMA1;PSMA2;PSMA3;PSMA4;PSMA6;PSMA8;PSMB1          |
| turquoise BP | GO:0042787 | protein ubiquitination involved in ubiq...  | 17735 | 60   | 3682 | 25  | 13.22  | 5.00E-04 | 1.891074 | FBXO4;FBXW7;HACE1;HECTD2;HECTD3;HECW2;HERC4;ITCH;LNX1;MDM2;NEDD4;PARK2;PTEN;RBBP6;RCH         |
| turquoise MF | GO:0019900 | kinase binding                              | 17735 | 397  | 3682 | 112 | 84.31  | 0.00052  | 1.328431 | ABIG2;ACVRL1;ADAM10;AKAP7;AKT1;APC;APPL1;ARRB1;ATF2;BORA;CAB39;CCDC88A;CCNA2;CCNC;CCND3;C     |
| turquoise MF | GO:0016773 | phosphotransferase activity, alcohol gro... | 17735 | 706  | 3682 | 186 | 149.93 | 0.00052  | 1.240579 | ACVR1C;ACVR2A;ACVRL1;ADCK1;ADCK2;ADCK3;ADRBK1;AKT1;ANKK1;ARAF;AURKC;BCR;BMPR1A;BMPR2;C        |
| turquoise BP | GO:0006886 | intracellular protein transport             | 17735 | 702  | 3682 | 191 | 154.68 | 0.00053  | 1.234807 | ACD;ADORA1;AGAP3;AKAAS;AKT1;AP1B1;AP1S2;AP2A2;AP352;APPBP2;ARF1P1;AP352;APPBP2;ARF1P1;A       |
| turquoise BP | GO:0031396 | regulation of protein ubiquitination        | 17735 | 180  | 3682 | 59  | 39.66  | 0.00054  | 1.487645 | AIMP2;ANAPC10;ANGPT1;ARRB1;ATG5;BMI1;CDC26;CDC27;CDK1;CDK2;DAXX;DNAJB2;FBXO4;FBXO5;FBXW       |
| turquoise CC | GO:0031967 | organelle envelope                          | 17735 | 825  | 3682 | 210 | 171.57 | 0.00054  | 1.22399  | AAAS;ABCB10;ABCB6;ABCD3;ACADVL;ACAT1;ACSL4;ACSL6;AGPAT5;AIFM3;AKIRIN1;ANKLE1;ANXA1;APEH;A     |
| turquoise BP | GO:0016482 | cytoplasmic transport                       | 17735 | 719  | 3682 | 195 | 158.43 | 0.00056  | 1.230827 | AGAP3;AKT1;AKTIP;ALKBH5;AP3M1;ARFGFE2;ASPH;BET1;BLZF1;BMPR1A;BUD13;C12orf52;CAMK1;CAMK2I      |
| turquoise MF | GO:0004843 | ubiquitin-specific protease activity        | 17735 | 46   | 3682 | 20  | 9.77   | 0.00057  | 2.047083 | BAP1;BRCC3;MYSM1;OTUD5;UCHL5;USP1;USP12;USP14;USP15;USP16;USP19;USP21;USP25;USP37;USP41;      |
| turquoise BP | GO:0051436 | negative regulation of ubiquitin-protein... | 17735 | 67   | 3682 | 27  | 14.76  | 0.00057  | 1.829268 | ANAPC10;CDC26;CDC27;CDK1;CDK2;FBXO5;MAD2L1;PSMA1;PSMA2;PSMA3;PSMA4;PSMA6;PSMA8;PSMB3;PSM      |
| turquoise BP | GO:0000084 | S phase of mitotic cell cycle               | 17735 | 140  | 3682 | 48  | 30.85  | 0.00057  | 1.555916 | APEX1;BRCA2;CCNH;CDC73;CDK2;CDK7;CDKN1B;CDT1;CHMP1A;CKS1B;CRLF3;CUL4B;DDX11;DNA2;LSM11;I      |
| turquoise BP | GO:0005840 | ribosome                                    | 17735 | 206  | 3682 | 63  | 42.84  | 0.00057  | 1.470588 | APEX1;DDX3X;DNAJC21;FMR1;FXR2;HSPA14;MRP11;MRP13;MRP15;MRP18;MRP19;MRP22;MRP24;M              |
| turquoise CC | GO:0005730 | nucleolus                                   | 17735 | 622  | 3682 | 163 | 129.35 | 0.00057  | 1.260147 | ABHD14B;ACAT2;AFF4;AGAP2;AKAP11;AKTIP;ALS2C8R;ANG;AP1AR;APEX1;APTX;ARFGAP2;ARID5A;ARL4A;A     |



|              |            |                                             |       |      |      |     |        |         |          |                                                                                                               |
|--------------|------------|---------------------------------------------|-------|------|------|-----|--------|---------|----------|---------------------------------------------------------------------------------------------------------------|
| turquoise MF | GO:0016780 | phosphotransferase activity, for other s... | 17735 | 16   | 3682 | 9   | 3.4    | 0.00229 | 2.647059 | AASDHPTT;CDIPT;CDS1;CEPT1;CRLS1;EPT1;PIGF;SGMS1;SGMS2                                                         |
| turquoise BP | GO:0051403 | stress-activated MAPK cascade               | 17735 | 213  | 3682 | 65  | 46.93  | 0.00233 | 1.385042 | AIDA;AKT1;ATF1;ATF2;CCM2;CD27;CDK1;COPSS;CREB1;DAB2IP;DAXX;DIXDC1;DUSP19;F2RL1;FCER1A;GAB1                    |
| turquoise CC | GO:0016607 | nuclear speck                               | 17735 | 149  | 3682 | 46  | 30.99  | 0.00238 | 1.48435  | ALKH85;APEX1;ATPAF2;CCNL1;CD2BP2;CLK3;CSNK1A1;CXCK1;DDX3X;DYRK1A;EAF2;FAM76B;FCER1;FYTTD1;                    |
| turquoise CC | GO:0016605 | PML body                                    | 17735 | 73   | 3682 | 26  | 15.18  | 0.00241 | 1.71278  | CDK9;CHFR;DAPK3;DAXX;EIF3E;HIRA;KHLH20;LRCH4;MORC3;NSMCE2;PIA54;PTEN;RBI;RNF6;SIRT1;SKIL;SMI                  |
| turquoise BP | GO:0000077 | DNA damage checkpoint                       | 17735 | 134  | 3682 | 44  | 29.53  | 0.00248 | 1.49001  | BRCC3;BRIP1;CCNA2;CCNG1;CDK1;CDK2;CDKN1B;DGK2;FAM175A;FBXO31;MAPKAPK2;MDM2;MSH2;MUC1                          |
| turquoise MF | GO:0031593 | polyubiquitin binding                       | 17735 | 28   | 3682 | 13  | 5.95   | 0.00255 | 2.184874 | AGAP3;AGL;BAG6;BRCC3;DNAJB2;DZIP3;FAM175A;HNG;RAD23A;TAB2;ZFAND6;ZANB1;ZRNAN3                                 |
| turquoise BP | GO:0000216 | M/G1 transition of mitotic cell cycle       | 17735 | 80   | 3682 | 29  | 17.63  | 0.00258 | 1.644923 | CDC7;CDK2;CDT1;DBF4;GMN2;MCM5;ORC2;ORC3;ORC4;PSMA1;PSMA2;PSMA3;PSMA4;PSMA6;PSMA8;PSI                          |
| turquoise BP | GO:0071158 | positive regulation of cell cycle arrest    | 17735 | 80   | 3682 | 29  | 17.63  | 0.00258 | 1.644923 | CDK2;CDKN1B;CRLF3;MDM2;MUC1;PKD2;PSMA1;PSMA2;PSMA3;PSMA4;PSMA10;PTEN;RAD23A;RCHY1;SENP1;SC                    |
| turquoise BP | GO:0032434 | regulation of proteasomal ubiquitin-depe... | 17735 | 56   | 3682 | 22  | 12.34  | 0.00262 | 1.78282  | AKT1;BAG6;DNAJB2;FBXO5;GIP1;HSPBP1;LRRK2;MADL1;MDM2;PSMA1;PSMA2;PSMA3;PSMA4;PSMA10;PTEN;RAD23A;RCHY1;SENP1;SC |
| turquoise CC | GO:0044391 | ribosomal subunit                           | 17735 | 134  | 3682 | 42  | 27.87  | 0.00263 | 1.506997 | DDX3X;FXR2;MRPL1;MRPL13;MRPL15;MRPL22;MRPL3;MRPL32;MRPL2;MRP517;MRP518B;MRP518C;MRP                           |
| turquoise BP | GO:0051297 | centrosome organization                     | 17735 | 63   | 3682 | 24  | 13.88  | 0.00277 | 1.729107 | ARL2;BRCA2;CCP110;CDK1;CDK2;CEP135;CEP152;CEP250;CETN3;CHORDC1;CNTROB;HAUS1;HAUS3;HAUS6;                      |
| turquoise MF | GO:0008565 | protein transporter activity                | 17735 | 87   | 3682 | 30  | 18.48  | 0.00292 | 1.623377 | AP1B1;AP152;AP2A2;AP3S2;AP4S1;CALCR1;CCT6B;COG3;IPO11;IPO13;IPO4;KPN2A;KPN3A;KPN5A;MCL1;RA                    |
| turquoise BP | GO:0031023 | microtubule organizing center organizati... | 17735 | 67   | 3682 | 25  | 14.76  | 0.00318 | 1.693767 | ARL2;BRCA2;CCP110;CDK1;CDK2;CEP135;CEP152;CEP250;CETN3;CHORDC1;CNTROB;GCC2;HAUS1;HAUS3;H                      |
| turquoise CC | GO:0000793 | condensed chromosome                        | 17735 | 167  | 3682 | 50  | 34.73  | 0.00322 | 1.439678 | ADD3;AURKC;CASC5;CBX3;CDK2;CENPE;CENPK;CENPW;CHMP1A;CSNK1A1;DYNLT3;HMGB1;HMGB2;ITGB3E                         |
| turquoise CC | GO:0005740 | mitochondrial envelope                      | 17735 | 520  | 3682 | 134 | 108.14 | 0.00323 | 1.239134 | ABCB10;ABC6;ABCD3;ACADVL;ACAT1;ACSL4;ACSL6;AGPAT5;AIFM3;ANXA1;APEX2;ARL2;ATAD3A;ATP5C1;A                      |
| turquoise BP | GO:0002474 | antigen processing and presentation of p... | 17735 | 99   | 3682 | 34  | 21.81  | 0.00327 | 1.558918 | B2M;BAP31;CTS5;CYBA;HLA-A;IFI30;ITGA5;PSMA1;PSMA2;PSMA3;PSMA4;PSMA6;PSMA8;PSMA9;PSMB3;I                       |
| turquoise CC | GO:0033116 | endoplasmic reticulum-Golgi intermediate... | 17735 | 26   | 3682 | 12  | 5.41   | 0.00328 | 2.218115 | BCAP31;ERGIC2;LMAN1;LMAN2;RAB2A;STX5;TMED10;TMED2;TMED5;TMED7;VMA21;VMP1                                      |
| turquoise BP | GO:0007031 | peroxisome organization                     | 17735 | 34   | 3682 | 15  | 7.49   | 0.00334 | 2.00267  | ABCD1;ABCD3;MFF;PEX1;PEX11G;PEX13;PEX14;PEX2;PEX3;RAB8B;SCP2;TMEM135;ZFAN2                                    |
| turquoise BP | GO:0031098 | stress-activated protein kinase signalin... | 17735 | 216  | 3682 | 65  | 47.59  | 0.00336 | 1.365833 | AIDA;AKT1;ATF1;ATF2;CCM2;CD27;CDK1;COPSS;CREB1;DAB2IP;DAXX;DIXDC1;DUSP19;F2RL1;FCER1A;GAB1                    |
| turquoise CC | GO:0022624 | proteasome accessory complex                | 17735 | 23   | 3682 | 11  | 4.78   | 0.00344 | 2.301255 | PSMC1;PSMC2;PSMC3;PSMC5;PSMC6;PSMD10;PSMD13;PSMD14;PSMD4;PSMD8;PSME1                                          |
| turquoise BP | GO:0006471 | protein complex assembly                    | 17735 | 783  | 3682 | 204 | 172.53 | 0.00345 | 1.182403 | ACAT13;ACVRL1;ADRM1;AHR;AIM2;ALDOA;ANG;ANGPT1;ANGPTL4;ANGPTL4;ZANB1;APC;AQP11;ARL2;                           |
| turquoise MF | GO:0004693 | cyclin-dependent protein kinase activity    | 17735 | 32   | 3682 | 14  | 6.8    | 0.00349 | 2.058824 | CND3;CDK1;CDK11A;CDK11B;CDK17;CDK18;CDK2;CDK5R1;CDK7;CDK8;CDK9;CDK11;CDK12;CK                                 |
| turquoise BP | GO:0016050 | vesicle organization                        | 17735 | 103  | 3682 | 35  | 22.7   | 0.0035  | 1.54185  | ABCA1;ANXA1;ARFGAP1;BET1;BLOC1S2;COPE;COPZ1;DLG4;DTNBP1;EEA1;EP515;FBXO5;FCHO1;FCHO2;FNB                      |
| turquoise BP | GO:0016579 | protein deubiquitination                    | 17735 | 64   | 3682 | 24  | 14.1   | 0.00353 | 1.702128 | ATXN7L3;BAP1;BRCC3;DNAJB2;ENY2;ITCH;MYSM1;OTUD5;PSMD14;UCHL3;USP1;USP15;USP16;USP1                            |
| turquoise BP | GO:0043244 | regulation of protein complex disassembl... | 17735 | 64   | 3682 | 24  | 14.1   | 0.00353 | 1.702128 | APC;ARHGFE2;CAPG;CAPZA1;CAPZA2;CKAP2;EIF5A;F2RL1;GASL2;HDAC6;HRP232;KATNB1;MAP6D1;MGEF                        |
| turquoise BP | GO:0006471 | protein dephosphorylation                   | 17735 | 144  | 3682 | 46  | 31.73  | 0.00367 | 1.449732 | ADORA1;CD25C;CDKN3;CTDNEP1;CTDSP1;DAPP1;DUSP11;DUSP19;IGBP1;MTMR6;MTMR6;MTMR6;I                               |
| turquoise CC | GO:0015934 | large ribosomal subunit                     | 17735 | 75   | 3682 | 26  | 15.6   | 0.00369 | 1.666667 | FXR2;MRPL1;MRPL13;MRPL15;MRPL22;MRPL3;MRPL32;RBM3;RPL11;RPL15;RPL17;RPL23;RPL26;RPL26L1;R                     |
| turquoise MF | GO:0003735 | structural constituent of ribosome          | 17735 | 157  | 3682 | 48  | 33.34  | 0.00373 | 1.439712 | MRPL1;MRPL13;MRPL15;MRPL18;MRPL19;MRPL22;MRPL23;MRPL32;MRPL33;MRPL37;MRPL42;MRP                               |
| turquoise BP | GO:0071840 | cellular component organization or bioge... | 17735 | 4237 | 3682 | 995 | 933.59 | 0.00377 | 1.065778 | ABCA1;ABCA5;ABCD1;ABCD3;ABI1;ABI2;ABLIM2;ABR;ACAT1;ACD;ACOT13;ACP2;ACSL4;ACSL6;ACTA6;ACT                      |
| turquoise BP | GO:0034142 | toll-like receptor 4 signaling pathway      | 17735 | 89   | 3682 | 31  | 19.61  | 0.0038  | 1.580826 | ATF1;ATF2;CDK1;CHUK;CREB1;F2RL1;IKBKJ;JUN;MAP2K2;MAP2K4;MAP3K1;MAP3K7;MAP3K8;MAP3K9;MAP                       |
| turquoise BP | GO:0006471 | protein complex biogenesis                  | 17735 | 785  | 3682 | 204 | 172.97 | 0.0039  | 1.179395 | ACAT13;ACVRL1;ADRM1;AHR;AIM2;ALDOA;ANG;ANGPT1;ANGPTL4;ANGPTL4;ZANB1;APC;AQP11;ARL2;                           |
| turquoise CC | GO:0044438 | microbody part                              | 17735 | 79   | 3682 | 27  | 16.43  | 0.00392 | 1.643335 | ABCD1;ABCD2;ABCD3;ACBD5;ACSL4;ACSL6;AGPS;ATAD1;CRAT;CROT;FAR1;FAR2;GRHRP;IDE;IMPDH2;MAP2                      |
| turquoise CC | GO:0044439 | peroxisomal part                            | 17735 | 79   | 3682 | 27  | 16.43  | 0.00392 | 1.643335 | ABCD1;ABCD2;ABCD3;ACBD5;ACSL4;ACSL6;AGPS;ATAD1;CRAT;CROT;FAR1;FAR2;GRHRP;IDE;IMPDH2;MAP2                      |
| turquoise MF | GO:0000030 | mannosyltransferase activity                | 17735 | 17   | 3682 | 9   | 3.61   | 0.00396 | 2.493075 | ALG1;ALG2;ALG3;DPM1;PIGB;PIGM;PIGZ;POMT2                                                                      |
| turquoise BP | GO:0006892 | post-Golgi vesicle-mediated transport       | 17735 | 75   | 3682 | 27  | 16.53  | 0.00398 | 1.633394 | AP1B1;AP152;ARHGFE2;ARRB1;BLZF1;CSK;DTNBP1;EXOC5;GOLGA4;GOPC;LLGL1;MON2;OSBPL5;RAB10;RAB                      |
| turquoise BP | GO:0033238 | regulation of cellular amine metabolic p... | 17735 | 75   | 3682 | 27  | 16.53  | 0.00398 | 1.633394 | AZIN1;COMT;HPRT1;LDLR;LPCAT1;NQO1;PDE1B;PSMA1;PSMA2;PSMA3;PSMA4;PSMA6;PSMA8;PSMB1;PSB                         |
| turquoise MF | GO:0008601 | protein phosphatase type 2A regulator ac... | 17735 | 20   | 3682 | 10  | 4.25   | 0.00411 | 2.352941 | ARPP19;IGBP1;PPP2R1A;PPP2R2A;PPP2R3A;PPP2R4;PPP2R5A;PPP2R5B;PPP2R5C;PPP2R5E                                   |
| turquoise BP | GO:0051289 | protein homotetramerization                 | 17735 | 51   | 3682 | 20  | 11.24  | 0.00412 | 1.779359 | ACOT13;ALDOA;CBR4;CRTC2;DECR1;DHPS;GFPT1;GLS;GNMT;HPRT1;IDE;IMPDH2;PEX14;PFKL;PPAT;RYR3;S                     |
| turquoise CC | GO:0030880 | RNA polymerase complex                      | 17735 | 102  | 3682 | 33  | 21.21  | 0.00415 | 1.55587  | CCNC;CCNH;CDK7;CDK7;ERCC2;GTF2E2;GTF2F2;GTF2H1;GTF2H4;INTS12;INTS2;INTS5;INTS6;INTS8;MNA                      |
| turquoise BP | GO:0072331 | signal transduction by p53 class mediato... | 17735 | 130  | 3682 | 42  | 28.64  | 0.00426 | 1.46648  | BAG6;BRCA2;CDK2;CDKN1B;DYRK1A;DYRK2;E2F7;EEF1E1;MDM2;MSH2;MUC1;NBN;PDK2;PMAIP1;PSMA1;P                        |
| turquoise BP | GO:0006521 | regulation of cellular amino acid metabo... | 17735 | 58   | 3682 | 22  | 12.78  | 0.00434 | 1.72144  | AZIN1;COMT;NQO1;PSMA1;PSMA2;PSMA3;PSMA4;PSMA6;PSMA8;PSMB1;PSMB3;PSMC1;PSMC2;PSMC3;P                           |
| turquoise MF | GO:0005525 | GTP binding                                 | 17735 | 366  | 3682 | 99  | 77.73  | 0.00436 | 1.27364  | ADSSL1;AGAP2;AGAP3;AK3;ARF4;ARHGAP5;ARL13B;ARL15;ARL2;ARL4A;ARL5A;ARL5B;ARL8B;ATL2;DNAUC2                     |
| turquoise CC | GO:0000932 | cytoplasmic mRNA processing body            | 17735 | 51   | 3682 | 19  | 10.61  | 0.00506 | 1.790763 | APOBEC3D;BTBD1;CARHSP1;CNOT3;CNOT7;DCP1A;DCP2;EIF4E;LIN28A;MOV10;PAN3;PNRNC2;PSMA2;PSMA                       |
| turquoise CC | GO:0005819 | spindle                                     | 17735 | 232  | 3682 | 65  | 48.25  | 0.00511 | 1.34715  | AKT1;ARHGFE2;ARL8B;ASPM;AURKC;CBX3;CDC14A;CDC27;CDK1;CENPE;CEP170;CEP19;CEP250;CEP350;CEP                     |
| turquoise CC | GO:0005689 | U12-type spliceosomal complex               | 17735 | 24   | 3682 | 11  | 4.99   | 0.00517 | 2.204409 | PHF5A;RNPC3;SF3B1;SF3B4;SNRNP35;SNRNP48;SNRNP80;SNRNP82;SNRNP87;SNRNP90;SNRNP92;SNRNP93                       |
| turquoise CC | GO:0035770 | ribonucleoprotein granule                   | 17735 | 88   | 3682 | 29  | 18.3   | 0.00518 | 1.584699 | APOBEC3D;BTBD1;CARHSP1;CNOT3;CNOT7;DCP1A;DCP2;DDX3X;EIF4E;FMR1;LIN28A;MBNL1;MOV10;PAN3                        |
| turquoise CC | GO:0005777 | peroxisome                                  | 17735 | 123  | 3682 | 38  | 25.58  | 0.00533 | 1.485536 | ABCD1;ABCD2;ABCD3;ACBD5;ACSL4;ACSL6;AGPS;ATAD1;CRAT;CROT;ECH1;FAR1;FAR2;GRHRP;HMGC1;HSD                       |
| turquoise CC | GO:0042579 | microbody                                   | 17735 | 123  | 3682 | 38  | 25.58  | 0.00533 | 1.485536 | ABCD1;ABCD2;ABCD3;ACBD5;ACSL4;ACSL6;AGPS;ATAD1;CRAT;CROT;ECH1;FAR1;FAR2;GRHRP;HMGC1;HSD                       |
| turquoise MF | GO:0004559 | alpha-mannosidase activity                  | 17735 | 12   | 3682 | 7   | 2.55   | 0.00555 | 2.745098 | EDEM3;MAN1A1;MAN1A2;MAN2A1;MAN2B1;MAN2C1;MANEA                                                                |
| turquoise MF | GO:0016667 | oxidoreductase activity, acting on a sul... | 17735 | 54   | 3682 | 20  | 11.47  | 0.00564 | 1.743679 | CHCHD4;COL1;DNAJC10;ERO1L;ERO1LB;GLRX;GLRX2;GLRX3;IFI30;P4HB;PRDX3;SH3BGR3;STAB1;SUOX;TMX                     |
| turquoise MF | GO:0019899 | enzyme binding                              | 17735 | 1084 | 3682 | 264 | 230.21 | 0.00565 | 1.146779 | ABCA1;ABD1;ABI2;ACAT1;ACD;ACSL6;ACVRL1;ADAM10;ADRM1;AKAP11;AKAP5;AKAP7;AKAP8L;AKT1;APC;                       |
| turquoise MF | GO:0003677 | DNA binding                                 | 17735 | 2332 | 3682 | 542 | 495.25 | 0.00575 | 1.094397 | AB2;ACD;AEBP1;AEBP2;AHR;AIM2;AKAP8L;ANG;APEX1;APEX2;APTX;ARID2;ARID4A;ARID4B;ARID5A;ARID5E                    |
| turquoise CC | GO:0035097 | histone methyltransferase complex           | 17735 | 59   | 3682 | 21  | 12.27  | 0.0061  | 1.711491 | AEBP2;CXXC1;DPY30;E2F6;EED;HDAC9;INO80C;KAT8;MEN1;PELP1;PPP1CA;PPP1CB;PPP1CC;PRPF31;RN2;R                     |
| turquoise CC | GO:0016591 | DNA-directed RNA polymerase II, holoenz...  | 17735 | 89   | 3682 | 29  | 18.51  | 0.00619 | 1.566721 | CEBP2;CEBP3;CDK7;ERCC2;GTF2E2;GTF2F2;GTF2H1;GTF2H4;INTS12;INTS2;INTS5;INTS6;INTS8;MNA                         |
| turquoise MF | GO:0017136 | NAD-dependent histone deacetylase activi... | 17735 | 15   | 3682 | 8   | 3.19   | 0.00622 | 2.507837 | HDAC3;HDAC5;HDAC6;HDAC7;HDAC8;HDAC9;SIRT1;SIRT2                                                               |
| turquoise MF | GO:0034979 | NAD-dependent protein deacetylase activi... | 17735 | 15   | 3682 | 8   | 3.19   | 0.00622 | 2.507837 | HDAC3;HDAC5;HDAC6;HDAC7;HDAC8;HDAC9;SIRT1;SIRT2                                                               |
| turquoise CC | GO:0005694 | chromosome                                  | 17735 | 631  | 3682 | 157 | 131.22 | 0.00651 | 1.196464 | ACD;ACTL6A;ADD3;APC;APTX;ARRB1;ATRX;AURKC;BANF1;BAZ1A;CASC5;CBX3;CDK2;CENPE;CENPK;CENPL;C                     |
| turquoise CC | GO:0000428 | DNA-directed RNA polymerase complex         | 17735 | 101  | 3682 | 32  | 21     | 0.00667 | 1.52381  | CCNC;CCNH;CDK7;CDK7;ERCC2;GTF2E2;GTF2F2;GTF2H1;GTF2H4;INTS12;INTS2;INTS5;INTS6;INTS8;MNA                      |
| turquoise CC | GO:0005029 | nuclear DNA-directed RNA polymerase comp... | 17735 | 101  | 3682 | 32  | 21     | 0.00667 | 1.52381  | CCNC;CCNH;CDK7;CDK7;ERCC2;GTF2E2;GTF2F2;GTF2H1;GTF2H4;INTS12;INTS2;INTS5;INTS6;INTS8;MNA                      |
| turquoise MF | GO:0004221 | ubiquitin thiolesterase activity            | 17735 | 73   | 3682 | 25  | 15.5   | 0.0069  | 1.612903 | BAP1;BRCC3;MYSM1;PSMD14;UCHL3;UCHL5;USP1;USP12;USP14;USP15;USP16;USP19;USP21;USP25;USP3                       |
| turquoise MF | GO:0019201 | guanyl nucleotide binding                   | 17735 | 380  | 3682 | 101 | 80.7   | 0.00694 | 1.251549 | ADSSL1;AGAP2;AGAP3;AK3;ARF4;ARHGAP5;ARL13B;ARL15;ARL2;ARL4A;ARL5A;ARL5B;ARL8B;ATL2;DNAUC2                     |
| turquoise MF | GO:0032561 | guanyl ribonucleotide binding               | 17735 | 380  | 3682 | 101 | 80.7   | 0.00694 | 1.251549 | ADSSL1;AGAP2;AGAP3;AK3;ARF4;ARHGAP5;ARL13B;ARL15;ARL2;ARL4A;ARL5A;ARL5B;ARL8B;ATL2;DNAUC2                     |
| turquoise MF | GO:0008234 | cysteine-type peptidase activity            | 17735 | 147  | 3682 | 44  | 31.22  | 0.00805 | 1.409353 | ATG4A;ATG4B;ATG4C;BAP1;BRCC3;CAPN14;CAPN7;CARD17;CASP3;CASP8;CTSH;CTS2;CTSS;CTSW;MALT1;N                      |
| turquoise CC | GO:0032391 | photoreceptor connecting cilium             | 17735 | 22   | 3682 | 10  | 4.58   | 0.00814 | 2.183406 | CEP290;CETN3;FAM161A;IFT122;IFT140;IFT57;IFT88;KIF3A;TOPORS                                                   |
| turquoise CC | GO:0005743 | mitochondrial inner membrane                | 17735 | 347  | 3682 | 91  | 72.16  | 0.00829 | 1.261086 | ABCB10;ABC3;ACADVL;ACAT1;AIFM3;APEX2;ATAD3A;ATP5C1;ATP5E;ATP5F1;ATP5I;ATP5L;ATP5P;C14orf12                    |
| turquoise MF | GO:0016088 | G-protein coupled nucleotide receptor ac... | 17735 | 25   | 3682 | 11  | 5.31   | 0.00884 | 2.071563 | GPR15;GPR17;GPR14;GPR34;LPAR6;P2RY10;P2RY11;P2RY12;P2RY13;P2RY14;SUCNR1                                       |
| turquoise MF | GO:0045028 | G-protein coupled purinergic nucleotide ... | 17735 | 25   | 3682 | 11  | 5.31   | 0.00884 | 2.071563 | GPR15;GPR17;GPR14;GPR34;LPAR6;P2RY10;P2RY11;P2RY12;P2RY13;P2RY14;SUCNR1                                       |
| turquoise CC | GO:0030684 | preribosome                                 | 17735 | 16   | 3682 | 8   | 3.33   | 0.00892 | 2.402402 | CASP8;PES1;PIN4;RPS7;RRP1;UTP11L;UTP14C;WDR36                                                                 |
| turquoise MF | GO:0004702 | receptor signaling protein serine/threon... | 17735 | 49   | 3682 | 18  | 10.41  | 0.00925 | 1.729107 | ACVRL1;KIAA1804;MAP3K11;MAP3K13;MAP3K14;MAP3K2;MAP3K7;MAP3K8;MAP4K1;M                                         |

|           |    |            |                                             |       |       |      |         |         |          |                                                                                        |                                                                                                   |
|-----------|----|------------|---------------------------------------------|-------|-------|------|---------|---------|----------|----------------------------------------------------------------------------------------|---------------------------------------------------------------------------------------------------|
| turquoise | CC | GO:0005793 | endoplasmic reticulum-Golgi intermediate... | 17735 | 61    | 3682 | 21      | 12.69   | 0.00934  | 1.654846                                                                               | BCAP31;ERIC2;LMAN1;LMAN2;MAN1A1;NUCB2;P4HB;RAB2A;RAB37;SCYL1;SERPINH1;SLC35C2;STK17B;ST           |
| turquoise | CC | GO:0034708 | methyltransferase complex                   | 17735 | 61    | 3682 | 21      | 12.69   | 0.00934  | 1.654846                                                                               | AEBP2;CXXC1;DPY30;E2F6;EED;HDAC9;INO80C;KAT8;MEN1;PEL1;PPP1CA;PPP1CB;PPP1CC;PRPF31;RNF2;R         |
| turquoise | CC | GO:0005575 | cellular_component                          | 17735 | 16733 | 3682 | 3479.84 | 0.00941 | 1.001195 | AAAS;AACs;AAMP;AAAT;AASDHPPT;ABCA1;ABCA10;ABCA3;ABCA5;ABCA7;ABCB10;ABCB6;ABCC2;ABCD1;A |                                                                                                   |
| turquoise | CC | GO:0031901 | early endosome membrane                     | 17735 | 84    | 3682 | 27      | 17.47   | 0.00982  | 1.545507                                                                               | APPL1;B2M;CLIP3;EEA1;EPS15;FGD2;HGS;HLA-A;HPS6;HLA-B;LGM1;MARCH1;MTMR2;PIKIFV;RAB14;RAB5A;SH3C    |
| turquoise | MF | GO:0015923 | mannosidase activity                        | 17735 | 13    | 3682 | 7       | 2.76    | 0.00984  | 2.536232                                                                               | EDEM3;HDAC1;MAN1A1;MAN1A2;MAN2A1;MAN2B1;MAN2C1;MANEA                                              |
| turquoise | MF | GO:0032129 | histone deacetylase activity (H3-K9 spec... | 17735 | 13    | 3682 | 7       | 2.76    | 0.00984  | 2.536232                                                                               | HDAC3;HDAC5;HDAC6;HDAC7;HDAC8;HDAC9;SIRT1                                                         |
| turquoise | MF | GO:0046969 | NAD-dependent histone deacetylase activi... | 17735 | 13    | 3682 | 7       | 2.76    | 0.00984  | 2.536232                                                                               | HDAC3;HDAC5;HDAC6;HDAC7;HDAC8;HDAC9;SIRT1                                                         |
| turquoise | CC | GO:0044455 | mitochondrial membrane part                 | 17735 | 148   | 3682 | 43      | 30.78   | 0.01048  | 1.397011                                                                               | ABCB10;ABCBC6;ATP5C1;ATP5E;ATP5F1;ATP5I;ATP5L;ATP5O;C14orf2;CCDC90A;COX7A2;COX7A2L;COX7B;DN       |
| turquoise | MF | GO:0003684 | damaged DNA binding                         | 17735 | 46    | 3682 | 17      | 9.77    | 0.01054  | 1.74002                                                                                | APEX1;APTX;DDB2;HMGB1;HMGB2;MSH2;NBN;POLI;POLK;POLQ;RAD23A;RBBP8;REV1;RUVBL2;TDG;TP63;X           |
| turquoise | CC | GO:0031227 | intrinsic to endoplasmic reticulum membr... | 17735 | 112   | 3682 | 34      | 23.29   | 0.01075  | 1.459854                                                                               | ASPH;BCAP31;BNIP1;CLN3;DERL1;DHRS9;DOLPP1;ELOVL4;ERN1;EXTL2;FITM1;FMO5;HLA-A;HLA-DBP1;HLA-        |
| turquoise | CC | GO:0030532 | small nuclear ribonucleoprotein complex     | 17735 | 33    | 3682 | 13      | 6.86    | 0.01133  | 1.895044                                                                               | CD2BP2;LSM11;LSM6;PHF5A;PRPF31;PRPF6;SF3A2;SLU7;SNRPB;SNRPB2;SNRPD1;SNRPE;SNRPG                   |
| turquoise | CC | GO:0005769 | early endosome                              | 17735 | 190   | 3682 | 53      | 39.51   | 0.01161  | 1.341433                                                                               | AP1AR;APPL1;ATP11B;B2M;CHMP1A;CLIP3;CLN3;DERL1;EEA1;EPS15;FAM109B;FGD2;HGS;HLA-A;HPS6;KCN         |
| turquoise | MF | GO:0016887 | ATPase activity                             | 17735 | 353   | 3682 | 93      | 74.97   | 0.01184  | 1.240496                                                                               | ABCA1;ABCA10;ABCA3;ABCA5;ABCA7;ABCB10;ABCB6;ABCC2;ABCD1;ABCD2;ABCD3;ABCE1;ABCF3;ASNA1;A           |
| turquoise | CC | GO:0000123 | histone acetyltransferase complex           | 17735 | 74    | 3682 | 24      | 15.39   | 0.01279  | 1.559454                                                                               | ACTL6A;ATXN7L3;DMAP1;DR1;ENY2;EPC2;ING3;KAT2B;KAT8;MAP3K7;MBIP;MSL2;MSL3;PHF17;RUVBL2;TA          |
| turquoise | MF | GO:0051082 | unfolded protein binding                    | 17735 | 127   | 3682 | 38      | 26.97   | 0.01316  | 1.408973                                                                               | CCT2;CCT6B;CDC37;CHAF1A;CHAF1B;CLN3;DNAJ1;DNAJB14;DNAJB2;DNAJB4;DNAJB9;DNAJC10;DNAJC2;I           |
| turquoise | MF | GO:0003674 | molecular_function                          | 17735 | 15097 | 3682 | 3210    | 3206.18 | 0.01357  | 1.001191                                                                               | AAAS;AACs;AAMP;AAAT;AASDHPPT;ABCA1;ABCA10;ABCA3;ABCA5;ABCA7;ABCB10;ABCB6;ABCC2;ABCD1;A            |
| turquoise | CC | GO:0044450 | microtubule organizing center part          | 17735 | 94    | 3682 | 29      | 19.55   | 0.01396  | 1.483376                                                                               | BLOC1C5;CCDC92;CCP110;CEP135;CEP170;CEP19;CEP250;CEP290;CTTN3;CNTROB;FOPNL;IFT20;IFT88;KATN       |
| turquoise | MF | GO:0042578 | phosphoric ester hydrolase activity         | 17735 | 351   | 3682 | 92      | 74.54   | 0.01404  | 1.234237                                                                               | ACP2;ACPL2;ADORA1;APEX1;APTX;CDC14A;CDC25C;CDKN3;CNP;CTDNEP1;CTDSP1;CTDSP2;CYCS;DAPP1;DI          |
| turquoise | CC | GO:0005675 | holo TFIIH complex                          | 17735 | 11    | 3682 | 6       | 2.29    | 0.01412  | 2.620087                                                                               | CENH;CDK7;ERCC2;GTF2H1;GTF2H4;MNAT1                                                               |
| turquoise | CC | GO:0005779 | integral to peroxisomal membrane            | 17735 | 14    | 3682 | 7       | 2.91    | 0.01437  | 2.405498                                                                               | ABCD1;PEX11A;PEX11G;PEX12;PEX13;PEX2;PEX3                                                         |
| turquoise | CC | GO:0031231 | intrinsic to peroxisomal membrane           | 17735 | 14    | 3682 | 7       | 2.91    | 0.01437  | 2.405498                                                                               | ABCD1;PEX11A;PEX11G;PEX12;PEX13;PEX2;PEX3                                                         |
| turquoise | CC | GO:0000313 | organellar ribosome                         | 17735 | 52    | 3682 | 18      | 10.81   | 0.01454  | 1.665125                                                                               | MRPL13;MRPL18;MRPL28;MRPL32;MRPL37;MRPL39;MRPL40;MRPL42;MRPL47;MRPL48;MRPS17;M                    |
| turquoise | CC | GO:0005761 | mitochondrial ribosome                      | 17735 | 52    | 3682 | 18      | 10.81   | 0.01454  | 1.665125                                                                               | MRPL13;MRPL18;MRPL28;MRPL32;MRPL37;MRPL39;MRPL40;MRPL42;MRPL47;MRPL48;MRPS17;M                    |
| turquoise | CC | GO:0022625 | cytosolic large ribosomal subunit           | 17735 | 52    | 3682 | 18      | 10.81   | 0.01454  | 1.665125                                                                               | FXR2;RPL11;RPL15;RPL17;RPL23;RPL26;RPL27;RPL30;RPL31;RPL34;RPL35;RPL36A;RPL39;RPL41;RPL           |
| turquoise | MF | GO:0016538 | cyclin-dependent protein kinase regulato... | 17735 | 20    | 3682 | 9       | 4.25    | 0.01475  | 2.117647                                                                               | CASP3;CCNE2;CCNY;CDKN1C;CDKN2C;CKS1B;CKS2;KAT2B                                                   |
| turquoise | CC | GO:0071013 | catalytic step 2 spliceosome                | 17735 | 79    | 3682 | 25      | 16.43   | 0.0155   | 1.521607                                                                               | CDCA0;DDX41;DGCRI4;FRG1;LSM3;PLRG1;PPWD1;PRPF4B;PRPF6;RALY;SART1;SF3A1;SF3A2;SF3B1;SK             |
| turquoise | CC | GO:0005765 | lysosomal membrane                          | 17735 | 139   | 3682 | 40      | 28.91   | 0.01551  | 1.383604                                                                               | ABCA5;ACP2;AP1B1;AP1S2;ARL8B;ARRB1;CCZ1;CD164;CD63;CLCN7;CLN3;CLN5;CTNS;CYBAS3;DIRC2;DRAM         |
| turquoise | MF | GO:0035586 | purinergic receptor activity                | 17735 | 37    | 3682 | 14      | 7.86    | 0.01556  | 1.78117                                                                                | ADORA1;DLG4;GPR15;GPR17;GPR174;GPR34;LPAR6;P2RX4;P2RY10;P2RY11;P2RY12;P2RY13;P2RY14;SUCN          |
| turquoise | MF | GO:0031078 | histone deacetylase activity (H3-K14 spe... | 17735 | 11    | 3682 | 6       | 2.34    | 0.01565  | 2.564103                                                                               | HDAC3;HDAC5;HDAC6;HDAC7;HDAC8;HDAC9                                                               |
| turquoise | MF | GO:0032041 | NAD-dependent histone deacetylase activi... | 17735 | 11    | 3682 | 6       | 2.34    | 0.01565  | 2.564103                                                                               | HDAC3;HDAC5;HDAC6;HDAC7;HDAC8;HDAC9                                                               |
| turquoise | MF | GO:0046970 | NAD-dependent histone deacetylase activi... | 17735 | 11    | 3682 | 6       | 2.34    | 0.01565  | 2.564103                                                                               | HDAC3;HDAC5;HDAC6;HDAC7;HDAC8;HDAC9                                                               |
| turquoise | MF | GO:0004675 | transmembrane receptor protein serine/th... | 17735 | 17    | 3682 | 8       | 3.61    | 0.01566  | 2.216066                                                                               | ACVR1C;ACVR2A;ACVR1L1;BMPR1A;BMPR2;ENG;TGFBF1;TGFBF2                                              |
| turquoise | MF | GO:0005024 | transforming growth factor beta-activate... | 17735 | 17    | 3682 | 8       | 3.61    | 0.01566  | 2.216066                                                                               | ACVR1C;ACVR2A;ACVR1L1;BMPR1A;BMPR2;ENG;TGFBF1;TGFBF2                                              |
| turquoise | MF | GO:0015295 | solute:hydrogen symporter activity          | 17735 | 14    | 3682 | 7       | 2.97    | 0.01611  | 2.356902                                                                               | SLC17A5;SLC2A9;SLC35A1;SLC35A3;SLC35A4;SLC35A5;SLC4A11                                            |
| turquoise | MF | GO:0019887 | protein kinase regulator activity           | 17735 | 113   | 3682 | 34      | 24      | 0.01678  | 1.416667                                                                               | ABI1;APC;CAB39;CASP3;CCNE2;CCNY;CDK5R1;CDKN1B;CDKN1C;CDKN2C;CKS1B;CKS2;CSNK2B;CXCL10;DUSF         |
| turquoise | MF | GO:0019207 | kinase regulator activity                   | 17735 | 133   | 3682 | 39      | 28.25   | 0.01698  | 1.380531                                                                               | ABI1;APC;CAB39;CASP3;CCNE2;CCNY;CDK5R1;CDKN1B;CDKN1C;CDKN2C;CKS1B;CKS2;CSNK2B;CXCL10;DUSF         |
| turquoise | CC | GO:0032592 | integral to mitochondrial membrane          | 17735 | 31    | 3682 | 12      | 6.45    | 0.01713  | 1.860465                                                                               | ABCB10;ABCBC6;CCDC90A;DMPK;L2HGDH;MFF;RHOT1;SLC24A6;TIMM17A;TIMM23;TMEM70;TOMMM4                  |
| turquoise | CC | GO:0031965 | nuclear membrane                            | 17735 | 194   | 3682 | 53      | 40.34   | 0.01746  | 1.313832                                                                               | AAAS;AKIRIN1;APEH;ARFGAP1;ATP11B;BRIP1;CAPG;CBX3;CEP70;CEPT1;CERS5;CST3;CTDNEP1;DMPK;DTX2;I       |
| turquoise | CC | GO:0005635 | nuclear envelope                            | 17735 | 314   | 3682 | 81      | 65.3    | 0.01822  | 1.240429                                                                               | AAAS;AGPAT5;AKIRIN1;ANKLE1;APEH;ARFGAP1;ATP11B;BRIP1;BNIP1;BNIP2;BNIP3L;BRIP1;CAPG;CBX3;CEP70;CEP |
| turquoise | CC | GO:0032153 | cell division site                          | 17735 | 42    | 3682 | 15      | 8.73    | 0.01827  | 1.718213                                                                               | ANLN;ECT2;MEN1;NDE1;PITPNM1;PKN1;PKN2;PLCD3;PLK4;PPP1CC;PSTPIP1;RALA;RDX;SEPT7;SPIRE2             |
| turquoise | CC | GO:0032155 | cell division site part                     | 17735 | 42    | 3682 | 15      | 8.73    | 0.01827  | 1.718213                                                                               | ANLN;ECT2;MEN1;NDE1;PITPNM1;PKN1;PKN2;PLCD3;PLK4;PPP1CC;PSTPIP1;RALA;RDX;SEPT7;SPIRE2             |
| turquoise | CC | GO:0030496 | midbody                                     | 17735 | 88    | 3682 | 27      | 18.3    | 0.01856  | 1.47541                                                                                | ARL8B;ASPM;AURKC;CDK1;CEP44;CLIC4;DDX11;ECT2;ERH;GDI1;GNAI1;KATNB1;KEAP1;KIF23;KLHL9;MITD1;I      |
| turquoise | MF | GO:0016758 | transferase activity, transferring hexos... | 17735 | 183   | 3682 | 51      | 38.86   | 0.01946  | 1.312403                                                                               | AGL;ALG1;ALG10;ALG10B;ALG11;ALG13;ALG2;ALG3;ALG6;B3GALNT1;B3GALT2;B3GNT1;B3GNT2;B3GNT5;B          |
| turquoise | MF | GO:0016788 | hydrolase activity, acting on ester bond... | 17735 | 730   | 3682 | 178     | 155.03  | 0.01973  | 1.148165                                                                               | ABHD12;ABHD3;ACOT13;ACOT7;ACP2;ACPL2;ALG3;ADORA1;ANG;ANTP1;APEX2;APLF;APTX;ARSA;ARSK;AST          |
| turquoise | CC | GO:0005932 | microtubule basal body                      | 17735 | 65    | 3682 | 21      | 13.52   | 0.01992  | 1.553254                                                                               | CEP250;CEP290;CTTN3;DYNC2L1;FAM161A;FOPNL;IFT122;IFT140;IFT20;IFT57;IFT80;IFT88;MKS1;PKD2;POC     |
| turquoise | CC | GO:0005774 | vacuolar membrane                           | 17735 | 183   | 3682 | 50      | 38.06   | 0.02044  | 1.313715                                                                               | ABCA5;ABCBC6;ACP2;AKTIP;AP1B1;AP1S2;ARL8B;ARRB1;ATG9A;ATP6A1;ATP6V1G1;CCZ1;CD164;CD63;CLC         |
| turquoise | MF | GO:0004298 | threonine-type endopeptidase activity       | 17735 | 21    | 3682 | 9       | 4.46    | 0.02104  | 2.017937                                                                               | PRSS50;PSMA2;PSMA3;PSMA4;PSMA6;PSMA8;PSMB1;PSMB3                                                  |
| turquoise | MF | GO:0070003 | threonine-type peptidase activity           | 17735 | 21    | 3682 | 9       | 4.46    | 0.02104  | 2.017937                                                                               | PRSS50;PSMA1;PSMA2;PSMA3;PSMA4;PSMA6;PSMA8;PSMB1;PSMB3                                            |
| turquoise | CC | GO:0032154 | cleavage furrow                             | 17735 | 39    | 3682 | 14      | 8.11    | 0.0212   | 1.726264                                                                               | ECT2;MEN1;NDE1;PITPNM1;PKN1;PKN2;PLCD3;PLK4;PPP1CC;PSTPIP1;RALA;RDX;SEPT7;SPIRE2                  |
| turquoise | CC | GO:0000777 | condensed chromosome kinetochore            | 17735 | 81    | 3682 | 25      | 16.84   | 0.02126  | 1.484561                                                                               | CASC5;CENPE;CENPK;CENPW;CSNK1A1;DYNLT3;ITGB3BP;MAD2L1;MLF1IP;NDE1;NSL1;NUDCD2;NUF2;NUP            |
| turquoise | CC | GO:0000779 | condensed chromosome, centromeric region    | 17735 | 85    | 3682 | 26      | 17.68   | 0.02141  | 1.470588                                                                               | CASC5;CENPE;CENPK;CENPW;CSNK1A1;DYNLT3;ITGB3BP;MAD2L1;MLF1IP;NDE1;NSL1;NUDCD2;NUF2                |
| turquoise | CC | GO:0044447 | axoneme part                                | 17735 | 32    | 3682 | 12      | 6.65    | 0.02234  | 1.804511                                                                               | ARFGFE2;CTSH;DNAH6;DNAI2;DYNC2L1;HSPB11;IFT20;IFT52;IFT74;IFT81;IFT88;RSPH4A                      |
| turquoise | MF | GO:0004721 | phosphoprotein phosphatase activity         | 17735 | 168   | 3682 | 47      | 35.68   | 0.02254  | 1.317265                                                                               | CDCA14A;CDC25C;CDKN3;CTDNEP1;CTDSP1;CTDSP2;CYCS;DAPP1;DLG1;DUSP11;DUSP19;MTMR2;MTMR6;A            |
| turquoise | MF | GO:0070412 | R-SMAD binding                              | 17735 | 18    | 3682 | 8       | 3.82    | 0.02304  | 2.094241                                                                               | FOXH1;JUN;MEN1;PAX6;RANBP3;SMAD2;SMAD4;TRIM33                                                     |
| turquoise | CC | GO:0032039 | integrator complex                          | 17735 | 12    | 3682 | 6       | 2.5     | 0.02333  | 2.4                                                                                    | INTS12;INTS2;INTS5;INTS6;INTS8;SHFM1                                                              |
| turquoise | CC | GO:0005741 | mitochondrial outer membrane                | 17735 | 118   | 3682 | 34      | 24.54   | 0.02373  | 1.385493                                                                               | ABCBC6;ABCCL6;AGPAT5;BMF;BNIP3L;CASP8;CISD1;CISD2;CNP;COASY;DDX3X;DMPK;GK;GPAM;GPAT2;             |
| turquoise | CC | GO:0005795 | Golgi stack                                 | 17735 | 110   | 3682 | 32      | 22.88   | 0.02419  | 1.398601                                                                               | APH1A;BAGALT3;B4GALT6;BET1;CHPF;CHPF2;CHSY1;CLIP3;COG3;CSGALNACT1;CSGALNACT2;FUT4;GA              |
| turquoise | MF | GO:0016854 | racemase and epimerase activity             | 17735 | 12    | 3682 | 6       | 2.55    | 0.02576  | 2.352941                                                                               | DHRS9;GALE;GLCE;MCEE;RENBP;RPE                                                                    |
| turquoise | MF | GO:0034739 | histone deacetylase activity (H4-K16 spe... | 17735 | 12    | 3682 | 6       | 2.55    | 0.02576  | 2.352941                                                                               | HDAC3;HDAC5;HDAC6;HDAC7;HDAC8;HDAC9                                                               |
| turquoise | MF | GO:0097372 | NAD-dependent histone deacetylase activi... | 17735 | 12    | 3682 | 6       | 2.55    | 0.02576  | 2.352941                                                                               | HDAC3;HDAC5;HDAC6;HDAC7;HDAC8;HDAC9                                                               |
| turquoise | MF | GO:0001614 | purinergic nucleotide receptor activity     | 17735 | 32    | 3682 | 12      | 6.8     | 0.02609  | 1.764706                                                                               | GPR15;GPR17;GPR174;GPR34;LPAR6;P2RX4;P2RY10;P2RY11;P2RY12;P2RY13;P2RY14;SUCN1                     |
| turquoise | MF | GO:0016502 | nucleotide receptor activity                | 17735 | 32    | 3682 | 12      | 6.8     | 0.02609  | 1.764706                                                                               | GPR15;GPR17;GPR174;GPR34;LPAR6;P2RX4;P2RY10;P2RY11;P2RY12;P2RY13;P2RY14;SUCN1                     |
| turquoise | MF | GO:0008022 | protein C-terminus binding                  | 17735 | 158   | 3682 | 44      | 33.55   | 0.02866  | 1.311475                                                                               | AKAP7;ARL6IP5;BAIAP2;BLOC1S2;CDK7;CEP120;CEP135;CEP250;COIL;CORO1A;CSK;CTBP1;DGK2;DLG1;DLG4       |
| turquoise | CC | GO:0000314 | organellar small ribosomal subunit          | 17735 | 19    | 3682 | 8       | 3.95    | 0.02896  | 2.025316                                                                               | MRPL42;MRPS17;MRPS18B;MRPS18C;MRPS22;MRPS28;MRPS31;MRPS33                                         |
| turquoise | CC | GO:0005763 | mitochondrial small ribosomal subunit       | 17735 | 19    | 3682 | 8       | 3.95    | 0.02896  | 2.025316                                                                               | MRPL42;MRPS17;MRPS18B;MRPS18C;MRPS22;MRPS28;MRPS31;MRPS33                                         |
| turquoise | CC | GO:0005720 | nuclear heterochromatin                     | 17735 | 26    | 3682 | 10      | 5.41    | 0.02984  | 1.848429                                                                               | ATRX;CBX3;EED;PSIP1;RING1;RNF2;SIRT1;SU39H2;SUZ12;TRIM28                                          |
| turquoise | CC | GO:0070461 | SAGA-type complex                           | 17735 | 26    | 3682 | 10      | 5.41    | 0.02984  | 1.848429                                                                               | ATXN7L3;ENY2;KAT2B;TADA1;TAF12;TAF2;TAF5;TAF7;TAF9                                                |
| turquoise | MF | GO:0004520 | endodeoxyribonuclease activity              | 17735 | 29    | 3682 | 11      | 6.16    | 0.02984  | 1.785714                                                                               | APEX1;APLF;DNA2;DNASE1L1;DNASE2;ENDOV;RAD51C;RBBP8;TATDN1;TATDN3;ZRNAN3                           |
| turquoise | MF | GO:0008094 | DNA-dependent ATPase activity               | 17735 | 70    | 3682 | 22      | 14.87   | 0.02995  | 1.479489                                                                               | BRIP1;CCNH;CDK7;CHD1;DDX11;DDX3X;DNA2;ERCC2;ADORA1;GTF2H4;IGHMBP2;MNAT1;MSH2;NBN;POLQ;            |

|              |            |                                             |       |       |      |     |        |          |          |                                                                                               |
|--------------|------------|---------------------------------------------|-------|-------|------|-----|--------|----------|----------|-----------------------------------------------------------------------------------------------|
| turquoise MF | GO:0003712 | transcription cofactor activity             | 17735 | 475   | 3682 | 118 | 100.88 | 0.0307   | 1.169707 | ACTL6A;AEBP1;AEBP2;APEX1;ARID5B;ATF2;ATXN7L3;BIRC2;CASP8AP2;CBFB;CDK7;CNOT2;COP52;COP55;CR    |
| turquoise CC | GO:0012507 | ER to Golgi transport vesicle membrane      | 17735 | 37    | 3682 | 13  | 7.69   | 0.03093  | 1.690507 | B2M;HLA-A;HLA-DPB1;HLA-DRA;LMAN1;SAR1B;SCAP;SEC13;SEC23A;SEC24A;SREBF1;TMED7;VMA21            |
| turquoise CC | GO:0031519 | PcG protein complex                         | 17735 | 37    | 3682 | 13  | 7.69   | 0.03093  | 1.690507 | AEBP2;BAP1;BMI1;CSNK2B;EED;PCGF5;PCGF6;PHC3;RING1;RN2;RYBP;SIRT1;SUZ12                        |
| turquoise CC | GO:0000792 | heterochromatin                             | 17735 | 60    | 3682 | 19  | 12.48  | 0.03186  | 1.522436 | ATRX;CBX3;DAXX;EED;HELLS;LRWD1;ORC2;PSIP1;RING1;RNF2;RNF40;RRP8;SIRT1;SMARCD1;SU39H1;SU       |
| turquoise MF | GO:0004407 | histone deacetylase activity                | 17735 | 19    | 3682 | 8   | 4.04   | 0.03255  | 1.980198 | HDAC3;HDAC5;HDAC6;HDAC7;HDAC8;HDAC9;SIRT1;SIRT2                                               |
| turquoise MF | GO:0004709 | MAP kinase kinase activity                  | 17735 | 19    | 3682 | 8   | 4.04   | 0.03255  | 1.980198 | KIAA1804;MAP3K1;MAP3K11;MAP3K13;MAP3K18;MAP3K21;MAP3K7;MAP3K8                                 |
| turquoise CC | GO:0005801 | cis-Golgi network                           | 17735 | 30    | 3682 | 11  | 6.24   | 0.03332  | 1.762821 | BET1;COG3;FAM134B;MAP6D1;SCFD1;SCYL1;SLC35C2;TMED10;TMED5;TRAPP1;TRAPPCE                      |
| turquoise MF | GO:0019210 | kinase inhibitor activity                   | 17735 | 48    | 3682 | 16  | 10.19  | 0.03513  | 1.570167 | CASP3;CDKN1B;CDKN1C;CDKN2C;DUSP19;FGFR1OP;GMFB;IBTK;KAT2B;LRP6;MAPK8IP1;MBIP;PKIA;PKIB;PR     |
| turquoise MF | GO:0052745 | inositol phosphate phosphatase activity     | 17735 | 16    | 3682 | 7   | 3.4    | 0.03611  | 2.058824 | IMPAD1;IMPAD2;INPP5D;INPP5K;MINPP1;PTEN;SYNJ1                                                 |
| turquoise MF | GO:0070063 | RNA polymerase binding                      | 17735 | 16    | 3682 | 7   | 3.4    | 0.03611  | 2.058824 | C14orf166;CDC73;KIAA1967;NEDD4;SMYD2;WDHD1;ZNF326                                             |
| turquoise MF | GO:0005057 | receptor signaling protein activity         | 17735 | 103   | 3682 | 30  | 21.87  | 0.03611  | 1.371742 | ACVR2A;ACVRL1;ARAF;BAG4;CDKN1B;DAXX;ENG;FLRT1;IFITM1;KIAA1804;MAP3K1;MAP3K11;MAP3K13;MA       |
| turquoise MF | GO:0016765 | transferase activity, transferring alkyl... | 17735 | 52    | 3682 | 17  | 11.04  | 0.03656  | 1.539855 | AGPS;CHM;CHML;COQ2;DHPS;FDF1T1;FDPS;FNTA;GGPS1;GSTM2;GSTP1;NANS;NUS1;PDS1;PGGT1B;PTAR1;       |
| turquoise MF | GO:0008047 | enzyme activator activity                   | 17735 | 404   | 3682 | 101 | 85.8   | 0.03677  | 1.177156 | ABI1;ABR;ACAP1;ACAP2;ADAP1;ADC;ADRM1;AGAP2;AGAP3;AGFG2;AIFM3;ARAP2;ARFGAP1;ARFGAP2;ARH        |
| turquoise CC | GO:0044427 | chromosomal part                            | 17735 | 538   | 3682 | 129 | 111.88 | 0.03803  | 1.153021 | ACD;ACTL6A;APC;APTX;ARRB1;ATRX;AURKC;CAASC5;CBX3;CDK2;CENPF;CENPK;CENPL;CENPW;CREB1           |
| turquoise CC | GO:0008385 | IkappaB kinase complex                      | 17735 | 10    | 3682 | 5   | 2.08   | 0.0383   | 2.403846 | CHUK;IKBKKG;MAP3K13;MAP3K7;PRDX3                                                              |
| turquoise MF | GO:0030145 | manganese ion binding                       | 17735 | 41    | 3682 | 14  | 8.71   | 0.03858  | 1.607348 | ATP2C1;CDIPT;DCP2;DYRK2;GALNT1;GALNT3;HMGCL1;IDI1;NUDT16;PAPOLA;PEPD;PEPF1;PPM1B;TDP2         |
| turquoise CC | GO:0044665 | MLL1/2 complex                              | 17735 | 27    | 3682 | 10  | 5.61   | 0.0388   | 1.782531 | E2F6;IN080C;KAT8;PELP1;PRPF31;RNF2;RUVBL2;TAF7;TAF9;WDR5                                      |
| turquoise CC | GO:0071339 | MLL1 complex                                | 17735 | 27    | 3682 | 10  | 5.61   | 0.0388   | 1.782531 | E2F6;IN080C;KAT8;PELP1;PRPF31;RNF2;RUVBL2;TAF7;TAF9;WDR5                                      |
| turquoise CC | GO:0000803 | sex chromosome                              | 17735 | 20    | 3682 | 8   | 4.16   | 0.03968  | 1.923077 | CDK2;EED;RING1;RNF2;SMARCB1;SMCHD1;SU212;UBE2A                                                |
| turquoise CC | GO:0005839 | proteasome core complex                     | 17735 | 20    | 3682 | 8   | 4.16   | 0.03968  | 1.923077 | PSMA1;PSMA2;PSMA3;PSMA4;PSMA6;PSMA8;PSMB1;PSMB3                                               |
| turquoise MF | GO:0030695 | GTPase regulator activity                   | 17735 | 436   | 3682 | 108 | 92.59  | 0.04004  | 1.166433 | ABR;ACAP1;ACAP2;ADAP1;AGAP2;AGAP3;AGFG2;ARAP2;ARFGAP1;ARFGAP2;ARFGF2;ARHGAP10;ARHGAP          |
| turquoise MF | GO:0004860 | protein kinase inhibitor activity           | 17735 | 45    | 3682 | 15  | 9.56   | 0.04057  | 1.569038 | CASP3;CDKN1B;CDKN1C;CDKN2C;DUSP19;FGFR1OP;GMFB;IBTK;KAT2B;MAPK8IP1;MBIP;PKIA;PKIB;PRKAG2;     |
| turquoise MF | GO:0005072 | transforming growth factor beta receptor... | 17735 | 10    | 3682 | 5   | 2.12   | 0.04162  | 2.358491 | CDKN1B;ENG;SMAD2;SMAD4;SMAD5                                                                  |
| turquoise MF | GO:0008641 | small protein activating enzyme activity    | 17735 | 10    | 3682 | 5   | 2.12   | 0.04162  | 2.358491 | MOC3;UBA2;UBA3;UBA5;UBA6                                                                      |
| turquoise MF | GO:0043175 | RNA polymerase core enzyme binding          | 17735 | 10    | 3682 | 5   | 2.12   | 0.04162  | 2.358491 | C14orf166;CDC73;KIAA1967;SMYD2;ZNF326                                                         |
| turquoise MF | GO:0015036 | disulfide oxidoreductase activity           | 17735 | 34    | 3682 | 12  | 7.22   | 0.04179  | 1.66205  | CHCHD4;COL1;DNAJC10;GLRX;GLR2;GLRX3;P4HB;SH3BGR3;STAB1;TMX1;TMX3;TXNL1                        |
| turquoise MF | GO:0016791 | phosphatase activity                        | 17735 | 255   | 3682 | 66  | 54.15  | 0.04221  | 1.218837 | ACP2;ACPL2;APTX;CDC14A;CDC25C;CDKN3;CTDNBP1;CTDSP1;CTDSP2;CYCS;DAPP1;DLG1;DUSP12;DUSP19;      |
| turquoise MF | GO:0050662 | coenzyme binding                            | 17735 | 179   | 3682 | 48  | 38.01  | 0.04334  | 1.262826 | ACAD10;ACAD9;ACADM;ACADS5;ACADVL;ACAT1;ACBD3;ACBD5;ACBD6;ACOT7;AGPS;AIFM3;BDH2;C1orf43;       |
| turquoise MF | GO:0005096 | GTPase activator activity                   | 17735 | 247   | 3682 | 64  | 52.46  | 0.04396  | 1.219977 | ABR;ACAP1;ACAP2;ADAP1;AGAP2;AGAP3;AGFG2;ARAP2;ARFGAP1;ARFGAP2;ARFGF2;ARHGAP10;ARHGAP11A;ARH   |
| turquoise CC | GO:0032838 | cell projection cytoplasm                   | 17735 | 66    | 3682 | 20  | 13.73  | 0.04402  | 1.456664 | ADA;CCDC103;CCDC39;DLG4;DNAH6;DNAI2;DYNC2L1;FMR1;IFT140;IFT80;IFT88;LRRC2;PQB1;RPRG;RSPH4     |
| turquoise MF | GO:0015036 | hydrolase activity                          | 17735 | 2319  | 3682 | 524 | 492.49 | 0.04415  | 1.063983 | ABR;ACAP1;ACAP2;ADAP1;AGAP2;AGAP3;AGFG2;ARAP2;ARFGAP1;ARFGAP2;ARFGF2;ARHGAP10;ARHGAP          |
| turquoise MF | GO:0033558 | protein deacetylase activity                | 17735 | 20    | 3682 | 8   | 4.25   | 0.04441  | 1.882353 | HDAC3;HDAC5;HDAC6;HDAC7;HDAC8;HDAC9;SIRT1;SIRT2                                               |
| turquoise MF | GO:0004536 | deoxyribonuclease activity                  | 17735 | 38    | 3682 | 13  | 8.07   | 0.04462  | 1.610905 | APEX1;APLF;APTX;DNA2;DNASE1L1;DNASE2;ENDOV;RAD51C;RBBP8;TATDN1;TATDN3;ABCE1;ZBANB3            |
| turquoise MF | GO:0008375 | acetylglucosaminyltransferase activity      | 17735 | 38    | 3682 | 13  | 8.07   | 0.04462  | 1.610905 | ALG13;B3GNT1;B3GNT5;EXTL2;GCNT1;GCNT2;GCNT4;LFNG;MGAT1;MGAT2;MGAT4A;PIGA;RFXN                 |
| turquoise MF | GO:0006589 | nucleoside-triphosphatase regulator acti... | 17735 | 447   | 3682 | 110 | 94.93  | 0.04535  | 1.158749 | ABR;ACAP1;ACAP2;ADAP1;AGAP2;AGAP3;AGFG2;ARAP2;ARFGAP1;ARFGAP2;ARFGF2;ARHGAP10;ARHGAP          |
| turquoise MF | GO:0051536 | iron-sulfur cluster binding                 | 17735 | 61    | 3682 | 19  | 12.95  | 0.04539  | 1.467181 | ABCE1;AIFM3;BRIP1;CISD1;CISD2;CMAHP;DDX11;DNA2;ERCC2;GLRX2;GLRX3;IREB2;ISCA1;NDUFS2;NFU1;NI   |
| turquoise MF | GO:0051540 | metal cluster binding                       | 17735 | 61    | 3682 | 19  | 12.95  | 0.04539  | 1.467181 | ABCE1;AIFM3;BRIP1;CISD1;CISD2;CMAHP;DDX11;DNA2;ERCC2;GLRX2;GLRX3;IREB2;ISCA1;NDUFS2;NFU1;NI   |
| turquoise MF | GO:0030176 | integral to endoplasmic reticulum membra... | 17735 | 95    | 3682 | 27  | 19.76  | 0.0474   | 1.366397 | ASPH;BCAP31;BNIP1;CLN3;DERL1;DHRS9;DOLPP1;ELOVL4;ERN1;FITM1;HLA-A;HLA-DPB1;HLA-DRA;INSIG1;I   |
| turquoise CC | GO:0016746 | transferase activity, transferring acyl ... | 17735 | 227   | 3682 | 59  | 48.21  | 0.04864  | 1.223812 | AANAT;ACAT1;ACAT2;AGPAT5;BRCA2;CERS5;CRAT;CROT;DLAT;ESCO1;ESCO2;GGCT;GPAM;GPAT2;HAT1;HV       |
| turquoise CC | GO:0031984 | organelle subcompartment                    | 17735 | 83    | 3682 | 24  | 17.26  | 0.04931  | 1.390498 | APH1A;B4GALT3;B4GALT6;BET1;CHPF;CHPF2;CHSY1;COG3;CSGALNACT1;CSGNALACT2;FUT4;GALNT1;GALN       |
| turquoise CC | GO:0015030 | Cajal body                                  | 17735 | 47    | 3682 | 15  | 9.77   | 0.0495   | 1.535312 | CDK1;BOGL;GEM1;GEMIN2;GEMIN3;GEMIN4;GEMIN5;GEMIN6;GEMIN7;GEMIN8;GEMIN9;GEMIN10;GEMIN11;XPO1   |
| turquoise MF | GO:0016757 | transferase activity, transferring glyco... | 17735 | 253   | 3682 | 65  | 53.73  | 0.04981  | 1.209752 | AGL1;ALG10;ALG10B;ALG11;ALG13;ALG2;ALG3;ALG6;B3GALNT1;B3GALT2;B3GALT3;B3GNT1;B3GNT2;E         |
| tan BP       | GO:0046483 | heterocycle metabolic process               | 17735 | 5361  | 111  | 56  | 35.76  | 2.20E-05 | 1.565996 | AARS1;ABCD4;ACTR5;AKIRIN2;ASNS;CARKD;CDK5RAP1;EXOSC2;EXOSC7;FANCE;GEMIN8;GPD1;GTF2IRD2;I      |
| tan BP       | GO:0006725 | cellular aromatic compound metabolic pro... | 17735 | 5371  | 111  | 56  | 35.83  | 2.40E-05 | 1.562939 | AARS1;ABCD4;ACTR5;AKIRIN2;ASNS;CARKD;CDK5RAP1;CLYBL;EXOSC2;EXOSC7;FANCE;GEMIN8;GPD1;GTF       |
| tan BP       | GO:1901360 | organic cyclic compound metabolic proces... | 17735 | 5578  | 111  | 57  | 37.21  | 3.50E-05 | 1.531846 | AARS1;ABCD4;ACTR5;AKIRIN2;ASNS;CARKD;CDK5RAP1;EXOSC2;EXOSC7;FANCE;GEMIN8;GPD1;GTF2IRD2;I      |
| tan BP       | GO:0006139 | nucleobase-containing compound metabolic... | 17735 | 5209  | 111  | 53  | 34.75  | 0.00011  | 1.52518  | AARS1;ACTR5;AKIRIN2;ASNS;CARKD;CDK5RAP1;EXOSC2;EXOSC7;FANCE;GEMIN8;GPD1;GTF2IRD2;GTF2IR       |
| tan BP       | GO:0006807 | nitrogen compound metabolic process         | 17735 | 5942  | 111  | 57  | 39.64  | 0.00027  | 1.437941 | AARS1;ABCD4;ACTR5;AKIRIN2;ASNS;BPHL;CARKD;CDK5RAP1;EXOSC2;EXOSC7;FANCE;GEMIN8;GPD1;GTF2       |
| tan BP       | GO:0090304 | nucleic acid metabolic process              | 17735 | 4431  | 111  | 46  | 29.56  | 0.00032  | 1.556157 | AARS1;ACTR5;AKIRIN2;CDK5RAP1;EXOSC2;EXOSC7;FANCE;GEMIN8;GTF2IRD2;GTF2IRD2B;HIST1H2BC;HIST     |
| tan BP       | GO:0034641 | cellular nitrogen compound metabolic pro... | 17735 | 5595  | 111  | 54  | 37.32  | 0.00042  | 1.446945 | AARS1;ACTR5;AKIRIN2;ASNS;CARKD;CDK5RAP1;EXOSC2;EXOSC7;FANCE;GEMIN8;GPD1;GTF2IRD2;GTF2IR       |
| tan BP       | GO:0006733 | oxidoreduction coenzyme metabolic proces... | 17735 | 57    | 111  | 4   | 0.38   | 0.00056  | 10.52632 | CARKD;COQ6;GPD1;LDHB                                                                          |
| tan MF       | GO:0008270 | zinc ion binding                            | 17735 | 1977  | 111  | 25  | 12.82  | 0.00065  | 1.950078 | CRIP3;GTF2IRD2;GTF2IRD2B;HKR1;PRR3;SIRT5;TCEA3;ZNF133;ZNF185;ZNF202;ZNF211;ZNF232;ZNF266;ZNF  |
| tan CC       | GO:0043231 | intracellular membrane-bounded organelle    | 17735 | 9560  | 111  | 77  | 61.06  | 0.001    | 1.261055 | ABCD4;ACTR5;AEN;AKIRIN2;AP3M2;AP4B1;ATG16L1;BPHL;C12orf65;CARKD;CDK20;CIAPIN1;CLYBL;COQ10A    |
| tan CC       | GO:0043227 | membrane-bounded organelle                  | 17735 | 9590  | 111  | 77  | 61.25  | 0.0011   | 1.257143 | ABCD4;ACTR5;AEN;AKIRIN2;AP3M2;AP4B1;ATG16L1;BPHL;C12orf65;CARKD;CDK20;CIAPIN1;CLYBL;COQ10A    |
| tan BP       | GO:0044237 | cellular metabolic process                  | 17735 | 8597  | 111  | 72  | 57.35  | 0.00133  | 1.255449 | AARS1;ABCD4;ACTR5;AKIRIN2;ALDH8A1;ASNS;ATG16L1;BPHL;CARKD;CDK5RAP1;CLYBL;COQ6;DNAJC9;DPI      |
| tan BP       | GO:0016070 | RNA metabolic process                       | 17735 | 3911  | 111  | 40  | 26.09  | 0.0015   | 1.533154 | AARS1;ACTR5;AKIRIN2;CDK5RAP1;EXOSC2;EXOSC7;GEMIN8;GTF2IRD2;GTF2IRD2B;HKR1;MEAF6;METTL3;F      |
| tan MF       | GO:0046914 | transition metal ion binding                | 17735 | 2217  | 111  | 26  | 14.37  | 0.00153  | 1.809325 | CRIP3;GTF2IRD2;GTF2IRD2B;HKR1;METTL17;PRR3;SIRT5;TCEA3;ZNF133;ZNF185;ZNF202;ZNF211;ZNF232;ZNF |
| tan MF       | GO:1901363 | heterocyclic compound binding               | 17735 | 5302  | 111  | 49  | 34.38  | 0.00164  | 1.425247 | AARS1;ABCD4;ACTR5;AEN;ASNS;C12orf65;CARKD;CDK20;COQ6;DNAH3;EXOSC2;EXOSC7;FGR;GPD1;GTF2II      |
| tan MF       | GO:0051539 | 4 iron, 4 sulfur cluster binding            | 17735 | 37    | 111  | 3   | 0.24   | 0.00175  | 12.5     | CDK5RAP1;LIAS;RSAD1                                                                           |
| tan MF       | GO:0097159 | organic cyclic compound binding             | 17735 | 5372  | 111  | 49  | 34.83  | 0.00225  | 1.406833 | AARS1;ABCD4;ACTR5;AEN;ASNS;C12orf65;CARKD;CDK20;COQ6;DNAH3;EXOSC2;EXOSC7;FGR;GPD1;GTF2II      |
| tan MF       | GO:0003676 | nucleic acid binding                        | 17735 | 3299  | 111  | 34  | 21.39  | 0.0023   | 1.589528 | AARS1;AEN;C12orf65;EXOSC2;EXOSC7;GTF2IRD2;GTF2IRD2B;HIST1H2BC;HIST1H2BF;HNAJ1;ME              |
| tan CC       | GO:0005739 | mitochondrion                               | 17735 | 1488  | 111  | 19  | 9.5    | 0.0026   | 2        | BPHL;C12orf65;CARKD;CLYBL;COQ10A;COQ6;FGR;GPD1;LDHB;LETMD1;LIAS;METTL17;PEX11B;RFBF;RSAD1;    |
| tan CC       | GO:0044424 | intracellular part                          | 17735 | 12103 | 111  | 90  | 77.3   | 0.0028   | 1.164295 | AARS1;ABCD4;ACTR5;AEN;AKIRIN2;ALDH8A1;AP3M2;AP4B1;ASNS;ATG16L1;BPHL;C12orf65;CARKD;CD302      |
| tan MF       | GO:0051287 | NAD binding                                 | 17735 | 44    | 111  | 3   | 0.29   | 0.00289  | 10.34483 | GPD1;LDHB;SIRT5                                                                               |
| tan BP       | GO:0034660 | nRNA metabolic process                      | 17735 | 285   | 111  | 7   | 1.9    | 0.00295  | 3.684211 | AARS1;CDK5RAP1;EXOSC2;EXOSC7;RBF1;RPP38;WDR77                                                 |
| tan BP       | GO:0008152 | metabolic process                           | 17735 | 9452  | 111  | 76  | 63.05  | 0.00302  | 1.205393 | AARS1;ABCD4;ACTR5;AKIRIN2;ALDH8A1;ASNS;ATG16L1;BPHL;CARKD;CDK5RAP1;CLYBL;COQ6;DNAJC9;DPI      |
| tan MF       | GO:0043169 | cation binding                              | 17735 | 4026  | 111  | 39  | 26.1   | 0.00303  | 1.494253 | AARS1;CDK5RAP1;CLYBL;CRIP3;GTF2IRD2;GTF2IRD2B;HIST1H2BC;HIST1H2BF;HNAJ1;ME                    |
| tan MF       | GO:0003677 | DNA binding                                 | 17735 | 2332  | 111  | 26  | 15.12  | 0.00316  | 1.719577 | GTF2IRD2;GTF2IRD2B;HIST1H2BC;HIST1H2BD;HIST2H2BF;HKR1;PMS2P1;POLR1C;TCEA3;ZNF133;ZNF202;ZNF   |
| tan CC       | GO:0005779 | integral to peroxisomal membrane            | 17735 | 14    | 111  | 2   | 0.09   | 0.0035   | 22.22222 | PEX11B;SLC25A17                                                                               |
| tan CC       | GO:0031231 | intrinsic to peroxisomal membrane           | 17735 | 14    | 111  | 2   | 0.09   | 0.0035   | 22.22222 | PEX11B;SLC25A17                                                                               |

|     |    |            |                                             |       |       |     |    |       |         |          |                                                                                               |
|-----|----|------------|---------------------------------------------|-------|-------|-----|----|-------|---------|----------|-----------------------------------------------------------------------------------------------|
| tan | CC | GO:0005622 | intracellular                               | 17735 | 12344 | 111 | 91 | 78.84 | 0.0035  | 1.154236 | AARSD1;ABCD4;ACTR5;AEN;AKIRIN2;ALDH8A1;AP3M2;AP4B1;ASNS;ATG16L1;BPHL;C12orf65;CARKD;CD302     |
| tan | BP | GO:0071704 | organic substance metabolic process         | 17735 | 8996  | 111 | 73 | 60.01 | 0.00361 | 1.216464 | AARSD1;ABCD4;ACTR5;AKIRIN2;ALDH8A1;ASNS;BPHL;CARKD;CDK5RAP1;COQ6;DNAJC9;DPH2;DUSP6;EXOSC      |
| tan | BP | GO:0019362 | pyridine nucleotide metabolic process       | 17735 | 47    | 111 | 3  | 0.31  | 0.00377 | 9.677419 | CARKD;GPD1;LDHB                                                                               |
| tan | BP | GO:0046496 | nicotinamide nucleotide metabolic proces... | 17735 | 47    | 111 | 3  | 0.31  | 0.00377 | 9.677419 | CARKD;GPD1;LDHB                                                                               |
| tan | MF | GO:0046872 | metal ion binding                           | 17735 | 3936  | 111 | 38 | 25.52 | 0.00377 | 1.489028 | AARSD1;CDK5RAP1;CLYBL;CRIP3;GTF2IRD2;GTF2IRD2B;HKR1;HPCAL4;ILKAP;ITGA10;LIAS;METTL17;OCM;PD   |
| tan | MF | GO:0000175 | 3'-5'-exoribonuclease activity              | 17735 | 15    | 111 | 2  | 0.1   | 0.00414 | 20       | EXOSC2;EXOSC7                                                                                 |
| tan | BP | GO:0010467 | gene expression                             | 17735 | 4403  | 111 | 42 | 29.37 | 0.0044  | 1.430031 | AARSD1;ACTR5;AKIRIN2;CDK5RAP1;EXOSC2;EXOSC7;GEMIN8;GTF2IRD2;GTF2IRD2B;HKR1;KLKB1;MEAF6;MI     |
| tan | MF | GO:0005488 | binding                                     | 17735 | 11799 | 111 | 87 | 76.5  | 0.00466 | 1.137255 | AARSD1;ABCD4;ACTR5;AEN;ASNS;ATG16L1;C12orf65;CARKD;CD302;CDK20;CDK5RAP1;CLYBL;CNPY4;COQ6;     |
| tan | BP | GO:0051186 | cofactor metabolic process                  | 17735 | 233   | 111 | 6  | 1.55  | 0.00467 | 3.870968 | CARKD;COQ6;GPD1;LDHB;LIAS;RSAD1                                                               |
| tan | BP | GO:0045070 | positive regulation of viral genome repl... | 17735 | 16    | 111 | 2  | 0.11  | 0.00497 | 18.18182 | PPIE;PPIH                                                                                     |
| tan | BP | GO:0072524 | pyridine-containing compound metabolic p... | 17735 | 52    | 111 | 3  | 0.35  | 0.00502 | 8.571429 | CARKD;GPD1;LDHB                                                                               |
| tan | CC | GO:0005778 | peroxisomal membrane                        | 17735 | 55    | 111 | 3  | 0.35  | 0.0052  | 8.571429 | ABCD4;PEX11B;SLC25A17                                                                         |
| tan | CC | GO:0031903 | microbody membrane                          | 17735 | 55    | 111 | 3  | 0.35  | 0.0052  | 8.571429 | ABCD4;PEX11B;SLC25A17                                                                         |
| tan | MF | GO:0016896 | exoribonuclease activity, producing 5'-p... | 17735 | 17    | 111 | 2  | 0.11  | 0.00531 | 18.18182 | EXOSC2;EXOSC7                                                                                 |
| tan | BP | GO:0006334 | nucleosome assembly                         | 17735 | 108   | 111 | 4  | 0.72  | 0.00588 | 5.555556 | HIST1H2BC;HIST1H2BD;HIST2H2BF;NAP1L4                                                          |
| tan | MF | GO:0004532 | exoribonuclease activity                    | 17735 | 18    | 111 | 2  | 0.12  | 0.00595 | 16.66667 | EXOSC2;EXOSC7                                                                                 |
| tan | MF | GO:0043167 | ion binding                                 | 17735 | 5761  | 111 | 50 | 37.35 | 0.00615 | 1.338688 | AARSD1;ABCD4;ACTR5;ASNS;CARKD;CDK20;CDK5RAP1;CLYBL;COQ6;CRIP3;DNAH3;FGR;GTF2IRD2;GTF2IRD2     |
| tan | MF | GO:0016616 | oxidoreductase activity, acting on the C... | 17735 | 115   | 111 | 4  | 0.75  | 0.00664 | 5.333333 | GPD1;HSD17B7;LDHB;RDH16                                                                       |
| tan | MF | GO:0004527 | exonuclease activity                        | 17735 | 60    | 111 | 3  | 0.39  | 0.00692 | 7.692308 | AEN;EXOSC2;EXOSC7                                                                             |
| tan | BP | GO:0000413 | protein peptidyl-prolyl isomerization       | 17735 | 19    | 111 | 2  | 0.13  | 0.00699 | 15.38462 | PPIE;PPIH                                                                                     |
| tan | CC | GO:0000178 | exosome (RNase complex)                     | 17735 | 20    | 111 | 2  | 0.13  | 0.0071  | 15.38462 | EXOSC2;EXOSC7                                                                                 |
| tan | MF | GO:0051536 | iron-sulfur cluster binding                 | 17735 | 61    | 111 | 3  | 0.4   | 0.00725 | 7.5      | CDK5RAP1;LIAS;RSAD1                                                                           |
| tan | MF | GO:0051540 | metal cluster binding                       | 17735 | 61    | 111 | 3  | 0.4   | 0.00725 | 7.5      | CDK5RAP1;LIAS;RSAD1                                                                           |
| tan | BP | GO:0031497 | chromatin assembly                          | 17735 | 119   | 111 | 4  | 0.79  | 0.00824 | 5.063291 | HIST1H2BC;HIST1H2BD;HIST2H2BF;NAP1L4                                                          |
| tan | BP | GO:0006732 | coenzyme metabolic process                  | 17735 | 190   | 111 | 5  | 1.27  | 0.00884 | 3.937008 | CARKD;COQ6;GPD1;LDHB;LIAS                                                                     |
| tan | CC | GO:0000786 | nucleosome                                  | 17735 | 67    | 111 | 3  | 0.43  | 0.009   | 6.976744 | HIST1H2BC;HIST1H2BD;HIST2H2BF                                                                 |
| tan | BP | GO:1901362 | organic cyclic compound biosynthetic pro... | 17735 | 3752  | 111 | 36 | 25.03 | 0.00903 | 1.438274 | ACTR5;AKIRIN2;GTF2IRD2;GTF2IRD2B;HKR1;HSD17B7;LIAS;MEAF6;NPR2;PCID2;POLR1C;PPIE;PRPSAP2;RSAD  |
| tan | BP | GO:0019674 | NAD metabolic process                       | 17735 | 22    | 111 | 2  | 0.15  | 0.00933 | 13.33333 | GPD1;LDHB                                                                                     |
| tan | BP | GO:0044238 | primary metabolic process                   | 17735 | 8755  | 111 | 70 | 58.4  | 0.00936 | 1.19863  | AARSD1;ACTR5;AKIRIN2;ALDH8A1;ASNS;BPHL;CARKD;CDK5RAP1;DNAJC9;DPH2;DUSP6;EXOSC2;EXOSC7;FAI     |
| tan | MF | GO:0016614 | oxidoreductase activity, acting on CH-OH... | 17735 | 128   | 111 | 4  | 0.83  | 0.00961 | 4.819277 | GPD1;HSD17B7;LDHB;RDH16                                                                       |
| tan | MF | GO:0004540 | ribonuclease activity                       | 17735 | 68    | 111 | 3  | 0.44  | 0.00977 | 6.818182 | EXOSC2;EXOSC7;RPP38                                                                           |
| tan | BP | GO:0044260 | cellular macromolecule metabolic process    | 17735 | 6621  | 111 | 56 | 44.17 | 0.01034 | 1.267829 | AARSD1;ACTR5;AKIRIN2;ASNS;CDK5RAP1;DNAJC9;DPH2;DUSP6;EXOSC2;EXOSC7;FANCE;FGR;GALNT12;GEV      |
| tan | BP | GO:0018130 | heterocycle biosynthetic process            | 17735 | 3650  | 111 | 35 | 24.35 | 0.01038 | 1.437372 | ACTR5;AKIRIN2;GTF2IRD2;GTF2IRD2B;HKR1;LIAS;MEAF6;NPR2;PCID2;POLR1C;PPIE;PRPSAP2;RSAD1;SIRT5;S |
| tan | CC | GO:0043229 | intracellular organelle                     | 17735 | 10522 | 111 | 79 | 67.2  | 0.0104  | 1.175595 | ABCD4;ACTR5;AEN;AKIRIN2;AP3M2;AP4B1;ATG16L1;BPHL;C12orf65;CARKD;CDK20;CIAPIN1;CLYBL;COQ10A    |
| tan | BP | GO:0034470 | ncRNA processing                            | 17735 | 198   | 111 | 5  | 1.32  | 0.01045 | 3.787879 | CDK5RAP1;EXOSC2;EXOSC7;RBFA;RPP38                                                             |
| tan | MF | GO:0016796 | exonuclease activity, active with either... | 17735 | 24    | 111 | 2  | 0.16  | 0.01047 | 12.5     | EXOSC2;EXOSC7                                                                                 |
| tan | BP | GO:0034728 | nucleosome organization                     | 17735 | 128   | 111 | 4  | 0.85  | 0.01058 | 4.705882 | HIST1H2BC;HIST1H2BD;HIST2H2BF;NAP1L4                                                          |
| tan | CC | GO:0043226 | organelle                                   | 17735 | 10552 | 111 | 79 | 67.39 | 0.0115  | 1.172281 | ABCD4;ACTR5;AEN;AKIRIN2;AP3M2;AP4B1;ATG16L1;BPHL;C12orf65;CARKD;CDK20;CIAPIN1;CLYBL;COQ10A    |
| tan | BP | GO:0000291 | nuclear-transcribed mRNA catabolic proce... | 17735 | 26    | 111 | 2  | 0.17  | 0.0129  | 11.76471 | EXOSC2;EXOSC7                                                                                 |
| tan | BP | GO:0043928 | exonucleolytic nuclear-transcribed mRNA ... | 17735 | 26    | 111 | 2  | 0.17  | 0.0129  | 11.76471 | EXOSC2;EXOSC7                                                                                 |
| tan | MF | GO:0015932 | nucleobase-containing compound transmemb... | 17735 | 27    | 111 | 2  | 0.18  | 0.01314 | 11.11111 | SLC25A17;SLC25A4                                                                              |
| tan | BP | GO:0065004 | protein-DNA complex assembly                | 17735 | 137   | 111 | 4  | 0.91  | 0.01331 | 4.395604 | HIST1H2BC;HIST1H2BD;HIST2H2BF;NAP1L4                                                          |
| tan | CC | GO:0044452 | nucleolar part                              | 17735 | 28    | 111 | 2  | 0.18  | 0.0137  | 11.11111 | POLR1C;RPP38                                                                                  |
| tan | CC | GO:0005634 | nucleus                                     | 17735 | 5873  | 111 | 49 | 37.51 | 0.0138  | 1.306318 | ACTR5;AEN;AKIRIN2;CDK20;CIAPIN1;DSN1;DUSP6;EXOSC2;EXOSC7;FANCE;GEMIN8;GTF2IRD2;GTF2IRD2B;H    |
| tan | CC | GO:0044438 | microbody part                              | 17735 | 79    | 111 | 3  | 0.5   | 0.0141  | 6        | ABCD4;PEX11B;SLC25A17                                                                         |
| tan | CC | GO:0044439 | peroxisomal part                            | 17735 | 79    | 111 | 3  | 0.5   | 0.0141  | 6        | ABCD4;PEX11B;SLC25A17                                                                         |
| tan | BP | GO:0006333 | chromatin assembly or disassembly           | 17735 | 140   | 111 | 4  | 0.93  | 0.01431 | 4.301075 | HIST1H2BC;HIST1H2BD;HIST2H2BF;NAP1L4                                                          |
| tan | BP | GO:0044271 | cellular nitrogen compound biosynthetic ... | 17735 | 3726  | 111 | 35 | 24.86 | 0.01431 | 1.407884 | ACTR5;AKIRIN2;ASNS;GTF2IRD2;GTF2IRD2B;HKR1;MEAF6;NPR2;PCID2;POLR1C;PPIE;PRPSAP2;RSAD1;SIRT5;  |
| tan | CC | GO:0030131 | clathrin adaptor complex                    | 17735 | 29    | 111 | 2  | 0.19  | 0.0147  | 10.52632 | AP3M2;AP4B1                                                                                   |
| tan | BP | GO:0018208 | peptidyl-proline modification               | 17735 | 28    | 111 | 2  | 0.19  | 0.01487 | 10.52632 | PPIE;PPIH                                                                                     |
| tan | BP | GO:0006351 | transcription, DNA-dependent                | 17735 | 3208  | 111 | 31 | 21.4  | 0.01529 | 1.448598 | ACTR5;AKIRIN2;GTF2IRD2;GTF2IRD2B;HKR1;MEAF6;PCID2;POLR1C;PPIE;SIRT5;SUPT7L;TCEA3;TGF83;WDR7   |
| tan | BP | GO:0019438 | aromatic compound biosynthetic process      | 17735 | 3638  | 111 | 34 | 24.27 | 0.01731 | 1.400906 | ACTR5;AKIRIN2;GTF2IRD2;GTF2IRD2B;HKR1;MEAF6;NPR2;PCID2;POLR1C;PPIE;PRPSAP2;RSAD1;SIRT5;SUPT   |
| tan | BP | GO:0000387 | spliceosomal snRNP assembly                 | 17735 | 31    | 111 | 2  | 0.21  | 0.01806 | 9.52381  | GEMIN8;WDR77                                                                                  |
| tan | BP | GO:0006323 | DNA packaging                               | 17735 | 153   | 111 | 4  | 1.02  | 0.0192  | 3.921569 | HIST1H2BC;HIST1H2BD;HIST2H2BF;NAP1L4                                                          |
| tan | MF | GO:0008408 | 3'-5' exonuclease activity                  | 17735 | 33    | 111 | 2  | 0.21  | 0.01928 | 9.52381  | EXOSC2;EXOSC7                                                                                 |
| tan | BP | GO:0006355 | regulation of transcription, DNA-depende... | 17735 | 2869  | 111 | 28 | 19.14 | 0.0194  | 1.462905 | ACTR5;AKIRIN2;GTF2IRD2;GTF2IRD2B;HKR1;MEAF6;PCID2;PPIE;SIRT5;SUPT7L;TCEA3;TGF83;WDR77;ZNF20   |
| tan | BP | GO:0022613 | ribonucleoprotein complex biogenesis        | 17735 | 233   | 111 | 5  | 1.55  | 0.01983 | 3.225806 | EXOSC2;EXOSC7;GEMIN8;RBFA;WDR77                                                               |
| tan | MF | GO:0004518 | nuclease activity                           | 17735 | 161   | 111 | 4  | 1.04  | 0.02068 | 3.846154 | AEN;EXOSC2;EXOSC7;RPP38                                                                       |
| tan | BP | GO:0044249 | cellular biosynthetic process               | 17735 | 5073  | 111 | 44 | 33.84 | 0.02082 | 1.300236 | AARSD1;ACTR5;AKIRIN2;ALDH8A1;ASNS;COQ6;DPH2;GALNT12;GPD1;GTF2IRD2;GTF2IRD2B;HKR1;HSD17B7      |
| tan | BP | GO:0071824 | protein-DNA complex subunit organization    | 17735 | 157   | 111 | 4  | 1.05  | 0.02089 | 3.809524 | HIST1H2BC;HIST1H2BD;HIST2H2BF;NAP1L4                                                          |
| tan | BP | GO:0020141 | regulation of RNA biosynthetic process      | 17735 | 2889  | 111 | 28 | 19.27 | 0.02115 | 1.453036 | ACTR5;AKIRIN2;GTF2IRD2;GTF2IRD2B;HKR1;MEAF6;PCID2;PPIE;SIRT5;SUPT7L;TCEA3;TGF83;WDR77;ZNF20   |
| tan | BP | GO:0032774 | RNA biosynthetic process                    | 17735 | 3293  | 111 | 31 | 21.97 | 0.02183 | 1.411015 | ACTR5;AKIRIN2;GTF2IRD2;GTF2IRD2B;HKR1;MEAF6;PCID2;POLR1C;PPIE;SIRT5;SUPT7L;TCEA3;TGF83;WDR7   |
| tan | CC | GO:0030119 | AP-type membrane coat adaptor complex       | 17735 | 36    | 111 | 2  | 0.23  | 0.0221  | 8.695652 | AP3M2;AP4B1                                                                                   |
| tan | BP | GO:0034654 | nucleobase-containing compound biosynthe... | 17735 | 3583  | 111 | 33 | 23.9  | 0.02375 | 1.380753 | ACTR5;AKIRIN2;GTF2IRD2;GTF2IRD2B;HKR1;MEAF6;NPR2;PCID2;POLR1C;PPIE;PRPSAP2;SIRT5;SUPT7L;TCEA  |
| tan | MF | GO:0003755 | peptidyl-prolyl cis-trans isomerase acti... | 17735 | 37    | 111 | 2  | 0.24  | 0.02392 | 8.333333 | PPIE;PPIH                                                                                     |
| tan | MF | GO:0048037 | cofactor binding                            | 17735 | 255   | 111 | 5  | 1.65  | 0.02511 | 3.030303 | ASNS;COQ6;GPD1;LDHB;SIRT5                                                                     |
| tan | MF | GO:0016859 | cis-trans isomerase activity                | 17735 | 39    | 111 | 2  | 0.25  | 0.02639 | 8        | PPIE;PPIH                                                                                     |
| tan | BP | GO:0051252 | regulation of RNA metabolic process         | 17735 | 2953  | 111 | 28 | 19.7  | 0.02765 | 1.42132  | ACTR5;AKIRIN2;GTF2IRD2;GTF2IRD2B;HKR1;MEAF6;PCID2;PPIE;SIRT5;SUPT7L;TCEA3;TGF83;WDR77;ZNF20   |
| tan | CC | GO:0030118 | clathrin coat                               | 17735 | 41    | 111 | 2  | 0.26  | 0.0282  | 7.692308 | AP3M2;AP4B1                                                                                   |

|        |    |            |                                             |       |      |     |    |       |          |          |                                                                                                           |
|--------|----|------------|---------------------------------------------|-------|------|-----|----|-------|----------|----------|-----------------------------------------------------------------------------------------------------------|
| tan    | BP | GO:0006396 | RNA processing                              | 17735 | 646  | 111 | 9  | 4.31  | 0.02834  | 2.088167 | CDK5RAP1;EXOSC2;EXOSC7;GEMIN8;PPIE;PPIH;RBFA;RPP38;WDR77                                                  |
| tan    | MF | GO:0005062 | coenzyme binding                            | 17735 | 179  | 111 | 4  | 1.16  | 0.02908  | 3.448276 | COQ6;GP11;LDHB;SIRT5                                                                                      |
| tan    | BP | GO:0006364 | rRNA processing                             | 17735 | 105  | 111 | 3  | 0.7   | 0.03309  | 4.285714 | EXOSC2;EXOSC7;RBFA                                                                                        |
| tan    | CC | GO:0032993 | protein-DNA complex                         | 17735 | 110  | 111 | 3  | 0.7   | 0.0334   | 4.285714 | HIST1H2BC;HIST1H2BD;HIST2H2BF                                                                             |
| tan    | BP | GO:0009058 | biosynthetic process                        | 17735 | 5219 | 111 | 44 | 34.81 | 0.03396  | 1.264005 | AARSD1;ACTRS;AKIRIN2;ALDH8A1;ASNS;COQ6;DPH2;GALNT12;GPD1;GTF2IRD2;GTF2IRD2B;HKR1;HSD17B7                  |
| tan    | BP | GO:0071103 | DNA conformation change                     | 17735 | 189  | 111 | 4  | 1.26  | 0.03766  | 3.174603 | HIST1H2BC;HIST1H2BD;HIST2H2BF;NAP1L4                                                                      |
| tan    | BP | GO:0043966 | histone H3 acetylation                      | 17735 | 46   | 111 | 2  | 0.31  | 0.0377   | 6.451613 | MEAF6;SUPT7L                                                                                              |
| tan    | BP | GO:0016072 | rRNA metabolic process                      | 17735 | 111  | 111 | 3  | 0.74  | 0.03807  | 4.054054 | EXOSC2;EXOSC7;RBFA                                                                                        |
| tan    | CC | GO:0005758 | mitochondrial intermembrane space           | 17735 | 49   | 111 | 2  | 0.31  | 0.0391   | 6.451613 | FGR;SIRT5                                                                                                 |
| tan    | BP | GO:0051704 | multi-organism process                      | 17735 | 1380 | 111 | 15 | 9.21  | 0.0396   | 1.628664 | AKIRIN2;DNAJC9;FGR;HIST1H2BC;IL24;LIAS;NUP43;OVGP1;PPIE;PPIH;SLC25A4;STMN1;TGF3;ZNF202;ZNF2               |
| tan    | BP | GO:0043170 | macromolecule metabolic process             | 17735 | 7334 | 111 | 58 | 48.92 | 0.03996  | 1.185609 | AARSD1;ACTRS;AKIRIN2;ASNS;CDK5RAP1;DNAJC9;DPH2;DUSP6;EXOSC2;EXOSC7;FANCE;FGR;GALNT12;GEM                  |
| tan    | BP | GO:0033013 | tetrapyrrole metabolic process              | 17735 | 48   | 111 | 2  | 0.32  | 0.04074  | 6.25     | ABCD4;RSAD1                                                                                               |
| tan    | BP | GO:0045069 | regulation of viral genome replication      | 17735 | 48   | 111 | 2  | 0.32  | 0.04074  | 6.25     | PPIE;PPIH                                                                                                 |
| tan    | BP | GO:1901576 | organic substance biosynthetic process      | 17735 | 5154 | 111 | 43 | 34.38 | 0.0434   | 1.250727 | AARSD1;ACTRS;AKIRIN2;ALDH8A1;ASNS;COQ6;GALNT12;GPD1;GTF2IRD2;GTF2IRD2B;HKR1;HSD17B7;LIAS;I                |
| tan    | CC | GO:0005777 | peroxisome                                  | 17735 | 123  | 111 | 3  | 0.79  | 0.0442   | 3.797468 | ABCD4;PEX11B;SLC25A17                                                                                     |
| tan    | CC | GO:0042579 | microbody                                   | 17735 | 123  | 111 | 3  | 0.79  | 0.0442   | 3.797468 | ABCD4;PEX11B;SLC25A17                                                                                     |
| tan    | CC | GO:0005730 | nucleolus                                   | 17735 | 622  | 111 | 8  | 3.97  | 0.0457   | 2.015113 | AEN;CIAPIN1;EXOSC2;EXOSC7;MEAF6;NVL;POLR1C;RPP38                                                          |
| tan    | BP | GO:0006399 | tRNA metabolic process                      | 17735 | 121  | 111 | 3  | 0.81  | 0.04715  | 3.703704 | AARSD1;CDK5RAP1;RPP38                                                                                     |
| tan    | CC | GO:0031970 | organelle envelope lumen                    | 17735 | 56   | 111 | 2  | 0.36  | 0.0498   | 5.555556 | FGR;SIRT5                                                                                                 |
| salmon | CC | GO:0022627 | cytosolic small ribosomal subunit           | 17735 | 36   | 114 | 20 | 0.24  | 1.00E-30 | 83.33333 | FAU;MRPS7;RPS11;RPS12;RPS13;RPS14;RPS16;RPS18;RPS19;RPS20;RPS21;RPS23;RPS25;RPS27A;RPS3;RPS4              |
| salmon | CC | GO:0022626 | cytosolic ribosome                          | 17735 | 91   | 114 | 39 | 0.61  | 1.00E-30 | 63.93443 | FAU;MRPS7;RPL10;RPL10A;RPL12;RPL13A;RPL14;RPL19;RPL22;RPL23A;RPL24;RPL27A;RPL3;RPL32;RPL35A;R             |
| salmon | BP | GO:0006415 | translational termination                   | 17735 | 91   | 114 | 39 | 0.67  | 1.00E-30 | 58.20896 | FAU;ICT1;RPL10;RPL10A;RPL12;RPL13A;RPL14;RPL19;RPL22;RPL23A;RPL24;RPL27A;RPL3;RPL32;RPL35A;RPL            |
| salmon | CC | GO:0015935 | small ribosomal subunit                     | 17735 | 60   | 114 | 21 | 0.4   | 1.00E-30 | 52.5     | FAU;MRPS16;MRPS7;RPS11;RPS12;RPS13;RPS14;RPS16;RPS18;RPS19;RPS20;RPS21;RPS23;RPS25;RPS27A;R               |
| salmon | BP | GO:0006134 | SRP-dependent cotranslational protein ta... | 17735 | 105  | 114 | 39 | 0.77  | 1.00E-30 | 50.64935 | FAU;RPL10;RPL10A;RPL12;RPL13A;RPL14;RPL19;RPL22;RPL23A;RPL24;RPL27A;RPL3;RPL32;RPL35A;RPL36;R             |
| salmon | BP | GO:0006613 | cotranslational protein targeting to mem... | 17735 | 107  | 114 | 39 | 0.79  | 1.00E-30 | 49.36709 | FAU;RPL10;RPL10A;RPL12;RPL13A;RPL14;RPL19;RPL22;RPL23A;RPL24;RPL27A;RPL3;RPL32;RPL35A;RPL36;R             |
| salmon | BP | GO:0045047 | protein targeting to ER                     | 17735 | 107  | 114 | 39 | 0.79  | 1.00E-30 | 49.36709 | FAU;RPL10;RPL10A;RPL12;RPL13A;RPL14;RPL19;RPL22;RPL23A;RPL24;RPL27A;RPL3;RPL32;RPL35A;RPL36;R             |
| salmon | BP | GO:0006414 | translational elongation                    | 17735 | 108  | 114 | 39 | 0.79  | 1.00E-30 | 49.36709 | FAU;RPL10;RPL10A;RPL12;RPL13A;RPL14;RPL19;RPL22;RPL23A;RPL24;RPL27A;RPL3;RPL32;RPL35A;RPL36;R             |
| salmon | BP | GO:0072599 | establishment of protein localization to... | 17735 | 108  | 114 | 39 | 0.79  | 1.00E-30 | 49.36709 | FAU;RPL10;RPL10A;RPL12;RPL13A;RPL14;RPL19;RPL22;RPL23A;RPL24;RPL27A;RPL3;RPL32;RPL35A;RPL36;R             |
| salmon | CC | GO:0044391 | ribosomal subunit                           | 17735 | 134  | 114 | 41 | 0.9   | 1.00E-30 | 45.55556 | FAU;ICT1;MRPS16;MRPS7;RPL10;RPL10A;RPL12;RPL13A;RPL14;RPL19;RPL22;RPL23A;RPL24;RPL27A;RPL3;RPL32;RPL35A;R |
| salmon | BP | GO:0070972 | protein localization to endoplasmic reti... | 17735 | 121  | 114 | 39 | 0.89  | 1.00E-30 | 43.82022 | FAU;RPL10;RPL10A;RPL12;RPL13A;RPL14;RPL19;RPL22;RPL23A;RPL24;RPL27A;RPL3;RPL32;RPL35A;RPL36;R             |
| salmon | BP | GO:0000184 | nuclear-transcribed mRNA catabolic proce... | 17735 | 118  | 114 | 38 | 0.87  | 1.00E-30 | 43.67816 | FAU;RPL10;RPL10A;RPL12;RPL13A;RPL14;RPL19;RPL22;RPL23A;RPL24;RPL27A;RPL3;RPL32;RPL35A;RPL36;R             |
| salmon | MF | GO:0003735 | structural constituent of ribosome          | 17735 | 157  | 114 | 40 | 1.05  | 1.00E-30 | 38.09524 | FAU;MRPS16;MRPS7;RPL10;RPL10A;RPL12;RPL13A;RPL14;RPL19;RPL22;RPL23A;RPL24;RPL27A;RPL3;RPL32;              |
| salmon | BP | GO:0006612 | protein targeting to membrane               | 17735 | 151  | 114 | 40 | 1.11  | 1.00E-30 | 36.03604 | FAU;MYL12A;RPL10;RPL10A;RPL12;RPL13A;RPL14;RPL19;RPL22;RPL23A;RPL24;RPL27A;RPL3;RPL32;RPL35A;R            |
| salmon | BP | GO:0019080 | viral genome expression                     | 17735 | 148  | 114 | 39 | 1.09  | 1.00E-30 | 35.77982 | FAU;POLR2H;RPL10;RPL10A;RPL12;RPL13A;RPL14;RPL19;RPL22;RPL23A;RPL24;RPL27A;RPL3;RPL32;RPL35A;R            |
| salmon | BP | GO:0019083 | viral transcription                         | 17735 | 148  | 114 | 39 | 1.09  | 1.00E-30 | 35.77982 | FAU;POLR2H;RPL10;RPL10A;RPL12;RPL13A;RPL14;RPL19;RPL22;RPL23A;RPL24;RPL27A;RPL3;RPL32;RPL35A;R            |
| salmon | BP | GO:0006413 | translational initiation                    | 17735 | 152  | 114 | 40 | 1.12  | 1.00E-30 | 35.71429 | EIF3H;EIF3M;FAU;RPL10;RPL10A;RPL12;RPL13A;RPL14;RPL19;RPL22;RPL23A;RPL24;RPL27A;RPL3;RPL32;RPL3           |
| salmon | BP | GO:0043624 | cellular protein complex disassembly        | 17735 | 158  | 114 | 39 | 1.16  | 1.00E-30 | 33.62069 | FAU;ICT1;RPL10;RPL10A;RPL12;RPL13A;RPL14;RPL19;RPL22;RPL23A;RPL24;RPL27A;RPL3;RPL32;RPL35A;RPL            |
| salmon | CC | GO:0044445 | cytosolic part                              | 17735 | 181  | 114 | 40 | 1.21  | 1.00E-30 | 33.05785 | FAU;MRPS7;RPL10;RPL10A;RPL12;RPL13A;RPL14;RPL19;RPL22;RPL23A;RPL24;RPL27A;RPL3;RPL32;RPL35A;R             |
| salmon | BP | GO:0043241 | protein complex disassembly                 | 17735 | 163  | 114 | 39 | 1.2   | 1.00E-30 | 32.5     | FAU;ICT1;RPL10;RPL10A;RPL12;RPL13A;RPL14;RPL19;RPL22;RPL23A;RPL24;RPL27A;RPL3;RPL32;RPL35A;R              |
| salmon | BP | GO:0000956 | nuclear-transcribed mRNA catabolic proce... | 17735 | 169  | 114 | 38 | 1.24  | 1.00E-30 | 30.64516 | FAU;RPL10;RPL10A;RPL12;RPL13A;RPL14;RPL19;RPL22;RPL23A;RPL24;RPL27A;RPL3;RPL32;RPL35A;RPL36;R             |
| salmon | CC | GO:0005840 | ribosome                                    | 17735 | 206  | 114 | 41 | 1.38  | 1.00E-30 | 29.71014 | FAU;ICT1;MRPS16;MRPS7;RPL10;RPL10A;RPL12;RPL13A;RPL14;RPL19;RPL22;RPL23A;RPL24;RPL27A;RPL3;RPL32;         |
| salmon | BP | GO:0032984 | macromolecular complex disassembly          | 17735 | 184  | 114 | 39 | 1.35  | 1.00E-30 | 28.88889 | FAU;ICT1;RPL10;RPL10A;RPL12;RPL13A;RPL14;RPL19;RPL22;RPL23A;RPL24;RPL27A;RPL3;RPL32;RPL35A;RPL            |
| salmon | BP | GO:0006402 | mRNA catabolic process                      | 17735 | 179  | 114 | 38 | 1.32  | 1.00E-30 | 28.78788 | FAU;RPL10;RPL10A;RPL12;RPL13A;RPL14;RPL19;RPL22;RPL23A;RPL24;RPL27A;RPL3;RPL32;RPL35A;RPL36;R             |
| salmon | BP | GO:0072594 | establishment of protein localization to... | 17735 | 210  | 114 | 40 | 1.55  | 1.00E-30 | 25.80645 | FAU;RPL10;RPL10A;RPL12;RPL13A;RPL14;RPL19;RPL22;RPL23A;RPL24;RPL27A;RPL3;RPL32;RPL35A;RPL36;R             |
| salmon | BP | GO:0019058 | viral infectious cycle                      | 17735 | 223  | 114 | 41 | 1.64  | 1.00E-30 | 25       | FAU;POLR2H;PPIA;RAN;RPL10;RPL10A;RPL12;RPL13A;RPL14;RPL19;RPL22;RPL23A;RPL24;RPL27A;RPL3;RPL32;           |
| salmon | BP | GO:0006401 | RNA catabolic process                       | 17735 | 206  | 114 | 38 | 1.52  | 1.00E-30 | 25       | FAU;RPL10;RPL10A;RPL12;RPL13A;RPL14;RPL19;RPL22;RPL23A;RPL24;RPL27A;RPL3;RPL32;RPL35A;RPL36;R             |
| salmon | BP | GO:0022411 | cellular component disassembly              | 17735 | 296  | 114 | 39 | 2.18  | 1.00E-30 | 17.88991 | FAU;ICT1;RPL10;RPL10A;RPL12;RPL13A;RPL14;RPL19;RPL22;RPL23A;RPL24;RPL27A;RPL3;RPL32;RPL35A;RPL            |
| salmon | BP | GO:0006412 | translation                                 | 17735 | 464  | 114 | 46 | 3.41  | 1.00E-30 | 13.48974 | EIF3H;EIF3M;FAU;ICT1;MRPS16;MRPS7;NACA;RPL10;RPL10A;RPL12;RPL13A;RPL14;RPL19;RPL22;RPL23A;RPL             |
| salmon | CC | GO:0030529 | ribonucleoprotein complex                   | 17735 | 573  | 114 | 47 | 3.83  | 1.00E-30 | 12.27154 | FAU;HNRNP1A1;ICT1;SY1;MRPS16;MRPS7;NPM1;POP4;RPL10;RPL10A;RPL12;RPL13A;RPL14;RPL19;RPL22;RPL23A;RPL24;R   |
| salmon | BP | GO:0006605 | protein targeting                           | 17735 | 479  | 114 | 43 | 3.52  | 1.00E-30 | 12.21591 | FAU;MYL12A;PRDX1;RPL10;RPL10A;RPL12;RPL13A;RPL14;RPL19;RPL22;RPL23A;RPL24;RPL27A;RPL3;RPL32;R             |
| salmon | BP | GO:0022415 | viral reproductive process                  | 17735 | 542  | 114 | 47 | 3.99  | 1.00E-30 | 11.77945 | C9orf156;FAU;HNRNP1A1;NACA;NPM1;PDC3;POLR2H;PPIA;PSMB6;RAN;RPL10;RPL10A;RPL12;RPL13A;RPL14;R              |
| salmon | BP | GO:0033365 | protein localization to organelle           | 17735 | 510  | 114 | 42 | 3.75  | 1.00E-30 | 11.2     | FAU;PRDX1;RPL10;RPL10A;RPL12;RPL13A;RPL14;RPL19;RPL22;RPL23A;RPL24;RPL27A;RPL3;RPL32;RPL35A;R             |
| salmon | BP | GO:0016071 | mRNA metabolic process                      | 17735 | 607  | 114 | 47 | 4.47  | 1.00E-30 | 10.51454 | FAU;HNRNP1A1;SY1;POLR2H;POP4;PSMAS;PSMB6;RPL10;RPL10A;RPL12;RPL13A;RPL14;RPL19;RPL22;RPL23A;R             |
| salmon | BP | GO:0016032 | viral reproduction                          | 17735 | 689  | 114 | 49 | 5.07  | 1.00E-30 | 9.664694 | C9orf156;FAU;HNRNP1A1;NACA;NPM1;PDC3;POLR2H;PPIA;PSMAS;PSMB6;RAN;RPL10;RPL10A;RPL12;RPL13A;R              |
| salmon | BP | GO:0044763 | multi-organism cellular process             | 17735 | 691  | 114 | 49 | 5.08  | 1.00E-30 | 9.645669 | C9orf156;FAU;HNRNP1A1;NACA;NPM1;PDC3;POLR2H;PPIA;PSMAS;PSMB6;RAN;RPL10;RPL10A;RPL12;RPL13A;R              |
| salmon | BP | GO:0044704 | multi-organism reproductive process         | 17735 | 730  | 114 | 47 | 5.37  | 1.00E-30 | 8.752328 | C9orf156;FAU;HNRNP1A1;NACA;NPM1;PDC3;POLR2H;PPIA;PSMB6;RAN;RPL10;RPL10A;RPL12;RPL13A;RPL14;R              |
| salmon | BP | GO:0006886 | intracellular protein transport             | 17735 | 702  | 114 | 45 | 5.17  | 1.00E-30 | 8.704062 | FAU;MYL12A;NPM1;PRDX1;RAN;RPL10;RPL10A;RPL12;RPL13A;RPL14;RPL19;RPL22;RPL23A;RPL24;RPL27A;R               |
| salmon | BP | GO:0016482 | cytoplasmic transport                       | 17735 | 719  | 114 | 46 | 5.29  | 1.00E-30 | 8.695652 | FAU;HNRNP1A1;PRDX1;RAN;RPL10;RPL10A;RPL12;RPL13A;RPL14;RPL19;RPL22;RPL23A;RPL24;RPL27A;RPL3;R             |
| salmon | MF | GO:0005198 | structural molecule activity                | 17735 | 620  | 114 | 41 | 4.14  | 1.30E-30 | 9.903382 | FAU;MRPS16;MRPS7;MYL5;RPL10;RPL10A;RPL12;RPL13A;RPL14;RPL19;RPL22;RPL23A;RPL24;RPL27A;RPL3;R              |
| salmon | BP | GO:0048610 | cellular process involved in reproductio... | 17735 | 544  | 114 | 40 | 4     | 8.20E-30 | 10       | FAU;POLR2H;RPL10;RPL10A;RPL12;RPL13A;RPL14;RPL19;RPL22;RPL23A;RPL24;RPL27A;RPL3;RPL32;RPL35A;R            |
| salmon | BP | GO:0044265 | cellular macromolecule catabolic process    | 17735 | 698  | 114 | 43 | 5.14  | 5.00E-29 | 8.365759 | COMMD1;FAU;PSMAS;PSMB6;RPL10;RPL10A;RPL12;RPL13A;RPL14;RPL19;RPL22;RPL23A;RPL24;RPL27A;R                  |
| salmon | CC | GO:0022625 | cytosolic large ribosomal subunit           | 17735 | 52   | 114 | 19 | 0.35  | 6.10E-29 | 54.28571 | RPL10;RPL10A;RPL12;RPL13A;RPL14;RPL19;RPL22;RPL23A;RPL24;RPL27A;RPL3;RPL32;RPL35A;RPL36;RPL37             |
| salmon | CC | GO:0015934 | large ribosomal subunit                     | 17735 | 75   | 114 | 20 | 0.5   | 3.20E-27 | 40       | ICT1;RPL10;RPL10A;RPL12;RPL13A;RPL14;RPL19;RPL22;RPL23A;RPL24;RPL27A;RPL3;RPL32;RPL35A;RPL36;R            |
| salmon | BP | GO:0034613 | cellular protein localization               | 17735 | 956  | 114 | 46 | 7.03  | 1.40E-26 | 6.543385 | FAU;MYL12A;NPM1;PRDX1;RAN;RANGRF;RPL10;RPL10A;RPL12;RPL13A;RPL14;RPL19;RPL22;RPL23A;RPL24;R               |
| salmon | BP | GO:0070727 | cellular macromolecule localization         | 17735 | 960  | 114 | 46 | 7.06  | 1.60E-26 | 6.515581 | FAU;MYL12A;NPM1;PRDX1;RAN;RANGRF;RPL10;RPL10A;RPL12;RPL13A;RPL14;RPL19;RPL22;RPL23A;RPL24;R               |
| salmon | BP | GO:0046907 | intracellular transport                     | 17735 | 1214 | 114 | 49 | 8.93  | 4.30E-25 | 5.487    |                                                                                                           |

|        |    |            |                                             |       |       |     |     |       |          |          |                                                                                              |
|--------|----|------------|---------------------------------------------|-------|-------|-----|-----|-------|----------|----------|----------------------------------------------------------------------------------------------|
| salmon | CC | GO:0005829 | cytosol                                     | 17735 | 2362  | 114 | 61  | 15.79 | 9.50E-24 | 3.863205 | ATP6V1E2;BLVRA;CETN2;CHKB;DIABLO;EIF3H;FAU;ITGB1BP1;MDH1;MRP57;POMP;PIIA;PRDX1;PSMA5;PSV     |
| salmon | BP | GO:0051704 | multi-organism process                      | 17735 | 1380  | 114 | 50  | 10.15 | 1.50E-23 | 4.926108 | ATP6V1E2;C9orf156;FAU;HNRNPA1;NACA;NPM1;PDCL3;POLR2H;PIIA;PSMA5;PSMB6;RAN;RPL10;RPL10A;R     |
| salmon | CC | GO:0032991 | macromolecular complex                      | 17735 | 3893  | 114 | 75  | 26.03 | 7.40E-23 | 2.881291 | ATP6V1E2;CACYBP;CETN2;COMMD1;DIABLO;EIF3H;EIF3M;FAU;GTF3C6;HNRNPA1;ICT1;ISY1;MED10;MRP51     |
| salmon | BP | GO:0044270 | cellular nitrogen compound catabolic pro... | 17735 | 813   | 114 | 39  | 5.98  | 3.80E-22 | 6.521739 | BLVRA;FAU;RPL10;RPL10A;RPL12;RPL13A;RPL14;RPL19;RPL22;RPL23A;RPL24;RPL27A;RPL35A;R           |
| salmon | BP | GO:0046700 | heterocycle catabolic process               | 17735 | 813   | 114 | 39  | 5.98  | 3.80E-22 | 6.521739 | BLVRA;FAU;RPL10;RPL10A;RPL12;RPL13A;RPL14;RPL19;RPL22;RPL23A;RPL24;RPL27A;RPL35A;R           |
| salmon | BP | GO:0019439 | aromatic compound catabolic process         | 17735 | 815   | 114 | 39  | 6     | 4.10E-22 | 6.5      | BLVRA;FAU;RPL10;RPL10A;RPL12;RPL13A;RPL14;RPL19;RPL22;RPL23A;RPL24;RPL27A;RPL35A;R           |
| salmon | BP | GO:0034655 | nucleobase-containing compound catabolic... | 17735 | 770   | 114 | 38  | 5.67  | 5.60E-22 | 6.70194  | FAU;RPL10;RPL10A;RPL12;RPL13A;RPL14;RPL19;RPL22;RPL23A;RPL24;RPL27A;RPL35A;RPL36;R           |
| salmon | BP | GO:0022414 | reproductive process                        | 17735 | 1510  | 114 | 50  | 11.11 | 8.30E-22 | 4.50045  | C9orf156;CETN2;FAU;HNRNPA1;NACA;NPM1;PDCL3;POLR2H;PIIA;PSMB6;RAN;RPL10;RPL10A;RPL12;RPL13    |
| salmon | BP | GO:1901361 | organic cyclic compound catabolic proces... | 17735 | 849   | 114 | 39  | 6.25  | 1.80E-21 | 6.24     | BLVRA;FAU;RPL10;RPL10A;RPL12;RPL13A;RPL14;RPL19;RPL22;RPL23A;RPL24;RPL27A;RPL35A;R           |
| salmon | BP | GO:0071822 | protein complex subunit organization        | 17735 | 1027  | 114 | 42  | 7.56  | 2.50E-21 | 5.555556 | ARPC1A;FAU;ICT1;NPM1;POMP;RPL10;RPL10A;RPL12;RPL13A;RPL14;RPL19;RPL22;RPL23A;RPL24;RPL27A;R  |
| salmon | BP | GO:0043933 | macromolecular complex subunit organizat... | 17735 | 1289  | 114 | 46  | 9.49  | 3.90E-21 | 4.847208 | ARPC1A;FAU;ICT1;NAP11;NPM1;POMP;RPL10;RPL10A;RPL12;RPL13A;RPL14;RPL19;RPL22;RPL23A;RPL24;R   |
| salmon | BP | GO:0000003 | reproduction                                | 17735 | 1591  | 114 | 50  | 11.71 | 8.40E-21 | 4.269855 | C9orf156;CETN2;FAU;HNRNPA1;NACA;NPM1;PDCL3;POLR2H;PIIA;PSMB6;RAN;RPL10;RPL10A;RPL12;RPL13    |
| salmon | BP | GO:0008104 | protein localization                        | 17735 | 1586  | 114 | 49  | 11.67 | 5.30E-20 | 4.1988   | ATP6V1E2;FAU;MYL12A;NACA;NPM1;PIIA;PRDX1;RAN;RANGRF;RPL10;RPL10A;RPL12;RPL13A;RPL14;RPL19    |
| salmon | MF | GO:0003723 | RNA binding                                 | 17735 | 851   | 114 | 35  | 5.69  | 4.50E-19 | 6.151142 | EIF3H;EIF3M;FAU;HNRNPA1;ICT1;MRP57;NPM1;POP4;RPL10A;RPL12;RPL14;RPL19;RPL22;RPL23A;RPL24;RP  |
| salmon | BP | GO:0051649 | establishment of localization in cell       | 17735 | 1820  | 114 | 50  | 13.39 | 2.90E-18 | 3.73413  | FAU;HNRNPA1;MYL12A;NPM1;PIIA;PRDX1;RAN;RPL10;RPL10A;RPL12;RPL13A;RPL14;RPL19;RPL22;RPL23A;R  |
| salmon | CC | GO:0043228 | non-membrane-bounded organelle              | 17735 | 3122  | 114 | 62  | 20.87 | 3.50E-18 | 2.970771 | ARPC1A;CCDC77;CETN2;COMMD1;EBNA1BP2;FAU;HMGN1;HNRNPA1;ICT1;MDH1;MRP57;MYL12A                 |
| salmon | CC | GO:0043232 | intracellular non-membrane-bounded organ... | 17735 | 3122  | 114 | 62  | 20.87 | 3.50E-18 | 2.970771 | ARPC1A;CCDC77;CETN2;COMMD1;EBNA1BP2;FAU;HMGN1;HNRNPA1;ICT1;MDH1;MRP57;MYL12A                 |
| salmon | BP | GO:0033036 | macromolecule localization                  | 17735 | 1852  | 114 | 50  | 13.63 | 6.00E-18 | 3.668379 | ATP6V1E2;FAU;HNRNPA1;MYL12A;NACA;NPM1;PIIA;PRDX1;RAN;RANGRF;RPL10;RPL10A;RPL12;RPL13A;R      |
| salmon | BP | GO:0071702 | organic substance transport                 | 17735 | 1950  | 114 | 51  | 14.65 | 8.90E-18 | 3.554007 | ATP6V1E2;FAU;HNRNPA1;MYL12A;NACA;NPM1;PIIA;PRDX1;RAN;RANGRF;RPL10;RPL10A;RPL12;RPL13A;R      |
| salmon | BP | GO:0051641 | cellular localization                       | 17735 | 2049  | 114 | 51  | 15.08 | 7.50E-17 | 3.381963 | FAU;HNRNPA1;MYL12A;NPM1;PIIA;PRDX1;RAN;RANGRF;RPL10;RPL10A;RPL12;RPL13A;RPL14;RPL19;RPL22    |
| salmon | BP | GO:0044248 | cellular catabolic process                  | 17735 | 1692  | 114 | 46  | 12.45 | 2.00E-16 | 3.694779 | BLVRA;COMMD1;FAU;GSTM3;PRDX1;PSMA5;PSMB6;RAN;RPL10;RPL10A;RPL12;RPL13A;RPL14;RPL19;RPL22;R   |
| salmon | BP | GO:0022613 | ribonucleoprotein complex biogenesis        | 17735 | 233   | 114 | 20  | 1.71  | 3.80E-16 | 11.69591 | EBNA1BP2;NPM1;POP4;RPL13A;RPL14;RPL35A;RPL5;RPL7A;RPS14;RPS16;RPS18;RPS19;RPS21;RPS25;RPS6;R |
| salmon | CC | GO:0044422 | organelle part                              | 17735 | 6321  | 114 | 84  | 42.26 | 9.40E-16 | 1.987695 | CACYBP;CCDC77;CETN2;COMMD1;DIABLO;EBNA1BP2;FAU;GTF3C6;HMGN1;HNRNPA1;HS3T3B1;ICT1;ISY1;       |
| salmon | CC | GO:0044446 | intracellular organelle part                | 17735 | 6219  | 114 | 83  | 41.58 | 1.60E-15 | 1.996152 | CACYBP;CCDC77;CETN2;COMMD1;DIABLO;EBNA1BP2;FAU;GTF3C6;HMGN1;HNRNPA1;HS3T3B1;ICT1;ISY1;       |
| salmon | BP | GO:0090956 | catabolic process                           | 17735 | 1989  | 114 | 48  | 14.64 | 3.70E-15 | 3.278689 | BLVRA;COMMD1;FAU;GSTM3;PRDX1;PSMA5;PSMB6;RAN;RPL10;RPL10A;RPL12;RPL13A;RPL14;RPL19;R         |
| salmon | BP | GO:1901575 | organic substance catabolic process         | 17735 | 1842  | 114 | 46  | 13.55 | 5.30E-15 | 3.394834 | BLVRA;COMMD1;FAU;PSMA5;PSMB6;RAN;RPL10;RPL10A;RPL12;RPL13A;RPL14;RPL19;RPL22;R               |
| salmon | BP | GO:0042254 | ribosome biogenesis                         | 17735 | 151   | 114 | 16  | 1.11  | 1.60E-14 | 14.41441 | EBNA1BP2;NPM1;POP4;RPL14;RPL35A;RPL5;RPL7A;RPS14;RPS16;RPS18;RPS19;RPS21;RPS25;RPS6;RPS8;R   |
| salmon | BP | GO:0042274 | ribosomal small subunit biogenesis          | 17735 | 18    | 114 | 8   | 0.13  | 2.70E-13 | 61.53846 | RPS14;RPS16;RPS19;RPS21;RPS25;RPS6;RPS8;RPSA                                                 |
| salmon | BP | GO:0034645 | cellular macromolecule biosynthetic proc... | 17735 | 4170  | 114 | 66  | 30.68 | 1.10E-12 | 2.151239 | BTFS3;BU31;CACYBP;COMMD1;EIF3H;EIF3M;FAU;GTF3C6;HMGN1;HS3T3B1;ICT1;MED10;MRP56;MRP57         |
| salmon | BP | GO:0010467 | gene expression                             | 17735 | 4403  | 114 | 68  | 32.4  | 1.10E-12 | 2.098765 | BTFS3;BU31;COMMD1;EIF3H;EIF3M;FAU;GTF3C6;HMGN1;HNRNPA1;ICT1;ISY1;MED10;MRP56;MRP57;NA        |
| salmon | BP | GO:0044765 | single-organism transport                   | 17735 | 2753  | 114 | 52  | 20.26 | 3.20E-12 | 2.566634 | ATP6V1E2;FAU;HNRNPA1;MYL12A;NACA;NPM1;PIIA;PRDX1;RAN;RANGRF;RPL10;RPL10A;RPL12;RPL13A;R      |
| salmon | CC | GO:0044444 | cytoplasmic part                            | 17735 | 6562  | 114 | 80  | 43.87 | 4.00E-12 | 1.82357  | ATP6V1E2;BLVRA;CACYBP;CETN2;CHKB;DIABLO;EIF3H;EIF3M;FAU;HS3T3B1;ICT1;ITGB1BP1;MDH1;MRP51     |
| salmon | BP | GO:0009059 | macromolecule biosynthetic process          | 17735 | 4294  | 114 | 66  | 31.6  | 4.70E-12 | 2.088608 | BTFS3;BU31;CACYBP;COMMD1;EIF3H;EIF3M;FAU;GTF3C6;HMGN1;HS3T3B1;ICT1;MED10;MRP56;MRP57         |
| salmon | BP | GO:0044267 | cellular protein metabolic process          | 17735 | 3210  | 114 | 56  | 23.62 | 6.50E-12 | 2.370872 | COMMD1;EIF3H;EIF3M;FAU;ICT1;MRP56;MRP57;NACA;POLR2H;PIIA;PSMA5;PSMB6;RPL10;RPL10A;RPL12      |
| salmon | BP | GO:0090304 | nucleic acid metabolic process              | 17735 | 4431  | 114 | 66  | 32.61 | 2.20E-11 | 2.023919 | BTFS3;BU31;CACYBP;CETN2;COMMD1;FAU;GTF3C6;HMGN1;HNRNPA1;ISY1;MED10;NACA;NAP11;NPM1;F         |
| salmon | BP | GO:0016070 | RNA metabolic process                       | 17735 | 3911  | 114 | 61  | 28.78 | 4.50E-11 | 2.119527 | BTFS3;BU31;COMMD1;FAU;GTF3C6;HMGN1;HNRNPA1;ISY1;MED10;NACA;NAP11;NPM1;PCNA;PER2;POLR2H;P     |
| salmon | CC | GO:0005737 | cytoplasm                                   | 17735 | 9016  | 114 | 93  | 60.28 | 6.40E-11 | 1.5428   | ARPC1A;ATP6V1E2;BLVRA;CACYBP;CETN2;CHKB;COMMD1;DIABLO;EIF3H;EIF3M;FAU;GSTM3;HMGN1;HNR        |
| salmon | CC | GO:0044424 | intracellular part                          | 17735 | 12103 | 114 | 107 | 80.91 | 1.80E-10 | 1.322457 | ARPC1A;ATP6V1E2;BLVRA;BTFS3;BU31;C4orf27;CACYBP;CCDC77;CETN2;CHKB;COMMD1;DIABLO;EBNA1BP      |
| salmon | BP | GO:0032774 | RNA biosynthetic process                    | 17735 | 3293  | 114 | 54  | 24.23 | 2.60E-10 | 2.228642 | BTFS3;BU31;COMMD1;FAU;GTF3C6;HMGN1;MED10;NACA;NPM1;PCNA;PER2;POLR2H;RAN;RPL10;RPL10A;R       |
| salmon | BP | GO:0006364 | rRNA processing                             | 17735 | 105   | 114 | 11  | 0.77  | 2.80E-10 | 14.28571 | POP4;RPL14;RPL35A;RPL5;RPS14;RPS16;RPS19;RPS21;RPS6;RPS8;RPSA                                |
| salmon | BP | GO:0013840 | cellular component organization or bioge... | 17735 | 4237  | 114 | 62  | 31.18 | 4.60E-10 | 1.988454 | ARPC1A;ATP6V1E2;CETN2;EBNA1BP2;FAU;HMGN1;ICT1;MYL12A;NAP11;NPM1;PARL;PCNA;POMP;POP4;P        |
| salmon | BP | GO:0016072 | rRNA metabolic process                      | 17735 | 111   | 114 | 11  | 0.82  | 5.20E-10 | 13.41463 | POP4;RPL14;RPL35A;RPL5;RPS14;RPS16;RPS19;RPS21;RPS6;RPS8;RPSA                                |
| salmon | BP | GO:0006810 | transport                                   | 17735 | 3358  | 114 | 54  | 24.71 | 5.70E-10 | 2.18535  | ATP6V1E2;FAU;HNRNPA1;MYL12A;NACA;NPM1;PIIA;PRDX1;RAN;RANGRF;RPL10;RPL10A;RPL12;RPL13A;R      |
| salmon | BP | GO:0006725 | cellular aromatic compound metabolic pro... | 17735 | 5371  | 114 | 71  | 39.52 | 5.70E-10 | 1.796559 | BLVRA;BTFS3;BU31;CACYBP;CETN2;COMMD1;FAU;GSTM3;GTF3C6;HDHD1;HMGN1;HNRNPA1;ISY1;MED10         |
| salmon | BP | GO:0051234 | establishment of localization               | 17735 | 3408  | 114 | 54  | 25.08 | 1.00E-09 | 2.15311  | ATP6V1E2;FAU;HNRNPA1;MYL12A;NACA;NPM1;PIIA;PRDX1;RAN;RANGRF;RPL10;RPL10A;RPL12;RPL13A;R      |
| salmon | CC | GO:0043229 | intracellular organelle                     | 17735 | 10522 | 114 | 99  | 70.34 | 1.00E-09 | 1.40745  | ARPC1A;ATP6V1E2;BTFS3;BU31;C4orf27;CACYBP;CCDC77;CETN2;COMMD1;DIABLO;EBNA1BP2;FAU;GTF3C      |
| salmon | CC | GO:0005622 | intracellular                               | 17735 | 12344 | 114 | 107 | 82.52 | 1.10E-09 | 1.296655 | ARPC1A;ATP6V1E2;BLVRA;BTFS3;BU31;C4orf27;CACYBP;CCDC77;CETN2;CHKB;COMMD1;DIABLO;EBNA1BP      |
| salmon | BP | GO:0034641 | cellular nitrogen compound metabolic pro... | 17735 | 5595  | 114 | 72  | 41.17 | 1.30E-09 | 1.748846 | BLVRA;BTFS3;BU31;CACYBP;CETN2;CHKB;COMMD1;FAU;GSTM3;GTF3C6;HDHD1;HMGN1;HNRNPA1;ISY1;N        |
| salmon | CC | GO:0043226 | organelle                                   | 17735 | 10552 | 114 | 99  | 70.54 | 1.30E-09 | 1.403459 | ARPC1A;ATP6V1E2;BTFS3;BU31;C4orf27;CACYBP;CCDC77;CETN2;COMMD1;DIABLO;EBNA1BP2;FAU;GTF3C      |
| salmon | BP | GO:0006139 | nucleobase-containing compound metabolic... | 17735 | 5209  | 114 | 69  | 38.33 | 1.40E-09 | 1.800157 | BTFS3;BU31;CACYBP;CETN2;COMMD1;FAU;GTF3C6;HDHD1;HMGN1;HNRNPA1;ISY1;MED10;NACA;NAP11;         |
| salmon | BP | GO:0019538 | protein metabolic process                   | 17735 | 3895  | 114 | 58  | 28.66 | 1.60E-09 | 2.023726 | COMMD1;EIF3H;EIF3M;FAU;HS3T3B1;ICT1;MRP56;MRP57;NACA;PARL;POLR2H;PIIA;PSMA5;PSMB6;RPL1       |
| salmon | BP | GO:0016043 | cellular component organization             | 17735 | 4124  | 114 | 60  | 30.35 | 1.60E-09 | 1.976936 | ARPC1A;ATP6V1E2;CETN2;FAU;HMGN1;ICT1;MYL12A;NAP11;NPM1;PARL;PCNA;POMP;PIIA;RAN;RPL10;R       |
| salmon | BP | GO:0046483 | heterocycle metabolic process               | 17735 | 5361  | 114 | 70  | 39.45 | 1.70E-09 | 1.774398 | BLVRA;BTFS3;BU31;CACYBP;CETN2;COMMD1;FAU;GTF3C6;HDHD1;HMGN1;HNRNPA1;ISY1;MED10;NACA;         |
| salmon | BP | GO:1901576 | organic substance biosynthetic process      | 17735 | 5154  | 114 | 68  | 37.93 | 2.80E-09 | 1.792776 | BTFS3;BU31;CACYBP;CHKB;COMMD1;EIF3H;EIF3M;FAU;GTF3C6;HMGN1;HS3T3B1;ICT1;MDH1;MED10;MF        |
| salmon | BP | GO:0042255 | ribosome assembly                           | 17735 | 19    | 114 | 6   | 0.14  | 3.50E-09 | 42.85714 | NPM1;RPS14;RPS19;RPS25;RPS6;RPSA                                                             |
| salmon | BP | GO:1901360 | organic cyclic compound metabolic proces... | 17735 | 5578  | 114 | 71  | 41.05 | 3.80E-09 | 1.729598 | BLVRA;BTFS3;BU31;CACYBP;CETN2;COMMD1;FAU;GSTM3;GTF3C6;HDHD1;HMGN1;HNRNPA1;ISY1;MED10         |
| salmon | BP | GO:0044249 | cellular biosynthetic process               | 17735 | 5073  | 114 | 67  | 37.33 | 4.20E-09 | 1.794803 | BTFS3;BU31;CACYBP;CHKB;COMMD1;EIF3H;EIF3M;FAU;GTF3C6;HMGN1;HS3T3B1;ICT1;MED10;MRP56;N        |
| salmon | BP | GO:0022618 | ribonucleoprotein complex assembly          | 17735 | 104   | 114 | 10  | 0.77  | 4.50E-09 | 12.98701 | NPM1;RPL13A;RPS14;RPS19;RPS25;RPS6;RPSA;SNRPD2;SNRPD3;SNUPN                                  |
| salmon | BP | GO:0009058 | biosynthetic process                        | 17735 | 5219  | 114 | 68  | 38.4  | 5.00E-09 | 1.770833 | BTFS3;BU31;CACYBP;CHKB;COMMD1;EIF3H;EIF3M;FAU;GTF3C6;HMGN1;HS3T3B1;ICT1;MDH1;MED10;MF        |
| salmon | BP | GO:0034654 | nucleobase-containing compound biosynthe... | 17735 | 3583  | 114 | 54  | 26.37 | 6.80E-09 | 2.047782 | BTFS3;BU31;COMMD1;FAU;GTF3C6;HMGN1;MED10;NACA;NPM1;PCNA;PER2;POLR2H;RAN;RPL10;RPL10A;        |
| salmon | BP | GO:0071826 | ribonucleoprotein complex subunit organi... | 17735 | 111   | 114 | 10  | 0.82  | 8.40E-09 | 12.19512 | NPM1;RPL13A;RPS14;RPS19;RPS25;RPS6;RPSA;SNRPD2;SNRPD3;SNUPN                                  |
| salmon | BP | GO:0006807 | nitrogen compound metabolic process         | 17735 | 5942  | 114 | 73  | 43.72 | 8.90E-09 | 1.669716 | BLVRA;BTFS3;BU31;CACYBP;CETN2;CHKB;COMMD1;FAU;GSTM3;GTF3C6;HDHD1;HMGN1;HNRNPA1;HS3T          |
| salmon | BP | GO:0019438 | aromatic compound biosynthetic process      | 17735 | 3638  | 114 | 54  | 26.77 | 1.20E-08 | 2.017183 | BTFS3;BU31;COMMD1;FAU;GTF3C6;HMGN1;MED10;NACA;NPM1;PCNA;PER2;POLR2H;RAN;RPL10;RPL10A;        |
| salmon | BP | GO:0018130 | heterocycle biosynthetic process            | 17735 | 3650  | 114 | 54  | 26.86 | 1.40E-08 | 2.010424 | BTFS3;BU31;COMMD1;FAU;GTF3C6;HMGN1;MED10;NACA;NPM1;PCNA;PER2;POLR2H;RAN;RPL10;RPL10A;        |
| salmon | BP | GO:0034660 | nRNA metabolic process                      | 17735 | 285   | 114 | 14  | 2.1   | 2.10E-08 | 6.666667 | POP4;RPL14;RPL35A;RPL5;RPS14;RPS16;RPS19;RPS21;RPS6;RPS8;RPSA;SNRPD2;SNRPD3;SNUPN            |
| salmon | BP | GO:0044260 | cellular macromolecule metabolic process    | 17735 | 6621  | 114 | 77  | 48.72 | 2.50E-08 | 1.58046  | BTFS3;BU31;CACYBP;CETN2;COMMD1;EIF3H;EIF3M;FAU;GTF3C6;HMGN1;HNRNPA1;HS3T3B1;ICT1;ISY1;N      |
| salmon | BP | GO:0044271 | cellular nitrogen compound biosynthetic ... | 17735 | 3726  | 114 | 54  | 27.42 | 2.90E-08 | 1.969365 | BTFS3;BU31;COMMD1;FAU;GTF3C6;HMGN1;MED10;NACA;NPM1;PCNA;PER2;POLR2H;RAN;RPL10;RPL10A;        |
| salmon | BP | GO:1901362 | organic cyclic compound biosynthetic pro... | 17735 | 3752  | 114 | 54  | 27.61 | 3.80E-08 | 1.955813 | BTFS3;BU31;COMMD1;FAU;GTF3C6;HMGN1;MED10;NACA;NPM1;PCNA;PER2;POLR2H;RAN;RPL10;RPL10A;        |
| salmon | MF | GO:0019843 | rRNA binding                                | 17735 | 31    | 114 | 6   | 0.21  | 4.90E-08 | 28.57143 | RPL23A;RPL37;RPL5;RPS11;RPS18;RPS4X                                                          |



|        |    |            |                                              |       |       |     |     |       |          |          |                                                                                              |
|--------|----|------------|----------------------------------------------|-------|-------|-----|-----|-------|----------|----------|----------------------------------------------------------------------------------------------|
| salmon | CC | GO:0005730 | nucleolus                                    | 17735 | 622   | 114 | 18  | 4.16  | 1.50E-07 | 4.326923 | COMMD1;EBNA1BP2;HNRNPA1;NOP16;NPM1;POLR2H;POP4;PRDX1;RPL3;RPL36;RPL4;RPL5;RPS13;RPS14;R      |
| salmon | BP | GO:0034470 | ncRNA processing                             | 17735 | 198   | 114 | 11  | 1.46  | 2.20E-07 | 7.534247 | POP4;RPL14;RPL35A;RPL5;RPS14;RPS16;RPS19;RPS21;RPS6;RPS8;RPSA                                |
| salmon | BP | GO:0044237 | cellular metabolic process                   | 17735 | 8597  | 114 | 88  | 63.26 | 2.40E-07 | 1.391084 | BLVRA;BTF3;BUD31;CACYBP;CETN2;CHK;COMMD1;EIF3H;EIF3M;FAU;GSTM3;GTF3C6;HDHD1;HMGN1;HNI        |
| salmon | MF | GO:0003676 | nucleic acid binding                         | 17735 | 3299  | 114 | 45  | 22.04 | 2.80E-07 | 2.041742 | CETN2;EIF3H;EIF3M;FAU;GTF3C6;HMGN1;HNRNPA1;ICT1;MRP5;NACA;NPM1;PCNA;POLR2H;POP4;RPL10A       |
| salmon | BP | GO:0051179 | localization                                 | 17735 | 4195  | 114 | 55  | 30.87 | 7.20E-07 | 1.781665 | ATP6V1E2;FAU;HNRNPA1;ITGB1BP1;MYL12A;NACA;NPM1;PPIA;PRDX1;RAN;RANGRF;RPL10;RPL10A;RPL12;     |
| salmon | BP | GO:0006396 | RNA processing                               | 17735 | 646   | 114 | 18  | 4.75  | 1.00E-06 | 3.789474 | HNRNPA1;ISY1;POLR2H;POP4;RPL14;RPL35A;RPL5;RPS13;RPS14;RPS16;RPS19;RPS21;RPS6;RPS8;RPSA;SNRF |
| salmon | BP | GO:0043170 | macromolecule metabolic process              | 17735 | 7334  | 114 | 78  | 53.97 | 1.70E-06 | 1.445247 | BTF3;BUD31;CACYBP;CETN2;COMMD1;EIF3H;EIF3M;FAU;GTF3C6;HMGN1;HNRNPA1;HS3ST3B1;ICT1;ISY1;V     |
| salmon | BP | GO:0008152 | metabolic process                            | 17735 | 9452  | 114 | 90  | 69.55 | 8.50E-06 | 1.294033 | BLVRA;BTF3;BUD31;CACYBP;CETN2;CHK;COMMD1;DIABLO;EIF3H;EIF3M;FAU;GSTM3;GTF3C6;HDHD1;HM        |
| salmon | BP | GO:0044238 | primary metabolic process                    | 17735 | 8755  | 114 | 85  | 64.42 | 1.70E-05 | 1.319466 | BTF3;BUD31;CACYBP;CETN2;CHK;COMMD1;EIF3H;EIF3M;FAU;GSTM3;GTF3C6;HDHD1;HMGN1;HNRNPA1;         |
| salmon | BP | GO:0071704 | organic substance metabolic process          | 17735 | 8996  | 114 | 86  | 66.2  | 2.80E-05 | 1.299094 | BLVRA;BTF3;BUD31;CACYBP;CETN2;CHK;COMMD1;EIF3H;EIF3M;FAU;GSTM3;GTF3C6;HDHD1;HMGN1;HNI        |
| salmon | BP | GO:0042273 | ribosomal large subunit biogenesis           | 17735 | 13    | 114 | 3   | 0.1   | 0.00011  | 30       | RPL14;RPL35A;RPL5                                                                            |
| salmon | BP | GO:0070925 | organelle assembly                           | 17735 | 106   | 114 | 6   | 0.78  | 0.00013  | 7.692308 | NPM1;RPS14;RPS19;RPS25;RPS6;RPSA                                                             |
| salmon | CC | GO:0044428 | nuclear part                                 | 17735 | 2482  | 114 | 32  | 16.59 | 0.00013  | 1.928873 | CACYBP;CETN2;COMMD1;EBNA1BP2;GTF3C6;HNRNPA1;ISY1;MED10;NOP16;NPM1;PCNA;POLR2H;POP4;PR        |
| salmon | BP | GO:0034622 | cellular macromolecular complex assembly     | 17735 | 547   | 114 | 13  | 4.03  | 0.00019  | 3.225806 | ARPC1A;NAP1L1;NPM1;POMP;RPL13A;RPS14;RPS19;RPS25;RPS6;RPSA;SNRPD2;SNRPD3;SNUPN               |
| salmon | CC | GO:0031974 | membrane-enclosed lumen                      | 17735 | 2770  | 114 | 34  | 18.52 | 2.00E-04 | 1.835853 | CACYBP;COMMD1;DIABLO;EBNA1BP2;GTF3C6;HNRNPA1;ICT1;MED10;MRPS16;NOP16;NPM1;PCNA;POLR2I        |
| salmon | CC | GO:0031981 | nuclear lumen                                | 17735 | 2101  | 114 | 28  | 14.05 | 0.00023  | 1.992883 | COMMD1;EBNA1BP2;GTF3C6;HNRNPA1;MED10;NOP16;NPM1;PCNA;POLR2H;POP4;PRDX1;P                     |
| salmon | MF | GO:1901363 | heterocyclic compound binding                | 17735 | 5302  | 114 | 53  | 35.43 | 0.00024  | 1.495907 | BLVRA;CETN2;CHK;EIF3H;EIF3M;FAU;GTF3C6;HMGN1;HNRNPA1;ICT1;MDH1;MRP57;NACA;NPM1;PCNA;PI       |
| salmon | MF | GO:0097159 | organic cyclic compound binding              | 17735 | 5372  | 114 | 53  | 35.9  | 0.00035  | 1.476323 | BLVRA;CETN2;CHK;EIF3H;EIF3M;FAU;GTF3C6;HMGN1;HNRNPA1;ICT1;MDH1;MRP57;NACA;NPM1;PCNA;PI       |
| salmon | CC | GO:0070013 | intracellular organelle lumen                | 17735 | 2677  | 114 | 32  | 17.9  | 0.00053  | 1.787709 | COMMD1;EBNA1BP2;GTF3C6;HNRNPA1;ICT1;MED10;MRPS16;NOP16;NPM1;PCNA;POLR2H;POP4;PRDX1;P         |
| salmon | CC | GO:0043233 | organelle lumen                              | 17735 | 2722  | 114 | 32  | 18.2  | 0.00071  | 1.758242 | COMMD1;EBNA1BP2;GTF3C6;HNRNPA1;ICT1;MED10;MRPS16;NOP16;NPM1;PCNA;POLR2H;POP4;PRDX1;P         |
| salmon | BP | GO:0051701 | interaction with host                        | 17735 | 411   | 114 | 10  | 3.02  | 0.00089  | 3.311258 | ATP6V1E2;C9orf156;HNRNPA1;NACA;NPM1;PDCL3;PPIA;PSMB6;RAN;RPS27A                              |
| salmon | CC | GO:0044464 | cell part                                    | 17735 | 14451 | 114 | 107 | 96.61 | 0.00118  | 1.107546 | ARPC1A;ATP6V1E2;BLVRA;BTF3;BUD31;C4orf27;CACYBP;CCDC77;CETN2;CHK;COMMD1;DIABLO;EBNA1BP       |
| salmon | CC | GO:0005623 | cell                                         | 17735 | 14452 | 114 | 107 | 96.62 | 0.00119  | 1.107431 | ARPC1A;ATP6V1E2;BLVRA;BTF3;BUD31;C4orf27;CACYBP;CCDC77;CETN2;CHK;COMMD1;DIABLO;EBNA1BP       |
| salmon | BP | GO:0000387 | spliceosomal snRNP assembly                  | 17735 | 31    | 114 | 3   | 0.23  | 0.00015  | 13.04348 | SNRPD2;SNRPD3;SNUPN                                                                          |
| salmon | BP | GO:0044403 | symbiosis, encompassing mutualism through... | 17735 | 445   | 114 | 10  | 3.27  | 0.00162  | 3.058104 | ATP6V1E2;C9orf156;HNRNPA1;NACA;NPM1;PDCL3;PPIA;PSMB6;RAN;RPS27A                              |
| salmon | BP | GO:0044419 | interspecies interaction between organis...  | 17735 | 445   | 114 | 10  | 3.27  | 0.00162  | 3.058104 | ATP6V1E2;C9orf156;HNRNPA1;NACA;NPM1;PDCL3;PPIA;PSMB6;RAN;RPS27A                              |
| salmon | BP | GO:0019048 | virus-host interaction                       | 17735 | 371   | 114 | 9   | 2.73  | 0.00165  | 3.296703 | C9orf156;HNRNPA1;NACA;NPM1;PDCL3;PPIA;PSMB6;RAN;RPS27A                                       |
| salmon | CC | GO:0071013 | catalytic step 2 spliceosome                 | 17735 | 79    | 114 | 4   | 0.53  | 0.00193  | 7.54717  | HNRNPA1;ISY1;SNRPD2;SNRPD3                                                                   |
| salmon | BP | GO:0051437 | positive regulation of ubiquitin-protein...  | 17735 | 72    | 114 | 4   | 0.53  | 0.00194  | 7.54717  | PSMA5;PSMB6;RPS27A;SKP1                                                                      |
| salmon | BP | GO:0006289 | nucleotide-excision repair                   | 17735 | 76    | 114 | 4   | 0.56  | 0.00237  | 7.142857 | CETN2;HMGN1;PCNA;POLR2H                                                                      |
| salmon | BP | GO:0044085 | cellular component biogenesis                | 17735 | 1686  | 114 | 23  | 12.41 | 0.00237  | 1.853344 | ARPC1A;EBNA1BP2;NAP1L1;NPM1;POMP;POP4;RPL13A;RPL14;RPL35A;RPL5;RPL7A;RPS14;RPS16;RPS18;RP    |
| salmon | BP | GO:0051439 | regulation of ubiquitin-protein ligase a...  | 17735 | 78    | 114 | 4   | 0.57  | 0.0026   | 7.017544 | PSMA5;PSMB6;RPS27A;SKP1                                                                      |
| salmon | BP | GO:0031398 | positive regulation of protein ubiquitin...  | 17735 | 133   | 114 | 5   | 0.98  | 0.003    | 5.102041 | COMMD1;PSMA5;PSMB6;RPS27A;SKP1                                                               |
| salmon | BP | GO:0051443 | positive regulation of ubiquitin-protein...  | 17735 | 82    | 114 | 4   | 0.6   | 0.00312  | 6.666667 | PSMA5;PSMB6;RPS27A;SKP1                                                                      |
| salmon | BP | GO:0031145 | anaphase-promoting complex-dependent pro...  | 17735 | 83    | 114 | 4   | 0.61  | 0.00326  | 6.557377 | PSMA5;PSMB6;RPS27A;SKP1                                                                      |
| salmon | BP | GO:0000460 | maturation of 5.8S rRNA                      | 17735 | 12    | 114 | 2   | 0.09  | 0.00337  | 22.22222 | RPS21;RPSA                                                                                   |
| salmon | BP | GO:0006417 | regulation of translation                    | 17735 | 200   | 114 | 6   | 1.47  | 0.00359  | 4.081633 | EIF3H;RPL13A;RPS14;RPS4X;RPS5;TRNAU1AP                                                       |
| salmon | MF | GO:0003729 | mRNA binding                                 | 17735 | 94    | 114 | 4   | 0.63  | 0.00362  | 6.349206 | RPS13;RPS14;RPS3;RPS5                                                                        |
| salmon | BP | GO:0051351 | positive regulation of ligase activity       | 17735 | 86    | 114 | 4   | 0.63  | 0.00371  | 6.349206 | PSMA5;PSMB6;RPS27A;SKP1                                                                      |
| salmon | BP | GO:0000084 | S phase of mitotic cell cycle                | 17735 | 140   | 114 | 5   | 1.03  | 0.00373  | 4.854369 | PCNA;PSMA5;PSMB6;RPS27A;SKP1                                                                 |
| salmon | BP | GO:0007099 | centriole replication                        | 17735 | 13    | 114 | 2   | 0.1   | 0.00397  | 20       | CETN2;NPM1                                                                                   |
| salmon | CC | GO:0005852 | eukaryotic translation initiation factor...  | 17735 | 15    | 114 | 2   | 0.1   | 0.00439  | 20       | EIF3H;EIF3M                                                                                  |
| salmon | BP | GO:0000377 | RNA splicing, via transesterification re...  | 17735 | 210   | 114 | 6   | 1.55  | 0.00456  | 3.870968 | HNRNPA1;ISY1;POLR2H;SNRPD2;SNRPD3;SNUPN                                                      |
| salmon | BP | GO:0000398 | mRNA splicing, via spliceosome               | 17735 | 210   | 114 | 6   | 1.55  | 0.00456  | 3.870968 | HNRNPA1;ISY1;POLR2H;SNRPD2;SNRPD3;SNUPN                                                      |
| salmon | BP | GO:0006283 | transcription-coupled nucleotide-excisio...  | 17735 | 46    | 114 | 3   | 0.34  | 0.00467  | 8.823529 | HMGN1;PCNA;POLR2H                                                                            |
| salmon | BP | GO:0051320 | S phase                                      | 17735 | 148   | 114 | 5   | 1.09  | 0.00473  | 4.587156 | PCNA;PSMA5;PSMB6;RPS27A;SKP1                                                                 |
| salmon | BP | GO:0000375 | RNA splicing, via transesterification re...  | 17735 | 215   | 114 | 6   | 1.58  | 0.00511  | 3.797468 | HNRNPA1;ISY1;POLR2H;SNRPD2;SNRPD3;SNUPN                                                      |
| salmon | BP | GO:0051438 | regulation of ubiquitin-protein ligase a...  | 17735 | 96    | 114 | 4   | 0.71  | 0.00548  | 5.633803 | PSMA5;PSMB6;RPS27A;SKP1                                                                      |
| salmon | BP | GO:0051340 | regulation of ligase activity                | 17735 | 100   | 114 | 4   | 0.74  | 0.00633  | 5.405405 | PSMA5;PSMB6;RPS27A;SKP1                                                                      |
| salmon | BP | GO:0019067 | viral assembly, maturation, egress, and ...  | 17735 | 18    | 114 | 2   | 0.13  | 0.0076   | 15.38462 | PPIA;RPS27A                                                                                  |
| salmon | CC | GO:0005839 | proteasome core complex                      | 17735 | 20    | 114 | 2   | 0.13  | 0.00778  | 15.38462 | PSMA5;PSMB6                                                                                  |
| salmon | CC | GO:0005634 | nucleus                                      | 17735 | 5873  | 114 | 52  | 39.26 | 0.00833  | 1.324503 | BTF3;BUD31;C4orf27;CACYBP;CETN2;COMMD1;EBNA1BP2;GTF3C6;HMGN1;HNRNPA1;ISY1;MED10;NACA;N       |
| salmon | MF | GO:0004298 | threonine-type endopeptidase activity        | 17735 | 21    | 114 | 2   | 0.14  | 0.00855  | 14.28571 | PSMA5;PSMB6                                                                                  |
| salmon | MF | GO:0070003 | threonine-type peptidase activity            | 17735 | 21    | 114 | 2   | 0.14  | 0.00855  | 14.28571 | PSMA5;PSMB6                                                                                  |
| salmon | CC | GO:0000502 | proteasome complex                           | 17735 | 65    | 114 | 3   | 0.43  | 0.00941  | 6.976744 | POMP;PSMA5;PSMB6                                                                             |
| salmon | MF | GO:0051059 | NF-kappaB binding                            | 17735 | 23    | 114 | 2   | 0.15  | 0.01021  | 13.33333 | NPM1;RPS3                                                                                    |
| salmon | CC | GO:0005844 | polysome                                     | 17735 | 23    | 114 | 2   | 0.15  | 0.01023  | 13.33333 | RPL7A;RPS4X                                                                                  |
| salmon | BP | GO:0031396 | regulation of protein ubiquitination         | 17735 | 180   | 114 | 5   | 1.32  | 0.01059  | 3.787879 | COMMD1;PSMA5;PSMB6;RPS27A;SKP1                                                               |
| salmon | CC | GO:0044429 | mitochondrial part                           | 17735 | 740   | 114 | 11  | 4.95  | 0.01062  | 2.222222 | DIABLO;ICT1;MRPS16;NDUFC2;PARL;PRDX1;SSBP1;SUCLG1;TOMM6;UQCRCF1;VDAC3                        |
| salmon | BP | GO:0008380 | RNA splicing                                 | 17735 | 328   | 114 | 7   | 2.41  | 0.01064  | 2.904564 | HNRNPA1;ISY1;POLR2H;RPS13;SNRPD2;SNRPD3;SNUPN                                                |
| salmon | CC | GO:0005689 | U12-type spliceosomal complex                | 17735 | 24    | 114 | 2   | 0.16  | 0.01111  | 12.5     | SNRPD2;SNRPD3;SNUPN                                                                          |
| salmon | CC | GO:0016460 | myosin II complex                            | 17735 | 24    | 114 | 2   | 0.16  | 0.01111  | 12.5     | MYL12A;MYL5                                                                                  |
| salmon | BP | GO:0051297 | centrosome organization                      | 17735 | 63    | 114 | 3   | 0.46  | 0.01117  | 6.521739 | CETN2;NPM1;UXT                                                                               |
| salmon | BP | GO:0009987 | cellular process                             | 17735 | 12861 | 114 | 102 | 94.64 | 0.0118   | 1.077768 | ARPC1A;ATP6V1E2;BLVRA;BTF3;BUD31;C9orf156;CACYBP;CETN2;CHK;COMMD1;DIABLO;EIF3H;EIF3M;FAL     |
| salmon | BP | GO:0090305 | nucleic acid phosphodiester bond hydroly...  | 17735 | 65    | 114 | 3   | 0.48  | 0.01216  | 6.25     | POP4;RPS21;RPSA                                                                              |
| salmon | BP | GO:0006977 | DNA damage response, signal transduction...  | 17735 | 66    | 114 | 3   | 0.49  | 0.01267  | 6.122449 | PSMA5;PSMB6;RPS27A                                                                           |
| salmon | BP | GO:0072413 | signal transduction involved in mitotic ...  | 17735 | 66    | 114 | 3   | 0.49  | 0.01267  | 6.122449 | PSMA5;PSMB6;RPS27A                                                                           |
| salmon | BP | GO:0072431 | signal transduction involved in mitotic ...  | 17735 | 66    | 114 | 3   | 0.49  | 0.01267  | 6.122449 | PSMA5;PSMB6;RPS27A                                                                           |
| salmon | BP | GO:0072474 | signal transduction involved in mitotic ...  | 17735 | 66    | 114 | 3   | 0.49  | 0.01267  | 6.122449 | PSMA5;PSMB6;RPS27A                                                                           |

|        |    |            |                                             |       |      |     |     |        |          |          |                                                                                         |
|--------|----|------------|---------------------------------------------|-------|------|-----|-----|--------|----------|----------|-----------------------------------------------------------------------------------------|
| salmon | BP | GO:0031023 | microtubule organizing center organizati... | 17735 | 67   | 114 | 3   | 0.49   | 0.0132   | 6.122449 | CETN2;NPM1;UXT                                                                          |
| salmon | BP | GO:0051436 | negative regulation of ubiquitin-protein... | 17735 | 67   | 114 | 3   | 0.49   | 0.0132   | 6.122449 | PSMA5;PSMB6;RPS27A                                                                      |
| salmon | BP | GO:0072401 | signal transduction involved in DNA inte... | 17735 | 67   | 114 | 3   | 0.49   | 0.0132   | 6.122449 | PSMA5;PSMB6;RPS27A                                                                      |
| salmon | BP | GO:0072404 | signal transduction involved in G1/S tra... | 17735 | 67   | 114 | 3   | 0.49   | 0.0132   | 6.122449 | PSMA5;PSMB6;RPS27A                                                                      |
| salmon | BP | GO:0072422 | signal transduction involved in DNA dama... | 17735 | 67   | 114 | 3   | 0.49   | 0.0132   | 6.122449 | PSMA5;PSMB6;RPS27A                                                                      |
| salmon | BP | GO:0072395 | signal transduction involved in cell cyc... | 17735 | 68   | 114 | 3   | 0.5    | 0.01374  | 6        | PSMA5;PSMB6;RPS27A                                                                      |
| salmon | MF | GO:0008135 | translation factor activity, nucleic aci... | 17735 | 79   | 114 | 3   | 0.53   | 0.01587  | 5.660377 | EIF3H;EIF3M;ICT1                                                                        |
| salmon | BP | GO:0032069 | regulation of nuclease activity             | 17735 | 72   | 114 | 3   | 0.53   | 0.016    | 5.660377 | NPM1;PCNA;SRPBB                                                                         |
| salmon | BP | GO:0051352 | negative regulation of ligase activity      | 17735 | 72   | 114 | 3   | 0.53   | 0.016    | 5.660377 | PSMA5;PSMB6;RPS27A                                                                      |
| salmon | BP | GO:0051444 | negative regulation of ubiquitin-protein... | 17735 | 72   | 114 | 3   | 0.53   | 0.016    | 5.660377 | PSMA5;PSMB6;RPS27A                                                                      |
| salmon | BP | GO:0050657 | nucleic acid transport                      | 17735 | 132  | 114 | 4   | 0.97   | 0.01632  | 4.123711 | HNRNPA1;RAN;RPSA;SNUPN                                                                  |
| salmon | BP | GO:0050658 | RNA transport                               | 17735 | 132  | 114 | 4   | 0.97   | 0.01632  | 4.123711 | HNRNPA1;RAN;RPSA;SNUPN                                                                  |
| salmon | BP | GO:0051236 | establishment of RNA localization           | 17735 | 132  | 114 | 4   | 0.97   | 0.01632  | 4.123711 | HNRNPA1;RAN;RPSA;SNUPN                                                                  |
| salmon | BP | GO:0006405 | RNA export from nucleus                     | 17735 | 73   | 114 | 3   | 0.54   | 0.0166   | 5.555556 | HNRNPA1;RAN;RPSA                                                                        |
| salmon | BP | GO:0031571 | mitotic cell cycle G1/S transition DNA d... | 17735 | 73   | 114 | 3   | 0.54   | 0.0166   | 5.555556 | PSMA5;PSMB6;RPS27A                                                                      |
| salmon | CC | GO:0005681 | spliceosomal complex                        | 17735 | 147  | 114 | 4   | 0.98   | 0.01703  | 4.081633 | HNRNPA1;ISY1;SNRPD2;SNRPD3                                                              |
| salmon | BP | GO:0002479 | antigen processing and presentation of e... | 17735 | 75   | 114 | 3   | 0.55   | 0.01784  | 5.454545 | PSMA5;PSMB6;RPS27A                                                                      |
| salmon | BP | GO:0006099 | tricarboxylic acid cycle                    | 17735 | 29   | 114 | 2   | 0.21   | 0.01914  | 9.52381  | MDH1;SUCLG1                                                                             |
| salmon | BP | GO:0006403 | RNA localization                            | 17735 | 139  | 114 | 4   | 1.02   | 0.01935  | 3.921569 | HNRNPA1;RAN;RPSA;SNUPN                                                                  |
| salmon | BP | GO:0051298 | centrosome duplication                      | 17735 | 30   | 114 | 2   | 0.22   | 0.02041  | 9.090909 | CETN2;NPM1                                                                              |
| salmon | CC | GO:0030532 | small nuclear ribonucleoprotein complex     | 17735 | 33   | 114 | 2   | 0.22   | 0.02044  | 9.090909 | SNRPD2;SNRPD3                                                                           |
| salmon | BP | GO:0042590 | antigen processing and presentation of e... | 17735 | 79   | 114 | 3   | 0.58   | 0.02046  | 5.172414 | PSMA5;PSMB6;RPS27A                                                                      |
| salmon | BP | GO:0000216 | M/G1 transition of mitotic cell cycle       | 17735 | 80   | 114 | 3   | 0.59   | 0.02114  | 5.084746 | PSMA5;PSMB6;RPS27A                                                                      |
| salmon | BP | GO:0071158 | positive regulation of cell cycle arrest    | 17735 | 80   | 114 | 3   | 0.59   | 0.02114  | 5.084746 | PSMA5;PSMB6;RPS27A                                                                      |
| salmon | BP | GO:0000082 | G1/S transition of mitotic cell cycle       | 17735 | 215  | 114 | 5   | 1.58   | 0.02128  | 3.164557 | PCNA;PSMA5;PSMB6;RPS27A;SKP1                                                            |
| salmon | BP | GO:0031575 | mitotic cell cycle G1/S transition check... | 17735 | 82   | 114 | 3   | 0.6    | 0.02255  | 5        | PSMA5;PSMB6;RPS27A                                                                      |
| salmon | CC | GO:0046930 | pore complex                                | 17735 | 91   | 114 | 3   | 0.61   | 0.0231   | 4.918033 | RAN;SNUPN;VDAC3                                                                         |
| salmon | BP | GO:0006281 | DNA repair                                  | 17735 | 388  | 114 | 7   | 2.86   | 0.02442  | 2.447552 | CETN2;HMGN1;NPM1;PCNA;POLR2H;RPS27A;RPS3                                                |
| salmon | BP | GO:0043161 | proteasomal ubiquitin-dependent protein ... | 17735 | 224  | 114 | 5   | 1.65   | 0.02487  | 3.030303 | COMMD1;PSMA5;PSMB6;RPS27A;SKP1                                                          |
| salmon | BP | GO:0006259 | DNA metabolic process                       | 17735 | 866  | 114 | 12  | 6.37   | 0.02524  | 1.88383  | CACYBP;CETN2;HMGN1;NAP1L1;NPM1;PCNA;POLR2H;PPIA;RAN;RPS27A;RPS3;SSBP1                   |
| salmon | BP | GO:0071779 | G1/S transition checkpoint                  | 17735 | 86   | 114 | 3   | 0.63   | 0.02552  | 4.761905 | PSMA5;PSMB6;RPS27A                                                                      |
| salmon | CC | GO:0042470 | melanosome                                  | 17735 | 95   | 114 | 3   | 0.64   | 0.02583  | 4.6875   | NAP1L1;PRDX1;RAN                                                                        |
| salmon | CC | GO:0048770 | pigment granule                             | 17735 | 95   | 114 | 3   | 0.64   | 0.02583  | 4.6875   | NAP1L1;PRDX1;RAN                                                                        |
| salmon | BP | GO:0015931 | nucleobase-containing compound transport    | 17735 | 154  | 114 | 4   | 1.13   | 0.02696  | 3.539823 | HNRNPA1;RAN;RPSA;SNUPN                                                                  |
| salmon | BP | GO:0010498 | proteasomal protein catabolic process       | 17735 | 234  | 114 | 5   | 1.72   | 0.02928  | 2.906977 | COMMD1;PSMA5;PSMB6;RPS27A;SKP1                                                          |
| salmon | BP | GO:0006397 | mRNA processing                             | 17735 | 405  | 114 | 7   | 2.98   | 0.0299   | 2.348993 | HNRNPA1;ISY1;POLR2H;POP4;SNRPD2;SNRPD3;SNUPN                                            |
| salmon | BP | GO:0045333 | cellular respiration                        | 17735 | 162  | 114 | 4   | 1.19   | 0.03165  | 3.361345 | MDH1;NDUFC2;SUCLG1;UQCRCF1                                                              |
| salmon | MF | GO:0003899 | DNA-directed RNA polymerase activity        | 17735 | 42   | 114 | 2   | 0.28   | 0.03201  | 7.142857 | POLR2H;ZNRD1                                                                            |
| salmon | MF | GO:0034062 | RNA polymerase activity                     | 17735 | 42   | 114 | 2   | 0.28   | 0.03201  | 7.142857 | POLR2H;ZNRD1                                                                            |
| salmon | BP | GO:0034101 | erythrocyte homeostasis                     | 17735 | 95   | 114 | 3   | 0.7    | 0.03293  | 4.285714 | PRDX1;RPS14;RPS19                                                                       |
| salmon | BP | GO:0031397 | negative regulation of protein ubiquitin... | 17735 | 96   | 114 | 3   | 0.71   | 0.03381  | 4.225352 | PSMA5;PSMB6;RPS27A                                                                      |
| salmon | BP | GO:0065003 | macromolecular complex assembly             | 17735 | 1014 | 114 | 13  | 7.46   | 0.03501  | 1.742627 | ARP1C1A;NAP1L1;NPM1;POMP;RPL13A;RPS14;RPS19;RPS25;RPS6;RPSA;SNRPD2;SNRPD3;SNUPN         |
| salmon | BP | GO:0006974 | response to DNA damage stimulus             | 17735 | 608  | 114 | 9   | 4.47   | 0.03513  | 2.013423 | CETN2;HMGN1;NPM1;PCNA;POLR2H;PSMA5;PSMB6;RPS27A;RPS3                                    |
| salmon | BP | GO:0032092 | positive regulation of protein binding      | 17735 | 41   | 114 | 2   | 0.3    | 0.03652  | 6.666667 | RAN;ZGLP1                                                                               |
| salmon | BP | GO:0002474 | antigen processing and presentation of p... | 17735 | 99   | 114 | 3   | 0.73   | 0.03654  | 4.109589 | PSMA5;PSMB6;RPS27A                                                                      |
| salmon | BP | GO:0007098 | centrosome cycle                            | 17735 | 42   | 114 | 2   | 0.31   | 0.03816  | 6.451613 | CETN2;NPM1                                                                              |
| salmon | BP | GO:0006913 | nucleocytoplasmic transport                 | 17735 | 342  | 114 | 6   | 2.52   | 0.04053  | 2.380952 | HNRNPA1;NPM1;PRDX1;RAN;RPSA;SNUPN                                                       |
| salmon | CC | GO:0043234 | protein complex                             | 17735 | 3294 | 114 | 30  | 22.02  | 0.04089  | 1.362398 | ATP6V1E2;CACYBP;CETN2;COMMD1;DIABLO;EIF3H;EIF3M;GTF3C6;MED10;MYL12A;MYL5;NACA;NDUFC2;N  |
| salmon | BP | GO:0048872 | homeostasis of number of cells              | 17735 | 176  | 114 | 4   | 1.3    | 0.04096  | 3.076923 | IL2ORB;PRDX1;RPS14;RPS19                                                                |
| salmon | BP | GO:2000045 | regulation of G1/S transition of mitotic... | 17735 | 104  | 114 | 3   | 0.77   | 0.04134  | 3.896104 | PSMA5;PSMB6;RPS27A                                                                      |
| salmon | MF | GO:0003743 | translation initiation factor activity      | 17735 | 49   | 114 | 2   | 0.33   | 0.04243  | 6.060606 | EIF3H;EIF3M                                                                             |
| salmon | BP | GO:0051169 | nuclear transport                           | 17735 | 346  | 114 | 6   | 2.55   | 0.04249  | 2.352941 | HNRNPA1;NPM1;PRDX1;RAN;RPSA;SNUPN                                                       |
| salmon | CC | GO:0005759 | mitochondrial matrix                        | 17735 | 286  | 114 | 5   | 1.91   | 0.04302  | 2.617801 | ICT1;MRPS16;PRDX1;SSBP1;SUCLG1                                                          |
| salmon | BP | GO:0000080 | G1 phase of mitotic cell cycle              | 17735 | 46   | 114 | 2   | 0.34   | 0.04502  | 5.882353 | RPS27A;SKP1                                                                             |
| salmon | BP | GO:0030330 | DNA damage response, signal transduction... | 17735 | 108  | 114 | 3   | 0.79   | 0.04539  | 3.797468 | PSMA5;PSMB6;RPS27A                                                                      |
| salmon | BP | GO:0009060 | aerobic respiration                         | 17735 | 47   | 114 | 2   | 0.35   | 0.0468   | 5.714286 | MDH1;SUCLG1                                                                             |
| salmon | BP | GO:0010608 | posttranscriptional regulation of gene e... | 17735 | 355  | 114 | 6   | 2.61   | 0.04711  | 2.298851 | EIF3H;RPL13A;RPS14;RPS4X;RPS5;TRNAU1AP                                                  |
| salmon | CC | GO:0000313 | organelle ribosome                          | 17735 | 52   | 114 | 2   | 0.35   | 0.0473   | 5.714286 | ICT1;MRPS16                                                                             |
| salmon | CC | GO:0005761 | mitochondrial ribosome                      | 17735 | 52   | 114 | 2   | 0.35   | 0.0473   | 5.714286 | ICT1;MRPS16                                                                             |
| salmon | BP | GO:0035872 | nucleotide-binding domain, leucine rich ... | 17735 | 48   | 114 | 2   | 0.35   | 0.0486   | 5.714286 | RPS27A;SUGT1                                                                            |
| salmon | BP | GO:0051318 | G1 phase                                    | 17735 | 48   | 114 | 2   | 0.35   | 0.0486   | 5.714286 | RPS27A;SKP1                                                                             |
| salmon | CC | GO:0031967 | organelle envelope                          | 17735 | 825  | 114 | 10  | 5.52   | 0.04943  | 1.811594 | CACYBP;DIABLO;NDUFC2;PARL;RAN;SNUPN;SUCLG1;TOMM6;UQCRCF1;VDAC3                          |
| red    | BP | GO:0023052 | signaling                                   | 17735 | 4666 | 466 | 176 | 127.07 | 1.30E-07 | 1.385063 | ACSL1;ADAM17;ADM;AGFG1;AGPAT9;AGTPBP1;ALDH1A2;ANKRD6;AP3B2;APAF1;APBB2;APH1B;ARHGAP15   |
| red    | BP | GO:0044700 | single organism signaling                   | 17735 | 4666 | 466 | 176 | 127.07 | 1.30E-07 | 1.385063 | ACSL1;ADAM17;ADM;AGFG1;AGPAT9;AGTPBP1;ALDH1A2;ANKRD6;AP3B2;APAF1;APBB2;APH1B;ARHGAP15   |
| red    | BP | GO:0007165 | signal transduction                         | 17735 | 4165 | 466 | 159 | 113.43 | 4.10E-07 | 1.401746 | ACSL1;ADAM17;ADM;AGFG1;AGPAT9;ALDH1A2;ANKRD6;APAF1;APBB2;APH1B;ARHGAP19;ARHGFE19;ARL1   |
| red    | BP | GO:0007154 | cell communication                          | 17735 | 4775 | 466 | 177 | 130.04 | 4.10E-07 | 1.36112  | ACSL1;ADAM17;ADM;AGFG1;AGPAT9;AGTPBP1;ALDH1A2;ANKRD6;AP3B2;APAF1;APBB2;APH1B;ARHGAP15   |
| red    | BP | GO:0050896 | response to stimulus                        | 17735 | 6581 | 466 | 225 | 179.22 | 1.90E-06 | 1.25544  | ACSL1;ADAM17;ADM;AGFG1;AGPAT9;AGTPBP1;ALDH1A2;ALOX5;ALOX5AP;ANKRD6;ANXA3;APAF1;APBB2;   |
| red    | BP | GO:0009611 | response to wounding                        | 17735 | 1090 | 466 | 56  | 29.68  | 2.90E-06 | 1.886792 | ADAM17;ADM;ALOX5;ALOX5AP;ARHGFE19;C3AR1;CCR1;CCR2;CD177;CD55;CD59;CR1;CXCR1;CYBB;DOCK1; |
| red    | MF | GO:0019864 | IgG binding                                 | 17735 | 10   | 466 | 5   | 0.27   | 3.00E-06 | 18.51852 | FCGR1A;FCGR1B;FCGR2A;FCGR3B                                                             |

|     |    |            |                                              |       |       |     |     |        |          |          |                                                                                                |
|-----|----|------------|----------------------------------------------|-------|-------|-----|-----|--------|----------|----------|------------------------------------------------------------------------------------------------|
| red | BP | GO:0002376 | immune system process                        | 17735 | 1816  | 466 | 80  | 49.46  | 7.30E-06 | 1.617469 | ADAM17;ANXA3;APOBEC3A;AQP9;BCL2L11;BST1;C3AR1;CCR1;CCR2;CD177;CD55;CD59;CR1;CST7;CXCR1;CY      |
| red | BP | GO:0051716 | cellular response to stimulus                | 17735 | 5052  | 466 | 179 | 137.58 | 8.40E-06 | 1.301061 | ACSL1;ADAM17;ADM;AGFG1;AGPAT9;ALDH1A2;ALOX5AP;ANKRD6;APAF1;APBB2;APH1B;APOBEC3A;AQP9           |
| red | BP | GO:0006952 | defense response                             | 17735 | 1119  | 466 | 54  | 30.47  | 2.60E-05 | 1.772235 | ALOX5;ALOX5AP;ANXA3;APAF1;APOBEC3A;C3AR1;CACNA1E;CCR1;CCR2;CD55;CD59;CLEC1A;C3AR1;CXCR1;CY     |
| red | CC | GO:0016020 | membrane                                     | 17735 | 7690  | 466 | 245 | 202.89 | 2.90E-05 | 1.207551 | ACPP;ACSL1;ADAM17;AGFG1;AGPAT9;AHCTF1;ALOX5AP;ANTXR2;ANXA3;AP3B2;APBB2;APH1B;AQP               |
| red | BP | GO:0006954 | inflammatory response                        | 17735 | 489   | 466 | 30  | 13.32  | 3.00E-05 | 2.252252 | ALOX5;ALOX5AP;C3AR1;CCR1;CCR2;CD55;CD59;CR1;CXCR1;CYBB;FCGR1A;FPR2;HIF1A;HP;IL10RB;IL18RAP;I   |
| red | MF | GO:0005515 | protein binding                              | 17735 | 7306  | 466 | 235 | 195.28 | 3.70E-05 | 1.2034   | ACPP;ACTR2;ADAM17;ADM;AGFG1;AGTPBP1;ALOX5;ALOX5AP;ANTXR2;APAF1;APBB2;APH1B;APOA1B;AP           |
| red | BP | GO:0019221 | cytokine-mediated signaling pathway          | 17735 | 335   | 466 | 23  | 9.12   | 4.70E-05 | 2.52193  | ACSL1;CCR1;CCR2;COMMD7;CXCR1;FCGR1A;FCGR1B;GPR17;HIF1A;IFNAR1;IFNGR2;IL1B;IL1R1;IL1LRN;IRAK3;  |
| red | MF | GO:0004896 | cytokine receptor activity                   | 17735 | 81    | 466 | 10  | 2.17   | 5.80E-05 | 4.608295 | CCR1;CCR2;CXCR1;GPR17;IFNAR1;IFNGR2;IL10RB;IL13RA1;IL1R1;IL1R2                                 |
| red | BP | GO:0010563 | negative regulation of phosphorus metabo...  | 17735 | 254   | 466 | 19  | 6.92   | 7.00E-05 | 2.745665 | ATXN1;ATXN7;CCR2;CDA;DNAJC3;GNAQ;GSK3B;HMGCGR;IL1B;IQGAP1;IRAK3;LYN;PAK2;PDZD3;PPAP2B;RHO      |
| red | BP | GO:0045936 | negative regulation of phosphate metabol...  | 17735 | 254   | 466 | 19  | 6.92   | 7.00E-05 | 2.745665 | ATXN1;ATXN7;CCR2;CDA;DNAJC3;GNAQ;GSK3B;HMGCGR;IL1B;IQGAP1;IRAK3;LYN;PAK2;PDZD3;PPAP2B;RHO      |
| red | MF | GO:0019865 | immunoglobulin binding                       | 17735 | 18    | 466 | 5   | 0.48   | 8.60E-05 | 10.41667 | FCGR1A;FCGR1B;FCGR1C;FCGR2A;FCGR3B                                                             |
| red | BP | GO:0009605 | response to external stimulus                | 17735 | 1238  | 466 | 56  | 33.71  | 0.00011  | 1.661228 | ACSL1;ADAM17;ADM;ALDH1A2;ALOX5AP;AR5B;BEST1;C3AR1;CASP5;CBS;CCR1;CCR2;CD55;CD59;CHRNA10;       |
| red | BP | GO:0080134 | regulation of response to stress             | 17735 | 737   | 466 | 38  | 20.07  | 0.00012  | 1.893373 | ALOX5AP;CBS;CCR2;CD55;CD59;CR1;FCGR1A;HMGCGR;HP;HPSE;IFNAR1;IFNGR2;IL1B;IL1LRN;IRAK3;LYN;NFE2I |
| red | BP | GO:0017345 | cellular response to cytokine stimulus       | 17735 | 412   | 466 | 25  | 11.22  | 0.00016  | 2.228164 | ACSL1;CCR1;CCR2;COMMD7;CXCR1;FCGR1A;FCGR1B;GPR17;HIF1A;IFNAR1;IFNGR2;IL1B;IL1R1;IL1LRN;IRAK3;  |
| red | BP | GO:0002526 | acute inflammatory response                  | 17735 | 109   | 466 | 11  | 2.97   | 0.00019  | 3.703704 | ALOX5AP;CD55;CD59;CR1;FCGR1A;HP;IL1B;IL1LRN;ORM1;ORM2;OSM                                      |
| red | CC | GO:0044459 | plasma membrane part                         | 17735 | 1895  | 466 | 75  | 50     | 0.00021  | 1.5      | ADAM17;AQP9;ATP6V1A;ATP7B;BEST1;BMX;C3AR1;CA4;CACNA1E;CCR1;CCR2;CD55;CD59;CDH2;CDKL5;CE        |
| red | BP | GO:0035556 | intracellular signal transduction            | 17735 | 1936  | 466 | 78  | 52.72  | 0.00021  | 1.479514 | ADAM17;ADM;AGFG1;AGPAT9;APAF1;APBB2;ARHGAP19;ARHGFEF19;ARL11;ARL40;ASAP1;BCL2L11;BMX;CB        |
| red | CC | GO:0071944 | cell periphery                               | 17735 | 4360  | 466 | 148 | 115.03 | 0.00025  | 1.286621 | ACPP;ACSL1;ADAM17;ANTXR2;ANXA3;APH1B;AQP9;ARL4D;ATP11A;ATP6V1A;ATP7B;BCL2L11;BEST1;BMX;E       |
| red | BP | GO:0032103 | positive regulation of response to exter...  | 17735 | 153   | 466 | 13  | 4.17   | 0.00028  | 3.117506 | ADAM17;ALOX5AP;C3AR1;CCR1;CCR2;FCGR1A;IL1B;OSM;SCAR1;TLR2;TLR4;TNFRSF1A;WAC                    |
| red | BP | GO:0006955 | immune response                              | 17735 | 1081  | 466 | 49  | 29.44  | 0.00029  | 1.664402 | ADAM17;ANXA3;APOBEC3A;AQP9;BST1;CCR1;CCR2;CD55;CD59;CR1;CST7;CYBB;FCGR1A;FCGR1B;FCGR3B;F       |
| red | CC | GO:0005886 | plasma membrane                              | 17735 | 4273  | 466 | 145 | 112.74 | 3.00E-04 | 1.286145 | ACPP;ACSL1;ADAM17;ANTXR2;ANXA3;APH1B;AQP9;ARL4D;ATP11A;ATP6V1A;ATP7B;BCL2L11;BEST1;BMX;E       |
| red | BP | GO:0032101 | regulation of response to external stimu...  | 17735 | 380   | 466 | 23  | 10.35  | 0.00031  | 2.222222 | ADAM17;ALOX5AP;C3AR1;CCR1;CCR2;CD55;CD59;CR1;FCGR1A;HMGCGR;HPSE;IL1B;LYN;NFE2L2;OSM;PLAU;      |
| red | BP | GO:0006950 | response to stress                           | 17735 | 2926  | 466 | 108 | 79.68  | 0.00032  | 1.355422 | ADAM17;ADM;ALOX5;ALOX5AP;ANXA3;APAF1;APOBEC3A;AQP9;ARHGFEF19;ATF6;AVIL;BCL2L11;BMX;C3AR        |
| red | BP | GO:0010573 | vascular endothelial growth factor produ...  | 17735 | 23    | 466 | 5   | 0.63   | 0.00033  | 7.936508 | C3AR1;CCR2;HIF1A;HPSE;IL1B                                                                     |
| red | BP | GO:0010574 | regulation of vascular endothelial growth... | 17735 | 23    | 466 | 5   | 0.63   | 0.00033  | 7.936508 | C3AR1;CCR2;HIF1A;HPSE;IL1B                                                                     |
| red | BP | GO:0048583 | regulation of response to stimulus           | 17735 | 2347  | 466 | 90  | 63.92  | 0.00034  | 1.40801  | ADAM17;ADM;AGFG1;AGPAT9;ALOX5AP;ANKRD6;ARHGAP19;ARHGFEF19;ASAP1;ATXN1;ATXN7;BCL2L11;C3         |
| red | BP | GO:0044763 | single-organism cellular process             | 17735 | 9577  | 466 | 292 | 260.81 | 0.00039  | 1.119589 | ACSL1;ACTR2;ADAM17;ADM;AGFG1;AGPAT9;AGTPBP1;AHCTF1;ALDH1A2;ALOX5AP;ANKRD6;ANXA3;AP3B2          |
| red | BP | GO:0071310 | cellular response to organic substance       | 17735 | 1333  | 466 | 57  | 36.3   | 4.00E-04 | 1.570248 | ACSL1;ADAM17;ALDH1A2;AQP9;ATF6;ATP6V1A;CACNA1E;CCR1;CCR2;COMMD7;CXCR1;DGAT2;DNAJB11;DI         |
| red | CC | GO:0044425 | membrane part                                | 17735 | 6026  | 466 | 193 | 158.99 | 0.00044  | 1.213913 | ACPP;ACSL1;ADAM17;AGFG1;AGPAT9;AHCTF1;ALOX5AP;ANTXR2;AP3B2;APH1B;AQP9;ARMCX6;ASTN2;ATF         |
| red | BP | GO:0070887 | cellular response to chemical stimulus       | 17735 | 1709  | 466 | 69  | 46.54  | 0.00048  | 1.482596 | ACSL1;ADAM17;ALDH1A2;ALOX5AP;APOBEC3A;AQP9;ATF6;ATP6V1A;C3AR1;CACNA1E;CBS;CXCR1;CCR2;C         |
| red | CC | GO:0016023 | cytoplasmic membrane-bounded vesicle         | 17735 | 848   | 466 | 39  | 22.37  | 0.00054  | 1.743406 | ACPP;ACSL1;ANXA3;AP3B2;APH1B;ATP7B;CA4;CT4;CYBB;DMXL2;F5;FCGR1A;FCGR1B;FLOT1;GABARAPL1;G       |
| red | BP | GO:0002673 | regulation of acute inflammatory respons...  | 17735 | 53    | 466 | 7   | 1.44   | 0.00055  | 4.861111 | ALOX5AP;CD55;CD59;CR1;FCGR1A;IL1B;OSM                                                          |
| red | BP | GO:0002698 | negative regulation of immune effector p...  | 17735 | 53    | 466 | 7   | 1.44   | 0.00055  | 4.861111 | CCR2;CD55;CD59;CR1;IRAK3;PGLYRP1;TARBP2                                                        |
| red | BP | GO:0050729 | positive regulation of inflammatory resp...  | 17735 | 70    | 466 | 8   | 1.91   | 0.00061  | 4.188482 | ALOX5AP;CCR2;FCGR1A;IL1B;OSM;TLR2;TLR4;TNFRSF1A                                                |
| red | BP | GO:0031347 | regulation of defense response               | 17735 | 428   | 466 | 24  | 11.66  | 0.00069  | 2.058319 | ALOX5AP;CCR2;CD55;CD59;CR1;FCGR1A;IFNAR1;IFNGR2;IL1B;IRAK3;LYN;OSM;PAK2;PELI2;PIAS1;PVRL2;S    |
| red | BP | GO:0042326 | negative regulation of phosphorylation       | 17735 | 212   | 466 | 15  | 5.77   | 0.00071  | 2.599653 | ATXN1;ATXN7;DNAJC3;GNAQ;GSK3B;HMGCGR;IL1B;IRAK3;LYN;PAK2;PPAP2B;RHOH;SOCS3;TARBP2;TRIB1        |
| red | BP | GO:0050727 | regulation of inflammatory response          | 17735 | 191   | 466 | 14  | 5.2    | 0.00075  | 2.692308 | ALOX5AP;CCR2;CD55;CD59;CR1;FCGR1A;IL1B;LYN;OSM;SNO2;TLR2;TLR4;TNFRSF1A;ZFP36                   |
| red | BP | GO:0070098 | chemokine-mediated signaling pathway         | 17735 | 29    | 466 | 5   | 0.79   | 0.00101  | 6.329114 | CCR1;CCR2;CXCR1;GPR17;HIF1A                                                                    |
| red | MF | GO:0000287 | magnesium ion binding                        | 17735 | 180   | 466 | 13  | 4.81   | 0.0011   | 2.702703 | ATP11A;ATP9A;DCTPP1;ENO3;IDH1;IRAK3;NUDT5;PIF1;SRPK1;SRPK2;STK3;TGM3;ZAK                       |
| red | BP | GO:0034097 | response to cytokine stimulus                | 17735 | 497   | 466 | 26  | 13.53  | 0.00116  | 1.921656 | ACSL1;ALDH1A2;CCR1;CCR2;COMMD7;CXCR1;FCGR1A;FCGR1B;GPR17;HIF1A;IFNAR1;IFNGR2;IL1B;IL1R1;IL1    |
| red | BP | GO:0032722 | positive regulation of chemokine product...  | 17735 | 30    | 466 | 5   | 0.82   | 0.00119  | 6.097561 | ADAM17;HIF1A;IL1B;TLR2;TLR4                                                                    |
| red | CC | GO:0045177 | apical part of cell                          | 17735 | 279   | 466 | 17  | 7.36   | 0.00124  | 2.309783 | ACPP;ADAM17;ATP6V1A;CA4;CD55;GPSM2;INSC;KCNE1;PDZD3;PLB1;RAB27A;SHROOM4;SLC22A4;STX3;TRI       |
| red | CC | GO:0031226 | intrinsic to plasma membrane                 | 17735 | 1252  | 466 | 51  | 33.03  | 0.00128  | 1.544051 | ADAM17;AQP9;ATP6V1A;ATP7B;C3AR1;CA4;CCR1;CCR2;CD55;CD59;CEACAM4;CLEC1A;C3AR1;CYBB;EBP;ENTP     |
| red | BP | GO:0023051 | regulation of signaling                      | 17735 | 2036  | 466 | 77  | 55.45  | 0.00149  | 1.388638 | ADAM17;ADM;AGFG1;AGPAT9;ANKRD6;ARHGAP19;ARHGFEF19;ASAP1;ATXN1;ATXN7;BCL2L11;CACNA1E;CB         |
| red | MF | GO:0004693 | cyclin-dependent protein kinase activity     | 17735 | 32    | 466 | 5   | 0.86   | 0.0015   | 5.813953 | CDK14;CDK19;CDK4;CDK5;CDK7;CDK8;CDK9                                                           |
| red | BP | GO:0002262 | myeloid cell homeostasis                     | 17735 | 19    | 466 | 4   | 0.52   | 0.00152  | 7.692308 | ADAM17;BCL2L11;HICAR2;PDE4B                                                                    |
| red | BP | GO:0010575 | positive regulation vascular endothelial...  | 17735 | 19    | 466 | 4   | 0.52   | 0.00152  | 7.692308 | C3AR1;HIF1A;HPSE;IL1B                                                                          |
| red | BP | GO:0007166 | cell surface receptor signaling pathway      | 17735 | 2331  | 466 | 86  | 63.48  | 0.00158  | 1.354757 | ACSL1;ADAM17;ADM;ANKRD6;APH1B;ATP6V1A;ATXN1;ATXN7;BCL2L11;C3AR1;CCR1;CCR2;CD59;CDA;CDH         |
| red | BP | GO:0051262 | protein tetramerization                      | 17735 | 81    | 466 | 8   | 2.21   | 0.0016   | 3.61991  | APOA1BP;CDA;DCTPP1;HMGCGR;SBF2;SOD2;TGM3;TRPV5                                                 |
| red | BP | GO:0010646 | regulation of cell communication             | 17735 | 2042  | 466 | 77  | 55.61  | 0.00162  | 1.386463 | ADAM17;ADM;AGFG1;AGPAT9;ANKRD6;ARHGAP19;ARHGFEF19;ASAP1;ATXN1;ATXN7;BCL2L11;CACNA1E;CB         |
| red | CC | GO:0005887 | integral to plasma membrane                  | 17735 | 1208  | 466 | 49  | 31.87  | 0.00174  | 1.537496 | ADAM17;AQP9;ATP6V1A;ATP7B;C3AR1;CCR1;CCR2;CD55;CEACAM4;CLEC1A;C3AR1;CYBB;EBP;ENTPD1;FFAR2;     |
| red | BP | GO:0005007 | biological regulation                        | 17735 | 8616  | 466 | 263 | 234.64 | 0.00177  | 1.120866 | ACSL1;ADAM17;ADM;AGFG1;AGPAT9;AGTPBP1;ALDH1A2;ALOX5AP;ANKRD6;ANXA3;APAF1;APBB2;APH1B;          |
| red | CC | GO:0031988 | membrane-bounded vesicle                     | 17735 | 905   | 466 | 39  | 23.88  | 0.0018   | 1.633166 | ACPP;AGFG1;ANXA3;AP3B2;APH1B;ATP7B;CA4;CT4;CYBB;DMXL2;F5;FCGR1A;FCGR1B;FLOT1;GABARAPL1;G       |
| red | MF | GO:0005488 | binding                                      | 17735 | 11799 | 466 | 339 | 315.37 | 0.0018   | 1.074928 | ACPP;ACSL1;ACTR2;ADAM17;ADAMTSL5;ADM;AGFG1;AGTPBP1;AHCTF1;ALDH1A2;ALOX5;ALOX5AP;ANTXR          |
| red | BP | GO:0007243 | intracellular protein kinase cascade         | 17735 | 879   | 466 | 39  | 23.94  | 0.00181  | 1.629073 | ADAM17;CBS;CCR1;CCR2;CDH2;DOK4;FGF13;FPR1;FYB;GPR89A;GSK3B;HMGCGR;HPSE;IFNAR1;IL1B;IL1LRN;IR   |
| red | BP | GO:0009966 | regulation of signal transduction            | 17735 | 1795  | 466 | 69  | 48.88  | 0.00181  | 1.41162  | ADAM17;ADM;AGFG1;AGPAT9;ANKRD6;ARHGAP19;ARHGFEF19;ASAP1;ATXN1;ATXN7;BCL2L11;CBS;CCR1;CC        |
| red | BP | GO:0032757 | positive regulation of interleukin-8 pro...  | 17735 | 20    | 466 | 4   | 0.54   | 0.00186  | 7.407407 | IL1B;TLR2;TLR4;TLR5                                                                            |
| red | CC | GO:0042581 | specific granule                             | 17735 | 10    | 466 | 3   | 0.26   | 0.00191  | 11.53846 | ANXA3;SNAP23;STX3                                                                              |
| red | CC | GO:0031224 | intrinsic to membrane                        | 17735 | 5319  | 466 | 169 | 140.33 | 0.002    | 1.204304 | ACPP;ACSL1;ADAM17;AGFG1;AGPAT9;AHCTF1;ALOX5AP;ANTXR2;APH1B;AQP9;ARMCX6;ASTN2;ATF6;ATP1         |
| red | BP | GO:0005008 | regulation of biological quality             | 17735 | 2547  | 466 | 92  | 69.36  | 0.00202  | 1.326413 | ADAM17;ADM;AGTPBP1;ALDH1A2;AQP9;ARPC5;ARPC5L;ATP11A;ATP6V1A;ATP7B;ATP9A;ATXN1;AVIL;BCL2        |
| red | BP | GO:0010935 | regulation of macrophage cytokine produc...  | 17735 | 10    | 466 | 3   | 0.27   | 0.00209  | 11.11111 | IRAK3;TLR2;TLR4                                                                                |
| red | BP | GO:0042535 | positive regulation of tumor necrosis fa...  | 17735 | 10    | 466 | 3   | 0.27   | 0.00209  | 11.11111 | CCR2;TLR2;TLR4                                                                                 |
| red | MF | GO:0005484 | SNAP receptor activity                       | 17735 | 21    | 466 | 4   | 0.56   | 0.0021   | 7.142857 | STX11;STX12;STX3;STX6                                                                          |
| red | CC | GO:0005794 | Golgi apparatus                              | 17735 | 1158  | 466 | 47  | 30.55  | 0.00213  | 1.538462 | ACPP;AGFG1;AP3B2;APAF1;AR5B;ATF6;ATP2C2;ATP7B;ATP9A;BEND5;CA4;CAPN8;CUL3;EXT1;GABARAPL1;G      |
| red | CC | GO:0031410 | cytoplasmic vesicle                          | 17735 | 914   | 466 | 39  | 24.11  | 0.00215  | 1.617586 | ACPP;AGFG1;ANXA3;AP3B2;APH1B;ATP7B;CA4;CT4;CYBB;DMXL2;F5;FCGR1A;FCGR1B;FLOT1;GABARAPL1;G       |
| red | BP | GO:1901701 | cellular response to oxygen-containing c...  | 17735 | 387   | 466 | 21  | 10.54  | 0.00218  | 1.99241  | ALDH1A2;AQP9;CACNA1E;DGAT2;HIF1A;HMGCGR;HP;IL1B;IFNAR1;LYN;NFE2L2;PDE4B;PKD3;SLC8A1;SOD2;TLR   |
| red | BP | GO:0042346 | positive regulation of NF-kappaB import ...  | 17735 | 21    | 466 | 4   | 0.57   | 0.00224  | 7.017544 | IL1B;TLR2;TLR4;TNFSF14                                                                         |
| red | BP | GO:0012505 | endomembrane system                          | 17735 | 1768  | 466 | 66  | 46.65  | 0.00233  | 1.414791 | ACSL1;AGFG1;AGPAT9;AHCTF1;ALOX5;ALOX5AP;ANTXR2;ANXA3;AP3B2;ATF6;ATP2C2;ATP7B;BCL2L11;CA4;      |
| red | CC | GO:0006469 | negative regulation of protein kinase ac...  | 17735 | 148   | 466 | 11  | 4.03   | 0.00242  | 2.729529 | DNAJC3;GNAQ;GSK3B;HMGCGR;IL1B;IRAK3;LYN;PAK2;SOCS3;TARBP2;TRIB1                                |

|     |    |            |                                               |       |       |     |     |        |         |          |                                                                                          |                                             |
|-----|----|------------|-----------------------------------------------|-------|-------|-----|-----|--------|---------|----------|------------------------------------------------------------------------------------------|---------------------------------------------|
| red | BP | GO:0051348 | negative regulation of transferase activ...   | 17735 | 170   | 466 | 12  | 4.63   | 0.00242 | 2.591793 | DNAJC3;GNAQ;GSK3B;HMGC                                                                   | IL1B;IRAK3;LYN;PAK2;PIF1;SOCS3;TARBP2;TRIB1 |
| red | BP | GO:0002697 | regulation of immune effector process         | 17735 | 217   | 466 | 14  | 5.91   | 0.00253 | 2.368866 | CCR2;CD55;CD59;CR1;FCGR1A;IL1B;IRAK3;LYN;PAK2;PGLYR1;PVRL2;TARBP2;TLR2;TLR4              |                                             |
| red | BP | GO:0002675 | positive regulation of acute inflammator...   | 17735 | 22    | 466 | 4   | 0.6    | 0.00269 | 6.666667 | ALOX5AP;FCGR1A;IL1B;OSM                                                                  |                                             |
| red | MF | GO:0019956 | chemokine binding                             | 17735 | 11    | 466 | 3   | 0.29   | 0.0027  | 10.34483 | CCR1;CXCR1;ZFP36                                                                         |                                             |
| red | MF | GO:0036041 | long-chain fatty acid binding                 | 17735 | 11    | 466 | 3   | 0.29   | 0.0027  | 10.34483 | ALOX5AP;OXER1;STX3                                                                       |                                             |
| red | CC | GO:0005737 | cytoplasm                                     | 17735 | 9016  | 466 | 267 | 237.87 | 0.00272 | 1.122462 | ACPP;ACSL1;ACTR2;ADAM17;ADM;AGFG1;AGPAT9;AGTPBP1;AHCTF1;AKR7A3;ALDH1A2;ALOX5;ALOX5AP;A   |                                             |
| red | BP | GO:0031663 | lipopolysaccharide-mediated signaling pa...   | 17735 | 36    | 466 | 5   | 0.98   | 0.00275 | 5.102041 | IL1B;LYN;TLR2;TLR4;TRIB1                                                                 |                                             |
| red | BP | GO:0042345 | regulation of NF-kappaB import into nucl...   | 17735 | 36    | 466 | 5   | 0.98   | 0.00275 | 5.102041 | IL1B;LITAF;TLR2;TLR4;TNFSF14                                                             |                                             |
| red | BP | GO:0042348 | NF-kappaB import into nucleus                 | 17735 | 36    | 466 | 5   | 0.98   | 0.00275 | 5.102041 | IL1B;LITAF;TLR2;TLR4;TNFSF14                                                             |                                             |
| red | CC | GO:0030426 | growth cone                                   | 17735 | 91    | 466 | 8   | 2.4    | 0.00277 | 3.333333 | APBB2;CDKL5;FGF13;GSK3B;MYO5A;STX3;TIAM2;TSHZ3                                           |                                             |
| red | BP | GO:0050777 | negative regulation of immune response        | 17735 | 52    | 466 | 6   | 1.42   | 0.00278 | 4.225352 | CCR2;CD55;CD59;CR1;IRAK3;LYN                                                             |                                             |
| red | BP | GO:0010934 | macrophage cytokine production                | 17735 | 11    | 466 | 3   | 0.3    | 0.00281 | 10       | IRAK3;TLR2;TLR4                                                                          |                                             |
| red | BP | GO:0044273 | sulfur compound catabolic process             | 17735 | 37    | 466 | 5   | 1.01   | 0.00311 | 4.950495 | ARSB;CBS;HPSE;IDS;SQRLD                                                                  |                                             |
| red | BP | GO:0044710 | single-organism metabolic process             | 17735 | 3059  | 466 | 106 | 83.31  | 0.00339 | 1.272356 | ACPP;ACSL1;ADM;AGFG1;AGPAT9;AKR7A3;ALDH1A2;ALOX5;ALOX5AP;APOBEC3A;ARHGEF19;ARL4D;ARSB;A  |                                             |
| red | CC | GO:0016021 | integral to membrane                          | 17735 | 5202  | 466 | 164 | 137.25 | 0.00347 | 1.1949   | ACPP;ACSL1;ADAM17;AGFG1;AGPAT9;AHCTF1;ALOX5AP;ANTXR2;APH1B;AQP9;ARMCX6;ASTN2;ATF6;ATP1   |                                             |
| red | MF | GO:0008289 | lipid binding                                 | 17735 | 721   | 466 | 32  | 19.27  | 0.0035  | 1.660612 | ALDH1A2;ALOX5AP;ANXA3;ARHGEF19;ASAP1;ATP5G1;BMX;CYTH4;DOK4;FFAR2;FFAR3;LYN;MYO10;NCF4;O  |                                             |
| red | CC | GO:0030427 | site of polarized growth                      | 17735 | 95    | 466 | 8   | 2.51   | 0.00362 | 3.187251 | APBB2;CDKL5;FGF13;GSK3B;MYO5A;STX3;TIAM2;TSHZ3                                           |                                             |
| red | BP | GO:0006796 | phosphate-containing compound metabolic ...   | 17735 | 2466  | 466 | 88  | 67.16  | 0.00368 | 1.310304 | ACPP;ACSL1;ADAM17;ADM;AGFG1;AGPAT9;ARHGEF19;ARL4D;ARSB;ASAP1;ATF6;ATP2C2;ATP5G1;ATP7B;A  |                                             |
| red | BP | GO:0042221 | response to chemical stimulus                 | 17735 | 2766  | 466 | 97  | 75.33  | 0.00373 | 1.287668 | ACSL1;ADAM17;ADM;ALDH1A2;ALOX5AP;APOBEC3A;AQP9;ARSB;ATF6;ATP6V1A;ATP7B;C3AR1;CA4;CALCNA  |                                             |
| red | BP | GO:0015893 | drug transport                                | 17735 | 24    | 466 | 4   | 0.65   | 0.00374 | 6.153846 | EBP;LYN;SLC22A1;TLR2                                                                     |                                             |
| red | BP | GO:0006144 | purine nucleobase metabolic process           | 17735 | 39    | 466 | 5   | 1.06   | 0.00392 | 4.716981 | ACPP;DPYD;GMPR2;NT5C2;PNP                                                                |                                             |
| red | BP | GO:0001776 | leukocyte homeostasis                         | 17735 | 56    | 466 | 6   | 1.53   | 0.00404 | 3.921569 | BCL2L11;HICAR2;HIF1A;LYN;PDE4B;TNFSF14                                                   |                                             |
| red | BP | GO:0071260 | cellular response to mechanical stimulus      | 17735 | 56    | 466 | 6   | 1.53   | 0.00404 | 3.921569 | CASP5;IL1B;TLR4;TLR5;TNFRSF1A;TNFSF14                                                    |                                             |
| red | BP | GO:0009316 | positive regulation of intracellular pro...   | 17735 | 94    | 466 | 8   | 2.56   | 0.00408 | 3.125    | GSK3B;IL1B;KPN1;TLR2;TLR4;TNFRSF1A;TNFSF14;WIPF1                                         |                                             |
| red | MF | GO:0001637 | G-protein coupled chemoattractant recept...   | 17735 | 25    | 466 | 4   | 0.67   | 0.0041  | 5.970149 | CCR1;CCR2;CXCR1;GPR17                                                                    |                                             |
| red | MF | GO:0004950 | chemokine receptor activity                   | 17735 | 25    | 466 | 4   | 0.67   | 0.0041  | 5.970149 | CCR1;CCR2;CXCR1;GPR17                                                                    |                                             |
| red | BP | GO:0033673 | negative regulation of kinase activity        | 17735 | 159   | 466 | 11  | 4.33   | 0.00421 | 2.540416 | DNAJC3;GNAQ;GSK3B;HMGC                                                                   |                                             |
| red | CC | GO:0016324 | apical plasma membrane                        | 17735 | 212   | 466 | 13  | 5.59   | 0.00423 | 2.325581 | ADAM17;ATP6V1A;CA4;CD55;KCNE1;PLB1;RAB27A;SHROOM4;SLC22A4;STX3;TRPM6;TRPV5;VAMP3         |                                             |
| red | BP | GO:0006793 | phosphorus metabolic process                  | 17735 | 2513  | 466 | 89  | 68.44  | 0.00431 | 1.300409 | ACPP;ACSL1;ADAM17;ADM;AGFG1;AGPAT9;ARHGEF19;ARL4D;ARSB;ASAP1;ATF6;ATP2C2;ATP5G1;ATP7B;A  |                                             |
| red | BP | GO:0002532 | production of molecular mediator involv...    | 17735 | 25    | 466 | 4   | 0.68   | 0.00435 | 5.882353 | ALOX5;ALOX5AP;LYN;TLR4                                                                   |                                             |
| red | BP | GO:0044699 | single-organism process                       | 17735 | 10656 | 466 | 313 | 290.2  | 0.00437 | 1.078567 | ACSL1;ACTR2;ADAM17;ADM;AGFG1;AGPAT9;AGTPBP1;AHCTF1;ALDH1A2;ALOX5;ALOX5AP;ANKRD6;ANXA3    |                                             |
| red | BP | GO:0032677 | regulation of interleukin-8 production        | 17735 | 40    | 466 | 5   | 1.09   | 0.00439 | 4.587156 | ADAM17;IL1B;TLR2;TLR4;TLR5                                                               |                                             |
| red | MF | GO:0005149 | interleukin-1 receptor binding                | 17735 | 13    | 466 | 3   | 0.35   | 0.0044  | 8.571429 | IL1B;IL1RN;TLR5                                                                          |                                             |
| red | MF | GO:0070851 | growth factor receptor binding                | 17735 | 97    | 466 | 8   | 2.59   | 0.0044  | 3.088803 | ADAM17;IL1B;IL1R1;IL1RN;LYN;NPTN;SDCPB;TLR5                                              |                                             |
| red | BP | GO:0070304 | positive regulation of stress-activated ...   | 17735 | 57    | 466 | 6   | 1.55   | 0.00442 | 3.870968 | HMGC                                                                                     |                                             |
| red | BP | GO:0009914 | hormone transport                             | 17735 | 232   | 466 | 14  | 6.32   | 0.00461 | 2.21519  | ADM;CACNA1E;HICAR2;HIF1A;HMGC                                                            |                                             |
| red | BP | GO:0046827 | positive regulation of protein export fr...   | 17735 | 13    | 466 | 3   | 0.35   | 0.00468 | 8.571429 | GSK3B;IL1B;WIPF1                                                                         |                                             |
| red | MF | GO:0005504 | fatty acid binding                            | 17735 | 26    | 466 | 4   | 0.69   | 0.0047  | 5.797101 | ALOX5AP;OXER1;SH3GLB1;STX3                                                               |                                             |
| red | CC | GO:0031982 | vesicle                                       | 17735 | 993   | 466 | 40  | 26.2   | 0.00512 | 1.526718 | ACPP;AGFG1;ANXA3;AP3B2;APH1B;ATP7B;CA4;CCT4;CYBB;DMXL2;F5;FCGR1A;FCGR1B;FLOT1;GABARAP1;I |                                             |
| red | BP | GO:0046824 | positive regulation of nucleocytoplasmic...   | 17735 | 79    | 466 | 7   | 2.15   | 0.00568 | 3.255814 | GSK3B;IL1B;KPN1;TLR2;TLR4;TNFSF14;WIPF1                                                  |                                             |
| red | BP | GO:0034121 | regulation of toll-like receptor signali...   | 17735 | 27    | 466 | 4   | 0.74   | 0.00579 | 5.405405 | IRAK3;LYN;TLR2;TLR5                                                                      |                                             |
| red | BP | GO:0006607 | NLS-bearing substrate import into nucleu...   | 17735 | 14    | 466 | 3   | 0.38   | 0.00583 | 7.894737 | FYB;KPN1;KPN4                                                                            |                                             |
| red | BP | GO:0070498 | interleukin-1-mediated signaling pathway      | 17735 | 14    | 466 | 3   | 0.38   | 0.00583 | 7.894737 | IL1R1;IL1RN;IRAK3                                                                        |                                             |
| red | BP | GO:0090025 | regulation of monocyte chemotaxis             | 17735 | 14    | 466 | 3   | 0.38   | 0.00583 | 7.894737 | CCR1;CCR2;LYN                                                                            |                                             |
| red | BP | GO:0032637 | interleukin-8 production                      | 17735 | 43    | 466 | 5   | 1.17   | 0.00601 | 4.273504 | ADAM17;IL1B;TLR2;TLR4;TLR5                                                               |                                             |
| red | BP | GO:0044281 | small molecule metabolic process              | 17735 | 2545  | 466 | 89  | 69.31  | 0.00612 | 1.284086 | ACPP;ACSL1;ADM;AGFG1;AGPAT9;ALDH1A2;ALOX5;ALOX5AP;APOBEC3A;ARHGEF19;ARL4D;ARSB;ASAP1;A   |                                             |
| red | BP | GO:0001892 | embryonic placenta development                | 17735 | 81    | 466 | 7   | 2.21   | 0.0065  | 3.167421 | ADM;GCM1;HEY1;HIF1A;SLC8A1;SOCS3;STK3                                                    |                                             |
| red | CC | GO:0031201 | SNARE complex                                 | 17735 | 29    | 466 | 4   | 0.77   | 0.00673 | 5.194805 | STX12;STX3;STX6;VAMP3                                                                    |                                             |
| red | MF | GO:0016411 | acylglycerol O-acyltransferase activity       | 17735 | 15    | 466 | 3   | 0.4    | 0.0068  | 7.5      | DGAT2;MBOAT2;SH3GLB1                                                                     |                                             |
| red | MF | GO:0030332 | cyclin binding                                | 17735 | 15    | 466 | 3   | 0.4    | 0.0068  | 7.5      | CDK14;CDK4;CUL3                                                                          |                                             |
| red | BP | GO:0061041 | regulation of wound healing                   | 17735 | 82    | 466 | 7   | 2.23   | 0.00695 | 3.139013 | HMGC                                                                                     |                                             |
| red | BP | GO:0060713 | labyrinthine layer morphogenesis              | 17735 | 15    | 466 | 3   | 0.41   | 0.00715 | 7.317073 | ADM;GCM1;SOCS3                                                                           |                                             |
| red | BP | GO:0006953 | acute-phase response                          | 17735 | 45    | 466 | 5   | 1.23   | 0.00729 | 4.065041 | HP;IL1B;IL1RN;ORM1;ORM2                                                                  |                                             |
| red | BP | GO:0006753 | nucleoside phosphate metabolic process        | 17735 | 834   | 466 | 35  | 22.71  | 0.0073  | 1.541171 | ACPP;ADM;AGFG1;ARHGEF19;ARL4D;ASAP1;ATP2C2;ATP5G1;ATP7B;CBS;CCR2;CDA;CDKL5;DCTPP1;DOCK1; |                                             |
| red | BP | GO:0061025 | membrane fusion                               | 17735 | 83    | 466 | 7   | 2.26   | 0.00741 | 3.097345 | PVRL2;SNAP23;STX11;STX3;STX6;TRIM9;VAMP3                                                 |                                             |
| red | CC | GO:0030659 | cytoplasmic vesicle membrane                  | 17735 | 360   | 466 | 18  | 9.5    | 0.00741 | 1.894737 | ANXA3;AP3B2;CA4;CYBB;DMXL2;FCGR1A;FCGR1B;GABARAP1;GPR89A;ITM2B;LAMP2;PICALM;RAB27A;RAE   |                                             |
| red | BP | GO:0019637 | organophosphate metabolic process             | 17735 | 1204  | 466 | 47  | 32.79  | 0.00767 | 1.433364 | ACPP;ADM;AGFG1;AGPAT9;ARHGEF19;ARL4D;ARSB;ASAP1;ATP2C2;ATP5G1;ATP7B;CBS;CCR2;CDA;CDKL5;D |                                             |
| red | BP | GO:0001933 | negative regulation of protein phosphory...   | 17735 | 197   | 466 | 12  | 5.36   | 0.00782 | 2.238806 | DNAJC3;GNAQ;GSK3B;HMGC                                                                   |                                             |
| red | BP | GO:0001959 | regulation of cytokine-mediated signalin...   | 17735 | 84    | 466 | 7   | 2.29   | 0.0079  | 3.056769 | HIF1A;IFNAR1;IFNGR2;IL1RN;IRAK3;PIAS1;SOCS3                                              |                                             |
| red | BP | GO:0007259 | JAK-STAT cascade                              | 17735 | 105   | 466 | 8   | 2.86   | 0.00791 | 2.797203 | ADAM17;CCR2;IFNAR1;LYN;OSM;PIAS1;SOCS3;TNFRSF1A                                          |                                             |
| red | BP | GO:0045055 | regulated secretory pathway                   | 17735 | 46    | 466 | 5   | 1.25   | 0.008   | 4        | ANXA3;CCR2;LYN;RAB27A;RAB31                                                              |                                             |
| red | BP | GO:0048066 | developmental pigmentation                    | 17735 | 46    | 466 | 5   | 1.25   | 0.008   | 4        | BCL2L11;GNAQ;MYO5A;RAB27A;SOD2                                                           |                                             |
| red | MF | GO:0004198 | calcium-dependent cysteine-type endopept...   | 17735 | 16    | 466 | 3   | 0.43   | 0.0082  | 6.976744 | CAPN12;CAPN13;CAPN8                                                                      |                                             |
| red | MF | GO:0008329 | pattern recognition receptor activity         | 17735 | 16    | 466 | 3   | 0.43   | 0.0082  | 6.976744 | PGLYR1;TLR2;TLR4                                                                         |                                             |
| red | BP | GO:0009112 | nucleobase metabolic process                  | 17735 | 65    | 466 | 6   | 1.77   | 0.00839 | 3.389831 | ACPP;CDA;DPYD;GMPR2;NT5C2;PNP                                                            |                                             |
| red | BP | GO:0032729 | nucleobase regulation of interferon-gamma ... | 17735 | 30    | 466 | 4   | 0.82   | 0.00848 | 4.878049 | CCR2;IFNAR1;IL1B;TLR4                                                                    |                                             |
| red | BP | GO:0045429 | positive regulation of nitric oxide bios...   | 17735 | 30    | 466 | 4   | 0.82   | 0.00848 | 4.878049 | IL1B;SOD2;TLR2;TLR4                                                                      |                                             |
| red | BP | GO:0055086 | nucleobase-containing small molecule met...   | 17735 | 873   | 466 | 36  | 23.77  | 0.00853 | 1.514514 | ACPP;ADM;AGFG1;APOBEC3A;ARHGEF19;ARL4D;ASAP1;ATP2C2;ATP5G1;ATP7B;CBS;CCR2;CDA;CDKL5;DCTI |                                             |
| red | BP | GO:0010955 | negative regulation of protein processin...   | 17735 | 16    | 466 | 3   | 0.44   | 0.00862 | 6.818182 | CD55;CD59;CR1                                                                            |                                             |

|     |    |            |                                             |       |      |     |     |        |         |          |                                                                                               |
|-----|----|------------|---------------------------------------------|-------|------|-----|-----|--------|---------|----------|-----------------------------------------------------------------------------------------------|
| red | BP | GO:0016578 | histone deubiquitination                    | 17735 | 16   | 466 | 3   | 0.44   | 0.00862 | 6.818182 | ATXN7;UIMC1;USP3                                                                              |
| red | BP | GO:0030502 | negative regulation of bone mineralizati... | 17735 | 16   | 466 | 3   | 0.44   | 0.00862 | 6.818182 | CCR1;HIF1A;NFE2                                                                               |
| red | BP | GO:0042533 | tumor necrosis factor biosynthetic proce... | 17735 | 16   | 466 | 3   | 0.44   | 0.00862 | 6.818182 | CCR2;TLR2;TLR4                                                                                |
| red | BP | GO:0042534 | regulation of tumor necrosis factor bios... | 17735 | 16   | 466 | 3   | 0.44   | 0.00862 | 6.818182 | CCR2;TLR2;TLR4                                                                                |
| red | BP | GO:0045070 | positive regulation of viral genome repl... | 17735 | 16   | 466 | 3   | 0.44   | 0.00862 | 6.818182 | SRP11;SRPK2;TARBP2                                                                            |
| red | BP | GO:0045087 | innate immune response                      | 17735 | 550  | 466 | 25  | 14.98  | 0.00872 | 1.668892 | APOBEC3A;CCR2;CD55;CR1;CYBB;FCGR1A;FCGR1B;IFNAR1;IFNGR2;IL18RAP;IL1R1;IRAK3;LYN;NAIP;PELI2;PG |
| red | BP | GO:0042306 | regulation of protein import into nucleu... | 17735 | 129  | 466 | 9   | 3.51   | 0.00875 | 2.564103 | GNAQ;GSK3B;IL1B;KPN1A;LITAF;TLR2;TLR4;TNFRSF1A;TNFSF14                                        |
| red | BP | GO:0002444 | myeloid leukocyte mediated immunity         | 17735 | 47   | 466 | 5   | 1.28   | 0.00876 | 3.90625  | ADAM17;ANXA3;CCR2;FCGR1A;LYN                                                                  |
| red | BP | GO:0032496 | response to lipopolysaccharide              | 17735 | 200  | 466 | 12  | 5.45   | 0.00877 | 2.201835 | ADM;IL1B;IRAK3;LITAF;LYN;PDE4B;SOD2;TLR2;TLR4;TNFRSF1A;TRIB1                                  |
| red | BP | GO:0050789 | regulation of biological process            | 17735 | 8134 | 466 | 245 | 221.52 | 0.0089  | 1.105995 | ACSL1;ADAM17;ADM;AGFG1;AGPAT9;ALDH1A2;ALOX5AP;ANKRD6;ANXA3;APAF1;APBB2;APH1B;APOBEC3A         |
| red | CC | GO:0045335 | phagocytic vesicle                          | 17735 | 68   | 466 | 6   | 1.79   | 0.00899 | 3.351955 | ANXA3;CYBB;LAMP2;NCF4;RAB31;STX12                                                             |
| red | BP | GO:0032640 | tumor necrosis factor production            | 17735 | 66   | 466 | 6   | 1.8    | 0.00902 | 3.333333 | CCR2;IRAK3;TLR2;TLR4;TNFRSF1A;ZFP36                                                           |
| red | BP | GO:0032680 | regulation of tumor necrosis factor prod... | 17735 | 66   | 466 | 6   | 1.8    | 0.00902 | 3.333333 | CCR2;IRAK3;TLR2;TLR4;TNFRSF1A;ZFP36                                                           |
| red | BP | GO:0046879 | hormone secretion                           | 17735 | 226  | 466 | 13  | 6.15   | 0.00913 | 2.113821 | ADM;CACNA1E;HCAR2;HIF1A;HMGCR;IL1B;IL1RN;INHBB;IQGAP1;LYN;MARCKS;MYO5A;OSM                    |
| red | BP | GO:0071216 | cellular response to biotic stimulus        | 17735 | 108  | 466 | 8   | 2.94   | 0.00932 | 2.721088 | GSK3B;IL1B;LITAF;LYN;PDE4B;TLR2;TLR4;TRIB1                                                    |
| red | CC | GO:0005635 | nuclear envelope                            | 17735 | 314  | 466 | 16  | 8.28   | 0.00947 | 1.932367 | AGF1;ALOX5;ALOX5AP;ATF6;CDK4;GNAQ;KAZN;KPN1A;LBR;LMNB1;NUP50;NUP11;RANBP1;TOR1                |
| red | BP | GO:0042990 | regulation of transcription factor impor... | 17735 | 67   | 466 | 6   | 1.82   | 0.00969 | 3.296703 | GSK3B;IL1B;LITAF;TLR2;TLR4;TNFSF14                                                            |
| red | CC | GO:0012506 | vesicle membrane                            | 17735 | 371  | 466 | 18  | 9.79   | 0.00993 | 1.838611 | ANXA3;AP3B2;CA4;CYBB;DMXL2;FCGR1A;FCGR1B;GABARAP1;GPR89A;ITM2B;LAMP2;PICALM;RAB27A;RAE        |
| red | BP | GO:0031349 | positive regulation of defense response     | 17735 | 229  | 466 | 13  | 6.24   | 0.01013 | 2.083333 | ALOX5AP;CCR2;FCGR1A;IL1B;IRAK3;LYN;OSM;PELI2;PVRL2;TLR2;TLR4;TLR5;TNFRSF1A                    |
| red | BP | GO:0032715 | negative regulation of interleukin-6 pro... | 17735 | 17   | 466 | 3   | 0.46   | 0.01026 | 6.521739 | IRAK3;TLR4;TNFRSF1A                                                                           |
| red | BP | GO:0060669 | embryonic placenta morphogenesis            | 17735 | 17   | 466 | 3   | 0.46   | 0.01026 | 6.521739 | ADM;GCM1;SOCS3                                                                                |
| red | BP | GO:0061082 | myeloid leukocyte cytokine production       | 17735 | 17   | 466 | 3   | 0.46   | 0.01026 | 6.521739 | IRAK3;TLR2;TLR4                                                                               |
| red | BP | GO:0042991 | transcription factor import into nucleus    | 17735 | 68   | 466 | 6   | 1.85   | 0.01039 | 3.243243 | GSK3B;IL1B;LITAF;TLR2;TLR4;TNFSF14                                                            |
| red | BP | GO:0032642 | regulation of chemokine production          | 17735 | 49   | 466 | 5   | 1.33   | 0.01042 | 3.759398 | ADAM17;HIF1A;IL1B;TLR2;TLR4                                                                   |
| red | BP | GO:0009117 | nucleotide metabolic process                | 17735 | 825  | 466 | 34  | 22.47  | 0.01054 | 1.513129 | ACPP;ADM;AGFG1;ARHGEF19;ARL4D;ASAP1;ATP2C2;ATP5G1;ATP7B;CBS;CCR2;CD9A;CDK5;DOCK1;DOCK4;I      |
| red | BP | GO:1900180 | regulation of protein localization to nu... | 17735 | 133  | 466 | 9   | 3.62   | 0.01058 | 2.486188 | GNAQ;GSK3B;IL1B;KPN1A;LITAF;TLR2;TLR4;TNFRSF1A;TNFSF14;WIP1                                   |
| red | BP | GO:0048584 | positive regulation of response to stimu... | 17735 | 1164 | 466 | 45  | 31.7   | 0.01063 | 1.419558 | ADAM17;ALOX5AP;ANKRD6;BCL2L11;C3AR1;CCR1;CCR2;CD55;CD59;CDH2;CR1;FCGR1A;FPR1;FYB;GPR89A;I     |
| red | BP | GO:0042993 | positive regulation of transcription fac... | 17735 | 32   | 466 | 4   | 0.87   | 0.01066 | 4.597701 | IL1B;TLR2;TLR4;TNFSF14                                                                        |
| red | BP | GO:0010033 | response to organic substance               | 17735 | 1870 | 466 | 67  | 50.93  | 0.01076 | 1.315531 | ACSL1;ADAM17;ADM;ALDH1A2;AQP9;ARSB;ATF6;ATP6V1A;CA4;CACNA1E;CBS;CCR1;CCR2;CD55;CDK4;CON       |
| red | BP | GO:0046822 | regulation of nucleocytoplasmic transpor... | 17735 | 158  | 466 | 10  | 4.3    | 0.01132 | 2.325581 | GNAQ;GSK3B;IL1B;KPN1A;LITAF;TLR2;TLR4;TNFRSF1A;TNFSF14;WIP1                                   |
| red | BP | GO:0060759 | regulation of response to cytokine stimu... | 17735 | 90   | 466 | 7   | 2.45   | 0.01136 | 2.857143 | HIF1A;IFNAR1;IFNGR2;IL1RN;IRAK3;PIAS1;SOCS3                                                   |
| red | MF | GO:0030234 | enzyme regulator activity                   | 17735 | 970  | 466 | 38  | 25.93  | 0.0115  | 1.465484 | AGFG1;ALOX5AP;ANXA3;APAF1;ARHGAP19;ARHGEF19;ASAP1;CD55;CS7;CYTH4;DNAJC3;DOCK1;DOCK4;EV        |
| red | BP | GO:0071706 | tumor necrosis factor superfamily cytoki... | 17735 | 70   | 466 | 6   | 1.91   | 0.0119  | 3.141361 | CCR2;IRAK3;TLR2;TLR4;TNFRSF1A;ZFP36                                                           |
| red | BP | GO:0051656 | establishment of organelle localization     | 17735 | 113  | 466 | 8   | 3.08   | 0.01206 | 2.597403 | CUL3;GPSM2;INSC;MYO5A;PVRL2;RAB27A;SEC24D;SNAP23                                              |
| red | BP | GO:0002407 | dendritic cell chemotaxis                   | 17735 | 18   | 466 | 3   | 0.49   | 0.01207 | 6.122449 | CCR1;CCR2;CXCR1                                                                               |
| red | BP | GO:0070168 | negative regulation of biomineral tissue... | 17735 | 18   | 466 | 3   | 0.49   | 0.01207 | 6.122449 | CCR1;HIF1A;NFE2                                                                               |
| red | BP | GO:0048518 | positive regulation of biological proces... | 17735 | 3464 | 466 | 114 | 94.34  | 0.01209 | 1.208395 | ACSL1;ADAM17;ADM;ALDH1A2;ALOX5AP;ANKRD6;ANXA3;ATF6;ATXN1;ATXN7;AVIL;BCL2L11;C3AR1;CASP4       |
| red | BP | GO:0009617 | response to bacterium                       | 17735 | 341  | 466 | 17  | 9.29   | 0.01238 | 1.829295 | ADAM17;ADM;ANXA3;FCGR1A;HP;IL1B;IRAK3;LITAF;LYN;PDE4B;PGLYRP1;PLD1;SOD2;TLR2;TLR4;TNFRSF1A;   |
| red | BP | GO:0002237 | response to molecule of bacterial origin    | 17735 | 211  | 466 | 12  | 5.75   | 0.01303 | 2.086957 | ADAM17;ADM;IL1B;IRAK3;LITAF;LYN;PDE4B;SOD2;TLR2;TLR4;TNFRSF1A;TRIB1                           |
| red | MF | GO:0005083 | small GTPase regulator activity             | 17735 | 295  | 466 | 15  | 7.88   | 0.0133  | 1.903553 | AGFG1;ARHGEF19;ASAP1;CYTH4;DOCK4;EVIS;GPSM2;IQGAP1;RANBP1;RAPGEF2;RASGRP4;SBF2;SOS2;TBC1      |
| red | BP | GO:0071222 | cellular response to lipopolysaccharide     | 17735 | 93   | 466 | 7   | 2.53   | 0.01345 | 2.766798 | IL1B;LITAF;LYN;PDE4B;TLR2;TLR4;TRIB1                                                          |
| red | MF | GO:0042578 | phosphoric ester hydrolase activity         | 17735 | 351  | 466 | 17  | 9.38   | 0.0136  | 1.812367 | ACPP;C3AR1;CCR1;DUSP13;GDE1;INPP5A;MTMR10;NTSC2;PDE4B;PFKFB4;PLD1;PPA2B;PPP3CC;PPP3R1;PF      |
| red | BP | GO:0051174 | regulation of phosphorus metabolic proce... | 17735 | 1246 | 466 | 47  | 33.93  | 0.01383 | 1.385205 | ACSL1;ADAM17;ADM;AGFG1;ARHGEF19;ASAP1;ATF6;ATXN1;ATXN7;CBS;CCR2;CD4;CDK5;DNAJB11;DNAJC        |
| red | BP | GO:0071396 | cellular response to lipid                  | 17735 | 213  | 466 | 12  | 5.8    | 0.01395 | 2.068966 | ALDH1A2;DGAT2;IL1B;LITAF;LYN;PDE4B;PDK3;TLR2;TLR4;TNFRSF1A;TRIB1;WNT1                         |
| red | BP | GO:0036336 | dendritic cell migration                    | 17735 | 19   | 466 | 3   | 0.52   | 0.01405 | 5.769231 | CCR1;CCR2;CXCR1                                                                               |
| red | BP | GO:0060706 | cell differentiation involved in embryon... | 17735 | 19   | 466 | 3   | 0.52   | 0.01405 | 5.769231 | GCM1;SOCS3;STK3                                                                               |
| red | CC | GO:0031965 | nuclear membrane                            | 17735 | 194  | 466 | 11  | 5.12   | 0.01413 | 2.148438 | AHCTF1;ALOX5;ALOX5AP;CDK4;GNAQ;KAZN;LBR;LMNB1;NUP50;NUP11;TOR1AIP2                            |
| red | BP | GO:0032602 | chemokine production                        | 17735 | 53   | 466 | 5   | 1.44   | 0.01436 | 3.472222 | ADAM17;HIF1A;IL1B;TLR2;TLR4                                                                   |
| red | BP | GO:0050931 | pigment cell differentiation                | 17735 | 35   | 466 | 4   | 0.95   | 0.01457 | 4.210526 | GNAQ;MYO5A;RAB27A;SOD2                                                                        |
| red | CC | GO:0030136 | clathrin-coated vesicle                     | 17735 | 195  | 466 | 11  | 5.14   | 0.01463 | 2.140078 | AP3B2;DMXL2;FCGR1A;FCGR1B;MME;PICALM;STX6;SYN2;SYNGR3;TRIM9;VAMP3                             |
| red | BP | GO:0002274 | myeloid leukocyte activation                | 17735 | 117  | 466 | 8   | 3.19   | 0.01465 | 2.507837 | ANXA3;CCR2;LYN;PTPRE;PVRL2;RHOH;SBNO2;TLR4                                                    |
| red | BP | GO:0048585 | negative regulation of response to stimu... | 17735 | 784  | 466 | 32  | 21.35  | 0.01465 | 1.498829 | ADM;ANKRD6;ATXN1;ATXN7;CCR2;CD55;CD59;CDH2;CR1;CUL3;GSK3B;HEY1;HIF1A;HMGCR;HP;IL1B;IL1RN;     |
| red | BP | GO:0009628 | response to abiotic stimulus                | 17735 | 754  | 466 | 31  | 20.53  | 0.01471 | 1.509985 | ADAM17;ADM;AQP9;ARSB;ATXN1;BEST1;CACNA1E;CASP5;CBS;CDK4;CHRNA10;HIF1A;HMGCR;IL1B;LIMD1;I      |
| red | BP | GO:0032940 | secretion by cell                           | 17735 | 694  | 466 | 29  | 18.9   | 0.01475 | 1.534392 | ADM;ANXA3;ARL4D;CACNA1E;CCR1;CCR2;F5;HCAR2;HIF1A;HMGCR;IL1B;IL1RN;INHBB;IQGAP1;LAMP2;LYN;     |
| red | MF | GO:0032403 | protein complex binding                     | 17735 | 327  | 466 | 16  | 8.74   | 0.015   | 1.830664 | ADAM17;CDK4;DOK4;FCGR1A;FCGR1B;FCGR1C;FCGR2A;FCGR3B;FYB;GNAQ;GSK3B;IQGAP1;LYN;PPAP2B;TN       |
| red | BP | GO:0072521 | purine-containing compound metabolic pro... | 17735 | 725  | 466 | 30  | 19.74  | 0.01501 | 1.519757 | ACPP;ADM;AGFG1;ARHGEF19;ARL4D;ASAP1;ATP2C2;ATP5G1;ATP7B;CBS;CCR2;CDK5;DOCK1;DOCK4;DPYD        |
| red | BP | GO:0009607 | response to biotic stimulus                 | 17735 | 606  | 466 | 26  | 16.5   | 0.01506 | 1.575758 | ADAM17;ADM;ANXA3;APOBEC3A;BCL2L11;DNAJC3;FCGR1A;GSK3B;HP;IFNAR1;IFNGR2;IL1B;IRAK3;LITAF;LY    |
| red | BP | GO:0040011 | locomotion                                  | 17735 | 1253 | 466 | 47  | 34.12  | 0.01518 | 1.377491 | ADAM17;ANXA3;AVL9;C3AR1;CACNA1E;CCR1;CCR2;CD177;CDH2;CDK5;CENPV;CUL3;CXCR1;DOCK1;DOCK4        |
| red | MF | GO:0017016 | Ras GTPase binding                          | 17735 | 120  | 466 | 8   | 3.21   | 0.0152  | 2.492212 | CDCC64B;CDK5;DMXL2;DOCK4;IQGAP1;MYO5A;RANBP1;RHOH                                             |
| red | MF | GO:0008373 | sialyltransferase activity                  | 17735 | 20   | 466 | 3   | 0.53   | 0.0154  | 5.660377 | ST3GAL4;ST3GAL5;ST6GALNAC2                                                                    |
| red | MF | GO:0048365 | Rac GTPase binding                          | 17735 | 20   | 466 | 3   | 0.53   | 0.0154  | 5.660377 | CDK5;DOCK4;IQGAP1                                                                             |
| red | BP | GO:0006997 | nucleus organization                        | 17735 | 54   | 466 | 5   | 1.47   | 0.01549 | 3.401361 | AHCTF1;ATXN7;PVRL2;SRPK1;SRPK2                                                                |
| red | BP | GO:0043901 | negative regulation of multi-organism pr... | 17735 | 54   | 466 | 5   | 1.47   | 0.01549 | 3.401361 | APOBEC3A;SRPK1;SRPK2;TARBP2;TLR2                                                              |
| red | CC | GO:0044433 | cytoplasmic vesicle part                    | 17735 | 418  | 466 | 19  | 11.03  | 0.01554 | 1.722575 | ANXA3;AP3B2;CA4;CYBB;DMXL2;F5;FCGR1A;FCGR1B;GABARAP1;GPR89A;ITM2B;LAMP2;PICALM;RAB27A;I       |
| red | MF | GO:0005096 | GTPase activator activity                   | 17735 | 247  | 466 | 13  | 6.6    | 0.0157  | 1.969697 | AGFG1;ARHGAP19;ARHGEF19;ASAP1;DOCK1;DOCK4;EVIS;GNAQ;IQGAP1;RANBP1;RAPGEF2;TBC1D30;TIAM        |
| red | BP | GO:0030449 | regulation of complement activation         | 17735 | 20   | 466 | 3   | 0.54   | 0.0162  | 5.555556 | CD55;CD59;CR1                                                                                 |
| red | BP | GO:2000257 | regulation of protein activation cascade    | 17735 | 20   | 466 | 3   | 0.54   | 0.0162  | 5.555556 | CD55;CD59;CR1                                                                                 |
| red | BP | GO:0042060 | wound healing                               | 17735 | 610  | 466 | 26  | 16.61  | 0.01624 | 1.565322 | ADAM17;ARHGEF19;CD177;CD59;DOCK1;ENTPD1;F5;GNAQ;H3F3B;HIF1A;HMGCR;HPSE;JMJD1C;LAMP2;LYI       |
| red | BP | GO:0051650 | establishment of vesicle localization       | 17735 | 55   | 466 | 5   | 1.5    | 0.01667 | 3.333333 | CUL3;MYO5A;RAB27A;SEC24D;SNAP23                                                               |

|     |    |            |                                             |       |       |     |     |        |         |          |                                                                                                |
|-----|----|------------|---------------------------------------------|-------|-------|-----|-----|--------|---------|----------|------------------------------------------------------------------------------------------------|
| red | BP | GO:0006887 | exocytosis                                  | 17735 | 271   | 466 | 14  | 7.38   | 0.01672 | 1.897019 | ANXA3;CCR1;CCR2;F5;LAMP2;LYN;MYO5A;RAB27A;RAB31;SNAP23;STX12;STX3;TRIM9;VAMP3                  |
| red | BP | GO:0002682 | regulation of immune system process         | 17735 | 884   | 466 | 35  | 24.07  | 0.01673 | 1.454092 | ADAM17;C3AR1;CCR1;CCR2;CD55;CD59;CR1;FCGR1A;FCGR1B;FOXO3;FYB;HCA2;HIF1A;IFNAR1;IFNGR2;IL1      |
| red | BP | GO:0033157 | regulation of intracellular protein tran... | 17735 | 168   | 466 | 10  | 4.58   | 0.0168  | 2.183406 | GNAQ;GSK3B;IL1B;KPNA1;LITAF;TLR2;TLR4;TNFRSF1A;TNFSF14;WIPF1                                   |
| red | BP | GO:1901135 | carbohydrate derivative metabolic proces... | 17735 | 1327  | 466 | 49  | 36.14  | 0.0173  | 1.355838 | ACPP;ADM;AGFG1;APOBEC3A;ARHGEF19;ARL4D;ARSB;ASAP1;ATP2C2;ATP5G1;ATP7B;CBS;CCR2;CDA;CDKL1       |
| red | BP | GO:0001817 | regulation of cytokine production           | 17735 | 382   | 466 | 18  | 10.4   | 0.01734 | 1.730769 | ADAM17;C3AR1;CCR2;HIF1A;HPSE;IFNAR1;IL1B;INHBB;IQGAP1;IRAK3;LITAF;LYN;PGLYRP1;TLR2;TLR4;TLRS;1 |
| red | BP | GO:0009892 | negative regulation of metabolic process    | 17735 | 1456  | 466 | 53  | 39.65  | 0.01737 | 1.336696 | ATXN1;ATXN7;CCR1;CCR2;CD55;CD59;CDA;CIR1;COMM7D;CR1;CTBP2;DNAJC3;FOXO3;GNAQ;GSK3B;HCA2         |
| red | BP | GO:0043122 | regulation of I-kappaB kinase/NF-kappaB ... | 17735 | 194   | 466 | 11  | 5.28   | 0.01738 | 2.083333 | GPR89A;IL1B;LITAF;PEL1;RHOH;SECTM1;TLR2;TLR4;TNFRSF1A;TNFSF14;WLS                              |
| red | BP | GO:0071219 | cellular response to molecule of bacteri... | 17735 | 98    | 466 | 7   | 2.67   | 0.01752 | 2.621723 | IL1B;LITAF;LYN;PDE4B;TLR2;TLR4;TRIB1                                                           |
| red | BP | GO:0008542 | visual learning                             | 17735 | 37    | 466 | 4   | 1.01   | 0.01761 | 3.960396 | ATXN1;CACNA1E;HIF1A;HMGR                                                                       |
| red | BP | GO:0045576 | mast cell activation                        | 17735 | 37    | 466 | 4   | 1.01   | 0.01761 | 3.960396 | LYN;PTPRE;PVRL2;RHOH                                                                           |
| red | BP | GO:0019220 | regulation of phosphate metabolic proces... | 17735 | 1233  | 466 | 46  | 33.58  | 0.01771 | 1.369863 | ACSL1;ADAM17;ADM;AGFG1;ARHGEF19;ASAP1;ATF6;ATXN1;ATXN7;CBS;CCR2;CDA;CDKL5;DNAJB11;DNAJC        |
| red | BP | GO:0009119 | ribonucleoside metabolic process            | 17735 | 556   | 466 | 24  | 15.14  | 0.01787 | 1.585205 | ACPP;AGFG1;APOBEC3A;ARHGEF19;ARL4D;ASAP1;ATP2C2;ATP5G1;ATP7B;CDA;CDKL5;DOCK1;DOCK4;DPYD        |
| red | BP | GO:0032874 | positive regulation of stress-activated ... | 17735 | 56    | 466 | 5   | 1.53   | 0.0179  | 3.267974 | HMGR;IL1B;SDCBP;STK3;TLR4                                                                      |
| red | BP | GO:0001782 | B cell homeostasis                          | 17735 | 21    | 466 | 3   | 0.57   | 0.01852 | 5.263158 | BCL2L11;HIF1A;LYN                                                                              |
| red | BP | GO:0046135 | pyrimidine nucleoside catabolic process     | 17735 | 21    | 466 | 3   | 0.57   | 0.01852 | 5.263158 | APOBEC3A;CDA;DPYD                                                                              |
| red | BP | GO:0046627 | negative regulation of insulin receptor ... | 17735 | 21    | 466 | 3   | 0.57   | 0.01852 | 5.263158 | IL1B;PTPRE;SOCS3                                                                               |
| red | BP | GO:0002252 | immune effector process                     | 17735 | 471   | 466 | 21  | 12.83  | 0.01877 | 1.636789 | ADAM17;ANXA3;APOBEC3A;CCR2;CD55;CD59;CR1;DNAJC3;FCGR1A;IFNAR1;IL1B;IRAK3;LYN;PAK2;PGLYRP1      |
| red | BP | GO:0007204 | elevation of cytosolic calcium ion conce... | 17735 | 171   | 466 | 10  | 4.66   | 0.01878 | 2.145923 | ADM;C3AR1;CCR1;CCR2;CD55;CHRNA10;LYN;NPTN;PROK2;SLC8A1                                         |
| red | MF | GO:0046983 | protein dimerization activity               | 17735 | 909   | 466 | 35  | 24.3   | 0.019   | 1.440329 | ACPP;ALOX5AP;APOA1BP;BCL2L11;CBS;CCR2;CDA;CYBB;DGAT2;DPYD;EXT1;H3F3B;HEY1;HIF1A;HMGR;HPS       |
| red | BP | GO:0006733 | oxidoreduction coenzyme metabolic proces... | 17735 | 57    | 466 | 5   | 1.55   | 0.0192  | 3.225806 | COQ4;HMGR;IDH1;NMNAT2;PNP                                                                      |
| red | BP | GO:0030595 | leukocyte chemotaxis                        | 17735 | 123   | 466 | 8   | 3.35   | 0.01925 | 2.38806  | ADAM17;C3AR1;CCR1;CCR2;CXCR1;IL1B;LYN;PDE4B                                                    |
| red | BP | GO:0048522 | positive regulation of cellular process     | 17735 | 3140  | 466 | 103 | 85.51  | 0.01926 | 1.204537 | ACSL1;ADAM17;ADM;ALDH1A2;ANKRD6;ANXA3;ATF6;ATXN1;ATXN7;AVIL;BCL2L11;C3AR1;CASP4;CCR1;CCR       |
| red | BP | GO:0006928 | cellular component movement                 | 17735 | 1208  | 466 | 45  | 32.9   | 0.01934 | 1.367781 | ACTR2;ADAM17;ANXA3;AP3B2;ARPC5;AVL9;C3AR1;CACNA1E;CCR1;CCR2;CD177;CDH2;CDKL5;CENPV;CUL3;       |
| red | BP | GO:0002699 | positive regulation of immune effector p... | 17735 | 100   | 466 | 7   | 2.72   | 0.01937 | 2.573529 | CCR2;FCGR1A;IL1B;LYN;PVRL2;TLR2;TLR4                                                           |
| red | BP | GO:0010942 | positive regulation of cell death           | 17735 | 444   | 466 | 20  | 12.09  | 0.0195  | 1.65426  | ALDH1A2;BCL2L11;CASP4;CDK4;FOXO3;GSK3B;HCA2;HMGR;HP;ITM2B;LYN;MLLT11;NCOA1;PDCD7;SRPK          |
| red | MF | GO:0008374 | O-acyltransferase activity                  | 17735 | 39    | 466 | 4   | 1.04   | 0.0198  | 3.846154 | AGPAT9;DGAT2;MBOAT2;SH3GLB1                                                                    |
| red | CC | GO:0044464 | cell part                                   | 17735 | 14451 | 466 | 396 | 381.27 | 0.02031 | 1.038634 | ACPP;ACSL1;ACTR2;ADAM17;ADM;AGFG1;AGPAT9;AGTPBP1;AHCTF1;AKR7A3;ALDH1A2;ALOX5;ALOX5AP;A         |
| red | CC | GO:0005623 | cell                                        | 17735 | 14452 | 466 | 396 | 381.29 | 0.02049 | 1.03858  | ACPP;ACSL1;ACTR2;ADAM17;ADM;AGFG1;AGPAT9;AGTPBP1;AHCTF1;AKR7A3;ALDH1A2;ALOX5;ALOX5AP;A         |
| red | BP | GO:0045088 | regulation of innate immune response        | 17735 | 225   | 466 | 12  | 6.13   | 0.02057 | 1.957586 | CR1;IFNAR1;IFNGR2;IRAK3;LYN;PEL1;PIAS1;PVRL2;SOCS3;TLR2;TLR4;TLRS                              |
| red | BP | GO:0033993 | response to lipid                           | 17735 | 534   | 466 | 23  | 14.54  | 0.02062 | 1.581843 | ACSL1;ADAM17;ADM;ALDH1A2;ARSB;CA4;CDK4;DGAT2;IDH1;IL1B;IL1RN;IRAK3;LITAF;LYN;PDCD7;PDE4B;PE    |
| red | CC | GO:0031090 | organelle membrane                          | 17735 | 2366  | 466 | 78  | 62.42  | 0.02067 | 1.249599 | ACPP;ACSL1;AGPAT9;AHCTF1;ALOX5;ALOX5AP;ANXR2;ANXA3;AP3B2;ATF6;ATP2C2;ATP5G1;ATP7B;ATP9A        |
| red | BP | GO:1901136 | carbohydrate derivative catabolic proces... | 17735 | 564   | 466 | 24  | 15.36  | 0.02081 | 1.5625   | AGFG1;APOBEC3A;ARHGEF19;ARL4D;ARSB;ASAP1;CDA;CDKL5;DOCK1;DOCK4;DPYD;GNAQ;GSK3B;HPSE;IDS        |
| red | CC | GO:0030175 | filopodium                                  | 17735 | 60    | 466 | 5   | 1.58   | 0.02082 | 3.164557 | ACPP;FAM65B;FGF13;MYO10;TIAM2                                                                  |
| red | CC | GO:0031252 | cell leading edge                           | 17735 | 260   | 466 | 13  | 6.86   | 0.02097 | 1.895044 | ADAM17;APBB2;ARPC5;BMX;CDH2;CDKL5;FRMD4B;IQGAP1;MYO10;MYO5A;NEDD9;S100A11;TIAM2                |
| red | BP | GO:0015695 | organic cation transport                    | 17735 | 22    | 466 | 3   | 0.6    | 0.02102 | 5        | SLC22A1;SLC22A14;SLC22A4                                                                       |
| red | BP | GO:0071320 | cellular response to cAMP                   | 17735 | 22    | 466 | 3   | 0.6    | 0.02102 | 5        | AQP9;SLC8A1;WNT10B                                                                             |
| red | BP | GO:0043299 | leukocyte degranulation                     | 17735 | 39    | 466 | 4   | 1.06   | 0.02103 | 3.773585 | ANXA3;CCR2;LYN;RAB27A                                                                          |
| red | BP | GO:0042325 | regulation of phosphorylation               | 17735 | 869   | 466 | 34  | 23.67  | 0.0213  | 1.436417 | ACSL1;ADAM17;ATF6;ATXN1;ATXN7;CBS;DNAJB11;DNAJC3;FGF13;FPR1;GNAQ;GSK3B;HMGR;IL1B;IL1RN;I       |
| red | BP | GO:0016310 | phosphorylation                             | 17735 | 1280  | 466 | 47  | 34.86  | 0.02141 | 1.34825  | ACSL1;ADAM17;ATF6;ATXN1;ATXN7;BMX;CBS;CDK4;CDKL5;DNAJB11;DNAJC3;FGF13;FPR1;FYB;GNAQ;GSK3       |
| red | BP | GO:0042493 | response to drug                            | 17735 | 335   | 466 | 16  | 9.12   | 0.02149 | 1.754386 | ACSL1;ADAM17;CA4;CDK4;EBP;GSK3B;IL1B;IL1RN;LYN;NCOA1;PDE4B;PNP;SLC22A1;SLC8A1;SOD2;TLR2        |
| red | BP | GO:0030203 | glycosaminoglycan metabolic process         | 17735 | 150   | 466 | 9   | 4.09   | 0.02166 | 2.200489 | ARSB;EXT1;HAS1;HPSE;IDS;IL1B;LYVE1;PGLYRP1;ST3GAL4                                             |
| red | BP | GO:0060326 | cell chemotaxis                             | 17735 | 150   | 466 | 9   | 4.09   | 0.02166 | 2.200489 | ADAM17;C3AR1;CCR1;CCR2;CXCR1;DOCK4;IL1B;LYN;PDE4B                                              |
| red | BP | GO:0006944 | cellular membrane fusion                    | 17735 | 80    | 466 | 6   | 2.18   | 0.02178 | 2.752294 | SNAP23;STX11;STX3;STX6;TRIM9;VAMP3                                                             |
| red | BP | GO:0006828 | regulation of canonical Wnt receptor sig... | 17735 | 126   | 466 | 8   | 3.43   | 0.02191 | 2.332362 | ANKRD6;CDH2;CDK14;GSK3B;LIMD1;STK3;WLS;WNT10B                                                  |
| red | BP | GO:0006027 | glycosaminoglycan catabolic process         | 17735 | 59    | 466 | 5   | 1.61   | 0.02198 | 3.10559  | ARSB;HPSE;IDS;LYVE1;PGLYRP1                                                                    |
| red | BP | GO:0043065 | positive regulation of apoptotic process    | 17735 | 421   | 466 | 19  | 11.47  | 0.02206 | 1.656495 | ALDH1A2;BCL2L11;CASP4;CDK4;FOXO3;GSK3B;HCA2;HMGR;ITM2B;LYN;MLLT11;NCOA1;PDCD7;SRPK2;S1         |
| red | CC | GO:0042383 | sarcolemma                                  | 17735 | 83    | 466 | 6   | 2.19   | 0.02237 | 2.739726 | CA4;CD59;FLOT1;SLC8A1;SNTA1;SNTG2                                                              |
| red | BP | GO:0009108 | coenzyme biosynthetic process               | 17735 | 103   | 466 | 7   | 2.81   | 0.02239 | 2.491103 | ACSL1;COQ4;ELOVL5;NMNAT2;PANK2;PDK3;PNP                                                        |
| red | MF | GO:0015298 | solute:cation antiporter activity           | 17735 | 23    | 466 | 3   | 0.61   | 0.0226  | 4.918033 | SLC22A4;SLC8A1;TMOC3                                                                           |
| red | BP | GO:0001819 | positive regulation of cytokine producti... | 17735 | 202   | 466 | 11  | 5.5    | 0.02268 | 2        | ADAM17;C3AR1;CCR2;HIF1A;HPSE;IFNAR1;IL1B;TLR2;TLR4;TLRS;TNFRSF1A                               |
| red | BP | GO:0080135 | regulation of cellular response to stres... | 17735 | 282   | 466 | 14  | 7.68   | 0.0227  | 1.822917 | CBS;HMGR;HP;IL1B;IL1RN;LYN;NFE2L2;SCARF1;SDCBP;STK3;TLR4;UIMC1;WAC;ZAK                         |
| red | BP | GO:0032388 | positive regulation of intracellular tra... | 17735 | 127   | 466 | 8   | 3.46   | 0.02285 | 2.312139 | GSK3B;IL1B;KPNA1;TLR2;TLR4;TNFRSF1A;TNFSF14;WIPF1                                              |
| red | MF | GO:0008047 | enzyme activator activity                   | 17735 | 404   | 466 | 18  | 10.8   | 0.0242  | 1.666667 | AGFG1;ALOX5AP;APAF1;ARHGAP19;ARHGEF19;ASAP1;DOCK1;DOCK4;EVIS;FGF13;GNAQ;IQGAP1;PAK2;RAN        |
| red | MF | GO:0015101 | organic cation transmembrane transporter... | 17735 | 24    | 466 | 3   | 0.64   | 0.0253  | 4.6875   | SLC22A1;SLC22A14;SLC22A4                                                                       |
| red | CC | GO:0030666 | endocytic vesicle membrane                  | 17735 | 109   | 466 | 7   | 2.88   | 0.02537 | 2.430556 | ANXA3;CYBB;FCGR1A;FCGR1B;LAMP2;PICALM;RAB31                                                    |
| red | MF | GO:0030695 | GTPase regulator activity                   | 17735 | 436   | 466 | 19  | 11.65  | 0.0256  | 1.630901 | AGFG1;ARHGAP19;ARHGEF19;ASAP1;CYTH4;DOCK1;DOCK4;EVIS;GNAQ;GPM2;IQGAP1;RANBP1;RAPGEF2;          |
| red | MF | GO:0019207 | kinase regulator activity                   | 17735 | 133   | 466 | 8   | 3.55   | 0.0264  | 2.253521 | DNAJC3;FGF13;PAK2;RHOH;ROPN1L;SOCS3;STK3;TRIB1                                                 |
| red | MF | GO:0031267 | small GTPase binding                        | 17735 | 133   | 466 | 8   | 3.55   | 0.0264  | 2.253521 | CCDC64B;CDKL5;DMXL2;DOCK4;IQGAP1;MYO5A;RANBP1;RHOH                                             |
| red | CC | GO:0043020 | NADPH oxidase complex                       | 17735 | 10    | 466 | 2   | 0.26   | 0.02717 | 7.692308 | CYBB;NCF4                                                                                      |
| red | CC | GO:0030135 | coated vesicle                              | 17735 | 242   | 466 | 12  | 6.38   | 0.0274  | 1.880878 | AP3B2;DMXL2;FCGR1A;FCGR1B;MME;PICALM;SEC24D;STX6;SYN2;SYNGR3;TRIM9;VAMP3                       |
| red | MF | GO:0008252 | nucleotidase activity                       | 17735 | 10    | 466 | 2   | 0.27   | 0.0278  | 7.407407 | ACPP;NTSC2                                                                                     |
| red | MF | GO:0001608 | G-protein coupled nucleotide receptor ac... | 17735 | 25    | 466 | 3   | 0.67   | 0.0282  | 4.477612 | GPR17;HCA2;HCA3                                                                                |
| red | MF | GO:0045028 | G-protein coupled purinergic nucleotide ... | 17735 | 25    | 466 | 3   | 0.67   | 0.0282  | 4.477612 | GPR17;HCA2;HCA3                                                                                |
| red | CC | GO:0030139 | endocytic vesicle                           | 17735 | 163   | 466 | 9   | 4.3    | 0.02911 | 2.093023 | ANXA3;CYBB;FCGR1A;FCGR1B;LAMP2;NCF4;PICALM;RAB31;STX12                                         |
| red | CC | GO:0000139 | Golgi membrane                              | 17735 | 540   | 466 | 22  | 14.25  | 0.02967 | 1.54386  | ATF6;ATP2C2;ATP7B;EXT1;GALNT14;GIMAP1;GLPFR2;GOLGA7B;GPR89A;ITM2B;NMNAT2;PLD1;RTN3;SEC24       |
| red | MF | GO:0005516 | calmodulin binding                          | 17735 | 162   | 466 | 9   | 4.33   | 0.0301  | 2.078522 | IQGAP1;MARCKS;MYO10;MYO5A;PPP3CC;PPP3R1;SLC8A1;SNTA1;TRPV5                                     |
| red | MF | GO:0019887 | protein kinase regulator activity           | 17735 | 113   | 466 | 7   | 3.02   | 0.0319  | 2.317881 | DNAJC3;FGF13;PAK2;ROPN1L;SOCS3;STK3;TRIB1                                                      |
| red | MF | GO:0060589 | nucleoside-triphosphatase regulator acti... | 17735 | 447   | 466 | 19  | 11.95  | 0.0319  | 1.589958 | AGFG1;ARHGAP19;ARHGEF19;ASAP1;CYTH4;DOCK1;DOCK4;EVIS;GNAQ;GPM2;IQGAP1;RANBP1;RAPGEF2;          |
| red | CC | GO:0005768 | endosome                                    | 17735 | 546   | 466 | 22  | 14.41  | 0.03295 | 1.526718 | ACPP;ATP11A;ATP7B;ATP9A;AVL9;FCGR1A;FCGR1B;FLOT1;FPR1;ITM2B;KIAA0319;LAMP2;NMNAT2;OSBP1L       |

|        |    |             |                                             |       |       |     |     |        |          |          |                                                                                                              |
|--------|----|-------------|---------------------------------------------|-------|-------|-----|-----|--------|----------|----------|--------------------------------------------------------------------------------------------------------------|
| red    | MF | GO:0042625  | ATPase activity, coupled to transmembran... | 17735 | 67    | 466 | 5   | 1.79   | 0.0333   | 2.793296 | ATP11A;ATP2C2;ATP6V1A;ATP7B;ATP9A                                                                            |
| red    | MF | GO:0008528  | G-protein coupled peptide receptor activ... | 17735 | 115   | 466 | 7   | 3.07   | 0.0346   | 2.28013  | C3AR1;CCR1;CCR2;CXCR1;FPR1;FPR2;GPR17                                                                        |
| red    | CC | GO:0044444  | cytoplasmic part                            | 17735 | 6562  | 466 | 192 | 173.13 | 0.03534  | 1.108993 | ACPP;ACSL1;AGFG1;AGPAT9;AGTPBP1;AHCTF1;AKR7A3;ALDH1A2;ALOX5;ALOX5AP;ANTXR2;ANXA3;AP3B2;                      |
| red    | MF | GO:0001653  | peptide receptor activity                   | 17735 | 116   | 466 | 7   | 3.1    | 0.0361   | 2.258065 | C3AR1;CCR1;CCR2;CXCR1;FPR1;FPR2;GPR17                                                                        |
| red    | MF | GO:0022804  | active transmembrane transporter activit... | 17735 | 306   | 466 | 14  | 18.7   | 0.0361   | 1.711491 | AQP9;ATP11A;ATP2C2;ATP6V1A;ATP7B;ATP9A;SLC12A6;SLC15A4;SLC22A1;SLC22A4;SLC26A8;SLC8A1;TIMV                   |
| red    | MF | GO:0042803  | protein homodimerization activity           | 17735 | 545   | 466 | 22  | 4.57   | 0.0363   | 1.509952 | ACPP;ALOX5AP;APOA1BP;CBS;CCR2;CDA;DGAT2;DPYD;EXT1;HMGCRC;IDH1;INHBB;IRAK3;NR6A1;PTPRE;PVRI                   |
| red    | MF | GO:0019210  | kinase inhibitor activity                   | 17735 | 48    | 466 | 4   | 1.28   | 0.0389   | 3.125    | DNAUC3;RHOH;SOCS3;TRIB1                                                                                      |
| red    | MF | GO:0004197  | cysteine-type endopeptidase activity        | 17735 | 70    | 466 | 5   | 1.87   | 0.0391   | 2.673797 | CAPN12;CAPN13;CAPNB;CASP4;CASP5                                                                              |
| red    | MF | GO:0016493  | C-C chemokine receptor activity             | 17735 | 12    | 466 | 2   | 0.32   | 0.0394   | 6.25     | CCR1;CCR2                                                                                                    |
| red    | MF | GO:0051020  | GTPase binding                              | 17735 | 145   | 466 | 8   | 3.88   | 0.041    | 2.061856 | CCDC64B;CDKL5;DMXL2;DOCK4;IQGAP1;MYO5A;RANBP1;RHOH                                                           |
| red    | MF | GO:0033293  | monocarboxylic acid binding                 | 17735 | 49    | 466 | 4   | 1.31   | 0.0415   | 3.053435 | ALOX5AP;OXER1;SH3GLB1;STX3                                                                                   |
| red    | MF | GO:0016791  | phosphatase activity                        | 17735 | 255   | 466 | 12  | 6.82   | 0.0418   | 1.759531 | ACPP;DUSP13;INPP5A;MTMR10;NTS2;PFKFB4;PPAP2B;PPP3CC;PPP3R1;PPP4R1;PTPRE;SBF2                                 |
| red    | MF | GO:0016746  | transferase activity, transferring acyl ... | 17735 | 227   | 466 | 11  | 6.07   | 0.0419   | 1.812191 | AGPAT9;DGAT2;ELOVL5;MBOAT2;NCOA1;NCOA2;OLAH;QPCT;SH3GLB1;TGM3;ZDHHC19                                        |
| red    | CC | GO:00048471 | perinuclear region of cytoplasm             | 17735 | 469   | 466 | 19  | 12.37  | 0.04325  | 1.535974 | ALDH1A2;ATP7B;ATP9A;CA4;CCR2;CDK4;DGAT2;GSK3B;INHBB;LYN;MRV11;PAK2;PDE4B;PICALM;PLD1;SEC2C                   |
| red    | MF | GO:0015662  | ATPase activity, coupled to transmembran... | 17735 | 50    | 466 | 4   | 1.34   | 0.0442   | 2.985075 | ATP11A;ATP2C2;ATP7B;ATP9A                                                                                    |
| red    | CC | GO:0030670  | phagocytic vesicle membrane                 | 17735 | 51    | 466 | 4   | 1.35   | 0.04517  | 2.962963 | ANXA3;CYBB;LAMP2;RAB31                                                                                       |
| red    | MF | GO:0005095  | GTPase inhibitor activity                   | 17735 | 13    | 466 | 2   | 0.35   | 0.0458   | 5.714286 | IQGAP1;RHOH                                                                                                  |
| red    | MF | GO:0005161  | platelet-derived growth factor receptor ... | 17735 | 13    | 466 | 2   | 0.35   | 0.0458   | 5.714286 | IL1R1;LYN                                                                                                    |
| red    | CC | GO:0001726  | ruffle                                      | 17735 | 124   | 466 | 7   | 3.27   | 0.04611  | 2.140673 | ADAM17;BMX;CDKL5;FRMD4B;MYO10;MYO5A;S100A11                                                                  |
| red    | MF | GO:0017048  | Rho GTPase binding                          | 17735 | 51    | 466 | 4   | 1.36   | 0.047    | 2.941176 | CDKL5;DOCK4;IQGAP1;RHOH                                                                                      |
| red    | MF | GO:0005085  | guanyl-nucleotide exchange factor activi... | 17735 | 176   | 466 | 9   | 4.7    | 0.0471   | 1.914894 | ARHGEF19;CYTH4;DOCK1;DOCK4;RAPGEF2;RASGRP4;SBF2;SOS2;TIAM2                                                   |
| red    | CC | GO:0030669  | clathrin-coated endocytic vesicle membra... | 17735 | 31    | 466 | 3   | 0.82   | 0.04752  | 3.658537 | FCGR1A;FCGR1B;PICALM                                                                                         |
| red    | CC | GO:0005643  | nuclear pore                                | 17735 | 75    | 466 | 5   | 1.98   | 0.04798  | 2.525253 | AGFG1;AHCTF1;KPNA1;NUP50;NUPL1                                                                               |
| red    | CC | GO:0034399  | nuclear periphery                           | 17735 | 100   | 466 | 6   | 2.64   | 0.04898  | 2.272727 | AHCTF1;ALOX5;ATXN1;ATXN7;LMNB1;SRPK1                                                                         |
| red    | CC | GO:0042995  | cell projection                             | 17735 | 1194  | 466 | 41  | 31.5   | 0.04992  | 1.301587 | ACPP;ACTR2;ADAM17;APBB2;ARPC5;ATP6V1A;AVIL;BMX;CA4;CCR2;CDH2;CDKL5;CHRNA10;DNAH14;DOCK4                      |
| purple | CC | GO:0031091  | platelet alpha granule                      | 17735 | 60    | 134 | 16  | 0.47   | 8.50E-21 | 34.04255 | CD9;CLU;EGF;ITGA2B;ITGB3;MMRN1;PDGFA;PF4;PPBP;PROS1;SELP;SERPINE1;SPARC;TREM1;VEGFC;VWF                      |
| purple | BP | GO:0042060  | wound healing                               | 17735 | 610   | 134 | 34  | 4.66   | 1.20E-20 | 7.296137 | ADRA2A;CD9;CLU;EGF;ESAM;F2RL3;GP6;GP9;GRB14;GUCY1A3;GUCY1B3;ITGA2B;ITGB3;MGLL;MMRN1;MYL                      |
| purple | BP | GO:0007596  | blood coagulation                           | 17735 | 498   | 134 | 30  | 3.8    | 4.10E-19 | 7.894737 | ADRA2A;CD9;CLU;EGF;ESAM;F2RL3;GP6;GP9;GRB14;GUCY1A3;GUCY1B3;ITGA2B;ITGB3;MGLL;MMRN1;PDE                      |
| purple | BP | GO:0050817  | coagulation                                 | 17735 | 501   | 134 | 30  | 3.82   | 4.80E-19 | 7.853403 | ADRA2A;CD9;CLU;EGF;ESAM;F2RL3;GP6;GP9;GRB14;GUCY1A3;GUCY1B3;ITGA2B;ITGB3;MGLL;MMRN1;PDE                      |
| purple | BP | GO:0007599  | hemostasis                                  | 17735 | 502   | 134 | 30  | 3.83   | 5.10E-19 | 7.832898 | ADRA2A;CD9;CLU;EGF;ESAM;F2RL3;GP6;GP9;GRB14;GUCY1A3;GUCY1B3;ITGA2B;ITGB3;MGLL;MMRN1;PDE                      |
| purple | BP | GO:0030168  | platelet activation                         | 17735 | 219   | 134 | 22  | 1.67   | 8.30E-19 | 13.17365 | ADRA2A;CD9;CLU;EGF;F2RL3;GP6;GP9;ITGA2B;ITGB3;MGLL;MMRN1;PDGFA;PDGFRA;PF4;PPBP;PROS1;SELP                    |
| purple | BP | GO:0002576  | platelet degranulation                      | 17735 | 83    | 134 | 15  | 0.63   | 5.20E-17 | 23.80952 | CD9;CLU;EGF;ITGA2B;ITGB3;MMRN1;PDGFA;PF4;PPBP;PROS1;SELP;SERPINE1;SPARC;VEGFC;VWF                            |
| purple | BP | GO:0050878  | regulation of body fluid levels             | 17735 | 594   | 134 | 30  | 4.53   | 5.40E-17 | 6.622517 | ADRA2A;CD9;CLU;EGF;ESAM;F2RL3;GP6;GP9;GRB14;GUCY1A3;GUCY1B3;ITGA2B;ITGB3;MGLL;MMRN1;PDE                      |
| purple | BP | GO:0009611  | response to wounding                        | 17735 | 1090  | 134 | 37  | 8.32   | 2.20E-15 | 4.447115 | ADRA2A;BMP6;CD9;CLU;EGF;ESAM;F2RL3;GP6;GP9;GRB14;GUCY1A3;GUCY1B3;ITGA2B;ITGB3;MGLL;MMRN                      |
| purple | CC | GO:0031093  | platelet alpha granule lumen                | 17735 | 47    | 134 | 11  | 0.37   | 6.00E-14 | 29.72973 | CLU;EGF;MMRN1;PDGFA;PF4;PPBP;PROS1;SERPINE1;SPARC;VEGFC;VWF                                                  |
| purple | CC | GO:0031041  | secretory granule                           | 17735 | 251   | 134 | 19  | 1.96   | 8.70E-14 | 9.693878 | ACRBP;CAV2;CD9;CLU;EGF;ITGA2B;ITGB3;MMRN1;PDGFA;PDGFRA;PF4;PPBP;PROS1;SELP;SERPINE1;SPARC;SYTL4;TR           |
| purple | CC | GO:0034774  | secretory granule lumen                     | 17735 | 50    | 134 | 11  | 0.39   | 1.30E-13 | 28.20513 | CLU;EGF;MMRN1;PDGFA;PF4;PPBP;PROS1;SERPINE1;SPARC;VEGFC;VWF                                                  |
| purple | CC | GO:0060205  | cytoplasmic membrane-bounded vesicle lum... | 17735 | 54    | 134 | 11  | 0.42   | 3.10E-13 | 26.19048 | CLU;EGF;MMRN1;PDGFA;PF4;PPBP;PROS1;SERPINE1;SPARC;VEGFC;VWF                                                  |
| purple | CC | GO:0031983  | vesicle lumen                               | 17735 | 55    | 134 | 11  | 0.43   | 3.90E-13 | 25.5814  | CLU;EGF;MMRN1;PDGFA;PF4;PPBP;PROS1;SERPINE1;SPARC;VEGFC;VWF                                                  |
| purple | BP | GO:0006887  | exocytosis                                  | 17735 | 271   | 134 | 17  | 2.07   | 2.30E-11 | 8.21256  | ADRA2A;CD9;CLU;EGF;ITGA2B;ITGB3;MMRN1;PDGFA;PF4;PPBP;PROS1;SELP;SERPINE1;SPARC;SYTL4;VEGFC                   |
| purple | BP | GO:0030141  | cell activation                             | 17735 | 758   | 134 | 25  | 5.79   | 3.80E-10 | 4.317789 | ADRA2A;EGF;F2RL3;GP6;GP9;ITGA2B;ITGB3;MGLL;MMRN1;PDGFA;PDGFRA;PF4;PPBP;PROS1;SELP;SERPINE1;SPARC;SYTL4;VEGFC |
| purple | BP | GO:0065008  | regulation of biological quality            | 17735 | 2547  | 134 | 47  | 19.44  | 7.60E-10 | 2.417695 | ACSBG1;ADRA2A;ALOX12;AVPR1A;BMP6;CA2;CD9;CLDN5;CLU;EGF;ESAM;F2RL3;GP6;GP9;GRB14;GUCY1A3;                     |
| purple | BP | GO:0032940  | secretion by cell                           | 17735 | 694   | 134 | 23  | 5.3    | 2.00E-09 | 4.339623 | ADRA2A;AVPR1A;BMP6;CD9;CLU;EGF;ITGA2B;ITGB3;MAOB;MMRN1;PCSK6;PDGFA;PF4;PPBP;PRKAR2B;PRC                      |
| purple | BP | GO:0046903  | secretion                                   | 17735 | 792   | 134 | 24  | 6.05   | 4.80E-09 | 3.966942 | ADRA2A;AVPR1A;BMP6;CA2;CD9;CLU;EGF;ITGA2B;ITGB3;MAOB;MMRN1;PCSK6;PDGFA;PF4;PPBP;PRKAR2B;PRC                  |
| purple | CC | GO:0044433  | cytoplasmic vesicle part                    | 17735 | 418   | 134 | 17  | 3.27   | 2.80E-08 | 5.198777 | CAV2;CD9;CLU;EGF;ITGA2B;ITGB3;MMRN1;PDGFA;PF4;PPBP;PROS1;SELP;SERPINE1;SPARC;SYTL4;VEGFC;VWF                 |
| purple | BP | GO:0006950  | response to stress                          | 17735 | 2926  | 134 | 47  | 22.34  | 7.50E-08 | 2.10385  | ADRA2A;AVPR1A;BMP6;CA2;CD9;CDKN1A;CLEC1B;CLU;EGF;ESAM;F2RL3;GP6;GP9;GRB14;GUCY1A3;GUCY1                      |
| purple | BP | GO:0061041  | regulation of wound healing                 | 17735 | 82    | 134 | 8   | 0.63   | 2.00E-07 | 12.69841 | ADRA2A;MYLK;PDGFA;PDGFRA;PROS1;SELP;SERPINE1;VIL1                                                            |
| purple | BP | GO:0016192  | vesicle-mediated transport                  | 17735 | 894   | 134 | 23  | 6.82   | 2.20E-07 | 3.372434 | ADRA2A;BET3L;CAV2;CD9;CLU;DNM3;EGF;ITGA2B;ITGB3;MMRN1;PDGFA;PEAR1;PF4;PPBP;PROS1;RAB6B;SI                    |
| purple | CC | GO:0031988  | membrane-bounded vesicle                    | 17735 | 905   | 134 | 23  | 7.08   | 5.00E-07 | 3.248588 | ACRBP;ACSBG1;BMP6;CAV2;CD9;CLU;EGF;ITGA2B;ITGB3;ITGB5;MMRN1;PDGFA;PF4;PPBP;PROS1;RAB6B;SE                    |
| purple | BP | GO:0044707  | single-multicellular organism process       | 17735 | 5398  | 134 | 67  | 41.21  | 5.20E-07 | 1.625819 | ABLIM3;ACSBG1;ADRA2A;ALOX12;AVPR1A;BMP6;CA2;CALD1;CAV2;CD9;CDKN1A;CLDN5;CLU;DNM3;EGF;ES                      |
| purple | CC | GO:0031410  | cytoplasmic vesicle                         | 17735 | 914   | 134 | 23  | 7.15   | 6.00E-07 | 3.216783 | ACRBP;ACSBG1;AVPR1A;CAV2;CD9;CLU;EGF;ITGA2B;ITGB3;ITGB5;MMRN1;PDGFA;PF4;PPBP;PROS1;RAB6B;                    |
| purple | BP | GO:0050896  | response to stimulus                        | 17735 | 6581  | 134 | 76  | 50.24  | 6.20E-07 | 1.512739 | ABLIM3;ACSBG1;ADRA2A;ALOX12;AQP10;ARHGAP6;ASAP2;AVPR1A;BMP6;CA2;CABP5;CAV2;CD9;CDKN1A;(                      |
| purple | CC | GO:0016023  | cytoplasmic membrane-bounded vesicle        | 17735 | 848   | 134 | 22  | 6.63   | 6.50E-07 | 3.31825  | ACRBP;ACSBG1;CAV2;CD9;CLU;EGF;ITGA2B;ITGB3;ITGB5;MMRN1;PDGFA;PF4;PPBP;PROS1;RAB6B;SELP;SER                   |
| purple | CC | GO:0031982  | vesicle                                     | 17735 | 993   | 134 | 24  | 7.76   | 6.80E-07 | 3.092784 | ACRBP;ACSBG1;AVPR1A;BMP6;CAV2;CD9;CLU;EGF;ITGA2B;ITGB3;ITGB5;MMRN1;PDGFA;PF4;PPBP;PROS1;S                    |
| purple | BP | GO:0044763  | single-organism cellular process            | 17735 | 9577  | 134 | 96  | 73.11  | 6.80E-07 | 1.31309  | ABCC3;ABLIM3;ACSBG1;ADRA2A;ALOX12;AQP10;ARHGAP6;ASAP2;AVPR1A;BMP6;CA2;CABP5;CALD1;CAV2;                      |
| purple | CC | GO:0071944  | cell periphery                              | 17735 | 4360  | 134 | 60  | 34.09  | 7.70E-07 | 1.760047 | ABCC3;ADRA2A;ALOX12;AQP10;ASAP2;AVPR1A;C2orf88;C6orf25;CA2;CALD1;CAV2;CD9;CLDN5;CLEC1B;CTT                   |
| purple | CC | GO:0005886  | plasma membrane                             | 17735 | 4273  | 134 | 59  | 33.41  | 9.20E-07 | 1.765938 | ABCC3;ADRA2A;ALOX12;AQP10;ASAP2;AVPR1A;C2orf88;C6orf25;CA2;CALD1;CAV2;CD9;CLDN5;CLEC1B;EGF                   |
| purple | BP | GO:0032501  | multicellular organismal process            | 17735 | 5593  | 134 | 67  | 42.69  | 2.30E-06 | 1.569454 | ABLIM3;ACSBG1;ADRA2A;ALOX12;AVPR1A;BMP6;CA2;CALD1;CAV2;CD9;CDKN1A;CLDN5;CLU;DNM3;EGF;ES                      |
| purple | BP | GO:0044221  | response to chemical stimulus               | 17735 | 2766  | 134 | 42  | 21.11  | 2.70E-06 | 1.989578 | ABLIM3;ACSBG1;ADRA2A;ALOX12;AQP10;ARHGAP6;ASAP2;AVPR1A;BMP6;CA2;CAV2;CD9;CDKN1A;CLU;CMTM5;CXCL5;GNG1         |
| purple | CC | GO:0016020  | membrane                                    | 17735 | 7690  | 134 | 86  | 60.13  | 3.80E-06 | 1.430234 | ABCC3;ADRA2A;ALOX12;AQP10;ASAP2;AVPR1A;C2orf88;C6orf25;CA2;CALD1;CAV2;CD9;CLDN5;CLEC1B;CLE                   |
| purple | BP | GO:0040111  | locomotion                                  | 17735 | 1253  | 134 | 25  | 9.56   | 6.40E-06 | 2.15063  | ABLIM3;ADRA2A;ALOX12;CMTM5;CXCL5;ESAM;GP6;GRB14;ITGA2B;ITGB3;MYL9;MYLK;PARD3;PDGFA;PDGF                      |
| purple | BP | GO:0030335  | positive regulation of cell migration       | 17735 | 223   | 134 | 10  | 1.7    | 7.90E-06 | 5.882353 | ADRA2A;ALOX12;ITGB3;MYLK;PDGFA;PDGFRA;SELP;SERPINE1;VEGFC;VIL1                                               |
| purple | BP | GO:2000147  | positive regulation of cell motility        | 17735 | 228   | 134 | 10  | 1.74   | 9.50E-06 | 5.747126 | ADRA2A;ALOX12;ITGB3;MYLK;PDGFA;PDGFRA;SELP;SERPINE1;VEGFC;VIL1                                               |
| purple | BP | GO:0044699  | single-organism process                     | 17735 | 10656 | 134 | 100 | 81.34  | 9.80E-06 | 1.229407 | ABCC3;ABLIM3;ACSBG1;ADRA2A;ALOX12;AQP10;ARHGAP6;ASAP2;AVPR1A;BMP6;CA2;CABP5;CALD1;CAV2;                      |
| purple | BP | GO:0051429  | establishment of localization in cell       | 17735 | 1820  | 134 | 31  | 13.89  | 1.00E-05 | 2.231821 | ADRA2A;AVPR1A;BMP6;CD9;CDKN1A;CLU;EGF;F2RL3;ITGA2B;ITGB3;MAOB;MAP1B;MMRN1;PARD3;PCSK6;                       |
| purple | BP | GO:0051672  | positive regulation of cellular componen... | 17735 | 234   | 134 | 10  | 1.79   | 1.20E-05 | 5.586592 | ADRA2A;ITGB3;MYLK;PDGFA;PDGFRA;SELP;SERPINE1;VEGFC;VIL1                                                      |
| purple | BP | GO:0040017  | positive regulation of locomotion           | 17735 | 237   | 134 | 10  | 1.81   | 1.30E-05 | 5.524862 | ADRA2A;ALOX12;ITGB3;MYLK;PDGFA;PDGFRA;SELP;SERPINE1;VEGFC;VIL1                                               |
| purple | BP | GO:0009719  | response to endogenous stimulus             | 17735 | 1063  | 134 | 22  | 8.11   | 1.50E-05 | 2.7127   | ACSBG1;ADRA2A;AVPR1A;BMP6;CA2;CAV2;CDKN1A;GNG11;HOMER2;LTBP1;MAOB;PARD3;PDGFA;PDGFRA                         |
| purple | BP | GO:0007154  | cell communication                          | 17735 | 4775  | 134 | 58  | 36.45  | 1.70E-05 | 1.591221 | ACSBG1;ADRA2A;ARHGAP6;ASAP2;AVPR1A;BMP6;CABP5;CAV2;CD9;CDKN1A;CLDN5;CLEC1B;CLU;CXCL5;EG                      |

|        |    |            |                                             |       |      |     |    |       |          |          |                                                                                              |
|--------|----|------------|---------------------------------------------|-------|------|-----|----|-------|----------|----------|----------------------------------------------------------------------------------------------|
| purple | MF | GO:0001664 | G-protein coupled receptor binding          | 17735 | 195  | 134 | 9  | 1.5   | 1.90E-05 | 6        | ADRA2A;AVPR1A;CAV2;CXCL5;GNAZ;HOMER2;PF4;PF4V1;PPBP                                          |
| purple | BP | GO:0023052 | signaling                                   | 17735 | 4666 | 134 | 57 | 35.62 | 1.90E-05 | 1.600225 | ACSBG1;ADRA2A;ARHGAP6;ASAP2;AVPR1A;BMP6;CABP5;CAV2;CD9;CDKN1A;CLDN5;CLEC1B;CLU;CXCL5;EG      |
| purple | BP | GO:0044700 | single organism signaling                   | 17735 | 4666 | 134 | 57 | 35.62 | 1.90E-05 | 1.600225 | ACSBG1;ADRA2A;ARHGAP6;ASAP2;AVPR1A;BMP6;CABP5;CAV2;CD9;CDKN1A;CLDN5;CLEC1B;CLU;CXCL5;EG      |
| purple | CC | GO:0030667 | secretory granule membrane                  | 17735 | 52   | 134 | 5  | 0.41  | 5.20E-05 | 12.19512 | CAV2;CD9;ITGA2B;ITGB3;SELP                                                                   |
| purple | BP | GO:0033993 | response to lipid                           | 17735 | 534  | 134 | 14 | 4.08  | 5.50E-05 | 3.431373 | ACSBG1;ALOX12;AVPR1A;BMP6;CA2;CDKN1A;MAOB;PDGFA;PTGES;SELP;SERPINE1;SLC6A4;SPARC;TNFSF4      |
| purple | BP | GO:1901700 | response to oxygen-containing compound      | 17735 | 755  | 134 | 17 | 5.76  | 5.60E-05 | 2.951389 | ADRA2A;AVPR1A;BMP6;CD9;CDKN1A;HOMER2;MAOB;PDGFA;PDGFRA;PTGES;SELP;SERPINE1;SLC6A4;SLC8A3     |
| purple | BP | GO:0042127 | regulation of cell proliferation            | 17735 | 1174 | 134 | 22 | 8.96  | 6.60E-05 | 2.455357 | ADRA2A;ALOX12;AVPR1A;BMP6;CAV2;CD9;CDKN1A;CXCL5;EGF;ITGB3;PDE5A;PDGFA;PDGFRA;PTGES;PTGS1     |
| purple | BP | GO:0051241 | negative regulation of multicellular org... | 17735 | 359  | 134 | 11 | 2.74  | 9.30E-05 | 4.014599 | ADRA2A;AVPR1A;GUCY1A3;MGLL;PDE5A;PDGFA;PDGFRA;PROS1;SERPINE1;SLC6A4;TNFSF4                   |
| purple | BP | GO:0044765 | single-organism transport                   | 17735 | 2753 | 134 | 38 | 21.02 | 9.30E-05 | 1.807802 | ADRA2A;AVPR1A;BMP6;CA2;CD9;CDKN1A;CLU;EGF;F2RL3;ITGA2B;ITGB3;KCND3;MAOB;MAP                  |
| purple | BP | GO:0051179 | localization                                | 17735 | 4195 | 134 | 51 | 32.02 | 9.30E-05 | 1.592755 | ABCC3;ADRA2A;ALOX12;AQP10;AVPR1A;BET3L;BMP6;CA2;CAV2;CD9;CDKN1A;CLU;DNM3;EGF;ESAM;F2RL3      |
| purple | CC | GO:0005615 | extracellular space                         | 17735 | 844  | 134 | 18 | 6.6   | 1.00E-04 | 2.727273 | BMP6;CA2;CLU;CMTM5;CXCL5;EGF;FSTL1;PCSK6;PDGFA;PF4;PKHD1L1;PPBP;SELP;SERPINE1;SPARC;TFPI;TNI |
| purple | BP | GO:0006928 | cellular component movement                 | 17735 | 1208 | 134 | 22 | 9.22  | 1.00E-04 | 2.386117 | ADRA2A;ALOX12;CALD1;CD9;ESAM;GP6;GRB14;ITGB3;MAP1B;MYLK;PARD3;PDGFA;PDGFRA;PF4;PROS1;SEI     |
| purple | MF | GO:0005102 | receptor binding                            | 17735 | 1201 | 134 | 22 | 9.22  | 1.00E-04 | 2.386117 | ADRA2A;AVPR1A;BMP6;CAV2;CD9;CMTM5;CXCL5;EGF;GNAZ;HOMER2;ITGB3;ITGB5;MAP1B;PDGFA;PF4;PF       |
| purple | BP | GO:0051641 | cellular localization                       | 17735 | 2049 | 134 | 31 | 15.64 | 1.00E-04 | 1.982097 | ADRA2A;AVPR1A;BMP6;CD9;CDKN1A;CLU;EGF;F2RL3;ITGA2B;ITGB3;MAOB;MAP1B;MMRN1;PDGFA;PCSK6;       |
| purple | BP | GO:0030193 | regulation of blood coagulation             | 17735 | 62   | 134 | 5  | 0.47  | 0.00011  | 10.6383  | PDGFA;PDGFRA;PROS1;SELP;SERPINE1                                                             |
| purple | BP | GO:1900046 | regulation of hemostasis                    | 17735 | 62   | 134 | 5  | 0.47  | 0.00011  | 10.6383  | PDGFA;PDGFRA;PROS1;SELP;SERPINE1                                                             |
| purple | BP | GO:0071363 | cellular response to growth factor stimu... | 17735 | 433  | 134 | 12 | 3.31  | 0.00011  | 3.625378 | CAV2;ITGB3;LTBP1;PARD3;PDGFA;PDGFRA;PRKAR2B;SERPINE1;SPARC;TGFBI1;VEGFC;VIL1                 |
| purple | MF | GO:0005161 | platelet-derived growth factor receptor ... | 17735 | 13   | 134 | 3  | 0.1   | 0.00012  | 30       | ITGB3;PDGFA;PDGFRA                                                                           |
| purple | BP | GO:0010033 | response to organic substance               | 17735 | 1870 | 134 | 29 | 14.27 | 0.00012  | 2.032235 | ACSBG1;ADRA2A;ALOX12;AVPR1A;BMP6;CA2;CAV2;CDKN1A;CLU;GNG11;HOMER2;ITGB3;LTBP1;MAOB;PAF       |
| purple | BP | GO:0048545 | response to steroid hormone stimulus        | 17735 | 254  | 134 | 9  | 1.94  | 0.00014  | 4.639175 | ACSBG1;AVPR1A;BMP6;CA2;CDKN1A;MAOB;PDGFA;SLC6A4;SPARC                                        |
| purple | BP | GO:0014070 | response to organic cyclic compound         | 17735 | 513  | 134 | 13 | 3.92  | 0.00014  | 3.316327 | ACSBG1;AVPR1A;BMP6;CA2;CDKN1A;HOMER2;MAOB;PDGFA;PRKAR2B;PTGES;SLC6A4;SLC8A3;SPARC            |
| purple | BP | GO:0009605 | response to external stimulus               | 17735 | 1238 | 134 | 22 | 9.45  | 0.00014  | 2.328042 | ABLIM3;AVPR1A;CDKN1A;CMTM5;CXCL5;ITGA2B;ITGB3;MGLL;MYL9;PDGFA;PDGFRA;PF4;PGRMC1;PLXNB3;      |
| purple | BP | GO:0050900 | leukocyte migration                         | 17735 | 257  | 134 | 9  | 1.96  | 0.00015  | 4.591837 | ESAM;GP6;GRB14;ITGB3;PF4;PROS1;SELP;SERPINE1;VEGFC                                           |
| purple | BP | GO:0070848 | response to growth factor stimulus          | 17735 | 446  | 134 | 12 | 3.4   | 0.00015  | 3.529412 | CAV2;ITGB3;LTBP1;PARD3;PDGFA;PDGFRA;PRKAR2B;SERPINE1;SPARC;TGFBI1;VEGFC;VIL1                 |
| purple | BP | GO:0006810 | transport                                   | 17735 | 3358 | 134 | 43 | 25.63 | 0.00015  | 1.677721 | ABCC3;ADRA2A;AQP10;AVPR1A;BET3L;BMP6;CA2;CAV2;CD9;CDKN1A;CLU;DNM3;EGF;F2RL3;ITGA2B;ITGB3     |
| purple | BP | GO:0050818 | regulation of coagulation                   | 17735 | 67   | 134 | 5  | 0.51  | 0.00016  | 9.803922 | PDGFA;PDGFRA;PROS1;SELP;SERPINE1                                                             |
| purple | BP | GO:0008277 | regulation of G-protein coupled receptor... | 17735 | 106  | 134 | 6  | 0.81  | 0.00016  | 7.407407 | ADRA2A;CAV2;GRK5;HOMER2;MGLL;RGS6                                                            |
| purple | BP | GO:0006935 | chemotaxis                                  | 17735 | 596  | 134 | 14 | 4.55  | 0.00017  | 3.076923 | ABLIM3;CMTM5;CXCL5;ITGA2B;ITGB3;MYL9;PDGFA;PDGFRA;PF4;PGRMC1;PLXNB3;PPBP;SERPINE1;VEGFC      |
| purple | BP | GO:0042330 | taxis                                       | 17735 | 596  | 134 | 14 | 4.55  | 0.00017  | 3.076923 | ABLIM3;CMTM5;CXCL5;ITGA2B;ITGB3;MYL9;PDGFA;PDGFRA;PF4;PGRMC1;PLXNB3;PPBP;SERPINE1;VEGFC      |
| purple | BP | GO:0051384 | response to glucocorticoid stimulus         | 17735 | 108  | 134 | 6  | 0.82  | 0.00018  | 7.317073 | ACSBG1;AVPR1A;BMP6;CDKN1A;MAOB;SPARC                                                         |
| purple | BP | GO:0030334 | regulation of cell migration                | 17735 | 392  | 134 | 11 | 2.99  | 2.00E-04 | 3.67893  | ADRA2A;ALOX12;ITGB3;MYLK;PDGFA;PDGFRA;SELP;SERPINE1;TPM1;VEGFC;VIL1                          |
| purple | BP | GO:0006690 | icosanoid metabolic process                 | 17735 | 71   | 134 | 5  | 0.54  | 0.00021  | 9.259259 | ALOX12;AVPR1A;MGLL;PTGES;PTGS1                                                               |
| purple | BP | GO:1901568 | fatty acid derivative metabolic process     | 17735 | 71   | 134 | 5  | 0.54  | 0.00021  | 9.259259 | ALOX12;AVPR1A;MGLL;PTGES;PTGS1                                                               |
| purple | BP | GO:0032879 | regulation of localization                  | 17735 | 1361 | 134 | 23 | 10.39 | 0.00021  | 2.213667 | ADRA2A;ALOX12;AVPR1A;BMP6;CDKN1A;EGF;F2RL3;ITGB3;MAOB;MAP1B;MYLK;PARD3;PDGFA;PDGFRA;PF       |
| purple | BP | GO:0030195 | negative regulation of blood coagulation    | 17735 | 39   | 134 | 4  | 0.3   | 0.00022  | 13.33333 | PDGFA;PDGFRA;PROS1;SERPINE1                                                                  |
| purple | BP | GO:1900047 | negative regulation of hemostasis           | 17735 | 39   | 134 | 4  | 0.3   | 0.00022  | 13.33333 | PDGFA;PDGFRA;PROS1;SERPINE1                                                                  |
| purple | BP | GO:0016477 | cell migration                              | 17735 | 844  | 134 | 17 | 6.44  | 0.00022  | 2.639752 | ADRA2A;ALOX12;ESAM;GP6;GRB14;ITGB3;MYLK;PARD3;PDGFA;PDGFRA;PF4;PROS1;SELP;SERPINE1;TPM1;V    |
| purple | BP | GO:0051234 | establishment of localization               | 17735 | 3408 | 134 | 43 | 26.02 | 0.00022  | 1.652575 | ABCC3;ADRA2A;AQP10;AVPR1A;BET3L;BMP6;CA2;CAV2;CD9;CDKN1A;CLU;DNM3;EGF;F2RL3;ITGA2B;ITGB3     |
| purple | BP | GO:0031960 | response to corticosteroid stimulus         | 17735 | 114  | 134 | 6  | 0.87  | 0.00024  | 6.896552 | ACSBG1;AVPR1A;BMP6;CDKN1A;MAOB;SPARC                                                         |
| purple | BP | GO:0007178 | transmembrane receptor protein serine/th... | 17735 | 273  | 134 | 9  | 2.08  | 0.00024  | 4.326923 | BMP6;CAV2;FSTL1;LTBP1;PARD3;PCSK6;PDGFA;SERPINE1;TGFBI1                                      |
| purple | BP | GO:0051412 | response to corticosterone stimulus         | 17735 | 17   | 134 | 3  | 0.13  | 0.00027  | 23.07692 | AVPR1A;CDKN1A;MAOB                                                                           |
| purple | CC | GO:0044459 | plasma membrane part                        | 17735 | 1895 | 134 | 29 | 14.82 | 0.00028  | 1.956815 | ABCC3;ADRA2A;AVPR1A;CA2;CAV2;CD9;CLEC1B;F2RL3;GNAZ;GNG11;GP6;GP9;ITGA2B;ITGB3;ITGB5;KCND3    |
| purple | BP | GO:0050819 | negative regulation of coagulation          | 17735 | 42   | 134 | 4  | 0.32  | 0.00029  | 12.5     | PDGFA;PDGFRA;PROS1;SERPINE1                                                                  |
| purple | MF | GO:1901681 | sulfur compound binding                     | 17735 | 167  | 134 | 7  | 1.28  | 3.00E-04 | 5.46875  | C6orf25;FSTL1;PCSK6;PF4;PF4V1;PTGES;SELP                                                     |
| purple | BP | GO:2000145 | regulation of cell motility                 | 17735 | 414  | 134 | 11 | 3.16  | 0.00032  | 3.481013 | ADRA2A;ALOX12;ITGB3;MYLK;PDGFA;PDGFRA;SELP;SERPINE1;TPM1;VEGFC;VIL1                          |
| purple | BP | GO:0008015 | blood circulation                           | 17735 | 349  | 134 | 10 | 2.66  | 0.00034  | 3.759398 | ADRA2A;ALOX12;AVPR1A;GUCY1A3;GUCY1B3;PDE5A;PTGS1;SLC6A4;TPM1;VEGFC                           |
| purple | BP | GO:0003013 | circulatory system process                  | 17735 | 350  | 134 | 10 | 2.67  | 0.00034  | 3.745318 | ADRA2A;ALOX12;AVPR1A;GUCY1A3;GUCY1B3;PDE5A;PTGS1;SLC6A4;TPM1;VEGFC                           |
| purple | BP | GO:0032231 | regulation of actin filament bundle asse... | 17735 | 44   | 134 | 4  | 0.34  | 0.00035  | 11.76471 | ARHGAP6;SDC4;TPM1;VIL1                                                                       |
| purple | MF | GO:0005080 | protein kinase C binding                    | 17735 | 44   | 134 | 4  | 0.34  | 0.00035  | 11.76471 | AVPR1A;GRK5;PARD3;SDC4                                                                       |
| purple | BP | GO:0007167 | enzyme linked receptor protein signaling... | 17735 | 884  | 134 | 17 | 6.75  | 0.00037  | 2.518519 | ADRA2A;BMP6;CAV2;EGF;FSTL1;GP6;ITGB3;LTBP1;PARD3;PCSK6;PDGFA;PDGFRA;PRKAR2B;SERPINE1;TGFBI1  |
| purple | BP | GO:0045932 | negative regulation of muscle contractio... | 17735 | 19   | 134 | 3  | 0.15  | 0.00038  | 20       | ADRA2A;GUCY1A3;PDE5A                                                                         |
| purple | CC | GO:0032432 | actin filament bundle                       | 17735 | 44   | 134 | 4  | 0.34  | 0.00038  | 11.76471 | MYL9;MYLK;TPM1;VIL1                                                                          |
| purple | BP | GO:0051239 | regulation of multicellular organismal p... | 17735 | 1804 | 134 | 27 | 13.77 | 0.00039  | 1.960784 | ADRA2A;ALOX12;AVPR1A;BMP6;CA2;EGF;GUCY1A3;ITGB3;MAP1B;MEIS1;MGLL;MYL9;PDE5A;PDGFA;PDGF       |
| purple | MF | GO:0005188 | collagen binding                            | 17735 | 46   | 134 | 4  | 0.35  | 0.00042  | 11.42857 | GP6;PDGFA;SPARC;VWF                                                                          |
| purple | CC | GO:0009986 | cell surface                                | 17735 | 485  | 134 | 12 | 3.79  | 0.00042  | 3.166227 | CAV2;CD9;ITGA2B;PCSK6;PDGFA;PDGFRA;PGRMC1;SDC4;SELP;TNFSF4;TREM1;VWF                         |
| purple | BP | GO:0033559 | unsaturated fatty acid metabolic process    | 17735 | 83   | 134 | 5  | 0.63  | 0.00043  | 7.936508 | ALOX12;AVPR1A;MGLL;PTGES;PTGS1                                                               |
| purple | CC | GO:0005887 | integral to plasma membrane                 | 17735 | 1208 | 134 | 21 | 9.45  | 0.00044  | 2.222222 | ABCC3;ADRA2A;AVPR1A;CAV2;CD9;CLEC1B;F2RL3;GP6;GP9;ITGA2B;ITGB3;ITGB5;KCND3;MMD;PDGFA;SD      |
| purple | BP | GO:0042552 | myelination                                 | 17735 | 84   | 134 | 5  | 0.64  | 0.00045  | 7.8125   | ACSBG1;CD9;CLDN5;SH3TC2;WASF3                                                                |
| purple | BP | GO:0072376 | protein activation cascade                  | 17735 | 84   | 134 | 5  | 0.64  | 0.00045  | 7.8125   | CLU;GP9;PROS1;TFPI;VWF                                                                       |
| purple | MF | GO:0008201 | heparin binding                             | 17735 | 128  | 134 | 6  | 0.98  | 0.00045  | 6.122449 | C6orf25;FSTL1;PCSK6;PF4;PF4V1;SELP                                                           |
| purple | CC | GO:0044421 | extracellular region part                   | 17735 | 1123 | 134 | 20 | 8.78  | 0.00045  | 2.277904 | BMP6;CA2;CLU;CMTM5;CXCL5;EGF;FSTL1;LTBP1;PCSK6;PDGFA;PF4;PKHD1L1;PPBP;SELP;SERPINE1;SPARC;T  |
| purple | MF | GO:0008009 | chemokine activity                          | 17735 | 47   | 134 | 4  | 0.36  | 0.00046  | 11.11111 | CXCL5;PF4;PF4V1;PPBP                                                                         |
| purple | BP | GO:0051716 | cellular response to stimulus               | 17735 | 5052 | 134 | 56 | 38.56 | 0.00046  | 1.452282 | ADRA2A;ALOX12;ARHGAP6;ASAP2;AVPR1A;BMP6;CABP5;CAV2;CDKN1A;CLEC1B;CLU;CXCL5;EGF;F2RL3;FST     |
| purple | BP | GO:0008284 | positive regulation of cell proliferatio... | 17735 | 662  | 134 | 14 | 5.05  | 0.00051  | 2.772277 | ADRA2A;ALOX12;AVPR1A;BMP6;CAV2;CDKN1A;CXCL5;EGF;ITGB3;PDGFA;PDGFRA;TNFSF4;TSC2D21;VEGFC      |
| purple | BP | GO:0001516 | prostaglandin biosynthetic process          | 17735 | 21   | 134 | 3  | 0.16  | 0.00052  | 18.75    | AVPR1A;PTGES;PTGS1                                                                           |
| purple | BP | GO:0046457 | prostanoid biosynthetic process             | 17735 | 21   | 134 | 3  | 0.16  | 0.00052  | 18.75    | AVPR1A;PTGES;PTGS1                                                                           |
| purple | BP | GO:0051385 | response to mineralocorticoid stimulus      | 17735 | 21   | 134 | 3  | 0.16  | 0.00052  | 18.75    | AVPR1A;CDKN1A;MAOB                                                                           |
| purple | BP | GO:0072378 | blood coagulation, fibrin clot formation    | 17735 | 21   | 134 | 3  | 0.16  | 0.00052  | 18.75    | GP9;TFPI;VWF                                                                                 |
| purple | BP | GO:0007272 | ensheathment of neurons                     | 17735 | 87   | 134 | 5  | 0.66  | 0.00053  | 7.575758 | ACSBG1;CD9;CLDN5;SH3TC2;WASF3                                                                |



|        |    |             |                                             |       |      |     |    |       |          |          |                                                                                              |
|--------|----|-------------|---------------------------------------------|-------|------|-----|----|-------|----------|----------|----------------------------------------------------------------------------------------------|
| purple | BP | GO:0008366  | axon ensheathment                           | 17735 | 87   | 134 | 5  | 0.66  | 0.00053  | 7.575758 | ACSBG1;CD9;CLDN5;SH3TC2;WASF3                                                                |
| purple | BP | GO:0006633  | fatty acid biosynthetic process             | 17735 | 134  | 134 | 6  | 1.02  | 0.00056  | 5.882353 | ALOX12;AVPR1A;ELOVL7;MGLL;PTGES;PTGS1                                                        |
| purple | BP | GO:0048870  | cell motility                               | 17735 | 916  | 134 | 17 | 6.99  | 0.00056  | 2.432046 | ADRA2A;ALOX12;ESAM;GP6;GRB14;ITGB3;MYLK;PARD3;PDGFA;PDGFRA;PF4;PROS1;SELP;SERPINE1;TPM1;VIL1 |
| purple | BP | GO:0051674  | localization of cell                        | 17735 | 916  | 134 | 17 | 6.99  | 0.00056  | 2.432046 | ADRA2A;ALOX12;ESAM;GP6;GRB14;ITGB3;MYLK;PARD3;PDGFA;PDGFRA;PF4;PROS1;SELP;SERPINE1;TPM1;VIL1 |
| purple | BP | GO:0046456  | icosanoid biosynthetic process              | 17735 | 51   | 134 | 4  | 0.39  | 0.00061  | 10.25641 | ALOX12;AVPR1A;PTGES;PTGS1                                                                    |
| purple | BP | GO:1901570  | fatty acid derivative biosynthetic proce... | 17735 | 51   | 134 | 4  | 0.39  | 0.00061  | 10.25641 | ALOX12;AVPR1A;PTGES;PTGS1                                                                    |
| purple | BP | GO:0040012  | regulation of locomotion                    | 17735 | 448  | 134 | 11 | 3.42  | 0.00062  | 3.216374 | ADRA2A;ALOX12;ITGB3;MYLK;PDGFA;PDGFRA;SELP;SERPINE1;TPM1;VEGFC;VIL1                          |
| purple | CC | GO:0031234  | extrinsic to internal side of plasma mem... | 17735 | 51   | 134 | 4  | 0.4   | 0.00067  | 10       | CAV2;GNAZ;GNG11;RGS6                                                                         |
| purple | BP | GO:0010543  | regulation of platelet activation           | 17735 | 23   | 134 | 3  | 0.18  | 0.00069  | 16.66667 | PDGFA;PDGFRA;SELP                                                                            |
| purple | BP | GO:0007165  | signal transduction                         | 17735 | 4165 | 134 | 48 | 31.79 | 0.00069  | 1.509909 | ADRA2A;ARHGAP6;ASAP2;AVPR1A;BMP6;CABP5;CAV2;CDKN1A;CLEC1B;CLU;CXCL5;EGF;F2RL3;FSTL1;GNAZ     |
| purple | CC | GO:0031226  | intrinsic to plasma membrane                | 17735 | 1252 | 134 | 21 | 9.79  | 7.00E-04 | 2.145046 | ABCC3;ADRA2A;AVPR1A;CAV2;CD9;CLEC1B;F2RL3;GP6;GP9;ITGA2B;ITGB3;ITGB5;KCND3;MMD;PDGFRA;SDC4   |
| purple | BP | GO:0006636  | unsaturated fatty acid biosynthetic proc... | 17735 | 55   | 134 | 4  | 0.42  | 0.00081  | 9.52381  | ALOX12;AVPR1A;PTGES;PTGS1                                                                    |
| purple | BP | GO:0051270  | regulation of cellular component movemen... | 17735 | 463  | 134 | 11 | 3.53  | 0.00082  | 3.116147 | ADRA2A;ALOX12;ITGB3;MYLK;PDGFA;PDGFRA;SELP;SERPINE1;TPM1;VEGFC;VIL1                          |
| purple | MF | GO:0042379  | chemokine receptor binding                  | 17735 | 55   | 134 | 4  | 0.42  | 0.00083  | 9.52381  | CXCL5;PF4;PF4V1;PPBP                                                                         |
| purple | BP | GO:0006936  | muscle contraction                          | 17735 | 262  | 134 | 8  | 2     | 0.00089  | 4        | ADRA2A;CALD1;GUCY1A3;ITGB5;MYL9;MYLK;PDE5A;TPM1                                              |
| purple | MF | GO:0070851  | growth factor receptor binding              | 17735 | 97   | 134 | 5  | 0.74  | 9.00E-04 | 6.756757 | EGF;ITGB3;PDGFA;PDGFRA;VEGFC                                                                 |
| purple | CC | GO:0044425  | membrane part                               | 17735 | 6026 | 134 | 65 | 47.12 | 9.00E-04 | 1.379457 | ABCC3;ADRA2A;AQIP10;AVPR1A;C6orf25;CA2;CAV2;CD9;CLDN5;CLEC1B;CLEC2L;CMTM5;EGF;ELOVL7;ESAM    |
| purple | BP | GO:0007155  | cell adhesion                               | 17735 | 957  | 134 | 17 | 7.31  | 0.00091  | 2.325581 | ALOX12;ARHGAP6;CD9;CLDN5;ESAM;GP9;ITGA2B;ITGB3;ITGB5;MMRN1;PDGFRA;SDC4;SELP;SERPINE1;TGFB1   |
| purple | BP | GO:0022610  | biological adhesion                         | 17735 | 959  | 134 | 17 | 7.32  | 0.00093  | 2.322404 | ALOX12;ARHGAP6;CD9;CLDN5;ESAM;GP9;ITGA2B;ITGB3;ITGB5;MMRN1;PDGFRA;SDC4;SELP;SERPINE1;TGFB1   |
| purple | BP | GO:0007160  | cell-matrix adhesion                        | 17735 | 148  | 134 | 6  | 1.13  | 0.00095  | 5.309735 | ARHGAP6;ITGA2B;ITGB3;ITGB5;SDC4;SERPINE1                                                     |
| purple | CC | GO:0005576  | extracellular region                        | 17735 | 2141 | 134 | 30 | 16.74 | 0.00095  | 1.792159 | ACSBP;BMP6;C2orf88;CA2;CCDC3;CLU;CMTM5;CXCL5;EGF;ENDOD1;F2RL3;FSTL1;FSTL4;LTBP1;MMRN1;PCSK6  |
| purple | MF | GO:0005125  | cytokine activity                           | 17735 | 204  | 134 | 7  | 1.57  | 0.00099  | 4.458599 | BMP6;CMTM5;CXCL5;PF4;PF4V1;PPBP;TNFSF4                                                       |
| purple | BP | GO:0071495  | cellular response to endogenous stimulus    | 17735 | 716  | 134 | 14 | 5.47  | 0.00109  | 2.559415 | ADRA2A;CAV2;GNG11;LTBP1;PARD3;PDGFA;PDGFRA;PRKAR2B;SERPINE1;SLC6A4;SLC8A3;TGFB11;TNFSF4      |
| purple | BP | GO:0019228  | regulation of action potential in neuron    | 17735 | 103  | 134 | 5  | 0.79  | 0.00114  | 6.329114 | ACSBG1;CD9;CLDN5;SH3TC2;WASF3                                                                |
| purple | BP | GO:0023051  | regulation of signaling                     | 17735 | 2036 | 134 | 28 | 15.54 | 0.00115  | 1.801802 | ADRA2A;ARHGAP6;ASAP2;AVPR1A;BMP6;CAV2;CLU;EGF;GRK5;HOMER2;ITGB3;LTBP1;MAOB;MGLL;PCSK6;f      |
| purple | BP | GO:0032970  | regulation of actin filament-based proce... | 17735 | 211  | 134 | 7  | 1.61  | 0.00116  | 4.347826 | ARHGAP6;PARD3;PDGFA;PDGFRA;SDC4;TPM1;VIL1                                                    |
| purple | BP | GO:0009617  | response to bacterium                       | 17735 | 341  | 134 | 9  | 2.6   | 0.0012   | 3.461538 | HIST1H2BJ;MAOB;PPBP;PTGES;SELP;SERPINE1;SPARC;TNFSF4;VIL1                                    |
| purple | BP | GO:0010646  | regulation of cell communication            | 17735 | 2042 | 134 | 28 | 15.59 | 0.00121  | 1.796023 | ADRA2A;ARHGAP6;ASAP2;AVPR1A;BMP6;CAV2;CLU;EGF;GRK5;HOMER2;ITGB3;LTBP1;MAOB;MGLL;PCSK6;f      |
| purple | BP | GO:0008283  | cell proliferation                          | 17735 | 1542 | 134 | 23 | 11.77 | 0.00122  | 1.954121 | ADRA2A;ALOX12;AVPR1A;BMP6;CAV2;CD9;CDKN1A;CXCL5;EGF;GF11;ITGB3;PDE5A;PDGFA;PDGFRA;PTGES      |
| purple | BP | GO:0010863  | positive regulation of phospholipase C a... | 17735 | 62   | 134 | 4  | 0.47  | 0.00128  | 8.510638 | ARHGAP6;AVPR1A;PDGFRA;PRKAR2B                                                                |
| purple | BP | GO:0009725  | response to hormone stimulus                | 17735 | 647  | 134 | 13 | 4.94  | 0.00129  | 2.631579 | ACSBG1;ADRA2A;AVPR1A;BMP6;CA2;CDKN1A;GNG11;MAOB;PDGFA;PRKAR2B;SLC6A4;SPARC;TNFSF4            |
| purple | MF | GO:0005126  | cytokine receptor binding                   | 17735 | 215  | 134 | 7  | 1.65  | 0.00134  | 4.242424 | CXCL5;ITGB3;PF4;PF4V1;PPBP;TNFSF4;VEGFC                                                      |
| purple | BP | GO:0032846  | positive regulation of homeostatic proce... | 17735 | 63   | 134 | 4  | 0.48  | 0.00135  | 8.333333 | ALOX12;AVPR1A;CA2;F2RL3                                                                      |
| purple | BP | GO:1900274  | regulation of phospholipase C activity      | 17735 | 63   | 134 | 4  | 0.48  | 0.00135  | 8.333333 | ARHGAP6;AVPR1A;PDGFRA;PRKAR2B                                                                |
| purple | BP | GO:0006692  | prostanoid metabolic process                | 17735 | 29   | 134 | 3  | 0.22  | 0.00137  | 13.63636 | AVPR1A;PTGES;PTGS1                                                                           |
| purple | BP | GO:0006693  | prostaglandin metabolic process             | 17735 | 29   | 134 | 3  | 0.22  | 0.00137  | 13.63636 | AVPR1A;PTGES;PTGS1                                                                           |
| purple | CC | GO:0008305  | integrin complex                            | 17735 | 29   | 134 | 3  | 0.23  | 0.00147  | 13.04348 | ITGA2B;ITGB3;ITGB5                                                                           |
| purple | BP | GO:0031589  | cell-substrate adhesion                     | 17735 | 221  | 134 | 7  | 1.69  | 0.00152  | 4.142012 | ARHGAP6;ITGA2B;ITGB3;ITGB5;SDC4;SERPINE1;VWF                                                 |
| purple | BP | GO:0050880  | regulation of blood vessel size             | 17735 | 110  | 134 | 5  | 0.84  | 0.00153  | 5.952381 | ADRA2A;ALOX12;AVPR1A;GUCY1A3;SLC6A4                                                          |
| purple | MF | GO:0046983  | protein dimerization activity               | 17735 | 909  | 134 | 16 | 6.98  | 0.00155  | 2.292264 | ADRA2A;BMP6;CAV2;GUCY1B3;HIST1H2AG;HIST1H2BH;HIST1H2BJ;HOMER2;MAOB;MEIS1;MGLL;PDGFA;PC       |
| purple | BP | GO:0035150  | regulation of tube size                     | 17735 | 111  | 134 | 5  | 0.85  | 0.0016   | 5.882353 | ADRA2A;ALOX12;AVPR1A;GUCY1A3;SLC6A4                                                          |
| purple | MF | GO:0046982  | protein heterodimerization activity         | 17735 | 354  | 134 | 9  | 2.72  | 0.00162  | 3.308824 | ADRA2A;BMP6;GUCY1B3;HIST1H2AG;HIST1H2BH;HIST1H2BJ;HOMER2;MEIS1;PDGFA                         |
| purple | BP | GO:0006937  | regulation of muscle contraction            | 17735 | 112  | 134 | 5  | 0.85  | 0.00166  | 5.882353 | ADRA2A;GUCY1A3;MYL9;PDE5A;TPM1                                                               |
| purple | BP | GO:0014909  | smooth muscle cell migration                | 17735 | 31   | 134 | 3  | 0.24  | 0.00167  | 12.5     | ITGB3;PDGFA;SERPINE1                                                                         |
| purple | BP | GO:0032233  | positive regulation of actin filament bu... | 17735 | 31   | 134 | 3  | 0.24  | 0.00167  | 12.5     | SDC4;TPM1;VIL1                                                                               |
| purple | BP | GO:0015837  | amine transport                             | 17735 | 67   | 134 | 4  | 0.51  | 0.0017   | 7.843137 | ADRA2A;AVPR1A;MAOB;SLC6A4                                                                    |
| purple | BP | GO:0065007  | biological regulation                       | 17735 | 8616 | 134 | 81 | 65.77 | 0.00176  | 1.231565 | ABLIM3;ACSBG1;ADRA2A;ALOX12;ARHGAP6;ASAP2;AVPR1A;BMP6;CA2;CABP5;CAV2;CD9;CDKN1A;CLDN5;(      |
| purple | BP | GO:0060341  | regulation of cellular localization         | 17735 | 672  | 134 | 13 | 5.13  | 0.00181  | 2.534113 | ADRA2A;AVPR1A;BMP6;CDKN1A;EGF;F2RL3;MAOB;MAP1B;PARD3;PRKAR2B;SYTL4;TNFSF4;VEGFC              |
| purple | BP | GO:0003012  | muscle system process                       | 17735 | 294  | 134 | 8  | 2.24  | 0.00185  | 3.571429 | ADRA2A;CALD1;GUCY1A3;ITGB5;MYL9;MYLK;PDE5A;TPM1                                              |
| purple | MF | GO:0005515  | protein binding                             | 17735 | 7306 | 134 | 72 | 56.07 | 0.00195  | 1.284109 | ABLIM3;ADRA2A;ALOX12;ARHGAP6;ASAP2;AVPR1A;BMP6;CALD1;CAV2;CD9;CDKN1A;CLDN5;CLEC1B;CLU;C      |
| purple | BP | GO:0007179  | transforming growth factor beta receptor... | 17735 | 171  | 134 | 6  | 1.31  | 0.00198  | 4.580153 | CAV2;LTBP1;PARD3;PDGFA;SERPINE1;TGFB11                                                       |
| purple | BP | GO:0051970  | negative regulation of transmission of n... | 17735 | 33   | 134 | 3  | 0.25  | 0.002    | 12       | AVPR1A;MGLL;SLC6A4                                                                           |
| purple | CC | GO:0044444  | cytoplasmic part                            | 17735 | 6562 | 134 | 68 | 51.31 | 0.00201  | 1.325278 | ACSBG1;ALOX12;ARHGAP6;ASAP2;AVPR1A;BET3L;C6orf25;CA2;CABP5;CALD1;CAV2;CCDC3;CD9;CDK          |
| purple | MF | GO:0005539  | glycosaminoglycan binding                   | 17735 | 171  | 134 | 6  | 1.31  | 0.00204  | 4.580153 | C6orf25;FSTL1;PCSK6;PF4;PF4V1;SELP                                                           |
| purple | BP | GO:0070887  | cellular response to chemical stimulus      | 17735 | 1709 | 134 | 24 | 13.05 | 0.00213  | 1.83908  | ADRA2A;ALOX12;AVPR1A;CAV2;GNG11;ITGB3;LTBP1;MAOB;PARD3;PDGFA;PDGFRA;PF4;PRKAR2B;PTGS1;S      |
| purple | BP | GO:0051240  | positive regulation of multicellular org... | 17735 | 524  | 134 | 11 | 4     | 0.00219  | 2.75     | ADRA2A;ALOX12;AVPR1A;BMP6;CA2;PDE5A;PF4;SERPINE1;TNFSF4;TPM1;WASF3                           |
| purple | BP | GO:0044057  | regulation of system process                | 17735 | 448  | 134 | 10 | 3.42  | 0.00224  | 2.923977 | ADRA2A;ALOX12;AVPR1A;GUCY1A3;MGLL;MYL9;PDE5A;SLC6A4;TPM1;WASF3                               |
| purple | BP | GO:0010518  | positive regulation of phospholipase act... | 17735 | 73   | 134 | 4  | 0.56  | 0.00234  | 7.142857 | ARHGAP6;AVPR1A;PDGFRA;PRKAR2B                                                                |
| purple | BP | GO:0014812  | muscle cell migration                       | 17735 | 35   | 134 | 3  | 0.27  | 0.00237  | 11.11111 | ITGB3;PDGFA;SERPINE1                                                                         |
| purple | BP | GO:0006631  | fatty acid metabolic process                | 17735 | 307  | 134 | 8  | 2.34  | 0.00243  | 3.418803 | ACSBG1;ALOX12;AVPR1A;ELOVL7;MGLL;PRKAR2B;PTGES;PTGS1                                         |
| purple | BP | GO:00071936 | regulation of cerebellar granule cell pr... | 17735 | 10   | 134 | 2  | 0.08  | 0.0025   | 25       | EGF;SLC6A4                                                                                   |
| purple | BP | GO:0045741  | positive regulation of epidermal growth ... | 17735 | 10   | 134 | 2  | 0.08  | 0.0025   | 25       | ADRA2A;EGF                                                                                   |
| purple | MF | GO:0019001  | guanyl nucleotide binding                   | 17735 | 380  | 134 | 9  | 2.92  | 0.00262  | 3.082192 | DNM3;GNAZ;GUCY1A3;GUCY1B3;PDE5A;RAB6B;RHOBTB1;TUBA8;TUBB1                                    |
| purple | MF | GO:0032561  | guanyl ribonucleotide binding               | 17735 | 380  | 134 | 9  | 2.92  | 0.00262  | 3.082192 | DNM3;GNAZ;GUCY1A3;GUCY1B3;PDE5A;RAB6B;RHOBTB1;TUBA8;TUBB1                                    |
| purple | BP | GO:0032956  | regulation of actin cytoskeleton organiz... | 17735 | 182  | 134 | 6  | 1.39  | 0.00271  | 4.136547 | ARHGAP6;PDGFA;PDGFRA;SDC4;TPM1;VIL1                                                          |
| purple | CC | GO:0005834  | heterotrimeric G-protein complex            | 17735 | 36   | 134 | 3  | 0.28  | 0.00276  | 10.71429 | GNAZ;GNG11;RGS6                                                                              |
| purple | BP | GO:0051048  | negative regulation of secretion            | 17735 | 126  | 134 | 5  | 0.96  | 0.00278  | 5.208333 | ADRA2A;EGF;MAOB;SYTL4;TNFSF4                                                                 |
| purple | BP | GO:0022607  | cellular component assembly                 | 17735 | 1545 | 134 | 22 | 11.79 | 0.00284  | 1.865988 | ARHGAP6;CAV2;CD9;CLU;DNM3;EGF;HIST1H2AG;HIST1H2BH;HIST1H2BJ;KCND3;MYLK;PARD3;PDGFA;SDC4;     |
| purple | BP | GO:0048146  | positive regulation of fibroblast prolif... | 17735 | 38   | 134 | 3  | 0.29  | 0.00301  | 10.34483 | CDKN1A;PDGFA;PDGFRA                                                                          |

|        |    |            |                                             |       |      |     |    |       |         |          |                                                                                            |
|--------|----|------------|---------------------------------------------|-------|------|-----|----|-------|---------|----------|--------------------------------------------------------------------------------------------|
| purple | BP | GO:0006837 | serotonin transport                         | 17735 | 11   | 134 | 2  | 0.08  | 0.00304 | 25       | MAOB;SLC6A4                                                                                |
| purple | BP | GO:0021924 | cell proliferation in external granule l... | 17735 | 11   | 134 | 2  | 0.08  | 0.00304 | 25       | EGF;SLC6A4                                                                                 |
| purple | BP | GO:0021930 | cerebellar granule cell precursor prolif... | 17735 | 11   | 134 | 2  | 0.08  | 0.00304 | 25       | EGF;SLC6A4                                                                                 |
| purple | BP | GO:0045601 | regulation of endothelial cell different... | 17735 | 11   | 134 | 2  | 0.08  | 0.00304 | 25       | ALOX12;BMP6                                                                                |
| purple | BP | GO:0090303 | positive regulation of wound healing        | 17735 | 11   | 134 | 2  | 0.08  | 0.00304 | 25       | ADRA2A;MYLK                                                                                |
| purple | BP | GO:2000060 | positive regulation of protein ubiquitin... | 17735 | 11   | 134 | 2  | 0.08  | 0.00304 | 25       | CLU;EGF                                                                                    |
| purple | MF | GO:0048407 | platelet-derived growth factor binding      | 17735 | 11   | 134 | 2  | 0.08  | 0.00307 | 25       | PDGFA;PDGFRA                                                                               |
| purple | BP | GO:0003018 | vascular process in circulatory system      | 17735 | 129  | 134 | 5  | 0.98  | 0.00308 | 5.102041 | ADRA2A;ALOX12;AVPR1A;GUCY1A3;SLC6A4                                                        |
| purple | BP | GO:0090257 | regulation of muscle system process         | 17735 | 129  | 134 | 5  | 0.98  | 0.00308 | 5.102041 | ADRA2A;GUCY1A3;MYL9;PDE5A;TPM1                                                             |
| purple | CC | GO:0019898 | extrinsic to membrane                       | 17735 | 127  | 134 | 5  | 0.99  | 0.00322 | 5.050505 | CAV2;GNAZ;GNG11;RGS6;SYTL4                                                                 |
| purple | BP | GO:0051492 | regulation of stress fiber assembly         | 17735 | 39   | 134 | 3  | 0.3   | 0.00324 | 10       | ARHGAP6;SDC4;TPM1                                                                          |
| purple | BP | GO:0010517 | regulation of phospholipase activity        | 17735 | 80   | 134 | 4  | 0.61  | 0.00326 | 6.557377 | ARHGAP6;AVPR1A;PDGFRA;PRKAR2B                                                              |
| purple | BP | GO:0051017 | actin filament bundle assembly              | 17735 | 80   | 134 | 4  | 0.61  | 0.00326 | 6.557377 | ARHGAP6;SDC4;TPM1;VIL1                                                                     |
| purple | BP | GO:0072330 | monocarboxylic acid biosynthetic process    | 17735 | 190  | 134 | 6  | 1.45  | 0.00335 | 4.137931 | ALOX12;AVPR1A;ELOVL7;MGLL;PTGES;PTGS1                                                      |
| purple | BP | GO:0060193 | positive regulation of lipase activity      | 17735 | 81   | 134 | 4  | 0.62  | 0.00341 | 6.451613 | ARHGAP6;AVPR1A;PDGFRA;PRKAR2B                                                              |
| purple | MF | GO:0097367 | carbohydrate derivative binding             | 17735 | 190  | 134 | 6  | 1.46  | 0.00345 | 4.109589 | C6orf25;FSTL1;PCKSK6;PF4;PF4V1;SELP                                                        |
| purple | BP | GO:0031645 | negative regulation of neurological syst... | 17735 | 40   | 134 | 3  | 0.31  | 0.00348 | 9.677419 | AVPR1A;MGLL;SLC6A4                                                                         |
| purple | MF | GO:0030295 | protein kinase activator activity           | 17735 | 40   | 134 | 3  | 0.31  | 0.00354 | 9.677419 | CDKN1A;EGF;TOM1L1                                                                          |
| purple | BP | GO:0021534 | cell proliferation in hindbrain             | 17735 | 12   | 134 | 2  | 0.09  | 0.00363 | 22.22222 | EGF;SLC6A4                                                                                 |
| purple | BP | GO:0001676 | long-chain fatty acid metabolic process     | 17735 | 41   | 134 | 3  | 0.31  | 0.00374 | 9.677419 | ACSBG1;MGLL;PTGS1                                                                          |
| purple | BP | GO:0051049 | regulation of transport                     | 17735 | 1000 | 134 | 16 | 7.63  | 0.00375 | 2.096986 | ADRA2A;AVPR1A;BMP6;CDKN1A;EGF;F2RL3;ITGB3;MAOB;MAP1B;MYLK;PRKAR2B;SERPINE1;STON2;SYTL4;1   |
| purple | BP | GO:0048468 | cell development                            | 17735 | 1482 | 134 | 21 | 11.31 | 0.0038  | 1.856764 | ABLIM3;BMP6;CAV2;CD9;ITGA2B;ITGB3;MAP1B;MEIS1;MYL9;PARD3;PDE5A;PDGFRA;PGRMC1;PLXNB3;RGS    |
| purple | BP | GO:0044767 | single-organism developmental process       | 17735 | 3427 | 134 | 39 | 26.16 | 0.00383 | 1.490826 | ABLIM3;ACSBG1;ALOX12;AVPR1A;BMP6;CA2;CAV2;CD9;CDKN1A;EGF;ITGA2B;ITGB3;MAP1B;MEIS1;MYL9;1V  |
| purple | CC | GO:0019897 | extrinsic to plasma membrane                | 17735 | 82   | 134 | 4  | 0.64  | 0.0039  | 6.25     | CAV2;GNAZ;GNG11;RGS6                                                                       |
| purple | CC | GO:0001725 | stress fiber                                | 17735 | 41   | 134 | 3  | 0.32  | 0.00401 | 9.375    | MYL9;MYLK;TPM1                                                                             |
| purple | BP | GO:0050714 | positive regulation of protein secretion    | 17735 | 85   | 134 | 4  | 0.65  | 0.00405 | 6.153846 | BMP6;SYTL4;TNFSF4;VEGFC                                                                    |
| purple | BP | GO:0048856 | anatomical structure development            | 17735 | 3903 | 134 | 43 | 29.79 | 0.00405 | 1.443437 | ABLIM3;ACSBG1;ALOX12;AVPR1A;BMP6;CA2;CAV2;CD9;CDKN1A;CLDN5;DNM3;EGF;ITGA2B;ITGB3;MAP1B;1B  |
| purple | BP | GO:0071560 | cellular response to transforming growth... | 17735 | 198  | 134 | 6  | 1.51  | 0.0041  | 3.97351  | CAV2;LTBP1;PARD3;PDGFA;SERPINE1;TGFB11                                                     |
| purple | BP | GO:0071559 | response to transforming growth factor b... | 17735 | 199  | 134 | 6  | 1.52  | 0.0042  | 3.947368 | CAV2;LTBP1;PARD3;PDGFA;SERPINE1;TGFB11                                                     |
| purple | BP | GO:0007320 | insemination                                | 17735 | 13   | 134 | 2  | 0.1   | 0.00426 | 20       | AVPR1A;SLC6A4                                                                              |
| purple | BP | GO:0019369 | arachidonic acid metabolic process          | 17735 | 13   | 134 | 2  | 0.1   | 0.00426 | 20       | MGLL;PTGS1                                                                                 |
| purple | BP | GO:0031954 | positive regulation of protein autophosp... | 17735 | 13   | 134 | 2  | 0.1   | 0.00426 | 20       | PDGFA;VEGFC                                                                                |
| purple | BP | GO:0045986 | negative regulation of smooth muscle con... | 17735 | 13   | 134 | 2  | 0.1   | 0.00426 | 20       | ADRA2A;GUCY1A3                                                                             |
| purple | BP | GO:0060055 | angiogenesis involved in wound healing      | 17735 | 13   | 134 | 2  | 0.1   | 0.00426 | 20       | ITGB3;SERPINE1                                                                             |
| purple | BP | GO:0010595 | positive regulation of endothelial cell ... | 17735 | 43   | 134 | 3  | 0.33  | 0.00428 | 9.090909 | ALOX12;ITGB3;VEGFC                                                                         |
| purple | BP | GO:0065003 | macromolecular complex assembly             | 17735 | 1014 | 134 | 16 | 7.74  | 0.00429 | 2.067183 | ARHGAP6;CAV2;CLU;EGF;HIST1H2AG;HIST1H2BH;HIST1H2BJ;KND3;PARD3;SELP;SLC6A4;TUBA8;TUBB1;VIL  |
| purple | BP | GO:0007166 | cell surface receptor signaling pathway     | 17735 | 2331 | 134 | 29 | 17.79 | 0.00429 | 1.630129 | ADRA2A;AVPR1A;BMP6;CAV2;CLEC1B;EGF;F2RL3;FSTL1;GNAZ;GNG11;GP6;GRK5;HOMER2;ITGA2B;ITGB3;IT  |
| purple | BP | GO:0032496 | response to lipopolysaccharide              | 17735 | 200  | 134 | 6  | 1.53  | 0.0043  | 3.921569 | MAOB;PTGES;SELP;SERPINE1;SPARC;TNFSF4                                                      |
| purple | BP | GO:0008217 | regulation of blood pressure                | 17735 | 140  | 134 | 5  | 1.07  | 0.00437 | 4.672897 | AVPR1A;GUCY1A3;PTGS1;TPM1;VEGFC                                                            |
| purple | BP | GO:0045597 | positive regulation of cell differentiat... | 17735 | 492  | 134 | 10 | 3.76  | 0.00437 | 2.659574 | ALOX12;BMP6;CA2;MAP1B;PDE5A;PF4;RGS6;TGFB11;TNFSF4;VEGFC                                   |
| purple | BP | GO:0051050 | positive regulation of transport            | 17735 | 492  | 134 | 10 | 3.76  | 0.00437 | 2.659574 | ADRA2A;AVPR1A;BMP6;EGF;F2RL3;MYLK;SERPINE1;SYTL4;TNFSF4;VEGFC                              |
| purple | BP | GO:0003008 | system process                              | 17735 | 1703 | 134 | 23 | 13    | 0.00439 | 1.769231 | ACSBG1;ADRA2A;ALOX12;AVPR1A;CALD1;CAV2;CD9;CLDN5;GUCY1A3;GUCY1B3;ITGB5;KND3;MGLL;MYL9;1B   |
| purple | CC | GO:0005912 | adherens junction                           | 17735 | 196  | 134 | 6  | 1.53  | 0.00443 | 3.921569 | ESAM;ITGA2B;ITGB5;PARD3;SDC4;TGFB11                                                        |
| purple | BP | GO:0014068 | positive regulation of phosphatidylinosi... | 17735 | 44   | 134 | 3  | 0.34  | 0.00457 | 8.823529 | PDGFA;PDGFRA;SELP                                                                          |
| purple | BP | GO:0051707 | response to other organism                  | 17735 | 578  | 134 | 11 | 4.41  | 0.00463 | 2.494331 | CLU;GUCY1A3;HIST1H2BJ;MAOB;PPBP;PTGES;SELP;SERPINE1;SPARC;TNFSF4;VIL1                      |
| purple | BP | GO:0055082 | cellular chemical homeostasis               | 17735 | 665  | 134 | 12 | 5.08  | 0.00477 | 2.362205 | ACSBG1;ADRA2A;ALOX12;AVPR1A;CA2;CD9;CLDN5;F2RL3;PDGFRA;SH3TC2;SLC8A3;WASF3                 |
| purple | BP | GO:0007399 | nervous system development                  | 17735 | 1716 | 134 | 23 | 13.1  | 0.00482 | 1.755725 | ABLIM3;ACSBG1;AVPR1A;BMP6;CD9;CLDN5;DNM3;EGF;ITGA2B;ITGB3;MAP1B;MEIS1;MYL9;NRGN;PARD3;P    |
| purple | BP | GO:0048010 | vascular endothelial growth factor recep... | 17735 | 45   | 134 | 3  | 0.34  | 0.00487 | 8.823529 | ITGB3;PDGFRA;VEGFC                                                                         |
| purple | BP | GO:0007275 | multicellular organismal development        | 17735 | 3940 | 134 | 43 | 30.08 | 0.00487 | 1.429521 | ABLIM3;ACSBG1;ALOX12;AVPR1A;BMP6;CA2;CAV2;CD9;CDKN1A;CLDN5;DNM3;EGF;GFI1B;ITGA2B;ITGB3;IT  |
| purple | BP | GO:0090075 | relaxation of muscle                        | 17735 | 14   | 134 | 2  | 0.11  | 0.00495 | 18.18182 | GUCY1A3;PDE5A                                                                              |
| purple | BP | GO:2000058 | regulation of protein ubiquitination inv... | 17735 | 14   | 134 | 2  | 0.11  | 0.00495 | 18.18182 | CLU;EGF                                                                                    |
| purple | BP | GO:0032844 | regulation of homeostatic process           | 17735 | 275  | 134 | 7  | 2.1   | 0.00512 | 3.333333 | ADRA2A;ALOX12;AVPR1A;CA2;F2RL3;ITGB3;WASF3                                                 |
| purple | BP | GO:0048522 | positive regulation of cellular process     | 17735 | 3140 | 134 | 36 | 23.97 | 0.00517 | 1.501877 | ABLIM3;ADRA2A;ALOX12;AVPR1A;BMP6;CA2;CAV2;CDKN1A;CLU;CXCL5;EGF;F2RL3;GUCY1A3;ITGB3;MAOB;1B |
| purple | BP | GO:0090287 | regulation of cellular response to growt... | 17735 | 146  | 134 | 5  | 1.11  | 0.00521 | 4.504505 | CAV2;ITGB3;LTBP1;TGFB11;VEGFC                                                              |
| purple | BP | GO:2000021 | regulation of ion homeostasis               | 17735 | 147  | 134 | 5  | 1.12  | 0.00536 | 4.464286 | ALOX12;AVPR1A;CA2;F2RL3;WASF3                                                              |
| purple | BP | GO:0032526 | response to retinoic acid                   | 17735 | 92   | 134 | 4  | 0.7   | 0.00537 | 5.714286 | BMP6;PDGFA;PTGES;SLC6A4                                                                    |
| purple | CC | GO:0042995 | cell projection                             | 17735 | 1194 | 134 | 18 | 9.34  | 0.00541 | 1.927195 | CA2;CLDN5;CTTN;DNM3;ENKUR;HOMER2;KND3;MAP1B;MYLK;PARD3;PDGFA;PTGS1;PVALB;SLC6A4;SLC8A      |
| purple | BP | GO:0048519 | negative regulation of biological proces... | 17735 | 3150 | 134 | 36 | 24.05 | 0.00545 | 1.496881 | ADRA2A;ALOX12;ARHGAP6;AVPR1A;CAV2;CD9;CDKN1A;CLU;EGF;F2RL3;GFI1B;GRK5;GUCY1A3;ITGB3;LTBP1  |
| purple | BP | GO:0043149 | stress fiber assembly                       | 17735 | 47   | 134 | 3  | 0.36  | 0.0055  | 8.333333 | ARHGAP6;SDC4;TPM1                                                                          |
| purple | BP | GO:0002237 | response to molecule of bacterial origin    | 17735 | 211  | 134 | 6  | 1.61  | 0.00557 | 3.726708 | MAOB;PTGES;SELP;SERPINE1;SPARC;TNFSF4                                                      |
| purple | MF | GO:0019209 | kinase activator activity                   | 17735 | 47   | 134 | 3  | 0.36  | 0.00559 | 8.333333 | CDKN1A;EGF;TOM1L1                                                                          |
| purple | BP | GO:0071310 | cellular response to organic substance      | 17735 | 1333 | 134 | 19 | 10.18 | 0.00561 | 1.866405 | ADRA2A;ALOX12;CAV2;GNG11;ITGB3;LTBP1;PARD3;PDGFA;PDGFRA;PF4;PRKAR2B;SERPINE1;SLC6A4;SLC8A  |
| purple | BP | GO:0048731 | system development                          | 17735 | 3385 | 134 | 38 | 25.84 | 0.00562 | 1.470588 | ABLIM3;ACSBG1;AVPR1A;BMP6;CA2;CAV2;CD9;CDKN1A;CLDN5;DNM3;EGF;ITGA2B;ITGB3;MAP1B;MEIS1;M    |
| purple | BP | GO:0032787 | monocarboxylic acid metabolic process       | 17735 | 430  | 134 | 9  | 3.28  | 0.00563 | 2.743902 | ABCC3;ACSBG1;ALOX12;AVPR1A;ELOVL7;MGLL;PRKAR2B;PTGES;PTGS1                                 |
| purple | MF | GO:0003779 | actin binding                               | 17735 | 351  | 134 | 8  | 2.69  | 0.00565 | 2.973978 | ABLIM3;CALD1;HOMER2;MYLK;SLC6A4;TPM1;VIL1;WASF3                                            |
| purple | BP | GO:0001508 | regulation of action potential              | 17735 | 149  | 134 | 5  | 1.14  | 0.00567 | 4.385965 | ACSBG1;CD9;CLDN5;SH3TC2;WASF3                                                              |
| purple | BP | GO:0009653 | anatomical structure morphogenesis          | 17735 | 2058 | 134 | 26 | 15.71 | 0.00583 | 1.654997 | ABLIM3;BMP6;CA2;CD9;CDKN1A;EGF;ITGA2B;ITGB3;MAP1B;MEIS1;MYL9;MYLK;NAT8B;PARD3;PDGFA;PDGI   |
| purple | BP | GO:0051128 | regulation of cellular component organiz... | 17735 | 1240 | 134 | 18 | 9.47  | 0.00586 | 1.900739 | ALOX12;ARHGAP6;AVPR1A;CAV2;CDKN1A;CLU;EGF;MAP1B;PDGFA;PDGFRA;SDC4;SELP;SERPINE1;STON2;TC   |
| purple | BP | GO:0051051 | negative regulation of transport            | 17735 | 284  | 134 | 7  | 2.17  | 0.00608 | 3.225806 | ADRA2A;EGF;ITGB3;MAOB;MAP1B;SYTL4;TNFSF4                                                   |

|        |    |             |                                             |       |       |     |     |       |         |          |                                                                                           |
|--------|----|-------------|---------------------------------------------|-------|-------|-----|-----|-------|---------|----------|-------------------------------------------------------------------------------------------|
| purple | BP | GO:0007186  | G-protein coupled receptor signaling pat... | 17735 | 601   | 134 | 11  | 4.59  | 0.00617 | 2.396514 | ADRA2A;AVPR1A;CAV2;F2RL3;GNAZ;GNG11;GRK5;HOMER2;MGLL;PARD3;RGS6                           |
| purple | BP | GO:2000177  | regulation of neural precursor cell prol... | 17735 | 49    | 134 | 3   | 0.37  | 0.00618 | 8.108108 | EGF;SLC6A4;VEGFC                                                                          |
| purple | BP | GO:0048514  | blood vessel morphogenesis                  | 17735 | 438   | 134 | 9   | 3.34  | 0.00633 | 2.694611 | EGF;ITGB3;MEIS1;MYLK;PDGFA;PDGFRA;PF4;SERPINE1;VEGFC                                      |
| purple | BP | GO:00097305 | response to alcohol                         | 17735 | 217   | 134 | 6   | 1.66  | 0.00637 | 3.614458 | AVPR1A;CDKN1A;MAOB;PDGFA;SLC6A4;SPARC                                                     |
| purple | BP | GO:0006873  | cellular ion homeostasis                    | 17735 | 604   | 134 | 11  | 4.61  | 0.0064  | 2.386117 | ACSBG1;ALOX12;AVPR1A;CA2;CD9;CLDN5;F2RL3;PDGFRA;SH3TC2;SLC8A3;WASF3                       |
| purple | CC | GO:0005737  | cytoplasm                                   | 17735 | 9016  | 134 | 85  | 70.5  | 0.00652 | 1.205674 | ABLM13;ACRBP;ACSBG1;ADRA2A;ALOX12;ARHGAP6;ASAP2;AVPR1A;BET3L;BMP6;C6orf25;C8orf42;CA2;CAB |
| purple | CC | GO:0070161  | anchoring junction                          | 17735 | 214   | 134 | 6   | 1.67  | 0.00675 | 3.592814 | ESAM;ITGA2B;ITGB5;PARD3;SDC4;TGFB11                                                       |
| purple | MF | GO:0005525  | GTP binding                                 | 17735 | 366   | 134 | 8   | 2.81  | 0.00721 | 2.846975 | DNM3;GNAZ;GUCY1A3;GUCY1B3;RAB6B;RHOBTB1;TUBA8;TUBB1                                       |
| purple | CC | GO:0042641  | actomyosin                                  | 17735 | 51    | 134 | 3   | 0.4   | 0.0074  | 7.5      | MYL9;MYLK;TPM1                                                                            |
| purple | MF | GO:0005516  | calmodulin binding                          | 17735 | 162   | 134 | 5   | 1.24  | 0.00822 | 4.032258 | CALD1;ENKUR;MYLK;NRGN;SLC8A3                                                              |
| purple | CC | GO:0009898  | internal side of plasma membrane            | 17735 | 102   | 134 | 4   | 0.8   | 0.00841 | 5        | CAV2;GNAZ;GNG11;RGS6                                                                      |
| purple | MF | GO:0008083  | growth factor activity                      | 17735 | 164   | 134 | 5   | 1.26  | 0.00864 | 3.968254 | BMP6;EGF;PDGFA;PPBP;VEGFC                                                                 |
| purple | MF | GO:0019838  | growth factor binding                       | 17735 | 105   | 134 | 4   | 0.81  | 0.00869 | 4.938272 | LTBP1;PCSK6;PDGFA;PDGFRA                                                                  |
| purple | MF | GO:0003924  | GTPase activity                             | 17735 | 232   | 134 | 6   | 1.78  | 0.00897 | 3.70787  | DNM3;GNAZ;GNG11;RAB6B;TUBA8;TUBB1                                                         |
| purple | MF | GO:0042803  | protein homodimerization activity           | 17735 | 545   | 134 | 10  | 4.18  | 0.00916 | 2.392344 | ADRA2A;CAV2;HOMER2;MAOB;MGLL;PDGFA;PDGFRA;SLC6A4;VIL1;VWF                                 |
| purple | MF | GO:0015491  | cation:cation antiporter activity           | 17735 | 19    | 134 | 2   | 0.15  | 0.00917 | 13.33333 | SLC24A3;SLC8A3                                                                            |
| purple | MF | GO:0008289  | lipid binding                               | 17735 | 721   | 134 | 12  | 5.53  | 0.00932 | 2.169982 | ASAP2;DNM3;GRB14;GRK5;MGLL;PARD3;PGRMC1;SDPR;SELP;SYTL4;VEPH1;VIL1                        |
| purple | MF | GO:0005488  | binding                                     | 17735 | 11799 | 134 | 101 | 90.55 | 0.00947 | 1.115406 | ABCC3;ABLM13;ACSBG1;ADRA2A;ALOX12;ARHGAP6;ASAP2;AVPR1A;BMP6;C6orf25;CA2;CABP5;CALD1;CAV1  |
| purple | CC | GO:0012505  | endomembrane system                         | 17735 | 1768  | 134 | 23  | 13.82 | 0.00992 | 1.664255 | ASAP2;CAV2;CD9;ELOVL7;GNAZ;GRB14;HRASL5;ITGA2B;ITGB3;MGLL;PARD3;PCSK6;PYC11B;PDGFA;PGRMC1 |
| purple | CC | GO:0005783  | endoplasmic reticulum                       | 17735 | 1273  | 134 | 18  | 9.95  | 0.01023 | 1.809045 | ACSBG1;BET3L;C6orf25;CAV2;CDC3;CLU;ELOVL7;GNAZ;MGLL;PCSK6;PYC11B;PDGFA;PGRMC1;PLOD2;PROS  |
| purple | MF | GO:0009975  | cyclase activity                            | 17735 | 21    | 134 | 2   | 0.16  | 0.01115 | 12.5     | GUCY1A3;GUCY1B3                                                                           |
| purple | MF | GO:0016849  | phosphorus-oxygen lyase activity            | 17735 | 21    | 134 | 2   | 0.16  | 0.01115 | 12.5     | GUCY1A3;GUCY1B3                                                                           |
| purple | MF | GO:0019887  | protein kinase regulator activity           | 17735 | 113   | 134 | 4   | 0.87  | 0.01117 | 4.597701 | CDKN1A;EGF;PRKAR2B;TOM1L1                                                                 |
| purple | MF | GO:0031406  | carboxylic acid binding                     | 17735 | 177   | 134 | 5   | 1.36  | 0.01175 | 3.676471 | PLOD2;PTGES;SDPR;SELP;VIL1                                                                |
| purple | MF | GO:0017124  | SH3 domain binding                          | 17735 | 115   | 134 | 4   | 0.88  | 0.01186 | 4.545455 | ARHGAP6;ENKUR;SH3BGR2;TOM1L1                                                              |
| purple | MF | GO:0005543  | phospholipid binding                        | 17735 | 487   | 134 | 9   | 3.74  | 0.01266 | 2.406417 | ASAP2;DNM3;GRB14;GRK5;PARD3;SDPR;SYTL4;VEPH1;VIL1                                         |
| purple | CC | GO:0045121  | membrane raft                               | 17735 | 178   | 134 | 5   | 1.39  | 0.01301 | 3.597122 | CAV2;PRKAR2B;SDC4;SDPR;SLC6A4                                                             |
| purple | MF | GO:0015298  | solute:cation antiporter activity           | 17735 | 23    | 134 | 2   | 0.18  | 0.0133  | 11.11111 | SLC24A3;SLC8A3                                                                            |
| purple | MF | GO:0043499  | eukaryotic cell surface binding             | 17735 | 23    | 134 | 2   | 0.18  | 0.0133  | 11.11111 | PCSK6;PDGFA                                                                               |
| purple | MF | GO:0042802  | identical protein binding                   | 17735 | 852   | 134 | 13  | 6.54  | 0.0136  | 1.987768 | ADRA2A;CAV2;CLDN5;HOMER2;ITGA2B;ITGB3;MAOB;MGLL;PDGFA;PDGFRA;SLC6A4;VIL1;VWF              |
| purple | CC | GO:0005902  | microvillus                                 | 17735 | 66    | 134 | 3   | 0.52  | 0.01495 | 5.769231 | CA2;PDGFA;VIL1                                                                            |
| purple | CC | GO:0030027  | lamellipodium                               | 17735 | 122   | 134 | 4   | 0.95  | 0.01544 | 4.210526 | CTTN;MYLK;VIL1;WASF3                                                                      |
| purple | CC | GO:0000786  | nucleosome                                  | 17735 | 67    | 134 | 3   | 0.52  | 0.01556 | 5.769231 | HIST1H2AG;HIST1H2BH;HIST1H2BJ                                                             |
| purple | CC | GO:0031252  | cell leading edge                           | 17735 | 260   | 134 | 6   | 2.03  | 0.01649 | 2.955665 | CTTN;ITGB5;MYLK;TPM1;VIL1;WASF3                                                           |
| purple | MF | GO:0005546  | phosphatidylinositol-4,5-bisphosphate bi... | 17735 | 26    | 134 | 2   | 0.2   | 0.01683 | 10       | PARD3;VIL1                                                                                |
| purple | CC | GO:0005925  | focal adhesion                              | 17735 | 127   | 134 | 4   | 0.99  | 0.01764 | 4.040404 | ITGA2B;ITGB5;SDC4;TGFB11                                                                  |
| purple | MF | GO:0043168  | anion binding                               | 17735 | 2346  | 134 | 27  | 18    | 0.01797 | 1.5      | ABCC3;ACSBG1;C6orf25;DNM3;FSTL1;GNAZ;GRK5;GUCY1A3;GUCY1B3;MAOB;MYLK;PARD3;PCSK6;PDE5A;P   |
| purple | MF | GO:0020037  | heme binding                                | 17735 | 131   | 134 | 4   | 1.01  | 0.01832 | 3.960396 | GUCY1A3;GUCY1B3;PGRMC1;PTGS1                                                              |
| purple | MF | GO:0019207  | kinase regulator activity                   | 17735 | 133   | 134 | 4   | 1.02  | 0.01925 | 3.921569 | CDKN1A;EGF;PRKAR2B;TOM1L1                                                                 |
| purple | CC | GO:0005924  | cell-substrate adherens junction            | 17735 | 132   | 134 | 4   | 1.03  | 0.02002 | 3.883495 | ITGA2B;ITGB5;SDC4;TGFB11                                                                  |
| purple | MF | GO:0017022  | myosin binding                              | 17735 | 29    | 134 | 2   | 0.22  | 0.02071 | 9.090909 | CALD1;SLC6A4                                                                              |
| purple | CC | GO:0009897  | external side of plasma membrane            | 17735 | 202   | 134 | 5   | 1.58  | 0.02129 | 3.164557 | CD9;ITGA2B;PDGFRA;SELP;VWF                                                                |
| purple | MF | GO:0030551  | cyclic nucleotide binding                   | 17735 | 30    | 134 | 2   | 0.23  | 0.02208 | 8.695652 | PDE5A;PRKAR2B                                                                             |
| purple | CC | GO:0005796  | Golgi lumen                                 | 17735 | 77    | 134 | 3   | 0.6   | 0.02246 | 5        | PCSK6;PROS1;SDC4                                                                          |
| purple | CC | GO:0043197  | dendritic spine                             | 17735 | 137   | 134 | 4   | 1.07  | 0.02259 | 3.738318 | DNM3;HOMER2;MAP1B;SLC8A3                                                                  |
| purple | CC | GO:0044309  | neuron spine                                | 17735 | 137   | 134 | 4   | 1.07  | 0.02259 | 3.738318 | DNM3;HOMER2;MAP1B;SLC8A3                                                                  |
| purple | MF | GO:0046906  | tetrapyrrole binding                        | 17735 | 140   | 134 | 4   | 1.07  | 0.02275 | 3.738318 | GUCY1A3;GUCY1B3;PGRMC1;PTGS1                                                              |
| purple | CC | GO:0030055  | cell-substrate junction                     | 17735 | 138   | 134 | 4   | 1.08  | 0.02313 | 3.703704 | ITGA2B;ITGB5;SDC4;TGFB11                                                                  |
| purple | MF | GO:0016702  | oxidoreductase activity, acting on singl... | 17735 | 80    | 134 | 3   | 0.61  | 0.0236  | 4.918033 | ALOX12;PLOD2;PTGS1                                                                        |
| purple | MF | GO:0005178  | integrin binding                            | 17735 | 81    | 134 | 3   | 0.62  | 0.02438 | 4.83871  | CD9;ITGB5;VWF                                                                             |
| purple | MF | GO:0016701  | oxidoreductase activity, acting on singl... | 17735 | 81    | 134 | 3   | 0.62  | 0.02438 | 4.83871  | ALOX12;PLOD2;PTGS1                                                                        |
| purple | MF | GO:0051213  | dioxygenase activity                        | 17735 | 82    | 134 | 3   | 0.63  | 0.02516 | 4.761905 | ALOX12;PLOD2;PTGS1                                                                        |
| purple | CC | GO:0043005  | neuron projection                           | 17735 | 627   | 134 | 10  | 4.9   | 0.02536 | 2.040816 | CA2;CLDN5;DNM3;HOMER2;KCND3;MAP1B;PARD3;PVALB;SLC6A4;SLC8A3                               |
| purple | CC | GO:0042383  | sarcolemma                                  | 17735 | 83    | 134 | 3   | 0.65  | 0.02728 | 4.615385 | ALOX12;KCND3;SLC8A3                                                                       |
| purple | MF | GO:0019905  | syntaxin binding                            | 17735 | 35    | 134 | 2   | 0.27  | 0.02947 | 7.407407 | CAV2;SLC6A4                                                                               |
| purple | MF | GO:0005509  | calcium ion binding                         | 17735 | 657   | 134 | 10  | 5.04  | 0.0296  | 1.984127 | CABP5;EGF;FSTL1;FSTL4;LTBP1;MYL9;PROS1;PVALB;SPARC;VIL1                                   |
| purple | MF | GO:0005084  | extracellular matrix binding                | 17735 | 36    | 134 | 2   | 0.28  | 0.03105 | 7.142857 | ITGA2B;SPARC                                                                              |
| purple | MF | GO:0004866  | endopeptidase inhibitor activity            | 17735 | 162   | 134 | 4   | 1.24  | 0.03615 | 3.225806 | PROS1;SERPINE1;TFPI;VIL1                                                                  |
| purple | MF | GO:0061135  | endopeptidase regulator activity            | 17735 | 166   | 134 | 4   | 1.27  | 0.03899 | 3.149606 | PROS1;SERPINE1;TFPI;VIL1                                                                  |
| purple | MF | GO:0032403  | protein complex binding                     | 17735 | 327   | 134 | 6   | 2.51  | 0.0402  | 2.390438 | ADRA2A;CD9;CDKN1A;GNAZ;ITGB5;VWF                                                          |
| purple | CC | GO:0030016  | myofibril                                   | 17735 | 165   | 134 | 4   | 1.29  | 0.04064 | 3.100775 | CALD1;MYL9;SDC4;TPM1                                                                      |
| purple | MF | GO:0030414  | peptidase inhibitor activity                | 17735 | 169   | 134 | 4   | 1.3   | 0.0412  | 3.076923 | PROS1;SERPINE1;TFPI;VIL1                                                                  |
| purple | CC | GO:0043235  | receptor complex                            | 17735 | 167   | 134 | 4   | 1.31  | 0.04216 | 3.053435 | ADRA2A;ITGA2B;ITGB3;ITGB5                                                                 |
| purple | CC | GO:0005923  | tight junction                              | 17735 | 101   | 134 | 3   | 0.79  | 0.04477 | 3.797468 | CLDN5;ESAM;PARD3                                                                          |
| purple | CC | GO:0070160  | occluding junction                          | 17735 | 101   | 134 | 3   | 0.79  | 0.04477 | 3.797468 | CLDN5;ESAM;PARD3                                                                          |
| purple | MF | GO:0016860  | intramolecular oxidoreductase activity      | 17735 | 44    | 134 | 2   | 0.34  | 0.04481 | 5.882353 | ITGB3;PTGES                                                                               |
| purple | MF | GO:0072341  | modified amino acid binding                 | 17735 | 44    | 134 | 2   | 0.34  | 0.04481 | 5.882353 | PTGES;SDPR                                                                                |
| purple | CC | GO:0031012  | extracellular matrix                        | 17735 | 422   | 134 | 7   | 3.3   | 0.048   | 2.121212 | CLU;LTBP1;PCSK6;SERPINE1;SPARC;TGFB11;VWF                                                 |
| purple | MF | GO:0000149  | SNARE binding                               | 17735 | 46    | 134 | 2   | 0.35  | 0.04855 | 5.714286 | CAV2;SLC6A4                                                                               |

|        |    |            |                                             |       |      |     |    |       |          |          |                                                                                              |
|--------|----|------------|---------------------------------------------|-------|------|-----|----|-------|----------|----------|----------------------------------------------------------------------------------------------|
| purple | MF | GO:0008307 | structural constituent of muscle            | 17735 | 46   | 134 | 2  | 0.35  | 0.04855  | 5.714286 | MYL9;TPM1                                                                                    |
| purple | MF | GO:0017137 | Rab GTPase binding                          | 17735 | 46   | 134 | 2  | 0.35  | 0.04855  | 5.714286 | SLC6A4;SYTL4                                                                                 |
| purple | CC | GO:0043292 | contractile fiber                           | 17735 | 175  | 134 | 4  | 1.37  | 0.0486   | 2.919708 | CALD1;MYL9;SDC4;TPM1                                                                         |
| pink   | CC | GO:0005833 | hemoglobin complex                          | 17735 | 12   | 196 | 9  | 0.14  | 5.50E-16 | 64.28571 | AHSP;HBA2;HBB;HBD;HBG1;HBG2;HBM;HBQ1;HBZ                                                     |
| pink   | MF | GO:0005344 | oxygen transporter activity                 | 17735 | 13   | 196 | 8  | 0.15  | 2.80E-13 | 53.33333 | HBA2;HBB;HBD;HBG1;HBG2;HBM;HBQ1;HBZ                                                          |
| pink   | BP | GO:0048821 | erythrocyte development                     | 17735 | 21   | 196 | 7  | 0.24  | 2.10E-09 | 29.16667 | ANK1;EPB42;GATA1;HBZ;KLF1;SOX6;TAL1                                                          |
| pink   | BP | GO:0030218 | erythrocyte differentiation                 | 17735 | 88   | 196 | 11 | 0.99  | 4.10E-09 | 11.11111 | ALAS2;ANK1;DYRK3;EPB42;FECH;GATA1;HBZ;KLF1;SOX6;TAL1;TRIM10                                  |
| pink   | MF | GO:0019825 | oxygen binding                              | 17735 | 36   | 196 | 8  | 0.41  | 5.30E-09 | 19.5122  | HBA2;HBB;HBD;HBG1;HBG2;HBM;HBQ1;HBZ                                                          |
| pink   | BP | GO:0034101 | erythrocyte homeostasis                     | 17735 | 95   | 196 | 11 | 1.07  | 9.30E-09 | 10.28037 | ALAS2;ANK1;DYRK3;EPB42;FECH;GATA1;HBZ;KLF1;SOX6;TAL1;TRIM10                                  |
| pink   | BP | GO:0048872 | homeostasis of number of cells              | 17735 | 176  | 196 | 13 | 1.99  | 9.60E-08 | 6.532663 | ALAS2;ANK1;DYRK3;EPB42;FECH;GATA1;HBZ;KLF1;PRDX5;SOX6;SPTA1;TAL1;TRIM10                      |
| pink   | BP | GO:0065008 | regulation of biological quality            | 17735 | 2547 | 196 | 56 | 28.73 | 1.90E-07 | 1.949182 | ABCC4;ABCG2;ACHE;AHSP;ALAS2;ANK1;AQP1;BAMBI;BCL2L1;BEST2;CSDA;DPM2;DYRK3;EHD2;EPB42;EPB44    |
| pink   | BP | GO:0015669 | gas transport                               | 17735 | 13   | 196 | 5  | 0.15  | 2.10E-07 | 33.33333 | AQP1;HBA2;HBB;HBQ1;RHAG                                                                      |
| pink   | BP | GO:0006778 | porphyrin-containing compound metabolic ... | 17735 | 39   | 196 | 7  | 0.44  | 2.30E-07 | 15.90909 | ALAS2;ANK1;BLVRB;FECH;HMBS;SLC25A39;SPTA1                                                    |
| pink   | MF | GO:0005506 | iron ion binding                            | 17735 | 164  | 196 | 12 | 1.86  | 3.50E-07 | 6.451613 | Csorf4;FECH;FTL;HBA2;HBB;HBD;HBG1;HBG2;HBM;HBQ1;HBZ;SNCA                                     |
| pink   | BP | GO:0043154 | negative regulation of cysteine-type end... | 17735 | 63   | 196 | 8  | 0.71  | 5.00E-07 | 11.26761 | AQP1;GPX1;PRDX5;RAG1;SFRP2;SIAH2;SNCA;WNT9A                                                  |
| pink   | BP | GO:0006779 | porphyrin-containing compound biosynthet... | 17735 | 28   | 196 | 6  | 0.32  | 5.80E-07 | 18.75    | ALAS2;ANK1;FECH;HMBS;SLC25A39;SPTA1                                                          |
| pink   | BP | GO:0015701 | bicarbonate transport                       | 17735 | 29   | 196 | 6  | 0.33  | 7.20E-07 | 18.18182 | AQP1;CA1;HBA2;HBB;RHAG;SLC4A1                                                                |
| pink   | BP | GO:2000117 | negative regulation of cysteine-type end... | 17735 | 66   | 196 | 8  | 0.74  | 7.30E-07 | 10.81081 | AQP1;GPX1;PRDX5;RAG1;SFRP2;SIAH2;SNCA;WNT9A                                                  |
| pink   | BP | GO:0033013 | tetrapyrrole metabolic process              | 17735 | 48   | 196 | 7  | 0.54  | 1.00E-06 | 12.96296 | ALAS2;ANK1;BLVRB;FECH;HMBS;SLC25A39;SPTA1                                                    |
| pink   | BP | GO:0033014 | tetrapyrrole biosynthetic process           | 17735 | 31   | 196 | 6  | 0.35  | 1.10E-06 | 17.14286 | ALAS2;ANK1;FECH;HMBS;SLC25A39;SPTA1                                                          |
| pink   | CC | GO:0044445 | cytosolic part                              | 17735 | 181  | 196 | 12 | 2.05  | 1.10E-06 | 5.853659 | AHSP;HBA2;HBB;HBD;HBG1;HBG2;HBM;HBQ1;HBZ;PRDX5;RPL3L;UBA52                                   |
| pink   | CC | GO:0030863 | cortical cytoskeleton                       | 17735 | 55   | 196 | 7  | 0.62  | 2.80E-06 | 11.29032 | ANK1;EPB42;EPB49;GYPC;SLC4A1;SPTA1;TMOD1                                                     |
| pink   | BP | GO:0042744 | hydrogen peroxide catabolic process         | 17735 | 21   | 196 | 5  | 0.24  | 3.00E-06 | 20.83333 | GPX1;HBA2;HBB;PRDX5;PRDX6                                                                    |
| pink   | BP | GO:0030097 | hemopoiesis                                 | 17735 | 509  | 196 | 19 | 5.74  | 4.70E-06 | 3.10105  | AHSP;ALAS2;ANK1;DYRK3;EPB42;FECH;GATA1;GLRX5;HBZ;KLF1;LYL1;PBX1;RAG1;SFRP2;SOX6;SPTA1;TAL1;T |
| pink   | BP | GO:0043249 | erythrocyte maturation                      | 17735 | 11   | 196 | 4  | 0.12  | 4.80E-06 | 33.33333 | EPB42;HBZ;KLF1;TAL1                                                                          |
| pink   | BP | GO:0042592 | homeostatic process                         | 17735 | 1235 | 196 | 32 | 13.93 | 6.70E-06 | 2.2972   | ABCC2;ALAS2;ANK1;AQP1;BCL2L1;BEST2;DYRK3;EPB42;FECH;FKBP18;FTL;GATA1;GLRX5;GPX1;HBZ;KCNH2;I  |
| pink   | BP | GO:0002520 | immune system development                   | 17735 | 572  | 196 | 20 | 6.45  | 7.00E-06 | 3.100775 | AHSP;ALAS2;ANK1;DYRK3;EPB42;FECH;GATA1;GLRX5;HBZ;KLF1;LYL1;PBX1;POLL;RAG1;SFRP2;SOX6;SPTA1;T |
| pink   | BP | GO:0048534 | hematopoietic or lymphoid organ developm... | 17735 | 542  | 196 | 19 | 6.11  | 1.20E-05 | 3.109656 | AHSP;ALAS2;ANK1;DYRK3;EPB42;FECH;GATA1;GLRX5;HBZ;KLF1;LYL1;PBX1;RAG1;SFRP2;SOX6;SPTA1;TAL1;T |
| pink   | BP | GO:0020027 | hemoglobin metabolic process                | 17735 | 14   | 196 | 4  | 0.16  | 1.40E-05 | 25       | AHSP;EPB42;FECH                                                                              |
| pink   | MF | GO:0020037 | heme binding                                | 17735 | 131  | 196 | 9  | 1.48  | 1.80E-05 | 6.081081 | FECH;HBA2;HBB;HBD;HBG1;HBG2;HBM;HBQ1;HBZ                                                     |
| pink   | BP | GO:0042168 | heme metabolic process                      | 17735 | 30   | 196 | 5  | 0.34  | 1.90E-05 | 14.70588 | ALAS2;BLVRB;FECH;HMBS;SLC25A39                                                               |
| pink   | BP | GO:0030099 | myeloid cell differentiation                | 17735 | 247  | 196 | 12 | 2.79  | 2.40E-05 | 4.301075 | ALAS2;ANK1;DYRK3;EPB42;FECH;GATA1;HBZ;KLF1;SOX6;TAL1;TESC;TRIM1C                             |
| pink   | BP | GO:0070301 | cellular response to hydrogen peroxide      | 17735 | 52   | 196 | 6  | 0.59  | 2.50E-05 | 10.16949 | AQP1;GPX1;HBA2;HBB;PRDX5;PRDX6                                                               |
| pink   | MF | GO:0046906 | tetrapyrrole binding                        | 17735 | 140  | 196 | 9  | 1.58  | 3.00E-05 | 5.696203 | FECH;HBA2;HBB;HBD;HBG1;HBG2;HBM;HBQ1;HBZ                                                     |
| pink   | BP | GO:0042542 | response to hydrogen peroxide               | 17735 | 86   | 196 | 7  | 0.97  | 5.20E-05 | 7.216495 | AQP1;FKBP18;GPX1;HBA2;HBB;PRDX5;PRDX6                                                        |
| pink   | BP | GO:0042743 | hydrogen peroxide metabolic process         | 17735 | 37   | 196 | 5  | 0.42  | 5.60E-05 | 11.90476 | GPX1;HBA2;HBB;PRDX5;PRDX6                                                                    |
| pink   | CC | GO:0044448 | cell cortex part                            | 17735 | 90   | 196 | 7  | 1.02  | 7.30E-05 | 6.862745 | ANK1;EPB42;EPB49;GYPC;SLC4A1;SPTA1;TMOD1                                                     |
| pink   | MF | GO:0004601 | peroxidase activity                         | 17735 | 40   | 196 | 5  | 0.45  | 8.30E-05 | 11.11111 | GPX1;HBA2;HBB;PRDX5;PRDX6                                                                    |
| pink   | MF | GO:0016684 | oxidoreductase activity, acting on perox... | 17735 | 40   | 196 | 5  | 0.45  | 8.30E-05 | 11.11111 | GPX1;HBA2;HBB;PRDX5;PRDX6                                                                    |
| pink   | BP | GO:0006783 | heme biosynthetic process                   | 17735 | 22   | 196 | 4  | 0.25  | 9.70E-05 | 16       | ALAS2;FECH;HMBS;SLC25A39                                                                     |
| pink   | BP | GO:0010951 | negative regulation of endopeptidase act... | 17735 | 128  | 196 | 8  | 1.44  | 1.00E-04 | 5.555556 | AQP1;GPX1;PRDX5;RAG1;SFRP2;SIAH2;SNCA;WNT9A                                                  |
| pink   | BP | GO:0000302 | response to reactive oxygen species         | 17735 | 130  | 196 | 8  | 1.47  | 0.00011  | 5.442177 | AQP1;FKBP18;GPX1;HBA2;HBB;PRDX5;PRDX6;PTRN                                                   |
| pink   | BP | GO:0010466 | negative regulation of peptidase activit... | 17735 | 130  | 196 | 8  | 1.47  | 0.00011  | 5.442177 | AQP1;GPX1;PRDX5;RAG1;SFRP2;SIAH2;SNCA;WNT9A                                                  |
| pink   | MF | GO:0015101 | organic cation transmembrane transporter... | 17735 | 24   | 196 | 4  | 0.27  | 0.00014  | 14.81481 | RHAG;RHCE;SLC14A1;SLC6A8                                                                     |
| pink   | BP | GO:0043281 | regulation of cysteine-type endopeptidas... | 17735 | 172  | 196 | 9  | 1.94  | 0.00015  | 4.639175 | AQP1;GPX1;IFI27;PRDX5;RAG1;SFRP2;SIAH2;SNCA;WNT9A                                            |
| pink   | BP | GO:0035162 | embryonic hemopoiesis                       | 17735 | 25   | 196 | 4  | 0.28  | 0.00016  | 14.28571 | GATA1;KLF1;PBX1;TAL1                                                                         |
| pink   | BP | GO:2000116 | regulation of cysteine-type endopeptidas... | 17735 | 179  | 196 | 9  | 2.02  | 2.00E-04 | 4.455446 | AQP1;GPX1;IFI27;PRDX5;RAG1;SFRP2;SIAH2;SNCA;WNT9A                                            |
| pink   | BP | GO:0046501 | protoporphyrinogen IX metabolic process     | 17735 | 11   | 196 | 3  | 0.12  | 0.00022  | 25       | ALAS2;FECH;HMBS                                                                              |
| pink   | BP | GO:0034599 | cellular response to oxidative stress       | 17735 | 108  | 196 | 7  | 1.22  | 0.00022  | 5.737705 | AQP1;GPX1;HBA2;HBB;PRDX5;PRDX6;SNCA                                                          |
| pink   | BP | GO:0015711 | organic anion transport                     | 17735 | 266  | 196 | 11 | 3     | 0.00022  | 3.666667 | AQP1;CA1;HBA2;HBB;RHAG;SLC38A5;SLC4A1;SLC6A19;SLC6A8;SNCA;XK                                 |
| pink   | BP | GO:0034614 | cellular response to reactive oxygen spe... | 17735 | 80   | 196 | 6  | 0.9   | 0.00028  | 6.666667 | AQP1;GPX1;HBA2;HBB;PRDX5;PRDX6                                                               |
| pink   | MF | GO:0005215 | transporter activity                        | 17735 | 1166 | 196 | 27 | 13.19 | 0.00028  | 2.047005 | ABCC13;ABCC4;ABCG2;AQP1;BEST2;FKBP18;HBA2;HBB;HBD;HBG1;HBG2;HBM;HBQ1;HBZ;KCNH2;RHAG;RH       |
| pink   | BP | GO:0006970 | response to osmotic stress                  | 17735 | 55   | 196 | 5  | 0.62  | 0.00038  | 8.064516 | AQP1;CSDA;GYPA;NEDD4L;SLC2A4                                                                 |
| pink   | BP | GO:0071470 | cellular response to osmotic stress         | 17735 | 14   | 196 | 3  | 0.16  | 0.00047  | 18.75    | AQP1;CSDA;SLC2A4                                                                             |
| pink   | BP | GO:0055072 | iron ion homeostasis                        | 17735 | 88   | 196 | 6  | 0.99  | 0.00047  | 6.060606 | ABCG2;ALAS2;EPB42;FECH;FTL;SLC25A37                                                          |
| pink   | BP | GO:0042440 | pigment metabolic process                   | 17735 | 59   | 196 | 5  | 0.67  | 0.00053  | 7.462687 | ALAS2;BLVRB;FECH;HMBS;SLC25A39                                                               |
| pink   | BP | GO:0006979 | response to oxidative stress                | 17735 | 253  | 196 | 10 | 2.85  | 6.00E-04 | 3.508772 | AQP1;FKBP18;GPX1;HBA2;HBB;KRT1;PRDX5;PRDX6;PTRN;SNCA                                         |
| pink   | BP | GO:0090101 | negative regulation of transmembrane rec... | 17735 | 95   | 196 | 6  | 1.07  | 0.00071  | 5.607477 | BAMBI;NEDD4L;PPM1A;SFRP2;UBA52;UBB                                                           |
| pink   | BP | GO:0051188 | cofactor biosynthetic process               | 17735 | 132  | 196 | 7  | 1.49  | 0.00074  | 4.697987 | ALAS2;ANK1;FECH;HMBS;SLC25A39;SNCA;SPTA1                                                     |
| pink   | MF | GO:0016209 | antioxidant activity                        | 17735 | 65   | 196 | 5  | 0.74  | 0.00083  | 6.756757 | GPX1;HBA2;HBB;PRDX5;PRDX6                                                                    |
| pink   | BP | GO:0030512 | negative regulation of transforming grow... | 17735 | 66   | 196 | 5  | 0.74  | 0.00088  | 6.756757 | BAMBI;NEDD4L;PPM1A;UBA52;UBB                                                                 |
| pink   | BP | GO:0006820 | anion transport                             | 17735 | 317  | 196 | 11 | 3.58  | 0.00095  | 3.072626 | AQP1;CA1;HBA2;HBB;RHAG;SLC38A5;SLC4A1;SLC6A19;SLC6A8;SNCA;XK                                 |
| pink   | BP | GO:1901566 | organonitrogen compound biosynthetic pro... | 17735 | 647  | 196 | 17 | 7.3   | 0.00103  | 2.328767 | A4GALT;ACHE;ALAS2;ANK1;AQP1;CHPT1;FECH;GALNT5;GMPR;HAGH;HMBS;OAZ1;ODC1;SLC25A39;SNCA;SF      |
| pink   | MF | GO:0022892 | substrate-specific transporter activity     | 17735 | 948  | 196 | 22 | 10.72 | 0.00105  | 2.052239 | AQP1;BEST2;FKBP18;HBA2;HBB;HBD;HBG1;HBG2;HBM;HBQ1;HBZ;KCNH2;RHAG;RHCE;SLC14A1;SLC25A37;I     |
| pink   | MF | GO:0008509 | anion transmembrane transporter activity    | 17735 | 227  | 196 | 9  | 2.57  | 0.00113  | 3.501946 | BEST2;RHAG;RHCE;SLC14A1;SLC38A5;SLC4A1;SLC6A19;SLC6A8;SLC6A9                                 |
| pink   | BP | GO:0060216 | definitive hemopoiesis                      | 17735 | 19   | 196 | 3  | 0.21  | 0.0012   | 14.28571 | GATA1;LYL1;TAL1                                                                              |
| pink   | MF | GO:0005328 | neurotransmitter:sodium symporter activi... | 17735 | 19   | 196 | 3  | 0.21  | 0.00121  | 14.28571 | SLC6A19;SLC6A8;SLC6A9                                                                        |
| pink   | CC | GO:0005938 | cell cortex                                 | 17735 | 186  | 196 | 8  | 2.11  | 0.0013   | 3.791469 | ANK1;EPB42;EPB49;GYPC;SLC4A1;SNCA;SPTA1;TMOD1                                                |
| pink   | BP | GO:0051186 | cofactor metabolic process                  | 17735 | 233  | 196 | 9  | 2.63  | 0.00132  | 3.422053 | ALAS2;ANK1;BLVRB;FECH;HMBS;PRDX5;SLC25A39;SNCA;SPTA1                                         |

|      |    |            |                                             |       |      |     |    |       |         |           |                                                                                               |
|------|----|------------|---------------------------------------------|-------|------|-----|----|-------|---------|-----------|-----------------------------------------------------------------------------------------------|
| pink | MF | GO:0046983 | protein dimerization activity               | 17735 | 909  | 196 | 21 | 10.28 | 0.00144 | 2.042802  | ABCG2;ACHE;ADIPOR1;BCL2L1;CTSE;GYPA;HPS1;LYL1;MEF2B;MXI1;PBX1;PLVAP;PRDX5;RAG1;RAP1GAP;SIV    |
| pink | BP | GO:1901701 | cellular response to oxygen-containing c... | 17735 | 387  | 196 | 12 | 4.36  | 0.00148 | 2.752294  | AQP1;BCL2L1;FKBP1B;GPX1;HBA2;HBB;PDE3A;PRDX5;PRDX6;SNCA;TESC;WNT9A                            |
| pink | BP | GO:0051346 | negative regulation of hydrolase activit... | 17735 | 238  | 196 | 9  | 2.68  | 0.00153 | 3.358209  | AQP1;FKBP1B;GPX1;PRDX5;RAG1;SFRP2;SIAH2;SNCA;WNT9A                                            |
| pink | MF | GO:0015175 | neutral amino acid transmembrane transpo... | 17735 | 21   | 196 | 3  | 0.24  | 0.00163 | 12.5      | SLC38A5;SLC6A19;SLC6A9                                                                        |
| pink | BP | GO:0050801 | ion homeostasis                             | 17735 | 679  | 196 | 17 | 7.66  | 0.00173 | 2.219321  | ABCG2;ALAS2;BCL2L1;BEST2;EPB42;FECH;FKBP1B;FTL;KCNH2;NEDD4L;RHAG;RNF10;SLC25A37;SLC4A1;SNCA   |
| pink | BP | GO:0000080 | G1 phase of mitotic cell cycle              | 17735 | 46   | 196 | 4  | 0.52  | 0.00176 | 7.692308  | E2F2;TFDP1;UBA52;UBB                                                                          |
| pink | BP | GO:0046148 | pigment biosynthetic process                | 17735 | 46   | 196 | 4  | 0.52  | 0.00176 | 7.692308  | ALAS2;FECH;HMBS;SLC25A39                                                                      |
| pink | CC | GO:0005829 | cytosol                                     | 17735 | 2362 | 196 | 42 | 26.79 | 0.0018  | 1.567749  | AHSP;ANK1;BCL2L1;BLVRB;CA1;FKBP1B;FTL;GFAP;GMPR;GPX1;GUK1;HBA2;HBB;HBD;HGB1;HGB2;HBM;HBC      |
| pink | BP | GO:0000122 | negative regulation of transcription fro... | 17735 | 507  | 196 | 14 | 5.72  | 0.00182 | 2.447552  | CSDA;FHL2;HBZ;KANK2;MXI1;NEDD4L;NFK1;PPM1A;SIM2;SOX6;TAL1;UBA52;UBB;YBX1                      |
| pink | BP | GO:0071560 | cellular response to transforming growth... | 17735 | 198  | 196 | 8  | 2.23  | 0.00183 | 3.587444  | BAMBI;NEDD4L;PDE3A;PPM1A;SOX6;TFDP1;UBA52;UBB                                                 |
| pink | BP | GO:0071559 | response to transforming growth factor b... | 17735 | 199  | 196 | 8  | 2.24  | 0.00189 | 3.571429  | BAMBI;NEDD4L;PDE3A;PPM1A;SOX6;TFDP1;UBA52;UBB                                                 |
| pink | MF | GO:0005200 | structural constituent of cytoskeleton      | 17735 | 78   | 196 | 5  | 0.88  | 0.0019  | 5.681818  | ANK1;EPB42;GFAP;KRT1;SPTA1                                                                    |
| pink | BP | GO:0052548 | regulation of endopeptidase activity        | 17735 | 248  | 196 | 9  | 2.8   | 0.00202 | 3.214286  | AQP1;GPX1;IFI27;PRDX5;RAG1;SFRP2;SIAH2;SNCA;WNT9A                                             |
| pink | BP | GO:0051318 | G1 phase                                    | 17735 | 48   | 196 | 4  | 0.54  | 0.00206 | 7.407407  | E2F2;TFDP1;UBA52;UBB                                                                          |
| pink | BP | GO:0030219 | megakaryocyte differentiation               | 17735 | 23   | 196 | 3  | 0.26  | 0.00211 | 11.53846  | GATA1;TAL1;TESC                                                                               |
| pink | BP | GO:0060548 | negative regulation of cell death           | 17735 | 633  | 196 | 16 | 7.14  | 0.00214 | 2.240896  | AQP1;BAG1;BCL2L1;CSDA;FHL2;GATA1;GPX1;KANK2;PDE3A;PRDX5;RAG1;SFRP2;SIAH2;SNCA;STRADB;WNT9A    |
| pink | MF | GO:0003730 | mRNA 3'-UTR binding                         | 17735 | 24   | 196 | 3  | 0.27  | 0.00242 | 11.111111 | CSDA;IGF2BP2;RBM38                                                                            |
| pink | MF | GO:0005326 | neurotransmitter transporter activity       | 17735 | 24   | 196 | 3  | 0.27  | 0.00242 | 11.111111 | SLC6A19;SLC6A8;SLC6A9                                                                         |
| pink | BP | GO:0052547 | regulation of peptidase activity            | 17735 | 255  | 196 | 9  | 2.88  | 0.00244 | 3.125     | AQP1;GPX1;IFI27;PRDX5;RAG1;SFRP2;SIAH2;SNCA;WNT9A                                             |
| pink | BP | GO:0090288 | negative regulation of cellular response... | 17735 | 86   | 196 | 5  | 0.97  | 0.00287 | 5.154639  | BAMBI;NEDD4L;PPM1A;UBA52;UBB                                                                  |
| pink | BP | GO:0043489 | RNA stabilization                           | 17735 | 26   | 196 | 3  | 0.29  | 0.00303 | 10.34483  | CSDA;RBM38;YBX1                                                                               |
| pink | BP | GO:0048255 | mRNA stabilization                          | 17735 | 26   | 196 | 3  | 0.29  | 0.00303 | 10.34483  | CSDA;RBM38;YBX1                                                                               |
| pink | BP | GO:0000082 | G1/S transition of mitotic cell cycle       | 17735 | 215  | 196 | 8  | 2.42  | 0.00306 | 3.305785  | CDC34;GSP11;KANK2;RBM38;TFDP1;UBA52;UBB;WNT9A                                                 |
| pink | CC | GO:0031672 | A band                                      | 17735 | 26   | 196 | 3  | 0.29  | 0.0031  | 10.34483  | ANK1;FHL2;MYL4                                                                                |
| pink | BP | GO:0002376 | immune system process                       | 17735 | 1816 | 196 | 33 | 20.48 | 0.00356 | 1.611328  | AHSP;ALAS2;ANK1;BCL2L1;CTSE;DYRK3;ECSIT;EPB42;FECH;FKBP1B;GATA1;GLRX5;GPX1;HBZ;HPS1;IFI27;KLF |
| pink | BP | GO:0030851 | granulocyte differentiation                 | 17735 | 28   | 196 | 3  | 0.32  | 0.00375 | 9.375     | GATA1;TAL1;TESC                                                                               |
| pink | BP | GO:0071804 | cellular potassium ion transport            | 17735 | 28   | 196 | 3  | 0.32  | 0.00375 | 9.375     | AQP1;KCNH2;NEDD4L                                                                             |
| pink | BP | GO:0071805 | potassium ion transmembrane transport       | 17735 | 28   | 196 | 3  | 0.32  | 0.00375 | 9.375     | AQP1;KCNH2;NEDD4L                                                                             |
| pink | BP | GO:0043069 | negative regulation of programmed cell d... | 17735 | 610  | 196 | 15 | 6.88  | 0.0038  | 2.180233  | AQP1;BAG1;BCL2L1;CSDA;FHL2;GATA1;GPX1;KANK2;PDE3A;PRDX5;RAG1;SFRP2;SIAH2;SNCA;STRADB          |
| pink | BP | GO:0017015 | regulation of transforming growth factor... | 17735 | 92   | 196 | 5  | 1.04  | 0.00384 | 4.807692  | BAMBI;NEDD4L;PPM1A;UBA52;UBB                                                                  |
| pink | BP | GO:0048878 | chemical homeostasis                        | 17735 | 872  | 196 | 19 | 9.83  | 0.00442 | 1.932859  | ABCG2;ALAS2;AQP1;BCL2L1;BEST2;EPB42;FECH;FKBP1B;FTL;KCNH2;NEDD4L;RHAG;RNF10;SLC25A37;SLC2A    |
| pink | BP | GO:0019725 | cellular homeostasis                        | 17735 | 749  | 196 | 17 | 8.45  | 0.00472 | 2.011834  | ABCG2;ALAS2;AQP1;BCL2L1;BEST2;FKBP1B;FTL;GLRX5;GPX1;KCNH2;NEDD4L;RHAG;RNF10;SLC4A1;SNCA;TG    |
| pink | BP | GO:0021670 | lateral ventricle development               | 17735 | 10   | 196 | 2  | 0.11  | 0.00536 | 18.18182  | AQP1;DPCD                                                                                     |
| pink | BP | GO:0035413 | positive regulation of catenin import in... | 17735 | 10   | 196 | 2  | 0.11  | 0.00536 | 18.18182  | BAMBI;SFRP2                                                                                   |
| pink | MF | GO:0030507 | spectrin binding                            | 17735 | 10   | 196 | 2  | 0.11  | 0.00539 | 18.18182  | ANK1;PTPRN                                                                                    |
| pink | BP | GO:0008584 | male gonad development                      | 17735 | 100  | 196 | 5  | 1.13  | 0.00547 | 4.424779  | BCL2L1;CSDA;GATA1;SFRP2;TESC                                                                  |
| pink | MF | GO:0015171 | amino acid transmembrane transporter act... | 17735 | 63   | 196 | 4  | 0.71  | 0.00561 | 5.633803  | SLC38A5;SLC6A19;SLC6A8;SLC6A9                                                                 |
| pink | BP | GO:0007009 | plasma membrane organization                | 17735 | 102  | 196 | 5  | 1.15  | 0.00594 | 4.347826  | A4GALT;ANK1;BCL2L1;SPTA1;TESC                                                                 |
| pink | BP | GO:2000045 | regulation of G1/S transition of mitotic... | 17735 | 104  | 196 | 5  | 1.17  | 0.00644 | 4.273504  | KANK2;RBM38;UBA52;UBB;WNT9A                                                                   |
| pink | BP | GO:0006596 | polyamine biosynthetic process              | 17735 | 11   | 196 | 2  | 0.12  | 0.0065  | 16.66667  | OAZ1;ODC1                                                                                     |
| pink | BP | GO:0070935 | 3'-UTR-mediated mRNA stabilization          | 17735 | 11   | 196 | 2  | 0.12  | 0.0065  | 16.66667  | CSDA;RBM38                                                                                    |
| pink | MF | GO:0005372 | water transmembrane transporter activity    | 17735 | 11   | 196 | 2  | 0.12  | 0.00654 | 16.66667  | AQP1;SLC14A1                                                                                  |
| pink | BP | GO:0031647 | regulation of protein stability             | 17735 | 105  | 196 | 5  | 1.18  | 0.0067  | 4.237288  | AHSP;DPM2;FBXO7;SNCA;TESC                                                                     |
| pink | BP | GO:0006810 | transport                                   | 17735 | 3358 | 196 | 52 | 37.87 | 0.00685 | 1.373119  | ABCC4;ABCG2;ACHE;ANK1;AQP1;BAMBI;BCL2L1;CA1;EHD2;FKBP1B;FTL;GFAP;HBA2;HBB;HBQ1;HPS1;ITLN1;    |
| pink | BP | GO:0010608 | posttranscriptional regulation of gene e... | 17735 | 355  | 196 | 10 | 4     | 0.00704 | 2.5       | AHSP;CSDA;DPM2;FBXO7;FECH;IGF2BP2;RBM38;SNCA;TESC;YBX1                                        |
| pink | CC | GO:0000151 | ubiquitin ligase complex                    | 17735 | 150  | 196 | 6  | 1.7   | 0.0073  | 3.529412  | DCAF12;DCAF6;FBXO17;FBXO7;SHARPIN                                                             |
| pink | BP | GO:0019935 | cyclic-nucleotide-mediated signaling        | 17735 | 36   | 196 | 3  | 0.41  | 0.00766 | 7.317073  | CDC34;NUDT4;PDE3A                                                                             |
| pink | BP | GO:0046788 | egress of virus within host cell            | 17735 | 12   | 196 | 2  | 0.14  | 0.00775 | 14.28571  | UBA52;UBB                                                                                     |
| pink | MF | GO:0008198 | ferrous iron binding                        | 17735 | 12   | 196 | 2  | 0.14  | 0.0078  | 14.28571  | FECH;SNCA                                                                                     |
| pink | BP | GO:0031333 | negative regulation of protein complex a... | 17735 | 70   | 196 | 4  | 0.79  | 0.00803 | 5.063291  | EPB49;PPM1A;SNCA;SPTA1                                                                        |
| pink | BP | GO:0043066 | negative regulation of apoptotic process    | 17735 | 602  | 196 | 14 | 6.79  | 0.00824 | 2.061856  | AQP1;BAG1;BCL2L1;CSDA;FHL2;GATA1;GPX1;PDE3A;PRDX5;RAG1;SFRP2;SIAH2;SNCA;STRADB                |
| pink | BP | GO:0043488 | regulation of mRNA stability                | 17735 | 37   | 196 | 3  | 0.42  | 0.00826 | 7.142857  | CSDA;RBM38;YBX1                                                                               |
| pink | BP | GO:0006873 | cellular ion homeostasis                    | 17735 | 604  | 196 | 14 | 6.81  | 0.00847 | 2.0558    | ABCG2;ALAS2;BCL2L1;BEST2;FKBP1B;FTL;KCNH2;NEDD4L;RHAG;RNF10;SLC4A1;SNCA;TGM2;UTS2R            |
| pink | BP | GO:2000602 | regulation of interphase of mitotic cell... | 17735 | 157  | 196 | 6  | 1.77  | 0.00877 | 3.389831  | BCL2L1;KANK2;RBM38;UBA52;UBB;WNT9A                                                            |
| pink | BP | GO:0010035 | response to inorganic substance             | 17735 | 312  | 196 | 9  | 3.52  | 0.00897 | 2.556818  | AQP1;FKBP1B;GPX1;HBA2;HBB;NEDD4L;PRDX5;PRDX6;SNCA                                             |
| pink | BP | GO:0042026 | protein refolding                           | 17735 | 13   | 196 | 2  | 0.15  | 0.00909 | 13.33333  | BAG1;FKBP1B                                                                                   |
| pink | BP | GO:0051234 | establishment of localization               | 17735 | 3408 | 196 | 52 | 38.44 | 0.00924 | 1.352758  | ABCC4;ABCG2;ACHE;ANK1;AQP1;BAMBI;BCL2L1;CA1;EHD2;FKBP1B;FTL;GFAP;HBA2;HBB;HBQ1;HPS1;ITLN1;    |
| pink | BP | GO:0055080 | cation homeostasis                          | 17735 | 430  | 196 | 11 | 4.85  | 0.00959 | 2.268041  | ABCG2;ALAS2;EPB42;FECH;FKBP1B;FTL;NEDD4L;SLC25A37;SNCA;TGM2;UTS2R                             |
| pink | BP | GO:0048469 | cell maturation                             | 17735 | 116  | 196 | 5  | 1.31  | 0.01009 | 3.816794  | EPB42;HBZ;KLF1;PDE3A;TAL1                                                                     |
| pink | BP | GO:0048513 | organ development                           | 17735 | 2404 | 196 | 39 | 27.11 | 0.01029 | 1.438584  | ACHE;AHSP;ALAS2;ANK1;AQP1;BAMBI;BCL2L1;CSDA;DPCD;DYRK3;EPB42;FECH;FHL2;GATA1;GLRX5;GPX1;HI    |
| pink | BP | GO:0017102 | organic substance transport                 | 17735 | 1950 | 196 | 33 | 21.99 | 0.01037 | 1.500682  | ABCG2;ACHE;ANK1;AQP1;BAMBI;CA1;FKBP1B;HBA2;HBB;HPS1;ITLN1;MXI1;NUDT4;OSBP2;RAB31L;RHAG;R      |
| pink | BP | GO:0046546 | development of primary male sexual chara... | 17735 | 117  | 196 | 5  | 1.32  | 0.01045 | 3.787879  | BCL2L1;CSDA;GATA1;SFRP2;TESC                                                                  |
| pink | BP | GO:0021781 | glial cell fate commitment                  | 17735 | 14   | 196 | 2  | 0.16  | 0.01053 | 12.5      | SOX6;TAL1                                                                                     |
| pink | MF | GO:0015665 | alcohol transmembrane transporter activi... | 17735 | 14   | 196 | 2  | 0.16  | 0.01059 | 12.5      | AQP1;SLC6A8                                                                                   |
| pink | BP | GO:0051239 | regulation of multicellular organismal p... | 17735 | 1804 | 196 | 31 | 20.35 | 0.0106  | 1.523342  | ACHE;AQP1;BAMBI;CNN1;CSDA;DARC;FKBP1B;GATA1;GFAP;GPX1;HEMGN;IGF2BP2;KCNH2;KRT1;MBNL3;M        |
| pink | BP | GO:0051494 | negative regulation of cytoskeleton orga... | 17735 | 76   | 196 | 4  | 0.86  | 0.01067 | 4.651163  | EPB49;ESPN;SNCA;SPTA1                                                                         |
| pink | BP | GO:0043487 | regulation of RNA stability                 | 17735 | 41   | 196 | 3  | 0.46  | 0.01097 | 6.521739  | CSDA;RBM38;YBX1                                                                               |
| pink | BP | GO:0055085 | transmembrane transport                     | 17735 | 688  | 196 | 15 | 7.76  | 0.01107 | 1.93299   | ABCC4;ABCG2;AQP1;FKBP1B;FTL;KCNH2;NEDD4L;RHAG;SLC14A1;SLC2A4;SLC38A5;SLC4A1;SLC6A19;SLC6A9    |
| pink | BP | GO:0090092 | regulation of transmembrane receptor pro... | 17735 | 167  | 196 | 6  | 1.88  | 0.01167 | 3.191489  | BAMBI;NEDD4L;PPM1A;SFRP2;UBA52;UBB                                                            |

|      |    |            |                                             |       |      |     |     |        |         |          |                                                                                             |
|------|----|------------|---------------------------------------------|-------|------|-----|-----|--------|---------|----------|---------------------------------------------------------------------------------------------|
| pink | MF | GO:0008092 | cytoskeletal protein binding                | 17735 | 627  | 196 | 14  | 7.09   | 0.01188 | 1.974612 | ANK1;CNN1;EPB49;ESPN;KLC3;MYL4;PTPRN;RHAG;SGIP1;SLC4A1;SNCA;SPTA1;TMOD1;TNS1                |
| pink | BP | GO:0001919 | regulation of receptor recycling            | 17735 | 15   | 196 | 2   | 0.17   | 0.01206 | 11.76471 | ACHE;SNCA                                                                                   |
| pink | MF | GO:0005527 | macrolide binding                           | 17735 | 15   | 196 | 2   | 0.17   | 0.01213 | 11.76471 | FKBP1B;FKBP8                                                                                |
| pink | MF | GO:0005528 | FK506 binding                               | 17735 | 15   | 196 | 2   | 0.17   | 0.01213 | 11.76471 | FKBP1B;FKBP8                                                                                |
| pink | BP | GO:0007178 | transmembrane receptor protein serine/th... | 17735 | 273  | 196 | 8   | 3.08   | 0.01232 | 2.597403 | BAMBI;ECIS1;NEDD4L;PPM1A;SFRP2;TFDP1;UBA52;UBB                                              |
| pink | BP | GO:0072593 | reactive oxygen species metabolic proces... | 17735 | 123  | 196 | 5   | 1.39   | 0.01278 | 3.597122 | GPX1;HBA2;HBB;PRDX5;PRDX6                                                                   |
| pink | BP | GO:0032844 | regulation of homeostatic process           | 17735 | 275  | 196 | 8   | 3.1    | 0.01283 | 2.580645 | FKBP1B;GATA1;KCNH2;RNF10;SGIP1;SNCA;TAL1;UTS2R                                              |
| pink | BP | GO:0007179 | transforming growth factor beta receptor... | 17735 | 171  | 196 | 6   | 1.93   | 0.013   | 3.108808 | BAMBI;NEDD4L;PPM1A;TFDP1;UBA52;UBB                                                          |
| pink | BP | GO:0044765 | single-organism transport                   | 17735 | 2753 | 196 | 43  | 31.05  | 0.01313 | 1.384863 | ABCC4;ABCG2;ACHE;ANK1;AQP1;BAMBI;BCL2L1;CA1;EHD2;FKBP1B;FTL;GFAP;HBA2;HBB;HBQ1;HPS1;ITLN1;  |
| pink | BP | GO:0006865 | amino acid transport                        | 17735 | 124  | 196 | 5   | 1.4    | 0.01319 | 3.571429 | SLC38A5;SLC6A19;SLC6A8;SNCA;XK                                                              |
| pink | BP | GO:1901564 | organonitrogen compound metabolic proces... | 17735 | 1688 | 196 | 29  | 19.04  | 0.01352 | 1.523109 | A4GALT;ABCG2;ACHE;ALAS2;ANK1;AQP1;BLVRB;CHPT1;FECH;GALNT5;GCAT;GMPR;GPX1;GSPT1;GUK1;HAG     |
| pink | BP | GO:0046661 | male sex differentiation                    | 17735 | 125  | 196 | 5   | 1.41   | 0.01362 | 3.546099 | BCL2L1;CSDA;GATA1;SFRP2;TESC                                                                |
| pink | BP | GO:0060251 | regulation of glial cell proliferation      | 17735 | 16   | 196 | 2   | 0.18   | 0.01368 | 11.11111 | GFAP;RNF10                                                                                  |
| pink | MF | GO:0016780 | phosphotransferase activity, for other s... | 17735 | 16   | 196 | 2   | 0.18   | 0.01376 | 11.11111 | CHPT1;KLC3                                                                                  |
| pink | MF | GO:0051184 | cofactor transporter activity               | 17735 | 16   | 196 | 2   | 0.18   | 0.01376 | 11.11111 | ABCG2;SLC6A8                                                                                |
| pink | CC | GO:0031430 | M band                                      | 17735 | 16   | 196 | 2   | 0.18   | 0.0138  | 11.11111 | ANK1;FHL2                                                                                   |
| pink | BP | GO:0031575 | mitotic cell cycle G1/S transition check... | 17735 | 82   | 196 | 4   | 0.92   | 0.01381 | 4.347826 | RBM38;UBA52;UBB;WNT9A                                                                       |
| pink | BP | GO:0021700 | developmental maturation                    | 17735 | 174  | 196 | 6   | 1.96   | 0.01406 | 3.061224 | EPB42;HBZ;KLF1;LYL1;PDE3A;TAL1                                                              |
| pink | BP | GO:0032272 | negative regulation of protein polymeriz... | 17735 | 45   | 196 | 3   | 0.51   | 0.01414 | 5.882353 | EPB49;SNCA;SPTA1                                                                            |
| pink | BP | GO:0006352 | DNA-dependent transcription, initiation     | 17735 | 228  | 196 | 7   | 2.57   | 0.01488 | 2.723735 | E2F2;NEDD4L;POLR1D;PPM1A;TFDP1;UBA52;UBB                                                    |
| pink | BP | GO:0061061 | muscle structure development                | 17735 | 460  | 196 | 11  | 5.19   | 0.01525 | 2.119461 | ACHE;CSDA;FHL2;GPX1;MBNL3;MEF2B;MYL4;RBM38;SOX6;TMOD1;YBX1                                  |
| pink | BP | GO:0072661 | protein targeting to plasma membrane        | 17735 | 17   | 196 | 2   | 0.19   | 0.01539 | 10.52632 | ANK1;TESC                                                                                   |
| pink | BP | GO:0003018 | vascular process in circulatory system      | 17735 | 129  | 196 | 5   | 1.45   | 0.01543 | 3.448276 | GPX1;HBB;KEL;PDE3A;UTS2R                                                                    |
| pink | BP | GO:0071495 | cellular response to endogenous stimulus    | 17735 | 716  | 196 | 15  | 8.08   | 0.01545 | 1.856436 | ADIPOR1;AQP1;BAMBI;BCL2L1;GATA1;NEDD4L;PDE3A;PPM1A;SLC2A4;SNCA;SOX6;STRADB;TFDP1;UBA52;U    |
| pink | BP | GO:0090002 | establishment of protein localization to... | 17735 | 47   | 196 | 3   | 0.53   | 0.01589 | 5.660377 | ANK1;BCL2L1;TESC                                                                            |
| pink | BP | GO:0071779 | G1/S transition checkpoint                  | 17735 | 86   | 196 | 4   | 0.97   | 0.0162  | 4.123711 | RBM38;UBA52;UBB;WNT9A                                                                       |
| pink | MF | GO:0005515 | protein binding                             | 17735 | 7306 | 196 | 97  | 82.65  | 0.01653 | 1.173624 | ABCG2;ACHE;ADIPOR1;AHSP;ALAS2;ANK1;AQP1;ARHGFEF37;BAG1;BAMBI;BCAM;BCL2L1;CDC34;CNN1;CSDA    |
| pink | BP | GO:0035872 | nucleotide-binding domain, leucine rich ... | 17735 | 48   | 196 | 3   | 0.54   | 0.01681 | 5.555556 | BCL2L1;UBA52;UBB                                                                            |
| pink | BP | GO:0019067 | viral assembly, maturation, egress, and ... | 17735 | 18   | 196 | 2   | 0.2    | 0.01718 | 10       | UBA52;UBB                                                                                   |
| pink | BP | GO:0042401 | cellular biogenic amine biosynthetic pro... | 17735 | 18   | 196 | 2   | 0.2    | 0.01718 | 10       | OAZ1;ODC1                                                                                   |
| pink | BP | GO:2001234 | negative regulation of apoptotic signali... | 17735 | 18   | 196 | 2   | 0.2    | 0.01718 | 10       | BCL2L1;SLAH2                                                                                |
| pink | MF | GO:0004602 | glutathione peroxidase activity             | 17735 | 18   | 196 | 2   | 0.2    | 0.01729 | 10       | GPX1;PRDX6                                                                                  |
| pink | MF | GO:0005001 | transmembrane receptor protein tyrosine ... | 17735 | 18   | 196 | 2   | 0.2    | 0.01729 | 10       | PTPRF;PTPRN                                                                                 |
| pink | MF | GO:0019198 | transmembrane receptor protein phosphata... | 17735 | 18   | 196 | 2   | 0.2    | 0.01729 | 10       | PTPRF;PTPRN                                                                                 |
| pink | MF | GO:0030506 | ankyrin binding                             | 17735 | 18   | 196 | 2   | 0.2    | 0.01729 | 10       | RHAG;SLC4A1                                                                                 |
| pink | MF | GO:1901618 | organic hydroxy compound transmembrane t... | 17735 | 18   | 196 | 2   | 0.2    | 0.01729 | 10       | AQP1;SLC6A8                                                                                 |
| pink | BP | GO:0051329 | interphase of mitotic cell cycle            | 17735 | 408  | 196 | 10  | 4.6    | 0.0174  | 2.173913 | BCL2L1;CDC34;E2F2;GSPT1;KANK2;RBM38;TFDP1;UBA52;UBB;WNT9A                                   |
| pink | BP | GO:0008015 | blood circulation                           | 17735 | 349  | 196 | 9   | 3.94   | 0.01756 | 2.284264 | FKBP1B;GPX1;HBB;KCNH2;KEL;MYL4;NEDD4L;PDE3A;UTS2R                                           |
| pink | BP | GO:0003013 | circulatory system process                  | 17735 | 350  | 196 | 9   | 3.95   | 0.01785 | 2.278481 | FKBP1B;GPX1;HBB;KCNH2;KEL;MYL4;NEDD4L;PDE3A;UTS2R                                           |
| pink | MF | GO:0015370 | solute:sodium symporter activity            | 17735 | 49   | 196 | 3   | 0.55   | 0.01792 | 5.454545 | SLC6A19;SLC6A8;SLC6A9                                                                       |
| pink | CC | GO:0005737 | cytoplasm                                   | 17735 | 9016 | 196 | 117 | 102.25 | 0.0181  | 1.144254 | A4GALT;ABCC4;ACHE;AHSP;ALAS2;ANK1;AQP1;ARHGFEF37;BAG1;BAMBI;BCL2L1;BLVRB;C1orf116;C9orf3;C9 |
| pink | BP | GO:0055082 | cellular chemical homeostasis               | 17735 | 665  | 196 | 14  | 7.5    | 0.01833 | 1.866667 | ABCG2;ALAS2;BCL2L1;BEST2;FKBP1B;FTL;KCNH2;NEDD4L;RHAG;RNF10;SLC4A1;SNCA;TGM2;UTS2R          |
| pink | CC | GO:0031461 | cullin-RING ubiquitin ligase complex        | 17735 | 89   | 196 | 4   | 1.01   | 0.0185  | 3.960396 | DCAF12;DCAF6;FBXO17;FBXO9                                                                   |
| pink | BP | GO:0071300 | cellular response to retinoic acid          | 17735 | 50   | 196 | 3   | 0.56   | 0.01875 | 5.357143 | AQP1;TESC;WNT9A                                                                             |
| pink | BP | GO:0090150 | establishment of protein localization to... | 17735 | 50   | 196 | 3   | 0.56   | 0.01875 | 5.357143 | ANK1;BCL2L1;TESC                                                                            |
| pink | BP | GO:0051325 | interphase                                  | 17735 | 414  | 196 | 10  | 4.67   | 0.01905 | 2.141328 | BCL2L1;CDC34;E2F2;GSPT1;KANK2;RBM38;TFDP1;UBA52;UBB;WNT9A                                   |
| pink | BP | GO:0000413 | protein peptidyl-prolyl isomerization       | 17735 | 19   | 196 | 2   | 0.21   | 0.01906 | 9.52381  | FKBP1B;FKBP8                                                                                |
| pink | BP | GO:0006972 | hyperosmotic response                       | 17735 | 19   | 196 | 2   | 0.21   | 0.01906 | 9.52381  | AQP1;CSDA                                                                                   |
| pink | BP | GO:0021591 | ventricular system development              | 17735 | 19   | 196 | 2   | 0.21   | 0.01906 | 9.52381  | AQP1;DPCD                                                                                   |
| pink | BP | GO:0045648 | positive regulation of erythrocyte diffe... | 17735 | 19   | 196 | 2   | 0.21   | 0.01906 | 9.52381  | GATA1;TAL1                                                                                  |
| pink | MF | GO:0051537 | 2 iron, 2 sulfur cluster binding            | 17735 | 19   | 196 | 2   | 0.21   | 0.01918 | 9.52381  | FECH;GLRX5                                                                                  |
| pink | BP | GO:0016567 | protein ubiquitination                      | 17735 | 540  | 196 | 12  | 6.09   | 0.01938 | 1.970443 | CDC34;DCAF12;DCAF6;FBXO9;MARCH2;MKRN1;NEDD4L;RAG1;SHARPIN;SLAH2;UBA52;UBB                   |
| pink | BP | GO:0016044 | cellular membrane organization              | 17735 | 417  | 196 | 10  | 4.7    | 0.01992 | 2.12766  | A4GALT;ANK1;BCL2L1;FTL;SNCA;SPTA1;TESC;UBA52;UBB;VTI1B                                      |
| pink | BP | GO:0007093 | mitotic cell cycle checkpoint               | 17735 | 138  | 196 | 5   | 1.56   | 0.02006 | 3.205128 | BCL2L1;RBM38;UBA52;UBB;WNT9A                                                                |
| pink | BP | GO:0044707 | single-multicellular organism process       | 17735 | 5398 | 196 | 74  | 60.88  | 0.02102 | 1.215506 | ABCC4;ACHE;AHSP;ALAS2;ANK1;AQP1;BAMBI;BCL2L1;BEST2;BPGM;CNN1;CSDA;CTSE;DARCC;DPCD;DYRK3;E   |
| pink | BP | GO:0001504 | neurotransmitter uptake                     | 17735 | 20   | 196 | 2   | 0.23   | 0.02103 | 8.695652 | GFAP;SNCA                                                                                   |
| pink | BP | GO:0006595 | polyamine metabolic process                 | 17735 | 20   | 196 | 2   | 0.23   | 0.02103 | 8.695652 | OAZ1;ODC1                                                                                   |
| pink | BP | GO:0007220 | Notch receptor processing                   | 17735 | 20   | 196 | 2   | 0.23   | 0.02103 | 8.695652 | UBA52;UBB                                                                                   |
| pink | BP | GO:0014009 | glial cell proliferation                    | 17735 | 20   | 196 | 2   | 0.23   | 0.02103 | 8.695652 | GFAP;RNF10                                                                                  |
| pink | BP | GO:0046688 | response to copper ion                      | 17735 | 20   | 196 | 2   | 0.23   | 0.02103 | 8.695652 | AQP1;SNCA                                                                                   |
| pink | BP | GO:0075733 | intracellular transport of viral materia... | 17735 | 20   | 196 | 2   | 0.23   | 0.02103 | 8.695652 | UBA52;UBB                                                                                   |
| pink | BP | GO:0061024 | membrane organization                       | 17735 | 421  | 196 | 10  | 4.75   | 0.02112 | 2.105263 | A4GALT;ANK1;BCL2L1;FTL;SNCA;SPTA1;TESC;UBA52;UBB;VTI1B                                      |
| pink | MF | GO:0005217 | intracellular ligand-gated ion channel a... | 17735 | 20   | 196 | 2   | 0.23   | 0.02115 | 8.695652 | AQP1;FKBP1B                                                                                 |
| pink | MF | GO:0043236 | laminin binding                             | 17735 | 20   | 196 | 2   | 0.23   | 0.02115 | 8.695652 | ACHE;BCAM                                                                                   |
| pink | BP | GO:0006458 | 'de novo' protein folding                   | 17735 | 53   | 196 | 3   | 0.6    | 0.02187 | 5        | FKBP1B;TUBB2A;TUBB2B                                                                        |
| pink | MF | GO:0003729 | mRNA binding                                | 17735 | 94   | 196 | 4   | 1.06   | 0.02196 | 3.773585 | CSDA;FECH;IGF2BP2;RBM38                                                                     |
| pink | BP | GO:0010941 | regulation of cell death                    | 17735 | 1242 | 196 | 22  | 14.01  | 0.02266 | 1.570307 | AQP1;BAG1;BCL2L1;CSDA;FHL2;GATA1;GPX1;HBA2;HBB;IFI27;KANK2;PDE3A;PRDX5;RAG1;SFRP2;SLAH2;SN  |
| pink | MF | GO:0046943 | carboxylic acid transmembrane transporte... | 17735 | 95   | 196 | 4   | 1.07   | 0.02273 | 3.738318 | SLC38A5;SLC6A19;SLC6A8;SLC6A9                                                               |
| pink | BP | GO:0043123 | positive regulation of I-kappaB kinase/N... | 17735 | 143  | 196 | 5   | 1.61   | 0.02299 | 3.10559  | PPM1A;SHARPIN;TGM2;UBA52;UBB                                                                |

|      |    |            |                                             |       |       |     |     |        |         |          |                                                                                             |
|------|----|------------|---------------------------------------------|-------|-------|-----|-----|--------|---------|----------|---------------------------------------------------------------------------------------------|
| pink | BP | GO:0001881 | receptor recycling                          | 17735 | 21    | 196 | 2   | 0.24   | 0.02307 | 8.333333 | ACHE;SNCA                                                                                   |
| pink | BP | GO:0009651 | response to salt stress                     | 17735 | 21    | 196 | 2   | 0.24   | 0.02307 | 8.333333 | AQP1;NEDD4L                                                                                 |
| pink | BP | GO:0051354 | negative regulation of oxidoreductase ac... | 17735 | 21    | 196 | 2   | 0.24   | 0.02307 | 8.333333 | PRDX5;SNCA                                                                                  |
| pink | BP | GO:2000736 | regulation of stem cell differentiation     | 17735 | 21    | 196 | 2   | 0.24   | 0.02307 | 8.333333 | SOX6;TAL1                                                                                   |
| pink | MF | GO:0008200 | ion channel inhibitor activity              | 17735 | 21    | 196 | 2   | 0.24   | 0.02321 | 8.333333 | FKBP1B;NEDD4L                                                                               |
| pink | MF | GO:0016248 | channel inhibitor activity                  | 17735 | 21    | 196 | 2   | 0.24   | 0.02321 | 8.333333 | FKBP1B;NEDD4L                                                                               |
| pink | MF | GO:0019894 | kinesin binding                             | 17735 | 21    | 196 | 2   | 0.24   | 0.02321 | 8.333333 | KLC3;SNCA                                                                                   |
| pink | MF | GO:0043027 | cysteine-type endopeptidase inhibitor ac... | 17735 | 21    | 196 | 2   | 0.24   | 0.02321 | 8.333333 | PRDX5;SNCA                                                                                  |
| pink | CC | GO:0080008 | Cul4-RING ubiquitin ligase complex          | 17735 | 21    | 196 | 2   | 0.24   | 0.0233  | 8.333333 | DCAF12;DCAF6                                                                                |
| pink | BP | GO:0045892 | negative regulation of transcription, DN... | 17735 | 823   | 196 | 16  | 9.28   | 0.02361 | 1.724138 | CSDA;FHL2;HBZ;KANK2;MX11;NEDD4L;NFIX;PPM1A;PRDX5;SFRP2;SIM2;SOX6;TAL1;UBA52;UBB;YBX1        |
| pink | BP | GO:0006367 | transcription initiation from RNA polyme... | 17735 | 197   | 196 | 6   | 2.22   | 0.02429 | 2.702703 | E2F2;NEDD4L;PPM1A;TFDP1;UBA52;UBB                                                           |
| pink | BP | GO:0090287 | regulation of cellular response to growt... | 17735 | 146   | 196 | 5   | 1.65   | 0.02487 | 3.030303 | BAMBI;NEDD4L;PPM1A;UBA52;UBB                                                                |
| pink | MF | GO:0005342 | organic acid transmembrane transporter a... | 17735 | 98    | 196 | 4   | 1.11   | 0.02513 | 3.603604 | SLC38A5;SLC6A19;SLC6A8;SLC6A9                                                               |
| pink | MF | GO:0004842 | ubiquitin-protein ligase activity           | 17735 | 253   | 196 | 7   | 2.86   | 0.02513 | 2.447552 | CDC34;FBXO7;FBXO9;MARCH2;NEDD4L;RAG1;SIAH2                                                  |
| pink | BP | GO:0035412 | regulation of catenin import into nucleu... | 17735 | 22    | 196 | 2   | 0.25   | 0.02519 | 8        | BAMBI;SFRP2                                                                                 |
| pink | BP | GO:0060291 | long-term synaptic potentiation             | 17735 | 22    | 196 | 2   | 0.25   | 0.02519 | 8        | GFAP;SNCA                                                                                   |
| pink | BP | GO:0043271 | negative regulation of ion transport        | 17735 | 56    | 196 | 3   | 0.63   | 0.02525 | 4.761905 | FKBP1B;NEDD4L;SNCA                                                                          |
| pink | BP | GO:0071705 | nitrogen compound transport                 | 17735 | 562   | 196 | 12  | 6.34   | 0.02547 | 1.892744 | ABCG2;AQP1;FKBP1B;HBB;NUDT4;RHAG;SLC14A1;SLC38A5;SLC6A19;SLC6A8;SNCA;XK                     |
| pink | BP | GO:2000021 | regulation of ion homeostasis               | 17735 | 147   | 196 | 5   | 1.66   | 0.02552 | 3.012048 | FKBP1B;KCNH2;RNF10;SNCA;UTS2R                                                               |
| pink | CC | GO:0005903 | brush border                                | 17735 | 56    | 196 | 3   | 0.64   | 0.0257  | 4.6875   | AQP1;ESPN;ITLN1                                                                             |
| pink | BP | GO:0071310 | cellular response to organic substance      | 17735 | 1333  | 196 | 23  | 15.03  | 0.02614 | 1.530273 | ADIPOR1;AQP1;BAMBI;BCL2L1;CSDA;DARC;FKBP1B;GATA1;IFI27;NEDD4L;PDE3A;PPM1A;PTPRN;SHARPN;SI   |
| pink | MF | GO:0022857 | transmembrane transporter activity          | 17735 | 901   | 196 | 17  | 10.19  | 0.02655 | 1.668302 | ABCC3;ABCC4;ABCG2;AQP1;BEST2;FKBP1B;KCNH2;RHAG;RHCE;SLC14A1;SLC25A37;SLC2A4;SLC38A5;SLC4    |
| pink | BP | GO:0070887 | cellular response to chemical stimulus      | 17735 | 1709  | 196 | 28  | 19.27  | 0.0268  | 1.453036 | ADIPOR1;AQP1;BAMBI;BCL2L1;CSDA;DARC;FKBP1B;GATA1;GPX1;HBA2;HBB;IFI27;NEDD4L;PDE3A;PPM1A;P   |
| pink | BP | GO:0032409 | regulation of transporter activity          | 17735 | 101   | 196 | 4   | 1.14   | 0.02739 | 3.508772 | FKBP1B;NEDD4L;SNCA;TESC                                                                     |
| pink | BP | GO:0048523 | negative regulation of cellular process     | 17735 | 2883  | 196 | 43  | 32.52  | 0.02749 | 1.322263 | ACHE;AQP1;BAG1;BAMBI;BCL2L1;CDC34;CSDA;EPB49;ESPN;FHL2;FKBP1B;GATA1;GFAP;GPX1;HBZ;IGF2BP2;  |
| pink | MF | GO:0016755 | transferase activity, transferring amino... | 17735 | 23    | 196 | 2   | 0.26   | 0.02755 | 7.692308 | EPB42;TGM2                                                                                  |
| pink | BP | GO:0031646 | positive regulation of neurological syst... | 17735 | 59    | 196 | 3   | 0.67   | 0.0289  | 4.477612 | GFAP;RNF10;SNCA                                                                             |
| pink | BP | GO:0032446 | protein modification by small protein co... | 17735 | 573   | 196 | 12  | 6.46   | 0.029   | 1.857585 | CDC34;DCAF12;DCAF6;FBXO9;MARCH2;MKRN1;NEDD4L;RAG1;SHARPN;SIAH2;UBA52;UBB                    |
| pink | BP | GO:0071214 | cellular response to abiotic stimulus       | 17735 | 153   | 196 | 5   | 1.73   | 0.02965 | 2.890173 | AQP1;BCL2L1;CSDA;SFRP2;SLC2A4                                                               |
| pink | BP | GO:0030104 | water homeostasis                           | 17735 | 24    | 196 | 2   | 0.27   | 0.02966 | 7.407407 | AQP1;NEDD4L                                                                                 |
| pink | BP | GO:0035411 | catenin import into nucleus                 | 17735 | 24    | 196 | 2   | 0.27   | 0.02966 | 7.407407 | BAMBI;SFRP2                                                                                 |
| pink | BP | GO:0015698 | inorganic anion transport                   | 17735 | 60    | 196 | 3   | 0.68   | 0.03018 | 4.411765 | AQP1;RHAG;SLC4A1                                                                            |
| pink | BP | GO:0051591 | response to cAMP                            | 17735 | 60    | 196 | 3   | 0.68   | 0.03018 | 4.411765 | AQP1;PDE3A;PTPRN                                                                            |
| pink | MF | GO:0016491 | oxidoreductase activity                     | 17735 | 709   | 196 | 14  | 8.02   | 0.0305  | 1.745636 | ABCC4;BLVRB;C5orf4;ECSIT;FTL;GLRX5;GMPR;GPX1;HBA2;HBB;PRDX5;PRDX6;SNCA;TSTA3                |
| pink | BP | GO:0006875 | cellular metal ion homeostasis              | 17735 | 324   | 196 | 8   | 3.65   | 0.03066 | 2.191781 | ABCG2;ALAS2;FKBP1B;FTL;NEDD4L;SNCA;TGM2;UTS2R                                               |
| pink | BP | GO:0044057 | regulation of system process                | 17735 | 448   | 196 | 10  | 5.05   | 0.03066 | 1.980198 | ACHE;AQP1;CNN1;FKBP1B;GFAP;KCNH2;MYL4;RNF10;SNCA;UTS2R                                      |
| pink | BP | GO:0044699 | single-organism process                     | 17735 | 10656 | 196 | 131 | 120.18 | 0.03089 | 1.090032 | AGALT;ABCC4;ABCG2;ACHE;ADIPOR1;AHSP;ALAS2;ANK1;AQP1;ARHGFEF37;BAG1;BAMBI;BCAM;BCL2L1;BE1    |
| pink | BP | GO:0051253 | negative regulation of RNA metabolic pro... | 17735 | 852   | 196 | 16  | 9.61   | 0.03119 | 1.664932 | CSDA;FHL2;HBZ;KANK2;MX11;NEDD4L;NFIX;PPM1A;PRDX5;SFRP2;SIM2;SOX6;TAL1;UBA52;UBB;YBX1        |
| pink | BP | GO:0048519 | negative regulation of biological proces... | 17735 | 3150  | 196 | 46  | 35.53  | 0.03134 | 1.294681 | ACHE;AQP1;BAG1;BAMBI;BCL2L1;CDC34;CSDA;EPB49;ESPN;FHL2;FKBP1B;GATA1;GFAP;GPX1;HBZ;IGF2BP2;  |
| pink | BP | GO:2000113 | negative regulation of cellular macromol... | 17735 | 923   | 196 | 17  | 10.41  | 0.0314  | 1.633045 | CSDA;FHL2;HBZ;IGF2BP2;KANK2;MX11;NEDD4L;NFIX;PPM1A;PRDX5;SFRP2;SIM2;SOX6;TAL1;UBA52;UBB;YB  |
| pink | BP | GO:0045639 | positive regulation of myeloid cell diff... | 17735 | 61    | 196 | 3   | 0.69   | 0.03149 | 4.347826 | GATA1;TAL1;TESC                                                                             |
| pink | BP | GO:0006811 | ion transport                               | 17735 | 995   | 196 | 18  | 11.22  | 0.03168 | 1.604278 | ANK1;AQP1;CA1;FKBP1B;FTL;HBA2;HBB;KCNH2;NEDD4L;RHAG;SLC25A37;SLC38A5;SLC4A1;SLC6A19;SLC6A   |
| pink | BP | GO:0051693 | actin filament capping                      | 17735 | 25    | 196 | 2   | 0.28   | 0.03201 | 7.142857 | EPB49;SPTA1                                                                                 |
| pink | BP | GO:0055001 | muscle cell development                     | 17735 | 157   | 196 | 5   | 1.77   | 0.03262 | 2.824859 | FHL2;GPX1;MBNL3;RBM38;TMOD1                                                                 |
| pink | BP | GO:0008219 | cell death                                  | 17735 | 1741  | 196 | 28  | 19.64  | 0.03308 | 1.425662 | AQP1;BAG1;BCL2L1;CSDA;E2F2;FBXO7;FHL2;FKBP8;FTL;GATA1;GPX1;HBA2;HBB;IFI27;KANK2;PDE3A;PRDX5 |
| pink | BP | GO:0043086 | negative regulation of catalytic activit... | 17735 | 519   | 196 | 11  | 5.85   | 0.03325 | 1.880342 | AQP1;FKBP1B;GPX1;PRDX5;RAG1;SFRP2;SIAH2;SNCA;UBA52;UBB;WNT9A                                |
| pink | BP | GO:0051258 | protein polymerization                      | 17735 | 158   | 196 | 5   | 1.78   | 0.03339 | 2.808989 | EPB49;SNCA;SPTA1;TUBB2A;TUBB2B                                                              |
| pink | MF | GO:0019787 | small conjugating protein ligase activit... | 17735 | 269   | 196 | 7   | 3.04   | 0.03348 | 2.302632 | CDC34;FBXO7;FBXO9;MARCH2;NEDD4L;RAG1;SIAH2                                                  |
| pink | BP | GO:0016265 | death                                       | 17735 | 1743  | 196 | 28  | 19.66  | 0.03351 | 1.424212 | AQP1;BAG1;BCL2L1;CSDA;E2F2;FBXO7;FHL2;FKBP8;FTL;GATA1;GPX1;HBA2;HBB;IFI27;KANK2;PDE3A;PRDX5 |
| pink | BP | GO:0048536 | spleen development                          | 17735 | 26    | 196 | 2   | 0.29   | 0.03442 | 6.896552 | EPB42;PBX1                                                                                  |
| pink | MF | GO:0001158 | enhancer sequence-specific DNA binding      | 17735 | 26    | 196 | 2   | 0.29   | 0.03462 | 6.896552 | GATA1;TAL1                                                                                  |
| pink | CC | GO:0019005 | SCF ubiquitin ligase complex                | 17735 | 26    | 196 | 2   | 0.29   | 0.0348  | 6.896552 | FBXO17;FBXO9                                                                                |
| pink | BP | GO:0009891 | positive regulation of biosynthetic proc... | 17735 | 1300  | 196 | 22  | 14.66  | 0.03541 | 1.500682 | BAMBI;CSDA;DCAF6;FHL2;GATA1;HBB;KLF1;LYL1;NFIX;PBX1;PPM1A;PRDX5;RNF10;SFRP2;SNCA;SOX6;TAL1; |
| pink | BP | GO:0048641 | regulation of skeletal muscle tissue dev... | 17735 | 64    | 196 | 3   | 0.72   | 0.03558 | 4.166667 | CSDA;MBNL3;RBM38                                                                            |
| pink | CC | GO:0030666 | endocytic vesicle membrane                  | 17735 | 109   | 196 | 4   | 1.24   | 0.0356  | 3.225806 | RILP;SGIP1;UBA52;UBB                                                                        |
| pink | BP | GO:0051129 | negative regulation of cellular componen... | 17735 | 334   | 196 | 8   | 3.77   | 0.03573 | 2.122016 | BCL2L1;EPB49;ESPN;GFAP;PPM1A;SFRP2;SNCA;SPTA1                                               |
| pink | BP | GO:0051146 | striated muscle cell differentiation        | 17735 | 216   | 196 | 6   | 2.44   | 0.0358  | 2.459016 | FHL2;GPX1;MBNL3;RBM38;TMOD1;YBX1                                                            |
| pink | BP | GO:0050880 | regulation of blood vessel size             | 17735 | 110   | 196 | 4   | 1.24   | 0.03587 | 3.225806 | GPX1;HBB;KEL;UTS2R                                                                          |
| pink | MF | GO:0022890 | inorganic cation transmembrane transport... | 17735 | 459   | 196 | 10  | 5.19   | 0.03605 | 1.926782 | AQP1;FKBP1B;KCNH2;RHAG;RHCE;SLC14A1;SLC25A37;SLC6A19;SLC6A8;SLC6A9                          |
| pink | BP | GO:0050878 | regulation of body fluid levels             | 17735 | 594   | 196 | 12  | 6.7    | 0.03671 | 1.791045 | ABCC4;AQP1;EHD2;GATA1;HBB;HBD;HBG1;HBG2;HPS1;KRT1;PDE3A;UTS2R                               |
| pink | BP | GO:0044767 | single-organism developmental process       | 17735 | 3427  | 196 | 49  | 38.65  | 0.03671 | 1.267788 | ACHE;AHSP;ALAS2;ANK1;AQP1;BAMBI;BCL2L1;CSDA;DPCD;DYRK3;ECSIT;EPB42;FECH;FHL2;GATA1;GFAP;GL  |
| pink | BP | GO:0035150 | regulation of tube size                     | 17735 | 111   | 196 | 4   | 1.25   | 0.0369  | 3.2      | GPX1;HBB;KEL;UTS2R                                                                          |
| pink | BP | GO:0006656 | phosphatidylcholine biosynthetic process    | 17735 | 27    | 196 | 2   | 0.3    | 0.03691 | 6.666667 | ACHE;CHPT1                                                                                  |
| pink | MF | GO:0008514 | organic anion transmembrane transporter ... | 17735 | 112   | 196 | 4   | 1.27   | 0.03833 | 3.149606 | SLC38A5;SLC6A19;SLC6A8;SLC6A9                                                               |
| pink | MF | GO:0015144 | carbohydrate transmembrane transporter a... | 17735 | 28    | 196 | 2   | 0.32   | 0.03968 | 6.25     | AQP1;SLC2A4                                                                                 |
| pink | MF | GO:1901476 | carbohydrate transporter activity           | 17735 | 28    | 196 | 2   | 0.32   | 0.03968 | 6.25     | AQP1;SLC2A4                                                                                 |
| pink | CC | GO:0030016 | myofibril                                   | 17735 | 165   | 196 | 5   | 1.87   | 0.04    | 2.673797 | ANK1;FHL2;MYL4;SLC4A1;TMOD1                                                                 |
| pink | MF | GO:0019904 | protein domain specific binding             | 17735 | 535   | 196 | 11  | 6.05   | 0.04089 | 1.818182 | ARHGFEF37;BCL2L1;EHD2;ESPN;GATA1;GPX1;SFRP2;SGIP1;SNCA;TFDP1;TGM2                           |
| pink | MF | GO:0051015 | actin filament binding                      | 17735 | 68    | 196 | 3   | 0.77   | 0.04177 | 3.896104 | ESPN;MYL4;SPTA1                                                                             |

|           |    |            |                                             |       |       |     |     |        |          |          |                                                                                                         |
|-----------|----|------------|---------------------------------------------|-------|-------|-----|-----|--------|----------|----------|---------------------------------------------------------------------------------------------------------|
| pink      | MF | GO:0005488 | binding                                     | 17735 | 11799 | 196 | 143 | 133.49 | 0.04353  | 1.071241 | ABCC13;ABCC4;ABCG2;ACHE;ADIPOR1;AHSP;ALAS2;ANK1;AQP1;ARHGFB37;BAG1;BAMBI;BCAM;BCL2L1;BL1                |
| pink      | MF | GO:0030551 | cyclic nucleotide binding                   | 17735 | 30    | 196 | 2   | 0.34   | 0.04501  | 5.882353 | FKBP1B;PDE3A                                                                                            |
| pink      | MF | GO:0035326 | enhancer binding                            | 17735 | 30    | 196 | 2   | 0.34   | 0.04501  | 5.882353 | GATA1;TAL1                                                                                              |
| pink      | CC | GO:0031226 | intrinsic to plasma membrane                | 17735 | 1252  | 196 | 21  | 14.2   | 0.046    | 1.478873 | AQP1;BCAM;GYPB;GYPB;GYPB;HPS1;KCNH2;PTPRF;PTPRN;RHAG;RHCE;SLC14A1;SLC24A4;SLC4A1;SLC6A19;S              |
| pink      | MF | GO:0003779 | actin binding                               | 17735 | 351   | 196 | 8   | 3.97   | 0.04637  | 2.015113 | CNN1;EPB49;ESPN;MYL4;SLC4A1;SPTA1;TMOD1;TNS1                                                            |
| pink      | MF | GO:0005198 | structural molecule activity                | 17735 | 620   | 196 | 12  | 7.01   | 0.04923  | 1.71184  | ANK1;EPB42;GFAP;KRT1;KRT79;MYL4;RPL3L1;SPTA1;TUBB2A;TUBB2B;UBA52;WNT9A                                  |
| pink      | CC | GO:0043292 | contractile fiber                           | 17735 | 175   | 196 | 5   | 1.98   | 0.0493   | 2.525253 | ANK1;FH2L;MYL4;SLC4A1;TMOD1                                                                             |
| pink      | CC | GO:0016020 | membrane                                    | 17735 | 7690  | 196 | 99  | 87.21  | 0.0494   | 1.135191 | A4GALT;ABCC13;ABCC4;ABCG2;ACHE;ADIPOR1;ALAS2;ANK1;AQP1;BAMBI;BCAM;BCL2L1;BEST2;BLVRB;C19;               |
| pink      | CC | GO:0044444 | cytoplasmic part                            | 17735 | 6562  | 196 | 86  | 74.42  | 0.0497   | 1.155603 | A4GALT;ABCC4;ACHE;AHSP;ALAS2;ANK1;BCL2L1;BLVRB;CA1;CHPT1;CSDA;CTSE;DPM2;ECST1;EHD2;EMID1;E              |
| midnightb | BP | GO:0034645 | cellular macromolecule biosynthetic proc... | 17735 | 4170  | 65  | 37  | 16.63  | 2.80E-08 | 2.224895 | ATF7IP2;CAPRN2;CAR52;DDX5;GATC;GBGT1;HNRPDL;MRPS25;MTERFD2;NR3C2;PAIP2B;PER3;PIGG;PIGL;PT               |
| midnightb | BP | GO:0009059 | macromolecule biosynthetic process          | 17735 | 4294  | 65  | 37  | 17.13  | 6.50E-08 | 2.159953 | ATF7IP2;CAPRN2;CAR52;DDX5;GATC;GBGT1;HNRPDL;MRPS25;MTERFD2;NR3C2;PAIP2B;PER3;PIGG;PIGL;PT               |
| midnightb | BP | GO:0044249 | cellular biosynthetic process               | 17735 | 5073  | 65  | 39  | 20.23  | 5.00E-07 | 1.92783  | ATF7IP2;CAPRN2;CAR52;DDX5;GATC;GBGT1;GGT1;HNRPDL;MRPS25;MTERFD2;NR3C2;PAIP2B;PER3;PIGG;F                |
| midnightb | BP | GO:0010467 | gene expression                             | 17735 | 4403  | 65  | 36  | 17.56  | 5.30E-07 | 2.050114 | ADAT2;ATF7IP2;CAPRN2;CAR52;DDX5;GATC;HNRPDL;MRPS25;MTERFD2;NR3C2;PAIP2B;PER3;PTCD3;S1PR1                |
| midnightb | BP | GO:1901576 | organic substance biosynthetic process      | 17735 | 5154  | 65  | 39  | 20.56  | 8.00E-07 | 1.896887 | ATF7IP2;CAPRN2;CAR52;DDX5;GATC;GBGT1;GGT1;HNRPDL;MRPS25;MTERFD2;NR3C2;PAIP2B;PER3;PIGG;F                |
| midnightb | BP | GO:0009058 | biosynthetic process                        | 17735 | 5219  | 65  | 39  | 20.82  | 1.20E-06 | 1.873199 | ATF7IP2;CAPRN2;CAR52;DDX5;GATC;GBGT1;GGT1;HNRPDL;MRPS25;MTERFD2;NR3C2;PAIP2B;PER3;PIGG;F                |
| midnightb | BP | GO:0016070 | RNA metabolic process                       | 17735 | 3911  | 65  | 32  | 15.6   | 4.80E-06 | 2.051282 | ADAT2;ATF7IP2;CAPRN2;CAR52;DDX5;GATC;HNRPDL;MTERFD2;NR3C2;PER3;S1PR1;SCML4;SERTAD3;SRTA4;TARBP1;TRAF5;I |
| midnightb | BP | GO:2000112 | regulation of cellular macromolecule bio... | 17735 | 3117  | 65  | 28  | 12.43  | 5.10E-06 | 2.252615 | ATF7IP2;CAPRN2;DDX5;GATC;HNRPDL;PAIP2B;PER3;PTCD3;S1PR1;SCML4;SERTAD3;STAT4;TARBP1;TRAF5;I              |
| midnightb | BP | GO:0010468 | regulation of gene expression               | 17735 | 3347  | 65  | 29  | 13.35  | 6.40E-06 | 2.172285 | ATF7IP2;CAPRN2;DDX5;GATC;HNRPDL;PAIP2B;PER3;PTCD3;S1PR1;SCML4;SERTAD3;STAT4;TARBP1;TRAF5;I              |
| midnightb | BP | GO:0010556 | regulation of macromolecule biosynthetic... | 17735 | 3197  | 65  | 28  | 12.75  | 8.00E-06 | 2.196078 | ATF7IP2;CAPRN2;DDX5;GATC;HNRPDL;PAIP2B;PER3;PTCD3;S1PR1;SCML4;SERTAD3;STAT4;TARBP1;TRAF5;I              |
| midnightb | BP | GO:0031326 | regulation of cellular biosynthetic proc... | 17735 | 3328  | 65  | 28  | 13.27  | 1.90E-05 | 2.110023 | ATF7IP2;CAPRN2;DDX5;GATC;HNRPDL;PAIP2B;PER3;PTCD3;S1PR1;SCML4;SERTAD3;STAT4;TARBP1;TRAF5;I              |
| midnightb | BP | GO:0009889 | regulation of biosynthetic process          | 17735 | 3356  | 65  | 28  | 13.39  | 2.30E-05 | 2.091133 | ATF7IP2;CAPRN2;DDX5;GATC;HNRPDL;PAIP2B;PER3;PTCD3;S1PR1;SCML4;SERTAD3;STAT4;TARBP1;TRAF5;I              |
| midnightb | BP | GO:0090304 | nucleic acid metabolic process              | 17735 | 4431  | 65  | 33  | 17.67  | 2.60E-05 | 1.867572 | ADAT2;ATF7IP2;CAPRN2;CAR52;DDX5;GATC;HNRPDL;MTERFD2;NR3C2;PER3;S1PR1;SCML4;SERTAD3;SRSF1                |
| midnightb | BP | GO:0006351 | transcription, DNA-dependent                | 17735 | 3208  | 65  | 27  | 12.8   | 3.00E-05 | 2.109375 | ATF7IP2;CAPRN2;DDX5;HNRPDL;MTERFD2;NR3C2;PER3;S1PR1;SCML4;SERTAD3;SRSF1;STAT4;TARBP1;TRAI               |
| midnightb | MF | GO:0003676 | nucleic acid binding                        | 17735 | 3299  | 65  | 26  | 12.22  | 3.70E-05 | 2.12766  | CAPRN2;DDX5;HNRPDL;MTERFD2;NR3C2;PAIP2B;PER3;S1PR1;SCML4;SERTAD3;STAT4;TARBP1;TSEN2;UPF3A;ZBTB2         |
| midnightb | BP | GO:0032774 | RNA biosynthetic process                    | 17735 | 3293  | 65  | 27  | 13.13  | 5.00E-05 | 2.056359 | ATF7IP2;CAPRN2;DDX5;HNRPDL;MTERFD2;NR3C2;PER3;S1PR1;SCML4;SERTAD3;SRSF1;STAT4;TARBP1;TRAI               |
| midnightb | BP | GO:0044271 | cellular nitrogen compound biosynthetic ... | 17735 | 3726  | 65  | 29  | 14.86  | 5.70E-05 | 1.951548 | ATF7IP2;CAPRN2;DDX5;GGT1;HNRPDL;MTERFD2;NR3C2;PER3;S1PR1;SCML4;SERTAD3;SLC11A2;SRSF1;STA                |
| midnightb | BP | GO:0044260 | cellular macromolecule metabolic process    | 17735 | 6621  | 65  | 41  | 26.41  | 9.10E-05 | 1.552442 | ADAT2;ATF7IP2;CAPRN2;CAR52;DDX5;FES;GADD45B;GATC;GBGT1;HNRPDL;MRPS25;MTERFD2;NR3C2;PAIP                 |
| midnightb | BP | GO:0019438 | aromatic compound biosynthetic process      | 17735 | 3638  | 65  | 28  | 14.51  | 0.00011  | 1.929704 | ATF7IP2;CAPRN2;DDX5;HNRPDL;MTERFD2;NR3C2;PER3;S1PR1;SCML4;SERTAD3;SLC11A2;SRSF1;STAT4;TAF               |
| midnightb | BP | GO:0018130 | heterocycle biosynthetic process            | 17735 | 3650  | 65  | 28  | 14.56  | 0.00011  | 1.923077 | ATF7IP2;CAPRN2;DDX5;HNRPDL;MTERFD2;NR3C2;PER3;S1PR1;SCML4;SERTAD3;SLC11A2;SRSF1;STAT4;TAF               |
| midnightb | BP | GO:0006355 | regulation of transcription, DNA-depende... | 17735 | 2869  | 65  | 24  | 11.44  | 0.00013  | 2.097902 | ATF7IP2;CAPRN2;DDX5;HNRPDL;PER3;S1PR1;SCML4;SERTAD3;STAT4;TARBP1;TRAF5;ZBTB24;ZFP28;ZMYNC               |
| midnightb | BP | GO:0001252 | regulation of RNA biosynthetic process      | 17735 | 2889  | 65  | 24  | 11.52  | 0.00014  | 2.083333 | ATF7IP2;CAPRN2;DDX5;HNRPDL;PER3;S1PR1;SCML4;SERTAD3;STAT4;TARBP1;TRAF5;ZBTB24;ZFP28;ZMYNC               |
| midnightb | MF | GO:0008270 | zinc ion binding                            | 17735 | 1977  | 65  | 18  | 7.32   | 0.00018  | 2.459016 | ADAT2;CASB;NR3C2;TRAF5;ZBTB24;ZFP28;ZMYND15;ZNF234;ZNF251;ZNF331;ZNF514;ZNF528;ZNF548;ZNF               |
| midnightb | BP | GO:0019222 | regulation of metabolic process             | 17735 | 4834  | 65  | 33  | 19.28  | 0.00018  | 1.711618 | ATF7IP2;CAPRN2;CNST;DDX5;GADD45B;GATC;HNRPDL;MOAP1;PAIP2B;PER3;PTCD3;S1PR1;SCML4;SERTAD                 |
| midnightb | BP | GO:1901362 | organic cyclic compound biosynthetic pro... | 17735 | 3752  | 65  | 28  | 14.97  | 0.00019  | 1.870407 | ATF7IP2;CAPRN2;DDX5;HNRPDL;MTERFD2;NR3C2;PER3;S1PR1;SCML4;SERTAD3;SLC11A2;SRSF1;STAT4;TAF               |
| midnightb | BP | GO:0060255 | regulation of macromolecule metabolic pr... | 17735 | 4178  | 65  | 30  | 16.66  | 0.00019  | 1.80072  | ATF7IP2;CAPRN2;DDX5;GADD45B;GATC;HNRPDL;PAIP2B;PER3;PTCD3;S1PR1;SCML4;SERTAD3;STAT4;TARBP               |
| midnightb | BP | GO:0001421 | regulation of RNA metabolic process         | 17735 | 2953  | 65  | 24  | 11.78  | 2.00E-04 | 2.037351 | ATF7IP2;CAPRN2;DDX5;HNRPDL;PER3;S1PR1;SCML4;SERTAD3;STAT4;TARBP1;TRAF5;ZBTB24;ZFP28;ZMYNC               |
| midnightb | BP | GO:0034654 | nucleobase-containing compound biosynthe... | 17735 | 3583  | 65  | 27  | 14.29  | 0.00023  | 1.889433 | ATF7IP2;CAPRN2;DDX5;HNRPDL;MTERFD2;NR3C2;PER3;S1PR1;SCML4;SERTAD3;SRSF1;STAT4;TARBP1;TRAI               |
| midnightb | CC | GO:0043231 | intracellular membrane-bounded organelle    | 17735 | 9560  | 65  | 49  | 35.38  | 0.00024  | 1.384963 | ATF7IP2;CASB;CAPRN2;CAR52;CNST;DDX5;FES;GADD45B;GATC;GBGT1;GOLGA8A;HK3;HNRPDL;MRPS25;M                  |
| midnightb | CC | GO:0043229 | intracellular organelle                     | 17735 | 10522 | 65  | 52  | 38.94  | 0.00024  | 1.335388 | ATF7IP2;CASB;CAPRN2;CAR52;CNST;DDX5;FES;GADD45B;GATC;GBGT1;GOLGA8A;HAUS4;HK3;HNRPDL;MRI                 |
| midnightb | CC | GO:0043227 | membrane-bounded organelle                  | 17735 | 9590  | 65  | 49  | 35.49  | 0.00026  | 1.380671 | ATF7IP2;CASB;CAPRN2;CAR52;CNST;DDX5;FES;GADD45B;GATC;GBGT1;GOLGA8A;HK3;HNRPDL;MRPS25;M                  |
| midnightb | CC | GO:0043226 | organelle                                   | 17735 | 10522 | 65  | 52  | 39.05  | 0.00027  | 1.331626 | ATF7IP2;CASB;CAPRN2;CAR52;CNST;DDX5;FES;GADD45B;GATC;GBGT1;GOLGA8A;HAUS4;HK3;HNRPDL;MRI                 |
| midnightb | CC | GO:0005622 | intracellular                               | 17735 | 12344 | 65  | 57  | 45.68  | 0.00029  | 1.247811 | ATF7IP2;CASB;CAPRN2;CAR52;CNST;DDX5;FES;GADD45B;GATC;GBGT1;GOLGA8A;HAUS4;HK3;HNRPDL;KCT                 |
| midnightb | BP | GO:0044237 | cellular metabolic process                  | 17735 | 8597  | 65  | 47  | 34.29  | 0.00032  | 1.370662 | ADAT2;ATF7IP2;C5orf63;CASB;CAPRN2;CAR52;CNST;DDX5;FES;GADD45B;GATC;GBGT1;GGT1;HK3;HNRPDL                |
| midnightb | BP | GO:0031323 | regulation of cellular metabolic process    | 17735 | 4397  | 65  | 30  | 17.54  | 5.00E-04 | 1.710376 | ATF7IP2;CAPRN2;CNST;DDX5;GADD45B;GATC;HNRPDL;PAIP2B;PER3;PTCD3;S1PR1;SCML4;SERTAD3;STAT4                |
| midnightb | BP | GO:0046483 | heterocycle metabolic process               | 17735 | 5361  | 65  | 34  | 21.38  | 6.00E-04 | 1.590271 | ADAT2;ATF7IP2;CAPRN2;CAR52;DDX5;GATC;HNRPDL;MTERFD2;NR3C2;PER3;S1PR1;SCML4;SERTAD3;SLC11                |
| midnightb | BP | GO:0034641 | cellular nitrogen compound metabolic pro... | 17735 | 5595  | 65  | 35  | 22.32  | 6.00E-04 | 1.5681   | ADAT2;ATF7IP2;CAPRN2;CAR52;DDX5;GATC;GGT1;HNRPDL;MTERFD2;NR3C2;PER3;S1PR1;SCML4;SERTAD3                 |
| midnightb | BP | GO:0006725 | cellular aromatic compound metabolic pro... | 17735 | 5371  | 65  | 34  | 21.42  | 0.00063  | 1.587302 | ADAT2;ATF7IP2;CAPRN2;CAR52;DDX5;GATC;HNRPDL;MTERFD2;NR3C2;PER3;S1PR1;SCML4;SERTAD3;SLC11                |
| midnightb | MF | GO:0046914 | transition metal ion binding                | 17735 | 2217  | 65  | 18  | 8.21   | 0.00074  | 2.192448 | ADAT2;CASB;NR3C2;TRAF5;ZBTB24;ZFP28;ZMYND15;ZNF234;ZNF251;ZNF331;ZNF514;ZNF528;ZNF548;ZNF               |
| midnightb | MF | GO:0097159 | organic cyclic compound binding             | 17735 | 5372  | 65  | 32  | 19.9   | 0.00077  | 1.60804  | CAPRN2;CAR52;DDX5;FES;GATC;HK3;HNRPDL;MTERFD2;NR3C2;OSBPL3;PAIP2B;PTCD3;SCML4;SEPT8;SRSF                |
| midnightb | BP | GO:0006139 | nucleobase-containing compound metabolic... | 17735 | 5209  | 65  | 33  | 20.78  | 0.00083  | 1.588065 | ADAT2;ATF7IP2;CAPRN2;CAR52;DDX5;GATC;HNRPDL;MTERFD2;NR3C2;PER3;S1PR1;SCML4;SERTAD3;SRSF                 |
| midnightb | BP | GO:0080090 | regulation of primary metabolic process     | 17735 | 4337  | 65  | 29  | 17.3   | 0.00097  | 1.676301 | ATF7IP2;CAPRN2;DDX5;GADD45B;GATC;HNRPDL;PAIP2B;PER3;PTCD3;S1PR1;SCML4;SERTAD3;STAT4;TARBP               |
| midnightb | BP | GO:0009247 | glycolipid biosynthetic process             | 17735 | 51    | 65  | 3   | 0.2    | 0.00109  | 15       | GBGT1;PIGG;PIGL                                                                                         |
| midnightb | BP | GO:0006417 | regulation of translation                   | 17735 | 200   | 65  | 5   | 0.8    | 0.00119  | 6.25     | CAPRN2;GATC;PAIP2B;PTCD3;UPF3A                                                                          |
| midnightb | BP | GO:0043170 | macromolecule metabolic process             | 17735 | 7334  | 65  | 41  | 29.25  | 0.00136  | 1.401709 | ADAT2;ATF7IP2;CAPRN2;CAR52;DDX5;FES;GADD45B;GATC;GBGT1;HNRPDL;MRPS25;MTERFD2;NR3C2;PAIP                 |
| midnightb | BP | GO:0006399 | tRNA metabolic process                      | 17735 | 121   | 65  | 4   | 0.48   | 0.00137  | 8.333333 | ADAT2;CAR52;GATC;TSEN2                                                                                  |
| midnightb | BP | GO:1901360 | organic cyclic compound metabolic proces... | 17735 | 5578  | 65  | 34  | 22.25  | 0.00137  | 1.52809  | ADAT2;ATF7IP2;CAPRN2;CAR52;DDX5;GATC;HNRPDL;MTERFD2;NR3C2;PER3;S1PR1;SCML4;SERTAD3;SLC11                |
| midnightb | MF | GO:1901363 | heterocyclic compound binding               | 17735 | 5302  | 65  | 31  | 19.64  | 0.00147  | 1.578411 | CAPRN2;CAR52;DDX5;FES;GATC;HK3;HNRPDL;MTERFD2;NR3C2;PAIP2B;PTCD3;SCML4;SEPT8;SRSF1;STAT4                |
| midnightb | CC | GO:0044424 | intracellular part                          | 17735 | 12103 | 65  | 55  | 44.79  | 0.00152  | 1.227953 | ATF7IP2;CASB;CAPRN2;CAR52;CNST;DDX5;FES;GADD45B;GATC;GBGT1;GOLGA8A;HAUS4;HK3;HNRPDL;KCT                 |
| midnightb | BP | GO:0032543 | mitochondrial translation                   | 17735 | 15    | 65  | 2   | 0.06   | 0.00159  | 33.33333 | GATC;PTCD3                                                                                              |
| midnightb | BP | GO:0016254 | preassembly of GPI anchor in ER membrane    | 17735 | 16    | 65  | 2   | 0.06   | 0.00181  | 33.33333 | PIGG;PIGL                                                                                               |
| midnightb | BP | GO:0019219 | regulation of nucleobase-containing comp... | 17735 | 3414  | 65  | 24  | 13.62  | 0.00185  | 1.762115 | ATF7IP2;CAPRN2;DDX5;HNRPDL;PER3;S1PR1;SCML4;SERTAD3;STAT4;TARBP1;TRAF5;ZBTB24;ZFP28;ZMYNC               |
| midnightb | BP | GO:0006807 | nitrogen compound metabolic process         | 17735 | 5942  | 65  | 35  | 23.7   | 0.00211  | 1.476793 | ADAT2;ATF7IP2;CAPRN2;CAR52;DDX5;GATC;GGT1;HNRPDL;MTERFD2;NR3C2;PER3;S1PR1;SCML4;SERTAD3                 |
| midnightb | BP | GO:0008152 | metabolic process                           | 17735 | 9452  | 65  | 48  | 37.7   | 0.00231  | 1.27321  | ADAT2;ATF7IP2;C5orf63;CASB;CAPRN2;CAR52;CNST;DDX5;FES;GADD45B;GATC;GBGT1;GGT1;HK3;HNRPDL                |
| midnightb | BP | GO:0006412 | translation                                 | 17735 | 464   | 65  | 7   | 1.85   | 0.00237  | 3.783784 | CAPRN2;CAR52;GATC;MRPS25;PAIP2B;PTCD3;UPF3A                                                             |
| midnightb | CC | GO:0005634 | nucleus                                     | 17735 | 5873  | 65  | 33  | 21.73  | 0.0025   | 1.518638 | ATF7IP2;DDX5;GADD45B;HNRPDL;NARF;NR3C2;OFD1;OSBPL3;PER3;S100BPB;SCML4;SERTAD3;SLC11A2;SRF               |
| midnightb | BP | GO:0051171 | regulation of nitrogen compound metaboli... | 17735 | 3496  | 65  | 24  | 13.94  | 0.00259  | 1.721664 | ATF7IP2;CAPRN2;DDX5;HNRPDL;PER3;S1PR1;SCML4;SERTAD3;STAT4;TARBP1;TRAF5;ZBTB24;ZFP28;ZMYNC               |
| midnightb | BP | GO:0010608 | posttranscriptional regulation of gene e... | 17735 | 355   | 65  | 6   | 1.42   | 0.00282  | 4.225352 | CAPRN2;GATC;PAIP2B;PTCD3;TBG1;UPF3A                                                                     |
| midnightb | BP |            |                                             |       |       |     |     |        |          |          |                                                                                                         |







|            |            |                                             |       |      |     |    |       |         |          |                                                                                           |
|------------|------------|---------------------------------------------|-------|------|-----|----|-------|---------|----------|-------------------------------------------------------------------------------------------|
| magenta BP | GO:0050671 | positive regulation of lymphocyte prolif... | 17735 | 97   | 144 | 4  | 0.82  | 0.00923 | 4.878049 | CD24;CD40;ICOSLG;TNFRSF13C                                                                |
| magenta BP | GO:0032946 | positive regulation of mononuclear cell ... | 17735 | 98   | 144 | 4  | 0.83  | 0.00956 | 4.819277 | CD24;CD40;ICOSLG;TNFRSF13C                                                                |
| magenta BP | GO:0070663 | regulation of leukocyte proliferation       | 17735 | 153  | 144 | 5  | 1.29  | 0.00967 | 3.875969 | CD24;CD40;ICOSLG;PAWR;TNFRSF13C                                                           |
| magenta BP | GO:0042104 | positive regulation of activated T cell ... | 17735 | 18   | 144 | 2  | 0.15  | 0.00994 | 13.33333 | CD24;ICOSLG                                                                               |
| magenta CC | GO:0005578 | proteinaceous extracellular matrix          | 17735 | 360  | 144 | 8  | 2.97  | 0.00997 | 2.693603 | COCH;COL19A1;COL4A3;COL4A4;CTGF;LAMA5;LAMC1;MMP11                                         |
| magenta BP | GO:0070665 | positive regulation of leukocyte prolif...  | 17735 | 100  | 144 | 4  | 0.85  | 0.01025 | 4.705882 | CD24;CD40;ICOSLG;TNFRSF13C                                                                |
| magenta MF | GO:0050699 | WW domain binding                           | 17735 | 20   | 144 | 2  | 0.16  | 0.01065 | 12.5     | ENAH;PMPEA1                                                                               |
| magenta BP | GO:0045619 | regulation of lymphocyte differentiation    | 17735 | 102  | 144 | 4  | 0.86  | 0.01096 | 4.651163 | CD83;DTX1;HLA-DOA;IRF4                                                                    |
| magenta BP | GO:0007411 | axon guidance                               | 17735 | 358  | 144 | 8  | 3.03  | 0.01109 | 2.640264 | CD24;CD72;COL4A3;COL4A4;ENAH;FARP2;L1CAM;LAMC1                                            |
| magenta BP | GO:0030217 | T cell differentiation                      | 17735 | 160  | 144 | 5  | 1.35  | 0.01158 | 3.703704 | BCL11A;CD83;DTX1;HLA-DOA;IRF4                                                             |
| magenta BP | GO:0007409 | axonogenesis                                | 17735 | 515  | 144 | 10 | 4.36  | 0.01202 | 2.293578 | BCL11A;CD24;CD72;COL4A3;COL4A4;ENAH;FARP2;L1CAM;LAMC1;MAP2                                |
| magenta MF | GO:0019887 | protein kinase regulator activity           | 17735 | 113  | 144 | 4  | 0.89  | 0.01218 | 4.494382 | CABYR;CD24;GHR1;PKIG                                                                      |
| magenta BP | GO:0032501 | multicellular organismal process            | 17735 | 5593 | 144 | 60 | 47.31 | 0.01233 | 1.268231 | ADAM28;ADD2;AFF3;BCL11A;BLNK;CABYR;CD24;CD40;CD72;CD79A;CD83;CELSR1;CNR2;CNTNAP2;COCH;CC  |
| magenta MF | GO:0005085 | guanyl-nucleotide exchange factor activi... | 17735 | 176  | 144 | 5  | 1.39  | 0.01273 | 3.597122 | DENND5B;FARP2;PLEKHG1;RAPGEF5;RASGRP3                                                     |
| magenta BP | GO:0042129 | regulation of T cell proliferation          | 17735 | 107  | 144 | 4  | 0.91  | 0.01289 | 4.395604 | CD24;ICOSLG;PAWR;TNFRSF13C                                                                |
| magenta BP | GO:0007275 | multicellular organismal development        | 17735 | 3940 | 144 | 45 | 33.33 | 0.0131  | 1.350135 | ADD2;AFF3;BCL11A;BLNK;CD24;CD40;CD72;CD79A;CD83;CELSR1;CNTNAP2;COL19A1;COL4A3;COL4A4;CTGF |
| magenta BP | GO:0007044 | cell-substrate junction assembly            | 17735 | 59   | 144 | 3  | 0.5   | 0.01361 | 6        | LAMA5;LAMC1;PTPRK                                                                         |
| magenta BP | GO:0042108 | positive regulation of cytokine biosynth... | 17735 | 59   | 144 | 3  | 0.5   | 0.01361 | 6        | ICOSLG;IRF4;TNFRSF13C                                                                     |
| magenta BP | GO:0031175 | neuron projection development               | 17735 | 689  | 144 | 12 | 5.83  | 0.01376 | 2.058319 | BCL11A;CD24;CD72;CNTNAP2;COL4A3;COL4A4;ENAH;FARP2;GHR1;L1CAM;LAMC1;MAP2                   |
| magenta BP | GO:0044707 | single-multicellular organism process       | 17735 | 5398 | 144 | 58 | 45.66 | 0.01409 | 1.270258 | ADD2;AFF3;BCL11A;BLNK;CD24;CD40;CD72;CD79A;CD83;CELSR1;CNR2;CNTNAP2;COCH;COL19A1;COL4A3;C |
| magenta CC | GO:0010008 | endosome membrane                           | 17735 | 311  | 144 | 7  | 2.56  | 0.01461 | 2.734375 | GGA2;HLA-DOA;HLA-DOB;MARCH3;PARM1;PMPEA1;SLC9A7                                           |
| magenta BP | GO:0042094 | interleukin-2 biosynthetic process          | 17735 | 22   | 144 | 2  | 0.19  | 0.01468 | 10.52632 | IRF4;PAWR                                                                                 |
| magenta MF | GO:0035591 | signaling adaptor activity                  | 17735 | 66   | 144 | 3  | 0.52  | 0.01519 | 5.769231 | BLNK;FCRL2;STAP1                                                                          |
| magenta BP | GO:0002757 | immune response-activating signal transd... | 17735 | 237  | 144 | 6  | 2     | 0.01541 | 3        | BLK;CD79A;CD79B;ENAH;IRF4;PAWR                                                            |
| magenta CC | GO:0044420 | extracellular matrix part                   | 17735 | 177  | 144 | 5  | 1.46  | 0.01563 | 3.424658 | COL19A1;COL4A3;COL4A4;LAMA5;LAMC1                                                         |
| magenta BP | GO:0050896 | response to stimulus                        | 17735 | 6581 | 144 | 68 | 55.67 | 0.01588 | 1.221484 | ADARB1;AFF3;BLK;BLNK;CABYR;CCR6;CD180;CD19;CD200;CD24;CD40;CD72;CD79A;CD79B;CD83;CE       |
| magenta BP | GO:0050867 | positive regulation of cell activation      | 17735 | 239  | 144 | 6  | 2.02  | 0.01599 | 2.970297 | CD24;CD40;CD83;CTGF;ICOSLG;TNFRSF13C                                                      |
| magenta BP | GO:0002253 | activation of immune response               | 17735 | 310  | 144 | 7  | 2.62  | 0.01626 | 2.671756 | BLK;CD79A;CD79B;CR2;ENAH;IRF4;PAWR                                                        |
| magenta MF | GO:0001637 | G-protein coupled chemoattractant recept... | 17735 | 25   | 144 | 2  | 0.2   | 0.01638 | 10       | CCR6;CXCR5                                                                                |
| magenta MF | GO:0004950 | chemokine receptor activity                 | 17735 | 25   | 144 | 2  | 0.2   | 0.01638 | 10       | CCR6;CXCR5                                                                                |
| magenta BP | GO:0007399 | nervous system development                  | 17735 | 1716 | 144 | 23 | 14.52 | 0.01662 | 1.584022 | BCL11A;CD24;CD72;CELSR1;CNTNAP2;COL4A3;COL4A4;DPF3;DTX1;EGR3;ENAH;FARP2;GHR1;KCNIP2;L1CAM |
| magenta BP | GO:0048666 | neuron development                          | 17735 | 793  | 144 | 13 | 6.71  | 0.01663 | 1.937407 | BCL11A;CD24;CD72;CNTNAP2;COL4A3;COL4A4;ENAH;FARP2;GHR1;KCNIP2;L1CAM;LAMC1;MAP2            |
| magenta CC | GO:0044440 | endosomal part                              | 17735 | 320  | 144 | 7  | 2.64  | 0.01683 | 2.651515 | GGA2;HLA-DOA;HLA-DOB;MARCH3;PARM1;PMPEA1;SLC9A7                                           |
| magenta BP | GO:0016064 | immunoglobulin mediated immune response     | 17735 | 116  | 144 | 4  | 0.98  | 0.01689 | 4.081633 | CD40;CR2;FCER2;SWAP70                                                                     |
| magenta BP | GO:0048469 | cell maturation                             | 17735 | 116  | 144 | 4  | 0.98  | 0.01689 | 4.081633 | CABYR;CNTNAP2;FARP2;KCNIP2                                                                |
| magenta BP | GO:0048699 | generation of neurons                       | 17735 | 1061 | 144 | 16 | 8.97  | 0.01699 | 1.783724 | BCL11A;CD24;CD72;CELSR1;CNTNAP2;COL4A3;COL4A4;DTX1;ENAH;FARP2;GHR1;KCNIP2;L1CAM;LAMC1;M   |
| magenta MF | GO:0015079 | potassium ion transmembrane transporter ... | 17735 | 125  | 144 | 4  | 0.98  | 0.01707 | 4.081633 | KCNH8;KCNIP2;SLC9A7                                                                       |
| magenta BP | GO:0050850 | positive regulation of calcium-mediated ... | 17735 | 24   | 144 | 2  | 0.2   | 0.01735 | 10       | L1CAM;P2RX5                                                                               |
| magenta BP | GO:0007154 | cell communication                          | 17735 | 4775 | 144 | 52 | 40.39 | 0.01743 | 1.287447 | BLK;BLNK;CABYR;CCR6;CD19;CD24;CD40;CD79A;CD79B;CD83;CELSR1;CNR2;CNTNAP2;COL4A3;CTGF;CXCR5 |
| magenta BP | GO:0023052 | signaling                                   | 17735 | 4666 | 144 | 51 | 39.47 | 0.0176  | 1.292121 | BLK;BLNK;CABYR;CCR6;CD19;CD24;CD40;CD79A;CD79B;CD83;CELSR1;CNR2;CNTNAP2;COL4A3;CTGF;CXCR5 |
| magenta BP | GO:0044700 | single organism signaling                   | 17735 | 4666 | 144 | 51 | 39.47 | 0.0176  | 1.292121 | BLK;BLNK;CABYR;CCR6;CD19;CD24;CD40;CD79A;CD79B;CD83;CELSR1;CNR2;CNTNAP2;COL4A3;CTGF;CXCR5 |
| magenta BP | GO:0030182 | neuron differentiation                      | 17735 | 977  | 144 | 15 | 8.26  | 0.01785 | 1.815981 | BCL11A;CD24;CD72;CNTNAP2;COL4A3;COL4A4;DTX1;ENAH;FARP2;GHR1;KCNIP2;L1CAM;LAMC1;MAP2;TCF   |
| magenta BP | GO:0048856 | anatomical structure development            | 17735 | 3903 | 144 | 44 | 33.01 | 0.01804 | 1.332929 | ADD2;AFF3;BCL11A;BLNK;CABYR;CD24;CD40;CD72;CD79A;CD83;CELSR1;CNTNAP2;COCH;COL19A1;COL4A3  |
| magenta BP | GO:0019724 | B cell mediated immunity                    | 17735 | 119  | 144 | 4  | 1.01  | 0.01837 | 3.960396 | CD40;CR2;FCER2;SWAP70                                                                     |
| magenta BP | GO:0046006 | regulation of activated T cell prolifera... | 17735 | 25   | 144 | 2  | 0.21  | 0.01875 | 9.52381  | CD24;ICOSLG                                                                               |
| magenta MF | GO:0022843 | voltage-gated cation channel activity       | 17735 | 129  | 144 | 4  | 1.02  | 0.01894 | 3.921569 | KCNH8;KCNIP2;SCN4A                                                                        |
| magenta CC | GO:0008076 | voltage-gated potassium channel complex     | 17735 | 69   | 144 | 3  | 0.57  | 0.0193  | 5.263158 | CNTNAP2;KCNH8;KCNIP2                                                                      |
| magenta CC | GO:0034705 | potassium channel complex                   | 17735 | 69   | 144 | 3  | 0.57  | 0.0193  | 5.263158 | CNTNAP2;KCNH8;KCNIP2                                                                      |
| magenta MF | GO:0005261 | cation channel activity                     | 17735 | 268  | 144 | 6  | 2.11  | 0.01932 | 2.843602 | HTR3A;KCNH8;KCNIP2;P2RX5;SCN4A                                                            |
| magenta MF | GO:0030674 | protein binding, bridging                   | 17735 | 130  | 144 | 4  | 1.02  | 0.01942 | 3.921569 | BLNK;COL19A1;FCRL2;STAP1                                                                  |
| magenta BP | GO:0048731 | system development                          | 17735 | 3385 | 144 | 39 | 28.63 | 0.01972 | 1.362207 | ADD2;BCL11A;BLNK;CD24;CD40;CD72;CD79A;CD83;CELSR1;CNTNAP2;COL19A1;COL4A3;COL4A4;CTGF;CXCF |
| magenta BP | GO:0061098 | positive regulation of protein tyrosine ... | 17735 | 26   | 144 | 2  | 0.22  | 0.0202  | 9.090909 | CD24;GHR1                                                                                 |
| magenta CC | GO:0043025 | neuronal cell body                          | 17735 | 259  | 144 | 6  | 2.13  | 0.02041 | 2.816901 | CNR2;CNTNAP2;KLHL14;MAP2;PTPRK;SYNPO                                                      |
| magenta BP | GO:0042102 | positive regulation of T cell proliferat... | 17735 | 69   | 144 | 3  | 0.58  | 0.02065 | 5.172414 | CD24;ICOSLG;TNFRSF13C                                                                     |
| magenta MF | GO:0019207 | kinase regulator activity                   | 17735 | 133  | 144 | 4  | 1.05  | 0.02093 | 3.809524 | CABYR;CD24;GHR1;PKIG                                                                      |
| magenta BP | GO:0048667 | cell morphogenesis involved in neuron di... | 17735 | 563  | 144 | 10 | 4.76  | 0.02108 | 2.10084  | BCL11A;CD24;CD72;COL4A3;COL4A4;ENAH;FARP2;L1CAM;LAMC1;MAP2                                |
| magenta BP | GO:0002521 | leukocyte differentiation                   | 17735 | 329  | 144 | 7  | 2.78  | 0.02175 | 2.517986 | BCL11A;BLNK;CD79A;CD83;DTX1;HLA-DOA;IRF4                                                  |
| magenta BP | GO:0030154 | cell differentiation                        | 17735 | 2673 | 144 | 32 | 22.61 | 0.02214 | 1.415303 | BCL11A;BLNK;CABYR;CD24;CD72;CD79A;CD83;CELSR1;CNTNAP2;COL19A1;COL4A3;COL4A4;CTGF;DTX1;ENH |
| magenta BP | GO:0008154 | actin polymerization or depolymerization    | 17735 | 126  | 144 | 4  | 1.07  | 0.02215 | 3.738318 | ADD2;ENAH;GHR1;MICAL3                                                                     |
| magenta BP | GO:0048812 | neuron projection morphogenesis             | 17735 | 568  | 144 | 10 | 4.8   | 0.02225 | 2.083333 | BCL11A;CD24;CD72;COL4A3;COL4A4;ENAH;FARP2;L1CAM;LAMC1;MAP2                                |
| magenta CC | GO:0034702 | ion channel complex                         | 17735 | 194  | 144 | 5  | 1.6   | 0.02227 | 3.125    | AKAP6;CNTNAP2;KCNH8;KCNIP2;SCN4A                                                          |
| magenta BP | GO:0031295 | T cell costimulation                        | 17735 | 72   | 144 | 3  | 0.61  | 0.02308 | 4.918033 | CD24;ICOSLG;TNFRSF13C                                                                     |
| magenta BP | GO:0043370 | regulation of CD4-positive, alpha-beta T... | 17735 | 28   | 144 | 2  | 0.24  | 0.02324 | 8.333333 | CD83;IRF4                                                                                 |
| magenta MF | GO:0005249 | voltage-gated potassium channel activity    | 17735 | 78   | 144 | 3  | 0.61  | 0.02361 | 4.918033 | KCNH8;KCNIP2                                                                              |
| magenta BP | GO:0044767 | single-organism developmental process       | 17735 | 3427 | 144 | 39 | 28.99 | 0.02381 | 1.345291 | ADD2;AFF3;BCL11A;BLNK;CABYR;CD24;CD72;CD79A;CD83;CELSR1;CNTNAP2;COCH;COL19A1;COL4A3;COL4  |
| magenta BP | GO:0031294 | lymphocyte costimulation                    | 17735 | 73   | 144 | 3  | 0.62  | 0.02392 | 4.83871  | CD24;ICOSLG;TNFRSF13C                                                                     |
| magenta BP | GO:0001843 | neural tube closure                         | 17735 | 74   | 144 | 3  | 0.63  | 0.02478 | 4.761905 | CELSR1;ENAH;PRICKLE1                                                                      |
| magenta BP | GO:0044708 | single-organism behavior                    | 17735 | 340  | 144 | 7  | 2.88  | 0.02545 | 2.430556 | CELSR1;CNTNAP2;GHR1;GNG7;NETO1;SOBP;STRBP                                                 |
| magenta BP | GO:0060606 | tube closure                                | 17735 | 75   | 144 | 3  | 0.63  | 0.02566 | 4.761905 | CELSR1;ENAH;PRICKLE1                                                                      |

|            |            |                                             |       |      |     |    |       |         |          |                                                                                             |
|------------|------------|---------------------------------------------|-------|------|-----|----|-------|---------|----------|---------------------------------------------------------------------------------------------|
| magenta MF | GO:0060090 | binding, bridging                           | 17735 | 142  | 144 | 4  | 1.12  | 0.02586 | 3.571429 | BLNK;COL19A1;FCRL2;STAP1                                                                    |
| magenta BP | GO:0042098 | T cell proliferation                        | 17735 | 133  | 144 | 4  | 1.13  | 0.02636 | 3.539823 | CD24;ICOSLG;PAWR;TNFRSF13C                                                                  |
| magenta BP | GO:2000514 | regulation of CD4-positive, alpha-beta T... | 17735 | 30   | 144 | 2  | 0.25  | 0.02646 | 8        | CD83;IRF4                                                                                   |
| magenta BP | GO:0032502 | developmental process                       | 17735 | 4437 | 144 | 48 | 37.53 | 0.02679 | 1.278977 | ADD2;AFF3;BCL11A;BLNK;CABYR;CD24;CD40;CD72;CD79A;CD83;CELSR1;CNTNAP2;COCH;COL19A1;COL4A3;   |
| magenta BP | GO:0048858 | cell projection morphogenesis               | 17735 | 673  | 144 | 11 | 5.69  | 0.02731 | 1.933216 | BCL11A;CD24;CD72;COL4A3;COL4A4;ENAH;FARP2;L1CAM;LAMA5;LAMC1;MAP2                            |
| magenta BP | GO:0030183 | B cell differentiation                      | 17735 | 77   | 144 | 3  | 0.65  | 0.02746 | 4.615385 | BCL11A;BLNK;CD79A                                                                           |
| magenta BP | GO:0022008 | neurogenesis                                | 17735 | 1126 | 144 | 16 | 9.52  | 0.02785 | 1.680672 | BCL11A;CD24;CD72;CELSR1;CNTNAP2;COL4A3;COL4A4;DTX1;ENAH;FARP2;GHRL;KCNIP2;L1CAM;LAMC1;M/    |
| magenta BP | GO:0032233 | positive regulation of actin filament bu... | 17735 | 31   | 144 | 2  | 0.26  | 0.02813 | 7.692308 | CTGF;SYNPO                                                                                  |
| magenta BP | GO:0050798 | activated T cell proliferation              | 17735 | 31   | 144 | 2  | 0.26  | 0.02813 | 7.692308 | CD24;ICOSLG                                                                                 |
| magenta BP | GO:0014020 | primary neural tube formation               | 17735 | 79   | 144 | 3  | 0.67  | 0.02933 | 4.477612 | CELSR1;ENAH;PRICKLE1                                                                        |
| magenta BP | GO:0001816 | cytokine production                         | 17735 | 430  | 144 | 8  | 3.64  | 0.0296  | 2.197802 | CD24;CD40;CD83;GHRL;ICOSLG;IRF4;PAWR;TNFRSF13C                                              |
| magenta BP | GO:0007156 | homophilic cell adhesion                    | 17735 | 138  | 144 | 4  | 1.17  | 0.02965 | 3.418803 | CDHR3;CELSR1;L1CAM;PCDH9                                                                    |
| magenta BP | GO:0006935 | chemotaxis                                  | 17735 | 596  | 144 | 10 | 5.04  | 0.02971 | 1.984127 | CCR6;CD24;CD72;COL4A3;COL4A4;EGR3;ENAH;FARP2;L1CAM;LAMC1                                    |
| magenta BP | GO:0042330 | taxis                                       | 17735 | 596  | 144 | 10 | 5.04  | 0.02971 | 1.984127 | CCR6;CD24;CD72;COL4A3;COL4A4;EGR3;ENAH;FARP2;L1CAM;LAMC1                                    |
| magenta BP | GO:0002889 | regulation of immunoglobulin mediated im... | 17735 | 32   | 144 | 2  | 0.27  | 0.02984 | 7.407407 | CD40;FCER2                                                                                  |
| magenta BP | GO:0032653 | regulation of interleukin-10 production     | 17735 | 32   | 144 | 2  | 0.27  | 0.02984 | 7.407407 | CD83;IRF4                                                                                   |
| magenta BP | GO:0048869 | cellular developmental process              | 17735 | 2842 | 144 | 33 | 24.04 | 0.03008 | 1.372712 | BCL11A;BLNK;CABYR;CD24;CD72;CD79A;CD83;CELSR1;CNTNAP2;COCH;COL19A1;COL4A3;COL4A4;CTGF;DT/   |
| magenta BP | GO:0032990 | cell part morphogenesis                     | 17735 | 685  | 144 | 11 | 5.79  | 0.03053 | 1.899827 | BCL11A;CD24;CD72;COL4A3;COL4A4;ENAH;FARP2;L1CAM;LAMA5;LAMC1;MAP2                            |
| magenta BP | GO:0016331 | morphogenesis of embryonic epithelium       | 17735 | 140  | 144 | 4  | 1.18  | 0.03103 | 3.389831 | CELSR1;ENAH;LAMA5;PRICKLE1                                                                  |
| magenta CC | GO:0044297 | cell body                                   | 17735 | 286  | 144 | 6  | 2.36  | 0.03117 | 2.542373 | CNR2;CNTNAP2;KLHL14;MAP2;PTPRK;SYNPO                                                        |
| magenta BP | GO:0002712 | regulation of B cell mediated immunity      | 17735 | 33   | 144 | 2  | 0.28  | 0.03159 | 7.142857 | CD40;FCER2                                                                                  |
| magenta MF | GO:0022836 | gated channel activity                      | 17735 | 301  | 144 | 6  | 2.37  | 0.03176 | 2.531646 | HTR3A;KCNK1;KCNH8;KCNIP2;P2RX5;SCN4A                                                        |
| magenta MF | GO:0022839 | ion gated channel activity                  | 17735 | 301  | 144 | 6  | 2.37  | 0.03176 | 2.531646 | HTR3A;KCNK1;KCNH8;KCNIP2;P2RX5;SCN4A                                                        |
| magenta BP | GO:0002822 | regulation of adaptive immune response b... | 17735 | 83   | 144 | 3  | 0.7   | 0.03327 | 4.285714 | CD40;FCER2;TNFRSF13C                                                                        |
| magenta BP | GO:0050864 | regulation of B cell activation             | 17735 | 83   | 144 | 3  | 0.7   | 0.03327 | 4.285714 | CD40;PAWR;TNFRSF13C                                                                         |
| magenta BP | GO:0002204 | somatic recombination of immunoglobulin ... | 17735 | 34   | 144 | 2  | 0.29  | 0.03338 | 6.896552 | CD40;SWAP70                                                                                 |
| magenta BP | GO:0002208 | somatic diversification of immunoglobuli... | 17735 | 34   | 144 | 2  | 0.29  | 0.03338 | 6.896552 | CD40;SWAP70                                                                                 |
| magenta BP | GO:0032613 | interleukin-10 production                   | 17735 | 34   | 144 | 2  | 0.29  | 0.03338 | 6.896552 | CD83;IRF4                                                                                   |
| magenta BP | GO:0034446 | substrate adhesion-dependent cell spread... | 17735 | 34   | 144 | 2  | 0.29  | 0.03338 | 6.896552 | LAMA5;LAMC1                                                                                 |
| magenta BP | GO:0045190 | isotype switching                           | 17735 | 34   | 144 | 2  | 0.29  | 0.03338 | 6.896552 | CD40;SWAP70                                                                                 |
| magenta BP | GO:0050848 | regulation of calcium-mediated signaling    | 17735 | 34   | 144 | 2  | 0.29  | 0.03338 | 6.896552 | L1CAM;P2RX5                                                                                 |
| magenta BP | GO:0051251 | positive regulation of lymphocyte activa... | 17735 | 211  | 144 | 5  | 1.78  | 0.03352 | 2.808989 | CD24;CD40;CD83;ICOSLG;TNFRSF13C                                                             |
| magenta BP | GO:0007165 | signal transduction                         | 17735 | 4165 | 144 | 45 | 35.23 | 0.03382 | 1.27732  | BLK;BLNK;CABYR;CCR6;CD19;CD24;CD40;CD79A;CD79B;CD83;CELSR1;CNR2;CNTNAP2;COL4A3;CTGF;CXCR5   |
| magenta BP | GO:0048583 | regulation of response to stimulus          | 17735 | 2347 | 144 | 28 | 19.85 | 0.03403 | 1.410579 | BLK;CD19;CD200;CD24;CD40;CD79A;CD79B;CNR2;CR2;CTGF;DTX1;ENAH;FARP2;FCER2;GHRL;GNG7;IRF4;L1/ |
| magenta BP | GO:0000904 | cell morphogenesis involved in different... | 17735 | 699  | 144 | 11 | 5.91  | 0.03463 | 1.861252 | BCL11A;CD24;CD72;COL4A3;COL4A4;ENAH;FARP2;L1CAM;LAMA5;LAMC1;MAP2                            |
| magenta MF | GO:0008324 | cation transmembrane transporter activit... | 17735 | 566  | 144 | 9  | 4.46  | 0.03467 | 2.017937 | HTR3A;KCNK1;KCNH8;KCNIP2;NIPAL4;P2RX5;SCN4A;SLC15A2;SLC9A7                                  |
| magenta BP | GO:0040011 | locomotion                                  | 17735 | 1253 | 144 | 17 | 10.6  | 0.03478 | 1.603774 | ADARB1;CABYR;CCR6;CD24;CD72;CELSR1;COL4A3;COL4A4;CTGF;EGR3;ENAH;FARP2;GHRL;L1CAM;LAMA5;L    |
| magenta CC | GO:0005581 | collagen                                    | 17735 | 87   | 144 | 3  | 0.72  | 0.03511 | 4.166667 | COL19A1;COL4A3;COL4A4                                                                       |
| magenta BP | GO:0030890 | positive regulation of B cell proliferat... | 17735 | 35   | 144 | 2  | 0.3   | 0.03521 | 6.666667 | CD40;TNFRSF13C                                                                              |
| magenta BP | GO:0050999 | regulation of nitric-oxide synthase acti... | 17735 | 35   | 144 | 2  | 0.3   | 0.03521 | 6.666667 | CNR2;FCER2                                                                                  |
| magenta BP | GO:0090288 | negative regulation of cellular response... | 17735 | 86   | 144 | 3  | 0.73  | 0.0364  | 4.109589 | PEG10;PMEPA1;SPRY1                                                                          |
| magenta CC | GO:0005768 | endosome                                    | 17735 | 546  | 144 | 9  | 4.5   | 0.03684 | 2        | CD79A;CNTNAP2;GGA2;HLA-DOA;HLA-DOB;MARCH3;PARM1;PMEPA1;SLC9A7                               |
| magenta MF | GO:0005543 | phospholipid binding                        | 17735 | 487  | 144 | 8  | 3.83  | 0.03855 | 2.088773 | FAM129C;FARP2;OSBPL10;PIK3C2B;PLEKHG1;SNX22;STAP1;SWAP70                                    |
| magenta BP | GO:0002285 | lymphocyte activation involved in immune... | 17735 | 88   | 144 | 3  | 0.74  | 0.03856 | 4.054054 | CD40;IRF4;SWAP70                                                                            |
| magenta BP | GO:0022617 | extracellular matrix disassembly            | 17735 | 37   | 144 | 2  | 0.31  | 0.03899 | 6.451613 | LAMC1;MMP11                                                                                 |
| magenta BP | GO:0030042 | actin filament depolymerization             | 17735 | 37   | 144 | 2  | 0.31  | 0.03899 | 6.451613 | ADD2;MICAL3                                                                                 |
| magenta CC | GO:0042611 | MHC protein complex                         | 17735 | 38   | 144 | 2  | 0.31  | 0.03904 | 6.451613 | HLA-DOA;HLA-DOB                                                                             |
| magenta MF | GO:0030295 | protein kinase activator activity           | 17735 | 40   | 144 | 2  | 0.31  | 0.03947 | 6.451613 | CD24;GHRL                                                                                   |
| magenta BP | GO:0007218 | neuropeptide signaling pathway              | 17735 | 89   | 144 | 3  | 0.75  | 0.03967 | 4        | CELSR1;NXPH4;PNOG                                                                           |
| magenta BP | GO:0072006 | nephron development                         | 17735 | 89   | 144 | 3  | 0.75  | 0.03967 | 4        | CD24;COL4A3;COL4A4                                                                          |
| magenta BP | GO:0048534 | hematopoietic or lymphoid organ developm... | 17735 | 542  | 144 | 9  | 4.58  | 0.04045 | 1.965066 | ADD2;BCL11A;BLNK;CD79A;CD83;CXCR5;DTX1;HLA-DOA;IRF4                                         |
| magenta BP | GO:0002819 | regulation of adaptive immune response      | 17735 | 91   | 144 | 3  | 0.77  | 0.04193 | 3.896104 | CD40;FCER2;TNFRSF13C                                                                        |
| magenta BP | GO:0051492 | regulation of stress fiber assembly         | 17735 | 39   | 144 | 2  | 0.33  | 0.04291 | 6.060606 | CTGF;SYNPO                                                                                  |
| magenta BP | GO:0048468 | cell development                            | 17735 | 1482 | 144 | 19 | 12.54 | 0.04299 | 1.515152 | BCL11A;CABYR;CD24;CD72;CNTNAP2;COL4A3;COL4A4;DTX1;ENAH;FARP2;GHRL;KCNIP2;L1CAM;LAMA5;LAM    |
| magenta BP | GO:0001841 | neural tube formation                       | 17735 | 92   | 144 | 3  | 0.78  | 0.04308 | 3.846154 | CELSR1;ENAH;PRICKLE1                                                                        |
| magenta BP | GO:0001817 | regulation of cytokine production           | 17735 | 382  | 144 | 7  | 3.23  | 0.04354 | 2.167183 | CD24;CD40;CD83;GHRL;ICOSLG;IRF4;TNFRSF13C                                                   |
| magenta CC | GO:0001725 | stress fiber                                | 17735 | 41   | 144 | 2  | 0.34  | 0.04482 | 5.882353 | ENAH;SYNPO                                                                                  |
| magenta BP | GO:0016447 | somatic recombination of immunoglobulin ... | 17735 | 40   | 144 | 2  | 0.34  | 0.04493 | 5.882353 | CD40;SWAP70                                                                                 |
| magenta BP | GO:0032663 | regulation of interleukin-2 production      | 17735 | 40   | 144 | 2  | 0.34  | 0.04493 | 5.882353 | CD83;IRF4                                                                                   |
| magenta MF | GO:0003725 | double-stranded RNA binding                 | 17735 | 43   | 144 | 2  | 0.34  | 0.04501 | 5.882353 | ADARB1;STRBP                                                                                |
| magenta BP | GO:0002696 | positive regulation of leukocyte activat... | 17735 | 229  | 144 | 5  | 1.94  | 0.04504 | 2.57732  | CD24;CD40;CD83;ICOSLG;TNFRSF13C                                                             |
| magenta BP | GO:0001738 | morphogenesis of a polarized epithelium     | 17735 | 41   | 144 | 2  | 0.35  | 0.04697 | 5.714286 | CELSR1;LAMA5                                                                                |
| magenta BP | GO:0046637 | regulation of alpha-beta T cell differen... | 17735 | 41   | 144 | 2  | 0.35  | 0.04697 | 5.714286 | CD83;IRF4                                                                                   |
| magenta BP | GO:0019226 | transmission of nerve impulse               | 17735 | 738  | 144 | 11 | 6.24  | 0.04807 | 1.762821 | CNR2;CNTNAP2;EGR3;GHRL;GNG7;HTR3A;KCNK1;KCNH8;KCNIP2;NETO1;PNOG                             |
| magenta CC | GO:0005788 | endoplasmic reticulum lumen                 | 17735 | 166  | 144 | 4  | 1.37  | 0.0485  | 2.919708 | COL19A1;COL4A3;COL4A4;GHRL                                                                  |
| magenta BP | GO:2000026 | regulation of multicellular organismal d... | 17735 | 1113 | 144 | 15 | 9.41  | 0.04855 | 1.594049 | BCL11A;CD24;CD40;CD83;CELSR1;COL4A3;CTGF;DTX1;GHRL;HLA-DOA;IRF4;LAMA5;PRICKLE1;SPRY1;TCF4   |
| magenta BP | GO:0002312 | B cell activation involved in immune res... | 17735 | 42   | 144 | 2  | 0.36  | 0.04906 | 5.555556 | CD40;SWAP70                                                                                 |
| magenta BP | GO:0007268 | synaptic transmission                       | 17735 | 651  | 144 | 10 | 5.51  | 0.04925 | 1.814882 | CNR2;EGR3;GHRL;GNG7;HTR3A;KCNK1;KCNH8;KCNIP2;NETO1;PNOG                                     |
| magenta BP | GO:0030030 | cell projection organization                | 17735 | 926  | 144 | 13 | 7.83  | 0.04938 | 1.660281 | BCL11A;CD24;CD72;CNTNAP2;COL4A3;COL4A4;ENAH;FARP2;GHRL;L1CAM;LAMA5;LAMC1;MAP2               |

|                |            |                                             |       |      |     |    |      |          |          |                                                              |
|----------------|------------|---------------------------------------------|-------|------|-----|----|------|----------|----------|--------------------------------------------------------------|
| magenta MF     | GO:0005244 | voltage-gated ion channel activity          | 17735 | 175  | 144 | 4  | 1.38 | 0.04951  | 2.898551 | KCNG1;KCNH8;KCNIP2;SCN4A                                     |
| magenta MF     | GO:0022832 | voltage-gated channel activity              | 17735 | 175  | 144 | 4  | 1.38 | 0.04951  | 2.898551 | KCNG1;KCNH8;KCNIP2;SCN4A                                     |
| lightyellow BP | GO:0018958 | phenol-containing compound metabolic pro... | 17735 | 65   | 27  | 3  | 0.09 | 0.00011  | 33.33333 | CYP11A1;EPAS1;HDC                                            |
| lightyellow BP | GO:0030902 | hindbrain development                       | 17735 | 115  | 27  | 3  | 0.17 | 0.00058  | 17.64706 | CTNNA2;CYP11A1;GATA2                                         |
| lightyellow BP | GO:0001568 | blood vessel development                    | 17735 | 498  | 27  | 5  | 0.72 | 6.00E-04 | 6.944444 | EPAS1;GATA2;ITGB8;NTRK1;THSD7A                               |
| lightyellow BP | GO:0001944 | vasculature development                     | 17735 | 523  | 27  | 5  | 0.76 | 0.00074  | 6.578947 | EPAS1;GATA2;ITGB8;NTRK1;THSD7A                               |
| lightyellow BP | GO:0001890 | placenta development                        | 17735 | 132  | 27  | 3  | 0.19 | 0.00086  | 15.78947 | EPAS1;GATA2;ITGB8                                            |
| lightyellow BP | GO:0048871 | multicellular organismal homeostasis        | 17735 | 155  | 27  | 3  | 0.22 | 0.00137  | 13.63636 | EPAS1;GATA2;PTGER3                                           |
| lightyellow BP | GO:0006584 | catecholamine metabolic process             | 17735 | 41   | 27  | 2  | 0.06 | 0.00157  | 33.33333 | EPAS1;HDC                                                    |
| lightyellow BP | GO:0009712 | catechol-containing compound metabolic p... | 17735 | 41   | 27  | 2  | 0.06 | 0.00157  | 33.33333 | EPAS1;HDC                                                    |
| lightyellow BP | GO:0001525 | angiogenesis                                | 17735 | 362  | 27  | 4  | 0.52 | 0.00162  | 7.692308 | EPAS1;GATA2;NTRK1;THSD7A                                     |
| lightyellow BP | GO:0034311 | diol metabolic process                      | 17735 | 42   | 27  | 2  | 0.06 | 0.00165  | 33.33333 | EPAS1;HDC                                                    |
| lightyellow BP | GO:0007202 | activation of phospholipase C activity      | 17735 | 56   | 27  | 2  | 0.08 | 0.00292  | 25       | MS4A2;NTRK1                                                  |
| lightyellow BP | GO:0048514 | blood vessel morphogenesis                  | 17735 | 438  | 27  | 4  | 0.63 | 0.00323  | 6.349206 | EPAS1;GATA2;NTRK1;THSD7A                                     |
| lightyellow BP | GO:0030816 | positive regulation of cAMP metabolic pr... | 17735 | 60   | 27  | 2  | 0.09 | 0.00334  | 22.22222 | AKAP12;NTRK1                                                 |
| lightyellow BP | GO:0030819 | positive regulation of cAMP biosynthetic... | 17735 | 60   | 27  | 2  | 0.09 | 0.00334  | 22.22222 | AKAP12;NTRK1                                                 |
| lightyellow MF | GO:0004527 | exonuclease activity                        | 17735 | 60   | 27  | 2  | 0.09 | 0.0034   | 22.22222 | ENPP3;LOC81691                                               |
| lightyellow BP | GO:0010863 | positive regulation of phospholipase C a... | 17735 | 62   | 27  | 2  | 0.09 | 0.00357  | 22.22222 | MS4A2;NTRK1                                                  |
| lightyellow BP | GO:1900274 | regulation of phospholipase C activity      | 17735 | 63   | 27  | 2  | 0.09 | 0.00368  | 22.22222 | MS4A2;NTRK1                                                  |
| lightyellow BP | GO:0044283 | small molecule biosynthetic process         | 17735 | 456  | 27  | 4  | 0.66 | 0.00374  | 6.060606 | CYP11A1;HDC;HPGDS;SLC27A2                                    |
| lightyellow BP | GO:0072358 | cardiovascular system development           | 17735 | 768  | 27  | 5  | 1.11 | 0.00407  | 4.504505 | EPAS1;GATA2;ITGB8;NTRK1;THSD7A                               |
| lightyellow BP | GO:0072359 | circulatory system development              | 17735 | 768  | 27  | 5  | 1.11 | 0.00407  | 4.504505 | EPAS1;GATA2;ITGB8;NTRK1;THSD7A                               |
| lightyellow BP | GO:0044711 | single-organism biosynthetic process        | 17735 | 468  | 27  | 4  | 0.68 | 0.0041   | 5.882353 | CYP11A1;HDC;HPGDS;SLC27A2                                    |
| lightyellow BP | GO:0030804 | positive regulation of cyclic nucleotide... | 17735 | 67   | 27  | 2  | 0.1  | 0.00415  | 20       | AKAP12;NTRK1                                                 |
| lightyellow MF | GO:0001077 | RNA polymerase II core promoter proximal... | 17735 | 67   | 27  | 2  | 0.1  | 0.0042   | 20       | EPAS1;GATA2                                                  |
| lightyellow BP | GO:0030810 | positive regulation of nucleotide biosyn... | 17735 | 69   | 27  | 2  | 0.1  | 0.0044   | 20       | AKAP12;NTRK1                                                 |
| lightyellow BP | GO:1900373 | positive regulation of purine nucleotide... | 17735 | 69   | 27  | 2  | 0.1  | 0.0044   | 20       | AKAP12;NTRK1                                                 |
| lightyellow BP | GO:0030801 | positive regulation of cyclic nucleotide... | 17735 | 70   | 27  | 2  | 0.1  | 0.00452  | 20       | AKAP12;NTRK1                                                 |
| lightyellow BP | GO:1900544 | positive regulation of purine nucleotide... | 17735 | 72   | 27  | 2  | 0.1  | 0.00478  | 20       | AKAP12;NTRK1                                                 |
| lightyellow BP | GO:0010518 | positive regulation of phospholipase act... | 17735 | 73   | 27  | 2  | 0.11 | 0.00491  | 18.18182 | MS4A2;NTRK1                                                  |
| lightyellow BP | GO:0045981 | positive regulation of nucleotide metabo... | 17735 | 73   | 27  | 2  | 0.11 | 0.00491  | 18.18182 | AKAP12;NTRK1                                                 |
| lightyellow MF | GO:0001228 | RNA polymerase II transcription regulato... | 17735 | 73   | 27  | 2  | 0.11 | 0.005    | 18.18182 | EPAS1;GATA2                                                  |
| lightyellow MF | GO:0000981 | sequence-specific DNA binding RNA polyme... | 17735 | 253  | 27  | 3  | 0.37 | 0.0056   | 8.108108 | EPAS1;GATA2;PTGER3                                           |
| lightyellow BP | GO:0010517 | regulation of phospholipase activity        | 17735 | 80   | 27  | 2  | 0.12 | 0.00587  | 16.66667 | MS4A2;NTRK1                                                  |
| lightyellow BP | GO:0044281 | small molecule metabolic process            | 17735 | 2545 | 27  | 9  | 3.68 | 0.00591  | 2.446552 | AKAP12;CA8;CYP11A1;ENPP3;EPAS1;HDC;HPGDS;NTRK1;SLC27A2       |
| lightyellow BP | GO:0044710 | single-organism metabolic process           | 17735 | 3059 | 27  | 10 | 4.42 | 0.00593  | 2.262443 | AKAP12;CA8;CYP11A1;ENPP3;EPAS1;HDC;HPGDS;ITGB8;NTRK1;SLC27A2 |
| lightyellow BP | GO:0001892 | embryonic placenta development              | 17735 | 81   | 27  | 2  | 0.12 | 0.00601  | 16.66667 | EPAS1;GATA2                                                  |
| lightyellow BP | GO:0060193 | positive regulation of lipase activity      | 17735 | 81   | 27  | 2  | 0.12 | 0.00601  | 16.66667 | MS4A2;NTRK1                                                  |
| lightyellow BP | GO:0030817 | regulation of cAMP biosynthetic process     | 17735 | 86   | 27  | 2  | 0.12 | 0.00675  | 16.66667 | AKAP12;NTRK1                                                 |
| lightyellow BP | GO:0032844 | regulation of homeostatic process           | 17735 | 275  | 27  | 3  | 0.4  | 0.00692  | 7.5      | GATA2;MS4A2;PTGER3                                           |
| lightyellow BP | GO:0030218 | erythrocyte differentiation                 | 17735 | 88   | 27  | 2  | 0.13 | 0.00706  | 15.38462 | EPAS1;GATA2                                                  |
| lightyellow BP | GO:0030814 | regulation of cAMP metabolic process        | 17735 | 88   | 27  | 2  | 0.13 | 0.00706  | 15.38462 | AKAP12;NTRK1                                                 |
| lightyellow BP | GO:0045766 | positive regulation of angiogenesis         | 17735 | 89   | 27  | 2  | 0.13 | 0.00721  | 15.38462 | GATA2;NTRK1                                                  |
| lightyellow BP | GO:0006171 | cAMP biosynthetic process                   | 17735 | 92   | 27  | 2  | 0.13 | 0.00769  | 15.38462 | AKAP12;NTRK1                                                 |
| lightyellow BP | GO:0043279 | response to alkaloid                        | 17735 | 92   | 27  | 2  | 0.13 | 0.00769  | 15.38462 | CYP11A1;NTRK1                                                |
| lightyellow BP | GO:0034101 | erythrocyte homeostasis                     | 17735 | 95   | 27  | 2  | 0.14 | 0.00818  | 14.28571 | EPAS1;GATA2                                                  |
| lightyellow BP | GO:0030802 | regulation of cyclic nucleotide biosynth... | 17735 | 98   | 27  | 2  | 0.14 | 0.00869  | 14.28571 | AKAP12;NTRK1                                                 |
| lightyellow MF | GO:0000982 | RNA polymerase II core promoter proximal... | 17735 | 98   | 27  | 2  | 0.14 | 0.0088   | 14.28571 | EPAS1;GATA2                                                  |
| lightyellow BP | GO:0008584 | male gonad development                      | 17735 | 100  | 27  | 2  | 0.14 | 0.00903  | 14.28571 | CYP11A1;NTRK1                                                |
| lightyellow BP | GO:0030808 | regulation of nucleotide biosynthetic pr... | 17735 | 101  | 27  | 2  | 0.15 | 0.0092   | 13.33333 | AKAP12;NTRK1                                                 |
| lightyellow BP | GO:1900371 | regulation of purine nucleotide biosynth... | 17735 | 101  | 27  | 2  | 0.15 | 0.0092   | 13.33333 | AKAP12;NTRK1                                                 |
| lightyellow BP | GO:0030799 | regulation of cyclic nucleotide metaboli... | 17735 | 105  | 27  | 2  | 0.15 | 0.00992  | 13.33333 | AKAP12;NTRK1                                                 |
| lightyellow BP | GO:0060191 | regulation of lipase activity               | 17735 | 107  | 27  | 2  | 0.15 | 0.01028  | 13.33333 | MS4A2;NTRK1                                                  |
| lightyellow BP | GO:0046058 | cAMP metabolic process                      | 17735 | 108  | 27  | 2  | 0.16 | 0.01047  | 12.5     | AKAP12;NTRK1                                                 |
| lightyellow BP | GO:0001894 | tissue homeostasis                          | 17735 | 110  | 27  | 2  | 0.16 | 0.01084  | 12.5     | EPAS1;GATA2                                                  |
| lightyellow BP | GO:0052652 | cyclic purine nucleotide metabolic proce... | 17735 | 111  | 27  | 2  | 0.16 | 0.01103  | 12.5     | AKAP12;NTRK1                                                 |
| lightyellow BP | GO:0009190 | cyclic nucleotide biosynthetic process      | 17735 | 112  | 27  | 2  | 0.16 | 0.01122  | 12.5     | AKAP12;NTRK1                                                 |
| lightyellow BP | GO:0048469 | cell maturation                             | 17735 | 116  | 27  | 2  | 0.17 | 0.012    | 11.76471 | EPAS1;GATA2                                                  |
| lightyellow BP | GO:0046546 | development of primary male sexual chara... | 17735 | 117  | 27  | 2  | 0.17 | 0.0122   | 11.76471 | CYP11A1;NTRK1                                                |
| lightyellow BP | GO:0046661 | male sex differentiation                    | 17735 | 125  | 27  | 2  | 0.18 | 0.01384  | 11.11111 | CYP11A1;NTRK1                                                |
| lightyellow BP | GO:0010738 | regulation of protein kinase A signaling... | 17735 | 10   | 27  | 1  | 0.01 | 0.01435  | 100      | AKAP12                                                       |
| lightyellow BP | GO:0021535 | cell migration in hindbrain                 | 17735 | 10   | 27  | 1  | 0.01 | 0.01435  | 100      | CTNNA2                                                       |
| lightyellow BP | GO:0031650 | regulation of heat generation               | 17735 | 10   | 27  | 1  | 0.01 | 0.01435  | 100      | PTGER3                                                       |
| lightyellow BP | GO:0043302 | positive regulation of leukocyte degranu... | 17735 | 10   | 27  | 1  | 0.01 | 0.01435  | 100      | MS4A2                                                        |
| lightyellow BP | GO:0006872 | semicircular canal development              | 17735 | 10   | 27  | 1  | 0.01 | 0.01435  | 100      | GATA2                                                        |
| lightyellow BP | GO:0071236 | cellular response to antibiotic             | 17735 | 10   | 27  | 1  | 0.01 | 0.01435  | 100      | CYP11A1                                                      |
| lightyellow MF | GO:0004467 | long-chain fatty acid-CoA ligase activit... | 17735 | 10   | 27  | 1  | 0.01 | 0.0145   | 100      | SLC27A2                                                      |
| lightyellow BP | GO:0017085 | response to insecticide                     | 17735 | 11   | 27  | 1  | 0.02 | 0.01578  | 50       | CYP11A1                                                      |
| lightyellow BP | GO:0021514 | ventral spinal cord interneuron differen... | 17735 | 11   | 27  | 1  | 0.02 | 0.01578  | 50       | GATA2                                                        |

|                |            |                                             |       |      |    |   |      |         |                                           |
|----------------|------------|---------------------------------------------|-------|------|----|---|------|---------|-------------------------------------------|
| lightyellow BP | GO:0032354 | response to follicle-stimulating hormone... | 17735 | 11   | 27 | 1 | 0.02 | 0.01578 | 50 CYP11A1                                |
| lightyellow BP | GO:0033005 | positive regulation of mast cell activat... | 17735 | 11   | 27 | 1 | 0.02 | 0.01578 | 50 MS4A2                                  |
| lightyellow BP | GO:0033327 | Leydig cell differentiation                 | 17735 | 11   | 27 | 1 | 0.02 | 0.01578 | 50 CYP11A1                                |
| lightyellow BP | GO:0048875 | chemical homeostasis within a tissue        | 17735 | 11   | 27 | 1 | 0.02 | 0.01578 | 50 EPAS1                                  |
| lightyellow BP | GO:0050951 | sensory perception of temperature stimul... | 17735 | 11   | 27 | 1 | 0.02 | 0.01578 | 50 NTRK1                                  |
| lightyellow MF | GO:0004955 | prostaglandin receptor activity             | 17735 | 11   | 27 | 1 | 0.02 | 0.0159  | 50 PTGER3                                 |
| lightyellow BP | GO:0009187 | cyclic nucleotide metabolic process         | 17735 | 138  | 27 | 2 | 0.2  | 0.01669 | 10 AKAP12;NTRK1                           |
| lightyellow BP | GO:0048015 | phosphatidylinositol-mediated signaling     | 17735 | 138  | 27 | 2 | 0.2  | 0.01669 | 10 CA8;NTRK1                              |
| lightyellow BP | GO:0048017 | inositol lipid-mediated signaling           | 17735 | 138  | 27 | 2 | 0.2  | 0.01669 | 10 CA8;NTRK1                              |
| lightyellow BP | GO:0006694 | steroid biosynthetic process                | 17735 | 139  | 27 | 2 | 0.2  | 0.01692 | 10 CYP11A1;SLC27A2                        |
| lightyellow BP | GO:0010737 | protein kinase A signaling cascade          | 17735 | 12   | 27 | 1 | 0.02 | 0.0172  | 50 AKAP12                                 |
| lightyellow BP | GO:0045652 | regulation of megakaryocyte differentiat... | 17735 | 12   | 27 | 1 | 0.02 | 0.0172  | 50 GATA2                                  |
| lightyellow BP | GO:0060134 | prepulse inhibition                         | 17735 | 12   | 27 | 1 | 0.02 | 0.0172  | 50 CTNNA2                                 |
| lightyellow MF | GO:0004953 | icosanoid receptor activity                 | 17735 | 12   | 27 | 1 | 0.02 | 0.0173  | 50 PTGER3                                 |
| lightyellow MF | GO:0004954 | prostanoid receptor activity                | 17735 | 12   | 27 | 1 | 0.02 | 0.0173  | 50 PTGER3                                 |
| lightyellow BP | GO:1901615 | organic hydroxy compound metabolic proce... | 17735 | 387  | 27 | 3 | 0.56 | 0.01743 | 5.357143 CYP11A1;EPAS1;HDC                |
| lightyellow MF | GO:0019899 | enzyme binding                              | 17735 | 1084 | 27 | 5 | 1.58 | 0.0177  | 3.164557 AKAP12;CCNA1;EPAS1;MS4A2;SLC27A2 |
| lightyellow BP | GO:0001573 | ganglioside metabolic process               | 17735 | 13   | 27 | 1 | 0.02 | 0.01862 | 50 ITGB8                                  |
| lightyellow BP | GO:0042448 | progesterone metabolic process              | 17735 | 13   | 27 | 1 | 0.02 | 0.01862 | 50 CYP11A1                                |
| lightyellow MF | GO:0070742 | C2H2 zinc finger domain binding             | 17735 | 13   | 27 | 1 | 0.02 | 0.0188  | 50 GATA2                                  |
| lightyellow BP | GO:0001991 | regulation of systemic arterial blood pr... | 17735 | 14   | 27 | 1 | 0.02 | 0.02004 | 50 CPA3                                   |
| lightyellow BP | GO:0006702 | androgen biosynthetic process               | 17735 | 14   | 27 | 1 | 0.02 | 0.02004 | 50 CYP11A1                                |
| lightyellow BP | GO:0031649 | heat generation                             | 17735 | 14   | 27 | 1 | 0.02 | 0.02004 | 50 PTGER3                                 |
| lightyellow BP | GO:0045649 | regulation of macrophage differentiation    | 17735 | 14   | 27 | 1 | 0.02 | 0.02004 | 50 GATA2                                  |
| lightyellow BP | GO:0060008 | Sertoli cell differentiation                | 17735 | 14   | 27 | 1 | 0.02 | 0.02004 | 50 NTRK1                                  |
| lightyellow BP | GO:0060384 | innervation                                 | 17735 | 14   | 27 | 1 | 0.02 | 0.02004 | 50 NTRK1                                  |
| lightyellow BP | GO:0071276 | cellular response to cadmium ion            | 17735 | 14   | 27 | 1 | 0.02 | 0.02004 | 50 CYP11A1                                |
| lightyellow BP | GO:0071371 | cellular response to gonadotropin stimul... | 17735 | 14   | 27 | 1 | 0.02 | 0.02004 | 50 CYP11A1                                |
| lightyellow BP | GO:0097237 | cellular response to toxin                  | 17735 | 14   | 27 | 1 | 0.02 | 0.02004 | 50 CYP11A1                                |
| lightyellow BP | GO:2000178 | negative regulation of neural precursor ... | 17735 | 14   | 27 | 1 | 0.02 | 0.02004 | 50 GATA2                                  |
| lightyellow MF | GO:0016829 | lyase activity                              | 17735 | 151  | 27 | 2 | 0.22 | 0.0201  | 9.090909 CA8;HDC                          |
| lightyellow MF | GO:0004089 | carbonate dehydratase activity              | 17735 | 14   | 27 | 1 | 0.02 | 0.0202  | 50 CA8                                    |
| lightyellow MF | GO:0015295 | solute:hydrogen symporter activity          | 17735 | 14   | 27 | 1 | 0.02 | 0.0202  | 50 SLC2A10                                |
| lightyellow MF | GO:0015645 | fatty acid ligase activity                  | 17735 | 14   | 27 | 1 | 0.02 | 0.0202  | 50 SLC27A2                                |
| lightyellow BP | GO:0045765 | regulation of angiogenesis                  | 17735 | 157  | 27 | 2 | 0.23 | 0.02127 | 8.695652 GATA2;NTRK1                      |
| lightyellow BP | GO:0050755 | chemokine metabolic process                 | 17735 | 15   | 27 | 1 | 0.02 | 0.02146 | 50 CYP11A1                                |
| lightyellow BP | GO:1901617 | organic hydroxy compound biosynthetic pr... | 17735 | 158  | 27 | 2 | 0.23 | 0.02152 | 8.695652 CYP11A1;HDC                      |
| lightyellow CC | GO:0005779 | integral to peroxisomal membrane            | 17735 | 14   | 27 | 1 | 0.02 | 0.022   | 50 SLC27A2                                |
| lightyellow CC | GO:0031231 | intrinsic to peroxisomal membrane           | 17735 | 14   | 27 | 1 | 0.02 | 0.022   | 50 SLC27A2                                |
| lightyellow BP | GO:0071407 | cellular response to organic cyclic comp... | 17735 | 162  | 27 | 2 | 0.23 | 0.02255 | 8.695652 CYP11A1;NTRK1                    |
| lightyellow MF | GO:0004518 | nuclease activity                           | 17735 | 161  | 27 | 2 | 0.23 | 0.0227  | 8.695652 ENPP3;LOC81691                   |
| lightyellow BP | GO:0007141 | male meiosis I                              | 17735 | 16   | 27 | 1 | 0.02 | 0.02287 | 50 CCNA1                                  |
| lightyellow BP | GO:0007617 | mating behavior                             | 17735 | 16   | 27 | 1 | 0.02 | 0.02287 | 50 CYP11A1                                |
| lightyellow BP | GO:0009713 | catechol-containing compound biosyntheti... | 17735 | 16   | 27 | 1 | 0.02 | 0.02287 | 50 HDC                                    |
| lightyellow BP | GO:0034312 | diol biosynthetic process                   | 17735 | 16   | 27 | 1 | 0.02 | 0.02287 | 50 HDC                                    |
| lightyellow BP | GO:0042423 | catecholamine biosynthetic process          | 17735 | 16   | 27 | 1 | 0.02 | 0.02287 | 50 HDC                                    |
| lightyellow BP | GO:0043304 | regulation of mast cell degranulation       | 17735 | 16   | 27 | 1 | 0.02 | 0.02287 | 50 MS4A2                                  |
| lightyellow BP | GO:0045746 | negative regulation of Notch signaling p... | 17735 | 16   | 27 | 1 | 0.02 | 0.02287 | 50 GATA2                                  |
| lightyellow BP | GO:0046189 | phenol-containing compound biosynthetic ... | 17735 | 16   | 27 | 1 | 0.02 | 0.02287 | 50 HDC                                    |
| lightyellow BP | GO:0051968 | positive regulation of synaptic transmis... | 17735 | 16   | 27 | 1 | 0.02 | 0.02287 | 50 NTRK1                                  |
| lightyellow MF | GO:0000980 | RNA polymerase II distal enhancer sequen... | 17735 | 16   | 27 | 1 | 0.02 | 0.023   | 50 GATA2                                  |
| lightyellow MF | GO:0001871 | pattern binding                             | 17735 | 16   | 27 | 1 | 0.02 | 0.023   | 50 ENPP3                                  |
| lightyellow MF | GO:0008395 | steroid hydroxylase activity                | 17735 | 16   | 27 | 1 | 0.02 | 0.023   | 50 CYP11A1                                |
| lightyellow MF | GO:0030247 | polysaccharide binding                      | 17735 | 16   | 27 | 1 | 0.02 | 0.023   | 50 ENPP3                                  |
| lightyellow BP | GO:0033006 | regulation of mast cell activation invol... | 17735 | 17   | 27 | 1 | 0.02 | 0.02428 | 50 MS4A2                                  |
| lightyellow BP | GO:0042359 | vitamin D metabolic process                 | 17735 | 17   | 27 | 1 | 0.02 | 0.02428 | 50 CYP11A1                                |
| lightyellow BP | GO:0051412 | response to corticosterone stimulus         | 17735 | 17   | 27 | 1 | 0.02 | 0.02428 | 50 CYP11A1                                |
| lightyellow MF | GO:0035035 | histone acetyltransferase binding           | 17735 | 17   | 27 | 1 | 0.02 | 0.0245  | 50 EPAS1                                  |
| lightyellow BP | GO:1901342 | regulation of vasculature development       | 17735 | 170  | 27 | 2 | 0.25 | 0.02467 | 8 GATA2;NTRK1                             |
| lightyellow BP | GO:0001964 | startle response                            | 17735 | 18   | 27 | 1 | 0.03 | 0.02569 | 33.33333 CTNNA2                           |
| lightyellow BP | GO:0021533 | cell differentiation in hindbrain           | 17735 | 18   | 27 | 1 | 0.03 | 0.02569 | 33.33333 GATA2                            |
| lightyellow BP | GO:0031638 | zymogen activation                          | 17735 | 18   | 27 | 1 | 0.03 | 0.02569 | 33.33333 PRSS3                            |
| lightyellow BP | GO:0042401 | cellular biogenic amine biosynthetic pro... | 17735 | 18   | 27 | 1 | 0.03 | 0.02569 | 33.33333 HDC                              |
| lightyellow BP | GO:0021700 | developmental maturation                    | 17735 | 174  | 27 | 2 | 0.25 | 0.02576 | 8 EPAS1;GATA2                             |
| lightyellow MF | GO:0019865 | immunoglobulin binding                      | 17735 | 18   | 27 | 1 | 0.03 | 0.0259  | 33.33333 MS4A2                            |
| lightyellow BP | GO:0048872 | homeostasis of number of cells              | 17735 | 176  | 27 | 2 | 0.25 | 0.02631 | 8 EPAS1;GATA2                             |
| lightyellow BP | GO:0006700 | C21-steroid hormone biosynthetic process    | 17735 | 19   | 27 | 1 | 0.03 | 0.0271  | 33.33333 CYP11A1                          |
| lightyellow BP | GO:0045648 | positive regulation of erythrocyte diffe... | 17735 | 19   | 27 | 1 | 0.03 | 0.0271  | 33.33333 GATA2                            |
| lightyellow BP | GO:0060216 | definitive hemopoiesis                      | 17735 | 19   | 27 | 1 | 0.03 | 0.0271  | 33.33333 GATA2                            |

|                |            |                                             |       |      |    |    |      |         |          |                                                                                            |
|----------------|------------|---------------------------------------------|-------|------|----|----|------|---------|----------|--------------------------------------------------------------------------------------------|
| lightyellow BP | GO:0008210 | estrogen metabolic process                  | 17735 | 20   | 27 | 1  | 0.03 | 0.02851 | 33.33333 | CYP11A1                                                                                    |
| lightyellow BP | GO:0050974 | detection of mechanical stimulus involve... | 17735 | 20   | 27 | 1  | 0.03 | 0.02851 | 33.33333 | NTRK1                                                                                      |
| lightyellow BP | GO:0071312 | cellular response to alkaloid               | 17735 | 20   | 27 | 1  | 0.03 | 0.02851 | 33.33333 | NTRK1                                                                                      |
| lightyellow MF | GO:0016878 | acid-thiol ligase activity                  | 17735 | 20   | 27 | 1  | 0.03 | 0.0287  | 33.33333 | SLC27A2                                                                                    |
| lightyellow CC | GO:0044425 | membrane part                               | 17735 | 6026 | 27 | 15 | 9.71 | 0.029   | 1.544799 | C1orf186;CTNNA2;CYP11A1;ENPP3;HRH4;ITGB8;KLHDC7A;MS4A2;NTRK1;PTGER3;SLC27A2;SLC2A10;SLC45f |
| lightyellow BP | GO:0001516 | prostaglandin biosynthetic process          | 17735 | 21   | 27 | 1  | 0.03 | 0.02991 | 33.33333 | HPGDS                                                                                      |
| lightyellow BP | GO:0003081 | regulation of systemic arterial blood pr... | 17735 | 21   | 27 | 1  | 0.03 | 0.02991 | 33.33333 | CPA3                                                                                       |
| lightyellow BP | GO:0009651 | response to salt stress                     | 17735 | 21   | 27 | 1  | 0.03 | 0.02991 | 33.33333 | CYP11A1                                                                                    |
| lightyellow BP | GO:0034698 | response to gonadotropin stimulus           | 17735 | 21   | 27 | 1  | 0.03 | 0.02991 | 33.33333 | CYP11A1                                                                                    |
| lightyellow BP | GO:0043300 | regulation of leukocyte degranulation       | 17735 | 21   | 27 | 1  | 0.03 | 0.02991 | 33.33333 | MS4A2                                                                                      |
| lightyellow BP | GO:0046457 | prostanoid biosynthetic process             | 17735 | 21   | 27 | 1  | 0.03 | 0.02991 | 33.33333 | HPGDS                                                                                      |
| lightyellow BP | GO:0051385 | response to mineralocorticoid stimulus      | 17735 | 21   | 27 | 1  | 0.03 | 0.02991 | 33.33333 | CYP11A1                                                                                    |
| lightyellow BP | GO:0008406 | gonad development                           | 17735 | 189  | 27 | 2  | 0.27 | 0.03001 | 7.407407 | CYP11A1;NTRK1                                                                              |
| lightyellow BP | GO:0072330 | monocarboxylic acid biosynthetic process    | 17735 | 190  | 27 | 2  | 0.27 | 0.0303  | 7.407407 | HPGDS;SLC27A2                                                                              |
| lightyellow BP | GO:0060249 | anatomical structure homeostasis            | 17735 | 192  | 27 | 2  | 0.28 | 0.03089 | 7.142857 | EPAS1;GATA2                                                                                |
| lightyellow BP | GO:0002675 | positive regulation of acute inflammator... | 17735 | 22   | 27 | 1  | 0.03 | 0.03132 | 33.33333 | PTGER3                                                                                     |
| lightyellow BP | GO:0071320 | cellular response to cAMP                   | 17735 | 22   | 27 | 1  | 0.03 | 0.03132 | 33.33333 | CYP11A1                                                                                    |
| lightyellow BP | GO:0016054 | organic acid catabolic process              | 17735 | 198  | 27 | 2  | 0.29 | 0.03269 | 6.896552 | HDC;SLC27A2                                                                                |
| lightyellow BP | GO:0046395 | carboxylic acid catabolic process           | 17735 | 198  | 27 | 2  | 0.29 | 0.03269 | 6.896552 | HDC;SLC27A2                                                                                |
| lightyellow BP | GO:0000083 | regulation of transcription involved in ... | 17735 | 23   | 27 | 1  | 0.03 | 0.03272 | 33.33333 | CCNA1                                                                                      |
| lightyellow BP | GO:0002886 | regulation of myeloid leukocyte mediated... | 17735 | 23   | 27 | 1  | 0.03 | 0.03272 | 33.33333 | MS4A2                                                                                      |
| lightyellow BP | GO:0030219 | megakaryocyte differentiation               | 17735 | 23   | 27 | 1  | 0.03 | 0.03272 | 33.33333 | GATA2                                                                                      |
| lightyellow BP | GO:0042537 | benzene-containing compound metabolic pr... | 17735 | 23   | 27 | 1  | 0.03 | 0.03272 | 33.33333 | CYP11A1                                                                                    |
| lightyellow BP | GO:0048873 | homeostasis of number of cells within a ... | 17735 | 23   | 27 | 1  | 0.03 | 0.03272 | 33.33333 | GATA2                                                                                      |
| lightyellow MF | GO:0045296 | cadherin binding                            | 17735 | 23   | 27 | 1  | 0.03 | 0.033   | 33.33333 | CTNNA2                                                                                     |
| lightyellow MF | GO:0051018 | protein kinase A binding                    | 17735 | 23   | 27 | 1  | 0.03 | 0.033   | 33.33333 | AKAP12                                                                                     |
| lightyellow MF | GO:0051119 | sugar transmembrane transporter activity    | 17735 | 23   | 27 | 1  | 0.03 | 0.033   | 33.33333 | SLC2A10                                                                                    |
| lightyellow BP | GO:0000038 | very long-chain fatty acid metabolic pro... | 17735 | 24   | 27 | 1  | 0.03 | 0.03412 | 33.33333 | SLC27A2                                                                                    |
| lightyellow BP | GO:0010623 | developmental programmed cell death         | 17735 | 24   | 27 | 1  | 0.03 | 0.03412 | 33.33333 | NTRK1                                                                                      |
| lightyellow BP | GO:0030225 | macrophage differentiation                  | 17735 | 24   | 27 | 1  | 0.03 | 0.03412 | 33.33333 | GATA2                                                                                      |
| lightyellow BP | GO:0033003 | regulation of mast cell activation          | 17735 | 24   | 27 | 1  | 0.03 | 0.03412 | 33.33333 | MS4A2                                                                                      |
| lightyellow MF | GO:0004181 | metallocarboxypeptidase activity            | 17735 | 24   | 27 | 1  | 0.03 | 0.0344  | 33.33333 | CPA3                                                                                       |
| lightyellow MF | GO:0004364 | glutathione transferase activity            | 17735 | 24   | 27 | 1  | 0.03 | 0.0344  | 33.33333 | HPGDS                                                                                      |
| lightyellow BP | GO:0019752 | carboxylic acid metabolic process           | 17735 | 876  | 27 | 4  | 1.27 | 0.03446 | 3.149606 | CYP11A1;HDC;HPGDS;SLC27A2                                                                  |
| lightyellow BP | GO:0007420 | brain development                           | 17735 | 504  | 27 | 3  | 0.73 | 0.03462 | 4.109589 | CTNNA2;CYP11A1;GATA2                                                                       |
| lightyellow BP | GO:0009152 | purine ribonucleotide biosynthetic proce... | 17735 | 205  | 27 | 2  | 0.3  | 0.03484 | 6.666667 | AKAP12;NTRK1                                                                               |
| lightyellow BP | GO:0030097 | hemopoiesis                                 | 17735 | 509  | 27 | 3  | 0.74 | 0.03549 | 4.054054 | EPAS1;GATA2;NTRK1                                                                          |
| lightyellow BP | GO:0043303 | mast cell degranulation                     | 17735 | 25   | 27 | 1  | 0.04 | 0.03551 | 25       | MS4A2                                                                                      |
| lightyellow BP | GO:0051602 | response to electrical stimulus             | 17735 | 25   | 27 | 1  | 0.04 | 0.03551 | 25       | NTRK1                                                                                      |
| lightyellow BP | GO:0006164 | purine nucleotide biosynthetic process      | 17735 | 211  | 27 | 2  | 0.3  | 0.03672 | 6.666667 | AKAP12;NTRK1                                                                               |
| lightyellow BP | GO:0002279 | mast cell activation involved in immune ... | 17735 | 26   | 27 | 1  | 0.04 | 0.03691 | 25       | MS4A2                                                                                      |
| lightyellow BP | GO:0002448 | mast cell mediated immunity                 | 17735 | 26   | 27 | 1  | 0.04 | 0.03691 | 25       | MS4A2                                                                                      |
| lightyellow BP | GO:0014037 | Schwann cell differentiation                | 17735 | 26   | 27 | 1  | 0.04 | 0.03691 | 25       | CYP11A1                                                                                    |
| lightyellow BP | GO:0046579 | positive regulation of Ras protein signa... | 17735 | 26   | 27 | 1  | 0.04 | 0.03691 | 25       | NTRK1                                                                                      |
| lightyellow BP | GO:0048485 | sympathetic nervous system development      | 17735 | 26   | 27 | 1  | 0.04 | 0.03691 | 25       | NTRK1                                                                                      |
| lightyellow MF | GO:0001158 | enhancer sequence-specific DNA binding      | 17735 | 26   | 27 | 1  | 0.04 | 0.0372  | 25       | GATA2                                                                                      |
| lightyellow BP | GO:0007610 | behavior                                    | 17735 | 519  | 27 | 3  | 0.75 | 0.03729 | 4        | CYP11A1;HPGDS;NTRK1                                                                        |
| lightyellow BP | GO:0006699 | bile acid biosynthetic process              | 17735 | 27   | 27 | 1  | 0.04 | 0.0383  | 25       | SLC27A2                                                                                    |
| lightyellow BP | GO:0050982 | detection of mechanical stimulus            | 17735 | 27   | 27 | 1  | 0.04 | 0.0383  | 25       | NTRK1                                                                                      |
| lightyellow BP | GO:0006627 | regulation of vesicle-mediated transport    | 17735 | 216  | 27 | 2  | 0.31 | 0.03832 | 6.451613 | GATA2;MS4A2                                                                                |
| lightyellow BP | GO:0097305 | response to alcohol                         | 17735 | 217  | 27 | 2  | 0.31 | 0.03865 | 6.451613 | CYP11A1;NTRK1                                                                              |
| lightyellow BP | GO:0002376 | immune system process                       | 17735 | 1816 | 27 | 6  | 2.62 | 0.03888 | 2.990076 | ENPP3;EPAS1;GATA2;MS4A2;NTRK1;PRSS3                                                        |
| lightyellow BP | GO:0009260 | ribonucleotide biosynthetic process         | 17735 | 218  | 27 | 2  | 0.31 | 0.03897 | 6.451613 | AKAP12;NTRK1                                                                               |
| lightyellow BP | GO:0045137 | development of primary sexual characteri... | 17735 | 219  | 27 | 2  | 0.32 | 0.0393  | 6.25     | CYP11A1;NTRK1                                                                              |
| lightyellow BP | GO:0008207 | C21-steroid hormone metabolic process       | 17735 | 28   | 27 | 1  | 0.04 | 0.03969 | 25       | CYP11A1                                                                                    |
| lightyellow BP | GO:0030851 | granulocyte differentiation                 | 17735 | 28   | 27 | 1  | 0.04 | 0.03969 | 25       | GATA2                                                                                      |
| lightyellow BP | GO:0048854 | brain morphogenesis                         | 17735 | 28   | 27 | 1  | 0.04 | 0.03969 | 25       | CTNNA2                                                                                     |
| lightyellow BP | GO:0051057 | positive regulation of small GTPase medi... | 17735 | 28   | 27 | 1  | 0.04 | 0.03969 | 25       | NTRK1                                                                                      |
| lightyellow BP | GO:0006674 | placenta blood vessel development           | 17735 | 28   | 27 | 1  | 0.04 | 0.03969 | 25       | ITGB8                                                                                      |
| lightyellow BP | GO:0061418 | regulation of transcription from RNA pol... | 17735 | 28   | 27 | 1  | 0.04 | 0.03969 | 25       | EPAS1                                                                                      |
| lightyellow MF | GO:0015144 | carbohydrate transmembrane transporter a... | 17735 | 28   | 27 | 1  | 0.04 | 0.04    | 25       | SLC2A10                                                                                    |
| lightyellow MF | GO:1901476 | carbohydrate transporter activity           | 17735 | 28   | 27 | 1  | 0.04 | 0.04    | 25       | SLC2A10                                                                                    |
| lightyellow BP | GO:0045165 | cell fate commitment                        | 17735 | 222  | 27 | 2  | 0.32 | 0.04028 | 6.25     | EPAS1;GATA2                                                                                |
| lightyellow BP | GO:0046390 | ribose phosphate biosynthetic process       | 17735 | 222  | 27 | 2  | 0.32 | 0.04028 | 6.25     | AKAP12;NTRK1                                                                               |
| lightyellow CC | GO:0005887 | integral to plasma membrane                 | 17735 | 1208 | 27 | 5  | 1.95 | 0.041   | 2.564103 | ENPP3;ITGB8;MS4A2;NTRK1;PTGER3                                                             |
| lightyellow BP | GO:0006692 | prostanoid metabolic process                | 17735 | 29   | 27 | 1  | 0.04 | 0.04108 | 25       | HPGDS                                                                                      |
| lightyellow BP | GO:0006693 | prostaglandin metabolic process             | 17735 | 29   | 27 | 1  | 0.04 | 0.04108 | 25       | HPGDS                                                                                      |
| lightyellow BP | GO:0007190 | activation of adenylate cyclase activity    | 17735 | 29   | 27 | 1  | 0.04 | 0.04108 | 25       | NTRK1                                                                                      |
| lightyellow BP | GO:0008209 | androgen metabolic process                  | 17735 | 29   | 27 | 1  | 0.04 | 0.04108 | 25       | CYP11A1                                                                                    |

|                |            |                                             |       |      |    |    |      |          |          |                                                                                           |
|----------------|------------|---------------------------------------------|-------|------|----|----|------|----------|----------|-------------------------------------------------------------------------------------------|
| lightyellow MF | GO:0016877 | ligase activity, forming carbon-sulfur b... | 17735 | 29   | 27 | 1  | 0.04 | 0.0414   | 25       | SLC27A2                                                                                   |
| lightyellow MF | GO:0046875 | ephrin receptor binding                     | 17735 | 29   | 27 | 1  | 0.04 | 0.0414   | 25       | NTRK1                                                                                     |
| lightyellow BP | GO:0048534 | hematopoietic or lymphoid organ developm... | 17735 | 542  | 27 | 3  | 0.78 | 0.04159  | 3.846154 | EPAS1;GATA2;NTRK1                                                                         |
| lightyellow BP | GO:0072522 | purine-containing compound biosynthetic ... | 17735 | 227  | 27 | 2  | 0.33 | 0.04194  | 6.060606 | AKAP12;NTRK1                                                                              |
| lightyellow BP | GO:0048610 | cellular process involved in reproductio... | 17735 | 544  | 27 | 3  | 0.79 | 0.04197  | 3.797468 | CCNA1;CYP11A1;NTRK1                                                                       |
| lightyellow BP | GO:0035065 | regulation of histone acetylation           | 17735 | 30   | 27 | 1  | 0.04 | 0.04247  | 25       | GATA2                                                                                     |
| lightyellow BP | GO:0042181 | ketone biosynthetic process                 | 17735 | 30   | 27 | 1  | 0.04 | 0.04247  | 25       | CYP11A1                                                                                   |
| lightyellow BP | GO:0045599 | negative regulation of fat cell differen... | 17735 | 30   | 27 | 1  | 0.04 | 0.04247  | 25       | GATA2                                                                                     |
| lightyellow BP | GO:0050766 | positive regulation of phagocytosis         | 17735 | 30   | 27 | 1  | 0.04 | 0.04247  | 25       | GATA2                                                                                     |
| lightyellow BP | GO:0051966 | regulation of synaptic transmission, glu... | 17735 | 30   | 27 | 1  | 0.04 | 0.04247  | 25       | NTRK1                                                                                     |
| lightyellow MF | GO:0035326 | enhancer binding                            | 17735 | 30   | 27 | 1  | 0.04 | 0.0428   | 25       | GATA2                                                                                     |
| lightyellow BP | GO:0001659 | temperature homeostasis                     | 17735 | 31   | 27 | 1  | 0.04 | 0.04386  | 25       | PTGER3                                                                                    |
| lightyellow BP | GO:0035094 | response to nicotine                        | 17735 | 31   | 27 | 1  | 0.04 | 0.04386  | 25       | NTRK1                                                                                     |
| lightyellow MF | GO:0016831 | carboxy-lyase activity                      | 17735 | 31   | 27 | 1  | 0.05 | 0.0442   | 20       | HDC                                                                                       |
| lightyellow MF | GO:0042169 | SH2 domain binding                          | 17735 | 31   | 27 | 1  | 0.05 | 0.0442   | 20       | MS4A2                                                                                     |
| lightyellow BP | GO:0001990 | regulation of systemic arterial blood pr... | 17735 | 32   | 27 | 1  | 0.05 | 0.04524  | 20       | CPA3                                                                                      |
| lightyellow BP | GO:0002762 | negative regulation of myeloid leukocyte... | 17735 | 32   | 27 | 1  | 0.05 | 0.04524  | 20       | GATA2                                                                                     |
| lightyellow BP | GO:0006730 | one-carbon metabolic process                | 17735 | 32   | 27 | 1  | 0.05 | 0.04524  | 20       | CA8                                                                                       |
| lightyellow BP | GO:0007140 | male meiosis                                | 17735 | 32   | 27 | 1  | 0.05 | 0.04524  | 20       | CCNA1                                                                                     |
| lightyellow BP | GO:0014823 | response to activity                        | 17735 | 32   | 27 | 1  | 0.05 | 0.04524  | 20       | NTRK1                                                                                     |
| lightyellow BP | GO:2000756 | regulation of peptidyl-lysine acetylato...  | 17735 | 32   | 27 | 1  | 0.05 | 0.04524  | 20       | GATA2                                                                                     |
| lightyellow BP | GO:0008610 | lipid biosynthetic process                  | 17735 | 564  | 27 | 3  | 0.81 | 0.04593  | 3.703704 | CYP11A1;HPGDS;SLC27A2                                                                     |
| lightyellow CC | GO:0008305 | integrin complex                            | 17735 | 29   | 27 | 1  | 0.05 | 0.046    | 20       | ITGB8                                                                                     |
| lightyellow BP | GO:0006775 | fat-soluble vitamin metabolic process       | 17735 | 33   | 27 | 1  | 0.05 | 0.04662  | 20       | CYP11A1                                                                                   |
| lightyellow BP | GO:0009309 | amine biosynthetic process                  | 17735 | 33   | 27 | 1  | 0.05 | 0.04662  | 20       | HDC                                                                                       |
| lightyellow BP | GO:0021517 | ventral spinal cord development             | 17735 | 33   | 27 | 1  | 0.05 | 0.04662  | 20       | GATA2                                                                                     |
| lightyellow BP | GO:0045646 | regulation of erythrocyte differentiatio... | 17735 | 33   | 27 | 1  | 0.05 | 0.04662  | 20       | GATA2                                                                                     |
| lightyellow BP | GO:0045762 | positive regulation of adenylate cyclase... | 17735 | 33   | 27 | 1  | 0.05 | 0.04662  | 20       | NTRK1                                                                                     |
| lightyellow BP | GO:0046686 | response to cadmium ion                     | 17735 | 33   | 27 | 1  | 0.05 | 0.04662  | 20       | CYP11A1                                                                                   |
| lightyellow MF | GO:0015485 | cholesterol binding                         | 17735 | 33   | 27 | 1  | 0.05 | 0.047    | 20       | CYP11A1                                                                                   |
| lightyellow CC | GO:0031226 | intrinsic to plasma membrane                | 17735 | 1252 | 27 | 5  | 2.02 | 0.047    | 2.475248 | ENPP3;ITGB8;MS4A2;NTRK1;PTGER3                                                            |
| lightyellow BP | GO:0002520 | immune system development                   | 17735 | 572  | 27 | 3  | 0.83 | 0.04756  | 3.614458 | EPAS1;GATA2;NTRK1                                                                         |
| lightyellow BP | GO:0045921 | positive regulation of exocytosis           | 17735 | 34   | 27 | 1  | 0.05 | 0.048    | 20       | MS4A2                                                                                     |
| lightyellow BP | GO:0030099 | myeloid cell differentiation                | 17735 | 247  | 27 | 2  | 0.36 | 0.04882  | 5.555556 | EPAS1;GATA2                                                                               |
| lightyellow BP | GO:0007205 | protein kinase C-activating G-protein co... | 17735 | 35   | 27 | 1  | 0.05 | 0.04938  | 20       | MS4A2                                                                                     |
| lightyellow BP | GO:0007618 | mating                                      | 17735 | 35   | 27 | 1  | 0.05 | 0.04938  | 20       | CYP11A1                                                                                   |
| lightyellow BP | GO:0043436 | oxoacid metabolic process                   | 17735 | 985  | 27 | 4  | 1.42 | 0.04972  | 2.816901 | CYP11A1;HDC;HPGDS;SLC27A2                                                                 |
| lightgreen BP  | GO:0031343 | positive regulation of cell killing         | 17735 | 29   | 36 | 3  | 0.06 | 2.80E-05 | 50       | CD226;IFNG;XCL1                                                                           |
| lightgreen BP  | GO:0002889 | regulation of immunoglobulin mediated im... | 17735 | 32   | 36 | 3  | 0.07 | 3.80E-05 | 42.85714 | CD226;IFNG;XCL1                                                                           |
| lightgreen BP  | GO:0002712 | regulation of B cell mediated immunity      | 17735 | 33   | 36 | 3  | 0.07 | 4.10E-05 | 42.85714 | CD226;IFNG;XCL1                                                                           |
| lightgreen BP  | GO:0031341 | regulation of cell killing                  | 17735 | 36   | 36 | 3  | 0.07 | 5.40E-05 | 42.85714 | CD226;IFNG;XCL1                                                                           |
| lightgreen MF  | GO:0030246 | carbohydrate binding                        | 17735 | 215  | 36 | 5  | 0.5  | 0.00013  | 10       | KLRB1;KLRC1;KLRC2;KLR3;KLRF1                                                              |
| lightgreen BP  | GO:0036037 | CD8-positive, alpha-beta T cell activati... | 17735 | 10   | 36 | 2  | 0.02 | 0.00018  | 100      | IFNG;XCL1                                                                                 |
| lightgreen BP  | GO:0006968 | cellular defense response                   | 17735 | 60   | 36 | 3  | 0.12 | 0.00025  | 25       | KLR2;KLR3;KLR4                                                                            |
| lightgreen BP  | GO:0045073 | regulation of chemokine biosynthetic pro... | 17735 | 12   | 36 | 2  | 0.02 | 0.00027  | 100      | IFNG;TLR3                                                                                 |
| lightgreen CC  | GO:0044459 | plasma membrane part                        | 17735 | 1895 | 36 | 12 | 3.96 | 0.00029  | 3.030303 | ADRB2;CD226;EPHB4;GZMA;IFNG;KLRB1;KLRC1;KLRC2;KLRF1;MYO6;SLC4A4;TGFBF3;TLR3               |
| lightgreen BP  | GO:0042033 | chemokine biosynthetic process              | 17735 | 13   | 36 | 2  | 0.03 | 0.00032  | 66.66667 | IFNG;TLR3                                                                                 |
| lightgreen BP  | GO:0001906 | cell killing                                | 17735 | 68   | 36 | 3  | 0.14 | 0.00036  | 21.42857 | CD226;IFNG;XCL1                                                                           |
| lightgreen BP  | GO:0050755 | chemokine metabolic process                 | 17735 | 15   | 36 | 2  | 0.03 | 0.00042  | 66.66667 | IFNG;TLR3                                                                                 |
| lightgreen BP  | GO:0051098 | regulation of binding                       | 17735 | 178  | 36 | 4  | 0.37 | 0.00046  | 10.81081 | ADRB2;GZMA;ID2;TGFBF3                                                                     |
| lightgreen BP  | GO:0002706 | regulation of lymphocyte mediated immuni... | 17735 | 75   | 36 | 3  | 0.15 | 0.00048  | 20       | CD226;IFNG;XCL1                                                                           |
| lightgreen BP  | GO:0051100 | negative regulation of binding              | 17735 | 75   | 36 | 3  | 0.15 | 0.00048  | 20       | ADRB2;GZMA;ID2                                                                            |
| lightgreen BP  | GO:0002761 | regulation of myeloid leukocyte differen... | 17735 | 77   | 36 | 3  | 0.16 | 0.00052  | 18.75    | ID2;IFNG;TLR3                                                                             |
| lightgreen BP  | GO:0002822 | regulation of adaptive immune response b... | 17735 | 83   | 36 | 3  | 0.17 | 0.00065  | 17.64706 | CD226;IFNG;XCL1                                                                           |
| lightgreen CC  | GO:0005887 | integral to plasma membrane                 | 17735 | 1208 | 36 | 9  | 2.52 | 0.00065  | 3.571429 | ADRB2;CD226;EPHB4;KLRB1;KLRC1;KLRC2;KLRF1;SLC4A4;TGFBF3;TLR3                              |
| lightgreen BP  | GO:0010771 | negative regulation of cell morphogenesi... | 17735 | 21   | 36 | 2  | 0.04 | 0.00084  | 50       | IFNG;TGFBF3                                                                               |
| lightgreen CC  | GO:0031226 | intrinsic to plasma membrane                | 17735 | 1252 | 36 | 9  | 2.62 | 0.00084  | 3.435115 | ADRB2;CD226;EPHB4;KLRB1;KLRC1;KLRC2;KLRF1;SLC4A4;TGFBF3;TLR3                              |
| lightgreen BP  | GO:0002819 | regulation of adaptive immune response      | 17735 | 91   | 36 | 3  | 0.19 | 0.00085  | 15.78947 | CD226;IFNG;XCL1                                                                           |
| lightgreen CC  | GO:0005886 | plasma membrane                             | 17735 | 4273 | 36 | 18 | 8.93 | 0.00089  | 2.015677 | ADRB2;CD226;DSG3;ENPP5;EPHB4;GZMA;IFNG;KLRB1;KLRC1;KLRC2;KLRF1;MYO6;PHLDA1;PHLDB2;SLC4A4; |
| lightgreen BP  | GO:0002703 | regulation of leukocyte mediated immunit... | 17735 | 94   | 36 | 3  | 0.19 | 0.00094  | 15.78947 | CD226;IFNG;XCL1                                                                           |
| lightgreen BP  | GO:0032735 | positive regulation of interleukin-12 pr... | 17735 | 24   | 36 | 2  | 0.05 | 0.0011   | 40       | IFNG;TLR3                                                                                 |
| lightgreen BP  | GO:0002699 | positive regulation of immune effector p... | 17735 | 100  | 36 | 3  | 0.21 | 0.00112  | 14.28571 | CD226;IFNG;XCL1                                                                           |
| lightgreen CC  | GO:0071944 | cell periphery                              | 17735 | 4360 | 36 | 18 | 9.11 | 0.00115  | 1.975851 | ADRB2;CD226;DSG3;ENPP5;EPHB4;GZMA;IFNG;KLRB1;KLRC1;KLRC2;KLRF1;MYO6;PHLDA1;PHLDB2;SLC4A4; |
| lightgreen BP  | GO:0006955 | immune response                             | 17735 | 1081 | 36 | 8  | 2.23 | 0.00121  | 3.587444 | CD226;GZMA;IFNG;KLRB1;KLRC1;KLRC2;KLRF1;MYO6;PHLDA1;PHLDB2;SLC4A4;                        |
| lightgreen BP  | GO:0001912 | positive regulation of leukocyte mediate... | 17735 | 26   | 36 | 2  | 0.05 | 0.0013   | 40       | CD226;XCL1                                                                                |
| lightgreen BP  | GO:0033002 | muscle cell proliferation                   | 17735 | 106  | 36 | 3  | 0.22 | 0.00132  | 13.63636 | ID2;IFNG;TGFBF3                                                                           |
| lightgreen MF  | GO:0005126 | cytokine receptor binding                   | 17735 | 215  | 36 | 4  | 0.5  | 0.00148  | 8        | IFNG;TGFBF3;XCL1;XCL2                                                                     |
| lightgreen MF  | GO:0004888 | transmembrane signaling receptor activit... | 17735 | 1232 | 36 | 9  | 2.85 | 0.00156  | 3.157895 | ADRB2;EPHB4;KLRB1;KLRC1;KLRC2;KLR3;KLRF1;TGFBF3;TLR3                                      |
| lightgreen BP  | GO:0030099 | myeloid cell differentiation                | 17735 | 247  | 36 | 4  | 0.51 | 0.00157  | 7.843137 | ID2;IFNG;TGFBF3;TLR3                                                                      |



|               |            |                                              |       |      |    |    |       |         |          |                                                                                        |
|---------------|------------|----------------------------------------------|-------|------|----|----|-------|---------|----------|----------------------------------------------------------------------------------------|
| lightgreen BP | GO:0016064 | immunoglobulin mediated immune response      | 17735 | 116  | 36 | 3  | 0.24  | 0.00172 | 12.5     | CD226;IFNG;XCL1                                                                        |
| lightgreen BP | GO:0032760 | positive regulation of tumor necrosis fa...  | 17735 | 31   | 36 | 2  | 0.06  | 0.00184 | 33.33333 | IFNG;TLR3                                                                              |
| lightgreen BP | GO:0010721 | negative regulation of cell development      | 17735 | 119  | 36 | 3  | 0.25  | 0.00185 | 12       | ID2;IFNG;TGFBF3                                                                        |
| lightgreen BP | GO:0019724 | B cell mediated immunity                     | 17735 | 119  | 36 | 3  | 0.25  | 0.00185 | 12       | CD226;IFNG;XCL1                                                                        |
| lightgreen BP | GO:0001910 | regulation of leukocyte mediated cytotox...  | 17735 | 33   | 36 | 2  | 0.07  | 0.00209 | 28.57143 | CD226;XCL1                                                                             |
| lightgreen BP | GO:0002637 | regulation of immunoglobulin production      | 17735 | 33   | 36 | 2  | 0.07  | 0.00209 | 28.57143 | IFNG;XCL1                                                                              |
| lightgreen BP | GO:0045596 | negative regulation of cell differentiati... | 17735 | 454  | 36 | 5  | 0.94  | 0.00217 | 5.319149 | HOPX;ID2;IFNG;TGFBF3;TLR3                                                              |
| lightgreen BP | GO:0002763 | positive regulation of myeloid leukocyti...  | 17735 | 35   | 36 | 2  | 0.07  | 0.00235 | 28.57143 | ID2;IFNG                                                                               |
| lightgreen BP | GO:0045637 | regulation of myeloid cell differentiati...  | 17735 | 132  | 36 | 3  | 0.27  | 0.00248 | 11.11111 | ID2;IFNG;TLR3                                                                          |
| lightgreen BP | GO:0002573 | myeloid leukocyte differentiation            | 17735 | 133  | 36 | 3  | 0.27  | 0.00254 | 11.11111 | ID2;IFNG;TLR3                                                                          |
| lightgreen BP | GO:0043392 | negative regulation of DNA binding           | 17735 | 37   | 36 | 2  | 0.08  | 0.00262 | 25       | GZMA;ID2                                                                               |
| lightgreen MF | GO:0038023 | signaling receptor activity                  | 17735 | 1328 | 36 | 9  | 3.08  | 0.00262 | 2.922078 | ADRB2;EPHB4;KLRB1;KLRC1;KLRC2;KLR3;KLRF1;TGFBF3;TLR3                                   |
| lightgreen BP | GO:0045670 | regulation of osteoclast differentiation     | 17735 | 40   | 36 | 2  | 0.08  | 0.00306 | 25       | IFNG;TLR3                                                                              |
| lightgreen BP | GO:0032655 | regulation of interleukin-12 production      | 17735 | 42   | 36 | 2  | 0.09  | 0.00337 | 22.22222 | IFNG;TLR3                                                                              |
| lightgreen BP | GO:0002381 | immunoglobulin production involved in im...  | 17735 | 43   | 36 | 2  | 0.09  | 0.00353 | 22.22222 | IFNG;XCL1                                                                              |
| lightgreen BP | GO:0032615 | interleukin-12 production                    | 17735 | 43   | 36 | 2  | 0.09  | 0.00353 | 22.22222 | IFNG;TLR3                                                                              |
| lightgreen BP | GO:0002705 | positive regulation of leukocyte mediate...  | 17735 | 46   | 36 | 2  | 0.09  | 0.00403 | 22.22222 | CD226;XCL1                                                                             |
| lightgreen BP | GO:0002708 | positive regulation of lymphocyte mediat...  | 17735 | 46   | 36 | 2  | 0.09  | 0.00403 | 22.22222 | CD226;XCL1                                                                             |
| lightgreen BP | GO:0002824 | positive regulation of adaptive immune r...  | 17735 | 46   | 36 | 2  | 0.09  | 0.00403 | 22.22222 | CD226;XCL1                                                                             |
| lightgreen BP | GO:0001909 | leukocyte mediated cytotoxicity              | 17735 | 49   | 36 | 2  | 0.1   | 0.00456 | 20       | CD226;XCL1                                                                             |
| lightgreen BP | GO:0002821 | positive regulation of adaptive immune r...  | 17735 | 49   | 36 | 2  | 0.1   | 0.00456 | 20       | CD226;XCL1                                                                             |
| lightgreen BP | GO:0032642 | regulation of chemokine production           | 17735 | 49   | 36 | 2  | 0.1   | 0.00456 | 20       | IFNG;TLR3                                                                              |
| lightgreen BP | GO:0002694 | regulation of leukocyte activation           | 17735 | 334  | 36 | 4  | 0.69  | 0.00467 | 5.797101 | CD226;ID2;IFNG;XCL1                                                                    |
| lightgreen BP | GO:0051090 | regulation of sequence-specific DNA bind...  | 17735 | 338  | 36 | 4  | 0.7   | 0.00488 | 5.714286 | ID2;TGFBF3;TLR3;XCL1                                                                   |
| lightgreen MF | GO:0008009 | chemokine activity                           | 17735 | 47   | 36 | 2  | 0.11  | 0.00527 | 18.18182 | XCL1;XCL2                                                                              |
| lightgreen BP | GO:0051093 | negative regulation of developmental pro...  | 17735 | 559  | 36 | 5  | 1.15  | 0.0053  | 4.347826 | HOPX;ID2;IFNG;TGFBF3;TLR3                                                              |
| lightgreen BP | GO:0030316 | osteoclast differentiation                   | 17735 | 53   | 36 | 2  | 0.11  | 0.00531 | 18.18182 | IFNG;TLR3                                                                              |
| lightgreen BP | GO:0030593 | neutrophil chemotaxis                        | 17735 | 53   | 36 | 2  | 0.11  | 0.00531 | 18.18182 | IFNG;XCL1                                                                              |
| lightgreen BP | GO:0032602 | chemokine production                         | 17735 | 53   | 36 | 2  | 0.11  | 0.00531 | 18.18182 | IFNG;TLR3                                                                              |
| lightgreen BP | GO:0050776 | regulation of immune response                | 17735 | 560  | 36 | 5  | 1.16  | 0.00534 | 4.310345 | CD226;IFNG;KLR1;TLR3;XCL1                                                              |
| lightgreen BP | GO:0008015 | blood circulation                            | 17735 | 349  | 36 | 4  | 0.72  | 0.00546 | 5.555556 | ADRB2;ID2;IFNG;XCL2                                                                    |
| lightgreen BP | GO:0003013 | circulatory system process                   | 17735 | 350  | 36 | 4  | 0.72  | 0.00551 | 5.555556 | ADRB2;ID2;IFNG;XCL2                                                                    |
| lightgreen BP | GO:0048872 | homeostasis of number of cells               | 17735 | 176  | 36 | 3  | 0.36  | 0.00557 | 8.333333 | ID2;IFNG;TGFBF3                                                                        |
| lightgreen BP | GO:0002449 | lymphocyte mediated immunity                 | 17735 | 179  | 36 | 3  | 0.37  | 0.00583 | 8.108108 | CD226;IFNG;XCL1                                                                        |
| lightgreen BP | GO:0050865 | regulation of cell activation                | 17735 | 359  | 36 | 4  | 0.74  | 0.00603 | 5.405405 | CD226;ID2;IFNG;XCL1                                                                    |
| lightgreen BP | GO:0042108 | positive regulation of cytokine biosynth...  | 17735 | 59   | 36 | 2  | 0.12  | 0.00654 | 16.66667 | IFNG;TLR3                                                                              |
| lightgreen BP | GO:0006952 | defense response                             | 17735 | 1119 | 36 | 7  | 2.31  | 0.00664 | 3.030303 | CD226;IFNG;KLR2;KLR3;KLR4;TLR3;XCL1                                                    |
| lightgreen MF | GO:0004872 | receptor activity                            | 17735 | 1528 | 36 | 9  | 3.54  | 0.0067  | 2.542373 | ADRB2;EPHB4;KLRB1;KLR1;KLR2;KLR3;KLRF1;TGFBF3;TLR3                                     |
| lightgreen BP | GO:0045639 | positive regulation of myeloid cell diff...  | 17735 | 61   | 36 | 2  | 0.13  | 0.00698 | 15.38462 | ID2;IFNG                                                                               |
| lightgreen MF | GO:0042379 | chemokine receptor binding                   | 17735 | 55   | 36 | 2  | 0.13  | 0.00716 | 15.38462 | XCL1;XCL2                                                                              |
| lightgreen BP | GO:0002460 | adaptive immune response based on somati...  | 17735 | 193  | 36 | 3  | 0.4   | 0.00718 | 7.5      | CD226;IFNG;XCL1                                                                        |
| lightgreen BP | GO:0001824 | blastocyst development                       | 17735 | 62   | 36 | 2  | 0.13  | 0.00721 | 15.38462 | HOPX;TGFBF3                                                                            |
| lightgreen BP | GO:0002700 | regulation of production of molecular me...  | 17735 | 65   | 36 | 2  | 0.13  | 0.0079  | 15.38462 | IFNG;XCL1                                                                              |
| lightgreen BP | GO:0032640 | tumor necrosis factor production             | 17735 | 66   | 36 | 2  | 0.14  | 0.00813 | 14.28571 | IFNG;TLR3                                                                              |
| lightgreen BP | GO:0032680 | regulation of tumor necrosis factor prod...  | 17735 | 66   | 36 | 2  | 0.14  | 0.00813 | 14.28571 | IFNG;TLR3                                                                              |
| lightgreen BP | GO:0001819 | positive regulation of cytokine producti...  | 17735 | 202  | 36 | 3  | 0.42  | 0.00814 | 7.142857 | IFNG;TLR3;XCL1                                                                         |
| lightgreen BP | GO:0048660 | regulation of smooth muscle cell prolife...  | 17735 | 67   | 36 | 2  | 0.14  | 0.00837 | 14.28571 | ID2;IFNG                                                                               |
| lightgreen BP | GO:0051101 | regulation of DNA binding                    | 17735 | 67   | 36 | 2  | 0.14  | 0.00837 | 14.28571 | GZMA;ID2                                                                               |
| lightgreen BP | GO:0051341 | regulation of oxidoreductase activity        | 17735 | 67   | 36 | 2  | 0.14  | 0.00837 | 14.28571 | GZMA;IFNG                                                                              |
| lightgreen BP | GO:0002682 | regulation of immune system process          | 17735 | 884  | 36 | 6  | 1.82  | 0.00838 | 3.296703 | CD226;ID2;IFNG;KLR1;TLR3;XCL1                                                          |
| lightgreen CC | GO:0044425 | membrane part                                | 17735 | 6026 | 36 | 20 | 12.59 | 0.00849 | 1.588562 | ADRB2;CD226;DSG3;ELOVL6;ENPP4;ENPP5;EPHB4;GZMA;IFNG;KLRB1;KLR1;KLR2;KLR3;KLR4;KLRF1;MY |
| lightgreen BP | GO:0032649 | regulation of interferon-gamma productio...  | 17735 | 68   | 36 | 2  | 0.14  | 0.00861 | 14.28571 | TLR3;XCL1                                                                              |
| lightgreen BP | GO:0032675 | regulation of interleukin-6 production       | 17735 | 69   | 36 | 2  | 0.14  | 0.00886 | 14.28571 | IFNG;TLR3                                                                              |
| lightgreen BP | GO:0042102 | positive regulation of T cell proliferat...  | 17735 | 69   | 36 | 2  | 0.14  | 0.00886 | 14.28571 | IFNG;XCL1                                                                              |
| lightgreen BP | GO:0002376 | immune system process                        | 17735 | 1816 | 36 | 9  | 3.75  | 0.00891 | 2.4      | CD226;GZMA;ID2;IFNG;KLR1;TGFBF3;TLR3;XCL1;XCL2                                         |
| lightgreen BP | GO:0032635 | interleukin-6 production                     | 17735 | 70   | 36 | 2  | 0.14  | 0.00911 | 14.28571 | IFNG;TLR3                                                                              |
| lightgreen BP | GO:0048659 | smooth muscle cell proliferation             | 17735 | 70   | 36 | 2  | 0.14  | 0.00911 | 14.28571 | ID2;IFNG                                                                               |
| lightgreen BP | GO:0071706 | tumor necrosis factor superfamily cytoki...  | 17735 | 70   | 36 | 2  | 0.14  | 0.00911 | 14.28571 | IFNG;TLR3                                                                              |
| lightgreen BP | GO:0002250 | adaptive immune response                     | 17735 | 211  | 36 | 3  | 0.44  | 0.00916 | 6.818182 | CD226;IFNG;XCL1                                                                        |
| lightgreen BP | GO:0002697 | regulation of immune effector process        | 17735 | 217  | 36 | 3  | 0.45  | 0.00989 | 6.666667 | CD226;IFNG;XCL1                                                                        |
| lightgreen BP | GO:0006921 | cellular component disassembly involved ...  | 17735 | 74   | 36 | 2  | 0.15  | 0.01014 | 13.33333 | DSG3;GZMA                                                                              |
| lightgreen CC | GO:0005576 | extracellular region                         | 17735 | 2141 | 36 | 10 | 4.47  | 0.01015 | 2.237136 | ENPP5;ESM1;GZMA;GZMK;IFNG;IPAL2;PDGFD;TGFBF3;XCL1;XCL2                                 |
| lightgreen MF | GO:0004871 | signal transducer activity                   | 17735 | 1632 | 36 | 9  | 3.78  | 0.01022 | 2.380952 | ADRB2;EPHB4;KLRB1;KLR1;KLR2;KLR3;KLRF1;TGFBF3;TLR3                                     |
| lightgreen MF | GO:0060089 | molecular transducer activity                | 17735 | 1632 | 36 | 9  | 3.78  | 0.01022 | 2.380952 | ADRB2;EPHB4;KLRB1;KLR1;KLR2;KLR3;KLRF1;TGFBF3;TLR3                                     |
| lightgreen BP | GO:0002443 | leukocyte mediated immunity                  | 17735 | 221  | 36 | 3  | 0.46  | 0.01039 | 6.521739 | CD226;IFNG;XCL1                                                                        |
| lightgreen BP | GO:0002377 | immunoglobulin production                    | 17735 | 75   | 36 | 2  | 0.15  | 0.0104  | 13.33333 | IFNG;XCL1                                                                              |
| lightgreen BP | GO:0045088 | regulation of innate immune response         | 17735 | 225  | 36 | 3  | 0.46  | 0.01091 | 6.521739 | CD226;IFNG;TLR3                                                                        |
| lightgreen BP | GO:0032609 | interferon-gamma production                  | 17735 | 77   | 36 | 2  | 0.16  | 0.01094 | 12.5     | TLR3;XCL1                                                                              |
| lightgreen BP | GO:0031347 | regulation of defense response               | 17735 | 428  | 36 | 4  | 0.88  | 0.01107 | 4.545455 | CD226;IFNG;TLR3;XCL1                                                                   |

|               |            |                                             |       |      |    |    |       |         |          |                                                                                           |
|---------------|------------|---------------------------------------------|-------|------|----|----|-------|---------|----------|-------------------------------------------------------------------------------------------|
| lightgreen BP | GO:0001816 | cytokine production                         | 17735 | 430  | 36 | 4  | 0.89  | 0.01124 | 4.494382 | CD226;IFNG;TLR3;XCL1                                                                      |
| lightgreen BP | GO:0002696 | positive regulation of leukocyte activat... | 17735 | 229  | 36 | 3  | 0.47  | 0.01144 | 6.382979 | CD226;IFNG;XCL1                                                                           |
| lightgreen MF | GO:0005125 | cytokine activity                           | 17735 | 204  | 36 | 3  | 0.47  | 0.01154 | 6.382979 | IFNG;XCL1;XCL2                                                                            |
| lightgreen BP | GO:0050864 | regulation of B cell activation             | 17735 | 83   | 36 | 2  | 0.17  | 0.01262 | 11.76471 | ID2;IFNG                                                                                  |
| lightgreen BP | GO:0050867 | positive regulation of cell activation      | 17735 | 239  | 36 | 3  | 0.49  | 0.01283 | 6.122449 | CD226;IFNG;XCL1                                                                           |
| lightgreen BP | GO:0001656 | metanephros development                     | 17735 | 85   | 36 | 2  | 0.18  | 0.01321 | 11.11111 | ID2;IFNG                                                                                  |
| lightgreen BP | GO:0030218 | erythrocyte differentiation                 | 17735 | 88   | 36 | 2  | 0.18  | 0.01411 | 11.11111 | ID2;TGFB3                                                                                 |
| lightgreen BP | GO:0046631 | alpha-beta T cell activation                | 17735 | 88   | 36 | 2  | 0.18  | 0.01411 | 11.11111 | IFNG;XCL1                                                                                 |
| lightgreen BP | GO:0045944 | positive regulation of transcription fro... | 17735 | 710  | 36 | 5  | 1.46  | 0.01413 | 3.424658 | ADRB2;ID2;IFNG;MYO6;TLR3                                                                  |
| lightgreen CC | GO:0016020 | membrane                                    | 17735 | 7690 | 36 | 23 | 16.07 | 0.01437 | 1.431238 | ADRB2;CD226;DSG3;ELOVL6;ENPP4;ENPP5;EPHB4;GZMA;IFNG;KLRB1;KLRC1;KLRC2;KLR3;KLR4;KLR1;MY   |
| lightgreen BP | GO:0042035 | regulation of cytokine biosynthetic proc... | 17735 | 91   | 36 | 2  | 0.19  | 0.01504 | 10.52632 | IFNG;TLR3                                                                                 |
| lightgreen BP | GO:0002252 | immune effector process                     | 17735 | 471  | 36 | 4  | 0.97  | 0.01528 | 4.123711 | CD226;IFNG;TLR3;XCL1                                                                      |
| lightgreen MF | GO:0019199 | transmembrane receptor protein kinase ac... | 17735 | 82   | 36 | 2  | 0.19  | 0.01541 | 10.52632 | EPHB4;TGFB3                                                                               |
| lightgreen BP | GO:0045893 | positive regulation of transcription, DN... | 17735 | 1016 | 36 | 6  | 2.1   | 0.01599 | 2.857143 | ADRB2;ID2;IFNG;MYBL1;MYO6;TLR3                                                            |
| lightgreen BP | GO:0034101 | erythrocyte homeostasis                     | 17735 | 95   | 36 | 2  | 0.2   | 0.01631 | 10       | ID2;TGFB3                                                                                 |
| lightgreen BP | GO:0009615 | response to virus                           | 17735 | 263  | 36 | 3  | 0.54  | 0.01657 | 5.555556 | IFNG;TLR3;XCL1                                                                            |
| lightgreen BP | GO:0043393 | regulation of protein binding               | 17735 | 96   | 36 | 2  | 0.2   | 0.01664 | 10       | ADRB2;TGFB3                                                                               |
| lightgreen BP | GO:0051250 | negative regulation of lymphocyte activa... | 17735 | 96   | 36 | 2  | 0.2   | 0.01664 | 10       | ID2;XCL1                                                                                  |
| lightgreen BP | GO:0050671 | positive regulation of lymphocyte prolif... | 17735 | 97   | 36 | 2  | 0.2   | 0.01697 | 10       | IFNG;XCL1                                                                                 |
| lightgreen BP | GO:0048522 | positive regulation of cellular process     | 17735 | 3140 | 36 | 12 | 6.48  | 0.01728 | 1.851852 | ADRB2;CD226;GZMA;ID2;IFNG;MYBL1;MYO6;PDGFD;PHLDA1;TGFB3;TLR3;XCL1                         |
| lightgreen BP | GO:0032946 | positive regulation of mononuclear cell ... | 17735 | 98   | 36 | 2  | 0.2   | 0.0173  | 10       | IFNG;XCL1                                                                                 |
| lightgreen CC | GO:0009986 | cell surface                                | 17735 | 485  | 36 | 4  | 1.01  | 0.01787 | 3.960396 | CD226;EPHB4;IFNG;TGFB3                                                                    |
| lightgreen BP | GO:0070665 | positive regulation of leukocyte prolif...  | 17735 | 100  | 36 | 2  | 0.21  | 0.01797 | 9.52381  | IFNG;XCL1                                                                                 |
| lightgreen BP | GO:0042089 | cytokine biosynthetic process               | 17735 | 101  | 36 | 2  | 0.21  | 0.01831 | 9.52381  | IFNG;TLR3                                                                                 |
| lightgreen MF | GO:0005102 | receptor binding                            | 17735 | 1201 | 36 | 7  | 2.78  | 0.01843 | 2.517986 | CD226;ESM1;IFNG;PDGFD;TGFB3;XCL1;XCL2                                                     |
| lightgreen BP | GO:0032844 | regulation of homeostatic process           | 17735 | 275  | 36 | 3  | 0.57  | 0.01864 | 5.263158 | ID2;IFNG;XCL1                                                                             |
| lightgreen BP | GO:0042107 | cytokine metabolic process                  | 17735 | 104  | 36 | 2  | 0.21  | 0.01935 | 9.52381  | IFNG;TLR3                                                                                 |
| lightgreen BP | GO:0051092 | positive regulation of NF-kappaB transcr... | 17735 | 104  | 36 | 2  | 0.21  | 0.01935 | 9.52381  | TGFB3;TLR3                                                                                |
| lightgreen BP | GO:0051254 | positive regulation of RNA metabolic pro... | 17735 | 1063 | 36 | 6  | 2.19  | 0.0196  | 2.739726 | ADRB2;ID2;IFNG;MYBL1;MYO6;TLR3                                                            |
| lightgreen BP | GO:0030097 | hemopoiesis                                 | 17735 | 509  | 36 | 4  | 1.05  | 0.01977 | 3.809524 | ID2;IFNG;TGFB3;TLR3                                                                       |
| lightgreen BP | GO:0042129 | regulation of T cell proliferation          | 17735 | 107  | 36 | 2  | 0.22  | 0.02041 | 9.090909 | IFNG;XCL1                                                                                 |
| lightgreen BP | GO:0002385 | mucosal immune response                     | 17735 | 10   | 36 | 1  | 0.02  | 0.02045 | 50       | XCL1                                                                                      |
| lightgreen BP | GO:0002418 | immune response to tumor cell               | 17735 | 10   | 36 | 1  | 0.02  | 0.02045 | 50       | CD226                                                                                     |
| lightgreen BP | GO:0007171 | activation of transmembrane receptor pro... | 17735 | 10   | 36 | 1  | 0.02  | 0.02045 | 50       | ADRB2                                                                                     |
| lightgreen BP | GO:0007252 | I-kappaB phosphorylation                    | 17735 | 10   | 36 | 1  | 0.02  | 0.02045 | 50       | TLR3                                                                                      |
| lightgreen BP | GO:0032703 | negative regulation of interleukin-2 pro... | 17735 | 10   | 36 | 1  | 0.02  | 0.02045 | 50       | XCL1                                                                                      |
| lightgreen BP | GO:0048291 | isotype switching to IgG isotypes           | 17735 | 10   | 36 | 1  | 0.02  | 0.02045 | 50       | IFNG                                                                                      |
| lightgreen BP | GO:0048541 | Peyer's patch development                   | 17735 | 10   | 36 | 1  | 0.02  | 0.02045 | 50       | ID2                                                                                       |
| lightgreen BP | GO:0008285 | negative regulation of cell proliferatio... | 17735 | 522  | 36 | 4  | 1.08  | 0.02147 | 3.703704 | ID2;IFNG;TGFB3;XCL1                                                                       |
| lightgreen BP | GO:0002695 | negative regulation of leukocyte activat... | 17735 | 110  | 36 | 2  | 0.23  | 0.02149 | 8.695652 | ID2;XCL1                                                                                  |
| lightgreen BP | GO:0051240 | positive regulation of multicellular org... | 17735 | 524  | 36 | 4  | 1.08  | 0.02174 | 3.703704 | ADRB2;IFNG;TLR3;XCL1                                                                      |
| lightgreen BP | GO:0002440 | production of molecular mediator of immu... | 17735 | 111  | 36 | 2  | 0.23  | 0.02186 | 8.695652 | IFNG;XCL1                                                                                 |
| lightgreen BP | GO:0051249 | regulation of lymphocyte activation         | 17735 | 293  | 36 | 3  | 0.6   | 0.022   | 5        | ID2;IFNG;XCL1                                                                             |
| lightgreen CC | GO:0016021 | integral to membrane                        | 17735 | 5202 | 36 | 17 | 10.87 | 0.02241 | 1.563937 | ADRB2;CD226;DSG3;ELOVL6;ENPP4;ENPP5;EPHB4;KLRB1;KLRC1;KLRC2;KLR3;KLR4;KLR1;SLC4A4;STYK1;7 |
| lightgreen BP | GO:0002710 | negative regulation of T cell mediated i... | 17735 | 11   | 36 | 1  | 0.02  | 0.02247 | 50       | XCL1                                                                                      |
| lightgreen BP | GO:0002833 | positive regulation of response to bioti... | 17735 | 11   | 36 | 1  | 0.02  | 0.02247 | 50       | CD226                                                                                     |
| lightgreen BP | GO:0003161 | cardiac conduction system development       | 17735 | 11   | 36 | 1  | 0.02  | 0.02247 | 50       | ID2                                                                                       |
| lightgreen BP | GO:0010893 | positive regulation of steroid biosynthe... | 17735 | 11   | 36 | 1  | 0.02  | 0.02247 | 50       | IFNG                                                                                      |
| lightgreen BP | GO:0032354 | response to follicle-stimulating hormone... | 17735 | 11   | 36 | 1  | 0.02  | 0.02247 | 50       | TGFB3                                                                                     |
| lightgreen BP | GO:0033005 | positive regulation of mast cell activat... | 17735 | 11   | 36 | 1  | 0.02  | 0.02247 | 50       | CD226                                                                                     |
| lightgreen BP | GO:0034123 | positive regulation of toll-like recepto... | 17735 | 11   | 36 | 1  | 0.02  | 0.02247 | 50       | TLR3                                                                                      |
| lightgreen BP | GO:0045351 | type I interferon biosynthetic process      | 17735 | 11   | 36 | 1  | 0.02  | 0.02247 | 50       | TLR3                                                                                      |
| lightgreen BP | GO:0045830 | positive regulation of isotype switching    | 17735 | 11   | 36 | 1  | 0.02  | 0.02247 | 50       | IFNG                                                                                      |
| lightgreen BP | GO:0048537 | mucosal-associated lymphoid tissue devel... | 17735 | 11   | 36 | 1  | 0.02  | 0.02247 | 50       | ID2                                                                                       |
| lightgreen BP | GO:0048715 | negative regulation of oligodendrocyte d... | 17735 | 11   | 36 | 1  | 0.02  | 0.02247 | 50       | ID2                                                                                       |
| lightgreen BP | GO:0071636 | positive regulation of transforming grow... | 17735 | 11   | 36 | 1  | 0.02  | 0.02247 | 50       | XCL1                                                                                      |
| lightgreen BP | GO:0072182 | regulation of nephron tubule epithelial ... | 17735 | 11   | 36 | 1  | 0.02  | 0.02247 | 50       | IFNG                                                                                      |
| lightgreen BP | GO:2000406 | positive regulation of T cell migration     | 17735 | 11   | 36 | 1  | 0.02  | 0.02247 | 50       | XCL1                                                                                      |
| lightgreen BP | GO:0043433 | negative regulation of sequence-specific... | 17735 | 113  | 36 | 2  | 0.23  | 0.0226  | 8.695652 | ID2;XCL1                                                                                  |
| lightgreen BP | GO:0010628 | positive regulation of gene expression      | 17735 | 1102 | 36 | 6  | 2.27  | 0.02301 | 2.643172 | ADRB2;ID2;IFNG;MYBL1;MYO6;TLR3                                                            |
| lightgreen BP | GO:0009887 | organ morphogenesis                         | 17735 | 808  | 36 | 5  | 1.67  | 0.02345 | 2.994012 | EPHB4;ID2;IFNG;MYO6;TGFB3                                                                 |
| lightgreen BP | GO:0009967 | positive regulation of signal transducti... | 17735 | 812  | 36 | 5  | 1.68  | 0.0239  | 2.97619  | ADRB2;CD226;IFNG;TGFB3;TLR3                                                               |
| lightgreen BP | GO:0048534 | hematopoietic or lymphoid organ developm... | 17735 | 542  | 36 | 4  | 1.12  | 0.02426 | 3.571429 | ID2;IFNG;TGFB3;TLR3                                                                       |
| lightgreen BP | GO:0002251 | organ or tissue specific immune response    | 17735 | 12   | 36 | 1  | 0.02  | 0.02449 | 50       | XCL1                                                                                      |
| lightgreen BP | GO:0002701 | negative regulation of production of mol... | 17735 | 12   | 36 | 1  | 0.02  | 0.02449 | 50       | XCL1                                                                                      |
| lightgreen BP | GO:0002719 | negative regulation of cytokine producti... | 17735 | 12   | 36 | 1  | 0.02  | 0.02449 | 50       | XCL1                                                                                      |
| lightgreen BP | GO:0003085 | negative regulation of systemic arterial... | 17735 | 12   | 36 | 1  | 0.02  | 0.02449 | 50       | ADRB2                                                                                     |
| lightgreen BP | GO:0010818 | T cell chemotaxis                           | 17735 | 12   | 36 | 1  | 0.02  | 0.02449 | 50       | XCL1                                                                                      |
| lightgreen BP | GO:0034390 | smooth muscle cell apoptotic process        | 17735 | 12   | 36 | 1  | 0.02  | 0.02449 | 50       | IFNG                                                                                      |

|               |            |                                              |       |      |    |    |       |         |          |                                                                                        |
|---------------|------------|----------------------------------------------|-------|------|----|----|-------|---------|----------|----------------------------------------------------------------------------------------|
| lightgreen BP | GO:0034391 | regulation of smooth muscle cell apoptot...  | 17735 | 12   | 36 | 1  | 0.02  | 0.02449 | 50       | IFNG                                                                                   |
| lightgreen BP | GO:0040015 | negative regulation of multicellular org...  | 17735 | 12   | 36 | 1  | 0.02  | 0.02449 | 50       | ADRB2                                                                                  |
| lightgreen BP | GO:0042362 | fat-soluble vitamin biosynthetic process     | 17735 | 12   | 36 | 1  | 0.02  | 0.02449 | 50       | IFNG                                                                                   |
| lightgreen BP | GO:0042510 | regulation of tyrosine phosphorylation o...  | 17735 | 12   | 36 | 1  | 0.02  | 0.02449 | 50       | IFNG                                                                                   |
| lightgreen BP | GO:0045078 | positive regulation of interferon-gamma ...  | 17735 | 12   | 36 | 1  | 0.02  | 0.02449 | 50       | TLR3                                                                                   |
| lightgreen BP | GO:0045346 | regulation of MHC class II biosynthetic ...  | 17735 | 12   | 36 | 1  | 0.02  | 0.02449 | 50       | IFNG                                                                                   |
| lightgreen BP | GO:0070670 | response to interleukin-4                    | 17735 | 12   | 36 | 1  | 0.02  | 0.02449 | 50       | XCL1                                                                                   |
| lightgreen MF | GO:0019838 | growth factor binding                        | 17735 | 105  | 36 | 2  | 0.24  | 0.0245  | 8.333333 | ESM1;TGFB3                                                                             |
| lightgreen BP | GO:0050866 | negative regulation of cell activation       | 17735 | 119  | 36 | 2  | 0.25  | 0.02488 | 8        | ID2;XCL1                                                                               |
| lightgreen BP | GO:0006468 | protein phosphorylation                      | 17735 | 1126 | 36 | 6  | 2.32  | 0.02529 | 2.586207 | ADRB2;EPH4;IFNG;PDGFD;TGFB3;TLR3                                                       |
| lightgreen BP | GO:0045321 | leukocyte activation                         | 17735 | 552  | 36 | 4  | 1.14  | 0.02574 | 3.508772 | CD226;ID2;IFNG;XCL1                                                                    |
| lightgreen BP | GO:0002684 | positive regulation of immune system pro...  | 17735 | 554  | 36 | 4  | 1.14  | 0.02604 | 3.508772 | CD226;IFNG;TLR3;XCL1                                                                   |
| lightgreen BP | GO:0030595 | leukocyte chemotaxis                         | 17735 | 123  | 36 | 2  | 0.25  | 0.02646 | 8        | IFNG;XCL1                                                                              |
| lightgreen BP | GO:0001916 | positive regulation of T cell mediated c...  | 17735 | 13   | 36 | 1  | 0.03  | 0.0265  | 33.33333 | XCL1                                                                                   |
| lightgreen BP | GO:0002347 | response to tumor cell                       | 17735 | 13   | 36 | 1  | 0.03  | 0.0265  | 33.33333 | CD226                                                                                  |
| lightgreen BP | GO:0002704 | negative regulation of leukocyte mediate...  | 17735 | 13   | 36 | 1  | 0.03  | 0.0265  | 33.33333 | XCL1                                                                                   |
| lightgreen BP | GO:0002707 | negative regulation of lymphocyte mediat...  | 17735 | 13   | 36 | 1  | 0.03  | 0.0265  | 33.33333 | XCL1                                                                                   |
| lightgreen BP | GO:0002714 | positive regulation of B cell mediated i...  | 17735 | 13   | 36 | 1  | 0.03  | 0.0265  | 33.33333 | CD226                                                                                  |
| lightgreen BP | GO:0002724 | regulation of T cell cytokine production     | 17735 | 13   | 36 | 1  | 0.03  | 0.0265  | 33.33333 | XCL1                                                                                   |
| lightgreen BP | GO:0002891 | positive regulation of immunoglobulin me...  | 17735 | 13   | 36 | 1  | 0.03  | 0.0265  | 33.33333 | CD226                                                                                  |
| lightgreen BP | GO:0034695 | response to prostaglandin E stimulus         | 17735 | 13   | 36 | 1  | 0.03  | 0.0265  | 33.33333 | TGFB3                                                                                  |
| lightgreen BP | GO:0042832 | defense response to protozoan                | 17735 | 13   | 36 | 1  | 0.03  | 0.0265  | 33.33333 | IFNG                                                                                   |
| lightgreen BP | GO:0045342 | MHC class II biosynthetic process            | 17735 | 13   | 36 | 1  | 0.03  | 0.0265  | 33.33333 | IFNG                                                                                   |
| lightgreen BP | GO:0045911 | positive regulation of DNA recombination     | 17735 | 13   | 36 | 1  | 0.03  | 0.0265  | 33.33333 | IFNG                                                                                   |
| lightgreen BP | GO:0045986 | negative regulation of smooth muscle con...  | 17735 | 13   | 36 | 1  | 0.03  | 0.0265  | 33.33333 | ADRB2                                                                                  |
| lightgreen BP | GO:0051044 | positive regulation of membrane protein ...  | 17735 | 13   | 36 | 1  | 0.03  | 0.0265  | 33.33333 | IFNG                                                                                   |
| lightgreen BP | GO:0072160 | nephron tubule epithelial cell differenti... | 17735 | 13   | 36 | 1  | 0.03  | 0.0265  | 33.33333 | IFNG                                                                                   |
| lightgreen BP | GO:1901623 | regulation of lymphocyte chemotaxis          | 17735 | 13   | 36 | 1  | 0.03  | 0.0265  | 33.33333 | XCL1                                                                                   |
| lightgreen BP | GO:2000404 | regulation of T cell migration               | 17735 | 13   | 36 | 1  | 0.03  | 0.0265  | 33.33333 | XCL1                                                                                   |
| lightgreen BP | GO:2000696 | regulation of epithelial cell differenti...  | 17735 | 13   | 36 | 1  | 0.03  | 0.0265  | 33.33333 | IFNG                                                                                   |
| lightgreen BP | GO:0006950 | response to stress                           | 17735 | 2926 | 36 | 11 | 6.04  | 0.02659 | 1.821192 | ADRB2;CD226;ID2;IFNG;KLR2;KLR3;KLR4;MYO6;TGFB3;TLR3;XCL1                               |
| lightgreen MF | GO:0048185 | activin binding                              | 17735 | 12   | 36 | 1  | 0.03  | 0.02745 | 33.33333 | TGFB3                                                                                  |
| lightgreen MF | GO:0050431 | transforming growth factor beta binding      | 17735 | 12   | 36 | 1  | 0.03  | 0.02745 | 33.33333 | TGFB3                                                                                  |
| lightgreen CC | GO:0031224 | intrinsic to membrane                        | 17735 | 5319 | 36 | 17 | 11.11 | 0.02785 | 1.530153 | ADRB2;CD226;DSG3;ELOVL6;ENPP4;ENPP5;EPH4;KLRB1;KLR1;KLR2;KLR3;KLR4;KLR1;SLC4A4;STYK1;7 |
| lightgreen BP | GO:0032388 | positive regulation of intracellular tra...  | 17735 | 127  | 36 | 2  | 0.26  | 0.02807 | 7.692308 | TLR3;XCL1                                                                              |
| lightgreen BP | GO:0003337 | mesenchymal to epithelial transition inv...  | 17735 | 14   | 36 | 1  | 0.03  | 0.02851 | 33.33333 | IFNG                                                                                   |
| lightgreen BP | GO:0006925 | inflammatory cell apoptotic process          | 17735 | 14   | 36 | 1  | 0.03  | 0.02851 | 33.33333 | IFNG                                                                                   |
| lightgreen BP | GO:0010719 | negative regulation of epithelial to mes...  | 17735 | 14   | 36 | 1  | 0.03  | 0.02851 | 33.33333 | TGFB3                                                                                  |
| lightgreen BP | GO:0010922 | positive regulation of phosphatase activ...  | 17735 | 14   | 36 | 1  | 0.03  | 0.02851 | 33.33333 | IFNG                                                                                   |
| lightgreen BP | GO:0031649 | heat generation                              | 17735 | 14   | 36 | 1  | 0.03  | 0.02851 | 33.33333 | ADRB2                                                                                  |
| lightgreen BP | GO:0042508 | tyrosine phosphorylation of Stat1 protei...  | 17735 | 14   | 36 | 1  | 0.03  | 0.02851 | 33.33333 | IFNG                                                                                   |
| lightgreen BP | GO:0045649 | regulation of macrophage differentiation     | 17735 | 14   | 36 | 1  | 0.03  | 0.02851 | 33.33333 | ID2                                                                                    |
| lightgreen BP | GO:0045672 | positive regulation of osteoclast differ...  | 17735 | 14   | 36 | 1  | 0.03  | 0.02851 | 33.33333 | IFNG                                                                                   |
| lightgreen BP | GO:0046641 | positive regulation of alpha-beta T cell...  | 17735 | 14   | 36 | 1  | 0.03  | 0.02851 | 33.33333 | XCL1                                                                                   |
| lightgreen BP | GO:0051281 | positive regulation of release of seques...  | 17735 | 14   | 36 | 1  | 0.03  | 0.02851 | 33.33333 | XCL1                                                                                   |
| lightgreen BP | GO:0060347 | heart trabecula formation                    | 17735 | 14   | 36 | 1  | 0.03  | 0.02851 | 33.33333 | TGFB3                                                                                  |
| lightgreen BP | GO:2000178 | negative regulation of neural precursor ...  | 17735 | 14   | 36 | 1  | 0.03  | 0.02851 | 33.33333 | ID2                                                                                    |
| lightgreen BP | GO:0002520 | immune system development                    | 17735 | 572  | 36 | 4  | 1.18  | 0.02886 | 3.389831 | ID2;IFNG;TGFB3;TLR3                                                                    |
| lightgreen BP | GO:0023056 | positive regulation of signaling             | 17735 | 856  | 36 | 5  | 1.77  | 0.02921 | 2.824859 | ADRB2;CD226;IFNG;TGFB3;TLR3                                                            |
| lightgreen BP | GO:0048584 | positive regulation of response to stimu...  | 17735 | 1164 | 36 | 6  | 2.4   | 0.02922 | 2.5      | ADRB2;CD226;IFNG;TGFB3;TLR3;XCL1                                                       |
| lightgreen BP | GO:0010647 | positive regulation of cell communicati...   | 17735 | 858  | 36 | 5  | 1.77  | 0.02947 | 2.824859 | ADRB2;CD226;IFNG;TGFB3;TLR3                                                            |
| lightgreen BP | GO:0002521 | leukocyte differentiation                    | 17735 | 329  | 36 | 3  | 0.68  | 0.02968 | 4.411765 | ID2;IFNG;TLR3                                                                          |
| lightgreen MF | GO:0005452 | inorganic anion exchanger activity           | 17735 | 13   | 36 | 1  | 0.03  | 0.0297  | 33.33333 | SLC4A4                                                                                 |
| lightgreen BP | GO:0045444 | fat cell differentiation                     | 17735 | 132  | 36 | 2  | 0.27  | 0.03014 | 7.407407 | ADRB2;ID2                                                                              |
| lightgreen BP | GO:0002021 | response to dietary excess                   | 17735 | 15   | 36 | 1  | 0.03  | 0.03052 | 33.33333 | ADRB2                                                                                  |
| lightgreen BP | GO:0002029 | desensitization of G-protein coupled rec...  | 17735 | 15   | 36 | 1  | 0.03  | 0.03052 | 33.33333 | ADRB2                                                                                  |
| lightgreen BP | GO:0002823 | negative regulation of adaptive immune r...  | 17735 | 15   | 36 | 1  | 0.03  | 0.03052 | 33.33333 | XCL1                                                                                   |
| lightgreen MF | GO:1901338 | catecholamine binding                        | 17735 | 14   | 36 | 1  | 0.03  | 0.03195 | 33.33333 | ADRB2                                                                                  |
| lightgreen MF | GO:0003774 | motor activity                               | 17735 | 130  | 36 | 2  | 0.3   | 0.03631 | 6.666667 | KIF21A;MYO6                                                                            |
| lightgreen MF | GO:0004675 | transmembrane receptor protein serine/th...  | 17735 | 17   | 36 | 1  | 0.04  | 0.03866 | 25       | TGFB3                                                                                  |
| lightgreen MF | GO:0005003 | ephrin receptor activity                     | 17735 | 17   | 36 | 1  | 0.04  | 0.03866 | 25       | EPH4                                                                                   |
| lightgreen MF | GO:0005024 | transforming growth factor beta-activate...  | 17735 | 17   | 36 | 1  | 0.04  | 0.03866 | 25       | TGFB3                                                                                  |
| lightgreen CC | GO:0031941 | filamentous actin                            | 17735 | 20   | 36 | 1  | 0.04  | 0.04099 | 25       | MYO6                                                                                   |
| lightgreen MF | GO:0015301 | anion:anion antiporter activity              | 17735 | 19   | 36 | 1  | 0.04  | 0.04312 | 25       | SLC4A4                                                                                 |
| lightgreen MF | GO:0032393 | MHC class I receptor activity                | 17735 | 19   | 36 | 1  | 0.04  | 0.04312 | 25       | KLR1                                                                                   |
| lightgreen MF | GO:0004713 | protein tyrosine kinase activity             | 17735 | 145  | 36 | 2  | 0.34  | 0.04425 | 5.882353 | EPH4;STYK1                                                                             |
| lightgreen CC | GO:0030057 | desmosome                                    | 17735 | 22   | 36 | 1  | 0.05  | 0.045   | 20       | DSG3                                                                                   |
| lightgreen MF | GO:0000146 | microfilament motor activity                 | 17735 | 20   | 36 | 1  | 0.05  | 0.04533 | 20       | MYO6                                                                                   |
| lightgreen MF | GO:0005160 | transforming growth factor beta receptor...  | 17735 | 20   | 36 | 1  | 0.05  | 0.04533 | 20       | TGFB3                                                                                  |

|               |             |                                             |       |      |    |    |       |          |          |                                                                                                                  |
|---------------|-------------|---------------------------------------------|-------|------|----|----|-------|----------|----------|------------------------------------------------------------------------------------------------------------------|
| lightgreen MF | GO:0017134  | fibroblast growth factor binding            | 17735 | 20   | 36 | 1  | 0.05  | 0.04533  | 20       | TGFBR3                                                                                                           |
| lightgreen CC | GO:0001772  | immunological synapse                       | 17735 | 23   | 36 | 1  | 0.05  | 0.04699  | 20       | GZMA                                                                                                             |
| lightgreen MF | GO:0004252  | serine-type endopeptidase activity          | 17735 | 151  | 36 | 2  | 0.35  | 0.04759  | 5.714286 | GZMA,GZMK                                                                                                        |
| lightcyan BP  | GO:00051607 | defense response to virus                   | 17735 | 185  | 54 | 23 | 0.64  | 1.00E-30 | 35.9375  | BST2;DDX58;DDX60;DHX58;EIF2AK2;HERC5;IFI44L;IFIH1;IFIT1;IFIT2;IFIT3;IFIT5;IFITM3;IRF7;ISG15;MX1;OAS2             |
| lightcyan BP  | GO:0009615  | response to virus                           | 17735 | 263  | 54 | 24 | 0.9   | 4.20E-29 | 26.6667  | BST2;DDX58;DDX60;DHX58;EIF2AK2;HERC5;IFI44L;IFI44L;IFIH1;IFIT1;IFIT2;IFIT3;IFIT5;IFITM3;IRF7;ISG15;MX1           |
| lightcyan BP  | GO:0045087  | innate immune response                      | 17735 | 550  | 54 | 27 | 1.89  | 1.00E-25 | 14.28571 | BST2;CCL2;CTSL1;DDX58;DDX60;DHX58;HERC5;IFI6;IFIH1;IFIT1;IFIT2;IFIT3;IFIT5;IFITM3;IRF7;ISG15;MT2A;M              |
| lightcyan BP  | GO:0006952  | defense response                            | 17735 | 1119 | 54 | 32 | 3.85  | 7.00E-24 | 8.311688 | BST2;CCL2;CTSL1;DDX58;DDX60;DHX58;EIF2AK2;HERC5;IFI44L;IFI6;IFIH1;IFIT1;IFIT2;IFIT3;IFIT5;IFITM3;IRF7;           |
| lightcyan BP  | GO:0060337  | type I interferon-mediated signaling pat... | 17735 | 72   | 54 | 15 | 0.25  | 1.10E-23 | 60       | IFI6;IFIT1;IFIT2;IFIT3;IFITM3;IRF7;ISG15;MX1;OAS1;OAS2;OAS3;OASL;USP18;XAF1;ZBP1                                 |
| lightcyan BP  | GO:0071357  | cellular response to type I interferon      | 17735 | 72   | 54 | 15 | 0.25  | 1.10E-23 | 60       | IFI6;IFIT1;IFIT2;IFIT3;IFITM3;IRF7;ISG15;MX1;OAS1;OAS2;OAS3;OASL;USP18;XAF1;ZBP1                                 |
| lightcyan BP  | GO:0051707  | response to other organism                  | 17735 | 578  | 54 | 26 | 1.99  | 1.10E-23 | 13.06533 | BST2;CCL2;CMPK2;DDX58;DDX60;DHX58;EIF2AK2;HERC5;IFI44L;IFI44L;IFIH1;IFIT1;IFIT2;IFIT3;IFIT5;IFITM3;IRI           |
| lightcyan BP  | GO:0043440  | response to type I interferon               | 17735 | 73   | 54 | 15 | 0.25  | 1.40E-23 | 60       | IFI6;IFIT1;IFIT2;IFIT3;IFITM3;IRF7;ISG15;MX1;OAS1;OAS2;OAS3;OASL;USP18;XAF1;ZBP1                                 |
| lightcyan BP  | GO:0009607  | response to biotic stimulus                 | 17735 | 606  | 54 | 26 | 2.08  | 3.70E-23 | 12.5     | BST2;CCL2;CMPK2;DDX58;DDX60;DHX58;EIF2AK2;HERC5;IFI44L;IFI44L;IFIH1;IFIT1;IFIT2;IFIT3;IFIT5;IFITM3;IRI           |
| lightcyan BP  | GO:0002252  | immune effector process                     | 17735 | 471  | 54 | 24 | 1.62  | 5.60E-23 | 14.81481 | BST2;CCL2;DDX58;DDX60;DHX58;EIF2AK2;HERC5;IFI44L;IFIH1;IFIT1;IFIT2;IFIT3;IFIT5;IFITM3;IRF7;ISG15;MX1             |
| lightcyan BP  | GO:0006955  | immune response                             | 17735 | 1081 | 54 | 29 | 3.72  | 1.90E-20 | 7.795699 | BST2;CCL2;CTSL1;DDX58;DDX60;DHX58;HERC5;IFI44L;IFI6;IFIH1;IFIT1;IFIT2;IFIT3;IFIT5;IFITM3;IRF7;ISG15;M            |
| lightcyan BP  | GO:0034097  | response to cytokine stimulus               | 17735 | 497  | 54 | 21 | 1.71  | 2.90E-18 | 12.2807  | BST2;CCL2;HERC5;IFI6;IFIT1;IFIT2;IFIT3;IFITM3;IRF7;ISG15;MT2A;MX1;OAS1;OAS2;OAS3;OASL;PLSCR1;PNPT                |
| lightcyan BP  | GO:0019221  | cytokine-mediated signaling pathway         | 17735 | 335  | 54 | 18 | 1.15  | 2.00E-17 | 15.65217 | CCL2;DDX58;DDX60;DHX58;EIF2AK2;HERC5;IFI6;IFIH1;IFIT1;IFIT2;IFIT3;IFITM3;IRF7;ISG15;MT2A;MX1;OAS1;OAS2;OAS3;OASL |
| lightcyan BP  | GO:0071345  | cellular response to cytokine stimulus      | 17735 | 412  | 54 | 19 | 1.42  | 3.50E-17 | 13.38028 | CCL2;HERC5;IFI6;IFIT1;IFIT2;IFIT3;IFITM3;IRF7;ISG15;MT2A;MX1;OAS1;OAS2;OAS3;OASL;PNPT1;USP18;XAF1                |
| lightcyan BP  | GO:0045071  | negative regulation of viral genome repl... | 17735 | 32   | 54 | 9  | 0.11  | 8.30E-16 | 81.81818 | BST2;IFIT1;IFITM3;MX1;OAS1;OAS3;OASL;PLSCR1;RSAD2                                                                |
| lightcyan BP  | GO:0048525  | negative regulation of viral reproductio... | 17735 | 33   | 54 | 9  | 0.11  | 1.10E-15 | 81.81818 | BST2;IFIT1;IFITM3;MX1;OAS1;OAS3;OASL;PLSCR1;RSAD2                                                                |
| lightcyan BP  | GO:0002376  | immune system process                       | 17735 | 1816 | 54 | 30 | 6.24  | 2.40E-15 | 4.807692 | BST2;CCL2;CTSL1;DDX58;DDX60;DHX58;EIF2AK2;HERC5;IFI44L;IFI6;IFIH1;IFIT1;IFIT2;IFIT3;IFIT5;IFITM3;IRF7;           |
| lightcyan MF  | GO:0003725  | double-stranded RNA binding                 | 17735 | 43   | 54 | 9  | 0.13  | 6.30E-15 | 69.23077 | DDX58;DDX60;DHX58;EIF2AK2;IFIH1;OAS1;OAS2;OAS3;OASL                                                              |
| lightcyan BP  | GO:0019079  | viral genome replication                    | 17735 | 61   | 54 | 10 | 0.21  | 7.00E-15 | 47.61905 | BST2;CCL2;IFIT1;IFITM3;MX1;OAS1;OAS3;OASL;PLSCR1;RSAD2                                                           |
| lightcyan BP  | GO:0051704  | multi-organism process                      | 17735 | 1380 | 54 | 26 | 4.75  | 2.60E-14 | 5.473684 | BST2;CCL2;CMPK2;DDX58;DDX60;DHX58;EIF2AK2;HERC5;IFI44L;IFI44L;IFIH1;IFIT1;IFIT2;IFIT3;IFIT5;IFITM3;IRI           |
| lightcyan BP  | GO:0045069  | regulation of viral genome replication      | 17735 | 48   | 54 | 9  | 0.17  | 4.80E-14 | 52.94118 | BST2;IFIT1;IFITM3;MX1;OAS1;OAS3;OASL;PLSCR1;RSAD2                                                                |
| lightcyan BP  | GO:0043900  | regulation of multi-organism process        | 17735 | 205  | 54 | 13 | 0.7   | 1.30E-13 | 18.57143 | BST2;DDX58;DDX60;DHX58;HERC5;IFIT1;IFITM3;MX1;OAS1;OAS3;OASL;PLSCR1;RSAD2                                        |
| lightcyan BP  | GO:0043901  | negative regulation of multi-organism pr... | 17735 | 54   | 54 | 9  | 0.19  | 1.50E-13 | 47.36842 | BST2;IFIT1;IFITM3;MX1;OAS1;OAS3;OASL;PLSCR1;RSAD2                                                                |
| lightcyan BP  | GO:0006950  | response to stress                          | 17735 | 2926 | 54 | 34 | 10.06 | 2.90E-13 | 3.379722 | BST2;CCL2;CTSL1;DDX58;DDX60;DHX58;EIF2AK2;HERC5;IFI44L;IFI6;IFIH1;IFIT1;IFIT2;IFIT3;IFIT5;IFITM3;IRF7;           |
| lightcyan BP  | GO:0022415  | viral reproductive process                  | 17735 | 542  | 54 | 17 | 1.86  | 1.30E-12 | 9.139785 | BST2;CCL2;DDX58;DHX58;EIF2AK2;IFIH1;IFIT1;IFITM3;IRF7;ISG15;MX1;OAS1;OAS3;OASL;PLSCR1;RSAD2;TRII                 |
| lightcyan BP  | GO:2000242  | negative regulation of reproductive proc... | 17735 | 81   | 54 | 9  | 0.28  | 6.80E-12 | 32.14286 | BST2;IFIT1;IFITM3;MX1;OAS1;OAS3;OASL;PLSCR1;RSAD2                                                                |
| lightcyan BP  | GO:0010033  | response to organic substance               | 17735 | 1870 | 54 | 26 | 6.43  | 3.20E-11 | 4.043546 | BST2;CCL2;CMPK2;CTSL1;DDX58;EIF2AK2;HERC5;IFI6;IFIT1;IFIT2;IFIT3;IFITM3;IRF7;ISG15;MT2A;MX1;OAS1;OAS2            |
| lightcyan BP  | GO:0016032  | viral reproduction                          | 17735 | 689  | 54 | 17 | 2.37  | 5.70E-11 | 7.172996 | BST2;CCL2;DDX58;DHX58;EIF2AK2;IFIH1;IFIT1;IFITM3;IRF7;ISG15;MX1;OAS1;OAS3;OASL;PLSCR1;RSAD2;TRII                 |
| lightcyan BP  | GO:0044764  | multi-organism cellular process             | 17735 | 691  | 54 | 17 | 2.38  | 6.00E-11 | 7.142857 | BST2;CCL2;DDX58;DHX58;EIF2AK2;IFIH1;IFIT1;IFITM3;IRF7;ISG15;MX1;OAS1;OAS3;OASL;PLSCR1;RSAD2;TRII                 |
| lightcyan BP  | GO:0071310  | cellular response to organic substance      | 17735 | 1333 | 54 | 22 | 4.58  | 9.00E-11 | 4.803493 | CCL2;CMPK2;CTSL1;EIF2AK2;HERC5;IFI6;IFIT1;IFIT2;IFIT3;IFITM3;IRF7;ISG15;MT2A;MX1;OAS1;OAS2;OAS3;OASL             |
| lightcyan BP  | GO:00050792 | regulation of viral reproduction            | 17735 | 109  | 54 | 9  | 0.37  | 1.00E-10 | 24.32432 | BST2;IFIT1;IFITM3;MX1;OAS1;OAS3;OASL;PLSCR1;RSAD2                                                                |
| lightcyan BP  | GO:0034341  | response to interferon-gamma                | 17735 | 112  | 54 | 9  | 0.39  | 1.30E-10 | 23.07692 | BST2;CCL2;IFITM3;IRF7;MT2A;OAS1;OAS2;OAS3;OASL                                                                   |
| lightcyan BP  | GO:0044703  | multi-organism reproductive process         | 17735 | 730  | 54 | 17 | 2.51  | 1.40E-10 | 6.772908 | BST2;CCL2;DDX58;DHX58;EIF2AK2;IFIH1;IFIT1;IFITM3;IRF7;ISG15;MX1;OAS1;OAS3;OASL;PLSCR1;RSAD2;TRII                 |
| lightcyan BP  | GO:0039528  | cytoplasmic pattern recognition receptor... | 17735 | 11   | 54 | 5  | 0.04  | 1.80E-10 | 125      | DDX58;DDX60;DHX58;IFIH1;IRF7                                                                                     |
| lightcyan BP  | GO:0019058  | viral infectious cycle                      | 17735 | 223  | 54 | 11 | 0.77  | 1.90E-10 | 14.28571 | BST2;CCL2;EIF2AK2;IFIT1;IFITM3;MX1;OAS1;OAS3;OASL;PLSCR1;RSAD2                                                   |
| lightcyan MF  | GO:0003723  | RNA binding                                 | 17735 | 851  | 54 | 17 | 2.65  | 2.70E-10 | 6.415094 | DDX58;DDX60;DDX60L;DHX58;EIF2AK2;EIF3L;IFIH1;IFIT1;IFIT2;IFIT5;OAS1;OAS2;OAS3;OASL;PNPT1;TDRD7;Z                 |
| lightcyan BP  | GO:0035456  | response to interferon-beta                 | 17735 | 14   | 54 | 5  | 0.05  | 7.70E-10 | 100      | BST2;IFITM3;PLSCR1;PNPT1;XAF1                                                                                    |
| lightcyan BP  | GO:0035455  | response to interferon-alpha                | 17735 | 15   | 54 | 5  | 0.05  | 1.10E-09 | 100      | BST2;IFIT2;IFIT3;IFITM3;OAS1                                                                                     |
| lightcyan MF  | GO:0003727  | single-stranded RNA binding                 | 17735 | 41   | 54 | 6  | 0.13  | 2.70E-09 | 46.15385 | DDX58;DDX60;DHX58;IFIH1;IFIT5;PNPT1                                                                              |
| lightcyan BP  | GO:0032479  | regulation of type I interferon producti... | 17735 | 67   | 54 | 7  | 0.23  | 2.70E-09 | 30.43478 | DDX58;DHX58;HERC5;IFIH1;IRF7;ISG15;ZBP1                                                                          |
| lightcyan BP  | GO:0032606  | type I interferon production                | 17735 | 71   | 54 | 7  | 0.24  | 4.10E-09 | 29.16667 | DDX58;DHX58;HERC5;IFIH1;IRF7;ISG15;ZBP1                                                                          |
| lightcyan BP  | GO:0042221  | response to chemical stimulus               | 17735 | 2766 | 54 | 28 | 9.51  | 6.40E-09 | 2.944269 | AGRN;BST2;CCL2;CMPK2;CTSL1;DDX58;EIF2AK2;HERC5;IFI6;IFIT1;IFIT2;IFIT3;IFITM3;IRF7;ISG15;MT2A;MX1;                |
| lightcyan BP  | GO:0070887  | cellular response to chemical stimulus      | 17735 | 1709 | 54 | 22 | 5.88  | 1.00E-08 | 3.741497 | CCL2;CMPK2;CTSL1;EIF2AK2;HERC5;IFI6;IFIT1;IFIT2;IFIT3;IFITM3;IRF7;ISG15;MT2A;MX1;OAS1;OAS2;OAS3;OASL             |
| lightcyan BP  | GO:20000241 | regulation of reproductive process          | 17735 | 201  | 54 | 9  | 0.69  | 2.40E-08 | 13.04348 | BST2;IFIT1;IFITM3;MX1;OAS1;OAS3;OASL;PLSCR1;RSAD2                                                                |
| lightcyan BP  | GO:0071346  | cellular response to interferon-gamma       | 17735 | 94   | 54 | 7  | 0.32  | 3.00E-08 | 21.875   | CCL2;IRF7;MT2A;OAS1;OAS2;OAS3;OASL                                                                               |
| lightcyan BP  | GO:0019048  | virus-host interaction                      | 17735 | 371  | 54 | 11 | 1.28  | 3.90E-08 | 8.59375  | BST2;DDX58;DHX58;EIF2AK2;IFIH1;IFIT1;IFITM3;IRF7;ISG15;RSAD2;TRIM22                                              |
| lightcyan BP  | GO:0001817  | regulation of cytokine production           | 17735 | 382  | 54 | 11 | 1.31  | 5.30E-08 | 8.396947 | BST2;CCL2;DDX58;DDX60;DHX58;HERC5;IFIH1;IRF7;ISG15;RSAD2;ZBP1                                                    |
| lightcyan BP  | GO:0045088  | regulation of innate immune response        | 17735 | 225  | 54 | 9  | 0.77  | 6.30E-08 | 11.68831 | DDX58;DDX60;DHX58;IFIH1;IRF7;PLSCR1;RSAD2;USP18;ZBP1                                                             |
| lightcyan BP  | GO:0032480  | negative regulation of type I interferon... | 17735 | 33   | 54 | 5  | 0.11  | 8.60E-08 | 45.45455 | DDX58;DHX58;HERC5;IFIH1;ISG15                                                                                    |
| lightcyan CC  | GO:0005737  | cytoplasm                                   | 17735 | 9016 | 54 | 46 | 27.98 | 9.30E-08 | 1.644031 | AGRN;BST2;CCL2;CMPK2;CTSL1;DDX58;DDX60;DHX58;EIF2AK2;EIF3L;EXOC3L1;HERC5;HERC6;IFI44;IFI44L;IF                   |
| lightcyan BP  | GO:0051701  | interaction with host                       | 17735 | 411  | 54 | 11 | 1.41  | 1.10E-07 | 7.801418 | BST2;DDX58;DHX58;EIF2AK2;IFIH1;IFIT1;IFITM3;IRF7;ISG15;RSAD2;TRIM22                                              |
| lightcyan BP  | GO:0032481  | positive regulation of type I interferon... | 17735 | 36   | 54 | 5  | 0.12  | 1.40E-07 | 41.66667 | DDX58;DHX58;IFIH1;IRF7;ZBP1                                                                                      |
| lightcyan BP  | GO:0013147  | regulation of defense response              | 17735 | 428  | 54 | 11 | 1.47  | 1.70E-07 | 7.482993 | DDX58;DDX60;DHX58;HERC5;IFIH1;IFIT1;IRF7;PLSCR1;RSAD2;USP18;ZBP1                                                 |
| lightcyan BP  | GO:0001816  | cytokine production                         | 17735 | 430  | 54 | 11 | 1.48  | 1.80E-07 | 7.432432 | BST2;CCL2;DDX58;DDX60;DHX58;HERC5;IFIH1;IRF7;ISG15;RSAD2;ZBP1                                                    |
| lightcyan BP  | GO:0060333  | interferon-gamma-mediated signaling path... | 17735 | 75   | 54 | 6  | 0.26  | 2.00E-07 | 23.07692 | IRF7;MT2A;OAS1;OAS2;OAS3;OASL                                                                                    |
| lightcyan BP  | GO:0002753  | cytoplasmic pattern recognition receptor... | 17735 | 40   | 54 | 5  | 0.14  | 2.40E-07 | 35.71429 | DDX58;DDX60;DHX58;IFIH1;IRF7                                                                                     |
| lightcyan BP  | GO:0044403  | symbiosis, encompassing mutualism throug... | 17735 | 445  | 54 | 11 | 1.53  | 2.50E-07 | 7.189542 | BST2;DDX58;DHX58;EIF2AK2;IFIH1;IFIT1;IFITM3;IRF7;ISG15;RSAD2;TRIM22                                              |
| lightcyan BP  | GO:0044419  | interspecies interaction between organis... | 17735 | 445  | 54 | 11 | 1.53  | 2.50E-07 | 7.189542 | BST2;DDX58;DHX58;EIF2AK2;IFIH1;IFIT1;IFITM3;IRF7;ISG15;RSAD2;TRIM22                                              |
| lightcyan BP  | GO:0002697  | regulation of immune effector process       | 17735 | 217  | 54 | 8  | 0.75  | 6.80E-07 | 10.66667 | BST2;CCL2;DDX58;DDX60;DHX58;HERC5;IFIT1;RSAD2                                                                    |
| lightcyan BP  | GO:0022414  | reproductive process                        | 17735 | 1510 | 54 | 18 | 5.19  | 1.20E-06 | 3.468208 | BST2;CCL2;DDX58;DHX58;EIF2AK2;IFIH1;IFIT1;IFITM3;IRF7;ISG15;MX1;OAS1;OAS3;OASL;PLSCR1;RSAD2;TDF                  |
| lightcyan BP  | GO:0045089  | positive regulation of innate immune res... | 17735 | 167  | 54 | 7  | 0.57  | 1.50E-06 | 12.2807  | DDX58;DDX60;DHX58;IFIH1;IRF7;PLSCR1;RSAD2                                                                        |
| lightcyan BP  | GO:0050896  | response to stimulus                        | 17735 | 6581 | 54 | 39 | 22.63 | 2.30E-06 | 1.723376 | AGRN;BST2;CCL2;CMPK2;CTSL1;DDX58;DDX60;DHX58;EIF2AK2;HERC5;IFI44L;IFI44L;IFI6;IFIH1;IFIT1;IFIT2;IFIT             |
| lightcyan BP  | GO:0000003  | reproduction                                | 17735 | 1591 | 54 | 18 | 5.47  | 2.70E-06 | 3.290676 | BST2;CCL2;DDX58;DHX58;EIF2AK2;IFIH1;IFIT1;IFITM3;IRF7;ISG15;MX1;OAS1;OAS3;OASL;PLSCR1;RSAD2;TDF                  |
| lightcyan BP  | GO:0007166  | cell surface receptor signaling pathway     | 17735 | 2331 | 54 | 22 | 8.02  | 2.70E-06 | 2.743142 | AGRN;CCL2;HERC5;IFI6;IFIT1;IFIT2;IFIT3;IFITM3;IRF7;ISG15;ULRBS1;LY6E;MT2A;MX1;OAS1;OAS2;OAS3;OASL                |
| lightcyan BP  | GO:0050688  | regulation of defense response to virus     | 17735 | 65   | 54 | 5  | 0.22  | 2.80E-06 | 22.72727 | DDX58;DDX60;DHX58;HERC5;IFIT1                                                                                    |
| lightcyan CC  | GO:0005829  | cytosol                                     | 17735 | 2362 | 54 | 21 | 7.33  | 2.90E-06 | 2.864939 | DDX58;EIF2AK2;HERC5;HERC6;IFIH1;IFIT1;IFIT2;IFIT3;IRF7;ISG15;MT2A;MX1;OAS1;OAS2;OAS3;OASL;OTOF;I                 |

|           |    |            |                                             |       |       |    |    |       |          |          |                                                                                                            |
|-----------|----|------------|---------------------------------------------|-------|-------|----|----|-------|----------|----------|------------------------------------------------------------------------------------------------------------|
| lightcyan | BP | GO:0002221 | pattern recognition receptor signaling p... | 17735 | 128   | 54 | 6  | 0.44  | 4.80E-06 | 13.63636 | DDX58;DDX60;DHX58;IFIH1;IRF7;RSAD2                                                                         |
| lightcyan | BP | GO:0001819 | positive regulation of cytokine producti... | 17735 | 202   | 54 | 7  | 0.69  | 5.40E-06 | 10.14493 | DDX58;DDX60;DHX58;IFIH1;IRF7;RSAD2;ZBP1                                                                    |
| lightcyan | BP | GO:0080134 | regulation of response to stress            | 17735 | 737   | 54 | 12 | 2.53  | 5.40E-06 | 4.743083 | DDX58;DDX60;DHX58;HERC5;IFIH1;IFIT1;IRF7;PLSCR1;PNPT1;RSAD2;USP18;ZBP1                                     |
| lightcyan | BP | GO:0002758 | innate immune response-activating signal... | 17735 | 132   | 54 | 6  | 0.45  | 5.70E-06 | 13.33333 | DDX58;DDX60;DHX58;IFIH1;IRF7;RSAD2                                                                         |
| lightcyan | BP | GO:0002682 | regulation of immune system process         | 17735 | 884   | 54 | 13 | 3.04  | 6.10E-06 | 4.276316 | BST2;CCL2;DDX58;DDX60;DHX58;HERC5;IFIH1;IFIT1;IRF7;PLSCR1;RSAD2;USP18;ZBP1                                 |
| lightcyan | BP | GO:0007154 | cell communication                          | 17735 | 4775  | 54 | 32 | 16.42 | 6.10E-06 | 1.948843 | AGRN;BST2;CCL2;DDX58;DDX60;DHX58;EIF2AK2;EXOC3L1;HERC5;IFI6;IFIH1;IFIT1;IFIT2;IFIT3;IFITM3;IRF7;ISC        |
| lightcyan | BP | GO:0032727 | positive regulation of interferon-alpha ... | 17735 | 11    | 54 | 3  | 0.04  | 6.20E-06 | 75       | DDX58;IFIH1;IRF7                                                                                           |
| lightcyan | BP | GO:0001818 | negative regulation of cytokine producti... | 17735 | 135   | 54 | 6  | 0.46  | 6.50E-06 | 13.04348 | BST2;DDX58;DHX58;HERC5;IFIH1;ISG15                                                                         |
| lightcyan | BP | GO:0002218 | activation of innate immune response        | 17735 | 140   | 54 | 6  | 0.48  | 8.00E-06 | 12.5     | DDX58;DDX60;DHX58;IFIH1;IRF7;RSAD2                                                                         |
| lightcyan | BP | GO:0002831 | regulation of response to biotic stimulu... | 17735 | 84    | 54 | 5  | 0.29  | 9.90E-06 | 17.24138 | DDX58;DDX60;DHX58;HERC5;IFIT1                                                                              |
| lightcyan | CC | GO:0044444 | cytoplasmic part                            | 17735 | 6562  | 54 | 36 | 20.37 | 1.10E-05 | 1.767305 | AGRN;BST2;CMPK2;CTSL1;DDX58;EIF2AK2;EIF3L;EXOC3L1;HERC5;HERC6;IFI6;IFIH1;IFIT1;IFIT2;IFIT3;IFITM3;IRF7;ISC |
| lightcyan | BP | GO:0031349 | positive regulation of defense response     | 17735 | 229   | 54 | 7  | 0.79  | 1.20E-05 | 8.860759 | DDX58;DDX60;DHX58;IFIH1;IRF7;PLSCR1;RSAD2                                                                  |
| lightcyan | BP | GO:0007165 | signal transduction                         | 17735 | 4165  | 54 | 29 | 14.32 | 1.30E-05 | 2.02514  | AGRN;BST2;CCL2;DDX58;DDX60;DHX58;EIF2AK2;HERC5;IFI6;IFIH1;IFIT1;IFIT2;IFIT3;IFITM3;IRF7;ISG15;LILRB        |
| lightcyan | BP | GO:0023052 | signaling                                   | 17735 | 4666  | 54 | 31 | 16.04 | 1.30E-05 | 1.932668 | AGRN;BST2;CCL2;DDX58;DDX60;DHX58;EIF2AK2;EXOC3L1;HERC5;IFI6;IFIH1;IFIT1;IFIT2;IFIT3;IFITM3;IRF7;ISC        |
| lightcyan | BP | GO:0044700 | single organism signaling                   | 17735 | 4666  | 54 | 31 | 16.04 | 1.30E-05 | 1.932668 | AGRN;BST2;CCL2;DDX58;DDX60;DHX58;EIF2AK2;EXOC3L1;HERC5;IFI6;IFIH1;IFIT1;IFIT2;IFIT3;IFITM3;IRF7;ISC        |
| lightcyan | BP | GO:0002757 | immune response-activating signal transd... | 17735 | 237   | 54 | 7  | 0.81  | 1.50E-05 | 8.641975 | DDX58;DDX60;DHX58;IFIH1;IRF7;PLSCR1;RSAD2                                                                  |
| lightcyan | BP | GO:0050776 | regulation of immune response               | 17735 | 560   | 54 | 10 | 1.93  | 1.70E-05 | 5.181347 | BST2;DDX58;DDX60;DHX58;IFIH1;IRF7;PLSCR1;RSAD2;USP18;ZBP1                                                  |
| lightcyan | BP | GO:0032607 | interferon-alpha production                 | 17735 | 16    | 54 | 3  | 0.06  | 2.10E-05 | 50       | DDX58;IFIH1;IRF7                                                                                           |
| lightcyan | BP | GO:0032647 | regulation of interferon-alpha productio... | 17735 | 16    | 54 | 3  | 0.06  | 2.10E-05 | 50       | DDX58;IFIH1;IRF7                                                                                           |
| lightcyan | BP | GO:0002764 | immune response-regulating signaling pat... | 17735 | 250   | 54 | 7  | 0.86  | 2.20E-05 | 8.139535 | DDX58;DDX60;DHX58;IFIH1;IRF7;PLSCR1;RSAD2                                                                  |
| lightcyan | BP | GO:0051716 | cellular response to stimulus               | 17735 | 5052  | 54 | 32 | 17.37 | 2.30E-05 | 1.842257 | AGRN;BST2;CCL2;CMPK2;CTSL1;DDX58;DDX60;DHX58;EIF2AK2;HERC5;IFI6;IFIH1;IFIT1;IFIT2;IFIT3;IFITM3;IRF7;ISC    |
| lightcyan | MF | GO:0070566 | adenyltransferase activity                  | 17735 | 19    | 54 | 3  | 0.06  | 2.60E-05 | 50       | OAS1;OAS2;OAS3                                                                                             |
| lightcyan | BP | GO:0032728 | positive regulation of interferon-beta p... | 17735 | 22    | 54 | 3  | 0.08  | 5.60E-05 | 37.5     | DDX58;IFIH1;IRF7                                                                                           |
| lightcyan | CC | GO:0044424 | intracellular part                          | 17735 | 12103 | 54 | 49 | 37.57 | 6.60E-05 | 1.304232 | AGRN;BST2;CCL2;CMPK2;CTSL1;DDX58;DDX60;DHX58;EIF2AK2;EIF3L;EXOC3L1;HERC5;HERC6;IFI44;IFI44L;IF             |
| lightcyan | MF | GO:0004386 | helicase activity                           | 17735 | 143   | 54 | 5  | 0.44  | 7.90E-05 | 11.36364 | DDX58;DDX60;DDX60L;DHX58;IFIH1                                                                             |
| lightcyan | BP | GO:0002253 | activation of immune response               | 17735 | 310   | 54 | 7  | 1.07  | 8.50E-05 | 6.542056 | DDX58;DDX60;DHX58;IFIH1;IRF7;PLSCR1;RSAD2                                                                  |
| lightcyan | BP | GO:0032648 | regulation of interferon-beta production    | 17735 | 30    | 54 | 3  | 0.1   | 0.00015  | 30       | DDX58;IFIH1;IRF7                                                                                           |
| lightcyan | CC | GO:0005622 | intracellular                               | 17735 | 12344 | 54 | 49 | 38.31 | 0.00015  | 1.279039 | AGRN;BST2;CCL2;CMPK2;CTSL1;DDX58;DDX60;DHX58;EIF2AK2;EIF3L;EXOC3L1;HERC5;HERC6;IFI44;IFI44L;IF             |
| lightcyan | BP | GO:0032608 | interferon-beta production                  | 17735 | 32    | 54 | 3  | 0.11  | 0.00018  | 27.27273 | DDX58;IFIH1;IRF7                                                                                           |
| lightcyan | BP | GO:0060338 | regulation of type I interferon-mediated... | 17735 | 33    | 54 | 3  | 0.11  | 0.00019  | 27.27273 | IRF7;USP18;ZBP1                                                                                            |
| lightcyan | BP | GO:0050778 | positive regulation of immune response      | 17735 | 377   | 54 | 7  | 1.3   | 0.00028  | 5.384615 | DDX58;DDX60;DHX58;IFIH1;IRF7;PLSCR1;RSAD2                                                                  |
| lightcyan | BP | GO:0048519 | negative regulation of biological proces... | 17735 | 3150  | 54 | 22 | 10.83 | 0.00034  | 2.031394 | BST2;CCL2;DDX58;DHX58;EIF2AK2;HERC5;IFI6;IFIH1;IFIT1;IFIT3;IFITM3;IRF7;ISG15;MT2A;MX1;OAS1;OAS3;C          |
| lightcyan | BP | GO:0051240 | positive regulation of multicellular org... | 17735 | 524   | 54 | 8  | 1.8   | 0.00038  | 4.444444 | CCL2;DDX58;DDX60;DHX58;IFIH1;IRF7;RSAD2;ZBP1                                                               |
| lightcyan | MF | GO:0003676 | nucleic acid binding                        | 17735 | 3299  | 54 | 21 | 10.26 | 0.00039  | 2.046784 | DDX58;DDX60;DDX60L;DHX58;EIF2AK2;EIF3L;IFIH1;IFIT1;IFIT2;IFIT5;IRF7;OAS1;OAS2;OAS3;OASL;PARP12;PI          |
| lightcyan | MF | GO:0016779 | nucleotidyltransferase activity             | 17735 | 120   | 54 | 4  | 0.37  | 0.00052  | 10.81081 | OAS1;OAS2;OAS3;PNPT1                                                                                       |
| lightcyan | BP | GO:0002684 | positive regulation of immune system pro... | 17735 | 554   | 54 | 8  | 1.9   | 0.00055  | 4.210526 | CCL2;DDX58;DDX60;DHX58;IFIH1;IRF7;PLSCR1;RSAD2                                                             |
| lightcyan | BP | GO:0006925 | inflammatory cell apoptotic process         | 17735 | 14    | 54 | 2  | 0.05  | 0.00103  | 40       | CTSL1;IRF7                                                                                                 |
| lightcyan | MF | GO:0005524 | ATP binding                                 | 17735 | 1462  | 54 | 12 | 4.55  | 0.00135  | 2.637363 | CMPK2;DDX58;DDX60;DDX60L;DHX58;EIF2AK2;IFIH1;OAS1;OAS2;OAS3;OASL;TOR1E                                     |
| lightcyan | BP | GO:0051241 | negative regulation of multicellular org... | 17735 | 359   | 54 | 6  | 1.23  | 0.00138  | 4.878049 | BST2;DDX58;DHX58;HERC5;IFIH1;ISG15                                                                         |
| lightcyan | BP | GO:0030522 | intracellular receptor mediated signalin... | 17735 | 242   | 54 | 5  | 0.83  | 0.00141  | 6.024096 | DDX58;DDX60;DHX58;IFIH1;IRF7                                                                               |
| lightcyan | MF | GO:0032559 | adenyl ribonucleotide binding               | 17735 | 1491  | 54 | 12 | 4.64  | 0.0016   | 2.586207 | CMPK2;DDX58;DDX60;DDX60L;DHX58;EIF2AK2;IFIH1;OAS1;OAS2;OAS3;OASL;TOR1E                                     |
| lightcyan | MF | GO:0030554 | adenyl nucleotide binding                   | 17735 | 1495  | 54 | 12 | 4.65  | 0.00164  | 2.586645 | CMPK2;DDX58;DDX60;DDX60L;DHX58;EIF2AK2;IFIH1;OAS1;OAS2;OAS3;OASL;TOR1E                                     |
| lightcyan | BP | GO:0001961 | positive regulation of cytokine-mediated... | 17735 | 19    | 54 | 2  | 0.07  | 0.00191  | 28.57143 | IRF7;ZBP1                                                                                                  |
| lightcyan | BP | GO:0032069 | regulation of nuclease activity             | 17735 | 72    | 54 | 3  | 0.25  | 0.00193  | 12       | CCL2;OAS1;OAS3                                                                                             |
| lightcyan | BP | GO:0060760 | positive regulation of response to cytot... | 17735 | 20    | 54 | 2  | 0.07  | 0.00212  | 28.57143 | IRF7;ZBP1                                                                                                  |
| lightcyan | BP | GO:0043330 | response to exogenous dsRNA                 | 17735 | 21    | 54 | 2  | 0.07  | 0.00233  | 28.57143 | DDX58;IFIT1                                                                                                |
| lightcyan | MF | GO:0035639 | purine ribonucleoside triphosphate bindi... | 17735 | 1796  | 54 | 13 | 5.58  | 0.00258  | 2.329749 | CMPK2;DDX58;DDX60;DDX60L;DHX58;EIF2AK2;IFIH1;MX1;OAS1;OAS2;OAS3;OASL;TOR1E                                 |
| lightcyan | MF | GO:0032550 | purine ribonucleoside binding               | 17735 | 1805  | 54 | 13 | 5.61  | 0.00269  | 2.317291 | CMPK2;DDX58;DDX60;DDX60L;DHX58;EIF2AK2;IFIH1;MX1;OAS1;OAS2;OAS3;OASL;TOR1E                                 |
| lightcyan | MF | GO:0001883 | purine nucleoside binding                   | 17735 | 1807  | 54 | 13 | 5.62  | 0.00272  | 2.313167 | CMPK2;DDX58;DDX60;DDX60L;DHX58;EIF2AK2;IFIH1;MX1;OAS1;OAS2;OAS3;OASL;TOR1E                                 |
| lightcyan | BP | GO:0032549 | ribonucleoside binding                      | 17735 | 1809  | 54 | 13 | 5.63  | 0.00275  | 2.309059 | CMPK2;DDX58;DDX60;DDX60L;DHX58;EIF2AK2;IFIH1;MX1;OAS1;OAS2;OAS3;OASL;TOR1E                                 |
| lightcyan | BP | GO:0050691 | regulation of defense response to virus ... | 17735 | 23    | 54 | 2  | 0.08  | 0.0028   | 25       | DDX58;IFIT1                                                                                                |
| lightcyan | MF | GO:0001882 | nucleoside binding                          | 17735 | 1818  | 54 | 13 | 5.65  | 0.00287  | 2.300885 | CMPK2;DDX58;DDX60;DDX60L;DHX58;EIF2AK2;IFIH1;MX1;OAS1;OAS2;OAS3;OASL;TOR1E                                 |
| lightcyan | BP | GO:0001959 | regulation of cytokine-mediated signalin... | 17735 | 84    | 54 | 3  | 0.29  | 0.003    | 10.34483 | IRF7;USP18;ZBP1                                                                                            |
| lightcyan | BP | GO:0043903 | regulation of symbiosis, encompassing mu... | 17735 | 24    | 54 | 2  | 0.08  | 0.00305  | 25       | BST2;IFITM3                                                                                                |
| lightcyan | MF | GO:0032555 | purine ribonucleotide binding               | 17735 | 1831  | 54 | 13 | 5.69  | 0.00306  | 2.28471  | CMPK2;DDX58;DDX60;DDX60L;DHX58;EIF2AK2;IFIH1;MX1;OAS1;OAS2;OAS3;OASL;TOR1E                                 |
| lightcyan | BP | GO:0002683 | negative regulation of immune system pro... | 17735 | 176   | 54 | 4  | 0.61  | 0.0031   | 6.557377 | BST2;CCL2;DHX58;IFIT1                                                                                      |
| lightcyan | MF | GO:0017076 | purine nucleotide binding                   | 17735 | 1836  | 54 | 13 | 5.71  | 0.00313  | 2.276708 | CMPK2;DDX58;DDX60;DDX60L;DHX58;EIF2AK2;IFIH1;MX1;OAS1;OAS2;OAS3;OASL;TOR1E                                 |
| lightcyan | MF | GO:0032553 | ribonucleotide binding                      | 17735 | 1846  | 54 | 13 | 5.74  | 0.00329  | 2.264808 | CMPK2;DDX58;DDX60;DDX60L;DHX58;EIF2AK2;IFIH1;MX1;OAS1;OAS2;OAS3;OASL;TOR1E                                 |
| lightcyan | BP | GO:0044763 | single-organism cellular process            | 17735 | 9577  | 54 | 42 | 32.93 | 0.00355  | 1.275433 | AGRN;BST2;CCL2;CMPK2;CTSL1;DDX58;DDX60;DHX58;EIF2AK2;EIF3L;EXOC3L1;HERC5;IFI6;IFIH1;IFIT1;IFIT2;           |
| lightcyan | BP | GO:0060759 | regulation of response to cytokine stimu... | 17735 | 90    | 54 | 3  | 0.31  | 0.00364  | 9.677419 | IRF7;USP18;ZBP1                                                                                            |
| lightcyan | MF | GO:0043168 | anion binding                               | 17735 | 2346  | 54 | 15 | 7.29  | 0.00378  | 2.057613 | AGRN;CCL2;CMPK2;DDX58;DDX60;DDX60L;DHX58;EIF2AK2;IFIH1;MX1;OAS1;OAS2;OAS3;OASL;TOR1E                       |
| lightcyan | BP | GO:0034121 | regulation of toll-like receptor signali... | 17735 | 27    | 54 | 2  | 0.09  | 0.00385  | 22.22222 | IRF7;RSAD2                                                                                                 |
| lightcyan | BP | GO:0044766 | multi-organism transport                    | 17735 | 27    | 54 | 2  | 0.09  | 0.00385  | 22.22222 | BST2;IFIT1                                                                                                 |
| lightcyan | CC | GO:0044464 | cell part                                   | 17735 | 14451 | 54 | 51 | 44.85 | 0.00422  | 1.137124 | AGRN;BST2;CCL2;CMPK2;CTSL1;DDX58;DDX60;DHX58;EIF2AK2;EIF3L;EXOC3L1;HERC5;HERC6;IFI44;IFI44L;IF             |
| lightcyan | CC | GO:0005623 | cell                                        | 17735 | 14452 | 54 | 51 | 44.86 | 0.00423  | 1.13687  | AGRN;BST2;CCL2;CMPK2;CTSL1;DDX58;DDX60;DHX58;EIF2AK2;EIF3L;EXOC3L1;HERC5;HERC6;IFI44;IFI44L;IF             |
| lightcyan | MF | GO:0008026 | ATP-dependent helicase activity             | 17735 | 106   | 54 | 3  | 0.33  | 0.00435  | 9.090909 | DDX58;DDX60                                                                                                |
| lightcyan | MF | GO:0070035 | purine NTP-dependent helicase activity      | 17735 | 106   | 54 | 3  | 0.33  | 0.00435  | 9.090909 | DDX58;DDX60;DDX60L                                                                                         |
| lightcyan | BP | GO:0070206 | protein trimerization                       | 17735 | 30    | 54 | 2  | 0.1   | 0.00474  | 20       | PNPT1;TRIM22                                                                                               |
| lightcyan | BP | GO:0048584 | positive regulation of response to stimu... | 17735 | 1164  | 54 | 10 | 4     | 0.00557  | 2.5      | BST2;CCL2;DDX58;DDX60;DHX58;IFIH1;IRF7;PLSCR1;RSAD2;ZBP1                                                   |

|           |    |            |                                              |       |       |    |    |       |         |          |                                                                                                  |
|-----------|----|------------|----------------------------------------------|-------|-------|----|----|-------|---------|----------|--------------------------------------------------------------------------------------------------|
| lightcyan | BP | GO:0006915 | apoptotic process                            | 17735 | 1562  | 54 | 12 | 5.37  | 0.00567 | 2.234637 | CCL2;CTSL1;EIF2AK2;IFI6;IFIH1;IFIT2;IFIT3;IRF7;MX1;PLSCR1;TRIM69;XAF1                            |
| lightcyan | BP | GO:0032091 | negative regulation of protein binding       | 17735 | 34    | 54 | 2  | 0.12  | 0.00606 | 16.66667 | IFIT1;IFIT2                                                                                      |
| lightcyan | BP | GO:0012501 | programmed cell death                        | 17735 | 1575  | 54 | 12 | 5.42  | 0.00606 | 2.214022 | CCL2;CTSL1;EIF2AK2;IFI6;IFIH1;IFIT2;IFIT3;IRF7;MX1;PLSCR1;TRIM69;XAF1                            |
| lightcyan | BP | GO:0043331 | response to dsRNA                            | 17735 | 38    | 54 | 2  | 0.13  | 0.00753 | 15.38462 | DDX58;IFIT1                                                                                      |
| lightcyan | CC | GO:0044437 | vacuolar part                                | 17735 | 252   | 54 | 4  | 0.78  | 0.00769 | 5.128205 | AGRN;CTSL1;IFITM3;LAMP3                                                                          |
| lightcyan | MF | GO:0017111 | nucleoside-triphosphatase activity           | 17735 | 756   | 54 | 7  | 2.35  | 0.00835 | 2.978723 | DDX58;DDX60;DDX60L;DHX58;IFIH1;MX1;TOR1B                                                         |
| lightcyan | BP | GO:0002718 | regulation of cytokine production involv...  | 17735 | 41    | 54 | 2  | 0.14  | 0.00872 | 14.28571 | BST2;RSAD2                                                                                       |
| lightcyan | BP | GO:0048583 | regulation of response to stimulus           | 17735 | 2347  | 54 | 15 | 8.07  | 0.01028 | 1.858736 | AGRN;BST2;CCL2;DDX58;DDX60;DHX58;HERCS;IFIH1;IFIT1;IRF7;PLSCR1;PNPT1;RSAD2;USP18;ZBP1            |
| lightcyan | MF | GO:0016462 | pyrophosphatase activity                     | 17735 | 791   | 54 | 7  | 2.46  | 0.01058 | 2.845528 | DDX58;DDX60;DDX60L;DHX58;IFIH1;MX1;TOR1B                                                         |
| lightcyan | BP | GO:0006986 | response to unfolded protein                 | 17735 | 133   | 54 | 3  | 0.46  | 0.01072 | 6.521739 | CCL2;EIF2AK2;TOR1B                                                                               |
| lightcyan | MF | GO:0016818 | hydrolase activity, acting on acid anhyd...  | 17735 | 793   | 54 | 7  | 2.47  | 0.01072 | 2.834008 | DDX58;DDX60;DDX60L;DHX58;IFIH1;MX1;TOR1B                                                         |
| lightcyan | MF | GO:0016817 | hydrolase activity, acting on acid anhyd...  | 17735 | 797   | 54 | 7  | 2.48  | 0.011   | 2.822581 | DDX58;DDX60;DDX60L;DHX58;IFIH1;MX1;TOR1B                                                         |
| lightcyan | BP | GO:0043632 | modification-dependent macromolecule cat...  | 17735 | 395   | 54 | 5  | 1.36  | 0.01121 | 3.676471 | HERCS;HERC6;ISG15;PNPT1;USP18                                                                    |
| lightcyan | BP | GO:0002367 | cytokine production involved in immune r...  | 17735 | 47    | 54 | 2  | 0.16  | 0.01135 | 12.5     | BST2;RSAD2                                                                                       |
| lightcyan | MF | GO:0043167 | ion binding                                  | 17735 | 5761  | 54 | 26 | 17.91 | 0.01221 | 1.451703 | AGRN;CCL2;CMPK2;DDX58;DDX60;DDX60L;DHX58;EIF2AK2;IFIH1;MT2A;MX1;OAS1;OAS2;OAS3;OASL;OTOF         |
| lightcyan | BP | GO:0035966 | response to topologically incorrect prot...  | 17735 | 140   | 54 | 3  | 0.48  | 0.01231 | 6.25     | CCL2;EIF2AK2;TOR1B                                                                               |
| lightcyan | BP | GO:0048523 | negative regulation of cellular process      | 17735 | 2883  | 54 | 17 | 9.91  | 0.01314 | 1.715439 | BST2;CCL2;DHX58;EIF2AK2;IFI6;IFIT1;IFIT3;IFITM3;IRF7;MX1;OAS1;OAS3;OASL;PLSCR1;PNPT1;RSAD2;SAMD  |
| lightcyan | BP | GO:0008219 | cell death                                   | 17735 | 1741  | 54 | 12 | 5.99  | 0.01315 | 2.003339 | CCL2;CTSL1;EIF2AK2;IFI6;IFIH1;IFIT2;IFIT3;IRF7;MX1;PLSCR1;TRIM69;XAF1                            |
| lightcyan | BP | GO:0016265 | death                                        | 17735 | 1743  | 54 | 12 | 5.99  | 0.01327 | 2.003339 | CCL2;CTSL1;EIF2AK2;IFI6;IFIH1;IFIT2;IFIT3;IRF7;MX1;PLSCR1;TRIM69;XAF1                            |
| lightcyan | BP | GO:0051336 | regulation of hydrolase activity             | 17735 | 755   | 54 | 7  | 2.6   | 0.01411 | 2.692308 | AGRN;CCL2;IFI6;IFIT1;OAS1;OAS3;PLSCR1                                                            |
| lightcyan | BP | GO:0002698 | negative regulation of immune effector p...  | 17735 | 53    | 54 | 2  | 0.18  | 0.01428 | 11.11111 | BST2;IFIT1                                                                                       |
| lightcyan | BP | GO:0040013 | negative regulation of locomotion            | 17735 | 148   | 54 | 3  | 0.51  | 0.01428 | 5.882353 | BST2;CCL2;IFITM3                                                                                 |
| lightcyan | CC | GO:0032587 | ruffle membrane                              | 17735 | 59    | 54 | 2  | 0.18  | 0.01444 | 11.11111 | DDX58;IFIT5                                                                                      |
| lightcyan | MF | GO:0008270 | zinc ion binding                             | 17735 | 1977  | 54 | 12 | 6.15  | 0.01558 | 1.95122  | DDX58;IFIH1;MT2A;OAS1;OAS2;PARP12;PHF11;TRIM22;TRIM69;XAF1;ZCCHC2                                |
| lightcyan | BP | GO:0071887 | leukocyte apoptotic process                  | 17735 | 57    | 54 | 2  | 0.2   | 0.0164  | 10       | CTSL1;IRF7                                                                                       |
| lightcyan | BP | GO:0051239 | regulation of multicellular organismal p...  | 17735 | 1804  | 54 | 12 | 6.2   | 0.01712 | 1.935484 | AGRN;BST2;CCL2;DDX58;DDX60;DHX58;HERCS;IFIH1;IRF7;ISG15;RSAD2;ZBP1                               |
| lightcyan | MF | GO:1901363 | heterocyclic compound binding                | 17735 | 5302  | 54 | 24 | 16.49 | 0.01749 | 1.455428 | CMPK2;DDX58;DDX60;DDX60L;DHX58;EIF2AK2;EIF3L;IFIH1;IFIT1;IFIT2;IFIT5;IRF7;MX1;OAS1;OAS2;OAS3;OA  |
| lightcyan | BP | GO:0042787 | protein ubiquitination involved in ubiqu...  | 17735 | 60    | 54 | 2  | 0.21  | 0.01807 | 9.52381  | HERCS;HERC6                                                                                      |
| lightcyan | MF | GO:0001772 | transferase activity, transferring phosph... | 17735 | 889   | 54 | 7  | 2.76  | 0.0191  | 2.536232 | CCL2;CMPK2;EIF2AK2;OAS1;OAS2;OAS3;PNPT1                                                          |
| lightcyan | BP | GO:0008637 | apoptotic mitochondrial changes              | 17735 | 64    | 54 | 2  | 0.22  | 0.0204  | 9.090909 | IFI6;IFIT2                                                                                       |
| lightcyan | CC | GO:0000323 | lytic vacuole                                | 17735 | 337   | 54 | 4  | 1.05  | 0.02042 | 3.809524 | AGRN;CTSL1;IFITM3;LAMP3                                                                          |
| lightcyan | CC | GO:0005764 | lysosome                                     | 17735 | 337   | 54 | 4  | 1.05  | 0.02042 | 3.809524 | AGRN;CTSL1;IFITM3;LAMP3                                                                          |
| lightcyan | CC | GO:0043202 | lysosomal lumen                              | 17735 | 71    | 54 | 2  | 0.22  | 0.02049 | 9.090909 | AGRN;CTSL1                                                                                       |
| lightcyan | MF | GO:0097159 | organic cyclic compound binding              | 17735 | 5372  | 54 | 24 | 16.7  | 0.02067 | 1.437126 | CMPK2;DDX58;DDX60;DDX60L;DHX58;EIF2AK2;EIF3L;IFIH1;IFIT1;IFIT2;IFIT5;IRF7;MX1;OAS1;OAS2;OAS3;OA  |
| lightcyan | BP | GO:0002700 | regulation of production of molecular me...  | 17735 | 65    | 54 | 2  | 0.22  | 0.021   | 9.090909 | BST2;RSAD2                                                                                       |
| lightcyan | CC | GO:0005775 | vacuolar lumen                               | 17735 | 75    | 54 | 2  | 0.23  | 0.0227  | 8.695652 | AGRN;CTSL1                                                                                       |
| lightcyan | BP | GO:0051098 | regulation of binding                        | 17735 | 178   | 54 | 3  | 0.61  | 0.02322 | 4.918033 | IFIT1;IFIT2;PLSCR1                                                                               |
| lightcyan | BP | GO:0044699 | single-organism process                      | 17735 | 10656 | 54 | 43 | 36.64 | 0.02501 | 1.173581 | AGRN;BST2;CCL2;CMPK2;CTSL1;DDX58;DDX60;DHX58;EIF2AK2;EIF3L;EXOC3L1;HERCS;IFI6;IFIH1;IFIT1;IFIT2; |
| lightcyan | BP | GO:0023056 | positive regulation of signaling             | 17735 | 856   | 54 | 7  | 2.94  | 0.02619 | 2.380952 | BST2;CCL2;DDX60;DHX58;IRF7;RSAD2;ZBP1                                                            |
| lightcyan | BP | GO:0010647 | positive regulation of cell communicatio...  | 17735 | 858   | 54 | 7  | 2.95  | 0.02649 | 2.372881 | BST2;CCL2;DDX60;DHX58;IRF7;RSAD2;ZBP1                                                            |
| lightcyan | MF | GO:0000166 | nucleotide binding                           | 17735 | 2385  | 54 | 13 | 7.42  | 0.02671 | 1.752022 | CMPK2;DDX58;DDX60;DDX60L;DHX58;EIF2AK2;IFIH1;MX1;OAS1;OAS2;OAS3;OASL;TOR1E                       |
| lightcyan | MF | GO:1901265 | nucleoside phosphate binding                 | 17735 | 2386  | 54 | 13 | 7.42  | 0.02679 | 1.752022 | CMPK2;DDX58;DDX60;DDX60L;DHX58;EIF2AK2;IFIH1;MX1;OAS1;OAS2;OAS3;OASL;TOR1E                       |
| lightcyan | BP | GO:0051100 | negative regulation of binding               | 17735 | 75    | 54 | 2  | 0.26  | 0.02742 | 7.692308 | IFIT1;IFIT2                                                                                      |
| lightcyan | BP | GO:0045926 | negative regulation of growth                | 17735 | 190   | 54 | 3  | 0.65  | 0.02747 | 4.615385 | BST2;MT2A;PNPT1                                                                                  |
| lightcyan | BP | GO:0051259 | protein oligomerization                      | 17735 | 338   | 54 | 4  | 1.16  | 0.02857 | 3.448276 | OAS1;PNPT1;TOR1B;TRIM22                                                                          |
| lightcyan | BP | GO:0048524 | positive regulation of viral reproductio...  | 17735 | 79    | 54 | 2  | 0.27  | 0.03018 | 7.407407 | IFIT1;IFITM3                                                                                     |
| lightcyan | BP | GO:0009057 | macromolecule catabolic process              | 17735 | 883   | 54 | 7  | 3.04  | 0.03036 | 2.302632 | AGRN;HERCS;HERC6;ISG15;OAS2;PNPT1;USP18                                                          |
| lightcyan | MF | GO:0043566 | structure-specific DNA binding               | 17735 | 219   | 54 | 3  | 0.68  | 0.0305  | 4.411765 | DDX58;DDX60;ZBP1                                                                                 |
| lightcyan | CC | GO:0000145 | exocyst                                      | 17735 | 10    | 54 | 1  | 0.03  | 0.03062 | 33.33333 | EXOC3L1                                                                                          |
| lightcyan | MF | GO:0004000 | adenosine deaminase activity                 | 17735 | 10    | 54 | 1  | 0.03  | 0.03067 | 33.33333 | ZBP1                                                                                             |
| lightcyan | BP | GO:0044265 | cellular macromolecule catabolic process     | 17735 | 698   | 54 | 6  | 2.4   | 0.03162 | 2.5      | HERCS;HERC6;ISG15;OAS2;PNPT1;USP18                                                               |
| lightcyan | MF | GO:0003824 | catalytic activity                           | 17735 | 5264  | 54 | 23 | 16.37 | 0.03205 | 1.405009 | CCL2;CMPK2;CTSL1;DDX58;DDX60;DDX60L;DHX58;EIF2AK2;HERCS;HERC6;IFIH1;MX1;OAS1;OAS2;OAS3;PAR       |
| lightcyan | BP | GO:0031348 | negative regulation of defense response      | 17735 | 82    | 54 | 2  | 0.28  | 0.03232 | 7.142857 | DHX58;IFIT1                                                                                      |
| lightcyan | BP | GO:0043902 | positive regulation of multi-organism pr...  | 17735 | 83    | 54 | 2  | 0.29  | 0.03304 | 6.896552 | IFIT1;IFITM3                                                                                     |
| lightcyan | CC | GO:0031904 | endosome lumen                               | 17735 | 11    | 54 | 1  | 0.03  | 0.03363 | 33.33333 | CTSL1                                                                                            |
| lightcyan | CC | GO:0042599 | lamellar body                                | 17735 | 11    | 54 | 1  | 0.03  | 0.03363 | 33.33333 | LAMP3                                                                                            |
| lightcyan | BP | GO:0051085 | chaperone mediated protein folding requi...  | 17735 | 10    | 54 | 1  | 0.03  | 0.03387 | 33.33333 | TOR1B                                                                                            |
| lightcyan | BP | GO:0051770 | positive regulation of nitric-oxide synt...  | 17735 | 10    | 54 | 1  | 0.03  | 0.03387 | 33.33333 | CCL2                                                                                             |
| lightcyan | BP | GO:0051900 | regulation of mitochondrial depolarizati...  | 17735 | 10    | 54 | 1  | 0.03  | 0.03387 | 33.33333 | IFI6                                                                                             |
| lightcyan | BP | GO:0071622 | regulation of granulocyte chemotaxis         | 17735 | 10    | 54 | 1  | 0.03  | 0.03387 | 33.33333 | CCL2                                                                                             |
| lightcyan | BP | GO:0071675 | regulation of mononuclear cell migration     | 17735 | 10    | 54 | 1  | 0.03  | 0.03387 | 33.33333 | CCL2                                                                                             |
| lightcyan | BP | GO:0097067 | cellular response to thyroid hormone sti...  | 17735 | 10    | 54 | 1  | 0.03  | 0.03387 | 33.33333 | CTSL1                                                                                            |
| lightcyan | BP | GO:2000772 | regulation of cellular senescence            | 17735 | 10    | 54 | 1  | 0.03  | 0.03387 | 33.33333 | PNPT1                                                                                            |
| lightcyan | BP | GO:0030968 | endoplasmic reticulum unfolded protein r...  | 17735 | 86    | 54 | 2  | 0.3   | 0.03526 | 6.666667 | CCL2;EIF2AK2                                                                                     |
| lightcyan | MF | GO:0046914 | transition metal ion binding                 | 17735 | 2217  | 54 | 12 | 6.89  | 0.03526 | 1.741655 | DDX58;DHX58;IFIH1;MT2A;OAS1;OAS2;PARP12;PHF11;TRIM22;TRIM69;XAF1;ZCCHC2                          |
| lightcyan | CC | GO:0005773 | vacuole                                      | 17735 | 402   | 54 | 4  | 1.25  | 0.03584 | 3.2      | AGRN;CTSL1;IFITM3;LAMP3                                                                          |
| lightcyan | BP | GO:0002250 | adaptive immune response                     | 17735 | 211   | 54 | 3  | 0.73  | 0.03585 | 4.109589 | CTSL1;IRF7;RSAD2                                                                                 |
| lightcyan | BP | GO:0034620 | cellular response to unfolded protein        | 17735 | 87    | 54 | 2  | 0.3   | 0.03601 | 6.666667 | CCL2;EIF2AK2                                                                                     |
| lightcyan | MF | GO:0008191 | metalloendopeptidase inhibitor activity      | 17735 | 12    | 54 | 1  | 0.04  | 0.0367  | 25       | BST2                                                                                             |

|           |    |            |                                             |       |      |    |    |       |          |          |                                                                                                             |
|-----------|----|------------|---------------------------------------------|-------|------|----|----|-------|----------|----------|-------------------------------------------------------------------------------------------------------------|
| lightcyan | MF | GO:0048551 | metalloenzyme inhibitor activity            | 17735 | 12   | 54 | 1  | 0.04  | 0.0367   | 25       | BST2                                                                                                        |
| lightcyan | CC | GO:0031256 | leading edge membrane                       | 17735 | 98   | 54 | 2  | 0.3   | 0.03717  | 6.666667 | DDX58;IFIT5                                                                                                 |
| lightcyan | BP | GO:0006878 | cellular copper ion homeostasis             | 17735 | 11   | 54 | 1  | 0.04  | 0.03719  | 25       | MT2A                                                                                                        |
| lightcyan | BP | GO:0007213 | G-protein coupled acetylcholine receptor... | 17735 | 11   | 54 | 1  | 0.04  | 0.03719  | 25       | AGRN                                                                                                        |
| lightcyan | BP | GO:0009263 | deoxyribonucleotide biosynthetic process    | 17735 | 11   | 54 | 1  | 0.04  | 0.03719  | 25       | CMPK2                                                                                                       |
| lightcyan | BP | GO:0034123 | positive regulation of toll-like recepto... | 17735 | 11   | 54 | 1  | 0.04  | 0.03719  | 25       | RSAD2                                                                                                       |
| lightcyan | BP | GO:0035082 | axoneme assembly                            | 17735 | 11   | 54 | 1  | 0.04  | 0.03719  | 25       | RSPH9                                                                                                       |
| lightcyan | BP | GO:0045351 | type I interferon biosynthetic process      | 17735 | 11   | 54 | 1  | 0.04  | 0.03719  | 25       | IRF7                                                                                                        |
| lightcyan | BP | GO:0051882 | mitochondrial depolarization                | 17735 | 11   | 54 | 1  | 0.04  | 0.03719  | 25       | IF16                                                                                                        |
| lightcyan | BP | GO:0070584 | mitochondrion morphogenesis                 | 17735 | 11   | 54 | 1  | 0.04  | 0.03719  | 25       | PNPT1                                                                                                       |
| lightcyan | BP | GO:0071294 | cellular response to zinc ion               | 17735 | 11   | 54 | 1  | 0.04  | 0.03719  | 25       | MT2A                                                                                                        |
| lightcyan | MF | GO:0000982 | RNA polymerase II core promoter proximal... | 17735 | 98   | 54 | 2  | 0.3   | 0.03724  | 6.666667 | IRF7;PLSCR1                                                                                                 |
| lightcyan | CC | GO:0005739 | mitochondrion                               | 17735 | 1488 | 54 | 9  | 4.62  | 0.03798  | 1.948052 | CMPK2;IF16;IFIT3;OAS1;OAS2;PNPT1;RSAD2;TDRD7;XAF1                                                           |
| lightcyan | BP | GO:0002819 | regulation of adaptive immune response      | 17735 | 91   | 54 | 2  | 0.31  | 0.03908  | 6.451613 | IRF7;RSAD2                                                                                                  |
| lightcyan | CC | GO:0043186 | P granule                                   | 17735 | 13   | 54 | 1  | 0.04  | 0.03962  | 25       | TDRD7                                                                                                       |
| lightcyan | CC | GO:0045495 | pole plasm                                  | 17735 | 13   | 54 | 1  | 0.04  | 0.03962  | 25       | TDRD7                                                                                                       |
| lightcyan | CC | GO:0060293 | germ plasm                                  | 17735 | 13   | 54 | 1  | 0.04  | 0.03962  | 25       | TDRD7                                                                                                       |
| lightcyan | MF | GO:0010576 | metalloenzyme regulator activity            | 17735 | 13   | 54 | 1  | 0.04  | 0.03969  | 25       | BST2                                                                                                        |
| lightcyan | BP | GO:0035967 | cellular response to topologically incor... | 17735 | 92   | 54 | 2  | 0.32  | 0.03986  | 6.25     | CCL2;EIF2AK2                                                                                                |
| lightcyan | MF | GO:0036094 | small molecule binding                      | 17735 | 2525 | 54 | 13 | 7.85  | 0.04048  | 1.656051 | CMPK2;DDX58;DDX60;DDX58;EIF2AK2;IFIH1;MX1;OAS1;OAS2;OAS3;OASL;TOR1E                                         |
| lightcyan | BP | GO:0002701 | negative regulation of production of mol... | 17735 | 12   | 54 | 1  | 0.04  | 0.04051  | 25       | BST2                                                                                                        |
| lightcyan | BP | GO:0002719 | negative regulation of cytokine producti... | 17735 | 12   | 54 | 1  | 0.04  | 0.04051  | 25       | BST2                                                                                                        |
| lightcyan | BP | GO:0002832 | negative regulation of response to bioti... | 17735 | 12   | 54 | 1  | 0.04  | 0.04051  | 25       | IFIT1                                                                                                       |
| lightcyan | BP | GO:0045824 | negative regulation of innate immune res... | 17735 | 12   | 54 | 1  | 0.04  | 0.04051  | 25       | DHX58                                                                                                       |
| lightcyan | BP | GO:0046788 | egress of virus within host cell            | 17735 | 12   | 54 | 1  | 0.04  | 0.04051  | 25       | BST2                                                                                                        |
| lightcyan | BP | GO:0050913 | sensory perception of bitter taste          | 17735 | 12   | 54 | 1  | 0.04  | 0.04051  | 25       | RTP4                                                                                                        |
| lightcyan | BP | GO:0071621 | granulocyte chemotaxis                      | 17735 | 12   | 54 | 1  | 0.04  | 0.04051  | 25       | CCL2                                                                                                        |
| lightcyan | BP | GO:0071674 | mononuclear cell migration                  | 17735 | 12   | 54 | 1  | 0.04  | 0.04051  | 25       | CCL2                                                                                                        |
| lightcyan | BP | GO:0071222 | cellular response to lipopolysaccharide     | 17735 | 93   | 54 | 2  | 0.32  | 0.04065  | 6.25     | CCL2;CMPK2                                                                                                  |
| lightcyan | BP | GO:0050794 | regulation of cellular process              | 17735 | 7700 | 54 | 33 | 26.48 | 0.04266  | 1.246224 | AGRN;BST2;CCL2;DDX58;DDX60;DHX58;EIF2AK2;HERCS;IF16;IFIH1;IFIT1;IFIT2;IFIT3;IFITM3;IRF7;ISG15;LILRB         |
| lightcyan | MF | GO:0043395 | heparan sulfate proteoglycan binding        | 17735 | 14   | 54 | 1  | 0.04  | 0.04268  | 25       | AGRN                                                                                                        |
| lightcyan | MF | GO:0048020 | CCR chemokine receptor binding              | 17735 | 14   | 54 | 1  | 0.04  | 0.04268  | 25       | CCL2                                                                                                        |
| lightcyan | MF | GO:0070717 | poly-purine tract binding                   | 17735 | 14   | 54 | 1  | 0.04  | 0.04268  | 25       | PNPT1                                                                                                       |
| lightcyan | BP | GO:0065007 | biological regulation                       | 17735 | 8616 | 54 | 36 | 29.63 | 0.04303  | 1.214985 | AGRN;BST2;CCL2;DDX58;DDX60;DHX58;EIF2AK2;EXOC3L1;HERCS;IF16;IFIH1;IFIT1;IFIT2;IFIT3;IFITM3;IRF7;ISG15;LILRB |
| lightcyan | BP | GO:0043393 | regulation of protein binding               | 17735 | 96   | 54 | 2  | 0.33  | 0.04305  | 6.060606 | IFIT1;IFIT2                                                                                                 |
| lightcyan | MF | GO:0046872 | metal ion binding                           | 17735 | 3936 | 54 | 18 | 12.24 | 0.04375  | 1.470588 | AGRN;DDX58;DHX58;IFIH1;MT2A;OAS1;OAS2;OAS3;OTOF;PARP12;PHF11;PLSCR1;RSAD2;RUFY4;TRIM22;TR                   |
| lightcyan | BP | GO:0002724 | regulation of T cell cytokine production    | 17735 | 13   | 54 | 1  | 0.04  | 0.04381  | 25       | RSAD2                                                                                                       |
| lightcyan | BP | GO:0008347 | glial cell migration                        | 17735 | 13   | 54 | 1  | 0.04  | 0.04381  | 25       | CCL2                                                                                                        |
| lightcyan | BP | GO:0051767 | nitric-oxide synthase biosynthetic proce... | 17735 | 13   | 54 | 1  | 0.04  | 0.04381  | 25       | CCL2                                                                                                        |
| lightcyan | BP | GO:0051769 | regulation of nitric-oxide synthase bios... | 17735 | 13   | 54 | 1  | 0.04  | 0.04381  | 25       | CCL2                                                                                                        |
| lightcyan | BP | GO:0070207 | protein homotrimerization                   | 17735 | 13   | 54 | 1  | 0.04  | 0.04381  | 25       | PNPT1                                                                                                       |
| lightcyan | BP | GO:0097066 | response to thyroid hormone stimulus        | 17735 | 13   | 54 | 1  | 0.04  | 0.04381  | 25       | CTSL1                                                                                                       |
| lightcyan | BP | GO:1901623 | regulation of lymphocyte chemotaxis         | 17735 | 13   | 54 | 1  | 0.04  | 0.04381  | 25       | CCL2                                                                                                        |
| lightcyan | MF | GO:0004842 | ubiquitin-protein ligase activity           | 17735 | 253  | 54 | 3  | 0.79  | 0.04382  | 3.797468 | HERCS;HERC6;TRIM69                                                                                          |
| lightcyan | BP | GO:0007005 | mitochondrion organization                  | 17735 | 230  | 54 | 3  | 0.79  | 0.04445  | 3.797468 | IF16;IFIT2;PNPT1                                                                                            |
| lightcyan | BP | GO:0071219 | cellular response to molecule of bacteri... | 17735 | 98   | 54 | 2  | 0.34  | 0.04468  | 5.882353 | CCL2;CMPK2                                                                                                  |
| lightcyan | BP | GO:0019941 | modification-dependent protein catabolic... | 17735 | 392  | 54 | 4  | 1.35  | 0.04533  | 2.962963 | HERCS;HERC6;ISG15;USP18                                                                                     |
| lightcyan | BP | GO:0006984 | ER-nucleus signaling pathway                | 17735 | 99   | 54 | 2  | 0.34  | 0.0455   | 5.882353 | CCL2;EIF2AK2                                                                                                |
| lightcyan | CC | GO:0005852 | eukaryotic translation initiation factor... | 17735 | 15   | 54 | 1  | 0.05  | 0.04558  | 20       | EIF3L                                                                                                       |
| lightcyan | MF | GO:0000175 | 3'-5'-exoribonuclease activity              | 17735 | 15   | 54 | 1  | 0.05  | 0.04566  | 20       | PNPT1                                                                                                       |
| lightcyan | BP | GO:0002699 | positive regulation of immune effector p... | 17735 | 100  | 54 | 2  | 0.34  | 0.04633  | 5.882353 | CCL2;RSAD2                                                                                                  |
| lightcyan | BP | GO:0002686 | negative regulation of leukocyte migrati... | 17735 | 14   | 54 | 1  | 0.05  | 0.0471   | 20       | CCL2                                                                                                        |
| lightcyan | BP | GO:0055070 | copper ion homeostasis                      | 17735 | 14   | 54 | 1  | 0.05  | 0.0471   | 20       | MT2A                                                                                                        |
| lightcyan | CC | GO:0043231 | intracellular membrane-bounded organelle    | 17735 | 9560 | 54 | 36 | 29.67 | 0.04937  | 1.213347 | AGRN;BST2;CMPK2;CTSL1;EIF3L;EXOC3L1;HERCS;HERC6;IF16;IFIH1;IFIT2;IFIT3;IFITM3;IRF7;LAMP3;MT2A;M             |
| grey60    | BP | GO:0006954 | inflammatory response                       | 17735 | 489  | 43 | 8  | 1.35  | 4.60E-05 | 5.925926 | ADORA3;ALOX15;CCL23;IDO1;IL1RL1;IL34;IL5RA;SEMA7A                                                           |
| grey60    | BP | GO:0032101 | regulation of response to external stimu... | 17735 | 380  | 43 | 7  | 1.05  | 7.00E-05 | 6.666667 | ADORA3;CYP4F12;IDO1;IL1RL1;SEMA7A;TEC;THBS4                                                                 |
| grey60    | BP | GO:0009611 | response to wounding                        | 17735 | 1090 | 43 | 11 | 3     | 0.00012  | 3.666667 | ADORA3;ALOX15;CCL23;CYP4F12;IDO1;IL1RL1;IL34;IL5RA;PIK3R6;SEMA7A;TEC                                        |
| grey60    | BP | GO:0032634 | interleukin-5 production                    | 17735 | 12   | 43 | 2  | 0.03  | 0.00048  | 66.66667 | IL1RL1;IL5RA                                                                                                |
| grey60    | BP | GO:0032674 | regulation of interleukin-5 production      | 17735 | 12   | 43 | 2  | 0.03  | 0.00048  | 66.66667 | IL1RL1;IL5RA                                                                                                |
| grey60    | BP | GO:0032941 | secretion by tissue                         | 17735 | 62   | 43 | 3  | 0.17  | 0.00065  | 17.64706 | ADORA3;P2RY2;SLC29A1                                                                                        |
| grey60    | BP | GO:0044282 | small molecule catabolic process            | 17735 | 257  | 43 | 5  | 0.71  | 0.00066  | 7.042254 | ASRGL1;CYP4F12;IDO1;SMPD3;SORD                                                                              |
| grey60    | BP | GO:0044712 | single-organism catabolic process           | 17735 | 257  | 43 | 5  | 0.71  | 0.00066  | 7.042254 | ASRGL1;CYP4F12;IDO1;SMPD3;SORD                                                                              |
| grey60    | BP | GO:0051239 | regulation of multicellular organismal p... | 17735 | 1804 | 43 | 13 | 4.96  | 0.00074  | 2.620968 | ADORA3;CYP4F12;CYSLTR2;IDO1;IL1RL1;IL5RA;OLIG2;P2RY2;PIK3R6;PNP2;SEMA7A;TEC;THBS4                           |
| grey60    | BP | GO:0032103 | positive regulation of response to exter... | 17735 | 153  | 43 | 4  | 0.42  | 8.00E-04 | 9.52381  | ADORA3;IDO1;IL1RL1;THBS4                                                                                    |
| grey60    | BP | GO:0050729 | positive regulation of inflammatory resp... | 17735 | 70   | 43 | 3  | 0.19  | 0.00093  | 15.78947 | ADORA3;IDO1;IL1RL1                                                                                          |
| grey60    | BP | GO:0007589 | body fluid secretion                        | 17735 | 72   | 43 | 3  | 0.2   | 0.00101  | 15       | ADORA3;P2RY2;SLC29A1                                                                                        |
| grey60    | BP | GO:0050727 | regulation of inflammatory response         | 17735 | 191  | 43 | 4  | 0.53  | 0.00182  | 7.54717  | ADORA3;IDO1;IL1RL1;SEMA7A                                                                                   |
| grey60    | BP | GO:0002532 | production of molecular mediator involve... | 17735 | 25   | 43 | 2  | 0.07  | 0.00213  | 28.57143 | ADORA3;IDO1                                                                                                 |
| grey60    | BP | GO:0006955 | immune response                             | 17735 | 1081 | 43 | 9  | 2.97  | 0.00224  | 3.030303 | ADORA3;CCL23;CYSLTR2;IDO1;IL1RL1;IL34;IL5RA;SEMA7A;TEC                                                      |

|        |    |            |                                             |       |      |    |    |       |         |          |                                                                                               |
|--------|----|------------|---------------------------------------------|-------|------|----|----|-------|---------|----------|-----------------------------------------------------------------------------------------------|
| grey60 | BP | GO:0006952 | defense response                            | 17735 | 1119 | 43 | 9  | 3.08  | 0.00284 | 2.922078 | ADORA3;ALOX15;CCL23;CEBPE;IDO1;IL1RL1;IL34;IL5RA;SEMA7A                                       |
| grey60 | BP | GO:0048584 | positive regulation of response to stimu... | 17735 | 1164 | 43 | 9  | 3.2   | 0.0037  | 2.8125   | ADORA3;CAT;CYSLTR2;IDO1;IL1RL1;PIK3R6;SEMA7A;TEC;THBS4                                        |
| grey60 | BP | GO:0002684 | positive regulation of immune system pro... | 17735 | 554  | 43 | 6  | 1.52  | 0.00379 | 3.947368 | ADORA3;IDO1;IL1RL1;SEMA7A;TEC;THBS4                                                           |
| grey60 | BP | GO:0004691 | leukotriene metabolic process               | 17735 | 34   | 43 | 2  | 0.09  | 0.00392 | 22.22222 | ALOX15;CYP4F12                                                                                |
| grey60 | MF | GO:0035586 | purinergic receptor activity                | 17735 | 37   | 43 | 2  | 0.1   | 0.0041  | 20       | ADORA3;P2RY2                                                                                  |
| grey60 | MF | GO:0020037 | heme binding                                | 17735 | 131  | 43 | 3  | 0.34  | 0.0046  | 8.823529 | CAT;CYP4F12;IDO1                                                                              |
| grey60 | BP | GO:0050878 | regulation of body fluid levels             | 17735 | 594  | 43 | 6  | 1.63  | 0.00532 | 3.680982 | ADORA3;CYP4F12;P2RY2;PIK3R6;SLC29A1;TEC                                                       |
| grey60 | BP | GO:0009605 | response to external stimulus               | 17735 | 1238 | 43 | 9  | 3.41  | 0.00556 | 2.639296 | ADORA3;CAT;CCL23;CYP4F12;IDO1;IL1RL1;SEMA7A;TEC;THBS4                                         |
| grey60 | MF | GO:0046906 | tetrapyrrole binding                        | 17735 | 140  | 43 | 3  | 0.36  | 0.0056  | 8.333333 | CAT;CYP4F12;IDO1                                                                              |
| grey60 | BP | GO:0001816 | cytokine production                         | 17735 | 430  | 43 | 5  | 1.18  | 0.0062  | 4.237288 | CEBPE;IDO1;IL1RL1;IL5RA;SEMA7A                                                                |
| grey60 | BP | GO:0014068 | positive regulation of phosphatidylinosi... | 17735 | 44   | 43 | 2  | 0.12  | 0.00649 | 16.66667 | ADORA3;CAT                                                                                    |
| grey60 | BP | GO:0002376 | immune system process                       | 17735 | 1816 | 43 | 11 | 5     | 0.0082  | 2.2      | ADORA3;CCL23;CEBPE;CYSLTR2;IDO1;IL1RL1;IL34;IL5RA;SEMA7A;TEC;THBS4                            |
| grey60 | BP | GO:0006950 | response to stress                          | 17735 | 2926 | 43 | 15 | 8.05  | 0.0083  | 1.863354 | ACOT11;ADORA3;ALOX15;CAT;CCL23;CEBPE;CYP4F12;IDO1;IL1RL1;IL34;IL5RA;PIK3R6;SEMA7A;SLC29A1;TEC |
| grey60 | BP | GO:0046164 | alcohol catabolic process                   | 17735 | 51   | 43 | 2  | 0.14  | 0.00864 | 14.28571 | SMPD3;SORD                                                                                    |
| grey60 | BP | GO:0045765 | regulation of angiogenesis                  | 17735 | 157  | 43 | 3  | 0.43  | 0.00911 | 6.976744 | CYSLTR2;PIK3R6;THBS4                                                                          |
| grey60 | MF | GO:0016811 | hydrolase activity, acting on carbon-nit... | 17735 | 57   | 43 | 2  | 0.15  | 0.0095  | 13.33333 | ASRGL1;CAT                                                                                    |
| grey60 | BP | GO:0014066 | regulation of phosphatidylinositol 3-kin... | 17735 | 55   | 43 | 2  | 0.15  | 0.00999 | 13.33333 | ADORA3;CAT                                                                                    |
| grey60 | BP | GO:0050801 | ion homeostasis                             | 17735 | 679  | 43 | 6  | 1.87  | 0.01003 | 3.208556 | CCL23;CYP4F12;OLIG2;P2RY2;PMP22;SLC29A1                                                       |
| grey60 | BP | GO:1901616 | organic hydroxy compound catabolic proce... | 17735 | 56   | 43 | 2  | 0.15  | 0.01035 | 13.33333 | SMPD3;SORD                                                                                    |
| grey60 | BP | GO:0048663 | neuron fate commitment                      | 17735 | 57   | 43 | 2  | 0.16  | 0.0107  | 12.5     | OLIG1;OLIG2                                                                                   |
| grey60 | BP | GO:1901342 | regulation of vasculature development       | 17735 | 170  | 43 | 3  | 0.47  | 0.0113  | 6.382979 | CYSLTR2;PIK3R6;THBS4                                                                          |
| grey60 | BP | GO:0051781 | positive regulation of cell division        | 17735 | 59   | 43 | 2  | 0.16  | 0.01144 | 12.5     | CAT;THBS4                                                                                     |
| grey60 | BP | GO:0030193 | regulation of blood coagulation             | 17735 | 62   | 43 | 2  | 0.17  | 0.01257 | 11.76471 | CYP4F12;TEC                                                                                   |
| grey60 | BP | GO:1900046 | regulation of hemostasis                    | 17735 | 62   | 43 | 2  | 0.17  | 0.01257 | 11.76471 | CYP4F12;TEC                                                                                   |
| grey60 | CC | GO:0005615 | extracellular space                         | 17735 | 844  | 43 | 6  | 1.96  | 0.013   | 3.061224 | CCL23;IL34;IL5RA;PRSS33;SORD;THBS4                                                            |
| grey60 | BP | GO:0035556 | intracellular signal transduction           | 17735 | 1936 | 43 | 11 | 5.33  | 0.01307 | 2.06379  | ACOT11;ADORA3;ASB2;CAT;CYSLTR2;IL1RL1;LGALS12;PIK3R6;SEMA7A;SRGAP3;TEC                        |
| grey60 | BP | GO:0002687 | positive regulation of leukocyte migrati... | 17735 | 65   | 43 | 2  | 0.18  | 0.01376 | 11.11111 | ADORA3;THBS4                                                                                  |
| grey60 | BP | GO:0023052 | signaling                                   | 17735 | 4666 | 43 | 20 | 12.84 | 0.01383 | 1.557632 | ACOT11;ADORA3;ASB2;CAT;CCL23;CYSLTR2;EPN2;IL1RL1;IL5RA;LGALS12;OLIG2;P2RY2;PIK3R6;PMP22;SEM/  |
| grey60 | BP | GO:0044700 | single organism signaling                   | 17735 | 4666 | 43 | 20 | 12.84 | 0.01383 | 1.557632 | ACOT11;ADORA3;ASB2;CAT;CCL23;CYSLTR2;EPN2;IL1RL1;IL5RA;LGALS12;OLIG2;P2RY2;PIK3R6;PMP22;SEM/  |
| grey60 | BP | GO:0051240 | positive regulation of multicellular org... | 17735 | 524  | 43 | 5  | 1.44  | 0.01386 | 3.472222 | ADORA3;IDO1;IL1RL1;P2RY2;SEMA7A                                                               |
| grey60 | BP | GO:0050818 | regulation of coagulation                   | 17735 | 67   | 43 | 2  | 0.18  | 0.01457 | 11.11111 | CYP4F12;TEC                                                                                   |
| grey60 | BP | GO:0080134 | regulation of response to stress            | 17735 | 737  | 43 | 6  | 2.03  | 0.01462 | 2.955665 | ADORA3;CYP4F12;IDO1;IL1RL1;SEMA7A;TEC                                                         |
| grey60 | BP | GO:0007229 | integrin-mediated signaling pathway         | 17735 | 68   | 43 | 2  | 0.19  | 0.01499 | 10.52632 | SEMA7A;TEC                                                                                    |
| grey60 | CC | GO:0031985 | Golgi cisterna                              | 17735 | 80   | 43 | 2  | 0.19  | 0.015   | 10.52632 | ABO;SMPD3                                                                                     |
| grey60 | CC | GO:0031984 | organelle subcompartment                    | 17735 | 83   | 43 | 2  | 0.19  | 0.016   | 10.52632 | ABO;SMPD3                                                                                     |
| grey60 | BP | GO:0006690 | icosanoid metabolic process                 | 17735 | 71   | 43 | 2  | 0.2   | 0.01627 | 10       | ALOX15;CYP4F12                                                                                |
| grey60 | BP | GO:1901568 | fatty acid derivative metabolic process     | 17735 | 71   | 43 | 2  | 0.2   | 0.01627 | 10       | ALOX15;CYP4F12                                                                                |
| grey60 | BP | GO:0050865 | regulation of cell activation               | 17735 | 359  | 43 | 4  | 0.99  | 0.01659 | 4.040404 | ADORA3;IDO1;IL1RL1;TEC                                                                        |
| grey60 | BP | GO:0016054 | organic acid catabolic process              | 17735 | 198  | 43 | 3  | 0.54  | 0.01698 | 5.555556 | ASRGL1;CYP4F12;IDO1                                                                           |
| grey60 | BP | GO:0046395 | carboxylic acid catabolic process           | 17735 | 198  | 43 | 3  | 0.54  | 0.01698 | 5.555556 | ASRGL1;CYP4F12;IDO1                                                                           |
| grey60 | MF | GO:0030246 | carbohydrate binding                        | 17735 | 215  | 43 | 3  | 0.55  | 0.0178  | 5.454545 | LGALS12;SIGLEC8;SORD                                                                          |
| grey60 | BP | GO:0001819 | positive regulation of cytokine producti... | 17735 | 202  | 43 | 3  | 0.56  | 0.0179  | 5.357143 | IDO1;IL1RL1;SEMA7A                                                                            |
| grey60 | BP | GO:0050776 | regulation of immune response               | 17735 | 560  | 43 | 5  | 1.54  | 0.018   | 3.246753 | ADORA3;IDO1;IL1RL1;SEMA7A;TEC                                                                 |
| grey60 | BP | GO:0007154 | cell communication                          | 17735 | 4775 | 43 | 20 | 13.14 | 0.018   | 1.52207  | ACOT11;ADORA3;ASB2;CAT;CCL23;CYSLTR2;EPN2;IL1RL1;IL5RA;LGALS12;OLIG2;P2RY2;PIK3R6;PMP22;SEM/  |
| grey60 | BP | GO:0014065 | phosphatidylinositol 3-kinase cascade       | 17735 | 75   | 43 | 2  | 0.21  | 0.01804 | 9.52381  | ADORA3;CAT                                                                                    |
| grey60 | MF | GO:0016702 | oxidoreductase activity, acting on singl... | 17735 | 80   | 43 | 2  | 0.21  | 0.0181  | 9.52381  | ALOX15;IDO1                                                                                   |
| grey60 | MF | GO:0004896 | cytokine receptor activity                  | 17735 | 81   | 43 | 2  | 0.21  | 0.0185  | 9.52381  | IL1RL1;IL5RA                                                                                  |
| grey60 | MF | GO:0005178 | integrin binding                            | 17735 | 81   | 43 | 2  | 0.21  | 0.0185  | 9.52381  | SEMA7A;THBS4                                                                                  |
| grey60 | MF | GO:0016701 | oxidoreductase activity, acting on singl... | 17735 | 81   | 43 | 2  | 0.21  | 0.0185  | 9.52381  | ALOX15;IDO1                                                                                   |
| grey60 | MF | GO:0051213 | dioxygenase activity                        | 17735 | 82   | 43 | 2  | 0.21  | 0.0189  | 9.52381  | ALOX15;IDO1                                                                                   |
| grey60 | BP | GO:0001817 | regulation of cytokine production           | 17735 | 382  | 43 | 4  | 1.05  | 0.02035 | 3.809524 | IDO1;IL1RL1;IL5RA;SEMA7A                                                                      |
| grey60 | BP | GO:0061041 | regulation of wound healing                 | 17735 | 82   | 43 | 2  | 0.23  | 0.02133 | 8.695652 | CYP4F12;TEC                                                                                   |
| grey60 | BP | GO:0033559 | unsaturated fatty acid metabolic process    | 17735 | 83   | 43 | 2  | 0.23  | 0.02182 | 8.695652 | ALOX15;CYP4F12                                                                                |
| grey60 | BP | GO:0042552 | myelination                                 | 17735 | 84   | 43 | 2  | 0.23  | 0.02232 | 8.695652 | OLIG2;PMP22                                                                                   |
| grey60 | BP | GO:1901606 | alpha-amino acid catabolic process          | 17735 | 84   | 43 | 2  | 0.23  | 0.02232 | 8.695652 | ASRGL1;IDO1                                                                                   |
| grey60 | BP | GO:0002685 | regulation of leukocyte migration           | 17735 | 85   | 43 | 2  | 0.23  | 0.02281 | 8.695652 | ADORA3;THBS4                                                                                  |
| grey60 | BP | GO:0051302 | regulation of cell division                 | 17735 | 85   | 43 | 2  | 0.23  | 0.02281 | 8.695652 | CAT;THBS4                                                                                     |
| grey60 | BP | GO:0051047 | positive regulation of secretion            | 17735 | 223  | 43 | 3  | 0.61  | 0.02318 | 4.918033 | ADORA3;IL1RL1;P2RY2                                                                           |
| grey60 | BP | GO:0007272 | ensheathment of neurons                     | 17735 | 87   | 43 | 2  | 0.24  | 0.02383 | 8.333333 | OLIG2;PMP22                                                                                   |
| grey60 | BP | GO:0008366 | axon ensheathment                           | 17735 | 87   | 43 | 2  | 0.24  | 0.02383 | 8.333333 | OLIG2;PMP22                                                                                   |
| grey60 | BP | GO:0070374 | positive regulation of ERK1 and ERK2 cas... | 17735 | 87   | 43 | 2  | 0.24  | 0.02383 | 8.333333 | CYSLTR2;SEMA7A                                                                                |
| grey60 | BP | GO:0006873 | cellular ion homeostasis                    | 17735 | 604  | 43 | 5  | 1.66  | 0.0241  | 3.012048 | CCL23;OLIG2;P2RY2;PMP22;SLC29A1                                                               |
| grey60 | BP | GO:0031349 | positive regulation of defense response     | 17735 | 229  | 43 | 3  | 0.63  | 0.02483 | 4.761905 | ADORA3;IDO1;IL1RL1                                                                            |
| grey60 | BP | GO:0045766 | positive regulation of angiogenesis         | 17735 | 89   | 43 | 2  | 0.24  | 0.02485 | 8.333333 | CYSLTR2;PIK3R6                                                                                |
| grey60 | BP | GO:0044255 | cellular lipid metabolic process            | 17735 | 837  | 43 | 6  | 2.3   | 0.0257  | 2.608696 | ACOT11;ALOX15;CAT;CYP4F12;PIK3R6;SMPD3                                                        |
| grey60 | CC | GO:0005795 | Golgi stack                                 | 17735 | 110  | 43 | 2  | 0.26  | 0.027   | 7.692308 | ABO;SMPD3                                                                                     |
| grey60 | BP | GO:0002517 | T cell tolerance induction                  | 17735 | 10   | 43 | 1  | 0.03  | 0.02718 | 33.33333 | IDO1                                                                                          |
| grey60 | BP | GO:0002645 | positive regulation of tolerance inducti... | 17735 | 10   | 43 | 1  | 0.03  | 0.02718 | 33.33333 | IDO1                                                                                          |
| grey60 | BP | GO:0010935 | regulation of macrophage cytokine produc... | 17735 | 10   | 43 | 1  | 0.03  | 0.02718 | 33.33333 | SEMA7A                                                                                        |



|        |    |            |                                             |       |      |    |    |      |         |          |                                                                                               |
|--------|----|------------|---------------------------------------------|-------|------|----|----|------|---------|----------|-----------------------------------------------------------------------------------------------|
| grey60 | BP | GO:0043032 | positive regulation of macrophage activa... | 17735 | 10   | 43 | 1  | 0.03 | 0.02718 | 33.33333 | IL1RL1                                                                                        |
| grey60 | BP | GO:0043302 | positive regulation of leukocyte degranu... | 17735 | 10   | 43 | 1  | 0.03 | 0.02718 | 33.33333 | ADORA3                                                                                        |
| grey60 | MF | GO:0005337 | nucleoside transmembrane transporter act... | 17735 | 11   | 43 | 1  | 0.03 | 0.028   | 33.33333 | SLC29A1                                                                                       |
| grey60 | BP | GO:0031347 | regulation of defense response              | 17735 | 428  | 43 | 4  | 1.18 | 0.02936 | 3.389831 | ADORA3;IDO1;IL1RL1;SEMA7A                                                                     |
| grey60 | BP | GO:0032787 | monocarboxylic acid metabolic process       | 17735 | 430  | 43 | 4  | 1.18 | 0.0298  | 3.389831 | ACOT11;ALOX15;CYP4F12;IDO1                                                                    |
| grey60 | BP | GO:002643  | regulation of tolerance induction           | 17735 | 11   | 43 | 1  | 0.03 | 0.02986 | 33.33333 | IDO1                                                                                          |
| grey60 | BP | GO:0006000 | fructose metabolic process                  | 17735 | 11   | 43 | 1  | 0.03 | 0.02986 | 33.33333 | SORD                                                                                          |
| grey60 | BP | GO:0006569 | tryptophan catabolic process                | 17735 | 11   | 43 | 1  | 0.03 | 0.02986 | 33.33333 | IDO1                                                                                          |
| grey60 | BP | GO:0009650 | UV protection                               | 17735 | 11   | 43 | 1  | 0.03 | 0.02986 | 33.33333 | CAT                                                                                           |
| grey60 | BP | GO:0010934 | macrophage cytokine production              | 17735 | 11   | 43 | 1  | 0.03 | 0.02986 | 33.33333 | SEMA7A                                                                                        |
| grey60 | BP | GO:0033005 | positive regulation of mast cell activat... | 17735 | 11   | 43 | 1  | 0.03 | 0.02986 | 33.33333 | ADORA3                                                                                        |
| grey60 | BP | GO:0042436 | indole-containing compound catabolic pro... | 17735 | 11   | 43 | 1  | 0.03 | 0.02986 | 33.33333 | IDO1                                                                                          |
| grey60 | BP | GO:0045117 | azole transport                             | 17735 | 11   | 43 | 1  | 0.03 | 0.02986 | 33.33333 | ADORA3                                                                                        |
| grey60 | BP | GO:0046218 | indolalkylamine catabolic process           | 17735 | 11   | 43 | 1  | 0.03 | 0.02986 | 33.33333 | IDO1                                                                                          |
| grey60 | BP | GO:2000026 | regulation of multicellular organismal d... | 17735 | 1113 | 43 | 7  | 3.06 | 0.0304  | 2.287582 | CYSLTR2;IDO1;OLIG2;PIK3R6;PMP22;SEMA7A;THBS4                                                  |
| grey60 | MF | GO:0035004 | phosphatidylinositol 3-kinase activity      | 17735 | 12   | 43 | 1  | 0.03 | 0.0305  | 33.33333 | PIK3R6                                                                                        |
| grey60 | BP | GO:0048878 | chemical homeostasis                        | 17735 | 872  | 43 | 6  | 2.4  | 0.03064 | 2.5      | CCL23;CYP4F12;OLIG2;P2RY2;PMP22;SLC29A1                                                       |
| grey60 | BP | GO:0002699 | positive regulation of immune effector p... | 17735 | 100  | 43 | 2  | 0.28 | 0.03083 | 7.142857 | ADORA3;SEMA7A                                                                                 |
| grey60 | CC | GO:0043218 | compact myelin                              | 17735 | 14   | 43 | 1  | 0.03 | 0.032   | 33.33333 | PMP22                                                                                         |
| grey60 | BP | GO:0002682 | regulation of immune system process         | 17735 | 884  | 43 | 6  | 2.43 | 0.03247 | 2.469136 | ADORA3;IDO1;IL1RL1;SEMA7A;TEC;THBS4                                                           |
| grey60 | BP | GO:0015858 | nucleoside transport                        | 17735 | 12   | 43 | 1  | 0.03 | 0.03253 | 33.33333 | SLC29A1                                                                                       |
| grey60 | BP | GO:0042362 | fat-soluble vitamin biosynthetic process    | 17735 | 12   | 43 | 1  | 0.03 | 0.03253 | 33.33333 | CYP4F12                                                                                       |
| grey60 | BP | GO:0045136 | development of secondary sexual characte... | 17735 | 12   | 43 | 1  | 0.03 | 0.03253 | 33.33333 | CAT                                                                                           |
| grey60 | BP | GO:0045426 | quinone cofactor biosynthetic process       | 17735 | 12   | 43 | 1  | 0.03 | 0.03253 | 33.33333 | CYP4F12                                                                                       |
| grey60 | BP | GO:0090136 | epithelial cell-cell adhesion               | 17735 | 12   | 43 | 1  | 0.03 | 0.03253 | 33.33333 | THBS4                                                                                         |
| grey60 | BP | GO:1901663 | quinone biosynthetic process                | 17735 | 12   | 43 | 1  | 0.03 | 0.03253 | 33.33333 | CYP4F12                                                                                       |
| grey60 | BP | GO:0019228 | regulation of action potential in neuron    | 17735 | 103  | 43 | 2  | 0.28 | 0.03255 | 7.142857 | OLIG2;PMP22                                                                                   |
| grey60 | MF | GO:0008242 | omega peptidase activity                    | 17735 | 13   | 43 | 1  | 0.03 | 0.033   | 33.33333 | ASRGL1                                                                                        |
| grey60 | BP | GO:0050900 | leukocyte migration                         | 17735 | 257  | 43 | 3  | 0.71 | 0.03335 | 4.225352 | ADORA3;CCL23;THBS4                                                                            |
| grey60 | BP | GO:0051716 | cellular response to stimulus               | 17735 | 5052 | 43 | 20 | 13.9 | 0.03339 | 1.438849 | ACOT11;ADORA3;ASB2;CAT;CCL23;CEBPE;CYP4F12;CYSLTR2;EPN2;IL1RL1;IL5RA;LGALS12;P2RY2;PIK3R6;SEM |
| grey60 | MF | GO:0016491 | oxidoreductase activity                     | 17735 | 709  | 43 | 5  | 1.83 | 0.0345  | 2.73224  | ALOX15;CAT;CYP4F12;IDO1;SORD                                                                  |
| grey60 | BP | GO:0055082 | cellular chemical homeostasis               | 17735 | 665  | 43 | 5  | 1.83 | 0.03457 | 2.73224  | CCL23;OLIG2;P2RY2;PMP22;SLC29A1                                                               |
| grey60 | BP | GO:0019369 | arachidonic acid metabolic process          | 17735 | 13   | 43 | 1  | 0.04 | 0.03519 | 25       | CYP4F12                                                                                       |
| grey60 | MF | GO:0016810 | hydrolase activity, acting on carbon-nit... | 17735 | 115  | 43 | 2  | 0.3  | 0.0354  | 6.666667 | ASRGL1;CAT                                                                                    |
| grey60 | MF | GO:0047617 | acyl-CoA hydrolase activity                 | 17735 | 14   | 43 | 1  | 0.04 | 0.0355  | 25       | ACOT11                                                                                        |
| grey60 | MF | GO:0048020 | CCR chemokine receptor binding              | 17735 | 14   | 43 | 1  | 0.04 | 0.0355  | 25       | CCL23                                                                                         |
| grey60 | BP | GO:0009063 | cellular amino acid catabolic process       | 17735 | 109  | 43 | 2  | 0.3  | 0.0361  | 6.666667 | ASRGL1;IDO1                                                                                   |
| grey60 | BP | GO:0065008 | regulation of biological quality            | 17735 | 2547 | 43 | 12 | 7.01 | 0.03684 | 1.71184  | ADORA3;BACE2;CCL23;CYP4F12;OLIG2;P2RY2;PIK3R6;PMP22;SEMA7A;SLC29A1;SMPD3;TEC                  |
| grey60 | BP | GO:0001977 | renal system process involved in regulat... | 17735 | 14   | 43 | 1  | 0.04 | 0.03785 | 25       | CYP4F12                                                                                       |
| grey60 | BP | GO:0003091 | renal water homeostasis                     | 17735 | 14   | 43 | 1  | 0.04 | 0.03785 | 25       | CYP4F12                                                                                       |
| grey60 | BP | GO:0006568 | tryptophan metabolic process                | 17735 | 14   | 43 | 1  | 0.04 | 0.03785 | 25       | IDO1                                                                                          |
| grey60 | BP | GO:0006684 | sphingomyelin metabolic process             | 17735 | 14   | 43 | 1  | 0.04 | 0.03785 | 25       | SMPD3                                                                                         |
| grey60 | BP | GO:0020027 | hemoglobin metabolic process                | 17735 | 14   | 43 | 1  | 0.04 | 0.03785 | 25       | CAT                                                                                           |
| grey60 | BP | GO:0021781 | glial cell fate commitment                  | 17735 | 14   | 43 | 1  | 0.04 | 0.03785 | 25       | OLIG2                                                                                         |
| grey60 | BP | GO:0042391 | regulation of membrane potential            | 17735 | 271  | 43 | 3  | 0.75 | 0.03812 | 4        | OLIG2;PMP22;SLC29A1                                                                           |
| grey60 | BP | GO:0070372 | regulation of ERK1 and ERK2 cascade         | 17735 | 115  | 43 | 2  | 0.32 | 0.03979 | 6.25     | CYSLTR2;SEMA7A                                                                                |
| grey60 | BP | GO:0002823 | negative regulation of adaptive immune r... | 17735 | 15   | 43 | 1  | 0.04 | 0.0405  | 25       | IL1RL1                                                                                        |
| grey60 | BP | GO:0009068 | aspartate family amino acid catabolic pr... | 17735 | 15   | 43 | 1  | 0.04 | 0.0405  | 25       | ASRGL1                                                                                        |
| grey60 | BP | GO:0046174 | polyol catabolic process                    | 17735 | 15   | 43 | 1  | 0.04 | 0.0405  | 25       | SORD                                                                                          |
| grey60 | BP | GO:1901661 | quinone metabolic process                   | 17735 | 15   | 43 | 1  | 0.04 | 0.0405  | 25       | CYP4F12                                                                                       |
| grey60 | MF | GO:0071837 | HMG box domain binding                      | 17735 | 16   | 43 | 1  | 0.04 | 0.0405  | 25       | OLIG2                                                                                         |
| grey60 | MF | GO:0008194 | UDP-glycosyltransferase activity            | 17735 | 124  | 43 | 2  | 0.32 | 0.0406  | 6.25     | ABO;MGAT3                                                                                     |
| grey60 | BP | GO:0002274 | myeloid leukocyte activation                | 17735 | 117  | 43 | 2  | 0.32 | 0.04105 | 6.25     | ADORA3;IL1RL1                                                                                 |
| grey60 | BP | GO:0050769 | positive regulation of neurogenesis         | 17735 | 117  | 43 | 2  | 0.32 | 0.04105 | 6.25     | OLIG2;SEMA7A                                                                                  |
| grey60 | MF | GO:0008201 | heparin binding                             | 17735 | 128  | 43 | 2  | 0.33 | 0.043   | 6.060606 | CCL23;THBS4                                                                                   |
| grey60 | MF | GO:0016614 | oxidoreductase activity, acting on CH-OH... | 17735 | 128  | 43 | 2  | 0.33 | 0.043   | 6.060606 | CYP4F12;SORD                                                                                  |
| grey60 | BP | GO:0002507 | tolerance induction                         | 17735 | 16   | 43 | 1  | 0.04 | 0.04314 | 25       | IDO1                                                                                          |
| grey60 | BP | GO:0032288 | myelin assembly                             | 17735 | 16   | 43 | 1  | 0.04 | 0.04314 | 25       | PMP22                                                                                         |
| grey60 | BP | GO:0042402 | cellular biogenic amine catabolic proces... | 17735 | 16   | 43 | 1  | 0.04 | 0.04314 | 25       | IDO1                                                                                          |
| grey60 | BP | GO:0043304 | regulation of mast cell degranulation       | 17735 | 16   | 43 | 1  | 0.04 | 0.04314 | 25       | ADORA3                                                                                        |
| grey60 | BP | GO:0070232 | regulation of T cell apoptotic process      | 17735 | 16   | 43 | 1  | 0.04 | 0.04314 | 25       | IDO1                                                                                          |
| grey60 | BP | GO:0090023 | positive regulation of neutrophil chemot... | 17735 | 16   | 43 | 1  | 0.04 | 0.04314 | 25       | THBS4                                                                                         |
| grey60 | CC | GO:0044421 | extracellular region part                   | 17735 | 1123 | 43 | 6  | 2.61 | 0.044   | 2.298851 | CCL23;IL34;IL5RA;PRSS33;SORD;THBS4                                                            |
| grey60 | BP | GO:0030595 | leukocyte chemotaxis                        | 17735 | 123  | 43 | 2  | 0.34 | 0.04493 | 5.882353 | CCL23;THBS4                                                                                   |
| grey60 | CC | GO:0031225 | anchored to membrane                        | 17735 | 145  | 43 | 2  | 0.34 | 0.045   | 5.882353 | PRSS41;SEMA7A                                                                                 |
| grey60 | MF | GO:0016289 | CoA hydrolase activity                      | 17735 | 18   | 43 | 1  | 0.05 | 0.0455  | 20       | ACOT11                                                                                        |
| grey60 | BP | GO:0002820 | negative regulation of adaptive immune r... | 17735 | 17   | 43 | 1  | 0.05 | 0.04577 | 20       | IL1RL1                                                                                        |
| grey60 | BP | GO:0033006 | regulation of mast cell activation invol... | 17735 | 17   | 43 | 1  | 0.05 | 0.04577 | 20       | ADORA3                                                                                        |
| grey60 | BP | GO:0042375 | quinone cofactor metabolic process          | 17735 | 17   | 43 | 1  | 0.05 | 0.04577 | 20       | CYP4F12                                                                                       |

|            |    |            |                                             |       |      |     |    |       |          |          |                                                                                                             |
|------------|----|------------|---------------------------------------------|-------|------|-----|----|-------|----------|----------|-------------------------------------------------------------------------------------------------------------|
| grey60     | BP | GO:0061082 | myeloid leukocyte cytokine production       | 17735 | 17   | 43  | 1  | 0.05  | 0.04577  | 20       | SEMA7A                                                                                                      |
| grey60     | BP | GO:0070229 | negative regulation of lymphocyte apopto... | 17735 | 17   | 43  | 1  | 0.05  | 0.04577  | 20       | IDO1                                                                                                        |
| grey60     | BP | GO:0006576 | cellular biogenic amine metabolic proces... | 17735 | 127  | 43  | 2  | 0.35  | 0.04758  | 5.714286 | IDO1,SMPD3                                                                                                  |
| grey60     | BP | GO:0048583 | regulation of response to stimulus          | 17735 | 2347 | 43  | 11 | 6.46  | 0.04767  | 1.702786 | ADORA3,CAT,CYP4F12,CYSLTR2;IDO1;IL1RL1;PIK3R6;SEMA7A;SRGAP3;TEC;THBS4                                       |
| grey60     | BP | GO:0009310 | amine catabolic process                     | 17735 | 18   | 43  | 1  | 0.05  | 0.0484   | 20       | IDO1                                                                                                        |
| grey60     | BP | GO:0036296 | response to increased oxygen levels         | 17735 | 18   | 43  | 1  | 0.05  | 0.0484   | 20       | CAT                                                                                                         |
| grey60     | BP | GO:0046514 | ceramide catabolic process                  | 17735 | 18   | 43  | 1  | 0.05  | 0.0484   | 20       | SMPD3                                                                                                       |
| grey60     | BP | GO:0050891 | multicellular organismal water homeostas... | 17735 | 18   | 43  | 1  | 0.05  | 0.0484   | 20       | CYP4F12                                                                                                     |
| grey60     | BP | GO:0055093 | response to hyperoxia                       | 17735 | 18   | 43  | 1  | 0.05  | 0.0484   | 20       | CAT                                                                                                         |
| greenyello | BP | GO:0007155 | cell adhesion                               | 17735 | 957  | 126 | 21 | 6.91  | 3.90E-06 | 3.039074 | CCL4;CCL5;CD2;CHST10;CX3CR1;DLG5;EFNA5;EPDR1;ERBB2;FEZ1;FZD4;GPR56;MTSS1;NCAM1;NUAK1;PCD-                   |
| greenyello | BP | GO:0022610 | biological adhesion                         | 17735 | 959  | 126 | 21 | 6.92  | 4.00E-06 | 3.034682 | CCL4;CCL5;CD2;CHST10;CX3CR1;DLG5;EFNA5;EPDR1;ERBB2;FEZ1;FZD4;GPR56;MTSS1;NCAM1;NUAK1;PCD-                   |
| greenyello | MF | GO:0004872 | receptor activity                           | 17735 | 1528 | 126 | 26 | 11.12 | 2.90E-05 | 2.338129 | BAI2;CCRS;CD160;CD2;CX3CR1;CXCR6;ERBB2;F2R;FZD4;GPR114;GPR153;GPR56;GPR68;KIR2DL1;KLRD1;KLRG1               |
| greenyello | CC | GO:0044459 | plasma membrane part                        | 17735 | 1895 | 126 | 30 | 13.91 | 3.30E-05 | 2.156722 | CACNA2D2;CCRS;CD160;CD2;CX3CR1;CXCR6;EFNA5;ERBB2;F2R;FASLG;FCRL6;FZD4;GPR56;GPR68;GZMB;KIF                  |
| greenyello | CC | GO:0071944 | cell periphery                              | 17735 | 4360 | 126 | 52 | 32.01 | 6.20E-05 | 1.624492 | ARL4C;BAI2;BFSP1;BNC2;CACNA2D2;CAMK2N1;CCRS;CD160;CD2;CX3CR1;CXCR6;DLG5;EFNA5;ERBB2;F2R;F-                  |
| greenyello | BP | GO:0006968 | cellular defense response                   | 17735 | 60   | 126 | 5  | 0.43  | 7.10E-05 | 11.62791 | CCRS;CD160;CX3CR1;GNLY;KLRG1                                                                                |
| greenyello | CC | GO:0005886 | plasma membrane                             | 17735 | 4273 | 126 | 51 | 31.37 | 7.60E-05 | 1.625757 | ARL4C;BAI2;BFSP1;BNC2;CACNA2D2;CAMK2N1;CCRS;CD160;CD2;CX3CR1;CXCR6;DLG5;EFNA5;ERBB2;F2R;F-                  |
| greenyello | CC | GO:0009897 | external side of plasma membrane            | 17735 | 202  | 126 | 8  | 1.48  | 0.00012  | 5.405405 | CCRS;CD2;EFNA5;FASLG;FCRL6;KLRD1;LAG3;NCAM1                                                                 |
| greenyello | BP | GO:0007165 | signal transduction                         | 17735 | 4165 | 126 | 48 | 30.08 | 0.00014  | 1.595745 | ADAMTS1;AGAP1;ARL4C;BAI2;CCL4;CCL5;CCRS;CD160;CD2;CLIC3;CX3CR1;CXCR6;DLG5;DTHD1;DUSP8;EDAF                  |
| greenyello | BP | GO:0007166 | cell surface receptor signaling pathway     | 17735 | 2331 | 126 | 32 | 16.83 | 0.00015  | 1.901367 | ADAMTS1;BAI2;CCL5;CCRS;CD160;CD2;CX3CR1;CXCR6;EFNA5;ERBB2;F2R;FASLG;FZD4;GF1;GPR114;GPR56;                  |
| greenyello | MF | GO:0004888 | transmembrane signaling receptor activit... | 17735 | 1232 | 126 | 21 | 8.97  | 0.00019  | 2.341137 | BAI2;CCRS;CD160;CX3CR1;CXCR6;ERBB2;F2R;FZD4;GPR114;GPR153;GPR56;GPR68;KLRD1;LAG3;LGR6;NMU1                  |
| greenyello | BP | GO:0007154 | cell communication                          | 17735 | 4775 | 126 | 52 | 34.48 | 0.00028  | 1.508121 | ADAMTS1;AGAP1;ARL4C;BAI2;CACNA2D2;CCL4;CCL5;CCRS;CD160;CD2;CLIC3;CX3CR1;CXCR6;DLG5;DTHD1;F                  |
| greenyello | BP | GO:0023052 | signaling                                   | 17735 | 4666 | 126 | 51 | 33.69 | 0.00031  | 1.513802 | ADAMTS1;AGAP1;ARL4C;BAI2;CACNA2D2;CCL4;CCL5;CCRS;CD160;CD2;CLIC3;CX3CR1;CXCR6;DLG5;DTHD1;F                  |
| greenyello | BP | GO:0044700 | single organism signaling                   | 17735 | 4666 | 126 | 51 | 33.69 | 0.00031  | 1.513802 | ADAMTS1;AGAP1;ARL4C;BAI2;CACNA2D2;CCL4;CCL5;CCRS;CD160;CD2;CLIC3;CX3CR1;CXCR6;DLG5;DTHD1;F                  |
| greenyello | BP | GO:0050794 | regulation of cellular process              | 17735 | 7700 | 126 | 73 | 55.6  | 0.00038  | 1.31295  | ADAMTS1;AGAP1;APOBEC3G;APOBEC3H;ARL4C;BAI2;BNC2;CACNA2D2;CCL4;CCL5;CCRS;CD160;CD2;CX3CR1;CXCR6;DLG5;DTHD1;F |
| greenyello | BP | GO:0034405 | response to fluid shear stress              | 17735 | 22   | 126 | 3  | 0.16  | 0.00051  | 18.75    | MTSS1;PDGFRB;SMAD7                                                                                          |
| greenyello | BP | GO:0010921 | regulation of phosphatase activity          | 17735 | 92   | 126 | 5  | 0.66  | 0.00053  | 7.575758 | NUAK1;PDGFRB;PPP2R2B;SH3RF2;SYTL2                                                                           |
| greenyello | MF | GO:0038023 | signaling receptor activity                 | 17735 | 1328 | 126 | 21 | 9.66  | 0.00053  | 2.173913 | BAI2;CCRS;CD160;CX3CR1;CXCR6;ERBB2;F2R;FZD4;GPR114;GPR153;GPR56;GPR68;KLRD1;LAG3;LGR6;NMU1                  |
| greenyello | BP | GO:0002682 | regulation of immune system process         | 17735 | 884  | 126 | 16 | 6.38  | 0.00058  | 2.507837 | APOBEC3G;CCL4;CCL5;CD160;CD2;ERBB2;GF1;KIR2DL1;KLRD1;KLRG1;LAG3;PIK3R3;SH2D1B;SLAMF7;TBX21                  |
| greenyello | BP | GO:0019722 | calcium-mediated signaling                  | 17735 | 97   | 126 | 5  | 0.7   | 0.00068  | 7.142857 | CCL4;CCL5;NCAM1;NMUR1;RCAN2                                                                                 |
| greenyello | BP | GO:0030155 | regulation of cell adhesion                 | 17735 | 268  | 126 | 8  | 1.94  | 0.00072  | 4.123711 | CCL5;EFNA5;ERBB2;FZD4;NUAK1;SMAD7;WNT1                                                                      |
| greenyello | MF | GO:0001637 | G-protein coupled chemoattractant recept... | 17735 | 25   | 126 | 3  | 0.18  | 0.00077  | 16.66667 | CCRS;CX3CR1;CXCR6                                                                                           |
| greenyello | MF | GO:0004950 | chemokine receptor activity                 | 17735 | 25   | 126 | 3  | 0.18  | 0.00077  | 16.66667 | CCRS;CX3CR1;CXCR6                                                                                           |
| greenyello | BP | GO:0042110 | T cell activation                           | 17735 | 339  | 126 | 9  | 2.45  | 0.00077  | 3.673469 | CCL5;CD2;EOMES;ERBB2;LAG3;PIK3R3;TBX21;TIGIT;WNT1                                                           |
| greenyello | BP | GO:0051928 | positive regulation of calcium ion trans... | 17735 | 58   | 126 | 4  | 0.42  | 0.00081  | 9.52381  | CCL4;CCL5;F2R;PDGFRB                                                                                        |
| greenyello | CC | GO:0005901 | caveola                                     | 17735 | 57   | 126 | 4  | 0.42  | 0.00081  | 9.52381  | EFNA5;F2R;FASLG;PTCH1                                                                                       |
| greenyello | BP | GO:0071396 | cellular response to lipid                  | 17735 | 213  | 126 | 7  | 1.54  | 0.00089  | 4.545455 | CCL5;CCRS;FZD4;GF1;NPC1;PTCH1;PTGDR                                                                         |
| greenyello | CC | GO:0009986 | cell surface                                | 17735 | 485  | 126 | 11 | 3.56  | 0.00089  | 3.089888 | CCRS;CD2;EFNA5;FASLG;FCRL6;FZD4;KLRD1;LAG3;NCAM1;TIGIT;WNT1                                                 |
| greenyello | BP | GO:0019079 | viral genome replication                    | 17735 | 61   | 126 | 4  | 0.44  | 0.00098  | 9.090909 | APOBEC3G;APOBEC3H;CCL5;CXCR6                                                                                |
| greenyello | BP | GO:0006952 | defense response                            | 17735 | 1119 | 126 | 18 | 8.08  | 0.00102  | 2.227723 | APOBEC3G;APOBEC3H;CCL4;CCL5;CCRS;CD160;CX3CR1;F2R;GF1;GNLY;GPR68;KLRG1;LAG3;NCAM1;PTGDR;                    |
| greenyello | BP | GO:0043666 | regulation of phosphoprotein phosphatase... | 17735 | 28   | 126 | 3  | 0.2   | 0.00105  | 15       | NUAK1;PDGFRB;PPP2R2B                                                                                        |
| greenyello | MF | GO:0015631 | tubulin binding                             | 17735 | 159  | 126 | 6  | 1.16  | 0.00107  | 5.172414 | ARL4C;FEZ1;JAKMIP1;JAKMIP2;NCALD;RAB11FIP5                                                                  |
| greenyello | BP | GO:0002228 | natural killer cell mediated immunity       | 17735 | 29   | 126 | 3  | 0.21  | 0.00117  | 14.28571 | LAG3;SH2D1B;SLAMF7                                                                                          |
| greenyello | BP | GO:0070098 | chemokine-mediated signaling pathway        | 17735 | 29   | 126 | 3  | 0.21  | 0.00117  | 14.28571 | CCL5;CCRS;CX3CR1                                                                                            |
| greenyello | BP | GO:0035303 | regulation of dephosphorylation             | 17735 | 111  | 126 | 5  | 0.8   | 0.00125  | 6.25     | NUAK1;PDGFRB;PPP2R2B;SH3RF2;SYTL2                                                                           |
| greenyello | BP | GO:0051249 | regulation of lymphocyte activation         | 17735 | 293  | 126 | 8  | 2.12  | 0.00127  | 3.773585 | CCL5;CD2;ERBB2;LAG3;PIK3R3;SLAMF7;TBX21;TIGIT                                                               |
| greenyello | BP | GO:0007186 | G-protein coupled receptor signaling pat... | 17735 | 601  | 126 | 12 | 4.34  | 0.0013   | 2.764977 | BAI2;CCL5;CCRS;CX3CR1;CXCR6;F2R;GPR114;GPR56;GPR68;NMUR1;PTGDR;RG59                                         |
| greenyello | MF | GO:0004930 | G-protein coupled receptor activity         | 17735 | 858  | 126 | 15 | 6.24  | 0.00136  | 2.403846 | BAI2;CCRS;CX3CR1;CXCR6;F2R;FZD4;GPR114;GPR153;GPR56;GPR68;LGR6;NMUR1;PDGFRB;PTGDR;S1PR5                     |
| greenyello | MF | GO:0004871 | signal transducer activity                  | 17735 | 1632 | 126 | 23 | 11.88 | 0.00136  | 1.936027 | BAI2;CCRS;CD160;CX3CR1;CXCR6;ERBB2;F2R;FZD4;GPR114;GPR153;GPR56;GPR68;KLRD1;LAG3;LGR6;NMU1                  |
| greenyello | MF | GO:0060089 | molecular transducer activity               | 17735 | 1632 | 126 | 23 | 11.88 | 0.00136  | 1.936027 | BAI2;CCRS;CD160;CX3CR1;CXCR6;ERBB2;F2R;FZD4;GPR114;GPR153;GPR56;GPR68;KLRD1;LAG3;LGR6;NMU1                  |
| greenyello | MF | GO:0008528 | G-protein coupled peptide receptor activ... | 17735 | 115  | 126 | 5  | 0.84  | 0.00152  | 5.952381 | CCRS;CX3CR1;CXCR6;F2R;NMUR1                                                                                 |
| greenyello | MF | GO:0019902 | phosphatase binding                         | 17735 | 115  | 126 | 5  | 0.84  | 0.00152  | 5.952381 | ERBB2;FCRL6;RCAN2;SH3RF2;SYTL2                                                                              |
| greenyello | BP | GO:0050789 | regulation of biological process            | 17735 | 8134 | 126 | 74 | 58.74 | 0.00153  | 1.259789 | ADAMTS1;AGAP1;APOBEC3G;APOBEC3H;ARL4C;BAI2;BNC2;CACNA2D2;CCL4;CCL5;CCRS;CD160;CD2;CLIC3;F                   |
| greenyello | BP | GO:0045071 | negative regulation of viral genome repl... | 17735 | 32   | 126 | 3  | 0.23  | 0.00156  | 13.04348 | APOBEC3G;APOBEC3H;CCL5                                                                                      |
| greenyello | MF | GO:0001653 | peptide receptor activity                   | 17735 | 116  | 126 | 5  | 0.84  | 0.00157  | 5.952381 | CCRS;CX3CR1;CXCR6;F2R;NMUR1                                                                                 |
| greenyello | BP | GO:0033993 | response to lipid                           | 17735 | 534  | 126 | 11 | 3.86  | 0.00163  | 2.849741 | CCL5;CCRS;F2R;FASLG;FZD4;GF1;NPC1;PDGFRB;PTCH1;PTGDR;RG59                                                   |
| greenyello | CC | GO:0046658 | anchored to plasma membrane                 | 17735 | 32   | 126 | 3  | 0.23  | 0.00164  | 13.04348 | CD160;CD2;EFNA5                                                                                             |
| greenyello | BP | GO:0048525 | negative regulation of viral reproductio... | 17735 | 33   | 126 | 3  | 0.24  | 0.00171  | 12.5     | APOBEC3G;APOBEC3H;CCL5                                                                                      |
| greenyello | BP | GO:0006955 | immune response                             | 17735 | 1081 | 126 | 17 | 7.81  | 0.00183  | 2.176697 | APOBEC3G;CCL4;CCL5;CCRS;CD160;EOMES;FASLG;GF1;KIR2DL1;KLRD1;KLRG1;LAG3;NCAM1;SH2D1B;SLAM                    |
| greenyello | BP | GO:0072676 | lymphocyte migration                        | 17735 | 34   | 126 | 3  | 0.25  | 0.00186  | 12       | CCL4;CCL5;TBX21                                                                                             |
| greenyello | BP | GO:0022407 | regulation of cell-cell adhesion            | 17735 | 73   | 126 | 4  | 0.53  | 0.00191  | 7.54717  | CCL5;EFNA5;SMAD7;WNT1                                                                                       |
| greenyello | BP | GO:0048583 | regulation of response to stimulus          | 17735 | 2347 | 126 | 29 | 16.95 | 0.00196  | 1.710914 | AGAP1;APOBEC3G;CCL4;CCL5;CD160;DUSP8;EFNA5;ERBB2;F2R;FASLG;FZD4;GF1;KIR2DL1;KLRD1;KLRG1;LA                  |
| greenyello | CC | GO:0045121 | membrane raft                               | 17735 | 178  | 126 | 6  | 1.31  | 0.00201  | 4.580153 | EFNA5;F2R;FASLG;NPC1;PTCH1;WNT1                                                                             |
| greenyello | MF | GO:0008092 | cytoskeletal protein binding                | 17735 | 627  | 126 | 12 | 4.56  | 0.00201  | 2.631579 | ARL4C;CCRS;DLG5;EPB414A;FEZ1;JAKMIP1;JAKMIP2;MTSS1;MYO3B;NCALD;NEB;RAB11FIP5                                |
| greenyello | BP | GO:0046649 | lymphocyte activation                       | 17735 | 468  | 126 | 10 | 3.38  | 0.00204  | 2.95858  | CCL5;CD2;EOMES;ERBB2;LAG3;PIK3R3;SLAMF7;TBX21;TIGIT;WNT1                                                    |
| greenyello | MF | GO:0019903 | protein phosphatase binding                 | 17735 | 74   | 126 | 4  | 0.54  | 0.00207  | 7.407407 | ERBB2;FCRL6;RCAN2;SH3RF2                                                                                    |
| greenyello | BP | GO:0014065 | phosphatidylinositol 3-kinase cascade       | 17735 | 75   | 126 | 4  | 0.54  | 0.00211  | 7.407407 | CCL5;ERBB2;F2R;PDGFRB                                                                                       |
| greenyello | BP | GO:0045321 | leukocyte activation                        | 17735 | 552  | 126 | 11 | 3.99  | 0.00211  | 2.756892 | CCL5;CD2;EOMES;ERBB2;LAG3;PIK3R3;SH2D1B;SLAMF7;TBX21;TIGIT;WNT1                                             |
| greenyello | BP | GO:0044763 | single-organism cellular process            | 17735 | 9577 | 126 | 83 | 69.16 | 0.00217  | 1.200116 | ADAMTS1;AGAP1;APOBEC3G;APOBEC3H;ARL4C;BAI2;BFSP1;CACNA2D2;CCL4;CCL5;CCRS;CD160;CD2;CEP78                    |
| greenyello | BP | GO:0045090 | retroviral genome replication               | 17735 | 10   | 126 | 2  | 0.07  | 0.00224  | 28.57143 | APOBEC3G;APOBEC3H                                                                                           |

|               |            |                                              |       |      |     |    |       |         |          |                                                                                              |
|---------------|------------|----------------------------------------------|-------|------|-----|----|-------|---------|----------|----------------------------------------------------------------------------------------------|
| greenyello BP | GO:0072203 | cell proliferation involved in metanephro... | 17735 | 10   | 126 | 2  | 0.07  | 0.00224 | 28.57143 | PDGFRB;PTCH1                                                                                 |
| greenyello MF | GO:0008158 | hedgehog receptor activity                   | 17735 | 10   | 126 | 2  | 0.07  | 0.00227 | 28.57143 | NPC1;PTCH1                                                                                   |
| greenyello BP | GO:0051716 | cellular response to stimulus                | 17735 | 5052 | 126 | 51 | 36.48 | 0.00234 | 1.398026 | ADAMTS1;AGAP1;ARL4C;BAI2;CCL4;CCL5;CCRS5;CD160;CD2;CLIC3;CX3CR1;CXCR6;DLGS;DTHD1;DUSP8;EDAF  |
| greenyello BP | GO:0007528 | neuromuscular junction development           | 17735 | 37   | 126 | 3  | 0.27  | 0.00238 | 11.11111 | CACNA2D2;ERBB2;F2R                                                                           |
| greenyello CC | GO:0019898 | extrinsic to membrane                        | 17735 | 127  | 126 | 5  | 0.93  | 0.00245 | 5.376344 | EPB41L4A;JAKMIP1;RGS9;SMAD7;SYTL2                                                            |
| greenyello BP | GO:0007223 | Wnt receptor signaling pathway, calcium ...  | 17735 | 11   | 126 | 2  | 0.08  | 0.00272 | 25       | FZD4;WNT1                                                                                    |
| greenyello BP | GO:2000242 | negative regulation of reproductive proc...  | 17735 | 81   | 126 | 4  | 0.58  | 0.00279 | 6.896552 | APOBEC3G;APOBEC3H;CCL4;CCL5                                                                  |
| greenyello BP | GO:0002694 | regulation of leukocyte activation           | 17735 | 334  | 126 | 8  | 2.41  | 0.00288 | 3.319502 | CCL5;CD2;ERBB2;LAG3;PIK3R3;SLAMF7;TBX21;TIGIT                                                |
| greenyello BP | GO:0007517 | muscle organ development                     | 17735 | 339  | 126 | 8  | 2.45  | 0.00315 | 3.265306 | CACNA2D2;ERBB2;F2R;MSC;NEB;SGCD;SMAD7;WNT1                                                   |
| greenyello BP | GO:0043922 | negative regulation by host of viral tra...  | 17735 | 12   | 126 | 2  | 0.09  | 0.00325 | 22.22222 | CCL4;CCL5                                                                                    |
| greenyello BP | GO:0048731 | system development                           | 17735 | 3385 | 126 | 37 | 24.44 | 0.00363 | 1.513912 | ADAMTS1;BAI2;BFSP1;CACNA2D2;CD2;EDARADD;EFNA5;EOMES;ERBB2;F2R;FASLG;FEZ1;FZD4;GFI1;GPR56;    |
| greenyello BP | GO:0014911 | positive regulation of smooth muscle cel...  | 17735 | 13   | 126 | 2  | 0.09  | 0.00382 | 22.22222 | CCL5;PDGFRB                                                                                  |
| greenyello BP | GO:0061298 | retina vasculature development in camera...  | 17735 | 13   | 126 | 2  | 0.09  | 0.00382 | 22.22222 | FZD4;PDGFRB                                                                                  |
| greenyello BP | GO:0072111 | cell proliferation involved in kidney de...  | 17735 | 13   | 126 | 2  | 0.09  | 0.00382 | 22.22222 | PDGFRB;PTCH1                                                                                 |
| greenyello BP | GO:1901623 | regulation of lymphocyte chemotaxis          | 17735 | 13   | 126 | 2  | 0.09  | 0.00382 | 22.22222 | CCL4;CCL5                                                                                    |
| greenyello BP | GO:0014068 | positive regulation of phosphatidylinosi...  | 17735 | 44   | 126 | 3  | 0.32  | 0.00391 | 9.375    | CCL5;F2R;PDGFRB                                                                              |
| greenyello BP | GO:0007218 | neuropeptide signaling pathway               | 17735 | 89   | 126 | 4  | 0.64  | 0.00392 | 6.25     | BAI2;GPR114;GPR56;NMUR1                                                                      |
| greenyello CC | GO:0044425 | membrane part                                | 17735 | 6026 | 126 | 59 | 44.24 | 0.00405 | 1.333635 | B3GAT1;B3GNT7;BAI2;C14orf1;CACNA2D2;CCRS5;CD160;CD2;CHST10;CLNDND2;CLIC3;CX3CR1;CXCR6;EFNA5; |
| greenyello CC | GO:0031225 | anchored to membrane                         | 17735 | 145  | 126 | 5  | 1.06  | 0.00433 | 4.716981 | CD160;CD2;CXCR6;EFNA5;NCAM1;XPNPEP2                                                          |
| greenyello BP | GO:0006925 | inflammatory cell apoptotic process          | 17735 | 14   | 126 | 2  | 0.1   | 0.00444 | 20       | CCL5;FASLG                                                                                   |
| greenyello BP | GO:0050865 | regulation of cell activation                | 17735 | 359  | 126 | 8  | 2.59  | 0.00446 | 3.088803 | CCL5;CD2;ERBB2;LAG3;PIK3R3;SLAMF7;TBX21;TIGIT                                                |
| greenyello MF | GO:0048020 | CCR chemokine receptor binding               | 17735 | 14   | 126 | 2  | 0.1   | 0.00451 | 20       | CCL4;CCL5                                                                                    |
| greenyello CC | GO:0031226 | intrinsic to plasma membrane                 | 17735 | 1252 | 126 | 18 | 9.19  | 0.00451 | 1.958651 | CCRS5;CD160;CD2;CX3CR1;CXCR6;EFNA5;F2R;FASLG;FZD4;GPR56;GPR68;KIR2DL1;NKG7;NMUR1;NPC1;PCDH   |
| greenyello BP | GO:0002376 | immune system process                        | 17735 | 1816 | 126 | 23 | 13.11 | 0.00473 | 1.754386 | APOBEC3G;APOBEC3H;CCL4;CCL5;CCRS5;CD160;CD2;EOMES;ERBB2;FASLG;GFI1;KIR2DL1;KLRD1;KLRG1;LAG3  |
| greenyello BP | GO:0045069 | regulation of viral genome replication       | 17735 | 48   | 126 | 3  | 0.35  | 0.005   | 8.571429 | APOBEC3G;APOBEC3H;CCL5                                                                       |
| greenyello BP | GO:0035556 | intracellular signal transduction            | 17735 | 1936 | 126 | 24 | 13.98 | 0.00506 | 1.716738 | AGAP1;ARL4C;CCL4;CCL5;CCRS5;DLGS;DUSP8;EFNA5;ERBB2;F2R;FASLG;FZD4;NCAM1;NMUR1;PDGFRB;RAB7    |
| greenyello BP | GO:0032897 | negative regulation of viral transcripti...  | 17735 | 15   | 126 | 2  | 0.11  | 0.0051  | 18.18182 | CCL4;CCL5                                                                                    |
| greenyello BP | GO:2000403 | positive regulation of lymphocyte migrat...  | 17735 | 15   | 126 | 2  | 0.11  | 0.0051  | 18.18182 | CCL4;CCL5                                                                                    |
| greenyello BP | GO:0019932 | second-messenger-mediated signaling          | 17735 | 154  | 126 | 5  | 1.11  | 0.00516 | 4.504505 | CCL4;CCRS5;NCAM1;NMUR1;RCAN2                                                                 |
| greenyello BP | GO:0050896 | response to stimulus                         | 17735 | 6581 | 126 | 61 | 47.52 | 0.00542 | 1.28367  | ADAMTS1;AGAP1;APOBEC3G;APOBEC3H;ARL4C;BAI2;CCL4;CCL5;CCRS5;CD160;CD2;CHST10;CLIC3;CX3CR1;C   |
| greenyello BP | GO:0002717 | positive regulation of natural killer ce...  | 17735 | 16   | 126 | 2  | 0.12  | 0.0058  | 16.66667 | LAG3;SH2D1B                                                                                  |
| greenyello BP | GO:0050863 | regulation of T cell activation              | 17735 | 226  | 126 | 6  | 1.63  | 0.00592 | 3.680982 | CCL5;CD2;ERBB2;LAG3;PIK3R3;TIGIT                                                             |
| greenyello BP | GO:0061061 | muscle structure development                 | 17735 | 460  | 126 | 9  | 3.32  | 0.00604 | 2.710843 | CACNA2D2;ERBB2;F2R;MSC;NEB;PDGFRB;SGCD;SMAD7;WNT1                                            |
| greenyello BP | GO:0030217 | T cell differentiation                       | 17735 | 160  | 126 | 5  | 1.16  | 0.00605 | 4.310345 | CD2;EOMES;ERBB2;TBX21;WNT1                                                                   |
| greenyello BP | GO:0006816 | calcium ion transport                        | 17735 | 228  | 126 | 6  | 1.65  | 0.00617 | 3.636364 | CCL4;CCL5;CCRS5;F2R;NMUR1;PDGFRB                                                             |
| greenyello CC | GO:0000932 | cytoplasmic mRNA processing body             | 17735 | 51   | 126 | 3  | 0.37  | 0.00622 | 8.108108 | APOBEC3G;APOBEC3H;PATL2                                                                      |
| greenyello BP | GO:0065007 | biological regulation                        | 17735 | 8616 | 126 | 75 | 62.22 | 0.00637 | 1.2054   | ADAMTS1;AGAP1;APOBEC3G;APOBEC3H;ARL4C;BAI2;BNC2;CACNA2D2;CCL4;CCL5;CCRS5;CD160;CD2;CUC3;     |
| greenyello MF | GO:0043015 | gamma-tubulin binding                        | 17735 | 17   | 126 | 2  | 0.12  | 0.00665 | 16.66667 | FEZ1;RAB11FIP5                                                                               |
| greenyello BP | GO:0014706 | striated muscle tissue development           | 17735 | 306  | 126 | 7  | 2.21  | 0.00671 | 3.167421 | CACNA2D2;ERBB2;F2R;MSC;PDGFRB;SMAD7;WNT1                                                     |
| greenyello BP | GO:0043901 | negative regulation of multi-organism pr...  | 17735 | 54   | 126 | 3  | 0.39  | 0.00695 | 7.692308 | APOBEC3G;APOBEC3H;CCL5                                                                       |
| greenyello BP | GO:0014066 | regulation of phosphatidylinositol 3-kin...  | 17735 | 55   | 126 | 3  | 0.4   | 0.00731 | 7.5      | CCL5;F2R;PDGFRB                                                                              |
| greenyello BP | GO:0002407 | dendritic cell chemotaxis                    | 17735 | 18   | 126 | 2  | 0.13  | 0.00733 | 15.38462 | CCL5;CCRS5                                                                                   |
| greenyello BP | GO:0036314 | response to sterol                           | 17735 | 18   | 126 | 2  | 0.13  | 0.00733 | 15.38462 | CCRS5;PTCH1                                                                                  |
| greenyello BP | GO:0070723 | response to cholesterol                      | 17735 | 18   | 126 | 2  | 0.13  | 0.00733 | 15.38462 | CCRS5;PTCH1                                                                                  |
| greenyello BP | GO:0090342 | regulation of cell aging                     | 17735 | 18   | 126 | 2  | 0.13  | 0.00733 | 15.38462 | NUAK1;WNT1                                                                                   |
| greenyello BP | GO:0010810 | regulation of cell-substrate adhesion        | 17735 | 107  | 126 | 4  | 0.77  | 0.0075  | 5.194805 | EFNA5;FZD4;VIT;WNT1                                                                          |
| greenyello BP | GO:0070838 | divalent metal ion transport                 | 17735 | 238  | 126 | 6  | 1.72  | 0.00756 | 3.488372 | CCL4;CCL5;CCRS5;F2R;NMUR1;PDGFRB                                                             |
| greenyello BP | GO:0050792 | regulation of viral reproduction             | 17735 | 109  | 126 | 4  | 0.79  | 0.008   | 5.063291 | APOBEC3G;APOBEC3H;CCL4;CCL5                                                                  |
| greenyello BP | GO:0002715 | regulation of natural killer cell mediat...  | 17735 | 19   | 126 | 2  | 0.14  | 0.00815 | 14.28571 | LAG3;SH2D1B                                                                                  |
| greenyello BP | GO:0010714 | positive regulation of collagen metaboli...  | 17735 | 19   | 126 | 2  | 0.14  | 0.00815 | 14.28571 | F2R;PDGFRB                                                                                   |
| greenyello BP | GO:0032967 | positive regulation of collagen biosynth...  | 17735 | 19   | 126 | 2  | 0.14  | 0.00815 | 14.28571 | F2R;PDGFRB                                                                                   |
| greenyello BP | GO:0036336 | dendritic cell migration                     | 17735 | 19   | 126 | 2  | 0.14  | 0.00815 | 14.28571 | CCL5;CCRS5                                                                                   |
| greenyello BP | GO:0072511 | divalent inorganic cation transport          | 17735 | 242  | 126 | 6  | 1.75  | 0.00818 | 3.428571 | CCL4;CCL5;CCRS5;F2R;NMUR1;PDGFRB                                                             |
| greenyello BP | GO:0051336 | regulation of hydrolase activity             | 17735 | 755  | 126 | 12 | 5.45  | 0.00818 | 2.201835 | AGAP1;CCL5;EFNA5;ERBB2;F2R;FASLG;NMUR1;NUAK1;PDGFRB;PPP2R2B;SH3RF2;SYTL2                     |
| greenyello BP | GO:0040011 | locomotion                                   | 17735 | 1253 | 126 | 17 | 9.05  | 0.00818 | 1.878453 | CCL4;CCL5;CCRS5;CD2;CX3CR1;EFNA5;ERBB2;F2R;FEZ1;FZD4;NCAM1;PDGFRB;PDN;RASGEF1A;SMAD7;SPO1    |
| greenyello BP | GO:0060537 | muscle tissue development                    | 17735 | 318  | 126 | 7  | 2.3   | 0.00821 | 3.043478 | CACNA2D2;ERBB2;F2R;MSC;PDGFRB;SMAD7;WNT1                                                     |
| greenyello MF | GO:0005212 | structural constituent of eye lens           | 17735 | 19   | 126 | 2  | 0.14  | 0.00828 | 14.28571 | BFSP1;LIM2                                                                                   |
| greenyello BP | GO:0001775 | cell activation                              | 17735 | 758  | 126 | 12 | 5.47  | 0.00843 | 2.193784 | CCL5;CD2;EOMES;ERBB2;F2R;LAG3;PIK3R3;SH2D1B;SLAMF7;TBX21;TIGIT;WNT1                          |
| greenyello BP | GO:0072001 | renal system development                     | 17735 | 246  | 126 | 6  | 1.78  | 0.00883 | 3.370787 | ADAMTS1;MTSS1;PDGFRB;PTCH1;SMAD7;WNT1                                                        |
| greenyello BP | GO:0051707 | response to other organism                   | 17735 | 578  | 126 | 10 | 4.17  | 0.00891 | 2.398082 | APOBEC3G;APOBEC3H;CCL4;CCL5;CCRS5;F2R;FASLG;GFI1;GNLY;TBX21                                  |
| greenyello BP | GO:0016337 | cell-cell adhesion                           | 17735 | 405  | 126 | 8  | 2.92  | 0.009   | 2.739726 | CCL5;CD2;DLGS;EFNA5;NCAM1;PCDH1;SMAD7;WNT1                                                   |
| greenyello BP | GO:0043921 | modulation by host of viral transcriptio...  | 17735 | 20   | 126 | 2  | 0.14  | 0.00902 | 14.28571 | CCL4;CCL5                                                                                    |
| greenyello BP | GO:0052472 | modulation by host of symbiont transcrip...  | 17735 | 20   | 126 | 2  | 0.14  | 0.00902 | 14.28571 | CCL4;CCL5                                                                                    |
| greenyello BP | GO:2000401 | regulation of lymphocyte migration           | 17735 | 20   | 126 | 2  | 0.14  | 0.00902 | 14.28571 | CCL4;CCL5                                                                                    |
| greenyello BP | GO:0007519 | skeletal muscle tissue development           | 17735 | 179  | 126 | 5  | 1.29  | 0.00959 | 3.875969 | CACNA2D2;ERBB2;F2R;MSC;WNT1                                                                  |
| greenyello BP | GO:0035821 | modification of morphology or physiology...  | 17735 | 61   | 126 | 3  | 0.44  | 0.00972 | 6.818182 | CCL4;CCL5;GNLY                                                                               |
| greenyello BP | GO:0046135 | pyrimidine nucleoside catabolic process      | 17735 | 21   | 126 | 2  | 0.15  | 0.00992 | 13.33333 | APOBEC3G;APOBEC3H                                                                            |
| greenyello BP | GO:0052312 | modulation of transcription in other org...  | 17735 | 21   | 126 | 2  | 0.15  | 0.00992 | 13.33333 | CCL4;CCL5                                                                                    |
| greenyello BP | GO:0016311 | dephosphorylation                            | 17735 | 253  | 126 | 6  | 1.83  | 0.01005 | 3.278689 | DUSP8;NUAK1;PDGFRB;PPP2R2B;SH3RF2;SYTL2                                                      |

|               |             |                                             |       |       |     |    |       |         |           |                                                                                            |
|---------------|-------------|---------------------------------------------|-------|-------|-----|----|-------|---------|-----------|--------------------------------------------------------------------------------------------|
| greenyello BP | GO:0043270  | positive regulation of ion transport        | 17735 | 118   | 126 | 4  | 0.85  | 0.01051 | 4.705882  | CCL4;CCL5;F2R;PDGFRB                                                                       |
| greenyello BP | GO:0032965  | regulation of collagen biosynthetic proc... | 17735 | 22    | 126 | 2  | 0.16  | 0.01086 | 12.5      | F2R;PDGFRB                                                                                 |
| greenyello BP | GO:0048247  | lymphocyte chemotaxis                       | 17735 | 22    | 126 | 2  | 0.16  | 0.01086 | 12.5      | CCL4;CCL5                                                                                  |
| greenyello BP | GO:0006935  | chemotaxis                                  | 17735 | 596   | 126 | 10 | 4.3   | 0.0109  | 2.325581  | CCL4;CCL5;CCR5;CX3CR1;EFNA5;ERBB2;FEZ1;NCAM1;PDGFRB;SPON2                                  |
| greenyello BP | GO:0042330  | taxis                                       | 17735 | 596   | 126 | 10 | 4.3   | 0.0109  | 2.325581  | CCL4;CCL5;CCR5;CX3CR1;EFNA5;ERBB2;FEZ1;NCAM1;PDGFRB;SPON2                                  |
| greenyello BP | GO:0060538  | skeletal muscle organ development           | 17735 | 186   | 126 | 5  | 1.34  | 0.0112  | 3.731343  | CACNA2D2;ERBB2;F2R;MSC;WNT1                                                                |
| greenyello BP | GO:0010712  | regulation of collagen metabolic process    | 17735 | 23    | 126 | 2  | 0.17  | 0.01184 | 11.76471  | F2R;PDGFRB                                                                                 |
| greenyello MF | GO:0015026  | coreceptor activity                         | 17735 | 23    | 126 | 2  | 0.17  | 0.01202 | 11.76471  | CCR5;CXCR6                                                                                 |
| greenyello MF | GO:0043014  | alpha-tubulin binding                       | 17735 | 23    | 126 | 2  | 0.17  | 0.01202 | 11.76471  | ARL4C;NCALD                                                                                |
| greenyello BP | GO:0009607  | response to biotic stimulus                 | 17735 | 606   | 126 | 10 | 4.38  | 0.01215 | 2.283105  | APOBEC3G;APOBEC3H;CCL4;CCL5;CCR5;F2R;FASLG;GF1;GNLY;TBX21                                  |
| greenyello BP | GO:0045785  | positive regulation of cell adhesion        | 17735 | 124   | 126 | 4  | 0.9   | 0.01243 | 4.444444  | CCL5;ERBB2;SMAD7;VIT                                                                       |
| greenyello BP | GO:0050850  | positive regulation of calcium-mediated ... | 17735 | 24    | 126 | 2  | 0.17  | 0.01285 | 11.76471  | CCL4;NCAM1                                                                                 |
| greenyello BP | GO:0001906  | cell killing                                | 17735 | 68    | 126 | 3  | 0.49  | 0.01306 | 6.122449  | GNLY;LAG3;SLAMF7                                                                           |
| greenyello MF | GO:0005102  | receptor binding                            | 17735 | 1201  | 126 | 16 | 8.74  | 0.01317 | 1.830664  | BZRAP1;CCL4;CCL5;CD160;EFNA5;ERBB2;F2R;FASLG;JAKMIP1;LAG3;MTSS1;PDGFRB;PTCH1;SMAD7;TIGIT;W |
| greenyello BP | GO:0006950  | response to stress                          | 17735 | 2926  | 126 | 31 | 21.13 | 0.01366 | 1.467108  | APOBEC3G;APOBEC3H;CCL4;CCL5;CCR5;CD160;CD2;CX3CR1;ERBB2;F2R;FASLG;FZD4;GF1;GNLY;GPR68;KLR  |
| greenyello BP | GO:0044253  | positive regulation of multicellular org... | 17735 | 25    | 126 | 2  | 0.18  | 0.01391 | 11.111111 | F2R;PDGFRB                                                                                 |
| greenyello BP | GO:0050868  | negative regulation of T cell activation    | 17735 | 70    | 126 | 3  | 0.51  | 0.01412 | 5.882353  | ERBB2;LAG3;TIGIT                                                                           |
| greenyello BP | GO:0044699  | single-organism process                     | 17735 | 10656 | 126 | 87 | 76.95 | 0.01433 | 1.130604  | ADAMTS1;AGAP1;APOBEC3G;APOBEC3H;ARL4C;BAI2;BFSP1;CACNA2D2;CCL4;CCL5;CCR5;CD160;CD2;CEP78   |
| greenyello CC | GO:0031224  | intrinsic to membrane                       | 17735 | 5319  | 126 | 51 | 39.05 | 0.01434 | 1.306018  | B3GAT1;B3GNT7;BAI2;C14orf1;CACNA2D2;CCR5;CD160;CD2;CHST10;CLDN2;CLIC3;CX3CR1;CXCR6;EFNA5;  |
| greenyello CC | GO:0016020  | membrane                                    | 17735 | 7690  | 126 | 69 | 56.46 | 0.01452 | 1.222104  | ARL4C;B3GAT1;B3GNT7;BAI2;BFSP1;BNC2;C14orf1;CACNA2D2;CAMK2N1;CCR5;CD160;CD2;CHST10;CLDN2;  |
| greenyello BP | GO:00451924 | regulation of calcium ion transport         | 17735 | 130   | 126 | 4  | 0.94  | 0.01457 | 4.255319  | CCL4;CCL5;F2R;PDGFRB                                                                       |
| greenyello BP | GO:0018108  | peptidyl-tyrosine phosphorylation           | 17735 | 200   | 126 | 5  | 1.44  | 0.01494 | 3.472222  | CCL5;EFNA5;F2R;PDGFRB;ZFVVE28                                                              |
| greenyello BP | GO:0032496  | response to lipopolysaccharide              | 17735 | 200   | 126 | 5  | 1.44  | 0.01494 | 3.472222  | CCL5;CCR5;F2R;FASLG;GF1                                                                    |
| greenyello BP | GO:0006821  | chloride transport                          | 17735 | 26    | 126 | 2  | 0.19  | 0.01499 | 10.52632  | CLIC3;NMUR1                                                                                |
| greenyello BP | GO:0006904  | vesicle docking involved in exocytosis      | 17735 | 26    | 126 | 2  | 0.19  | 0.01499 | 10.52632  | NCAM1;SYTL2                                                                                |
| greenyello BP | GO:0014910  | regulation of smooth muscle cell migrati... | 17735 | 26    | 126 | 2  | 0.19  | 0.01499 | 10.52632  | CCL5;PDGFRB                                                                                |
| greenyello BP | GO:0051851  | modification by host of symbiont morphol... | 17735 | 26    | 126 | 2  | 0.19  | 0.01499 | 10.52632  | CCL4;CCL5                                                                                  |
| greenyello BP | GO:0055002  | striated muscle cell development            | 17735 | 132   | 126 | 4  | 0.95  | 0.01533 | 4.210526  | CACNA2D2;ERBB2;F2R;PDGFRB                                                                  |
| greenyello BP | GO:0007275  | multicellular organismal development        | 17735 | 3940  | 126 | 39 | 28.45 | 0.01533 | 1.370826  | ADAMTS1;BAI2;BFSP1;CACNA2D2;CD2;EDARADD;EFNA5;EOMES;ERBB2;F2R;FASLG;FEZ1;FZD4;GF1;GPR56;   |
| greenyello CC | GO:0005887  | integral to plasma membrane                 | 17735 | 1208  | 126 | 16 | 8.87  | 0.0154  | 1.803833  | CCR5;CD2;CX3CR1;CXCR6;F2R;FASLG;FZD4;GPR56;GPR68;KIR2DL1;KNG7;NMUR1;NPC1;PCDH1;PDGFRB;SYT  |
| greenyello BP | GO:0018212  | peptidyl-tyrosine modification              | 17735 | 202   | 126 | 5  | 1.46  | 0.01553 | 3.424658  | CCL4;CCL5;F2R;PDGFRB;ZFVVE28                                                               |
| greenyello BP | GO:0010518  | positive regulation of phospholipase act... | 17735 | 73    | 126 | 3  | 0.53  | 0.01579 | 5.660377  | CCL5;NMUR1;PDGFRB                                                                          |
| greenyello BP | GO:0019835  | cytolysis                                   | 17735 | 27    | 126 | 2  | 0.19  | 0.01612 | 10.52632  | GZMB;GZMH                                                                                  |
| greenyello MF | GO:0019239  | deaminase activity                          | 17735 | 27    | 126 | 2  | 0.2   | 0.01636 | 10        | APOBEC3G;APOBEC3H                                                                          |
| greenyello BP | GO:0002706  | regulation of lymphocyte mediated immuni... | 17735 | 75    | 126 | 3  | 0.54  | 0.01697 | 5.555556  | LAG3;SH2D1B;TBX21                                                                          |
| greenyello BP | GO:0001655  | urogenital system development               | 17735 | 285   | 126 | 6  | 2.06  | 0.01722 | 2.912621  | ADAMTS1;MTSS1;PDGFRB;PTCH1;SMAD7;WNT1                                                      |
| greenyello BP | GO:0032964  | collagen biosynthetic process               | 17735 | 28    | 126 | 2  | 0.2   | 0.01728 | 10        | F2R;PDGFRB                                                                                 |
| greenyello BP | GO:0042267  | natural killer cell mediated cytotoxici...  | 17735 | 28    | 126 | 2  | 0.2   | 0.01728 | 10        | LAG3;SLAMF7                                                                                |
| greenyello BP | GO:0048278  | vesicle docking                             | 17735 | 28    | 126 | 2  | 0.2   | 0.01728 | 10        | NCAM1;SYTL2                                                                                |
| greenyello BP | GO:0048015  | phosphatidylinositol-mediated signaling     | 17735 | 138   | 126 | 4  | 1     | 0.01776 | 4         | CCL5;ERBB2;F2R;PDGFRB                                                                      |
| greenyello BP | GO:0048017  | inositol lipid-mediated signaling           | 17735 | 138   | 126 | 4  | 1     | 0.01776 | 4         | CCL5;ERBB2;F2R;PDGFRB                                                                      |
| greenyello BP | GO:0045087  | innate immune response                      | 17735 | 550   | 126 | 9  | 3.97  | 0.01794 | 2.267003  | APOBEC3G;CCL5;GF1;KLRG1;LAG3;NCAM1;SH2D1B;SLAMF7;SPON2                                     |
| greenyello BP | GO:0050921  | positive regulation of chemotaxis           | 17735 | 77    | 126 | 3  | 0.56  | 0.01819 | 5.357143  | CCL4;CCL5;PDGFRB                                                                           |
| greenyello BP | GO:0002237  | response to molecule of bacterial origin    | 17735 | 211   | 126 | 5  | 1.52  | 0.0184  | 3.289474  | CCL5;CCR5;F2R;FASLG;GF1                                                                    |
| greenyello BP | GO:0044246  | regulation of multicellular organismal m... | 17735 | 30    | 126 | 2  | 0.22  | 0.0197  | 9.090909  | F2R;PDGFRB                                                                                 |
| greenyello BP | GO:0050776  | regulation of immune response               | 17735 | 560   | 126 | 9  | 4.04  | 0.01992 | 2.227723  | CCL5;CD160;GF1;KIR2DL1;KLRD1;KLRG1;LAG3;SH2D1B;TBX21                                       |
| greenyello MF | GO:0004435  | phosphatidylinositol phospholipase C act... | 17735 | 30    | 126 | 2  | 0.22  | 0.01999 | 9.090909  | CCL5;CCR5                                                                                  |
| greenyello BP | GO:0010517  | regulation of phospholipase activity        | 17735 | 80    | 126 | 3  | 0.58  | 0.02012 | 5.172414  | CCL5;NMUR1;PDGFRB                                                                          |
| greenyello BP | GO:0051146  | striated muscle cell differentiation        | 17735 | 216   | 126 | 5  | 1.56  | 0.02014 | 3.205128  | CACNA2D2;ERBB2;F2R;PDGFRB;WNT1                                                             |
| greenyello BP | GO:0060193  | positive regulation of lipase activity      | 17735 | 81    | 126 | 3  | 0.58  | 0.02079 | 5.172414  | CCL5;NMUR1;PDGFRB                                                                          |
| greenyello BP | GO:0014909  | smooth muscle cell migration                | 17735 | 31    | 126 | 2  | 0.22  | 0.02096 | 9.090909  | CCL5;PDGFRB                                                                                |
| greenyello BP | GO:0022409  | positive regulation of cell-cell adhesio... | 17735 | 31    | 126 | 2  | 0.22  | 0.02096 | 9.090909  | CCL5;SMAD7                                                                                 |
| greenyello BP | GO:0051702  | interaction with symbiont                   | 17735 | 31    | 126 | 2  | 0.22  | 0.02096 | 9.090909  | CCL4;CCL5                                                                                  |
| greenyello BP | GO:0072529  | pyrimidine-containing compound catabolic... | 17735 | 31    | 126 | 2  | 0.22  | 0.02096 | 9.090909  | APOBEC3G;APOBEC3H                                                                          |
| greenyello MF | GO:0004896  | cytokine receptor activity                  | 17735 | 81    | 126 | 3  | 0.59  | 0.02123 | 5.084746  | CCR5;CX3CR1;CXCR6                                                                          |
| greenyello BP | GO:2000021  | regulation of ion homeostasis               | 17735 | 147   | 126 | 4  | 1.06  | 0.02184 | 3.773585  | CCR5;F2R;SMAD7;YPEL1                                                                       |
| greenyello BP | GO:0031589  | cell-substrate adhesion                     | 17735 | 221   | 126 | 5  | 1.6   | 0.02199 | 3.125     | EFNA5;EPDR1;FZD4;VIT;WNT1                                                                  |
| greenyello BP | GO:0048856  | anatomical structure development            | 17735 | 3903  | 126 | 38 | 28.18 | 0.022   | 1.348474  | ADAMTS1;BAI2;BFSP1;CACNA2D2;CD2;EDARADD;EFNA5;EOMES;ERBB2;F2R;FASLG;FEZ1;FZD4;GF1;GPR56;   |
| greenyello BP | GO:1901701  | cellular response to oxygen-containing c... | 17735 | 387   | 126 | 7  | 2.79  | 0.02201 | 2.508961  | CCL5;CCR5;EFNA5;FZD4;GF1;PTCH1;PTGDR                                                       |
| greenyello BP | GO:0046131  | pyrimidine ribonucleoside metabolic proc... | 17735 | 32    | 126 | 2  | 0.23  | 0.02225 | 8.695652  | APOBEC3G;APOBEC3H                                                                          |
| greenyello CC | GO:0019897  | extrinsic to plasma membrane                | 17735 | 82    | 126 | 3  | 0.6   | 0.02247 | 5         | RGS9;SMAD7;SYTL2                                                                           |
| greenyello MF | GO:0004629  | phospholipase C activity                    | 17735 | 32    | 126 | 2  | 0.23  | 0.02258 | 8.695652  | CCL5;CCR5                                                                                  |
| greenyello MF | GO:0016814  | hydrolase activity, acting on carbon-nit... | 17735 | 32    | 126 | 2  | 0.23  | 0.02258 | 8.695652  | APOBEC3G;APOBEC3H                                                                          |
| greenyello BP | GO:0019058  | viral infectious cycle                      | 17735 | 223   | 126 | 5  | 1.61  | 0.02275 | 3.10559   | APOBEC3G;APOBEC3H;CCL4;CCL5;CXCR6                                                          |
| greenyello BP | GO:0060326  | cell chemotaxis                             | 17735 | 150   | 126 | 4  | 1.08  | 0.02332 | 3.703704  | CCL4;CCL5;CCR5;PDGFRB                                                                      |
| greenyello BP | GO:0010812  | negative regulation of cell-substrate ad... | 17735 | 33    | 126 | 2  | 0.24  | 0.02358 | 8.333333  | FZD4;WNT1                                                                                  |
| greenyello BP | GO:0021532  | neural tube patterning                      | 17735 | 33    | 126 | 2  | 0.24  | 0.02358 | 8.333333  | PTCH1;WNT1                                                                                 |
| greenyello MF | GO:0008378  | galactosyltransferase activity              | 17735 | 33    | 126 | 2  | 0.24  | 0.02393 | 8.333333  | B3GAT1;B3GNT7                                                                              |
| greenyello MF | GO:0015485  | cholesterol binding                         | 17735 | 33    | 126 | 2  | 0.24  | 0.02393 | 8.333333  | NPC1;PTCH1                                                                                 |

|               |            |                                             |       |      |      |    |       |          |          |                                                                                              |
|---------------|------------|---------------------------------------------|-------|------|------|----|-------|----------|----------|----------------------------------------------------------------------------------------------|
| greenyello BP | GO:0030098 | lymphocyte differentiation                  | 17735 | 226  | 126  | 5  | 1.63  | 0.02394  | 3.067485 | CD2;EOMES;ERBB2;TBX21;WNT1                                                                   |
| greenyello BP | GO:0044767 | single-organism developmental process       | 17735 | 3427 | 126  | 34 | 24.75 | 0.02449  | 1.373737 | ADAMT1;BAI2;BFSPI1;CACNA2D2;CD2;EDARADD;EFNA5;EOMES;ERBB2;F2R;FASLG;FEZ1;FZD4;GF11;GPR56;    |
| greenyello BP | GO:0022406 | membrane docking                            | 17735 | 34   | 126  | 2  | 0.25  | 0.02493  | 8        | NCAM1;SYTL2                                                                                  |
| greenyello BP | GO:0050848 | regulation of calcium-mediated signaling    | 17735 | 34   | 126  | 2  | 0.25  | 0.02493  | 8        | CCL4;NCAM1                                                                                   |
| greenyello BP | GO:0048520 | positive regulation of behavior             | 17735 | 88   | 126  | 3  | 0.64  | 0.02579  | 4.6875   | CCL4;CCL5;PDGFRB                                                                             |
| greenyello BP | GO:0000578 | embryonic axis specification                | 17735 | 35   | 126  | 2  | 0.25  | 0.02632  | 8        | PTCH1;WNT1                                                                                   |
| greenyello BP | GO:0014812 | muscle cell migration                       | 17735 | 35   | 126  | 2  | 0.25  | 0.02632  | 8        | CCL5;PDGFRB                                                                                  |
| greenyello BP | GO:0048741 | skeletal muscle fiber development           | 17735 | 89   | 126  | 3  | 0.64  | 0.02656  | 4.6875   | CACNA2D2;ERBB2;F2R                                                                           |
| greenyello CC | GO:0035770 | ribonucleoprotein granule                   | 17735 | 88   | 126  | 3  | 0.65  | 0.02698  | 4.615385 | APOBEC3G;APOBEC3H;PATL2                                                                      |
| greenyello BP | GO:0055001 | muscle cell development                     | 17735 | 157  | 126  | 4  | 1.13  | 0.02699  | 3.539823 | CACNA2D2;ERBB2;F2R;PDGFRB                                                                    |
| greenyello BP | GO:0033344 | cholesterol efflux                          | 17735 | 36   | 126  | 2  | 0.26  | 0.02774  | 7.692308 | NP1;PTCH1                                                                                    |
| greenyello BP | GO:0050730 | regulation of peptidyl-tyrosine phosphor... | 17735 | 159  | 126  | 4  | 1.15  | 0.0281   | 3.478261 | CCL5;EFNA5;PDGFRB;ZFVE28                                                                     |
| greenyello BP | GO:0050790 | regulation of catalytic activity            | 17735 | 1441 | 126  | 17 | 10.41 | 0.02886  | 1.633045 | AGAP1;CCL5;DUSP8;EFNA5;ERBB2;F2R;FASLG;FZD4;GF11;NMUR1;NUAK1;PDGFRB;PPP2R2B;SH3RF2;SMAD7     |
| greenyello BP | GO:0071222 | cellular response to lipopolysaccharide     | 17735 | 93   | 126  | 3  | 0.67  | 0.02973  | 4.477612 | CCL5;CCR5;GF11                                                                               |
| greenyello BP | GO:0002703 | regulation of leukocyte mediated immunit... | 17735 | 94   | 126  | 3  | 0.68  | 0.03055  | 4.411765 | LAG3;SH2D1B;TBX21                                                                            |
| greenyello MF | GO:0032934 | sterol binding                              | 17735 | 38   | 126  | 2  | 0.28  | 0.03112  | 7.142857 | NP1;PTCH1                                                                                    |
| greenyello BP | GO:0019220 | regulation of phosphate metabolic proces... | 17735 | 1233 | 126  | 15 | 8.9   | 0.03123  | 1.685393 | AGAP1;CCL5;DUSP8;EFNA5;ERBB2;F2R;FZD4;NUAK1;PDGFRB;PPP2R2B;SH3RF2;SMAD7;SYTL2;WNT1;ZFVE28    |
| greenyello BP | GO:0035567 | non-canonical Wnt receptor signaling pat... | 17735 | 39   | 126  | 2  | 0.28  | 0.03218  | 7.142857 | FZD4;WNT1                                                                                    |
| greenyello BP | GO:0048661 | positive regulation of smooth muscle cel... | 17735 | 39   | 126  | 2  | 0.28  | 0.03218  | 7.142857 | CCL5;PDGFRB                                                                                  |
| greenyello BP | GO:0051250 | negative regulation of lymphocyte activa... | 17735 | 96   | 126  | 3  | 0.69  | 0.03223  | 4.347826 | ERBB2;LAG3;TIGIT                                                                             |
| greenyello BP | GO:0045089 | positive regulation of innate immune res... | 17735 | 167  | 126  | 4  | 1.21  | 0.03282  | 3.305785 | CCL5;GF11;LAG3;SH2D1B                                                                        |
| greenyello BP | GO:0043525 | positive regulation of neuron apoptotic ... | 17735 | 40   | 126  | 2  | 0.29  | 0.03372  | 6.896552 | FASLG;PPP2R2B                                                                                |
| greenyello BP | GO:0051174 | regulation of phosphorus metabolic proce... | 17735 | 1246 | 126  | 15 | 9     | 0.03384  | 1.666667 | AGAP1;CCL5;DUSP8;EFNA5;ERBB2;F2R;FZD4;NUAK1;PDGFRB;PPP2R2B;SH3RF2;SMAD7;SYTL2;WNT1;ZFVE28    |
| greenyello BP | GO:0071219 | cellular response to molecule of bacteri... | 17735 | 98   | 126  | 3  | 0.71  | 0.03396  | 4.225352 | CCL5;CCR5;GF11                                                                               |
| greenyello BP | GO:0048513 | organ development                           | 17735 | 2404 | 126  | 25 | 17.36 | 0.0342   | 1.440092 | ADAMT1;BFSPI1;CACNA2D2;CD2;EDARADD;EOMES;ERBB2;F2R;FASLG;FZD4;GF11;GPR56;HOXC4;LDB2;LIM2     |
| greenyello BP | GO:0061005 | cell differentiation involved in kidney ... | 17735 | 41   | 126  | 2  | 0.3   | 0.03528  | 6.666667 | MTSS1;PTCH1                                                                                  |
| greenyello BP | GO:1901216 | positive regulation of neuron death         | 17735 | 41   | 126  | 2  | 0.3   | 0.03528  | 6.666667 | FASLG;PPP2R2B                                                                                |
| greenyello BP | GO:0002699 | positive regulation of immune effector p... | 17735 | 100  | 126  | 3  | 0.72  | 0.03574  | 4.166667 | LAG3;SH2D1B;TBX21                                                                            |
| greenyello CC | GO:0016021 | integral to membrane                        | 17735 | 5202 | 126  | 48 | 38.19 | 0.03621  | 1.256874 | B3GAT1;B3GNT7;BAI2;C14orf1;CACNA2D2;CCR5;CD2;CHST10;CLDN2;CLIC3;CX3CR1;CXCR6;EPHX4;ERBB2;I   |
| greenyello BP | GO:0048468 | cell development                            | 17735 | 1482 | 126  | 17 | 10.7  | 0.03642  | 1.588785 | BFSPI1;CACNA2D2;EFNA5;EOMES;ERBB2;F2R;FASLG;FEZ1;FZD4;GF11;LDB2;NCAM1;PDGFRB;PPP2R2B;S1PR5   |
| greenyello BP | GO:0042454 | ribonucleoside catabolic process            | 17735 | 431  | 126  | 7  | 3.11  | 0.0365   | 2.250804 | AGAP1;APOBEC3G;APOBEC3H;ARL4C;EFNA5;ERBB2;RAB7L1                                             |
| greenyello BP | GO:0007169 | transmembrane receptor protein tyrosine ... | 17735 | 625  | 126  | 9  | 4.51  | 0.03676  | 1.995565 | EFNA5;ERBB2;FASLG;FZD4;MTSS1;PDGFRB;PIK3R3;WNT1;ZFVE28                                       |
| greenyello BP | GO:0034109 | homotypic cell-cell adhesion                | 17735 | 42   | 126  | 2  | 0.3   | 0.03687  | 6.666667 | CCL5;NCAM1                                                                                   |
| greenyello BP | GO:0009617 | response to bacterium                       | 17735 | 341  | 126  | 6  | 2.46  | 0.03705  | 2.439024 | CCL5;CCR5;F2R;FASLG;GF11;GNLY                                                                |
| greenyello BP | GO:0032502 | developmental process                       | 17735 | 4437 | 126  | 41 | 32.04 | 0.03803  | 1.27965  | ADAMT1;BAI2;BFSPI1;CACNA2D2;CD2;EDARADD;EFNA5;EOMES;ERBB2;F2R;FASLG;FEZ1;FZD4;GF11;GPR56;    |
| greenyello BP | GO:0001657 | ureteric bud development                    | 17735 | 103  | 126  | 3  | 0.74  | 0.0385   | 4.054054 | PTCH1;WNT1                                                                                   |
| greenyello BP | GO:0050920 | regulation of chemotaxis                    | 17735 | 103  | 126  | 3  | 0.74  | 0.0385   | 4.054054 | CCL4;CCL5;PDGFRB                                                                             |
| greenyello BP | GO:0050900 | leukocyte migration                         | 17735 | 257  | 126  | 5  | 1.86  | 0.03851  | 2.688172 | CCL4;CCL5;CCR5;CD2;TBX21                                                                     |
| greenyello MF | GO:0030545 | receptor regulator activity                 | 17735 | 43   | 126  | 2  | 0.31  | 0.03905  | 6.451613 | CCL5;WNT1                                                                                    |
| greenyello BP | GO:0048514 | blood vessel morphogenesis                  | 17735 | 438  | 126  | 7  | 3.16  | 0.03927  | 2.21519  | BAI2;ERBB2;FASLG;FZD4;PDGFRB;SH2D2A;SMAD7                                                    |
| greenyello BP | GO:0048747 | muscle fiber development                    | 17735 | 104  | 126  | 3  | 0.75  | 0.03944  | 4        | CACNA2D2;ERBB2;F2R                                                                           |
| greenyello CC | GO:0005913 | cell-cell adherens junction                 | 17735 | 43   | 126  | 2  | 0.32  | 0.0397   | 6.25     | DLG5;SMAD7                                                                                   |
| greenyello BP | GO:0080134 | regulation of response to stress            | 17735 | 737  | 126  | 10 | 5.32  | 0.04012  | 1.879699 | APOBEC3G;CCL5;F2R;FZD4;GF11;LAG3;NP1;NUAK1;SH2D1B;WNT1                                       |
| greenyello BP | GO:0030101 | natural killer cell activation              | 17735 | 44   | 126  | 2  | 0.32  | 0.04014  | 6.25     | CD2;SLAMF7                                                                                   |
| greenyello BP | GO:0002449 | lymphocyte mediated immunity                | 17735 | 179  | 126  | 4  | 1.29  | 0.0407   | 3.100775 | LAG3;SH2D1B;SLAMF7;TBX21                                                                     |
| greenyello MF | GO:0019838 | growth factor binding                       | 17735 | 105  | 126  | 3  | 0.76  | 0.04121  | 3.947368 | ERBB2;FGFBP2;PDGFRB                                                                          |
| greenyello BP | GO:0007423 | sensory organ development                   | 17735 | 443  | 126  | 7  | 3.2   | 0.04134  | 2.1875   | BFSPI1;FASLG;FZD4;GF11;LIM2;PDGFRB;WNT1                                                      |
| greenyello BP | GO:0009164 | nucleoside catabolic process                | 17735 | 443  | 126  | 7  | 3.2   | 0.04134  | 2.1875   | AGAP1;APOBEC3G;APOBEC3H;ARL4C;EFNA5;ERBB2;RAB7L1                                             |
| greenyello MF | GO:0019904 | protein domain specific binding             | 17735 | 535  | 126  | 8  | 3.89  | 0.0414   | 2.056555 | FZD4;HOXC4;LDB2;LGL2;MTSS1;SH2D2A;WNT1;YWHAQ                                                 |
| greenyello BP | GO:0044087 | regulation of cellular component biogene... | 17735 | 351  | 126  | 6  | 2.53  | 0.04169  | 2.371542 | EFNA5;LDB2;MYO3B;NCAM1;PATL2;WNT1                                                            |
| greenyello BP | GO:0048010 | vascular endothelial growth factor recep... | 17735 | 45   | 126  | 2  | 0.32  | 0.04181  | 6.25     | FZD4;PDGFRB                                                                                  |
| greenyello BP | GO:0051817 | modification of morphology or physiology... | 17735 | 45   | 126  | 2  | 0.32  | 0.04181  | 6.25     | CCL4;CCL5                                                                                    |
| greenyello BP | GO:0009615 | response to virus                           | 17735 | 263  | 126  | 5  | 1.9   | 0.04185  | 2.631579 | APOBEC3G;APOBEC3H;CCL4;CCL5;TBX21                                                            |
| greenyello BP | GO:0060191 | regulation of lipase activity               | 17735 | 107  | 126  | 3  | 0.77  | 0.04233  | 3.896104 | CCL5;NMUR1;PDGFRB                                                                            |
| greenyello MF | GO:0005518 | collagen binding                            | 17735 | 46   | 126  | 2  | 0.33  | 0.04414  | 6.060606 | PODNL;SMAD7                                                                                  |
| greenyello MF | GO:0008009 | chemokine activity                          | 17735 | 47   | 126  | 2  | 0.34  | 0.04589  | 5.882353 | CCL4;CCL5                                                                                    |
| green BP      | GO:0071214 | cellular response to abiotic stimulus       | 17735 | 153  | 1060 | 23 | 9.5   | 7.00E-05 | 2.421053 | ATR;BAK1;BAX;CLOCK;EPO;FADD;GPLD1;HMGA2;HUS1;HYAL3;INSRR;ITGB1;LTBR;MAPK3;PDE2A;PIK3R1;PKI   |
| green BP      | GO:0009411 | response to UV                              | 17735 | 99   | 1060 | 17 | 6.15  | 0.00012  | 2.764228 | ATR;BAK1;BAX;BCL3;CASP7;CDKN2D;ELANE;ERCC4;ERCC6;HUS1;HYAL3;PIK3R1;TIPI1;TRIM32;USF1;USP47;V |
| green CC      | GO:0005922 | connexon complex                            | 17735 | 21   | 1060 | 7  | 1.27  | 0.00016  | 5.511811 | GJA4;GJB3;GJB5;GJB7;GJC1;GJC2;GJD4                                                           |
| green CC      | GO:0005921 | gap junction                                | 17735 | 31   | 1060 | 8  | 1.88  | 4.00E-04 | 4.255319 | GJA4;GJB3;GJB5;GJB7;GJC1;GJC2;GJD4;PANX2                                                     |
| green BP      | GO:0071478 | cellular response to radiation              | 17735 | 75   | 1060 | 13 | 4.66  | 0.00065  | 2.7897   | ATR;BAK1;BAX;CLOCK;HMGA2;HUS1;HYAL3;ITGB1;PIK3R1;RHOB;TSPYL5;USP47;YAP1                      |
| green BP      | GO:0009314 | response to radiation                       | 17735 | 305  | 1060 | 34 | 18.94 | 0.00067  | 1.795143 | AIPL1;ATR;BAK1;BAX;BCL3;CASP7;CDK5;CDKN2D;CLOCK;DRD3;DUSP1;ELANE;ERCC4;ERCC6;FANCD2;FKBP1;   |
| green BP      | GO:0071479 | cellular response to ionizing radiation     | 17735 | 33   | 1060 | 8  | 2.05  | 0.00074  | 3.902439 | ATR;CLOCK;HMGA2;HUS1;ITGB1;RHOB;TSPYL5;YAP1                                                  |
| green MF      | GO:0008417 | fucosyltransferase activity                 | 17735 | 14   | 1060 | 5  | 0.83  | 0.00094  | 6.024096 | CLASP2;FUT1;FUT3;FUT7;FUT8                                                                   |
| green BP      | GO:0009416 | response to light stimulus                  | 17735 | 208  | 1060 | 25 | 12.92 | 0.00116  | 1.934895 | AIPL1;ATR;BAK1;BAX;BCL3;CASP7;CDK5;CDKN2D;CLOCK;DRD3;DUSP1;ELANE;ERCC4;ERCC6;FOS;HUS1;HYAL   |
| green BP      | GO:2001235 | positive regulation of apoptotic signali... | 17735 | 36   | 1060 | 8  | 2.24  | 0.00137  | 3.571429 | BAX;CAMK2B;DEDD2;DNM1L;FADD;LTBR;PYCARD;TNFRSF12A                                            |
| green BP      | GO:0051053 | negative regulation of DNA metabolic pro... | 17735 | 64   | 1060 | 11 | 3.97  | 0.00179  | 2.770781 | ATR;ENPP7;ERCC4;HMGA2;HUS1;MRE11A;OTUB1;POSSA;SMC3;TERF1;TIPI1                               |
| green BP      | GO:0006974 | response to DNA damage stimulus             | 17735 | 608  | 1060 | 56 | 37.76 | 0.00194  | 1.483051 | ASCC3;ATAD5;ATMIN;ATR;ATXN3;BARD1;BAX;BCL3;C19orf40;CDC14B;CDKN2D;CLOCK;CTLA4;DDX1;ERCC4;I   |
| green BP      | GO:0008156 | negative regulation of DNA replication      | 17735 | 38   | 1060 | 8  | 2.36  | 0.00198  | 3.389831 | ATR;ENPP7;HUS1;MRE11A;PDS5A;SMC3;TERF1;TIPI1                                                 |

|       |    |            |                                             |       |      |      |     |       |         |          |                                                                                            |
|-------|----|------------|---------------------------------------------|-------|------|------|-----|-------|---------|----------|--------------------------------------------------------------------------------------------|
| green | CC | GO:0005694 | chromosome                                  | 17735 | 631  | 1060 | 56  | 38.19 | 0.00257 | 1.466352 | AR;ASF1B;ATR;CBX8;CENPC1;CLASP2;CLOCK;DCTN3;DYNC111;ERCC4;EXOSC4;FANCD2;HDAC2;HIST1H1C;HIS |
| green | BP | GO:0051928 | positive regulation of calcium ion trans... | 17735 | 58   | 1060 | 10  | 3.6   | 0.00278 | 2.777778 | ANK2;ARRB2;ATP2B2;BAK1;BAX;CACNB2;CASK;STIM2;TSPO;WNNK3                                    |
| green | CC | GO:0044427 | chromosomal part                            | 17735 | 538  | 1060 | 49  | 32.56 | 0.00279 | 1.504914 | AR;ASF1B;CBX8;CENPC1;CLASP2;DCTN3;DYNC111;ERCC4;EXOSC4;HDAC2;HIST1H1C;HIST1H2AD;HIST1H2BK; |
| green | CC | GO:0097060 | synaptic membrane                           | 17735 | 215  | 1060 | 24  | 13.01 | 0.0028  | 1.844735 | ANK2;ARRB2;CABP1;CASK;CDK5;CHRM4;CHRM5;CHRNA3;CNIH2;EPHA4;GABRD;GRIA4;GRID1;GRIK3;GRM4;    |
| green | BP | GO:0051248 | negative regulation of protein metabolic... | 17735 | 473  | 1060 | 45  | 29.37 | 0.00283 | 1.532176 | ARRB2;BAG5;BAK1;BANP;BAX;BCL3;CDC23;CDK5;DUSP1;EDNRB;EIF4EBP1;EIF4EBP3;ELANE;ERRF1;FBXO43; |
| green | BP | GO:0009628 | response to abiotic stimulus                | 17735 | 754  | 1060 | 66  | 46.82 | 0.00283 | 1.409654 | ADAM8;AGTRAP;AIPL1;ARRB2;ATP2B2;ATR;ATXN3;BAK1;BAX;BCL3;CASP7;CDK5;CDKN2D;CLOCK;CYP1A1;DI  |
| green | BP | GO:0046825 | regulation of protein export from nucleu... | 17735 | 24   | 1060 | 6   | 1.49  | 0.00289 | 4.026846 | BARD1;CDK5;PTPN11;PTPN14;SFN;XPO4                                                          |
| green | BP | GO:0007224 | smoothed signaling pathway                  | 17735 | 88   | 1060 | 13  | 5.46  | 0.00295 | 2.380952 | DISP1;FUZ;GLIS2;HES1;IHH;INTU;POR;RPGRP1L;SEPT2;SHOX2;TTBK2;TTC21B;WDR19                   |
| green | BP | GO:2001238 | positive regulation of extrinsic apoptot... | 17735 | 17   | 1060 | 5   | 1.06  | 0.00302 | 4.716981 | DEDD2;FADD;LTBR;PYCARD;TNFRSF12A                                                           |
| green | BP | GO:0034220 | ion transmembrane transport                 | 17735 | 296  | 1060 | 31  | 18.38 | 0.00303 | 1.686616 | ANK2;ATP2A1;ATP2B2;ATP6V0A2;ATP6V0B;BAK1;BAX;CACNB2;CASK;CASR;CDK5;CNIH2;CPT1B;DRD3;EPO;C  |
| green | CC | GO:0005911 | cell-cell junction                          | 17735 | 291  | 1060 | 30  | 17.61 | 0.00308 | 1.703578 | AMOT;AMOTL2;ANK2;CASK;CDH5;CLDN10;CLDN11;EPCAM;FAT1;GJA4;GJB3;GJB5;GJB7;GJC1;GJC2;GJD4;HP  |
| green | BP | GO:0032269 | negative regulation of cellular protein ... | 17735 | 411  | 1060 | 40  | 25.52 | 0.00319 | 1.567398 | ARRB2;BAG5;BAK1;BAX;CDC23;CDK5;DUSP1;EDNRB;EIF4EBP1;EIF4EBP3;ERRF1;GADD45G;GCLC;GPD1L;GRE  |
| green | BP | GO:0070230 | positive regulation of lymphocyte apopto... | 17735 | 11   | 1060 | 4   | 0.68  | 0.00343 | 5.882353 | ADAM8;BAX;NFKBID;ZC3H8                                                                     |
| green | CC | GO:0000228 | nuclear chromosome                          | 17735 | 294  | 1060 | 30  | 17.79 | 0.00358 | 1.686341 | AR;CBX8;CENPC1;ERCC4;HDAC2;HMG2A;HUS1;HUS1B;KIFAP3;LRPPRC;MORF4L1;NPM2;NR1H3;NUF1P1;ORC    |
| green | BP | GO:0071706 | tumor necrosis factor superfamily cytoki... | 17735 | 70   | 1060 | 11  | 4.35  | 0.00371 | 2.528726 | ADAM8;ARRB2;AZU1;BCL3;CARD9;FADD;PYCARD;RARA;THBS1;TSPO;ZC3H12A                            |
| green | BP | GO:0010458 | exit from mitosis                           | 17735 | 18   | 1060 | 5   | 1.12  | 0.00397 | 4.464286 | CDC23;NPM2;SIRT7;UBE2C;UBE25                                                               |
| green | BP | GO:2000649 | regulation of sodium ion transmembrane t... | 17735 | 18   | 1060 | 5   | 1.12  | 0.00397 | 4.464286 | DRD3;GPD1L;SCN1B;WNNK2;WNNK3                                                               |
| green | MF | GO:0016763 | transferase activity, transferring pento... | 17735 | 44   | 1060 | 8   | 2.62  | 0.00398 | 3.053435 | ARD1;MTAP;NAPRT1;PARP2;SIRT6;TNKS;UMPS;UPP1                                                |
| green | BP | GO:0022403 | cell cycle phase                            | 17735 | 852  | 1060 | 72  | 52.91 | 0.00445 | 1.368081 | ARL8A;AURKAIP1;B9D2;CAMK2B;CDC23;CDK6;CDKN2D;CENPC1;CENPJ;CEP192;CEP76;CLASP2;CYP1A1;DCTI  |
| green | BP | GO:0007193 | adenylate cyclase-inhibiting G-protein c... | 17735 | 43   | 1060 | 8   | 2.67  | 0.00446 | 2.996255 | APLP1;CHRM4;CHRM5;DRD3;GRIK3;GRM4;INSL3;SSTR2                                              |
| green | BP | GO:0003417 | growth plate cartilage development          | 17735 | 12   | 1060 | 4   | 0.75  | 0.00489 | 5.333333 | COL9A1;POR;RARA;THBS1                                                                      |
| green | BP | GO:0006446 | regulation of translational initiation      | 17735 | 53   | 1060 | 9   | 3.29  | 0.00495 | 2.735562 | DDX1;EIF1B;EIF2S1;EIF4EBP1;EIF4EBP3;NCBP1;NCBP2;RARA;TRMT6                                 |
| green | BP | GO:0010332 | response to gamma radiation                 | 17735 | 36   | 1060 | 7   | 2.24  | 0.00595 | 3.125    | ATR;BAK1;BAX;ERCC6;FANCD2;TSPYL5;YAP1                                                      |
| green | CC | GO:0044454 | nuclear chromosome part                     | 17735 | 255  | 1060 | 26  | 15.43 | 0.00646 | 1.685029 | AR;CBX8;CENPC1;ERCC4;HDAC2;HUS1;HUS1B;MORF4L1;NPM2;NR1H3;NUF1P1;ORC5;PCGF2;RAD50;RARA;R    |
| green | BP | GO:0042026 | protein refolding                           | 17735 | 13   | 1060 | 4   | 0.81  | 0.00672 | 4.938272 | BAG5;HSP90AA1;PDCL;PTGES3                                                                  |
| green | BP | GO:2000104 | negative regulation of DNA-dependent DNA... | 17735 | 13   | 1060 | 4   | 0.81  | 0.00672 | 4.938272 | MRE11A;SMC3;TERF1;TIPI1                                                                    |
| green | BP | GO:0032640 | tumor necrosis factor production            | 17735 | 66   | 1060 | 10  | 4.1   | 0.0072  | 2.439024 | ARRB2;AZU1;BCL3;CARD9;FADD;PYCARD;RARA;THBS1;TSPO;ZC3H12A                                  |
| green | BP | GO:0032680 | regulation of tumor necrosis factor prod... | 17735 | 66   | 1060 | 10  | 4.1   | 0.0072  | 2.439024 | ARRB2;AZU1;BCL3;CARD9;FADD;PYCARD;RARA;THBS1;TSPO;ZC3H12A                                  |
| green | CC | GO:0045211 | postsynaptic membrane                       | 17735 | 183  | 1060 | 20  | 11.08 | 0.00758 | 1.805054 | ANK2;ARRB2;CABP1;CASK;CHRM4;CHRM5;CHRNA3;CNIH2;EPHA4;GABRD;GRIA4;GRID1;GRIK3;HOMER3;HT     |
| green | BP | GO:0007049 | cell cycle                                  | 17735 | 1388 | 1060 | 108 | 86.2  | 0.00761 | 1.2529   | AFAP1L2;ARL8A;ATR;AURKAIP1;B9D2;BAK1;BANP;BARD1;BAX;BIN3;CAMK2B;CDC14B;CDC23;CDK5;CDK6;CC  |
| green | MF | GO:0005243 | gap junction channel activity               | 17735 | 14   | 1060 | 4   | 0.83  | 0.0077  | 4.819277 | GIB3;GJC1;GJC2;PANX2                                                                       |
| green | MF | GO:0005385 | zinc ion transmembrane transporter activ... | 17735 | 14   | 1060 | 4   | 0.83  | 0.0077  | 4.819277 | SLC30A4;SLC39A1;SLC39A4;SLC39A6                                                            |
| green | BP | GO:0050657 | nucleic acid transport                      | 17735 | 132  | 1060 | 16  | 8.2   | 0.00772 | 1.95122  | G3BP2;HNRNPA1L2;LRPPRC;MVP;NCBP1;NCBP2;NUP107;NUP160;NUP88;NXF3;RANBP2;SRSF9;TNKS;TST;U    |
| green | BP | GO:0050658 | RNA transport                               | 17735 | 132  | 1060 | 16  | 8.2   | 0.00772 | 1.95122  | G3BP2;HNRNPA1L2;LRPPRC;MVP;NCBP1;NCBP2;NUP107;NUP160;NUP88;NXF3;RANBP2;SRSF9;TNKS;TST;U    |
| green | BP | GO:0051236 | establishment of RNA localization           | 17735 | 132  | 1060 | 16  | 8.2   | 0.00772 | 1.95122  | G3BP2;HNRNPA1L2;LRPPRC;MVP;NCBP1;NCBP2;NUP107;NUP160;NUP88;NXF3;RANBP2;SRSF9;TNKS;TST;U    |
| green | BP | GO:0008589 | regulation of smoothed signaling pathw...   | 17735 | 47   | 1060 | 8   | 2.92  | 0.00777 | 2.739726 | DISP1;FUZ;GLIS2;IHH;INTU;POR;RPGRP1L;SHOX2                                                 |
| green | BP | GO:0033574 | response to testosterone stimulus           | 17735 | 21   | 1060 | 5   | 1.3   | 0.00807 | 3.846154 | DUSP1;EPO;MSTN;MTAP;TSPO                                                                   |
| green | BP | GO:0022402 | cell cycle process                          | 17735 | 1059 | 1060 | 85  | 65.76 | 0.00814 | 1.292579 | ARL8A;ATR;AURKAIP1;B9D2;BARD1;CAMK2B;CDC14B;CDC23;CDK5;CDK6;CDKN2D;CENPC1;CENPJ;CEP192;C   |
| green | BP | GO:0031400 | negative regulation of protein modificat... | 17735 | 317  | 1060 | 31  | 19.69 | 0.00819 | 1.574403 | ARRB2;BAG5;BAK1;BAX;CDC23;CDK5;DUSP1;ERRF1;GADD45G;GCLC;GPD1L;HEXIM2;HHATL;INPP5J;OTUB1;   |
| green | BP | GO:0000278 | mitotic cell cycle                          | 17735 | 777  | 1060 | 65  | 48.25 | 0.00834 | 1.34715  | AFAP1L2;ARL8A;AURKAIP1;B9D2;CAMK2B;CDC23;CDK6;CDKN2D;CENPC1;CENPJ;CEP192;CEP76;CLASP2;CYP  |
| green | CC | GO:0005814 | centriole                                   | 17735 | 59   | 1060 | 9   | 3.57  | 0.00861 | 2.521008 | CENPJ;CEP128;CEP192;CEP76;MPHOSPH9;POC1A;SDCCAG8;SPICE1;TTBK2                              |
| green | BP | GO:0016043 | cellular component organization             | 17735 | 4124 | 1060 | 288 | 256.1 | 0.00884 | 1.124561 | AASS;ADAM8;ADAMTS2;ADNP2;AMOT;ANK2;AP1M2;AP1S3;AP2S1;APLP1;AR;ARL8A;ARPC1B;ARRB2;ARTN;     |
| green | BP | GO:0006525 | arginine metabolic process                  | 17735 | 14   | 1060 | 4   | 0.87  | 0.00895 | 4.597701 | ASL;ASS1;DDAH2;FAH                                                                         |
| green | BP | GO:0033137 | negative regulation of peptidyl-serine p... | 17735 | 14   | 1060 | 4   | 0.87  | 0.00895 | 4.597701 | BAK1;BAX;GPD1L;INPP5J                                                                      |
| green | BP | GO:0010212 | response to ionizing radiation              | 17735 | 101  | 1060 | 13  | 6.27  | 0.00957 | 2.073363 | ATR;BAK1;BAX;CLOCK;ERCC6;FANCD2;HMG2A;HUS1;ITGB1;RHOB;RNF168;TSPYL5;YAP1                   |
| green | BP | GO:0045581 | negative regulation of T cell differenti... | 17735 | 22   | 1060 | 5   | 1.37  | 0.00992 | 3.649635 | CTLA4;HLX;IHH;NFKBID;ZC3H8                                                                 |
| green | BP | GO:0060351 | cartilage development involved in endoch... | 17735 | 22   | 1060 | 5   | 1.37  | 0.00992 | 3.649635 | COL9A1;POR;RARA;SHOX2;THBS1                                                                |
| green | BP | GO:0051028 | mRNA transport                              | 17735 | 114  | 1060 | 14  | 7.08  | 0.01096 | 1.977401 | G3BP2;HNRNPA1L2;LRPPRC;MVP;NCBP1;NCBP2;NUP107;NUP160;NUP88;NXF3;RANBP2;SRSF9;TNKS;UPF3E    |
| green | MF | GO:0008408 | 3'-5' exonuclease activity                  | 17735 | 33   | 1060 | 6   | 1.96  | 0.01212 | 3.061224 | EXD1;EXOSC4;ISG20;MRE11A;RAD50;WRN                                                         |
| green | BP | GO:0006403 | RNA localization                            | 17735 | 139  | 1060 | 16  | 8.63  | 0.01242 | 1.853998 | G3BP2;HNRNPA1L2;LRPPRC;MVP;NCBP1;NCBP2;NUP107;NUP160;NUP88;NXF3;RANBP2;SRSF9;TNKS;TST;U    |
| green | BP | GO:0000279 | M phase                                     | 17735 | 528  | 1060 | 46  | 32.79 | 0.01251 | 1.402867 | ARL8A;AURKAIP1;B9D2;CAMK2B;CDC23;CENPC1;CEP192;CLASP2;DCTN3;DPEP3;DRD3;EML4;ERCC4;FANCD    |
| green | BP | GO:0051726 | regulation of cell cycle                    | 17735 | 736  | 1060 | 61  | 45.71 | 0.01252 | 1.3345   | AFAP1L2;ATR;AURKAIP1;BAK1;BARD1;BAX;CAMK2B;CDC14B;CDC23;CDK5;CDK6;CDKN2D;CENPJ;CEP76;CLO   |
| green | CC | GO:0000784 | nuclear chromosome, telomeric region        | 17735 | 24   | 1060 | 5   | 1.45  | 0.01304 | 3.448276 | ERCC4;RAD50;SIRT6;TERF1;TNKS                                                               |
| green | BP | GO:0045862 | positive regulation of proteolysis          | 17735 | 62   | 1060 | 9   | 3.85  | 0.0138  | 2.337662 | ADAM8;AURKAIP1;GCLC;GPD1L;HDAC2;OGT;PACSIN3;PLK3;TRIM32                                    |
| green | CC | GO:0005604 | basement membrane                           | 17735 | 86   | 1060 | 11  | 5.21  | 0.01442 | 2.111324 | ANKA2P2;APLP1;CASK;COL18A1;COL4A2;FBLN1;ITGB1;LAD1;LAMA3;SMC3;TNC                          |
| green | BP | GO:0090003 | regulation of establishment of protein l... | 17735 | 24   | 1060 | 5   | 1.49  | 0.01444 | 3.355705 | AR;NRXN1;PIK3R1;RHOG;WNNK3                                                                 |
| green | BP | GO:0007004 | telomere maintenance via telomerase         | 17735 | 16   | 1060 | 4   | 0.99  | 0.01474 | 4.040404 | MRE11A;RAD50;TERF1;TNKS                                                                    |
| green | BP | GO:0042533 | tumor necrosis factor biosynthetic proce... | 17735 | 16   | 1060 | 4   | 0.99  | 0.01474 | 4.040404 | AZU1;BCL3;CARD9;THBS1                                                                      |
| green | BP | GO:0042534 | regulation of tumor necrosis factor bios... | 17735 | 16   | 1060 | 4   | 0.99  | 0.01474 | 4.040404 | AZU1;BCL3;CARD9;THBS1                                                                      |
| green | BP | GO:0090004 | positive regulation of establishment of ... | 17735 | 16   | 1060 | 4   | 0.99  | 0.01474 | 4.040404 | NRXN1;PIK3R1;RHOG;WNNK3                                                                    |
| green | BP | GO:2000108 | positive regulation of leukocyte apoptot... | 17735 | 16   | 1060 | 4   | 0.99  | 0.01474 | 4.040404 | ADAM8;BAX;NFKBID;ZC3H8                                                                     |
| green | CC | GO:0044456 | synapse part                                | 17735 | 353  | 1060 | 32  | 21.37 | 0.01475 | 1.497426 | AMPH;ANK2;ARRB2;CABP1;CASK;CDK5;CHRM4;CHRM5;CHRNA3;CNIH2;EPHA4;GABRD;GRIA4;GRID1;GRIK3;    |
| green | CC | GO:0000785 | chromatin                                   | 17735 | 300  | 1060 | 28  | 18.16 | 0.01518 | 1.54185  | AR;ASF1B;CBX8;CENPC1;EXOSC4;HDAC2;HIST1H1C;HIST1H2AD;HIST1H2BK;HIST1H2BO;HIST2H2AB;HMG2A   |
| green | MF | GO:0016247 | channel regulator activity                  | 17735 | 77   | 1060 | 10  | 4.58  | 0.01551 | 2.183406 | ANK2;GNB2;GPD1L;GPLD1;KCNJ12;NRXN1;PRKG1;SCN1B;SGK2;STIM2                                  |
| green | BP | GO:0031397 | negative regulation of protein ubiquitin... | 17735 | 96   | 1060 | 12  | 5.96  | 0.01556 | 2.013423 | ARRB2;BAG5;CDC23;CDK5;GCLC;OTUB1;PSMB10;PSMB8;PSMB9;PSMD5;PSME2;UBE2C                      |
| green | BP | GO:0000724 | double-strand break repair via homologou... | 17735 | 53   | 1060 | 8   | 3.29  | 0.0158  | 2.431611 | ERCC4;HUS1;MCM8;MORF4L1;MRE11A;RAD50;RAD52;SIRT6                                           |
| green | BP | GO:0000725 | recombinational repair                      | 17735 | 53   | 1060 | 8   | 3.29  | 0.0158  | 2.431611 | ERCC4;HUS1;MCM8;MORF4L1;MRE11A;RAD50;RAD52;SIRT6                                           |
| green | MF | GO:0001968 | fibronectin binding                         | 17735 | 17   | 1060 | 4   | 1.01  | 0.01588 | 3.960396 | FSTL3;ITGB1;MFAP2;THBS1                                                                    |
| green | BP | GO:0051168 | nuclear export                              | 17735 | 120  | 1060 | 14  | 7.45  | 0.01669 | 1.879195 | BAK1;CDK5;NCBP1;NCBP2;NUP107;NUP160;NXF3;PTPN11;PTPN14;SFN;SRSF9;UPF3B;XPO4;XPO7           |

|       |    |            |                                              |       |       |      |     |        |         |          |                                                                                            |
|-------|----|------------|----------------------------------------------|-------|-------|------|-----|--------|---------|----------|--------------------------------------------------------------------------------------------|
| green | BP | GO:0008334 | histone mRNA metabolic process               | 17735 | 25    | 1060 | 5   | 1.55   | 0.01715 | 3.225806 | EXOSC4;NCBP1;NCBP2;SSB;ZNF473                                                              |
| green | MF | GO:0072509 | divalent inorganic cation transmembrane ...  | 17735 | 138   | 1060 | 15  | 8.21   | 0.01724 | 1.82704  | ATP2A1;ATP2B2;CACNB2;CACNG1;ITPR1;MRS2;NIPAL2;PDE2A;SLC24A2;SLC30A4;SLC39A1;SLC39A4;SLC39A |
| green | CC | GO:0044424 | intracellular part                           | 17735 | 12103 | 1060 | 762 | 732.55 | 0.01736 | 1.040202 | AAGAB;AASS;ABCB7;ABHD11;ABHD5;ABTB1;ACAA1;ACAD11;ACOXL;ACSS3;ACTG2;ACVR2B;ADAM8;ADCK4;     |
| green | BP | GO:0030001 | metal ion transport                          | 17735 | 512   | 1060 | 44  | 31.8   | 0.01781 | 1.383648 | ADRA1A;ANK2;ARRB2;ATP2A1;ATP2B2;ATP6V0A2;ATP6V0B;ATP6V1G2;BAK1;BAX;CACNB2;CAMK2B;CASK;C    |
| green | CC | GO:0048471 | perinuclear region of cytoplasm              | 17735 | 469   | 1060 | 40  | 28.39  | 0.01802 | 1.408947 | ANK2;APL1;ARF5;ATP2A1;ATXN10;BAG5;BCL3;CABP1;CCIN;CLINT1;CTLA4;DCTN3;DNM1L;DOK1;DYNC1L1;F  |
| green | BP | GO:0003416 | endochondral bone growth                     | 17735 | 17    | 1060 | 4   | 1.06   | 0.01835 | 3.773585 | COL9A1;POR;RARA;THBS1                                                                      |
| green | BP | GO:0061001 | regulation of dendritic spine morphogene...  | 17735 | 17    | 1060 | 4   | 1.06   | 0.01835 | 3.773585 | CAMK2B;CDK5;EPHA4;SRCIN1                                                                   |
| green | MF | GO:0016175 | superoxide-generating NADPH oxidase acti...  | 17735 | 10    | 1060 | 3   | 0.59   | 0.01836 | 5.084746 | NCF1;NCF1B;NCF1C                                                                           |
| green | CC | GO:0003179 | proton-transporting V-type ATPase, V0 do...  | 17735 | 10    | 1060 | 3   | 0.61   | 0.01925 | 4.918033 | ATP6V0A2;ATP6V0B;TCIRG1                                                                    |
| green | BP | GO:0006275 | regulation of DNA replication                | 17735 | 99    | 1060 | 12  | 6.15   | 0.01946 | 1.95122  | ATR;ENPP7;EPO;HUS1;MRE11A;NPM2;PDS5A;PPP2CA;SMC3;TERF1;TIPIN;TNKS                          |
| green | BP | GO:0034644 | cellular response to UV                      | 17735 | 35    | 1060 | 6   | 2.17   | 0.01948 | 2.764977 | ATR;BAK1;BAX;HYAL3;PIK3R1;USP47                                                            |
| green | BP | GO:0071840 | cellular component organization or bioge...  | 17735 | 4237  | 1060 | 291 | 263.12 | 0.01987 | 1.105959 | AASS;ADAM8;ADAMTS2;ADNP2;AMOT;ANK2;AP1M2;AP1S3;AP2S1;APL1;AR;ARL8A;ARPC1B;ARRB2;ARTN;      |
| green | MF | GO:0046915 | transition metal ion transmembrane trans...  | 17735 | 27    | 1060 | 5   | 1.61   | 0.01991 | 3.10559  | SLC30A4;SLC31A2;SLC39A1;SLC39A4;SLC39A6                                                    |
| green | BP | GO:0051897 | positive regulation of protein kinase B ...  | 17735 | 66    | 1060 | 9   | 4.1    | 0.02023 | 2.195122 | ADAM8;ARRB2;F3;KIAA1161;MEIS3;MTDH;RARA;THBS1;TSPYL5                                       |
| green | BP | GO:0010564 | regulation of cell cycle process             | 17735 | 434   | 1060 | 38  | 26.95  | 0.0203  | 1.410019 | ATR;AURKAIP1;CAMK2B;CDC14B;CDC23;CDK5;CENPJ;CEP76;CLOCK;CSPP1;CYP1A1;DRD3;FBXO43;HMG2A;+   |
| green | BP | GO:0008635 | activation of cysteine-type endopeptidas...  | 17735 | 10    | 1060 | 3   | 0.62   | 0.02061 | 4.83871  | BAK1;BAX;CASP7                                                                             |
| green | BP | GO:0010225 | response to UV-C                             | 17735 | 10    | 1060 | 3   | 0.62   | 0.02061 | 4.83871  | BAK1;BCL3;WRN                                                                              |
| green | BP | GO:0036065 | fucosylation                                 | 17735 | 10    | 1060 | 3   | 0.62   | 0.02061 | 4.83871  | FUT3;FUT7;FUT8                                                                             |
| green | BP | GO:0050665 | hydrogen peroxide biosynthetic process       | 17735 | 10    | 1060 | 3   | 0.62   | 0.02061 | 4.83871  | CYP1A1;NCF1;ZNF205                                                                         |
| green | BP | GO:0051918 | negative regulation of fibrinolysis          | 17735 | 10    | 1060 | 3   | 0.62   | 0.02061 | 4.83871  | THBD;THBS1;USF1                                                                            |
| green | BP | GO:0070841 | inclusion body assembly                      | 17735 | 10    | 1060 | 3   | 0.62   | 0.02061 | 4.83871  | BAG5;TRIM37;UBD                                                                            |
| green | CC | GO:0046930 | pore complex                                 | 17735 | 91    | 1060 | 11  | 5.51   | 0.02127 | 1.99637  | BAK1;BAX;CSE1L;IPO7;MVP;NUP107;NUP160;NUP88;RANBP2;TNKS;XPOT                               |
| green | CC | GO:0044420 | extracellular matrix part                    | 17735 | 177   | 1060 | 18  | 10.71  | 0.02148 | 1.680672 | ANXA2P2;APLP1;CASK;COL16A1;COL18A1;COL23A1;COL4A2;COL9A1;FBLN1;FCN2;GLDN;ITGB1;LAD1;LAMA   |
| green | BP | GO:2001233 | regulation of apoptotic signaling pathwa...  | 17735 | 78    | 1060 | 10  | 4.84   | 0.02209 | 2.066116 | BAK1;BAX;CAMK2B;DEDD2;DNM1L;FADD;LTRB;PYCARD;TNFRSF12A;ZNF205                              |
| green | BP | GO:0030194 | positive regulation of blood coagulation     | 17735 | 18    | 1060 | 4   | 1.12   | 0.02246 | 3.571429 | F3;THBD;THBS1;USF1                                                                         |
| green | BP | GO:0045880 | positive regulation of smoothened signal...  | 17735 | 18    | 1060 | 4   | 1.12   | 0.02246 | 3.571429 | DISP1;IHH;POR;SHOX2                                                                        |
| green | BP | GO:0070059 | intrinsic apoptotic signaling pathway in ... | 17735 | 18    | 1060 | 4   | 1.12   | 0.02246 | 3.571429 | ATP2A1;BAK1;BAX;ITPR1                                                                      |
| green | BP | GO:1900048 | positive regulation of hemostasis            | 17735 | 18    | 1060 | 4   | 1.12   | 0.02246 | 3.571429 | F3;THBD;THBS1;USF1                                                                         |
| green | MF | GO:0032947 | protein complex scaffold                     | 17735 | 48    | 1060 | 7   | 2.85   | 0.02246 | 2.45614  | ARRB2;CD3G;DEDD2;G3BP2;KSR2;RGS14;SEPT2                                                    |
| green | BP | GO:0000087 | M phase of mitotic cell cycle                | 17735 | 370   | 1060 | 33  | 22.98  | 0.02305 | 1.436031 | ARL8A;AURKAIP1;B9D2;CDC23;CENPC1;CLASP2;DCTN3;DRD3;EML4;HAUS2;HMG2A;MASTL;MPHOSPH9;NEI     |
| green | MF | GO:0005158 | insulin receptor binding                     | 17735 | 28    | 1060 | 5   | 1.67   | 0.02309 | 2.994012 | DOK1;DOK6;INSL3;PIK3R1;PTPN11                                                              |
| green | BP | GO:0000041 | transition metal ion transport               | 17735 | 90    | 1060 | 11  | 5.59   | 0.02331 | 1.9678   | ATP6V0A2;ATP6V0B;ATP6V1G2;CP;FTH1;SLC30A4;SLC31A2;SLC39A1;SLC39A6;TCIRG1;TCN1              |
| green | MF | GO:0017080 | sodium channel regulator activity            | 17735 | 19    | 1060 | 4   | 1.13   | 0.02353 | 3.539823 | GPDL1;GPLD1;SCN1B;SGK2                                                                     |
| green | MF | GO:0030159 | receptor signaling complex scaffold acti...  | 17735 | 19    | 1060 | 4   | 1.13   | 0.02353 | 3.539823 | CD3G;DEDD2;G3BP2;RGS14                                                                     |
| green | BP | GO:0045931 | positive regulation of mitotic cell cycl...  | 17735 | 37    | 1060 | 6   | 2.3    | 0.02514 | 2.608696 | CYP1A1;EIF4EBP1;HEI1;SMAD6;SPHK1;TERF1                                                     |
| green | CC | GO:0016234 | inclusion body                               | 17735 | 38    | 1060 | 6   | 2.3    | 0.02539 | 2.608696 | AFAP1L2;ATXN3;BAG5;RANBP2;TRIM37;UBD                                                       |
| green | BP | GO:0006942 | regulation of striated muscle contractio...  | 17735 | 58    | 1060 | 8   | 3.6    | 0.02609 | 2.222222 | ADRA1A;ANK2;ATP2A1;GJC1;GPDL1;MYBPC3;RGS2;SCN1B                                            |
| green | BP | GO:0006643 | membrane lipid metabolic process             | 17735 | 164   | 1060 | 17  | 10.18  | 0.02618 | 1.669941 | ARL1;BAX;CERS1;CERS4;CERS5;ENPP7;GPLD1;KDSR;MPPE1;PGAP2;PIGN;PIGX;PPAP2A;PPP2CA;SMPDL3B;SP |
| green | MF | GO:0016859 | cis-trans isomerase activity                 | 17735 | 39    | 1060 | 6   | 2.32   | 0.02643 | 2.586207 | CWC2;FKBP14;FKBP1;GSTZ1;NKTR;RANBP2                                                        |
| green | CC | GO:0005930 | axoneme                                      | 17735 | 71    | 1060 | 9   | 4.3    | 0.02689 | 2.093023 | B9D2;DNAH2;DNAH9;DYNC2H1;RPGRIPI1;RPGRIPL1;SPAG6;SPEF1;TTC21B                              |
| green | CC | GO:0043229 | intracellular organelle                      | 17735 | 10522 | 1060 | 666 | 636.86 | 0.02698 | 1.045756 | AASS;ABCB7;ABHD11;ABTB1;ACAA1;ACAD11;ACOXL;ACSS3;ACTG2;ADAM8;ADCK4;ADNP2;ADRA1A;AFAP1L     |
| green | BP | GO:0006020 | inositol metabolic process                   | 17735 | 11    | 1060 | 3   | 0.68   | 0.02705 | 4.411765 | IMPA2;IPPK;ITPKA                                                                           |
| green | BP | GO:0006222 | UMP biosynthetic process                     | 17735 | 11    | 1060 | 3   | 0.68   | 0.02705 | 4.411765 | UMPS;UPP1;UPRT                                                                             |
| green | BP | GO:0009173 | pyrimidine ribonucleoside monophosphate ...  | 17735 | 11    | 1060 | 3   | 0.68   | 0.02705 | 4.411765 | UMPS;UPP1;UPRT                                                                             |
| green | BP | GO:0009174 | pyrimidine ribonucleoside monophosphate ...  | 17735 | 11    | 1060 | 3   | 0.68   | 0.02705 | 4.411765 | UMPS;UPP1;UPRT                                                                             |
| green | BP | GO:0010954 | positive regulation of protein processin...  | 17735 | 11    | 1060 | 3   | 0.68   | 0.02705 | 4.411765 | ADAM8;CNTN2;HPN                                                                            |
| green | BP | GO:0030205 | dermatan sulfate metabolic process           | 17735 | 11    | 1060 | 3   | 0.68   | 0.02705 | 4.411765 | BCAN;CSPG5;UST                                                                             |
| green | BP | GO:0030208 | dermatan sulfate biosynthetic process        | 17735 | 11    | 1060 | 3   | 0.68   | 0.02705 | 4.411765 | BCAN;CSPG5;UST                                                                             |
| green | BP | GO:0046049 | UMP metabolic process                        | 17735 | 11    | 1060 | 3   | 0.68   | 0.02705 | 4.411765 | UMPS;UPP1;UPRT                                                                             |
| green | BP | GO:0070243 | regulation of thymocyte apoptotic proces...  | 17735 | 11    | 1060 | 3   | 0.68   | 0.02705 | 4.411765 | ADAM8;NFKBID;ZC3H8                                                                         |
| green | BP | GO:0009303 | rRNA transcription                           | 17735 | 19    | 1060 | 4   | 1.18   | 0.02709 | 3.389831 | GTF3C3;RNASEK;SIRT7;TAF1B                                                                  |
| green | BP | GO:0033081 | regulation of T cell differentiation in ...  | 17735 | 19    | 1060 | 4   | 1.18   | 0.02709 | 3.389831 | ADAM8;IHH;NFKBID;ZC3H8                                                                     |
| green | BP | GO:0086002 | regulation of cardiac muscle cell action...  | 17735 | 19    | 1060 | 4   | 1.18   | 0.02709 | 3.389831 | ANK2;GJC1;GPLD1;SCN1B                                                                      |
| green | BP | GO:0010822 | positive regulation of mitochondrion org...  | 17735 | 28    | 1060 | 5   | 1.74   | 0.02723 | 2.873563 | BAK1;BAX;DNM1L;PYCARD;ZNF205                                                               |
| green | BP | GO:2001236 | regulation of extrinsic apoptotic signal...  | 17735 | 28    | 1060 | 5   | 1.74   | 0.02723 | 2.873563 | DEDD2;FADD;LTRB;PYCARD;TNFRSF12A                                                           |
| green | MF | GO:0042578 | phosphoric ester hydrolase activity          | 17735 | 351   | 1060 | 30  | 20.88  | 0.02919 | 1.436782 | ACPT;CASR;CDC14B;CHRM5;DUSP1;ENPP7;EPM2A;GPLD1;IMPA2;INPP4B;INPP5F;INPP5J;LPPR4;MPPE1;MTI  |
| green | BP | GO:0090257 | regulation of muscle system process          | 17735 | 129   | 1060 | 14  | 8.01   | 0.02926 | 1.747815 | ADRA1A;ANK2;ATP2A1;CAMK2B;CHRNA3;GJC1;GPDL1;MSTN;MYBPC3;NCF1;RGS2;SCN1B;SPHK1;SSTR2        |
| green | CC | GO:0044441 | cilium part                                  | 17735 | 120   | 1060 | 13  | 7.26   | 0.02957 | 1.790634 | B9D2;CASK;CLTB;DNAH2;DNAH9;DYNC2H1;ROM1;RPGRIPL1;SEPT2;SPEF1;TSPPEAR;TTBK2;TTC21E          |
| green | BP | GO:0015931 | nucleobase-containing compound transport     | 17735 | 154   | 1060 | 16  | 9.56   | 0.0298  | 1.67364  | G3BP2;HNRNPA1L2;LRPPRC;MVP;NCBP1;NCBP2;NUP107;NUP160;NUP88;NXF3;RANBP2;SRF9P9;TNKS;TST;U   |
| green | MF | GO:0003707 | steroid hormone receptor activity            | 17735 | 51    | 1060 | 7   | 3.03   | 0.03032 | 2.310231 | AR;ESRRA;ESRRB;NR1H3;NR2C2;PGRMC2;RARA                                                     |
| green | CC | GO:0043226 | organelle                                    | 17735 | 10552 | 1060 | 667 | 638.68 | 0.03047 | 1.044341 | AASS;ABCB7;ABHD11;ABTB1;ACAA1;ACAD11;ACOXL;ACSS3;ACTG2;ADAM8;ADCK4;ADNP2;ADRA1A;AFAP1L     |
| green | MF | GO:0015267 | channel activity                             | 17735 | 395   | 1060 | 33  | 23.49  | 0.03061 | 1.404853 | ANO2;AOC3;AQP8;BAX;CACNB2;CACNG1;CHRNA3;CLCN1;CLIC5;GABRD;GJB3;GJC1;GJC2;GRIA4;GRID1;GRIK  |
| green | MF | GO:0022803 | passive transmembrane transporter activi...  | 17735 | 395   | 1060 | 33  | 23.49  | 0.03061 | 1.404853 | ANO2;AOC3;AQP8;BAX;CACNB2;CACNG1;CHRNA3;CLCN1;CLIC5;GABRD;GJB3;GJC1;GJC2;GRIA4;GRID1;GRIK  |
| green | MF | GO:0008191 | metalloendopeptidase inhibitor activity      | 17735 | 12    | 1060 | 3   | 0.71   | 0.0308  | 4.225352 | RECK;SPOCK3;WFIKKN2                                                                        |
| green | MF | GO:0048551 | metalloenzyme inhibitor activity             | 17735 | 12    | 1060 | 3   | 0.71   | 0.0308  | 4.225352 | RECK;SPOCK3;WFIKKN2                                                                        |
| green | BP | GO:0048814 | regulation of dendrite morphogenesis         | 17735 | 39    | 1060 | 6   | 2.42   | 0.03179 | 2.479339 | CAMK2B;CDK5;CHRNA3;EPHA4;SDC2;SRCIN1                                                       |
| green | BP | GO:0051216 | cartilage development                        | 17735 | 168   | 1060 | 17  | 10.43  | 0.03207 | 1.629914 | BMPRI1B;COL9A1;ESRRA;FGF18;FOXO4L1;GPLD1;HMG2A;HYAL3;IHH;LUM;MAPK3;NFIB;POR;RARA;SHOX2;T   |
| green | CC | GO:0008278 | cohesin complex                              | 17735 | 12    | 1060 | 3   | 0.73   | 0.03224 | 4.109589 | SGOL1;SMC1B;SMC3                                                                           |
| green | BP | GO:0050820 | positive regulation of coagulation           | 17735 | 20    | 1060 | 4   | 1.24   | 0.03224 | 3.225806 | F3;THBD;THBS1;USF1                                                                         |

|       |    |            |                                             |       |       |      |     |        |         |          |                                                                                              |
|-------|----|------------|---------------------------------------------|-------|-------|------|-----|--------|---------|----------|----------------------------------------------------------------------------------------------|
| green | BP | GO:0051329 | interphase of mitotic cell cycle            | 17735 | 408   | 1060 | 35  | 25.34  | 0.03268 | 1.381215 | CAMK2B;CDC23;CDK6;CDKN2D;CENPJ;CEP192;CEP76;CYP1A1;DCTN3;DNAJC2;EIF4EBP1;HAUS2;HMG2A;HSI     |
| green | BP | GO:1901654 | response to ketone                          | 17735 | 72    | 1060 | 9   | 4.47   | 0.03355 | 2.013423 | DUSP1;EPO;FOS;MSTN;MTAP;NR1H3;SLIT3;THBS1;TSPO                                               |
| green | CC | GO:0005634 | nucleus                                     | 17735 | 5873  | 1060 | 383 | 355.47 | 0.03372 | 1.077447 | ABTB1;ACAD11;ADNP2;ADRA1A;AFAP1L2;AIPL1;AMOT;ANKRD42;ANO2;AR;ARL2BP;ARRB2;ASCC3;ASF1B;A      |
| green | BP | GO:0006907 | pinocytosis                                 | 17735 | 12    | 1060 | 3   | 0.75   | 0.03444 | 4        | NR1H3;PYCARD;SNX5                                                                            |
| green | BP | GO:0007158 | neuron cell-cell adhesion                   | 17735 | 12    | 1060 | 3   | 0.75   | 0.03444 | 4        | CTNND2;NIN2J;NRXN1                                                                           |
| green | BP | GO:0032469 | endoplasmic reticulum calcium ion homeos... | 17735 | 12    | 1060 | 3   | 0.75   | 0.03444 | 4        | ATP2A1;BAK1;BAX                                                                              |
| green | BP | GO:0045346 | regulation of MHC class II biosynthetic ... | 17735 | 12    | 1060 | 3   | 0.75   | 0.03444 | 4        | AZU1;HDAC2;SPI1                                                                              |
| green | BP | GO:0070242 | thymocyte apoptotic process                 | 17735 | 12    | 1060 | 3   | 0.75   | 0.03444 | 4        | ADAM8;NFKBID;ZC3H8                                                                           |
| green | BP | GO:0022607 | cellular component assembly                 | 17735 | 1545  | 1060 | 113 | 95.94  | 0.03455 | 1.177819 | AASS;AMOT;AP251;AR;ARPC1B;ASF1B;ATL1;ATPAF1;B9D2;BAG5;BAX;BIN3;CAND1;CD151;CD3G;CDH5;CDK     |
| green | BP | GO:0042116 | macrophage activation                       | 17735 | 40    | 1060 | 6   | 2.48   | 0.03551 | 2.419355 | AZU1;NR1H3;PRKCE;THBS1;TYROBP;ZC3H12A                                                        |
| green | CC | GO:0005622 | intracellular                               | 17735 | 12344 | 1060 | 772 | 747.14 | 0.03559 | 1.033274 | AAGAB;AASS;ABCB7;ABHD11;ABHD5;ABTB1;ACAA1;ACAD11;ACOXL;ACSS3;ACTG2;ACVR2B;ADAD2;ADAM8;       |
| green | BP | GO:0032508 | DNA duplex unwinding                        | 17735 | 30    | 1060 | 5   | 1.86   | 0.03568 | 2.688172 | ASCC3;DDX1;MRE11A;RAD50;WRN                                                                  |
| green | BP | GO:0070509 | calcium ion import                          | 17735 | 30    | 1060 | 5   | 1.86   | 0.03568 | 2.688172 | ATP2A1;CACNB2;CASK;CASR;CDK5                                                                 |
| green | BP | GO:0000086 | G2/M transition of mitotic cell cycle       | 17735 | 145   | 1060 | 15  | 9      | 0.03578 | 1.666667 | CENPJ;CEP192;CEP76;DCTN3;HAUS2;HMG2A;HSP90AA1;MASTL;PLK3;SDCCAG8;TERF1;TIPIN;TUBA1A;TUBA     |
| green | BP | GO:0032844 | regulation of homeostatic process           | 17735 | 275   | 1060 | 25  | 17.08  | 0.03594 | 1.4637   | ADAM8;ANK2;BAK1;BAX;CDK6;DRD3;EDNRB;ERCC4;FOXO1;GCLC;GPD1L;GLP1L;ITPR1;NR1H3;PRKCE;SCN1E     |
| green | CC | GO:0000781 | chromosome, telomeric region                | 17735 | 52    | 1060 | 7   | 3.15   | 0.03616 | 2.222222 | ERCC4;MRE11A;PTGES3;RAD50;SIRT6;TERF1;TNKS                                                   |
| green | CC | GO:0035085 | cilium axoneme                              | 17735 | 52    | 1060 | 7   | 3.15   | 0.03616 | 2.222222 | B9D2;DNAH2;DNAH9;DYNC2H1;RPGRIIP1L;SPEF1;TTC21B                                              |
| green | CC | GO:0097014 | microtubule-based flagellar cytoplasm       | 17735 | 52    | 1060 | 7   | 3.15   | 0.03616 | 2.222222 | B9D2;DNAH2;DNAH9;DYNC2H1;RPGRIIP1L;SPEF1;TTC21B                                              |
| green | CC | GO:0005643 | nuclear pore                                | 17735 | 75    | 1060 | 9   | 4.54   | 0.0367  | 1.982379 | CSE1L;IPO7;MVP;NUP107;NUP160;NUP88;RANBP2;TNKS;XPOT                                          |
| green | BP | GO:0032412 | regulation of ion transmembrane transpor... | 17735 | 85    | 1060 | 10  | 5.28   | 0.0374  | 1.893939 | ANK2;CNIH2;DRD3;EPO;GPD1L;NRXN1;SCN1B;STM2;WNN2;WNN3                                         |
| green | BP | GO:0046467 | membrane lipid biosynthetic process         | 17735 | 97    | 1060 | 11  | 6.02   | 0.03784 | 1.827243 | CERS1;CERS4;CERS6;KDSR;MPPE1;PGAP2;PIGN;PIGX;PPAP2A;SPH1;ST8SIA1                             |
| green | BP | GO:0006278 | RNA-dependent DNA replication               | 17735 | 21    | 1060 | 4   | 1.3    | 0.03793 | 3.076923 | MRE11A;RAD50;TERF1;TNKS                                                                      |
| green | BP | GO:0006471 | protein ADP-ribosylation                    | 17735 | 21    | 1060 | 4   | 1.3    | 0.03793 | 3.076923 | ART1;PARP2;SIRT6;TNKS                                                                        |
| green | CC | GO:0031514 | motile cilium                               | 17735 | 137   | 1060 | 14  | 8.29   | 0.03793 | 1.688782 | B9D2;CASK;CLTB;DNAH2;DNAH9;DYNC2H1;ROM1;RPGRIIP1L;SEPT2;SPEF1;TSPEAR;TTBK2;TTC21B;WDR15      |
| green | CC | GO:0043227 | membrane-bounded organelle                  | 17735 | 9590  | 1060 | 608 | 580.45 | 0.03796 | 1.047463 | AASS;ABCB7;ABHD11;ABTB1;ACAA1;ACAD11;ACOXL;ACSS3;ADAM8;ADCK4;ADNP2;ADRA1A;AFAP1L2;AGPA       |
| green | MF | GO:0005487 | nucleocytoplasmic transporter activity      | 17735 | 13    | 1060 | 3   | 0.77   | 0.03831 | 3.896104 | NUP107;NUP160;UPF3B                                                                          |
| green | MF | GO:0010576 | metalloenzyme regulator activity            | 17735 | 13    | 1060 | 3   | 0.77   | 0.03831 | 3.896104 | RECK;SPOCK3;WFIKKN2                                                                          |
| green | MF | GO:0031369 | translation initiation factor binding       | 17735 | 13    | 1060 | 3   | 0.77   | 0.03831 | 3.896104 | EIF4EBP1;EIF4EBP3;TRIM32                                                                     |
| green | MF | GO:0043560 | insulin receptor substrate binding          | 17735 | 13    | 1060 | 3   | 0.77   | 0.03831 | 3.896104 | INSRR;PIK3R1;PTPN11                                                                          |
| green | MF | GO:0003950 | NAD+ ADP-ribosyltransferase activity        | 17735 | 22    | 1060 | 4   | 1.31   | 0.03859 | 3.053435 | ART1;PARP2;SIRT6;TNKS                                                                        |
| green | MF | GO:0022829 | wide pore channel activity                  | 17735 | 22    | 1060 | 4   | 1.31   | 0.03859 | 3.053435 | GIB3;GIC1;GIC2;PANX2                                                                         |
| green | BP | GO:0043067 | regulation of programmed cell death         | 17735 | 1209  | 1060 | 90  | 75.08  | 0.03885 | 1.198721 | ADAM8;AIPL1;AR;ARRB2;ATP2A1;AZU1;BAK1;BARD1;BAX;BCL3;BFAR;CAMK2B;CARD9;CASP7;CD3G;CDK5;C     |
| green | CC | GO:0043231 | intracellular membrane-bounded organelle    | 17735 | 9560  | 1060 | 606 | 578.63 | 0.03906 | 1.047301 | AASS;ABCB7;ABHD11;ABTB1;ACAA1;ACAD11;ACOXL;ACSS3;ADAM8;ADCK4;ADNP2;ADRA1A;AFAP1L2;AGPA       |
| green | BP | GO:0051325 | interphase                                  | 17735 | 414   | 1060 | 35  | 25.71  | 0.03914 | 1.361338 | CAMK2B;CDC23;CDK6;CDKN2D;CENPJ;CEP192;CEP76;CYP1A1;DCTN3;DNAJC2;EIF4EBP1;HAUS2;HMG2A;HSI     |
| green | BP | GO:0045620 | negative regulation of lymphocyte differ... | 17735 | 31    | 1060 | 5   | 1.93   | 0.04045 | 2.590674 | CTLA4;HLX;IHH;NFKBID;ZC3H8                                                                   |
| green | BP | GO:0042981 | regulation of apoptotic process             | 17735 | 1197  | 1060 | 89  | 74.33  | 0.0408  | 1.197363 | ADAM8;AIPL1;AR;ARRB2;ATP2A1;AZU1;BAK1;BARD1;BAX;BCL3;BFAR;CAMK2B;CARD9;CASP7;CD3G;CDK5;C     |
| green | BP | GO:0010941 | regulation of cell death                    | 17735 | 1242  | 1060 | 92  | 77.13  | 0.04109 | 1.192791 | ADAM8;ADNP2;AIPL1;AR;ARRB2;ATP2A1;AZU1;BAK1;BARD1;BAX;BCL3;BFAR;CAMK2B;CARD9;CASP7;CD3G;     |
| green | BP | GO:0006281 | DNA repair                                  | 17735 | 388   | 1060 | 33  | 24.09  | 0.04118 | 1.369863 | ASCC3;ATR;ATXN3;BARD1;C19orf40;CDC14B;CDKN2D;DDX1;ERCC4;ERCC6;FANCC;FANCD2;GADD45G;GTF2I     |
| green | MF | GO:0005496 | steroid binding                             | 17735 | 78    | 1060 | 9   | 4.64   | 0.04141 | 1.939655 | AR;ESRRB;ESRRB;IHH;NPC2;NR1H3;PDIA2;PGRMC2;TSPO                                              |
| green | CC | GO:0044297 | cell body                                   | 17735 | 286   | 1060 | 25  | 17.31  | 0.04151 | 1.444252 | ATP2B2;ATXN10;CABP1;CDK5;CHRNA3;CNTN2;CTNND2;DDN;DNER;EPHA4;FADD;GABARAP;GNB2;GNB3;GR        |
| green | CC | GO:0005923 | tight junction                              | 17735 | 101   | 1060 | 11  | 6.11   | 0.04167 | 1.800327 | AMOT;AMOTL2;CDH5;CLDN10;CLDN11;EPCAM;MTDH;RAB13;RPGRIIP1L;SHROOM2;WNN3                       |
| green | CC | GO:0070160 | occluding junction                          | 17735 | 101   | 1060 | 11  | 6.11   | 0.04167 | 1.800327 | AMOT;AMOTL2;CDH5;CLDN10;CLDN11;EPCAM;MTDH;RAB13;RPGRIIP1L;SHROOM2;WNN3                       |
| green | CC | GO:0005635 | nuclear envelope                            | 17735 | 314   | 1060 | 27  | 19.01  | 0.0419  | 1.420305 | ADRA1A;CDC14B;CERS4;CERS6;CSE1L;DNAJC2;EDNRB;EI24;HPN;IL15RA;IPO7;KIAA1161;LRPPRC;MTDH;MTN   |
| green | BP | GO:0051100 | negative regulation of binding              | 17735 | 75    | 1060 | 9   | 4.66   | 0.04208 | 1.93133  | ARRB2;BAX;CTNBP1;HMG2A;MAPK3;NFIB;PEX19;TNKS;ZF90                                            |
| green | BP | GO:0009987 | cellular process                            | 17735 | 12861 | 1060 | 815 | 798.67 | 0.04214 | 1.020446 | AASDH;AASS;ABCB7;ABCC11;ABHD5;ACAA1;ACAD11;ACOXL;ACVR2B;ADAD2;ADAM8;ADAMTS2;ADNP2;ADI        |
| green | CC | GO:0000790 | nuclear chromatin                           | 17735 | 152   | 1060 | 15  | 9.2    | 0.04226 | 1.630435 | AR;CBX8;HDAC2;MORF4L1;NPM2;NR1H3;NUFIP1;PCGF2;RARA;RBMX;SIRT6;SIRT7;SPI1;TIPIN;UHRF2         |
| green | BP | GO:0051321 | meiotic cell cycle                          | 17735 | 161   | 1060 | 16  | 10     | 0.04231 | 1.6      | CAMK2B;DPEP3;ERCC4;FANCD2;FBXO43;MRE11A;NPM2;NR2C2;PIWIL2;PPP2CA;RAD50;RAD52;RSPH1;SGO1      |
| green | BP | GO:0050804 | regulation of synaptic transmission         | 17735 | 174   | 1060 | 17  | 10.81  | 0.04264 | 1.572618 | ADRA1A;ARRB2;ATP2B2;CAMK2B;CDK5;CHRNA3;CNTN2;CSPG5;CTNND2;DRD3;GPM6B;GRIK3;NRXN1;PRKC        |
| green | CC | GO:0005819 | spindle                                     | 17735 | 232   | 1060 | 21  | 14.04  | 0.04268 | 1.495726 | ARL2BP;ARL8A;CAMK2B;CEP128;CLASP2;CSPP1;DCTN3;DYNC111;HAUS2;KIFAP3;PPP2CA;PSRC1;RGS14;SEPT   |
| green | BP | GO:0006417 | regulation of translation                   | 17735 | 200   | 1060 | 19  | 12.42  | 0.04271 | 1.529791 | APLP1;BCL3;DDX1;EIF1B;EIF2S1;EIF4EBP1;EIF4EBP3;GRB7;NANOS3;NCBP1;NCBP2;PIWIL2;RARA;RGS2;RNF1 |
| green | BP | GO:0007096 | regulation of exit from mitosis             | 17735 | 13    | 1060 | 3   | 0.81   | 0.04275 | 3.703704 | CDC23;NPM2;UBE2C                                                                             |
| green | BP | GO:0007099 | centriole replication                       | 17735 | 13    | 1060 | 3   | 0.81   | 0.04275 | 3.703704 | CENPJ;CEP76;SPICE1                                                                           |
| green | BP | GO:0008347 | glial cell migration                        | 17735 | 13    | 1060 | 3   | 0.81   | 0.04275 | 3.703704 | AZU1;EPHA4;TSPO                                                                              |
| green | BP | GO:0009130 | pyrimidine nucleoside monophosphate bios... | 17735 | 13    | 1060 | 3   | 0.81   | 0.04275 | 3.703704 | UMPS;UPP1;UPRT                                                                               |
| green | BP | GO:0043173 | nucleotide salvage                          | 17735 | 13    | 1060 | 3   | 0.81   | 0.04275 | 3.703704 | AMPD2;NAPRT1;UPP1                                                                            |
| green | BP | GO:0045064 | T-helper 2 cell differentiation             | 17735 | 13    | 1060 | 3   | 0.81   | 0.04275 | 3.703704 | BCL3;HLX;RARA                                                                                |
| green | BP | GO:0045342 | MHC class II biosynthetic process           | 17735 | 13    | 1060 | 3   | 0.81   | 0.04275 | 3.703704 | AZU1;HDAC2;SPI1                                                                              |
| green | BP | GO:0050686 | negative regulation of mRNA processing      | 17735 | 13    | 1060 | 3   | 0.81   | 0.04275 | 3.703704 | BARD1;RBMX;SRSF9                                                                             |
| green | BP | GO:0051044 | positive regulation of membrane protein ... | 17735 | 13    | 1060 | 3   | 0.81   | 0.04275 | 3.703704 | ADAM8;GLP1L;PACSIN3                                                                          |
| green | BP | GO:0060004 | reflex                                      | 17735 | 13    | 1060 | 3   | 0.81   | 0.04275 | 3.703704 | ADRA1A;DRD3;HPN                                                                              |
| green | BP | GO:0086019 | cell-cell signaling involved in cardiac ... | 17735 | 13    | 1060 | 3   | 0.81   | 0.04275 | 3.703704 | ANK2;GJC1;SCN1B                                                                              |
| green | BP | GO:0044092 | negative regulation of molecular functio... | 17735 | 673   | 1060 | 53  | 41.79  | 0.04347 | 1.268246 | AMOT;ARRB2;BAG5;BAX;CABP1;CAND1;CDC23;CDKN2D;CEP192;CTNBP1;DRD3;DUSP1;EDNRB;ELFN1;EPC        |
| green | BP | GO:0008637 | apoptotic mitochondrial changes             | 17735 | 64    | 1060 | 8   | 3.97   | 0.04366 | 2.015113 | ATP2A1;BAK1;BAX;CASP7;DNM1L;PYCARD;SFN;ZNF205                                                |
| green | BP | GO:0045744 | negative regulation of G-protein coupled... | 17735 | 64    | 1060 | 8   | 3.97   | 0.04366 | 2.015113 | ARRB2;CAMK2B;DRD3;RGS11;RGS14;RGS19;RGS2;RPGRIIP1L                                           |
| green | BP | GO:0055085 | transmembrane transport                     | 17735 | 688   | 1060 | 54  | 42.72  | 0.04405 | 1.264045 | ABCC7;ABCC11;ANK2;AQBP;ATP2A1;ATP2B2;ATP6V0A2;ATP6V0B;ATP6V1G2;BAK1;BAX;CACNB2;CASK;CAF5     |
| green | BP | GO:0003254 | regulation of membrane depolarization       | 17735 | 22    | 1060 | 4   | 1.37   | 0.04416 | 2.919708 | BCCL3;GPD1L;SCN1B;TSPO                                                                       |
| green | BP | GO:0031952 | regulation of protein autophosphorylatio... | 17735 | 22    | 1060 | 4   | 1.37   | 0.04416 | 2.919708 | ERRF1;MRE11A;PPP2CA;RAD50                                                                    |
| green | BP | GO:0090200 | positive regulation of release of cytoch... | 17735 | 22    | 1060 | 4   | 1.37   | 0.04416 | 2.919708 | BAK1;BAX;DNM1L;PYCARD                                                                        |
| green | MF | GO:0051059 | NF-kappaB binding                           | 17735 | 23    | 1060 | 4   | 1.37   | 0.04459 | 2.919708 | ANKRD42;MTDH;NFKBID;TAF4B                                                                    |



|       |    |            |                                             |       |      |      |     |        |          |          |                                                                                                |
|-------|----|------------|---------------------------------------------|-------|------|------|-----|--------|----------|----------|------------------------------------------------------------------------------------------------|
| green | MF | GO:0042393 | histone binding                             | 17735 | 104  | 1060 | 11  | 6.19   | 0.04482  | 1.77706  | ASF1B;CBX8;DNAJC2;IPO7;NPM2;RNF168;SET;SPIN1;TDRD3;UHRF2;WDR92                                 |
| green | CC | GO:0032838 | cell projection cytoplasm                   | 17735 | 66   | 1060 | 8   | 3.99   | 0.04498  | 2.005103 | B9D2;DNAH2;DNAH9;DYNC2H1;GRIK3;RPGRIPL1;SPEF1;TTC21B                                           |
| green | BP | GO:0006302 | double-strand break repair                  | 17735 | 112  | 1060 | 12  | 6.96   | 0.04508  | 1.724138 | DDX1;ERCC4;HMGA2;HUS1;MCM8;MORF4L1;MRE11A;OTUB1;RAD50;RAD52;RNF168;SIRT6                       |
| green | BP | GO:0006937 | regulation of muscle contraction            | 17735 | 112  | 1060 | 12  | 6.96   | 0.04508  | 1.724138 | ADRA1A;ANK2;ATP2A1;CHRNA3;GIC1;GPD1L;MYBP3;NCF1;RGS2;SCN1B;SPHK1;SSTR2                         |
| green | BP | GO:0034765 | regulation of ion transmembrane transpor... | 17735 | 112  | 1060 | 12  | 6.96   | 0.04508  | 1.724138 | ANK2;CASK;CNIH2;DRD3;EPO;GPD1L;NRXN1;SCN1B;STIM2;THBS1;WNK2;WNK3                               |
| green | BP | GO:0065004 | protein-DNA complex assembly                | 17735 | 137  | 1060 | 14  | 8.51   | 0.0453   | 1.645123 | ASF1B;AND1;CENPC1;HIST1H1C;HIST1H2AD;HIST1H2BK;HIST1H2BA;RAD52;SET;SHPRH;TAF1B                 |
| green | BP | GO:0032392 | DNA geometric change                        | 17735 | 32   | 1060 | 5   | 1.99   | 0.04558  | 2.512563 | ASCC3;DDX1;MRE11A;RAD50;WRN                                                                    |
| green | CC | GO:0044444 | cytoplasmic part                            | 17735 | 6562 | 1060 | 423 | 397.17 | 0.04673  | 1.065035 | AAGAB;AASS;ABCB7;ABHD11;ABHD5;ACAA1;ACAD11;ACOXL;ACSS3;ACTG2;ADAM8;ADCK4;ADRA1A;AGPAT          |
| green | BP | GO:0000723 | telomere maintenance                        | 17735 | 65   | 1060 | 8   | 4.04   | 0.04719  | 1.980198 | ATP6V0A2;ATP6V1G2;TCIRG1                                                                       |
| green | BP | GO:0043065 | positive regulation of apoptotic process    | 17735 | 421  | 1060 | 35  | 26.14  | 0.04785  | 1.338944 | ADAM8;BAK1;BARD1;BAX;CASP7;CDK5;COL18A1;CTLA4;DUSP1;E124;FADD;GGLD1;HMGA2;IER3;ITGB1;MTC1      |
| green | BP | GO:0032409 | regulation of transporter activity          | 17735 | 101  | 1060 | 11  | 6.27   | 0.04851  | 1.754386 | ANK2;CNIH2;DRD3;EPO;GPD1L;NRXN1;SCN1B;SGK2;STIM2;WNK2;WNK3                                     |
| green | BP | GO:0090068 | positive regulation of cell cycle proces... | 17735 | 164  | 1060 | 16  | 10.18  | 0.04869  | 1.571709 | CAMK2B;CSP1;CYP1A1;DRD3;HMGA2;NPM2;PRKCE;PSMB10;PSMB8;PSMB9;PSMD5;PSME2;SMAD6;TERF1            |
| green | BP | GO:2000112 | regulation of cellular macromolecule bio... | 17735 | 3117 | 1060 | 214 | 193.57 | 0.04873  | 1.105543 | ACVR2B;ADAM8;AFAP1L2;ANKRD42;APLP1;AR;ARMCX3;ARRB2;ASCC3;ASF1B;ATMIN;ATR;ATXN3;BANP;BCL        |
| green | CC | GO:0016471 | vacuolar proton-transporting V-type ATPa... | 17735 | 14   | 1060 | 3   | 0.85   | 0.04876  | 3.529412 | ATP6V0A2;ATP6V1G2;TCIRG1                                                                       |
| green | CC | GO:0031307 | integral to mitochondrial outer membrane    | 17735 | 14   | 1060 | 3   | 0.85   | 0.04876  | 3.529412 | ARMCX3;BAK1;SYNJ2BP                                                                            |
| green | BP | GO:0010556 | regulation of macromolecule biosynthesis... | 17735 | 3197 | 1060 | 219 | 198.53 | 0.04995  | 1.103108 | ACVR2B;ADAM8;AFAP1L2;ANKRD42;APLP1;AR;ARMCX3;ARRB2;ASCC3;ASF1B;ATMIN;ATR;ATXN3;AZU1;BAN        |
| cyan  | BP | GO:0045087 | innate immune response                      | 17735 | 550  | 74   | 21  | 2.35   | 4.00E-15 | 8.93617  | APOL1;C2;GBP1;GBP2;GBPs;ICAM1;IFI16;IFI35;IRF1;IRF9;MB21D1;PARP9;PML;RNASEL;SERPING1;SP100;ST  |
| cyan  | BP | GO:0006952 | defense response                            | 17735 | 1119 | 74   | 24  | 4.77   | 8.30E-12 | 5.031447 | APOL1;APOL2;BATF2;C2;GBP1;GBP2;GBPs;ICAM1;IFI16;IFI35;IRF1;IRF9;MB21D1;PARP9;PML;RNASEL;SERPI  |
| cyan  | BP | GO:0034341 | response to interferon-gamma                | 17735 | 112  | 74   | 10  | 0.48   | 3.80E-11 | 20.83333 | CNIH2;DRD3;EPO;GPD1L;NRXN1;SCN1B;SGK2;STIM2;WNK2;WNK3                                          |
| cyan  | BP | GO:0071346 | cellular response to interferon-gamma       | 17735 | 94   | 74   | 9   | 0.4    | 2.00E-10 | 22.5     | GBP1;GBP2;GBPs;ICAM1;IRF1;IRF9;PML;SP100;STAT1                                                 |
| cyan  | BP | GO:0006955 | immune response                             | 17735 | 1081 | 74   | 22  | 4.61   | 2.30E-10 | 4.772234 | APOL1;C2;GBP1;GBP2;GBPs;ICAM1;IFI16;IFI35;IRF1;IRF9;MB21D1;PARP9;PML;RNASEL;SERPING1;SP100;ST  |
| cyan  | BP | GO:0060337 | type I interferon-mediated signaling pat... | 17735 | 72   | 74   | 8   | 0.31   | 6.60E-10 | 25.80645 | GBP2;IFI35;IRF1;IRF9;RNASEL;SP100;STAT1;STAT2                                                  |
| cyan  | BP | GO:0071357 | cellular response to type I interferon      | 17735 | 72   | 74   | 8   | 0.31   | 6.60E-10 | 25.80645 | GBP2;IFI35;IRF1;IRF9;RNASEL;SP100;STAT1;STAT2                                                  |
| cyan  | BP | GO:0034340 | response to type I interferon               | 17735 | 73   | 74   | 8   | 0.31   | 7.40E-10 | 25.80645 | GBP2;IFI35;IRF1;IRF9;RNASEL;SP100;STAT1;STAT2                                                  |
| cyan  | BP | GO:0060333 | interferon-gamma-mediated signaling path... | 17735 | 75   | 74   | 8   | 0.32   | 9.20E-10 | 25       | GBP1;GBP2;ICAM1;IRF1;IRF9;PML;SP100;STAT1                                                      |
| cyan  | BP | GO:0009615 | response to virus                           | 17735 | 263  | 74   | 12  | 1.12   | 9.20E-10 | 10.71429 | ACTA2;GBP1;IFI16;IFI35;IRF1;IRF9;MB21D1;PML;RNASEL;STAT1;STAT2;TRIM5                           |
| cyan  | BP | GO:0034097 | response to cytokine stimulus               | 17735 | 497  | 74   | 15  | 2.12   | 1.70E-09 | 7.075472 | GBP1;GBP2;GBPs;ICAM1;IFI35;IRF1;IRF9;PARP9;PML;RNASEL;SP100;STAT1;STAT2;TRAFD1;UBE2L6          |
| cyan  | BP | GO:0051607 | defense response to virus                   | 17735 | 185  | 74   | 10  | 0.79   | 5.30E-09 | 12.65823 | GBP1;IFI16;IRF1;IRF9;MB21D1;PML;RNASEL;STAT1;STAT2;TRIM5                                       |
| cyan  | BP | GO:0002367 | immune system process                       | 17735 | 1816 | 74   | 26  | 7.74   | 6.20E-09 | 3.359173 | APOL1;BATF2;BTN2A2;C2;FZD5;GBP1;GBP2;GBPs;ICAM1;IFI16;IFI35;IRF1;IRF9;MB21D1;NRARP;PARP9;PML   |
| cyan  | BP | GO:0002252 | immune effector process                     | 17735 | 471  | 74   | 14  | 2.01   | 8.10E-09 | 6.965174 | C2;GBP1;ICAM1;IFI16;IRF1;IRF9;MB21D1;PML;RNASEL;SERPING1;STAT1;STAT2;TAP1;TRIM5                |
| cyan  | BP | GO:0051704 | response to other organism                  | 17735 | 578  | 74   | 15  | 2.46   | 1.30E-08 | 6.097561 | ACTA2;BATF2;FZD5;GBP1;ICAM1;IFI16;IFI35;IRF1;IRF9;MB21D1;PML;RNASEL;STAT1;STAT2;TRIM5          |
| cyan  | BP | GO:0019221 | cytokine-mediated signaling pathway         | 17735 | 335  | 74   | 12  | 1.43   | 1.40E-08 | 8.391608 | GBP1;GBP2;ICAM1;IFI35;IRF1;IRF9;PML;RNASEL;SP100;STAT1;STAT2;UBE2L6                            |
| cyan  | BP | GO:0071345 | cellular response to cytokine stimulus      | 17735 | 412  | 74   | 13  | 1.76   | 1.50E-08 | 7.386364 | GBP1;GBP2;GBPs;ICAM1;IFI35;IRF1;IRF9;PML;RNASEL;SP100;STAT1;STAT2;UBE2L6                       |
| cyan  | BP | GO:0009607 | response to biotic stimulus                 | 17735 | 606  | 74   | 15  | 2.58   | 2.50E-08 | 5.813953 | ACTA2;BATF2;FZD5;GBP1;ICAM1;IFI16;IFI35;IRF1;IRF9;MB21D1;PML;RNASEL;STAT1;STAT2;TRIM5          |
| cyan  | BP | GO:0045088 | regulation of innate immune response        | 17735 | 225  | 74   | 9   | 0.96   | 4.30E-07 | 9.375    | IFI16;IRF1;MB21D1;PARP9;SERPING1;STAT1;STAT2;TRAFD1;TRIM5                                      |
| cyan  | BP | GO:0051704 | multi-organism process                      | 17735 | 1380 | 74   | 20  | 5.88   | 5.70E-07 | 3.401361 | APOL1;APOL2;BATF2;FZD5;GBP1;ICAM1;IFI16;IFI35;IRF1;IRF9;MB21D1;PML;RNASEL;SP100;SP110;ST       |
| cyan  | BP | GO:0010033 | response to organic substance               | 17735 | 1870 | 74   | 23  | 7.97   | 1.10E-06 | 2.885822 | ATF3;FBXO6;FZD5;GBP1;GBP2;GBPs;HCAR1;ICAM1;IFI35;IRF1;IRF9;MB21D1;PARP9;PML;RNASEL;SORT1;SP    |
| cyan  | BP | GO:0031347 | regulation of defense response              | 17735 | 428  | 74   | 11  | 1.82   | 1.70E-06 | 6.043956 | C2;IFI16;IRF1;MB21D1;PARP9;PML;SERPING1;STAT1;STAT2;TRAFD1;TRIM5                               |
| cyan  | BP | GO:0006950 | response to stress                          | 17735 | 2926 | 74   | 29  | 12.48  | 2.10E-06 | 2.323718 | APOL1;APOL2;ATF3;BATF2;C2;DTX3L;FANCA;FBXO6;FZD5;GBP1;GBP2;GBPs;ICAM1;IFI16;IFI35;IRF1;IRF9;ME |
| cyan  | BP | GO:0002682 | regulation of immune system process         | 17735 | 884  | 74   | 15  | 3.77   | 3.20E-06 | 3.97878  | BTN2A2;C2;ICAM1;IFI16;IRF1;MB21D1;NRARP;PARP9;PML;SERPING1;STAT1;STAT2;TAP1;TRAFD1;TRIM5       |
| cyan  | BP | GO:0050776 | regulation of immune response               | 17735 | 560  | 74   | 12  | 2.39   | 3.50E-06 | 5.020921 | C2;ICAM1;IFI16;IRF1;MB21D1;PARP9;SERPING1;STAT1;STAT2;TAP1;TRAFD1;TRIM5                        |
| cyan  | BP | GO:0045824 | negative regulation of innate immune res... | 17735 | 12   | 74   | 3   | 0.05   | 1.60E-05 | 60       | IFI16;SERPING1;TRAFD1                                                                          |
| cyan  | BP | GO:0071310 | cellular response to organic substance      | 17735 | 1333 | 74   | 17  | 5.68   | 2.80E-05 | 2.992958 | ATF3;GBP1;GBP2;GBPs;ICAM1;IFI35;IRF1;IRF9;MB21D1;PML;RNASEL;SP100;STAT1;STAT2;TGIF1;TRIM5;UBE  |
| cyan  | BP | GO:0080134 | regulation of response to stress            | 17735 | 737  | 74   | 12  | 3.14   | 5.50E-05 | 3.821656 | C2;FZD5;IFI16;IRF1;MB21D1;PARP9;PML;SERPING1;STAT1;STAT2;TRAFD1;TRIM5                          |
| cyan  | BP | GO:0042157 | lipoprotein metabolic process               | 17735 | 98   | 74   | 5   | 0.42   | 6.00E-05 | 11.90476 | APOL1;APOL2;APOL4;APOL6;CETP                                                                   |
| cyan  | BP | GO:0022415 | viral reproductive process                  | 17735 | 542  | 74   | 10  | 2.31   | 8.90E-05 | 4.329004 | ICAM1;IFI16;PML;RNASEL;SP100;SP110;STAT1;STAT2;TAP1;TRIM5                                      |
| cyan  | BP | GO:0002683 | negative regulation of immune system pro... | 17735 | 176  | 74   | 6   | 0.75   | 1.00E-04 | 8        | BTN2A2;IFI16;IRF1;NRARP;SERPING1;TRAFD1                                                        |
| cyan  | BP | GO:0019048 | virus-host interaction                      | 17735 | 371  | 74   | 8   | 1.58   | 0.00017  | 5.063291 | ICAM1;PML;SP100;SP110;STAT1;STAT2;TAP1;TRIM5                                                   |
| cyan  | BP | GO:0043900 | regulation of multi-organism process        | 17735 | 205  | 74   | 6   | 0.87   | 0.00023  | 6.896552 | IFI16;MB21D1;PML;RNASEL;SP100;TRIM5                                                            |
| cyan  | BP | GO:0044703 | multi-organism reproductive process         | 17735 | 730  | 74   | 11  | 3.11   | 0.00023  | 3.536977 | APOL2;ICAM1;IFI16;PML;RNASEL;SP100;SP110;STAT1;STAT2;TAP1;TRIM5                                |
| cyan  | BP | GO:0050896 | response to stimulus                        | 17735 | 6581 | 74   | 42  | 28.06  | 0.00029  | 1.496793 | ACTA2;APOL1;APOL2;ATF3;BATF2;C2;CEACAM1;DTX3L;EMR1;FANCA;FBXO6;FZD5;GBP1;GBP2;GBPs;GPR19       |
| cyan  | BP | GO:0002697 | regulation of immune effector process       | 17735 | 217  | 74   | 6   | 0.93   | 0.00032  | 6.451613 | C2;ICAM1;MB21D1;PML;SERPING1;TAP1                                                              |
| cyan  | BP | GO:0051701 | interaction with host                       | 17735 | 411  | 74   | 8   | 1.75   | 0.00034  | 4.571429 | ICAM1;PML;SP100;SP110;STAT1;STAT2;TAP1;TRIM5                                                   |
| cyan  | BP | GO:0044403 | symbiosis, encompassing mutualism throug... | 17735 | 445  | 74   | 8   | 1.9    | 0.00057  | 4.210526 | ICAM1;PML;SP100;SP110;STAT1;STAT2;TAP1;TRIM5                                                   |
| cyan  | BP | GO:0044419 | interspecies interaction between organis... | 17735 | 445  | 74   | 8   | 1.9    | 0.00057  | 4.210526 | ICAM1;PML;SP100;SP110;STAT1;STAT2;TAP1;TRIM5                                                   |
| cyan  | BP | GO:0070887 | cellular response to chemical stimulus      | 17735 | 1709 | 74   | 17  | 7.29   | 0.00059  | 2.331962 | ATF3;GBP1;GBP2;GBPs;ICAM1;IFI35;IRF1;IRF9;MB21D1;PML;RNASEL;SP100;STAT1;STAT2;TGIF1;TRIM5;UBE  |
| cyan  | BP | GO:0016032 | viral reproduction                          | 17735 | 689  | 74   | 10  | 2.94   | 0.00062  | 3.401361 | ICAM1;IFI16;PML;RNASEL;SP100;SP110;STAT1;STAT2;TAP1;TRIM5                                      |
| cyan  | BP | GO:0044764 | multi-organism cellular process             | 17735 | 691  | 74   | 10  | 2.95   | 0.00063  | 3.389831 | ICAM1;IFI16;PML;RNASEL;SP100;SP110;STAT1;STAT2;TAP1;TRIM5                                      |
| cyan  | BP | GO:0042221 | response to chemical stimulus               | 17735 | 2766 | 74   | 23  | 11.79  | 0.00065  | 1.950806 | ATF3;FBXO6;FZD5;GBP1;GBP2;GBPs;HCAR1;ICAM1;IFI35;IRF1;IRF9;MB21D1;PARP9;PML;RNASEL;SORT1;SP    |
| cyan  | BP | GO:0071219 | cellular response to molecule of bacteri... | 17735 | 98   | 74   | 4   | 0.42   | 8.00E-04 | 9.52381  | FZD5;ICAM1;STAT1;TRIM5                                                                         |
| cyan  | BP | GO:0048384 | retinoic acid receptor signaling pathway    | 17735 | 47   | 74   | 3   | 0.2    | 0.00105  | 15       | PML;SP100;TGIF1                                                                                |
| cyan  | BP | GO:0048584 | positive regulation of response to stimu... | 17735 | 1164 | 74   | 13  | 4.96   | 0.00106  | 2.620968 | C2;FZD5;IFI16;IRF1;MB21D1;NRARP;PML;SEPT4;SERPING1;SHISA5;TAP1;TRIM38;TRIM5                    |
| cyan  | BP | GO:0050778 | positive regulation of immune response      | 17735 | 377  | 74   | 7   | 1.61   | 0.00107  | 4.347826 | C2;IFI16;IRF1;MB21D1;SERPING1;TAP1;TRIM5                                                       |
| cyan  | BP | GO:0071216 | cellular response to biotic stimulus        | 17735 | 108  | 74   | 4   | 0.46   | 0.00115  | 8.695652 | FZD5;ICAM1;STAT1;TRIM5                                                                         |
| cyan  | BP | GO:0007166 | cell surface receptor signaling pathway     | 17735 | 2331 | 74   | 20  | 9.94   | 0.00116  | 2.012072 | CEACAM1;EMR1;FZD5;GBP1;GBP2;GPR19;ICAM1;IFI35;IRF1;IRF9;NRARP;PML;RNASEL;SORT1;SP100;STAT1;    |
| cyan  | CC | GO:0000932 | cytoplasmic mRNA processing body            | 17735 | 51   | 74   | 3   | 0.22   | 0.0014   | 13.63636 | MEX3B;TRIM21;TRIM5                                                                             |
| cyan  | BP | GO:0050777 | negative regulation of immune response      | 17735 | 52   | 74   | 3   | 0.22   | 0.00141  | 13.63636 | IFI16;SERPING1;TRAFD1                                                                          |
| cyan  | BP | GO:0035456 | response to interferon-beta                 | 17735 | 14   | 74   | 2   | 0.06   | 0.00157  | 33.33333 | IRF1;STAT1                                                                                     |
| cyan  | BP | GO:0042310 | vasoconstriction                            | 17735 | 54   | 74   | 3   | 0.23   | 0.00157  | 13.04348 | ACTA2;ICAM1;SMTNL1                                                                             |

|      |    |            |                                             |       |      |    |    |       |         |          |                                                                                               |
|------|----|------------|---------------------------------------------|-------|------|----|----|-------|---------|----------|-----------------------------------------------------------------------------------------------|
| cyan | BP | GO:0008285 | negative regulation of cell proliferatio... | 17735 | 522  | 74 | 8  | 2.23  | 0.00161 | 3.587444 | BTN2A2;FZD5;GAS8;IRF1;PML;STAT1;TGIF1;WARS                                                    |
| cyan | BP | GO:0006869 | lipid transport                             | 17735 | 207  | 74 | 5  | 0.88  | 0.00187 | 5.681818 | APOL1;APOL2;APOL4;APOL6;CETP                                                                  |
| cyan | BP | GO:0002253 | activation of immune response               | 17735 | 310  | 74 | 6  | 1.32  | 0.00202 | 4.545455 | C2;IFI16;IRF1;MB21D1;SERPING1;TRIM5                                                           |
| cyan | BP | GO:0002250 | adaptive immune response                    | 17735 | 211  | 74 | 5  | 0.9   | 0.00203 | 5.555556 | C2;ICAM1;IRF1;SERPING1;TAP1                                                                   |
| cyan | BP | GO:0002230 | positive regulation of defense response ... | 17735 | 16   | 74 | 2  | 0.07  | 0.00207 | 28.57143 | MB21D1;PML                                                                                    |
| cyan | BP | GO:0002684 | positive regulation of immune system pro... | 17735 | 554  | 74 | 8  | 2.36  | 0.00233 | 3.389831 | C2;ICAM1;IFI16;IRF1;MB21D1;SERPING1;TAP1;TRIM5                                                |
| cyan | BP | GO:0045907 | positive regulation of vasoconstriction     | 17735 | 18   | 74 | 2  | 0.08  | 0.00262 | 25       | ICAM1;SMTNL1                                                                                  |
| cyan | BP | GO:0002218 | activation of innate immune response        | 17735 | 140  | 74 | 4  | 0.6   | 0.00298 | 6.666667 | IFI16;IRF1;MB21D1;TRIM5                                                                       |
| cyan | BP | GO:0001906 | cell killing                                | 17735 | 68   | 74 | 3  | 0.29  | 0.00304 | 10.34483 | APOL1;ICAM1;TAP1                                                                              |
| cyan | BP | GO:0048583 | regulation of response to stimulus          | 17735 | 2347 | 74 | 19 | 10.01 | 0.0032  | 1.898102 | C2;FZD5;ICAM1;IFI16;IRF1;MB21D1;NRARP;PARP9;PML;SEPT4;SERPING1;SHISA5;STAT1;STAT2;TAP1;TGIF1; |
| cyan | BP | GO:0030449 | regulation of complement activation         | 17735 | 20   | 74 | 2  | 0.09  | 0.00323 | 22.22222 | C2;SERPING1                                                                                   |
| cyan | BP | GO:2000257 | regulation of protein activation cascade    | 17735 | 20   | 74 | 2  | 0.09  | 0.00323 | 22.22222 | C2;SERPING1                                                                                   |
| cyan | BP | GO:0050868 | negative regulation of T cell activation    | 17735 | 70   | 74 | 3  | 0.3   | 0.0033  | 10       | BTN2A2;IRF1;NRARP                                                                             |
| cyan | BP | GO:0010876 | lipid localization                          | 17735 | 237  | 74 | 5  | 1.01  | 0.00335 | 4.950495 | APOL1;APOL2;APOL4;APOL6;CETP                                                                  |
| cyan | MF | GO:0003924 | GTPase activity                             | 17735 | 232  | 74 | 5  | 1.01  | 0.0034  | 4.950495 | GBP1;GBP2;GBP4;GBPs;SEPT4                                                                     |
| cyan | BP | GO:0032606 | type I interferon production                | 17735 | 71   | 74 | 3  | 0.3   | 0.00343 | 10       | IRF1;IRF9;UBE2L6                                                                              |
| cyan | BP | GO:0043330 | response to exogenous dsRNA                 | 17735 | 21   | 74 | 2  | 0.09  | 0.00357 | 22.22222 | MB21D1;STAT1                                                                                  |
| cyan | BP | GO:0022414 | reproductive process                        | 17735 | 1510 | 74 | 14 | 6.44  | 0.00389 | 2.173913 | APOL2;FANCA;FZD5;ICAM1;IFI16;PML;RNASEL;SEPT4;SP100;SP110;STAT1;STAT2;TAP1;TRIM5              |
| cyan | BP | GO:0045581 | negative regulation of T cell differenti... | 17735 | 22   | 74 | 2  | 0.09  | 0.00391 | 22.22222 | IRF1;NRARP                                                                                    |
| cyan | MF | GO:0003950 | NAD+ ADP-ribosyltransferase activity        | 17735 | 22   | 74 | 2  | 0.1   | 0.0041  | 20       | PARP14;PARP9                                                                                  |
| cyan | BP | GO:0050691 | regulation of defense response to virus ... | 17735 | 23   | 74 | 2  | 0.1   | 0.00427 | 20       | MB21D1;PML                                                                                    |
| cyan | BP | GO:0001525 | angiogenesis                                | 17735 | 362  | 74 | 6  | 1.54  | 0.00434 | 3.896104 | CEACAM1;FZD5;NRARP;PML;STAT1;WARS                                                             |
| cyan | BP | GO:0051716 | cellular response to stimulus               | 17735 | 5052 | 74 | 32 | 21.54 | 0.00459 | 1.485608 | ATF3;CEACAM1;DTX3L;EMR1;FANCA;FBXO6;FZD5;GBP1;GBP2;GBPs;GPR19;ICAM1;IFI16;IFI35;IRF1;IRF9;ME  |
| cyan | MF | GO:0004842 | ubiquitin-protein ligase activity           | 17735 | 253  | 74 | 5  | 1.1   | 0.0049  | 4.545455 | DTX3L;FBXO6;TRIM21;TRIM5;UBE2L6                                                               |
| cyan | BP | GO:2000242 | negative regulation of reproductive proc... | 17735 | 81   | 74 | 3  | 0.35  | 0.00497 | 8.571429 | IFI16;RNASEL;SP100                                                                            |
| cyan | BP | GO:0042771 | intrinsic apoptotic signaling pathway in... | 17735 | 25   | 74 | 2  | 0.11  | 0.00504 | 18.18182 | IFI16;PML                                                                                     |
| cyan | BP | GO:0060330 | regulation of response to interferon-gam... | 17735 | 25   | 74 | 2  | 0.11  | 0.00504 | 18.18182 | PARP9;STAT1                                                                                   |
| cyan | CC | GO:0034364 | high-density lipoprotein particle           | 17735 | 25   | 74 | 2  | 0.11  | 0.0051  | 18.18182 | APOL1;CETP                                                                                    |
| cyan | BP | GO:0001568 | blood vessel development                    | 17735 | 498  | 74 | 7  | 2.12  | 0.00512 | 3.301887 | ACTA2;CEACAM1;FZD5;NRARP;PML;STAT1;WARS                                                       |
| cyan | BP | GO:0031348 | negative regulation of defense response     | 17735 | 82   | 74 | 3  | 0.35  | 0.00515 | 8.571429 | IFI16;SERPING1;TRAFD1                                                                         |
| cyan | MF | GO:0005525 | GTP binding                                 | 17735 | 366  | 74 | 6  | 1.6   | 0.0052  | 3.75     | GBP1;GBP2;GBP4;GBPs;RAB20;SEPT4                                                               |
| cyan | CC | GO:0019005 | SCF ubiquitin ligase complex                | 17735 | 26   | 74 | 2  | 0.11  | 0.0055  | 18.18182 | FBXO6;TRIM21                                                                                  |
| cyan | BP | GO:0002831 | regulation of response to biotic stimulu... | 17735 | 84   | 74 | 3  | 0.36  | 0.0055  | 8.333333 | MB21D1;PML;TRIM5                                                                              |
| cyan | BP | GO:0045089 | positive regulation of innate immune res... | 17735 | 167  | 74 | 4  | 0.71  | 0.00558 | 5.633803 | IFI16;IRF1;MB21D1;TRIM5                                                                       |
| cyan | MF | GO:0019001 | guanyl nucleotide binding                   | 17735 | 380  | 74 | 6  | 1.66  | 0.0062  | 3.614458 | GBP1;GBP2;GBP4;GBPs;RAB20;SEPT4                                                               |
| cyan | MF | GO:0032561 | guanyl ribonucleotide binding               | 17735 | 380  | 74 | 6  | 1.66  | 0.0062  | 3.614458 | GBP1;GBP2;GBP4;GBPs;RAB20;SEPT4                                                               |
| cyan | BP | GO:0000003 | reproduction                                | 17735 | 1591 | 74 | 14 | 6.78  | 0.0062  | 2.064897 | APOL2;FANCA;FZD5;ICAM1;IFI16;PML;RNASEL;SEPT4;SP100;SP110;STAT1;STAT2;TAP1;TRIM5              |
| cyan | CC | GO:0035770 | ribonucleoprotein granule                   | 17735 | 88   | 74 | 3  | 0.38  | 0.0064  | 7.894737 | MEX3B;TRIM21;TRIM5                                                                            |
| cyan | MF | GO:0019787 | small conjugating protein ligase activit... | 17735 | 269  | 74 | 5  | 1.17  | 0.0064  | 4.273504 | DTX3L;FBXO6;TRIM21;TRIM5;UBE2L6                                                               |
| cyan | BP | GO:0001944 | vasculature development                     | 17735 | 523  | 74 | 7  | 2.23  | 0.00665 | 3.139013 | ACTA2;CEACAM1;FZD5;NRARP;PML;STAT1;WARS                                                       |
| cyan | BP | GO:0060759 | regulation of response to cytokine stimu... | 17735 | 90   | 74 | 3  | 0.38  | 0.00666 | 7.894737 | PARP9;STAT1;STAT2                                                                             |
| cyan | BP | GO:0002449 | lymphocyte mediated immunity                | 17735 | 179  | 74 | 4  | 0.76  | 0.00711 | 5.263158 | C2;ICAM1;SERPING1;TAP1                                                                        |
| cyan | BP | GO:0070206 | protein trimerization                       | 17735 | 30   | 74 | 2  | 0.13  | 0.00721 | 15.38462 | TRIM21;TRIM5                                                                                  |
| cyan | BP | GO:0071222 | cellular response to lipopolysaccharide     | 17735 | 93   | 74 | 3  | 0.4   | 0.00729 | 7.5      | ICAM1;STAT1;TRIM5                                                                             |
| cyan | BP | GO:0045620 | negative regulation of lymphocyte differ... | 17735 | 31   | 74 | 2  | 0.13  | 0.00768 | 15.38462 | IRF1;NRARP                                                                                    |
| cyan | BP | GO:0051250 | negative regulation of lymphocyte activa... | 17735 | 96   | 74 | 3  | 0.41  | 0.00796 | 7.317073 | BTN2A2;IRF1;NRARP                                                                             |
| cyan | BP | GO:0045071 | negative regulation of viral genome repl... | 17735 | 32   | 74 | 2  | 0.14  | 0.00817 | 14.28571 | IFI16;RNASEL                                                                                  |
| cyan | BP | GO:0072332 | intrinsic apoptotic signaling pathway by... | 17735 | 32   | 74 | 2  | 0.14  | 0.00817 | 14.28571 | IFI16;PML                                                                                     |
| cyan | BP | GO:0007165 | signal transduction                         | 17735 | 4165 | 74 | 27 | 17.76 | 0.00854 | 1.52027  | ATF3;CEACAM1;EMR1;FZD5;GBP1;GBP2;GPR19;ICAM1;IFI16;IFI35;IRF1;IRF9;NRARP;PML;RAB20;RNASEL;SE  |
| cyan | BP | GO:0001910 | regulation of leukocyte mediated cytotox... | 17735 | 33   | 74 | 2  | 0.14  | 0.00868 | 14.28571 | ICAM1;TAP1                                                                                    |
| cyan | BP | GO:0002920 | regulation of humoral immune response       | 17735 | 33   | 74 | 2  | 0.14  | 0.00868 | 14.28571 | C2;SERPING1                                                                                   |
| cyan | BP | GO:0048525 | negative regulation of viral reproductio... | 17735 | 33   | 74 | 2  | 0.14  | 0.00868 | 14.28571 | IFI16;RNASEL                                                                                  |
| cyan | BP | GO:0060338 | regulation of type I interferon-mediated... | 17735 | 33   | 74 | 2  | 0.14  | 0.00868 | 14.28571 | STAT1;STAT2                                                                                   |
| cyan | BP | GO:0048519 | negative regulation of biological proces... | 17735 | 3150 | 74 | 22 | 13.43 | 0.00869 | 1.638124 | ATF3;BTN2A2;CETP;FBXO6;FZD5;GAS8;ICAM1;IFI16;IRF1;NRARP;PML;RNASEL;SERPING1;SMTNL1;SORT1;SP   |
| cyan | BP | GO:0010212 | response to ionizing radiation              | 17735 | 101  | 74 | 3  | 0.43  | 0.00915 | 6.976744 | ICAM1;IFI16;PML                                                                               |
| cyan | BP | GO:0002460 | adaptive immune response based on somati... | 17735 | 193  | 74 | 4  | 0.82  | 0.00922 | 4.878049 | C2;ICAM1;SERPING1;TAP1                                                                        |
| cyan | BP | GO:0043122 | regulation of I-kappaB kinase/NF-kappaB ... | 17735 | 194  | 74 | 4  | 0.83  | 0.00938 | 4.819277 | SHISA5;STAT1;TRIM38;TRIM5                                                                     |
| cyan | BP | GO:0006917 | induction of apoptosis                      | 17735 | 195  | 74 | 4  | 0.83  | 0.00955 | 4.819277 | IRF1;PML;SHISA5;STAT1                                                                         |
| cyan | MF | GO:0000978 | RNA polymerase II core promoter proximal... | 17735 | 34   | 74 | 2  | 0.15  | 0.0096  | 13.33333 | IRF1;STAT1                                                                                    |
| cyan | BP | GO:0012502 | induction of programmed cell death          | 17735 | 196  | 74 | 4  | 0.84  | 0.00972 | 4.761905 | IRF1;PML;SHISA5;STAT1                                                                         |
| cyan | MF | GO:0016881 | acid-amino acid ligase activity             | 17735 | 299  | 74 | 5  | 1.31  | 0.0098  | 3.816794 | DTX3L;FBXO6;TRIM21;TRIM5;UBE2L6                                                               |
| cyan | CC | GO:0005737 | cytoplasm                                   | 17735 | 9016 | 74 | 49 | 38.75 | 0.0098  | 1.264516 | ACOT9;ACPE;ACTA2;APOL2;APOL6;ASPHD2;C7orf49;DTX3L;ERP27;FANCA;FBXO6;FITSJ2;FZD5;GAS8;GBP1;(   |
| cyan | BP | GO:0001816 | cytokine production                         | 17735 | 430  | 74 | 6  | 1.83  | 0.00983 | 3.278689 | BTN2A2;FZD5;IFI16;IRF1;IRF9;UBE2L6                                                            |
| cyan | BP | GO:0042127 | regulation of cell proliferation            | 17735 | 1174 | 74 | 11 | 5.01  | 0.01009 | 2.195609 | ATF3;BTN2A2;FANCA;FZD5;GAS8;IRF1;NRARP;PML;STAT1;TGIF1;WARS                                   |
| cyan | BP | GO:0065007 | biological regulation                       | 17735 | 8616 | 74 | 46 | 36.74 | 0.01019 | 1.252041 | ACTA2;APOL1;ATF3;BTN2A2;C2;CARD6;CEACAM1;CETP;EMR1;FANCA;FBXO6;FZD5;GAS8;GBP1;GBP2;GPR15      |
| cyan | BP | GO:0031341 | regulation of cell killing                  | 17735 | 36   | 74 | 2  | 0.15  | 0.01027 | 13.33333 | ICAM1;TAP1                                                                                    |
| cyan | BP | GO:0031663 | lipopolysaccharide-mediated signaling pa... | 17735 | 36   | 74 | 2  | 0.15  | 0.01027 | 13.33333 | STAT1;TRIM5                                                                                   |
| cyan | BP | GO:2001235 | positive regulation of apoptotic signali... | 17735 | 36   | 74 | 2  | 0.15  | 0.01027 | 13.33333 | PML;SEPT4                                                                                     |
| cyan | CC | GO:0034358 | plasma lipoprotein particle                 | 17735 | 36   | 74 | 2  | 0.15  | 0.0104  | 13.33333 | APOL1;CETP                                                                                    |

|      |    |            |                                             |       |      |    |    |       |         |          |                                                                                             |
|------|----|------------|---------------------------------------------|-------|------|----|----|-------|---------|----------|---------------------------------------------------------------------------------------------|
| cyan | BP | GO:0048514 | blood vessel morphogenesis                  | 17735 | 438  | 74 | 6  | 1.87  | 0.0107  | 3.208556 | CEACAM1;FZD5;NRARP;PML;STAT1;WARS                                                           |
| cyan | BP | GO:0097190 | apoptotic signaling pathway                 | 17735 | 202  | 74 | 4  | 0.86  | 0.01077 | 4.651163 | IFI16;PML;SEPT4;SORT1                                                                       |
| cyan | BP | GO:1900117 | regulation of execution phase of apoptos... | 17735 | 202  | 74 | 4  | 0.86  | 0.01077 | 4.651163 | IFI16;PML;SEPT4;SORT1                                                                       |
| cyan | BP | GO:0006513 | protein monoubiquitination                  | 17735 | 37   | 74 | 2  | 0.16  | 0.01082 | 12.5     | DTX3L;TRIM21                                                                                |
| cyan | BP | GO:0043392 | negative regulation of DNA binding          | 17735 | 37   | 74 | 2  | 0.16  | 0.01082 | 12.5     | IFI16;SP100                                                                                 |
| cyan | BP | GO:0050789 | regulation of biological process            | 17735 | 8134 | 74 | 44 | 34.68 | 0.01084 | 1.268743 | ATF3;BTN2A2;C2;CARD6;CEACAM1;CETP;EMR1;FANCA;FBXO6;FZD5;GAS8;GBP1;GBP2;GPR19;ICAM1;IFI16;I  |
| cyan | CC | GO:0032994 | protein-lipid complex                       | 17735 | 37   | 74 | 2  | 0.16  | 0.011   | 12.5     | APOL1;CETP                                                                                  |
| cyan | BP | GO:0002526 | acute inflammatory response                 | 17735 | 109  | 74 | 3  | 0.46  | 0.01125 | 6.521739 | APOL2;C2;SERPING1                                                                           |
| cyan | BP | GO:0050792 | regulation of viral reproduction            | 17735 | 109  | 74 | 3  | 0.46  | 0.01125 | 6.521739 | IFI16;RNA5EL;SP100                                                                          |
| cyan | BP | GO:0043331 | response to dsRNA                           | 17735 | 38   | 74 | 2  | 0.16  | 0.01139 | 12.5     | MB21D1;STAT1                                                                                |
| cyan | BP | GO:0002695 | negative regulation of leukocyte activat... | 17735 | 110  | 74 | 3  | 0.47  | 0.01153 | 6.382979 | BTN2A2;IRF1;NRARP                                                                           |
| cyan | BP | GO:0050880 | regulation of blood vessel size             | 17735 | 110  | 74 | 3  | 0.47  | 0.01153 | 6.382979 | ACTA2;ICAM1;SMTNL1                                                                          |
| cyan | BP | GO:0035150 | regulation of tube size                     | 17735 | 111  | 74 | 3  | 0.47  | 0.01181 | 6.382979 | ACTA2;ICAM1;SMTNL1                                                                          |
| cyan | BP | GO:0002237 | response to molecule of bacterial origin    | 17735 | 211  | 74 | 4  | 0.9   | 0.01248 | 4.444444 | FZD5;ICAM1;STAT1;TRIM5                                                                      |
| cyan | BP | GO:0008203 | cholesterol metabolic process               | 17735 | 115  | 74 | 3  | 0.49  | 0.01299 | 6.122449 | APOL1;APOL2;CETP                                                                            |
| cyan | BP | GO:0002521 | leukocyte differentiation                   | 17735 | 329  | 74 | 5  | 1.4   | 0.01299 | 3.571429 | BATF2;FZD5;IFI16;IRF1;NRARP                                                                 |
| cyan | BP | GO:0061005 | cell differentiation involved in kidney ... | 17735 | 41   | 74 | 2  | 0.17  | 0.01318 | 11.76471 | ACTA2;STAT1                                                                                 |
| cyan | BP | GO:0097193 | intrinsic apoptotic signaling pathway       | 17735 | 116  | 74 | 3  | 0.49  | 0.0133  | 6.122449 | IFI16;PML;SEPT4                                                                             |
| cyan | BP | GO:0007249 | I-kappaB kinase/NF-kappaB cascade           | 17735 | 217  | 74 | 4  | 0.93  | 0.01371 | 4.301075 | SHISA5;STAT1;TRIM38;TRIM5                                                                   |
| cyan | BP | GO:0019229 | regulation of vasoconstriction              | 17735 | 42   | 74 | 2  | 0.18  | 0.0138  | 11.11111 | ICAM1;SMTNL1                                                                                |
| cyan | BP | GO:0070613 | regulation of protein processing            | 17735 | 42   | 74 | 2  | 0.18  | 0.0138  | 11.11111 | C2;SERPING1                                                                                 |
| cyan | BP | GO:0050866 | negative regulation of cell activation      | 17735 | 119  | 74 | 3  | 0.51  | 0.01424 | 5.882353 | BTN2A2;IRF1;NRARP                                                                           |
| cyan | MF | GO:0016879 | ligase activity, forming carbon-nitrogen... | 17735 | 330  | 74 | 5  | 1.44  | 0.0145  | 3.472222 | DTX3L;FBXO6;TRIM21;TRIM5;UBE2L6                                                             |
| cyan | BP | GO:0002443 | leukocyte mediated immunity                 | 17735 | 221  | 74 | 4  | 0.94  | 0.01457 | 4.255319 | C2;ICAM1;SERPING1;TAP1                                                                      |
| cyan | BP | GO:0042110 | T cell activation                           | 17735 | 339  | 74 | 5  | 1.45  | 0.01463 | 3.448276 | BTN2A2;FZD5;ICAM1;IRF1;NRARP                                                                |
| cyan | BP | GO:0016125 | sterol metabolic process                    | 17735 | 121  | 74 | 3  | 0.52  | 0.01488 | 5.769231 | APOL1;APOL2;CETP                                                                            |
| cyan | BP | GO:0008630 | intrinsic apoptotic signaling pathway in... | 17735 | 45   | 74 | 2  | 0.19  | 0.01574 | 10.52632 | IFI16;PML                                                                                   |
| cyan | MF | GO:0016763 | transferase activity, transferring pento... | 17735 | 44   | 74 | 2  | 0.19  | 0.0158  | 10.52632 | PARP14;PARP9                                                                                |
| cyan | BP | GO:0031349 | positive regulation of defense response     | 17735 | 229  | 74 | 4  | 0.98  | 0.0164  | 4.081633 | IFI16;IRF1;MB21D1;TRIM5                                                                     |
| cyan | BP | GO:0008015 | blood circulation                           | 17735 | 349  | 74 | 5  | 1.49  | 0.0164  | 3.355705 | ACTA2;ICAM1;SERPING1;SMTNL1;STAT1                                                           |
| cyan | MF | GO:0000987 | core promoter proximal region sequence-s... | 17735 | 45   | 74 | 2  | 0.2   | 0.0165  | 10       | IRF1;STAT1                                                                                  |
| cyan | BP | GO:0003013 | circulatory system process                  | 17735 | 350  | 74 | 5  | 1.49  | 0.01658 | 3.355705 | ACTA2;ICAM1;SERPING1;SMTNL1;STAT1                                                           |
| cyan | MF | GO:0001159 | core promoter proximal region DNA bindin... | 17735 | 46   | 74 | 2  | 0.2   | 0.0172  | 10       | IRF1;STAT1                                                                                  |
| cyan | BP | GO:0043170 | macromolecule metabolic process             | 17735 | 7334 | 74 | 40 | 31.27 | 0.01761 | 1.279181 | APOL1;APOL2;APOL4;APOL6;ASPHD2;ATF3;BATF2;C2;CETP;DTX3L;ETV7;FANCA;FBXO6;FJSD2;FZD5;ICAM1;  |
| cyan | BP | GO:0003018 | vascular process in circulatory system      | 17735 | 129  | 74 | 3  | 0.55  | 0.01764 | 5.454545 | ACTA2;ICAM1;SMTNL1                                                                          |
| cyan | BP | GO:0002456 | T cell mediated immunity                    | 17735 | 48   | 74 | 2  | 0.2   | 0.01779 | 10       | ICAM1;TAP1                                                                                  |
| cyan | BP | GO:0045069 | regulation of viral genome replication      | 17735 | 48   | 74 | 2  | 0.2   | 0.01779 | 10       | IFI16;RNA5EL                                                                                |
| cyan | BP | GO:0072331 | signal transduction by p53 class mediato... | 17735 | 130  | 74 | 3  | 0.55  | 0.018   | 5.454545 | IFI16;PML;SP100                                                                             |
| cyan | BP | GO:0001909 | leukocyte mediated cytotoxicity             | 17735 | 49   | 74 | 2  | 0.21  | 0.0185  | 9.52381  | ICAM1;TAP1                                                                                  |
| cyan | MF | GO:0016874 | ligase activity                             | 17735 | 483  | 74 | 6  | 2.11  | 0.0186  | 2.843602 | DTX3L;FBXO6;TRIM21;TRIM5;UBE2L6;WARS                                                        |
| cyan | BP | GO:0006958 | complement activation, classical pathway    | 17735 | 51   | 74 | 2  | 0.22  | 0.0195  | 9.090909 | C2;SERPING1                                                                                 |
| cyan | BP | GO:0030097 | hemopoiesis                                 | 17735 | 509  | 74 | 6  | 2.17  | 0.02099 | 2.764977 | BATF2;FZD5;IFI16;IRF1;NRARP;PML                                                             |
| cyan | BP | GO:0002673 | regulation of acute inflammatory respons... | 17735 | 53   | 74 | 2  | 0.23  | 0.02144 | 8.695652 | C2;SERPING1                                                                                 |
| cyan | BP | GO:0043901 | negative regulation of multi-organism pr... | 17735 | 54   | 74 | 2  | 0.23  | 0.02221 | 8.695652 | IFI16;RNA5EL                                                                                |
| cyan | MF | GO:0004871 | signal transducer activity                  | 17735 | 1632 | 74 | 13 | 7.13  | 0.0227  | 1.823282 | EMR1;FZD5;GPR19;HCAR1;ICAM1;OR52K2;SHISA5;SORT1;SP110;STAT1;STAT2;TRIM38;TRIM               |
| cyan | MF | GO:0060089 | molecular transducer activity               | 17735 | 1632 | 74 | 13 | 7.13  | 0.0227  | 1.823282 | EMR1;FZD5;GPR19;HCAR1;ICAM1;OR52K2;SHISA5;SORT1;SP110;STAT1;STAT2;TRIM38;TRIM               |
| cyan | BP | GO:0016525 | negative regulation of angiogenesis         | 17735 | 55   | 74 | 2  | 0.23  | 0.02298 | 8.695652 | PML;STAT1                                                                                   |
| cyan | BP | GO:0045892 | negative regulation of transcription, DN... | 17735 | 823  | 74 | 8  | 3.51  | 0.02298 | 2.279202 | ATF3;IFI16;IRF1;NRARP;PML;SP100;STAT1;TGIF1                                                 |
| cyan | BP | GO:0043123 | positive regulation of I-kappaB kinase/N... | 17735 | 143  | 74 | 3  | 0.61  | 0.0231  | 4.918033 | SHISA5;TRIM38;TRIM5                                                                         |
| cyan | BP | GO:0001817 | regulation of cytokine production           | 17735 | 382  | 74 | 5  | 1.63  | 0.02322 | 3.067485 | BTN2A2;FZD5;IFI16;IRF1;UBE2L6                                                               |
| cyan | BP | GO:0097194 | execution phase of apoptosis                | 17735 | 260  | 74 | 4  | 1.11  | 0.02481 | 3.603604 | IFI16;PML;SEPT4;SORT1                                                                       |
| cyan | BP | GO:0019538 | protein metabolic process                   | 17735 | 3895 | 74 | 24 | 16.61 | 0.02681 | 1.444913 | APOL1;APOL2;APOL4;APOL6;ASPHD2;ATF3;C2;CETP;DTX3L;FBXO6;FZD5;IRF1;IRF9;LAP3;MEX3B;PML;RNA5E |
| cyan | BP | GO:0048534 | hematopoietic or lymphoid organ developm... | 17735 | 542  | 74 | 6  | 2.31  | 0.02752 | 2.597403 | BATF2;FZD5;IFI16;IRF1;NRARP;PML                                                             |
| cyan | BP | GO:0051253 | negative regulation of RNA metabolic pro... | 17735 | 852  | 74 | 8  | 3.63  | 0.02756 | 2.203857 | ATF3;IFI16;IRF1;NRARP;PML;SP100;STAT1;TGIF1                                                 |
| cyan | BP | GO:0019079 | viral genome replication                    | 17735 | 61   | 74 | 2  | 0.26  | 0.02786 | 7.692308 | IFI16;RNA5EL                                                                                |
| cyan | BP | GO:0008283 | cell proliferation                          | 17735 | 1542 | 74 | 12 | 6.57  | 0.02791 | 1.826484 | ATF3;BTN2A2;FANCA;FZD5;GAS8;IFI16;IRF1;NRARP;PML;STAT1;TGIF1;WARS                           |
| cyan | BP | GO:0045765 | regulation of angiogenesis                  | 17735 | 157  | 74 | 3  | 0.67  | 0.02937 | 4.477612 | PML;STAT1;WARS                                                                              |
| cyan | BP | GO:0045321 | leukocyte activation                        | 17735 | 552  | 74 | 6  | 2.35  | 0.02975 | 2.553191 | BATF2;BTN2A2;FZD5;ICAM1;IRF1;NRARP                                                          |
| cyan | BP | GO:0030217 | T cell differentiation                      | 17735 | 160  | 74 | 3  | 0.68  | 0.03083 | 4.411765 | FZD5;IRF1;NRARP                                                                             |
| cyan | MF | GO:0046332 | SMAD binding                                | 17735 | 63   | 74 | 2  | 0.28  | 0.0309  | 7.142857 | PML;TGIF1                                                                                   |
| cyan | BP | GO:0050688 | regulation of defense response to virus     | 17735 | 65   | 74 | 2  | 0.28  | 0.03133 | 7.142857 | MB21D1;PML                                                                                  |
| cyan | BP | GO:0002455 | humoral immune response mediated by circ... | 17735 | 66   | 74 | 2  | 0.28  | 0.03222 | 7.142857 | C2;SERPING1                                                                                 |
| cyan | BP | GO:0006956 | complement activation                       | 17735 | 66   | 74 | 2  | 0.28  | 0.03222 | 7.142857 | C2;SERPING1                                                                                 |
| cyan | BP | GO:0032479 | regulation of type I interferon producti... | 17735 | 67   | 74 | 2  | 0.29  | 0.03312 | 6.896552 | IRF1;UBE2L6                                                                                 |
| cyan | BP | GO:0051101 | regulation of DNA binding                   | 17735 | 67   | 74 | 2  | 0.29  | 0.03312 | 6.896552 | IFI16;SP100                                                                                 |
| cyan | BP | GO:0043065 | positive regulation of apoptotic process    | 17735 | 421  | 74 | 5  | 1.8   | 0.03341 | 2.777778 | IRF1;PML;SEPT4;SHISA5;STAT1                                                                 |
| cyan | BP | GO:0002520 | immune system development                   | 17735 | 572  | 74 | 6  | 2.44  | 0.03454 | 2.459016 | BATF2;FZD5;IFI16;IRF1;NRARP;PML                                                             |
| cyan | BP | GO:0043068 | positive regulation of programmed cell d... | 17735 | 426  | 74 | 5  | 1.82  | 0.03489 | 2.747253 | IRF1;PML;SEPT4;SHISA5;STAT1                                                                 |
| cyan | BP | GO:0007569 | cell aging                                  | 17735 | 70   | 74 | 2  | 0.3   | 0.03589 | 6.666667 | ICAM1;PML                                                                                   |

|       |    |             |                                              |       |       |      |      |         |          |          |                                                                                                   |
|-------|----|-------------|----------------------------------------------|-------|-------|------|------|---------|----------|----------|---------------------------------------------------------------------------------------------------|
| cyan  | BP | GO:1901342  | regulation of vasculature development        | 17735 | 170   | 74   | 3    | 0.72    | 0.03593  | 4.166667 | PML;STAT1;WARS                                                                                    |
| cyan  | BP | GO:0071356  | cellular response to tumor necrosis fact...  | 17735 | 71    | 74   | 2    | 0.3     | 0.03683  | 6.666667 | ICAM1;STAT1                                                                                       |
| cyan  | BP | GO:0001936  | regulation of endothelial cell prolifera...  | 17735 | 72    | 74   | 2    | 0.31    | 0.03778  | 6.451613 | NRARP;STAT1                                                                                       |
| cyan  | BP | GO:00023052 | signaling                                    | 17735 | 4666  | 74   | 27   | 19.89   | 0.03818  | 1.357466 | ATF3;CEACAM1;EMR1;FZD5;GBP1;GBP2;GPR19;ICAM1;IFI16;IFI35;IRF1;IRF9;NRARP;PML;RAB20;RNASEL;SE      |
| cyan  | BP | GO:0044700  | single organism signaling                    | 17735 | 4666  | 74   | 27   | 19.89   | 0.03818  | 1.357466 | ATF3;CEACAM1;EMR1;FZD5;GBP1;GBP2;GPR19;ICAM1;IFI16;IFI35;IRF1;IRF9;NRARP;PML;RAB20;RNASEL;SE      |
| cyan  | BP | GO:0010629  | negative regulation of gene expression       | 17735 | 909   | 74   | 8    | 3.88    | 0.03837  | 2.061856 | ATF3;IFI16;IRF1;NRARP;PML;SP100;STAT1;TGIF1                                                       |
| cyan  | BP | GO:0051239  | regulation of multicellular organismal p...  | 17735 | 1804  | 74   | 13   | 7.69    | 0.03853  | 1.690507 | BTN2A2;FZD5;ICAM1;IFI16;IRF1;NRARP;PML;SERPING1;SMTNL1;STAT1;TGIF1;UBE2L6;WARS                    |
| cyan  | CC | GO:0016605  | PML body                                     | 17735 | 73    | 74   | 2    | 0.31    | 0.0394   | 6.451613 | PML;SP100                                                                                         |
| cyan  | CC | GO:0044444  | cytoplasmic part                             | 17735 | 6562  | 74   | 36   | 28.2    | 0.0399   | 1.276596 | ACOT9;ACP6;ACTA2;APOL2;ASPHD2;ERP27;FZD5;GAS8;GBP1;GBP2;GBP5;IFI35;IRF1;IRF9;LACTB;LAP3;MB21      |
| cyan  | BP | GO:0006366  | transcription from RNA polymerase II pro...  | 17735 | 1444  | 74   | 11   | 6.16    | 0.04016  | 1.785714 | ETV7;FZD5;IFI16;IRF1;IRF9;NRARP;RNASEL;SP100;STAT1;STAT2;TGIF1                                    |
| cyan  | MF | GO:0003677  | DNA binding                                  | 17735 | 2332  | 74   | 16   | 10.18   | 0.0404   | 1.571709 | ATF3;BATF2;ETV7;IFI16;IRF1;IRF9;MB21D1;PML;RMI2;SP100;SP110;STAT1;STAT2;TGIF1;TRIM21;ZNF88        |
| cyan  | BP | GO:0010942  | positive regulation of cell death            | 17735 | 444   | 74   | 5    | 1.89    | 0.04055  | 2.645503 | IRF1;PML;SEPT4;SHISA5;STAT1                                                                       |
| cyan  | CC | GO:0005829  | cytosol                                      | 17735 | 2362  | 74   | 16   | 10.15   | 0.0406   | 1.576355 | ACTA2;GBP1;GBP2;IFI35;IRF1;IRF9;MB21D1;PARP9;PML;PSTPIP2;RNASEL;STAT1;STAT2;TAP1;UBE2L6;WARS      |
| cyan  | BP | GO:0051100  | negative regulation of binding               | 17735 | 75    | 74   | 2    | 0.32    | 0.04068  | 6.25     | IFI16;SP100                                                                                       |
| cyan  | BP | GO:0006351  | transcription, DNA-dependent                 | 17735 | 3208  | 74   | 20   | 13.68   | 0.04118  | 1.461988 | ATF3;BATF2;ETV7;FZD5;ICAM1;IFI16;IRF1;IRF9;NRARP;PARP14;PML;RNASEL;SP100;SP110;STAT1;STAT2;TGI    |
| cyan  | BP | GO:0000113  | negative regulation of cellular macromol...  | 17735 | 923   | 74   | 8    | 3.94    | 0.04142  | 2.030457 | ATF3;IFI16;IRF1;NRARP;PML;SP100;STAT1;TGIF1                                                       |
| cyan  | MF | GO:0005319  | lipid transporter activity                   | 17735 | 74    | 74   | 2    | 0.32    | 0.0415   | 6.25     | APOL6;CETP                                                                                        |
| cyan  | BP | GO:0001775  | cell activation                              | 17735 | 758   | 74   | 7    | 3.23    | 0.04165  | 2.167183 | BATF2;BTN2A2;FZD5;ICAM1;IRF1;NRARP;SERPING1                                                       |
| cyan  | BP | GO:0006895  | Golgi to endosome transport                  | 17735 | 10    | 74   | 1    | 0.04    | 0.04184  | 25       | SORT1                                                                                             |
| cyan  | BP | GO:0031664  | regulation of lipopolysaccharide-mediate...  | 17735 | 10    | 74   | 1    | 0.04    | 0.04184  | 25       | TRIM5                                                                                             |
| cyan  | BP | GO:0036037  | CD8-positive, alpha-beta T cell activati...  | 17735 | 10    | 74   | 1    | 0.04    | 0.04184  | 25       | IRF1                                                                                              |
| cyan  | BP | GO:0072109  | glomerular mesangium development             | 17735 | 10    | 74   | 1    | 0.04    | 0.04184  | 25       | ACTA2                                                                                             |
| cyan  | BP | GO:0072203  | cell proliferation involved in metanephro... | 17735 | 10    | 74   | 1    | 0.04    | 0.04184  | 25       | STAT1                                                                                             |
| cyan  | BP | GO:0009892  | negative regulation of metabolic process     | 17735 | 1456  | 74   | 11   | 6.21    | 0.04227  | 1.771337 | ATF3;BTN2A2;IFI16;IRF1;NRARP;PML;SERPING1;SP100;STAT1;TGIF1;TRIM21                                |
| cyan  | BP | GO:0051091  | positive regulation of sequence-specific...  | 17735 | 182   | 74   | 3    | 0.78    | 0.0426   | 3.846154 | ICAM1;SP100;TRIM5                                                                                 |
| cyan  | BP | GO:0045934  | negative regulation of nucleobase-contai...  | 17735 | 932   | 74   | 8    | 3.97    | 0.04346  | 2.015113 | ATF3;IFI16;IRF1;NRARP;PML;SP100;STAT1;TGIF1                                                       |
| cyan  | BP | GO:2001233  | regulation of apoptotic signaling pathwa...  | 17735 | 78    | 74   | 2    | 0.33    | 0.04367  | 6.060606 | PML;SEPT4                                                                                         |
| cyan  | BP | GO:0072358  | cardiovascular system development            | 17735 | 768   | 74   | 7    | 3.27    | 0.04419  | 2.140673 | ACTA2;CEACAM1;FZD5;NRARP;PML;STAT1;WARS                                                           |
| cyan  | BP | GO:0072359  | circulatory system development               | 17735 | 768   | 74   | 7    | 3.27    | 0.04419  | 2.140673 | ACTA2;CEACAM1;FZD5;NRARP;PML;STAT1;WARS                                                           |
| cyan  | BP | GO:0006974  | response to DNA damage stimulus              | 17735 | 608   | 74   | 6    | 2.59    | 0.04438  | 2.316602 | DTX3L;FANCA;FBXO6;IFI16;PML;SP100                                                                 |
| cyan  | BP | GO:0045580  | regulation of T cell differentiation         | 17735 | 79    | 74   | 2    | 0.34    | 0.04469  | 5.882353 | IRF1;NRARP                                                                                        |
| cyan  | BP | GO:0006516  | glycoprotein catabolic process               | 17735 | 11    | 74   | 1    | 0.05    | 0.04593  | 20       | FBXO6                                                                                             |
| cyan  | BP | GO:0034370  | triglyceride-rich lipoprotein particle r...  | 17735 | 11    | 74   | 1    | 0.05    | 0.04593  | 20       | CETP                                                                                              |
| cyan  | BP | GO:0034372  | very-low-density lipoprotein particle re...  | 17735 | 11    | 74   | 1    | 0.05    | 0.04593  | 20       | CETP                                                                                              |
| cyan  | BP | GO:0034374  | low-density lipoprotein particle remodel...  | 17735 | 11    | 74   | 1    | 0.05    | 0.04593  | 20       | CETP                                                                                              |
| cyan  | BP | GO:0045351  | type I interferon biosynthetic process       | 17735 | 11    | 74   | 1    | 0.05    | 0.04593  | 20       | IRF9                                                                                              |
| cyan  | BP | GO:0051972  | regulation of telomerase activity            | 17735 | 11    | 74   | 1    | 0.05    | 0.04593  | 20       | PML                                                                                               |
| cyan  | BP | GO:0060192  | negative regulation of lipase activity       | 17735 | 11    | 74   | 1    | 0.05    | 0.04593  | 20       | SORT1                                                                                             |
| cyan  | MF | GO:0032183  | SUMO binding                                 | 17735 | 11    | 74   | 1    | 0.05    | 0.047    | 20       | PML                                                                                               |
| brown | CC | GO:0044424  | intracellular part                           | 17735 | 12103 | 1802 | 1408 | 1232.48 | 1.10E-25 | 1.142412 | AATF;AATK;ABAT;ABCG1;ACIN1;ACO1;ACOX1;ACP1;ACRC;ACSM1;ACSM3;ACSS2;ACTA1;ACTB;ACTG1;ACTN1;         |
| brown | CC | GO:0005622  | intracellular                                | 17735 | 12344 | 1802 | 1424 | 1257.02 | 3.30E-24 | 1.132838 | AATF;AATK;ABAT;ABCG1;ACIN1;ACO1;ACOX1;ACP1;ACRC;ACSM1;ACSM3;ACSS2;ACTA1;ACTB;ACTG1;ACTN1;         |
| brown | CC | GO:0005737  | cytoplasm                                    | 17735 | 9016  | 1802 | 1112 | 918.12  | 7.60E-24 | 1.211171 | AATF;AATK;ABAT;ABCG1;ACIN1;ACO1;ACOX1;ACP1;ACRC;ACSM1;ACSM3;ACSS2;ACTA1;ACTB;ACTG1;ACTN1;ACFY     |
| brown | CC | GO:0043227  | membrane-bounded organelle                   | 17735 | 9590  | 1802 | 1159 | 976.57  | 8.80E-22 | 1.186807 | AATF;AATK;ABAT;ABCG1;ACIN1;ACO1;ACOX1;ACP1;ACRC;ACSM1;ACSM3;ACSS2;ACTA1;ACTB;ACTG1;ACTN1;         |
| brown | CC | GO:0043231  | intracellular membrane-bounded organelle     | 17735 | 9560  | 1802 | 1151 | 973.52  | 1.10E-20 | 1.182308 | AATF;AATK;ABAT;ABCG1;ACIN1;ACO1;ACOX1;ACP1;ACRC;ACSM1;ACSM3;ACSS2;ACTA1;ACTB;ACTG1;ACTN1;         |
| brown | CC | GO:0043226  | organelle                                    | 17735 | 10552 | 1802 | 1238 | 1074.54 | 7.40E-19 | 1.152121 | AATF;AATK;ABAT;ABCG1;ACIN1;ACO1;ACOX1;ACP1;ACRC;ACSM1;ACSM3;ACSS2;ACTA1;ACTB;ACTG1;ACTN1;         |
| brown | CC | GO:0043229  | intracellular organelle                      | 17735 | 10522 | 1802 | 1234 | 1071.48 | 1.30E-18 | 1.151678 | AATF;AATK;ABAT;ABCG1;ACIN1;ACO1;ACOX1;ACP1;ACRC;ACSM1;ACSM3;ACSS2;ACTA1;ACTB;ACTG1;ACTN1;         |
| brown | CC | GO:0044444  | cytoplasmic part                             | 17735 | 6562  | 1802 | 835  | 668.22  | 3.40E-18 | 1.249588 | AATF;AATK;ABAT;ABCG1;ACIN1;ACO1;ACOX1;ACSM1;ACSM3;ACSS2;ACTA1;ACTB;ACTG1;ACTN1;ACYP2;AD           |
| brown | MF | GO:0005515  | protein binding                              | 17735 | 7306  | 1802 | 895  | 757.91  | 1.50E-13 | 1.180879 | AATF;AATK;ABAT;ABCG1;ACIN1;ACO1;ACOX1;ACP1;ACTA1;ACTB;ACTG1;ACTN1;ACVR1B;ADAM19;ADAMTS            |
| brown | CC | GO:0044446  | intracellular organelle part                 | 17735 | 6219  | 1802 | 752  | 633.3   | 3.00E-10 | 1.187431 | AATF;AATK;ABAT;ABCG1;ACIN1;ACO1;ACOX1;ACSM1;ACSM3;ACTA1;ACTB;ACTG1;ACTN1;ADAP2;ADAR;AFF2;AGPAT1;A |
| brown | CC | GO:0044422  | organelle part                               | 17735 | 6321  | 1802 | 761  | 643.68  | 5.20E-10 | 1.182264 | AATF;AATK;ABAT;ABCG1;ACIN1;ACO1;ACOX1;ACSM1;ACSM3;ACTA1;ACTB;ACTG1;ACTN1;ADAP2;ADAR;AFF2;AGPAT1;A |
| brown | CC | GO:0044464  | cell part                                    | 17735 | 14451 | 1802 | 1550 | 1471.58 | 6.90E-10 | 1.05329  | AATF;AATK;ABAT;ABCC5;ABCC6;ABCG1;ACIN1;ACO1;ACOX1;ACP1;ACRC;ACSM1;ACSM3;ACSS2;ACTA1;ACTE          |
| brown | CC | GO:0005623  | cell                                         | 17735 | 14452 | 1802 | 1550 | 1471.68 | 7.20E-10 | 1.053218 | AATF;AATK;ABAT;ABCC5;ABCC6;ABCG1;ACIN1;ACO1;ACOX1;ACP1;ACRC;ACSM1;ACSM3;ACSS2;ACTA1;ACTE          |
| brown | BP | GO:0016192  | vesicle-mediated transport                   | 17735 | 894   | 1802 | 154  | 95.97   | 9.50E-10 | 1.604668 | ACTN1;ADRBK2;AH1;ALB;ANXA11;AP1M1;AP2A1;AP2M1;AP3B1;APOA1;APP;ARAP3;ARCN1;ARF1;ARF3;ARL           |
| brown | MF | GO:0005488  | binding                                      | 17735 | 11799 | 1802 | 1314 | 1224    | 1.40E-09 | 1.073529 | AATF;AATK;ANXA11;AP1M1;AP2M1;ARSD;ARSG;ASAHI;CD1D;CD68;CTSA;CTSB;CTSD;CTS2;CXCR2;GALNS;GBA;GLE    |
| brown | CC | GO:0005829  | cytosol                                      | 17735 | 2362  | 1802 | 324  | 240.53  | 2.10E-09 | 1.347025 | ACIN1;ACO1;ACSS2;ACTA1;ACTB;ACTG1;ACTN1;ADAL;ADK;ADSL;AGBL2;AKAP13;ALDH1A1;ALDH9A1;ALDOC          |
| brown | BP | GO:0007264  | small GTPase mediated signal transductio...  | 17735 | 619   | 1802 | 111  | 66.45   | 2.80E-08 | 1.670429 | ADAP2;AKAP13;ALDH1A1;APOA1;ARAP1;ARAP3;ARF1;ARF3;ARFGAP3;ARHGAP24;ARHGAP2                         |
| brown | BP | GO:0006897  | endocytosis                                  | 17735 | 362   | 1802 | 74   | 38.86   | 3.00E-08 | 1.904272 | ADRBK2;AH1;ANXA11;AP2A1;AP3B1;APP;ARF6;ARHGAP27;ATXN2;BIN2;C3;CAMK1D;CAP1;CBL;CD14;CD20           |
| brown | BP | GO:0002376  | immune system process                        | 17735 | 1816  | 1802 | 264  | 194.95  | 4.40E-08 | 1.354193 | ACIN1;ACVR1B;ADAR;ADK;AMICA1;AP1M1;AP2A1;AP2M1;AP3B1;APOA1;APOBEC3C;APP;ARF1;ARHGAP3;ARHGAP24     |
| brown | CC | GO:0005773  | vacuole                                      | 17735 | 402   | 1802 | 76   | 40.94   | 7.00E-08 | 1.856375 | AGA;ANXA11;AP1M1;AP2M1;ARSD;ARSG;ASAHI;CD1D;CD68;CTSA;CTSB;CTSD;CTS2;CXCR2;GALNS;GBA;GLE          |
| brown | CC | GO:0031982  | vesicle                                      | 17735 | 993   | 1802 | 152  | 101.12  | 1.30E-07 | 1.503165 | ACTA1;ACTB;ACTG1;ACTN1;ALB;ANXA11;ANXA5;ANXA7;AP1M1;AP2A1;AP2M1;AP3B1;APOA1;APP;ARCN1;AR          |
| brown | CC | GO:0005739  | mitochondrion                                | 17735 | 1488  | 1802 | 212  | 151.53  | 1.30E-07 | 1.399063 | ACIN1;ACO1;ACOX1;ACSM1;ACSM3;ACYP2;ADAP2;ADHS;ADO;ADSL;ALAI1;ALDH2;ALDH9A1;AI                     |
| brown | CC | GO:0031090  | organelle membrane                           | 17735 | 2366  | 1802 | 314  | 240.94  | 1.30E-07 | 1.303229 | ABCG1;ACOX1;AGPAT1;ALG14;ALGS;ANKFY1;ANXA7;AP1M1;AP2A1;AP2M1;AP3B1;APC2;ARAP1;ARCN1;AR            |
| brown | CC | GO:0000323  | lytic vacuole                                | 17735 | 337   | 1802 | 65   | 34.32   | 2.90E-07 | 1.893939 | AGA;ANXA11;AP1M1;AP2M1;ARSD;ARSG;ASAHI;CD1D;CD68;CTSA;CTSB;CTSD;CTS2;CXCR2;GALNS;GBA;GLE          |
| brown | CC | GO:0005764  | lysosome                                     | 17735 | 337   | 1802 | 65   | 34.32   | 2.90E-07 | 1.893939 | AGA;ANXA11;AP1M1;AP2M1;ARSD;ARSG;ASAHI;CD1D;CD68;CTSA;CTSB;CTSD;CTS2;CXCR2;GALNS;GBA;GLE          |
| brown | BP | GO:0030097  | hemopoiesis                                  | 17735 | 509   | 1802 | 92   | 54.64   | 3.10E-07 | 1.683748 | ACIN1;ACVR1B;AP3B1;ARNT;ASH2L;ATPIF1;BCL6;BTK;CBFA2T3;CCL3;CD1D;CD3D;CD86;CDC42;CITED2;CNN        |
| brown | MF | GO:0019899  | enzyme binding                               | 17735 | 1084  | 1802 | 163  | 112.45  | 4.30E-07 | 1.449533 | ABAT;ACIN1;ACTB;ACVR1B;ADAMTSL4;ALB;ANAPC4;ANKRA2;AP3B1;APOA1;ARF6;ATF7;ATP6V0A1;ATP6V0           |
| brown | BP | GO:0046907  | intracellular transport                      | 17735 | 1214  | 1802 | 184  | 130.32  | 4.30E-07 | 1.411909 | ABCG1;ADAR;AKR1C3;ANP32A;AP1M1;AP2A1;AP2M1;AP3B1;APC2;APP;ARCN1;ARF1;ARFGAP3;ARHGAP21             |
| brown | CC | GO:0005634  | nucleus                                      | 17735 | 5873  | 1802 | 691  | 598.06  | 4.70E-07 | 1.155402 | AATF;ACIN1;ACP1;ACRC;ACSS2;ACTB;ACTN1;ADAR;ADHS;ADK;AFF2;AKAP13;AKR1C3;ALAI1;ALKBH2;ALKBH         |
| brown | BP | GO:0009611  | response to wounding                         | 17735 | 1090  | 1802 | 168  | 117.01  | 4.90E-07 | 1.435775 | ABHD2;ACTB;ACTG1;ACTN1;ALB;AMICA1;ANXA5;AOAH;AP3B1;APBB1P;APOA1;APP;ATP2B4;BAGL1;BCL6             |

|       |    |            |                                             |       |      |      |     |        |          |          |                                                                                              |
|-------|----|------------|---------------------------------------------|-------|------|------|-----|--------|----------|----------|----------------------------------------------------------------------------------------------|
| brown | CC | GO:0030139 | endocytic vesicle                           | 17735 | 163  | 1802 | 38  | 16.6   | 8.00E-07 | 2.289157 | ANXA11;AP2A1;AP2M1;APOA1;ATP6V0A1;ATP6V0C;ATP6V0D1;CACNG8;CAMK2G;CLTA;CLTC;EHD1;EHD3;F       |
| brown | BP | GO:0006950 | response to stress                          | 17735 | 2926 | 1802 | 388 | 314.11 | 8.10E-07 | 1.235236 | AATF;ABAT;ABHD2;ACTB;ACTG1;ACTN1;ADAR;ADHS;ADSL;AKR1C3;ALB;ALDH3B1;ALDOC;ALKBK2;ALKBH3;A     |
| brown | BP | GO:0048534 | hematopoietic or lymphoid organ developm... | 17735 | 542  | 1802 | 95  | 58.18  | 8.30E-07 | 1.632864 | ACIN1;ACVR1B;AP3B1;ARNT;ASH2L;ATPIF1;BCL6;BTk;CBFA2T3;CCL3;CD1D;CD3D;CD86;CDC42;CITED2;CNN;  |
| brown | BP | GO:0008517 | coagulation                                 | 17735 | 501  | 1802 | 89  | 53.78  | 1.00E-06 | 1.65489  | ACTB;ACTG1;ACTN1;ALB;AMICA1;ANXAS;AP3B1;APBB1P;APB1;APP;ATP2B4;BLOC1S3;BRPF3;BSSG;C4BPB;     |
| brown | BP | GO:0007599 | hemostasis                                  | 17735 | 502  | 1802 | 89  | 53.89  | 1.10E-06 | 1.651512 | ACTB;ACTG1;ACTN1;ALB;AMICA1;ANXAS;ANXA7;AP3B1;APBB1P;APOA1;APP;ATP2B4;BLOC1S3;BRPF3;BSSG;    |
| brown | BP | GO:0001777 | cell activation                             | 17735 | 758  | 1802 | 123 | 81.37  | 1.40E-06 | 1.511614 | ACTN1;ALB;AP3B1;APBB1P;APOA1;APP;BCL6;BLOC1S3;BRPF3;BTk;BTN3A1;CAP1;CCL3;CD1D;CD1D;CD        |
| brown | BP | GO:0007596 | blood coagulation                           | 17735 | 498  | 1802 | 88  | 53.46  | 1.50E-06 | 1.646091 | ACTB;ACTG1;ACTN1;ALB;AMICA1;ANXAS;AP3B1;APBB1P;APOA1;APP;ATP2B4;BLOC1S3;BRPF3;BSSG;C4BPB;    |
| brown | BP | GO:0015031 | protein transport                           | 17735 | 1245 | 1802 | 185 | 133.65 | 1.50E-06 | 1.384212 | ABCG1;ADAR;AKR1C3;AP1M1;AP2A1;AP2M1;AP3B1;APC2;APOA1;ARCN1;ARF1;ARF3;ARF6;ARFGAP3;ARL6;      |
| brown | BP | GO:0002520 | immune system development                   | 17735 | 572  | 1802 | 98  | 61.41  | 1.60E-06 | 1.595831 | ACIN1;ACVR1B;AP3B1;ARNT;ASH2L;ATPIF1;BCL6;BTk;CBFA2T3;CCL3;CD1D;CD3D;CD86;CDC42;CITED2;CNN;  |
| brown | CC | GO:0031988 | membrane-bounded vesicle                    | 17735 | 905  | 1802 | 136 | 92.16  | 1.70E-06 | 1.475694 | ACTA1;ACTB;ACTG1;ACTN1;ALB;ANXA11;ANXAS;ANXA7;AP1M1;AP2A1;AP2M1;AP3B1;APOA1;APP;ARCN1;A      |
| brown | BP | GO:0002682 | regulation of immune system process         | 17735 | 884  | 1802 | 139 | 94.9   | 1.70E-06 | 1.4647   | ACIN1;ACVR1B;ADK;AMICA1;AP1M1;AP2A1;AP2M1;AP3B1;APOA1;ARF1;ARNT;BCL6;BLOC1S3;BTk;BTN3A1;     |
| brown | BP | GO:0051649 | establishment of localization in cell       | 17735 | 1820 | 1802 | 255 | 195.38 | 1.80E-06 | 1.305149 | ABAT;ABCG1;ACTN1;ADAR;AKR1C3;ALB;ANP32A;AP1M1;AP2A1;AP2M1;AP3B1;APC2;APOA1;APP;ARCN1;A       |
| brown | BP | GO:0033036 | macromolecule localization                  | 17735 | 1852 | 1802 | 258 | 198.82 | 2.50E-06 | 1.297656 | ABCG1;ADAR;AHI1;AKR1C3;AP1M1;AP2A1;AP2M1;AP3B1;APC2;APOA1;APOBR;ARCN1;ARF1;ARF3;ARF6;AR      |
| brown | MF | GO:0008047 | enzyme activator activity                   | 17735 | 404  | 1802 | 72  | 41.91  | 3.00E-06 | 1.717967 | ADAP2;ALDH1A1;APOA1;APP;ARAP1;ARAP3;ARFGAP3;ARHGAP1;ARHGAP21;ARHGAP23;ARHGAP24;ARHGAP25;ARHG |
| brown | BP | GO:0030099 | myeloid cell differentiation                | 17735 | 247  | 1802 | 51  | 26.52  | 3.10E-06 | 1.923077 | ACIN1;ACVR1B;ARNT;ATPIF1;BCL6;CBFA2T3;CCL3;CDC42;CITED2;CSF1;CSF1R;CTNNB1;DAB2;G6PD;GAB2;G   |
| brown | CC | GO:0031252 | cell leading edge                           | 17735 | 260  | 1802 | 51  | 26.48  | 3.30E-06 | 1.925982 | ACIN1;APBB1P;APC2;ARAP3;ARF6;ARHGAP1;ARHGAP31;BRCA1;CAPZB;CFL1;CTNNA1;CTNNA2;CTNND1;CTNND    |
| brown | BP | GO:0007265 | Ras protein signal transduction             | 17735 | 378  | 1802 | 70  | 40.58  | 3.30E-06 | 1.724988 | ADAP2;AKAP13;ALDH1A1;APOA1;ARAP1;ARAP3;ARF6;ARFGAP3;ARHGAP1;ARHGAP26;ARHGAP27;ARHGDB         |
| brown | CC | GO:0031974 | membrane-enclosed lumen                     | 17735 | 2770 | 1802 | 349 | 282.08 | 4.10E-06 | 1.237238 | AATF;ABAT;ACIN1;ACOX1;ACSM1;ACSM3;ACTB;ACTN1;ADAR;AFF2;ALAS1;ALB;ALDH2;ALKBH2;ALKBH3;A       |
| brown | CC | GO:0031410 | cytoplasmic vesicle                         | 17735 | 914  | 1802 | 135 | 93.07  | 4.70E-06 | 1.450521 | ACTN1;ALB;ANXA11;ANXA7;AP1M1;AP2A1;AP2M1;AP3B1;APOA1;APP;ARCN1;ARHGAP21;ARHGAP30;ARH         |
| brown | MF | GO:0008013 | beta-catenin binding                        | 17735 | 60   | 1802 | 19  | 6.22   | 5.70E-06 | 3.054662 | APC2;BCL9;CALCOCO1;CARD11;CBL;CDH1;CHOD8;CSNK2A1;CTNNA1;DVL3;EP300;ESR1;MED12;NUMB;PSEN      |
| brown | BP | GO:0003168 | platelet activation                         | 17735 | 219  | 1802 | 46  | 23.51  | 5.80E-06 | 1.956614 | ACTN1;ALB;APBB1P;APOA1;APP;BLOC1S3;BRPF3;CAP1;CFL1;DGKG;F13A1;F2RL2;GNA11;GNA12;GNA15;GN     |
| brown | BP | GO:0006909 | phagocytosis                                | 17735 | 96   | 1802 | 26  | 10.31  | 6.00E-06 | 2.521823 | ANXA11;BIN2;C3;CAMK1D;CD14;CD93;CDC42SE1;CNN2;COLEC12;CORO1C;DOCK2;ELMO1;ELMO2;FCN1;H        |
| brown | BP | GO:0008219 | cell death                                  | 17735 | 1741 | 1802 | 242 | 186.9  | 6.30E-06 | 1.29481  | AATF;AATK;ACIN1;ACTN1;ACVR1B;ADAMTSL4;ADAR;AHI1;AKAP13;AKR1C3;ALB;ALDOC;ALOX15B;AMIGO2;A     |
| brown | BP | GO:0016265 | death                                       | 17735 | 1743 | 1802 | 242 | 187.11 | 6.90E-06 | 1.293357 | AATF;AATK;ACIN1;ACTN1;ACVR1B;ADAMTSL4;ADAR;AHI1;AKAP13;AKR1C3;ALB;ALDOC;ALOX15B;AMIGO2;A     |
| brown | CC | GO:0043233 | organelle lumen                             | 17735 | 2722 | 1802 | 342 | 277.19 | 6.90E-06 | 1.233811 | AATF;ABAT;ACIN1;ACOX1;ACSM1;ACSM3;ACTB;ACTN1;ADAR;AFF2;ALAS1;ALB;ALDH2;ALKBH2;ALKBH3;A       |
| brown | BP | GO:0006007 | glucose catabolic process                   | 17735 | 705  | 1802 | 22  | 8.05   | 7.70E-06 | 2.732919 | ALDOC;ARNT;DHTKD1;ENO1;FBP1;G6PD;GAPDH5;GCK;GLYR1;HDC4;HIBADH;HK1;HK2;INSR;NOR1;PFKFB        |
| brown | BP | GO:0051641 | cellular localization                       | 17735 | 2049 | 1802 | 278 | 219.96 | 8.20E-06 | 1.263866 | ABAT;ABCG1;ACTN1;ADAR;AHI1;AKR1C3;ALB;ANP32A;AP1M1;AP2A1;AP2M1;AP3B1;APC2;APOA1;APP;AR       |
| brown | BP | GO:0048583 | regulation of response to stimulus          | 17735 | 2347 | 1802 | 313 | 251.95 | 8.50E-06 | 1.24231  | ACVR1B;ADAP2;ADRBK2;AGPAT1;AHI1;AKAP13;AKR1C3;ALB;ALDH1A1;AMICA1;AOAH;AP1M1;AP2A1;AP2M       |
| brown | BP | GO:0042060 | wound healing                               | 17735 | 610  | 1802 | 100 | 65.48  | 9.00E-06 | 1.527184 | ACTB;ACTG1;ACTN1;ALB;AMICA1;ANXAS;AP3B1;AP3B1;APBB1P;APOA1;APP;ATP2B4;B4G1T1;BCL9;LOC153;B   |
| brown | BP | GO:0045184 | establishment of protein localization       | 17735 | 1288 | 1802 | 186 | 138.27 | 9.00E-06 | 1.345194 | ABCG1;ADAR;AKR1C3;AP1M1;AP2A1;AP2M1;AP3B1;APC2;APOA1;ARCN1;ARF1;ARF3;ARF6;ARFGAP3;ARL6;      |
| brown | CC | GO:0003163 | intracellular organelle lumen               | 17735 | 2677 | 1802 | 336 | 272.61 | 9.30E-06 | 1.232514 | ACTN1;ABAT;ACIN1;ACOX1;ACSM1;ACSM3;ACTB;ADAR;AFF2;ALAS1;ALB;ALDH2;ALKBH2;ALKBH3;ANP32        |
| brown | BP | GO:0009267 | cellular response to starvation             | 17735 | 87   | 1802 | 24  | 9.34   | 9.70E-06 | 2.569593 | AKR1C3;ALB;ATG7;BECN1;CTSD;DAP;FBXO22;GCK;HFE;HSPA5;KIAA1324;LZTS1;MAX;NBR1;NUAK2;PRKCD;P    |
| brown | MF | GO:0050839 | cell adhesion molecule binding              | 17735 | 53   | 1802 | 17  | 5.5    | 1.40E-05 | 3.090909 | AMICA1;CD1D;CDH1;CTNNA1;CTNNA11;CTNNB1;CTNND1;LILRB2;MSN;NDRG1;NUMB;PSEN1;PVR;PVRL1;SE       |
| brown | BP | GO:0050878 | regulation of body fluid levels             | 17735 | 594  | 1802 | 97  | 63.77  | 1.40E-05 | 1.521091 | ACTB;ACTG1;ACTN1;ALB;AMICA1;ANXAS;ANXA7;AP3B1;APBB1P;APOA1;APP;ATP2B4;BLOC1S3;BRPF3;BSSG;    |
| brown | BP | GO:0010468 | regulation of gene expression               | 17735 | 3347 | 1802 | 426 | 359.31 | 1.70E-05 | 1.185606 | AATF;ABCG1;ACOX1;ACVR1B;ADAR;ADK;AFF2;AHI1;ALKBH2;ALKBH3;ANP32A;APOA1;APOBEC3C;APP;ARHG      |
| brown | CC | GO:0030555 | cell-substrate junction                     | 17735 | 138  | 1802 | 31  | 14.05  | 1.80E-05 | 2.06406  | AATF;ACIN1;AFAP1;APBB1P;ARHGAP24;ARHGAP26;ARHGAP31;BRCA1;CASS4;CDH1;CTNNA1;DAG1;HCK;IR       |
| brown | BP | GO:0050794 | regulation of cellular process              | 17735 | 7700 | 1802 | 904 | 826.61 | 1.80E-05 | 1.093623 | AATF;ABCG1;ABHD2;ACIN1;ACOX1;ACTN1;ACVR1B;ADAMTSL4;ADAP2;ADAR;ADCY4;ADK;ADRBK2;AFF2;AGP      |
| brown | BP | GO:0050789 | regulation of biological process            | 17735 | 8134 | 1802 | 950 | 873.2  | 1.80E-05 | 1.087952 | AATF;ABCG1;ABHD2;ACIN1;ACOX1;ACTN1;ACVR1B;ADAMTSL4;ADAP2;ADAR;ADCY4;ADK;ADRBK2;AF            |
| brown | CC | GO:0005924 | cell-substrate adherens junction            | 17735 | 132  | 1802 | 30  | 13.44  | 1.90E-05 | 2.232143 | AATF;ACTN1;AFAP1;APBB1P;ARHGAP24;ARHGAP26;ARHGAP31;BRCA1;CASS4;CDH1;CTNNB1;DAG1;HCK;IR       |
| brown | BP | GO:0008104 | protein localization                        | 17735 | 1586 | 1802 | 220 | 170.26 | 2.10E-05 | 1.292141 | ABCG1;ADAR;AHI1;AKR1C3;AP1M1;AP2A1;AP2M1;AP3B1;APC2;APOA1;ARCN1;ARF1;ARF3;ARF6;ARFGAP3;A     |
| brown | CC | GO:0005925 | focal adhesion                              | 17735 | 127  | 1802 | 29  | 12.93  | 2.40E-05 | 2.242846 | AATF;ACIN1;AFAP1;APBB1P;ARHGAP24;ARHGAP26;ARHGAP31;BRCA1;CASS4;CDH1;DAG1;HCK;IRF2;ITGA5      |
| brown | BP | GO:0002521 | leukocyte differentiation                   | 17735 | 329  | 1802 | 60  | 35.32  | 2.60E-05 | 1.698754 | ACIN1;AP3B1;BCL6;BTk;CBFA2T3;CCL3;CD1D;CD3D;CD86;CDC42;CITED2;CSF1;CSF1R;CTNNB1;DOCK2;EGR1;  |
| brown | CC | GO:0005654 | nucleoplasm                                 | 17735 | 1481 | 1802 | 197 | 150.81 | 3.50E-05 | 1.306279 | ACIN1;ACTB;ADAR;AFF2;ALKBH2;ALKBH3;ANAPC4;ANP32A;ANXA11;APITD1;ARNT;ASH2L;ATF3;ATF7;BASP1    |
| brown | BP | GO:0006996 | organelle organization                      | 17735 | 2139 | 1802 | 284 | 229.63 | 3.50E-05 | 1.236772 | ACIN1;ACTB;ACTG1;ACTN1;ANAPC16;ANAPC1;AP1M1;AP2A1;AP2M1;AP3B1;APC2;APOA1;ARCN1;ARF1;A        |
| brown | BP | GO:0030100 | regulation of endocytosis                   | 17735 | 124  | 1802 | 29  | 13.31  | 3.90E-05 | 2.178813 | AHI1;ARF6;ATXN2;C3;CAMK1D;CBL;CD14;CNN2;DAB2;DOCK2;HCK;HIP1;HNRNPK1;LILRB1;MAGI2;MERTK;N     |
| brown | CC | GO:0044428 | nuclear part                                | 17735 | 2482 | 1802 | 309 | 252.75 | 4.50E-05 | 1.222552 | AATF;ACIN1;ACTB;ADAR;AFF2;ALKBH2;ALKBH3;ANAPC16;ANAPC4;ANP32A;ANXA11;ANXA7;APITD1;ARID1A     |
| brown | BP | GO:0019320 | hexose catabolic process                    | 17735 | 89   | 1802 | 23  | 9.55   | 4.60E-05 | 2.408377 | ALDOC;ARNT;DHTKD1;ENO1;FBP1;G6PD;GAPDH5;GCK;GLB1;GLYR1;HDC4;HIBADH;HK1;HK2;INSR;NOR1;F       |
| brown | BP | GO:0012501 | programmed cell death                       | 17735 | 1575 | 1802 | 216 | 169.08 | 5.10E-05 | 1.277502 | AATF;AATK;ACIN1;ACTN1;ACVR1B;ADAMTSL4;ADAR;AHI1;AKAP13;AKR1C3;ALB;ALDOC;ALOX15B;AMIGO2;A     |
| brown | BP | GO:0006810 | transport                                   | 17735 | 3358 | 1802 | 423 | 360.49 | 5.20E-05 | 1.173403 | ABAT;ABCS5;ABCC6;ABCG1;ACTN1;ADAR;ADCY4;ADRBK2;AHI1;AKR1C3;ALB;AMICA1;ANP32A;ANXA11;AP1      |
| brown | BP | GO:0019222 | regulation of metabolic process             | 17735 | 4834 | 1802 | 588 | 518.94 | 5.50E-05 | 1.133079 | AATF;ABCG1;ACOX1;ACVR1B;ADAP2;ADAR;ADCY4;ADK;AFF2;AGPAT1;AHI1;AKR1C3;ALDH1A1;ALKBH2;ALKB     |
| brown | BP | GO:0060255 | regulation of macromolecule metabolic pr... | 17735 | 4178 | 1802 | 515 | 448.52 | 5.60E-05 | 1.148221 | AATF;ACOX1;ACVR1B;ADAR;ADCY4;ADK;AFF2;AHI1;ALKBH2;ALKBH3;ANAPC4;ANP32A;APITD1;APLP2          |
| brown | BP | GO:0002263 | cell activation involved in immune respo... | 17735 | 133  | 1802 | 30  | 14.28  | 5.90E-05 | 2.10084  | BCL6;CCL3;CD1C;CD86;DOCK2;EXOSC3;FOXP3;GAB2;GPR183;HMOX1;IL23A;IL4R;JAK3;LAT2;LCP1;LILRB1;M  |
| brown | BP | GO:0002366 | leukocyte activation involved in immune ... | 17735 | 133  | 1802 | 30  | 14.28  | 5.90E-05 | 2.10084  | BCL6;CCL3;CD1C;CD86;DOCK2;EXOSC3;FOXP3;GAB2;GPR183;HMOX1;IL23A;IL4R;JAK3;LAT2;LCP1;LILRB1;M  |
| brown | BP | GO:0051701 | interaction with host                       | 17735 | 411  | 1802 | 70  | 44.12  | 1.50E-05 | 1.586582 | ALB;ANPEP;AP1M1;APOBEC3C;ATF7;ATP6V0A1;ATP6V0C;ATP6V0D1;ATP6V1B2;BECN1;BINP3;BRD4;CARD1      |
| brown | MF | GO:0005096 | GTPase activator activity                   | 17735 | 247  | 1802 | 46  | 25.62  | 6.00E-05 | 1.795472 | ADAP2;ALDH1A1;ARAP1;ARAP3;ARFGAP3;ARHGAP1;ARHGAP21;ARHGAP23;ARHGAP25;ARHGAI                  |
| brown | BP | GO:0006159 | apoptotic process                           | 17735 | 1562 | 1802 | 214 | 167.68 | 6.00E-05 | 1.27624  | AATF;ACIN1;ACTN1;ACVR1B;ADAMTSL4;ADAR;AHI1;AKAP13;AKR1C3;ALB;ALDOC;ALOX15B;AMIGO2;A          |
| brown | CC | GO:0042470 | melanosome                                  | 17735 | 95   | 1802 | 23  | 9.67   | 6.10E-05 | 2.37849  | ANXA11;ATP6V0A1;ATP6V1B2;BSSG;CLTC;CTSB;CTSD;DNAJC5;HSPA5;LAMP1;MMP14;MYH11;MYO7A;NCST       |
| brown | CC | GO:0048770 | pigment granule                             | 17735 | 95   | 1802 | 23  | 9.67   | 6.10E-05 | 2.37849  | ANXA11;ATP6V0A1;ATP6V1B2;BSSG;CLTC;CTSB;CTSD;DNAJC5;HSPA5;LAMP1;MMP14;MYH11;MYO7A;NCST       |
| brown | MF | GO:0005543 | phospholipid binding                        | 17735 | 487  | 1802 | 78  | 50.52  | 6.20E-05 | 1.543943 | ABCG1;ADAP2;ADRBK2;AFAP1;AKAP13;ANXA11;ANXA4;ANXA5;ANXA7;APBB1P;APOA1;APP;ARCN1;ARF1;A       |
| brown | BP | GO:0007169 | transmembrane receptor protein tyrosine ... | 17735 | 625  | 1802 | 98  | 67.09  | 6.80E-05 | 1.460724 | AATF;ADCY4;AHI1;AKAP13;ANKS1A;AP2A1;AP2M1;APLP2;APP;ARHGFE11;ARHGFE12;ARNT;ATP6V0A1;ATP      |
| brown | CC | GO:0016023 | cytoplasmic membrane-bounded vesicle        | 17735 | 848  | 1802 | 121 | 86.35  | 7.10E-05 | 1.401274 | ACTN1;ALB;ANXA11;ANXA7;AP1M1;AP2A1;AP2M1;AP3B1;APOA1;APP;ARCN1;ARHGAP21;ARHGAP30;ARH         |
| brown | CC | GO:0005912 | adherens junction                           | 17735 | 196  | 1802 | 38  | 19.96  | 7.30E-05 | 1.903808 | AATF;ACTN1;AFAP1;AHI1;APBB1P;ARHGAP24;ARHGAP26;ARHGAP31;BRCA1;CASS4;CDH1;CTNNA1;CTNNB1       |
| brown | CC | GO:0005768 | endosome                                    | 17735 | 546  | 1802 | 84  | 55.6   | 7.50E-05 | 1.510791 | ABCG1;ANKFY1;ARF6;ATP6V0A1;ATP6V0C;ATP6V0D1;CD14;CD1C;CD1D;CD68;CDH1;CHMP4B;CLCN5;CTSB;C     |
| brown | BP | GO:0031323 | regulation of cellular metabolic process    | 17735 | 4397 | 1802 | 538 | 472.03 | 7.80E-05 | 1.139758 | ABAT;ABCG1;ACOX1;ACVR1B;ADAP2;ADAR;ADCY4;AFF2;AGPAT1;AHI1;AKR1C3;ALDH1A1;ANAPC4;ANP32A;A     |
| brown | BP | GO:0016052 | carbohydrate catabolic process              | 17    |      |      |     |        |          |          |                                                                                              |

|       |    |            |                                              |       |       |      |      |         |          |          |                                                                                                                                                                                                                                                                                                                                                                                                                                                                                                                                                                                                                                                                                                                                                         |
|-------|----|------------|----------------------------------------------|-------|-------|------|------|---------|----------|----------|---------------------------------------------------------------------------------------------------------------------------------------------------------------------------------------------------------------------------------------------------------------------------------------------------------------------------------------------------------------------------------------------------------------------------------------------------------------------------------------------------------------------------------------------------------------------------------------------------------------------------------------------------------------------------------------------------------------------------------------------------------|
| brown | BP | GO:0044724 | single-organism carbohydrate catabolic p...  | 17735 | 130   | 1802 | 29   | 13.96   | 9.70E-05 | 2.077364 | ALDOC;ARNT;DHTKD1;ENO1;FBP1;G6PD;GAPDHS;GCK;GLB1;GLYR1;GM2A;GSK3A;HDAC4;HEXB;HIBADH;HK                                                                                                                                                                                                                                                                                                                                                                                                                                                                                                                                                                                                                                                                  |
| brown | CC | GO:0031981 | nuclear lumen                                | 17735 | 2101  | 1802 | 264  | 213.95  | 9.70E-05 | 1.233933 | AATF;ACIN1;ACTB;ADAR;AFF2;ALKBH2;ALKBH3;ANAPC4;ANP32A;ANXA11;APITD1;ARID1A;ARNT;ASH2L;ATF                                                                                                                                                                                                                                                                                                                                                                                                                                                                                                                                                                                                                                                               |
| brown | BP | GO:0016236 | macroautophagy                               | 17735 | 43    | 1802 | 14   | 4.62    | 9.90E-05 | 3.030303 | ATG7;BECN1;CTSD;KIAA1324;LZTS1;NBR1;PSEN1;RAB23;SQSTM1;TBC1D14;TP53INP2;ULK1;WIPI1;WIPI2                                                                                                                                                                                                                                                                                                                                                                                                                                                                                                                                                                                                                                                                |
| brown | CC | GO:0070062 | extracellular vesicular exosome              | 17735 | 62    | 1802 | 17   | 6.31    | 0.00011  | 2.694136 | AATK;ACV18;ADK;ADRBK2;AKAP13;ALPK1;ALPK3;BTX;CAMK1D;CAMK2G;CAMK2C;CASS4;CCL3;CCNK;CDKL                                                                                                                                                                                                                                                                                                                                                                                                                                                                                                                                                                                                                                                                  |
| brown | BP | GO:0046365 | monosaccharide catabolic process             | 17735 | 94    | 1802 | 23   | 10.09   | 0.00011  | 2.279485 | ALDOC;ARNT;DHTKD1;ENO1;FBP1;G6PD;GAPDHS;GCK;GLB1;GLYR1;HDAC4;HIBADH;HK1;HK2;INSR;NCOR1;F                                                                                                                                                                                                                                                                                                                                                                                                                                                                                                                                                                                                                                                                |
| brown | CC | GO:0001726 | ruffle                                       | 17735 | 124   | 1802 | 27   | 12.63   | 0.00011  | 2.137767 | ACTN1;ARAP3;ARF6;ARHGAP1;BRCA1;CFL1;CYFIP1;DBNL;EMR2;GAS7;GNAS;GSN;ITGA5;LIG4;MTRMR14;MYF                                                                                                                                                                                                                                                                                                                                                                                                                                                                                                                                                                                                                                                               |
| brown | CC | GO:0070161 | anchoring junction                           | 17735 | 214   | 1802 | 40   | 21.79   | 0.00011  | 1.835704 | AATF;ACTN1;AFAP1;AHI1;APBB1IP;ARHGAP24;ARHGAP26;ARHGAP31;BAG4L1;BRCA1;CASS4;CDH1;CTNNA                                                                                                                                                                                                                                                                                                                                                                                                                                                                                                                                                                                                                                                                  |
| brown | CC | GO:0010008 | endosome membrane                            | 17735 | 311   | 1802 | 53   | 31.67   | 0.00012  | 1.673508 | ANKFY1;ARF6;ATP6V0A1;ATP6V0C;ATP6V0D1;CD14;CD1C;CD1D;CD68;CHMP4B;CLNC5;ECE1;EHD1;EHD3;EF                                                                                                                                                                                                                                                                                                                                                                                                                                                                                                                                                                                                                                                                |
| brown | MF | GO:0016301 | kinase activity                              | 17735 | 762   | 1802 | 111  | 79.05   | 0.00012  | 1.404175 | AATK;ACV18;ADK;ADRBK2;AKAP13;ALPK1;ALPK3;BTX;CAMK1D;CAMK2G;CAMK2C;CASS4;CCL3;CCNK;CDKL                                                                                                                                                                                                                                                                                                                                                                                                                                                                                                                                                                                                                                                                  |
| brown | BP | GO:0042059 | negative regulation of epidermal growth ...  | 17735 | 39    | 1802 | 13   | 4.19    | 0.00013  | 3.102625 | AP2A1;AP2M1;CBL;CDC42;CLTA;CLTC;EPS15L1;GRB2;PSEN1;PTPR;RAB7A;SH3KBP1;SPRY2                                                                                                                                                                                                                                                                                                                                                                                                                                                                                                                                                                                                                                                                             |
| brown | BP | GO:1901185 | negative regulation of ERBB signaling pa...  | 17735 | 39    | 1802 | 13   | 4.19    | 0.00013  | 3.102625 | AP2A1;AP2M1;CBL;CDC42;CLTA;CLTC;EPS15L1;GRB2;PSEN1;PTPR;RAB7A;SH3KBP1;SPRY2                                                                                                                                                                                                                                                                                                                                                                                                                                                                                                                                                                                                                                                                             |
| brown | BP | GO:0031669 | cellular response to nutrient levels         | 17735 | 113   | 1802 | 26   | 12.13   | 0.00013  | 2.143446 | AKR1C3;ALB;ATG7;BECN1;CTSD;DAP;FBXO22;GCK;HFE;HMOX1;HSPA5;KIAA1324;LZTS1;MAX;NBR1;NUAK2;I                                                                                                                                                                                                                                                                                                                                                                                                                                                                                                                                                                                                                                                               |
| brown | CC | GO:0044437 | vacuolar part                                | 17735 | 252   | 1802 | 45   | 25.66   | 0.00013  | 1.753702 | AP1M1;AP2M1;ASAH1;ATP6V0A1;ATP6V0C;ATP6V0D1;CD1D;CD68;CTSA;CTSB;CTSD;DAPK2;GALNS;GBA;GL                                                                                                                                                                                                                                                                                                                                                                                                                                                                                                                                                                                                                                                                 |
| brown | MF | GO:0016773 | phosphotransferase activity, alcohol gro...  | 17735 | 706   | 1802 | 104  | 73.24   | 0.00013  | 1.419989 | AATK;ACV18;ADK;ADRBK2;AKAP13;ALPK1;ALPK3;BTX;CAMK1D;CAMK2G;CAMK2C;CASS4;CCL3;CCNK;CDKL                                                                                                                                                                                                                                                                                                                                                                                                                                                                                                                                                                                                                                                                  |
| brown | MF | GO:0051015 | actin filament binding                       | 17735 | 68    | 1802 | 18   | 7.05    | 0.00014  | 2.553191 | ACTN1;CORO1C;CTNNA1;CYFIP1;DBNL;ERMN;FSCN1;GAS7;LASP1;LCP1;MAP1S;MYH9;MYO7A;RCE1;SPTB;SCL                                                                                                                                                                                                                                                                                                                                                                                                                                                                                                                                                                                                                                                               |
| brown | CC | GO:0044400 | endosomal part                               | 17735 | 320   | 1802 | 54   | 32.59   | 0.00014  | 1.656595 | ANKFY1;ARF6;ATP6V0A1;ATP6V0C;ATP6V0D1;CD14;CD1C;CD1D;CD68;CHMP4B;CLNC5;RCS1;EHD1;EH                                                                                                                                                                                                                                                                                                                                                                                                                                                                                                                                                                                                                                                                     |
| brown | BP | GO:0044403 | symbiosis, encompassing mutualism through... | 17735 | 445   | 1802 | 73   | 47.77   | 0.00014  | 1.528156 | ALB;ANPEP;AP1M1;APOBEC3C;ATF7;ATP6V0A1;ATP6V0C;ATP6V0D1;ATP6V1B2;BECN1;BNIP3;BRD4;CARM1                                                                                                                                                                                                                                                                                                                                                                                                                                                                                                                                                                                                                                                                 |
| brown | BP | GO:0044419 | interspecies interaction between organiz...  | 17735 | 445   | 1802 | 73   | 47.77   | 0.00014  | 1.528156 | ALB;ANPEP;AP1M1;APOBEC3C;ATF7;ATP6V0A1;ATP6V0C;ATP6V0D1;ATP6V1B2;BECN1;BNIP3;BRD4;CARM1                                                                                                                                                                                                                                                                                                                                                                                                                                                                                                                                                                                                                                                                 |
| brown | BP | GO:0045321 | leukocyte activation                         | 17735 | 552   | 1802 | 87   | 59.26   | 0.00014  | 1.468107 | ADK;AP3B1;BCL6;BLOCS13;BTX;BTN3A1;CCL3;CD1C;CD1D;CD209;CD3D;CD68;CD93;CDCA2;CHRN2;CSF1;C                                                                                                                                                                                                                                                                                                                                                                                                                                                                                                                                                                                                                                                                |
| brown | BP | GO:0060988 | pentose-phosphate shunt                      | 17735 | 13    | 1802 | 7    | 1.4     | 0.00015  | 5        | G6PD;GLYR1;HIBADH;PGAM1;PGD;TALDO1;TKT                                                                                                                                                                                                                                                                                                                                                                                                                                                                                                                                                                                                                                                                                                                  |
| brown | MF | GO:0004672 | protein kinase activity                      | 17735 | 595   | 1802 | 90   | 61.72   | 0.00015  | 1.458198 | AATK;ACV18;ADK;ADRBK2;AKAP13;ALPK1;ALPK3;BTX;CAMK1D;CAMK2G;CAMK2C;CASS4;CCL3;CCNK;CDKL3;CH                                                                                                                                                                                                                                                                                                                                                                                                                                                                                                                                                                                                                                                              |
| brown | BP | GO:0009987 | cellular process                             | 17735 | 12861 | 1802 | 1423 | 1380.65 | 0.00015  | 1.030674 | AATF;AATK;ABAT;ABCC5;ABCC6;ABCG1;ABHD2;ACIN1;ACO1;ACOX1;ACP1;ACSM1;ACSM3;ACSS2;ACTA1;AC                                                                                                                                                                                                                                                                                                                                                                                                                                                                                                                                                                                                                                                                 |
| brown | BP | GO:0016197 | endosomal transport                          | 17735 | 140   | 1802 | 30   | 15.03   | 0.00016  | 1.996008 | AP1M1;AP2A1;ARL1;BLOC1S3;CHMP4B;DAB2;DENND3;EHD1;EHD3;ERC1;FAM160A2;FAM21A;FAM21C;GOC                                                                                                                                                                                                                                                                                                                                                                                                                                                                                                                                                                                                                                                                   |
| brown | BP | GO:0048193 | Golgi vesicle transport                      | 17735 | 181   | 1802 | 36   | 19.43   | 0.00018  | 1.852805 | AP1M1;AP2A1;ARCN1;ARF1;ARL1;BLOC1S3;CLTA;CLTC;COPA;COPB2;CUX1;DNM2;ERGIC1;GDC1;LUGAS;GO                                                                                                                                                                                                                                                                                                                                                                                                                                                                                                                                                                                                                                                                 |
| brown | BP | GO:0016568 | chromatin modification                       | 17735 | 434   | 1802 | 71   | 46.59   | 0.00019  | 1.523932 | ARID1A;ASH2L;BAZZA;BCOR;BCORL1;BNIP3;BRCA1;BRD3;BRD4;BRD8;BRE;BRPF3;CARM1;CBX6;CEPH3;CHD                                                                                                                                                                                                                                                                                                                                                                                                                                                                                                                                                                                                                                                                |
| brown | MF | GO:0046872 | metal ion binding                            | 17735 | 3936  | 1802 | 468  | 408.31  | 0.00019  | 1.146188 | ACO1;ACSM1;ACSM3;ACTN1;ACV18;ADAL;ADAM19;ADAP2;ADAR;ADCY4;ADPRH;AGBL2;A                                                                                                                                                                                                                                                                                                                                                                                                                                                                                                                                                                                                                                                                                 |
| brown | CC | GO:0043230 | extracellular organelle                      | 17735 | 65    | 1802 | 17   | 6.62    | 2.00E-04 | 2.567976 | ACTA1;ACTB;ACTG1;ACTN1;ALB;ANXA5;C3;CLTC;ENO1;GSN;LTBP2;MSN;MYH9;MYOF;TFGB1;TLN1;VIM                                                                                                                                                                                                                                                                                                                                                                                                                                                                                                                                                                                                                                                                    |
| brown | CC | GO:0065010 | extracellular membrane-bounded organelle     | 17735 | 65    | 1802 | 17   | 6.62    | 2.00E-04 | 2.567976 | ACTA1;ACTB;ACTG1;ACTN1;ALB;ANXA5;C3;CLTC;ENO1;GSN;LTBP2;MSN;MYH9;MYOF;TFGB1;TLN1;VIM                                                                                                                                                                                                                                                                                                                                                                                                                                                                                                                                                                                                                                                                    |
| brown | BP | GO:0007033 | vacuole organization                         | 17735 | 62    | 1802 | 17   | 6.66    | 2.00E-04 | 2.552553 | BECN1;CTSD;FAM160A2;FIG4;GBA;HEXB;KIAA1324;MYO7A;PPT1;PSEN1;RAB23;TBC1D14;TGFB1;TPP1;U                                                                                                                                                                                                                                                                                                                                                                                                                                                                                                                                                                                                                                                                  |
| brown | CC | GO:0030027 | lamellipodium                                | 17735 | 122   | 1802 | 26   | 12.42   | 2.00E-04 | 2.093398 | APBB1IP;APC2;ARAP3;ARHGAP31;CAPZB;CFL1;CTNNA1;CTNNB1;CTNND1;CYFIP1;DAG1;DBNL;DYSF;GSN;HA                                                                                                                                                                                                                                                                                                                                                                                                                                                                                                                                                                                                                                                                |
| brown | BP | GO:0048011 | nerve growth factor receptor signaling p...  | 17735 | 223   | 1802 | 42   | 23.94   | 2.00E-04 | 1.754386 | AATF;ADCY4;AKAP13;AP2A1;AP2M1;ARHGFE11;ARHGFE12;CAS9P;CLTA;CLTC;ELK1;FOXO4;FURIN;GRB2;I                                                                                                                                                                                                                                                                                                                                                                                                                                                                                                                                                                                                                                                                 |
| brown | BP | GO:0051234 | establishment of localization                | 17735 | 3408  | 1802 | 423  | 365.85  | 2.00E-04 | 1.156212 | ABAT;ABCC5;ABCC6;ABCG1;ACTN1;ADAR;ADCY4;ADRBK2;AHI1;AKR1C3;ALB;AMICA1;ANP32A;ANXA11;AP1                                                                                                                                                                                                                                                                                                                                                                                                                                                                                                                                                                                                                                                                 |
| brown | BP | GO:0000045 | autophagic vacuole assembly                  | 17735 | 26    | 1802 | 10   | 2.79    | 0.00021  | 3.584229 | BECN1;CTSD;KIAA1324;PSEN1;RAB23;TBC1D14;TP53INP2;ULK1;WIPI1;WIPI2                                                                                                                                                                                                                                                                                                                                                                                                                                                                                                                                                                                                                                                                                       |
| brown | BP | GO:0042594 | response to starvation                       | 17735 | 110   | 1802 | 25   | 11.81   | 0.00021  | 2.11685  | ADSL;AKR1C3;ALB;ATG7;BECN1;CTSD;DAP;FBXO22;GCK;HFE;HSPA5;KIAA1324;LZTS1;MAX;NBR1;NUAK2;PRI                                                                                                                                                                                                                                                                                                                                                                                                                                                                                                                                                                                                                                                              |
| brown | BP | GO:0046469 | lymphocyte activation                        | 17735 | 468   | 1802 | 75   | 50.24   | 0.00024  | 1.492834 | ADK;AP3B1;BCL6;BLOCS13;BTX;BTN3A1;CD1C;CD1D;CD209;CD3D;CD68;CDCA2;CHRN2B;CTNNA1;DOCK2;EC                                                                                                                                                                                                                                                                                                                                                                                                                                                                                                                                                                                                                                                                |
| brown | BP | GO:0050776 | regulation of immune response                | 17735 | 560   | 1802 | 87   | 60.12   | 0.00024  | 1.447106 | AMICA1;APOA1;BCL6;BTX;BTN3A1;C1RL;C3;C4BPB;CSAR1;CD14;CD1D;CD3D;CD68;CHRN2B;CTNNA1;DOCK2;EC                                                                                                                                                                                                                                                                                                                                                                                                                                                                                                                                                                                                                                                             |
| brown | BP | GO:0044267 | cellular protein metabolic process           | 17735 | 3210  | 1802 | 400  | 344.6   | 0.00024  | 1.160766 | AATK;ACO1;ACTB;ACV18;ADAR;ADCY4;ADHS;ADPRH;AGA;ALG14;ALGS;ANAPC16;ANAPC4;APITD1;APLP2;A                                                                                                                                                                                                                                                                                                                                                                                                                                                                                                                                                                                                                                                                 |
| brown | BP | GO:0019219 | regulation of nucleobase-containing comp...  | 17735 | 3414  | 1802 | 423  | 366.5   | 0.00024  | 1.154161 | AATF;ABCG1;ACV18;ADAP2;AFF2;AHI1;ALDH1A1;ANP32A;APP;ARAP1;ARAP3;ARFGAP3;ARHGAP26;ARHG                                                                                                                                                                                                                                                                                                                                                                                                                                                                                                                                                                                                                                                                   |
| brown | BP | GO:0030029 | actin filament-based process                 | 17735 | 484   | 1802 | 77   | 51.96   | 0.00025  | 1.481909 | ACTA1;ACTG1;ACTN1;ARAP1;ARF6;ARHGAP26;ARHGAP28;ARHGFE10;ARHGFE11;BCL6;CAP1;CAPZB;CDC42;CI                                                                                                                                                                                                                                                                                                                                                                                                                                                                                                                                                                                                                                                               |
| brown | BP | GO:0051171 | regulation of nitrogen compound metaboli...  | 17735 | 3496  | 1802 | 432  | 375.3   | 0.00025  | 1.151079 | AATF;ABCG1;ACV18;ADAP2;AFF2;AHI1;ALDH1A1;ANP32A;APP;ARAP1;ARAP3;ARFGAP3;ARHGAP26;ARHG                                                                                                                                                                                                                                                                                                                                                                                                                                                                                                                                                                                                                                                                   |
| brown | BP | GO:0080090 | regulation of primary metabolic process      | 17735 | 4337  | 1802 | 526  | 465.58  | 0.00025  | 1.129774 | AATF;ACO1;ACV18;ADAP2;ADAR;ADCY4;AFF2;AHI1;ALDH1A1;ANP32A;APP;ARAP1;ARAP3;ARFGAP3;ARHG                                                                                                                                                                                                                                                                                                                                                                                                                                                                                                                                                                                                                                                                  |
| brown | BP | GO:0019048 | virus-host interaction                       | 17735 | 371   | 1802 | 62   | 39.83   | 0.00026  | 1.556616 | ANPEP;AP1M1;APOBEC3C;ATF7;ATP6V0C;BECN1;BNIP3;BRD4;CARM1;CD1D;CD209;CD68;CD93;CFAR;CREE                                                                                                                                                                                                                                                                                                                                                                                                                                                                                                                                                                                                                                                                 |
| brown | BP | GO:0071702 | organic substance transport                  | 17735 | 1950  | 1802 | 255  | 209.34  | 0.00026  | 1.218114 | ABCC5;ABCG1;ADAR;AKR1C3;ALB;AP1M1;AP2A1;AP2M1;AP3B1;APC2;APOA1;APOBR;ARCN1;ARF1;ARF3;AR                                                                                                                                                                                                                                                                                                                                                                                                                                                                                                                                                                                                                                                                 |
| brown | BP | GO:0006914 | autophagy                                    | 17735 | 118   | 1802 | 26   | 12.67   | 0.00027  | 2.052092 | ATG2A;ATG7;BECN1;CTSD;DAP;DAPK1;DAPK2;FIS1;FUNDC1;KIAA1324;LAMP1;LZTS1;NBR1;PI3K;PIK1;PSE                                                                                                                                                                                                                                                                                                                                                                                                                                                                                                                                                                                                                                                               |
| brown | BP | GO:0060740 | NADPH regeneration                           | 17735 | 14    | 1802 | 7    | 1.5     | 0.00028  | 4.666667 | G6PD;GLYR1;HIBADH;PGAM1;PGD;TALDO1;TKT                                                                                                                                                                                                                                                                                                                                                                                                                                                                                                                                                                                                                                                                                                                  |
| brown | BP | GO:0032786 | positive regulation of DNA-dependent tra...  | 17735 | 18    | 1802 | 8    | 1.93    | 0.00028  | 4.145078 | BRD4;DAB2;ELL;ELL3;MAP2K1;PAF1;RTF1;WDR61                                                                                                                                                                                                                                                                                                                                                                                                                                                                                                                                                                                                                                                                                                               |
| brown | MF | GO:0045296 | cadherin binding                             | 17735 | 23    | 1802 | 9    | 2.39    | 0.00029  | 3.76569  | CTNNA1;CTNNA11;CTNNA12;CTNNA13;CTNNA14;CTNNA15;CTNNA16;CTNNA17;CTNNA18;CTNNA19;CTNNA20;CTNNA21;CTNNA22;CTNNA23;CTNNA24;CTNNA25;CTNNA26;CTNNA27;CTNNA28;CTNNA29;CTNNA30;CTNNA31;CTNNA32;CTNNA33;CTNNA34;CTNNA35;CTNNA36;CTNNA37;CTNNA38;CTNNA39;CTNNA40;CTNNA41;CTNNA42;CTNNA43;CTNNA44;CTNNA45;CTNNA46;CTNNA47;CTNNA48;CTNNA49;CTNNA50;CTNNA51;CTNNA52;CTNNA53;CTNNA54;CTNNA55;CTNNA56;CTNNA57;CTNNA58;CTNNA59;CTNNA60;CTNNA61;CTNNA62;CTNNA63;CTNNA64;CTNNA65;CTNNA66;CTNNA67;CTNNA68;CTNNA69;CTNNA70;CTNNA71;CTNNA72;CTNNA73;CTNNA74;CTNNA75;CTNNA76;CTNNA77;CTNNA78;CTNNA79;CTNNA80;CTNNA81;CTNNA82;CTNNA83;CTNNA84;CTNNA85;CTNNA86;CTNNA87;CTNNA88;CTNNA89;CTNNA90;CTNNA91;CTNNA92;CTNNA93;CTNNA94;CTNNA95;CTNNA96;CTNNA97;CTNNA98;CTNNA99;CTNNA100 |
| brown | MF | GO:0060589 | nucleoside-triphosphatase regulator acti...  | 17735 | 447   | 1802 | 70   | 46.37   | 0.00029  | 1.509597 | ADAP2;AKAP13;ALDH1A1;ARAP1;ARAP3;ARFGAP3;ARHGAP1;ARHGAP21;ARHGAP23;ARHGAP24;ARHGAP25                                                                                                                                                                                                                                                                                                                                                                                                                                                                                                                                                                                                                                                                    |
| brown | CC | GO:0012505 | endomembrane system                          | 17735 | 1768  | 1802 | 223  | 180.04  | 0.00029  | 1.238614 | ABCG1;AGPAT1;ALG14;ALGS;ANXA11;ANXA7;AP1M1;AP2A1;AP2M1;AP3B1;APC2;APP;ARAP1;ARCN1;ARF1;                                                                                                                                                                                                                                                                                                                                                                                                                                                                                                                                                                                                                                                                 |
| brown | BP | GO:0044237 | cellular metabolic process                   | 17735 | 8597  | 1802 | 986  | 922.9   | 0.00031  | 1.068371 | AATF;AATK;ABAT;ABCG1;ACIN1;ACO1;ACOX1;ACSM1;ACSM3;ACSS2;ACTB;ACV18;ACY1;ACY2;ADAL;ADP                                                                                                                                                                                                                                                                                                                                                                                                                                                                                                                                                                                                                                                                   |
| brown | CC | GO:0045335 | phagocytic vesicle                           | 17735 | 68    | 1802 | 17   | 6.92    | 0.00036  | 2.456647 | ANXA11;ATP6V0A1;ATP6V0C;ATP6V0D1;HLA-B;HLA-C;HLA-E;NCF2;RAB11FIP1;RAB23;RAB43;RAB7A;RAB8A                                                                                                                                                                                                                                                                                                                                                                                                                                                                                                                                                                                                                                                               |
| brown | BP | GO:0045730 | respiratory burst                            | 17735 | 23    | 1802 | 9    | 2.47    | 0.00037  | 3.643725 | CAMK1D;HCK;INSR;NCF2;PGAM1;PIK3CD;RAC1;RAC2;SLC11A1                                                                                                                                                                                                                                                                                                                                                                                                                                                                                                                                                                                                                                                                                                     |
| brown | BP | GO:0006886 | intracellular protein transport              | 17735 | 702   | 1802 | 104  | 75.36   | 0.00037  | 1.380042 | ADAR;AKR1C3;AP1M1;AP2A1;AP2M1;AP3B1;APC2;ARCN1;ARFGAP3;ARL6;BCL6;C11orf73;C1QTNF3;CDC42;                                                                                                                                                                                                                                                                                                                                                                                                                                                                                                                                                                                                                                                                |
| brown | BP | GO:0051252 | regulation of RNA metabolic process          | 17735 | 2953  | 1802 | 369  | 317.01  | 0.00037  | 1.164001 | AATF;ABCG1;ACV18;ADAP2;AFF2;AHI1;ANP32A;APP;ARHGFE11;ARID1A;ARID3B;ARNT;ASC2;ASH2L;ATF                                                                                                                                                                                                                                                                                                                                                                                                                                                                                                                                                                                                                                                                  |
| brown | BP | GO:0044260 | cellular macromolecule metabolic process     | 17735 | 6621  | 1802 | 774  | 710.78  | 0.00038  | 1.088945 | AATF;AATK;ABCG1;ACIN1;ACO1;ACTB;ACV18;ADAR;ADCY4;ADHS;ADPRH;ADRBK2;AFF2;AGA;AHI1;ALG14;A                                                                                                                                                                                                                                                                                                                                                                                                                                                                                                                                                                                                                                                                |
| brown | BP | GO:0002576 | platelet degranulation                       | 17735 | 83    | 1802 | 20   | 8.91    | 0.00039  | 2.244669 | ACTN1;ALB;APOA1;APP;BRPF3;CAP1;CFL1;F13A1;HSPA5;LEFTY2;P2RX1;PECAM1;PLEK;PSAP;SERPIN1A;SOD1                                                                                                                                                                                                                                                                                                                                                                                                                                                                                                                                                                                                                                                             |
| brown | MF | GO:0030695 | GTPase regulator activity                    | 17735 | 436   | 1802 | 68   | 45.23   | 0.00039  | 1.503427 | ADAP2;AKAP13;ALDH1A1;ARAP1;ARAP3;ARFGAP3;ARHGAP1;ARHGAP21;ARHGAP23;ARHGAP24;ARHGAP25                                                                                                                                                                                                                                                                                                                                                                                                                                                                                                                                                                                                                                                                    |
| brown | MF | GO:0003824 | catalytic activity                           | 17735 | 5264  | 1802 | 607  | 546.08  | 0.00039  | 1.111559 | AATK;ABAT;ABCC5;ABCC6;ABCG1;ABHD2;ABHD4;ACIN1;ACO1;ACOX1;ACP1;ACSM1;ACSM3;ACSS2;ACV18;B                                                                                                                                                                                                                                                                                                                                                                                                                                                                                                                                                                                                                                                                 |
| brown | CC | GO:0005775 | vacuolar lumen                               | 17735 | 75    | 1802 | 18   | 7.64    | 0.00042  | 2.356021 | ASHA1;CTSA;CTSB;CTSD;DAPK2;GALNS;GBA;GLB1;GM2A;GNS;HEXB;NEU1;PLBD2;PSM;RNASSET2;TPP1;TXN                                                                                                                                                                                                                                                                                                                                                                                                                                                                                                                                                                                                                                                                |
| brown | BP | GO:2000284 | positive regulation of immune system pro...  | 17735 | 554   | 1802 | 85   | 59.47   | 0.00042  | 1.429292 | ADK;AP3B1;BCL6;BLOCS13;BTX;BTN3A1;C1RL;C3;C4BPB;CSAR1;CAMK1D;CCL3;CD14;CD1D;CD3D;CD68;CDC                                                                                                                                                                                                                                                                                                                                                                                                                                                                                                                                                                                                                                                               |
| brown | BP | GO:0002576 | regulation of cellular macromolecule bio...  | 17735 | 3117  | 1802 | 387  | 334.62  | 0.00042  | 1.156536 | AATF;ACO1;ACV18;ADAP2;ADAR;ADCY4;AFF2;AHI1;ALDH1A1;ANP32A;APP;ARHGFE11;ARID1A;ARID3B;ARNT;ASC2;ASH2L;ATF                                                                                                                                                                                                                                                                                                                                                                                                                                                                                                                                                                                                                                                |
| brown | BP | GO:0010556 | regulation of macromolecule biosynthetic...  | 17735 | 3197  | 1802 | 396  | 343.2   | 0.00042  | 1.153846 | AATF;ABCG1;ACO1;ACV18;AHI1;ANP32A;APP;ARHGFE11;ARID1A;ARID3A;ARID3B;ARNT;ASC2;ASH2L;ATF                                                                                                                                                                                                                                                                                                                                                                                                                                                                                                                                                                                                                                                                 |
| brown | BP | GO:0016569 | covalent chromatin modification              | 17735 | 274   | 1802 | 48   | 29.41   | 0.00043  | 1.632098 | ASH2L;BAZZA;BCOR;BRCA1;BRD                                                                                                                                                                                                                                                                                                                                                                                                                                                                                                                                                                                                                                                                                                                              |

|       |    |            |                                              |       |      |      |     |        |          |          |                                                                                                   |
|-------|----|------------|----------------------------------------------|-------|------|------|-----|--------|----------|----------|---------------------------------------------------------------------------------------------------|
| brown | BP | GO:0006479 | protein methylation                          | 17735 | 79   | 1802 | 19  | 8.48   | 0.00055  | 2.240566 | ASH2L;BAZZA2;BCOR;BRCA1;BTG2;CARM1;DNMT3B;JARID2;MLL2;MYB;N6AMT1;NSD1;PRMT5;PRMT6;RAB3            |
| brown | MF | GO:0008213 | protein alkylation                           | 17735 | 79   | 1802 | 19  | 8.48   | 0.00055  | 2.240566 | ASH2L;BAZZA2;BCOR;BRCA1;BTG2;CARM1;DNMT3B;JARID2;MLL2;MYB;N6AMT1;NSD1;PRMT5;PRMT6;RAB3            |
| brown | MF | GO:0006474 | protein serine/threonine kinase activity     | 17735 | 434  | 1802 | 67  | 45.02  | 0.00057  | 1.488227 | AATK;ACVR1B;ADRBK2;AKAP13;ALPK1;ALPK3;CAMK1D;CAMK2G;CAMK2C;CCL3;CCNK;CDK13;CHEK1;CSNK1I           |
| brown | BP | GO:0051716 | cellular response to stimulus                | 17735 | 5052 | 1802 | 601 | 542.34 | 0.00057  | 1.108161 | AATF;ACSM1;ACSS2;ACVR1B;ADAP2;ADAR;ADCY4;ADRBK2;AGPAT1;AHI1;JAKP13;AKR1C3;ALDH1A1;AL              |
| brown | BP | GO:0051568 | histone H3-K4 methylation                    | 17735 | 29   | 1802 | 10  | 3.11   | 0.00058  | 3.215434 | ASH2L;BCOR;BRCA1;DNMT3B;MLL2;MYB;RTF1;SETD1B;WDR61;WDR82                                          |
| brown | BP | GO:0031347 | regulation of defense response               | 17735 | 428  | 1802 | 68  | 45.95  | 0.00059  | 1.479869 | AOAH;AP1M1;AP2A1;AP2M1;APOA1;ARF1;BCL6;BTG1;CIQTNF3;C3;C4B1BP;CCL3;CD14;CD1D;CD86;COLEC12;        |
| brown | CC | GO:0043202 | lysosomal lumen                              | 17735 | 71   | 1802 | 17  | 7.23   | 0.00062  | 2.351314 | ASAH1;CTSA;CTSB;CTSD;GALNS;GBA;GLB1;GM2A;GNS;HEXB;NEU1;PLBD2;PSAP;RNASET2;TPP1;TXND5;VC           |
| brown | BP | GO:0044765 | single-organism transport                    | 17735 | 2753 | 1802 | 344 | 295.54 | 0.00062  | 1.163971 | ABAT;ABCC5;ABCC6;ABCG1;ACTN1;ADAR;ADCY4;ADRBK2;AHI1;AKR1C3;ALB;AMICA1;ANXA11;AP1M1;AP2A           |
| brown | MF | GO:0051019 | mitogen-activated protein kinase binding     | 17735 | 16   | 1802 | 7   | 1.66   | 0.00063  | 4.216867 | ATF7;GTFC21;MAPKAPK5;MICALCL;NBR1;PTPRJ;TNIP1                                                     |
| brown | MF | GO:0019901 | protein kinase binding                       | 17735 | 357  | 1802 | 57  | 37.03  | 0.00063  | 1.539292 | ACTB;ATF7;CASP9;CCNK;CDC42;CTNNB11;FAM58A;FOXO4;GRB2;GSK3A;GTF2I;HCLS1;HDAC4;IFNAR2;IRS2;IT       |
| brown | BP | GO:0002764 | immune response-regulating signaling pat...  | 17735 | 250  | 1802 | 44  | 26.84  | 0.00066  | 1.639344 | BTX;BTN3A1;CSAR1;CD14;CD3D;CD86;COLEC12;ELK1;FOXP3;HCK;HLA-DPA1;IRAK2;KLRCA-KLRK1;LAT2;LCP2       |
| brown | BP | GO:0006955 | immune response                              | 17735 | 1081 | 1802 | 149 | 116.05 | 0.00066  | 1.283929 | ADAR;AMICA1;APOA1;APP;ARHGDI8;BCL6;BTX;BTN3A1;C1RL;C3;C4B1BP;CSAR1;CALCOCO2;CAMK2G;CCL3;C         |
| brown | BP | GO:0031325 | positive regulation of cellular metaboli...  | 17735 | 1911 | 1802 | 247 | 205.15 | 0.00066  | 1.203997 | AATF;ACVR1B;ADCY4;AGPAT1;AHI1;AKR1C3;ANAPCA4;APITD1;APOA1;APP;ARHGEF10;ARHGEF11;ARID1A;AR         |
| brown | BP | GO:0042110 | T cell activation                            | 17735 | 339  | 1802 | 56  | 36.39  | 0.00068  | 1.538884 | ADK;AP3B1;BCL6;BTN3A1;CD1C;CD1D;CD209;CD3D;CD86;COLEC12;CTNNB1;DOCK2;EGR1;ELF4;FKBP1A;FLT3;I      |
| brown | MF | GO:0016772 | transferase activity, transferring phosph... | 17735 | 889  | 1802 | 122 | 92.22  | 0.00068  | 1.322923 | AAK1;ACVR1B;ADK;ADRBK2;AKAP13;ALPK1;ALPK3;BTX;CAMK1D;CAMK2G;CAMK2C;CASS4;CCDC111;CCL3;C           |
| brown | BP | GO:0045637 | regulation of myeloid cell differentiat...   | 17735 | 132  | 1802 | 27  | 14.17  | 0.00072  | 1.905434 | ACTN1;ACVR1B;ARNT;CCL3;CSF1;CTNNB1;GNAS;HAX1;KIF11;KZF1;L2L3;HSPA1B;KIF13;LILRB1;MAFB;MAP         |
| brown | BP | GO:0033554 | cellular response to stress                  | 17735 | 1209 | 1802 | 164 | 129.79 | 0.00074  | 1.26358  | AATF;AKR1C3;ALB;ALDH3B1;ALKBH2;ALKBH3;APITD1;APOA1;ARNT;ASH2L;ATG7;ATP6V0D1;BCCIP;BCL6;BEC        |
| brown | BP | GO:0002757 | immune response-activating signal transd...  | 17735 | 237  | 1802 | 42  | 25.44  | 0.00075  | 1.650943 | BTX;BTN3A1;CSAR1;CD14;CD3D;CD86;COLEC12;ELK1;FOXP3;HCK;HLA-DPA1;IRAK2;KLRCA-KLRK1;LAT2;LCP2       |
| brown | BP | GO:2000377 | regulation of reactive oxygen species me...  | 17735 | 57   | 1802 | 15  | 6.12   | 0.00076  | 2.45098  | AATF;AKR1C3;BCO2;GRB2;MAPK14;PID1;PRKCD;PTK2B;RAC1;RAC2;PIP1;RNFA41;RMC4;RMC5;TGFBI               |
| brown | MF | GO:0019904 | protein domain specific binding              | 17735 | 535  | 1802 | 79  | 55.5   | 0.00076  | 1.423423 | AATF;ACP1;ACTN1;ADAM19;APP;ARHGAP1;ARHGAP26;ARHGAP27;ARHGAP31;ARL1;BASP1;BHLHE40;BIN2;            |
| brown | BP | GO:1901184 | regulation of ERBB signaling pathway         | 17735 | 63   | 1802 | 16  | 6.76   | 0.00078  | 2.366864 | AP2A1;AP2M1;APLP2;APP;CBL;CDC42;CLTA;CLTC;EPS15L1;GRB2;PSEN1;PTPRJ;RAB7A;RBPJ;SH3KB1;SPRY2        |
| brown | BP | GO:0032968 | positive regulation of transcription elo...  | 17735 | 12   | 1802 | 6   | 1.29   | 0.00079  | 4.651163 | BRD4;DAB2;MAP2K1;PAF1;RTF1;WDR61                                                                  |
| brown | BP | GO:0018193 | peptidyl-amino acid modification             | 17735 | 653  | 1802 | 96  | 70.1   | 8.00E-04 | 1.369472 | ACVR1B;ADHS;ALG14;ALGS;APOA1;B4GALT1;B4GALT4;B4GALT5;BRCA1;BRD4;BRB8;BRPF3;BTX;CD44;ADC4          |
| brown | BP | GO:0034968 | histone lysine methylation                   | 17735 | 46   | 1802 | 13  | 4.94   | 0.00081  | 2.631579 | ASH2L;BAZZA2;BCOR;BRCA1;DNMT3B;JARID2;MLL2;MYB;NSD1;RTF1;SETD1B;WDR61;WDR82                       |
| brown | BP | GO:0006355 | regulation of transcription, DNA-depende...  | 17735 | 2869 | 1802 | 356 | 307.99 | 0.00081  | 1.155882 | AATF;ABCG1;ACVR1B;AHI1;ANP32A;APP;ARHGEF11;ARID1A;ARID3A;ARID3B;ARNT;ASCC2;ASH2L;ATF5;ATC         |
| brown | BP | GO:0004703 | regulation of leukocyte mediated immun...    | 17735 | 94   | 1802 | 21  | 10.09  | 0.00083  | 2.081269 | BCL6;BTX;C3;CRTAM;FOXP3;GAB2;HMOX1;IL23A;IL4R;JAK3;LCP1;LILRB1;MYB;PLNC2;PRMT1;PVR;SH2D1A;STAT5A; |
| brown | MF | GO:0030234 | enzyme regulator activity                    | 17735 | 970  | 1802 | 131 | 100.63 | 0.00083  | 1.301799 | ADAP2;AKAP13;ALDH1A1;ANXA4;ANXA5;APLP2;APOA1;APP;ARAP1;ARAP3;ARFGAP3;ARHGAP1;ARHGAP21;            |
| brown | BP | GO:2001141 | regulation of RNA biosynthetic process       | 17735 | 2889 | 1802 | 358 | 310.14 | 0.00086  | 1.154317 | AATF;ABCG1;ACVR1B;AHI1;ANP32A;APP;ARHGEF11;ARID1A;ARID3A;ARID3B;ARNT;ASCC2;ASH2L;ATF5;ATP         |
| brown | BP | GO:0002285 | lymphocyte activation involved in immune...  | 17735 | 88   | 1802 | 20  | 9.45   | 0.00087  | 2.116402 | BCL6;CD1C;CD86;EXOSC3;FOXP3;GPR183;IL23A;IL4R;JAK3;LCP1;LILRB1;MYB;PLNC2;PRMT1;PVR;SH2D1A;STAT5A; |
| brown | BP | GO:0030218 | erythrocyte differentiation                  | 17735 | 88   | 1802 | 20  | 9.45   | 0.00087  | 2.116402 | ACIN1;ACVR1B;ARNT;ATP1F1;BCL6;CITED2;G6PD;HCLS1;HIPK2;HSPA1B;KLF13;MAEA;MAFB;MAPK14;NCOR1         |
| brown | MF | GO:0031072 | heat shock protein binding                   | 17735 | 91   | 1802 | 20  | 9.44   | 0.00088  | 2.118644 | ATF5;BCOR;C11orf73;CSNK2A1;DNAJB2;DNAJB5;DNAJB6;DNAJC13;DNAJC14;DNAJC19;DNAJC5;C                  |
| brown | BP | GO:0051173 | positive regulation of nitrogen compound...  | 17735 | 1214 | 1802 | 164 | 130.32 | 0.00089  | 1.258441 | AATF;ACVR1B;AHI1;APP;ARHGEF10;ARHGEF11;ARID1A;ARID3A;ARNT;ASH2L;BCL9;BRCA1;BRD4;BRE;BTG2;C        |
| brown | BP | GO:0010467 | gene expression                              | 17735 | 4403 | 1802 | 527 | 472.67 | 0.00092  | 1.114943 | AATF;ABCG1;ACO1;ACVR1B;ADAR;ADK;AFF2;AGA;AHI1;ALKBH2;ALKBH3;ANP32A;APITD1;APOA1;APOBEC3           |
| brown | BP | GO:0043412 | macromolecule modification                   | 17735 | 2584 | 1802 | 323 | 277.4  | 0.00093  | 1.164384 | AATF;ABCG1;ACVR1B;ADAR;ADCY4;ADHS;ADPRH;AGA;ALG14;ALGS;ALKBH2;ALKBH3;ANAPC16;ANAPCA4;APITD1;AP    |
| brown | BP | GO:0034101 | erythrocyte homeostasis                      | 17735 | 95   | 1802 | 21  | 10.2   | 0.00096  | 2.058824 | ACIN1;ACVR1B;ARNT;ATP1F1;BCL6;CITED2;G6PD;HCLS1;HIPK2;HMOX1;HSPA1B;KLF13;MAEA;MAFB;MAPK14;        |
| brown | BP | GO:0007167 | enzyme linked receptor protein signaling...  | 17735 | 884  | 1802 | 124 | 94.9   | 0.00096  | 1.306639 | AATF;ACVR1B;ADCY4;AHI1;AKAP13;ANKS1A;AP2A1;AP2M1;APLP2;APP;ARHGEF11;ARHGEF12;ARNT;ATP6V           |
| brown | BP | GO:0006110 | regulation of glycolysis                     | 17735 | 21   | 1802 | 8   | 2.25   | 0.00098  | 3.555556 | ARNT;FBP1;GAPDH5;GCK;HDAC4;INSR;NCOR1;PGAM1                                                       |
| brown | BP | GO:0042113 | B cell activation                            | 17735 | 169  | 1802 | 32  | 18.14  | 0.00099  | 1.764057 | BCL6;BTX;CD86;CHRN2;EXOSC3;FLT3;FOXP3;GPR183;HDAC4;IFIT3;JAK3;LAT2;MYB;NFAM1;NHEJ1;NC             |
| brown | BP | GO:0048872 | homeostasis of number of cells               | 17735 | 176  | 1802 | 33  | 18.89  | 0.00099  | 1.746956 | ACIN1;ACVR1B;ARNT;ATP1F1;ATXN2;BCL6;CITED2;CSF1;FLT3;FOXP3;G6PD;GIGYF2;HCLS1;HIPK2;HMOX1;HSI      |
| brown | BP | GO:0009889 | regulation of biosynthetic process           | 17735 | 3356 | 1802 | 410 | 360.27 | 0.00099  | 1.138035 | AATF;ABCG1;ACO1;ACVR1B;AHI1;AKR1C3;ANP32A;APP;ARHGEF11;ARID1A;ARID3A;ARID3B;ARNT;ASCC2;AS         |
| brown | BP | GO:0002886 | T cell activation involved in immune res...  | 17735 | 47   | 1802 | 13  | 5.05   | 0.00102  | 2.574257 | BCL6;CD1C;CD86;IL23A;IL4R;JAK3;LCP1;LILRB1;MYB;PSEN1;SEMA4A;SLC11A1;STAT6                         |
| brown | CC | GO:0000123 | histone acetyltransferase complex            | 17735 | 74   | 1802 | 17  | 7.54   | 0.00102  | 2.254642 | ACTB;BRD8;BRPF3;CREBBP;EP300;ING4;KAT5;KAT6A;KAT7;POLE4;SAP130;SUPT3H;TADA2B;TAF4;UBAP2L;U        |
| brown | BP | GO:0001818 | negative regulation of cytokine producti...  | 17735 | 135  | 1802 | 27  | 14.49  | 0.00102  | 1.863354 | APOA1;BCL6;CIQTNF3;FOXP3;FURIN;GBA;HMOX1;IL23A;IL6R;JAK3;KAT5;KLF4;LILRB1;MEFV;NFKB1;NLRP12;U     |
| brown | MF | GO:0005099 | Ras GTPase activator activity                | 17735 | 112  | 1802 | 23  | 11.62  | 0.00103  | 1.979346 | ALDH1A1;ARAP1;ARAP3;ARHGAP1;ARHGAP26;ARHGAP27;C6orf170;DOCK2;GDI2;GMIP;PREX1;RALBP1;RAL           |
| brown | BP | GO:0070727 | cellular macromolecule localization          | 17735 | 960  | 1802 | 133 | 103.06 | 0.00104  | 1.29051  | ADAR;AHI1;AKR1C3;AP1M1;AP2A1;AP2M1;AP3B1;APC2;ARCN1;ARF6;ARFGAP3;ARL1;ARL6;BBS4;BCL6;BICD         |
| brown | BP | GO:0045912 | negative regulation of carbohydrate meta...  | 17735 | 26   | 1802 | 9   | 2.79   | 0.00106  | 3.225806 | CIQTNF3;FBP1;GCK;GRB10;GSK3A;HDAC4;PLEK;TGFB1;TINF2                                               |
| brown | BP | GO:0030593 | neutrophil chemotaxis                        | 17735 | 53   | 1802 | 14  | 5.69   | 0.00108  | 2.460457 | AMICA1;CSAR1;CAMK1D;CCL3;CSF3R;CXCR2;IL23A;ITGAM;ITGB2;MPP1;NOD2;PIK3CD;SYK;TIRAP                 |
| brown | BP | GO:0001816 | cytokine production                          | 17735 | 430  | 1802 | 67  | 46.16  | 0.00109  | 1.451473 | AGPAT1;APOA1;ARNT;BCL6;BTX;BTN3A1;CIQTNF3;C3;CCL3;CD14;CD86;CRTAM;BCF1R;FOXP3;FURIN;G6PD;         |
| brown | BP | GO:0006952 | defense response                             | 17735 | 1119 | 1802 | 152 | 120.13 | 0.00109  | 1.265296 | ADAR;AOAH;AP1M1;AP2A1;AP2M1;APOA1;APOBEC3C;APP;ARF1;B4GALT1;BCL6;BECN1;BNIP3;BTX;CIQTNF           |
| brown | MF | GO:0031683 | G-protein beta/gamma-subunit complex bin...  | 17735 | 22   | 1802 | 8   | 2.28   | 0.00111  | 3.508772 | GNAI1;GNAI2;GNAI5;GNAI2;GNAI3;GNAI4;GNAI5;GNAI6;GNAI7;PIK3R5                                      |
| brown | BP | GO:0010970 | microtubule-based transport                  | 17735 | 65   | 1802 | 16  | 6.98   | 0.00113  | 2.292264 | AP3B1;APP;ARHGAP21;BICD2;BLOC1S3;CDC42;IFT43;IFT46;KIF13A;KIF1B;MAP15;MAP2K1;NDEL1;PAFAH1B;       |
| brown | MF | GO:0016702 | oxidoreductase activity, acting on singl...  | 17735 | 80   | 1802 | 18  | 8.3    | 0.00118  | 2.168675 | ADO;ALKBH2;ALKBH3;ALOX15B;BCO2;FTO;HAAO;HGD;KDM2A;KDM3B;KDM4B;KDM5B;KDM6B;PHF2;PHF8;              |
| brown | BP | GO:0045935 | positive regulation of nucleobase-contai...  | 17735 | 1189 | 1802 | 160 | 127.64 | 0.00122  | 1.253526 | AATF;ACVR1B;AHI1;APP;ARHGEF10;ARHGEF11;ARID1A;ARID3A;ARNT;ASH2L;BCL9;BRCA1;BRD4;BRE;BTG2;C        |
| brown | BP | GO:0009893 | positive regulation of metabolic process     | 17735 | 2010 | 1802 | 256 | 215.78 | 0.00124  | 1.186394 | AATF;ABCG1;ACVR1B;ADAR;ADCY4;AGPAT1;AHI1;AKR1C3;ANAPC4;APITD1;APOA1;APP;ARHGEF10;ARHGEF11;AR      |
| brown | CC | GO:0015629 | actin cytoskeleton                           | 17735 | 366  | 1802 | 56  | 37.27  | 0.00127  | 1.502549 | ACTA1;ACTG1;AFAP1;APC2;BIN2;BRCA1;CAP1;CAPZB;CDC42EP4;CDH1;CFL1;CNN2;COPB2;CORO1C;CTDP1;C         |
| brown | BP | GO:0016482 | cytoplasmic transport                        | 17735 | 719  | 1802 | 103 | 77.19  | 0.00128  | 1.33437  | ADAR;AKR1C3;AP1M1;AP2A1;AP3B1;APC2;BCL6;BLOC1S3;C11orf73;CIQTNF3;CCL3;CDH1;DAB2;DAG1;DENI         |
| brown | BP | GO:0031062 | positive regulation of histone methylati...  | 17735 | 13   | 1802 | 6   | 1.4    | 0.00133  | 4.285714 | BRCA1;DNMT3B;JARID2;MYB;RTF1;WDR61                                                                |
| brown | MF | GO:0043167 | ion binding                                  | 17735 | 5761 | 1802 | 653 | 597.63 | 0.00135  | 1.092649 | AATK;ABAT;ABCC5;ABCC6;ABCG1;ACO1;ACOX1;ACSM1;ACSM3;ACSS2;ACTA1;ACTB;ACTG1;ACTN1;ACVR1B;           |
| brown | MF | GO:0016701 | oxidoreductase activity, acting on singl...  | 17735 | 81   | 1802 | 18  | 8.4    | 0.00137  | 2.142857 | ADO;ALKBH2;ALKBH3;ALOX15B;BCO2;FTO;HAAO;HGD;KDM2A;KDM3B;KDM4B;KDM5B;KDM6B;PHF2;PHF8;              |
| brown | MF | GO:0005070 | SH3/SH2 adaptor activity                     | 17735 | 50   | 1802 | 13  | 5.19   | 0.00138  | 2.504817 | ARHGAP1;CRKL;GAB2;GRB10;GRB2;LASP1;SH2D1A;SH2D3C;SH3BGR;SLA;SOC2;SRC;TP53BP2                      |
| brown | BP | GO:0080134 | regulation of response to stress             | 17735 | 737  | 1802 | 105 | 79.12  | 0.00139  | 1.327098 | AOAH;AP1M1;AP2A1;AP2M1;APOA1;ARF1;ATG7;BCL6;BECN1;BRCA1;BRE;BTX;CIQTNF3;C3;C4B1BP;CASP9;C         |
| brown | BP | GO:0031329 | regulation of cellular catabolic process     | 17735 | 450  | 1802 | 69  | 48.31  | 0.00143  | 1.428276 | ADAP2;ALDH1A1;ARAP1;ARAP3;ARFGAP3;ARHGAP26;ARHGAP27;ARHGEF10;ARNT;ATG7;BCL6;BECN1;BTG2            |
| brown | BP | GO:0031326 | regulation of cellular biosynthetic proc...  | 17735 | 3328 | 1802 | 405 | 357.27 | 0.00145  | 1.133596 | AATF;ABCG1;ACO1;ACVR1B;AHI1;AKR1C3;ANP32A;APP;ARHGEF11;ARID1A;ARID3A;ARID3B;ARNT;ASCC2;AS         |
| brown | MF | GO:0017124 | SH3 domain binding                           | 17735 | 115  | 1802 | 23  | 11.93  | 0.00149  | 1.927913 | ACPI;ADAM19;ARHGAP1;ARHGAP26;ARHGAP27;ARHGAP31;CASP9;CBL;DENND1A;ELMO1;ELMO2;GRB2;HC              |
| brown | BP | GO:0006027 | regulation of vesicle-mediated transport     | 17735 | 216  | 1802 | 38  | 23.19  | 0.00149  | 1.638637 | AHI1;ARF6;ATXN2;B4GALT1;C3;CAMK1D;CBL;CD14;CNN2;DAB2;DOCK2;GAB2;HCK;HIP1;HMOX1;HNRNP3K;LI         |
| brown | BP | GO:0006898 | receptor-mediated endocytosis                | 17735 | 132  | 1802 | 26  | 14.17  | 0.00158  | 1.834862 | ADRBK2;ADRBK3;ARF6;ARHGAP27;ATXN2;CAP1;CBL;CLTC;CLTCL1;CXCR2;DAB2;DNM2;GRB2;HFE;HIP1;HNRNP        |
| brown | MF | GO:0051213 | dioxygenase activity                         | 17735 | 82   | 1802 | 18  | 8.51   | 0.00159  | 2.115159 | ADO;ALKBH2;ALKBH3;ALOX15B;BCO2;FTO;HAAO;HGD;KDM2A;KDM3B;KDM4B;KDM5B;KDM6B;PHF2;PHF8;              |
| brown | BP | GO:0006464 | cellular protein modification process        | 17735 | 2482 | 1802 | 309 | 266.45 | 0.00159  | 1.159692 | AATK;ACVR1B;ADAR;ADCY4;ADHS;ADPRH;AGA;ALG14;ALGS;ANAPC16;ANAPCA4;APITD1;APLP2;APOA1;APP;          |
| brown | BP | GO:0036211 | protein modification process                 | 17735 | 2482 | 1802 | 309 | 266.45 | 0.00159  | 1.159692 | AATK;ACVR1B;ADAR;ADCY4;ADHS;ADPRH;AGA;ALG14;ALGS;ANAPC16;ANAPCA4;APITD1;APLP2;APOA1;APP;          |

|       |    |            |                                             |       |      |      |      |         |         |          |                                                                                              |
|-------|----|------------|---------------------------------------------|-------|------|------|------|---------|---------|----------|----------------------------------------------------------------------------------------------|
| brown | BP | GO:0051650 | establishment of vesicle localization       | 17735 | 55   | 1802 | 14   | 5.9     | 0.0016  | 2.372881 | ARCN1;ARF1;ARL6;BBS4;BLOC1S3;COPA;COPB2;MAP2K1;MYO7A;PSEN1;SEC16A;SEC31A;SNAP29;WIP1         |
| brown | CC | GO:0030132 | clathrin coat of coated pit                 | 17735 | 14   | 1802 | 6    | 1.43    | 0.00161 | 4.195804 | AP2A1;AP2M1;CLTA;CLTC;CLTC1L1;DAB2                                                           |
| brown | BP | GO:0002697 | regulation of immune effector process       | 17735 | 217  | 1802 | 38   | 23.3    | 0.00163 | 1.630901 | AP1M1;AP2A1;AP2M1;APOA1;ARF1;BCL6;BTK;C3;C4BPP;CD86;CRTAM;DOCK2;ELMO1;FOXP3;GAB2;HCK;HM      |
| brown | BP | GO:0045089 | positive regulation of innate immune res... | 17735 | 167  | 1802 | 31   | 17.93   | 0.00164 | 1.728946 | BTK;CD14;CD10;CD86;COLEC12;CRTAM;ELK1;HCK;IRAK2;KLR4-KLRK1;MAP2K1;MAP2K3;MAPK14;MYD88;N      |
| brown | BP | GO:0051056 | regulation of small GTPase mediated sign... | 17735 | 367  | 1802 | 58   | 39.4    | 0.00164 | 1.472081 | ADAP2;AKAP13;ALDH1A1;APOA1;ARAP1;ARAP3;ARF6;ARFGAP3;ARHGAP27;ARHGAP25;ARHGAP2                |
| brown | MF | GO:0016740 | transferase activity                        | 17735 | 1705 | 1802 | 213  | 176.87  | 0.00164 | 1.204274 | AATK;ABAT;ACVR1B;ADK;ADRBK2;AGPAT1;AKAP13;ALAS1;ALG1L2;ALH5;ALPK1;ALPK3;ASH2L;B3GNT9;B4G     |
| brown | BP | GO:0030217 | T cell differentiation                      | 17735 | 160  | 1802 | 30   | 17.18   | 0.00165 | 1.746217 | AP3B1;BCL6;CD10;CD3D;CD86;CTNNA1;DOCK2;EGFR1;FLT3;FOXP3;IKZF1;IL23A;IL4R;JAK3;LILRB2;MYB;NCO |
| brown | MF | GO:0003924 | GTPase activity                             | 17735 | 232  | 1802 | 39   | 24.07   | 0.00165 | 1.620274 | ARF1;ARF3;ARF6;ARL1;CDC42;DNM2;EHD1;EHD3;GNA11;GNA12;GNA15;GNAI2;GNAL;GNAS;GNAT2;GNB1;G      |
| brown | BP | GO:0046039 | GTP metabolic process                       | 17735 | 352  | 1802 | 56   | 37.79   | 0.00167 | 1.481874 | ADAP2;ALDH1A1;ARAP1;ARAP3;ARF1;ARF3;ARF6;ARFGAP3;ARHGAP26;ARHGAP27;ARHGFE10;ARL1;BCL6;C      |
| brown | BP | GO:1901068 | guanosine-containing compound metabolic ... | 17735 | 360  | 1802 | 57   | 38.65   | 0.00171 | 1.474774 | ADAP2;ALDH1A1;ARAP1;ARAP3;ARF1;ARF3;ARF6;ARFGAP3;ARHGAP26;ARHGAP27;ARHGFE10;ARL1;BCL6;C      |
| brown | BP | GO:1901136 | carbohydrate derivative catabolic proces... | 17735 | 564  | 1802 | 83   | 60.55   | 0.00171 | 1.370768 | ACIN1;ADAL;ADAP2;ALDH1A1;AMPD3;APOBEC3C;ARAP1;ARAP3;ARF1;ARF3;ARF6;ARFGAP3;ARHGAP26;ARI      |
| brown | BP | GO:0008152 | metabolic process                           | 17735 | 9452 | 1802 | 1067 | 1014.69 | 0.00171 | 1.051553 | AATF;AATK;ABAT;ABCC5;ABCG1;ABHD4;ACIN1;ACO1;ACOX1;ACSM1;ACSM3;ACSS2;ACTB;ACVR1B;ACYP1;A      |
| brown | BP | GO:0034613 | cellular protein localization               | 17735 | 956  | 1802 | 131  | 102.63  | 0.00173 | 1.27643  | ADAR;AH1;AKR1C3;AP1M1;AP2A1;AP2M1;AP3B1;APC2;ARCN1;ARF6;ARFGAP3;ARL1;ARL6;BBS4;BCL6;BICD     |
| brown | BP | GO:0042269 | regulation of natural killer cell mediat... | 17735 | 18   | 1802 | 7    | 1.93    | 0.00177 | 3.626943 | CRTAM;KLR4-KLRK1;LILRB1;PVR;SH2D1A;STAT5A;STAT5B                                             |
| brown | BP | GO:0002573 | myeloid leukocyte differentiation           | 17735 | 133  | 1802 | 26   | 14.28   | 0.00177 | 1.820728 | ACIN1;CBFA2T3;CCL3;CDC42;CITED2;CSF1;CSF1R;CTNNA1;GAB2;GNAS;HAX1;HCLS1;IKZF1;IL23A;LILRB1;M  |
| brown | BP | GO:0038127 | ERBB signaling pathway                      | 17735 | 161  | 1802 | 30   | 17.28   | 0.00182 | 1.736111 | ADCY4;AP2A1;AP2M1;APLP2;APP;CASP9;CBL;CDC42;CLTA;CLTC;EP515L1;GRB2;GSK3A;MAP2K1;PH           |
| brown | BP | GO:0030098 | lymphocyte differentiation                  | 17735 | 226  | 1802 | 39   | 24.26   | 0.00188 | 1.607585 | AP3B1;BCL6;BTK;CD1D;CD3D;CD86;CTNNA1;DOCK2;EGFR1;FLT3;FOXP3;GPR183;HDAC4;IKZF1;IL23A;IL4R;J  |
| brown | CC | GO:0005794 | Golgi apparatus                             | 17735 | 1158 | 1802 | 148  | 117.92  | 0.00188 | 1.255088 | AATF;ABCG1;ACO1;AP1M1;AP2A1;AP3B1;APC2;APP;ARAP1;ARCN1;ARF1;ARF3;ARF6;ARFGAP3;ARHGAP21;A     |
| brown | BP | GO:0002699 | positive regulation of immune effector p... | 17735 | 100  | 1802 | 21   | 10.74   | 0.0019  | 1.955307 | C3;CD86;CRTAM;FOXP3;GAB2;HMOX1;IL23A;IL4R;KLR4-KLRK1;LILRB1;MYB;NOD2;PVR;SH2D1A;STAT5A;ST    |
| brown | BP | GO:0006739 | NADP metabolic process                      | 17735 | 28   | 1802 | 9    | 3.01    | 0.00192 | 2.990033 | G6PD;GCK;GLYR1;HIBADH;NADK;PGAM1;PGD;TALDO1;TKT                                              |
| brown | BP | GO:0050690 | regulation of defense response to virus ... | 17735 | 28   | 1802 | 9    | 3.01    | 0.00192 | 2.990033 | AP1M1;AP2M1;ARF1;DOCK2;ELMO1;HCK;PACS1;RAC1                                                  |
| brown | BP | GO:0042058 | regulation of epidermal growth factor re... | 17735 | 62   | 1802 | 15   | 6.66    | 0.00192 | 2.252252 | AP2A1;AP2M1;APLP2;APP;CBL;CDC42;CLTA;CLTC;EP515L1;GRB2;PSEN1;PTPRJ;RAB7A;SH3BP1;SPRY2        |
| brown | BP | GO:0050663 | cytokine secretion                          | 17735 | 94   | 1802 | 20   | 10.09   | 0.00204 | 1.982161 | APOA1;BTN3A1;C1QTNF3;CCL3;CD14;CRTAM;CSF1R;FOXO3;GLMN;IL4R;LCP2;LILRB1;NLR4;NLRP12;NLRP3;    |
| brown | BP | GO:0002706 | regulation of lymphocyte mediated immuni... | 17735 | 75   | 1802 | 17   | 8.05    | 0.00212 | 2.111801 | BCL6;BTK;C3;CRTAM;FOXP3;IL23A;KLR4-KLRK1;LILRB1;NOD2;PVR;SH2D1A;STAT5A;STAT5B;STAT6;TAP2;T   |
| brown | BP | GO:0048522 | positive regulation of cellular process     | 17735 | 3140 | 1802 | 382  | 337.08  | 0.00213 | 1.133262 | AATF;ACIN1;ACVR1B;ADAMTSL4;ADAR;ADCY4;ADK;AGPAT1;AH1;AKR1C3;ALOX15B;ANAPC4;AP3B1;APITD1;     |
| brown | BP | GO:0006954 | inflammatory response                       | 17735 | 489  | 1802 | 73   | 52.49   | 0.00218 | 1.390741 | AOAH;APOA1;B4GALT1;BCL6;C1QTNF3;C3;C4BPP;CSAR1;CAMK1D;CCL3;CD14;CD163;CD44;CD97;CELA1;C      |
| brown | BP | GO:0007243 | intracellular protein kinase cascade        | 17735 | 879  | 1802 | 121  | 94.36   | 0.00218 | 1.282323 | AKR1C3;BRAP;BTK;C1QTNF3;CSAR1;CAMKK2;CANT1;CCL3;CD14;CD44;CD42;CFAR;CRKL;CSF1R;CTNNA1;D      |
| brown | BP | GO:0009306 | protein secretion                           | 17735 | 170  | 1802 | 31   | 18.25   | 0.0022  | 1.69863  | APOA1;ARFGAP3;BLOC1S3;BTN3A1;C1QTNF3;CCL3;CD14;CRTAM;CSF1R;FOXO3;GLMN;GNAS;IL4R;LCP2;LIL     |
| brown | BP | GO:0002768 | immune response-regulating cell surface ... | 17735 | 142  | 1802 | 27   | 15.24   | 0.00222 | 1.771654 | BTB;BTN3A1;CSAR1;CD3D;FOXO3;HLA-DPA1;KLR4-KLRK1;LAT2;LCP2;LILRB1;LILRB2;NFAM1;NFKB1;NFKBIA;  |
| brown | BP | GO:0006184 | GTP catabolic process                       | 17735 | 341  | 1802 | 54   | 36.61   | 0.00222 | 1.475007 | ADAP2;ALDH1A1;ARAP1;ARAP3;ARF1;ARF3;ARF6;ARFGAP3;ARHGAP26;ARHGAP27;ARHGFE10;ARL1;BCL6;C      |
| brown | BP | GO:0051254 | positive regulation of RNA metabolic pro... | 17735 | 1063 | 1802 | 143  | 114.11  | 0.00223 | 1.253173 | AP1M1;APP;ARHGFE11;ARID1A;ARID3A;ARNT;ASH2L;BCL9;BRCA1;BRD4;BTBD2;CALCOCC1;CAM               |
| brown | BP | GO:0002328 | pro-B cell differentiation                  | 17735 | 10   | 1802 | 5    | 1.07    | 0.00225 | 4.672897 | FLCN;FLT3;NOTCH1;PRKDC;SOX4                                                                  |
| brown | BP | GO:0051571 | positive regulation of histone H3-K4 met... | 17735 | 10   | 1802 | 5    | 1.07    | 0.00225 | 4.672897 | BRCA1;DNMT3B;MYB;RTF1;WDR61                                                                  |
| brown | BP | GO:0019538 | protein metabolic process                   | 17735 | 3895 | 1802 | 466  | 418.13  | 0.00225 | 1.114486 | AATF;AATK;ABCG1;ACO1;ACTB;ACVR1B;ADAM19;ADAR;ADCY4;ADHS;ADPRH;AGA;AGBL2;ALB;ALG14;ALG5;      |
| brown | BP | GO:0043112 | receptor metabolic process                  | 17735 | 108  | 1802 | 22   | 11.59   | 0.00226 | 1.898188 | ADRBK2;AH1;ATXN2;CAPN1;CLTC;CNPY2;CXCR2;DAB2;DNM2;ECE1;FURIN;GRB2;HNRNP;LILRB1;LMTK2;M       |
| brown | CC | GO:0043228 | non-membrane-bounded organelle              | 17735 | 3122 | 1802 | 362  | 317.92  | 0.00238 | 1.138651 | AATF;ACT1;ACTB;ACTG1;ACTN1;ADAR;AFAP1;AH1;ALDOC;ANXA1;APBB1IP;APC2;APITD1;APP;A              |
| brown | CC | GO:0043232 | intracellular non-membrane-bounded organ... | 17735 | 3122 | 1802 | 362  | 317.92  | 0.00238 | 1.138651 | AATF;ACT1;ACTB;ACTG1;ACTN1;ADAR;AFAP1;AH1;ALDOC;ANXA1;APBB1IP;APC2;APITD1;APP;A              |
| brown | BP | GO:0010604 | positive regulation of macromolecule met... | 17735 | 1869 | 1802 | 237  | 200.64  | 0.00241 | 1.18122  | AATF;ACVR1B;ADCY4;AH1;ANAPC4;APITD1;APP;ARHGFE11;ARID1A;ARID3A;ARNT;ASH2L;ATG7;ATP6V0D1;     |
| brown | BP | GO:0031668 | cellular response to extracellular stimu... | 17735 | 136  | 1802 | 26   | 14.6    | 0.00246 | 1.780822 | AKR1C3;ALB;ATG7;BECN1;CTSD;DAP;FBXO22;GCK;HFE;HMOX1;HSPA5;KIAA1324;LZT51;MAX;NBR1;NUAK2;I    |
| brown | BP | GO:0043470 | regulation of carbohydrate catabolic pro... | 17735 | 29   | 1802 | 9    | 3.11    | 0.00252 | 2.893891 | ARNT;FBP1;GAPDH5;GCK;GSK3A;HDAC4;INSR;NCO1;PGAM1                                             |
| brown | BP | GO:0043471 | regulation of cellular carbohydrate cata... | 17735 | 29   | 1802 | 9    | 3.11    | 0.00252 | 2.893891 | ARNT;FBP1;GAPDH5;GCK;GSK3A;HDAC4;INSR;NCO1;PGAM1                                             |
| brown | CC | GO:0044433 | cytoplasmic vesicle part                    | 17735 | 418  | 1802 | 61   | 42.57   | 0.00252 | 1.432934 | ACTN1;ALB;ANXA7;AP1M1;AP2A1;AP2M1;AP3B1;APP;ARCN1;ARHGAP21;ATP6V0A1;ATP6V0C;ATP6V0D1;B       |
| brown | BP | GO:1901069 | guanosine-containing compound catabolic ... | 17735 | 343  | 1802 | 54   | 36.82   | 0.00253 | 1.466594 | ADAP2;ALDH1A1;ARAP1;ARAP3;ARF1;ARF3;ARF6;ARFGAP3;ARHGAP26;ARHGAP27;ARHGFE10;ARL1;BCL6;C      |
| brown | BP | GO:0002715 | regulation of natural killer cell mediat... | 17735 | 19   | 1802 | 7    | 2.04    | 0.00255 | 3.431373 | CRTAM;KLR4-KLRK1;LILRB1;PVR;SH2D1A;STAT5A;STAT5B                                             |
| brown | BP | GO:0030705 | cytoskeleton-dependent intracellular tra... | 17735 | 70   | 1802 | 16   | 7.51    | 0.00258 | 2.130493 | AP3B1;APP;ARHGAP21;BICD2;BLOC1S3;CDC42;IFT43;IFT46;KIF13A;KIF1B;MAP15;MAP2K1;NDEL1;PAFAH2;A  |
| brown | BP | GO:0043170 | macromolecule metabolic process             | 17735 | 7334 | 1802 | 840  | 787.32  | 0.00258 | 1.066911 | AATF;AATK;ABCC5;ABCG1;ACIN1;ACO1;ACTB;ACVR1B;ADAM19;ADAR;ADCY4;ADHS;ADK;ADPRH;ADRBK2;AI      |
| brown | BP | GO:0060397 | JAK-STAT cascade involved in growth horm... | 17735 | 24   | 1802 | 8    | 2.58    | 0.00263 | 3.100775 | IRS2;JAK3;PTPN11;PTPN6;SOCS2;STAT3;STAT5A;STAT5B                                             |
| brown | BP | GO:0007165 | signal transduction                         | 17735 | 4165 | 1802 | 495  | 447.12  | 0.00267 | 1.107085 | AATF;ACVR1B;ADAP2;ADAR;ADCY4;ADRBK2;AGPAT1;AH1;AKAP13;ALDH1A1;ANKS1A;ANAPC3;ANP2A;ANP        |
| brown | CC | GO:0012506 | vesicle membrane                            | 17735 | 371  | 1802 | 55   | 37.78   | 0.00284 | 1.455797 | ANXA7;AP1M1;AP2A1;AP2M1;AP3B1;ARCN1;ARHGAP21;ATP6V0A1;ATP6V0C;ATP6V0D1;BSG;CACNG8;CAV        |
| brown | BP | GO:0045087 | innate immune response                      | 17735 | 550  | 1802 | 80   | 59.04   | 0.00284 | 1.355014 | ADAR;APP;BTK;C1RL;C3;C4BPP;CALCOCO2;CAMK2G;CCL3;CD14;CD1D;CD209;CD44;CD86;CLEC4C;COLEC12;    |
| brown | MF | GO:0050510 | Rho GTPase activator activity               | 17735 | 36   | 1802 | 10   | 3.73    | 0.00285 | 2.680965 | ARAP1;ARAP3;ARHGAP1;ARHGAP26;ARHGAP27;DOCK2;GMP13;RAB18;SRGAP2                               |
| brown | BP | GO:0030183 | B cell differentiation                      | 17735 | 77   | 1802 | 17   | 8.27    | 0.00285 | 2.055623 | BCL6;BTK;FLT3;GPR183;HDAC4;IKZF1;JAK3;MYB;NFAM1;NHEJ1;PLCG2;POU2F2;PRKDC;PTK2B;STAT5A;STA    |
| brown | BP | GO:0051648 | vesicle localization                        | 17735 | 77   | 1802 | 17   | 8.27    | 0.00285 | 2.055623 | ARCN1;ARF1;ARL6;BBS4;BLOC1S3;COPA;COPB2;KIF13A;MAP2K1;MYO7A;NDEL1;PAFAH1B1;PSEN1;SEC16A;     |
| brown | MF | GO:0011900 | kinase binding                              | 17735 | 397  | 1802 | 59   | 41.18   | 0.00289 | 1.432734 | ACTB;ATF7;CASP9;CNK1;CDC42;CTNNA1;DUSP12;FAMS8A;FOXO4;GRB2;GSK3A;GTF2I;HCLS1;HDAC4;IFNAR;    |
| brown | BP | GO:0042981 | regulation of apoptotic process             | 17735 | 1197 | 1802 | 158  | 128.5   | 0.0029  | 1.229572 | AATF;ACTN1;ACVR1B;ADAMTSL4;ADAR;AH1;AKR1C3;ALB;ALOX15B;AMIGO2;ANXA4;ANXA5;APP;ATF5;ATG       |
| brown | BP | GO:0009056 | catabolic process                           | 17735 | 1989 | 1802 | 250  | 213.52  | 0.00291 | 1.170851 | ABAT;ABHD4;ACIN1;ACO1;ADAL;ADAP2;ADHS;AKR1C3;ALDH1A1;ALDOC;AMPD3;ANAPC                       |
| brown | BP | GO:0002244 | hematopoietic progenitor cell differenti... | 17735 | 35   | 1802 | 10   | 3.76    | 0.00292 | 2.659574 | CITED2;FLCN;FLT3;NOTCH1;PLEK;PRKDC;PSEN1;SOX4;TGFBI                                          |
| brown | MF | GO:0016409 | palmitoyltransferase activity               | 17735 | 20   | 1802 | 7    | 2.07    | 0.00293 | 3.381643 | CPT1A;CPT2;SPTLC2;ZDHHC18;ZDHHC3;ZDHHC5;ZDHHC7                                               |
| brown | BP | GO:0050867 | positive regulation of cell activation      | 17735 | 239  | 1802 | 40   | 25.66   | 0.00293 | 1.558846 | ADK;AP3B1;BCL6;BLOC1S3;BTK;CD10;CD3D;CD86;CDC42;CHRN2B;FOXO3;GAB2;GPR183;GRB2;HLA-DPA1;I     |
| brown | BP | GO:0007173 | epidermal growth factor receptor signali... | 17735 | 159  | 1802 | 29   | 17.07   | 0.00298 | 1.698887 | ADCY4;AP2A1;AP2M1;APLP2;APP;CASP9;CBL;CDC42;CLTA;CLTC;EP515L1;FOXO4;GRB2;GSK3A;MAP2K1;P      |
| brown | CC | GO:0030666 | endocytic vesicle membrane                  | 17735 | 109  | 1802 | 21   | 11.1    | 0.00302 | 1.891892 | AP2A1;AP2M1;ATP6V0A1;ATP6V0C;ATP6V0D1;CACNG8;CAMK2G;CLTA;CLTC;HLA-B;HLA-C;HLA-DPA1;HLA-E     |
| brown | BP | GO:0002429 | immune response-activating cell surface ... | 17735 | 131  | 1802 | 25   | 14.06   | 0.00302 | 1.778094 | BTK;BTN3A1;CSAR1;CD3D;FOXO3;HLA-DPA1;KLR4-KLRK1;LAT2;LCP2;NFAM1;NFKB1;NFKBIA;PAK1;PIK3CD;I   |
| brown | CC | GO:0005769 | early endosome                              | 17735 | 190  | 1802 | 32   | 19.35   | 0.00302 | 1.653747 | ARF6;ATP6V0D1;CXCR7;ECE1;EHD1;EPHBI1;FAM21A;FAM21C;FIG4;FKBP15;HFE;HLA-B;HLA-C;HLA-E;HSD17   |
| brown | MF | GO:0005083 | small GTPase regulator activity             | 17735 | 295  | 1802 | 46   | 30.6    | 0.0032  | 1.503268 | ADAP2;AKAP13;ALDH1A1;ARAP1;ARAP3;ARFGAP3;ARHGAP26;ARHGAP27;ARHGAP26;ARHGAP27;ARHGFE10;A      |
| brown | MF | GO:0017166 | vinculin binding                            | 17735 | 11   | 1802 | 5    | 1.14    | 0.00323 | 4.385965 | ACTN1;CTNNA1;DAG1;PDXN;TLN1                                                                  |
| brown | CC | GO:0019897 | extrinsic to plasma membrane                | 17735 | 82   | 1802 | 17   | 8.35    | 0.0033  | 2.035928 | APC2;CHD1;CTNNA1;CTNNA1;GNA11;GNA12;GNA15;GNAI2;GNAL;GNAS;GNAT2;GNB1;GNB5;HCK;NUMB;R         |
| brown | MF | GO:0042802 | identical protein binding                   | 17735 | 852  | 1802 | 113  | 88.38   | 0.00339 | 1.27857  | ABAT;ABCG1;ACTG1;ADHS;ANXA9;APLP2;APOA1;APP;ARID3A;ATG7;ATP1F1;B4GALT1;BHLHE40;BINP3;BTK;C   |
| brown | CC | GO:0032991 | macromolecular complex                      | 17735 | 3893 | 1802 | 442  | 396.43  | 0.00347 | 1.114951 | ABAT;ACTA1;ACTB;ACTG1;ADAR;AH1;ALB;ANAPC16;ANAPC4;ANXA11;AP1M1;AP2A1;AP2M1;AP3B1;APC2;       |
| brown | CC | GO:0005884 | actin filament                              | 17735 | 50   | 1802 | 12   | 5.09    | 0.00368 | 2.357564 | ARL1;FKBP15;GAS7;HCK;LCP1;MYO1F;PAK1;RCSO1;TPM4                                              |



|       |    |            |                                             |       |      |      |     |        |         |          |                                                                                                                                                                                                                                                                                                                                                                                                                                                                                                                                                                                                                                                                                                                           |
|-------|----|------------|---------------------------------------------|-------|------|------|-----|--------|---------|----------|---------------------------------------------------------------------------------------------------------------------------------------------------------------------------------------------------------------------------------------------------------------------------------------------------------------------------------------------------------------------------------------------------------------------------------------------------------------------------------------------------------------------------------------------------------------------------------------------------------------------------------------------------------------------------------------------------------------------------|
| brown | CC | GO:0005776 | autophagic vacuole                          | 17735 | 38   | 1802 | 10  | 3.87   | 0.00383 | 2.583979 | DAPK2;NBR1;RAB23;SQSTM1;TBCL1D14;TM9SF1;TP53INP2;ULK1;WIPI1;WIPI2                                                                                                                                                                                                                                                                                                                                                                                                                                                                                                                                                                                                                                                         |
| brown | CC | GO:0030659 | cytoplasmic vesicle membrane                | 17735 | 360  | 1802 | 53  | 36.66  | 0.00387 | 1.445717 | ANXA7;AP1M1;AP2A1;AP2M1;AP3B1;ARCN1;ARHGAP21;ATP6V0A1;ATP6V0C;ATP6V0D1;BSG;CACNG8;CAV                                                                                                                                                                                                                                                                                                                                                                                                                                                                                                                                                                                                                                     |
| brown | CC | GO:0030670 | phagocytic vesicle membrane                 | 17735 | 51   | 1802 | 12  | 5.19   | 0.00438 | 2.312139 | ATP6V0A1;ATP6V0C;ATP6V0D1;HLA-B;HLA-C;HLA-E;RAB11FIP1;RAB23;RAB43;RAB7A;RAB8A;SLC11A1                                                                                                                                                                                                                                                                                                                                                                                                                                                                                                                                                                                                                                     |
| brown | MF | GO:0035258 | steroid hormone receptor binding            | 17735 | 63   | 1802 | 14  | 6.54   | 0.00449 | 2.140673 | BRCA1;CTNNB1;EP300;KAT5;NCOA6;NSD1;PHB2;PPID;PRKCB;RNF14;STAT3;STAT5B;WIPI1;YWHHA                                                                                                                                                                                                                                                                                                                                                                                                                                                                                                                                                                                                                                         |
| brown | CC | GO:0043234 | protein complex                             | 17735 | 3294 | 1802 | 377 | 335.44 | 0.00452 | 1.123897 | ABAT;ACT1;ACTB;ACTG1;AHI1;ALB;ANAPC16;ANAPC4;ANXA11;AP1M1;AP2A1;AP2M1;AP3B1;APC2;APITD:                                                                                                                                                                                                                                                                                                                                                                                                                                                                                                                                                                                                                                   |
| brown | CC | GO:0000139 | Golgi membrane                              | 17735 | 540  | 1802 | 74  | 54.99  | 0.00492 | 1.345699 | ABCG1;ARF1M1;AP2A1;APC2;ARAP1;ARCN1;ARF1;ARF3;ARFGAP3;ARHGAP21;ARL1;B3GNT9;B4GALT1;B4GAI                                                                                                                                                                                                                                                                                                                                                                                                                                                                                                                                                                                                                                  |
| brown | MF | GO:0005525 | GTP binding                                 | 17735 | 366  | 1802 | 54  | 37.97  | 0.00494 | 1.422175 | ACSM1;ARF1;ARF3;ARF6;ARL1;ARL6;CDC42;DNM2;EHD1;EHD3;GIMAP4;GIMAP8;GNA11;GNA12;GNA15;GN                                                                                                                                                                                                                                                                                                                                                                                                                                                                                                                                                                                                                                    |
| brown | CC | GO:0000313 | organelle ribosome                          | 17735 | 52   | 1802 | 12  | 5.3    | 0.00518 | 2.264151 | DAP3;MRP63;MRPL11;MRPL27;MRPL34;MRPL35;MRPL36;MRPL43;MRPL51;MRPS14;MRPS21;MRPS3:                                                                                                                                                                                                                                                                                                                                                                                                                                                                                                                                                                                                                                          |
| brown | CC | GO:0005761 | mitochondrial ribosome                      | 17735 | 52   | 1802 | 12  | 5.3    | 0.00518 | 2.264151 | DAP3;MRP63;MRPL11;MRPL27;MRPL34;MRPL35;MRPL36;MRPL43;MRPL51;MRPS14;MRPS21;MRPS3:                                                                                                                                                                                                                                                                                                                                                                                                                                                                                                                                                                                                                                          |
| brown | MF | GO:0003779 | actin binding                               | 17735 | 351  | 1802 | 52  | 36.41  | 0.00528 | 1.428179 | ACTN1;AFAP1;CAP1;CAP2B;CFL1;CFL2;CNN2;CORO1C;COTL1;CTNNA1;CYFIP1;DAG1;DBNL1;EPB41;EPB41L3;E                                                                                                                                                                                                                                                                                                                                                                                                                                                                                                                                                                                                                               |
| brown | MF | GO:0032403 | protein complex binding                     | 17735 | 327  | 1802 | 49  | 33.92  | 0.00533 | 1.444575 | ACTN1;ACVR1B;ATP6V0D1;CTNNB1;DAB2;DOCK2;DOK3;FCAR;FKBP1A;FLCN;FRS3;GNA11;GNA12;GNA15;G                                                                                                                                                                                                                                                                                                                                                                                                                                                                                                                                                                                                                                    |
| brown | MF | GO:0005048 | signal sequence binding                     | 17735 | 22   | 1802 | 7   | 2.28   | 0.00535 | 3.070175 | BRAP;BRE;KDEL1;KPNB1;NFKBIA;PEX7;SRP54                                                                                                                                                                                                                                                                                                                                                                                                                                                                                                                                                                                                                                                                                    |
| brown | MF | GO:0032451 | demethylase activity                        | 17735 | 22   | 1802 | 7   | 2.28   | 0.00535 | 3.070175 | ALKBH2;ALKBH3;FTO;KDM2A;KDM5B;PHF2;PHF8                                                                                                                                                                                                                                                                                                                                                                                                                                                                                                                                                                                                                                                                                   |
| brown | CC | GO:0044429 | mitochondrial part                          | 17735 | 740  | 1802 | 97  | 75.36  | 0.00538 | 1.287155 | ABAT;ACSM1;ACSM3;ADAP2;ALAS1;ALDH2;ATP55;ATPIF1;BCKDHA;BCL2L13;BNIP3;C19orf12;CHCHD6;CHCH                                                                                                                                                                                                                                                                                                                                                                                                                                                                                                                                                                                                                                 |
| brown | MF | GO:0017016 | Ras GTPase binding                          | 17735 | 120  | 1802 | 22  | 12.45  | 0.00567 | 1.767068 | BICD2;CDC42EP4;CYFIP1;DENND5A;ERC1;GOLGA5;MAP2K1;NCF2;NDRG1;NXT1;RAB11FIP4;RAB7A;RAB8A;R                                                                                                                                                                                                                                                                                                                                                                                                                                                                                                                                                                                                                                  |
| brown | CC | GO:0008180 | signalosome                                 | 17735 | 34   | 1802 | 9   | 3.46   | 0.00573 | 2.601156 | BASP1;COP57A;COPS8;DYNLL1;GRB2;HSPA1B;HSPA5;MYH9;NOD2                                                                                                                                                                                                                                                                                                                                                                                                                                                                                                                                                                                                                                                                     |
| brown | MF | GO:0008092 | cytoskeletal protein binding                | 17735 | 627  | 1802 | 85  | 65.04  | 0.00586 | 1.306888 | AATF;ACT1;ACTB;ACTN1;AFAP1;ALDOC;APC2;ARHGAP26;ARHGFE10;B4GALT1;BBS4;BRCA1;CAP1;CAPZB;C                                                                                                                                                                                                                                                                                                                                                                                                                                                                                                                                                                                                                                   |
| brown | CC | GO:0005774 | vacuolar membrane                           | 17735 | 183  | 1802 | 30  | 18.64  | 0.00594 | 1.609442 | AP1M1;AP2M1;ATP6V0A1;ATP6V0C;ATP6V0D1;CD1D;CD68;GBA;HGSNAT;HLA-DPA1;IGF2R;LAMP1;LAPTM5                                                                                                                                                                                                                                                                                                                                                                                                                                                                                                                                                                                                                                    |
| brown | CC | GO:0030117 | membrane coat                               | 17735 | 73   | 1802 | 15  | 7.43   | 0.00609 | 2.018843 | AP1M1;AP2M1;AP3B1;ARCN1;ARL6;CLTA;CLTC;CLTCL1;COPA;COPB2;COPZ2;DAB2;SEC23B;SEC31A                                                                                                                                                                                                                                                                                                                                                                                                                                                                                                                                                                                                                                         |
| brown | CC | GO:0048475 | coated membrane                             | 17735 | 73   | 1802 | 15  | 7.43   | 0.00609 | 2.018843 | AP1M1;AP2A1;AP2M1;AP3B1;ARCN1;ARL6;CLTA;CLTC;CLTCL1;COPA;COPB2;COPZ2;DAB2;SEC23B;SEC31A                                                                                                                                                                                                                                                                                                                                                                                                                                                                                                                                                                                                                                   |
| brown | MF | GO:0017137 | Rab GTPase binding                          | 17735 | 46   | 1802 | 11  | 4.77   | 0.0063  | 2.30608  | BICD2;DENND5A;ERC1;GOLGA5;NDRG1;RAB11FIP4;RAB8A;RAC1;RIN3;RPH3A;ULK1                                                                                                                                                                                                                                                                                                                                                                                                                                                                                                                                                                                                                                                      |
| brown | CC | GO:0030120 | vesicle coat                                | 17735 | 41   | 1802 | 10  | 4.18   | 0.00686 | 2.392344 | AP2A1;ARCN1;CLTA;CLTC;CLTCL1;COPA;COPB2;COPZ2;SEC23B;SEC31A                                                                                                                                                                                                                                                                                                                                                                                                                                                                                                                                                                                                                                                               |
| brown | CC | GO:0005765 | lysosomal membrane                          | 17735 | 139  | 1802 | 24  | 14.15  | 0.00687 | 1.696113 | AP1M1;AP2M1;CD1D;CD68;GBA;HGSNAT;HLA-DPA1;IGF2R;LAMP1;LAPTM5;MARCHE8;MYO7A;NCSTN;NEU1                                                                                                                                                                                                                                                                                                                                                                                                                                                                                                                                                                                                                                     |
| brown | CC | GO:0030176 | integral to endoplasmic reticulum membra... | 17735 | 95   | 1802 | 18  | 9.67   | 0.00689 | 1.861427 | BSC1;DPAG1;ELOVL1;HLA-B;HLA-C;HLA-DPA1;HLA-E;HMI13;HSPA5;RRBP1;RTN1;RTN4;SGPL1;SLC27A5;SP                                                                                                                                                                                                                                                                                                                                                                                                                                                                                                                                                                                                                                 |
| brown | MF | GO:0035591 | signaling adaptor activity                  | 17735 | 66   | 1802 | 14  | 6.85   | 0.00694 | 2.043796 | ARHGAP1;CRKL;GAB2;GRB10;GRB2;LASP1;SH2D1A;SH2D3;SH3BGR;SLA;SOC2;SRC;TP53BP2;TRAF1                                                                                                                                                                                                                                                                                                                                                                                                                                                                                                                                                                                                                                         |
| brown | CC | GO:0045121 | membrane raft                               | 17735 | 178  | 1802 | 29  | 18.13  | 0.00736 | 1.599559 | ARID3A;BSG;BTX;CBL;CD14;DAG1;EPHB1;FLOT2;FURIN;GNAI3;HMOX1;IGF1R;INSR;KCNAS;LAT2;M                                                                                                                                                                                                                                                                                                                                                                                                                                                                                                                                                                                                                                        |
| brown | MF | GO:0008565 | protein transporter activity                | 17735 | 87   | 1802 | 17  | 9.03   | 0.00742 | 1.882614 | ABCG1;AP2A1;ARFGAP3;C11orf73;COX18;KPNB1;LRP1;MRPL45;NUP125;RAMP1;RUFY1;SEC61G;SNX1;TOMV                                                                                                                                                                                                                                                                                                                                                                                                                                                                                                                                                                                                                                  |
| brown | MF | GO:0051020 | GTPase binding                              | 17735 | 145  | 1802 | 25  | 15.04  | 0.00752 | 1.662234 | BICD2;BNIP3;CDC42EP4;CYFIP1;DENND5A;ERC1;GNB1;GOLGA5;MAP2K1;NCF2;NDRG1;NXT1;RAB11FIP4;RA                                                                                                                                                                                                                                                                                                                                                                                                                                                                                                                                                                                                                                  |
| brown | MF | GO:0030675 | Rac GTPase activator activity               | 17735 | 13   | 1802 | 5   | 1.35   | 0.00753 | 3.703704 | ARHGAP27;DOCK2;RALBP1;SRGAP2                                                                                                                                                                                                                                                                                                                                                                                                                                                                                                                                                                                                                                                                                              |
| brown | MF | GO:0043325 | phosphatidylinositol-3,4-bisphosphate bi... | 17735 | 13   | 1802 | 5   | 1.35   | 0.00753 | 3.703704 | ADAP2;ARAP3;GAB2;PLEK;ZFYVE1                                                                                                                                                                                                                                                                                                                                                                                                                                                                                                                                                                                                                                                                                              |
| brown | MF | GO:0043560 | insulin receptor substrate binding          | 17735 | 13   | 1802 | 5   | 1.35   | 0.00753 | 3.703704 | GRB2;IGF1R;IL4R;INSR;PRKCD                                                                                                                                                                                                                                                                                                                                                                                                                                                                                                                                                                                                                                                                                                |
| brown | MF | GO:0046965 | retinoid X receptor binding                 | 17735 | 13   | 1802 | 5   | 1.35   | 0.00753 | 3.703704 | MED25;NCOA6;NCOR1;NSD1;VDR                                                                                                                                                                                                                                                                                                                                                                                                                                                                                                                                                                                                                                                                                                |
| brown | MF | GO:0048029 | monosaccharide binding                      | 17735 | 60   | 1802 | 13  | 6.22   | 0.00758 | 2.090032 | ALKBH3;BSG;CD209;COLEC12;FBP1;G6PD;GCK;HK2;IGF2R;MANBA;PHYH;PLOC1;PYGL                                                                                                                                                                                                                                                                                                                                                                                                                                                                                                                                                                                                                                                    |
| brown | MF | GO:0005544 | calcium-dependent phospholipid binding      | 17735 | 29   | 1802 | 8   | 3.01   | 0.00772 | 2.657807 | ANXA11;ANXA4;ANXA5;ANXA7;ANXA9;DYSF;RPH3A;SYT2                                                                                                                                                                                                                                                                                                                                                                                                                                                                                                                                                                                                                                                                            |
| brown | CC | GO:0042995 | cell projection                             | 17735 | 1194 | 1802 | 147 | 121.59 | 0.00774 | 1.208981 | ABAT;ACP1;ACTB;ACTN1;ADCY4;AHI1;ALDOC;ANKS1A;APBB1P;APC2;APP;ARAP3;ARF6;ARHGAP1;ARHGAP2                                                                                                                                                                                                                                                                                                                                                                                                                                                                                                                                                                                                                                   |
| brown | CC | GO:0031975 | envelope                                    | 17735 | 839  | 1802 | 107 | 85.44  | 0.00813 | 1.252341 | ADAP2;ANXA11;ANXA7;ATP55;ATPIF1;BCL2L13;BNIP3;C19orf12;CERS2;CHCHD6;CHCK7;CLP;COX11;COX1                                                                                                                                                                                                                                                                                                                                                                                                                                                                                                                                                                                                                                  |
| brown | MF | GO:0003713 | transcription coactivator activity          | 17735 | 270  | 1802 | 41  | 28.01  | 0.00815 | 1.463763 | ARID1A;ARNT;BRCA1;CALCOCO1;CARM1;CD3D;CITED2;CREBBP;CTNNB1;EP300;GMEB1;GTF2F1;HIPK2;ING4                                                                                                                                                                                                                                                                                                                                                                                                                                                                                                                                                                                                                                  |
| brown | CC | GO:0030140 | trans-Golgi network transport vesicle       | 17735 | 24   | 1802 | 7   | 2.44   | 0.00818 | 2.868852 | AP2A1;CLTA;CLTC;CLTCL1;FURIN;IGF2R;SPG21                                                                                                                                                                                                                                                                                                                                                                                                                                                                                                                                                                                                                                                                                  |
| brown | CC | GO:0005905 | coated pit                                  | 17735 | 55   | 1802 | 12  | 5.6    | 0.00828 | 2.142857 | AP2A1;AP2M1;APP;CLTA;CLTC;CLTCL1;DAB2;EPS15L1;ITSN1;LRP1;LRP10;RAB35                                                                                                                                                                                                                                                                                                                                                                                                                                                                                                                                                                                                                                                      |
| brown | CC | GO:0030863 | cortical cytoskeleton                       | 17735 | 55   | 1802 | 12  | 5.6    | 0.00828 | 2.142857 | ACTB;CAP1;CAPZB;CFL1;EPB41;LASP1;MAPRE1;MPP1;MYH9;MYO1F;SPTB;TPM4                                                                                                                                                                                                                                                                                                                                                                                                                                                                                                                                                                                                                                                         |
| brown | MF | GO:0003682 | chromatin binding                           | 17735 | 327  | 1802 | 48  | 33.92  | 0.00847 | 1.415094 | AP1M1;ARF1;ARF3;ARF6;ARL1;ARL6;CDC42;DNM2;EHD1;EHD3;GIMAP4;GIMAP8;GNA11;GNA12;GNA15;GN                                                                                                                                                                                                                                                                                                                                                                                                                                                                                                                                                                                                                                    |
| brown | CC | GO:0005834 | heterotrimeric G-protein complex            | 17735 | 36   | 1802 | 9   | 3.67   | 0.00855 | 2.452316 | GNA11;GNA12;GNA15;GNAI2;GNAI4;GNAI5;GNAI6;GNAI7;GNAI8;GNAI9;GNAI10;GNAI11;GNAI12;GNAI13;GNAI14;GNAI15;GNAI16;GNAI17;GNAI18;GNAI19;GNAI20;GNAI21;GNAI22;GNAI23;GNAI24;GNAI25;GNAI26;GNAI27;GNAI28;GNAI29;GNAI30;GNAI31;GNAI32;GNAI33;GNAI34;GNAI35;GNAI36;GNAI37;GNAI38;GNAI39;GNAI40;GNAI41;GNAI42;GNAI43;GNAI44;GNAI45;GNAI46;GNAI47;GNAI48;GNAI49;GNAI50;GNAI51;GNAI52;GNAI53;GNAI54;GNAI55;GNAI56;GNAI57;GNAI58;GNAI59;GNAI60;GNAI61;GNAI62;GNAI63;GNAI64;GNAI65;GNAI66;GNAI67;GNAI68;GNAI69;GNAI70;GNAI71;GNAI72;GNAI73;GNAI74;GNAI75;GNAI76;GNAI77;GNAI78;GNAI79;GNAI80;GNAI81;GNAI82;GNAI83;GNAI84;GNAI85;GNAI86;GNAI87;GNAI88;GNAI89;GNAI90;GNAI91;GNAI92;GNAI93;GNAI94;GNAI95;GNAI96;GNAI97;GNAI98;GNAI99;GNAI100 |
| brown | CC | GO:0044451 | nucleoplasm part                            | 17735 | 823  | 1802 | 105 | 83.81  | 0.00859 | 1.252834 | ACIN1;ACTB;AFF2;APITD1;ARNT;ASH2L;ATF5;BASP1;BRD8;BRPF3;CAC3;CBY1;CDC5L;CHD8;CPSF7;CREBBP;C                                                                                                                                                                                                                                                                                                                                                                                                                                                                                                                                                                                                                               |
| brown | CC | GO:0005798 | Golgi-associated vesicle                    | 17735 | 62   | 1802 | 13  | 6.31   | 0.00865 | 2.060222 | AP2A1;ARCN1;CLTA;CLTC;CLTCL1;COPA;COPB2;COPZ2;FURIN;IGF2R;PASC3;PASC5;SPG21;SPPL3                                                                                                                                                                                                                                                                                                                                                                                                                                                                                                                                                                                                                                         |
| brown | MF | GO:0031490 | chromatin DNA binding                       | 17735 | 30   | 1802 | 8   | 3.11   | 0.00959 | 2.572347 | BCL6;EP300;HMGN3;HMGN4;NOTCH1;RCC1;RXRA;SRF                                                                                                                                                                                                                                                                                                                                                                                                                                                                                                                                                                                                                                                                               |
| brown | CC | GO:0005913 | cell-cell adherens junction                 | 17735 | 43   | 1802 | 10  | 4.38   | 0.00974 | 2.283105 | ACTN1;CDH1;CTNNA1;CTNNB1;CTNND1;MYH9;NDRG1;PVRL1;VCL;ZYX                                                                                                                                                                                                                                                                                                                                                                                                                                                                                                                                                                                                                                                                  |
| brown | MF | GO:0032393 | MHC class I receptor activity               | 17735 | 19   | 1802 | 6   | 1.97   | 0.0102  | 3.045685 | HLA-B;HLA-C;HLA-E;KIR3DL1;LILRB1;LILRB2                                                                                                                                                                                                                                                                                                                                                                                                                                                                                                                                                                                                                                                                                   |
| brown | CC | GO:0030660 | Golgi-associated vesicle membrane           | 17735 | 37   | 1802 | 9   | 3.77   | 0.0103  | 2.387268 | AP2A1;ARCN1;CLTA;CLTC;CLTCL1;COPA;COPB2;COPZ2;SPPL3                                                                                                                                                                                                                                                                                                                                                                                                                                                                                                                                                                                                                                                                       |
| brown | MF | GO:0019001 | guanyl nucleotide binding                   | 17735 | 380  | 1802 | 54  | 39.42  | 0.01039 | 1.369863 | ACSM1;ARF1;ARF3;ARF6;ARL1;ARL6;CDC42;DNM2;EHD1;EHD3;GIMAP4;GIMAP8;GNA11;GNA12;GNA15;GN                                                                                                                                                                                                                                                                                                                                                                                                                                                                                                                                                                                                                                    |
| brown | MF | GO:0032561 | guanyl ribonucleotide binding               | 17735 | 380  | 1802 | 54  | 39.42  | 0.01039 | 1.369863 | ACSM1;ARF1;ARF3;ARF6;ARL1;ARL6;CDC42;DNM2;EHD1;EHD3;GIMAP4;GIMAP8;GNA11;GNA12;GNA15;GN                                                                                                                                                                                                                                                                                                                                                                                                                                                                                                                                                                                                                                    |
| brown | MF | GO:0042288 | MHC class I protein binding                 | 17735 | 14   | 1802 | 5   | 1.45   | 0.01072 | 3.448276 | KLRK4-KLRK1;LILRB1;LILRB2;TAP2;TAPBP                                                                                                                                                                                                                                                                                                                                                                                                                                                                                                                                                                                                                                                                                      |
| brown | CC | GO:0055037 | recycling endosome                          | 17735 | 71   | 1802 | 14  | 7.23   | 0.01139 | 1.936376 | ABCG1;ARF6;CXCR7;EHD1;EHD3;HFE;LMTK2;NDRG1;PLEKH2;RAB11FIP1;RAB11FIP4;RAB8A;SCAMP2;VMI                                                                                                                                                                                                                                                                                                                                                                                                                                                                                                                                                                                                                                    |
| brown | MF | GO:0035091 | phosphatidylinositol binding                | 17735 | 150  | 1802 | 25  | 15.56  | 0.01148 | 1.606684 | ADAP2;ARAP1;ARAP3;BTX;DAB2;EPB41;GAB2;HIP1;PHF12;PITPNA;PLEK;RAB35;SH3PX2B;SH3YL1;SNX1;SNX1                                                                                                                                                                                                                                                                                                                                                                                                                                                                                                                                                                                                                               |
| brown | CC | GO:0030662 | coated vesicle membrane                     | 17735 | 145  | 1802 | 24  | 14.77  | 0.0115  | 1.624915 | AP1M1;AP2A1;AP2M1;AP3B1;ARCN1;CLTA;CLTC;CLTCL1;COPA;COPB2;COPZ2;DAB2;DENND1A;DNAJC5;HIP:                                                                                                                                                                                                                                                                                                                                                                                                                                                                                                                                                                                                                                  |
| brown | MF | GO:0042169 | SH2 domain binding                          | 17735 | 31   | 1802 | 8   | 3.22   | 0.01177 | 2.484472 | DAG1;INSR;KHDRBS2;LAT2;LILRB1;SH3PX2B;SQSTM1;SRC                                                                                                                                                                                                                                                                                                                                                                                                                                                                                                                                                                                                                                                                          |
| brown | MF | GO:0042277 | peptide binding                             | 17735 | 143  | 1802 | 24  | 14.83  | 0.01204 | 1.618341 | APOA1;BRAP;BRE;CD1C;CD209;CLTA;ECE1;FURIN;IGF1R;INSR;KDEL1;KPNB1;LILRB1;LILRB2;MAM1;NFKBIA;NO                                                                                                                                                                                                                                                                                                                                                                                                                                                                                                                                                                                                                             |
| brown | MF | GO:0035257 | nuclear hormone receptor binding            | 17735 | 128  | 1802 | 22  | 13.28  | 0.01208 | 1.656627 | BRCA1;CTNNB1;EP300;HMGN3;KAT5;MED12;MED25;NCOA6;NCOR1;NSD1;PHB2;PPID;PRKCB;RNF14;RXRA;                                                                                                                                                                                                                                                                                                                                                                                                                                                                                                                                                                                                                                    |
| brown | CC | GO:0031253 | cell projection membrane                    | 17735 | 177  | 1802 | 28  | 18.02  | 0.0123  | 1.553829 | APC2;ARF6;ARL6;B4GALT1;BBS4;CFL1;CTNNB1;EMR2;EPB41L3;EVC;FZD1;GNA12;ITGA5;KCNK3;LCP1;MAPRE                                                                                                                                                                                                                                                                                                                                                                                                                                                                                                                                                                                                                                |
| brown | MF | GO:0042803 | protein homodimerization activity           | 17735 | 545  | 1802 | 73  | 56.54  | 0.01325 | 1.291121 | ABAT;ABCG1;ADH5;ANXA9;ARID3A;ATG7;ATPIF1;B4GALT1;BHLHE40;BNIP3;CALCOCO2;CARM1;CD3D;CITED2;CREBBP;CTNNB1;DNM1                                                                                                                                                                                                                                                                                                                                                                                                                                                                                                                                                                                                              |
| brown | MF | GO:0005407 | phosphatidylinositol-3,4,5-trisphosphate... | 17735 | 20   | 1802 | 6   | 2.07   | 0.01331 | 2.898551 | ADAP2;ARAP1;ARAP3;BTX;GAB2;ZFYVE1                                                                                                                                                                                                                                                                                                                                                                                                                                                                                                                                                                                                                                                                                         |
| brown | CC | GO:0000407 | pre-autophagosomal structure                | 17735 | 15   | 1802 | 5   | 1.53   | 0.01366 | 3.267974 | NBR1;SQSTM1;ULK1;WIPI1;WIPI2                                                                                                                                                                                                                                                                                                                                                                                                                                                                                                                                                                                                                                                                                              |
| brown | CC | GO:0031306 | intrinsic to mitochondrial outer membran... | 17735 | 15   | 1802 | 5   | 1.53   | 0.01366 | 3.267974 | BNIP3;CPT1A;FIS1;FUNDC1;MFN2                                                                                                                                                                                                                                                                                                                                                                                                                                                                                                                                                                                                                                                                                              |
| brown | MF | GO:0004713 | protein tyrosine kinase activity            | 17735 | 145  | 1802 | 24  | 15.04  | 0.01417 | 1.595745 | AATK;BTX;CAMKK2;CSF1R;DYRK4;EPHB1;EPHB2;FLT3;HCK;IGF1R;IGF2R;INSR;JAK1;JAK2;LMTK2;MAP2K1;MA                                                                                                                                                                                                                                                                                                                                                                                                                                                                                                                                                                                                                               |
| brown | MF | GO:0030674 | protein binding, bridging                   | 17735 | 130  | 1802 | 22  | 13.49  | 0.01436 | 1.630838 | ADAP2;ARHGAP1;ARHGAP26;COL8A2;CRKL;CUX1;DAB2;FSCN1;GAB2;GRB10;GRB2;HSPA5;LASP1;SH2D1A;SI                                                                                                                                                                                                                                                                                                                                                                                                                                                                                                                                                                                                                                  |
| brown | CC | GO:0032587 | ruffle membrane                             | 17735 | 59   | 1802 | 12  | 6.01   | 0.01448 | 1.996672 | CFL1;EMR2;ITGA5;LCP1;PLEK;PTPRJ;RAC1;RHOA;SH3YL1;SPRY2;TIRAP;TLN1                                                                                                                                                                                                                                                                                                                                                                                                                                                                                                                                                                                                                                                         |
| brown | MF | GO:0004029 | aldehyde dehydrogenase (NAD) activity       | 17735 | 10   | 1802 | 4   | 1.04   | 0.0145  | 3.846154 | ADH5;ALDH1A1;ALDH2;ALDH9A1                                                                                                                                                                                                                                                                                                                                                                                                                                                                                                                                                                                                                                                                                                |
| brown | CC | GO:004     |                                             |       |      |      |     |        |         |          |                                                                                                                                                                                                                                                                                                                                                                                                                                                                                                                                                                                                                                                                                                                           |

|       |    |            |                                             |       |      |      |     |        |         |          |                                                                                                      |
|-------|----|------------|---------------------------------------------|-------|------|------|-----|--------|---------|----------|------------------------------------------------------------------------------------------------------|
| brown | CC | GO:0031967 | organelle envelope                          | 17735 | 825  | 1802 | 103 | 84.01  | 0.01639 | 1.226045 | ADAP2;ANXA11;ANXA7;ATP55;ATPIF1;BCL2L13;BNIP3;C19orf12;CERS2;CHCHD6;CHCHD7;CLPX;COX11;COX1           |
| brown | MF | GO:0032118 | amide binding                               | 17735 | 147  | 1802 | 24  | 15.25  | 0.01659 | 1.57377  | APOA1;BRAP;BRE;CD1C;CD209;CLTA;ECE1;FURIN;IGF1R;INSR;KDEL1R;KPNB1;LDLRAD3;MAM1L;NFKBIA;NOI           |
| brown | MF | GO:0001085 | RNA polymerase II transcription factor b... | 17735 | 73   | 1802 | 14  | 7.57   | 0.01675 | 1.849406 | BHLHE40;CITED2;CREBBP;CTNNB1;EP300;HCL1;HIPK2;KLF4;NCOR1;RBPJ;SIN3A;SPEN;STAT3;WWP2                  |
| brown | CC | GO:0030133 | transport vesicle                           | 17735 | 142  | 1802 | 23  | 14.46  | 0.0168  | 1.590595 | AP2A1;BLOC1L3;CHGA;CLTA;CLTC;CLTCL1;CRISPLD2;FURIN;GNAS;HCK;HLA-B;HLA-C;HLA-DPA1;HLA-E;IGF2R         |
| brown | CC | GO:0019898 | extrinsic to membrane                       | 17735 | 127  | 1802 | 21  | 12.93  | 0.01746 | 1.62413  | APC2;CDH1;CTNNA1;CTNNB1;EPB41;EPB41L3;GNA11;GNA12;GNA15;GNAI2;GNAL;GNAS;GNAT2;GNB1;GNE               |
| brown | MF | GO:0046966 | thyroid hormone receptor binding            | 17735 | 27   | 1802 | 7   | 2.8    | 0.0176  | 2.5      | HMGNS3;MED12;NCOA6;NCOR1;NSD1;TAF11;THRAP3                                                           |
| brown | CC | GO:0031227 | intrinsic to endoplasmic reticulum membr... | 17735 | 112  | 1802 | 19  | 11.41  | 0.0179  | 1.665206 | BSC1L2;DPAGT1;ELOVL1;EXTL3;HLA-B;HLA-C;HLA-DPA1;HLA-E;HM13;HSPA5;RRBP1;RTN1;RTN4;SGPL1;SLC27         |
| brown | MF | GO:0051427 | hormone receptor binding                    | 17735 | 148  | 1802 | 24  | 15.35  | 0.01792 | 1.563518 | BRCA1;CTNNB1;EP300;HMGNS3;JAK1;KATS5;MED12;MED25;NCOA6;NCOR1;NSD1;PHB2;PPID;PRKCB;RNF14;F            |
| brown | CC | GO:0035869 | ciliary transition zone                     | 17735 | 16   | 1802 | 5   | 1.63   | 0.01824 | 3.067485 | AH1;CC2D2A;TCTN1;TMEM237;TMEM67                                                                      |
| brown | MF | GO:0031267 | small GTPase binding                        | 17735 | 133  | 1802 | 22  | 13.8   | 0.0184  | 1.594203 | BICD2;CDC42EP4;CYFIP1;DENND5A;ERC1;GOLGA5;MAP2K1;NCF2;NDRG1;NXT1;RAB11FIP4;RAB7A;RAB8A;R             |
| brown | CC | GO:0005740 | mitochondrial envelope                      | 17735 | 520  | 1802 | 68  | 52.95  | 0.01854 | 1.28423  | ADAP2;ATP55;ATPIF1;BCL2L13;BNIP3;C19orf12;CHCHD6;CHCHD7;CLPX;COX11;COX17;COX18;COX5A;COX6A           |
| brown | CC | GO:0048471 | perinuclear region of cytoplasm             | 17735 | 469  | 1802 | 62  | 47.76  | 0.01932 | 1.298157 | AATK;ANP32A;APC2;APP;ARF1;ARF3;ATXN2;CALCOCO2;CASC3;CDH1;CKAP4;CSF1;CSNK1D;CTIF;CTNNB1;CT            |
| brown | CC | GO:0071556 | integral to luminal side of endoplasmic ... | 17735 | 28   | 1802 | 7   | 2.85   | 0.01953 | 2.45614  | HLA-B;HLA-C;HLA-DPA1;HLA-E;HM13;SPPL3;TAPBP                                                          |
| brown | CC | GO:0030130 | clathrin coat of trans-Golgi network ves... | 17735 | 11   | 1802 | 4   | 1.12   | 0.01968 | 3.571429 | AP2A1;CLTA;CLTC;CLTCL1                                                                               |
| brown | CC | GO:0031256 | leading edge membrane                       | 17735 | 98   | 1802 | 17  | 9.98   | 0.01979 | 1.703407 | APC2;CLF1;EMR2;EPB41L3;FZD1;ITGA5;KCNC3;LCP1;PLEK;PTPRJ;RAC1;RHOA;SH3YL1;SPRY2;TRAP;TLN1;VA          |
| brown | MF | GO:0004553 | hydrolase activity, hydrolyzing O-glycos... | 17735 | 89   | 1802 | 16  | 9.23   | 0.01991 | 1.733478 | AMY2B;CD44;FUC2;GBA;GLB1;GLB1L;GM2A;HEXB;LYG1;MAN2A2;MAN2B2;MANBA;MGAM;NAGA;NEU1;P                   |
| brown | MF | GO:0060909 | binding, bridging                           | 17735 | 142  | 1802 | 23  | 14.73  | 0.02042 | 1.561439 | ADAP2;ARHGAP1;ARHGAP26;COL8A2;CRKL;CUX1;DAB2;FSCN1;GAB2;GRB10;GRB2;HSPA5;LASP1;PDCD6;SH              |
| brown | MF | GO:0001102 | RNA polymerase II activating transcripti... | 17735 | 34   | 1802 | 8   | 3.53   | 0.02052 | 2.266289 | BHLHE40;CITED2;CREBBP;CTNNB1;EP300;HIPK2;NCOR1;SIN3A                                                 |
| brown | MF | GO:0070008 | serine-type exopeptidase activity           | 17735 | 11   | 1802 | 4   | 1.14   | 0.02095 | 3.508772 | CPVL;CTSA;PRCP;SCPEP1                                                                                |
| brown | MF | GO:0005097 | Rab GTPase activator activity               | 17735 | 54   | 1802 | 11  | 5.6    | 0.02104 | 1.964286 | G6orf170;GDI2;TBC1D1;TBC1D14;TBC1D19;TBC1D2;TBC1D20;TBC1D2B;TBC1D5;TBC1D8;TBC1D5                     |
| brown | CC | GO:0030135 | coated vesicle                              | 17735 | 242  | 1802 | 35  | 24.64  | 0.02115 | 1.420455 | AP1M1;AP2M1;AP3B1;ARCN1;ATP6VDD1;CLTA;CLTC;CLTCL1;COPA;COPB2;COP22;DAB2;DENND1A;D                    |
| brown | MF | GO:0001076 | RNA polymerase II transcription factor b... | 17735 | 97   | 1802 | 17  | 10.06  | 0.02118 | 1.689861 | BHLHE40;CITED2;CREBBP;HDGF;HIPK2;KLF4;MED12;NACC2;NOTCH1;PHF12;SIN3A;SMARCA2;SOX4;SPEN;SF            |
| brown | MF | GO:0001191 | RNA polymerase II transcription factor b... | 17735 | 28   | 1802 | 7   | 2.9    | 0.02143 | 2.413793 | BHLHE40;CITED2;CREBBP;HDGF;PHF12;SIN3A;SPEN                                                          |
| brown | MF | GO:0005158 | insulin receptor binding                    | 17735 | 28   | 1802 | 7   | 2.9    | 0.02143 | 2.413793 | DOK3;FRS3;GRB10;IGF1R;IRS2;PTPN1;TLN1                                                                |
| brown | MF | GO:0016903 | oxidoreductase activity, acting on the a... | 17735 | 41   | 1802 | 9   | 4.25   | 0.02237 | 2.117647 | ADH5;AKR1C3;ALDH1A1;ALDH2;ALDH3B1;ALDH9A1;BCKDHA;DHTKD1;GAPDH                                        |
| brown | CC | GO:0005802 | trans-Golgi network                         | 17735 | 115  | 1802 | 19  | 11.71  | 0.02314 | 1.622545 | ANAPC4;APL3B1;CDH1;CTNNA1;CTNNB1;CYB1;CDH1;CLTA;CLTC;CLTCL1;FURIN;GNAS;HLA-DPA1;KIAA1324;KIF13A;OPTN |
| brown | MF | GO:0030246 | carbohydrate binding                        | 17735 | 215  | 1802 | 32  | 22.3   | 0.02315 | 1.434978 | ALKBH3;BSG;CD209;CD93;CLC;CLEC4C;COLEC12;DGCRR2;ENDOU;FBP1;FCN1;G6PD;GCK;HK2;IGF2R;KLCR4-KL          |
| brown | MF | GO:0016741 | transferase activity, transferring one-c... | 17735 | 183  | 1802 | 28  | 18.98  | 0.0232  | 1.475237 | ASH2L;BCDN13D;CARM1;COQ3;COQ5;DNMT3B;DPH5;EMG1;HENMT1;LCMT2;METTL10;METTL23;METTL5;M                 |
| brown | MF | GO:0008270 | zinc ion binding                            | 17735 | 1977 | 1802 | 231 | 205.09 | 0.02339 | 1.126335 | ADAM19;ADAP2;ADH5;AGBL2;ALB;AMZ2;ANPEP;APOBEC3C;GNAP1;ARAP3;BAZGA3;ATF7;H2AC2;BCL6;BR                |
| brown | CC | GO:0008305 | integrin complex                            | 17735 | 29   | 1802 | 7   | 2.95   | 0.02355 | 2.372881 | ITGA5;ITGA6;ITGAM;ITGAX;ITGB2;ITGB4;MYH9                                                             |
| brown | CC | GO:0017053 | transcriptional repressor complex           | 17735 | 63   | 1802 | 12  | 6.42   | 0.02369 | 1.869159 | CSNK2A1;HDGF;NACC2;NCOR1;PHF12;RCOR1;SIN3A;SKI;SPEN;TLB1X;YWHAB                                      |
| brown | CC | GO:0030312 | external encapsulating structure            | 17735 | 17   | 1802 | 5   | 1.73   | 0.02372 | 2.890173 | B4GALT1;DAG1;GRIN2D;P2RX1;SLC11A1                                                                    |
| brown | MF | GO:0008484 | sulfuric ester hydrolase activity           | 17735 | 17   | 1802 | 5   | 1.76   | 0.0255  | 2.840909 | ARSD;ARSG;GALNS;GNS;SULF2                                                                            |
| brown | MF | GO:0042054 | histone methyltransferase activity          | 17735 | 49   | 1802 | 10  | 5.08   | 0.02679 | 1.968504 | ASH2L;CARM1;MLL2;NSD1;PRMT5;PRMT6;SETD1B;SETDB1;SETMAR;WDR8                                          |
| brown | CC | GO:0005901 | caveola                                     | 17735 | 57   | 1802 | 11  | 5.8    | 0.02707 | 1.896552 | CBL;FLOT2;HCK;HMOX1;IGF1R;INSR;KCNAS5;MYOF;PTRF;SPRED1;SRC                                           |
| brown | CC | GO:0012510 | trans-Golgi network transport vesicle me... | 17735 | 12   | 1802 | 4   | 1.22   | 0.02718 | 3.278689 | AP2A1;CLTA;CLTC;CLTCL1                                                                               |
| brown | CC | GO:0016580 | Sin3 complex                                | 17735 | 12   | 1802 | 4   | 1.22   | 0.02718 | 3.278689 | CSNK2A1;NCOR1;PHF12;SIN3A                                                                            |
| brown | CC | GO:0036038 | TCTN-B9D complex                            | 17735 | 12   | 1802 | 4   | 1.22   | 0.02718 | 3.278689 | AH1;CC2D2A;TCTN1;TMEM67                                                                              |
| brown | CC | GO:0070822 | Sin3-type complex                           | 17735 | 12   | 1802 | 4   | 1.22   | 0.02718 | 3.278689 | CSNK2A1;NCOR1;PHF12;SIN3A                                                                            |
| brown | CC | GO:0071203 | WASH complex                                | 17735 | 12   | 1802 | 4   | 1.22   | 0.02718 | 3.278689 | CAP2B;FAM21A;FAM21C;KIAA0196                                                                         |
| brown | MF | GO:0019902 | phosphatase binding                         | 17735 | 115  | 1802 | 19  | 11.93  | 0.02738 | 1.592624 | ANAPC4;APL3B1;CDH1;CTNNA1;CTNNB1;ELL;ENSA;GCK;GRB2;LILRB1;LILRB2;MAGI2;MAP3K5;SH3YL1;SMG7;           |
| brown | CC | GO:0031966 | mitochondrial membrane                      | 17735 | 496  | 1802 | 64  | 50.51  | 0.02801 | 1.267076 | ATP55;ATPIF1;BCL2L13;BNIP3;C19orf12;CHCHD6;CLPX;COX11;COX18;COX5A;COX6A1;CPOX;CPT1A;CPT2;CY          |
| brown | CC | GO:0005801 | cis-Golgi network                           | 17735 | 30   | 1802 | 7   | 3.05   | 0.02809 | 2.295082 | COP22;GOLGA2;GOLGA5;GOLIM4;GOSR1;KDEL1R;LIMK2                                                        |
| brown | MF | GO:0048306 | calcium-dependent protein binding           | 17735 | 36   | 1802 | 8   | 3.73   | 0.02844 | 2.144772 | ANXA11;ANXA7;PDCD6;RBM22;SEC31A;SLC9A1;TNNC1;TSG101                                                  |
| brown | MF | GO:0008198 | ferrous iron binding                        | 17735 | 12   | 1802 | 4   | 1.24   | 0.02889 | 3.225806 | ALKBH2;ALKBH3;FTO;HAAO                                                                               |
| brown | MF | GO:0000988 | protein binding transcription factor act... | 17735 | 514  | 1802 | 67  | 53.32  | 0.02903 | 1.256564 | ARID1A;ARNT;ATF5;BASP1;BCOR;BHLHE40;BRCA1;CALCOCO1;CARM1;CD3D;CITED2;CREBBP;CTNNB1;DNM1              |
| brown | MF | GO:0016620 | oxidoreductase activity, acting on the a... | 17735 | 30   | 1802 | 7   | 3.11   | 0.03072 | 2.250804 | ADH5;AKR1C3;ALDH1A1;ALDH2;ALDH3B1;ALDH9A1;GAPDH5                                                     |
| brown | CC | GO:0031234 | extrinsic to internal side of plasma mem... | 17735 | 51   | 1802 | 10  | 5.19   | 0.0309  | 1.926782 | GNA11;GNA12;GNA15;GNAI2;GNAL;GNAS;GNAT2;GNB1;GNB5;HCK                                                |
| brown | CC | GO:0030496 | midbody                                     | 17735 | 88   | 1802 | 15  | 8.96   | 0.03163 | 1.674107 | ANXA11;CD42;CTDP1;CTNND1;DNM2;FLCN;GNAI2;HSPA5;KIF13A;MAPRE3;RAB11FIP4;RALB;RHOA;SSH1;T              |
| brown | CC | GO:0016605 | PML body                                    | 17735 | 73   | 1802 | 13  | 7.43   | 0.03171 | 1.749664 | ELF4;HIPK2;MAX;MKNK2;N4BP1;NR2C1;RPAIN;SKI;TOP3A;TP53BP2;TRIM27;TRIM8;UBN1                           |
| brown | MF | GO:0042287 | MHC protein binding                         | 17735 | 24   | 1802 | 6   | 2.49   | 0.03233 | 2.409639 | KLCR4-KLRK1;LILRB1;LILRB2;MARCH8;TAP2;TAPBP                                                          |
| brown | MF | GO:0042605 | peptide antigen binding                     | 17735 | 18   | 1802 | 5   | 1.87   | 0.03237 | 2.673797 | CD209;MAM1L1;SLC7A5;TAP2;TAPBP                                                                       |
| brown | MF | GO:0003712 | transcription cofactor activity             | 17735 | 475  | 1802 | 62  | 49.28  | 0.03383 | 1.258117 | ARID1A;ARNT;ATF5;BASP1;BCOR;BRCA1;CALCOCO1;CARM1;CD3D;CITED2;CREBBP;CTNNB1;DNMT3B;ENO1;              |
| brown | CC | GO:0000790 | nuclear chromatin                           | 17735 | 152  | 1802 | 23  | 15.48  | 0.0345  | 1.485788 | ARID1A;BRD4;CALCOCO1;CBX1;CITED2;CREBBP;CSNK2A1;DNMT3B;H1FO;HNRNPK;KDM2A;KLF4;NACC2;NCC              |
| brown | CC | GO:0031300 | intrinsic to organelle membrane             | 17735 | 218  | 1802 | 31  | 22.2   | 0.03514 | 1.396396 | BNIP3;BSC2L;COX18;CPT1A;CUX1;DPAGT1;ECE1;ELOVL1;EXTL3;FIS1;FUNDC1;GALNT2;HLA-B;HLA-C;HLA-DP          |
| brown | MF | GO:0004725 | protein tyrosine phosphatase activity       | 17735 | 103  | 1802 | 17  | 10.69  | 0.03583 | 1.590271 | ACP1;DUSP12;DUSP18;EYA3;MAP2K1;MDP1;MTMR14;MTMR3;PTPLA;PTPMT1;PTPN1;PTPN6;PTPN9;PTPRJ;               |
| brown | CC | GO:0002102 | podosome                                    | 17735 | 13   | 1802 | 4   | 1.32   | 0.03617 | 3.030303 | BIN2;SH3PX2B;SVIL;TPM4                                                                               |
| brown | CC | GO:0005938 | cell cortex                                 | 17735 | 186  | 1802 | 27  | 18.94  | 0.03752 | 1.425554 | ACTB;ARF6;CAP1;CAPZB;CLF1;CTNNB1;DBNL;DVL3;EPB41;GCK;LASP1;MAEA;MAP2K1;MAPRE1;MARK2;MPP              |
| brown | CC | GO:0030137 | COP1-coated vesicle                         | 17735 | 19   | 1802 | 5   | 1.93   | 0.0376  | 2.590674 | ARCN1;COPA;COPB2;COP22;PACS1                                                                         |
| brown | CC | GO:0044448 | cell cortex part                            | 17735 | 90   | 1802 | 15  | 9.16   | 0.03776 | 1.637555 | ACTB;CAP1;CAPZB;CLF1;EPB41;GCK;LASP1;MAEA;MAPRE1;MARK2;MPP1;MYH9;MYO1F;SPTB;TPM4                     |
| brown | CC | GO:0005743 | mitochondrial inner membrane                | 17735 | 347  | 1802 | 46  | 35.34  | 0.03777 | 1.301641 | ATP55;ATPIF1;CHCHD6;CLPX;COX11;COX18;COX5A;COX6A1;CPOX;CPT1A;CPT2;CYB5R3;CPY27A1;DNAJC19;I           |
| brown | MF | GO:0005681 | androgen receptor binding                   | 17735 | 38   | 1802 | 8   | 3.94   | 0.03824 | 2.030457 | BRCA1;CTNNB1;EP300;KATS5;NSD1;PRKCB;RNF14;WIPI1                                                      |
| brown | CC | GO:0032588 | trans-Golgi network membrane                | 17735 | 32   | 1802 | 7   | 3.26   | 0.03889 | 2.147239 | AP1M1;CLTA;CLTC;GNAS;HLA-DPA1;KIF13A;SCAMP2                                                          |
| brown | MF | GO:0030331 | estrogen receptor binding                   | 17735 | 25   | 1802 | 6   | 2.59   | 0.03893 | 2.316602 | CTNNB1;NCOA6;NSD1;PHB2;PPID;WIPI1                                                                    |
| brown | MF | GO:0046914 | transition metal ion binding                | 17735 | 2217 | 1802 | 254 | 229.99 | 0.03932 | 1.104396 | ADAM19;ADAP2;ADH5;AGBL2;ALB;ALKBH2;ALKBH3;ALOX15B;AMZ2;ANPEP;AOC2;APLP2;APOBEC3C;APP;AF              |
| brown | CC | GO:0030054 | cell junction                               | 17735 | 756  | 1802 | 92  | 76.99  | 0.03948 | 1.19496  | AATF;ACTN1;AFAP1;AH1;AMICA1;ANO7;APBB1P;ARHGAP21;ARHGAP24;ARHGAP26;ARHGAP31;B4GALT1;I                |
| brown | MF | GO:0016798 | hydrolase activity, acting on glycosyl b... | 17735 | 112  | 1802 | 18  | 11.62  | 0.03968 | 1.549053 | ADPRH;AMY2B;CD44;FUC2;GBA;GLB1;GLB1L;GM2A;HEXB;LYG1;MAN2A2;MAN2B2;MANBA;MGAM;NAGA;                   |
| brown | MF | GO:0019903 | protein phosphatase binding                 | 17735 | 74   | 1802 | 13  | 7.68   | 0.03978 | 1.692708 | ANAPC4;AP3B1;CDH1;CTNNB1;CTNND1;ENSA;GCK;GRB2;LILRB1;LILRB2;MAP3K5;SMG7;SOD1                         |
| brown | MF | GO:0019200 | carbohydrate kinase activity                | 17735 | 19   | 1802 | 5   | 1.97   | 0.04029 | 2.538071 | GCK;HK1;HK2;NAGK;PKFB3                                                                               |

|       |    |            |                                             |       |       |      |      |         |          |          |                                                                                                         |
|-------|----|------------|---------------------------------------------|-------|-------|------|------|---------|----------|----------|---------------------------------------------------------------------------------------------------------|
| brown | CC | GO:0031301 | integral to organelle membrane              | 17735 | 196   | 1802 | 28   | 19.96   | 0.04138  | 1.402806 | BNIP3;BSCL2;COX18;CPT1A;CUX1;DPAGT1;ELOVL1;FIS1;FUNDCl;GALNT2;HLA-B;HLA-C;HLA-DPA1;HLA-E;HM             |
| brown | CC | GO:0034708 | methyltransferase complex                   | 17735 | 61    | 1802 | 11   | 6.21    | 0.04232  | 1.771337 | ACTB;ASH2L;CHD8;JARID2;MAX;MLL2;NCOA6;SETD1B;TAF4;TRMT61B;WDR82                                         |
| brown | MF | GO:0019213 | deacetylase activity                        | 17735 | 32    | 1802 | 7    | 3.32    | 0.04238  | 2.108434 | ESD1;HDAC4;NACC2;NDST1;NDST2;SIN3A                                                                      |
| brown | CC | GO:0031901 | early endosome membrane                     | 17735 | 84    | 1802 | 14   | 8.55    | 0.04372  | 1.637427 | CHEB1;EPHB1;FAM21A;FAM21C;FIG4;HLA-B;HLA-C;HLA-E;HSD17B6;MARCH8;RAB5B;RAB5C;RUFY1;SNX1                  |
| brown | MF | GO:0016706 | oxidoreductase activity, acting on paire... | 17735 | 46    | 1802 | 9    | 4.77    | 0.04418  | 1.886792 | ALKBH2;ALKBH3;FTO;KDM2A;KDM5B;PHF8;PHYH;PLOD1;TET3                                                      |
| brown | CC | GO:0044455 | mitochondrial membrane part                 | 17735 | 148   | 1802 | 22   | 15.07   | 0.04504  | 1.459854 | ATP1F1;BNIP3;COX18;COX6A1;CPT1A;FIS1;FUNDCl;IMMP2L;MFN2;MICU1;MRPL45;NDUFA12;NDUFA7;NDL                 |
| brown | CC | GO:0005791 | rough endoplasmic reticulum                 | 17735 | 47    | 1802 | 9    | 4.79    | 0.04513  | 1.878914 | GLUL;HM13;PLOD1;PSEN1;RP9;RPN1;SPPL3;SRPR;STAU1                                                         |
| brown | CC | GO:0031941 | filamentous actin                           | 17735 | 20    | 1802 | 5    | 2.04    | 0.04606  | 2.45098  | ACTG1;BRCA1;MYO1F;PAK1;TPM4                                                                             |
| brown | CC | GO:0000785 | chromatin                                   | 17735 | 300   | 1802 | 40   | 30.55   | 0.04626  | 1.309329 | ARID1A;BAZ2A;BRD4;CALCOCO1;CBX1;CBX6;CHEK1;CITED2;CREBBP;CSNK2A1;DNMT3B;DSSC1;EXOSC3;HIF                |
| brown | CC | GO:0030126 | COPI vesicle coat                           | 17735 | 14    | 1802 | 4    | 1.43    | 0.04666  | 2.797203 | ARCN1;COPA;COPB2;COPZ2                                                                                  |
| brown | CC | GO:0030313 | cell envelope                               | 17735 | 14    | 1802 | 4    | 1.43    | 0.04666  | 2.797203 | DAG1;GRIN2D;P2RX1;SLC11A1                                                                               |
| brown | CC | GO:0031307 | integral to mitochondrial outer membrane    | 17735 | 14    | 1802 | 4    | 1.43    | 0.04666  | 2.797203 | BNIP3;CPT1A;FIS1;FUNDCl                                                                                 |
| brown | CC | GO:0044462 | external encapsulating structure part       | 17735 | 14    | 1802 | 4    | 1.43    | 0.04666  | 2.797203 | DAG1;GRIN2D;P2RX1;SLC11A1                                                                               |
| brown | CC | GO:0043005 | neuron projection                           | 17735 | 627   | 1802 | 77   | 63.85   | 0.04702  | 1.205951 | ABAT;ACP1;ACTB;ACTN1;ADCY4;ALDOC;ANKS1A;APP;ATP6V0D1;BASP1;BECN1;BNIP3;CACNG8;CDC42;CDH1                |
| brown | MF | GO:0015078 | hydrogen ion transmembrane transporter a... | 17735 | 99    | 1802 | 16   | 10.27   | 0.04821  | 1.557936 | ATP5B;ATP6V0A1;ATP6V0C;ATP6V0D1;ATP6V1B2;COX11;COX5A;COX6A1;CYB5A;SLC11A1;SLC36A1;SLC9A1;               |
| brown | MF | GO:0001190 | RNA polymerase II transcription factor b... | 17735 | 33    | 1802 | 7    | 3.42    | 0.04916  | 2.046784 | CITED2;CREBBP;HIPK2;KLF4;NOTCH1;SMARCA2;SOX4                                                            |
| brown | MF | GO:0004683 | calmodulin-dependent protein kinase acti... | 17735 | 20    | 1802 | 5    | 2.07    | 0.04929  | 2.415459 | CAMK1D;CAMK2G;CAMKK2;DAPK2;PHKA2                                                                        |
| brown | MF | GO:0048365 | Rac GTPase binding                          | 17735 | 20    | 1802 | 5    | 2.07    | 0.04929  | 2.415459 | CYFP1;NCF2;RAB7A;RALBP1;SRGAP2                                                                          |
| brown | MF | GO:0004089 | carbonate dehydratase activity              | 17735 | 14    | 1802 | 4    | 1.45    | 0.04945  | 2.758621 | CA13;CA14;CA3;CA6                                                                                       |
| brown | MF | GO:0005159 | insulin-like growth factor receptor bind... | 17735 | 14    | 1802 | 4    | 1.45    | 0.04945  | 2.758621 | INSR;SOCS2;YWHAG;YWHAH                                                                                  |
| brown | MF | GO:0015929 | hexosaminidase activity                     | 17735 | 14    | 1802 | 4    | 1.45    | 0.04945  | 2.758621 | CD44;GMA2;HEXB;NAGA                                                                                     |
| blue  | CC | GO:0005622 | intracellular                               | 17735 | 12344 | 2487 | 1968 | 1738.17 | 1.00E-30 | 1.132225 | AAK1;AARS;AARS2;ABCA2;ABCB1;ABCC1;ABCF1;ABCF2;ABHD6;ABL1;ABL2;ABLUM1;ACAA2;ACACA;ACACB;AI               |
| blue  | CC | GO:0044424 | intracellular part                          | 17735 | 12103 | 2487 | 1926 | 1704.23 | 3.00E-30 | 1.130129 | AAK1;AARS;AARS2;ABCA2;ABCB1;ABCC1;ABCF1;ABCF2;ABHD6;ABL1;ABL2;ABLUM1;ACAA2;ACACA;ACACB;AI               |
| blue  | CC | GO:0005634 | nucleus                                     | 17735 | 5873  | 2487 | 1073 | 826.98  | 1.00E-29 | 1.297492 | ABCC1;ABCF1;ABL1;ACLY;ACO2;ACTR8;ADD1;AGBL5;AGPAT3;AHNAK;AIF1;AIFM1;AKAP17A;AKAP8;AKNA;AKNA1;AI         |
| blue  | CC | GO:0044428 | nuclear part                                | 17735 | 2482  | 2487 | 538  | 349.49  | 2.60E-29 | 1.539386 | ABCF1;ABL1;ACTR8;AGPAT3;AKAP17A;AKAP8;AMOTL1;ANAPC1;ANAPC3;ANAPCS;ANAP7;ANKLE2;ANKS1                    |
| blue  | CC | GO:0043231 | intracellular membrane-bounded organelle    | 17735 | 9560  | 2487 | 1585 | 1346.15 | 1.40E-27 | 1.177432 | AAK1;AARS2;ABCA2;ABCB1;ABCC1;ABCF1;ABCF2;ABHD6;ABL1;ACAA2;ACACA;ACACB;ACAD8;ACE;ACER2;AC                |
| blue  | CC | GO:0043227 | membrane-bounded organelle                  | 17735 | 9590  | 2487 | 1588 | 1350.37 | 2.40E-27 | 1.175974 | AAK1;AARS2;ABCA2;ABCB1;ABCC1;ABCF1;ABCF2;ABHD6;ABL1;ACAA2;ACACA;ACACB;ACAD8;ACE;ACER2;AC                |
| blue  | CC | GO:0070013 | intracellular organelle lumen               | 17735 | 2677  | 2487 | 560  | 376.95  | 1.90E-26 | 1.485608 | ABCF1;ABL1;ACAD8;ACO2;ACOX2;ACOX3;ACTR8;AKAP17A;AKAP8;ALDH1B1;ALDH5A1;ALDH6A1;ALDH7A1;#                 |
| blue  | CC | GO:0031974 | membrane-enclosed lumen                     | 17735 | 2770  | 2487 | 571  | 390.05  | 2.40E-25 | 1.463915 | ABCF1;ABL1;ACAD8;ACN9;ACO2;ACOX2;ACOX3;ACTR8;AKAP17A;AKAP8;AIFM1;AK2;AKAP17A;AKAP8;ALDH1B1;ALDH5A1;ALI  |
| blue  | CC | GO:0043233 | organelle lumen                             | 17735 | 2722  | 2487 | 563  | 383.29  | 2.50E-25 | 1.468862 | ABCF1;ABL1;ACAD8;ACO2;ACOX2;ACOX3;ACTR8;AKAP17A;AKAP8;ALDH1B1;ALDH5A1;ALDH6A1;ALDH7A1;#                 |
| blue  | CC | GO:0031981 | nuclear lumen                               | 17735 | 2101  | 2487 | 457  | 295.84  | 8.10E-25 | 1.544754 | ABCF1;ABL1;ACTR8;AKAP17A;AKAP8;ANAPC1;ANAPCS;ANAP7;ANKS1B;APBB1;ARNTL2;ASCC1;ATXN1;ATF6                 |
| blue  | CC | GO:0043229 | intracellular organelle                     | 17735 | 10522 | 2487 | 1699 | 1481.61 | 1.80E-24 | 1.146726 | AAK1;AARS2;ABCA2;ABCB1;ABCC1;ABCF1;ABCF2;ABHD6;ABL1;ABL2;ABLUM1;ACAA2;ACACA;ACACB;ACAD8;                |
| blue  | CC | GO:0043226 | organelle                                   | 17735 | 10552 | 2487 | 1702 | 1485.83 | 2.90E-24 | 1.145488 | AAK1;AARS2;ABCA2;ABCB1;ABCC1;ABCF1;ABCF2;ABHD6;ABL1;ABL2;ABLUM1;ACAA2;ACACA;ACACB;ACAD8;                |
| blue  | CC | GO:0044446 | intracellular organelle part                | 17735 | 6219  | 2487 | 1092 | 875.7   | 5.00E-23 | 1.247002 | ABCA2;ABCB1;ABCF1;ABCF2;ABL1;ACAA2;ACAD8;ACER2;ACN9;ACO2;ACOX2;ACOX3;ACSL5;ACTR10;ACTR8;                |
| blue  | CC | GO:0044422 | organelle part                              | 17735 | 6321  | 2487 | 1104 | 890.06  | 1.80E-22 | 1.240366 | ABCA2;ABCB1;ABCF1;ABCF2;ABL1;ACAA2;ACAD8;ACER2;ACN9;ACO2;ACOX2;ACOX3;ACSL5;ACTR10;ACTR8;                |
| blue  | MF | GO:0000166 | nucleotide binding                          | 17735 | 2385  | 2487 | 500  | 346.98  | 1.00E-20 | 1.441005 | AAK1;AARS2;ABCA2;ABCB1;ABCC1;ABCF1;ABCF2;ABL1;ABL2;ACACA;ACACB;ACLY;ACSL5;ACT                           |
| blue  | MF | GO:1901265 | nucleoside phosphate binding                | 17735 | 2386  | 2487 | 500  | 347.13  | 1.10E-20 | 1.440383 | AAK1;AARS2;ABCA2;ABCB1;ABCC1;ABCF1;ABCF2;ABL1;ABL2;ACACA;ACACB;ACAD8;ACLY;ACC                           |
| blue  | MF | GO:0005524 | ATP binding                                 | 17735 | 1462  | 2487 | 338  | 212.7   | 2.00E-20 | 1.589093 | AAK1;AARS2;ABCA2;ABCB1;ABCC1;ABCF1;ABCF2;ABL1;ABL2;ACACA;ACACB;ACLY;ACSL5;ACT                           |
| blue  | MF | GO:0030554 | adenyl nucleotide binding                   | 17735 | 1495  | 2487 | 343  | 217.5   | 3.70E-20 | 1.577011 | AAK1;AARS2;ABCA2;ABCB1;ABCC1;ABCF1;ABCF2;ABL1;ABL2;ACACA;ACACB;ACLY;ACSL5;ACT                           |
| blue  | MF | GO:0032559 | adenyl ribonucleotide binding               | 17735 | 1491  | 2487 | 341  | 216.92  | 8.40E-20 | 1.572008 | AAK1;AARS2;ABCA2;ABCB1;ABCC1;ABCF1;ABCF2;ABL1;ABL2;ACACA;ACACB;ACLY;ACSL5;ACT                           |
| blue  | MF | GO:0036094 | small molecule binding                      | 17735 | 2525  | 2487 | 519  | 367.35  | 1.20E-19 | 1.412822 | AAK1;AARS2;ABCA2;ABCB1;ABCC1;ABCF1;ABCF2;ABL1;ABL2;ACACA;ACACB;ACAD8;ACLY;ACC                           |
| blue  | CC | GO:0005654 | nucleoplasm                                 | 17735 | 1481  | 2487 | 323  | 208.54  | 1.70E-17 | 1.548864 | ABCF1;AKAP17A;ANAPC1;ANAPCS;ANAP7;ANKS1B;APBB1;ARNTL2;ASCC1;ATM;ATXN2L;BEX1;BLM;BRD1;B                  |
| blue  | MF | GO:0032549 | ribonucleoside binding                      | 17735 | 1809  | 2487 | 383  | 263.18  | 2.60E-16 | 1.455278 | AAK1;AARS2;ABCA2;ABCB1;ABCC1;ABCF1;ABCF2;ABL1;ABL2;ACACA;ACACB;ACLY;ACSL5;ACT                           |
| blue  | MF | GO:0001882 | nucleoside binding                          | 17735 | 1818  | 2487 | 384  | 264.49  | 3.50E-16 | 1.451851 | AAK1;AARS2;ABCA2;ABCB1;ABCC1;ABCF1;ABCF2;ABL1;ABL2;ACACA;ACACB;ACLY;ACSL5;ACT                           |
| blue  | MF | GO:1901363 | heterocyclic compound binding               | 17735 | 5302  | 2487 | 939  | 771.36  | 6.90E-16 | 1.217733 | AAK1;AARS2;ABCA2;ABCB1;ABCC1;ABCF1;ABCF2;ABL1;ABL2;ACACA;ACACB;ACAD8;ACLY;ACC                           |
| blue  | BP | GO:0046483 | heterocycle metabolic process               | 17735 | 5361  | 2487 | 961  | 795.62  | 1.40E-15 | 1.207863 | AAK1;AARS2;ABCA2;ABCB1;ABCC1;ABCF1;ABCF2;ABL1;ABL2;ACACA;ACACB;ACAD8;ACLY;ACTR8;ACV1;ADAT1;ADCY6;ADCY7; |
| blue  | MF | GO:0032550 | purine ribonucleoside binding               | 17735 | 1805  | 2487 | 379  | 262.6   | 1.50E-15 | 1.44326  | AAK1;AARS2;ABCA2;ABCB1;ABCC1;ABCF1;ABCF2;ABL1;ABL2;ACACA;ACACB;ACLY;ACSL5;ACT                           |
| blue  | CC | GO:0032991 | macromolecular complex                      | 17735 | 3893  | 2487 | 702  | 548.18  | 1.70E-15 | 1.280601 | ABCA2;ABCF1;ABCF2;ACLY;ACTR10;ACTR8;ACV1;ADD1;AIF1;AKAP17A;ALMS1;AMOTL1;ANAPC1;ANAPC3;                  |
| blue  | MF | GO:0001883 | purine nucleoside binding                   | 17735 | 1807  | 2487 | 379  | 262.89  | 1.80E-15 | 1.441668 | AAK1;AARS2;ABCA2;ABCB1;ABCC1;ABCF1;ABCF2;ABL1;ABL2;ACACA;ACACB;ACLY;ACTR10;ACTR8;                       |
| blue  | MF | GO:0035639 | purine ribonucleoside triphosphate bindi... | 17735 | 1796  | 2487 | 377  | 261.29  | 1.90E-15 | 1.442841 | AAK1;AARS2;ABCA2;ABCB1;ABCC1;ABCF1;ABCF2;ABL1;ABL2;ACACA;ACACB;ACLY;ACSL5;ACT                           |
| blue  | MF | GO:0032553 | ribonucleotide binding                      | 17735 | 1846  | 2487 | 385  | 268.56  | 2.60E-15 | 1.433572 | AAK1;AARS2;ABCA2;ABCB1;ABCC1;ABCF1;ABCF2;ABL1;ABL2;ACACA;ACACB;ACLY;ACSL5;ACT                           |
| blue  | MF | GO:0017076 | purine nucleotide binding                   | 17735 | 1836  | 2487 | 383  | 267.11  | 3.00E-15 | 1.433866 | AAK1;AARS2;ABCA2;ABCB1;ABCC1;ABCF1;ABCF2;ABL1;ABL2;ACACA;ACACB;ACLY;ACSL5;ACT                           |
| blue  | MF | GO:0032555 | purine ribonucleotide binding               | 17735 | 1831  | 2487 | 381  | 266.38  | 5.40E-15 | 1.430288 | AAK1;AARS2;ABCA2;ABCB1;ABCC1;ABCF1;ABCF2;ABL1;ABL2;ACACA;ACACB;ACLY;ACSL5;ACT                           |
| blue  | BP | GO:0006139 | nucleobase-containing compound metabolic... | 17735 | 5209  | 2487 | 934  | 773.06  | 5.50E-15 | 1.208186 | AAK1;AARS2;ABCA2;ABCB1;ABCC1;ABCF1;ABCF2;ABL1;ABL2;ACACA;ACACB;ACAD8;ACLY;ACTR8;ACV1;ADAT1;ADCY6;ADCY7; |
| blue  | BP | GO:0006725 | cellular aromatic compound metabolic pro... | 17735 | 5371  | 2487 | 957  | 797.1   | 1.10E-14 | 1.200602 | AARS;AARS2;ABCA2;ABCC1;ABL1;ABLUM1;ACACA;ACACB;ACAD8;ACLY;ACTR8;ACV1;ADAT1;ADCY6;ADCY7;                 |
| blue  | MF | GO:0097159 | organic cyclic compound binding             | 17735 | 5372  | 2487 | 942  | 781.54  | 1.20E-14 | 1.205313 | AAK1;AARS2;ABCA2;ABCB1;ABCC1;ABCF1;ABCF2;ABL1;ABL2;ACACA;ACACB;ACAD8;ACLY;ACC                           |
| blue  | CC | GO:0044464 | cell part                                   | 17735 | 14451 | 2487 | 2148 | 2034.85 | 1.30E-14 | 1.055606 | AAK1;AARS2;ABCA2;ABCB1;ABCC1;ABCF1;ABCF2;ABHD6;ABL1;ABL2;ABLUM1;ACAA2;ACACA;#                           |
| blue  | CC | GO:0005623 | cell                                        | 17735 | 14452 | 2487 | 2148 | 2034.99 | 1.40E-14 | 1.055533 | AAK1;AARS2;ABCA2;ABCB1;ABCC1;ABCF1;ABCF2;ABHD6;ABL1;ABL2;ABLUM1;ACAA2;ACACA;#                           |
| blue  | BP | GO:0034641 | cellular nitrogen compound metabolic pro... | 17735 | 5595  | 2487 | 989  | 830.34  | 2.70E-14 | 1.191078 | AAK1;AARS2;ABCA2;ABCF1;ABL1;ABLUM1;ACACA;ACACB;ACAD8;ACE;ACER2;ACLY;ACTR8;ACV1;ADAT1;ADI                |
| blue  | BP | GO:0044237 | cellular metabolic process                  | 17735 | 8597  | 2487 | 1432 | 1275.86 | 4.60E-14 | 1.12238  | AAK1;AARS2;ABCA2;ABCC1;ABCF1;ABL1;ABL2;ABLUM1;ACAA2;ACACA;ACACB;ACAD8;ACE;ACER2;ACLY                    |
| blue  | BP | GO:1901360 | organic cyclic compound metabolic proces... | 17735 | 5578  | 2487 | 983  | 827.82  | 9.00E-14 | 1.187456 | AARS;AARS2;ABCA2;ABCC1;ABL1;ABLUM1;ACAA2;ACACA;ACACB;ACAD8;ACLY;ACOX2;ACTR8;ACV1;ADAT1;                 |
| blue  | CC | GO:0044451 | nucleoplasm part                            | 17735 | 823   | 2487 | 193  | 115.89  | 1.00E-13 | 1.665372 | AKAP17A;ANKS1B;APBB1;ARNTL2;ASCC1;ATXN2L;BEX1;BLM;BRD1;BRP1;C1D;CBX5;CCNT1;CD3EAP;CDKN2                 |
| blue  | MF | GO:0005488 | binding                                     | 17735 | 11799 | 2487 | 1845 | 1716.57 | 1.00E-13 | 1.074818 | AAK1;AARS2;ABCA2;ABCB1;ABCC1;ABCF1;ABCF2;ABL1;ABL2;ABLUM1;ACAA2;ACACA;ACACB;ACAD8;#                     |
| blue  | BP | GO:0044260 | cellular macromolecule metabolic process    | 17735 | 6621  | 2487 | 1140 | 982.61  | 1.10E-13 | 1.160175 | AAK1;AARS2;ABCA2;ABCF1;ABL1;ABL2;ABLUM1;ACAD8;ACER2;ACTR8;ACV1;ADAT1;ADCY3;ADCY6;AE                     |
| blue  | CC | GO:0005737 | cytoplasm                                   | 17735 | 9016  | 2487 | 1433 | 1269.55 | 1.50E-13 | 1.128746 | AAK1;AARS2;ABCA2;ABCB1;ABCC1;ABCF1;ABCF2;ABHD6;ABL1;ABL2;ABLUM1;ACAA2;ACACA;ACACB;AI                    |
| blue  | MF | GO:0043168 | anion binding                               | 17735 | 2346  | 2487 | 460  | 341.31  | 1.60E-13 | 1.347748 | AAK1;AARS2;ABCA2;ABCB1;ABCC1;ABCF1;ABCF2;ABL1;ABL2;ACACA;ACACB;ACAD8;ACE;ACLY                           |
| blue  | BP | GO:0044238 | primary metabolic process                   | 17735 | 8755  | 2487 | 1450 | 1299.31 | 2.50E-13 | 1.115977 | AAK1;AARS2;ABCA2;ABCC1;ABCF1;ABL1;ABL2;ABLUM1;ACAA2;ACACA;ACACB;ACAD8;ACE;ACER2;ACLY                    |
| blue  | BP | GO:0090304 | nucleic acid metabolic process              | 17735 | 4431  | 2487 | 802  | 657.6   | 3.30E-13 | 1.219586 | AARS;AARS2;ABCA2;ABL1;ABLUM1;ACAD8;ACTR8;ACV1;ADAT1;AIFM1;AIFM2;AKAP17A;AKAP8;AKNA;ALX3                 |
| blue  | CC | GO:0043234 | protein complex                             | 17735 | 3294  | 2487 | 596  | 463.83  | 3.80E-13 | 1.284954 | ABCA2;ABCF2;ACTR10;ACTR8;ACV1;ADD1;AIF1;ALMS1;AMOTL1;ANAPC1;ANAPC3;ANAPCS;ANAPC7                        |

|      |    |            |                                             |       |       |      |      |         |          |          |                                                                                                          |
|------|----|------------|---------------------------------------------|-------|-------|------|------|---------|----------|----------|----------------------------------------------------------------------------------------------------------|
| blue | BP | GO:0071704 | organic substance metabolic process         | 17735 | 8996  | 2487 | 1481 | 1335.08 | 8.30E-13 | 1.109297 | AAK1;AARS;AARS2;ABCA2;ABCC1;ABCF1;ABL1;ABL2;ABLIM1;ACAA2;ACACA;ACACB;ACAD8;ACE;ACER2;ACLY                |
| blue | BP | GO:0006807 | nitrogen compound metabolic process         | 17735 | 5942  | 2487 | 1026 | 881.84  | 6.00E-12 | 1.163476 | AARS;AARS2;ABCA2;ABCC1;ABL1;ABLIM1;ACACA;ACACB;ACAD8;ACE;ACER2;ACLY;ACR8;ACVR1;ADAT1;AD                  |
| blue | MF | GO:0003676 | nucleic acid binding                        | 17735 | 3299  | 2487 | 602  | 479.95  | 1.60E-11 | 1.254297 | AARS;AARS2;ABCF1;ABL1;ADAT1;AHD1;AIFM1;AIFM2;AKAP1;AKAP17A;AKAP8;AKNA;ALX3;APOBEC3F;AO                   |
| blue | BP | GO:0008152 | metabolic process                           | 17735 | 9452  | 2487 | 1537 | 1402.75 | 1.70E-11 | 1.095705 | AAK1;AARS;AARS2;ABCA2;ABCC1;ABCF1;ABL1;ABL2;ABLIM1;ACAA2;ACACA;ACACB;ACAD8;ACE;ACEF                      |
| blue | MF | GO:0004386 | helicase activity                           | 17735 | 143   | 2487 | 53   | 20.8    | 2.00E-11 | 2.548077 | BLM;CHD1;CHD2;CHD3;CHD4;CHD6;DDX10;DDX17;DDX18;DDX19A;DDX19B;DDX20;DDX23;DDX24;DDX27                     |
| blue | MF | GO:0005515 | protein binding                             | 17735 | 7306  | 2487 | 1206 | 1062.91 | 2.30E-11 | 1.134621 | AAK1;ABC81;ABCF1;ABL1;ABL2;ABLIM1;ACAA2;ACACA;ACACB;ACE;ACOX2;ACOX3;ACR8;ACVR1;ADAM11;A                  |
| blue | BP | GO:0010467 | gene expression                             | 17735 | 4403  | 2487 | 785  | 653.44  | 2.60E-11 | 1.201334 | AAK1;AARS;AARS2;ABCA2;ABCF1;ABL1;ABLIM1;ACAD8;ACR8;ACVR1;ADAT1;AFG3L2;AKAP17A;AKNA;AKT2                  |
| blue | BP | GO:0006396 | RNA processing                              | 17735 | 646   | 2487 | 158  | 95.87   | 3.30E-11 | 1.648065 | AARS;ADAT1;AKAP17A;AQR;BICD1;C1D;C22orf28;CCAR1;CDK11;CDKN2A;CELF1;CLK2;CNOT10;CPSF3;CSTF                |
| blue | MF | GO:0008026 | ATP-dependent helicase activity             | 17735 | 106   | 2487 | 43   | 15.42   | 5.20E-11 | 2.788586 | BLM;CHD1;CHD2;CHD3;CHD4;CHD6;DDX10;DDX17;DDX18;DDX19A;DDX19B;DDX20;DDX23;DDX24;DDX27                     |
| blue | MF | GO:0070035 | purine NTP-dependent helicase activity      | 17735 | 106   | 2487 | 43   | 15.42   | 5.20E-11 | 2.788586 | BLM;CHD1;CHD2;CHD3;CHD4;CHD6;DDX10;DDX17;DDX18;DDX19A;DDX19B;DDX20;DDX23;DDX24;DDX27                     |
| blue | MF | GO:0016887 | ATPase activity                             | 17735 | 353   | 2487 | 98   | 51.36   | 5.80E-11 | 1.9081   | ABCA2;ABCB1;ABCC1;ABCC10;ABCF1;ABCF2;ATP10A;ATP13A1;ATP1A1;ATP1A3;ATP1B3;ATP2A2;ATP2A3;A                 |
| blue | BP | GO:0043170 | macromolecule metabolic process             | 17735 | 7334  | 2487 | 1226 | 1088.42 | 7.50E-11 | 1.126403 | AAK1;AARS;AARS2;ABCA2;ABCF1;ABL1;ABL2;ABLIM1;ACACA;ACAD8;ACE;ACER2;ACR8;ACVR1;ADAM11;AD                  |
| blue | CC | GO:0005730 | nucleolus                                   | 17735 | 622   | 2487 | 146  | 87.58   | 1.10E-10 | 1.667047 | ABL1;ATF6B;BLM;BMS1;C14orf169;C16orf88;C1D;CBX5;CCND2;CCT5;CD3EAP;CDKN2A;CEP85;CHD3;CIRH1A               |
| blue | CC | GO:0004328 | non-membrane-bounded organelle              | 17735 | 3122  | 2487 | 553  | 439.61  | 1.60E-10 | 1.257933 | ABCA2;ABCF1;ABL1;ABL2;ABLIM1;ACTR10;ACTR8;ADD1;AIF1;AK5;AKAP8;AKAP9;ALMS1;ANK3;ANKS18;APO                |
| blue | CC | GO:0043232 | intracellular non-membrane-bounded organ... | 17735 | 3122  | 2487 | 553  | 439.61  | 1.60E-10 | 1.257933 | ABCA2;ABCF1;ABL1;ABL2;ABLIM1;ACTR10;ACTR8;ADD1;AIF1;AK5;AKAP8;AKAP9;ALMS1;ANK3;ANKS18;APO                |
| blue | CC | GO:0016604 | nuclear body                                | 17735 | 276   | 2487 | 78   | 38.86   | 5.00E-10 | 2.007205 | AKAP17A;AKNA;ATXN2;BLM;CBX5;CDKN2A;CELF1;CLK2;CSTF2;CTR9;DDX20;DDX23;DDX24;DDX26;DGK                     |
| blue | MF | GO:0042623 | ATPase activity, coupled                    | 17735 | 278   | 2487 | 80   | 40.44   | 5.40E-10 | 1.978239 | ABCA2;ABCB1;ABCC1;ABCC10;ATP10A;ATP13A1;ATP1A1;ATP1A3;ATP1B3;ATP2A2;ATP2A3;ATP5A1;ATP5B                  |
| blue | BP | GO:0016070 | RNA metabolic process                       | 17735 | 3911  | 2487 | 697  | 580.42  | 9.00E-10 | 1.200855 | AARS;AARS2;ABCA2;ABL1;ABLIM1;ACAD8;ACTR8;ACVR1;ADAT1;AKAP17A;AKNA;ALX3;APBB1;APOBEC3F;AC                 |
| blue | BP | GO:0009987 | cellular process                            | 17735 | 12861 | 2487 | 1986 | 1089.67 | 2.60E-09 | 1.040515 | AAK1;AARS;AARS2;ABCA2;ABCC1;ABCF1;ABL1;ABL2;ABLIM1;ACAD8;ACTR8;ACVR1;ADAT1;AKAP17A;AKNA;ALX3;APOBEC3F;AC |
| blue | CC | GO:0005829 | cytosol                                     | 17735 | 2362  | 2487 | 426  | 332.59  | 4.10E-09 | 1.280856 | AARS;ABL1;ABL2;ACACA;ACACB;ACLY;ADD1;ADSS;AGBL5;AHS1A1;AIF1;AIFM1;AIFM2;AK2;AK3;AKAP1;AKAP9              |
| blue | MF | GO:0003723 | RNA binding                                 | 17735 | 851   | 2487 | 184  | 123.81  | 7.00E-09 | 1.486148 | AARS;AARS2;ABCF1;ADAT1;AKAP1;AKAP17A;APOBEC3F;AQR;ASCC1;ATXN11;C1D;CALR;CBX7;CNT1;CELF1                  |
| blue | BP | GO:0006397 | mRNA processing                             | 17735 | 405   | 2487 | 102  | 60.11   | 2.30E-08 | 1.696889 | AKAP17A;AQR;CCAR1;CELF1;CNOT10;CPSF3;CSTF1;CSTF2;CSTF3;CTNBL1;DBR1;DDX20;DDX23;DDX46;DD                  |
| blue | BP | GO:0008380 | RNA splicing                                | 17735 | 328   | 2487 | 86   | 48.68   | 4.30E-08 | 1.766639 | AKAP17A;AQR;C22orf28;CCAR1;CELF1;CLK2;CPSF3;CSTF1;CSTF2;CSTF3;CTNBL1;DBR1;DDX20;DDX23;DD                 |
| blue | CC | GO:0005739 | mitochondrion                               | 17735 | 1488  | 2487 | 281  | 209.53  | 4.60E-08 | 1.341097 | AARS2;ABCF2;ABHD6;ABL1;ACAA2;ACACA;ACACB;ACAD8;ACLY;ACN9;ACOX2;ACSL5;AFG3L2;AGK;AG                       |
| blue | BP | GO:0006996 | organelle organization                      | 17735 | 2139  | 2487 | 401  | 317.44  | 4.90E-08 | 1.263231 | AARS2;ABL1;ABL2;ABLIM1;ACTR8;ADD1;AFG3L2;AIF1;AIFM1;AIFM2;AKAP8;AKT2;AKT3;ALMS1;ALS2CL;ANA               |
| blue | CC | GO:0005681 | spliceosomal complex                        | 17735 | 147   | 2487 | 46   | 20.7    | 6.60E-08 | 2.222222 | AKAP17A;AQR;CTNBL1;DDX20;DDX23;DHX15;DHX35;DHX38;DHN9;EFTUD2;EIF4A3;GEMIN4;GELT1;P                       |
| blue | BP | GO:0006259 | DNA metabolic process                       | 17735 | 866   | 2487 | 184  | 128.52  | 1.10E-07 | 1.431684 | ABL1;ACTR8;AIFM1;AIFM2;AKAP8;APBB1;APOBEC3F;ATM;AXIN2;BAHD1;BATF;BAZ1B;BCL11B;BLM;BRD2;C                 |
| blue | CC | GO:0005694 | chromosome                                  | 17735 | 631   | 2487 | 136  | 88.85   | 1.40E-07 | 1.53067  | ACTR8;AKAP8;ASXL1;ATM;BAHD1;BAZ1B;BLM;CAPN2;CBX2;CBX5;CBX7;CCND2;CD3EAP;CDKN2A;CENPN;CE                  |
| blue | BP | GO:0051276 | chromosome organization                     | 17735 | 700   | 2487 | 154  | 103.89  | 1.40E-07 | 1.482337 | AIFM2;AKAP8;APBB1;ARID1B;ASXL1;ATM;AXIN2;BAHD1;BAZ1B;BLM;BPTF;BRD1;BRD2;BRD7;BRPF1;C14orf                |
| blue | CC | GO:0070603 | SWI/SNF-type complex                        | 17735 | 60    | 2487 | 25   | 8.45    | 1.60E-07 | 2.95858  | ACTR8;ARID1B;BAZ1B;BPTF;CHD3;CHD4;HDAC1;INO80;MTA1;MTA2;MTA3;NCR1;NFRKB;PHF10;RBBP4;RBB                  |
| blue | CC | GO:0044427 | chromosomal part                            | 17735 | 538   | 2487 | 118  | 75.76   | 3.60E-07 | 1.55755  | ACTR8;ASXL1;ATM;BAZ1B;BLM;CAPN2;CBX2;CBX5;CBX7;CCND2;CDKN2A;CENPN;CENPO;CHEK2;CTC1;CTCF                  |
| blue | CC | GO:0000792 | heterochromatin                             | 17735 | 60    | 2487 | 24   | 8.45    | 6.90E-07 | 2.840237 | BAZ1B;CBX2;CBX5;CBX7;CDKN2A;DNMT1;DNMT3A;FOXCl;HMGAl;INCENP;MBD1;MBD2;MECP2;MPHOSPH                      |
| blue | CC | GO:0044454 | nuclear chromosome part                     | 17735 | 255   | 2487 | 65   | 35.91   | 8.70E-07 | 1.810081 | ACTR8;ASXL1;BAZ1B;BLM;CBX5;CBX7;CTC1;DFFA;DFFB;DNMT3A;FOXCl;GATA3;HDAC1;HELB;INCENP;ING2                 |
| blue | BP | GO:0000377 | RNA splicing, via transesterification re... | 17735 | 210   | 2487 | 58   | 31.17   | 1.10E-06 | 1.860764 | AQR;CCAR1;CELF1;CPSF3;CSTF1;CSTF2;CSTF3;DBR1;DDX20;DDX23;DHX35;DHX38;DHN9;EFTUD2;EIF4A3;GE               |
| blue | BP | GO:0000398 | mRNA splicing, via spliceosome              | 17735 | 210   | 2487 | 58   | 31.17   | 1.10E-06 | 1.860764 | AQR;CCAR1;CELF1;CPSF3;CSTF1;CSTF2;CSTF3;DBR1;DDX20;DDX23;DHX35;DHX38;DHN9;EFTUD2;EIF4A3;GE               |
| blue | BP | GO:0000375 | RNA splicing, via transesterification re... | 17735 | 215   | 2487 | 59   | 31.91   | 1.10E-06 | 1.84895  | AQR;CCAR1;CELF1;CPSF3;CSTF1;CSTF2;CSTF3;DBR1;DDX20;DDX23;DHX35;DHX38;DHN9;EFTUD2;EIF4A3;GE               |
| blue | CC | GO:0015630 | microtubule cytoskeleton                    | 17735 | 853   | 2487 | 169  | 120.11  | 1.40E-06 | 1.407044 | ABCA2;ACTR10;AK5;AKAP9;ALMS1;ARL3;ATM;AXIN1;AXIN2;BBS2;BBS9;BICD1;BIRC6;BRSK2;BSN;C2C23;CAL              |
| blue | CC | GO:0071013 | catalytic step 2 spliceosome                | 17735 | 79    | 2487 | 28   | 11.12   | 1.60E-06 | 2.517986 | AQR;DDX23;DHX35;DHX38;EFTUD2;EIF4A3;GPATCH1;HNRNP2A2B1;HNRNP3A;HNRNP31;HNRNP71;HNRNP                     |
| blue | CC | GO:0016607 | nuclear speck                               | 17735 | 149   | 2487 | 43   | 20.98   | 2.00E-06 | 2.049571 | AKAP17A;APBB1;ATXN2L;CLK2;CTR9;DDX42;DDX46;DGKQ;EFTUD2;EIF4A3;EIF4ENIF1;EP400;LUC7L2;MAGO                |
| blue | MF | GO:0016874 | ligase activity                             | 17735 | 483   | 2487 | 108  | 70.27   | 2.00E-06 | 1.536929 | AARS;AARS2;ACACA;ACACB;ACLY;ACSL5;ADSS;AMFR;ANAPCS;ARIH2;ATG10;ATG3;BIRC6;BTRC;C22orf28;CA               |
| blue | MF | GO:0017111 | nucleoside-triphosphatase activity          | 17735 | 756   | 2487 | 156  | 109.99  | 2.10E-06 | 1.418311 | ABCA2;ABCB1;ABCC1;ABCC10;ABCF1;ABCF2;AFG3L2;ARL3;ATAD3C;ATP10A;ATP13A1;ATP1A1;ATP1A3;ATP                 |
| blue | MF | GO:0008134 | transcription factor binding                | 17735 | 451   | 2487 | 102  | 65.61   | 2.20E-06 | 1.554641 | ADD1;APBB1;ASXL1;BAZ1B;BCL10;BCL2;BEX1;BPTF;BRD7;CAMTA2;CAN2;CBX5;CDKN2A;CHD4;CIT4;CREG                  |
| blue | MF | GO:0019899 | enzyme binding                              | 17735 | 1084  | 2487 | 211  | 157.71  | 2.60E-06 | 1.337899 | ABL1;ADAMTS4;ADCY6;ALS2CL;ANAPCS;ANAPC7;ANKLE2;ANXA2;ARHGFE16;ARHGFE7;ATG13;ATG3;AXIN1                   |
| blue | CC | GO:0044444 | cytoplasmic part                            | 17735 | 6562  | 2487 | 1025 | 924     | 2.70E-06 | 1.109307 | AAK1;AARS;AARS2;ABCA2;ABCB1;ABCC1;ABCF1;ABL1;ABL2;ABLIM1;ACAA2;ACACA;ACACB;ACAD8;AC                      |
| blue | MF | GO:0016462 | pyrophosphatase activity                    | 17735 | 791   | 2487 | 161  | 115.08  | 3.30E-06 | 1.399027 | ABCA2;ABCB1;ABCC1;ABCC10;ABCF1;ABCF2;AFG3L2;ARL3;ATAD3C;ATP10A;ATP13A1;ATP1A1;ATP1A3;ATP                 |
| blue | MF | GO:0016817 | hydrolase activity, acting on acid anhyd... | 17735 | 797   | 2487 | 162  | 115.95  | 3.30E-06 | 1.397154 | ABCA2;ABCB1;ABCC1;ABCC10;ABCF1;ABCF2;AFG3L2;ARL3;ATAD3C;ATP10A;ATP13A1;ATP1A1;ATP1A3;ATP                 |
| blue | MF | GO:0016818 | hydrolase activity, acting on acid anhyd... | 17735 | 793   | 2487 | 161  | 115.37  | 3.80E-06 | 1.39551  | ABCA2;ABCB1;ABCC1;ABCC10;ABCF1;ABCF2;AFG3L2;ARL3;ATAD3C;ATP10A;ATP13A1;ATP1A1;ATP1A3;ATP                 |
| blue | BP | GO:0007049 | cell cycle                                  | 17735 | 1388  | 2487 | 264  | 205.99  | 4.60E-06 | 1.281616 | ABCB1;ABL1;ACTR8;ACVR1;AIF1;AKAP8;AKAP9;AKT2;ALMS1;ANAPC1;ANAPC13;ANAPCS;ANAPC7;ANK3;ANI                 |
| blue | BP | GO:0003460 | nRNA metabolic process                      | 17735 | 285   | 2487 | 71   | 42.3    | 4.70E-06 | 1.678487 | AARS;AARS2;ADAT1;C1D;C22orf28;CDK11;CDKN2A;DARS2;DDX20;DDX47;DDX51;DDX55;DIS3;DKC1;DROS                  |
| blue | BP | GO:0034645 | cellular macromolecule biosynthetic proc... | 17735 | 4170  | 2487 | 706  | 618.86  | 4.80E-06 | 1.140807 | AARS;AARS2;ABCA2;ABCF1;ABL1;ABLIM1;ACAD8;ACER2;ACTR8;ACVR1;AKAP17A;AKNA;AKT2;ALG8;ALG9;AL                |
| blue | BP | GO:0016568 | chromatin modification                      | 17735 | 434   | 2487 | 99   | 64.41   | 5.00E-06 | 1.537028 | APBB1;ARID1B;ASXL1;BAHD1;BAZ1B;BPTF;BRD1;BRD2;BRD7;BRPF1;C14orf169;CBX2;CBX7;CDKN2A;CENPN                |
| blue | CC | GO:0000785 | chromatin                                   | 17735 | 300   | 2487 | 71   | 42.24   | 5.10E-06 | 1.680871 | ACTR8;ASXL1;BAZ1B;CAPN2;CBX2;CBX5;CBX7;CCND2;CDKN2A;CTR9;DFFA;DFFB;DNMT1;DNMT3A;EXOSC10                  |
| blue | CC | GO:0031967 | organelle envelope                          | 17735 | 825   | 2487 | 161  | 116.17  | 6.40E-06 | 1.3859   | ABCF1;ABCF2;ABL1;ACAA2;ACN9;ACSL5;AFG3L2;AGK;AGPAT3;AIFM1;AIFM2;AK2;AKAP1;ALDH18A1;ALDH3                 |
| blue | BP | GO:1901576 | organic substance biosynthetic process      | 17735 | 5154  | 2487 | 855  | 764.89  | 7.00E-06 | 1.117808 | AARS;AARS2;ABCA2;ABCF1;ABL1;ABLIM1;ACAA2;ACACA;ACACB;ACAD8;ACER2;ACLY;ACN9;ACOX2;ACSL5;AC                |
| blue | BP | GO:0006310 | DNA recombination                           | 17735 | 212   | 2487 | 56   | 31.46   | 7.40E-06 | 1.780038 | ACTR8;ATM;BATF;BCL11B;BLM;CD40LG;DCLRE1C;EME2;FANI1;FEN1;FOXPl;HSPD1;IL10;IL4;IL7R;INO80;LEF1            |
| blue | CC | GO:0000228 | nuclear chromosome                          | 17735 | 294   | 2487 | 69   | 41.4    | 9.30E-06 | 1.666667 | ABCF1;ABL1;BAZ1B;BLM;CBX5;CBX7;CTC1;DFFA;DFFB;DNMT3A;FOXCl;GATA3;HMGAl;INCENP;ING2                       |
| blue | BP | GO:0000723 | telomere maintenance                        | 17735 | 65    | 2487 | 24   | 9.65    | 9.40E-06 | 2.487047 | ATM;BLM;CTC1;DCLRE1C;DKC1;FEN1;LIG1;MYC;PARP1;PINX1;POLA1;POLA2;POLE;RFC1;RPA1;RPA2;SMG6                 |
| blue | MF | GO:0003724 | RNA helicase activity                       | 17735 | 28    | 2487 | 14   | 4.07    | 9.80E-06 | 3.439803 | DDX10;DDX17;DDX18;DDX20;DDX23;DDX24;DDX56;DDX6;DHX15;DHX16;DHN9;EIF4A3;G3BP1;SUPV3L1                     |
| blue | BP | GO:0009059 | macromolecule biosynthetic process          | 17735 | 4294  | 2487 | 722  | 637.26  | 9.90E-06 | 1.132976 | AARS;AARS2;ABCA2;ABCF1;ABL1;ABLIM1;ACAD8;ACER2;ACTR8;ACVR1;AGMAT;AKAP17A;AKNA;AKT2;ALAD                  |
| blue | CC | GO:0031975 | envelope                                    | 17735 | 839   | 2487 | 162  | 118.14  | 1.10E-05 | 1.371254 | ABCF1;ABCF2;ABL1;ACAA2;ACN9;ACSL5;AFG3L2;AGK;AGPAT3;AIFM1;AIFM2;AK2;AKAP1;ALDH18A1;ALDH3                 |
| blue | BP | GO:0032200 | telomere organization                       | 17735 | 66    | 2487 | 24   | 9.79    | 1.30E-05 | 2.451481 | ATM;BLM;CTC1;DCLRE1C;DKC1;FEN1;LIG1;MYC;PARP1;PINX1;POLA1;POLA2;POLE;RPA1;RPA2;SMG6                      |
| blue | BP | GO:0000278 | mitotic cell cycle                          | 17735 | 777   | 2487 | 158  | 115.31  | 1.30E-05 | 1.370219 | ABCB1;ABL1;ACTR8;ACVR1;AIF1;AKAP8;AKAP9;ALMS1;ANAPC1;ANAPC13;ANAPCS;ANAPC7;ANKLE2;APBB1                  |
| blue | BP | GO:0044249 | cellular biosynthetic process               | 17735 | 5073  | 2487 | 840  | 752.87  | 1.30E-05 | 1.11573  | AARS;AARS2;ABCA2;ABCF1;ABL1;ABLIM1;ACACA;ACACB;ACAD8;ACER2;ACLY;ACN9;ACOX2;ACSL5;ACTR8;AC                |
| blue | BP | GO:0006354 | DNA-dependent transcription, elongation     | 17735 | 106   | 2487 | 33   | 15.73   | 1.60E-05 | 2.097902 | AXIN1;CNTN1;CTR9;ELP3;ERCC3;GTF2A2;HTATSF1;IKBKAP;LDB1;LEO1;POLR1A;POLR2B;POLR2C;POL                     |
| blue | MF | GO:0003682 | chromatin binding                           | 17735 | 327   | 2487 | 76   | 47.57   | 1.60E-05 | 1.597646 | APBB1;BAHD1;BAZ1B;BRD2;CAMTA2;CBX2;CBX5;CCNT1;CHD6;CRAMP1L;CTCF;DNAI1;DNMT3A;EP400;E2F                   |
| blue | BP | GO:0022613 | ribonucleoprotein complex biogenesis        | 17735 | 233   | 2487 | 59   | 34.58   | 1.70E-05 | 1.706189 | ATXN2L;BMS1;BMS1;C1D;CDKN2A;CELF1;CIRBP;DDX20;DDX23;DDX46;DDX56;DDX6;DKC1;DROS                           |
| blue | MF | GO:0004812 | aminoacyl-tRNA ligase activity              | 17735 | 44    | 2487 | 18   | 6.4     | 1.80E-05 | 2.8125   | AARS;AARS2;DARS2;EARS2;EPRS;FARSB;GARS;HARS;IARS;IARS2;KARS;LARS;LARS2;MARS;NARS;SARS;TARS               |
| blue | MF | GO:0016875 | ligase activity, forming carbon-oxygen b... | 17735 | 44    | 2487 | 18   | 6.4     | 1.80E-05 | 2.8125   | AARS;AARS2;DARS2;EARS2;EPRS;FARSB;GARS;HARS;IARS;IARS2;KARS;LARS;LARS2;MARS;NARS;SARS;TARS               |
| blue | MF | GO:0016876 | ligase activity, forming aminoacyl-tRNA ... | 17735 | 44    | 2487 | 18   | 6.4     | 1.80E-05 | 2.8125   | AARS;AARS2;DARS2;EARS2;EPRS;FARSB;GARS;HARS;IARS;IARS2;KARS;LARS;LARS2;MARS;NARS;SARS;TARS               |

|      |    |             |                                              |       |      |      |     |        |          |          |                                                                                                  |
|------|----|-------------|----------------------------------------------|-------|------|------|-----|--------|----------|----------|--------------------------------------------------------------------------------------------------|
| blue | MF | GO:0042393  | histone binding                              | 17735 | 104  | 2487 | 32  | 15.13  | 1.80E-05 | 2.115003 | APBB1;BAZ1B;BRD1;BRD2;BRD7;CBX2;CBX5;CBX7;ING1;ING2;ING5;IPO9;KDM4A;L3MBTL1;L3MBTL2;LEF1;N       |
| blue | BP | GO:0022402  | cell cycle process                           | 17735 | 1059 | 2487 | 205 | 157.16 | 1.90E-05 | 1.304403 | ABCB1;ABL1;ACTR8;ACVR1;AIF1;AKAP8;AKAP9;AKT2;ALM51;ANAC1;ANAPC13;ANAPC5;ANAPC7;ANK3;ANI          |
| blue | BP | GO:0009058  | biosynthetic process                         | 17735 | 5219 | 2487 | 860 | 774.54 | 2.00E-05 | 1.110336 | AARS;AARS2;ABCA2;ABCF1;ABL1;ABLIM1;ACAA2;ACACA;ACACB;ACAD8;ACER2;ACLY;ACN9;ANAC2;ACSL5;AC        |
| blue | BP | GO:0007163  | establishment or maintenance of cell pol...  | 17735 | 113  | 2487 | 34  | 16.77  | 2.60E-05 | 2.02743  | AMOTL1;SNA1;BRSK2;CCR7;CDC42BPB;CDK5RAP2;CKAP5;CYTH1;CYTH3;DOCK7;DST;DYLL1;E2F;E2F7;FBF          |
| blue | MF | GO:0008094  | DNA-dependent ATPase activity                | 17735 | 70   | 2487 | 24  | 10.18  | 2.80E-05 | 2.357564 | BLM;BPTF;CHD1L;CHD2;CHD3;CHD4;DHX9;ERCC3;FBXO18;G3BP1;HELB;MCM4;MCM6;MSH6;MYO18A;RAD             |
| blue | BP | GO:0006200  | ATP catabolic process                        | 17735 | 73   | 2487 | 25  | 10.83  | 2.80E-05 | 2.308403 | ABCA2;ABCC1;ACLY;ATP5A1;ATP5B;ATP5J;ATP5J2;ATP6V1H;ATP8B1;ATP8B2;BLM;CARN3;C11;HSPD1;JAD         |
| blue | MF | GO:0043167  | ion binding                                  | 17735 | 5761 | 2487 | 923 | 838.14 | 3.30E-05 | 1.101248 | AAK1;AARS;AARS2;ABCA2;ABCB1;ABCC1;ABCC10;ABCF1;ABCF2;ABL1;ABL2;ABLIM1;ACACA;ACACB;ACAD8;A        |
| blue | BP | GO:0032862  | activation of Rho GTPase activity            | 17735 | 20   | 2487 | 11  | 2.97   | 3.40E-05 | 3.703704 | ARHGFE16;CCR7;DOCK7;EPHA1;EPHA2;FOXJ1;SCRIB;SYDE1;TAX1BP3;TBC1D7;TSC1                            |
| blue | CC | GO:0005657  | replication fork                             | 17735 | 47   | 2487 | 18  | 6.62   | 3.40E-05 | 2.719033 | BAZ1B;BLM;DNMT1;HELB;MCM3;POLA1;POLA2;POLE;POLE3;RAD18;RFC1;RPA1;RPA2;TP53;TP53BP1;UBE2E         |
| blue | MF | GO:0003678  | DNA helicase activity                        | 17735 | 42   | 2487 | 17  | 6.11   | 3.70E-05 | 2.782324 | BLM;CHD1L;CHD2;CHD3;CHD4;DHX9;ERCC3;FBXO18;G3BP1;HELB;INO80;MCM4;MCM6;RUVBL1;SUPV3L1;X           |
| blue | CC | GO:0005874  | microtubule                                  | 17735 | 329  | 2487 | 73  | 46.33  | 4.00E-05 | 1.575653 | ARL3;AXIN1;AXIN2;BICD1;CALM3;CAMSAP1;CCT3;CCT5;CCT6A;CCT7;CCT8;CDC16;CDK5RAP2;CKAP5;DCTN1        |
| blue | BP | GO:0006403  | RNA localization                             | 17735 | 139  | 2487 | 39  | 20.63  | 4.10E-05 | 1.890451 | BICD1;CKAP5;CPSF3;DDX19A;DDX19B;DHX38;EIF4A3;EIF5A;EXOSC10;GLE1;HHEX;HNRNP2A21;KHDRBS1;KH        |
| blue | BP | GO:0006338  | chromatin remodeling                         | 17735 | 97   | 2487 | 30  | 14.4   | 4.30E-05 | 2.083333 | ARID1B;BAHD1;BAZ1B;BPTF;CDKN2A;CENPN;CENPO;CHD1L;CHD6;HDAC1;HMGA1;INO80;MLL4;MYC;NASP;           |
| blue | CC | GO:0000790  | nuclear chromatin                            | 17735 | 152  | 2487 | 40  | 21.4   | 4.90E-05 | 1.869159 | ACTR8;ASXL1;CBX5;CBX7;DFFA;DFFB;DNMT3A;FOXK1;GATA3;HDAC1;ING2;INO80;KDM1A;KDM4C;LDB1;MF          |
| blue | BP | GO:0006325  | chromatin organization                       | 17735 | 531  | 2487 | 112 | 78.8   | 5.00E-05 | 1.42132  | APBB1;ARID1B;ASXL1;BAHD1;BAZ1B;BPTF;BRD1;BRD2;BRD7;BRPF1;C14orf169;CBX2;CBX7;CDAN1;CDKN2A;       |
| blue | CC | GO:0044229  | mitochondrial part                           | 17735 | 740  | 2487 | 142 | 104.2  | 5.30E-05 | 1.362764 | ACAA2;ACAD8;ACN9;ACO2;ACSL5;AFG3L2;AGK;AIFM1;AIFM2;AK2;AKL2;ALDH18A1;ALDH18A1;ALDH18A1;ALD       |
| blue | BP | GO:0060255  | regulation of macromolecule metabolic pr...  | 17735 | 4178 | 2487 | 696 | 620.05 | 5.80E-05 | 1.12249  | AAK1;ABCA2;ABCF1;ABL1;ABLIM1;ACAD8;ACE;ACER2;ACTR8;ACVR1;ADCY3;ADCY6;ADCY7;ADCY9;ADD1;AK         |
| blue | BP | GO:0006281  | DNA repair                                   | 17735 | 388  | 2487 | 86  | 57.58  | 6.20E-05 | 1.493574 | ABL1;ACTR8;APBB1;ATM;AXIN2;BAZ1B;BLM;CEP164;CHD1L;CHEK2;GINP;CSNK1E;CUL4A;DCLE1C;DDB1;AC         |
| blue | MF | GO:0003824  | catalytic activity                           | 17735 | 5264 | 2487 | 846 | 765.83 | 6.30E-05 | 1.104684 | AAK1;AARS;AARS2;ABCA2;ABCF2;ABCF3;ABCC1;ABCC10;ABCF1;ABCF2;ABHD15;ABHD6;ABL1;ABL2;ACAA2;ACAD8    |
| blue | MF | GO:0004003  | ATP-dependent DNA helicase activity          | 17735 | 32   | 2487 | 14  | 4.66   | 6.50E-05 | 3.004292 | BLM;CHD1L;CHD2;CHD3;CHD4;DHX9;ERCC3;FBXO18;G3BP1;HELB;MCM4;MCM6;XRCC5;XRCC6                      |
| blue | BP | GO:0005657  | nucleic acid transport                       | 17735 | 132  | 2487 | 37  | 19.59  | 6.50E-05 | 1.888719 | CKAP5;CPSF3;DDX19A;DDX19B;DHX38;EIF4A3;EIF5A;GLE1;HHEX;HNRNP2A21;KHDRBS1;KHSRP;KIF5C;MAGC        |
| blue | BP | GO:0005658  | RNA transport                                | 17735 | 132  | 2487 | 37  | 19.59  | 6.50E-05 | 1.888719 | CKAP5;CPSF3;DDX19A;DDX19B;DHX38;EIF4A3;EIF5A;GLE1;HHEX;HNRNP2A21;KHDRBS1;KHSRP;KIF5C;MAGC        |
| blue | BP | GO:0051236  | establishment of RNA localization            | 17735 | 132  | 2487 | 37  | 19.59  | 6.50E-05 | 1.888719 | CKAP5;CPSF3;DDX19A;DDX19B;DHX38;EIF4A3;EIF5A;GLE1;HHEX;HNRNP2A21;KHDRBS1;KHSRP;KIF5C;MAGC        |
| blue | BP | GO:0043038  | amino acid activation                        | 17735 | 51   | 2487 | 19  | 7.57   | 6.80E-05 | 2.509908 | AARS;AARS2;DARS2;EARS2;EPRS;FARS8;GARS;HARS;IARS;IARS2;KARS;LARS;LARS2;MARS;NARS;NARS;PET112;SAR |
| blue | BP | GO:0043039  | tRNA aminoacylation                          | 17735 | 51   | 2487 | 19  | 7.57   | 6.80E-05 | 2.509908 | AARS;AARS2;DARS2;EARS2;EPRS;FARS8;GARS;HARS;IARS;IARS2;KARS;LARS;LARS2;MARS;NARS;NARS;PET112;SAR |
| blue | BP | GO:0014840  | cellular component organization or bioge...  | 17735 | 4237 | 2487 | 704 | 628.8  | 7.20E-05 | 1.119593 | AAK1;AARS2;ABL1;ABL2;ABLIM1;ACACA;ACACB;ACTR8;ADD1;AFG3L2;AIF1;AIFM1;AIFM2;AKAP8;AKT2;AKT3       |
| blue | MF | GO:0003677  | DNA binding                                  | 17735 | 2332 | 2487 | 400 | 339.27 | 7.80E-05 | 1.179002 | ABL1;AHD1;AIFM1;AIFM2;AKAP8;AKNA;ALX3;ARHGAP35;ARID1B;ARNTL2;ASXL1;ATF6B;ATM;ATXN1L;BAC          |
| blue | BP | GO:0034470  | ncRNA processing                             | 17735 | 198  | 2487 | 50  | 29.38  | 7.90E-05 | 1.701838 | AARS;ADAT1;C1D;C22orf28;CDKAL1;CDKN2A;DDX47;DDX51;DDX56;DKC1;DROSHA;EIF4A3;EXOSC10;FTSJ2;F       |
| blue | BP | GO:0006418  | tRNA aminoacylation for protein translat...  | 17735 | 48   | 2487 | 18  | 7.12   | 9.50E-05 | 2.52809  | AARS;AARS2;DARS2;EARS2;EPRS;FARS8;GARS;HARS;IARS;IARS2;KARS;LARS;LARS2;MARS;NARS;NARS;TARS;Y     |
| blue | CC | GO:0000428  | DNA-directed RNA polymerase complex          | 17735 | 101  | 2487 | 29  | 14.22  | 9.80E-05 | 2.039381 | CD3EAP;CTR9;ELP3;ERCC3;ERCC5;GTF2A2;IKBKAP;INTS1;INTS4;INTS7;INTS9;LEO1;MMS19;POLR1A;POLR1B;     |
| blue | CC | GO:0055029  | nuclear DNA-directed RNA polymerase comp...  | 17735 | 101  | 2487 | 29  | 14.22  | 9.80E-05 | 2.039381 | CD3EAP;CTR9;ELP3;ERCC3;ERCC5;GTF2A2;IKBKAP;INTS1;INTS4;INTS7;INTS9;LEO1;MMS19;POLR1A;POLR1B;     |
| blue | MF | GO:0005083  | small GTPase regulator activity              | 17735 | 295  | 2487 | 67  | 42.92  | 1.00E-04 | 1.561004 | AGAP5;AGAP6;ALS2CL;ARHGAP15;ARHGAP29;ARHGAP35;ARHGAP35;ARHGAP35;ARHGAP35;ARHGAP35;ARHGAP35;ARH   |
| blue | BP | GO:0002200  | somatic diversification of immune recept...  | 17735 | 53   | 2487 | 19  | 7.87   | 0.00012  | 2.414231 | BATF;BCL11B;CD40LG;CTNBL1;FOXP1;HSPD1;IL10;IL4;LEF1;MLH1;MSH6;PAXIP1;PMS2;PMS2P5;RNF8;TCF        |
| blue | CC | GO:0030880  | RNA polymerase complex                       | 17735 | 102  | 2487 | 29  | 14.36  | 0.00012  | 2.019499 | CD3EAP;CTR9;ELP3;ERCC3;ERCC5;GTF2A2;IKBKAP;INTS1;INTS4;INTS7;INTS9;LEO1;MMS19;POLR1A;POLR1B;     |
| blue | CC | GO:0018130  | heterocycle biosynthetic process             | 17735 | 3650 | 2487 | 611 | 541.69 | 0.00012  | 1.127951 | ABCA2;ABL1;ABLIM1;ACACA;ACACB;ACAD8;ACTR8;ACVR1;ADCY6;ADCY7;ADSS;AK2;AKS;AKAP17A;AKNA;AL         |
| blue | BP | GO:0015030  | Cajal body                                   | 17735 | 47   | 2487 | 17  | 6.62   | 0.00013  | 2.567976 | AKS18;DDX20;DDX47;DDX51;DDX56;DKC1;EFTUD2;GAR1;GEMIN4;GEMIN5;LSG1;LSM10;NOL1;NOP10;PRPF3;PR      |
| blue | BP | GO:0042254  | ribosome biogenesis                          | 17735 | 151  | 2487 | 40  | 22.41  | 0.00013  | 1.784917 | BMS1;C10;CDKN2A;DDX47;DDX51;DDX56;DKC1;DROSHA;EFTUD1;EIF4A3;EXOSC10;FTSJ2;FTSJ3;GAR1;GEMI        |
| blue | BP | GO:0022403  | cell cycle phase                             | 17735 | 852  | 2487 | 165 | 126.44 | 0.00013  | 1.304967 | ABCB1;ABL1;ACTR8;ACVR1;AIF1;AKAP8;AKAP9;ALM51;ANAPC1;ANAPC13;ANAPC5;ANAPC7;ANKLE2;APBB1;         |
| blue | BP | GO:0019219  | regulation of nucleobase-containing comp...  | 17735 | 3414 | 2487 | 574 | 506.66 | 0.00014  | 1.13291  | ABCA2;ABL1;ABLIM1;ACAD8;ACTR8;ACVR1;ADCY7;ADD1;AGAP5;AGAP6;AHS1A;AKAP17A;AKNA;AKT2;APBB          |
| blue | BP | GO:0046112  | nucleobase biosynthetic process              | 17735 | 13   | 2487 | 8   | 1.93   | 0.00015  | 4.145078 | CAD;CECR1;DHODH;GART;GMP5;PAICS;PRPS1;SHMT1                                                      |
| blue | BP | GO:0006337  | nucleosome disassembly                       | 17735 | 16   | 2487 | 9   | 2.37   | 0.00015  | 3.797468 | BAZ1B;HMGA1;SMARCA4;SMARCC1;SMARCC2;SMARCD1;SMARCD3;SMARCE1;SUPT16H                              |
| blue | BP | GO:0031498  | chromatin disassembly                        | 17735 | 16   | 2487 | 9   | 2.37   | 0.00015  | 3.797468 | BAZ1B;HMGA1;SMARCA4;SMARCC1;SMARCC2;SMARCD1;SMARCD3;SMARCE1;SUPT16H                              |
| blue | BP | GO:0032986  | protein-DNA complex disassembly              | 17735 | 16   | 2487 | 9   | 2.37   | 0.00015  | 3.797468 | BAZ1B;HMGA1;SMARCA4;SMARCC1;SMARCC2;SMARCD1;SMARCD3;SMARCE1;SUPT16H                              |
| blue | MF | GO:0035064  | methylated histone residue binding           | 17735 | 38   | 2487 | 15  | 5.53   | 0.00015  | 2.712477 | CBX5;CBX7;ING1;ING2;ING5;KDM4A;L3MBTL1;L3MBTL2;MPHOSPH8;NCAPD3;NCAPG2;PHF13;TP53BP               |
| blue | BP | GO:0051325  | interphase                                   | 17735 | 414  | 2487 | 89  | 61.44  | 0.00015  | 1.448568 | ABCB1;ABL1;ACVR1;AIF1;AKAP9;ALM51;ANAPC5;APBB1;ATM;BCL2;BLM;BRD7;BRSK2;CASP2;CCND1;CD            |
| blue | BP | GO:0006984  | ER-nucleus signaling pathway                 | 17735 | 99   | 2487 | 29  | 14.69  | 0.00017  | 1.974132 | AARS;ADD1;AMFR;ATG10;ATP2A2;CALR;CCND1;CUL7;DCTN1;DDIT3;DERL2;EDEM1;EIF2AK3;EIF2AK4;GOSR2        |
| blue | MF | GO:0006589  | nucleoside-triphosphatase regulator acti...  | 17735 | 447  | 2487 | 93  | 65.03  | 0.00017  | 1.430109 | AGAP5;AGAP6;AHS1A;ALS2CL;ANKRD27;ARHGAP15;ARHGAP17;ARHGAP18;ARHGAP29;ARHGAP32;ARHGAF             |
| blue | CC | GO:0016581  | NuRD complex                                 | 17735 | 17   | 2487 | 9   | 2.39   | 0.00018  | 3.76569  | CHD3;CHD4;HDAC1;MTA1;MTA2;MTA3;RBBP4;RBBP7;SALL2                                                 |
| blue | CC | GO:00090545 | CHD-type complex                             | 17735 | 17   | 2487 | 9   | 2.39   | 0.00018  | 3.76569  | CHD3;CHD4;HDAC1;MTA1;MTA2;MTA3;RBBP4;RBBP7;SALL2                                                 |
| blue | BP | GO:0044271  | cellular nitrogen compound biosynthetic ...  | 17735 | 3726 | 2487 | 621 | 552.97 | 0.00018  | 1.123027 | ABCA2;ABL1;ABLIM1;ACACA;ACACB;ACAD8;ACER2;ACTR8;ACVR1;ADCY6;ADCY7;ADSS;AGMAT;AK2;AK5;AK          |
| blue | BP | GO:0034976  | response to endoplasmic reticulum stress     | 17735 | 114  | 2487 | 32  | 16.92  | 0.00019  | 1.891253 | AARS;ADD1;AIFM1;AMFR;ATG10;BCL2;BRSK2;CALR;CCND1;CREB3L2;CUL7;DCTN1;DDIT3;DERL2;EDEM1;EIF        |
| blue | BP | GO:0009056  | catabolic process                            | 17735 | 1989 | 2487 | 349 | 295.18 | 0.00019  | 1.182329 | ABCA2;ABCC1;ABL1;ABL2;ACAD8;ACE;ACLY;ACOX2;ACOX3;ADPGK;ADSS;AFG3L2;AGAP5;AGAP6;AHS1A;AIF         |
| blue | MF | GO:0070491  | repressing transcription factor binding      | 17735 | 43   | 2487 | 16  | 6.26   | 2.00E-04 | 2.555911 | CBX5;CHD4;GTF2A2;HDAC1;HHEX;MTA1;MTA2;MYC;PPARA;RELA;RUNX1;RUNX2;TBP;TCF3;TCF7L2;ZMYND           |
| blue | BP | GO:0046034  | ATP metabolic process                        | 17735 | 124  | 2487 | 34  | 18.4   | 2.00E-04 | 1.847826 | ABCA2;ABCC1;ACLY;AK2;AK5;ATP1A1;ATP1A3;ATP2A2;ATP2A3;ATP5A1;ATP5B;ATP5J;ATP5J2;ATP6V1H;ATP       |
| blue | CC | GO:0080090  | regulation of primary metabolic process      | 17735 | 4337 | 2487 | 714 | 643.65 | 2.00E-04 | 1.109299 | ABCA2;ABCF1;ABL1;ABLIM1;ACACB;ACAD8;ACE;ACER2;ACN9;ACTR8;ACVR1;ADCY3;ADCY6;ADCY7;ADCY9;A         |
| blue | CC | GO:0071564  | npBAF complex                                | 17735 | 11   | 2487 | 7   | 1.55   | 0.00021  | 4.516129 | PHF10;SMARCA4;SMARCC1;SMARCC2;SMARCD1;SMARCC3;SMARCE1                                            |
| blue | BP | GO:0015931  | nucleobase-containing compound transport     | 17735 | 154  | 2487 | 40  | 22.85  | 0.00021  | 1.750547 | CKAP5;CPSF3;DDX19A;DDX19B;DHX38;EIF4A3;EIF5A;GLE1;HHEX;HNRNP2A21;KHDRBS1;KHSRP;KIF5C;MAGC        |
| blue | BP | GO:0016071  | mRNA metabolic process                       | 17735 | 607  | 2487 | 122 | 90.08  | 0.00021  | 1.354352 | AKAP17A;AQR;ATM;CCAR1;CELF1;CNOT10;CPSF3;CSTF1;CSTF2;CSTF3;CTNBL1;DBR1;DCP1B;DDX20;DDX23         |
| blue | BP | GO:0006351  | transcription, DNA-dependent                 | 17735 | 3208 | 2487 | 540 | 476.09 | 0.00021  | 1.134239 | ABCA2;ABL1;ABLIM1;ACAD8;ACTR8;ACVR1;AKAP17A;AKNA;ALX3;APBB1;ARHGAP35;ARID1B;ARNTL2;ASCC1         |
| blue | BP | GO:0051329  | interphase of mitotic cell cycle             | 17735 | 408  | 2487 | 87  | 60.55  | 0.00023  | 1.436829 | ABCB1;ABL1;ACVR1;AIF1;AKAP9;ALM51;ANAPC5;APBB1;ATM;BCL2;BLM;BRD7;BRSK2;CASP2;CCND1;CD            |
| blue | BP | GO:0045786  | negative regulation of cell cycle            | 17735 | 453  | 2487 | 95  | 67.23  | 0.00023  | 1.41306  | AKT2;ANAPC5;ANAPC7;APBB1;ATM;BCL2;BLM;BMP2;C1orf82;CALR;CAPN3;CASP2;CCND1;CD16                   |
| blue | CC | GO:0030529  | ribonucleoprotein complex                    | 17735 | 573  | 2487 | 111 | 80.68  | 0.00023  | 1.375806 | ABCF1;AKAP17A;APOBEC3F;AQR;ATXN2L;BTBD2;CALR;CELF1;CRBP;CPSF3;CSNK1E;CTNBL1;DDX20;DDX23          |
| blue | BP | GO:0034620  | cellular response to unfolded protein        | 17735 | 87   | 2487 | 26  | 12.91  | 0.00025  | 2.013943 | AARS;ADD1;AMFR;CALR;CCND1;CUL7;DCTN1;DDIT3;DERL2;EDEM1;EIF2AK3;EIF2AK4;GOSR2;HSP90B1;HYK         |
| blue | BP | GO:1901362  | organic cyclic compound biosynthetic pro...  | 17735 | 3752 | 2487 | 623 | 556.83 | 0.00026  | 1.118833 | ABCA2;ABL1;ABLIM1;ACAA2;ACACA;ACACB;ACAD8;ACOX2;ACTR8;ACVR1;ADCY6;ADCY7;ADSS;AK2;AK5;AK          |
| blue | BP | GO:0035203  | regulation of Rho protein signal transdu...  | 17735 | 166  | 2487 | 42  | 24.64  | 0.00027  | 1.704545 | ALS2CL;ARHGAP15;ARHGAP29;ARHGAP35;ARHGFE1;ARHGFE18;ARHGFE18;ARHGFE18;ARHGFE18;ARHGFE18;ARHGFE18  |
| blue | BP | GO:0051345  | positive regulation of hydrolase activiti... | 17735 | 450  | 2487 | 94  | 66.78  | 0.00028  | 1.407607 | ACER2;ADCY6;ADCY7;ADCY9;ADD1;AHS1A;AIFM1;AKT2;ARHGAP15;ARHGAP15;ARHGAP15;ARHGAP15;ARHGFE1        |
| blue | BP | GO:0019438  | aromatic compound biosynthetic process       | 17735 | 3638 | 2487 | 605 | 539.91 | 0.00028  | 1.120557 | ABCA2;ABL1;ABLIM1;ACACA;ACACB;ACAD8;ACTR8;ACVR1;ADCY6;ADCY7;ADSS;AK2;AK5;AKAP17A;AKNA;AL         |
| blue | BP | GO:0031060  | regulation of histone methylation            | 17735 | 24   | 2487 | 11  | 3.56   | 0.00029  | 3.089888 | CTCF;CTR9;DNMT1;GATA3;KDM1A;MECP2;MLL4;PAXIP1;PYGO2;RNF20;SNW1                                   |
| blue | CC | GO:0005759  | mitochondrial matrix                         | 17735 | 286  | 2487 | 62  | 40.27  | 0.00029  | 1.539608 | ACAD8;ACO2;ALDH18A1;ALDH5A1;ALDH6A1;ALDH6A1;ATP5A1;ATP5B;BDH1;BLOC1S1;D2HGDH;DARS2;DL            |

|      |    |             |                                             |       |      |      |     |        |          |          |                                                                                                                                                                                                                                                                                                                                                                                                                                                                                                                                                                                                                                                                                                                                                                                                       |
|------|----|-------------|---------------------------------------------|-------|------|------|-----|--------|----------|----------|-------------------------------------------------------------------------------------------------------------------------------------------------------------------------------------------------------------------------------------------------------------------------------------------------------------------------------------------------------------------------------------------------------------------------------------------------------------------------------------------------------------------------------------------------------------------------------------------------------------------------------------------------------------------------------------------------------------------------------------------------------------------------------------------------------|
| blue | MF | GO:0030695  | GTPase regulator activity                   | 17735 | 436  | 2487 | 90  | 63.43  | 0.00029  | 1.418887 | AGAP5;AGAP6;ALS2CL;ANKRD27;ARHGAP15;ARHGAP17;ARHGAP18;ARHGAP29;ARHGAP32;ARHGAP33;ARHGAP34;ARHGAP35;ARHGAP36;ARHGAP37;ARHGAP38;ARHGAP39;ARHGAP40;ARHGAP41;ARHGAP42;ARHGAP43;ARHGAP44;ARHGAP45;ARHGAP46;ARHGAP47;ARHGAP48;ARHGAP49;ARHGAP50;ARHGAP51;ARHGAP52;ARHGAP53;ARHGAP54;ARHGAP55;ARHGAP56;ARHGAP57;ARHGAP58;ARHGAP59;ARHGAP60;ARHGAP61;ARHGAP62;ARHGAP63;ARHGAP64;ARHGAP65;ARHGAP66;ARHGAP67;ARHGAP68;ARHGAP69;ARHGAP70;ARHGAP71;ARHGAP72;ARHGAP73;ARHGAP74;ARHGAP75;ARHGAP76;ARHGAP77;ARHGAP78;ARHGAP79;ARHGAP80;ARHGAP81;ARHGAP82;ARHGAP83;ARHGAP84;ARHGAP85;ARHGAP86;ARHGAP87;ARHGAP88;ARHGAP89;ARHGAP90;ARHGAP91;ARHGAP92;ARHGAP93;ARHGAP94;ARHGAP95;ARHGAP96;ARHGAP97;ARHGAP98;ARHGAP99;ARHGAP100                                                                                          |
| blue | BP | GO:0010468  | regulation of gene expression               | 17735 | 3347 | 2487 | 560 | 496.72 | 0.00029  | 1.127396 | AAK1;ABC2A;ABCF1;ABL1;ABLIM1;ACAD8;ACR28;ACVR1;AKAP17A;AKNA;AKT2;ANK3;APBA1;APBA2;APBB1;APBB2;APBB3;APBB4;APBB5;APBB6;APBB7;APBB8;APBB9;APBB10;APBB11;APBB12;APBB13;APBB14;APBB15;APBB16;APBB17;APBB18;APBB19;APBB20;APBB21;APBB22;APBB23;APBB24;APBB25;APBB26;APBB27;APBB28;APBB29;APBB30;APBB31;APBB32;APBB33;APBB34;APBB35;APBB36;APBB37;APBB38;APBB39;APBB40;APBB41;APBB42;APBB43;APBB44;APBB45;APBB46;APBB47;APBB48;APBB49;APBB50;APBB51;APBB52;APBB53;APBB54;APBB55;APBB56;APBB57;APBB58;APBB59;APBB60;APBB61;APBB62;APBB63;APBB64;APBB65;APBB66;APBB67;APBB68;APBB69;APBB70;APBB71;APBB72;APBB73;APBB74;APBB75;APBB76;APBB77;APBB78;APBB79;APBB80;APBB81;APBB82;APBB83;APBB84;APBB85;APBB86;APBB87;APBB88;APBB89;APBB90;APBB91;APBB92;APBB93;APBB94;APBB95;APBB96;APBB97;APBB98;APBB99;APBB100 |
| blue | BP | GO:0032856  | activation of Ras GTPase activity           | 17735 | 28   | 2487 | 12  | 4.16   | 0.00033  | 2.884615 | AKT2;ARHGEF16;CCR7;DOCK7;EPAHA1;EPHA2;FOXJ1;SCRIB;SYDE1;TAX1BP3;TBC1D7;TSC1                                                                                                                                                                                                                                                                                                                                                                                                                                                                                                                                                                                                                                                                                                                           |
| blue | BP | GO:00042562 | somatic diversification of immune recept... | 17735 | 48   | 2487 | 17  | 7.12   | 0.00033  | 2.38764  | BATF;BCL11B;CD40LG;FOXP1;HSPD1;IL10;IL4;LEF1;MLH1;MSH6;PAXIP1;PMS2;RNF8;TCF3;TCF7;UNG;XRCC6                                                                                                                                                                                                                                                                                                                                                                                                                                                                                                                                                                                                                                                                                                           |
| blue | BP | GO:0016444  | somatic cell DNA recombination              | 17735 | 48   | 2487 | 17  | 7.12   | 0.00033  | 2.38764  | BATF;BCL11B;CD40LG;FOXP1;HSPD1;IL10;IL4;LEF1;MLH1;MSH6;PAXIP1;PMS2;RNF8;TCF3;TCF7;UNG;XRCC6                                                                                                                                                                                                                                                                                                                                                                                                                                                                                                                                                                                                                                                                                                           |
| blue | BP | GO:0019222  | regulation of metabolic process             | 17735 | 4834 | 2487 | 787 | 717.4  | 0.00033  | 1.097017 | AAK1;ABC2A;ABCF1;ABL1;ABL2;ABLIM1;ACACA;ACACB;ACAD8;ACE;ACER2;ACLY;ACN9;ACTR8;ACV1;ADOCY                                                                                                                                                                                                                                                                                                                                                                                                                                                                                                                                                                                                                                                                                                              |
| blue | BP | GO:0051171  | regulation of nitrogen compound metaboli... | 17735 | 3496 | 2487 | 582 | 518.83 | 0.00035  | 1.121755 | ABCA2;ABL1;ABLIM1;ACAD8;ACR28;ACVR1;ADCY7;ADD1;AGAP5;AGAP6;AHS1A;AKAP17A;AKNA;AKT2;APBB                                                                                                                                                                                                                                                                                                                                                                                                                                                                                                                                                                                                                                                                                                               |
| blue | MF | GO:0016879  | ligase activity, forming carbon-nitrogen... | 17735 | 330  | 2487 | 71  | 48.01  | 0.00036  | 1.478859 | ACACA;ACACB;ADSS;AMFR;ANAPCS;ARIH2;ATG10;ATG3;BIRC6;BTRC;CAD;CARNS1;CBLB;CTPS2;DTL;FBXO21                                                                                                                                                                                                                                                                                                                                                                                                                                                                                                                                                                                                                                                                                                             |
| blue | BP | GO:0044248  | cellular catabolic process                  | 17735 | 1692 | 2487 | 299 | 251.11 | 0.00036  | 1.190713 | ABCA2;ABCF1;ABL1;ABL2;ACAD8;ACE;ACLY;ACOX2;ACOX3;ADSS;AGAP5;AGAP6;AHS1A;AIFM1;AKT2;ALDH5                                                                                                                                                                                                                                                                                                                                                                                                                                                                                                                                                                                                                                                                                                              |
| blue | CC | GO:0005819  | spindle                                     | 17735 | 232  | 2487 | 52  | 32.67  | 0.00037  | 1.591674 | ALMS1;ARL3;ATM;BIRC6;CALM3;CDC16;CDC25B;CDK5RAP2;CEP85;CEP89;C10orf169;C11orf119;C12orf119                                                                                                                                                                                                                                                                                                                                                                                                                                                                                                                                                                                                                                                                                                            |
| blue | CC | GO:0016514  | SWI/SNF complex                             | 17735 | 15   | 2487 | 8   | 2.11   | 0.00039  | 3.791469 | ARID18;NCR1;SMARCA4;SMARCC1;SMARCC2;SMARCD1;SMARCD3;SMARCE1                                                                                                                                                                                                                                                                                                                                                                                                                                                                                                                                                                                                                                                                                                                                           |
| blue | BP | GO:0006986  | response to unfolded protein                | 17735 | 133  | 2487 | 35  | 19.74  | 0.00039  | 1.77305  | AARS;ADD1;AMFR;ATF6B;CALR;CCND1;CREB3L2;CUL7;DCTN1;DDIT3;DERL2;DNAJB1;EDEMI1;EIF2AK3;EIF2AI                                                                                                                                                                                                                                                                                                                                                                                                                                                                                                                                                                                                                                                                                                           |
| blue | CC | GO:0019867  | outer membrane                              | 17735 | 145  | 2487 | 36  | 20.42  | 0.00039  | 1.762977 | ACLS5;AIFM2;AKAP1;ANKH;BAD;BCL2;BID;BR13BP;CYB5B;DHC7;EMD;GUCY2D;HADHB;ITPR3;MAVS;MGST1                                                                                                                                                                                                                                                                                                                                                                                                                                                                                                                                                                                                                                                                                                               |
| blue | MF | GO:0003712  | transcription cofactor activity             | 17735 | 475  | 2487 | 96  | 69.11  | 4.00E-04 | 1.38909  | ARHGAP35;ARID18;ASXL1;ATN1;BATF3;BCL10;BCL9L;BRD7;C1D;CBFA2T2;CCAR1;CITA;CREG1;CREM;CRCT1                                                                                                                                                                                                                                                                                                                                                                                                                                                                                                                                                                                                                                                                                                             |
| blue | CC | GO:0016363  | nuclear matrix                              | 17735 | 84   | 2487 | 24  | 11.83  | 0.00041  | 2.02874  | AKAP8;ATN1;BLM;CAD;DNMT3A;HLCS;HNRNP;KIF4A;MBD1;NONO;NUMA1;PAP1;POLA1;PSPC1;RUVBL1                                                                                                                                                                                                                                                                                                                                                                                                                                                                                                                                                                                                                                                                                                                    |
| blue | CC | GO:0031461  | cullin-RING ubiquitin ligase complex        | 17735 | 89   | 2487 | 25  | 12.53  | 0.00042  | 1.995211 | ANAPC1;ANAPC13;ANAPCS;ANAPC7;BTRC;CCNF;C16orf119;C17orf119;C18orf119;C19orf119;C20orf119                                                                                                                                                                                                                                                                                                                                                                                                                                                                                                                                                                                                                                                                                                              |
| blue | BP | GO:0045058  | T cell selection                            | 17735 | 25   | 2487 | 11  | 3.71   | 0.00044  | 2.96496  | BCL11B;BCL2;CARD11;CCR7;CD3E;CD4;CD74;GATA3;ITPKB;MINK1;SPN                                                                                                                                                                                                                                                                                                                                                                                                                                                                                                                                                                                                                                                                                                                                           |
| blue | BP | GO:0051028  | mRNA transport                              | 17735 | 114  | 2487 | 31  | 16.92  | 0.00044  | 1.832151 | CPSEF3;DDX19A;DDX19B;DXH38;EIF4A3;EIF5A;GLE1;HHEX;KHSRP;KIF5C;MAGO;MYO1C;NUP133;NUP155;N                                                                                                                                                                                                                                                                                                                                                                                                                                                                                                                                                                                                                                                                                                              |
| blue | CC | GO:0005635  | nuclear envelope                            | 17735 | 314  | 2487 | 66  | 44.21  | 0.00046  | 1.492875 | ABCF1;ABL1;AGPAT3;ANKLE2;ATP2A3;BCL2;CBX5;CCND2;CLIC1;DDX19A;DDX19B;DGKH;DHC7;DNAJC1;DN                                                                                                                                                                                                                                                                                                                                                                                                                                                                                                                                                                                                                                                                                                               |
| blue | BP | GO:0034654  | nucleobase-containing compound biosynt...   | 17735 | 3583 | 2487 | 594 | 531.75 | 0.00046  | 1.117066 | ABCA2;ABL1;ABLIM1;ACACA;ACACB;ACAD8;ACR28;ACVR1;ADCY6;ADCY7;ADSS;AK2;AK3;AKAP17A;AKNA;AL                                                                                                                                                                                                                                                                                                                                                                                                                                                                                                                                                                                                                                                                                                              |
| blue | BP | GO:0048011  | nerve growth factor receptor signaling p... | 17735 | 223  | 2487 | 52  | 33.09  | 0.00048  | 1.571472 | ADCY3;ADCY6;ADCY7;ADCY9;AP2B1;ARHGEF1;ARHGEF18;ARHGEF19;ARHGEF20;ARHGEF21;ARHGEF22;ARHGEF                                                                                                                                                                                                                                                                                                                                                                                                                                                                                                                                                                                                                                                                                                             |
| blue | MF | GO:0005089  | Rho guanyl-nucleotide exchange factor ac... | 17735 | 73   | 2487 | 22  | 10.62  | 0.00049  | 2.071563 | ALS2CL;ARHGEF1;ARHGEF16;ARHGEF18;ARHGEF19;ARHGEF20;ARHGEF21;ARHGEF22;ARHGEF23;ARHGEF24;ARHGEF                                                                                                                                                                                                                                                                                                                                                                                                                                                                                                                                                                                                                                                                                                         |
| blue | MF | GO:0008186  | RNA-dependent ATPase activity               | 17735 | 22   | 2487 | 10  | 3.2    | 5.00E-04 | 3.125    | DDX17;DDX18;DDX20;DDX23;DDX24;DDX56;DHX9;EIF4A3;G3BP1;SUPV3L1                                                                                                                                                                                                                                                                                                                                                                                                                                                                                                                                                                                                                                                                                                                                         |
| blue | CC | GO:0034399  | nuclear periphery                           | 17735 | 100  | 2487 | 27  | 14.08  | 5.00E-04 | 1.917614 | AKAP8;ATN1;BLM;CAD;DNMT3A;HLCS;HNRNP;KIF4A;MAP1;MBO1;NONO;NUMA1;NUP205;NUP93;PAXIP                                                                                                                                                                                                                                                                                                                                                                                                                                                                                                                                                                                                                                                                                                                    |
| blue | BP | GO:0008088  | axon cargo transport                        | 17735 | 33   | 2487 | 13  | 4.9    | 0.00051  | 2.653061 | AP3D1;AP3S1;APBA1;BLOC1S1;CNTNAP1;DST;HTT;KIF3B;KIF4A;KLC2;MAPT;SNAPIN;SPG7                                                                                                                                                                                                                                                                                                                                                                                                                                                                                                                                                                                                                                                                                                                           |
| blue | BP | GO:0035966  | response to topologically incorrect prot... | 17735 | 140  | 2487 | 36  | 20.78  | 0.00052  | 1.732435 | AARS;ADD1;AMFR;ATF6B;CALR;CCND1;CREB3L2;CUL7;DCTN1;DDIT3;DERL2;EDEMI1;EIF2AK3;EIF2AI                                                                                                                                                                                                                                                                                                                                                                                                                                                                                                                                                                                                                                                                                                                  |
| blue | BP | GO:0030968  | endoplasmic reticulum unfolded protein r... | 17735 | 86   | 2487 | 25  | 12.76  | 0.00053  | 1.959248 | AARS;ADD1;AMFR;CALR;CCND1;CUL7;DCTN1;DDIT3;DERL2;EDEMI1;EIF2AK3;EIF2AK4;GOSR2;HSP90B1;HYO                                                                                                                                                                                                                                                                                                                                                                                                                                                                                                                                                                                                                                                                                                             |
| blue | MF | GO:0019901  | protein kinase binding                      | 17735 | 357  | 2487 | 75  | 51.94  | 0.00053  | 1.443974 | ABL1;ADCY6;ARHGEF7;ATG13;AXIN1;AXIN2;BAD;BCL10;BRK2;CCND2;CCNT1;CD3E;CD4;CD8A;CDC                                                                                                                                                                                                                                                                                                                                                                                                                                                                                                                                                                                                                                                                                                                     |
| blue | BP | GO:0045934  | negative regulation of nucleobase-contai... | 17735 | 932  | 2487 | 174 | 138.32 | 0.00055  | 1.257953 | ARHGAP35;ASXL1;ATN1;ATP8B1;AXIN1;BAHD1;BLM;BMP2;BPTF;BRD7;BTRC;C14orf169;C1D;CALR;CAPN3;C                                                                                                                                                                                                                                                                                                                                                                                                                                                                                                                                                                                                                                                                                                             |
| blue | BP | GO:0016570  | histone modification                        | 17735 | 268  | 2487 | 60  | 39.77  | 0.00058  | 1.508675 | APBB1;ASXL1;BAZ1B;BRD1;BRD7;BRPF1;C14orf169;CSR2BP2;CTCF;CTRN;DNMT1;EHMT1;EP400;GATA3;GTF                                                                                                                                                                                                                                                                                                                                                                                                                                                                                                                                                                                                                                                                                                             |
| blue | BP | GO:0044085  | cellular component biogenesis               | 17735 | 1686 | 2487 | 296 | 250.22 | 6.00E-04 | 1.182959 | AARS2;ABCF1;ABL1;ACACA;ACACB;ADD1;AIF1;AIFM1;ALAD;ALDH5A1;ALMS1;AMFR;ANK3;AP2B1;APBA1;ARG1;AR                                                                                                                                                                                                                                                                                                                                                                                                                                                                                                                                                                                                                                                                                                         |
| blue | BP | GO:0016569  | covalent chromatin modification             | 17735 | 274  | 2487 | 61  | 40.66  | 0.00061  | 1.500246 | APBB1;ASXL1;BAZ1B;BRD1;BRD7;BRPF1;C14orf169;CSR2BP2;CTCF;CTRN;DNMT1;DNMT3A;EHMT1;EP400;G1                                                                                                                                                                                                                                                                                                                                                                                                                                                                                                                                                                                                                                                                                                             |
| blue | BP | GO:0051726  | regulation of cell cycle                    | 17735 | 736  | 2487 | 141 | 109.23 | 0.00062  | 1.290854 | ABL1;AIF1;AKT2;ANAPC1;ANAPCS;ANAPC7;APBB1;ATM;AXIN2;BAD;BCL2;BID;BLM;BMP2;BRD7;BTRC;C11orf                                                                                                                                                                                                                                                                                                                                                                                                                                                                                                                                                                                                                                                                                                            |
| blue | BP | GO:0031323  | regulation of cellular metabolic process    | 17735 | 4397 | 2487 | 717 | 652.55 | 0.00063  | 1.098766 | ABCA2;ABCF1;ABL1;ABL2;ABLIM1;ACACA;ACACB;ACAD8;ACR2;ACLY;ACN9;ACTR8;ACVR1;ADCY6;AIF                                                                                                                                                                                                                                                                                                                                                                                                                                                                                                                                                                                                                                                                                                                   |
| blue | CC | GO:0031968  | organelle outer membrane                    | 17735 | 138  | 2487 | 34  | 19.43  | 0.00065  | 1.749871 | ACLS5;AIFM2;AKAP1;BAD;BCL2;BID;BR13BP;CYB5B;DHC7;EMD;GUCY2D;HADHB;ITPR3;MAVS;MGST1;MLXII                                                                                                                                                                                                                                                                                                                                                                                                                                                                                                                                                                                                                                                                                                              |
| blue | BP | GO:0035967  | cellular response to topologically incor... | 17735 | 92   | 2487 | 26  | 13.65  | 0.00066  | 1.904762 | AARS;ADD1;AMFR;CALR;CCND1;CUL7;DCTN1;DDIT3;DERL2;EDEMI1;EIF2AK3;EIF2AK4;GOSR2;HSP90B1;HYO                                                                                                                                                                                                                                                                                                                                                                                                                                                                                                                                                                                                                                                                                                             |
| blue | MF | GO:0005085  | guanyl-nucleotide exchange factor activi... | 17735 | 176  | 2487 | 42  | 25.61  | 0.00066  | 1.639984 | ALS2CL;ANKRD27;ARHGEF1;ARHGEF16;ARHGEF18;ARHGEF19;ARHGEF20;ARHGEF21;ARHGEF22;ARHGEF23;ARHGEF24                                                                                                                                                                                                                                                                                                                                                                                                                                                                                                                                                                                                                                                                                                        |
| blue | BP | GO:0006260  | DNA replication                             | 17735 | 275  | 2487 | 61  | 40.81  | 0.00067  | 1.494732 | BLM;CALR;CDAN1;CHTF8;CINP;CI21;CTC1;DKC1;DNAJA3;DTL;FEN1;GINS4;GTPBP4;HELB;HMGA1;INGS1;INO                                                                                                                                                                                                                                                                                                                                                                                                                                                                                                                                                                                                                                                                                                            |
| blue | BP | GO:2000112  | regulation of cellular macromolecule bio... | 17735 | 3117 | 2487 | 520 | 462.59 | 0.00068  | 1.241016 | ABCF1;ABL1;ABLIM1;ACAD8;ACR2;ACR28;ACVR1;AKAP17A;AKNA;AKT2;APBB1;ARHGAP35;ARID18;B                                                                                                                                                                                                                                                                                                                                                                                                                                                                                                                                                                                                                                                                                                                    |
| blue | BP | GO:0006271  | DNA strand elongation involved in DNA re... | 17735 | 34   | 2487 | 13  | 5.05   | 0.00071  | 2.574257 | FEN1;GINS4;LIG1;LIG3;MCM2;MCM3;MCM4;MCM6;POLA1;POLA2;RFC1;RPA1;RPA2                                                                                                                                                                                                                                                                                                                                                                                                                                                                                                                                                                                                                                                                                                                                   |
| blue | BP | GO:0006302  | double-strand break repair                  | 17735 | 112  | 2487 | 30  | 16.02  | 0.00071  | 1.805054 | APBB1;ATM;BAZ1B;BLM;CHEK2;DCLRE1C;FAN1;FEN1;FOXM1;INO80;LIG1;LIG3;MAD2L2;MDC1;MLH1;PALB                                                                                                                                                                                                                                                                                                                                                                                                                                                                                                                                                                                                                                                                                                               |
| blue | BP | GO:0006974  | response to DNA damage stimulus             | 17735 | 608  | 2487 | 119 | 90.23  | 0.00072  | 1.318852 | ABL1;ACTR8;APBB1;ATM;AXIN2;BATF;BAZ1B;BCL2;BLM;CASP2;CCND1;CD74;CDKN2A;CEP164;CHD11;CHEK2                                                                                                                                                                                                                                                                                                                                                                                                                                                                                                                                                                                                                                                                                                             |
| blue | BP | GO:1901575  | organic substance catabolic process         | 17735 | 1842 | 2487 | 320 | 273.37 | 0.00073  | 1.170575 | ABCA2;ABCF1;ABL1;ACAD8;ACE;ACLY;ACOX2;ACOX3;ADPGK;ADSS;AFG3L2;AGAP5;AGAP6;AHS1A;AIFM1;AKT2;AL                                                                                                                                                                                                                                                                                                                                                                                                                                                                                                                                                                                                                                                                                                         |
| blue | BP | GO:0030010  | establishment of cell polarity              | 17735 | 69   | 2487 | 21  | 10.24  | 0.00074  | 2.050781 | AMOTL1;BRSK2;CCR7;CDK5RAP2;CYTH1;CYTH3;LYNLT1;FBI1;FOXJ1;FRMD4A;GATA3;HTT;JAM3;KAN                                                                                                                                                                                                                                                                                                                                                                                                                                                                                                                                                                                                                                                                                                                    |
| blue | BP | GO:0010556  | regulation of macromolecule biosynthetic... | 17735 | 3197 | 2487 | 532 | 474.46 | 0.00074  | 1.121275 | ABCA2;ABCF1;ABL1;ABLIM1;ACAD8;ACR2;ACR28;ACVR1;AKAP17A;AKNA;AKT2;APBB1;ARHGAP35;ARID18;B                                                                                                                                                                                                                                                                                                                                                                                                                                                                                                                                                                                                                                                                                                              |
| blue | BP | GO:0006541  | glutamine metabolic process                 | 17735 | 19   | 2487 | 9   | 2.82   | 0.00077  | 3.191489 | ALDH5A1;CAD;CTPS2;GGH;GSL2;GMPS;LGSN;MECP2;PFAS                                                                                                                                                                                                                                                                                                                                                                                                                                                                                                                                                                                                                                                                                                                                                       |
| blue | CC | GO:0000151  | ubiquitin ligase complex                    | 17735 | 150  | 2487 | 36  | 21.12  | 0.00077  | 1.704545 | ANAPC1;ANAPC13;ANAPCS;ANAPC7;ATG3;BTRC;CCNF;CDC16;CUL1;CUL4A;CUL7;CUL9;DCAF16;DCAF4;DCAI                                                                                                                                                                                                                                                                                                                                                                                                                                                                                                                                                                                                                                                                                                              |
| blue | BP | GO:1901605  | alpha-amino acid metabolic process          | 17735 | 174  | 2487 | 42  | 25.82  | 0.00078  | 1.626646 | ACAD8;ADSS;AGMAT;ALDH18A1;ALDH5A1;ALDH6A1;ALDH7A1;ARG1;CAD;CTPS2;DLD;DLST;DNMT3A;EIF5A;A                                                                                                                                                                                                                                                                                                                                                                                                                                                                                                                                                                                                                                                                                                              |
| blue | BP | GO:0051172  | negative regulation of nitrogen compound... | 17735 | 945  | 2487 | 175 | 140.25 | 0.00079  | 1.247772 | ARHGAP35;ASXL1;ATN1;ATP8B1;AXIN1;BAHD1;BLM;BMP2;BPTF;BRD7;BTRC;C14orf169;C1D;CALR;CAPN3;C                                                                                                                                                                                                                                                                                                                                                                                                                                                                                                                                                                                                                                                                                                             |
| blue | MF | GO:0000988  | protein binding transcription factor act... | 17735 | 514  | 2487 | 101 | 74.78  | 8.00E-04 | 1.350629 | ARHGAP35;ARID18;ASXL1;ATN1;BATF3;BCL10;BCL9L;BRD7;C1D;CBFA2T2;CCAR1;CITA;CREG1;CREM;CRCT1                                                                                                                                                                                                                                                                                                                                                                                                                                                                                                                                                                                                                                                                                                             |
| blue | BP | GO:0006915  | apoptotic process                           | 17735 | 1562 | 2487 | 275 | 231.81 | 8.00E-04 | 1.186316 | AARS;ABL1;ACAA2;ACER2;ACLS5;ACVR1;ADD1;AIFM1;AIFM2;AKT2;ALMS1;ALX3;AMBRA1;APBB1;ARHGEF1                                                                                                                                                                                                                                                                                                                                                                                                                                                                                                                                                                                                                                                                                                               |
| blue | MF | GO:0000989  | transcription factor binding transcripti... | 17735 | 498  | 2487 | 98  | 72.45  | 9.00E-04 | 1.352657 | ARHGAP35;ARID18;ASXL1;ATN1;BATF3;BCL10;BCL9L;BRD7;C1D;CBFA2T2;CCAR1;CITA;CREG1;CREM;CRCT1                                                                                                                                                                                                                                                                                                                                                                                                                                                                                                                                                                                                                                                                                                             |
| blue | BP | GO:0016043  | cellular component organization             | 17735 | 4124 | 2487 | 673 | 612.03 | 0.00094  | 1.099619 | AAK1;AARS2;ABL1;ABL2;ABLIM1;ACACA;ACACB;ACR28;ADD1;AFG3L2;AIF1;AIFM2;AKAP8;AKT2;AKT3                                                                                                                                                                                                                                                                                                                                                                                                                                                                                                                                                                                                                                                                                                                  |
| blue | MF | GO:0047485  | protein N-terminus binding                  | 17735 | 2487 | 2487 | 24  | 12.51  | 0.00096  | 1.918465 | ATM;CALM3;CSNK2A2;DCN;EIF5A;ERCC3;ERCC5;EXOC1;EXOC2;GRIN2C;MECP2;PARR1;PEX5;RELA;RI                                                                                                                                                                                                                                                                                                                                                                                                                                                                                                                                                                                                                                                                                                                   |
| blue | BP | GO:0006261  | DNA-dependent DNA replication               | 17735 | 99   | 2487 | 27  | 14.69  | 0.00096  | 1.837985 | BLM;CI21;DNAJA3;FEN1;GINS4;HELB;HMGA1;INO80;LIG1;LIG3;MCM2;MCM3;MCM4;MCM6;POLA1;POLA2                                                                                                                                                                                                                                                                                                                                                                                                                                                                                                                                                                                                                                                                                                                 |
| blue | BP | GO:0051569  | regulation of histone H3-K4 methylation     | 17735 | 16   | 2487 | 8   | 2.37   | 0.00098  | 3.375527 | CTRN;DNMT1;GATA3;KDM1A;MLL4;PAXIP1;PYGO2;SNW1                                                                                                                                                                                                                                                                                                                                                                                                                                                                                                                                                                                                                                                                                                                                                         |
| blue | CC | GO:0006520  | cellular amino acid metabolic process       | 17735 | 461  | 2487 | 93  | 68.42  | 0.001    | 1.359252 | AARS;AARS2;ACAD8;ADSS;AGMAT;ALDH18A1;ALDH5A1;ALDH6A1;ALDH7A1;ARG1;ATIC;CAD;CARNS1;CKM1                                                                                                                                                                                                                                                                                                                                                                                                                                                                                                                                                                                                                                                                                                                |
| blue | BP | GO:0016591  | DNA-directed RNA polymerase II, holoenz...  | 17735 | 89   | 2487 | 24  | 12.53  | 0.00102  | 1.915403 | CTRN;ELP3;ERCC3;ERCC5;GTF2A2;IKBKG;INTS1;INTS4;INTS7;INTS9;LEO1;MMS19;POLR2B;POLR2C;POLR2J                                                                                                                                                                                                                                                                                                                                                                                                                                                                                                                                                                                                                                                                                                            |
| blue | BP | GO:0012501  | programmed cell death                       | 17735 | 1575 | 2487 | 276 | 233.74 | 0.00104  | 1.180799 | AARS;ABL1;ACAA2;ACER2;ACLS5;ACVR1;ADD1;AIFM1;AIFM2;AKT2;ALMS1;ALX3;AMBRA1;APBB1;ARHGEF1                                                                                                                                                                                                                                                                                                                                                                                                                                                                                                                                                                                                                                                                                                               |
| blue | BP | GO:0016054  | organic acid catabolic process              | 17735 | 198  | 2487 | 46  | 29.38  | 0.00107  | 1.565691 | ACAD8;ACOX2;ACOX3;AKT2;ALDH5A1;ALDH6A1;ALDH7A1;AMACR;ARG1;CAD;DLD;DLST;ECI2;ENOSF1;ETFD                                                                                                                                                                                                                                                                                                                                                                                                                                                                                                                                                                                                                                                                                                               |
| blue | BP | GO:0046395  | carboxylic acid catabolic process           | 17735 | 198  | 2487 | 46  | 29.38  | 0.00107  | 1.565691 | ACAD8;ACOX2;ACOX3;AKT2;ALDH5A1;ALDH6A1;ALDH7A1;AMACR;ARG1;CAD;DLD;DLST;ECI2;ENOSF1;ETFD                                                                                                                                                                                                                                                                                                                                                                                                                                                                                                                                                                                                                                                                                                               |
| blue | MF | GO:0002039  | p53 binding                                 | 17735 | 49   | 2487 | 16  | 7.13   | 0.00108  | 2.244039 | AXIN1;BLM;BRD7;CDKN2A;EHMT1;HSPD1;HTT;KDM1A;RFXD2;RNF20;SMARCA4;TAF1;TAF3;TP53;TP53BP1                                                                                                                                                                                                                                                                                                                                                                                                                                                                                                                                                                                                                                                                                                                |
| blue | BP | GO:0051168  | nuclear export                              | 17735 | 120  | 2487 | 31  | 17.81  | 0.00113  | 1.740595 | CALR;CDKN2A;CPSEF3;DDX19B;DXH38;DUSP16;EIF5A;EMD;GLE1;HHEX;HSPA9;HTT;KHDRBS1;LSG1;MAGOH                                                                                                                                                                                                                                                                                                                                                                                                                                                                                                                                                                                                                                                                                                               |
| blue | BP | GO:0019048  | virus-host interaction                      | 17735 | 371  | 2487 | 77  | 55.06  | 0.00116  | 1.398474 | ATP6V1H;BAD;BICD1;BTRC;CBX5;CCNT1;CD247;CD4;CRCT1;CRYS3;CUL1;CUL4A;CUL7;DDB1;DYNC1L2;DYNLL1                                                                                                                                                                                                                                                                                                                                                                                                                                                                                                                                                                                                                                                                                                           |
| blue | BP | GO:2000113  | negative regulation of cellular macromol... | 17735 | 923  | 2487 | 170 | 136.98 | 0.0012   | 1.241057 | ACER2;ARHGAP35;ASXL1;ATN1;ATP8B1;BAHD1;BLM;BMP2;BPTF;BRD7;BTRC;C14orf169;C1D;CALR;CAPN3;C                                                                                                                                                                                                                                                                                                                                                                                                                                                                                                                                                                                                                                                                                                             |
| blue | CC | GO:0005643  | nuclear pore                                | 17735 | 75   | 2487 | 21  |        |          |          |                                                                                                                                                                                                                                                                                                                                                                                                                                                                                                                                                                                                                                                                                                                                                                                                       |

|      |    |            |                                              |       |      |      |     |        |         |          |                                                                                                                                                                                                                                                                                                                                                                                                                                                                                                                                                                                                                                                                                                                                                                                                                                |
|------|----|------------|----------------------------------------------|-------|------|------|-----|--------|---------|----------|--------------------------------------------------------------------------------------------------------------------------------------------------------------------------------------------------------------------------------------------------------------------------------------------------------------------------------------------------------------------------------------------------------------------------------------------------------------------------------------------------------------------------------------------------------------------------------------------------------------------------------------------------------------------------------------------------------------------------------------------------------------------------------------------------------------------------------|
| blue | BP | GO:0009113 | purine nucleobase biosynthetic process       | 17735 | 10   | 2487 | 6   | 1.48   | 0.0013  | 4.054054 | CECR1;GART;GMP5;PAICS;PRPS1;SHMT1                                                                                                                                                                                                                                                                                                                                                                                                                                                                                                                                                                                                                                                                                                                                                                                              |
| blue | BP | GO:0016032 | viral reproduction                           | 17735 | 689  | 2487 | 131 | 102.25 | 0.0013  | 1.281174 | AP2B1;APOBEC3F;ATP6V1H;BAD;BCL2;BICD1;BTRC;CBX5;CCNT1;CD247;CD4;CRTCI;CRTC3;CUL1;CUL4A;CUL4                                                                                                                                                                                                                                                                                                                                                                                                                                                                                                                                                                                                                                                                                                                                    |
| blue | BP | GO:0006399 | tRNA metabolic process                       | 17735 | 121  | 2487 | 31  | 17.96  | 0.00131 | 1.726058 | AARS;AARS2;ADAT1;C22orf28;CDKAL1;DARS2;EARS2;EPFS;FARS5;GARS;HARS;IARS;LARS;LARS2                                                                                                                                                                                                                                                                                                                                                                                                                                                                                                                                                                                                                                                                                                                                              |
| blue | BP | GO:0016072 | rRNA metabolic process                       | 17735 | 111  | 2487 | 29  | 16.47  | 0.00133 | 1.760777 | C1D;CDKN2A;DDX47;DDX51;DDX56;DIS3L1;DKC1;DROSHA;EIF4A3;EXOSC10;FTSJ2;FTSJ3;GAR1;GEMIN4;HEAT                                                                                                                                                                                                                                                                                                                                                                                                                                                                                                                                                                                                                                                                                                                                    |
| blue | CC | GO:0005813 | centrosome                                   | 17735 | 374  | 2487 | 74  | 52.66  | 0.00133 | 1.405241 | AK5;AKAP9;ALMS1;ARL3;AXIN2;BRSK2;C2CD3;CALM3;CCDC64;CCNF;CCNT1;CCNT2;CCNT3;CCNT4;CCNT5;CCNT6;CCNT7;CCNT8;CCNT9;CCNT10;CCNT11;CCNT12;CCNT13;CCNT14;CCNT15;CCNT16;CCNT17;CCNT18;CCNT19;CCNT20;CCNT21;CCNT22;CCNT23;CCNT24;CCNT25;CCNT26;CCNT27;CCNT28;CCNT29;CCNT30;CCNT31;CCNT32;CCNT33;CCNT34;CCNT35;CCNT36;CCNT37;CCNT38;CCNT39;CCNT40;CCNT41;CCNT42;CCNT43;CCNT44;CCNT45;CCNT46;CCNT47;CCNT48;CCNT49;CCNT50;CCNT51;CCNT52;CCNT53;CCNT54;CCNT55;CCNT56;CCNT57;CCNT58;CCNT59;CCNT60;CCNT61;CCNT62;CCNT63;CCNT64;CCNT65;CCNT66;CCNT67;CCNT68;CCNT69;CCNT70;CCNT71;CCNT72;CCNT73;CCNT74;CCNT75;CCNT76;CCNT77;CCNT78;CCNT79;CCNT80;CCNT81;CCNT82;CCNT83;CCNT84;CCNT85;CCNT86;CCNT87;CCNT88;CCNT89;CCNT90;CCNT91;CCNT92;CCNT93;CCNT94;CCNT95;CCNT96;CCNT97;CCNT98;CCNT99;CCNT100                                                   |
| blue | BP | GO:0051056 | regulation of small GTPase mediated sign...  | 17735 | 367  | 2487 | 76  | 54.67  | 0.00133 | 1.395263 | AGAP5;AGAP6;AKT2;ALS2CL;ARHGAP15;ARHGAP17;ARHGAP18;ARHGAP19;ARHGAP20;ARHGAP21;ARHGAP22;ARHGAP23;ARHGAP24;ARHGAP25;ARHGAP26;ARHGAP27;ARHGAP28;ARHGAP29;ARHGAP30;ARHGAP31;ARHGAP32;ARHGAP33;ARHGAP34;ARHGAP35;ARHGAP36;ARHGAP37;ARHGAP38;ARHGAP39;ARHGAP40;ARHGAP41;ARHGAP42;ARHGAP43;ARHGAP44;ARHGAP45;ARHGAP46;ARHGAP47;ARHGAP48;ARHGAP49;ARHGAP50;ARHGAP51;ARHGAP52;ARHGAP53;ARHGAP54;ARHGAP55;ARHGAP56;ARHGAP57;ARHGAP58;ARHGAP59;ARHGAP60;ARHGAP61;ARHGAP62;ARHGAP63;ARHGAP64;ARHGAP65;ARHGAP66;ARHGAP67;ARHGAP68;ARHGAP69;ARHGAP70;ARHGAP71;ARHGAP72;ARHGAP73;ARHGAP74;ARHGAP75;ARHGAP76;ARHGAP77;ARHGAP78;ARHGAP79;ARHGAP80;ARHGAP81;ARHGAP82;ARHGAP83;ARHGAP84;ARHGAP85;ARHGAP86;ARHGAP87;ARHGAP88;ARHGAP89;ARHGAP90;ARHGAP91;ARHGAP92;ARHGAP93;ARHGAP94;ARHGAP95;ARHGAP96;ARHGAP97;ARHGAP98;ARHGAP99;ARHGAP100          |
| blue | BP | GO:0007266 | Rho protein signal transduction              | 17735 | 200  | 2487 | 46  | 29.68  | 0.00134 | 1.549865 | ALS2CL;ARHGAP15;ARHGAP29;ARHGAP35;ARHGFE1;ARHGFE16;ARHGFE18;ARHGFE19;ARHGFE20;ARHGFE21;ARHGFE22;ARHGFE23;ARHGFE24;ARHGFE25;ARHGFE26;ARHGFE27;ARHGFE28;ARHGFE29;ARHGFE30;ARHGFE31;ARHGFE32;ARHGFE33;ARHGFE34;ARHGFE35;ARHGFE36;ARHGFE37;ARHGFE38;ARHGFE39;ARHGFE40;ARHGFE41;ARHGFE42;ARHGFE43;ARHGFE44;ARHGFE45;ARHGFE46;ARHGFE47;ARHGFE48;ARHGFE49;ARHGFE50;ARHGFE51;ARHGFE52;ARHGFE53;ARHGFE54;ARHGFE55;ARHGFE56;ARHGFE57;ARHGFE58;ARHGFE59;ARHGFE60;ARHGFE61;ARHGFE62;ARHGFE63;ARHGFE64;ARHGFE65;ARHGFE66;ARHGFE67;ARHGFE68;ARHGFE69;ARHGFE70;ARHGFE71;ARHGFE72;ARHGFE73;ARHGFE74;ARHGFE75;ARHGFE76;ARHGFE77;ARHGFE78;ARHGFE79;ARHGFE80;ARHGFE81;ARHGFE82;ARHGFE83;ARHGFE84;ARHGFE85;ARHGFE86;ARHGFE87;ARHGFE88;ARHGFE89;ARHGFE90;ARHGFE91;ARHGFE92;ARHGFE93;ARHGFE94;ARHGFE95;ARHGFE96;ARHGFE97;ARHGFE98;ARHGFE99;ARHGFE100 |
| blue | CC | GO:0046930 | pore complex                                 | 17735 | 91   | 2487 | 24  | 12.81  | 0.00142 | 1.873536 | BCL2;DDX19A;DDX19B;EIF5A;GLE1;IPO5;IPO9;MYO1C;NUP133;NUP155;NUP188;NUP205;NUP210;NUP214;NUP216;NUP219;NUP220;NUP221;NUP222;NUP223;NUP224;NUP225;NUP226;NUP227;NUP228;NUP229;NUP230;NUP231;NUP232;NUP233;NUP234;NUP235;NUP236;NUP237;NUP238;NUP239;NUP240;NUP241;NUP242;NUP243;NUP244;NUP245;NUP246;NUP247;NUP248;NUP249;NUP250;NUP251;NUP252;NUP253;NUP254;NUP255;NUP256;NUP257;NUP258;NUP259;NUP260;NUP261;NUP262;NUP263;NUP264;NUP265;NUP266;NUP267;NUP268;NUP269;NUP270;NUP271;NUP272;NUP273;NUP274;NUP275;NUP276;NUP277;NUP278;NUP279;NUP280;NUP281;NUP282;NUP283;NUP284;NUP285;NUP286;NUP287;NUP288;NUP289;NUP290;NUP291;NUP292;NUP293;NUP294;NUP295;NUP296;NUP297;NUP298;NUP299;NUP300                                                                                                                                   |
| blue | BP | GO:0044764 | multi-organism cellular process              | 17735 | 691  | 2487 | 131 | 102.55 | 0.00145 | 1.277426 | AP2B1;APOBEC3F;ATP6V1H;BAD;BCL2;BICD1;BTRC;CBX5;CCNT1;CD247;CD4;CRTCI;CRTC3;CUL1;CUL4A;CUL4B                                                                                                                                                                                                                                                                                                                                                                                                                                                                                                                                                                                                                                                                                                                                   |
| blue | BP | GO:0008219 | cell death                                   | 17735 | 1741 | 2487 | 301 | 258.38 | 0.00145 | 1.164951 | AARS;ABL1;ACAA2;ACER2;ACO2;ACSL5;ACVR1;ADD1;AFG3L2;AIFM1;AIFM2;AKT2;ALMS1;ALX3;AMBRA1;AN                                                                                                                                                                                                                                                                                                                                                                                                                                                                                                                                                                                                                                                                                                                                       |
| blue | BP | GO:0030163 | protein catabolic process                    | 17735 | 531  | 2487 | 104 | 78.8   | 0.00148 | 1.319797 | ACE;AFG3L2;AMFR;ANAPC1;ANAPCS;ANAPC7;ARIH2;ATM;AXIN1;BTRC;CBLB;PMS2;PMS2IP;RNF8;CHEK3;CSN                                                                                                                                                                                                                                                                                                                                                                                                                                                                                                                                                                                                                                                                                                                                      |
| blue | MF | GO:0016740 | transferase activity                         | 17735 | 1705 | 2487 | 290 | 248.05 | 0.00148 | 1.169119 | AAK1;ABL1;ABL2;ACAA2;ACLY;ACVR1;ADPGK;AGK;AGPAT3;AGPAT6;AGT2L2;AK2;AK5;AKT2;AKT3;ALDH18A                                                                                                                                                                                                                                                                                                                                                                                                                                                                                                                                                                                                                                                                                                                                       |
| blue | CC | GO:0090544 | BAF-type complex                             | 17735 | 14   | 2487 | 7   | 1.97   | 0.0015  | 3.553299 | PHF10;SMARCA4;SMARCC1;SMARCC2;SMARCCD1;SMARCCD3;SMARCE1                                                                                                                                                                                                                                                                                                                                                                                                                                                                                                                                                                                                                                                                                                                                                                        |
| blue | BP | GO:0016265 | death                                        | 17735 | 1743 | 2487 | 301 | 258.68 | 0.00156 | 1.1636   | AARS;ABL1;ACAA2;ACER2;ACO2;ACSL5;ACVR1;ADD1;AFG3L2;AIFM1;AIFM2;AKT2;ALMS1;ALX3;AMBRA1;AP                                                                                                                                                                                                                                                                                                                                                                                                                                                                                                                                                                                                                                                                                                                                       |
| blue | MF | GO:0004004 | ATP-dependent RNA helicase activity          | 17735 | 21   | 2487 | 9   | 3.06   | 0.00161 | 2.941176 | DDX18;DDX20;DDX23;DDX24;DDX56;DHH9;EIF4A3;G3BP1;SUPV3L1                                                                                                                                                                                                                                                                                                                                                                                                                                                                                                                                                                                                                                                                                                                                                                        |
| blue | BP | GO:0010558 | negative regulation of macromolecule bio...  | 17735 | 961  | 2487 | 175 | 142.62 | 0.00172 | 1.227037 | ACER2;ARHGAP35;ASB1;ASXL1;ATN1;ATP8B1;AXIN1;BAHD1;BLM;BMP2;BPTF;BRD7;BTRC;C14orf169;C1D                                                                                                                                                                                                                                                                                                                                                                                                                                                                                                                                                                                                                                                                                                                                        |
| blue | BP | GO:0022616 | DNA strand elongation                        | 17735 | 37   | 2487 | 13  | 5.49   | 0.00177 | 2.367942 | FEN1;GINS4;LIG1;LIG3;MCM2;MCM3;MCM4;MCM6;POLA1;POLA2;RFC1;RPA1;RPA2                                                                                                                                                                                                                                                                                                                                                                                                                                                                                                                                                                                                                                                                                                                                                            |
| blue | BP | GO:0032774 | RNA biosynthetic process                     | 17735 | 3293 | 2487 | 542 | 488.71 | 0.00177 | 1.109042 | ABCA2;ABL1;ABLIM1;ACAD8;ACTR8;ACVR1;AKAP17A;AKNA;ALX3;APBB1;ARHGAP35;ARID1B;ARNTL2;ASCC1                                                                                                                                                                                                                                                                                                                                                                                                                                                                                                                                                                                                                                                                                                                                       |
| blue | BP | GO:0006987 | activation of signaling protein activity...  | 17735 | 64   | 2487 | 19  | 9.5    | 0.00179 | 2        | ADD1;CALR;CUL7;DCTN1;DDIT3;EDEM1;EIF2AK3;GOSR2;HSP90B1;HYOU1;KDELR3;MBTPS1;PDIA5;PDIA6;SH                                                                                                                                                                                                                                                                                                                                                                                                                                                                                                                                                                                                                                                                                                                                      |
| blue | BP | GO:0032259 | methylation                                  | 17735 | 139  | 2487 | 34  | 20.63  | 0.00185 | 1.648085 | CTCF;CTRN;DNMT1;DNMT3A;EHMT1;FAM103A1;FTSJ2;FTSJ3;GATA3;HEM1;ICMT;KDM1A;MECP2;MLL;MLL2                                                                                                                                                                                                                                                                                                                                                                                                                                                                                                                                                                                                                                                                                                                                         |
| blue | BP | GO:0016445 | somatic diversification of immunoglobuli...  | 17735 | 46   | 2487 | 15  | 6.83   | 0.00191 | 2.196193 | BATF;CD40LG;CTNBL1;FOXP1;HSPD1;IL10;IL4;MLH1;MSH6;PAKIP1;PMS2;PMS2IP;RNF8;TRAF3;JML                                                                                                                                                                                                                                                                                                                                                                                                                                                                                                                                                                                                                                                                                                                                            |
| blue | BP | GO:0043632 | modification-dependent macromolecule cat...  | 17735 | 395  | 2487 | 80  | 58.62  | 0.00194 | 1.364722 | AMFR;ANAPC1;ANAPCS;ANAPC7;ARIH2;AXIN1;BTRC;CCNF;CDC16;CSNK1E;CUL1;CUL4A;CUL7;CUL9;DDB1;D                                                                                                                                                                                                                                                                                                                                                                                                                                                                                                                                                                                                                                                                                                                                       |
| blue | BP | GO:0006099 | tricarboxylic acid cycle                     | 17735 | 29   | 2487 | 11  | 4.3    | 0.00195 | 2.55814  | ACO2;DLG;DLST;FH;IDH3A;NNT;OGDH;PDHA1;PDHB;SDHA;SDHB                                                                                                                                                                                                                                                                                                                                                                                                                                                                                                                                                                                                                                                                                                                                                                           |
| blue | MF | GO:0016772 | transferase activity, transferring phosph... | 17735 | 889  | 2487 | 160 | 129.34 | 0.00195 | 1.23705  | AAK1;ABL1;ABL2;ACVR1;ADPGK;AGK;AK2;AK5;AKT2;AKT3;ALDH18A1;ATM;BAZ1B;BRSK2;C9orf96;CAD;CAR1                                                                                                                                                                                                                                                                                                                                                                                                                                                                                                                                                                                                                                                                                                                                     |
| blue | BP | GO:0044093 | positive regulation of molecular function... | 17735 | 1099 | 2487 | 197 | 163.1  | 0.00195 | 1.207848 | ABL1;ABL2;ACER2;ADCY3;ADCY6;ADCY7;ADCY9;ADD1;AHS1;AIFM1;AKT2;ANAPC1;ANAPCS;ANAPC7;ANK3                                                                                                                                                                                                                                                                                                                                                                                                                                                                                                                                                                                                                                                                                                                                         |
| blue | MF | GO:0036979 | single-stranded DNA binding                  | 17735 | 61   | 2487 | 18  | 8.87   | 0.00202 | 2.029312 | BLM;CRY2;CTC1;ERCC5;FUBP1;HNRNPA2B1;HSPD1;MCM4;MCM6;MLH1;PMS2;PMS2IP;RPA1;RPA2;SSBP2                                                                                                                                                                                                                                                                                                                                                                                                                                                                                                                                                                                                                                                                                                                                           |
| blue | BP | GO:0000086 | G2/M transition of mitotic cell cycle        | 17735 | 145  | 2487 | 35  | 21.52  | 0.00204 | 1.626394 | ABCB1;AKAP9;ALMS1;ANAPCS;BRSK2;CCDC25B;CDK5RAP2;CDKN2A;CDKN2B;CEP164;CEP72;CHEK2;CKAP5;C                                                                                                                                                                                                                                                                                                                                                                                                                                                                                                                                                                                                                                                                                                                                       |
| blue | CC | GO:0031966 | mitochondrial membrane                       | 17735 | 496  | 2487 | 93  | 69.84  | 0.00206 | 1.331615 | ACAA2;ACSL5;AFG3L2;AGK;AIFM1;AIFM2;AK2;AKAP1;ALDH18A1;ALDH3A2;APOOL;ATP5A1;ATP5B;ATP5J;AT                                                                                                                                                                                                                                                                                                                                                                                                                                                                                                                                                                                                                                                                                                                                      |
| blue | CC | GO:0032993 | transcriptional repressor complex            | 17735 | 63   | 2487 | 18  | 8.87   | 0.00207 | 2.029312 | C1D;CBX5;CHD3;CHD4;CORO2A;DDX20;HDAC1;IAZF1;MTA1;MTA2;MTA3;NCOR2;RBBP4;RBBP7;SALL2;SMA                                                                                                                                                                                                                                                                                                                                                                                                                                                                                                                                                                                                                                                                                                                                         |
| blue | BP | GO:0032321 | positive regulation of Rho GTPase activi...  | 17735 | 65   | 2487 | 19  | 9.65   | 0.00219 | 1.968912 | ARHGAP15;ARHGAP29;ARHGAP35;ARHGFE16;ARHGFE18;ARHGFE19;ARHGFE20;ARHGFE21;ARHGFE22;ARHGFE23                                                                                                                                                                                                                                                                                                                                                                                                                                                                                                                                                                                                                                                                                                                                      |
| blue | CC | GO:0044450 | microtubule organizing center part           | 17735 | 94   | 2487 | 24  | 13.24  | 0.00229 | 1.812689 | AKAP9;ALMS1;CCNF;CDK5RAP2;CEP104;CEP164;CKNPA5;CKNPA6;PAKIP1;PMS2;PMS2IP;RNF8;TRAF3;JML                                                                                                                                                                                                                                                                                                                                                                                                                                                                                                                                                                                                                                                                                                                                        |
| blue | BP | GO:0006511 | ubiquitin-dependent protein catabolic pr...  | 17735 | 386  | 2487 | 78  | 57.29  | 0.00234 | 1.361494 | AMFR;ANAPC1;ANAPCS;ANAPC7;ARIH2;AXIN1;BTRC;CCNF;CDC16;CSNK1E;CUL1;CUL4A;CUL7;CUL9;DDB1;D                                                                                                                                                                                                                                                                                                                                                                                                                                                                                                                                                                                                                                                                                                                                       |
| blue | BP | GO:0051252 | regulation of RNA metabolic process          | 17735 | 2953 | 2487 | 488 | 438.25 | 0.00234 | 1.11352  | ABCA2;ABL1;ABLIM1;ACAD8;ACTR8;ACVR1;AKAP17A;AKNA;APBB1;ARHGAP35;ARID1B;ARNTL2;ASCC1;ASXL                                                                                                                                                                                                                                                                                                                                                                                                                                                                                                                                                                                                                                                                                                                                       |
| blue | CC | GO:0032993 | protein-DNA complex                          | 17735 | 110  | 2487 | 27  | 15.49  | 0.00235 | 1.74306  | CTC1;H3F3C;HELB;HHEX;HIST1H2AK;HIST1H2BA;HIST1H2BE;HIST2H2AC;HIST2H2AE;HIST2H3D;HIST1BP3;KAT                                                                                                                                                                                                                                                                                                                                                                                                                                                                                                                                                                                                                                                                                                                                   |
| blue | BP | GO:0033554 | cellular response to stress                  | 17735 | 1209 | 2487 | 214 | 179.43 | 0.00237 | 1.192666 | AARS;ABL1;ACTR8;ADD1;AIFM1;AKT2;AMFR;APBB1;ARG1;ARHGFE6;ATG10;ATG13;ATG14;ATG15;ATG16;ATG17                                                                                                                                                                                                                                                                                                                                                                                                                                                                                                                                                                                                                                                                                                                                    |
| blue | BP | GO:0009889 | regulation of biosynthetic process           | 17735 | 3356 | 2487 | 550 | 498.06 | 0.00237 | 1.104285 | ABCA2;ABCF1;ABL1;ABLIM1;ACAD8;ACER2;ACN9;ACTR8;ACVR1;ADCY7;AKAP17A;AKNA;AKT2;APBB1;ARHG                                                                                                                                                                                                                                                                                                                                                                                                                                                                                                                                                                                                                                                                                                                                        |
| blue | BP | GO:0019941 | modification-dependent protein catabolic...  | 17735 | 392  | 2487 | 79  | 58.18  | 0.00238 | 1.357855 | AMFR;ANAPC1;ANAPCS;ANAPC7;ARIH2;AXIN1;BTRC;CCNF;CDC16;CSNK1E;CUL1;CUL4A;CUL7;CUL9;DDB1;D                                                                                                                                                                                                                                                                                                                                                                                                                                                                                                                                                                                                                                                                                                                                       |
| blue | BP | GO:0010605 | negative regulation of macromolecule met...  | 17735 | 1359 | 2487 | 238 | 201.69 | 0.00241 | 1.180029 | ABL1;ACER2;ANAPC1;ANAPCS;ANAPC7;APBB1;ARHGAP35;ASB1;ASXL1;ATN1;ATP8B1;AXIN1;BAHD1;BBS2;B                                                                                                                                                                                                                                                                                                                                                                                                                                                                                                                                                                                                                                                                                                                                       |
| blue | BP | GO:0051253 | negative regulation of RNA metabolic pro...  | 17735 | 852  | 2487 | 156 | 126.44 | 0.00242 | 1.233787 | ARHGAP35;ASXL1;ATN1;ATP8B1;AXIN1;BAHD1;BBS2;BMP2;BPTF;BRD7;BTRC;C14orf169;C1D;CALR;CAPN3;CBFA2                                                                                                                                                                                                                                                                                                                                                                                                                                                                                                                                                                                                                                                                                                                                 |
| blue | BP | GO:0006364 | rRNA processing                              | 17735 | 105  | 2487 | 27  | 15.58  | 0.00245 | 1.732991 | C1D;CDKN2A;DDX47;DDX51;DDX56;DKC1;EIF4A3;EXOSC10;FTSJ2;FTSJ3;GAR1;GEMIN4;HEATR1;LAS1L;NOL9                                                                                                                                                                                                                                                                                                                                                                                                                                                                                                                                                                                                                                                                                                                                     |
| blue | BP | GO:0044403 | symbiosis, encompassing mutualism throug...  | 17735 | 445  | 2487 | 88  | 66.04  | 0.00248 | 1.332526 | ATP6V0E1;ATP6V1D;ATP6V1F;ATP6V1H;BAD;BICD1;BTRC;CAMP;CBX5;CCNT1;CD247;CD4;CRTCI;CRTC3;CUL                                                                                                                                                                                                                                                                                                                                                                                                                                                                                                                                                                                                                                                                                                                                      |
| blue | BP | GO:0044419 | interspecies interaction between organis...  | 17735 | 445  | 2487 | 88  | 66.04  | 0.00248 | 1.332526 | ATP6V0E1;ATP6V1D;ATP6V1F;ATP6V1H;BAD;BICD1;BTRC;CAMP;CBX5;CCNT1;CD247;CD4;CRTCI;CRTC3;CUL                                                                                                                                                                                                                                                                                                                                                                                                                                                                                                                                                                                                                                                                                                                                      |
| blue | MF | GO:0048037 | cofactor binding                             | 17735 | 255  | 2487 | 54  | 37.1   | 0.00249 | 1.455526 | ACAD8;ACLY;ACOX2;ACOX3;AGXT2L2;AIFM1;AIFM2;ALDH6A1;ASPDH;CREG1;D2HGDH;DHCR24;DHODH;DLI                                                                                                                                                                                                                                                                                                                                                                                                                                                                                                                                                                                                                                                                                                                                         |
| blue | BP | GO:0045061 | thymic T cell selection                      | 17735 | 18   | 2487 | 8   | 2.67   | 0.00252 | 2.996255 | CARD11;CCR7;CD3E;CD74;GATA3;ITPKB;MINK1;P25                                                                                                                                                                                                                                                                                                                                                                                                                                                                                                                                                                                                                                                                                                                                                                                    |
| blue | BP | GO:0031327 | negative regulation of cellular biosynth...  | 17735 | 1000 | 2487 | 180 | 148.41 | 0.00252 | 1.212856 | ACER2;ARHGAP35;ASB1;ASXL1;ATN1;ATP8B1;AXIN1;BAHD1;BLM;BMP2;BPTF;BRD7;BTRC;C14orf169;C1D;C                                                                                                                                                                                                                                                                                                                                                                                                                                                                                                                                                                                                                                                                                                                                      |
| blue | CC | GO:0043596 | nuclear replication fork                     | 17735 | 27   | 2487 | 10  | 3.8    | 0.00257 | 2.631579 | BAZ1B;HELB;MCM3;POLA1;POLA2;POLE;POLE3;RPA1;RPA2;ZMP2                                                                                                                                                                                                                                                                                                                                                                                                                                                                                                                                                                                                                                                                                                                                                                          |
| blue | BP | GO:0006767 | water-soluble vitamin metabolic process      | 17735 | 66   | 2487 | 19  | 9.79   | 0.00265 | 1.940756 | FASN;GPNH;GSTO1;MCCC1;MMACHC;MMADHC;MTHFD1;MTHFR;NFS1;PNPO;PPCS;PSAT1;SHMT1;SLC23A2                                                                                                                                                                                                                                                                                                                                                                                                                                                                                                                                                                                                                                                                                                                                            |
| blue | BP | GO:0032075 | positive regulation of nuclease activity     | 17735 | 66   | 2487 | 19  | 9.79   | 0.00265 | 1.940756 | ADD1;CALR;CUL7;DCTN1;DDIT3;EDEM1;EIF2AK3;GOSR2;HSP90B1;HYOU1;KDELR3;MBTPS1;PDIA5;PDIA6;SH                                                                                                                                                                                                                                                                                                                                                                                                                                                                                                                                                                                                                                                                                                                                      |
| blue | BP | GO:0010629 | negative regulation of gene expression       | 17735 | 909  | 2487 | 165 | 134.9  | 0.00265 | 1.223128 | ARHGAP35;ASXL1;ATN1;ATP8B1;AXIN1;BAHD1;BBS2;BMP2;BPTF;BRD7;BTRC;C14orf169;C1D;CALR;CAPN3;CBFA2                                                                                                                                                                                                                                                                                                                                                                                                                                                                                                                                                                                                                                                                                                                                 |
| blue | BP | GO:0031326 | regulation of cellular biosynthetic proc...  | 17735 | 3328 | 2487 | 545 | 493.9  | 0.00266 | 1.103462 | ABCA2;ABCF1;ABL1;ABLIM1;ACAD8;ACER2;ACN9;ACTR8;ACVR1;ADCY7;AKAP17A;AKNA;AKT2;APBB1;ARHG                                                                                                                                                                                                                                                                                                                                                                                                                                                                                                                                                                                                                                                                                                                                        |
| blue | CC | GO:0043601 | nuclear replisome                            | 17735 | 19   | 2487 | 8   | 2.68   | 0.00271 | 2.985075 | HELB;MCM3;POLA1;POLA2;POLE;POLE3;RPA1;RPA2                                                                                                                                                                                                                                                                                                                                                                                                                                                                                                                                                                                                                                                                                                                                                                                     |
| blue | MF | GO:0004518 | nuclease activity                            | 17735 | 161  | 2487 | 37  | 23.42  | 0.00271 | 1.579846 | CPFS3;DBR1;DCLRE1C;DFFA;DFFB;DIS3L1;DNASE1;DROSHA;EME2;ERCC5;EXD2;EXOG;EXOSC10;FAN1;FEN1;G                                                                                                                                                                                                                                                                                                                                                                                                                                                                                                                                                                                                                                                                                                                                     |
| blue | MF | GO:0005088 | Ras guanyl-nucleotide exchange factor ac...  | 17735 | 108  | 2487 | 27  | 15.71  | 0.00283 | 1.718651 | ALS2CL;ARHGFE1;ARHGFE16;ARHGFE18;ARHGFE19;ARHGFE20;ARHGFE21;ARHGFE22;ARHGFE23;ARHGFE24;ARHGFE25                                                                                                                                                                                                                                                                                                                                                                                                                                                                                                                                                                                                                                                                                                                                |
| blue | CC | GO:0005740 | mitochondrial envelope                       | 17735 | 520  | 2487 | 96  | 73.22  | 0.00286 | 1.311117 | ABCF2;ACAA2;ACN9;ACSL5;AFG3L2;AGK;AIFM1;AIFM2;AK1;AIFM2;AK2;AK3;AK4;AK5;AK6;AK7;AK8;AK9;AK10;AK11                                                                                                                                                                                                                                                                                                                                                                                                                                                                                                                                                                                                                                                                                                                              |
| blue | BP | GO:0009199 | ribonucleoside triphosphate metabolic pr...  | 17735 | 477  | 2487 | 93  | 70.79  | 0.00294 | 1.313745 | ABCA2;ABCC1;ACLY;ADSS;AGAP5;AGAP6;AK2;AK5;AKT2;ARHGAP15;ARHGAP29;ARHGAP35;ARHGFE16;ARHG                                                                                                                                                                                                                                                                                                                                                                                                                                                                                                                                                                                                                                                                                                                                        |
| blue | BP | GO:0009116 | nucleoside metabolic process                 | 17735 | 602  | 2487 | 114 | 89.34  | 0.00297 | 1.276024 | ABCA2;ABCC1;ACACA;ACACB;ACLY;ADSS;AGAP5;AGAP6;AHS1;AK2;AK5;AKT2;APOBEC3F;ARHGAP15;ARHG                                                                                                                                                                                                                                                                                                                                                                                                                                                                                                                                                                                                                                                                                                                                         |
| blue | MF | GO:0019900 | kinase binding                               | 17735 | 397  | 2487 | 78  | 57.76  | 0.00299 | 1.350416 | ABL1;ADCY6;ARHGFE7;ATG13;AXIN1;AXIN2;BAD;BCL10;BRSK2;CCND1;CCND2;CCNT1;CD3E;CD4;CD8A;CD2C                                                                                                                                                                                                                                                                                                                                                                                                                                                                                                                                                                                                                                                                                                                                      |
| blue | MF | GO:0042162 | telomeric DNA binding                        | 17735 | 15   | 2487 | 7   | 2.18   | 0.003   | 3.211009 | HNRNPA2B1;NCL;SMG6;TERF2;TP53BP1;XRCC5;XRCC6                                                                                                                                                                                                                                                                                                                                                                                                                                                                                                                                                                                                                                                                                                                                                                                   |
| blue | BP | GO:0010833 | telomere maintenance via telomere length...  | 17735 | 39   | 2487 | 13  | 5.79   | 0.00302 | 2.24525  | DKC1;FEN1;LIG1;PINX1;POLA1;POLA2;POLE;RF1;RPA1;RPA2;TERF2;TERF2IP;TNKS1BP1                                                                                                                                                                                                                                                                                                                                                                                                                                                                                                                                                                                                                                                                                                                                                     |
| blue | BP | GO:0007005 | mitochondrion organization                   | 17735 | 230  | 2487 | 50  | 34.13  | 0.00302 | 1.464987 | AARS2;AFG3L2;AIFM1;AIFM2;AKT3;ATG3;BAD;BCL2;BIK;CDKN2A;CHCHD3;CLN8;COX10;DARS2;DHODH;H                                                                                                                                                                                                                                                                                                                                                                                                                                                                                                                                                                                                                                                                                                                                         |
| blue | MF | GO:0019904 | protein                                      |       |      |      |     |        |         |          |                                                                                                                                                                                                                                                                                                                                                                                                                                                                                                                                                                                                                                                                                                                                                                                                                                |

|      |    |            |                                             |       |      |      |     |        |         |          |                                                                                            |
|------|----|------------|---------------------------------------------|-------|------|------|-----|--------|---------|----------|--------------------------------------------------------------------------------------------|
| blue | BP | GO:0009892 | negative regulation of metabolic process    | 17735 | 1456 | 2487 | 252 | 216.08 | 0.00338 | 1.166235 | ABL1;ACER2;ANAPC1;ANAPCS;ANAPC7;ANKLE2;APBB1;ARHGAP35;ASB1;ASXL1;ATN1;ATP8B1;AXIN1;BAHD1   |
| blue | BP | GO:2001141 | regulation of RNA biosynthetic process      | 17735 | 2889 | 2487 | 476 | 428.75 | 0.00339 | 1.110204 | ABCA2;ABL1;ABLIM1;ACAD8;ACTR8;ACVR1;AKAP17A;AKNA;APBB1;ARHGAP35;ARID1B;ARNTL2;ASCC1;ASXL1  |
| blue | BP | GO:0045892 | negative regulation of transcription, DN... | 17735 | 823  | 2487 | 150 | 122.14 | 0.00348 | 1.228099 | ARHGAP35;ARNTL2;ATN1;ATP8B1;BAHD1;BMP2;BPTF;BRD7;BTRC;C14orf169;C1D;CALR;CAPN3;CBFA2T2;CBX |
| blue | BP | GO:0009890 | negative regulation of biosynthetic proc... | 17735 | 1014 | 2487 | 181 | 150.49 | 0.00353 | 1.202738 | ACER2;APBB1;ARHGAP35;ASB1;ASXL1;ATN1;ATP8B1;AXIN1;BAHD1;BLM;BMP2;BPTF;BRD7;BTRC;C14orf169  |
| blue | BP | GO:0043547 | positive regulation of GTPase activity      | 17735 | 150  | 2487 | 35  | 22.26  | 0.0037  | 1.572327 | AKT2;ARHGAP15;ARHGAP29;ARHGAP35;ARHGFE16;ARHGFE5;ARHGFE6;ARHGFE7;AXIN1;AXIN2;CCR7;DOCK     |
| blue | BP | GO:0006406 | mRNA export from nucleus                    | 17735 | 63   | 2487 | 18  | 9.35   | 0.00371 | 1.925134 | CPSF3;DDX19B;DHX38;EIF5A;GLE1;HHEX;MAGO;NUP133;NUP155;NUP214;NXF1;RNPS1;SMG6;SRM1;SR       |
| blue | BP | GO:0006152 | purine nucleoside catabolic process         | 17735 | 422  | 2487 | 83  | 62.63  | 0.00376 | 1.325243 | ABCA2;ABCC1;ACLY;ADSS;AGAP5;AGAP6;AKT2;ARHGAP15;ARHGAP29;ARHGAP35;ARHGFE16;ARHGFE5;AR      |
| blue | BP | GO:0046130 | purine ribonucleoside catabolic process     | 17735 | 422  | 2487 | 83  | 62.63  | 0.00376 | 1.325243 | ABCA2;ABCC1;ACLY;ADSS;AGAP5;AGAP6;AKT2;ARHGAP15;ARHGAP29;ARHGAP35;ARHGFE16;ARHGFE5;AR      |
| blue | BP | GO:0006482 | protein demethylation                       | 17735 | 19   | 2487 | 8   | 2.82   | 0.00379 | 2.836879 | C14orf169;KDM1A;KDM2B;KDM4A;KDM4C;KDM5C;PPME1;UBE2E                                        |
| blue | BP | GO:0008214 | protein dealkylation                        | 17735 | 19   | 2487 | 8   | 2.82   | 0.00379 | 2.836879 | C14orf169;KDM1A;KDM2B;KDM4A;KDM4C;KDM5C;PPME1;UBE2E                                        |
| blue | BP | GO:0044257 | cellular protein catabolic process          | 17735 | 428  | 2487 | 84  | 63.52  | 0.00379 | 1.322418 | AMFR;ANAPC1;ANAPCS;ANAPC7;ARIH2;AXIN1;BTRC;CCNF;CDC16;CHEK2;CLN8;CSNK1E;CUL1;CUL4A;CUL7;C  |
| blue | CC | GO:0005856 | cytoskeleton                                | 17735 | 1762 | 2487 | 286 | 248.11 | 0.00383 | 1.152715 | ABCA2;ABL1;ABL2;ABLIM1;ACTR10;ADD1;AIF1;AKS;AKAP9;ALMS1;ANK3;ANKS1B;ARHGAP32;ARHGAP35;AR   |
| blue | BP | GO:0016447 | somatic recombination of immunoglobulin ... | 17735 | 40   | 2487 | 13  | 5.94   | 0.00388 | 2.188552 | BATF;CD40LG;FOXP1;HSPD1;IL10;IL4;MLH1;MSH6;PAXIP1;PMS2;RNF8;TCF3;UNC                       |
| blue | BP | GO:0003230 | positive regulation of Ras GTPase activi... | 17735 | 98   | 2487 | 25  | 14.54  | 0.00389 | 1.719395 | AKT2;ARHGAP15;ARHGAP29;ARHGAP35;ARHGFE5;CCR7;DOCK7;EPHA11;EPHA2;FOXJ1;MYO9B;N              |
| blue | CC | GO:0006405 | RNA export from nucleus                     | 17735 | 73   | 2487 | 20  | 10.83  | 0.00392 | 1.846722 | CPSF3;DDX19B;DHX38;EIF5A;GLE1;HHEX;KHDRBS1;MAGO;NUP133;NUP155;NUP214;NXF1;RNPS1;SMG6;S     |
| blue | CC | GO:0044430 | cytoskeletal part                           | 17735 | 1266 | 2487 | 211 | 178.27 | 0.00392 | 1.183598 | ABCA2;ADD1;AIF1;AKS;AKAP9;ALMS1;ANKS1B;ARHGAP32;ARL3;ARPC2;ATM;AXIN1;AXIN2;E               |
| blue | BP | GO:0031123 | RNA 3'-end processing                       | 17735 | 93   | 2487 | 24  | 13.8   | 0.00394 | 1.73913  | CNOT10;CPSF3;CTSF1;CTSF2;CTSF3;DHX38;EIF4A3;EIF4B;EIF4G1;INTS1;LEO1;MAGO;MLH1;MTAP;PABPC   |
| blue | BP | GO:0051701 | interaction with host                       | 17735 | 411  | 2487 | 81  | 61     | 0.00394 | 1.327869 | ATP6V0E1;ATP6V1D;ATP6V1F;ATP6V1H;BAD;BICD1;BTRC;CAMP;CBX5;CCNT1;CD247;CD4;CRTC1;CRTC3;CUI  |
| blue | CC | GO:0005680 | anaphase-promoting complex                  | 17735 | 20   | 2487 | 8   | 2.82   | 0.00396 | 2.836879 | ANAPC1;ANAPC3;ANAPCS;ANAPC7;CDC16;CUL7;FZR1;MAD2L2                                         |
| blue | MF | GO:0031625 | ubiquitin protein ligase binding            | 17735 | 148  | 2487 | 34  | 21.53  | 0.00396 | 1.579192 | AXIN1;AXIN2;BCL10;BCL2;BID;CALR;CHEK2;CUL1;CUL4A;CUL7;CUL9;DLG3;FAF1;HERC2;KDM4A;MUL1;NEDD |
| blue | MF | GO:0004389 | small conjugating protein ligase binding    | 17735 | 148  | 2487 | 34  | 21.53  | 0.00396 | 1.579192 | AXIN1;AXIN2;BCL10;BCL2;BID;CALR;CHEK2;CUL1;CUL4A;CUL7;CUL9;DLG3;FAF1;HERC2;KDM4A;MUL1;NEDD |
| blue | CC | GO:0005815 | microtubule organizing center               | 17735 | 482  | 2487 | 89  | 67.87  | 0.00396 | 1.31113  | ABCA2;AKS;AKAP9;ALMS1;ARL3;AXIN2;BBS2;BBS9;BIRC6;BRSK2;C2C3;CALM3;CCDC64;CCNF;CCT5;CCT8;C  |
| blue | BP | GO:0006355 | regulation of transcription, DNA-depende... | 17735 | 2869 | 2487 | 472 | 425.78 | 0.00396 | 1.108554 | ABCA2;ABL1;ABLIM1;ACAD8;ACTR8;ACVR1;AKAP17A;AKNA;APBB1;ARHGAP35;ARID1B;ARNTL2;ASCC1;ASXL   |
| blue | BP | GO:0006913 | nucleocytoplasmic transport                 | 17735 | 342  | 2487 | 69  | 50.76  | 0.00419 | 1.359338 | AXIN1;AXIN2;CALR;CLB;CDKN2A;CPSF3;DDX19B;DHX38;DUSP16;EDAR;EIF5A;EMD;FAF1;FGF2;FLNA;GLE1;F |
| blue | CC | GO:0000781 | chromosome, telomeric region                | 17735 | 52   | 2487 | 15  | 7.32   | 0.00428 | 2.04918  | ATM;BLM;CHEK2;CTC1;PINX1;RNF8;SLX4;SMG6;TEP1;TERF2;TERF2IP;TNKS1BP1;TP53BP1;XRCC5;XRCC     |
| blue | BP | GO:0009063 | cellular amino acid catabolic process       | 17735 | 109  | 2487 | 27  | 16.18  | 0.00429 | 1.668727 | ACAD8;ALDH5A1;ALDH6A1;ALDH7A1;ARG1;CAD;DLD;DLST;ENOF51;ETHE1;GLUD1;GOT1;GOT2;GPT;GHT2      |
| blue | BP | GO:0006312 | mitotic recombination                       | 17735 | 36   | 2487 | 12  | 5.34   | 0.00432 | 2.247191 | BLM;FEN1;LIG1;MLH1;POLA1;POLA2;POLE;RFC1;RPA1;RPA2;TEP1;TOP2E                              |
| blue | BP | GO:0006366 | transcription from RNA polymerase II pro... | 17735 | 1444 | 2487 | 249 | 214.3  | 0.00432 | 1.161923 | ABCA2;ABL1;ABLIM1;ACVR1;ARNTL2;ASXL1;ATN1;AXIN1;BATF3;BCL11B;BCL9L;BEX1;BMP2;BPTF;BRD2;BRD |
| blue | BP | GO:0043085 | positive regulation of catalytic activit... | 17735 | 908  | 2487 | 163 | 134.75 | 0.0044  | 1.209647 | ABL1;ABCC2;ADCY3;ADCY6;ADCY7;ADCY9;ADD1;AHSA1;AIFM1;AKT2;ANAPC1;ANAPCS;ANAPC7;ARHG         |
| blue | BP | GO:0071824 | protein-DNA complex subunit organization    | 17735 | 157  | 2487 | 36  | 23.3   | 0.00444 | 1.545064 | BAZ1B;BRD2;CENPN;CENPO;CTCF;GTF2A2;H3F3C;HIST1H2AC;HIST1H2AK;HIST1H2BN;HIST2H2AC;HIST2H2B  |
| blue | BP | GO:0032507 | maintenance of protein location in cell     | 17735 | 94   | 2487 | 24  | 13.95  | 0.00456 | 1.72043  | AXIN1;AXIN2;BCL10;BCL2;BID;CALR;CHEK2;CUL1;CUL4A;CUL7;CUL9;DLG3;FAF1;HERC2;KDM4A;MUL1;NEDD |
| blue | CC | GO:0005776 | autophagic vacuole                          | 17735 | 38   | 2487 | 12  | 5.35   | 0.00459 | 2.242991 | AMBR1;ATG14;ATG9B;ENTPD4;FYCO1;GABARAPL2;HTT;IRGM;MAP1L3B2;RAB24;RPN2;TECP1                |
| blue | MF | GO:0031267 | small GTPase binding                        | 17735 | 133  | 2487 | 31  | 19.35  | 0.00459 | 1.602067 | ALS2CL;ANXA2;ARHGFE16;BICD1;CCDC64;CDC42BPB;DIAPH1;DOCK10;DOCK7;DOCK9;EXOC2;FGD1;FLNA;FA   |
| blue | BP | GO:0009119 | ribonucleoside metabolic process            | 17735 | 556  | 2487 | 105 | 82.51  | 0.00463 | 1.272573 | ABCA2;ABCC1;ACACA;ACACB;ACLY;ADSS;AGAP5;AGAP6;AK2;AKS;AKT2;AP0BEC3;ARHGAP15;ARHGAP29;A     |
| blue | MF | GO:0004519 | endonuclease activity                       | 17735 | 102  | 2487 | 25  | 14.84  | 0.00523 | 1.684636 | CPSF3;DBR1;DCLRE1C;DNASE1;DROSHA;EME2;ERCC5;EXO1;FAN1;FEN1;MRPL44;PMS2;POP1;RNASE          |
| blue | MF | GO:0003713 | transcription coactivator activity          | 17735 | 270  | 2487 | 55  | 39.28  | 0.00539 | 1.400204 | ARID1B;ASXL1;BCL10;BCL9L;BRD7;CCAR1;CITA;CREM;CRTL1;CRTC3;DDX17;ECD;FGF2;GATA3;GMEB2;GTF2  |
| blue | CC | GO:0005667 | transcription factor complex                | 17735 | 297  | 2487 | 58  | 41.82  | 0.00553 | 1.386896 | ARNTL2;ASCC1;BEX1;CD3EAP;CREG1;CREM;ERCC3;ERCC5;ETS1;FOXCl;FOXJ1;FOXJ3;FOXK1;FOXK2;FC      |
| blue | CC | GO:0030894 | replisome                                   | 17735 | 21   | 2487 | 8   | 2.96   | 0.00562 | 2.702703 | HELB;MCM3;POLA1;POLA2;POLE;POLE3;RPA1;RPA2                                                 |
| blue | CC | GO:0080008 | Cul4-RING ubiquitin ligase complex          | 17735 | 21   | 2487 | 8   | 2.96   | 0.00562 | 2.702703 | CUL4A;DCAF16;DCAF4;DCAF5;DCAF7;DCAF8;DDB1;DTL                                              |
| blue | CC | GO:0035097 | histone methyltransferase complex           | 17735 | 59   | 2487 | 16  | 8.31   | 0.00627 | 1.925391 | CBX5;EZH1;HCF1;LAS1L;MGA;MLL;MLL4;PAXIP1;RBBP4;RBBP7;RUVBL1;SETD1A;STK38;TAF1;TAF6;TEX1C   |
| blue | MF | GO:0017016 | Ras GTPase binding                          | 17735 | 120  | 2487 | 28  | 17.46  | 0.00672 | 1.603666 | ALS2CL;ANXA2;ARHGFE16;BICD1;CCDC64;CDC42BPB;DIAPH1;DOCK10;DOCK7;DOCK9;EXOC2;FLNA;FMNL1;I   |
| blue | CC | GO:0005720 | nuclear heterochromatin                     | 17735 | 26   | 2487 | 9   | 3.66   | 0.00697 | 2.459016 | CBX5;DNMT3A;FOXC1;MPHOSPH8;NCAPD3;PHC1;SATB1;TCP1;TNKS1BP1                                 |
| blue | MF | GO:0016301 | kinase activity                             | 17735 | 762  | 2487 | 135 | 110.86 | 0.00735 | 1.217752 | AAK1;ABL1;ABL2;ACVR1;ADPGK;AGK;AK2;AKS;AKT2;AKT3;ALDH18A1;ATM;BAZ1B;BRSK2;C9orf96;CAD;CARL |
| blue | CC | GO:0017119 | Golgi transport complex                     | 17735 | 10   | 2487 | 5   | 1.41   | 0.00749 | 3.546099 | COG1;COG2;COG5;COG7;GOLGA3                                                                 |
| blue | MF | GO:0016893 | endonuclease activity, active with eithe... | 17735 | 39   | 2487 | 12  | 5.67   | 0.00752 | 2.116402 | DBR1;DNASE1;DROSHA;FAN1;FEN1;MRPL44;POP1;RNASEH1;RPP14;RPP21;SLX4;TATDN2                   |
| blue | CC | GO:0031965 | nuclear membrane                            | 17735 | 194  | 2487 | 40  | 27.32  | 0.00774 | 1.464129 | ABL1;ATP2A3;BCL2;CCND2;CLIC1;DDX19A;DDX19B;DGKH;DHC7;DNAJC1;DTL;EMD;FZR1;GTPBP4;GUCY2D;I   |
| blue | MF | GO:0051087 | chaperone binding                           | 17735 | 44   | 2487 | 13  | 6.4    | 0.00801 | 2.03125  | AHSA1;ATP1A1;BAG3;CALR;DNAJC1;GRPEL1;HSPD1;OGDH;ST13;STIP1;TBCC;TP53;TSC1                  |
| blue | CC | GO:0000421 | autophagic vacuole membrane                 | 17735 | 18   | 2487 | 7   | 2.53   | 0.00834 | 2.766798 | ATG9B;ENTPD4;GABARAPL2;IRGM;MAP1L3B2;RPN2;TECP1                                            |
| blue | CC | GO:0034708 | methyltransferase complex                   | 17735 | 61   | 2487 | 16  | 8.59   | 0.00881 | 1.862631 | CBX5;EZH1;HCF1;LAS1L;MGA;MLL;MLL4;PAXIP1;RBBP4;RBBP7;RUVBL1;SETD1A;STK38;TAF1;TAF6;TEX1C   |
| blue | CC | GO:0000922 | spindle pole                                | 17735 | 94   | 2487 | 22  | 13.24  | 0.01016 | 1.661631 | ALMS1;BIRC6;CALM3;CDC25B;CDK5RAP2;CEP85;CEP98;CKAP5;DCTN1;FBF1;KNTC1;NUMA1;NUP62;ODF2;P    |
| blue | MF | GO:0034061 | DNA polymerase activity                     | 17735 | 36   | 2487 | 11  | 5.24   | 0.0109  | 2.099237 | DKC1;MYBBP1A;PAPD7;POLA1;POLA2;POLB;POLE;PEP83;POLG;POLH;TEP1                              |
| blue | MF | GO:0003684 | damaged DNA binding                         | 17735 | 46   | 2487 | 13  | 6.69   | 0.01188 | 1.943199 | CRY2;DDB1;ERCC3;FEN1;LOC100133315;MSH6;NEIL2;POLB;POLH;RAD18;TP53;TP53BP1;XPC              |
| blue | MF | GO:0017048 | Rho GTPase binding                          | 17735 | 51   | 2487 | 14  | 7.42   | 0.01204 | 1.886792 | ARHGFE16;CDC42BPB;DIAPH1;DOCK10;DOCK7;DOCK9;FLNA;FMNL3;KCTD13;KIF3B;OCLR;PARD6A;SRGAP1;I   |
| blue | CC | GO:0005721 | centromeric heterochromatin                 | 17735 | 11   | 2487 | 5   | 1.55   | 0.01216 | 3.225806 | BAZ1B;CBX5;DNMT1;INCPEN;NCAPD3                                                             |
| blue | CC | GO:0031252 | cell leading edge                           | 17735 | 260  | 2487 | 50  | 36.61  | 0.01259 | 1.365747 | AAK1;ABL1;AIF1;AKT2;AMOTL1;APBB1;ARHGFE4;ARHGFE6;ARHGFE7;ARPC2;ARPC3;CDC42BPA;CDC42BPB;C   |
| blue | MF | GO:0016773 | phosphotransferase activity, alcohol gro... | 17735 | 706  | 2487 | 124 | 102.71 | 0.01293 | 1.207283 | AAK1;ABL1;ABL2;ACVR1;ADPGK;AGK;AKT2;AKT3;ATM;BAZ1B;BRSK2;C9orf96;CAD;CCL8;CCND1;CDC42BPA;C |
| blue | MF | GO:0016741 | transferase activity, transferring one-c... | 17735 | 183  | 2487 | 38  | 26.62  | 0.01363 | 1.427498 | ASMT;ATIC;CAD;DNMT1;DNMT3A;EHMT1;EZH1;FTS1;FTS3;GART;HEMK1;IBAS7;ICMT;METTL13;METTL16;     |
| blue | CC | GO:0000152 | nuclear ubiquitin ligase complex            | 17735 | 24   | 2487 | 8   | 3.38   | 0.01378 | 2.366864 | ANAPC1;ANAPC3;ANAPCS;ANAPC7;CDC16;CUL7;FZR1;MAD2L2                                         |
| blue | MF | GO:0017110 | nucleoside-diphosphatase activity           | 17735 | 11   | 2487 | 5   | 1.6    | 0.01395 | 3.125    | ENTPD4;ENTPD5;ENTPD8;NUDT9;SLC25A42                                                        |
| blue | MF | GO:0003899 | DNA-directed RNA polymerase activity        | 17735 | 42   | 2487 | 12  | 6.11   | 0.01404 | 1.963993 | CD3EAP;POLA1;POLR1A;POLR1B;POLR2B;POLR2C;POLR2L;POLR3A;POLR3B;POLR3C;POLR3E;RPAP1          |
| blue | MF | GO:0004521 | RNA polymerase activity                     | 17735 | 42   | 2487 | 12  | 6.11   | 0.01404 | 1.963993 | CD3EAP;POLA1;POLR1A;POLR1B;POLR2B;POLR2C;POLR2L;POLR3A;POLR3B;POLR3C;POLR3E;RPAP1          |
| blue | MF | GO:0004521 | endoribonuclease activity                   | 17735 | 47   | 2487 | 13  | 6.84   | 0.01429 | 1.900585 | CPSF3;DBR1;DROSHA;FEN1;MRPL44;POP1;RNASE2;RNASE3;RNASE4;RNASEH1;RPP14;RPP21;SMG6           |
| blue | MF | GO:0004143 | diacylglycerol kinase activity              | 17735 | 15   | 2487 | 6   | 2.18   | 0.0145  | 2.752294 | AGK;CERK;DGKA;DGKD;DGKH;DGKQ                                                               |
| blue | MF | GO:0015278 | calcium-release channel activity            | 17735 | 15   | 2487 | 6   | 2.18   | 0.0145  | 2.752294 | CYTH3;ITPR3;JPH3;RASA3;RYR2;TPCN1                                                          |
| blue | MF | GO:0030983 | mismatched DNA binding                      | 17735 | 15   | 2487 | 6   | 2.18   | 0.0145  | 2.752294 | MLH1;MSH6;PMS2;PMS2CL;PMS2PS;XPC                                                           |
| blue | MF | GO:0032452 | histone demethylase activity                | 17735 | 15   | 2487 | 6   | 2.18   | 0.0145  | 2.752294 | C14orf169;KDM1A;KDM2B;KDM4A;KDM4C;KDM5C                                                    |
| blue | MF | GO:0070577 | histone acetyl-lysine binding               | 17735 | 15   | 2487 | 6   | 2.18   | 0.0145  | 2.752294 | BAZ1B;BRD2;BRD7;MLL;SMARCA4;TAF1                                                           |
| blue | MF | GO:0043566 | structure-specific DNA binding              | 17735 | 219  | 2487 | 44  | 31.86  | 0.01497 | 1.381042 | AKAP8;BLM;CRY2;CTC1;CTCF;ERCC5;FEN1;FOXCl;FOXJ1;FOXJ3;FOXK1;FOXK2;FOXMM1;FOXP1;FOXP4;F     |
| blue | CC | GO:0000795 | synaptonemal complex                        | 17735 | 29   | 2487 | 9   | 4.08   | 0.0151  | 2.205882 | BLM;INCPEN;LIG3;MLH1;RPA1;SYCE2;TEX12;TOP2B;UBE2I                                          |



|       |    |            |                                             |       |      |      |     |        |         |          |                                                                                                     |
|-------|----|------------|---------------------------------------------|-------|------|------|-----|--------|---------|----------|-----------------------------------------------------------------------------------------------------|
| blue  | MF | GO:0001085 | RNA polymerase II transcription factor b... | 17735 | 73   | 2487 | 18  | 10.62  | 0.01525 | 1.694915 | BEX1;CHD4;DHX9;GTF2A2;HDAC1;KDM1A;LDB1;LMO2;LPIN1;MAD2L2;MTA1;MTA2;PPARA;SMAD3;TBP;TCF              |
| blue  | CC | GO:0000118 | histone deacetylase complex                 | 17735 | 49   | 2487 | 13  | 6.9    | 0.0157  | 1.884058 | CBX5;CHD3;CHD4;HDAC1;ING2;MBD2;MTA1;MTA2;MTA3;RBBP4;RBBP7;SALL2;SAP30                               |
| blue  | CC | GO:0005669 | transcription factor TFIIID complex         | 17735 | 20   | 2487 | 7   | 2.82   | 0.01576 | 2.48227  | TAF1;TAF10;TAF3;TAF6;TAF8;TBP;TP53                                                                  |
| blue  | MF | GO:0004540 | ribonuclease activity                       | 17735 | 68   | 2487 | 17  | 9.89   | 0.01578 | 1.718908 | CPFS3;DBR1;DIS3L;DROSHA;EXOSC10;FEN1;MRPL44;PAN2;PARN;POP1;RNASE2;RNASE3;RNASE4;RNASEH1;            |
| blue  | CC | GO:0008180 | signalosome                                 | 17735 | 34   | 2487 | 10  | 4.79   | 0.0158  | 2.087683 | AMOTL1;ATP5A1;COP57B;DOCK7;EPB41L2;HSP90A1;HSPA1L;PLCG1;VPRBP;WDR6                                  |
| blue  | CC | GO:0043209 | myelin sheath                               | 17735 | 34   | 2487 | 10  | 4.79   | 0.0158  | 2.087683 | ANXA2;ATP1A3;BCL2;EXOC4;ITPR3;JAM3;MPZ;PLLP;SCRIB;PERLNC5                                           |
| blue  | MF | GO:0030971 | receptor tyrosine kinase binding            | 17735 | 33   | 2487 | 10  | 4.8    | 0.01583 | 2.083333 | ARHGFE16;DNAJA3;HYAL2;IRS1;NRG1;PIK3R2;PITPNM3;PLCG1;SHC1;TP53                                      |
| blue  | MF | GO:0050662 | coenzyme binding                            | 17735 | 179  | 2487 | 37  | 26.04  | 0.01583 | 1.420891 | ACAD8;ACOX2;ACOX3;AIFM1;AIFM2;ALDH6A1;ASPDH;CREG1;D2HGDDH;DHC2R24;DHODH;DL2;DUOX1;ECI2;E            |
| blue  | MF | GO:0051020 | GTPase binding                              | 17735 | 145  | 2487 | 31  | 21.1   | 0.0163  | 1.469194 | ALS2CL;ANXA2;ARHGEF16;BICD1;CCDC64;CDC42BPB;DIAFH1;DOK10;DOCK7;DOCK9;EXO2;FGD1;FLNA;FN              |
| blue  | MF | GO:0005543 | phospholipid binding                        | 17735 | 487  | 2487 | 88  | 70.85  | 0.01672 | 1.242061 | AGAP5;AGAP6;AKT2;AKT3;ANXA2;ANXA6;APBA1;ARHGAP15;ARHGAP32;ARHGAP33;ARHGFE1;ARHGFE16;A               |
| blue  | MF | GO:0032947 | protein complex scaffold                    | 17735 | 48   | 2487 | 13  | 6.98   | 0.01705 | 1.862464 | AXIN1;BAZ1B;CAPN3;CD3E;CHCHD3;EIF3B;LAMTOR1;LDRAP1;MAPK8IP3;MMS19;NUP62;SHANK1;SMARCC               |
| blue  | CC | GO:0000242 | pericentriolar material                     | 17735 | 12   | 2487 | 5   | 1.69   | 0.01846 | 2.95858  | AKAP9;CDKSRA2;LCK;PCM1;TCP1                                                                         |
| blue  | CC | GO:0000782 | telomere cap complex                        | 17735 | 12   | 2487 | 5   | 1.69   | 0.01846 | 2.95858  | CTC1;TERF2;TERF2IP;XRCC5;XRCC6                                                                      |
| blue  | CC | GO:0000783 | nuclear telomere cap complex                | 17735 | 12   | 2487 | 5   | 1.69   | 0.01846 | 2.95858  | CTC1;TERF2;TERF2IP;XRCC5;XRCC6                                                                      |
| blue  | MF | GO:0003887 | DNA-directed DNA polymerase activity        | 17735 | 29   | 2487 | 9   | 4.22   | 0.01846 | 2.132701 | MYBBP1A;PAPD7;POLA1;POLA2;POLB;POLE;POLE3;POLG;POLH                                                 |
| blue  | CC | GO:0005743 | mitochondrial inner membrane                | 17735 | 347  | 2487 | 63  | 48.86  | 0.01914 | 1.289398 | ACAA2;ACSL5;AFG3L2;AIFM1;AK2;ALDH18A1;ALDH3A2;APOOL;ATP5A1;ATP5B;ATP5J;ATP5J2;BDH1;CHCHD:           |
| blue  | MF | GO:0016667 | oxidoreductase activity, acting on a sul... | 17735 | 54   | 2487 | 14  | 7.86   | 0.01988 | 1.78117  | DL2;ENOX2;GSTO1;MSRB2;MSRB3;NXN;PCYOX1;PCYOX1L;PDIA3;PDIA4;PDIA5;PDIA6;TXN;TXNRD3                   |
| blue  | MF | GO:0017025 | TBP-class protein binding                   | 17735 | 16   | 2487 | 6   | 2.33   | 0.0204  | 2.575107 | CAND2;GTF2A2;HHEX;TAF1;THRA;YEATS2                                                                  |
| blue  | MF | GO:0030331 | estrogen receptor binding                   | 17735 | 25   | 2487 | 8   | 3.64   | 0.02141 | 2.197802 | DDX17;DYX1C1;LEF1;MMS19;PPARGC1B;PRMT2;RNF4;TAF10                                                   |
| blue  | CC | GO:0005741 | mitochondrial outer membrane                | 17735 | 118  | 2487 | 25  | 16.62  | 0.0223  | 1.504212 | ACSL5;AIFM2;AKAP1;BAD;BCL2;BID;BRI3BP;CYB5B;HADHB;MAVS;MGST1;MLXIP;MTOR;MUL1;MYO19;PI4KE            |
| blue  | MF | GO:0016779 | nucleotidyltransferase activity             | 17735 | 120  | 2487 | 26  | 17.46  | 0.02234 | 1.489118 | ABL1;CD3EAP;DKC1;GALT;MTPAP;MYBBP1A;PAPD7;POLA1;POLA2;POLB;POLE;POLE3;POLG;POLH;POLR1A;P            |
| blue  | CC | GO:0016605 | PML body                                    | 17735 | 73   | 2487 | 17  | 10.28  | 0.02311 | 1.653696 | BLM;CBX5;CHEK2;EIF4ENF1;IKBKE;MTOR;RFD3;RNF4;RPA1;RPA2;SATB1;TCF7L2;TP53;TRIM16;UBE2I;USP           |
| blue  | CC | GO:0005876 | spindle microtubule                         | 17735 | 41   | 2487 | 11  | 5.77   | 0.02324 | 1.906412 | ARL3;CALM3;CDC16;KIF3B;KIF4A;KNTC1;NEIL2;NUMA1;POLB;PRC1;ZW10                                       |
| blue  | MF | GO:0004715 | non-membrane spanning protein tyrosine k... | 17735 | 45   | 2487 | 12  | 6.55   | 0.02415 | 1.832061 | ABL1;ABL2;BAZ1B;FYN;LCK;PEAK1;PTK2;SGK23;STK16;TNK2;TXK;TYK2                                        |
| blue  | CC | GO:0019866 | organelle inner membrane                    | 17735 | 377  | 2487 | 67  | 53.09  | 0.02482 | 1.262008 | ACAA2;ACSL5;AFG3L2;AIFM1;AK2;ALDH18A1;ALDH3A2;APOOL;ATP5A1;ATP5B;ATP5J;ATP5J2;BDH1;CHCHD:           |
| blue  | MF | GO:0051082 | unfolded protein binding                    | 17735 | 127  | 2487 | 27  | 18.48  | 0.02541 | 1.461039 | AFG3L2;CALR;CTC3;CCT6A;CCT7;CCT8;DNAJA3;DNAJA4;DNAJB1;DNAJB12;DNAJC1;DNAJC12;DNAJC16:               |
| blue  | CC | GO:0005811 | lipid particle                              | 17735 | 42   | 2487 | 11  | 5.91   | 0.0276  | 1.861252 | AIFM2;ANXA2;GOS2;IRAK1;LSS;METTL7A;NSDHL;PLIN2;PRPF19;SCCPDH;SIGMAR1                                |
| blue  | CC | GO:0044665 | MLL1/2 complex                              | 17735 | 27   | 2487 | 8   | 3.8    | 0.02831 | 2.105263 | HCFC1;LAS1L;MGA;MLL;RUVBL1;TAF1;TAF6;TEX10                                                          |
| blue  | CC | GO:0071339 | MLL1 complex                                | 17735 | 27   | 2487 | 8   | 3.8    | 0.02831 | 2.105263 | HCFC1;LAS1L;MGA;MLL;RUVBL1;TAF1;TAF6;TEX10                                                          |
| blue  | CC | GO:0031519 | PcG protein complex                         | 17735 | 37   | 2487 | 10  | 5.21   | 0.02834 | 1.919386 | ASXL1;CBX2;CBX7;CSNK2A2;EZH1;KDM2B;PCGF1;PHC1;RBBP4;RBBP7                                           |
| blue  | MF | GO:0042625 | ATPase activity, coupled to transmembran... | 17735 | 67   | 2487 | 16  | 9.75   | 0.02844 | 1.641026 | ATP10A;ATP13A1;ATP13A2;ATP13A3;ATP1B3;ATP2A2;ATP2A3;ATP5A1;ATP5B;ATP6V0E1;ATP6V1F;ATP6V1H;A         |
| blue  | MF | GO:0000217 | DNA secondary structure binding             | 17735 | 13   | 2487 | 5   | 1.89   | 0.03025 | 2.645503 | BLM;ERCC5;MSH6;RAD18;XPC                                                                            |
| blue  | MF | GO:0016888 | endodeoxyribonuclease activity, produc...   | 17735 | 13   | 2487 | 5   | 1.89   | 0.03025 | 2.645503 | DNASE1;FAN1;FEN1;SLX4;TATDN2                                                                        |
| blue  | MF | GO:0034593 | phosphatidylinositol bisphosphate phosph... | 17735 | 13   | 2487 | 5   | 1.89   | 0.03025 | 2.645503 | INPP4A;INPP5B;INPP5E;OCLR;SYNJ2                                                                     |
| blue  | MF | GO:0070742 | C2H2 zinc finger domain binding             | 17735 | 13   | 2487 | 5   | 1.89   | 0.03025 | 2.645503 | LEF1;MBD2;SRM2;U2AF2;ZDC                                                                            |
| blue  | MF | GO:0008022 | protein C-terminus binding                  | 17735 | 158  | 2487 | 32  | 22.99  | 0.03067 | 1.39191  | ABL1;ATP2A2;AXIN1;BCL10;CADM1;CITA;DLG3;DNM1;DST;ERCC3;HIC2;HSPG2;LCK;MAP2K7;MDC1;MYO1C             |
| blue  | CC | GO:0032587 | ruffle membrane                             | 17735 | 59   | 2487 | 14  | 8.31   | 0.03195 | 1.684717 | AIF1;AKT2;ARHGFE4;DIAH1;EPHA2;EZR;KANK1;MACF1;NF2;PDE9A;PIP5K1;PPP1R9B;RASGRP2;THEM4                |
| blue  | MF | GO:0008135 | translation factor activity, nucleic aci... | 17735 | 79   | 2487 | 18  | 11.49  | 0.03269 | 1.56658  | ABC1F1;EEF2;EEF2K;EFTUD1;EIF1AD;EIF2B1;EIF2S3;EIF3A;EIF3B;EIF4B;EIF4G1;EIF4G2;EIF5A;EIF5B;GCN1L1;GI |
| blue  | MF | GO:0003774 | motor activity                              | 17735 | 130  | 2487 | 27  | 18.91  | 0.03338 | 1.427816 | DCTN1;DNAH1;DNHD1;DYNC1H1;DYNC1I2;DYNC1L2;DYNTL1;KIF13B;KIF16B;KIF21B;KIF3B;KIF4A;KIF5C;KLC         |
| blue  | MF | GO:0016891 | endoribonuclease activity, producing 5'...  | 17735 | 27   | 2487 | 8   | 3.93   | 0.03372 | 2.035623 | DBR1;DROSHA;FEN1;MRPL44;POP1;RNASEH1;RPP1A;RPP21                                                    |
| blue  | CC | GO:0009295 | nucleoid                                    | 17735 | 38   | 2487 | 10  | 5.35   | 0.03377 | 1.869159 | ATP5B;DNAJA3;HADHA;HADHB;HSPA9;LONP2;POLG;SUPV3L1;VDAC1;VDAC2                                       |
| blue  | MF | GO:0008168 | methyltransferase activity                  | 17735 | 177  | 2487 | 35  | 25.75  | 0.03413 | 1.359223 | ASMT;DNMT1;DNMT3A;EHMT1;EZH1;FTSJ2;FTSJ3;GART;HEMK1;IBAS7;ICMT;METTL3;METTL16;METTL2A;              |
| blue  | MF | GO:0019903 | protein phosphatase binding                 | 17735 | 74   | 2487 | 17  | 10.77  | 0.03461 | 1.578459 | ANAPCS;ANAPC7;ANKLE2;BAD;BCL2;DLG3;EIF2AK3;FLT4;HSP90B1;MAP2K7;PHACTR4;PPME1;PPP1R16B;PPI           |
| blue  | CC | GO:0030532 | small nuclear ribonucleoprotein complex     | 17735 | 33   | 2487 | 9   | 4.65   | 0.03464 | 1.935484 | DXX23;GEMIN4;LSM10;PRPF4;PRPF8;SF3B3;SNRNP200;SNRNP40;TGS1                                          |
| blue  | CC | GO:0031090 | organelle membrane                          | 17735 | 2366 | 2487 | 362 | 333.16 | 0.03626 | 1.086565 | ABCA2;ABCB1;ABL1;ACAA2;ACER2;ACSL5;AFG3L2;AGK;AGAP23;AGPAT6;AIFM1;AIFM2;AK2;AKAP1;ALDH1B;           |
| blue  | MF | GO:0030506 | ankyrin binding                             | 17735 | 18   | 2487 | 6   | 2.62   | 0.03661 | 2.290076 | FLNC;NRCAM;OBSCN;PLEC;SPTBN1;TNKS1BP1                                                               |
| blue  | MF | GO:0016881 | acid-amino acid ligase activity             | 17735 | 299  | 2487 | 55  | 43.5   | 0.03722 | 1.264368 | AMFR;ANAPCS;ARIH2;ATG10;ATG3;BIRC6;BTRC;CARNIS1;CBLB;DTL;FBXO21;FBXW2;HECTD1;HERC1;HERC2;A          |
| blue  | MF | GO:0051059 | NF-kappaB binding                           | 17735 | 23   | 2487 | 7   | 3.35   | 0.03994 | 2.089552 | BCL10;CDKN2A;DNAJA3;FAF1;HIF1AN;RELA;SETD6                                                          |
| blue  | CC | GO:0042470 | melanosome                                  | 17735 | 95   | 2487 | 20  | 13.38  | 0.0403  | 1.494768 | ANXA2;ANXA6;ATP1A1;ATP1B3;FASN;GANAB;GGH;HPS4;HSP90A1;HSP90B1;HSPA8;MLANA;PDIA3;PDIA4;I             |
| blue  | CC | GO:0048770 | pigment granule                             | 17735 | 95   | 2487 | 20  | 13.38  | 0.0403  | 1.494768 | ANXA2;ANXA6;ATP1A1;ATP1B3;FASN;GANAB;GGH;HPS4;HSP90A1;HSP90B1;HSPA8;MLANA;PDIA3;PDIA4;I             |
| blue  | CC | GO:0001741 | XY body                                     | 17735 | 10   | 2487 | 4   | 1.41   | 0.04068 | 2.836879 | RAD18;SIN3B;SMARCC1;UBE2B                                                                           |
| blue  | CC | GO:0031082 | BLOC complex                                | 17735 | 10   | 2487 | 4   | 1.41   | 0.04068 | 2.836879 | BLOC1S1;PI4K2A;SNAP47;SNAPIN                                                                        |
| blue  | CC | GO:0031083 | BLOC-1 complex                              | 17735 | 10   | 2487 | 4   | 1.41   | 0.04068 | 2.836879 | BLOC1S1;PI4K2A;SNAP47;SNAPIN                                                                        |
| blue  | CC | GO:0032300 | mismatch repair complex                     | 17735 | 10   | 2487 | 4   | 1.41   | 0.04068 | 2.836879 | BLOC1S1;PI4K2A;SNAP47;SNAPIN                                                                        |
| blue  | MF | GO:0019902 | phosphatase binding                         | 17735 | 115  | 2487 | 24  | 16.73  | 0.04087 | 1.434549 | ANAPCS;ANAPC7;ANKLE2;BAD;BCL2;CHCHD3;CRY2;CSRNP2;DLG3;EIF2AK3;ELFN2;FLT4;HSP90B1;MAP2K7;P           |
| blue  | MF | GO:0052742 | phosphatidylinositol kinase activity        | 17735 | 14   | 2487 | 5   | 2.04   | 0.04156 | 2.45098  | ATM;PI4K2A;PI4KA;PI4KB;PIK3R2                                                                       |
| blue  | MF | GO:0000049 | tRNA binding                                | 17735 | 33   | 2487 | 9   | 4.8    | 0.04163 | 1.875    | AARS;AARS2;DARS2;EIF2AK4;KARS;MARS;NSUN2;XPO5;YARS                                                  |
| blue  | MF | GO:0000287 | magnesium ion binding                       | 17735 | 180  | 2487 | 35  | 26.19  | 0.04241 | 1.336388 | ABL1;ABL2;ADSS;ATP10A;ATP8B1;ATP8B2;ATP9B;BRSK2;CDC42BPA;CDC42BPB;CDC42BPG;CERK;ENO2;EPH            |
| blue  | CC | GO:0000784 | nuclear chromosome, telomeric region        | 17735 | 24   | 2487 | 7   | 3.38   | 0.04251 | 2.071006 | CTC1;SLX4;TERF2;TERF2IP;TNKS1BP1;XRCC5;XRCC6                                                        |
| blue  | MF | GO:0016829 | lyase activity                              | 17735 | 151  | 2487 | 30  | 21.97  | 0.04449 | 1.365498 | ACO2;ADY3;ADCY6;ADCY7;ADCY9;AGXT2L2;ALAD;DERA;ECHDC2;ENO2;FASN;FH;GGCX;GOT1;GUCY2D;HA2              |
| blue  | MF | GO:0034595 | phosphatidylinositol phosphate 5-phospha... | 17735 | 10   | 2487 | 4   | 1.45   | 0.04523 | 2.758621 | INPP5B;INPP5E;OCLR;SYNJ2                                                                            |
| blue  | MF | GO:0036002 | pre-mRNA binding                            | 17735 | 10   | 2487 | 4   | 1.45   | 0.04523 | 2.758621 | AQR;HNRNP2B1;PTBP1;ZRSR2                                                                            |
| blue  | MF | GO:0070016 | armadillo repeat domain binding             | 17735 | 10   | 2487 | 4   | 1.45   | 0.04523 | 2.758621 | AXIN1;AXIN2;LEF1;TCF7L2                                                                             |
| blue  | CC | GO:0072686 | mitotic spindle                             | 17735 | 15   | 2487 | 5   | 2.11   | 0.04881 | 2.369668 | DIAFH1;MAP4;RACGAP1;TADA2A;YEATS2                                                                   |
| blue  | CC | GO:0016592 | mediator complex                            | 17735 | 35   | 2487 | 9   | 4.93   | 0.04904 | 1.825558 | MED11;MED24;MED27;MED29;MED30;MED31;MED6;PPARGC1B;RBM14                                             |
| black | BP | GO:0043170 | macromolecule metabolic process             | 17735 | 7334 | 228  | 120 | 95.33  | 0.00019 | 1.258785 | ACY1;ADAT3;AKT1S1;AMH;AMN;APBA3;ASCL2;BOP1;BRSK1;C1orf85;CS;CBX4;CCDC85B;CDK16;CEBPB;CEBP           |
| black | MF | GO:0003677 | DNA binding                                 | 17735 | 2332 | 228  | 48  | 31.17  | 0.0012  | 1.539942 | ASCL2;C1orf85;CBX4;CEBPB;CEBPD;CENPB;CWC22;GLI4;H1FX;H2AFX;HES4;HIC1;HMGG20B;JUNB;JUND;KLF2;        |
| black | MF | GO:0046914 | transition metal ion binding                | 17735 | 2217 | 228  | 46  | 29.63  | 0.0013  | 1.552481 | ADAT3;CYLD;CYP51A1;EGLN2;GLI4;HIC1;KLF2;LOXL1;MEX3D;MIB2;MMP23B;NEURL;NPEPL1;NR2F6;OTUD7;           |
| black | BP | GO:0010467 | gene expression                             | 17735 | 4403 | 228  | 77  | 57.23  | 0.00135 | 1.345448 | ADAT3;AMH;APBA3;ASCL2;BOP1;C1orf85;CBX4;CCDC85B;CEBPB;CEBPD;CENPB;CEPNB;CLASRP;CTU1;CWC22;CYLD;     |

|       |    |            |                                                |       |       |     |     |        |         |          |                                                                                                                                                                        |
|-------|----|------------|------------------------------------------------|-------|-------|-----|-----|--------|---------|----------|------------------------------------------------------------------------------------------------------------------------------------------------------------------------|
| black | BP | GO:0044260 | cellular macromolecule metabolic process       | 17735 | 6621  | 228 | 106 | 86.06  | 0.00217 | 1.231699 | ADAT3;AKT1S1;AMH;ASCL2;BOP1;BRSK1;C1orf85;C5;CBX4;CCDC85B;CDK16;CEBPB;CEBPD;CENPB;CLASRP;C                                                                             |
| black | MF | GO:0008270 | zinc ion binding                               | 17735 | 1977  | 228 | 41  | 26.42  | 0.0025  | 1.551855 | ADAT3;CYLD;GLI4;HIC1;KLF2;MEX3D;MIB2;MMP23B;NEURL;NR2F6;OTUD7A;PEX10;PGLYRP2;PRDM8;REPIN                                                                               |
| black | BP | GO:0008630 | intrinsic apoptotic signaling pathway in in... | 17735 | 45    | 228 | 4   | 0.58   | 0.00272 | 6.896552 | BBC3;HIC1;MBD4;UACA                                                                                                                                                    |
| black | MF | GO:0019783 | small conjugating protein-specific prote...    | 17735 | 52    | 228 | 4   | 0.69   | 0.0051  | 5.797101 | CYLD;UFSP1;UFSP2;USP33                                                                                                                                                 |
| black | BP | GO:0032526 | response to retinoic acid                      | 17735 | 92    | 228 | 5   | 1.2    | 0.00695 | 4.166667 | GDAP1;OVACA2;OXT;WNT6;ZNF35                                                                                                                                            |
| black | BP | GO:0009296 | flagellum assembly                             | 17735 | 10    | 228 | 2   | 0.13   | 0.00706 | 15.38462 | BBS5;NEURL                                                                                                                                                             |
| black | BP | GO:0014061 | regulation of norepinephrine secretion         | 17735 | 12    | 228 | 2   | 0.16   | 0.01018 | 12.5     | C5;OXT                                                                                                                                                                 |
| black | BP | GO:0043064 | flagellum organization                         | 17735 | 12    | 228 | 2   | 0.16   | 0.01018 | 12.5     | BBS5;NEURL                                                                                                                                                             |
| black | MF | GO:0016790 | thiolester hydrolase activity                  | 17735 | 102   | 228 | 5   | 1.36   | 0.0119  | 3.676471 | ACOT2;CYLD;UFSP1;UFSP2;USP33                                                                                                                                           |
| black | BP | GO:0048243 | norepinephrine secretion                       | 17735 | 13    | 228 | 2   | 0.17   | 0.01193 | 11.76471 | C5;OXT                                                                                                                                                                 |
| black | BP | GO:1901362 | organic cyclic compound biosynthetic pro...    | 17735 | 3752  | 228 | 63  | 48.77  | 0.01224 | 1.291778 | AMH;ASCL2;C1orf85;CBX4;CCDC85B;CEBPB;CEBPD;CENPB;CHCHD10;CYLD;CYP51A1;EGLN2;EID2;GMPPB;GF                                                                              |
| black | MF | GO:0016594 | glycine binding                                | 17735 | 13    | 228 | 2   | 0.17   | 0.0126  | 11.76471 | GRIN1;GRIN3B                                                                                                                                                           |
| black | BP | GO:0046717 | acid secretion                                 | 17735 | 38    | 228 | 3   | 0.49   | 0.01306 | 6.122449 | KISS1R;OXT;UCN                                                                                                                                                         |
| black | BP | GO:0016070 | RNA metabolic process                          | 17735 | 3911  | 228 | 65  | 50.83  | 0.01345 | 1.278772 | ADAT3;AMH;ASCL2;BOP1;C1orf85;CBX4;CCDC85B;CEBPB;CEBPD;CENPB;CLASRP;CTU1;CWC22;CYLD;EGLN2;                                                                              |
| black | BP | GO:0006957 | complement activation, alternative pathw...    | 17735 | 14    | 228 | 2   | 0.18   | 0.0138  | 11.11111 | C5;CFD                                                                                                                                                                 |
| black | BP | GO:0051205 | protein insertion into membrane                | 17735 | 14    | 228 | 2   | 0.18   | 0.0138  | 11.11111 | BBC3;GRIN3B                                                                                                                                                            |
| black | CC | GO:0030313 | cell envelope                                  | 17735 | 14    | 228 | 2   | 0.18   | 0.014   | 11.11111 | GRIN1;GRIN3B                                                                                                                                                           |
| black | CC | GO:0044462 | external encapsulating structure part          | 17735 | 14    | 228 | 2   | 0.18   | 0.014   | 11.11111 | GRIN1;GRIN3B                                                                                                                                                           |
| black | MF | GO:0008234 | cysteine-type peptidase activity               | 17735 | 147   | 228 | 6   | 1.96   | 0.0141  | 3.061224 | CYLD;OTUD7A;RCE1;UFSP1;UFSP2;USP33                                                                                                                                     |
| black | MF | GO:0017091 | AU-rich element binding                        | 17735 | 14    | 228 | 2   | 0.19   | 0.0146  | 10.52632 | EXOSC9;MEX3D                                                                                                                                                           |
| black | BP | GO:0018130 | heterocycle biosynthetic process               | 17735 | 3650  | 228 | 61  | 47.44  | 0.0154  | 1.285835 | AMH;ASCL2;C1orf85;CBX4;CCDC85B;CEBPB;CEBPD;CENPB;CHCHD10;CYLD;EGLN2;EID2;GMPPB;GRIN1;HES4                                                                              |
| black | BP | GO:0034654 | nucleobase-containing compound biosynthe...    | 17735 | 3583  | 228 | 60  | 46.57  | 0.01575 | 1.288383 | AMH;ASCL2;C1orf85;CBX4;CCDC85B;CEBPB;CEBPD;CENPB;CHCHD10;CYLD;EGLN2;EID2;GMPPB;GRIN1;HES4                                                                              |
| black | BP | GO:0015874 | norepinephrine transport                       | 17735 | 15    | 228 | 2   | 0.19   | 0.01579 | 10.52632 | C5;OXT                                                                                                                                                                 |
| black | CC | GO:0000315 | organellar large ribosomal subunit             | 17735 | 15    | 228 | 2   | 0.2    | 0.016   | 10       | MRPL10;MRPL41                                                                                                                                                          |
| black | CC | GO:0005762 | mitochondrial large ribosomal subunit          | 17735 | 15    | 228 | 2   | 0.2    | 0.016   | 10       | MRPL10;MRPL41                                                                                                                                                          |
| black | MF | GO:001664  | G-protein coupled receptor binding             | 17735 | 195   | 228 | 7   | 2.61   | 0.016   | 2.681992 | C5;CALY;NPB;OXT;UCN;USP33;WNT6                                                                                                                                         |
| black | BP | GO:0097190 | apoptotic signaling pathway                    | 17735 | 202   | 228 | 7   | 2.63   | 0.01653 | 2.661597 | BBC3;CYLD;HIC1;MBD4;STK11;TRADD;UACA                                                                                                                                   |
| black | BP | GO:1900117 | regulation of execution phase of apoptos...    | 17735 | 202   | 228 | 7   | 2.63   | 0.01653 | 2.661597 | BBC3;CYLD;HIC1;MBD4;STK11;TRADD;UACA                                                                                                                                   |
| black | BP | GO:0034645 | cellular macromolecule biosynthetic proc...    | 17735 | 4170  | 228 | 68  | 54.2   | 0.01709 | 1.254613 | AMH;ASCL2;C1orf85;CBX4;CCDC85B;CEBPB;CEBPD;CENPB;CYLD;EGLN2;EID2;GMPPB;GPA1;GRIN1;HES4;H                                                                               |
| black | BP | GO:0097193 | intrinsic apoptotic signaling pathway          | 17735 | 116   | 228 | 5   | 1.51   | 0.01771 | 3.311258 | BBC3;HIC1;MBD4;STK11;UACA                                                                                                                                              |
| black | BP | GO:0009226 | nucleotide-sugar biosynthetic process          | 17735 | 16    | 228 | 2   | 0.21   | 0.01789 | 9.52381  | GMPPB;UGP2                                                                                                                                                             |
| black | BP | GO:0042347 | negative regulation of NF-kappaB import ...    | 17735 | 16    | 228 | 2   | 0.21   | 0.01789 | 9.52381  | CYLD;UACA                                                                                                                                                              |
| black | BP | GO:0009314 | response to radiation                          | 17735 | 305   | 228 | 9   | 3.96   | 0.01838 | 2.272727 | BRSK1;GRIN1;H2AFX;JUNB;JUND;MBD4;NR2F6;STK11;UACA                                                                                                                      |
| black | MF | GO:0003676 | nucleic acid binding                           | 17735 | 3299  | 228 | 57  | 44.09  | 0.0187  | 1.29281  | ASCL2;C1orf85;CBX4;CEBPB;CEBPD;CENPB;CTU1;CWC22;EXOSC6;EXOSC9;GLI4;H1FX;H2AFX;HES4;HIC1;HM1                                                                            |
| black | MF | GO:0005488 | binding                                        | 17735 | 11799 | 228 | 170 | 157.68 | 0.0188  | 1.078133 | ACOT2;ACY1;ADAT3;AKT1S1;ALKBH6;AMH;ANGPTL6;APBA3;ASCL2;ATP6V1E1;BBC3;BBS5;BOP1;BRSK1;C1orf85;CBX4;CCDC85B;CEBPB;CEBPD;CENPB;CYLD;EGLN2;EID2;GRIN1;HES4;HIC1;HMG20B;INI |
| black | BP | GO:0006351 | transcription, DNA-dependent                   | 17735 | 3208  | 228 | 54  | 41.7   | 0.02079 | 1.294964 | AMH;ASCL2;C1orf85;CBX4;CCDC85B;CEBPB;CEBPD;CENPB;CYLD;EGLN2;EID2;GRIN1;HES4;HIC1;HMG20B;INI                                                                            |
| black | CC | GO:0030312 | external encapsulating structure               | 17735 | 17    | 228 | 2   | 0.22   | 0.021   | 9.090909 | GRIN1;GRIN3B                                                                                                                                                           |
| black | MF | GO:0042165 | neurotransmitter binding                       | 17735 | 17    | 228 | 2   | 0.23   | 0.0212  | 8.695652 | GRIN1;GRIN3B                                                                                                                                                           |
| black | BP | GO:0019438 | aromatic compound biosynthetic process         | 17735 | 3638  | 228 | 60  | 47.29  | 0.02139 | 1.268767 | AMH;ASCL2;C1orf85;CBX4;CCDC85B;CEBPB;CEBPD;CENPB;CHCHD10;CYLD;EGLN2;EID2;GMPPB;GRIN1;HES4                                                                              |
| black | MF | GO:0016278 | lysine N-methyltransferase activity            | 17735 | 45    | 228 | 3   | 0.6    | 0.0221  | 5        | METTL21A;PRDM8;SUV420H2                                                                                                                                                |
| black | MF | GO:0016279 | protein-lysine N-methyltransferase activ...    | 17735 | 45    | 228 | 3   | 0.6    | 0.0221  | 5        | METTL21A;PRDM8;SUV420H2                                                                                                                                                |
| black | BP | GO:0009059 | macromolecule biosynthetic process             | 17735 | 4294  | 228 | 69  | 55.81  | 0.02236 | 1.236338 | AMH;ASCL2;C1orf85;CBX4;CCDC85B;CEBPB;CEBPD;CENPB;CYLD;EGLN2;EID2;GMPPB;GPA1;GRIN1;HES4;H                                                                               |
| black | BP | GO:0070536 | protein K63-linked deubiquitination            | 17735 | 18    | 228 | 2   | 0.23   | 0.02243 | 8.695652 | CYLD;USP33                                                                                                                                                             |
| black | BP | GO:0044271 | cellular nitrogen compound biosynthetic ...    | 17735 | 3726  | 228 | 61  | 48.43  | 0.02337 | 1.25955  | AMH;ASCL2;C1orf85;CBX4;CCDC85B;CEBPB;CEBPD;CENPB;CHCHD10;CYLD;EGLN2;EID2;GMPPB;GRIN1;HES4                                                                              |
| black | MF | GO:0004970 | ionotropic glutamate receptor activity         | 17735 | 18    | 228 | 2   | 0.24   | 0.0236  | 8.333333 | GRIN1;GRIN3B                                                                                                                                                           |
| black | BP | GO:0018022 | peptidyl-lysine methylation                    | 17735 | 19    | 228 | 2   | 0.25   | 0.02485 | 8        | METTL21A;SUV420H2                                                                                                                                                      |
| black | MF | GO:0003700 | sequence-specific DNA binding transcript...    | 17735 | 996   | 228 | 21  | 13.31  | 0.0256  | 1.577761 | ASCL2;C1orf85;CEBPB;CEBPD;HIC1;HMG20B;JUNB;JUND;KLF2;MYPOP;NPAS1;NR2F6;SNAPC2;TBX6;USF2;ZF                                                                             |
| black | BP | GO:0042308 | negative regulation of protein import in...    | 17735 | 49    | 228 | 3   | 0.64   | 0.02572 | 4.6875   | CYLD;FAM89B;UACA                                                                                                                                                       |
| black | MF | GO:0001071 | nucleic acid binding transcription facto...    | 17735 | 998   | 228 | 21  | 13.34  | 0.0261  | 1.574213 | ASCL2;C1orf85;CEBPB;CEBPD;HIC1;HMG20B;JUNB;JUND;KLF2;MYPOP;NPAS1;NR2F6;SNAPC2;TBX6;USF2;ZF                                                                             |
| black | MF | GO:0005234 | extracellular-glutamate-gated ion channe...    | 17735 | 19    | 228 | 2   | 0.25   | 0.0262  | 8        | GRIN1;GRIN3B                                                                                                                                                           |
| black | BP | GO:0071704 | organic substance metabolic process            | 17735 | 8996  | 228 | 130 | 116.93 | 0.02787 | 1.111776 | ACOT2;ACY1;ADAT3;AKT1S1;AMH;AMN;APBA3;ASCL2;BOP1;BRSK1;C1orf85;C5;CBX4;CCDC85B;CDK16;CEBF                                                                              |
| black | CC | GO:0000178 | exosome (RNase complex)                        | 17735 | 20    | 228 | 2   | 0.26   | 0.028   | 7.692308 | EXOSC6;EXOSC9                                                                                                                                                          |
| black | BP | GO:0007218 | neuropeptide signaling pathway                 | 17735 | 89    | 228 | 4   | 1.16   | 0.02871 | 3.448276 | KISS1R;NPB;PCSK1N;UCN                                                                                                                                                  |
| black | MF | GO:0008093 | cytoskeletal adaptor activity                  | 17735 | 20    | 228 | 2   | 0.27   | 0.0288  | 7.407407 | GAS2L1;NCK2                                                                                                                                                            |
| black | BP | GO:0010468 | regulation of gene expression                  | 17735 | 3347  | 228 | 55  | 43.5   | 0.03024 | 1.264368 | AMH;APBA3;ASCL2;C1orf85;CBX4;CCDC85B;CEBPB;CENPB;CYLD;EGLN2;EID2;GAS2L1;GRIN1;HES4;H                                                                                   |
| black | BP | GO:0090304 | nucleic acid metabolic process                 | 17735 | 4431  | 228 | 70  | 57.59  | 0.03066 | 1.215489 | ADAT3;AMH;ASCL2;BOP1;C1orf85;CBX4;CCDC85B;CEBPB;CEBPD;CENPB;CYLD;EGLN2;EID2;GRIN1;HES4;HIC1;HMG20B;INI                                                                 |
| black | BP | GO:0042035 | regulation of cytokine biosynthetic proc...    | 17735 | 91    | 228 | 4   | 1.18   | 0.03082 | 3.389831 | CEBPB;HSPB1;LTB;ZFPM1                                                                                                                                                  |
| black | BP | GO:0017015 | regulation of transforming growth factor...    | 17735 | 92    | 228 | 4   | 1.2    | 0.0319  | 3.333333 | EID2;FAM89B;SKOR1;STK11                                                                                                                                                |
| black | BP | GO:0051668 | localization within membrane                   | 17735 | 22    | 228 | 2   | 0.29   | 0.03274 | 6.896552 | BBC3;GRIN3B                                                                                                                                                            |
| black | BP | GO:0006355 | regulation of transcription, DNA-depende...    | 17735 | 2869  | 228 | 48  | 37.29  | 0.03298 | 1.287208 | AMH;ASCL2;C1orf85;CBX4;CCDC85B;CEBPB;CENPB;CYLD;EGLN2;EID2;GRIN1;HES4;HIC1;HMG20B;INI                                                                                  |
| black | BP | GO:0046823 | RNA biosynthetic process                       | 17735 | 3293  | 228 | 54  | 42.8   | 0.03306 | 1.261682 | AMH;ASCL2;BOP1;C1orf85;CBX4;CCDC85B;CEBPB;CEBPD;CENPB;CYLD;EGLN2;EID2;GRIN1;HES4;HIC1;HMG20B;INI                                                                       |
| black | MF | GO:0005184 | neuropeptide hormone activity                  | 17735 | 22    | 228 | 2   | 0.29   | 0.0345  | 6.896552 | OXT;UCN                                                                                                                                                                |
| black | MF | GO:0051861 | glycolipid binding                             | 17735 | 22    | 228 | 2   | 0.29   | 0.0345  | 6.896552 | GLTPD2;GPA1                                                                                                                                                            |
| black | BP | GO:0008152 | metabolic process                              | 17735 | 9452  | 228 | 135 | 122.85 | 0.03541 | 1.098901 | ACOT2;ACY1;ADAT3;AKT1S1;AMH;AMN;APBA3;ASCL2;BBC3;BOP1;BRSK1;C1orf85;C5;CACNA1A;CBX4;CCDC                                                                               |
| black | BP | GO:0051252 | regulation of RNA metabolic process            | 17735 | 2953  | 228 | 49  | 38.38  | 0.03555 | 1.276707 | AMH;ASCL2;C1orf85;CBX4;CCDC85B;CEBPB;CENPB;CWC22;CYLD;EGLN2;EID2;GRIN1;HES4;HIC1;HMG20B;INI                                                                            |
| black | BP | GO:0046823 | negative regulation of nucleocytoplasmic...    | 17735 | 56    | 228 | 3   | 0.73   | 0.03624 | 4.109589 | CYLD;FAM89B;UACA                                                                                                                                                       |
| black | BP | GO:2001141 | regulation of RNA biosynthetic process         | 17735 | 2889  | 228 | 48  | 37.55  | 0.03679 | 1.278296 | AMH;ASCL2;C1orf85;CBX4;CCDC85B;CEBPB;CENPB;CYLD;EGLN2;EID2;GRIN1;HES4;HIC1;HMG20B;INI                                                                                  |
| black | BP | GO:0060255 | regulation of macromolecule metabolic pr...    | 17735 | 4178  | 228 | 66  | 54.3   | 0.0368  | 1.21547  | AKT1S1;AMH;APBA3;ASCL2;C1orf85;C5;CBX4;CCDC85B;CEBPB;CENPB;CWC22;CYLD;DBNDD2;EGLN2;EID2;G                                                                              |
| black | BP | GO:0031326 | regulation of cellular biosynthetic proc...    | 17735 | 3328  | 228 | 54  | 43.26  | 0.03956 | 1.248266 | AMH;ASCL2;C1orf85;CBX4;CCDC85B;CEBPB;CENPB;CYLD;EGLN2;EID2;GRIN1;HES4;HIC1;HMG20B;HSPB1;INI                                                                            |

|       |    |            |                                             |       |      |     |    |       |         |          |                                                                                            |
|-------|----|------------|---------------------------------------------|-------|------|-----|----|-------|---------|----------|--------------------------------------------------------------------------------------------|
| black | BP | GO:2000112 | regulation of cellular macromolecule bio... | 17735 | 3117 | 228 | 51 | 40.51 | 0.04004 | 1.258948 | AMH;ASCL2;C1orf85;CBX4;CCDC85B;CEBPB;CENPB;CYLD;EGLN2;EID2;GRIN1;HES4;HIC1;HMG20B;HSPB1;IN |
| black | BP | GO:1901576 | organic substance biosynthetic process      | 17735 | 5154 | 228 | 79 | 66.99 | 0.04018 | 1.17928  | AMH;ASCL2;C1orf85;CBX4;CCDC85B;CEBPB;CEBPD;CENPB;CHCHD10;CSNK1G2;CYLD;CYP51A1;EGLN2;EID2;I |
| black | MF | GO:0001540 | beta-amyloid binding                        | 17735 | 24   | 228 | 2  | 0.32  | 0.0405  | 6.25     | APBA3;DLGAP3                                                                               |
| black | MF | GO:0016811 | hydrolase activity, acting on carbon-nit... | 17735 | 57   | 228 | 3  | 0.76  | 0.0406  | 3.947368 | ACY1;PDF;PGLYRP2                                                                           |
| black | BP | GO:0042108 | positive regulation of cytokine biosynth... | 17735 | 59   | 228 | 3  | 0.77  | 0.04133 | 3.896104 | HSPB1;LTB;ZFPM1                                                                            |
| black | BP | GO:0044058 | regulation of digestive system process      | 17735 | 25   | 228 | 2  | 0.32  | 0.04145 | 6.25     | OXT;UCN                                                                                    |
| black | BP | GO:0010556 | regulation of macromolecule biosynthetic... | 17735 | 3197 | 228 | 52 | 41.55 | 0.04191 | 1.251504 | AMH;ASCL2;C1orf85;CBX4;CCDC85B;CEBPB;CENPB;CYLD;EGLN2;EID2;GRIN1;HES4;HIC1;HMG20B;HSPB1;IN |
| black | BP | GO:0090287 | regulation of cellular response to growt... | 17735 | 146  | 228 | 5  | 1.9   | 0.04193 | 2.631579 | EID2;FAM89B;FGFBP3;SKOR1;STK11                                                             |
| black | BP | GO:0042089 | cytokine biosynthetic process               | 17735 | 101  | 228 | 4  | 1.31  | 0.04267 | 3.053435 | CEBPB;HSPB1;LTB;ZFPM1                                                                      |
| black | CC | GO:0043679 | axon terminus                               | 17735 | 59   | 228 | 3  | 0.78  | 0.043   | 3.846154 | GRIN1;OXT;UCN                                                                              |
| black | BP | GO:0000291 | nuclear-transcribed mRNA catabolic proce... | 17735 | 26   | 228 | 2  | 0.34  | 0.04453 | 5.882353 | EXOSC6;EXOSC9                                                                              |
| black | BP | GO:0032570 | response to progesterone stimulus           | 17735 | 26   | 228 | 2  | 0.34  | 0.04453 | 5.882353 | JUNB;OXT                                                                                   |
| black | BP | GO:0043114 | regulation of vascular permeability         | 17735 | 26   | 228 | 2  | 0.34  | 0.04453 | 5.882353 | FGFBP3;UCN                                                                                 |
| black | BP | GO:0043928 | exonucleolytic nuclear-transcribed mRNA ... | 17735 | 26   | 228 | 2  | 0.34  | 0.04453 | 5.882353 | EXOSC6;EXOSC9                                                                              |
| black | BP | GO:0045933 | positive regulation of muscle contractio... | 17735 | 26   | 228 | 2  | 0.34  | 0.04453 | 5.882353 | OXT;UCN                                                                                    |
| black | BP | GO:0034470 | ncRNA processing                            | 17735 | 198  | 228 | 6  | 2.57  | 0.0448  | 2.33463  | ADAT3;BOP1;CTU1;EXOSC6;EXOSC9;RPP25                                                        |
| black | BP | GO:0009889 | regulation of biosynthetic process          | 17735 | 3356 | 228 | 54 | 43.62 | 0.04544 | 1.237964 | AMH;ASCL2;C1orf85;CBX4;CCDC85B;CEBPB;CENPB;CYLD;EGLN2;EID2;GRIN1;HES4;HIC1;HMG20B;HSPB1;IN |
| black | CC | GO:0000785 | chromatin                                   | 17735 | 300  | 228 | 8  | 3.96  | 0.046   | 2.020202 | CEBPB;HIFX;H2AFX;HIC1;INO80B;JUNB;JUND;MBD4                                                |
| black | BP | GO:0042107 | cytokine metabolic process                  | 17735 | 104  | 228 | 4  | 1.35  | 0.04666 | 2.962963 | CEBPB;HSPB1;LTB;ZFPM1                                                                      |
| black | BP | GO:0032941 | secretion by tissue                         | 17735 | 62   | 228 | 3  | 0.81  | 0.04676 | 3.703704 | NEURL;UCN;USF2                                                                             |
| black | BP | GO:0090317 | negative regulation of intracellular pro... | 17735 | 62   | 228 | 3  | 0.81  | 0.04676 | 3.703704 | CYLD;FAM89B;UACA                                                                           |
| black | MF | GO:0008066 | glutamate receptor activity                 | 17735 | 26   | 228 | 2  | 0.35  | 0.0468  | 5.714286 | GRIN1;GRIN3B                                                                               |





D3B;ATL3;ATP5D;BCS1L;BMP2K;BRAF;BUB1;BUB1B;CBR1;CD38;CDC6;CDK10;CDK12;CDK13;CELF2;CELF6;CHD7;CHTF18;CLCN4;CLPP;CRYL1;CSNK1G1;DALRD3;DCXR;DDX21;DDX28;DDX39A;DDX43;DDX49;DECR2;DGPUOK;DHDH;DHRS3;DHRS4;DHRS4L2;DNAJC17;DND1;DOM3Z;DRG2;DTYMK;DUS1L;DUS2L

5;RPS2;RPS28;RQCD1;UPF2;WIBG;ZC3HAV:

5;RPS2;RPS28;RQCD1;UPF2;WIBG

RPS28;RSF1;SP1;TCEB:

RPS28;RSF1;SP1;TCEB:

7;PSMD9;TOP2A;TP73;TPR

1L1;MAPK1;MYH10;MZT2B;NUSAP1;ROCK2;SAC3D1;SLC25A5;TADA3;THAP11;TOPBP1;TUBGCP:

AMDHD2;AMT;ANKRD23;APOE;APRT;ARFGEF1;ARFRP1;ARHGAP4;ATF4;ATL3;ATP5D;ATP5G2;ATP5G3;ATP5H;B3GALT6;B3GAT3;B4GALT2;B4GALT7;CBR1;CD36;CDS2;CEL;COQ7;COQ9;COX4I1;CPT1C;CRYL1;CYC1;CYP1B1;CYP2E1;DALRD3;DCXR;DECR2;DGPUOK;DHRS4;DSE;DTD1;DTYMK;ECI1;EHHADH;ETFB

P8

K7;DUSP10;DUSP2;DUSP3;DVL1;GNB2L1;HIPK3;HRAS;KIDINS220;LAMTOR2;LATS1;LATS2;LIME1;LPAR1;MAGI3;MAP3K10;MAP4K2;MAPK1;MAPK11;NF1;NPRL2;P2RX7;PDE6G;PFKFB2;PIK3CB;PIK3CG;PREB;PRKAR2A;PTPRC;SPRED2;SSR1;TAOK3;TNFAIP3;TNFRSF4;TNFSF15;TP73;TRAF2;TRAF4;TRAF6;TRIB3

3CG;PIP5K1A;PIPSK1B;PLA2G6;PMVK;PTDSS2;SLC44A1;SPHK2;TAZ;ZP:

VB2L1;HPX;IRF3;KAT2A;KRT18;MAGI3;MAPK1;MICB;NUP153;POLR2F;POLR2G;POLR2L;PSMA7;PSMB4;PSMB5;PSMB7;RPL13;RPL18;RPL18A;RPL28;RPL29;RPL38;RPL8;RPL1;RPLP2;RPS15;RPS2;RPS28;RSF1;SIVA1;SLC25A5;SLC25A6;SP1;TCEB2;THOC6;TOP1;TOP2A;UCKL1;ZC3HAV

4G3;GADD45GIP1;GNB2L1;GTF2A1;HPX;IRF3;KAT2A;KRT18;MAGI3;MAPK1;MICB;MZF1;NUP153;POLR2F;POLR2G;POLR2L;POLR2L;PSMA7;PSMB4;PSMB5;PSMB7;PSMD9;RPL13;RPL18;RPL18A;RPL28;RPL29;RPL38;RPL8;RPL1;RPLP2;RPS15;RPS2;RPS28;RSF1;SIVA1;SLC25A5;SLC25A6;SP1;TCEB2;THOC6;TO

LRMT;TUT:

4G3;GADD45GIP1;GNB2L1;GTF2A1;HPX;IRF3;KAT2A;KRT18;MAGI3;MAPK1;MICB;MZF1;NUP153;POLR2F;POLR2G;POLR2L;POLR2L;PSMA7;PSMB4;PSMB5;PSMB7;PSMD9;RPL13;RPL18;RPL18A;RPL28;RPL29;RPL38;RPL8;RPL1;RPLP2;RPS15;RPS2;RPS28;RSF1;SIVA1;SLC25A5;SLC25A6;SP1;TCEB2;THOC6;TO

RPLP1;RPLP2;RPS15;RPS2;RPS28;RQCD1;UPF2;WIBG;ZC3HAV:

EF1;ARFRP1;ARNTL;ASPCR1;ATG4D;ATP6V0E2;ATP6V1C1;BUB1B;CANX;CCDC101;CCHCR1;CD36;CEL;CENPF;CHMP4A;CHMP6;CIB1;CLASP1;CPSF2;CRB3;CREB3;CUTA;DDX39A;DOK7;DVL1;ERP29;EXOC6B;FBXW11;GAPVD1;GET4;GFER;GGA1;GNB2L1;GRASP;HINFP;HOOK3;IPO8;KCNN4;KIF20A;KRT18;LAM

3;DHRS4;DHRS4L2;DUS1L;DUS2L;DUS3L;EHHADH;FADS3;FDXR;GCDH;GFER;GPX4;GSTT1;HSD11B1L;HSD17B1;HSD17B12;HSD17B8;KDM3A;KDM5A;KDM6A;LEPRE1;LEPREL2;MECR;NDOR1;NDUFA13;NDUFA3;NDUFA8;NDUFB10;NDUFB7;NDUFB8;NDUFB9;NDUFS6;NDUFS7;NDUFS8;NDUFV1;OGFOD2;P4H

K7;DUSP10;DUSP2;DUSP3;DVL1;GNB2L1;HIPK3;HRAS;KIDINS220;LAMTOR2;LATS1;LATS2;LIME1;LPAR1;MAGI3;MAP3K10;MAP4K2;MAPK1;MAPK11;NF1;P2RX7;PDE6G;PIK3CB;PIK3CG;PREB;PRKAR2A;PTPRC;SPRED2;SSR1;TAOK3;TNFAIP3;TNFRSF4;TNFSF15;TP73;TRAF2;TRAF4;TRAF6;TRIB3;TTN;WNT7A;Z

IME1;LPAR1;MAGI3;MAP3K10;MAP4K2;MAPK1;MAPK11;NF1;P2RX7;PDE6G;PIK3CB;PIK3CG;SPRED2;TAOK3;TNFAIP3;TNFSF15;TP73;TRAF2;TRAF6;TRIB3;WNT7A;ZEB2;ZFP9:

IAPK11;NF1;P2RX7;PDE6G;PIK3CB;PIK3CG;SPRED2;TAOK3;TP73;TRAF2;TRAF6;TRIB3;WNT7A;ZEB:

B;HINFP;HRAS;MAD1L1;MCM7;PIDD;PSMA7;PSMB4;PSMB5;PSMB7;PSMD9;RAD9A;TAOK3;TOP2A;TP73;TPF

PLEKHG4;PLEKHG5;SOS1;SPATA13;STMN3;VAV:

ORA2A;AES;AFF1;AFTPH;AHCYL1;AHS2A;AIP;ALS2;ANAPC2;ANKRD23;ANKRD54;AP1G1;AP1G2;APOE;APPL2;ARFGEF1;ARFIP2;ARFRP1;ARHGAP4;ARIH1;ARL6IP4;ARNTL;ASPCR1;ASXL2;ATF4;ATF7IP;ATL3;ATP6AP2;ATP6V1C1;ATRIP;AVEN;BABAM1;BAIAP2L2;BCL7B;BCS1L;BHLHE41;BOK;BRAF;BRAT1;BRF:

SP1;CRB3;CREB3;DOK7;DVL1;ERP29;FBXW11;GET4;GFER;GGA1;GNB2L1;HOOK3;IPO8;KRT18;LAMTOR2;LATS1;LATS2;LIME1;MAPK1;MED1;NDUFA13;NF1;NFKBIL1;NIPBL;OGG1;PEX16;PEX6;PICK1;PIP5K1A;PLEKH1;RAD21;RALGAPB;RBPMS;RPL13;RPL18;RPL18A;RPL28;RPL29;RPL38;RPL8;RPL1;RPLP2;RI

:1;CLSPN;DOK7;DUSP10;DUSP2;DUSP3;DVL1;EIF4G3;FNIP2;GNB2L1;HIPK3;HPX;HRAS;KIDINS220;LAMTOR2;LATS1;LATS2;LIME1;LPAR1;MAGI3;MAP3K10;MAP4K2;MAPK1;MAPK11;MCM7;MLST8;NF1;NOG;NPRL2;NRP1;P2RX7;PDE6G;PFKFB2;PIK3CB;PIK3CG;PIN1;PLA2G6;PPP1R14A;PPP1R14B;PREB;PRK1  
SP1;CRB3;CREB3;DOK7;DVL1;ERP29;FBXW11;GET4;GFER;GGA1;GNB2L1;HOOK3;IPO8;KRT18;LAMTOR2;LATS1;LATS2;LIME1;MAPK1;MED1;NDUFA13;NF1;NFKBIL1;NIPBL;OGG1;PEX16;PEX6;PICK1;PIP5K1A;PLEKHF1;RAD21;RALGAPB;RBPMS;RPL13;RPL18;RPL18A;RPL28;RPL29;RPL38;RPL8;RPLP1;RPLP2;R  
VAI3;GNB2L1;GNG8;GNGT2;HRAS;ITPA;LSM2;LSM4;MLST8;MPG;MTG1;MUTYH;NF1;NTSC;NTHL1;NUDT1;NUDT18;OGG1;PATL1;PEX6;PICK1;PIN1;PIP5K1A;PNKP;POLD1;PXK;RAB21;RAB33A;RAC3;RALGAPB;RASA2;RC3H1;RNASEH2C;RPL13;RPL18;RPL18A;RPL28;RPL29;RPL38;RPL8;RPLP1;RPLP2;RPS15;RP  
IDUFA13;NF1;NFKBIL1;OGG1;PEX16;PEX6;RAD21;RBPMS;RPL13;RPL18;RPL18A;RPL28;RPL29;RPL38;RPL8;RPLP1;RPLP2;RPS15;RPS2;RPS28;SCARB2;SLC25A6;SSR1;SSR4;TIMM10;TIMM13;TIMM50;TLR7;TOR1AIP1;TPR;TRPS1;UBL4A;WDR24;YWH  
L1;E4F1;FSD1;GNAI3;GNB2L1;HAUS8;KIF20A;LATS1;LATS2;MAD1L1;MYH10;NCAPH;NUSAP1;PARD6G;PIK3C3;PIK3CB;PIN1;RABEP2;RAD21;RHOC;ROCK2;SAC3D1;SEPT1;SPG20;STAMBP;STRA13;TACC1;TOP1;TOP2A;TXNL4A;USP8;USP9X;WNT7  
G;GFI1;ARIH1;ARL6IP4;ARNTL;ASB3;ASB6;ASH1L;ASXL2;ATF4;ATF7IP;ATRIP;AVP1;B3GALT6;B3GAT3;B4GALT2;B4GALT7;BABAM1;BHLHE41;BRAF;BRF1;BRF2;BUB1B;C11orf30;C17orf70;C19orf10;C1orf86;C1QBP;CANX;CAPRIN1;CCDC101;CCNL2;CD36;CD38;CDC25A;CDC6;CDK12;CDK13;CEL;CELF2;CELF6;C  
FB11;NDUF87;NDUF88;NDUF89;NDUF85;NDUF58;NDUF57;NDUF56;NDUFV1;PGM2;PHK6;PHKG1;PPP1R3F;PRKAR2A;SDHAF2;SIRT3;SLC25A5;SLC25A6;STX1A;SURF1;TAZ;TBRG  
2RX6;P2RX7;PMM1;RAC3;SLC1A3;SPTBN4;STRN;TMPRSS5;TOP1;TXN2;TXNRD1;UBXN1;VPS1  
4T112;WHSC1L  
  
I1;TRMT112;WHSC1L  
  
13;VAV  
I3;GNB2L1;KCNN4;KLHL12;MAL;MYH10;NSF;P2RX7;PICK1;PIP5K1A;PLEKHF1;PREB;SEC24B;SLC25A5;SNF8;SPTBN4;SSNA1;STAM;TAZ;TIMM10;TIMM13;TIMM50;TMED9;TOR1AIP1;UBL4A;VAV3;ZFYVE2  
A1B;HERC3;KLHL12;KLHL7;MARCH9;MYLIP;NEURL2;NSMCE1;PIN1;PSMA7;PSMB4;PSMB5;PSMB7;PSMD9;RULM;RNF115;RNF169;RNF181;RNF25;RUSC1;SH3RF1;SPSB2;SPSB3;STRA13;STUB1;TCEB2;TNFAIP3;TRAF2;TRAF6;TRIB3;TRIM24;TRIP12;TSPAN17;UBA7;UBQLN1;UBXN1;ZFP5  
2;ALS2;AMDHD2;AMT;ANKRD23;APOE;APOM;APRT;ARFGEF1;ARFRP1;ARHGAP4;ATF4;ATL3;ATP5D;ATP5G2;ATP5G3;ATP5H;B3GALT6;B3GAT3;B4GALT2;B4GALT7;BTN2A1;CBR1;CD36;CDS2;CEL;COQ7;COQ9;COX4I1;CPT1C;CRYL1;CYB561D2;CYC1;CYP1B1;CYP2E1;DALRD3;DCXR;DDT;DEC2;DGUOK;DHRS3  
3XW5;FEM1B;HERC3;JOSD2;KAT2A;KLHL12;KLHL17;MARCH9;MYLIP;NEURL2;NSMCE1;PIN1;PSMA7;PSMB4;PSMB5;PSMB7;PSMD9;RULM;RNF115;RNF169;RNF181;RNF25;RUSC1;SEN2;SH3RF1;SPSB2;SPSB3;STAMBP;STRA13;STUB1;TCEB2;TNFAIP3;TRAF2;TRAF6;TRIB3;TRIM24;TRIP12;TSPAN17;UBA7;UB  
V1;PIP5K1A;PLEKHG4;PLEKHG5;PSD;RALGAPB;RASA2;SGSM3;SMAP1;SOS1;SPATA13;STMN3;TNK1;USP6NL;VAV  
  
ARNTL;ASPSR1;ATP5D;ATP5H;BUB1B;CANX;CAPRIN10;CCDC101;CCHCR1;CCS;CD36;CD38;CENPF;CHD7;CHMP4A;CHMP6;CIB1;CLASP1;CPSF2;CRB3;CREB3;DDX39A;DLGAP5;DOK7;DVL1;ERP29;EXOC68;FAM21B;FBXW11;GET4;GFER;GGA1;GIMAP5;GNB2L1;HOOK3;IPO8;KCNN4;KLHL12;KRT18;LAMTOR2;LA  
13;CLCF1;CLSPN;CSNK1G1;DGUOK;DOK7;DUSP10;DUSP2;DUSP3;DVL1;EIF4G3;FASTK;FNIP2;GLYCTK;GNB2L1;HIPK3;HPX;HRAS;KIDINS220;LAMTOR2;LATS1;LATS2;LIME1;LPAR1;LTK;MAGI3;MAP3K10;MAP4K2;MAPK1;MAPK11;MATK;MLST8;MYLK3;NF1;NOG;NPRL2;NRP1;OXSR1;P2RX7;PDE6G;PDK4;PICK  
ERLIN2;ERP44;FADS3;FAF2;FAM69B;FKBP2;HSD17B12;JAGN1;JSRP1;KRTCAP2;LMF1;LMF2;MAN1B1;MIA3;MOGS;MPDU1;NECAB3;P4HTM;PANX1;PCYT2;PEMT;PEX16;PIGQ;POMT1;PMM1L;PREB;PTDSS2;PTPLB;RAB21;SEC22B;SEC24B;SLC37A4;SOAT1;SOAT2;SPPL2A;SPPL2B;SSR1;SSR4;STS;TLR7;TM7SF2;  
I3;GNB2L1;KCNN4;KLHL12;MAL;MYH10;NSF;P2RX7;PICK1;PIP5K1A;PLEKHF1;PREB;SEC24B;SLC25A5;SNF8;SPTBN4;SSNA1;STAM;TAZ;TIMM10;TIMM13;TIMM50;TMED9;TOR1AIP1;UBL4A;VAV3;ZFYVE2  
  
4L12;KRT18;LIME1;LMF1;MAPK1;MED1;MTM1;NDUFA13;NF1;NFKBIL1;NUP153;OGG1;P2RX7;PEX16;PEX6;PIK3C3;PREB;PTPRC;RBPMS;RPL13;RPL18;RPL18A;RPL28;RPL29;RPL38;RPL8;RPLP1;RPLP2;RPS15;RPS2;RPS28;SCARB2;SEC22B;SEC24B;SLC25A6;SSR1;SSR4;THOC6;TIMM10;TIMM13;TIMM50;TLR7;  
1;PATL1;PIN1;PIP5K1A;RSRC1;SEN2;SNRPC;SPTBN4;THAP7;TIMM50;TOPBP1;TUT1;WRAP5  
i;CDC25A;CD66;CDK12;CLCF1;CLSPN;DOK7;DUSP10;DUSP2;DUSP3;DVL1;EIF4G3;FBXO2;FEM1B;FNIP2;GNB2L1;HIPK3;HPX;HRAS;KDM3A;KIDINS220;LAMTOR2;LATS1;LATS2;LIME1;LPAR1;MAGI3;MAP3K10;MAP4K2;MAPK1;MAPK11;MLST8;NF1;NIPBL;NOG;NRP1;P2RX7;PDE6G;PIK3CB;PIK3CG;PIN1;PLA2G  
10;CDK12;CDK13;CHD7;CHTF18;CLCN4;CLPP;CSNK1G1;DALRD3;DDX21;DDX28;DDX39A;DDX43;DDX49;DGUOK;DTYMK;DYNC1L1;EIF2B2;ETNK2;FASTK;FICD;FIGNL2;FLAD1;FPGS;FUK;GLYCTK;HELZ;HIPK1;HIPK3;IRAK4;KHK;KIF15;KIF20A;KIF24;KIF7;LATS1;LATS2;LTK;MAGI3;MAP3K10;MAP4K2;MAPK1;MAP  
5M4;MAPK11;NSRP1;PATL1;POLR2F;POLR2G;POLR2I;POLR2L;PRMT7;PSMA7;PSMB4;PSMB5;PSMB7;PSMD9;RBMXL1;RC3H1;RPL13;RPL18;RPL18A;RPL28;RPL29;RPL38;RPL8;RPLP1;RPLP2;RPS15;RPS2;RPS28;RQCD1;RSRC1;SF3B5;SNRNP25;SNRPC;THOC6;TUT1;TXNL4A;UPF2;WDR38;WIBG;YTHDC1;YWHA  
  
i;BUB1;BUB1B;C17orf70;C1orf86;C1QBP;CANX;CAPRIN1;CCDC28B;CCDC61;CDC6;CDCA8;CDK12;CENPF;CENPM;CENPT;CEP55;CHRAC1;CLASP1;CLIP1;CNTLN;CORO6;CTTNBP2NL;DAAM1;DDX21;DDX28;DIAPH2;DLGAP5;DNAL4;DTD1;DVL1;DYNC1L1;E4F1;EDF1;ELMO3;ERCC1;EXOSC5;FBL;FBXW11;FGD6;F  
i;BUB1;BUB1B;C17orf70;C1orf86;C1QBP;CANX;CAPRIN1;CCDC28B;CCDC61;CDC6;CDCA8;CDK12;CENPF;CENPM;CENPT;CEP55;CHRAC1;CLASP1;CLIP1;CNTLN;CORO6;CTTNBP2NL;DAAM1;DDX21;DDX28;DIAPH2;DLGAP5;DNAL4;DTD1;DVL1;DYNC1L1;E4F1;EDF1;ELMO3;ERCC1;EXOSC5;FBL;FBXW11;FGD6;F  
5;CDK10;CDK12;CDK13;CHD7;CHTF18;CLCN4;CLPP;CSNK1G1;DALRD3;DDX21;DDX28;DDX39A;DDX43;DDX49;DGUOK;DTYMK;DYNC1L1;EIF2B2;ETNK2;FASTK;FICD;FIGNL2;FLAD1;FPGS;FUK;GLYCTK;HELZ;HIPK1;HIPK3;IRAK4;KHK;KIF15;KIF20A;KIF24;KIF7;LATS1;LATS2;LTK;MAGI3;MAP3K10;MAP4K2;MAPK  
  
11;ANAPC2;APOE;APOM;ARFGEF1;ARIH1;ARL6IP4;ARNTL;ASB3;ASB6;ASH1L;ASXL2;ATF4;ATF7IP;ATG4D;ATP6AP2;ATRIP;AVP1;B3GALT6;B3GAT3;B4GALT2;B4GALT7;BABAM1;BHLHE41;BRAF;BRF1;BRF2;BUB1B;C11orf30;C17orf70;C19orf10;C1orf86;C1QBP;C8G;CANX;CAPN10;CAPRIN1;CCDC101;CCNL2;  
FBXW11;FBXW5;GNB2L1;HERC3;LSM2;LSM4;MAN1B1;MPG;MUTYH;MYLIP;NTHL1;OGG1;PATL1;PNKP;POLD1;PSMA7;PSMB4;PSMB5;PSMB7;PSMD9;RC3H1;RULM;RNASEH2C;RPL13;RPL18;RPL18A;RPL28;RPL29;RPL38;RPL8;RPLP1;RPLP2;RPS15;RPS2;RPS28;RQCD1;STUB1;TLK2;TRIP12;UBA7;UBXN1;UPF2  
5;WNT7A;ZEB2  
1;CLSPN;DOK7;DUSP10;DUSP2;DUSP3;DVL1;EIF4G3;FNIP2;GNB2L1;HIPK3;HPX;HRAS;KIDINS220;LAMTOR2;LATS1;LATS2;LIME1;LPAR1;MAGI3;MAP3K10;MAP4K2;MAPK1;MAPK11;MLST8;NF1;NOG;NRP1;P2RX7;PDE6G;PIK3CB;PIK3CG;PIN1;PLA2G6;PREB;PRKAR2A;PTPRC;RBPMS;SEN2;SPRED2;SPTBN4;  
5;CDK10;CDK12;CDK13;CHD7;CHTF18;CLCN4;CLPP;CSNK1G1;DALRD3;DDX21;DDX28;DDX39A;DDX43;DDX49;DGUOK;DTYMK;DYNC1L1;EIF2B2;ETNK2;FASTK;FICD;FIGNL2;FLAD1;FPGS;FUK;GLYCTK;HELZ;HIPK1;HIPK3;IRAK4;KHK;KIF15;KIF20A;KIF24;KIF7;LATS1;LATS2;LTK;MAGI3;MAP3K10;MAP4K2;MAPK  
  
G4;PLEKHG5;PSD;RABGEF1;RALGAPB;RASA2;RGL1;RHPN1;SERGEF;SGSM3;SMAP1;SOS1;SPATA13;TBC1D10A;TBC1D10C;TBC1D17;USP6NL;VAV

V1N;PPP2R3B;PPTC7;PTPRC;TIMM50;UBASH3E  
ER;GGA1;IPO8;KRT18;LIME1;MAPK1;MED1;NDUFA13;NF1;NFKBIL1;OGG1;PEX16;PEX6;PICK1;PIP5K1A;RBPMS;RPL13;RPL18;RPL28;RPL29;RPL38;RPL8;RPLP1;RPLP2;RPS15;RPS2;RPS28;SCARB2;SEC24B;SLC25A6;SSR1;SSR4;STAM;STX1A;SYNGR1;SYTL1;TIMM10;TIMM13;TIMM50;TLR7;TPR;TRPS1;V  
R1;MLST8;NF1;PIN1;PIP5K1A;PLEKHG4;PLEKHG5;PSD;RAC3;RALGAPB;RASA2;RGL1;RHOC;RHOT2;SGSM3;SMAP1;SOS1;SPATA13;STMN3;TAGAP;TNK1;USP6NL;VAV:  
SH3RF1;SLC25A5;TIMM50;TNFRSF25;TNFSF12;TP73;TRAF2;TRIB3  
SH3RF1;SLC25A5;TIMM50;TNFRSF25;TNFSF12;TP73;TRAF2;TRIB3  
;FICD;GNAI3;GNB2L1;GNG8;GNGT2;HRAS;MACROD1;MLST8;MRI1;MTG1;NF1;NME3;NME4;NT5C;NUDT1;NUDT18;PANK4;PAPSS1;PEX6;PICK1;PIN1;PIP5K1A;PKX;QTRT1;RAB21;RAB33A;RAC3;RALGAPB;RASA2;SMAP1;SOS1;STMN3;STOML2;SURF1;TNNT3;TPM2;UCK1;UCKL1;USP6NL;VAV

L11;E2F1;E4F1;FANCG;FEM18;GAS2L3;HBP1;HINFP;HRAS;LATS1;LATS2;MAD1L1;MCM7;MLL5;PIDD;PPP2R3B;PSMA7;PSMB4;PSMB5;PSMB7;PSMD9;RAD9A;SGSM3;TAOK3;TBRG4;TNFAIP3;TOP2A;TP73;TPR;ZBTB1

;FBX15;FBXO2;FBXO44;FBXW11;FBXW5;GNB2L1;GYG1;HERC3;LSM2;LSM4;MAN1B1;MPG;MUTYH;MYLIP;NAGLU;NTHL1;OGG1;P2RX7;PATL1;PGM2;PHK8;PHKG1;PNKP;POLD1;PSMA7;PSMB4;PSMB5;PSMB7;PSMD9;RC3H1;RLIM;RNASEH2C;RPL13;RPL18;RPL18A;RPL28;RPL29;RPL38;RPL8;RPLP1;RPLP2;f

ILGAP5;DYNC1L11;E4F1;FSD1;HAUS8;KIF15;KIF20A;LATS1;LATS2;MAD1L1;NCAPH;NIPBL;NUSAP1;PIN1;RAD21;SAC3D1;STRA13;TADA3;TPR;TTN;TXNL4A;USP9X  
2;TAOK3;TNFAIP3;TP73;TRIB3

IN1;CCNL2;CD36;CDC25A;CDC6;CDK12;CLCF1;CLSPN;DOK7;DUSP10;DUSP2;DUSP3;DVL1;EIF1;EIF2B2;EIF2B4;EIF3K;EIF4G3;ETF1;FBXO2;FBXW11;FEM1B;FNIP2;GNB2L1;HIPK3;HPX;HRAS;KDM3A;KIDINS220;LAMTOR2;LARP4B;LATS1;LATS2;LIME1;LPAR1;LSM14A;MAGI3;MAP3K10;MAP4K2;MAPK1;MAPK:  
CLIP1;DLGAP5;DYNC1L11;E4F1;FSD1;HAUS8;KIF15;LATS1;LATS2;MAD1L1;MTFP1;NCAPH;NIPBL;NUSAP1;PIN1;RAD21;SAC3D1;STRA13;TADA3;TPR;TTN;TXNL4A;USP9X  
3;TNFAIP3;TP73;TRIB3  
IP3;TP73;TRIB3  
ILGAP5;DYNC1L11;E4F1;FSD1;HAUS8;KIF15;LATS1;LATS2;MAD1L1;NCAPH;NIPBL;NUSAP1;PIN1;RAD21;SAC3D1;STRA13;TADA3;TPR;TTN;TXNL4A;USP9X  
ILGAP5;DYNC1L11;E4F1;FSD1;HAUS8;KIF15;LATS1;LATS2;MAD1L1;NCAPH;NIPBL;NUSAP1;PIN1;RAD21;SAC3D1;STRA13;TADA3;TPR;TTN;TXNL4A;USP9X

ERLIN2;ERP44;FADS3;FAF2;FAM69B;FKBP2;HSD17B12;JAGN1;JSRP1;KRTCAP2;LMF1;LMF2;MAN1B1;MIA3;MOGS;MPDU1;NECAB3;P4HTM;PANX1;PCYT2;PEMT;PEX16;PIGQ;POMT1;PPM1L;PREB;PTDSS2;PTL8;RAB21;SEC22B;SEC24B;SLC37A4;SOAT1;SOAT2;SPPL2A;SPPL2B;SSR1;SSR4;STS;TLR7;TM7SF2;  
SC5;FGD6;FICD;GNAI3;GNB2L1;GNG8;GNGT2;HRAS;ITPA;LSM2;LSM4;MLST8;MPG;MTG1;MUTYH;NF1;NT5C;NTHL1;NUDT1;NUDT18;OGG1;PATL1;PEX6;PICK1;PIN1;PIP5K1A;PNKP;POLD1;PKX;RAB21;RAB33A;RAC3;RALGAPB;RASA2;RC3H1;RNASEH2C;RPL13;RPL18;RPL18A;RPL28;RPL29;RPL38;RPL8;RPLP1;  
1;SIGIRR;SP1;TCEB2;TNFAIP3;TOP2A;TRAF6;ZC3HVA1  
JCG;FEM1B;GAS2L3;HBP1;HINFP;HRAS;MAD1L1;MCM7;MLL5;PIDD;PPP2R3B;PSMA7;PSMB4;PSMB5;PSMB7;PSMD9;RAD9A;SGSM3;TAOK3;TBRG4;TOP2A;TP73;TP1  
D6;FICD;GNAI3;GNB2L1;GNG8;GNGT2;HRAS;ITPA;MLST8;MTG1;NF1;NME3;NME4;NUDT1;PEX6;PICK1;PIN1;PIP5K1A;RAB21;RAB33A;RAC3;RALGAPB;RASA2;SMAP1;SOS1;STMN3;STOML2;SURF1;UCK1;UCKL1;USP6NL;VAV:  
5;SEC24B;SEMA6A;STK25;TACC1;TMED5  
N10;CCHCR1;CCS;CD36;CHMP4A;CHMP6;CPSF2;CREB3;DDX39A;ERP29;FAM21B;FBXW11;GFER;GGA1;GIMAP5;HOOK3;IPO8;KLHL12;KRT18;LIME1;LMF1;MAPK1;MED1;MTM1;NDUFA13;NF1;NFKBIL1;NSRP1;NUP153;OGG1;P2RX7;PEX16;PEX6;PICK1;PIK3C3;PIP5K1A;PREB;PTPRC;RBPMS;RHOT2;RPL13;RPI  
MDEC1;ADAMTS13;ADAMTS12;ADHFE1;ADNP;ADORA2A;ADPRHL2;AES;AFF1;AFTPH;AHCY;AHCYL1;AHSAA2;AIP;AK1;AK4;ALKBH7;ALS2;AMDHD2;ANAPC11;ANAPC2;ANKMY1;ANKRD17;ANKRD23;ANKRD54;AP1G1;AP1G2;APOE;APOM;APPL2;APRT;ARFGEF1;ARFIP2;ARFRP1;ARHGAP4;ARHGEF25;ARHGEF2  
7;NRP1;P2RX6;P2RX7;PMM1;RAC3;SLC1A3;SPTBN4;STRN;TMPRSS5;TOP1;TXN2;TXNRD1;UBXN1;VPS1f

P2K;BRAF;BUB1;BUB1B;CDC6;CDK10;CDK12;CDK13;CHD7;CHTF18;CLCN4;CLPP;CSNK1G1;DALRD3;DDX21;DDX28;DDX43;DDX39A;DDX43;DDX49;DGUOK;DRG2;DTYMK;DYNC1L11;EEF1A2;EIF2B2;ETNK2;FASTK;FICD;FIGNL2;FLAD1;FPGS;FUK;GIMAP5;GLYCTK;GNAI3;GTPBP3;GTPBP6;HELZ;HIPK1;HIPK3;HRAS;IFT27  
FICD;GNAI3;GNB2L1;GNG8;GNGT2;HRAS;ITPA;LSM2;LSM4;MLST8;MPG;MTG1;MUTYH;NF1;NT5C;NTHL1;NUDT1;NUDT18;OGG1;PATL1;PEX6;PICK1;PIN1;PIP5K1A;PNKP;POLD1;PKX;RAB21;RAB33A;RAC3;RALGAPB;RASA2;RC3H1;RNASEH2C;RPL13;RPL18;RPL18A;RPL28;RPL29;RPL38;RPL8;RPLP1;RPLP2;RP  
D;FBXW11;GNB2L1;HIPK3;HPX;HRAS;KIDINS220;LAMTOR2;LEMED2;LGALS1;LIME1;LPAR1;MAGI3;MAP3K10;MAP4K2;MAPK1;MAPK11;MC1R;NENF;NF1;P2RX7;PDE6G;PHLDA3;PIK3CB;PIK3CG;PIN1;PLA2G6;PLEKHG5;RHOC;S100A13;SERPINF2;SH3RF1;SLC35B2;SPRED2;TAOK3;TLR7;TMEM101;TNFAIP3;TNI  
;H2AF1;H2AFY2;INOB0E;MAD1L1;MBD3;MBD5;MCM7;MCRS1;MKI67;MSH3;NCAPH;NCAPH2;NEIL1;NSMCE1;NUSAP1;OBF1;PDX4;POLD1;RAD21;RAD9A;REC8;RFX3;RNF169;SETD2;SETD7;STRA13;SUDS3;SUVA420H1;SWI5;SYCE1L;TELO2;THAP7;TOP1;TOP2A;TOP3B;TOPBP1;TP73;TPR;TRIM24;TTN;WHSC1  
A2;COL6A1;COL6A2;COL9A2;CREB3;CREB3L4;CRELD2;CTSC;CYP11B1;CYP2E1;DERL3;DOLK;DPM3;DSE;DU2L2;ERGC3;ERLIN2;ERP29;ERP44;FADS3;FAF2;FAM69B;FBXO2;FCRLB;FKBP2;GHDC;HSD17B12;JAGN1;JSRP1;KRTCAP2;LEPRE1;LEPREL2;LMF1;LMF2;MAL;MAN1B1;MIA3;MOGS;MPDU1;MR1;NCEH1;NI  
ATP5G2;ATP5G3;ATP5H;CDS2;DCXR;DGUOK;DOLK;DPM3;DTYMK;ETNK2;FDXR;FGD6;FICD;FLAD1;GNAI3;GNB2L1;GNG8;GNGT2;GPX4;HRAS;ISYNA1;ITPA;MC1R;MLST8;MPG;MTG1;MTM1;MTMR1;MUTYH;MVK;NF1;NME3;NME4;NT5C;NTHL1;NUDT1;NUDT18;OGG1;PANK4;PAPSS1;PCYT2;PEMT;PEX6;PF

PHPT1;PNKP;PPAP2C;PPM1D;PPM1L;PPM1N;PPP2R3B;PPTC7;PTPRC;TIMM50;UBASH3E  
FICD;GNAI3;GNB2L1;GNG8;GNGT2;HRAS;ITPA;LSM2;LSM4;MLST8;MPG;MTG1;MUTYH;NF1;NT5C;NTHL1;NUDT1;NUDT18;OGG1;PATL1;PEX6;PICK1;PIN1;PIP5K1A;PNKP;POLD1;PKX;RAB21;RAB33A;RAC3;RALGAPB;RASA2;RC3H1;RNASEH2C;RPL13;RPL18;RPL18A;RPL28;RPL29;RPL38;RPL8;RPLP1;RPLP2;RP

;4;TRAF6;WNT7A;ZEB2



3;TP73

^VD1;GGA1;GOLPH3;IRAK4;IRF3;LAMTOR2;MAL;MAPK1;MTM1;NIPA2;PIK3C3;PLEKHF1;RAB21;RABEP2;RABEPK;RABGEF1;RPS6K1;RUSC1;SNF8;SNX20;SPPL2A;SPPL2B;STAM;STAMPB;STS;TLR7;TMEM9;TRAF6;USP8;VPS16;VPS41;WASH3P;ZFVYE27;ZP  
UV420H1;TPR  
P2K;BRAF;BUB1;BUB1B;CDC6;CDK10;CDK12;CDK13;CHD7;CHTF18;CLCN4;CLPP;CSNK1G1;DALRD3;DDX21;DDX28;DDX39A;DDX43;DDX49;DGUOK;DRG2;DTYMK;DYNC1L1;EEF1A2;EIF2B2;ETNK2;FASTK;FICD;FIGNL2;FLAD1;FPGS;FUK;GIMAP5;GLYCTK;GNAI3;GTPBP3;GTPBP6;HELZ;HIPK1;HIPK3;HRAS;IFT27  
>3B;ATL3;ATP5D;BCS1L;BMP2K;BRAF;BUB1;BUB1B;CDC6;CDK10;CDK12;CDK13;CEL;CHD7;CHTF18;CLCN4;CLPP;CRYL1;CSNK1G1;CTSC;DALRD3;DDX21;DDX28;DDX39A;DDX43;DDX49;DGUOK;DRG2;DTYMK;DUS1L;DUS2L;DUS3L;DYNC1L1;EEF1A2;EIF2B2;ETNK2;FASTK;FBLN7;FDXR;FICD;FIGNL2;FLAD1;FPG

P2K;BRAF;BUB1;BUB1B;CDC6;CDK10;CDK12;CDK13;CHD7;CHTF18;CLCN4;CLPP;CSNK1G1;DALRD3;DDX21;DDX28;DDX39A;DDX43;DDX49;DGUOK;DRG2;DTYMK;DYNC1L1;EEF1A2;EIF2B2;ETNK2;FASTK;FICD;FIGNL2;FLAD1;FPGS;FUK;GIMAP5;GLYCTK;GNAI3;GTPBP3;GTPBP6;HELZ;HIPK1;HIPK3;HRAS;IFT27  
\_C22A17;SLC37A4;SLC39A13;SPPL2A;SPPL2B;ST3GAL3;ST6GALNAC1  
P2K;BRAF;BUB1;BUB1B;CDC6;CDK10;CDK12;CDK13;CHD7;CHTF18;CLCN4;CLPP;CSNK1G1;DALRD3;DDX21;DDX28;DDX39A;DDX43;DDX49;DGUOK;DRG2;DTYMK;DYNC1L1;EEF1A2;EIF2B2;ETNK2;FASTK;FICD;FIGNL2;FLAD1;FPGS;FUK;GIMAP5;GLYCTK;GNAI3;GTPBP3;GTPBP6;HELZ;HIPK1;HIPK3;HRAS;IFT27  
P2K;BRAF;BUB1;BUB1B;CDC6;CDK10;CDK12;CDK13;CHD7;CHTF18;CLCN4;CLPP;CSNK1G1;DALRD3;DDX21;DDX28;DDX39A;DDX43;DDX49;DGUOK;DRG2;DTYMK;DYNC1L1;EEF1A2;EIF2B2;ETNK2;FASTK;FICD;FIGNL2;FLAD1;FPGS;FUK;GIMAP5;GLYCTK;GNAI3;GTPBP3;GTPBP6;HELZ;HIPK1;HIPK3;HRAS;IFT27  
P2K;BRAF;BUB1;BUB1B;CDC6;CDK10;CDK12;CDK13;CHD7;CHTF18;CLCN4;CLPP;CSNK1G1;DALRD3;DDX21;DDX28;DDX39A;DDX43;DDX49;DGUOK;DRG2;DTYMK;DYNC1L1;EEF1A2;EIF2B2;ETNK2;FASTK;FICD;FIGNL2;FLAD1;FPGS;FUK;GIMAP5;GLYCTK;GNAI3;GTPBP3;GTPBP6;HELZ;HIPK1;HIPK3;HRAS;IFT27

RAF;BUB1;BUB1B;CDC6;CDK10;CDK12;CDK13;CHD7;CHTF18;CLCN4;CLPP;CSNK1G1;DALRD3;DDX21;DDX28;DDX39A;DDX43;DDX49;DGUOK;DRG2;DTYMK;DYNC1L1;EEF1A2;EIF2B2;ETNK2;FASTK;FICD;FIGNL2;FLAD1;FPGS;FUK;GIMAP5;GLYCTK;GNAI3;GTPBP3;GTPBP6;HELZ;HIPK1;HIPK3;HRAS;IFT27;IRAK4

44;SLC39A13;SPPL2A;SPPL2B;ST3GAL3;ST6GALNAC1  
TUT1

PVD1;IQGAP2;ITSN2;LAMTOR2;MAP4K2;NF1;PCP2;PLEKHG4;PLEKHG5;PSD;RABEP2;RABGEF1;RALGAPB;RASA2;RGL1;RHPN1;RINL;SERGEF;SGSM3;SH2D3A;SMAP1;SOS1;SPATA13;TAGAP;TBC1D10A;TBC1D10C;TBC1D17;USP6NL;VAV

FRP1;ARL16;ARNTL;ASH1L;ASXL2;ATAD3B;ATF4;ATL3;ATP5D;BCS1L;BHLHE41;BMP2K;BRAF;BUB1;BUB1B;C17orf49;C17orf70;C1QBQ;CAPRIN1;CBR1;CD320;CD38;CDC6;CDK10;CDK12;CDK13;CEL2;CEL2F;CENPT;CHD7;CHRA1;CHTF18;CLCN4;CLIP1;CLPP;CLSPN;CPSF2;CPSF4;CREB3;CREB3L4;CRIP1;CRYL1  
NKRD23;ANKRD54;APPL2;APRT;ARFGEF1;ARHGAP4;ARL6IP4;ARNTL;ASH1L;ASXL2;ATF4;ATF7IP;ATRIP;AUP1;BABAM1;BHLHE41;BMP2K;BOK;BRAF;BRAT1;BRF1;BRF2;BUB1;BUB1B;C11orf30;C12orf10;C17orf49;C17orf70;C1orf86;C1QBQ;CAPS;CCDC101;CCDC106;CCDC51;CCHCR1;CCNL2;CCS;CD38;CDC25  
>GAP2;ITSN2;LAMTOR2;MAP4K2;NF1;PCP2;PLEKHG4;PLEKHG5;PSD;RABEP2;RALGAPB;RASA2;RGL1;RHPN1;RINL;SERGEF;SGSM3;SH2D3A;SMAP1;SOS1;SPATA13;TAGAP;TBC1D10A;TBC1D10C;TBC1D17;USP6NL;VAV  
P2K;BRAF;BUB1;BUB1B;CDC6;CDK10;CDK12;CDK13;CHD7;CHTF18;CLCN4;CLPP;CSNK1G1;DALRD3;DDX21;DDX28;DDX39A;DDX43;DDX49;DGUOK;DRG2;DTYMK;DYNC1L1;EEF1A2;EIF2B2;ETNK2;FASTK;FICD;FIGNL2;FLAD1;FPGS;FUK;GIMAP5;GLYCTK;GNAI3;GTPBP3;GTPBP6;HELZ;HIPK1;HIPK3;HRAS;IFT27

FA;CYP2E1;DAAM1;DIAPH2;DOK7;DUSP2;DVL1;DYM;EHADH;FAF2;FBXW5;FGD6;GCHFR;GNB2L1;GRASP;GRIN3A;HDAC10;HINFP;IPO8;KAT2A;KCNN4;KIF20A;LAMB1;LAT;LATS1;LIME1;ISM2;MAP4K2;MAPK1;MC1R;MLL5;MSH3;NDUF57;NIPBL;NOXA1;NOXO1;PANX1;PFKFB2;PHKG1;PICK1;PIN1;PIPSK1A;I  
;ADD3;ADI1;ADRM1;AEBP1;AEBP2;AFF4;AGAP2;AGAP3;AGL;AGPAT5;AHR;AIM2;AIMP1;AIMP2;AKAP11;AKAP7;AKAP8L;AKIP1;AKIRIN1;AKR1B1;AKT1;AKTIP;ALG2;ALKBH4;ALKBH5;ALKBH8;ALS2CR8;ANAPC10;ANG;ANKLE1;ANKRD12;ANKRD28;ANKRD32;ANKRD34B;ANKRD49;ANLN;ANP32E;ANXA1;APIAF  
BLIM2;ACAD10;ACAD9;ACADM;ACADS;ACADVL;ACAT1;ACAT2;ACBD3;ACBD5;ACBD6;ACD;ACOT13;ACOT7;ACP2;ACSF2;ACSF3;ACSL4;ACSL6;ACSS1;ACTL6A;ACTN4;ADA;ADAM10;ADAM15;ADAMTSS;ADAP1;ADC;ADCK1;ADCK2;ADCK3;ADD3;ADI1;ADORA1;ADRM1;AEBP1;AEBP2;AFF4;AGAP2;AGAP3;AGI  
BLIM2;ACAD10;ACAD9;ACADM;ACADS;ACADVL;ACAT1;ACAT2;ACBD3;ACBD5;ACBD6;ACD;ACOT13;ACOT7;ACP2;ACSF2;ACSF3;ACSL4;ACSL6;ACSS1;ACTL6A;ACTN4;ADA;ADAM10;ADAM15;ADAMTSS;ADAP1;ADC;ADCK1;ADCK2;ADCK3;ADD3;ADI1;ADORA1;ADRM1;AEBP1;AEBP2;AFF4;AGAP2;AGAP3;AGI  
BI2;ABLIM2;ACAD10;ACAD9;ACADM;ACADS;ACADVL;ACAT1;ACAT2;ACBD3;ACBD5;ACBD6;ACD;ACOT13;ACOT7;ACP2;ACSF2;ACSF3;ACSL4;ACSL6;ACSS1;ACTL6A;ACTL9;ACTN4;ACTR1A;ACTR6;ADA;ADAM10;ADAM15;ADAMTSS;ADAP1;ADC;ADCK1;ADCK2;ADCK3;ADD3;ADI1;ADORA1;ADRM1;AEBP1;AEB  
BCE1;ABHD10;ABHD14B;ABI1;ABI2;ABI3;ABLIM2;ABR;ACAD10;ACAD9;ACADM;ACADS;ACADVL;ACAT1;ACAT2;ACBD3;ACBD5;ACBD6;ACD;ACOT13;ACOT7;ACP2;ACSF2;ACSF3;ACSL4;ACSL6;ACSS1;ACTL6A;ACTL9;ACTN4;ACTR1A;ACTR6;ACVR2A;ACY3;ADA;ADAM10;ADAM15;ADAMTSS;ADAP1;ADC;ADCK  
BCE1;ABHD10;ABHD14B;ABI1;ABI2;ABI3;ABLIM2;ABR;ACAD10;ACAD9;ACADM;ACADS;ACADVL;ACAT1;ACAT2;ACBD3;ACBD5;ACBD6;ACD;ACOT13;ACOT7;ACP2;ACSF2;ACSF3;ACSL4;ACSL6;ACSS1;ACTL6A;ACTL9;ACTN4;ACTR1A;ACTR6;ACVR2A;ACY3;ADA;ADAM10;ADAM15;ADAMTSS;ADAP1;ADC;ADCK  
BCD3;ABCE1;ABHD10;ABHD14B;ABI1;ABI2;ABI3;ABLIM2;ABR;ACAD10;ACAD9;ACADM;ACADS;ACADVL;ACAT1;ACAT2;ACBD3;ACBD5;ACBD6;ACD;ACOT13;ACOT7;ACP2;ACSF2;ACSF3;ACSL4;ACSL6;ACSS1;ACTL6A;ACTL9;ACTN4;ACTR1A;ACTR6;ACVR2A;ACY3;ADA;ADAM10;ADAM15;ADAMTSS;ADAP1;ADC;ADCK  
BCD3;ABCE1;ABHD10;ABHD14B;ABI1;ABI2;ABI3;ABLIM2;ABR;ACAD10;ACAD9;ACADM;ACADS;ACADVL;ACAT1;ACAT2;ACBD3;ACBD5;ACBD6;ACD;ACOT13;ACOT7;ACP2;ACSF2;ACSF3;ACSL4;ACSL6;ACSS1;ACTL6A;ACTL9;ACTN4;ACTR1A;ACTR6;ACVR1C;ACVR2A;ACVRL1;ACY3;ADA;ADAM10;ADAM15;ADA  
0;ABI1;ABI2;ABR;ACAD10;ACAD9;ACADM;ACADS;ACADVL;ACAT1;ACAT2;ACBD3;ACBD5;ACOT13;ACOT7;ACP2;ACSF2;ACSF3;ACSL4;ACSL6;ACSS1;ACTL6A;ACTL9;ACTN4;ACTR1A;ADA;ADAM10;ADAM15;ADC;ADCK1;ADCK2;ADCK3;ADD3;ADI1;ADORA1;ADRBK1;ADSSL1;AFF4;AGAP2;AGBL3;AGGF1;AGL;AGPAT5;AGPS;AF  
T1;ACAT2;ACBD3;ACBD5;ACD;ACP2;ACSL4;ACSL6;ACSS1;ACTL6A;ACTN4;ACTR1A;ADA;ADAM10;ADAM15;ADAM22;ADAMTSS;ADAMT56;ADAP1;ADC;ADI1;ADM2;ADORA1;ADRBK1;ADRM1;ADSSL1;AEBP1;AEBP2;AFF4;AGAP2;AGAP3;AGBL3;AGER;AGFG2;AGGF1;AGL;AGPAT5;AGPS;AF  
DORA1;ADRBK1;ADRM1;AEBP1;AEBP2;AFF4;AGAP3;AGER;AGGF1;AGL;AHR;AIDA;AIM2;AIMP1;AIMP2;AKAP7;AKT1;AKTIP;ALG1;ALG10;ALG10B;ALG11;ALG13;ALG2;ALG3;ALG6;ALKBH5;ALKBH8;ANAPC10;ANG;ANGPT1;ANKRD13C;ANKRD49;ANXA1;APC;APEX1;APEX2;APH1A;APLF;APOBEC3D;APT;ARAF;  
T1;ACAT2;ACBD3;ACBD5;ACD;ACP2;ACSL4;ACSL6;ACSS1;ACTL6A;ACTN4;ACTR1A;ADA;ADAM10;ADAM15;ADAM22;ADAMTSS;ADAMT56;ADAP1;ADC;ADI1;ADM2;ADORA1;ADRBK1;ADRM1;ADSSL1;AEBP1;AEBP2;AFF4;AGAP2;AGAP3;AGER;AGFG2;AGGF1;AGL;AGPAT5;AGPS;AHR;AIDA;AIFM3;AIM2;AIMP1;AIMP2;AF  
IP3;AIDA;AIMP1;AIMP2;AKT1;AKTIP;ALG1;ALG10;ALG10B;ALG11;ALG13;ALG2;ALG3;ALG6;ANAPC10;ANG;ANGPT1;ANXA1;APC;APH1A;ARAF;ARFGAP1;ARID5A;ARRB1;ARSA;ARSK;ASB13;ASB7;ASPH;ATG5;ATP7A;ATPBD4;ATXN7L3;AURKC;B2M;B3GALNT1;B3GALT2;B3GALT1;B3GNT1;B3GNT5;B4  
;ADVL;ACAP1;ACAP2;ACAT1;ACAT2;ACBD3;ACD;ACOT7;ACSF2;ACSF3;ACSL4;ACSL6;ACSS1;ACTL6A;ACVR1C;ACVR2A;ACVRL1;ADA;ADAM10;ADAM15;ADAM22;ADAMTSS;ADAMT56;ADAP1;ADC;ADI1;ADM2;ADORA1;ADRBK1;ADRM1;ADSSL1;AEBP1;AEBP2;AFF4;AGAP2;AGAP3;AGBL3;AGER;AGFG2;AGGF1  
10;ADAM15;ADAM22;ADAMTSS;ADAMT56;ADC;ADI1;ADM2;ADORA1;ADRBK1;ADRM1;AEBP1;AEBP2;AFF4;AGAP2;AGAP3;AGBL3;AGER;AGFG2;AGGF1;AGL;AHR;AIDA;AIM2;AIMP1;AIMP2;AKAP7;AKT1;AKTIP;ALG1;ALG10;ALG10B;ALG11;ALG13;ALG2;ALG3;ALG6;ALKBH5;ALKBH8;AMD1;ANAPC10;ANG;ANGPT1;  
IDSB;ACADVL;ACAP1;ACAP2;ACAT1;ACAT2;ACBD3;ACD;ACOT7;ACSF2;ACSF3;ACSL4;ACSL6;ACSS1;ACTL6A;ACVR1C;ACVR2A;ACVRL1;ADA;ADAM10;ADAM15;ADAM22;ADAMTSS;ADAMT56;ADAP1;ADC;ADI1;ADM2;ADORA1;ADRBK1;ADRM1;ADSSL1;AEBP1;AEBP2;AFF4;AGAP2;AGAP3;AGBL3;AGER;AGFG2  
;ABCE1;ABC3;ABI1;ABI2;ABI3;ABLIM2;ABR;ACAD10;ACAD9;ACADM;ACADS;ACADVL;ACAP1;ACAP2;ACAT1;ACBD3;ACBD5;ACBD6;ACD;ACOT7;ACSF2;ACSF3;ACSL4;ACSL6;ACSS1;ACTL6A;ACTN4;ACTR1A;ACVR1C;ACVR2A;ACVRL1;ACY3;ADA;ADAM10;ADAM15;ADAM22;ADAMTSS;ADAMT56;ADAP1;ADC  
1;AKTIP;ALKBH5;ALS2CR8;ANAPC10;ANG;ANKLE1;ANKRD28;APIAR;APEH;APEX1;APIS;APPL1;APT;ARFGAP1;ARFGAP2;ARID4A;ARID5A;ARL4A;ASNA1;ATF1;ATF2;ATP11B;ATPAF2;ATRX;ATXN7L3;BANF1;BAP1;BAZ1A;BCAS2;BCLAF1;BDP1;BMI1;BNIP1;BNIP2;BNIP3L;BRCA2;BRCC3;BRIP1;BRWD1;BTD;BUD;  
IDSB;ACADVL;ACAP1;ACAP2;ACAT1;ACAT2;ACBD3;ACD;ACOT7;ACSF2;ACSF3;ACSL4;ACSL6;ACSS1;ACTL6A;ACVR1C;ACVR2A;ACVRL1;ADA;ADAM10;ADAM15;ADAM22;ADAMTSS;ADAMT56;ADAP1;ADC;ADI1;ADM2;ADORA1;ADRBK1;ADRM1;ADSSL1;AEBP1;AEBP2;AFF4;AGAP2;AGAP3;AGBL3;AGER;AGFG2





SF2;ACSF3;ACSL4;ACSL6;ACSS1;ACTL6A;ACTR1A;ACVR1C;ACVR2A;ACVRL1;ADCK1;ADCK2;ADCK3;ADRBK1;AK3;AKAP7;AKD1;AKT1;ANKK1;ARAF;ASNA1;ATAD1;ATAD2;ATAD2B;ATAD3A;ATP10D;ATP11B;ATP11C;ATP13A2;ATP13A3;ATP2B1;ATP2C1;ATP6A1;ATP7A;ATP8A1;ATP8A2;ATP8B4;ATP8D4;ATRX;CDKN1B;CEP120;CEP135;CEP152;CEP250;CEP57;CEP57L1;CETN3;CHORDC1;CKAP2;CLIP3;CNP;CNTROB;CRIPT;DCTN2;DICE1R1;ECT2;FBXO5;FER;FGFR1OP;FOPNL;GAPDH;GAS2L2;GCC2;HAU1;HAU53;HAU56;HAU57;HDAC3;HDAC6;HOOK1;HOOK2;KATNB1;KIAA1011;KIF11;KIF18A;KIF23;KIF2A;LMNA;KAP5;AKT1;ALDH4A1;ALDOA;AMD1;ANG;ANKRD49;APEX1;ARGLU1;ARHGAP22;ARHGFE2;ARID2;ARID4;ARID4B;ARID4C;ARID5A;ARID5B;ARRB1;ASF1A;ASPH;ATAD2;ATF1;ATF2;ATP2B1;ATP2C1;ATP5C1;ATP5E;ATP5F1;ATP5I;ATP5L;ATP5O;ATP7A;ATRX;ATXN7L3;BACH1;BAZ1A;BAZ2B;BBX;BCLAF1;BDP1;BIRC2;B CYBAS3;DTNBP1;EEA1;EP515;FGD2;HGS;HLA-A;HLA-DMA;HLA-DPB1;HLA-DRA;HPS6;JAK2;LAMTOR3;LDLR;LEPROT;LLGL1;MAP3K7;MARCH1;MCOLN1;MITD1;MTMR2;NDPIP1;NDPIP2;PIKFYVE;RAB10;RAB11;RAB12;RAB14;RAB22A;RAB27B;RAB5A;RAP2A;RAP2C;RET;RNF13;SCAMP1;SCYL2;SH3G1;SLC29F 1;UBE2K;UBE2Q2;UBE2T;UBE3A;ZNF1

P1;SENPE6;UCHL5;USP1;USP12;USP15;USP16;USP19;USP21;USP25;USP37;USP44;USP46;USP5;USP6;USPL1;YOD1;ZNRANB1  
5;C1GALT1;DDOST;DHP5;DOHH;DOLPP1;DPM1;EDEM3;EIF5A2;ESCO1;ESCO2;GALNT1;GALNT3;GALNT4;GALNT7;GAS6;GCN21;GCN24;GFPT1;GMPPA;LMAN1;MAN1A1;MAN1A2;MAN2A1;MANEA;MGAT1;MGAT2;MGAT4A;MPI;MUC1;MUC20;MUC5B;MUC6;PGAP1;PGM3;PIGA;PIGB;PIGF;PIGK;PIGM;PIGS  
CTSS;CYBAS3;DTNBP1;EEA1;EP515;FGD2;HGS;HLA-A;HLA-DMA;HLA-DPB1;HLA-DRA;HPS6;JAK2;LAMTOR3;LDLR;LEPROT;LLGL1;MAP3K7;MARCH1;MCOLN1;MITD1;MTMR2;NDPIP1;NDPIP2;PIKFYVE;RAB10;RAB11;RAB12;RAB14;RAB22A;RAB27B;RAB5A;RAP2A;RAP2C;RET;RNF13;SCAMP1;SCYL2;SH3G1;SLC29F 1;VPS31;SIRT2;TAB2;UBE2N;UBRS;UGL3;USP16;ZNF26;ZNFANB6;ZNRANB1;ZNRANB8

SF2;ACSF3;ACSL4;ACSL6;ACSS1;ACTL6A;ACTR1A;ACVR1C;ACVR2A;ACVRL1;ADCK1;ADCK2;ADCK3;ADRBK1;AK3;AKAP7;AKD1;AKT1;ANKK1;ARAF;ASNA1;ATAD1;ATAD2;ATAD2B;ATAD3A;ATP10D;ATP11B;ATP11C;ATP13A2;ATP13A3;ATP2B1;ATP2C1;ATP6A1;ATP7A;ATP8A1;ATP8A2;ATP8B4;ATP8D4;ATRX;5CC2;GOLGA4;GOPC;INSIG1;LLGL1;LMAN1;MON2;NAPG;OSBP5;PRKCI;RAB10;RAB14;RAB2A;RAB33B;RAB3IP;RAB6A;RAB9B;RER1;RNF139;SAR1A;SAR1B;SCAMP1;SCAMP3;SCFD1;SCYL1;SEC13;SEC23A;SEC24A;SLC30A6;SNX8;SPAST;STEAP2;STX16;STX4;STX5;STX7;TMED10;TMED2;TMX1;TRAPP1;TRAPP 1R;AIM2;AKAP5;AKT1;ANKRD49;APEX1;ARAP2;ARFGAP1;ARFGAP2;ARGLU1;ARHGAP22;ARHGAP5;ARHGFE2;ARID2;ARID4;ARID4B;ARID5A;ARID5B;ARL2;ARRB1;ASAP3;ASF1A;ASPH;ATAD2;ATF1;ATF2;ATP2B1;ATP2C1;ATP5C1;ATP5E;ATP5F1;ATP5I;ATP5L;ATP5O;ATP7A;ATRX;ATXN7L3;BACH1;BAZ1A;BAZ2B;BBX;BCLAF1;BDP1;BIN1;BIRC2;BLOC152;BLZF1;BMI1;BMPR1A;BMPR2; KAP5;AKT1;ALDOA;AMD1;ANG;ANKRD49;APEX1;ARGLU1;ARHGAP22;ARHGFE2;ARID2;ARID4;ARID4B;ARID5A;ARID5B;ARRB1;ASF1A;ASPH;ATAD2;ATF1;ATF2;ATP2B1;ATP2C1;ATP5C1;ATP5E;ATP5F1;ATP5I;ATP5L;ATP5O;ATP7A;ATRX;ATXN7L3;BACH1;BAZ1A;BAZ2B;BBX;BCLAF1;BDP1;BIRC2;BLOC152;BI YRK2;ERCC8;FBXL3;FBXL4;FBXL5;FBXO11;FBXO31;FBXO4;FBXO8;FBXW4;FBXW7;KEAP1;KHL20;KHL22;KHL7;KHL9;NEDD4;RBCK1;RBX1;RCHY1;RING1;RNF11;RNF144B;RNF2;RNF31;RNF40;RNF7;SKP2;SMURF2;TRAF7;UBE2A;UBE2E1;UBE2N;UBE4A;UBOX5;UBR1;WWP

EMIN2;GEMIN6;GNL1;GNL3;GTPBP10;KRR1;LSM6;MBNL1;MINA;MPHOSPH6;NOC4L;NOL6;NOP2;NOP56;NOP58;NSA2;NUDT16;PAN3;PES1;PHAX;PIN4;PRPF31;PRPF6;PSIP1;PTBP2;PTEN;PUM2;RBM5;RPF1;RPL11;RPL26;RPL7;RPS24;RPS7;RRP1;RRP36;RRP8;RRS1;RSL24D1;SART1;SCAF11;SF3A1;SF3A2;SF; CNY;CCP110;CDC25C;CDC7;CDC73;CDK1;CDK2;CDK7;CDKN1B;CDKN1C;CDKN2C;CDKN3;CDT1;CEP135;CEP152;CEP250;CEP290;CEP57;CEP70;CHMP1A;CKS1B;CLRF3;CUL2;CUL4B;CUL5;DFB4;DCTN2;DDX11;DDX3X;DGK2;DLG1;DNA2;E2F4;E2F6;E2F7;EIF4;FBXO31;FBXO5;FGFR1OP;GMNN;GPR132;KPN2A1; 5;AKAP7;AKT1;AKTIP;ALKBH5;ANG;ANGPT1;ANKRD13C;ANXA1;AP1AR;AP1B1;AP1S2;AP2A2;AP3M1;AP3S2;APC;APOO;APPBP2;APPL1;ARF4;ARFGAP1;ARFGAP2;ARFGE2;ARFIP1;ARHGDI4A;ARHGFE2;ARL2;ARL6IP1;ARRB1;ARV1;ASPH;ATG16L2;ATG4A;ATG4B;ATG4C;ATG9A;ATP10D;ATP11B;ATP11C;ATP6 A P1;ADM2;ADORA1;ADRBK1;ADSSL1;AGAP2;AGAP3;AGFG2;AGPAT5;AIDA;AK3;AKAP5;AKT1;AKTIP;ALDOA;ANG;ANGPT1;APC;ARF4;ARAP2;ARF4;ARFGAP1;ARFGAP2;ARHGAP5;ARL2;ARL8B;ARRB1;ARSA;ARSK;ASAP3;ATL2;ATP2B1;ATP2C1;ATP5C1;ATP5E;ATP5F1;ATP5I;ATP5L;ATP5O;ATP7A;AUROK;BAG4; DOA;AMOR1;ANG;ANKRD49;APEX1;ARGLU1;ARHGAP22;ARHGFE2;ARID2;ARID4;ARID4B;ARID5A;ARID5B;ARRB1;ASF1A;ASPH;ATAD2;ATF1;ATF2;ATP2B1;ATP2C1;ATP5C1;ATP5E;ATP5F1;ATP5I;ATP5L;ATP5O;ATP7A;ATRX;ATXN7L3;BACH1;BAZ1A;BAZ2B;BBX;BCLAF1;BDP1;BIRC2;BLOC152;BLZF1;BMI1;BMF

;PPWD1;PRP11B;PRPF31;PRPF38B;PRPF4B;PRPF6;PTBP2;RALY;RBM5;RHEB;RNPC3;SART1;SF3A1;SF3A2;SF3B1;SF3B1A;SKIV2L2;SLU7;SMNDC1;SNRNP35;SNRNP48;SNRNP8;SNRNP2;SNRNP1;SNRPE;SNRPG;SREK1;SUGP1;TXNL4B;U2AF1;UPF1;WBPA;XAB2;ZCCHC8;ZCRB1;ZNF32 CNY;CCP110;CDC25C;CDC7;CDC73;CDK1;CDK2;CDK7;CDKN1B;CDKN1C;CDKN2C;CDKN3;CDT1;CEP135;CEP152;CEP250;CEP290;CEP57;CEP70;CHMP1A;CKS1B;CLRF3;CUL2;CUL4B;CUL5;DFB4;DCTN2;DDX11;DDX3X;DGK2;DLG1;DNA2;E2F4;E2F6;E2F7;EIF4;FBXO31;FBXO5;FGFR1OP;GMNN;GPR132;KPN2A1; 26;CDC27;CDC7;CDC73;CDK1;CDK2;CDK7;CDK9;CDKN1B;CDKN1C;CDKN2C;CDKN3;CDT1;CGRRF1;CHFR;CHMP1A;CLRF3;CUL2;CUL5;DFB4;DGK2;DLG1;DNA2;ERCC2;ERN1;FAM175A;FBXO31;FBXO5;GAS2;GAS2L2;GAS6;GMNN;HDAC3;HORMAD41;HPGD;HSF1;ILL2LA;IL8;ILK;JMY;KAT2B;KIF20B;MAO2L1;MAPK NDFIP1;NDPIP2;PELI1;PSMA1;PSMA2;PSMA3;PSMA4;PSMA6;PSMA8;PSMB1;PSMB3;PSMC1;PSMC2;PSMC3;PSMC5;PSMC6;PSMD10;PSMD13;PSMD14;PSMD4;PSMD8;PSME1;PTEN;RASSF1;RCHY1;RIPK2;SUMO3;TICAM1;TOPORS;UBC;UBE2D1;UBE2E1;UBE2N;WFS 33;LYST;MAP2K2;MON2;MTBR1;PKA;YVE;RAB10;RAB12;RAB14;RAB9B;RHOBTB3;SCLY2;SLC18A2;SLC30A6;SNX16;SNX17;SNX4;SNX8;SPAG9;STAM2;STX16;STX5;TOM1;UBC;VAMP7;VPS13A;VPS26A;VPS28;VPS36;VPS37A;VPS37B;VPS4A;VPS4B;VPS54;VTA1;YKT6;ZYFYE1

4;CD63;CDK2;CDKN1B;CHMP1A;CHMP1B;CHMP2A;CHMP2B;CLIP3;CLN3;CRK;CST3;CTNS;CTS5;CYBAS3;DELR1;DTNBP1;EEA1;EP515;EXPH5;FAM109B;FGD2;FGR4;FRS2;GIF;GPC1;HGS;HLA-A;HLA-DMA;HLA-DPB1;HLA-DRA;HPS6;IL15;JAK2;KCNQ1;KIAA1033;KIFC1;LAMTOR3;LDLR;LEPROT;LLGL1;LRP6;MA

B1;PSMB3;PSMC1;PSMC2;PSMC3;PSMC5;PSMC6;PSMD10;PSMD13;PSMD14;PSMD4;PSMD8;PSME1;RB1;RFWD2;RPS27L;TP63;TRIAPI1;UB  
USP37;USP44;USP46;USP6;USPL1;VCP11;YOD1;ZNRANB1

CDK2;CDKN1B;CDT1;CHFR;DFB4;DGK2;DLG1;DNA2;ERCC2;FAM175A;FBXO31;HORMAD1;HSF1;MAD2L1;MAPKAPK2;MCM5;MDM2;MSH2;MUC1;NBN;ORC2;ORC3;ORC4;PRCC;PSMA1;PSMA2;PSMA3;PSMA4;PSMA6;PSMA8;PSMB1;PSMB3;PSMC1;PSMC2;PSMC3;PSMC5;PSMC6;PSMD10;PSMD13;PSMD14

PSMB1;PSMB3;PSMC1;PSMC2;PSMC3;PSMC5;PSMC6;PSMD10;PSMD13;PSMD14;PSMD4;PSMD8;PSME1;PTEN;TOPORS;UBC;UBE2D1;UBE2E1;UBE2N;XRCC  
;PSMB1;PSMB3;PSMC1;PSMC2;PSMC3;PSMC5;PSMC6;PSMD10;PSMD13;PSMD14;PSMD4;PSMD8;PSME1;RB1;RFWD2;RPS27L;TP63;TRIAPI1;UB

CDK2;CDK9;CDKN1B;CDT1;CHFR;CLRF3;DFB4;DGK2;DLG1;DNA2;ERCC2;FAM175A;FBXO31;HORMAD1;HSF1;MAD2L1;MAPKAPK2;MCM5;MDM2;MSH2;MUC1;NBN;ORC2;ORC3;ORC4;PKD2;PRCC;PSMA1;PSMA2;PSMA3;PSMA4;PSMA6;PSMA8;PSMB1;PSMB3;PSMC1;PSMC2;PSMC3;PSMC5;PSMC6;PSMD10;DXACB1;FRG1;FTSJ1;GEMIN2;GEMIN6;HARS2;HSD17B10;INTS12;INTS2;INTS5;INTS6;INTS8;KIAA0391;KRR1;L128A;L2M6;MARS2;MEPCE;METTL1;MKI67IP;MOC53;MPHOSPH6;MTO1;NARS2;NOC4L;NOL6;NOP2;NOP56;NOP58;NSA2;NUDT16;OSGPEL1;PES1;PHAX;PIN4;PIWIL4;POLG2;PPA1;PUS10;PUS7L;J

PSMC1;PSMC2;PSMC3;PSMC5;PSMC6;PSMD10;PSMD13;PSMD14;PSMD4;PSMD8;PSME1;RFWD2;RPS27L;TP63;TRIAPI1;UB  
8;CD2AP;CDC25C;CDC26;CDC27;CDK1;CDK11A;CDK11B;CDK2;CENPE;CENPK;CENPL;CENPQ;CENPW;CEP120;CETN3;CHFR;CHMP1A;CKS2;CSNK1A1;DAPK3;DCLRE1A;DCTN2;DDX11;DICE1R1;DIS3L2;DYNL2;E2F7;EREG;FANCM;FBXO5;GORASP1;HAUS1;HAUS3;HAU56;HAU57;HDAC3;HELLS;HORMAD1;HSF 2;MUC1;NBN;PRCC;PSMA1;PSMA2;PSMA3;PSMA4;PSMA6;PSMA8;PSMB1;PSMB3;PSMC1;PSMC2;PSMC3;PSMC5;PSMC6;PSMD10;PSMD13;PSMD14;PSMD4;PSMD8;PSME1;RB1;RFWD2;RPS27L;TP63;TRIAPI1;TTK;UBC;UBE2D1;UBE2A1;USP44;ZWILC

;PSMA4;PSMA6;PSMA8;PSMB1;PSMB3;PSMC1;PSMC2;PSMC3;PSMC5;PSMC6;PSMD10;PSMD13;PSMD14;PSMD4;PSMD8;PSME1;PTEN;TOPORS;UBC;UBE2D1;UBE2E1;UBE2N;USP44;XRCC  
;BMPR2;CAB39;CAMK1;CAMK2D;CAMK4;CCND3;CCNH;CDC7;CDK1;CDK11A;CDK11B;CDK17;CDK18;CDK2;CDK5R1;CDK7;CDK8;CDK9;CDK11;CDK12;CHUK;CKB;CLK1;CLK3;CLK4;CLP1;CMPK1;COASY;COL4A3BP;CRN3;CRIM1;CSK;CSNK1A1;CSNK1A1L;CSNK1G3;CSNK2B;DAK;DAPK3;DCAKD;DCK;DGKE;DGKZ

E2;CCNG2;CCNG2;CCNT2;CCNY;CCP110;CD2AP;CDC14A;CDC25C;CDC26;CDC7;CDK1;CDK2;CDK7;CENPE;CENPW;CETN3;CHFR;CHMP1A;CHMP18;CKAP2;CKS1B;CKS2;CNTROB;CSNK1A1;DAPK3;DAXX;DCLRE1A;DICE1R1;DIS3L2;DYNL3;E2F7;ECT2;ERCC2;EREG;FBXO5;FGF7;GNAI1;GTPBP8;HAUS1;HAUS3;HAL  
MAA;PSMA6;PSMA8;PSMB1;PSMB3;PSMC1;PSMC2;PSMC3;PSMC5;PSMC6;PSMD10;PSMD13;PSMD14;PSMD4;PSMD8;PSME1;PTEN;RB1;RFWD2;RPS27L;TP3;TP63;TRIAPI1;UB

DAP1;ADORA1;AGAP2;AGAP3;AGFG2;AGL;AKT1;ALDH4A1;ALDOA;ANAPC10;APC;ARAP2;ARF4;ARFGAP1;ARFGAP2;ARHGAP5;ARL2;ARL8B;ARRB1;ASAP3;ATL2;EIF4C;ATP5C1;ATP5E;ATP5F1;ATP5I;ATP5L;ATP5O;AUH;BAG6;BAP1;BCAT1;BCAT2;BKDHB;BDH2;BIN1;BIRC2;BNIP2;BNIP3L;CASP3;CASP8;CCBL2;CCN  
PT1;GMPPA;LMAN1;MAGT1;MAN1A1;MAN1A2;MAN2A1;MANEA;MGAT1;MGAT2;MGAT4A;MPI;OSTC;PGM3;PRKCSH;SAR1B;SEC13;SEC23A;SEC24A;STB3;UBE2J1;UGGT

\*K3;MEF2A;MEF2C;NFKB2;NFKB1;PELI1;RIPK2;RPS6KA3;RPS6KA5;TAB1;TAB2;TAB3;TLR6;UBC;UBE2N  
;PSMB3;PSMC1;PSMC2;PSMC3;PSMC5;PSMC6;PSMD10;PSMD13;PSMD14;PSMD4;PSMD8;PSME1;PTEN;UBC;UBE2D1;UBE2E1;USP4

RL1;DHRS9;DMPK;DOLPP1;ELOVL4;ERN1;EXTL2;FITM1;FMOS;HLA-A;HLA-DPB1;HLA-DRA;INSIG1;INSIG2;L2HGDD;L2HGDS;L3FN;MARCH6;MEF11A;PEX11G;PEX12;PEX13;PEX2;PEX3;PGAP1;PGAP3;PIGB;PIGK;PIGS;PIGZ;PKD2;PORCN;PQLC2;RER1;RFNG;RHOT1;SACM1L;SAMD8;SEC61A1;SERAC1;SGMS1  
AB39;CAMK1;CAMK2D;CAMK4;CCND3;CCNH;CDC7;CDK1;CDK11A;CDK11B;CDK17;CDK18;CDK2;CDK5R1;CDK7;CDK8;CDK9;CDK11;CDK12;CHUK;CLK1;CLK3;CLK4;COL4A3BP;CPNE3;CRIM1;CSK;CSNK1A1;CSNK1A1L;CSNK1G3;CSNK2B;DAK;DAPK3;DCAKD;DCK;DGKE;DGKZ;DMPK;DYRK1A;DYRK1B;DYRK2;EFNA3;ENG;EPHB3;EPHB6;ERCC2;

CKDH;C10orf2;CBR4;DEC1;DHFRL1;DHX30;DLAT;DNA2;ECHS1;ERALL1;ETFA;FARS2;GLS;GRPEL2;GUF1;HARS2;HMGL1;HSD17B10;HSPE1;IDH2;IDH3B;IDH3G;KIAA1967;LONP1;MARS2;MCEE;MCL1;MDH2;MRPL13;MRPL18B;MRPL28;MRPL3;MRPL32;MRPL37;MRPL39;MRPL40;MRPL42;MRPL47;MRPL48;MI  
;AIM2;AKAP5;AKR1B1;AKT1;ALDH4A1;ALDOA;AMD1;ANG;ANKRD49;APEX1;ARGLU1;ARHGAP22;ARHGFE2;ARID2;ARID4;ARID4B;ARID5A;ARID5B;ARRB1;ASF1A;ASPH;ATAD2;ATF1;ATF2;ATP2B1;ATP2C1;ATP5C1;ATP5E;ATP5F1;ATP5I;ATP5L;ATP5O;ATP7A;ATRX;ATXN7L3;BACH1;BAZ1A;BAZ2B;BBX;BCLAF

PT1;GMPPA;LMAN1;MAN1A1;MAN1A2;MAN2A1;MANEA;MGAT1;MGAT2;MGAT4A;MPI;OSTC;PGM3;PRKCSH;SAR1B;SEC13;SEC23A;SEC24A;STB3;UBE2J1;UGGT  
;INSIG1;INSIG2;MID1IP1;MLYCD;NQO1;NR1H2;NR3C1;PDHX;PDK1;PKD2;PDP1;PRKAA1;PRKAB2;PRKAG2;PSMA1;PSMA2;PSMA3;PSMA4;PSMA6;PSMA8;PSMB1;PSMB3;PSMC1;PSMC2;PSMC3;PSMC5;PSMC6;PSMD10;PSMD13;PSMD14;PSMD4;PSMD8;PSME1;PTGS2;REST;SCAP;SIRT1;SMEK1;SMEK2;SREB

IAPKAPK3;MEF2A;MEF2C;NFKB2;NFKB1;PELI1;RIPK2;RPS6KA3;RPS6KA5;TAB1;TAB2;TAB3;TLR6;UBC;UBE2N  
NRNPH2;HNRNPL;MID6;LSM1;LSM3;MBNL1;MBNL2;NAA38;NUDT21;PAPOLA;PCF11;PHAX;PHF5A;PLRG1;POLR2E;POLR2K;PPL3;PPWD1;PRPF31;PRPF4B;PRPF6;PSIP1;PTBP2;RALY;RFBFX3;RBM25;RBM4;RBM5;SART1;SCAF11;SF3A1;SF3A2;SF3B1;SF3B1A;SFSWAP;SKIV2L2;SLU7;SMNDC1;SNRNP;SNRNP2;

5A;RAB8B;RAB9B;RAP1B;RHEB;TRIM2  
K5R1;CDK5RAP3;CDK7;CDKN1B;CDKN1C;CDK25C;CDK37;CDK5R1;CDK5RAP3;CDKN2C;CDKN3;CKS1B;CKS2;CNPPD1;GTF2H1;KAT2B;MEN1;MNAT1;PKD2;PSMD10;PTEN;TFAP4

5;HLA-DMA;HLA-DRA;KCNQ1;LAMTOR3;LDLR;MAP2K2;MARCH1;MCOLN1;MITD1;NDPIP2;PIKFYVE;RAB14;RAB27B;RNF13;SDF4;SLC29A3;SLC40A1;SNX16;STARD3;STARD3NL;TMEM106B;TMEM55A;TPT1;UNC13D;VAC14;VAMP7;VPS18;VPS28;VPS33B;VPS36;VPS37B;VPS4A;VPS4  
PT1;GMPPA;LMAN1;MAN1A1;MAN1A2;MAN2A1;MANEA;MGAT1;MGAT2;MGAT4A;MPI;OSTC;PGM3;PRKCSH;SAR1B;SEC13;SEC23A;SEC24A;STB3;UBE2J1;UGGT

;PSMB3;PSMC1;PSMC2;PSMC3;PSMC5;PSMC6;PSMD10;PSMD13;PSMD14;PSMD4;PSMD8;PSME1;PTEN;SKP2;UBC;UBE2D1;UBE2E1;USP4  
IY1;RNF11;RNF144B;RNF146;RNF217;SIAH1;SMURF2;SUMO3;UBE3A;UBRS;WWP

CNE2;CCNH;CCNL1;CCNT2;CCNY;CCNYL1;CDC25C;CDC37;CDK5R1;CDK5RAP3;CDKN2C;CEP152;CEP250;CNPPD1;CRY1;DAB2IP;DIXD1;DLG1;DUSP19;EEF1A1;FAS;FBXO5;FER;FGFR1OP;FIZ1;GLRX3;GSTP1;HDAC5;HDAC7;HDAC9;HINT1;IBTK;IGBP1;ILK;ITGA;JAK2;JUP;KAT2B;KIF11;LIPE;LLGL1;MAP3K1;MAF  
AB39;CAMK1;CAMK2D;CAMK4;CCND3;CCNH;CDC7;CDK1;CDK11A;CDK11B;CDK17;CDK18;CDK2;CDK5R1;CDK7;CDK8;CDK9;CDK11;CDK12;CHUK;CLK1;CLK3;CLK4;COL4A3BP;CPNE3;CRIM1;CSK;CSNK1A1;CSNK1A1L;CSNK1G3;CSNK2B;DAK;DAPK3;DCAKD;DCK;DGKE;DGKZ;DMPK;DYRK1A;DYRK1B;DYRK2;EFNA3;ENG;EPHB3;EPHB6;ERCC2;

ISPH;ATG4C;BAGP29;BCAP31;BLZF1;BMPR1A;CAMK1;CAMK4;CD27;CDC37;CDK1;CDK5R1;CEP57;CHCHD4;CHER;CHM;CHML;COG3;COP21;CSK;DAB2IP;DDOST;DERL1;DMAP1;DYRK2;ECT2;ERBB2IP;EXPH5;GAS6;GCC2;GIPC1;GOLGA4;GOPC;GRPEL2;HDAC6;HGS;INPP5K;IPO11;IPO13;IPO4;JAK2;JUN;JUP;K/ 7;FEM1A;HSPBP1;LRKK2;MAD2L1;MALT1;NDPIP1;NDPIP2;PELI1;PSMA1;PSMA2;PSMA3;PSMA4;PSMA6;PSMA8;PSMB1;PSMB3;PSMC1;PSMC2;PSMC3;PSMC5;PSMC6;PSMD10;PSMD13;PSMD14;PSMD4;PSMD8;PSME1;PTEN;RASSF1;RCHY1;RIPK2;RNF139;SUMO3;TGFB1;TICAM1;TOPORS;UBC;UBE2D1;I

;PEX2;ARFGAP1;ARL2;ATAD3A;ATP11B;ATP5C1;ATP5E;ATP5F1;ATP5I;ATP5L;ATP5O;BMF;BNIP1;BNIP2;BNIP3L;BRIP1;C14orf2;CAPG;CASP8;CBX3;CCDC90A;CEP70;CEPT1;CERS5;CHCHD4;CISD1;CISD2;CNP;COASY;COQ10B;COQ2;COX16;COX6C;COX7A2;COX7B;COX7C;CRAT;CRLS1;CST3;CTDNEP1;J  
;CAMK4;CD27;CDC40;CDK1;CEP57;CHCHD4;CHER;CLIC2;CPG1;CSK;DAB2IP;DDOST;DMAP1;DYRK2;ECT2;EEA1;EIF4E;EIF6;EROP1;GAS6;GCC2;GOLGA4;GOPC;GRPEL2;GSTM2;GTM2;HGS;HMGB4;HOOK1;HOOK2;IBTK;INSIG1;IPO11;IPO13;JAK2;JUN;JUP;KNA2;KPN3A;KPNAS5;LLGL1;LMAN1;LMN

USP46;USP6;VCP1P1;YOD1;ZNRANB1  
AC2;PSMC3;PSMC5;PSMC6;PSMD10;PSMD13;PSMD14;PSMD4;PSMD8;PSME1;UBC;UBE2D1;UBE2E1;USP4

VCM5;MNAT1;ORC2;ORC3;ORC4;POLD2;PSMA1;PSMA2;PSMA3;PSMA4;PSMA6;PSMA8;PSMB1;PSMB3;PSMC1;PSMC2;PSMC3;PSMC5;PSMC6;PSMD10;PSMD13;PSMD14;PSMD4;PSMD8;PSME1;RBL1;RFC2;RFC3;RFC5;SKP2;TFAP4;UBC;WEE

RPL28;MRPL3;MRPL32;MRPL37;MRPL39;MRPL40;MRPL42;MRPL47;MRPL48;MRPL50;MRPS10;MRPS17;MRPS18B;MRPS18C;MRPS2;MRPS22;MRPS28;MRPS31;MRPS33;NUFIP2;DMX3;RBM3;RBL1;RPL15;RPL17;RPL22L1;RPL23;RPL26;RPL27;RPL30;RPL31;RPL34;RPL35;RPL36A;RPL36AL;RPL39;I  
SNA1;BAP1;BCAS2;BCLAF1;BMI1;BRWD1;BTDD;BYSL;C8orf40;CAMK4;CAPG;CCDC86;CD2AP;CDKN2AIP;CENPW;COIL;CRBN;CUL1;DACH1;DAXX;DCAF13;DCLRE1A;DDX11;DDX50;DDX54;DNAJB9;DNTTIP2;ER11;ESF1;FAM32A;FBXO11;FBXW7;FCF1;FMR1;FRG1;FXR1;G2E3;GNL3;GORAB;GRWD1;GTPBP10;GZF

EFSEC;EIF1AX;EIF2A;EIF2B5;EIF2S2;EIF3D;EIF3E;EIF3J;EIF4E;EIF4F;EIF4G;EIF4H;EIF4I;EIF4J;EIF4K;EIF4L;EIF4M;EIF4N;EIF4O;EIF4P;EIF4Q;EIF4R;EIF4S;EIF4T;EIF4U;EIF4V;EIF4W;EIF4X;EIF4Y;EIF4Z;EIF5A;EIF5B;EIF5C;EIF5D;EIF5E;EIF5F;EIF5G;EIF5H;EIF5I;EIF5J;EIF5K;EIF5L;EIF5M;EIF5N;EIF5O;EIF5P;EIF5Q;EIF5R;EIF5S;EIF5T;EIF5U;EIF5V;EIF5W;EIF5X;EIF5Y;EIF5Z;FARS2;FARSA;FDXACB1;FMR1;FXR1;GAPDH;GFM2;GUF1;HARS2;HBS1L;HRSF12;IGF2BP3;IGHMBP2;IMPACT;IREB2;LIN28A;MARS2;MRPL1;MRPL13;MRPL15;MRPL18;MRPL19;MRPL2;MRPL22;MRPL28;MRPL3;MRPL32;

RPF31;PRPF6;RBM3;RCTOR;RNF135;SEC61A1;SRP9;UHMK1  
RIDS5;ARRB1;ATG5;BAG4;BAG6;BIM1;BMPR1A;BMPR2;BRMS1;CAB39;CAMK1;CASP3;CCDC88A;CCNA2;CCNC;CCND3;CCNE2;CCNG1;CCNH;CCNL1;CCNT2;CCNY;CCNYL1;CD28;CD80;CD81;CDC25C;CDC26;CDC27;CDC37;CDK1;CDK2;CDK5R1;CDK5RAP3;CDK7;CDK9;CDKN1B;CDKN1C;CDKN2C;CDKN3;CENPE;  
MED8;MED

\*SMC1;PSMC2;PSMC3;PSMC5;PSMC6;PSMD10;PSMD13;PSMD14;PSMD4;PSMD8;PSME1;PTEN;TOPORS;UBC;UBE2D1;UBE2E1;UBE2F  
DNA2;E2F7;FBXO31;MDM2;MUC1;NBN;PKD2;PKIA;PSMA1;PSMA2;PSMA3;PSMA4;PSMA6;PSMA8;PSMB1;PSMB3;PSMC1;PSMC2;PSMC3;PSMC5;PSMC6;PSMD10;PSMD13;PSMD14;PSMD4;PSMD8;PSME1;PTEN;RAD17;RB1;RFWD2;RPS27L;TFAP4;TJP3;TP63;TRIP1;UB  
);INTS2;INTS5;INTS6;INTS8;KIAA0391;KRR1;LIN28A;LSM6;METTL1;MOCSS3;MPHOSPH6;MTO1;NOC4L;NOL6;NOP2;NOP5B;NOP58;NSA2;NUDT16;OSGEP11;PES1;PIN4;PUS10;PUS7L;RPF1;RPL11;RPL26;RPL7;RPS24;RPS7;RRP1;RRP36;RRP8;SIRT1;SKIV2L2;SMAD2;SUV39H1;TRDMT1;TRMT12;TRNT1;TRUB1;T  
\*SMAB;PSMB1;PSMB3;PSMC1;PSMC2;PSMC3;PSMC5;PSMC6;PSMD10;PSMD13;PSMD14;PSMD4;PSMD8;PSME1;PTEN;TOPORS;UBC;UBE2D1;UBE2E1;UBE2Z;USP4

;PSMC2;PSMC3;PSMC5;PSMC6;PSMD10;PSMD13;PSMD14;PSMD4;PSMD8;PSME1;PTEN;UBC;UBE2D1;UBE2E  
);C14orf2;CBX3;CCDC90A;CNP;COQ10B;COX6C;COX7A2;COX7B;COX7C;CRAT;CRLS1;CYCS;DHFR1L1;DHRS1;ERAL1;ERN1;FAM169A;GPAM;GPD2;GRPEL2;GUF1;HIGD1A;HMGCL;HSD17B10;IDH2;JMM1P1;KMO;L2HGDH;LEMDS;LMNB2;MATR3;MCU;MDH2;MPV17;MTHFD2L;NDUFA1;NDUFA4;NDUF  
G;PEX12;PEX13;PEX14;PEX2;PEX3;PNPLA8;RAB8E  
G;PEX12;PEX13;PEX14;PEX2;PEX3;PNPLA8;RAB8E

2;HNRNP1;JMJ26;LSM3;MBNL1;MBNL2;NAA38;NUDT21;PAPOLA;PCF11;PHAX;PHF5A;PLRG1;POLR2E;POLR2K;PPL3;PPWD1;PRPF31;PRPF4B;PRPF6;PSIP1;PTBP2;RALY;RBF0X3;RBM25;RBM4;RBM5;SART1;SCAF11;SF3A1;SF3A2;SF3B1;SF3B14;SFSWAP;SKIV2L2;SLU7;SNRPB;SNRPB2;SNRPD1;SNRPE;SNRPG  
2;HNRNP1;JMJ26;LSM3;MBNL1;MBNL2;NAA38;NUDT21;PAPOLA;PCF11;PHAX;PHF5A;PLRG1;POLR2E;POLR2K;PPL3;PPWD1;PRPF31;PRPF4B;PRPF6;PSIP1;PTBP2;RALY;RBF0X3;RBM25;RBM4;RBM5;SART1;SCAF11;SF3A1;SF3A2;SF3B1;SF3B14;SFSWAP;SKIV2L2;SLU7;SNRPB;SNRPB2;SNRPD1;SNRPE;SNRPG  
3;PEX14;PEX2;PEX3;PMAIP1;PMPCA;RAB6A;RAB8B;RPL11;RPL15;RPL17;RPL23;RPL30;RPL31;RPL34;RPL35;RPL36A;RPL39;RPL41;RPL7;RPL9;RPS15A;RPS24;RPS27;RPS29;RPS3A;RPS7;SEC11A;SEC11C;SEC61A1;SNX16;SPCS2;SPCS3;SRP14;SRP19;SRP9;SSR3;TIMM17A;TIMM22;TIMM2  
2;TGFA;TKK

\*K3;MEF2A;MEF2C;NFKB2;NFKBIB;PEL1;RIPK2;RPS6KA3;RPS6KA5;TAB1;TAB2;TAB3;TLR10;TLR6;UBC;UBE2N  
.PEX2;ARFGAP1;ARL2;ATAD3A;ATP11B;ATP5C1;ATP5E;ATP5F1;ATP5I;ATP5L;ATP5O;BMF;BNIP1;BNIP2;BNIP3L;BRIP1;C14orf2;CAPG;CASP8;CBX3;CCDC90A;CEP70;CEPT1;CERS5;CHCH4;CISD1;CISD2;CNP;COASY;COQ10B;COQ2;COX16;COX6C;COX7A2;COX7B;COX7C;CRAT;CRLS1;CST3;CTDNEP1;I  
TMEID10;TMEID2;TMX1;TRAPP1;TRAPP2;TRAPP3;VAMP7;YKT  
IRPG;SRSF10;SRSF6

.PSMC3;PSMC5;PSMC6;PSMD10;PSMD13;PSMD14;PSMD4;PSMD8;PSME1;RFWD2;TRIP1;UBK  
.PSMC3;PSMC5;PSMC6;PSMD10;PSMD13;PSMD14;PSMD4;PSMD8;PSME1;RFWD2;TRIP1;UBK  
.PSMC3;PSMC5;PSMC6;PSMD10;PSMD13;PSMD14;PSMD4;PSMD8;PSME1;RFWD2;TRIP1;UBK  
.PSMC3;PSMC5;PSMC6;PSMD10;PSMD13;PSMD14;PSMD4;PSMD8;PSME1;RFWD2;TRIP1;UBK

.PSMC3;PSMC5;PSMC6;PSMD10;PSMD13;PSMD14;PSMD4;PSMD8;PSME1;RFWD2;TRIP1;UBK  
CF3;ACAD10;ACAD9;ACADM;ACAD8;ACAD5;ACAD3;ACBD3;ACBD5;ACB07;ACSF2;ACSF3;ACSL4;ACSL6;ACSS1;ACTL6A;ACTR1A;ACVR1;ACVR2A;ACVRL1;ADAP1;ADC1;ADC2;ADC3;ADRBK1;ADSSL1;AGAP2;AGAP3;AGPS;AIFM3;AK3;AKAP7;AKD1;AKT1;ANG;ANKK1;ARAF;ARAP2;ARF4;ARHGAP5;ARL13  
);MEF2A;MEF2C;NFKB2;NFKBIB;PEL1;RIPK2;RPS6KA3;RPS6KA5;TAB1;TAB2;TAB3;TBK1;TICAM1;UBC

88B;CCP110;CDK1;CDK2;CDK5R1;CDKN1B;CENPE;CEP120;CEP135;CEP152;CEP250;CEP57;CEP57L1;CETN3;CHORDC1;CKAP2;CKS2;CLIP3;CLN3;CNP;CNTR0B;CRIP1;DCTN2;DICER1;DNAH6;DTNBP1;DYNLRB1;ECT2;FBXO5;FER;FGFR1OP;FOPNL;GAPDH;GAS2L2;GCC2;HAUS1;HAUS3;HAUS6;HAUS7;HDAC3;HD  
XACB1;FIGLN1;GSS;GTPBP10;HMGCL;HPR11;ICK;IDH2;IDH3B;IDH3G;IDI1;LHPP;MAP3K13;MAP3K7;MAP3K8;MAST2;MAST4;MSH2;MST4;MTHFD2;NLK;NTS3;NUDT16;OPAL1;PAPOLA;PDXK;PGM3;PPA1;PPM1B;PRKACB;PRPS2;PRPSA1;PRTFDC1;PTEN;REV1;RPS6K3;RPS6KA4;RPS6KA5;S100P;SNRK;STK  
M11;MCM5;MNA1;ORC2;ORC3;ORC4;POLD2;PSMA1;PSMA2;PSMA3;PSMA4;PSMA6;PSMA8;PSMB1;PSMB3;PSMC1;PSMC2;PSMC3;PSMC5;PSMC6;PSMD10;PSMD13;PSMD14;PSMD4;PSMD8;PSME1;RB1;RFC2;RFC3;RFC5;SKP2;TFAP4;UBC;WEE

IDE1;NSL1;NUDCD2;NUF2;NUP37;NUP85;ORC2;PMF1;PPP1CC;PPP1R12A;PSEN2;RANGAP1;SEC13;SEPT7;SGOL2;SKA2;SPAG5;SS18L1;SUMO3;XPO1;ZWILCH  
RS9;DMPK;DOLPP1;ELOVL4;ERN1;FITM1;HLA-A;HLA-DPB1;HLA-DRA;INSIG1;INSIG2;L2HGDH;LEMDS3;LFNG;MARCH6;MFF;PEX11A;PEX11G;PEX12;PEX13;PEX2;PEX3;PIGK;PIGS;PKD2;PORCN;PQLC2;RER1;RFNG;RHOT1;SACM1L;SAMD8;SEC61A1;SGMS1;SGMS2;SLC24A6;SSR3;ST8SIA4;STEAP2;SYP;TECR;TIM  
\*BP2;APPL1;ARFIP1;ARHGEF2;ARL2;ARL6P1;ASPH;ATG4C;ATG9A;AURKC;BAG4;BAG6;BCAP29;BCAP31;BLZF1;BMPR1A;CAMK1;CAMK4;CASC5;CD27;CD63;CDC37;CDK1;CDK5R1;CEP57;CEP57L1;CHCH4;CHERP;CHM;CHML;CLIP3;COG3;COP21;CSK;CTDNEP1;DAB2IP;DBN1;DDOST;DENND4C;DERL1;DLG1;D

;ATP5F1;ATP5I;ATP5L;ATP5O;BMF;BNIP3;C14orf2;CASP8;CCDC90A;CISD1;CISD2;CNP;COASY;COQ10B;COQ2;COX16;COX6C;COX7A2;COX7A2L;COX7B;COX7C;CRAT;CRLS1;CYCS;DDX3X;DHFR1L1;DHRS1;DMPK;ERAL1;GK;GPAM;GPAT2;GPD2;GRPEL2;GUF1;HIGD1A;HMGCL;HSD17B10;IDH2;JMM1P1;KMO;L2  
.AMEF2C;NFKB2;NFKBIB;RIPK2;RPS6KA3;RPS6KA5;TAB1;TAB2;TAB3;TBK1;TICAM1;UBC

.PSMC3;PSMC5;PSMC6;PSMD10;PSMD13;PSMD14;PSMD4;PSMD8;PSME1;RFWD2;TRIP1;UBK  
.PSMC3;PSMC5;PSMC6;PSMD10;PSMD13;PSMD14;PSMD4;PSMD8;PSME1;RFWD2;TRIP1;UBK  
.PSMC3;PSMC5;PSMC6;PSMD10;PSMD13;PSMD14;PSMD4;PSMD8;PSME1;RFWD2;TRIP1;UBK  
.PSMC3;PSMC5;PSMC6;PSMD10;PSMD13;PSMD14;PSMD4;PSMD8;PSME1;RFWD2;TRIP1;UBK

\*K3;MEF2A;MEF2C;NFKB2;NFKBIB;PEL1;RIPK2;RPS6KA3;RPS6KA5;TAB1;TAB2;TAB3;TBK1;TICAM1;TLR6;UBC;UBE2N  
);CABIN1;CASC5;CBX3;CD27;CDK2;CDK9;CENPK;CENPQ;CENPW;CHD1;CHD5;CHD9;CTBP1;CXCC1;DAPK3;DEK;DMAP1;DOT1L;DPY30;DR1;EHMT2;EID1;ELK4;ENY2;EP2C;FAM175A;HDAC3;HDACS;HDAC6;HDAC8;HDAC9;HELLS;HIRA;HLTF;HMGNS;HNF1A;HSF4;ING3;ITGB3BP;JAK2;JMJ26;KAT2B;KAT8;LRW

JRA1;ADRBK1;AGAP2;AGAP3;AIM2;AKAP5;AKT1;AKTIP;ALKBH5;ANG;ANXA1;AP1AR;AP1B1;AP1S2;AP2A2;AP3M1;AP3S2;APOO;APBP2;APPL1;ARF4;ARFGAP1;ARFGAP2;ARHGEF2;ARFIP1;ARHGEF2;ARL6P1;ARL6IP5;ARPP19;ARRB1;ARV1;ASPH;ATG16L2;ATG4A;ATG4B;ATG4C;ATG9A;ATP10D;ATP11B;ATP  
DAP1;ADORA1;AGAP2;AGAP3;AGFG2;AGL;AKT1;ALDH4A1;ALDOA;ANAPC10;APC;ARAP2;ARF4;ARFGAP1;ARFGAP2;ARHGAP5;ARL2;ARL8B;ARRB1;ASAP3;ATG12;ATG16L2;ATG4A;ATG4B;ATG4C;ATG5;ATG9A;ATL2;ATP5C1;ATP5E;ATP5F1;ATP5I;ATP5L;ATP5O;AUH;BAG6;BAP1;BCAT1;BCAT2;BKDHB;BDH2

;LDLR;LPCAT1;LPCAT2;LPCAT4;MBOAT1;NQO1;PDE1B;PLA2G15;PLA2G4A;PNPLA6;PNPLA8;PSMA1;PSMA2;PSMA3;PSMA4;PSMA6;PSMA8;PSMB1;PSMB3;PSMC1;PSMC2;PSMC3;PSMC5;PSMC6;PSMD10;PSMD13;PSMD14;PSMD4;PSMD8;PSME1;SAMDB;SAT1;SCARB1;SGMS1;SGMS2;SLC27A1;SLC44A3;S  
KD1;APBP2;ARF4;ARHGAP5;ARL2;ARL8B;ASNA1;ATAD1;ATAD2;ATAD2B;ATAD3A;ATL2;ATP10D;ATP11B;ATP11C;ATP13A2;ATP13A3;ATP2B1;ATP2C1;ATP5C1;ATP5E;ATP5F1;ATP5I;ATP5L;ATP5O;ATP6A1;ATP7A;ATP8A1;ATP8A2;ATP8B4;ATRX;BRIP1;BTAFA1;C10orf2;CCNH;CDK7;CENPE;CGN;CHD1;CHD5;  
KD1;APBP2;ARF4;ARHGAP5;ARL2;ARL8B;ASNA1;ATAD1;ATAD2;ATAD2B;ATAD3A;ATL2;ATP10D;ATP11B;ATP11C;ATP13A2;ATP13A3;ATP2B1;ATP2C1;ATP5C1;ATP5E;ATP5F1;ATP5I;ATP5L;ATP5O;ATP6A1;ATP7A;ATP8A1;ATP8A2;ATP8B4;ATRX;BRIP1;BTAFA1;C10orf2;CCNH;CDK7;CENPE;CGN;CHD1;CHD5;  
HRS9;DKK3;DLAT;FGFR4;GNMT;INSIG1;INSIG2;KMO;MID1IP1;MLYCD;NQO1;NR1H2;NR3C1;OXCT1;PDHX;PDK1;PDK2;PDP1;PDSS1;PRKAA1;PRKAB2;PRKAG2;PSMA1;PSMA2;PSMA3;PSMA4;PSMA6;PSMA8;PSMB1;PSMB3;PSMC1;PSMC2;PSMC3;PSMC5;PSMC6;PSMD10;PSMD13;PSMD14;PSMD4;PSMD8;F  
CCNL1;CCNT2;CCNY;CCNYL1;CCDC25C;CDC37;CDK5R1;CDK5RAP3;CKDN2C;CEP152;CEP250;CNPPD1;CRY1;DAB2IP;DIXD1;DLG1;DUSP19;EEF1A1;FBXO5;FER;FGFR1OP;F12;GLRX3;GSTP1;HDACS;HDAC7;HDAC9;HINT1;IBTK;IGBP1;ILK;ITGA9;JAK2;JUP;KAT2B;KIF11;LIPE;LLGL1;MAP3K1;MAP3K11;MAP3K13;  
SENP1;SOCS5;SUMO1;SUMO2;TAF9;TRIB2;UBE2V2;UCHL5;USP14;USP4;USP1

MSH2;MUC1;NBN;PSMA1;PSMA2;PSMA3;PSMA4;PSMA6;PSMA8;PSMB1;PSMB3;PSMC1;PSMC2;PSMC3;PSMC5;PSMC6;PSMD10;PSMD13;PSMD14;PSMD4;PSMD8;PSME1;RAD17;RBBP8;RFWD2;RINT1;RPS27L;TAOK1;TIPLR;TP63;TRIP1;UB  
AC2;PSMC3;PSMC5;PSMC6;PSMD10;PSMD13;PSMD14;PSMD4;PSMD8;PSME1;UBC;UBE2D1;UBE2E1;USP4  
AC2;PSMC3;PSMC5;PSMC6;PSMD10;PSMD13;PSMD14;PSMD4;PSMD8;PSME1;UBC;UBE2D1;UBE2E1;USP4  
D28;CDC25C;CDC26;CDC27;CDC7;CDK1;CDK2;CDK9;CDKN1B;CDT1;CHFR;CHMP1A;CHORDC1;CLRF3;CUL4B;DAPK3;DBF4;DDX3X;DGK2;DLG1;DNA2;E2F7;ECT2;ERCC2;EREG;FAM175A;FBXO31;FBXO5;FBXW7;HDAC8;HORMAD1;HSF1;KIF20B;KIF23;MAD2L1;MAPKAPK2;MCM5;MDM2;MSH2;MUC1;I

;LDLR;LPCAT1;LPCAT2;LPCAT4;MBOAT1;NQO1;PDE1B;PLA2G15;PLA2G4A;PNPLA6;PNPLA8;PSMA1;PSMA2;PSMA3;PSMA4;PSMA6;PSMA8;PSMB1;PSMB3;PSMC1;PSMC2;PSMC3;PSMC5;PSMC6;PSMD10;PSMD13;PSMD14;PSMD4;PSMD8;PSME1;SAMDB;SAT1;SCARB1;SG  
IQ;LCAT;LDLR;LPCAT1;LPCAT2;LPCAT4;MBOAT1;MTHFD2L;MTRR;NQO1;PDE1B;PHGDH;PLA2G15;PLA2G4A;PNPLA6;PNPLA8;PSMA1;PSMA2;PSMA3;PSMA4;PSMA6;PSMA8;PSMB1;PSMB3;PSMC1;PSMC2;PSMC3;PSMC5;PSMC6;PSMD10;PSMD13;PSMD14;PSMD4;PSMD8;PSME1;SAMDB;SAT1;SCARB1;SG  
);GAPAM;GPAT2;GPCPD1;ID1;IMPA1;INPP5D;INPP5K;LCAT;LCAT1;LPCAT1;LPCAT2;LPCAT4;LPGAT1;MBOAT1;MTMR2;MTMR6;MTMR7;PGAP1;PGAP3;PI4K2B;PIGA;PIGB;PIGF;PIGK;PIGM;PIGS;PIGW;PIGY;PIGZ;PIK3C2A;PIK3CA;PIKFYVE;PLA2G4A;PLD2;PLD3;PLD4;PNPLA2;PNPLA8;PTEN;SACM1L;SAMDB;SE  
KD1;APBP2;ARF4;ARHGAP5;ARL2;ARL8B;ASNA1;ATAD1;ATAD2;ATAD2B;ATAD3A;ATL2;ATP10D;ATP11B;ATP11C;ATP13A2;ATP13A3;ATP2B1;ATP2C1;ATP5C1;ATP5E;ATP5F1;ATP5I;ATP5L;ATP5O;ATP6A1;ATP7A;ATP8A1;ATP8A2;ATP8B4;ATRX;BRIP1;BTAFA1;C10orf2;CCNH;CDK7;CENPE;CGN;CHD1;CHD5;  
KD1;APBP2;ARF4;ARHGAP5;ARL2;ARL8B;ASNA1;ATAD1;ATAD2;ATAD2B;ATAD3A;ATL2;ATP10D;ATP11B;ATP11C;ATP13A2;ATP13A3;ATP2B1;ATP2C1;ATP5C1;ATP5E;ATP5F1;ATP5I;ATP5L;ATP5O;ATP6A1;ATP7A;ATP8A1;ATP8A2;ATP8B4;ATRX;BRIP1;BTAFA1;C10orf2;CCNH;CDK7;CENPE;CGN;CHD1;CHD5;  
HRS9;DKK3;DLAT;FGFR4;GNMT;INSIG1;INSIG2;KMO;MID1IP1;MLYCD;NQO1;NR1H2;NR3C1;OXCT1;PDHX;PDK1;PDK2;PDP1;PDSS1;PRKAA1;PRKAB2;PRKAG2;PSMA1;PSMA2;PSMA3;PSMA4;PSMA6;PSMA8;PSMB1;PSMB3;PSMC1;PSMC2;PSMC3;PSMC5;PSMC6;PSMD10;PSMD13;PSMD14;PSMD4;PSMD8;F  
CCNL1;CCNT2;CCNY;CCNYL1;CCDC25C;CDC37;CDK5R1;CDK5RAP3;CKDN2C;CEP152;CEP250;CNPPD1;CRY1;DAB2IP;DIXD1;DLG1;DUSP19;EEF1A1;FBXO5;FER;FGFR1OP;F12;GLRX3;GSTP1;HDACS;HDAC7;HDAC9;HINT1;IBTK;IGBP1;ILK;ITGA9;JAK2;JUP;KAT2B;KIF11;LIPE;LLGL1;MAP3K1;MAP3K11;MAP3K13;  
SENP1;SOCS5;SUMO1;SUMO2;TAF9;TRIB2;UBE2V2;UCHL5;USP14;USP4;USP1

MSH2;MUC1;NBN;PSMA1;PSMA2;PSMA3;PSMA4;PSMA6;PSMA8;PSMB1;PSMB3;PSMC1;PSMC2;PSMC3;PSMC5;PSMC6;PSMD10;PSMD13;PSMD14;PSMD4;PSMD8;PSME1;RAD17;RBBP8;RFWD2;RINT1;RPS27L;TAOK1;TIPLR;TP63;TRIP1;UB  
AC2;PSMC3;PSMC5;PSMC6;PSMD10;PSMD13;PSMD14;PSMD4;PSMD8;PSME1;UBC;UBE2D1;UBE2E1;USP4  
AC2;PSMC3;PSMC5;PSMC6;PSMD10;PSMD13;PSMD14;PSMD4;PSMD8;PSME1;UBC;UBE2D1;UBE2E1;USP4  
D28;CDC25C;CDC26;CDC27;CDC7;CDK1;CDK2;CDK9;CDKN1B;CDT1;CHFR;CHMP1A;CHORDC1;CLRF3;CUL4B;DAPK3;DBF4;DDX3X;DGK2;DLG1;DNA2;E2F7;ECT2;ERCC2;EREG;FAM175A;FBXO31;FBXO5;FBXW7;HDAC8;HORMAD1;HSF1;KIF20B;KIF23;MAD2L1;MAPKAPK2;MCM5;MDM2;MSH2;MUC1;I

;LDLR;LPCAT1;LPCAT2;LPCAT4;MBOAT1;NQO1;PDE1B;PLA2G15;PLA2G4A;PNPLA6;PNPLA8;PSMA1;PSMA2;PSMA3;PSMA4;PSMA6;PSMA8;PSMB1;PSMB3;PSMC1;PSMC2;PSMC3;PSMC5;PSMC6;PSMD10;PSMD13;PSMD14;PSMD4;PSMD8;PSME1;SAMDB;SAT1;SCARB1;SG  
IQ;LCAT;LDLR;LPCAT1;LPCAT2;LPCAT4;MBOAT1;MTHFD2L;MTRR;NQO1;PDE1B;PHGDH;PLA2G15;PLA2G4A;PNPLA6;PNPLA8;PSMA1;PSMA2;PSMA3;PSMA4;PSMA6;PSMA8;PSMB1;PSMB3;PSMC1;PSMC2;PSMC3;PSMC5;PSMC6;PSMD10;PSMD13;PSMD14;PSMD4;PSMD8;PSME1;SAMDB;SAT1;SCARB1;SG  
);GAPAM;GPAT2;GPCPD1;ID1;IMPA1;INPP5D;INPP5K;LCAT;LCAT1;LPCAT1;LPCAT2;LPCAT4;LPGAT1;MBOAT1;MTMR2;MTMR6;MTMR7;PGAP1;PGAP3;PI4K2B;PIGA;PIGB;PIGF;PIGK;PIGM;PIGS;PIGW;PIGY;PIGZ;PIK3C2A;PIK3CA;PIKFYVE;PLA2G4A;PLD2;PLD3;PLD4;PNPLA2;PNPLA8;PTEN;SACM1L;SAMDB;SE  
KD1;APBP2;ARF4;ARHGAP5;ARL2;ARL8B;ASNA1;ATAD1;ATAD2;ATAD2B;ATAD3A;ATL2;ATP10D;ATP11B;ATP11C;ATP13A2;ATP13A3;ATP2B1;ATP2C1;ATP5C1;ATP5E;ATP5F1;ATP5I;ATP5L;ATP5O;ATP6A1;ATP7A;ATP8A1;ATP8A2;ATP8B4;ATRX;BRIP1;BTAFA1;C10orf2;CCNH;CDK7;CENPE;CGN;CHD1;CHD5;  
KD1;APBP2;ARF4;ARHGAP5;ARL2;ARL8B;ASNA1;ATAD1;ATAD2;ATAD2B;ATAD3A;ATL2;ATP10D;ATP11B;ATP11C;ATP13A2;ATP13A3;ATP2B1;ATP2C1;ATP5C1;ATP5E;ATP5F1;ATP5I;ATP5L;ATP5O;ATP6A1;ATP7A;ATP8A1;ATP8A2;ATP8B4;ATRX;BRIP1;BTAFA1;C10orf2;CCNH;CDK7;CENPE;CGN;CHD1;CHD5;  
HRS9;DKK3;DLAT;FGFR4;GNMT;INSIG1;INSIG2;KMO;MID1IP1;MLYCD;NQO1;NR1H2;NR3C1;OXCT1;PDHX;PDK1;PDK2;PDP1;PDSS1;PRKAA1;PRKAB2;PRKAG2;PSMA1;PSMA2;PSMA3;PSMA4;PSMA6;PSMA8;PSMB1;PSMB3;PSMC1;PSMC2;PSMC3;PSMC5;PSMC6;PSMD10;PSMD13;PSMD14;PSMD4;PSMD8;F  
CCNL1;CCNT2;CCNY;CCNYL1;CCDC25C;CDC37;CDK5R1;CDK5RAP3;CKDN2C;CEP152;CEP250;CNPPD1;CRY1;DAB2IP;DIXD1;DLG1;DUSP19;EEF1A1;FBXO5;FER;FGFR1OP;F12;GLRX3;GSTP1;HDACS;HDAC7;HDAC9;HINT1;IBTK;IGBP1;ILK;ITGA9;JAK2;JUP;KAT2B;KIF11;LIPE;LLGL1;MAP3K1;MAP3K11;MAP3K13;  
SENP1;SOCS5;SUMO1;SUMO2;TAF9;TRIB2;UBE2V2;UCHL5;USP14;USP4;USP1

MSH2;MUC1;NBN;PSMA1;PSMA2;PSMA3;PSMA4;PSMA6;PSMA8;PSMB1;PSMB3;PSMC1;PSMC2;PSMC3;PSMC5;PSMC6;PSMD10;PSMD13;PSMD14;PSMD4;PSMD8;PSME1;RAD17;RBBP8;RFWD2;RINT1;RPS27L;TAOK1;TIPLR;TP63;TRIP1;UB  
AC2;PSMC3;PSMC5;PSMC6;PSMD10;PSMD13;PSMD14;PSMD4;PSMD8;PSME1;UBC;UBE2D1;UBE2E1;USP4  
AC2;PSMC3;PSMC5;PSMC6;PSMD10;PSMD13;PSMD14;PSMD4;PSMD8;PSME1;UBC;UBE2D1;UBE2E1;USP4  
D28;CDC25C;CDC26;CDC27;CDC7;CDK1;CDK2;CDK9;CDKN1B;CDT1;CHFR;CHMP1A;CHORDC1;CLRF3;CUL4B;DAPK3;DBF4;DDX3X;DGK2;DLG1;DNA2;E2F7;ECT2;ERCC2;EREG;FAM175A;FBXO31;FBXO5;FBXW7;HDAC8;HORMAD1;HSF1;KIF20B;KIF23;MAD2L1;MAPKAPK2;MCM5;MDM2;MSH2;MUC1;I

;LDLR;LPCAT1;LPCAT2;LPCAT4;MBOAT1;NQO1;PDE1B;PLA2G15;PLA2G4A;PNPLA6;PNPLA8;PSMA1;PSMA2;PSMA3;PSMA4;PSMA6;PSMA8;PSMB1;PSMB3;PSMC1;PSMC2;PSMC3;PSMC5;PSMC6;PSMD10;PSMD13;PSMD14;PSMD4;PSMD8;PSME1;SAMDB;SAT1;SCARB1;SG  
IQ;LCAT;LDLR;LPCAT1;LPCAT2;LPCAT4;MBOAT1;MTHFD2L;MTRR;NQO1;PDE1B;PHGDH;PLA2G15;PLA2G4A;PNPLA6;PNPLA8;PSMA1;PSMA2;PSMA3;PSMA4;PSMA6;PSMA8;PSMB1;PSMB3;PSMC1;PSMC2;PSMC3;PSMC5;PSMC6;PSMD10;PSMD13;PSMD14;PSMD4;PSMD8;PSME1;SAMDB;SAT1;SCARB1;SG  
);GAPAM;GPAT2;GPCPD1;ID1;IMPA1;INPP5D;INPP5K;LCAT;LCAT1;LPCAT1;LPCAT2;LPCAT4;LPGAT1;MBOAT1;MTMR2;MTMR6;MTMR7;PGAP1;PGAP3;PI4K2B;PIGA;PIGB;PIGF;PIGK;PIGM;PIGS;PIGW;PIGY;PIGZ;PIK3C2A;PIK3CA;PIKFYVE;PLA2G4A;PLD2;PLD3;PLD4;PNPLA2;PNPLA8;PTEN;SACM1L;SAMDB;SE  
KD1;APBP2;ARF4;ARHGAP5;ARL2;ARL8B;ASNA1;ATAD1;ATAD2;ATAD2B;ATAD3A;ATL2;ATP10D;ATP11B;ATP11C;ATP13A2;ATP13A3;ATP2B1;ATP2C1;ATP5C1;ATP5E;ATP5F1;ATP5I;ATP5L;ATP5O;ATP6A1;ATP7A;ATP8A1;ATP8A2;ATP8B4;ATRX;BRIP1;BTAFA1;C10orf2;CCNH;CDK7;CENPE;CGN;CHD1;CHD5;  
KD1;APBP2;ARF4;ARHGAP5;ARL2;ARL8B;ASNA1;ATAD1;ATAD2;ATAD2B;ATAD3A;ATL2;ATP10D;ATP11B;ATP11C;ATP13A2;ATP13A3;ATP2B1;ATP2C1;ATP5C1;ATP5E;ATP5F1;ATP5I;ATP5L;ATP5O;ATP6A1;ATP7A;ATP8A1;ATP8A2;ATP8B4;ATRX;BRIP1;BTAFA1;C10orf2;CCNH;CDK7;CENPE;CGN;CHD1;CHD5;  
HRS9;DKK3;DLAT;FGFR4;GNMT;INSIG1;INSIG2;KMO;MID1IP1;MLYCD;NQO1;NR1H2;NR3C1;OXCT1;PDHX;PDK1;PDK2;PDP1;PDSS1;PRKAA1;PRKAB2;PRKAG2;PSMA1;PSMA2;PSMA3;PSMA4;PSMA6;PSMA8;PSMB1;PSMB3;PSMC1;PSMC2;PSMC3;PSMC5;PSMC6;PSMD10;PSMD13;PSMD14;PSMD4;PSMD8;F  
CCNL1;CCNT2;CCNY;CCNYL1;CCDC25C;CDC37;CDK5R1;CDK5RAP3;CKDN2C;CEP152;CEP250;CNPPD1;CRY1;DAB2IP;DIXD1;DLG1;DUSP19;EEF1A1;FBXO5;FER;FGFR1OP;F12;GLRX3;GSTP1;HDACS;HDAC7;HDAC9;HINT1;IBTK;IGBP1;ILK;ITGA9;JAK2;JUP;KAT2B;KIF11;LIPE;LLGL1;MAP3K1;MAP3K11;MAP3K13;  
SENP1;SOCS5;SUMO1;SUMO2;TAF9;TRIB2;UBE2V2;UCHL5;USP14;USP4;USP1

MSH2;MUC1;NBN;PSMA1;PSMA2;PSMA3;PSMA4;PSMA6;PSMA8;PSMB1;PSMB3;PSMC1;PSMC2;PSMC3;PSMC5;PSMC6;PSMD10;PSMD13;PSMD14;PSMD4;PSMD8;PSME1;RAD17;RBBP8;RFWD2;RINT1;RPS27L;TAOK1;TIPLR;TP63;TRIP1;UB  
AC2;PSMC3;PSMC5;PSMC6;PSMD10;PSMD13;PSMD14;PSMD4;PSMD8;PSME1;UBC;UBE2D1;UBE2E1;USP4  
AC2;PSMC3;PSMC5;PSMC6;PSMD10;PSMD13;PSMD14;PSMD4;PSMD8;PSME1;UBC;UBE2D1;UBE2E1;USP4  
D28;CDC25C;CDC26;CDC27;CDC7;CDK1;CDK2;CDK9;CDKN1B;CDT1;CHFR;CHMP1A;CHORDC1;CLRF3;CUL4B;DAPK3;DBF4;DDX3X;DGK2;DLG1;DNA2;E2F7;ECT2;ERCC2;EREG;FAM175A;FBXO31;FBXO5;FBXW7;HDAC8;HORMAD1;HSF1;KIF20B;KIF23;MAD2L1;MAPKAPK2;MCM5;MDM2;MSH2;MUC1;I

;LDLR;LPCAT1;LPCAT2;LPCAT4;MBOAT1;NQO1;PDE1B;PLA2G15;PLA2G4A;PNPLA6;PNPLA8;PSMA1;PSMA2;PSMA3;PSMA4;PSMA6;PSMA8;PSMB1;PSMB3;PSMC1;PSMC2;PSMC3;PSMC5;PSMC6;PSMD10;PSMD13;PSMD14;PSMD4;PSMD8;PSME1;SAMDB;SAT1;SCARB1;SG  
IQ;LCAT;LDLR;LPCAT1;LPCAT2;LPCAT4;MBOAT1;MTHFD2L;MTRR;NQO1;PDE1B;PHGDH;PLA2G15;PLA2G4A;PNPLA6;PNPLA8;PSMA1;PSMA2;PSMA3;PSMA4;PSMA6;PSMA8;PSMB1;PSMB3;PSMC1;PSMC2;PSMC3;PSMC5;PSMC6;PSMD10;PSMD13;PSMD14;PSMD4;PSMD8;PSME1;SAMDB;SAT1;SCARB1;SG  
);GAPAM;GPAT2;GPCPD1;ID1;IMPA1;INPP5D;INPP5K;LCAT;LCAT1;LPCAT1;LPCAT

;GPS1;GPS2;GSTP1;HDAC3;IGBP1;IKBK;ITCH;JUN;KIAA1804;MAP2K2;MAP2K4;MAP3K11;MAP3K13;MAP3K2;MAP3K7;MAP4K1;MAP4K3;MAP4K5;MAPK8;MAPK8IP1;MAPK8IP2;MAPKAPK2;MAPKAPK3;MAPKBP1;MDFIC;MEF2A;MEF2C;MEN1;PKN1;PLCB1;PTGER4;PTPLAD1;RAP2A;RB1CC1;RBM4;RIPK2;J  
GATAD2A;LUC7L3;MEF2C;NOC3L;PHF5A;PLCB1;PLRG1;PNISR;PPIG;PPP1CC;PRPF18;PRPF31;PRPF40A;PRPF6;PSKH1;RBM11;RBM25;RBM27;RBM39;RBM4;RCHY1;RFWD2;RING1;SFB31;SLU7;SMNDC1;SRSF10;SRSF3;SUMO1;TOPORS;UZAF1;WBP  
C5;SMC6;SP3;SUMO1;TDG;TDP2;THAP1;TOPORS;TP53INP1;ZMYM;  
;NBN;PSMA1;PSMA2;PSMA3;PSMA4;PSMA6;PSMA8;PSMB1;PSMB3;PSMC1;PSMC2;PSMC3;PSMC5;PSMC6;PSMD10;PSMD13;PSMD14;PSMD4;PSMD8;PSME1;RAD17;RBBP8;RFWD2;RINT1;RPS27L;TAOK1;TIPLR;TP63;TRIP1;UB

MB1;PSMB3;PSMC1;PSMC2;PSMC3;PSMC5;PSMC6;PSMD10;PSMD13;PSMD14;PSMD4;PSMD8;PSME1;UBI  
MC1;PSMC2;PSMC3;PSMC5;PSMC6;PSMD10;PSMD13;PSMD14;PSMD4;PSMD8;PSME1;RFWD2;RRP8;TRIP1;UBI  
JCS5;SUMO1;SUMO2;TAF9;TRIB2;UBE2V2;USP44;USP;  
S2;MRPS22;MRPS28;MRPS31;MRPS33;RBM3;RPL11;RPL15;RPL17;RPL23;RPL26;RPL26L1;RPL27;RPL30;RPL31;RPL34;RPL35;RPL36A;RPL39;RPL39L;RPL41;RPL7;RPL9;RPS15A;RPS24;RPS27;RPS29;RPS3A;RPS7;ZCCHC:  
;HAUS7;KIAA0101;KIF11;NDE1;PKD2;PLK4;PPP1R12A;SASS6;TUBE1;XPO1  
B4A;SEC62;SNX2;TIMM17A;TIMM22;TIMM23;TNPO1;TOMM20;TOMM40;TOMM5;TNSAX;USO1;VPS26A;XPO1;ZFYVE11  
IAUS6;HAUS7;KIAA0101;KIF11;NDE1;PKD2;PLK4;PPP1R12A;SASS6;TUBE1;XPO1  
IP;LEPREL4;LIG4;MAD2L1;MKI67P;MLF1P;NDE1;NOL6;NSL1;NSMCE2;NUDCD2;NUF2;NUP37;NUP85;ORC2;PES1;PMF1;PPP1CC;RANGAP1;RGS12;RRS1;SEPT7;SGOL2;SKA2;SMARCA5;SMC2;SMC4;SMC5;SMC6;SPAG5;SS18L1;SUV39H1;SYCP2;SYN1;TUBG1;WAPAL;ZWILCI  
ATP5E;ATP5F1;ATP5I;ATP5L;ATP5O;BMF;BNIP3L;C14orf2;CASP8;CCDC90A;CHCHD4;CISD1;CISD2;CNP;COASY;COQ10B;COQ2;COX16;COX6C;COX7A2;COX7A2L;COX7B;COX7C;CRAT;CRLS1;CYCS;DDX3X;DHFRL1;DHRS1;DMPK;ERAL1;GK;GPAM;GPAT2;GPD2;GRPEL2;GUF1;HIGD1A;HMGCL;HSD17B10;IDH2;IN  
PSMC1;PSMC2;PSMC3;PSMC5;PSMC6;PSMD10;PSMD13;PSMD14;PSMD4;PSMD8;PSME1;SAR1B;SEC13;SEC23A;SEC24A;SEC61A1;TAPBP1;UBC;UBE2J

;GPS1;GPS2;GSTP1;HDAC3;IGBP1;IKBK;ITCH;JUN;KIAA1804;MAP2K2;MAP2K4;MAP3K11;MAP3K13;MAP3K2;MAP3K7;MAP4K1;MAP4K3;MAP4K5;MAPK8;MAPK8IP1;MAPK8IP2;MAPKAPK2;MAPKAPK3;MAPKBP1;MDFIC;MEF2A;MEF2C;MEN1;PKN1;PLCB1;PTGER4;PTPLAD1;RAP2A;RB1CC1;RBM4;RIPK2;J  
ARPC4;ATL2;ATPAF2;AURKC;BAG4;BBS10;BBS12;BCLAF1;BMF;C10orf2;CAPG;CAPZA1;CAPZA2;CASP8;CBR4;CCDC103;CCDC39;CCT2;CCT6B;CD2AP;CDC42EP2;CDK1;CDKN1B;CENPE;CENPW;CEP57;CHAF1A;CHAF1B;CLIP3;COG4;CORO1A;CPSF6;CRBN;CRTC2;CSNK2B;CUTC;CYBA;DDX3X;DECR1;DHPS;DLG1;I

P1L;GRIKS;INSIG1;LRMP;LYST;PIK3C2A;PRKCI;RSG1;SAR1B;SEC13;SEC23A;SEC24A;STX5;SYP;TMED10;TMED2;USO1;VAMP7;VPS33B;WASL;ZFYVE1  
I9;USP21;USP25;USP37;USP44;USP46;USP5;USP6;YOD1;ZNRANB1  
A5;MID1P1;MTRF1;PLEKHH2;RDX;SPTBN2;SPTBN5;TRPV4;TWF1;TWF2;UPF1  
PDP1;PPF1;PPM1B;PPM1G;PPP1CA;PPP1CB;PPP1CC;PPP1R12A;PPP2CB;PPP2R1A;PPP2R2A;PPP2R3A;PPP2R4;PPP2R5A;PPPC3A;PPP3CB;PPPS5;PPPC6;PTEN;PTP4A1;PTPN12;PTPN2;PTPN22;PTPN4;PTPN7;PTPRO;RPAP2;RPRD1A;SMEK1;SMEK2;SMPD1;SSU72;SYMPI  
IPL27;RPL30;RPL31;RPL34;RPL35;RPL36A;RPL39;RPL39L;RPL41;RPL7;RPL9;ZCCHC1  
L47;MRPL48;MRPS10;MRPS17;MRPS18B;MRPS18C;MRPS22;MRPS31;MRPS33;RPL11;RPL15;RPL17;RPL21;RPL23;RPL26;RPL26L1;RPL27;RPL30;RPL31;RPL34;RPL35;RPL36A;RPL36AL;RPL39;RPL39L;RPL41;RPL7;RPL9;RPS15A;RPS24;RPS27;RPS27L;RPS29;RPS3A;RP  
I4;ACVRL1;ADAM10;ADAM15;ADRM1;AEBP2;AGAP2;AGER;AHR;AIM2;AKIP1;AKT1;AKTIP;ALCAM;ALDOA;ANAPC10;ANG;ANGPT1;ANGPTL4;ANLN;ANXA1;AP1AR;AP1B1;AP1S2;AP2A2;APC;APPL1;AQIP11;ARFGAP1;ARFGF2;ARHGAP10;ARHGAP42;ARHGAP5;ARHGAD1A;ARHGDF2;ARID2;ARID5A;ARL2;ARPC  
IAPKAPK3;MEF2A;MEF2C;NFKB2;NFKBIB;PELI1;RIPK2;RPS6KA3;RPS6KA5;TAB1;TAB2;TAB3;TBK1;TICAM1;TLR6;UBC;UBE2N  
ARPC4;ATL2;ATPAF2;AURKC;BAG4;BBS10;BBS12;BCLAF1;BMF;C10orf2;CAPG;CAPZA1;CAPZA2;CASP8;CBR4;CCDC103;CCDC39;CCT2;CCT6B;CD2AP;CDC42EP2;CDK1;CDKN1B;CENPE;CENPW;CEP57;CHAF1A;CHAF1B;CLIP3;COG4;CORO1A;CPSF6;CRBN;CRTC2;CSNK2B;CUTC;CYBA;DDX3X;DECR1;DHPS;DLG1;I  
K2;PEX1;PEX11A;PEX11G;PEX12;PEX13;PEX14;PEX2;PEX3;PNPLA8;RAB8B;SCP  
K2;PEX1;PEX11A;PEX11G;PEX12;PEX13;PEX14;PEX2;PEX3;PNPLA8;RAB8B;SCP

14;RAB31P;RAB9B;SCAMP1;SCAMP3;SCFD1;SLC30A6;STEAP2;STX4;STX7;VAMP4;VAMP7;VPS13/  
I83;PSMC1;PSMC2;PSMC3;PSMC5;PSMC6;PSMD10;PSMD13;PSMD14;PSMD4;PSMD8;PSME1;SCARB

4MT2;TK1;TP63;USP16  
;PAPD4;PEX2;POLR2E;POLR3D;POLR3G;POLR3H;RECQL5;RPAP2;RPRD1A;SHFM1;TAF12;TAF13;TAF2;TAF5;TAF7;TAF9;TAF9B;TBPL  
SMA2;PSMA3;PSMA4;PSMA6;PSMA8;PSMB1;PSMB3;PSMC1;PSMC2;PSMC3;PSMC5;PSMC6;PSMD10;PSMD13;PSMD14;PSMD4;PSMD8;PSME1;RFWD2;RPS27L;RRP8;SIRT1;SMYD2;TFAP4;TP63;TRIP1;UB  
SMC5;PSMC6;PSMD10;PSMD13;PSMD14;PSMD4;PSMD8;PSME:  
7;EEF1A1;EEFSEC;EIF5;ERALL1;FPGT;GBP3;GBP6;GCH1;GFM2;GIMAP2;GIMAP7;GMPPA;GNA13;GNAI1;GNAO1;GNL1;GNL3;GTPBP10;GTPBP2;GTPBP8;GUCY2C;GUF1;HBS1L;KRAS;LRRK2;MFN1;MMAA;NIN;NKIRAS1;NRAS;NUDT16;OLA1;OPA1;PCK2;RAB10;RAB11B;RAB12;RAB14;RAB18;RAB18B;RAB22A;RAI  
4;PSMA6;PSMC2;PSMC3;UPF1;XRN1  
44;CEP95;CKAP2;DDX11;ECT2;ERCC2;FAM110A;FBXO5;HAUS1;HAUS3;HAUS6;HAUS7;HDAC3;KATNB1;KIAA1009;KIF11;KIF18A;KIF20B;KIF22;KIF23;KIF2A;KIF3A;KIFC1;MAD2L1;MAP2K5;MAP9;MZT1;NDE1;NEK7;NUDCD2;NUP85;PIN4;PKD2;PPP2CB;PTP4A1;RANGAP1;RASSF1;RB1;RIF1;SEPT7;SKA2;SPAG5

;PIWIL4;PNRC2;PQB1;PSMA2;PSMA4;PSMA6;PSMC2;PSMC3;PUM2;RBM4;TDRD6;TIA1;UHMK1;UPF1;XRN:  
L2;IDE;IDI1;IMPDH2;MAP2K2;MFF;MLYCD;MPV17;NUDT12;PEX1;PEX11A;PEX11G;PEX12;PEX13;PEX14;PEX2;PEX3;PNPLA8;PXT1;RAB8B;SCP2;TMEM135;ZADH:  
L2;IDE;IDI1;IMPDH2;MAP2K2;MFF;MLYCD;MPV17;NUDT12;PEX1;PEX11A;PEX11G;PEX12;PEX13;PEX14;PEX2;PEX3;PNPLA8;PXT1;RAB8B;SCP2;TMEM135;ZADH:

1;TMX3;TXNDC12;TXNDC17;TXNL1;TXNRD:  
;APPL1;ARHGFE2;ARPP19;ARRB1;ATF2;ATP6V1G1;BCR;BIN1;BLZF1;BORA;BRCA2;C10orf2;C14orf166;CAB39;CARHSP1;CASP8;CBX3;CCDC88A;CCNA2;CCNC;CCND3;CCNE2;CCNH;CCNL1;CCNT2;CCNY;CCNYL1;CD28;CDC25C;CDC27;CDC37;CDC42EP2;CDC73;CDK5R1;CDK5RAP3;CDKN1B;CDKN2C;CEP152;CEP  
3;ARRB1;ATF1;ATF2;ATRX;BACH1;BANF1;BAZ2B;BBX;BCLAF1;BDP1;BLZF1;BMI1;BRCA2;BRIP1;BTAF1;C10orf2;CARHSP1;CASP8AP2;CBFB;CC2D1A;CDK9;CDT1;CEBPA;CEBPB;CEBP2;CENPW;CERS5;CGGBP1;CHD1;CHDS;CHD9;CNBP;CREB1;CREB5;CREBL2;CREBZF;CRY1;CXXC1;DACH1;DBP;DDB2;DDX11;DDX3  
UVBL2;SIRT1;SUZ12;TAF7;TAF9;WDR5  
;PEX2;POLR2E;RECQL5;RPAP2;RPRD1A;SHFM1;TAF12;TAF13;TAF2;TAF5;TAF7;TAF9;TAF9B;TBPL

ENPQ;CENPW;CHMP1A;CREB1;CSNK1A1;DAPK3;DAXX;DCTN2;DDX11;DMAP1;DYNLT3;EED;EHMT2;EIF3E;ESCO1;ESCO2;FAM60A;FER;GABPA;GTPBP10;H2AFV;H2AF2;HDAC8;HELLS;HIRA;HMGB1;HMGB2;HMGN5;HORMAD1;INO80C;ITGB3BP;JUN;KAT2B;KAT8;KIF22;KLHDC3;LEPREL4;LIG4;LRWD1;MAD2L  
;PEX2;POLR2E;POLR3D;POLR3G;POLR3H;RECQL5;RPAP2;RPRD1A;SHFM1;TAF12;TAF13;TAF2;TAF5;TAF7;TAF9;TAF9B;TBPL  
;PEX2;POLR2E;POLR3D;POLR3G;POLR3H;RECQL5;RPAP2;RPRD1A;SHFM1;TAF12;TAF13;TAF2;TAF5;TAF7;TAF9;TAF9B;TBPL  
I;USP37;USP38;USP44;USP45;USP46;USP5;USP51;USP6;USPL1;ZNRANB1  
7;EEF1A1;EEFSEC;EIF5;ERALL1;FPGT;GBP3;GBP6;GCH1;GFM2;GIMAP2;GIMAP7;GMPPA;GNA13;GNAI1;GNAO1;GNL1;GNL3;GTPBP10;GTPBP2;GTPBP8;GUCY2C;GUF1;HBS1L;KRAS;LRRK2;MFN1;MMAA;NIN;NKIRAS1;NRAS;NUDT16;OLA1;OPA1;PCK2;PRPS2;RAB10;RAB11B;RAB12;RAB14;RAB18;RAB18B;RAB2  
7;EEF1A1;EEFSEC;EIF5;ERALL1;FPGT;GBP3;GBP6;GCH1;GFM2;GIMAP2;GIMAP7;GMPPA;GNA13;GNAI1;GNAO1;GNL1;GNL3;GTPBP10;GTPBP2;GTPBP8;GUCY2C;GUF1;HBS1L;KRAS;LRRK2;MFN1;MMAA;NIN;NKIRAS1;NRAS;NUDT16;OLA1;OPA1;PCK2;PRPS2;RAB10;RAB11B;RAB12;RAB14;RAB18;RAB18B;RAB2  
4YSM1;OTUD5;PIGK;SEN1P;SEN6;SEN7P;UCLH3;UCLH5;USP1;USP12;USP14;USP15;USP16;USP19;USP21;USP25;USP31;USP37;USP38;USP44;USP45;USP46;USP5;USP51;USP6;USPL1;VCP1P1;YOD1;ZNRANB1

;CCDC90A;CNP;COQ10B;COX6C;COX7A2;COX7A2L;COX7B;COX7C;CRAT;CRLS1;CYCS;DHFRL1;DHRS1;ERAL1;GPAM;GPD2;GRPEL2;GUF1;HIGD1A;HMGCL;HSD17B10;IDH2;IMMP1L;KMO;L2HGDH;MCU;MDH2;MPV17;MTHFD2L;NDUFA4;NDUFA5;NDUFA6;NDUFA8;NDUFB1;NDUFB3;NDUFB5;NDL

APK6;MAPK8;NLK;PPP4C;RIPK3;STK10;TGFBF2

X5;TMED10;TMED2;TMED5;TMED7;UGGT2;VMA21;VMP;  
UVBL2;SIRT1;SUZ12;TAF7;TAF9;WDR5  
ABCD2;ABCD3;ABCE1;ABHD10;ABHD12;ABHD13;ABHD14B;ABHD3;ABI1;ABI2;ABI3;ABLIM2;ABR;ACAD10;ACAD9;ACADM;ACADS8;ACADVL;ACAT1;ACAT2;ACBD3;ACBD5;ACBD6;ACD;ACOT13;ACOT7;ACP2;ACPL2;ACSF2;ACSF3;ACSL4;ACSL6;ACSS1;ACTL6A;ACTL9;ACTN4;ACTR1A;ACTR6;ACVR1C;ACVR2A;AI  
5L1;SLC9A6;SNX13;SNX16;SNX2;SNX4;SNX8;STAM2;STX7;TMEM184A;VAC14;ZFYVE1

APK;L2HGDH;LRRK2;MFF;NDUFA1;NDUFA4;NDUFA5;NDUFA6;NDUFAF1;NDUFB1;NDUFB3;NDUFB5;NDUFS2;NDUFS4;NDUFS5;OPA1;PIIF;RHOT1;SDHD;SLC24A6;TIMM17A;TIMM23;TMEM70;TOMM20;TOMM40;TOMM5;UQCRB;UQCRC1;UQCRC2;UQCRI  
;RCC1  
DRA;INSIG1;INSIG2;MARCH6;PGAP1;PGAP3;PIGB;PIGK;PIGS;PIGZ;PKD2;PORCN;SACM1L;SAMD8;SEC61A1;SERAC1;SSR3;TECR;TMEM66;WFS:

Q1;KIFC1;LDLR;LLGL1;LRP6;MAP2K2;MARCH1;MTMR2;NIPA1;PIKFYVE;PRDX3;PTP4A1;RAB14;RAB22A;RAB5A;RABEP1;RNF11;SH3GL1;SHAH1;SLC9A6;SNX13;SNX16;SNX17;SNX2;SNX3;SNX4;SNX8;STAM2;STEAP2;STX7;TMEM184A;TOM1;TRIM3;VAC14;VPS18;VPS48;WDFY1;ZFYVE1  
TAD1;ATAD2;ATP10D;ATP11B;ATP11C;ATP13A2;ATP13A3;ATP2B1;ATP2C1;ATP5C1;ATP5E;ATP5F1;ATP5I;ATP5L;ATP5O;ATP6AP1;ATP7A;ATP8A1;ATP8A2;ATP8B4;BRIP1;CCNH;CDK7;CHD1;CHD5;CRBN;DDX11;DDX3X;DDX41;DDX50;DDX54;DDX59;DHX30;DHX36;DHX40;DICER1;DNA2;DNAH6;ERCC2;FANC  
DA1;TAF12;TAF2;TAF5;TAF7;TAF9;TAF9B;WDR5;ZZZ:  
DNAJC24;DNAJC25;DNAJC27;ERO1L8;GRPEL2;HSP61;LMAN1;LRPAP1;MKKS;NDUFAF1;PFDN4;PFDN5;PPIB;RP2;RUVBL2;SCAP;SERPINH1;SIL1;SLMAP;SRSF10;TBCA;TOMM20;TOR1A;TRAP1;VBP1  
ABCD2;ABCD3;ABCE1;ABCF3;ABHD10;ABHD12;ABHD13;ABHD14B;ABHD3;ABI1;ABI2;ABI3;ABLIM2;ABR;ACAD10;ACAD9;ACADM;ACADS8;ACADVL;ACAP1;ACAP2;ACAT1;ACAT2;ACBD3;ACBD5;ACBD6;ACD;ACOT13;ACOT7;ACP2;ACPL2;ACSF2;ACSF3;ACSL4;ACSL6;ACSS1;ACTL6A;ACTN4;ACTR1A;ACTR6;ACVR1C;AC  
IB1;LRCC1;MZT1;NEK1;NIN;PAX2;PLK4;POC1B;ROCK1;SASS6;TNKS2;TOPORS;TUBD1;TUBE1;TUBG1;TUBG:  
LG1;DUSP11;DUSP19;G6PC3;GDPD3;GDPD5;GPCPD1;IMPA1;IMPAD1;INPP5D;INPP5K;LHPP;MINPP1;MTMR2;MTMR6;MTMR7;MTMR9;NANP;NAPEPLD;NT5C3;NUDT16;PDE1B;PDE3B;PDE4A;PDE4D;PDE7A;PDP1;PGAM5;PGAP1;PIKFYVE;PLCB1;PLCB2;PLCB3;PLCD3;PLCL1;PLCXD2;PLD2;PLD3;PLD4;PPEF1;I

IRPS18B;MRPS18C;MRPS22;MRPS28;MRPS31;MRPS3  
IRPS18B;MRPS18C;MRPS22;MRPS28;MRPS31;MRPS3  
7;RPL9;ZCCHC1

IV2L2;SLU7;SNRPB;SNRPB2;SNRPD1;SNRPE;SNRPG;U2AF1;XAB2;ZCCHC  
A2;GAA;HLA-DMA;HLA-DPB1;HLA-DRA;LMBRD1;MARCH1;MCOLN1;MFSD8;OSTM1;PNPLA7;PQLC2;PSEN2;RAB12;RNF13;SLC17A5;SLC29A3;TLR8;TMEM106B;TMEM55A;TRIM23;VAMP7;VPS18;VPS33B;ZNR  
F1

19;FGFR1OP;GAS6;GMFB;HMGB1;IBTK;KAT2B;MAP2K2;MAPK8IP1;MAPK8IP2;MBIP;PIK3CA;PKIA;PKIB;PRKAG2;PRKAR1A;PRKAR1B;SPA17;STRADA;TRIB2  
19;FGFR1OP;GAS6;GMFB;GSTP1;HMGB1;IBTK;KAT2B;LRP6;MALT1;MAP2K2;MAPK8IP1;MAPK8IP2;MBIP;PIK3CA;PKIA;PKIB;PRKAG2;PRKAR1A;PRKAR1B;SPA17;STRADA;TAB1;TRIB2;VAC14

ERBB2IP;ERN1;FAM169A;FAM188A;GCH1;IL4I1;INTS2;LEMD3;LMNB2;MATR3;MIB1;MRPL19;NEK1;NOC4L;NRM;NUCB2;NUP54;NUP85;PARP16;PLCB1;PNPLA7;PSEN2;PTCHD2;PTGDS;RAE1;RANGAP1;RECQL5;RNF13;SIRT1;SUMO1;TMEM201;TMEM38B;TMEM48;TMPO;TOR1A;TSGA10;UNC50;WTA  
T1;CERS5;CST3;CTDNEP1;CYHR1;DMPK;DTX2;EIF5A2;ERBB2IP;ERN1;FAM169A;FAM188A;FANCL;GCH1;GMCL1;IL4I1;INTS2;IPO11;IPO13;IPO4;KPNAB3;LEMD3;LMNA;LMNB2;MAD2L1;MATR3;MIB1;MRPL19;MTMR6;NEK1;NOC4L;NRM;NUCB2;NUP37;NUP54;NUP62CL;NUP85;PARP16;PLCB1;PNPLA7;PRKCZ

PITPNM1;PKN1;PKN2;PPP1CC;RALA;SEPT7;SPAST;TOPORS;TXNDC9;VPS37B;VPS44  
4GALT3;B4GALT6;C1GALT1;CHPF;CHPF2;CHSY1;CSGALNACT1;CSGALNACT2;DDOST;DPM1;EXTL2;FUT4;GALNT1;GALNT3;GALNT4;GALNT7;GCNT1;GCNT2;GCNT4;LFNG;MGAT1;MGAT2;MGAT4A;OSTC;PIGA;PIGB;PIGM;PIGZ;PLOD3;POGLUT1;POMT2;RFNG;STT3B;TYMP;UGCG;UGGT2;UGT2B1  
E1;BAP1;BRCC3;C11orf54;CDC14A;CDC25C;CDKN3;CES4A;CNOT6;CNOT6L;CNOT7;CNP;CTDNEP1;CTDSP1;CTDSP2;CYCS;DAGLB;DAPP1;DCP2;DICER1;DIS3;DIS3L2;DLG1;DNA2;DNASE1L1;DNASE2;DUSP11;DUSP19;ELAC2;ENDOG;ENDOV;ERI1;ERI2;ERN1;FANCM;G6PC3;GDPD3;GDPD5;GEN1;GPCPD1;HRSP  
1B;PTPN23;RAB3IP;RPGR;RSG1;TOPORS;WDR3!  
V7;CLN3;CLN5;CTNS;CYBASC3;DIRC2;DRAM2;GAA;HLA-DMA;HLA-DPB1;HLA-DRA;HOOK1;HOOK2;LMBRD1;MARCH1;MCOLN1;MFSD8;MTMR2;OSTM1;PNPLA7;PQLC2;PSEN2;RAB12;RNF13;SLC17A5;SLC29A3;TLR8;TMEM106B;TMEM55A;TRIM23;VAMP7;VMP1;VPS18;VPS33B;VPS48;ZNR

37;NUP85;ORC2;PMF1;PPP1CC;RANGAP1;SEPT7;SGOL2;SKA2;SPAG5;SS18L1;ZWILCH  
;NUP37;NUP85;ORC2;PMF1;PPP1CC;RANGAP1;SEPT7;SGOL2;SKA2;SPAG5;SS18L1;ZWILCH

ATMR7;PDP1;PGAM5;PPEF1;PPM1B;PPM1G;PPP1CA;PPP1CB;PPP1CC;PPP1R15B;PPP1R3D;PPP2CB;PPP2R1A;PPP2R2A;PPP3CA;PPP3CB;PPP4C;PPP5C;PPP6C;PTEN;PTP4A1;PTPDC1;PTPN12;PTPN2;PTPN22;PTPN23;PTPN4;PTPN7;PTPRO;RNGTT;RPAP2;SSU72;TENC1;UBLCP1

KMO;MARCH5;MCL1;MFF;MFN1;MSTO1;MTX2;MTX3;OPA1;PGAM5;PMAIP1;PPP1CC;RHOT1;RPS6KB1;TMEM173;TOMM20;TOMM40;TOMM  
LNT1;GALNT3;GOLPH3L;HACE1;LLGL1;LPCAT2;MGAT2;NAGPA;NCS1;PITPNM1;RAB14;RAB27B;SAR1B;SCFD1;SGMS1;TMBIM4;TMED2;VCIPI1;VRK1

I;EML2;ERCC2;GOPC;GRIP1;IFT52;ITGB3BP;JAK2;KPNAB3;LIG4;MID1IP1;MLLT4;MSH2;PEX1;PEX2;PFKM;PLEKHB1;PPP2CB;PRDX3;PRKAA1;SCLT1;SHAH1;SIRT1;SLC9A3R2;SNX17;TAF13;TRIM3;VPS4A;VPS4B;XRCC

RAD51B;RAD51C;RECQL1;RFC3;RUVBL2;SMARCA1;TOP1MT

EB1;CRTC2;CTBP1;DDX54;DMAP1;DR1;DRAP1;DYRK1B;E2F6;E2F7;EID1;ELK4;ENY2;ESR2;FOXH1;GABPA;GMNN;GPS2;GRIP1;HCFC2;HDAC3;HDACS;HDAC7;HDAC9;HIRA;HSF2;HSF4;JMY;JUN;JUP;KAT2B;MED12L;MED13;MED14;MED15;MED16;MED21;MED22;MED23;MED26;MED4;MED7;MED8;MED9;MI

/39H2;SUZ12;TRIM28;UBE2A

KAG2;TRIB2

IP3K14;MAP3K2;MAP3K7;MAP3K8;MAP4K1;MAPK6;MAPK8;NLK;NSMAF;PPP4C;RGS12;RIPK3;SMAD2;SMAD4;SMAD5;STK10;TGFBFR;  
SRM  
GAP10;ARHGAP11A;ARHGAP12;ARHGAP22;ARHGAP42;ARHGAP5;ARHGDI1;ARRB1;ASAP3;AZIN1;BCR;BNIP2;CAB39;CARD8;CASP8AP2;CDC42EP2;CDK5R1;CDKN1B;CHM;CHML;CHN2;CTSH;DAB2IP;DBF4;DEPDC1;DEPDC1B;DNAJC10;DUSP19;EBAG9;ECT2;ELMOD2;FAM13B;FRS2;GAS6;GDI1;GIT1;GMFB;GI  
;CSNK1A1;DAPK3;DAXX;DCTN2;DDX11;DMAP1;DYNLT3;EED;EIF3E;ESCO1;ESCO2;FAM60A;FER;GABPA;H2AFV;H2AF2;HELLS;HIRA;HMGN5;INO80C;ITGB3BP;JUN;KAT2B;KAT8;KIF22;KLHDC3;LEPREL4;LRWD1;MAD2L1;MAF;MEF2A;MEN1;MIS18BP1;MLF1IP;MMS22L;MUC1;NBN;NDE1;NEDD4;NFATC1;NSL1

11A;ARHGAP12;ARHGAP22;ARHGAP42;ARHGAP5;ARHGDI1;ARHGEF10L;ARHGEF2;ARL2;ARRB1;ASAP3;BCR;BNIP2;CDC42EP2;CHM;CHML;CHN2;CYTH2;DAB2IP;DENND1B;DENND1C;DENND4A;DENND4C;DEPDC1;DEPDC1B;DIS3;DOCK11;ECT2;ECT2L;EIF2B5;ELMOD2;FAM13B;FBXO8;FGD2;FGD3;FGD4;FN  
;TRIB2

;G6PC3;IMPA1;IMPAD1;INPP5D;INPP5K;LHPP;MINPP1;MTMR2;MTMR6;MTMR7;MTMR9;NANP;NT5C3;NUDT16;PDP1;PGAM5;PIKFYVE;PPEF1;PPM1B;PPM1G;PPP1CA;PPP1CB;PPP1CC;PPP1R15B;PPP1R3D;PPP2CB;PPP2R1A;PPP2R2A;PPP3CA;PPP3CB;PPP4C;PPP5C;PPP6C;PTEN;PTP4A1;PTPDC1;PTPN12;  
;CBR4;CTBP1;DBI;DECR1;DHRF1;ERO1L;ERO1LB;ETFA;FMO5;GALE;GAPDH;GCH1;GRHRP;HMGLC;HPGD;IDH2;IDH3B;IDH3G;KMO;MICAL1;MTO1;MTRR;NDUFS2;NOS3;PHGDH;QDPR;SCP2;SIRT1;SIRT2;SPR;SUOX;TGDS;TXNRD2;UGDI  
5AP12;ARHGAP22;ARHGAP42;ARHGAP5;ARHGDI1;ARRB1;ASAP3;BCR;BNIP2;CDC42EP2;CHM;CHML;CHN2;DAB2IP;DEPDC1;DEPDC1B;ECT2;ELMOD2;FAM13B;GDI1;GIT1;JUN;LLGL1;LRRK2;PLCB1;PLXNB2;PTPLAD1;RAB3GAP2;RABEP1;RANGAP1;RASA1;RGS1;RGS12;RGS18;RGS5;RIN1;RP2;SH3BP1;SIPA1;SY  
4A;SEPT7;SPAG16;UHMK1;WDRPC;WDR35  
ABHD12;ABHD13;ABHD14B;ABHD3;ACAD10;ACOT13;ACOT7;ACP2;ACPL2;ACY3;ADA;ADAM10;ADAM15;ADAM22;ADAMT55;ADAMT56;ADORA1;AEBP1;AGAP3;AGBL3;AGL;AKD1;AKR7A2;ANG;APEH;APEX1;APEX2;APH1A;APLF;APOBEC3D;APBP2;APT;ARF4;ARG2;ARHGAP5;ARL2;ARL8B;ARSA;ARSK;ASN

11A;ARHGAP12;ARHGAP22;ARHGAP42;ARHGAP5;ARHGDI1;ARHGEF10L;ARHGEF2;ARL2;ARRB1;ASAP3;BCR;BNIP2;CDC42EP2;CHM;CHML;CHN2;CYTH2;DAB2IP;DENND1B;DENND1C;DENND4A;DENND4C;DEPDC1;DEPDC1B;DIS3;DNAJC10;DOCK11;ECT2;ECT2L;EIF2B5;ELMOD2;FAM13B;FBXO8;FGD2;FGD3  
JBP1;NUBPL;PPAT;REV3L  
JBP1;NUBPL;PPAT;REV3L  
NSIG2;MARCH6;PIGK;PIGS;PKD2;PORCN;SACM1L;SAMD8;SEC61A1;SSR3;TECR;TMEM66;WFS1  
IGCS1;ING3;KAT2B;KAT8;LCAT;LCLAT1;LPCAT1;LPCAT2;LPCAT4;LPGAT1;MBOAT1;MCAT;MGEA5;NAA16;NAA20;NAA30;NAA50;NAA60;NAT1;OXSM;PDHX;PIGW;PLA2G15;PORCN;SAT1;SCP2;SLC27A3;SPTLC1;SPTSSA;TADA1;TAF12;TAF5;TAF9;TGM4;WDR5;YKT6;ZDHHC13;ZDHHC14;ZDHHC16;ZDHHC17;ZC  
T3;GOLPH3L;HACE1;LLGL1;NAGPA;NCS1;PITPNM1;RYR1;SAR1B;SCFD1;SGMS1;TMED2

33GNT5;B4GALT3;B4GALT6;C1GALT1;CHPF;CHPF2;CHSY1;CSGALNACT1;CSGALNACT2;DDOST;DPM1;EXTL2;FUT4;GALNT1;GALNT3;GALNT4;GALNT7;GCNT1;GCNT2;GCNT4;GLT8D1;GLT8D2;GTDC1;GXLYT1;HPRT1;LFNG;MGAT1;MGAT2;MGAT4A;NAMPT;OSTC;PARP11;PARP16;PARP8;PIGA;PIGB;PIGM;PIGZ  
GTF2IRD2B;HIST1H2BC;HIST1H2BD;HIST2H2BF;HKR1;LDHB;LIAS;MEAF6;METTL3;NAP1L4;NPR2;PCID2;PDE6B;PMS2P1;POLR1C;PPIE;PIIH;PRPSAP2;RBFA;RPP38;RSAD1;SIRT5;SUPT7L;TCEA3;TGF83;WDR77;ZNF133;ZNF202;ZNF211;ZNF232;ZNF266;ZNF329;ZNF343;ZNF419;ZNF44;ZNF530;ZNF542;ZNF544;  
2IRD2;GTF2IRD2B;HIST1H2BC;HIST1H2BD;HIST2H2BF;HKR1;LDHB;LIAS;MEAF6;METTL3;NAP1L4;NPR2;PCID2;PDE6B;PMS2P1;POLR1C;PPIE;PIIH;PRPSAP2;RBFA;RPP38;RSAD1;SIRT5;SUPT7L;TCEA3;TGF83;WDR77;ZNF133;ZNF202;ZNF211;ZNF232;ZNF266;ZNF329;ZNF343;ZNF419;ZNF44;ZNF530;ZNF542;ZNF544;  
GTF2IRD2B;HIST1H2BC;HIST1H2BD;HIST2H2BF;HKR1;HSD17B7;LDHB;LIAS;MEAF6;METTL3;NAP1L4;NPR2;PCID2;PDE6B;PMS2P1;POLR1C;PPIE;PIIH;PRPSAP2;RBFA;RPP38;RSAD1;SIRT5;SUPT7L;TCEA3;TGF83;WDR77;ZNF133;ZNF202;ZNF211;ZNF232;ZNF266;ZNF329;ZNF343;ZNF419;ZNF44;ZNF530;ZNF542;ZNF544;ZNF563;ZNF671;ZNF69;ZNF773;ZNF78  
2B;HIST1H2BC;HIST1H2BD;HIST2H2BF;HKR1;LDHB;MEAF6;METTL3;NAP1L4;NPR2;PCID2;PDE6B;PMS2P1;POLR1C;PPIE;PIIH;PRPSAP2;RBFA;RPP38;RSAD1;SIRT5;SUPT7L;TCEA3;TGF83;WDR77;ZNF133;ZNF202;ZNF211;ZNF232;ZNF266;ZNF329;ZNF343;ZNF419;ZNF44;ZNF530;ZNF542;ZNF544;ZNF563;ZNF671;ZNF69;ZNF773;ZNF78  
1RD2;GTF2IRD2B;HIST1H2BC;HIST1H2BD;HIST2H2BF;HKR1;LDHB;MEAF6;METTL3;NAP1L4;NPR2;OVGP1;PCID2;PDE6B;PMS2P1;POLR1C;PPIE;PIIH;RBFA;RPP38;SIRT5;SUPT7L;TCEA3;TGF83;WDR77;ZNF133;ZNF202;ZNF211;ZNF232;ZNF266;ZNF329;ZNF343;ZNF419;ZNF44;ZNF530;ZNF542;ZNF544;ZNF563;ZNF671;ZNF69;ZNF773;ZNF78  
2B;HIST1H2BC;HIST1H2BD;HIST2H2BF;HKR1;LDHB;MEAF6;METTL3;NAP1L4;NPR2;PCID2;PDE6B;PMS2P1;POLR1C;PPIE;PIIH;PRPSAP2;RBFA;RPP38;RSAD1;SIRT5;SUPT7L;TCEA3;TGF83;WDR77;ZNF133;ZNF202;ZNF211;ZNF232;ZNF266;ZNF329;ZNF343;ZNF419;ZNF44;ZNF530;ZNF542;ZNF544;ZNF563;ZNF671;ZNF69;ZNF773;ZNF78

329;ZNF343;ZNF419;ZNF44;ZNF530;ZNF542;ZNF544;ZNF563;ZNF671;ZNF69;ZNF773;ZNF78  
;COQ6;DNAH3;DSN1;DUSP6;EXOSC2;EXOSC7;FANCE;FGR;GALNT12;GEMIN8;GPD1;GTF2IRD2;GTF2IRD2B;HIST1H2BC;HIST1H2BD;HIST2H2BF;HKR1;HSD17B7;LDHB;LETMD1;LIAS;LUC7L;MEAF6;METTL17;METTL3;NAP1L4;NUP43;NVL;OVGP1;PEX11B;PMS2P1;POLR1C;PPIE;PIIH;RBFA;RDH16;RPP38;RSAD1  
;COQ6;DNAH3;DSN1;DUSP6;EXOSC2;EXOSC7;FANCE;FGR;GALNT12;GEMIN8;GPD1;GTF2IRD2;GTF2IRD2B;HIST1H2BC;HIST1H2BD;HIST2H2BF;HKR1;HSD17B7;LDHB;LETMD1;LIAS;LUC7L;MEAF6;METTL17;METTL3;NAP1L4;NUP43;NVL;OVGP1;PEX11B;PMS2P1;POLR1C;PPIE;PIIH;RBFA;RDH16;RPP38;RSAD1  
H2;DUSP6;EXOSC2;EXOSC7;FANCE;FGR;GALNT12;GEMIN8;GPD1;GTF2IRD2;GTF2IRD2B;HIST1H2BC;HIST1H2BD;HIST2H2BF;HKR1;HSD17B7;IL24;ILKAP;LDHB;LIAS;MEAF6;METTL17;METTL3;NAP1L4;NUP43;NVL;OVGP1;PEX11B;PMS2P1;POLR1C;PPIE;PIIH;PRPSAP2;RBFA;RPP38;RSAD1;SIRT5;SLC25A17;SLC25A4;SU  
PCID2;POLR1C;PPIE;PIIH;RBFA;RPP38;SIRT5;SUPT7L;TCEA3;TGF83;WDR77;ZNF133;ZNF202;ZNF211;ZNF232;ZNF266;ZNF329;ZNF343;ZNF419;ZNF44;ZNF530;ZNF542;ZNF544;ZNF563;ZNF671;ZNF69;ZNF773;ZNF78  
ZTF66;ZNF329;ZNF343;ZNF419;ZNF44;ZNF530;ZNF542;ZNF544;ZNF563;ZNF671;ZNF69;ZNF773;ZNF78  
RD2;GTF2IRD2B;HIST1H2BC;HIST1H2BD;HIST2H2BF;HKR1;HSD17B7;LDHB;METTL3;NPR2;NVL;PMS2P1;POLR1C;PPIE;PRR3;RDH16;SIRT5;TCEA3;ZNF133;ZNF202;ZNF211;ZNF232;ZNF266;ZNF329;ZNF343;ZNF419;ZNF44;ZNF530;ZNF542;ZNF544;ZNF563;ZNF671;ZNF69;ZNF773;ZNF78

RD2;GTF2IRD2B;HIST1H2BC;HIST1H2BD;HIST2H2BF;HKR1;HSD17B7;LDHB;METTL3;NPR2;NVL;PMS2P1;POLR1C;PPIE;PRR3;RDH16;SIRT5;TCEA3;ZNF133;ZNF202;ZNF211;ZNF232;ZNF266;ZNF329;ZNF343;ZNF419;ZNF44;ZNF530;ZNF542;ZNF544;ZNF563;ZNF671;ZNF69;ZNF773;ZNF78  
;TTL3;PMS2P1;POLR1C;PPIE;PRR3;TCEA3;ZNF133;ZNF202;ZNF211;ZNF232;ZNF266;ZNF329;ZNF343;ZNF419;ZNF44;ZNF530;ZNF542;ZNF544;ZNF563;ZNF671;ZNF69;ZNF773;ZNF78  
;SIRT5;SLC25A17;SLC25A4;UQC  
;CDK20;CDK5RAP1;CIAPIN1;CLYBL;COQ10A;COQ6;CRIP3;DEPDC7;DNAH3;DPH2;DSN1;DUSP6;EXOSC2;EXOSC7;FANCE;FGR;GALNT12;GEMIN8;GPD1;GTF2IRD2;GTF2IRD2B;HIST1H2BC;HIST1H2BD;HIST2H2BF;HKR1;HSD17B7;ILKAP;LDHB;LETMD1;LIAS;LUC7L;MEAF6;METTL17;METTL3;NAP1L4;NUP43;NVL;

H2;DUSP6;EXOSC2;EXOSC7;FANCE;FGR;GALNT12;GEMIN8;GPD1;GTF2IRD2;GTF2IRD2B;HIST1H2BC;HIST1H2BD;HIST2H2BF;HKR1;HSD17B7;IL24;ILKAP;KLB1;LDHB;LIAS;MEAF6;METTL17;METTL3;NAP1L4;NPR2;NUP43;OVGP1;PCID2;PDE6B;PMS2P1;POLR1C;PPIE;PIIH;PRPSAP2;RBFA;RDH16;RPP38;RSAD1  
/GPI1;PDE6B;PRPSAP2;PRR3;RSAD1;SIRT5;SMYD5;TCEA3;ZNF133;ZNF185;ZNF202;ZNF211;ZNF232;ZNF266;ZNF329;ZNF343;ZNF419;ZNF44;ZNF530;ZNF542;ZNF544;ZNF563;ZNF671;ZNF69;ZNF773;ZNF78  
IF211;ZNF232;ZNF266;ZNF329;ZNF343;ZNF419;ZNF44;ZNF530;ZNF542;ZNF544;ZNF563;ZNF671;ZNF69;ZNF773;ZNF78



!;CDK20;CDK5RAP1;CIAPIN1;CLYBL;COQ10A;COQ6;CRIP3;DEPDC7;DNAH3;DPH2;DSN1;DUSP6;EXOSC2;EXOSC7;FANCE;FGR;GALNT12;GEMIN8;GPD1;GTF2IRD2;GTF2IRD2B;HIST1H2BC;HIST1H2BD;HIST2H2BF;HKR1;HPCAL4;HSD17B7;ILKAP;LDHB;LETMD1;LIAS;LUC7L;MEAF6;METTL17;METTL3;NAP1L4;NUC2;EXOSC7;FANCE;FGR;GALNT12;GEMIN8;GPD1;GTF2IRD2;GTF2IRD2B;HIST1H2BC;HIST1H2BD;HIST2H2BF;HKR1;HSD17B7;ILKAP;KLB1;LDHB;LIAS;MEAF6;METTL17;METTL3;NAP1L4;NPR2;NUP43;OVGP1;PCID2;PDE6B;PMS2P1;POLR1C;PPIE;PPIH;PRPSAP2;RBFA;RDH16;RPP38;RSAD1;SIRT5;SLC25A1

IE6B;PRPSAP2;PRR3;RSAD1;SIRT5;SMYD5;TCEA3;ZNF133;ZNF185;ZNF202;ZNF211;ZNF232;ZNF266;ZNF329;ZNF343;ZNF419;ZNF44;ZNF530;ZNF542;ZNF544;ZNF563;ZNF671;ZNF69;ZNF773;ZNF78

ETTL17;METTL3;PCID2;POLR1C;PPIE;PPIH;RBFA;RPP38;SIRT5;SUPT7L;TCEA3;TGFB3;WDR77;ZNF133;ZNF202;ZNF211;ZNF232;ZNF266;ZNF329;ZNF343;ZNF419;ZNF44;ZNF530;ZNF542;ZNF544;ZNF563;ZNF671;ZNF69;ZNF773;ZNF78  
CRIP3;CXCL16;DNAH3;DNAJC9;DSN1;EXOSC2;EXOSC7;FANCE;FGR;GEMIN8;GPD1;GTF2IRD2;GTF2IRD2B;HIST1H2BC;HIST1H2BD;HIST2H2BF;HKR1;HPCAL4;HSD17B7;ILKAP;ITGA10;KLB1;LDHB;LETMD1;LIAS;LUC7L;MEAF6;METTL17;METTL3;NAP1L4;NPR2;NUP43;NVL;OCM;OVGP1;PDE6B;PEX11B;PN

2B;HKR1;HPCAL4;ILKAP;ITGA10;LIAS;METTL17;NPR2;NVL;OCM;OVGP1;PDE6B;PMS2P1;PRPSAP2;PRR3;RSAD1;SIRT5;SMYD5;TCEA3;ZNF133;ZNF185;ZNF202;ZNF211;ZNF232;ZNF266;ZNF329;ZNF343;ZNF419;ZNF44;ZNF530;ZNF542;ZNF544;ZNF563;ZNF671;ZNF69;ZNF773;ZNF78

D1;SIRT5;SUPT7L;TCEA3;TGFB3;WDR77;ZNF133;ZNF202;ZNF211;ZNF232;ZNF266;ZNF329;ZNF343;ZNF419;ZNF44;ZNF530;ZNF542;ZNF544;ZNF563;ZNF671;ZNF69;ZNF773;ZNF78!

NCE;FGR;GALNT12;GEMIN8;GPD1;GTF2IRD2;GTF2IRD2B;HIST1H2BC;HIST1H2BD;HIST2H2BF;HKR1;HSD17B7;ILKAP;KLB1;LDHB;LIAS;MEAF6;METTL17;METTL3;NAP1L4;NPR2;NUP43;OVGP1;PCID2;PDE6B;PMS2P1;POLR1C;PPIE;PPIH;PRPSAP2;RBFA;RDH16;RPP38;SIRT5;SLC25A17;SUPT7L;TCEA3;TGFI

11N8;GTF2IRD2;GTF2IRD2B;HIST1H2BC;HIST1H2BD;HIST2H2BF;HKR1;ILKAP;LIAS;MEAF6;METTL17;METTL3;NAP1L4;PCID2;PMS2P1;POLR1C;PPIE;PPIH;RBFA;RPP38;SIRT5;SUPT7L;TCEA3;TGFB3;WDR77;ZNF133;ZNF202;ZNF211;ZNF232;ZNF266;ZNF329;ZNF343;ZNF419;ZNF44;ZNF530;ZNF542;ZNF544;ZNF563;ZNF671;ZNF69;ZNF773;ZNF78!  
;COQ6;DNAH3;DSN1;DUSP6;EXOSC2;EXOSC7;FANCE;FGR;GALNT12;GEMIN8;GPD1;GTF2IRD2;GTF2IRD2B;HIST1H2BC;HIST1H2BD;HIST2H2BF;HKR1;HSD17B7;LDHB;LETMD1;LIAS;LUC7L;MEAF6;METTL17;METTL3;NAP1L4;NUP43;NVL;OVGP1;PEX11B;PMS2P1;POLR1C;PPIE;PPIH;RBFA;RDH16;RPP38;RSAD1

;COQ6;DNAH3;DSN1;DUSP6;EXOSC2;EXOSC7;FANCE;FGR;GALNT12;GEMIN8;GPD1;GTF2IRD2;GTF2IRD2B;HIST1H2BC;HIST1H2BD;HIST2H2BF;HKR1;HSD17B7;LDHB;LETMD1;LIAS;LUC7L;MEAF6;METTL17;METTL3;NAP1L4;NUP43;NVL;OVGP1;PEX11B;PMS2P1;POLR1C;PPIE;PPIH;RBFA;RDH16;RPP38;RSAD1

IIST1H2BC;HIST1H2BD;HIST2H2BF;HKR1;LUC7L;MEAF6;METTL3;NAP1L4;NUP43;NVL;PMS2P1;POLR1C;PPIE;PPIH;RPP38;SUPT7L;TCEA3;TGFB3;WDR77;ZNF133;ZNF202;ZNF211;ZNF232;ZNF266;ZNF329;ZNF343;ZNF419;ZNF44;ZNF530;ZNF542;ZNF544;ZNF563;ZNF671;ZNF69;ZNF773;ZNF78

SUPT7L;TCEA3;TGFB3;WDR77;ZNF133;ZNF202;ZNF211;ZNF232;ZNF266;ZNF329;ZNF343;ZNF419;ZNF44;ZNF530;ZNF542;ZNF544;ZNF563;ZNF671;ZNF69;ZNF773;ZNF78!

7;ZNF133;ZNF202;ZNF211;ZNF232;ZNF266;ZNF329;ZNF343;ZNF419;ZNF44;ZNF530;ZNF542;ZNF544;ZNF563;ZNF671;ZNF69;ZNF773;ZNF78!  
7L;TCEA3;TGFB3;WDR77;ZNF133;ZNF202;ZNF211;ZNF232;ZNF266;ZNF329;ZNF343;ZNF419;ZNF44;ZNF530;ZNF542;ZNF544;ZNF563;ZNF671;ZNF69;ZNF773;ZNF78!

2;ZNF211;ZNF266;ZNF329;ZNF343;ZNF419;ZNF44;ZNF530;ZNF542;ZNF544;ZNF563;ZNF671;ZNF69;ZNF773;ZNF78!

;LIAS;MEAF6;METTL17;NPR2;PCID2;POLR1C;PPIE;PRPSAP2;RSAD1;SIRT5;SUPT7L;TCEA3;TGFB3;WDR77;ZNF133;ZNF202;ZNF211;ZNF232;ZNF266;ZNF329;ZNF343;ZNF419;ZNF44;ZNF530;ZNF542;ZNF544;ZNF563;ZNF671;ZNF69;ZNF773;ZNF78

2;ZNF211;ZNF266;ZNF329;ZNF343;ZNF419;ZNF44;ZNF530;ZNF542;ZNF544;ZNF563;ZNF671;ZNF69;ZNF773;ZNF78!  
7;ZNF133;ZNF202;ZNF211;ZNF232;ZNF266;ZNF329;ZNF343;ZNF419;ZNF44;ZNF530;ZNF542;ZNF544;ZNF563;ZNF671;ZNF69;ZNF773;ZNF78!

3;TGFB3;WDR77;ZNF133;ZNF202;ZNF211;ZNF232;ZNF266;ZNF329;ZNF343;ZNF419;ZNF44;ZNF530;ZNF542;ZNF544;ZNF563;ZNF671;ZNF69;ZNF773;ZNF78!

2;ZNF211;ZNF266;ZNF329;ZNF343;ZNF419;ZNF44;ZNF530;ZNF542;ZNF544;ZNF563;ZNF671;ZNF69;ZNF773;ZNF78!





!PS19;RPS25;RPS6;ZNRD1

RNPA1;HS3ST3B1;ICT1;ISY1;MDH1;MED10;MRPS16;MRPS7;NACA;NAP1L1;NDUFC2;NPM1;PCNA;PER2;POLR2H;POP4;PPIA;PRDX1;PSMA5;PSMB6;RAN;RARRES3;RPIA;RPL10;RPL10A;RPL12;RPL13A;RPL14;RPL19;RPL22;RPL23A;RPL24;RPL27A;RPL3;RPL32;RPL35A;RPL36;RPL37;RPL37A;RPL4;RPL5;RPL7A;RPL12;RPL14;RPL19;RPL22;RPL23A;RPL24;RPL27A;RPL3;RPL35A;RPL37;RPL4;RPL5;RPL7A;RPS11;RPS13;RPS14;RPS16;RPS18;RPS20;RPS25;RPS3;RPS4X;RPS5;SNRPD3;SNUPN;SPAG7;SSBP1;TRNAU1AP;ZGLP1;ZNRD  
RPL13A;RPL14;RPL19;RPL22;RPL23A;RPL24;RPL27A;RPL3;RPL32;RPL35A;RPL36;RPL37;RPL37A;RPL4;RPL5;RPL7A;RPS11;RPS12;RPS13;RPS14;RPS16;RPS18;RPS19;RPS20;RPS21;RPS23;RPS25;RPS27A;RPS3;RPS4X;RPS5;RPS6;RPS8;RPSA;SNUPN;SRPRB;STX8;TOMM6;TRAPP3;UXT;VDAC  
'D2;SNRPD3;SNUPN  
'ED10;MRPS16;MRPS7;NACA;NAP1L1;NPM1;PARL;PCNA;PER2;POLR2H;POP4;PPIA;PSMA5;PSMB6;RAN;RPL10;RPL10A;RPL12;RPL13A;RPL14;RPL19;RPL22;RPL23A;RPL24;RPL27A;RPL3;RPL32;RPL35A;RPL36;RPL37;RPL37A;RPL4;RPL5;RPL7A;RPS11;RPS12;RPS13;RPS14;RPS16;RPS18;RPS19;RPS20;RPS21;R  
GN1;HNRNPA1;HS3ST3B1;ICT1;ISY1;MDH1;MED10;MRPS16;MRPS7;NACA;NAP1L1;NDUFC2;NPM1;PARL;PCNA;PER2;POLR2H;POP4;PPIA;PRDX1;PSMA5;PSMB6;RAN;RARRES3;RPIA;RPL10;RPL10A;RPL12;RPL13A;RPL14;RPL19;RPL22;RPL23A;RPL24;RPL27A;RPL3;RPL32;RPL35A;RPL36;RPL37;RPL37A;RPL4;R  
HS3ST3B1;ICT1;ISY1;MDH1;MED10;MRPS16;MRPS7;NACA;NAP1L1;NPM1;PARL;PCNA;PER2;POLR2H;POP4;PPIA;PSMA5;PSMB6;RAN;RARRES3;RPIA;RPL10;RPL10A;RPL12;RPL13A;RPL14;RPL19;RPL22;RPL23A;RPL24;RPL27A;RPL3;RPL32;RPL35A;RPL36;RPL37;RPL37A;RPL4;RPL5;RPL7A;RPS11;RPS12;RPS13  
RNPA1;HS3ST3B1;ICT1;ISY1;MDH1;MED10;MRPS16;MRPS7;NACA;NAP1L1;NPM1;PARL;PCNA;PER2;POLR2H;POP4;PPIA;PSMA5;PSMB6;RAN;RARRES3;RPIA;RPL10;RPL10A;RPL12;RPL13A;RPL14;RPL19;RPL22;RPL23A;RPL24;RPL27A;RPL3;RPL32;RPL35A;RPL36;RPL37;RPL37A;RPL4;RPL5;RPL7A;RPS11;RPS12

IDX1;PSMA5;PSMB6;RAN;RPL3;RPL36;RPL4;RPL5;RPS13;RPS14;RPS19;RPS25;RPS27A;RPS6;SKP1;SNRPD2;SNRPD3;SNUPN;ZNRD:

H;POP4;PRDX1;PSMA5;PSMB6;RAN;RPL3;RPL36;RPL4;RPL5;RPS13;RPS14;RPS19;RPS25;RPS27A;RPS6;SKP1;SNRPD2;SNRPD3;SSBP1;SUCLG1;ZNRD:  
RAN;RPL3;RPL36;RPL4;RPL5;RPS13;RPS14;RPS19;RPS25;RPS27A;RPS6;SKP1;SNRPD2;SNRPD3;ZNRD:  
OLR2H;POP4;PRDX1;RAN;RPL10A;RPL12;RPL14;RPL19;RPL22;RPL23A;RPL24;RPL27A;RPL3;RPL35A;RPL37;RPL4;RPL5;RPL7A;RPS11;RPS13;RPS14;RPS16;RPS18;RPS20;RPS25;RPS3;RPS4X;RPS5;SNRPD3;SNUPN;SPAG7;SRPRB;SSBP1;SUCLG1;TRNAU1AP;VDAC3;ZGLP1;ZNRD  
OLR2H;POP4;PRDX1;RAN;RPL10A;RPL12;RPL14;RPL19;RPL22;RPL23A;RPL24;RPL27A;RPL3;RPL35A;RPL37;RPL4;RPL5;RPL7A;RPS11;RPS13;RPS14;RPS16;RPS18;RPS20;RPS25;RPS3;RPS4X;RPS5;SNRPD3;SNUPN;SPAG7;SRPRB;SSBP1;SUCLG1;TRNAU1AP;VDAC3;ZGLP1;ZNRD  
SMA5;PSMB6;RAN;RPL3;RPL36;RPL4;RPL5;RPS13;RPS14;RPS19;RPS25;RPS27A;RPS6;SKP1;SNRPD2;SNRPD3;SSBP1;SUCLG1;ZNRD:  
SMA5;PSMB6;RAN;RPL3;RPL36;RPL4;RPL5;RPS13;RPS14;RPS19;RPS25;RPS27A;RPS6;SKP1;SNRPD2;SNRPD3;SSBP1;SUCLG1;ZNRD:

2;EIF3H;EIF3M;FAU;GSTM3;GTF3C6;HMG1;HNRNPA1;HS3ST3B1;ICT1;ISY1;ITGB1BP1;MDH1;MED10;MRPS16;MRPS7;MYL12A;MYL5;NACA;NAP1L1;NBPF10;NDUFC2;NOP16;NPM1;PARL;PCNA;PDCL3;PER2;POLR2H;POMP;POP4;PPIA;PRDX1;PSMA5;PSMB6;RAN;RANGRF;RPIA;RPL10;RPL10A;RPL12;RPL1  
2;EIF3H;EIF3M;FAU;GSTM3;GTF3C6;HMG1;HNRNPA1;HS3ST3B1;ICT1;ISY1;ITGB1BP1;MDH1;MED10;MRPS16;MRPS7;MYL12A;MYL5;NACA;NAP1L1;NBPF10;NDUFC2;NOP16;NPM1;PARL;PCNA;PDCL3;PER2;POLR2H;POMP;POP4;PPIA;PRDX1;PSMA5;PSMB6;RAN;RANGRF;RPIA;RPL10;RPL10A;RPL12;RPL1

'S19;RPS21;RPS25;RPS6;RPS8;RPSA;SNRPD2;SNRPD3;SNUPN

!AP1L1;NOP16;NPM1;PARL;PCNA;PER2;POLR2H;POMP;POP4;PPIA;PRDX1;PSMA5;PSMB6;RAN;RANGRF;RPL23A;RPL3;RPL36;RPL4;RPL5;RPS13;RPS14;RPS19;RPS25;RPS27A;RPS3;RPS6;RPSA;SKP1;SNRPD2;SNRPD3;SNUPN;SPAG7;SUGT1;THYN1;TRNAU1AP;UXT;ZGLP1;ZNRD

J;GSTM3;GTF3C6;HDHD1;HMG1;HNRNPA1;HS3ST3B1;ICT1;IL20RB;ISY1;ITGB1BP1;MDH1;MED10;MRPS16;MRPS7;MYL12A;NACA;NAP1L1;NDUFC2;NPM1;PARL;PCNA;PDCL3;PER2;POLR2H;POP4;PPIA;PRDX1;PSMA5;PSMB6;RAN;RANGRF;RARRES3;RPIA;RPL10;RPL10A;RPL12;RPL13A;RPL14;RPL19;RPL22

PM1;PCNA;POLR2H;POMP;PSMA5;PSMB6;RAN;RPL23A;SKP1;SNUPN;STX8;SUCLG1;SUGT1;TRAPPC3;UQCRRF51;UXT;VDAC:

};ARHGEF19;ARL11;ARL4D;ASAP1;ATF6;ATP6V1A;ATXN1;ATXN7;BCL2L11;BMX;C3AR1;CACNA1E;CBS;CCR1;CCR2;CD59;CDA;CDC42EP3;CDH2;CDK14;CDK4;CDK5;CEP63;CHRNA10;CLEC1A;CNTNAP3;COMMD7;CSRNP1;CUL3;CXCR1;CYTH4;DNAJB11;DNAJC3;DOCK1;DOCK4;DOK4;EMR3;EXT1;FCGR1A;FCGF  
};ARHGEF19;ARL11;ARL4D;ASAP1;ATF6;ATP6V1A;ATXN1;ATXN7;BCL2L11;BMX;C3AR1;CACNA1E;CBS;CCR1;CCR2;CD59;CDA;CDC42EP3;CDH2;CDK14;CDK4;CDK5;CEP63;CHRNA10;CLEC1A;CNTNAP3;COMMD7;CSRNP1;CUL3;CXCR1;CYTH4;DNAJB11;DNAJC3;DOCK1;DOCK4;DOK4;EMR3;EXT1;FCGR1A;FCGF  
1;ARL4D;ASAP1;ATF6;ATP6V1A;ATXN1;ATXN7;BCL2L11;BMX;C3AR1;CBS;CCR1;CCR2;CD59;CDA;CDC42EP3;CDH2;CDK14;CDK4;CDK5;CEP63;CLEC1A;CNTNAP3;COMMD7;CSRNP1;CUL3;CXCR1;CYTH4;DNAJB11;DNAJC3;DOCK1;DOCK4;DOK4;EMR3;EXT1;FCGR1A;FCGR1B;FFAR2;FFAR3;FGF13;FLOT1;FOXO  
};ARHGEF19;ARL11;ARL4D;ASAP1;ATF6;ATP6V1A;ATXN1;ATXN7;BCL2L11;BMX;C3AR1;CACNA1E;CBS;CCR1;CCR2;CD59;CDA;CDC42EP3;CDH2;CDK14;CDK4;CDK5;CEP63;CHRNA10;CLEC1A;CNTNAP3;COMMD7;CSRNP1;CUL3;CXCR1;CYTH4;DNAJB11;DNAJC3;DOCK1;DOCK4;DOK4;EMR3;EXT1;FCGR1A;FCGF  
APH1B;APOBEC3A;AQP9;ARHGAP19;ARHGEF19;ARL11;ARL4D;ARSB;ASAP1;ATF6;ATP6V1A;ATP7B;ATXN1;ATXN7;AVIL;BCL2L11;BEST1;BMX;BST1;C3AR1;CA4;CACNA1E;CASP5;CBS;CCR1;CCR2;CD177;CD55;CD59;CDA;CDC42EP3;CDH2;CDK14;CDK4;CDK5;CEP63;CHRNA10;CLEC1A;CNGA4;CNTNAP3;COM  
ENTPD1;F5;FCGR1A;FPR2;GNAQ;H3F3B;HIF1A;HMGCRC;HP;HPSE;IL10RB;IL18RAP;IL1B;IL1RN;JMJD1C;LAMP2;LYN;LYVE1;MRV1;NAIP;NFE2;NFE2L2;ORM1;ORM2;OSM;PAPSS2;PLAU;PPAP2B;PROK2;RAB27A;SBNO2;SCARF1;SLC8A1;SOD2;TLR2;TLR4;TLR5;TNFRSF1A;TREM1;WNT10B;ZFP3

'BB;DNAJC3;EBP;FCGR1A;FCGR1B;FCGR3B;FOXO3;FYB;GIMAP1;HCAR2;HIF1A;IFNAR1;IFNGR2;IGSF6;IL10RB;IL18RAP;IL1B;IL1R1;IL1R2;IL1RN;IRAK3;ITGAD;KLF6;LILRB3;LMO4;LYN;NAIP;NCF4;NFL3;NPEPPS;ORM1;ORM2;OSBP1A;OSM;PAK2;PDE4B;PELI2;PGLYRP1;PIAS1;PICALM;PNP;PTPRE;PVRL2;RAB27 ARHGAP19;ARHGEF19;ARL11;ARL4D;ASAP1;ATF6;ATP6V1A;ATXN1;ATXN7;BCL2L11;BMX;C3AR1;CACNA1E;CASP5;CBS;CCR1;CCR2;CD59;CDA;CDC42EP3;CDH2;CDK14;CDK4;CDK5;CEP63;CLEC1A;CNTNAP3;COMMD7;CSRNP1;CUL3;CXCR1;CYTH4;DGAT2;DNAJB11;DNAJC3;DOCK4;DOK4;EMR3;EXT;BB;DNAJC3;FCGR1A;FCGR1B;FPR2;HIF1A;HP;IFNAR1;IFNGR2;IL10RB;IL18RAP;IL1B;IL1R1;IL1RN;INHBB;IRAK3;LILRB3;LYN;NAIP;ORM1;ORM2;OSM;PAK2;PELI2;PGLYRP1;PIAS1;PLD1;PROK2;PVRL2;RAB27A;SBNO2;SOC3;SRPK1;SRPK2;TARBP2;TLR2;TLR4;TLR5;TNFRSF1A;ZFP31 9;ARL4D;ARMCX6;ASAP1;ASTN2;ATF6;ATP11A;ATP2C2;ATP5G1;ATP6V1A;ATP7B;ATP9A;AVL9;BCL2L11;BEST1;BMX;BST1;C19orf59;C3AR1;C7orf53;CA4;CACNA1E;CCR1;CCR2;CD177;CD300LD;CD55;CD59;CDC42EP3;CDH2;CDK14;CDK4;CDK5;CEACAM3;CEACAM4;CHRNA4;CHRNA10;CLDN6;CLEC1A;CLMN;CNGA4;L1B;IL1RN;LYN;NAIP;ORM1;ORM2;OSM;PROK2;SBNO2;TLR2;TLR4;TLR5;TNFRSF1A;ZFP31 9;ARL4D;ARMCX6;ASAP1;ASTN2;ATF6;ATP11A;ATP2C2;ATP5G1;ATP6V1A;ATP7B;ATXN1;ATXN7;AVIL;BCL2L11;BEND7;BMX;CA4;CBS;CCDC64B;CCR1;CCR2;CCT4;CD300LD;CD59;CDA;CD42EP3;CDH2;CDK14;CDK4;CDK5;CEP63;CHRNA10;CIR1;CLDN6;CLMN;CNTNAP3;COMMD7;CR1;CTBP2;CUL3;CXCR1;CYBB;D ;KLF6;KPNA1;KPNA4;NUP50;NUPL1;PIAS1;SOC3;TNFRSF1A

H;SOC3;TARBP2;TRIB1  
H;SOC3;TARBP2;TRIB1

;CR1;CXCR1;DOCK1;DOCK4;EXT1;FCGR1A;FPR1;FPR2;GSK3B;HMGCGR;HPSE;IL1B;INHBB;KAL1;LYN;MYO10;NCOA1;NFE2L2;OSM;PAK2;PDE4B;PGLYRP1;PLAU;PLD1;PLXNC1;PROK2;RASGRP4;RS1;SBNO2;SCARF1;SDCBP;SLC8A1;SOD2;SOS2;TLR2;TLR4;TLR5;TNFRSF1A;TNFSF14;WAC;ZFP3 12;OSM;PAK2;PELI2;PIAS1;PLAU;PPAP2B;PVRL2;SBNO2;SCARF1;SDCBP;SOC3;STK3;TARBP2;TLR2;TLR4;TLR5;TNFRSF1A;UIMC1;WAC;ZAK;ZFP31 2;KLF6;KPNA1;KPNA4;MME;NUP50;NUPL1;PHB;PIAS1;SOC3;TNFRSF1A

ACAM4;CLEC1A;CR1;CYBB;EBP;ENTPD1;FCGR1A;FFAR2;FFAR3;FLOT1;GNAQ;GPR17;HAS1;HCAR3;IFNAR1;IFNGR2;IGSF6;IL10RB;IL13RA1;IL1R1;IQGAP1;ITGAD;KCNE1;KCNJ15;KCNK1;LILRB3;LYN;LYVE1;MME;MYO10;NAIP;NCF4;OSM;PDZ3;PHB;PICALM;PLB1;RAB27A;RAPGEF2;RHOH;RS1;SDCBP;SHROOM 1S;CCR1;CCR2;CDH2;CDK5;CEP63;CUL3;CYTH4;DOCK1;DOCK4;DOK4;FGF13;FLOT1;FOXO3;FPR1;FYB;GPR89A;GSK3B;GTSE1;HIF1A;HMGCGR;HPSE;IFNAR1;IL1B;IL1RN;IQGAP1;IRAK3;LIMD1;LITAF;LYN;MCTP2;MLLT11;OSM;PDZ3;PDZ8;PELI2;PIAS1;PLD1;PROK2;RAB1A;RAB27A;RAB31;RAPGEF2;RASGRP4; 1ST1;C3AR1;CA4;CACNA1E;CCR1;CCR2;CD177;CD300LD;CD55;CD59;CDH2;CDK14;CDK5;CEACAM4;CHRNA10;CLDN6;CLEC1A;CNTNAP3;CR1;CXCR1;CYBB;CYTH4;EBP;EMR3;ENTPD1;F5;FAM120A;FCGR1A;FCGR1B;FCGR1C;FCGR2A;FCGR3B;FFAR2;FFAR3;FGF13;FLOT1;FPR1;FPR2;GNAQ;GPR141;GPR17;GPR

YB;IFNAR1;IFNGR2;IGSF6;IL10RB;IL18RAP;IL1B;IL1R1;IL1R2;IL1RN;IRAK3;ITGAD;LYN;NAIP;NCF4;NFL3;OSM;PAK2;PELI2;PGLYRP1;PIAS1;PNP;PVRL2;RAB27A;SBNO2;SECTM1;SOC3;SRPK1;SRPK2;TLR2;TLR4;TLR5;TNFSF14;TREM 1ST1;C3AR1;CA4;CACNA1E;CCR1;CCR2;CD177;CD300LD;CD55;CD59;CDH2;CDK14;CDK5;CEACAM4;CHRNA10;CLDN6;CLEC1A;CNTNAP3;CR1;CXCR1;CYBB;CYTH4;EBP;EMR3;ENTPD1;F5;FAM120A;FCGR1A;FCGR1B;FCGR1C;FCGR2A;FCGR3B;FFAR2;FFAR3;FGF13;FLOT1;FPR1;FPR2;GNAQ;GPR141;GPR17;GPR SBNO2;SCARF1;TLR2;TLR4;TNFRSF1A;WAC;ZFP31 2;KLF6;KPNA1;KPNA4;MME;NUP50;NUPL1;PHB;PIAS1;SOC3;TNFRSF1A

1;CACNA1E;CBS;CCR1;CCR2;CD177;CD55;CD59;CDK4;CEP63;CLEC1A;CR1;CXCR1;CYBB;DNAJB11;DNAJC3;DOCK1;EDEM2;ENTPD1;F5;FCGR1A;FCGR1B;FOXO3;FPR2;GNAQ;GSK3B;GTSE1;H3F3B;HIF1A;HMGCGR;HP;HPSE;HSPA6;IDH1;IFNAR1;IFNGR2;IL10RB;IL18RAP;IL1B;IL1R1;IL1RN;INHBB;IRAK3;JMJD1C;L ;KLF6;KPNA1;KPNA4;MME;NUP50;NUPL1;PHB;PIAS1;SOC3;TNFRSF1A

AR1;CACNA1E;CBS;CCR1;CCR2;CD55;CD59;CDH2;CDK14;CDK5;CR1;CUL3;CYTH4;DOCK4;FCGR1A;FCGR1B;FLOT1;FPR1;FYB;GPR89A;GPM2;GSK3B;HEY1;HIF1A;HMGCGR;HP;HPSE;IFNAR1;IFNGR2;IL1B;IL1RN;IRAK3;LIMD1;LITAF;LYN;MLLT11;MYO5A;NCOA1;NFE2L2;NPTN;OSM;PAK2;PELI2;PGLYRP1;PHB;P ;APAF1;APBB2;APH1B;APOBEC3A;AQ9;ARHGAP19;ARHGEF19;ARL11;ARL4D;ARPC5;ARPC5L;ARSB;ASAP1;ATF6;ATP11A;ATP2C2;ATP5G1;ATP6V1A;ATP7B;ATP9A;ATXN1;ATXN7;AVIL;AVL9;BCL2L11;BMX;BRWD3;C3AR1;CACNA1E;CASP4;CASP5;CBS;CCR1;CCR2;CD177;CD55;CD59;CDA;CDC123;CDC42EP3; DNAJC3;FCGR1A;FCGR1B;FOXO3;GPR17;GSK3B;HAS1;HIF1A;HMGCGR;HP;HPSE;IFNAR1;IFNGR2;IL1B;IL1R1;IL1RN;INHBB;IRAK3;KLF6;KPNA1;KPNA4;LITAF;LYN;MME;MYO5A;NFE2L2;NPTN;NUP50;NUPL1;PDE4B;PDK3;PHB;PIAS1;PTPRE;RAB31;RNF111;SLC8A1;SOC3;SOD2;TARBP2;TLR2;TLR4;TNFRSF1A;TRIB1;UBR2;V 6;ATP11A;ATP2C2;ATP5G1;ATP6V1A;ATP7B;ATP9A;AVL9;BCL2L11;BEST1;BMX;BST1;C19orf59;C3AR1;C7orf53;CA4;CACNA1E;CCR1;CCR2;CD177;CD300LD;CD55;CD59;CDH2;CDK5;CEACAM3;CEACAM4;CHRNA10;CLDN6;CLEC1A;CLMN;CNGA4;CNTNAP3;CR1;CXCR1;CYBB;DGAT2;DNAJC3;EBP;EDEM2;ELO V;MD7;CXCR1;DGAT2;DNAJB11;DNAJC3;DOCK4;FCGR1A;FCGR1B;FOXO3;GPR17;GSK3B;HAS1;HIF1A;HMGCGR;HP;HPSE;IFNAR1;IFNGR2;IL1B;IL1R1;IL1RN;INHBB;IQGAP1;IRAK3;KLF6;KPNA1;KPNA4;LITAF;LYN;MME;MYO5A;NCOA1;NFE2L2;NPEPPS;NPTN;NUP50;NUPL1;OPLAH;PAPSS2;PDE4B;PDK3;PHB;PIAS1;PT F;GPR89A;IL1B;ITM2B;LAMP2;MME;MYO5A;NCF4;PICALM;RAB27A;RAB31;SDCBP;SEC24D;SMAGP;SNAP23;STX12;STX3;STX6;SYN2;SYNGR3;TRIM9;VAMP3;WIPF1;WLS;YIPF

IQ2;SOC3;TARBP2;TLR2;TLR4;TLR5;TNFRSF1A;ZFP31

;RN;IRAK3;KLF6;KPNA1;KPNA4;MME;NUP50;NUPL1;PHB;PIAS1;SOC3;TNFRSF1A

PM6;TRPV5;VAMP3  
'D1;FFAR2;FFAR3;GPR17;HAS1;HCAR3;IFNAR1;IFNGR2;IGSF6;IL10RB;IL13RA1;IL1R1;ITGAD;KCNE1;KCNJ15;KCNK1;LILRB3;LYN;LYVE1;MME;NCF4;OSM;PHB;RAPGEF2;SDCBP;SIT1;SLC22A1;SLC22A14;SLC22A4;SLC8A1;ST3GAL5;TLR2;TLR4;TM9SF2;TNFRSF1A;TRPV 1S;CCR1;CDH2;CDK14;CDK5;CUL3;CYTH4;DOCK4;FLOT1;FPR1;GPR89A;GPM2;GSK3B;HCAR2;HEY1;HIF1A;HMGCGR;HPSE;IFNAR1;IFNGR2;IL1B;IL1RN;INHBB;IQGAP1;IRAK3;LIMD1;LITAF;LYN;MARCKS;MLLT11;MYO5A;NPTN;OSM;PAK2;PELI2;PHB;PIAS1;PLAU;PPAP2B;PROK2;PTPRE;RAPGEF2;RASGRP4;RHO

;CDK14;CLEC1A;COMMD7;CSRNP1;CUL3;CXCR1;DOCK1;DOK4;EMR3;FCGR1A;FCGR1B;FFAR2;FFAR3;FOXO3;FPR1;FPR2;FYB;GNAQ;GPR141;GPR17;GPR97;GPM2;GSK3B;HCAR3;HEY1;HIF1A;IFNAR1;IFNGR2;IGSF6;IL13RA1;IL18RAP;IL1B;IL1R1;IL1RN;INHBB;IRAK3;ITGAD;KLF6;KPNA1;KPNA4;LILRB3;LIMD1 1S;CCR1;CDH2;CDK14;CDK5;CUL3;CYTH4;DOCK4;FLOT1;FPR1;GPR89A;GPM2;GSK3B;HCAR2;HEY1;HIF1A;HMGCGR;HPSE;IFNAR1;IFNGR2;IL1B;IL1RN;INHBB;IQGAP1;IRAK3;LIMD1;LITAF;LYN;MARCKS;MLLT11;MYO5A;NPTN;OSM;PAK2;PELI2;PHB;PIAS1;PLAU;PPAP2B;PROK2;PTPRE;RAPGEF2;RASGRP4;RHO

2;ANXA3;APAF1;APBB2;APH1B;APOA1BP;APOBEC3A;ARHGEF19;ARL11;ARL4D;ARPC5;ARPC5L;ARSB;ASAP1;ATF6;ATP11A;ATP2C2;ATP5G1;ATP6V1A;ATP7B;ATP9A;ATXN1;ATXN7;AVIL;BCL2L11;BEST1;BMX;BRWD3;C3AR1;CACNA1E;CASP4;CASP5;CBS;CCR1;CCR2;CD177;CD55;CD59;CDA;CDC123;CDC42EP3;CDH2;CDK14;CDK4;CDK5;CENPV;CEP63;CHF GPR89A;IL1B;ITM2B;LAMP2;MME;MYO5A;NCF4;PICALM;RAB27A;RAB31;SDCBP;SEC24D;SMAGP;SNAP23;STX12;STX3;STX6;SYN2;SYNGR3;TRIM9;VAMP3;WIPF1;WLS;YIPF

2;ANXA3;APAF1;APBB2;APH1B;APOA1BP;APOBEC3A;ARHGEF19;ARL11;ARL4D;ARPC5;ARPC5L;ARSB;ASAP1;ATF6;ATP11A;ATP2C2;ATP5G1;ATP6V1A;ATP7B;ATP9A;ATXN1;ATXN7;AVIL;BCL2L11;BEND7;BMX;BST1;CA4;CACNA1E;CAPN12;CAPN13;CAPN8;CBS;CCDC64B;CCR1;CCR2;CCT4;CD300LD;CD59;CD ;K3;LITAF;LYN;OSM;PELI2;PIAS1;PROK2;RAPGEF2;RHOH;SDCBP;SECTM1;SOC3;SRPK1;SRPK2;STK3;TLR2;TLR4;TNFRSF1A;TNFSF14;TRIB1;WLS;ZAK;ZFP31 2;KLF6;KPNA1;KPNA4;MME;NUP50;NUPL1;PHB;PIAS1;SOC3;TNFRSF1A

1A;ATP2C2;ATP5G1;ATP6V1A;ATP7B;ATP9A;AVL9;BEST1;BST1;C19orf59;C3AR1;C7orf53;CA4;CACNA1E;CCR1;CCR2;CD177;CD300LD;CD55;CD59;CDH2;CEACAM3;CEACAM4;CHRNA10;CLDN6;CLEC1A;CLMN;CNGA4;CNTNAP3;CR1;CXCR1;CYBB;DGAT2;EBP;ELOVL5;EMR3;ENTPD1;EXT1;FCGR1A;FCGR1B;FCC L11;BRWD3;C3AR1;CACNA1E;CBS;CCR1;CCR2;CD177;CD55;CD59;CDC42EP3;CDK4;CDK5;CHRNA10;DGAT2;DOCK1;ENTPD1;F5;FGF13;FLI1;FOXO3;GNAQ;GPR89A;GSK3B;H3F3B;HCAR2;HIF1A;HMGCGR;HP;HPSE;IL1B;IL1RN;INHBB;IQGAP1;JMJD1C;KCNE1;LAMP2;LIMD1;LYN;MARCKS;MLLT11;MRV11;MYO1

1ALNT14;GIMAP1;GLIPR2;GOLGA7B;GPR89A;ITM2B;LITAF;LYN;MYO5A;NEDD9;NMNAT2;PICALM;PLD1;PPAP2B;PRRG4;RAB1A;RAB27A;RAB31;RTN3;SEC24D;SECTM1;SH3GLB1;SNAP23;ST3GAL4;ST3GAL5;ST6GALNAC2;STX11;STX12;STX6;TNFRSF1A;USP32;WL GPR89A;IL1B;ITM2B;LAMP2;MME;MYO5A;NCF4;PICALM;RAB27A;RAB31;SDCBP;SEC24D;SMAGP;SNAP23;STX12;STX3;STX6;SYN2;SYNGR3;TRIM9;VAMP3;WIPF1;WLS;YIPF

2;TLR4;TNFRSF1A;TRIB1;UBR2;WNT10E  
CDC42EP3;CDK4;CYBB;DGAT2;DMXL2;DNAJC3;DOCK4;EBP;EDEM2;ELOVL5;EXT1;FCGR1A;FCGR1B;GABARAP1;GALNT14;GIMAP1;GLIPR2;GNAQ;GOLGA7B;GPR89A;HMGCGR;ITM2B;KAZN;KPNA1;LAMP2;LBR;LMNB1;MBOAT2;MRV11;NMNAT2;NUP50;NUPL1;PICALM;PLD1;RAB27A;RAB31;RANBP1;RTN3;SI

.NKRD6;ANTXR2;ANXA3;AP3B2;APAF1;APH1B;APOA1BP;APOBEC3A;ARHGAP19;ARL4D;ARPC5;ARPC5L;ARSB;ASAP1;ATF6;ATP11A;ATP2C2;ATP5G1;ATP6V1A;ATP7B;ATP9A;ATXN1;ATXN7;AVIL;AVL9;BCL2L11;BEND5;BEST1;BMX;C21orf59;CA4;CAPN8;CBS;CCDC125;CCR2;CCT4;CDA;CDC123;CDC42EP3;CDK

ASAP1;ATP2C2;ATP5G1;ATP7B;CA4;CACNA1E;CBS;CCR2;CD55;CDA;CDKL5;COQ4;CYBB;DCTPP1;DGAT2;DOCK1;DOCK4;DPYD;EBP;ELOVL5;ENO3;EXT1;GBE1;GDE1;GMPR2;GNAQ;GSK3B;HAL;HAS1;HCAR2;HIF1A;HMGCR;HPSE;IDH1;IDS;IL1B;IL1RN;INPP5A;IQGAP1;JHDM1D;KDM1B;LBR;LYN;LYVE1;MARCKS;1A;ATP2C2;ATP5G1;ATP6V1A;ATP7B;ATP9A;AVL9;BEST1;C19orf59;C3AR1;C7orf53;CACNA1E;CCR1;CCR2;CD300LD;CD55;CDH2;CEACAM3;CEACAM4;CHRNA10;CLDN6;CLEC1A;CLMN;CNGA4;CNTNAP3;CR1;CXCR1;CYBB;DGAT2;EBP;ELOVL5;EMR3;ENTPD1;EXT1;FCGR1A;FCGR1B;FCGR1C;FCGR2A;FFAR2;FF;ISBPL11;OSBPL1A;OXER1;PICALM;PLD1;RAPGEF2;RASGRP4;RS1;SBF2;SH3GLB1;SNTA1;SNTG2;SOS2;STX3;TIAM2;TLR2;TLR4;WDFY

TXN1;ATXN7;BMX;CBS;CCR2;CDA;CDK4;CDKL5;DCTPP1;DGAT2;DNAJB11;DNAJC3;DOCK1;DOCK4;DPYD;DUSP13;FGF13;FPR1;FYB;GMPR2;GNAQ;GSK3B;HMGCR;IDH1;IL1B;IL1RN;INPP5A;IQGAP1;IRAK3;LIMD1;LYN;MAK;MBOAT2;NMNAT2;NPTN;NT5C2;NUDT5;OSM;OXER1;PAK2;PANK2;PAPSS2;PDE4B;PD1E;CBS;CCR1;CCR2;CD55;CDK4;COMMD7;CXCR1;DGAT2;DNAJB11;DNAJC3;DOCK1;DOCK4;EBP;EDEM2;EXT1;FCGR1A;FCGR1B;FOXO3;FPR1;FPR2;GPR17;GSK3B;HAS1;HIF1A;HMGCR;HP;HSPA6;IDH1;IFNAR1;IFNGR2;IL1B;IL1R1;IL1RN;INHBB;IQGAP1;IRAK3;KAL1;KLF6;KPNA1;KPNA4;LITAF;LYN;MME;MYO1

TXN1;ATXN7;BMX;CBS;CCR2;CDA;CDK4;CDKL5;DCTPP1;DGAT2;DNAJB11;DNAJC3;DOCK1;DOCK4;DPYD;DUSP13;ELOVL5;FGF13;FPR1;FYB;GMPR2;GNAQ;GSK3B;HMGCR;IDH1;IL1B;IL1RN;INPP5A;IQGAP1;IRAK3;LIMD1;LYN;MAK;MBOAT2;NMNAT2;NPTN;NT5C2;NUDT5;OSM;OXER1;PAK2;PANK2;PAPSS2;P;AP3B2;APAF1;APBB2;APH1B;APOBEC3A;AQ9;ARHGAP19;ARHGEF19;ARL11;ARL4D;ARPC5;ARPC5L;ARSB;ASAP1;ATF6;ATP11A;ATP2C2;ATP5G1;ATP6V1A;ATP7B;ATP9A;ATXN1;ATXN7;AVIL;AVL9;BCL2L11;BEST1;BMX;BRWD3;BST1;C3AR1;CA4;CACNA1E;CASP4;CASP5;CBS;CCNI;CCR1;CCR2;CD177;CD55;

GPR89A;IL1B;IL1RN;ITM2B;LAMP2;MME;MYO5A;NCF4;PICALM;RAB27A;RAB31;SDCBP;SEC24D;SMAGP;SNAP23;STX12;STX3;STX6;SYN2;SYNGR3;TRIM9;VAMP3;WIPF1;WLS;YIPF

FP2C2;ATP5G1;ATP7B;CA4;CACNA1E;CBS;CCR2;CDA;CDKL5;COQ4;DCTPP1;DGAT2;DOCK1;DOCK4;DPYD;EBP;ELOVL5;ENO3;EXT1;GBE1;GDE1;GMPR2;GNAQ;GSK3B;HAL;HAS1;HIF1A;HMGCR;HPSE;IDH1;IDS;IQGAP1;LBR;LYVE1;MARCKS;MBOAT2;ME2;MME;MYO5A;NCOA1;NCOA2;NMNAT2;NPL;NT5C2;NL

DOCK4;DPYD;GMPR2;GNAQ;GSK3B;HMGCR;IDH1;IQGAP1;NMNAT2;NT5C2;NUDT5;OXER1;PANK2;PAPSS2;PDE4B;PDZD3;PNP;RAB1A;RAB31;TGM

331;SEC24D;SMAGP;VAMP3;WLS

ICTPP1;DGAT2;DOCK1;DOCK4;DPYD;GMPR2;GNAQ;GSK3B;HMGCR;IDH1;INPP5A;IQGAP1;MBOAT2;NMNAT2;NT5C2;NUDT5;OXER1;PANK2;PAPSS2;PDE4B;PDZD3;PFKFB4;PGS1;PLB1;PLBD1;PLD1;PNP;PPAP2B;RAB1A;RAB31;SH3GLB1;TGM

PP1;DOCK1;DOCK4;DPYD;GMPR2;GNAQ;GSK3B;HMGCR;IDH1;IQGAP1;NMNAT2;NT5C2;NUDT5;OXER1;PANK2;PAPSS2;PDE4B;PDZD3;PNP;RAB1A;RAB31;TGM

ILYRP1;PIAS1;PVRL2;RAB27A;SOCS3;SRPK1;SRPK2;TLR2;TLR4;TLR5

ARHGAP19;ARHGEF19;ARL11;ARL4D;ARPC5;ARPC5L;ASAP1;ATF6;ATP6V1A;ATXN1;ATXN7;AVIL;BCL2L11;BEST1;BMX;BRWD3;C3AR1;CACNA1E;CASP4;CASP5;CBS;CCR1;CCR2;CD55;CD59;CDA;CDC123;CDC42EP3;CDH2;CDK14;CDK4;CDKL5;CENPV;CEP63;CHRNA10;CIR1;CLEC1A;CLMN;CNTNAP3;COMM

AIP2;WDFY3

331;SEC24D;SMAGP;VAMP3;WLS

DPYD;GMPR2;GNAQ;GSK3B;HMGCN;IDH1;IQGAP1;NMNAT2;NT5C2;NUDT5;OXER1;PANK2;PAPSS2;PDE4B;PDZD3;PNP;RAB1A;RAB31;TGM

HIF1A;HMGCN;HPSE;IL1B;IL1RN;IRAK3;LITAF;LYN;NPTN;OSM;PAK2;PELI2;PPAP2B;PROK2;PVRL2;RASGRP4;RNF111;SCARF1;SDCBP;SECTM1;STK3;TLR2;TLR4;TLR5;TNFRSF1A;UIMC1;WAC;WLS;WNT10B;ZAI

MD7;CXCR1;DGAT2;DNAJB11;DNAJC3;EDEM2;FCGR1A;FCGR1B;FOXO3;GPR17;GSK3B;HAS1;HIF1A;HMGCN;HSPA6;IDH1;IFNAR1;IFNGR2;IL1B;IL1R1;IL1RN;INHBB;IRAK3;KLF6;KPNA1;KPNA4;LITAF;LYN;MME;MYO5A;NFE2L2;NPTN;NUP50;NUPL1;PDCD7;PDE4B;PDK3;PHB;PIAS1;PTPRE;RAB31;RNF111;SLC

15;FGF13;GNAQ;GPM2;IQGAP1;KAL1;NAIP;PAK2;PDZD3;PPP1R3B;PPP4R1;RANBP1;RAGGEF2;RASGRP4;RHOH;ROPN1L;SBF2;SERPINB1;SOCS3;SOS2;STK3;TBC1D30;TIAM2;TNFSF14;TRIB

;CCR1;CCR2;CD55;CD59;CDC123;CDH2;CDK4;CDKL5;CENPV;CR1;CSRNP1;CUL3;DNAJB11;DNAJC3;E2F3;ETS2;FCGR1A;FGF13;FOXO3;FPR1;FYP;GPR89A;GSK3B;GTSE1;HCAR2;HEY1;HIF1A;HMGCN;HP;HPSE;IFNAR1;IL1B;IL1RN;INHBB;IQGAP1;IRAK3;ITM2B;JHDM1D;KCNE1;KLF6;KPNA1;LIMD1;LITAF;LMO4;L  
;TRIB1

D30;TIAM2

P4R1;PTPRE;SBF2

3;DOCK1;DOCK4;FGF13;FPR1;GNAQ;GSK3B;HMGCN;IL1B;IL1RN;IQGAP1;IRAK3;LYN;NPTN;OSM;OXER1;PAK2;PDK3;PDZD3;PELI2;PPAP2B;PROK2;RHOH;SDCBP;SOCS3;STK3;TARBP2;TLR4;TMEM132D;TNFRSF1A;TPX2;TRIB1;ZA

IRAK3;LIMD1;LYN;PHB;PTPRE;RHOH;SOCS3;STK3;TARBP2;TLR4;TNFRSF1A;TNFSF14;TRIB1;UBR2;ZFP3  
LYN;MME;NPEPPS;OSM;PDK3;PLAU;RS1;SLC12A6;SLC8A1;SOD2;TLR4;TLR5;TNFRSF1A;TNFSF14;UIMC1;ZAI  
MARCKS;MYO5A;OSM;PNP;RAB27A;RAB31;SNAP23;STX12;STX3;SYN2;TLR2;TRIM9;VAMP3

IFRSF1A;WAC

;GMPR2;GNAQ;GSK3B;HMGCN;IQGAP1;NT5C2;OXER1;PANK2;PAPSS2;PDE4B;PDZD3;PNP;RAB1A;RAB31;TGM

N;PAK2;PDE4B;PGLYRP1;PLD1;PVRL2;SOD2;TARBP2;TLR2;TLR4;TNFRSF1A;TRIB

I;EXT1;FGF13;FPR1;FPR2;GSK3B;HAS1;HIF1A;HIST1H1T;IL1B;KAL1;KIAA0319;LIMD1;LYN;MYO10;MYO5A;NRD1;PAK2;PDE4B;PLAU;PLD1;PLXNC1;PPAP2B;PROK2;PVRL2;ROPN1L;SDCBP;SLC8A1;SOS2;TLR2;TREM1;TRIB1;ZSWIM

RAB31;SEC24D;SMAGP;VAMP3;WLS

2

N;MRV11;NFE2;NFE2L2;PAPSS2;PLAU;PPAP2B;RAB27A;SLC8A1;TLR4;TREM1;WNT10F



B;IRAK3;LILRB3;LYN;ORM1;ORM2;PAK2;PELI2;PGLYRP1;PIAS1;PNP;PTPRE;PVRL2;SIT1;SOCS3;TARBP2;TLR2;TLR4;TLR5;ZFP3

5;DOCK4;DOCK4;DPYD;EDEM2;EXT1;GALNT14;GNAQ;GSK3B;HAS1;HIF1A;HMGCRC;HPSE;IL1B;IQGAP1;ITM2B;KCNE1;LYVE1;NPL;OXER1;PANK2;PAPSS2;PDE4B;PDZD3;PFKFB4;PGLYRP1;PNP;RAB1A;RAB31;SEC24D;ST3GAL4;ST3GAL5;ST6GALNAC2;TGM  
TNFRSF1A;ZFP36  
;HEY1;HIVEP1;HMGCRC;HP;IL1B;INHBB;IQGAP1;IRAK3;ITM2B;LIMD1;LRRFIP1;LYN;NCOA2;NFIL3;NR6A1;PAK2;PDZD3;PHB;PIAS1;PPAP2B;RHOH;S100A11;SBNO2;SOCS3;TARBP2;TDRD9;TLE4;TNFRSF1A;TRIB1;TSHZ3;UBR2;UIMC1;WAC;WNT10B;ZFP36;ZNF217;ZNF43

3;DOCK1;DOCK4;FGF13;FPR1;GNAQ;GSK3B;HMGCRC;IL1B;IL1RN;IQGAP1;IRAK3;LYN;NPTN;OSM;OXER1;PAK2;PDZD3;PELI2;PPAP2B;PROK2;RHOH;SDCBP;SOCS3;STK3;TARBP2;TLR4;TMEM132D;TNFRSF1A;TPX2;TRIB1;ZAI  
;GNAQ;GSK3B;HMGCRC;IQGAP1;PANK2;PAPSS2;PNP;RAB1A;RAB31;TGM3

;PVRL2;RAB27A;SBNO2;TARBP2;TLR2;TLR4

5E;IDH1;INHBB;IRAK3;MXD1;NCF4;NCOA1;NCOA2;NR6A1;PTPRE;PVRL2;S100A11;SBF2;SDCBP;SH3GLB1;SOS2;STK3;TARBP2;TLR2;TRIM

2;CD59;CDC123;CDH2;CDK4;CDKL5;CENPV;CSRNP1;CUL3;DNAJB11;DNAJC3;E2F3;ETS2;FCGR1A;FGF13;FOXO3;FPR1;GPR89A;GSK3B;GTSE1;HCAR2;HEY1;HIF1A;HMGCRC;HP;HPSE;IL1B;IL1RN;INHBB;IQGAP1;ITM2B;JHDM1D;KCNE1;KLF6;LIMD1;LITAF;LMO4;LYN;MLLT11;MYO10;NCOA1;NCOA2;NFE2;NFE2I  
;CXCR1;DNAH14;DOCK1;DOCK4;FGF13;FPR1;FPR2;GSK3B;HAS1;HIF1A;HIST1H1T;IL1B;KAL1;KIAA0319;LIMD1;LYN;LYVE1;MYO5A;NRD1;PDE4B;PLAU;PPAP2B;ROPN1L;SDCBP;SLC8A1;TLR2;TREM1;TRIB1;WIPF1;ZSWIM1

2;STK3;TLR2;TNFSF14;WNT10B;ZAI

.NKRD6;ANTXR2;ANXA3;AP3B2;APAF1;APBB2;APH1B;APOA1BP;APOBEC3A;AQP9;ARHGAP19;ARHGAP19;ARHGAP19;ARL11;ARL4D;ARPCS;ARPCS;ARSB;ASAP1;ATF6;ATP11A;ATP2C2;ATP5G1;ATP6V1A;ATP7B;ATP9A;ATXN1;ATXN7;AVIL;AVL9;BCL2L11;BEND5;BEST1;BMX;BST1;C21orf59;C3AR1;CA4;CACNA1E;CAPN1  
NKRD6;ANTXR2;ANXA3;AP3B2;APAF1;APBB2;APH1B;APOA1BP;APOBEC3A;AQP9;ARHGAP19;ARHGAP19;ARHGAP19;ARL11;ARL4D;ARPCS;ARPCS;ARSB;ASAP1;ATF6;ATP11A;ATP2C2;ATP5G1;ATP6V1A;ATP7B;ATP9A;ATXN1;ATXN7;AVIL;AVL9;BCL2L11;BEND5;BEST1;BMX;BST1;C21orf59;C3AR1;CA4;CACNA1E;CAPN1

K3;SOD2;TLR2;TLR4;TNFRSF1A;TRIB1;WNT10E  
;BCL2L11;CA4;CDK4;COQ4;CYBB;DGAT2;DMXL2;DNAJC3;EBP;EDEM2;ELOVL5;EXT1;FCGR1A;FCGR1B;GABARAPL1;GALNT14;GIMAP1;GLIPR2;GNAQ;GOLGA7B;GPR89A;HMGCRC;HPSE;ITM2B;KAZN;KIAA0319;LAMP2;LBR;LITAF;LMNB1;LYN;MBOAT2;MRV1;NMNAT2;NUP50;NUPL1;OSBPL1A;PGS1;PHB;PICAI  
;IQGAP1;LYVE1;NPL;PDE4B;PGLYRP1;PNP;RAB1A;RAB31;TGM2

QGAP1;IRAK3;LYN;NPTN;OSM;PAK2;PELI2;PPAP2B;PROK2;RHOH;SDCBP;SOCS3;STK3;TARBP2;TLR4;TNFRSF1A;TPX2;TRIB1;ZAI  
B;HMGCRC;IL1B;IL1RN;INPP5A;IQGAP1;IRAK3;LIMD1;LYN;MAK;NPTN;OSM;PAK2;PDK3;PELI2;PPAP2B;PPP4R1;PROK2;PTPRE;RHOH;SDCBP;SOCS3;SRPK1;SRPK2;STK3;TARBP2;TLR2;TLR4;TNFRSF1A;TPX2;TRIB1;ZAI

FK3;TLR2;TNFSF14;WNT10B;ZAI

IBP1;RAPGEF2;STK3;TBC1D30;TIAM2

RASGRP4;RHOH;SBF2;SOS2;TBC1D30;TIAM2

D;SH3GLB1;ST3GAL4;ST3GAL5;ST6GALNAC2;STX12;STX6;TNFRSF1A;WLI

RASGRP4;RHOH;SBF2;SOS2;TBC1D30;TIAM2  
A;PLD1;RAB27A;RAB31;STX12;STX6;TLR4;TM9SF2;VAMP2

APAF1;APH1B;APOA1BP;ARHGAP19;ARSB;ATF6;ATP11A;ATP2C2;ATP5G1;ATP6V1A;ATP7B;ATP9A;AVL9;BCL2L11;BEND5;BEST1;BMX;C21orf59;CA4;CAPN8;CBS;CCR2;CCT4;CDA;CDK14;CDK4;CDKL5;CEP63;COQ4;CUL3;CYBB;DCTPP1;DGAT2;DMXL2;DNAH14;DNAJB11;DNAJC3;DOCK1;DOCK4;DPYD;EBP;ECI

144;TMCO3  
L2;S100A11;SBF2;SDCBP;SH3GLB1;TARBP2;TRIM9

4D;STX6;TARBP2;TLR4

4;FAM65B;FGF13;FRMD4B;GSK3B;IQGAP1;KPNA1;LRRC6;LYN;MAK;MME;MYO10;MYO5A;NEDD9;PDZD3;RAB27A;ROPN1L;S100A11;SLC8A1;SNAP23;STX3;TIAM2;TNFRSF1A;TRIM9;TRPM6;TSHZ3;VAMP

.K;PARD3;PDE5A;PDGFA;PDGFRA;PF4;PPBP;PRKAR2B;PROS1;SELP;SERPINE1;SLC8A3;SPARC;TFPI;TPM1;TREML1;VEGFC;VIL1;VW  
5A;PDGFA;PDGFRA;PF4;PPBP;PRKAR2B;PROS1;SELP;SERPINE1;SLC8A3;SPARC;TFPI;TREML1;VEGFC;VWI  
5A;PDGFA;PDGFRA;PF4;PPBP;PRKAR2B;PROS1;SELP;SERPINE1;SLC8A3;SPARC;TFPI;TREML1;VEGFC;VWI  
5A;PDGFA;PDGFRA;PF4;PPBP;PRKAR2B;PROS1;SELP;SERPINE1;SLC8A3;SPARC;TFPI;TREML1;VEGFC;VWI  
;SERPINE1;SPARC;TREML1;VEGFC;VWF

5A;PDGFA;PDGFRA;PF4;PPBP;PRKAR2B;PROS1;SELP;SERPINE1;SLC8A3;SPARC;TFPI;TREML1;VEGFC;VWI  
V1;MYLK;PARD3;PDE5A;PDGFA;PDGFRA;PF4;PPBP;PRKAR2B;PROS1;PTGES;SELP;SERPINE1;SLC8A3;SPARC;TFPI;TNFSF4;TPM1;TREML1;VEGFC;VIL1;VW

EML1;VEGFC;VWF

;VWF  
;PPBP;PROS1;SELP;SERPINE1;SPARC;TNFSF4;TREML1;VEGFC;VWI  
;GUCY1B3;HOMER2;ITGA2B;ITGB3;LTBP1;MAP1B;MGLL;MMRN1;PCSK6;PDE5A;PDGFA;PDGFRA;PF4;PPBP;PRKAR2B;PROS1;PTGS1;SELP;SERPINE1;SH3TC2;SLC6A4;SLC8A3;SPARC;SYTL4;TFPI;TPM1;TREML1;VEGFC;VIL1;VWF;WASF  
;S1;SELP;SERPINE1;SPARC;SYTL4;TNFSF4;VEGFC;VWF  
;PROS1;SELP;SERPINE1;SPARC;SYTL4;TNFSF4;VEGFC;VWF  
MF  
B3;HIST1H2BJ;ITGA2B;ITGB3;MGLL;MMRN1;MYLK;PARD3;PDE5A;PDGFA;PDGFRA;PDLIM1;PF4;PLOD2;PPBP;PRKAR2B;PROS1;PTGES;PTGS1;SELP;SERPINE1;SLC6A4;SLC8A3;SPARC;TFPI;TGFB11;TNFSF4;TPM1;TREML1;VEGFC;VIL1;VW

ELP;SERPINE1;SPARC;STON2;SYTL4;VEGFC;VWF  
LP;SERPINE1;SPARC;SYTL4;TREML1;VEGFC;VWF  
;AM;F2RL3;GF1B;GP6;GP9;GRB14;GUCY1A3;GUCY1B3;HOMER2;ITGA2B;ITGB3;ITGB5;KCND3;MAP1B;MEIS1;MGLL;MMRN1;MYL9;MYLK;NAT8B;NRGN;PARD3;PCSK6;PCYT1B;PDE5A;PDGFA;PDGFRA;PEAR1;PF4;PGRMC1;PLXNB3;PPBP;PRKAR2B;PROS1;PTGS1;RGS6;SDC4;SELP;SERPINE1;SH3TC2;SLC6A4;S  
SELP;SERPINE1;SPARC;SYTL4;TREML1;VEGFC;VWF  
CLEC1B;CLU;CMTM5;CXCL5;EGF;ESAM;F2RL3;FSTL1;GNAZ;GNG11;GP6;GP9;GRB14;GRK5;GUCY1A3;GUCY1B3;HIST1H2BJ;HOMER2;ITGA2B;ITGB3;ITGB5;LTBP1;MAOB;MGLL;MMRN1;MYL9;MYLK;NRGN;PARD3;PCSK6;PDE5A;PDGFA;PDGFRA;PDLIM1;PF4;PF4V1;PGRMC1;PKHD1L1;PLOD2;PLXNB3;PPBP;PR  
;PINE1;SPARC;SYTL4;TREML1;VEGFC;VWF  
;AB6B;SELP;SERPINE1;SPARC;SYTL4;TREML1;VEGFC;VWF  
;CD9;CDK2AP1;CDKN1A;CLDN5;CLEC1B;CLU;CXCL5;DNM3;EGF;ESAM;F2RL3;FSTL1;GF1B;GNAZ;GNG11;GP6;GP9;GRB14;GRK5;GUCY1A3;GUCY1B3;HIST1H2AG;HIST1H2BH;HIST1H2BJ;HOMER2;HRASL5;ITGA2B;ITGB3;ITGB5;KCND3;LTBP1;MAOB;MAP1B;MEIS1;MGLL;MMD;MMRN1;MYL9;MYLK;NRGN;PA  
N;EGF;ESAM;F2RL3;GNAZ;GNG11;GP6;GP9;GRB14;GRK5;HOMER2;ITGA2B;ITGB3;ITGB5;KCND3;LY6G6F;MAP1B;MFAP3L;MGLL;MMD;MYLK;PARD3;PDGFA;PEAR1;PLXNB3;PRKAR2B;RGS6;RHOBTB1;SDC4;SDPR;SELP;SERPINE1;SH3TC2;SLC2A3;SLC6A4;SLC8A3;SYTL4;TFPI;TNFSF4;TPM1;TREML1;TSPAN9  
;ESAM;F2RL3;GNAZ;GNG11;GP6;GP9;GRB14;GRK5;HOMER2;ITGA2B;ITGB3;ITGB5;KCND3;LY6G6F;MAP1B;MFAP3L;MGLL;MMD;MYLK;PARD3;PDGFA;PEAR1;PLXNB3;PRKAR2B;RGS6;RHOBTB1;SDC4;SDPR;SELP;SERPINE1;SH3TC2;SLC2A3;SLC6A4;SLC8A3;SYTL4;TFPI;TNFSF4;TPM1;TREML1;TSPAN9;TUBB  
;AM;F2RL3;GF1B;GP6;GP9;GRB14;GUCY1A3;GUCY1B3;HOMER2;ITGA2B;ITGB3;ITGB5;KCND3;MAP1B;MEIS1;MGLL;MMRN1;MYL9;MYLK;NAT8B;NRGN;PARD3;PCSK6;PCYT1B;PDE5A;PDGFA;PDGFRA;PEAR1;PF4;PGRMC1;PLXNB3;PPBP;PRKAR2B;PROS1;PTGS1;RGS6;SDC4;SELP;SERPINE1;SH3TC2;SLC6A4;S  
11;HOMER2;ITGA2B;ITGB3;LTBP1;MAOB;MYL9;PARD3;PDGFA;PDGFRA;PF4;PGRMC1;PLXNB3;PPBP;PRKAR2B;PTGES;PTGS1;SELP;SERPINE1;SLC6A4;SLC8A3;SMOX;SPARC;TGFB11;TNFSF4;TPM1;VEGFC;VIL  
C2L;CLU;CMTM5;EGF;ELOVL7;ESAM;F2RL3;FAM26E;GNAZ;GNG11;GP6;GP9;GRB14;GRK5;HOMER2;HRASL5;ITGA2B;ITGB3;ITGB5;KCND3;LY6G6F;MAOB;MAP1B;MFAP3L;MGLL;MMD;MYLK;NAT8B;PARD3;PCSK6;PCYT1B;PDGFA;PDGFRA;PEAR1;PGRMC1;PKHD1L1;PLOD2;PLXNB3;PRKAR2B;PROS1;PTCRA;F  
;RA;PF4;PGRMC1;PLXNB3;PPBP;PROS1;SELP;SERPINE1;TPM1;VEGFC;VIL1

;CD9;CDK2AP1;CDKN1A;CLDN5;CLEC1B;CLU;CXCL5;DNM3;EGF;ESAM;F2RL3;FSTL1;GF1B;GNAZ;GNG11;GP6;GP9;GRB14;GRK5;GUCY1A3;GUCY1B3;HIST1H2AG;HIST1H2BH;HIST1H2BJ;HOMER2;HRASL5;ITGA2B;ITGB3;ITGB5;KCND3;LTBP1;MAOB;MAP1B;MEIS1;MGLL;MMD;MMRN1;MYL9;MYLK;NAT8B;NI  
PDGFA;PF4;PPBP;PRKAR2B;PROS1;RAB6B;SELP;SERPINE1;SLC8A3;SPARC;STON2;SYTL4;TNFSF4;TOM1L1;VEGFC;VWI

;PRKAR2B;SERPINE1;SLC6A4;SLC8A3;SPARC;TGFB11;TNFSF4;VIL1  
F;F2RL3;FSTL1;GNAZ;GNG11;GP6;GRB14;GRK5;GUCY1A3;GUCY1B3;HOMER2;ITGA2B;ITGB3;ITGB5;KCND3;LTBP1;MAOB;MGLL;NRGN;PARD3;PCSK6;PDE5A;PDGFA;PDGFRA;PF4;PLXNB3;PRKAR2B;PTGES;RAB6B;RGS6;RHOBTB1;SELP;SERPINE1;SH3TC2;SLC6A4;SLC8A3;SPARC;SYTL4;TGFB11;TNFSF4;TREM

F;F2RL3;FSTL1;GNAZ;GNG11;GP6;GRB14;GRK5;GUCY1A3;GUCY1B3;HOMER2;ITGA2B;ITGB3;ITGB5;KCN2D3;LTBP1;MAOB;MGLL;NRGN;PARD3;PCSK6;PDE5A;PDGFA;PDGFRA;PF4;PLXNB3;PRKAR2B;PTGES;RAB6B;RGS6;RHOBTB1;SELP;SERPINE1;SH3TC2;SLC6A4;SPARC;SYTL4;TGFB111;TNFSF4;TREML1;VEGF  
F;F2RL3;FSTL1;GNAZ;GNG11;GP6;GRB14;GRK5;GUCY1A3;GUCY1B3;HOMER2;ITGA2B;ITGB3;ITGB5;KCN2D3;LTBP1;MAOB;MGLL;NRGN;PARD3;PCSK6;PDE5A;PDGFA;PDGFRA;PF4;PLXNB3;PRKAR2B;PTGES;RAB6B;RGS6;RHOBTB1;SELP;SERPINE1;SH3TC2;SLC6A4;SPARC;SYTL4;TGFB111;TNFSF4;TREML1;VEGF

A3;SPARC;TNFSF4;TPM1  
I;SERPINE1;SLC6A4;SPARC;TGFB111;TNFSF4;TSC22D1;VEGFC

1B;MMRN1;MYLK;PARD3;PCSK6;PDGFA;PEAR1;PF4;PPBP;PRKAR2B;PROS1;RAB6B;SELP;SERPINE1;SLC24A3;SLC35D3;SLC6A4;SLC8A3;SPARC;SYTL4;TNFSF4;VEGFC;VWI  
I;GP6;GRB14;ITGA2B;ITGB3;KCN2D3;LTBP1;MAOB;MAP1B;MMRN1;MYLK;PARD3;PCSK6;PDGFA;PDGFRA;PEAR1;PF4;PPBP;PRKAR2B;PROS1;RAB6B;SELP;SERPINE1;SLC24A3;SLC35D3;SLC6A4;SLC8A3;SPARC;STON2;SYTL4;TNFSF4;TOM1L1;TPM1;VEGFC;VIL1;VW  
FSF4;VEGFC  
LP;SERPINE1;TPM1;TUBA8;TUBB1;VEGFC;VIL1  
4V1;PPBP;SERPINE1;TGFB111;TNFSF4;VEGFC;VWF  
PDGFA;PF4;PPBP;PRKAR2B;PROS1;RAB6B;SELP;SERPINE1;SLC8A3;SPARC;STON2;SYTL4;TNFSF4;TOM1L1;VEGFC;VWI

3D3;PDGFA;PDGFRA;PF4;PRKAR2B;PTGES;SELP;SERPINE1;SLC6A4;SLC8A3;SPARC;TGFB111;TNFSF4;VEGFC;VIL1

;PPBP;PROS1;SELP;SERPINE1;SLC6A4;SPARC;TNFSF4;VEGFC

;KCN2D3;MAOB;MAP1B;MMRN1;MYLK;PARD3;PCSK6;PDGFA;PEAR1;PF4;PPBP;PRKAR2B;PROS1;RAB6B;SELP;SERPINE1;SLC24A3;SLC35D3;SLC6A4;SLC8A3;SPARC;STON2;SYTL4;TNFSF4;TOM1L1;VEGFC;VW

KAR2B;SELP;SERPINE1;STON2;SYTL4;TNFSF4;TPM1;VEGFC;VIL1

/EGFC;VIL1  
;KCN2D3;MAOB;MAP1B;MMRN1;MYLK;PARD3;PCSK6;PDGFA;PEAR1;PF4;PPBP;PRKAR2B;PROS1;RAB6B;SELP;SERPINE1;SLC24A3;SLC35D3;SLC6A4;SLC8A3;SPARC;STON2;SYTL4;TNFSF4;TOM1L1;VEGFC;VW

;MMD;PDGFRA;PEAR1;RGS6;SDC4;SDPR;SELP;SLC6A4;TNFSF4;TPM1;TSPAN9;VSI2;VWF

11;VEGFC;VIL1

RA;PF4;PROS1;RGS6;SELP;SERPINE1;SLC6A4;TGFB111;TNFSF4;TPM1;VEGFC;VIL1;WASF1

C4;SELP;SLC6A4;TNFSF4;TSPAN9;VSI2

FPI;TNFSF4;VEGFC;VWF

L1;GNAZ;GNG11;GP6;GRB14;GRK5;GUCY1A3;GUCY1B3;HOMER2;ITGA2B;ITGB3;ITGB5;LTBP1;MAOB;MGLL;MYLK;NRGN;PARD3;PCSK6;PDE5A;PDGFA;PDGFRA;PF4;PLXNB3;PRKAR2B;PTGES;PTGS1;RAB6B;RGS6;RHOBTB1;SELP;SERPINE1;SLC6A4;SLC8A3;SMOX;SPARC;TGFB111;TNFSF4;TPM1;TREML1;VEGF

/EGFC;VIL1  
/EGFC;VIL1

;GNG11;GP6;GRB14;GRK5;GUCY1A3;GUCY1B3;HOMER2;ITGA2B;ITGB3;ITGB5;LTBP1;MGLL;NRGN;PARD3;PCSK6;PDE5A;PDGFA;PDGFRA;PF4;PLXNB3;PRKAR2B;PTGES;RAB6B;RGS6;RHOBTB1;SELP;SERPINE1;SPARC;TGFB111;TNFSF4;TREML1;VEGFC;VIL  
C4;SELP;SLC6A4;TNFSF4;TSPAN9;VSI2

;F2RL3;FAM26E;GNAZ;GNG11;GP6;GP9;HRASL5;ITGA2B;ITGB3;ITGB5;KCND3;LY6G6F;MAOB;MFAP3L;MGLL;MMD;NAT88;PCYT1B;PDGFRA;PEAR1;PGRMC1;PKHD1L1;PLOC2;PLXNB3;PRKAR2B;PROS1;PTCRA;PTGES;PTGS1;RGS6;SDC4;SDPR;SEC14L5;SELP;SLC24A3;SLC35D3;SLC6A4;SLC8A3;ST7;STON2;SYT  
B111;TPM1;VWF  
B111;TPM1;VWF

;K6;PDGFA;PF4;PF4V1;PKHD1L1;PPBP;PROS1;SDC4;SELP;SERPINE1;SPARC;TFPI;TNFSF4;VEGFC;VW

VIL1

;PDE5A;PDGFA;PDGFRA;PRKAR2B;RGS6;RHOBTB1;SELP;SERPINE1;SLC6A4;SYTL4;TGFB111;VEGFC;WASF3

;PDE5A;PDGFA;PDGFRA;PRKAR2B;RGS6;RHOBTB1;SELP;SERPINE1;SLC6A4;SYTL4;TGFB111;VEGFC;WASF3  
;PTGS1;SERPINE1;SLC6A4;SPARC;TGFB111;TNFSF4;TSC22D1;VEGFC

;GFRA;SLC6A4;VIL1;VWF

;LEC1B;CLU;CXCL5;EGF;ESAM;F2RL3;FSTL1;GF1B;GNAZ;GNG11;GP6;GP9;GRB14;GRK5;GUCY1A3;GUCY1B3;HOMER2;ITGA2B;ITGB3;ITGB5;LTBP1;MAOB;MAP1B;MEIS1;MGLL;MMRN1;MYL9;MYLK;NRGN;PARD3;PCSK6;PDE5A;PDGFA;PDGFRA;PDLIM1;PF4;PLXNB3;PPBP;PRKAR2B;PROS1;PTCRA;PTGES;PTI

MTM5;CTTN;CXCL5;DNM3;EGF;ELOVL7;ENKUR;GF1B;GNAZ;GP6;GRB14;GRK5;GUCY1B3;HIST1H2AG;HIST1H2BH;HIST1H2BJ;HOMER2;ITGA2B;ITGB3;ITGB5;LTBP1;MAOB;MAP1B;MEIS1;MGLL;MYLK;NRGN;PARD3;PCSK6;PDGFA;PDGFRA;PF4;PF4V1;PGRMC1;PLXNB3;PPBP;PRKAR2B;PTCRA;RGS6;SDC4;SD

;N1A;CLU;CTTN;DNM3;EGF;ELOVL7;GNAZ;GRB14;GUCY1A3;GUCY1B3;HRASL5;ITGA2B;ITGB3;ITGB5;MAOB;MAP1B;MGLL;MMD;MMRN1;MYL9;MYLK;PARD3;PCSK6;PCYT1B;PDE5A;PDGFA;PF4;PGRMC1;PKHD1L1;PLOC2;PPBP;PRKAR2B;PROS1;PTGES;PTGS1;RAB6B;RHOBTB1;SDC4;SDPR;SELP;SERPINE1;SF  
ERPINE1;SLC6A4;SLC8A3;SMOX;SPARC;TGFB111;TNFSF4;TPM1;VEGFC;VIL1

;SELP;SLC6A4;TPM1;TUBA8;TUBB1;VIL1;VWF;WASF3

TNFSF4;VEGFC  
6;SH3TC2;SLC6A4;TGFB111;TPM1;VEGFC;WASF  
MYLK;NAT8B;PARD3;PCSK6;PCYT1B;PDE5A;PDGFA;PDGFRA;PF4;PGRMC1;PLXNB3;RGS6;SERPINE1;SH3TC2;SLC6A4;SLC8A3;SPARC;TGFB111;TNFSF4;TPM1;VEGFC;VIL1;VWF;WASF

MEIS1;MYL9;MYLK;NAT8B;NRGN;PARD3;PCSK6;PCYT1B;PDE5A;PDGFA;PDGFRA;PF4;PGRMC1;PLXNB3;RGS6;SDC4;SERPINE1;SH3TC2;SLC6A4;SLC8A3;SPARC;TGFB111;TNFSF4;TPM1;VEGFC;VIL1;VWF;WASF

1;VWF;WASF3  
GB5;LTBP1;MGLL;PARD3;PCSK6;PDGFA;PDGFRA;PF4;PRKAR2B;RGS6;SERPINE1;TGFB111;VEGFC;VIL1

;MYLK;PDE5A;PRKAR2B;PTGS1;SH3TC2;SLC6A4;TPM1;VEGFC;WASF

GRMC1;PLXNB3;RGS6;SH3TC2;SLC6A4;SLC8A3;VEGFC;WASF  
GB5;MAP1B;MEIS1;MYL9;MYLK;NAT8B;NRGN;PARD3;PCSK6;PCYT1B;PDGFA;PDGFRA;PF4;PGRMC1;PLXNB3;RGS6;SDC4;SERPINE1;SH3TC2;SLC6A4;SLC8A3;SPARC;TGFB111;TNFSF4;TPM1;VEGFC;VWF;WASF

;MAP1B;MYLK;PDE5A;PDGFA;PDGFRA;PF4;PPBP;PRKAR2B;RGS6;SDC4;SELP;SERPINE1;SLC6A4;SYTL4;TGFB111;TNFSF4;TPM1;TSC22D1;VEGFC;VIL1;WASF

3;TPM1;VIL1;WASF3  
L;MAOB;MAP1B;MEIS1;MGLL;PCSK6;PDE5A;PDGFA;PDGFRA;PF4;PROS1;PTCRA;PTGES;RGS6;SERPINE1;SLC6A4;SYTL4;TGFB111;TNFSF4;TPM1;TSC22D1;VIL

3;SPARC;TGFB111;TNFSF4;VEGFC;VIL1  
MYL9;MYLK;NRGN;PARD3;PCYT1B;PDGFA;PDGFRA;PF4;PGRMC1;PLXNB3;RGS6;SDC4;SERPINE1;SH3TC2;SLC6A4;SLC8A3;SPARC;TGFB111;TNFSF4;TPM1;VEGFC;VWF;WASF

FRA;PF4;PGRMC1;PLXNB3;SERPINE1;SLC6A4;TGFB111;TPM1;VEGFC;VIL1;WASF  
3;TGFB111;TPM1;VIL1;WASF3

IP5;CALD1;CAV2;CCDC3;CD9;CDK2AP1;CDKN1A;CLU;CTTN;DNM3;EGF;ELOVL7;GNAZ;GRB14;GRK5;GUCY1A3;GUCY1B3;HOMER2;HRASLS;ITGA2B;ITGB3;ITGB5;MAOB;MAP1B;MGLL;MMD;MMRN1;MYL9;MYLK;PARD3;PCSK6;PCYT1B;PDE5A;PDGFA;PDGFRA;PDLIM1;PF4;PGRMC1;PKHD1L1;PLOD2;PPBP;PR

2;CD9;CDK2AP1;CDKN1A;CLDN5;CLEC1B;CLEC2L;CLU;CMTM5;CTDSPL;CTTN;CXCL5;DNM3;EGF;ELOVL7;ENDOD1;ENKUR;FSTL1;FSTL4;GFI1B;GNAZ;GP6;GRB14;GRK5;GUCY1A3;GUCY1B3;HIST1H2AG;HIST1H2BH;HIST1H2BJ;HOMER2;ITGA2B;ITGB3;ITGB5;KCND3;LTBP1;MAOB;MAP1B;MEIS1;MGLL;MYL9;M1;PLOD2;PROS1;PTGES;PTGS1;RAB6B;SELP;SLC6A4;SYTL4  
51;PTGS1;TFPI;VWF

DGFRA;PF4;PF4V1;PLOD2;PRKAR2B;PTGES;RAB6B;RHOBTB1;SDPR;SELP;TUBA8;TUBB1;VIL1

3;FBXO7;FECH;FKBP1B;FTL;GATA1;GFAP;GLRX5;GPX1;GYPA;HBB;HBD;HBG1;HBG2;HBZ;HPS1;KCNH2;KEL;KLF1;KRT1;MXI1;MYL4;NEDD4L;PDE3A;PRDX5;RBM38;RHAG;RNF10;SGIP1;SLC25A37;SLC2A4;SLC4A1;SNCA;SOX6;SPTA1;TAL1;TESC;TGM2;TRIM10;UTS2R;YBX

ESC;TRIM10

KLF1;NEDD4L;PRDX5;RHAG;RNF10;SGIP1;SLC25A37;SLC2A4;SLC4A1;SNCA;SOX6;SPTA1;TAL1;TGM2;TRIM10;UTS2R  
TAL1;TESC;TRIM10  
ESC;TRIM10

CE;SEC14L4;SLC14A1;SLC25A37;SLC2A4;SLC38A5;SLC4A1;SLC6A19;SLC6A8;SLC6A9;XX

SPTA1;VIPR2  
SLC2A4;SLC38A5;SLC4A1;SLC6A19;SLC6A8;SLC6A9

12;SLC4A1;SOX6;SPTA1;TAL1;TESC

A;TGM2;UTS2F

Q1;HBZ;HMBS;JGF2BP2;MYL4;NEDD4L;OAZ1;ODC1;PDE3A;PPM1A;PRDX5;PRDX6;RAP1GAP;RBM38;RHOV;RPL3L;SELENBP1;SHARPIN;SIAH2;SNCA;SPTA1;STRADB;TMOD1;UBA52;UBI

9A

1;KRT1;LGALS3;LYL1;PBX1;POLL;RAG1;RILP;SFRP2;SNCA;SOX6;SPTA1;TAL1;TESC;TRIM10;UBA52;UBI

4;SLC4A1;SNCA;TGM2;UTS2F  
;M2;UTS2R

;KCNH2;MARCH2;MFSD2B;MRC2;MXI1;NEDD4L;NUDT4;OSBP2;RAB3IL1;RHAG;RILP;RPL3L;SELENBP1;SFRP2;SGIP1;SLC14A1;SLC25A37;SLC25A39;SLC2A4;SLC38A5;SLC4A1;SLC6A19;SLC6A8;SLC6A9;SNCA;STRADB;STX2;TESC;TGM2;TSPO2;UBA52;UBB;UTS2R;VTI1B;X

;KCNH2;MARCH2;MFSD2B;MRC2;MXI1;NEDD4L;NUDT4;OSBP2;RAB3IL1;RHAG;RILP;RPL3L;SELENBP1;SFRP2;SGIP1;SLC14A1;SLC25A37;SLC25A39;SLC2A4;SLC38A5;SLC4A1;SLC6A19;SLC6A8;SLC6A9;SNCA;STRADB;STX2;TESC;TGM2;TSPO2;UBA52;UBB;UTS2R;VTI1B;X

BZ;HPS1;KLF1;KRT1;LYL1;MBNL3;MEF2B;MYL4;ODC1;PBX1;RAG1;RBM38;SFRP2;SHARPIN;SIM2;SOX6;SPTA1;STX2;TAL1;TESC;TGM2;TRIM10;WNT9;  
;ILP;RPL3L;SELENBP1;SFRP2;SLC14A1;SLC2A4;SLC38A5;SLC4A1;SLC6A19;SLC6A8;SNCA;STRADB;STX2;TESC;UBA52;VTI1B;X

YL4;PBX1;PDE3A;PRDX5;RBM38;RNF10;SFRP2;SGIP1;SNCA;SOX6;TAL1;TESC;UBA52;UBB;UTS2R;WNT9A

);TESC



;KCNH2;MXI1;NEDD4L;OSBP2;RHAG;RILP;RPL3L;SFRP2;SLC14A1;SLC25A37;SLC2A4;SLC38A5;SLC4A1;SLC6A19;SLC6A8;SLC6A9;SNCA;STRADB;STX2;TESC;TGM2;UBA52;UBB;UTS2R;VTI1B;XI

I;HMBS;MYL4;NT5M;OAZ1;ODC1;PDE3A;PRDX5;RAP1GAP;SLC25A39;SLC6A8;SNCA;SPTA1;VIPR2

JBB

CTSE;DARC;DPM2;E2F2;ECSIT;EHD2;EPB42;EPB49;ESPN;FBXO17;FBXO7;FBXO9;FECH;FHL2;FKBP1B;FKBP8;FTL;GATA1;GFAP;GPX1;GSPT1;GYPA;GYPC;HBA2;HBB;HEMGN;HEPACAM2;HPS1;IGF2BP2;ITLN1;KANK2;KCNH2;KEL;KLC3;KRT1;LGALS3;LYL1;MEF2B;MXI1;MYL4;NEDD4L;PBX1;PLVAP;PPM1A;PRDX

of78;CA1;CDC34;CHPT1;CR1L;CSDA;CTSE;DCAF12;DPM2;ECSIT;EHD2;EMID1;EPB42;EPB49;ESPN;FBXO7;FBXO9;FECH;FHL2;FKBP1B;FKBP8;FTL;GALNT5;GCAT;GFAP;GLRX5;GMPR;GPX1;GUK1;GYPC;HAGH;HBA2;HBB;HBD;HBG1;HBG2;HBM;HBQ1;HBZ;HEPACAM2;HMBS;HPS1;IFI27;IGF2BP2;KANK2;KCNH2

CSIT;EHD2;EPB42;ESPN;FECH;FHL2;FKBP1B;GATA1;GFAP;GLRX5;GPX1;HBB;HBD;HBG1;HBG2;HBZ;HEMGN;HPS1;IGF2BP2;KCNH2;KEL;KLF1;KRT1;LGALS3;LYL1;MBNL3;MEF2B;MYL4;NEDD4L;ODC1;PBX1;PDE3A;POLL;PRDX5;RAG1;RBM38;RNF10;SFRP2;SGIP1;SHARPIN;SIAH2;SIM2;SLC6A8;SNCA;SOX6;SPTA

A;STRADB;TGM2;UBA52;UBB;WNT9A

LC2A4;SNCA;SOX6;STRADB;TESC;TFDP1;UBA52;UBB;WNT9A

A1;SLC6A19;SLC6A8;SLC6A9

RDX5;PRDX6;PTPRN;SHARPIN;SLC2A4;SNCA;SOX6;STRADB;TESC;TFDP1;UBA52;UBB;WNT9A

KANK2;MBNL3;MXI1;NEDD4L;NFIX;PBX1;PDE3A;PPM1A;PRDX5;RAG1;RBM38;RNF10;SESN3;SFRP2;SIAH2;SIM2;SNCA;SOX6;SPTA1;STRADB;TAL1;TESC;UBA52;UBB;VIPR2;WNT9A;YBX:

ST2;BPGM;CA1;CDC34;CHPT1;CNN1;CSDA;CTSE;DARC;DPCD;DYRK3;E2F2;ECSIT;EHD2;EPB42;EPB49;ESPN;FAM107A;FBXO7;FBXO9;FECH;FHL2;FKBP18;FKBP8;FTL;GATA1;GFAP;GLRX5;GPX1;GSPT1;GYPA;HBA2;HBB;HBD;HBG1;HBG2;HBQ1;HBZ;HEMGN;HEPACAM2;HPS1;IFI27;IGF2BP2;ITLN1;KANK2;KCNH

KANK2;KRT1;MBNL3;MXI1;NEDD4L;NFIX;PBX1;PDE3A;PPM1A;PRDX5;RAG1;RBM38;RNF10;SESN3;SFRP2;SHARPIN;SIAH2;SIM2;SNCA;SOX6;SPTA1;STRADB;TAL1;TESC;UBA52;UBB;UTS2R;VIPR2;WNT9A;YBX:

X1

3;SNCA;TESC;XK

;RAG1;SFRP2;SHARPIN;SIAH2;SNCA;STRADB;TGM2;TSTA3;UBA52;UBB;WNT9A

;RAG1;SFRP2;SHARPIN;SIAH2;SNCA;STRADB;TGM2;TSTA3;UBA52;UBB;WNT9A

TESC;TFDP1;UBA52;UBB;VIPR2

RX5;GPX1;HBZ;HPS1;KLF1;KRT1;LYL1;MBNL3;MEF2B;MYL4;ODC1;PBX1;PDE3A;RAG1;RBM38;RNF10;SFRP2;SHARPIN;SIAH2;SIM2;SNCA;SOX6;SPTA1;STRADB;STX2;TAL1;TESC;TGM2;TMOD1;TRIM10;UTS2R;WNT9A;YBX

VRB;C5orf4;C9orf3;CA1;CDC34;CHPT1;CNN1;CSDA;CTSE;DARC;DPM2;DYRK3;E2F2;ECSIT;EHD2;EPB42;EPB49;ESPN;FBXO17;FBXO7;FBXO9;FECH;FHL2;FKBP1B;FKBP8;FTL;GATA1;GCAT;GFAP;GLRX5;GMPR;GPX1;GSPT1;GUK1;GYPA;GYPC;HAGH;HBA2;HBB;HBD;HBG1;HBG2;HBM;HBQ1;HBZ;HEMGN;HEPAC

LC6A8;SLC6A9;SPTA1;TMPRSS9;TSPAN7;VIPR2

orf77;C1orf116;C5orf4;CHPT1;CR1L;DARC;DPM2;EHD2;EPB42;EPB49;FECH;FKBP1B;FKBP8;GALNT5;GATA1;GFAP;GPR146;GYPA;GYPB;GYPC;HEPACAM2;HPS1;IFI27;ITLN1;KCNH2;KEL;KRT1;LGALS3;MARCH2;MFS2D2;MRC2;OR2W3;OSBP2;PAQR9;PDE3A;PDZK1P1;PLEK2;PLVAP;PTPRF;PTPRN;RAP1GAP;RPB42;EPB49;FECH;FHL2;FKBP1B;FKBP8;FTL;GALNT5;GCAT;GFAP;GLRX5;GMPR;GPX1;GUK1;GYPC;HAGH;HBA2;HBB;HBD;HBG1;HBG2;HBM;HBQ1;HBZ;HEPACAM2;HMSB;HPS1;IFI27;IGF2BP2;KANK2;LGALS3;MARCH2;MBNL3;MYL4;NEDD4L;NTS5;OAZ1;ODC1;PDE3A;PLVAP;PPM1A;PRDX5;PRDX6;RAP1GAI  
CD3;S1PR1;SCML4;SERTAD3;SRSF1;STAT4;TARBP1;TBGR1;TRAF5;UPF3A;ZBTB24;ZFP28;ZMYND15;ZNF234;ZNF251;ZNF331;ZNF514;ZNF528;ZNF548;ZNF585B;ZNF841;ZNF850;ZNF88  
CD3;S1PR1;SCML4;SERTAD3;SRSF1;STAT4;TARBP1;TBGR1;TRAF5;UPF3A;ZBTB24;ZFP28;ZMYND15;ZNF234;ZNF251;ZNF331;ZNF514;ZNF528;ZNF548;ZNF585B;ZNF841;ZNF850;ZNF88  
IGL;PTCD3;S1PR1;SCML4;SERTAD3;SLC11A2;SRSF1;STAT4;TARBP1;TBGR1;TRAF5;UPF3A;ZBTB24;ZFP28;ZMYND15;ZNF234;ZNF251;ZNF331;ZNF514;ZNF528;ZNF548;ZNF585B;ZNF841;ZNF850;ZNF88  
L;SCML4;SERTAD3;SRSF1;STAT4;TARBP1;TBGR1;TRAF5;TSEN2;UPF3A;ZBTB24;ZFP28;ZMYND15;ZNF234;ZNF251;ZNF331;ZNF514;ZNF528;ZNF548;ZNF585B;ZNF841;ZNF850;ZNF88  
IGL;PTCD3;S1PR1;SCML4;SERTAD3;SLC11A2;SRSF1;STAT4;TARBP1;TBGR1;TRAF5;UPF3A;ZBTB24;ZFP28;ZMYND15;ZNF234;ZNF251;ZNF331;ZNF514;ZNF528;ZNF548;ZNF585B;ZNF841;ZNF850;ZNF88  
IGL;PTCD3;S1PR1;SCML4;SERTAD3;SLC11A2;SRSF1;STAT4;TARBP1;TBGR1;TRAF5;UPF3A;ZBTB24;ZFP28;ZMYND15;ZNF234;ZNF251;ZNF331;ZNF514;ZNF528;ZNF548;ZNF585B;ZNF841;ZNF850;ZNF88  
L;STAT4;TARBP1;TRAF5;TSEN2;UPF3A;ZBTB24;ZFP28;ZMYND15;ZNF234;ZNF251;ZNF331;ZNF514;ZNF528;ZNF548;ZNF585B;ZNF841;ZNF850;ZNF88  
JPF3A;ZBTB24;ZFP28;ZMYND15;ZNF234;ZNF251;ZNF331;ZNF514;ZNF528;ZNF548;ZNF585B;ZNF841;ZNF850;ZNF88  
TRAF5;UPF3A;ZBTB24;ZFP28;ZMYND15;ZNF234;ZNF251;ZNF331;ZNF514;ZNF528;ZNF548;ZNF585B;ZNF841;ZNF850;ZNF88  
JPF3A;ZBTB24;ZFP28;ZMYND15;ZNF234;ZNF251;ZNF331;ZNF514;ZNF528;ZNF548;ZNF585B;ZNF841;ZNF850;ZNF88  
JPF3A;ZBTB24;ZFP28;ZMYND15;ZNF234;ZNF251;ZNF331;ZNF514;ZNF528;ZNF548;ZNF585B;ZNF841;ZNF850;ZNF88  
JPF3A;ZBTB24;ZFP28;ZMYND15;ZNF234;ZNF251;ZNF331;ZNF514;ZNF528;ZNF548;ZNF585B;ZNF841;ZNF850;ZNF88  
L;STAT4;TARBP1;TBGR1;TRAF5;TSEN2;UPF3A;ZBTB24;ZFP28;ZMYND15;ZNF234;ZNF251;ZNF331;ZNF514;ZNF528;ZNF548;ZNF585B;ZNF841;ZNF850;ZNF88  
F5;ZBTB24;ZFP28;ZMYND15;ZNF234;ZNF251;ZNF331;ZNF514;ZNF528;ZNF548;ZNF585B;ZNF841;ZNF850;ZNF88  
;4;ZFP28;ZNF234;ZNF251;ZNF331;ZNF514;ZNF528;ZNF548;ZNF585B;ZNF831;ZNF841;ZNF850;ZNF88  
F5;ZBTB24;ZFP28;ZMYND15;ZNF234;ZNF251;ZNF331;ZNF514;ZNF528;ZNF548;ZNF585B;ZNF841;ZNF850;ZNF88  
T4;TARBP1;TRAF5;ZBTB24;ZFP28;ZMYND15;ZNF234;ZNF251;ZNF331;ZNF514;ZNF528;ZNF548;ZNF585B;ZNF841;ZNF850;ZNF88  
;2B;PER3;PIGG;PIGL;PTCD3;S1PR1;SCML4;SERTAD3;SRSF1;STAT4;TARBP1;TBGR1;TRAF5;TSEN2;UPF3A;ZBTB24;ZFP28;ZMYND15;ZNF234;ZNF251;ZNF331;ZNF514;ZNF528;ZNF548;ZNF585B;ZNF841;ZNF850;ZNF88  
BP1;TRAF5;ZBTB24;ZFP28;ZMYND15;ZNF234;ZNF251;ZNF331;ZNF514;ZNF528;ZNF548;ZNF585B;ZNF841;ZNF850;ZNF88  
BP1;TRAF5;ZBTB24;ZFP28;ZMYND15;ZNF234;ZNF251;ZNF331;ZNF514;ZNF528;ZNF548;ZNF585B;ZNF841;ZNF850;ZNF88  
;15;ZNF234;ZNF251;ZNF331;ZNF514;ZNF528;ZNF548;ZNF585B;ZNF841;ZNF850;ZNF88  
;15;ZNF234;ZNF251;ZNF331;ZNF514;ZNF528;ZNF548;ZNF585B;ZNF841;ZNF850;ZNF88  
585B;ZNF831;ZNF841;ZNF850;ZNF88  
3;SLC11A2;STAT4;TARBP1;TBGR1;TRAF5;UPF3A;ZBTB24;ZFP28;ZMYND15;ZNF234;ZNF251;ZNF331;ZNF514;ZNF528;ZNF548;ZNF585B;ZNF841;ZNF850;ZNF88  
BP1;TRAF5;ZBTB24;ZFP28;ZMYND15;ZNF234;ZNF251;ZNF331;ZNF514;ZNF528;ZNF548;ZNF585B;ZNF841;ZNF850;ZNF88  
P1;TBGR1;TRAF5;UPF3A;ZBTB24;ZFP28;ZMYND15;ZNF234;ZNF251;ZNF331;ZNF514;ZNF528;ZNF548;ZNF585B;ZNF841;ZNF850;ZNF88  
;15;ZNF234;ZNF251;ZNF331;ZNF514;ZNF528;ZNF548;ZNF585B;ZNF841;ZNF850;ZNF88  
F5;ZBTB24;ZFP28;ZMYND15;ZNF234;ZNF251;ZNF331;ZNF514;ZNF528;ZNF548;ZNF585B;ZNF841;ZNF850;ZNF88  
TERFD2;NARF;NR3C2;OFD1;OSBPL3;PER3;PIGG;PIGL;PTCD3;RIC3;S100BPB;SCML4;SEC22C;SERTAD3;SLC11A2;SRSF1;STAT4;SUN1;TARBP1;TBGR1;TSEN2;UPF3A;WDR75;ZBTB24;ZFP28;ZMYND15;ZNF234;ZNF251;ZNF331;ZNF514;ZNF528;ZNF548;ZNF585B;ZNF841;ZNF85  
P525;MTERFD2;NARF;NR3C2;OFD1;OSBPL3;PER3;PIGG;PIGL;PTCD3;RIC3;S100BPB;SCML4;SEC22C;SEPT8;SERTAD3;SLC11A2;SRSF1;STAT4;SUN1;TARBP1;TBGR1;TRAF5;TSEN2;UPF3A;WDR75;ZBTB24;ZFP28;ZMYND15;ZNF234;ZNF251;ZNF331;ZNF514;ZNF528;ZNF548;ZNF585B;ZNF841;ZNF85  
TERFD2;NARF;NR3C2;OFD1;OSBPL3;PER3;PIGG;PIGL;PTCD3;RIC3;S100BPB;SCML4;SEC22C;SERTAD3;SLC11A2;SRSF1;STAT4;SUN1;TARBP1;TBGR1;TSEN2;UPF3A;WDR75;ZBTB24;ZFP28;ZMYND15;ZNF234;ZNF251;ZNF331;ZNF514;ZNF528;ZNF548;ZNF585B;ZNF841;ZNF85  
P525;MTERFD2;NARF;NR3C2;OFD1;OSBPL3;PER3;PIGG;PIGL;PTCD3;RIC3;S100BPB;SCML4;SEC22C;SEPT8;SERTAD3;SLC11A2;SRSF1;STAT4;SUN1;TARBP1;TBGR1;TRAF5;TSEN2;UPF3A;WDR75;ZBTB24;ZFP28;ZMYND15;ZNF234;ZNF251;ZNF331;ZNF514;ZNF528;ZNF548;ZNF585B;ZNF841;ZNF85  
D7;MOAP1;MRPS25;MTERFD2;NARF;NR3C2;OFD1;OSBPL3;PAIP2B;PER3;PIGG;PIGL;PTCD3;RIC3;S100BPB;SCML4;SEC22C;SEPT8;SERTAD3;SLC11A2;SRSF1;STAT4;SUN1;TARBP1;TBGR1;TRAF5;TSEN2;UPF3A;WDR75;ZBTB24;ZFP28;ZMYND15;ZNF234;ZNF251;ZNF331;ZNF514;ZNF528;ZNF548;ZNF585B;ZNF841;ZNF85  
;TARBP1;TRAF5;UPF3A;ZBTB24;ZFP28;ZMYND15;ZNF234;ZNF251;ZNF331;ZNF514;ZNF528;ZNF548;ZNF585B;ZNF841;ZNF850;ZNF88  
LA2;SRSF1;STAT4;TARBP1;TBGR1;TRAF5;TSEN2;UPF3A;ZBTB24;ZFP28;ZMYND15;ZNF234;ZNF251;ZNF331;ZNF514;ZNF528;ZNF548;ZNF585B;ZNF841;ZNF850;ZNF88  
;SLC11A2;SRSF1;STAT4;TARBP1;TBGR1;TRAF5;TSEN2;UPF3A;ZBTB24;ZFP28;ZMYND15;ZNF234;ZNF251;ZNF331;ZNF514;ZNF528;ZNF548;ZNF585B;ZNF841;ZNF850;ZNF88  
LA2;SRSF1;STAT4;TARBP1;TBGR1;TRAF5;TSEN2;UPF3A;ZBTB24;ZFP28;ZMYND15;ZNF234;ZNF251;ZNF331;ZNF514;ZNF528;ZNF548;ZNF585B;ZNF841;ZNF850;ZNF88  
585B;ZNF831;ZNF841;ZNF850;ZNF88  
1;STAT4;TARBP1;TSEN2;UPF3A;ZBTB24;ZFP28;ZNF234;ZNF251;ZNF331;ZNF514;ZNF528;ZNF548;ZNF585B;ZNF831;ZNF841;ZNF850;ZNF88  
L;STAT4;TARBP1;TBGR1;TRAF5;TSEN2;UPF3A;ZBTB24;ZFP28;ZMYND15;ZNF234;ZNF251;ZNF331;ZNF514;ZNF528;ZNF548;ZNF585B;ZNF841;ZNF850;ZNF88  
P1;TRAF5;UPF3A;ZBTB24;ZFP28;ZMYND15;ZNF234;ZNF251;ZNF331;ZNF514;ZNF528;ZNF548;ZNF585B;ZNF841;ZNF850;ZNF88  
;2B;PER3;PIGG;PIGL;PTCD3;S1PR1;SCML4;SERTAD3;SRSF1;STAT4;TARBP1;TBGR1;TRAF5;TSEN2;UPF3A;ZBTB24;ZFP28;ZMYND15;ZNF234;ZNF251;ZNF331;ZNF514;ZNF528;ZNF548;ZNF585B;ZNF841;ZNF850;ZNF88  
LA2;SRSF1;STAT4;TARBP1;TBGR1;TRAF5;TSEN2;UPF3A;ZBTB24;ZFP28;ZMYND15;ZNF234;ZNF251;ZNF331;ZNF514;ZNF528;ZNF548;ZNF585B;ZNF841;ZNF850;ZNF88  
TARBP1;TSEN2;UPF3A;ZBTB24;ZFP28;ZNF234;ZNF251;ZNF331;ZNF514;ZNF528;ZNF548;ZNF585B;ZNF831;ZNF841;ZNF850;ZNF88  
D7;MOAP1;MRPS25;MTERFD2;NARF;NR3C2;OFD1;OSBPL3;PAIP2B;PER3;PIGG;PIGL;PTCD3;RIC3;S100BPB;SCML4;SEC22C;SEPT8;SERTAD3;SLC11A2;SRSF1;STAT4;SUN1;TARBP1;TBGR1;TRAF5;TSEN2;UPF3A;WDR75;ZBTB24;ZFP28;ZMYND15;ZNF234;ZNF251;ZNF331;ZNF514;ZNF528;ZNF548;ZNF585B;ZNF841;ZNF850;ZNF88  
;15;ZNF234;ZNF251;ZNF331;ZNF514;ZNF528;ZNF548;ZNF585B;ZNF841;ZNF850;ZNF88  
;SLC11A2;SRSF1;STAT4;TARBP1;TBGR1;TRAF5;TSEN2;UPF3A;ZBTB24;ZFP28;ZMYND15;ZNF234;ZNF251;ZNF331;ZNF514;ZNF528;ZNF548;ZNF585B;ZNF841;ZNF850;ZNF88  
;MOAP1;MRPS25;MTERFD2;NR3C2;PAIP2B;PER3;PIGG;PIGL;PTCD3;S1PR1;SCML4;SERTAD3;SLC11A2;SRSF1;STAT4;TARBP1;TBGR1;TRAF5;TSEN2;UPF3A;ZBTB24;ZFP28;ZMYND15;ZNF234;ZNF251;ZNF331;ZNF514;ZNF528;ZNF548;ZNF585B;ZNF841;ZNF850;ZNF88  
f;1;STAT4;SUN1;TARBP1;TBGR1;TSEN2;UPF3A;WDR75;ZBTB24;ZFP28;ZMYND15;ZNF234;ZNF251;ZNF331;ZNF514;ZNF528;ZNF548;ZNF585B;ZNF841;ZNF85  
;15;ZNF234;ZNF251;ZNF331;ZNF514;ZNF528;ZNF548;ZNF585B;ZNF841;ZNF850;ZNF88

DL;KCTD7;MOAP1;MRPS25;MTERFD2;NARF;NR3C2;OFD1;OSBPL3;PAIP2B;PER3;PIGG;PIGL;PTCD3;RIC3;S100PBP;S1PR1;SCML4;SEC22C;SEMA6B;SEPT8;SERTAD3;SLC11A2;SRSF1;STAT4;SUN1;TARBP1;TBRG1;TRAF5;TSEN2;UPF3A;WDR75;ZBTB24;ZFP28;ZMYND15;ZNF234;ZNF251;ZNF331;ZNF514;ZNF528;  
DL;KCTD7;MOAP1;MRPS25;MTERFD2;NARF;NR3C2;OFD1;OSBPL3;PAIP2B;PER3;PIGG;PIGL;PTCD3;RIC3;S100PBP;S1PR1;SCML4;SEC22C;SEMA6B;SEPT8;SERTAD3;SLC11A2;SRSF1;STAT4;SUN1;TARBP1;TBRG1;TRAF5;TSEN2;UPF3A;WDR75;ZBTB24;ZFP28;ZMYND15;ZNF234;ZNF251;ZNF331;ZNF514;ZNF528;

NR3C2;PAIP2B;PER3;PIGG;PIGL;PTCD3;S1PR1;SCML4;SERTAD3;SLC11A2;SRSF1;STAT4;TARBP1;TBRG1;TRAF5;TSEN2;UPF3A;ZBTB24;ZFP28;ZMYND15;ZNF234;ZNF251;ZNF331;ZNF514;ZNF528;ZNF548;ZNF585B;ZNF841;ZNF850;ZNF88

NR3C2;PAIP2B;PER3;PIGG;PIGL;PTCD3;S1PR1;SCML4;SERTAD3;SRSF1;STAT4;TARBP1;TBRG1;TRAF5;TSEN2;UPF3A;ZBTB24;ZFP28;ZMYND15;ZNF234;ZNF251;ZNF331;ZNF514;ZNF528;ZNF548;ZNF585B;ZNF841;ZNF850;ZNF88

NR3C2;OFD1;OSBPL3;PAIP2B;PTCD3;RIC3;S100PBP;S1PR1;SCML4;SEPT8;SERTAD3;SLC11A2;SRSF1;STAT4;SUN1;TARBP1;TBRG1;TRAF5;TSEN2;UPF3A;ZBTB24;ZFP28;ZMYND15;ZNF234;ZNF251;ZNF331;ZNF514;ZNF528;ZNF548;ZNF585B;ZNF831;ZNF841;ZNF850;ZNF88

NR3C2;OFD1;OSBPL3;PAIP2B;PTCD3;RIC3;S100PBP;S1PR1;SCML4;SEPT8;SERTAD3;SLC11A2;SRSF1;STAT4;SUN1;TARBP1;TBRG1;TRAF5;TSEN2;UPF3A;ZBTB24;ZFP28;ZMYND15;ZNF234;ZNF251;ZNF331;ZNF514;ZNF528;ZNF548;ZNF585B;ZNF841;ZNF850;ZNF88

;ZNF528;ZNF548;ZNF585B;ZNF831;ZNF841;ZNF850;ZNF88

850

;ZNF528;ZNF548;ZNF585B;ZNF831;ZNF841;ZNF850;ZNF88

P70;TNFRSF13C  
HR3;CELSR1;CNR2;CNTNAP2;CR2;CTGF;CXCR5;DIRAS1;ENAH;EVC2;FCER2;FCRL1;FCRL2;FCRL3;FCRL5;GNG7;HLA-DOA;HLA-DOB;HTR3A;ICOSLG;KCNG1;KCNH8;KCNIP2;L1CAM;MS4A1;NETO1;P2RX5;PARM1;PAWR;PCDH9;PIK3C2B;PMEPA1;PPAPDC1B;PTPRK;QSOX2;RASGRP3;SCN4A;SIGLEC6;SLC15A2;SLC  
HR3;CELSR1;CNR2;CNTNAP2;CR2;CTGF;CXCR5;DIRAS1;ENAH;EVC2;FCER2;FCRL1;FCRL2;FCRL3;FCRL5;GNG7;HLA-DOA;HLA-DOB;HTR3A;ICOSLG;KCNG1;KCNH8;KCNIP2;L1CAM;MS4A1;NETO1;P2RX5;PARM1;PAWR;PCDH9;PIK3C2B;PMEPA1;PPAPDC1B;PTPRK;QSOX2;RASGRP3;SCN4A;SIGLEC6;SLC15A2;SLC  
;SWAP70;TNFRSF13C  
TNFRSF13C  
DOA;HLA-DOB;IRF4;MS4A1;PAWR;PAX5;POU2AF1;SWAP70;TNFRSF13C  
SLG;KCNG1;KCNIP2;MS4A1;P2RX5;PTPRK;RASGRP3;SCN4A;SIGLEC6;SLC15A2;TSPAN1  
FCER2;GNG7;HLA-DOA;HLA-DOB;HTR3A;ICOSLG;KCNG1;KCNIP2;L1CAM;MS4A1;P2RX5;PTPRK;RASGRP3;SCN4A;SIGLEC6;SLC15A2;TNFRSF13C;TSPAN1  
SLG;KCNG1;KCNIP2;MS4A1;P2RX5;PTPRK;RASGRP3;SCN4A;SIGLEC6;SLC15A2;TSPAN1  
PAWR;SWAP70;TNFRSF13C

;R2;CXCR5;DTX1;ENAH;FCER2;HLA-DOA;HLA-DOB;ICOSLG;IRF4;L1CAM;MS4A1;PAWR;PAX5;POU2AF1;SWAP70;TNFRSF13C

EC17A;CNR2;CNTNAP2;CR2;CXCR5;DENND5B;EVC2;FCER2;FCRL1;FCRL2;FCRL3;FCRL5;GYTL1B;HLA-DOA;HLA-DOB;HS3ST1;HTR3A;ICOSLG;KCNG1;KCNH8;KCNIP2;L1CAM;LARGE;MARCH3;MOXD1;MS4A1;NETO1;NIPAL4;P2RX5;PARM1;PCDH9;PMEPA1;PPAPDC1B;PTPRK;QSOX2;RASGRP3;SCN4A;SEL1L3;S  
;R1;CLEC17A;CNR2;CNTNAP2;CR2;CXCR5;DENND5B;EVC2;FCER2;FCRL1;FCRL2;FCRL3;FCRL5;GYTL1B;HLA-DOA;HLA-DOB;HS3ST1;HTR3A;ICOSLG;KCNG1;KCNH8;KCNIP2;L1CAM;LARGE;MARCH3;MOXD1;MS4A1;NETO1;NIPAL4;P2RX5;PARM1;PCDH9;PMEPA1;PPAPDC1B;PTPRK;QSOX2;RASGRP3;SCN4A;SEI  
/R;TNFRSF13C

D83;CDHR3;CELSR1;CLEC17A;CNR2;CNTNAP2;CORO2B;CR2;CTGF;CXCR5;DENND5B;DIRAS1;ENAH;EVC2;FARP2;FCER2;FCRL1;FCRL2;FCRL3;FCRL5;GGA2;GNG7;GYTL1B;HLA-DOA;HLA-DOB;HS3ST1;HTR3A;ICOSLG;KCNG1;KCNH8;KCNIP2;KLHL14;L1CAM;LARGE;MARCH3;MOXD1;MS4A1;NETO1;NIPAL4;P2R

;GHRL;GNG7;HTR3A;IRF4;L1CAM;LAMAS;NXPH4;P2RX5;PAWR;PEG10;PMEPA1;PNOC;PRICKLE1;PTPRK;SPRY1;STAP;  
;R1;CLEC17A;CNR2;CNTNAP2;CR2;CXCR5;DENND5B;EVC2;FARP2;FCER2;FCRL1;FCRL2;FCRL3;FCRL5;GGA2;GNG7;GYTL1B;HLA-DOA;HLA-DOB;HS3ST1;HTR3A;ICOSLG;KCNG1;KCNH8;KCNIP2;KLHL14;L1CAM;LARGE;MARCH3;MOXD1;MS4A1;NETO1;NIPAL4;P2RX5;PARM1;PCDH9;PMEPA1;PPAPDC1B;PTPRK

);CD72;CD79A;CD79B;CD83;CDCA7L;CDHR3;CELSR1;CNR2;CNTNAP2;COCH;COL19A1;COL4A3;COL4A4;CORO2B;CR2;CTGF;CXCR5;DIRAS1;DPF3;DTX1;E2F5;EBF1;EGR3;ENAH;EVC2;FARP2;FCRL2;FCRLA;GGA2;GHRL;GNG7;GYTL1B;HLA-DOA;HTR3A;ICOSLG;IRF4;KCNG1;KCNH8;KCNIP2;L1CAM;LAMAS;LAMC

;PTPRK;SIGLECE

;PTPRK;SIGLECE

;D79B;CD83;CDHR3;CELSR1;CNR2;CNTNAP2;COCH;COL19A1;COL4A3;COL4A4;CORO2B;CR2;CTGF;CXCR5;DIRAS1;DPF3;DTX1;E2F5;EGR3;ENAH;EVC2;FARP2;FCRL2;FCRLA;GGA2;GHRL;GNG7;GYTL1B;HLA-DOA;HTR3A;ICOSLG;IRF4;KCNG1;KCNH8;KCNIP2;L1CAM;LAMAS;LAMC1;LARGE;MAP2;MICAL3;MMF

DL19A1;COL4A3;COL4A4;CTGF;CXCR5;DPF3;DTX1;E2F5;EBF1;EGR3;ENAH;FARP2;GHRL;GNG7;HLA-DOA;HTR3A;ICOSLG;IRF4;KCNG1;KCNH8;KCNIP2;L1CAM;LAMA5;LAMC1;MACROD2;MAP2;MMP11;MYBPC2;NETO1;P2RX5;PAWR;PAX5;PEG10;PNOC;PRICKLE1;RAPGEF5;SCN4A;SEMA3G;SOBP;SPRY1;STRB

;CXCR5;DPF3;DTX1;E2F5;EBF1;EGR3;ENAH;FARP2;GHRL;HLA-DOA;IRF4;KCNIP2;L1CAM;LAMA5;LAMC1;MACROD2;MAP2;MMP11;P2RX5;PAX5;PEG10;PRICKLE1;RAPGEF5;SEMA3G;SOBP;SPRY1;STRBP;SWAP70;TCF4;TCL1

COL4A4;CTGF;CXCR5;DPF3;DTX1;E2F5;EBF1;EGR3;ENAH;FARP2;GHRL;GNG7;HLA-DOA;HTR3A;ICOSLG;IRF4;KCNG1;KCNH8;KCNIP2;L1CAM;LAMA5;LAMC1;MACROD2;MAP2;MMP11;MYBPC2;NETO1;P2RX5;PAWR;PAX5;PEG10;PNOC;PRICKLE1;RAPGEF5;SCN4A;SEMA3G;SOBP;SPRY1;STRBP;SWAP70;TCF4;

LSR1;CNR2;CNTNAP2;COL4A3;COL4A4;CR2;CTGF;CXCR5;DIRAS1;DTX1;E2F5;EGR3;ENAH;EVC2;FARP2;FCER2;GHRL;GNG7;HLA-DOA;HLA-DOB;HTR3A;ICOSLG;IRF4;KCNIP2;L1CAM;LAMA5;LAMC1;MAP2;MS4A1;NETO1;NXPH4;P2RX5;PAWR;PAX5;PEG10;PIK3C2B;PKIG;PLEKHG1;PMEPA1;PNOC;POU2AF1;PR

4;LAMC1;MACROD2;MAP2;P2RX5;PAX5;PRICKLE1;RAPGEF5;TCF4

AP2;TCF4

;DIRAS1;DTX1;E2F5;EGR3;ENAH;EVC2;FARP2;FCRL2;GHRL;GNG7;HTR3A;ICOSLG;IRF4;KCNG1;KCNH8;KCNIP2;L1CAM;LAMA5;NETO1;NXPH4;P2RX5;PAWR;PEG10;PIK3C2B;PKIG;PLEKHG1;PMEPA1;PNOC;PRICKLE1;PTPRK;RAPGEF5;RASGRP3;SIGLEC6;SNX22;SPRY1;STAP;  
;DIRAS1;DTX1;E2F5;EGR3;ENAH;EVC2;FARP2;FCRL2;GHRL;GNG7;HTR3A;ICOSLG;IRF4;KCNG1;KCNH8;KCNIP2;L1CAM;LAMA5;NETO1;NXPH4;P2RX5;PAWR;PEG10;PIK3C2B;PKIG;PLEKHG1;PMEPA1;PNOC;PRICKLE1;PTPRK;RAPGEF5;RASGRP3;SIGLEC6;SPRY1;STAP;  
;DIRAS1;DTX1;E2F5;EGR3;ENAH;EVC2;FARP2;FCRL2;GHRL;GNG7;HTR3A;ICOSLG;IRF4;KCNG1;KCNH8;KCNIP2;L1CAM;LAMA5;NETO1;NXPH4;P2RX5;PAWR;PEG10;PIK3C2B;PKIG;PLEKHG1;PMEPA1;PNOC;PRICKLE1;PTPRK;RAPGEF5;RASGRP3;SIGLEC6;SPRY1;STAP;  
4  
;COL4A4;CTGF;CXCR5;DPF3;DTX1;E2F5;EGR3;ENAH;FARP2;GHRL;HLA-DOA;IRF4;KCNIP2;L1CAM;LAMA5;LAMC1;MACROD2;MAP2;P2RX5;PAX5;PEG10;PRICKLE1;RAPGEF5;SOBP;SPRY1;STRBP;SWAP70;TCF4;TCL1

R5;DPF3;DTX1;E2F5;EGR3;ENAH;FARP2;GHRL;HLA-DOA;IRF4;KCNIP2;L1CAM;LAMA5;LAMC1;MACROD2;MAP2;P2RX5;PAX5;PEG10;PRICKLE1;RAPGEF5;SOBP;SPRY1;SWAP70;TCF

4H;FARP2;FCRLA;GHRL;HLA-DOA;IRF4;KCNIP2;L1CAM;LAMA5;LAMC1;MAP2;PAX5;PEG10;PRICKLE1;SPRY1;STRBP;TCF4;TCL1

A4;CTGF;CXCR5;DTX1;E2F5;EGR3;ENAH;FARP2;GHRL;HLA-DOA;IRF4;KCNIP2;L1CAM;LAMA5;LAMC1;MACROD2;MAP2;PAX5;PEG10;PRICKLE1;SOBP;SPRY1;STRBP;TCF4;TCL1

;COL4A4;CTGF;CXCR5;DPF3;DTX1;E2F5;EBF1;EGR3;ENAH;FARP2;FCRLA;GHR1;HLA-DOA;IRF4;KCNIP2;L1CAM;LAMA5;LAMC1;MACROD2;MAP2;MMP11;P2RX5;PAX5;PEG10;PRICKLE1;RAPGEF5;SEMA3G;SOBP;SPRY1;STRBP;SWAP70;TCF4;TCL1

AP2;TCF4

X1;ENAH;FARP2;FCRLA;GHR1;HLA-DOA;IRF4;KCNIP2;L1CAM;LAMA5;LAMC1;MAP2;PAX5;PEG10;PRICKLE1;SPRY1;STRBP;TCF4;TCL1

;DIRAS1;DTX1;E2F5;ENAH;EVC2;FARP2;GHR1;GNG7;HTR3A;ICOSLG;IRF4;KCNIP2;L1CAM;LAMA5;NXPH4;P2RX5;PAWR;PEG10;PIK3C2B;PKIG;PLEKHG1;PMEPA1;PNOC;PRICKLE1;PTPRK;RAPGEF5;RASGRP3;SPRY1;STAP;  
CAM;P2RX5;PAWR;PEG10;PLEKHG1;PMEPA1;PRICKLE1;RAPGEF5;RASGRP3;SPRY1;TNFRSF13

AMC1;PTPRK

VC1;MAP2;STRBP;TCF4;TCL1







A3;TEX101;THSD7A

STYK1;TGFB3;TLR:

STYK1;TGFB3;TLR:

'O6;SLC4A4;STYK1;TGFB3;TLR:

'O6;PDGFD;PHLDA1;PHLDB2;SLC4A4;STYK1;TGFBR3;TLR:

TGFBR3;TLR:

IGFBR3;TLR2

1;OAS2;OAS3;OASL;PLSCR1;RSAD2;TRIM2;  
.;OAS1;OAS2;OAS3;OASL;PLSCR1;RSAD2;TRIM2;  
X1;OAS1;OAS2;OAS3;OASL;PLSCR1;RSAD2;USP18;XAF1;ZBP;  
ISG15;LILRB5;MT2A;MX1;OAS1;OAS2;OAS3;OASL;PLSCR1;RSAD2;SIGLEC1;TRIM22;USP18;XAF1;ZBP;

F7;ISG15;MX1;OAS1;OAS2;OAS3;OASL;PLSCR1;RSAD2;TRIM2;

F7;ISG15;MX1;OAS1;OAS2;OAS3;OASL;PLSCR1;RSAD2;TRIM2;  
.;OAS1;OAS2;OAS3;OASL;PLSCR1;RSAD2;TRIM2;  
T2A;MX1;OAS1;OAS2;OAS3;OASL;PLSCR1;RSAD2;TRIM22;USP18;XAF1;ZBP;  
1;USP18;XAF1;ZBP1

1;ZBP1

ISG15;MT2A;MX1;OAS1;OAS2;OAS3;OASL;PLSCR1;RSAD2;TRIM22;USP18;XAF1;ZBP;

F7;ISG15;MX1;OAS1;OAS2;OAS3;OASL;PLSCR1;RSAD2;TRIM2;

ISG15;LILRB5;MT2A;MX1;OAS1;OAS2;OAS3;OASL;PLSCR1;PNPT1;RSAD2;SIGLEC1;TOR1B;TRIM22;USP18;XAF1;ZBP  
M22

OAS2;OAS3;OASL;PLSCR1;PNPT1;TOR1B;USP18;XAF1;ZBP;  
M22  
M22  
ASL;PNPT1;USP18;XAF1;ZBP1

M22

ZBP1

OAS1;OAS2;OAS3;OASL;PLSCR1;PNPT1;RTP4;TOR1B;USP18;XAF1;ZBP;  
ASL;PNPT1;USP18;XAF1;ZBP1

I6;IFIH1;IFIT1;IFIT2;IFIT3;IFITM3;IRF7;ISG15;LAMP3;MT2A;MX1;OAS1;OAS2;OAS3;OASL;OTOF;PLSCR1;PNPT1;RSAD2;RSPH9;RTP4;SAM4A;SPATS2L;TDRD7;TOR1B;TRIM22;TRIM69;USP18;XAF1;ZBP1;ZCCHC

RD7;TRIM2;

3;IFIT5;IFITM3;IRF7;ISG15;LILRB5;LY6E;MT2A;MX1;OAS1;OAS2;OAS3;OASL;PLSCR1;PNPT1;RSAD2;RTP4;SIGLEC1;TOR1B;TRIM22;USP18;XAF1;ZBP  
RD7;TRIM2;  
;PLSCR1;USP18;XAF1;ZBP1

PLSCR1;USP18;XAF1;ZBP1

515;LILRB5;LY6E;MT2A;MX1;OAS1;OAS2;OAS3;OASL;OTOF;PLSCR1;RSAD2;USP18;XAF1;ZBP1;ZCCHC

IRF7;ISG15;LAMP3;MT2A;MX1;OAS1;OAS2;OAS3;OASL;OTOF;PLSCR1;PNPT1;RSAD2;RSPH9;TDRD7;TOR1B;TRIM22;USP18;XAF1;ZBP

5;LY6E;MT2A;MX1;OAS1;OAS2;OAS3;OASL;PLSCR1;RSAD2;USP18;XAF1;ZBP

515;LILRB5;LY6E;MT2A;MX1;OAS1;OAS2;OAS3;OASL;OTOF;PLSCR1;RSAD2;USP18;XAF1;ZBP

515;LILRB5;LY6E;MT2A;MX1;OAS1;OAS2;OAS3;OASL;OTOF;PLSCR1;RSAD2;USP18;XAF1;ZBP

7;ISG15;LILRB5;LY6E;MT2A;MX1;OAS1;OAS2;OAS3;OASL;PLSCR1;PNPT1;RSAD2;USP18;XAF1;ZBP

I6;IFIH1;IFIT1;IFIT2;IFIT3;IFIT5;IFITM3;IRF7;ISG15;LAMP3;MT2A;MX1;OAS1;OAS2;OAS3;OASL;OTOF;PARP12;PHF11;PLSCR1;PNPT1;RSAD2;RSPH9;RTP4;SAMD4A;SPATS2L;TDRD7;TOR1B;TRIM22;TRIM69;USP18;XAF1;ZBP1;ZCCHC

I6;IFIH1;IFIT1;IFIT2;IFIT3;IFIT5;IFITM3;IRF7;ISG15;LAMP3;MT2A;MX1;OAS1;OAS2;OAS3;OASL;OTOF;PARP12;PHF11;PLSCR1;PNPT1;RSAD2;RSPH9;RTP4;SAMD4A;SPATS2L;TDRD7;TOR1B;TRIM22;TRIM69;USP18;XAF1;ZBP1;ZCCHC

OASL;PLSCR1;PNPT1;RSAD2;SAMD4A

.SCR1;PNPT1;TDRD7;ZBP1;ZCCHC

IFIT3;IFITM3;IRF7;ISG15;LILRB5;LY6E;MT2A;MX1;OAS1;OAS2;OAS3;OASL;OTOF;PLSCR1;PNPT1;RSAD2;RSPH9;RTP4;SIGLEC1;TDRD7;TOR1B;TRIM69;USP18;XAF1;ZBP1;ZCCHC

I6;IFIH1;IFIT1;IFIT2;IFIT3;IFIT5;IFITM3;IRF7;ISG15;LAMP3;LY6E;MT2A;MX1;OAS1;OAS2;OAS3;OASL;OTOF;PARP12;PHF11;PLSCR1;PNPT1;RSAD2;RSPH9;RTP4;SAMD4A;SIGLEC1;SPATS2L;TDRD7;TOR1B;TRIM22;TRIM69;USP18;XAF1;ZBP1;ZCCHC

I6;IFIH1;IFIT1;IFIT2;IFIT3;IFIT5;IFITM3;IRF7;ISG15;LAMP3;LY6E;MT2A;MX1;OAS1;OAS2;OAS3;OASL;OTOF;PARP12;PHF11;PLSCR1;PNPT1;RSAD2;RSPH9;RTP4;SAMD4A;SIGLEC1;SPATS2L;TDRD7;TOR1B;TRIM22;TRIM69;USP18;XAF1;ZBP1;ZCCHC



;PARP12;PHF11;PLSCR1;RSAD2;RUFY4;TOR1B;TRIM22;TRIM69;XAF1;ZCCHC

4A

SL;PARP12;PLSCR1;PNPT1;TDRD7;TOR1B;ZBP1;ZCCHC

SL;PARP12;PLSCR1;PNPT1;TDRD7;TOR1B;ZBP1;ZCCHC

IFIT3;IFITM3;IRF7;ISG15;LAMP3;LILRB5;LY6E;MT2A;MX1;OAS1;OAS2;OAS3;OASL;OTOF;PLSCR1;PNPT1;RSAD2;RSPH9;RTP4;SIGLEC1;TDRD7;TOR1B;TRIM69;USP18;XAF1;ZBP1;ZCCHC

IP12;PNPT1;RSAD2;TOR1B;TRIM22;TRIM69;USP18;ZBP1

5;LY6E;MT2A;MX1;OAS1;OAS2;OAS3;OASL;PHF11;PLSCR1;PNPT1;RSAD2;SAMD4A;TRIM22;USP18;XAF1;ZBP;

315;LILRB5;LY6E;MT2A;MX1;OAS1;OAS2;OAS3;OASL;OTOF;PHF11;PLSCR1;PNPT1;RSAD2;SAMD4A;TDRD7;TRIM22;USP18;XAF1;ZBP

!IM69;XAF1;ZCCHC2

K1;OAS1;OAS2;OAS3;OASL;OTOF;PARP12;PHF11;PLSCR1;PNPT1;RSAD2;RSPH9;SPATS2L;TDRD7;TOR1B;TRIM22;TRIM69;USP18;XAF1;ZBP

A7A;SIGLEC8;SLC29A1;SMPD3;SRGAP3;TEC  
A7A;SIGLEC8;SLC29A1;SMPD3;SRGAP3;TEC

A7A;SIGLEC8;SLC29A1;SMPD3;SRGAP3;TEC

MA7A;SIGLEC8;SLC29A1;SRGAP3;TEC;THBS4

I1;SLAMF7;SMAD7;SPON2;VIT;WNT1

I1;SLAMF7;SMAD7;SPON2;VIT;WNT1

G1;LAG3;LGR6;NMUR1;NPC1;PDGFRB;PTCH1;PTGDR;S1PR5;SLAMF6;SLAMF7

I2DL1;KLRD1;LAG3;NCAM1;NKG7;NMUR1;NPC1;PCDH1;PDGFRB;PTCH1;RGS9;SGCD;SMAD7;SYT11;SYTL2

ASLG;FCRL6;FEZ1;FZD4;GPR114;GPR153;GPR56;GPR68;GZMB;KIR2DL1;KLRD1;KLRG1;LAG3;LGR6;LIM2;NCAM1;NKG7;NMUR1;NPC1;PCDH1;PDGFRB;PDZD4;PTCH1;PTGDR;RAB7L1;RGS9;S1PR5;SGCD;SLAMF6;SLAMF7;SLC1A7;SMAD7;SYT11;SYTL2;TIGIT;WNT1;XPNPEP

ASLG;FCRL6;FEZ1;FZD4;GPR114;GPR153;GPR56;GPR68;GZMB;KIR2DL1;KLRD1;KLRG1;LAG3;LGR6;LIM2;NCAM1;NKG7;NMUR1;NPC1;PCDH1;PDGFRB;PTCH1;PTGDR;RAB7L1;RGS9;S1PR5;SGCD;SLAMF6;SLAMF7;SLC1A7;SMAD7;SYT11;SYTL2;TIGIT;WNT1;XPNPEP

IADD;EFNA5;ERBB2;F2R;FASLG;FZD4;GFI1;GPR114;GPR56;GPR68;KIR2DL1;KLRD1;KLRG1;LAG3;MTSS1;NCAM1;NMUR1;PDGFRB;PIK3R3;PPP2R2B;PTCH1;PTGDR;RAB7L1;RASGEF1A;RCAN2;RGS9;SH2D2A;SMAD7;USP28;WNT1;YPEL1;YWHAQ;ZFYVE2

GPR68;KIR2DL1;KLRD1;KLRG1;LAG3;MTSS1;NCAM1;NMUR1;PDGFRB;PIK3R3;PTCH1;PTGDR;RGS9;SMAD7;WNT1;ZFYVE2

R1;NPC1;PDGFRB;PTCH1;PTGDR;S1PR5

IUSP8;EDARADD;EFNA5;ERBB2;F2R;FASLG;FZD4;GFI1;GPR114;GPR56;GPR68;KIR2DL1;KLRD1;KLRG1;LAG3;MTSS1;NCALD;NCAM1;NMUR1;NPC1;PCDH1;PDGFRB;PIK3R3;PPP2R2B;PTCH1;PTGDR;RAB7L1;RASGEF1A;RCAN2;RGS9;SH2D2A;SMAD7;USP28;WNT1;YPEL1;YWHAQ;ZFYVE2

IUSP8;EDARADD;EFNA5;ERBB2;F2R;FASLG;FZD4;GFI1;GPR114;GPR56;GPR68;KIR2DL1;KLRD1;KLRG1;LAG3;MTSS1;NCALD;NCAM1;NMUR1;PCDH1;PDGFRB;PIK3R3;PPP2R2B;PTCH1;PTGDR;RAB7L1;RASGEF1A;RCAN2;RGS9;SH2D2A;SMAD7;USP28;WNT1;YPEL1;YWHAQ;ZFYVE2

IUSP8;EDARADD;EFNA5;ERBB2;F2R;FASLG;FZD4;GFI1;GPR114;GPR56;GPR68;KIR2DL1;KLRD1;KLRG1;LAG3;MTSS1;NCALD;NCAM1;NMUR1;PCDH1;PDGFRB;PIK3R3;PPP2R2B;PTCH1;PTGDR;RAB7L1;RASGEF1A;RCAN2;RGS9;SH2D2A;SMAD7;USP28;WNT1;YPEL1;YWHAQ;ZFYVE2

CX3CR1;CXCR6;DLGS;DTHD1;DUSP8;EDARADD;EFNA5;EOMES;ERBB2;F2R;FASLG;FEZ1;FZD4;GFI1;GPR114;GPR56;GPR68;HOXC4;HOXC5;KIR2DL1;KLRD1;KLRG1;LAG3;LDB2;LLGL2;MTSS1;MYO3B;NCAM1;NEB;NMUR1;NPC1;NUAK1;PAK6;PATL2;PDGFRB;PIK3R3;PODN;PPP2R2B;PTCH1;PTGDR;RAB7L1;RASC

R1;NPC1;PDGFRB;PTCH1;PTGDR;S1PR5

;TIGIT

;SH2D1B;SLAMF7;SPON2

R1;NPC1;PDGFRB;PTCH1;PTGDR;RGS9;S1PR5;SMAD7

R1;NPC1;PDGFRB;PTCH1;PTGDR;RGS9;S1PR5;SMAD7

CX3CR1;CXCR6;DLGS;DTHD1;DUSP8;EDARADD;EFNA5;EOMES;ERBB2;F2R;FASLG;FEZ1;FZD4;GFI1;GPR114;GPR56;GPR68;HOXC4;HOXC5;KIR2DL1;KLRD1;KLRG1;LAG3;LDB2;LLGL2;MTSS1;MYO3B;NCAM1;NEB;NMUR1;NPC1;NUAK1;PAK6;PATL2;PDGFRB;PIK3R3;PODN;PPP2R2B;PTCH1;PTGDR;RAB7L1;RASC

IF7;SPON2;TBX21

G3;NCAM1;NPC1;NUAK1;PDGFRB;PTCH1;RASGEF1A;RGS9;SH2D1B;SMAD7;TBX21;WNT1;YPEL1;ZFYVE2

I;CHST10;CLIC3;CX3CR1;CXCR6;DLGS;DTHD1;DUSP8;EDARADD;EFNA5;EOMES;EPDR1;ERBB2;F2R;FASLG;FEZ1;FZD4;GFI1;GPR114;GPR56;GPR68;GZMB;GZMH;KIF19;KIR2DL1;KLRD1;KLRG1;LAG3;LDB2;LIM2;LLGL2;MTSS1;MYO3B;NCALD;NCAM1;NEB;NMUR1;NPC1;NUAK1;PAK6;PATL2;PCDH1;PDGFRB;PIK

ADD;EFNA5;ERBB2;F2R;FASLG;FEZ1;FZD4;GFI1;GPR114;GPR56;GPR68;KIR2DL1;KLRD1;KLRG1;LAG3;MTSS1;NCAM1;NMUR1;NPC1;NUAK1;PDGFRB;PIK3R3;PPP2R2B;PTCH1;PTGDR;RAB7L1;RASGEF1A;RCAN2;RGS9;SH2D2A;SMAD7;USP28;WNT1;YPEL1;YWHQA;ZFYVE2

HOXC4;HOXC5;LDB2;LIM2;MSC;MTSS1;NCAM1;NEB;PCDH1;PDGFRB;PPP2R2B;PTCH1;RCAN2;RGS9;S1PR5;SGCD;SH2D2A;SMAD7;SPON2;TBX21;WNT1;YPEL

EPB41L4A;EPHX4;ERBB2;F2R;FASLG;FCRL6;FZD4;GPR114;GPR153;GPR56;GPR68;GZMB;ITPRL1;JAKMIP1;KIR2DL1;KLRD1;KLRG1;LAG3;LGR6;LIM2;MANEAL;NCALD;NCAM1;NKG7;NMUR1;NPC1;PCDH1;PDGFRB;PTCH1;PTGDR;RGS9;S1PR5;SCD5;SGCD;SLAMF6;SLAMF7;SLC1A7;SMAD7;SYT11;SYTL2;TIGIT;

I1;PDGFRB;SYT11  
;NCAM1;PIK3R3;SH2D1B;SLAMF7;SPON2;TBX21;TIGIT;WNT:

L1;RASGEF1A;RCAN2;RGS9;SMAD7;USP28;WNT1;YPEL1;YWHAC

XCR6;DLG5;DTHD1;DUSP8;EDARADD;EFNA5;EOMES;ERBB2;F2R;FASLG;FEZ1;FZD4;GFI1;GNLY;GPR114;GPR56;GPR68;KIR2DL1;KLRD1;KLRG1;LAG3;MTSS1;MYO3B;NCAM1;NMUR1;NPC1;NUAK1;PDGFRB;PIK3R3;PPP2R2B;PTCH1;PTGDR;RAB7L1;RASGEF1A;RCAN2;RGS9;SH2D1B;SH2D2A;SLAMF7;SMAD7;S

CX3CR1;CXCR6;DLG5;DTHD1;DUSP8;EDARADD;EFNA5;EOMES;ERBB2;F2R;FASLG;FEZ1;FZD4;GFI1;GNLY;GPR114;GPR56;GPR68;HOXC4;HOXC5;KIR2DL1;KLRD1;KLRG1;LAG3;LDB2;LLGL2;MTSS1;MYO3B;NCAM1;NEB;NMUR1;NPC1;NUAK1;PAK6;PATL2;PDGFRB;PIK3R3;PODN;PPP2R2B;PTCH1;PTGDR;RAB7L1

N2;TBX21

'NT1

G1;LAG3;MTSS1;NCAM1;NPC1;NUAK1;PDGFRB;PIK3R3;PPP2R2B;PTGDR;SH2D1B;SLAMF7;SMAD7;SPON2;USP28;WNT1

};CHST10;CLIC3;CX3CR1;CXCR6;DLG5;DTHD1;DUSP8;EDARADD;EFNA5;EOMES;EPDR1;ERBB2;F2R;FASLG;FEZ1;FZD4;GFI1;GPR114;GPR56;GPR68;GZMB;GZMH;HOXC4;HOXC5;KIF19;KIR2DL1;KLRD1;KLRG1;LAG3;LDB2;LIM2;LLGL2;MSC;MTSS1;MYO3B;NCALD;NCAM1;NEB;NMUR1;NPC1;NUAK1;PAK6;PATL2  
EPHX4;ERBB2;F2R;FASLG;FCRL6;FZD4;GPR114;GPR153;GPR56;GPR68;ITPR1L1;KIR2DL1;KLRD1;KLRG1;LAG3;LGR6;LIM2;MANEAL;NCAM1;NKG7;NMUR1;NPC1;PCDH1;PDGFRB;PTCH1;PTGDR;S1PR5;SCD5;SGCD;SLAMF6;SLAMF7;SLC1A7;SYT11;TIGIT;TM4SF19;VANGL1;XPNPEP  
2;CLIC3;CX3CR1;CXCR6;DLG5;EFNA5;EPB41L4A;EPHX4;ERBB2;F2R;FASLG;FCRL6;FEZ1;FZD4;GPR114;GPR153;GPR56;GPR68;GZMB;ITPR1L1;JAKMIP1;KIR2DL1;KLRD1;KLRG1;LAG3;LGR6;LIM2;MANEAL;NCALD;NCAM1;NKG7;NMUR1;NPC1;PCDH1;PDGFRB;PPP2R2B;PTCH1;PTGDR;RAB11FIP5;RAB7L1;RGS9;

HOXC4;HOXC5;LDB2;LIM2;MSC;MTSS1;NCAM1;NEB;PCDH1;PDGFRB;PPP2R2B;PTCH1;PTGDR;RCAN2;RGS9;S1PR5;SGCD;SH2D2A;SMAD7;SPON2;TBX21;VANGL1;WNT1;YPEL

'11

HOXC4;HOXC5;LDB2;LIM2;MSC;MTSS1;NCAM1;NEB;PCDH1;PDGFRB;PPP2R2B;PTCH1;RCAN2;RGS9;S1PR5;SGCD;SH2D2A;SMAD7;SOX13;SPON2;TBX21;WNT1;YPEL

HOXC4;HOXC5;LDB2;LIM2;MSC;MTSS1;NCAM1;NEB;NUAK1;PDGFRB;PPP2R2B;PTCH1;S1PR5;SGCD;SH2D2A;SMAD7;SPON2;TBX21;WNT;

!;SYTL2;ZFYVE2E

2E

2E

!;MSC;MTSS1;NEB;PDGFRB;PPP2R2B;PTCH1;SGCD;SMAD7;TBX21;WNT;

F2R;FASLG;FCRL6;FZD4;GPR114;GPR153;GPR56;GPR68;ITPR1L1;KIR2DL1;KLRD1;KLRG1;LAG3;LGR6;LIM2;MANEAL;NCAM1;NKG7;NMUR1;NPC1;PCDH1;PDGFRB;PTCH1;PTGDR;S1PR5;SCD5;SGCD;SLAMF6;SLAMF7;SLC1A7;SYT11;TIGIT;TM4SF19;VANGL  
;SMAD7;SPON2

HOXC4;HOXC5;LDB2;LIM2;MSC;MTSS1;NCAM1;NEB;NUAK1;PCDH1;PDGFRB;PPP2R2B;PTCH1;PTGDR;RCAN2;RGS9;S1PR5;SGCD;SH2D2A;SMAD7;SOX13;SPON2;TBX21;VANGL1;WNT1;YPEL

D2L1;RHOB;SNCG;TSPO;TSPYL5;USP47;YAP1  
WRN

FOS;HMGA2;HUS1;HYAL3;ITGB1;PIK3R1;PLK3;RGS14;RHOB;RNF168;TIPIN;TRIM32;TSPYL5;UNC119;USF1;USP47;WRN;YAP1

3;PIK3R1;RGS14;TIPIN;TRIM32;UNC119;USF1;USP47;WRN

ERCC6;FANCC;FANCD2;FOXO1;GADD45G;GTF2H3;HMGA2;HUS1;HUS1B;IER3;MAPK3;MASTL;MCM8;MORF4L1;MRE11A;OTUB1;PARG;PARP2;PGAP2;PLK3;POLR2D;PSMB10;PSMB8;PSMB9;PSMD5;PSME2;PTPN11;PYCARD;RAD50;RAD52;RNF168;SFN;SHPRH;SIRT6;SMC1B;SMC3;TIPIN;USP10;USP47;WRN;



TT1H2AD;HIST1H2BK;HIST1H2BO;HIST2H2AB;HMGA2;HUS1;HUS1B;KIFAP3;LRPPRC;MORF4L1;MPHOSPH10;MRE11A;NPM2;NR1H3;NUFIP1;NUP107;NUP160;ORCS;PBRM1;PCGF2;PDS5A;PPP2CA;PRDM7;PRIM2;PTGES3;RAD50;RARA;RBMX;RNF168;SEPT2;SGOL1;SHPRH;SIRT6;SIRT7;SMC1B;SMC3;SPI1;TE

HIST1H2BO;HIST2H2AB;HMGA2;HUS1;HUS1B;MORF4L1;MRE11A;NPM2;NR1H3;NUFIP1;NUP107;NUP160;ORCS;PBRM1;PCGF2;PDS5A;PPP2CA;PRIM2;PTGES3;RAD50;RARA;RBMX;RNF168;SEPT2;SGOL1;SHPRH;SIRT6;SIRT7;SMC1B;SMC3;SPI1;TERF1;TIPIN;TNKS;TTC37;UHRF  
;HOMER3;HTR3B;KCNB1;MAGEE1;NRXN1;PDE2A;RGS14;SRCIN1;ZACN

;GADD45G;GCLC;GPD1L;GRB7;HEXIM2;HHATL;INPP5J;NR1H3;OTUB1;PDCL;PPP2CA;PRNP;PSMB10;PSMB8;PSMB9;PSMD5;PSME2;PYCARD;RARA;RGS14;RGS2;RNF168;SET;SFN;SMAD6;SPI1;SRCIN1;SYNCRIP;THBS1;UBE2  
NAJA2;DRD3;DUSP1;ELANE;EPO;ERCC4;ERCC6;FADD;FANCD2;FKBPL;FOS;FOXO1;GCLC;GPLD1;HMGA2;HPN;HUS1;HYAL3;IGFBP2;INSRR;ITGB1;ITPR1;LTBR;MAP7;MAPK3;MMP2;MSTN;PDE2A;PDIA2;PIK3R1;PKD2L1;PLK3;PRKCE;RGS14;RHOB;RNF168;SDC2;SNCG;ST8SIA1;THBS1;TIPIN;TRIM32;TSC22D3;TSL

;PD1L;HPN;HTR3B;NRXN1;PDE2A;PKD2L1;PLP2;SCN1B;SLC30A4;SLC39A1;SLC39A6;STIM2;TCIRG1;THBS1;WNK2;WNK3

;N;ITGB1;KIAA1462;KRIT1;MTDH;OBSL1;PANX2;PDZD2;RAB13;RPGRIPL1;SCN1B;SDCCAG8;SHROOM2;WNK3  
37;HEXIM2;HHATL;INPP5J;NR1H3;OTUB1;PDCL;PPP2CA;PRNP;PSMB10;PSMB8;PSMB9;PSMD5;PSME2;PYCARD;RARA;RGS14;RGS2;RNF168;SET;SFN;SMAD6;SPI1;SRCIN1;SYNCRIP;UBE2I

;S;PBRM1;PCGF2;RAD50;RARA;RBMX;SGOL1;SIRT6;SIRT7;SMC1B;SMC3;SPI1;TERF1;TIPIN;TNKS;UHRF2

N3;DNAJC2;DPEP3;DRD3;EIF4EBP1;EML4;ERCC4;FANCD2;FBXO43;HAUS2;HMGA2;HSP90AA1;HUS1;ITGB1;MASTL;MCM8;MPHOSPH9;MRE11A;NEK4;NPAT;NPM2;NUP107;NUP160;ORCS;PBRM1;PDS5A;PIWIL2;PLK3;PPP2CA;PRIM2;PSMB10;PSMB8;PSMB9;PSMD5;PSME2;PSRC1;RAD50;RAD52;RANBP2;R

IBMX;SGOL1;SIRT6;SIRT7;SMC1B;SMC3;SPI1;TERF1;TIPIN;TNKS;UHRF2

R3B;KCNB1;MAGEE1;RGS14;SRCIN1;ZACN

;KCN2D;CENPC1;CENPJ;CEP192;CEP76;CLASP2;CLOCK;CSPP1;CYP1A1;DCTN3;DNAJC2;DPEP3;DRD3;DUSP1;EIF4EBP1;EML4;ERCC4;FANCD2;FBXO43;GADD45G;GSPT2;HAUS2;HDAC2;HES1;HEXIM2;HMGA2;HSP90AA1;HUS1;HUS1B;ITGB1;LIN37;MAPK3;MASTL;MCM8;MPHOSPH9;MRE11A;NANOS3;NEK4;N

PF3B;XPOT

PF3B;XPOT

PF3B;XPOT

;EP76;CLASP2;CLOCK;CSPP1;CYP1A1;DCTN3;DNAJC2;DPEP3;DRD3;EIF4EBP1;EML4;ERCC4;FANCD2;FBXO43;HAUS2;HMGA2;HSP90AA1;HUS1;HUS1B;ITGB1;MASTL;MCM8;MPHOSPH9;MRE11A;NEK4;NPAT;NPM2;NUP107;NUP160;ORCS;PBRM1;PDS5A;PIWIL2;PLK3;PPP2CA;PRIM2;PRKCE;PRNP;PSMB10;P  
;PPP2CA;PRNP;PSMB10;PSMB8;PSMB9;PSMD5;PSME2;PYCARD;RGS14;RGS2;SET;SFN;SMAD6;SPI1;SRCIN1;UBE2C

;1A1;DCTN3;DNAJC2;DRD3;EIF4EBP1;EML4;HAUS2;HES1;HMGA2;HSP90AA1;HUS1;ITGB1;LIN37;MASTL;MCM8;MPHOSPH9;NEK4;NPAT;NPM2;NUP107;NUP160;ORCS;PBRM1;PDS5A;PLK3;PRIM2;PSMB10;PSMB8;PSMB9;PSMD5;PSME2;PSRC1;RANBP2;RBL1;RGS14;SDCCAG8;SEPT2;SGOL1;SIRT7;SMAD6;

ASF1B;ATL1;ATP2A1;ATP2B2;ATP6VOA2;ATP6V0B;ATP6V1G2;ATPAF1;ATXN10;ATXN3;AURKAIP1;AZU1;B9D2;BAG5;BAK1;BANP;BAX;BCL3;BIN3;BMPR1B;CACNB2;CAMK2B;CAND1;CASP7;CBX8;CD151;CD3G;CDC23;CDH5;CDK5;CDKN2D;CENPC1;CENPJ;CEP192;CEP68;CEP76;CHRNA3;CIB2;CLASP2;CLICS1;CI

3

PF3B;XPOT

2;FBXO43;HAUS2;HMGA2;MASTL;MPHOSPH9;MRE11A;NEK4;NPM2;NUP107;NUP160;PBRM1;PDS5A;PIWIL2;PPP2CA;PSRC1;RAD50;RAD52;RANBP2;RGS14;RSPH1;SEPT2;SGOL1;SIRT7;SMC1B;SMC3;SPICE1;TERF1;TIPIN;TNKS;UBD;UBE2C;UBE2

CK;CSPP1;CYP1A1;DRD3;EIF4EBP1;FBXO43;GADD45G;HDAC2;HES1;HEXIM2;HMGA2;HUS1;HUS1B;ITGB1;MASTL;MCM8;MRE11A;NANOS3;NPM2;ORCS;PLK3;PRKCE;PRNP;PSMB10;PSMB8;PSMB9;PSMD5;PSME2;PSRC1;PTPN11;RARA;RBL1;RHOB;SERTAD1;SFN;SMAD6;SMC3;SPHK1;SPICE1;TERF1;THBS1;

;GRM4;HOMER3;HTR3B;KCNB1;MAGEE1;NRXN1;NUFIP1;PDE2A;RABAC1;RGS14;SEPT5;SRCIN1;SYPL1;SYPL2;SYT6;SYT9;ZACN

;MORF4L1;NPM2;NR1H3;NUFIP1;PCGF2;PDS5A;RARA;RBMX;SHPRH;SIRT6;SIRT7;SMC3;SPI1;TIPIN;TTC37;UHRF2

.6;STIM2;TRPM4

ADNP2;ADRA1A;AFAP1L2;AGPAT2;AGTRAP;AIPL1;AMOT;AMOTL2;AMPD2;AMPH;ANK2;ANKRD2;ANKRD42;ANO2;ANXA2P2;AP1M2;AP1S3;AP2S1;AP4E1;AP4M1;APLP1;AQP8;AR;ARF5;ARHGAP9;ARHGGEF40;ARL2BP;ARL8A;ARMCX3;ARPC1B;ARRB2;ARSL;ART1;AS3MT;ASCC3;ASF1B;ASL;ASPHD1;ASS1;ATA;ASR;CDK5;CP;DRD3;EFCAB4A;EPO;FTH1;GJA4;GPD1L;HPN;ITPR1;KCNA3;KCNH3;KCNJ12;PDE2A;PKD2L1;PRKCE;SCN1B;SLC24A2;SLC30A4;SLC31A2;SLC39A1;SLC39A6;SLC4A8;SLC9B2;STIM2;TCIRG1;TCN1;TSPO;WNK2;WNK;AT1;FZD9;GABARAP;GNB2;HHATL;INSL3;KPTN;LRPPRC;MAGEE1;MAP6;MAP7;MT1G;MTDH;OBSL1;PDE2A;PRKCE;RAB40C;SEPT2;SERBP1;SET;SNCG;SRFBP1;SYT6;TPD52;TRIM3

ASF1B;ATL1;ATP2A1;ATP2B2;ATP6V0A2;ATP6V0B;ATP6V1G2;ATPAF1;ATXN10;ATXN3;AURKAIP1;AZU1;B9D2;BAG5;BAK1;BANP;BAX;BCL3;BIN3;BMPR1B;CACNB2;CAMK2B;CAND1;CASP7;CBX8;CD151;CD3G;CDC23;CDH5;CDK5;CDKN2D;CENPC1;CENPJ;CEP192;CEP68;CEP76;CHRNA3;CIB2;CLASP2;CLIC5;CI

IUS1;HUS1B;MCM8;MRE11A;NPM2;ORCS;PLK3;PRKCE;PSMB10;PSMB8;PSMB9;PSMD5;PSME2;PSRC1;PTPN11;SMAD6;SMC3;SPICE1;TERF1;TIPIN;UBD;UBE2C;UHRF2;USP4;

3;LUM;MFAP2;SMC3;TNC

K4;NPM2;NUP107;NUP160;PBRM1;PDS5A;PSRC1;RANBP2;RGS14;SEPT2;SGOL1;SIRT7;SMC3;SPICE1;TERF1;TIPIN;TNKS;UBD;UBE2C;UBE2L

HK1;ST8SIA1

2;AGPAT2;AGTRAP;AIPL1;AMOT;AMOTL2;AMPH;ANK2;ANKRD2;ANKRD42;ANO2;ANXA2P2;AP1M2;AP1S3;AP2S1;AP4E1;AP4M1;APLP1;AQP8;AR;ARF5;ARL2BP;ARL8A;ARMCX3;ARPC1B;ARRB2;ARSL;ART1;AS3MT;ASCC3;ASF1B;ASPHD1;ATAD5;ATE1;ATL1;ATMIN;ATP2A1;ATP2B2;ATP6V0A2;ATP6V0B;ATP

MR11;MTMR8;PDE2A;PDE4C;PDE8A;PDP2;PPAP2A;PPM1M;PPP2CA;PTP4A2;PTP4A3;PTPN11;PTPN14;PTPN21;SMPDL3B;SSH3

PF3B;XPOT

2;AGPAT2;AGTRAP;AIPL1;AMOT;AMOTL2;AMPH;ANK2;ANKRD2;ANKRD42;ANO2;ANXA2P2;AP1M2;AP1S3;AP2S1;AP4E1;AP4M1;APLP1;AQP8;AR;ARF5;ARL2BP;ARL8A;ARMCX3;ARPC1B;ARRB2;ARSL;ART1;AS3MT;ASCC3;ASF1B;ASPHD1;ATAD5;ATE1;ATL1;ATMIN;ATP2A1;ATP2B2;ATP6V0A2;ATP6V0B;ATP  
3;HPN;HTR3B;ITPR1;KCNA3;KCNB1;KCNH3;KCNJ12;KCNQ5;PANX2;PDE2A;PKD2L1;SCN1B;SHROOM2;SLC24A2;STIM2;TRPM4;ZACN  
3;HPN;HTR3B;ITPR1;KCNA3;KCNB1;KCNH3;KCNJ12;KCNQ5;PANX2;PDE2A;PKD2L1;SCN1B;SHROOM2;SLC24A2;STIM2;TRPM4;ZACN

HBS1;WNT11

P90AA1;HUS1;ITGB1;MASTL;MCM8;NPAT;ORCS;PLK3;PRIM2;PSMB10;PSMB8;PSMB9;PSMD5;PSME2;RBL1;SDCCAG8;SMAD6;TERF1;TIPIN;TUBA1A;TUBA4A;USP4;

TAD5;ATE1;ATMIN;ATR;ATXN3;AURKAIP1;B9D2;BANP;BARD1;BAX;BCL3;BEX4;C10orf137;C19orf40;CABP1;CAMK2B;CAMKK1;CAND1;CASK;CASP7;CBX8;CCDC19;CCN1;CDC14B;CDC23;CDK5;CDK6;CDKN2D;CDYL;CENPC1;CERS4;CERS6;CITED4;CLOCK;CMAS;CPE;CSE1L;CTNNBIP1;CTNND2;CWC27;DCAF17;D

;CENPC1;CENPJ;CEP192;CHRNA3;CTNNBIP1;DARS;DDX1;DGAT1;DISP1;DNER;DNM1L;DYNC2H1;EIF4EBP1;FADD;FANCC;FHOD3;FUZ;GJA4;GJC1;GNPAT;GPM6B;GPX3;GRB7;HAS3;HAUS2;HES1;HIST1H1C;HIST1H2AD;HIST1H2BK;HIST1H2BO;HIST2H2AB;HMGA2;HSP90AA1;IHH;INPP5J;INTU;ITGB1;KCNA3;K

;ADCK4;ADNP2;ADRA1A;AFAP1L2;AGPAT2;AGTRAP;AIPL1;AMOT;AMOTL2;AMPD2;AMPH;ANK2;ANKRD2;ANKRD42;ANO2;ANXA2P2;AP1M2;AP1S3;AP2S1;AP4E1;AP4M1;APLP1;AQP8;AR;ARF5;ARHGAP9;ARHGEF40;ARL2BP;ARL8A;ARMCX3;ARPC1B;ARRB2;ARSL;ART1;AS3MT;ASCC3;ASF1B;ASL;ASPHD1;A

4A;USP47

;SLC30A4;SPI1;TERF1;TNKS;TSPO;UBE2C;UBE2S;WNK2;WNK3

;T2;AGTRAP;AIPL1;AMOT;AMOTL2;AMPH;ANKRD2;ANKRD42;ANO2;ANXA2P2;AP1M2;AP1S3;AP2S1;AP4E1;AP4M1;APLP1;AQP8;AR;ARF5;ARL2BP;ARL8A;ARMCX3;ARRB2;ARSL;ART1;AS3MT;ASCC3;ASF1B;ASPHD1;ATAD5;ATE1;ATL1;ATMIN;ATP2A1;ATP2B2;ATP6V0A2;ATP6V0B;ATP6V1G2;ATPAF1;ATR;A

DKN2D;COL18A1;CTLA4;DDAH2;DEDD2;DNM1L;DUSP1;EDNRB;EI24;EPO;ERCC6;F3;FADD;FOXO1;GCLC;GPLD1;GRM4;HDAC2;HMGA2;HPN;IER3;INSL3;ITGB1;ITPR1;KRIT1;LTBR;MEIS3;MET;MTCH1;MTDH;NANOS3;NFKBID;NOL3;NOS1AP;OGT;PCGF2;PGAP2;PIK3R1;PLK3;POR;PPP2CA;PRKCE;PRNP;PSMB10;PSM  
T2;AGTRAP;AIPL1;AMOT;AMOTL2;AMPH;ANKRD2;ANKRD42;ANO2;ANXA2P2;AP1M2;AP1S3;AP2S1;AP4E1;AP4M1;APLP1;AQP8;AR;ARF5;ARL2BP;ARL8A;ARMCX3;ARRB2;ARSL;ART1;AS3MT;ASCC3;ASF1B;ASPHD1;ATAD5;ATE1;ATL1;ATMIN;ATP2A1;ATP2B2;ATP6V0A2;ATP6V0B;ATP6V1G2;ATPAF1;ATR;A  
P90AA1;HUS1;ITGB1;MASTL;MCM8;NPAT;ORCS;PLK3;PRIM2;PSMB10;PSMB8;PSMB9;PSMD5;PSME2;RBL1;SDCCAG8;SMAD6;TERF1;TIPIN;TUBA1A;TUBA4A;USP4;

DKN2D;COL18A1;CTLA4;DDAH2;DEDD2;DNM1L;DUSP1;EDNRB;EI24;EPO;ERCC6;F3;FADD;FOXO1;GCLC;GPLD1;GRM4;HDAC2;HMGA2;HPN;IER3;INSL3;ITGB1;ITPR1;KRIT1;LTBR;MEIS3;MET;MTCH1;MTDH;NANOS3;NFKBID;NOL3;NOS1AP;OGT;PCGF2;PGAP2;PIK3R1;PLK3;POR;PPP2CA;PRKCE;PRNP;PSMB10;PSM  
;CDK5;CDKN2D;COL18A1;CTLA4;DDAH2;DEDD2;DNM1L;DUSP1;EDNRB;EI24;EPO;ERCC6;F3;FADD;FOXO1;GCLC;GPLD1;GRM4;HDAC2;HMGA2;HPN;IER3;INSL3;ITGB1;ITPR1;KRIT1;LTBR;MEIS3;MET;MTCH1;MTDH;NANOS3;NFKBID;NOL3;NOS1AP;OGT;PCGF2;PGAP2;PIK3R1;PLK3;POR;PPP2CA;PRKCE;PRNP;  
H3;HMGA2;HUS1;HUS1B;MCM8;MORF4L1;MRE11A;OTUB1;PARP2;POLR2D;RAD50;RAD52;RNF168;SHPRH;SIRT6;SMC1B;SMC3;USP10;USP47;WRN

IK3;HPN;KCNB1;NOV;PLK3;RARA;SDC2;SHROOM2;SNCG;SRCIN1;SRR

AR8;MVP;NUP107;NUP160;NUP88;OIT3;RANBP2;ROGDI;SLC16A3;SUN3;TMEM97;TNKS;XPO1

PRHL1;ADRA1A;AFAP1L2;AGAP7;AGPAT2;AIPL1;AMOT;AMOTL2;AMPD2;AMPH;ANGPTL1;ANK2;ANKRD42;AOC3;AP1M2;AP1S3;AP2S1;AP4E1;AP4M1;APLP1;APOBEC2;AQP8;AR;ARF5;ARHGAP9;ARHGEF40;ARL2BP;ARL8A;ARMCX3;ARPC1B;ARRB2;ARSL;ART1;ARTN;AS3MT;ASB12;ASB14;ASCC3;ASF1B;ASL

L1;SMC1B;SMC3

E;RGS14;SLC24A2;SNCG

2;SGOL1;SMC3;SNCG;SPICE1;SPIN1;TERF1;TNKS

68;SYNCRIP;THBS1;TRMT6;UPF3E

;ERRFI1;GADD45G;GLIS2;HDAC2;HEXIM2;HMGA2;KIAA1244;MAPK3;MASTL;MPHOSPH10;NFIB;NFKBID;PEX19;POR;PPP2CA;PRNP;PSMB10;PSMB8;PSMB9;PSMD5;PSME2;PYCARD;RECK;RGS14;RGS2;SFN;SMAD6;SPOCK3;SRCIN1;TERF1;THBS1;TNKS;TRIM37;UBE2C;USP47;WDFC2;ZC3H12A;ZFP9

;CDK5;CNIH2;CP;CPT1B;DRD3;EPO;FTH1;GPD1L;HPN;HSP90AA1;HTR3B;MFS56;NRXN1;NUP107;NUP160;NUP88;PDE2A;PEX19;PKD2L1;PLP2;RANBP2;SCN1B;SLC15A3;SLC16A3;SLC24A2;SLC30A4;SLC38A1;SLC39A1;SLC39A4;SLC39A6;SLC44A4;SLC4A8;SLC7A10;SLC02B1;SPNS2;STIM2;TCIRG1;THBS1;WNI

;TSPYL1;TSPYL5

2;AGTRAP;AMOT;AMOTL2;AMPD2;AMPH;ANK2;ANKRD2;ANXA2P2;AP1M2;AP1S3;AP2S1;AP4E1;AP4M1;APLP1;ARF5;ARHGAP9;ARL2BP;ARL8A;ARMCX3;ARRB2;ARSI;ART1;AS3MT;ASL;ASPHD1;ASS1;ATL1;ATP2A1;ATP2B2;ATP6V0A2;ATP6V0B;ATP6V1G2;ATPAF1;ATXN10;ATXN3;AURKAIP1;AZU1;B3GNT8  
H1;NFKBID;OGT;PIK3R1;PPP2CA;PRKCE;PYCARD;RHOB;SAV1;SHQ1;SPI1;TERF1;THBS1;TNFRSF12A;TNFSF8;TSPO;UBD;UNC5C;WNT11;ZC3H8

;UBE2C;UHRF2

3;BMPR1B;C10orf137;CAND1;CASK;CBX8;CDK5;CDYL;CITED4;CLOCK;CTNNBIP1;CTNND2;DDX1;DEDD2;DNAJC2;DPPA4;DRD3;EDNRB;EIF1B;EIF2S1;EIF4EBP1;EIF4EBP3;ELF3;ELP2;ENPP7;EPO;ERCC6;ESRRA;ESRRB;FADD;FKTN;FOS;FOXD4L1;FOXO1;FRYL;FSTL3;FUBP3;GCLC;GLIS2;GRB7;GTF2H3;HAS3;HDAC

4P;BCL3;BMPR1B;C10orf137;CAND1;CARD9;CASK;CBX8;CDK5;CDYL;CITED4;CLOCK;CTNNBIP1;CTNND2;DDX1;DEDD2;DNAJC2;DPPA4;DRD3;EDNRB;EIF1B;EIF2S1;EIF4EBP1;EIF4EBP3;ELANE;ELF3;ELP2;ENPP7;EPO;ERCC6;ESRRA;ESRRB;FADD;FKTN;FOS;FOXD4L1;FOXO1;FRYL;FSTL3;FUBP3;GCLC;GLIS2;GRB7;  
AT1;STAT2;TRAFD1;TRIM5;UBE2L4  
NG1;SP100;STAT1;STAT2;TAP1;TRAFD1;TRIM5;UBE2L4

AT1;STAT2;TAP1;TRAFD1;TRIM5;UBE2L4

;RNASEL;SERPING1;SP100;STAT1;STAT2;TAP1;TRAFD1;TRIM5;UBE2L4

AT1;STAT2;TAP1;TRIM5

100;STAT1;STAT2;TGIF1;TRAFD1;TRIM5;UBE2L4

321D1;PARP9;PML;RNASEL;SERPING1;SP100;STAT1;STAT2;TAP1;TRAFD1;TRIM5;UBE2L4

:2L4

;HCAR1;ICAM1;IFI16;IFI35;IRF1;IRF9;MB21D1;NRARP;PARP9;PML;RAB20;RNASEL;SEPT4;SERPING1;SHISA5;SORT1;SP100;SP110;STAT1;STAT2;TAP1;TGIF1;TRAFD1;TRIM38;TRIM5;UBE2L4

:2L4

100;STAT1;STAT2;TGIF1;TRAFD1;TRIM5;UBE2L4

STAT2;TGIF1;TRIM5;UBE2L4

TRAFD1;TRIM38;TRIM5

MB21D1;NRARP;PML;RAB20;RNA5EL;SEPT4;SHISA5;SORT1;SP100;SP110;STAT1;STAT2;TGIF1;TRIM38;TRIM5;UBE2L

SEPT4;SHISA5;SORT1;SP100;SP110;STAT1;STAT2;TGIF1;TRIM38;TRIM5;UBE2L

STAT1;TGIF1;TRAFD1;TRIM21;UBE2L6;WAR

GBP2;GBP4;GBP5;IFI16;IFI35;IRF1;IRF9;LACTB;LAP3;LRRC18;MB21D1;MEX3B;NUDT11;PARP14;PARP9;PML;PSTPIP2;RAB20;RMI2;RNA5EL;SDC3;SEPT4;SERPING1;SHISA5;SMTNL1;SORT1;SP100;STAT1;STAT2;TAP1;TRIM21;TRIM5;UBE2L6;WAR

);ICAM1;IFI16;IFI35;IRF1;IRF9;MB21D1;NRARP;PARP14;PARP9;PML;RAB20;RNA5EL;SEPT4;SERPING1;SHISA5;SMTNL1;SORT1;SP100;SP110;STAT1;STAT2;TAP1;TGIF1;TRAFD1;TRIM21;TRIM38;TRIM5;UBE2L6;WARS;ZNF88

IFI35;IRF1;IRF9;MB21D1;NRARP;PARP14;PARP9;PML;RAB20;RNASEL;SEPT4;SERPING1;SHISA5;SMTNL1;SORT1;SP100;SP110;STAT1;STAT2;TAP1;TGIF1;TRAFD1;TRIM21;TRIM38;TRIM5;UBE2L6;WARS;ZNF88

;IFI16;IRF1;IRF9;LAP3;MEX3B;NRARP;PARP14;PML;RMI2;RNASEL;SDC3;SEPT4;SERPING1;SORT1;SP100;SP110;STAT1;STAT2;TGIF1;TRIM21;TRIM5;UBE2L6;WARS;ZNF88

;L;SDC3;SEPT4;SERPING1;TRIM21;TRIM5;UBE2L6;WAR

PT4;SHISAS;SORT1;SP100;SP110;STAT1;STAT2;TGIF1;TRIM38;TRIM5;UBE2L1  
PT4;SHISAS;SORT1;SP100;SP110;STAT1;STAT2;TGIF1;TRIM38;TRIM5;UBE2L1

ID1;MEX3B;PARP9;PML;PSTPIIP2;RAB20;RNASEL;SDC3;SEPT4;SERPING1;SHISAS;SMTNL1;SORT1;STAT1;STAT2;TAP1;TRIM21;TRIM5;UBE2L6;WAR

F1;TRIM21;TRIM5;ZNF88:

1;ACY2P2;ADAL;ADAP2;ADAR;ADCY4;ADHS;ADK;ADO;ADSL;AFAP1;AFF2;AGA;AGBL2;AGPAT1;AHI1;AKAP13;AKR1C3;ALAS1;ALB;ALDH1A1;ALDH2;ALDH3B1;ALDH9A1;ALDOC;ALG14;ALG5;ALKBH2;ALKBH3;ALOX15B;ALPK3;AMIGO2;AMPD3;ANAPC16;ANAPC4;ANKFY1;ANKRA2;ANKRD37;ANKS1A;ANO7;AN  
1;ACY2P2;ADAL;ADAP2;ADAR;ADCY4;ADHS;ADK;ADO;ADSL;AFAP1;AFF2;AGA;AGBL2;AGPAT1;AHI1;AKAP13;AKR1C3;ALAS1;ALB;ALDH1A1;ALDH2;ALDH3B1;ALDH9A1;ALDOC;ALG14;ALG5;ALKBH2;ALKBH3;ALOX15B;ALPK3;AMIGO2;AMPD3;ANAPC16;ANAPC4;ANKFY1;ANKRA2;ANKRD37;ANKS1A;ANO10;AN  
2;ADAL;ADAP2;ADAR;ADCY4;ADHS;ADK;ADO;ADSL;AFAP1;AGA;AGBL2;AGPAT1;AHI1;AKAP13;AKR1C3;ALAS1;ALB;ALDH1A1;ALDH2;ALDH3B1;ALDH9A1;ALDOC;ALG14;ALG5;ALKBH3;ALOX15B;AMPD3;ANAPC16;ANAPC4;ANKFY1;ANKRA2;ANKRD37;ANKS1A;ANO7;ANP32A;ANPEP;ANXA11;ANXA4;ANXA5  
1;ACY2P2;ADAP2;ADAR;ADHS;ADK;ADO;ADSL;AFF2;AGA;AGPAT1;AHI1;AKAP13;AKR1C3;ALAS1;ALB;ALDH2;ALDH9A1;ALDOC;ALG14;ALG5;ALKBH2;ALKBH3;ALPK3;AMIGO2;ANAPC16;ANAPC4;ANKFY1;ANKRA2;ANKRD37;ANKS1A;ANO7;ANP32A;ANPEP;ANXA11;ANXA5;ANXA7;AP1M1;AP2A1;AP2M1;AP3B1  
2;ADAR;ADHS;ADK;ADO;ADSL;AFF2;AGA;AGPAT1;AHI1;AKAP13;AKR1C3;ALAS1;ALB;ALDH2;ALDH9A1;ALDOC;ALG14;ALG5;ALKBH2;ALKBH3;ALPK3;AMIGO2;ANAPC16;ANAPC4;ANKFY1;ANKRA2;ANKRD37;ANKS1A;ANO7;ANP32A;ANPEP;ANXA11;ANXA7;AP1M1;AP2A1;AP2M1;AP3B1;APC2;APITD1;APLP2;  
1;ACY2P2;ADAP2;ADAR;ADHS;ADK;ADO;ADSL;AFAP1;AFF2;AGA;AGPAT1;AHI1;AKAP13;AKR1C3;ALAS1;ALB;ALDH2;ALDH9A1;ALDOC;ALG14;ALG5;ALKBH2;ALKBH3;ALPK3;AMIGO2;ANAPC16;ANAPC4;ANKFY1;ANKRA2;ANKRD37;ANKS1A;ANO7;ANP32A;ANPEP;ANXA11;ANXA5;ANXA7;AP1M1;AP2A1;AP2M1  
1;ACY2P2;ADAP2;ADAR;ADHS;ADK;ADO;ADSL;AFAP1;AFF2;AGA;AGPAT1;AHI1;AKAP13;AKR1C3;ALAS1;ALB;ALDH2;ALDH9A1;ALDOC;ALG14;ALG5;ALKBH2;ALKBH3;ALPK3;AMIGO2;ANAPC16;ANAPC4;ANKFY1;ANKRA2;ANKRD37;ANKS1A;ANO7;ANP32A;ANPEP;ANXA11;ANXA7;AP1M1;AP2A1;AP2M1;AP3B1  
AL;ADAP2;ADHS;ADK;ADO;ADSL;AGA;AGBL2;AGPAT1;AHI1;AKAP13;ALAS1;ALB;ALDH1A1;ALDH2;ALDH9A1;ALDOC;ALG14;ALG5;ALKBH3;AMPD3;ANAPC4;ANKFY1;ANKRA2;ANO7;ANP32A;ANPEP;ANXA11;ANXA7;ANXA9;AP1M1;AP2A1;AP2M1;AP3B1;APB11P;APC2;APITD1;APOA1;APP;ARAP1;ARAP3;ARC  
L4;ADAP2;ADAR;ADCY4;ADHS;AFAP1;AGA;AHI1;AKAP13;ALB;ALDOC;ALKBH3;AMICA1;AMIGO2;ANAPC4;ANKFY1;ANKRA2;ANKS1A;ANP32A;ANXA11;ANXA7;ANXA9;AP1M1;AP2A1;AP2M1;AP3B1;APC2;APITD1;APLP2;APOA1;APOBEC3C;APP;ARAP1;ARF1;ARF6;ARHGAP1;ARHGAP21;ARHGAP24;ARHGAP2  
HI1;ALAS1;ALB;ALDH2;ALG14;ALG5;ALKBH2;ALKBH3;ANAPC16;ANAPC4;ANKFY1;ANP32A;ANXA11;ANXA7;AP1M1;AP2A1;AP2M1;AP3B1;APC2;APITD1;APOA1;APP;ARAP1;ARCN1;ARF1;ARF3;ARF6;ARFGAP3;ARHGAP21;ARHGEF10;ARID1A;ARL1;ARL6;ARNT;ARSD;ARSG;ASAH1;ASH2L;ATF5;ATF7;ATP55;AT  
HI1;ALAS1;ALB;ALDH2;ALG14;ALG5;ALKBH2;ALKBH3;ANAPC16;ANAPC4;ANKFY1;ANP32A;ANXA11;ANXA7;AP1M1;AP2A1;AP2M1;AP3B1;APC2;APITD1;APOA1;APP;ARAP1;ARCN1;ARF1;ARF3;ARF6;ARFGAP3;ARHGAP21;ARHGEF10;ARID1A;ARL1;ARL6;ARNT;ARSD;ARSG;ASAH1;ASH2L;ATF5;ATF7;ATP55;AT  
3;ACTG1;ACTN1;ACVR1B;ACY2P2;ADAL;ADAP2;ADAR;ADCY4;ADHS;ADK;ADO;ADSL;AFAP1;AFF2;AGA;AGBL2;AGPAT1;AHI1;AKAP13;AKR1C3;ALAS1;ALB;ALDH1A1;ALDH2;ALDH3B1;ALDH9A1;ALDOC;ALG14;ALG5;ALKBH2;ALKBH3;ALOX15B;ALPK3;ALPL;AMICA1;AMIGO2;AMPD3;ANAPC16;ANAPC4;ANKFY1/  
3;ACTG1;ACTN1;ACVR1B;ACY2P2;ADAL;ADAP2;ADAR;ADCY4;ADHS;ADK;ADO;ADSL;AFAP1;AFF2;AGA;AGBL2;AGPAT1;AHI1;AKAP13;AKR1C3;ALAS1;ALB;ALDH1A1;ALDH2;ALDH3B1;ALDH9A1;ALDOC;ALG14;ALG5;ALKBH2;ALKBH3;ALOX15B;ALPK3;ALPL;AMICA1;AMIGO2;AMPD3;ANAPC16;ANAPC4;ANKFY1/  
F6;ARFGAP3;ARHGAP27;ARL1;ATXN2;B4GALT1;BIN2;BLOC1S3;BRPF3;C3;CAMK1D;CAP1;CBL;CCL3;CD14;CD209;CD93;CDC42SE1;CFL1;CLCN5;CLTA;CLTC;CLTCL1;CNN2;COLEC12;COPA;COPB2;COP22;CORO1C;CTNNB1;CUX1;CXCR2;DAB2;DBNL;DENND1A;DNM2;DOCK2;DYSF;EHD1;EHD3;ELMO1;ELMO2;E  
F31;ACTN1;ACVR1B;ADAL;ADAM19;ADAMTSL4;ADAP2;ADAR;ADCY4;ADHS;ADK;ADO;ADPRH;ADRBK2;AFAP1;AFF2;AGA;AGBL2;AHI1;AKAP13;ALAS1;ALB;ALDH1A1;ALDOC;ALKBH2;ALKBH3;ALOX15B;ALPK1;ALPK3;ALPL;AMICA1;AMIGO2;AMPD3;AMY2B;AMZ2;ANAPC4;ANKFY1;ANKRA2;ANKS1A;ANP32A;A  
5;AMPD3;ANAPC4;ANKRA2;ANO7;ANPEP;ANXA7;ANXA9;AP1M1;AP2A1;AP2M1;APB11P;APITD1;APP;ARAP1;ARAP3;ARCN1;ARF1;ARFGAP3;ARHGAP1;ARHGAP24;ARHGAP25;ARHGAP26;ARHGAP30;ARHGAP31;ARHGDI1B;ARHGEF10;ARHGEF11;ARHGEF12;ATP6V1B2;BLOC1S3;BPNT1;BRPF3;BTX;BUB3;C11  
25;ARHGAP26;ARHGAP27;ARHGAP30;ARHGAP31;ARHGDI1B;ARHGEF10;ARHGEF11;ARHGEF12;ARL1;ARL6;BCL6;BRAP;CDC42;CDC42EP4;CFL1;CRKL;CSF1;CTNNAL1;DBNL;DNM2;DOCK2;DOCK5;DOCK6;DOCK8;DOCK9;ELMO1;FBP1;FLCN;GDI2;GIT2;GMIP;GNA12;GNB1;GRB2;HMBOX1;IQSEC1;ITSN1;KSR1;LIM  
9;CD93;CDC42SE1;CLCN5;CLTA;CLTC;CLTCL1;CNN2;COLEC12;CORO1C;CXCR2;DAB2;DBNL;DENND1A;DNM2;DOCK2;EHD1;ELMO1;ELMO2;EPS15L1;FCN1;FKBP15;GRB2;HCK;HFE;HIP1;HNRNPK;IGF2R;ITSN1;LDLRAD3;LILRB1;LRP1;MAGI2;MERTK;MYO7A;NME1;NOD2;PACSN2;PECAM1;PPT1;PTPN1;PTX3;R  
RNT;ASH2L;ATPIF1;B4GALT1;BCL6;BECN1;BLOC1S3;BNIP3;BSG;BTX;BTN3A1;C1RL;C3;C4BBP;CSAR1;CALCOCO2;CAMK1D;CAMK2G;CBFA2T3;CCL3;CD14;CD1C;CD1D;CD209;CD3D;CD44;CD86;CD93;CD97;CDC42;CDH1;CHRN2;CTED2;CLEC4C;CLTA;CLTC;CNN2;COLEC12;CREBBP;CRKL;CRTAM;CSF1;CSF1R;C  
SD;CTS2;CXCR2;DAPK2;GALNS;GBA;GLB1;GM2A;GNS;HCK;HEXB;HGSNAT;HLA-DPA1;IGF2R;KIAA1324;LAMP1;LAPTM5;LIPA;MAN2B2;MANBA;MARCH8;MYO7A;NAAA;NAGA;NBR1;NCF2;NCSTN;NEU1;PLBD2;PPT1;PRCP;PSAP;PSEN1;RAB7A;RNASET2;RRAGB;RRAGC;SFTPB;SIAE;SLC11A1;SLC36A1;S  
ARHGAP21;ARHGAP30;ARHGDI1B;ATP6V0A1;ATP6V0C;ATP6V0D1;ATP6V1B2;BECN1;BICD2;BLOC1S3;BSG;BTX;C3;CACNG8;CAMK2G;CD93;CDC42;CHGA;CLTA;CLTC;CLTCL1;COPA;COPB2;COP22;CRISPLD2;CTNNA1;CTS5;CTS5D;DAB2;DAPK2;DENND1A;DNAJC5;DYSF;ECE1;EHD1;EHD3;ENO1;ERMAP;ESD;F13A  
LDCC;ALKBH3;AP2M1;ATP55;ATPIF1;BCKDHA;BCL2L13;BCO2;BNIP3;BRD8;BSG;C10orf10;C10orf159;C17orf89;C19orf12;C22orf32;C6orf57;C7orf55;CDC42SE1;CHCHD1;CHCHD2;CHCHD6;CHCHD7;CLP3;CLTC;COA5;COQ3;COQ5;COX11;COX17;COX18;COXA5;COXA6;CPOX;CPT1A;CPT2;CS;CTSA;CTSB;CTSD  
F1;ARF3;ARF6;ARFGAP3;ARHGAP21;ARL1;ARL6;ATP55;ATP6V0A1;ATP6V0C;ATP6V0D1;ATPIF1;B3GNT9;B4GALT1;B4GALT4;B4GALT5;BBS4;BCL2L13;BNIP3;BSCL2;BSG;C19orf12;C3orf52;CACNG8;CAMK2G;CANT1;CBFA2T3;CD14;CD1C;CD1D;CD68;CDC42;CERS2;CHCHD6;CHGA;CHMP4B;CHST11;CHST15;C  
11;GM2A;GNS;HCK;HEXB;HGSNAT;HLA-DPA1;IGF2R;KIAA1324;LAMP1;LAPTM5;LIPA;MAN2B2;MANBA;MARCH8;MYO7A;NAAA;NAGA;NBR1;NCF2;NCSTN;NEU1;PLBD2;PPT1;PRCP;PSAP;PSEN1;RAB7A;RNASET2;RRAGB;RRAGC;SFTPB;SIAE;SLC11A1;SLC36A1;SLC48A1;SQSTM1;SRC;TIAL1;TLR9;TM9SF1;TMB  
2;CSF1;CSF1R;CTNNA1;DAB2;DOCK2;EGR1;FLCN;FLT3;FOXP3;G6PD;GAB2;GNAS;GPR183;HAX1;HCLS1;HDAC4;HIPK2;HLA-B;HSPA1B;IKZF1;IL23A;IL4R;JAK3;KAT6A;KLF13;KLF4;LILRB1;LILRB2;MAEA;MAFB;MAPK14;MERTK;MKNK2;MLF1;MMP9;MYB;MYH9;NBEAL2;NCOA6;NCOR1;NFAM1;NFKBIA;NHEJ1;NN  
C;ATPIF1;BCOR;BICD2;BNIP3;BRCA1;CASCS;CASP9;CBX1;CCNK;CDC42;CDC42EP4;CDH1;CFLAR;CTED2;COTL1;CTNNA1;CTNND1;CYB5A;CYFIP1;DENND5A;DNM2;DUSP12;DVL3;DYLL1L1;EGR1;ELL;ENSA;ERCC1;ESR1;FAM58A;FOXO4;FOXP3;FURIN;GCK;GLMN;GNB1;GOLGA5;GRB2;GSK3A;GTF2I;HCLS1;HDAC4  
ARL1;ARL6;BBS4;BCL6;BICD2;BLOC1S3;BNIP3;C11orf73;C1QTNF3;CCL3;CD209;CDC42;CDH1;CHMP4B;CLTA;CLTC;CLTCL1;COPA;COPB2;COP22;CPT1A;CPT2;CTSA;CUX1;DAB2;DAG1;DENND3;DNAJC9;DNM2;DSCR3;EHD1;EHD3;EIF2D;ERC1;ERGC1;FAM160A2;FAM21A;FAM21C;FBXO22;FGF9;FIS1;FD1;G  
3;ALPK3;AMIGO2;ANAPC16;ANAPC4;ANKRA2;ANKRD37;ANKS1A;ANO7;ANP32A;ANXA11;ANXA7;APITD1;APLP2;APOA1;APOBEC3C;ARID1A;ARID3A;ARID3B;ARNT;ASB8;ASH2L;ATF5;ATF7;ATP6V0A1;ATXN2;BASP1;BAZZA;BCAS3;BCCIP;BCL2L13;BCL6;BCL9;BCOR;BCORL1;BECN1;BEX2;BHLHE40;BIVM;BNIP  
3;BCL9;BLOC1S3;BRPF3;BSG;C1QTNF3;C3;C4BBP;CSAR1;C6orf89;CAMK1D;CAP1;CAPZB;CCL3;CD14;CD163;CD44;CDC2;CELA1;CFL1;CFLAR;CNN2;CSF1;CSF1R;CTNNA1;CXCR2;DGKG;DOCK6;DOCK8;DYSF;EHD1;EHD3;EMR2;F11R;F13A1;F2RL2;FOXP3;GBA;GNA11;GNA12;GNA15;GNAI2;GNAS;GNB1;G





1;HK2;INSR;MGAM;NCOR1;PKFB3;PGAM1;PGD;PGK1;PGM1;PHKA2;PYGL;TALDO1;TKI  
5;ATF7;BASP1;BAZ2A;BHLHE40;BNIP3;BRCA1;BRD4;BRD8;BRX1;BRPF3;CALCOCO1;CAMK2G;CARM1;CASC3;CASP6;CBFA2T3;CBX1;CBY1;CCRN4L;CDC5L;CDV3;CENPH;CERKL;CFL1;CFL2;CHCHD1;CHD8;CHEK1;CITED2;CPSF7;CPT2;CREBBP;CRNK1;CSNK2A1;CTDP1;CTDPS2;CTNNB1;CTS8;DAG1;DAP3;DEDD;

\*FKFB3;PGAM1;PGD;PGK1;PGM1;TALDO1;TKI  
49;NME2;PAK1;PLEK;PTPRJ;RAC1;RHOA;SH3YL1;SPRY2;TIRAP;TLN1;WASF2  
.1;CTNNB1;CTNND1;DAG1;FAM129B;HCK;IRF2;ITGA5;LASP1;LIMK1;MAP2K1;MSN;MYH9;NDRG1;PAK1;PNMA1;PPL;PTK2B;PVRL1;PXN;SH3KBP1;STARD8;TJP2;TLN1;TNS3;VASP;VCL;ZY  
\*HB1;FAM21A;FAM21C;FIG4;GOLIM4;HLA-B;HLA-C;HLA-DPA1;HLA-E;HSD17B6;INSR;IRAK2;KIF13A;LAMP1;MARCH8;MYD88;NDRG1;PLEKHB2;PLIN3;PRAF2;RAB11FIP4;RAB23;RAB5B;RAB5C;RIPK1;RUFY1;SCAMP2;SLC11A1;SLC48A1;SNX1;SPG21;STEA3;TLR9;TMBIM1;TPCN2;TSG101;VAMP8;VPS25;WIPI  
3;CERKL;CHEK1;CHKA;CSF1R;CSNK1D;CSNK2A1;DAPK1;DAPK2;DGKG;DYRK4;EIF2AK1;EPHB1;EPHB2;FKBP1A;FLT3;GCK;GSK3A;HCK;HIPK2;HK1;HK2;IGF1R;IGF2R;INSR;IP6K1;IRAK2;ITPK1;JAK1;JAK3;KSR1;LIMK1;LIMK2;LMTK2;LRRK1;MAP2K1;MAP2K3;MAP3K3;MAP3K5;MAP4K4;MAPK13;MAPK14;MAPK1

PRKCD;PSEN1;RAB23;SQSTM1;TBC1D14;TP53INP2;ULK1;VDR;WIPI1;WIPI2  
B1;GM2A;GNS;HEXB;HGSNAT;HLA-DPA1;IGF2R;LAMP1;LAPTM5;MARCH8;MYO7A;NCSTN;NEU1;PLB2D;PSAP;PSEN1;RAB7A;RNASET2;SLC36A1;SLC48A1;TLR9;TM95F1;TMBIM1;TPCN2;TPP1;TXNDC5;VAMP8;VCAN;WIPI1;WIPI2;ZER  
3;CERKL;CHEK1;CHKA;CSF1R;CSNK1D;CSNK2A1;DAPK1;DAPK2;DGKG;DYRK4;EIF2AK1;EPHB1;EPHB2;FKBP1A;FLT3;GCK;GSK3A;HCK;HIPK2;HK1;HK2;IGF1R;IGF2R;INSR;IP6K1;IRAK2;ITPK1;JAK1;JAK3;KSR1;LIMK1;LIMK2;LMTK2;LRRK1;MAP2K1;MAP2K3;MAP3K3;MAP3K5;MAP4K4;MAPK13;MAPK14;MAPK1  
SVIL;TNNC1;TRIOB  
D3;EPHB1;FAM21A;FAM21C;FIG4;GOLIM4;HLA-B;HLA-C;HLA-DPA1;HLA-E;HSD17B6;INSR;IRAK2;KIF13A;LAMP1;MARCH8;MYD88;NDRG1;PLEKHB2;PLIN3;PRAF2;RAB11FIP4;RAB23;RAB5B;RAB5C;RIPK1;RUFY1;SCAMP2;SLC11A1;SLC48A1;SNX1;SPG21;STEA3;TLR9;TMBIM1;TPCN2;TSG101;VAMP8;VPS25;  
;CCL3;CD1D;CD209;CD86;CD93;CFLAR;CREBBP;CXCR7;DAG1;DYNLL1;EIF4A2;EIF4F;EP300;F11R;GRB2;HCK;HIPK2;HLA-B;HLA-C;HNRNP;INSR;ITGA5;KAT5;KPNB1;MAP3K5;NCF2;NFKBIA;NLRX1;NOD2;NUP98;PACS1;PILRA;PRMT6;PSMB2;PVR;PVRL1;RAB11FIP4;RCOR1;RHOA;RPLP0;RXRA;SLC11A1;SPEN;S  
;CCL3;CD1D;CD209;CD86;CD93;CFLAR;CREBBP;CXCR7;DAG1;DYNLL1;EIF4A2;EIF4F;EP300;F11R;GRB2;HCK;HIPK2;HLA-B;HLA-C;HNRNP;INSR;ITGA5;KAT5;KPNB1;MAP3K5;NCF2;NFKBIA;NLRX1;NOD2;NUP98;PACS1;PILRA;PRMT6;PSMB2;PVR;PVRL1;RAB11FIP4;RCOR1;RHOA;RPLP0;RXRA;SLC11A1;SPEN;S  
TNNB1;CXCR2;DOCK2;EGFR1;ELF4;EXOSC3;FKBP1A;FLT3;FOXP3;GAB2;GLMN;GPR183;GRB2;HDAC4;HLA-DPA1;HMOX1;ICOS;IKZF1;IL23A;IL4R;IRS2;ITGAM;JAK3;KLRC4-KLRK1;LAT2;LCP1;LCP2;LILRB1;LILRB2;MERTK;MYB;MYH9;MYO1F;NCOR1;NCSTN;NDRG1;NFAM1;NHEJ1;NOD2;PAK1;PFDN1;PIK3CD;PKN

EK1;CSF1R;CSNK1D;CSNK2A1;DAPK1;DAPK2;DYRK4;EIF2AK1;EPHB1;EPHB2;FKBP1A;FLT3;GSK3A;HCK;HIPK2;IGF1R;IGF2R;INSR;IRAK2;JAK1;JAK3;KSR1;LIMK1;LIMK2;LMTK2;LRRK1;MAP2K1;MAP2K3;MAP3K3;MAP3K5;MAP4K4;MAPK13;MAPK14;MAPKAPK5;MARK2;MARK3;MAST3;MERTK;MKNK1;MKNK2  
TB;ACTG1;ACTN1;ACVR1B;ACYP2;ADAL;ADAMTSL4;ADAP2;ADAR;ADCY4;ADHS;ADK;ADPRH;ADRBK2;ADSL;AFF2;AGA;AGPAT1;AHI1;AKAP13;AKR1C3;ALAS1;ALB;ALDH1A1;ALDH2;ALDH3B1;ALDH9A1;ALDOC;ALG14;ALGS;ALKBH2;ALKBH3;ALOX15B;ALPL;AMICA1;AMIGO2;AMPD3;ANAPC16;ANAPC  
SR1;KIAA0196;KIF13A;LMTK2;MAP2K1;MGRN1;RAB35;RAB7A;SNX1;SNX2;SQSTM1;TRAK1;TSG101;VPS25;VPS35;WAS;WIPI  
J5R1;KIF13A;KIF13C;NAPA;NRBP1;OPN21;RAB8A;SCAMP2;SEC16A;SEC22A;SEC23B;SEC31A;SNX1;STX18;TABP;TRAPP2C;TXNDC5;VAMP2;VAMP8;WIPI1  
8;CHEK1;CREBBP;DNMT3B;EP300;EYA3;FLCN;FOXP3;H2AFY;HDAC4;HMGN3;IKZF1;ING4;JARID2;KAT5;KAT6A;KAT7;KDM2A;KDM3B;KDM4B;KDM5B;KDM6B;MIS18A;MLL2;MSL3P1;MYB;NACC2;NCOR1;NSD1;PAD14;PAF1;PHF21A;PHF8;POLE4;POU5F1;PRKCB;PRKD2;PRMT5;PRMT6;RCOR1;RERE;RTF1;SAP1  
AKAP13;ALB;ALKBH2;ALKBH3;ALOX15B;ALPL;AMPD3;AMY2B;AMZ2;ANKFY1;ANPEP;ANXA11;ANXA4;ANXA5;ANXA7;ANXA9;AOC2;APL2;APOBEC3C;APP;ARAP1;ARAP3;ARFGAP3;ARL1;ARL6;ARSD;ARSG;ASH2L;ATF7;ATP2B4;ATP55;B4GALT1;B4GALT4;B4GALT5;BAZ2A;BCKDH4;BCL6;BCO2;BPNT1;BRAP;BR

LK1;WIPI1;WIPI2  
X1;ITSN1;NME2;NRBP1;PTK2B;PXN;RAC1;RHOA;SRGAP2;SSH1;VASP;WASF2  
G3A;IRS2;ITSN1;MAP2K1;MAPK13;MAPK14;MYD88;NCSTN;NFKB1;NFKBIA;PHLPP1;PREX1;PRKCA;PRKCD;PSEN1;RAC1;RAF1;RALB;RHOA;RPS6KA1;RTN4;SPRY2;SQSTM1;SRC;STAT3;ULK1;VAV1;YWHAH  
M1;AP2A1;AP2M1;AP3B1;APC2;APOA1;APOBR;APP;ARAP3;ARCN1;ARF1;ARF3;ARF6;ARFGAP3;ARHGAP21;ARHGAP27;ARL1;ARL6;ATG7;ATP2B4;ATP55;ATP6V0A1;ATP6V0C;ATP6V0D1;ATP6V1B2;ATXN2;B4GALT1;BBS4;BCL6;BICD2;BIN2;BLOC1S3;BNIP3;BRPF3;BTN3A1;C11orf73;C1QTNF3;C3;CA13;CA14;

KCD;PSEN1;RAB23;SQSTM1;TBC1D14;TP53INP2;ULK1;WIPI1;WIPI2  
rR1;ELF4;EXOSC3;FKBP1A;FLT3;FOXP3;GLMN;GPR183;GRB2;HDAC4;HLA-DPA1;ICOS;IKZF1;IL23A;IL4R;IRS2;ITGAM;JAK3;KLRC4-KLRK1;LAT2;LCP1;LILRB1;LILRB2;MERTK;MYB;MYH9;NCOR1;NCSTN;NFAM1;NHEJ1;NOD2;PAK1;PFDN1;PIK3CD;PKNOX1;PLCG2;POU2F2;PRKCB;PRKCD;PRKCD;PSEN1;PTK2B;PTP  
ELK1;FKBP1A;FOXP3;GAB2;HCK;HLA-B;HLA-C;HLA-DPA1;HLA-E;HMOX1;JFNAR2;JL23A;JL4R;IRAK2;ITGB2;JAK1;JAK3;KIR3DL1;KLRC4-KLRK1;LAT2;LCP2;LILRA1;LILRB1;LILRB2;MAP2K1;MAP2K3;MAPK14;MYB;MYD88;MYO1F;NFAM1;NFKB1;NFKBIA;NLR4;NOD2;PAK1;PIK3CD;PLCG2;POLR3F;PRAM1;PRKCB;F  
APOA1;APP;ARNT;ARSD;ARSG;ASB8;ASH2L;ATG7;ATP6V0D1;ATXN2;B3GNT9;B4GALT1;B4GALT4;B4GALT5;BAZ2A;BCCIP;BCOR;BNIP3;BRCA1;BRD4;BRD8;BRPF3;BTG2;BTX;BUB3;C3;CSAR1;CAMK2G;CAMKK2;CARM1;CAR5;CASC3;CBL;CCL3;CCNB1P1;CCNK;CD44;CDC42;CDKL3;CFL1;CHEK1;CLPX;CNOT4;CC  
AP27;ARHGEF10;ARHGEF11;ARID1A;ARID3A;ARID3B;ARNT;ASCC2;ASH2L;ATF5;ATF7;ATP6V0D1;ATPIF1;BASP1;BAZ2A;BCDIN3D;BCL6;BCL9;BCOR;BCORL1;BHLHE40;BRCA1;BRD3;BRD4;BRD8;BRE;BTG2;BTX;CALCOCO1;CAMK1D;CAMKK2;CAMTA1;CAP1;CARM1;CAS21;CBFA2T3;CBL;CBX1;CBX6;CBY1;CCL3;  
FL1;CFLAR;CNN2;CORO1C;CSF1R;DOCK2;DYNLL1;ELMO1;EPB41;EPB41L3;ERMN;FAM101B;FHDC1;FSCN1;GAS7;GRB2;GSN;HAX1;HCK;HCLS1;IQSEC1;KCNAS5;LCP1;LIMK1;LRP1;MICAL2;MYH11;MYH9;MYL6;MYL6B;MYO1F;MYO7A;NUAK2;PACSIN2;PAFAH1B1;PAK1;PFDN1;PLEK;PPM1F;PREX1;PRKCD;PTK2E  
AP27;ARHGEF10;ARHGEF11;ARID1A;ARID3A;ARID3B;ARNT;ASCC2;ASH2L;ATF5;ATF7;ATP6V0D1;ATPIF1;BASP1;BAZ2A;BCDIN3D;BCL6;BCL9;BCOR;BCORL1;BHLHE40;BRCA1;BRD3;BRD4;BRD8;BRE;BTG2;BTX;CALCOCO1;CAMK1D;CAMKK2;CAMTA1;CAP1;CARM1;CAS21;CBFA2T3;CBL;CBX1;CBX6;CBY1;CCL3;  
\*LP2;APOA1;APP;ARAP1;ARAP3;ARFGAP26;ARHGAP27;ARHGEF10;ARHGEF11;ARID1A;ARID3A;ARID3B;ARNT;ASCC2;ASH2L;ATF5;ATF7;ATG7;ATP6V0D1;ATPIF1;ATXN2;BASP1;BAZ2A;BBS4;BCCIP;BCDIN3D;BCL6;BCL9;BCOR;BCORL1;BHLHE40;BRCA1;BRD3;BRD4;BRD8;BRE;BSC2L;BTG2;BTX;BUB3  
3BP;CXCR7;DAG1;DYNLL1;EIF4A2;EIF4F;EP300;F11R;GRB2;HCK;HIPK2;HLA-B;HLA-C;HNRNP;INSR;ITGA5;KAT5;KPNB1;MAP3K5;NFKBIA;NLRX1;NUP98;PACS1;PILRA;PRMT6;PSMB2;PVR;PVRL1;RAB11FIP4;RCOR1;RHOA;RPLP0;RXRA;SPEN;SRC;STAT3;SVK;TAF4;TAP2;TBC1D20;TGFBI;THOC5;TRIM25;TSG10  
IF6;ARFGAP3;ARL6;ATG7;ATP6V0A1;ATP6V0C;ATP6V0D1;ATP6V1B2;ATXN2;BCL6;BLOC1S3;BTN3A1;C11orf73;C1QTNF3;C3;CA13;CA14;CA3;CA6;CAMK2G;CASC3;CCL3;CD14;CD209;CDC42;CDH1;CHKA;CHMP4B;CHRN2B;CLTA;CLTC;CLTCL1;COG8;COPA;COPB2;COP22;COX18;CPT1A;CPT2;CRTAM;CSF1R;CT  
N1;RAB23;RNF185;SQSTM1;TP53INP2;ULK1;UVRRAG;WIPI1;WIPI2

;ARHGAP26;ARHGAP27;ARHGAP30;ARHGAP31;ARHGDI8;ARHGEF10;ARHGEF11;ARHGEF12;ATPIF1;C6orf170;CDC42SE1;DENND1A;DENND3;DENND5A;DNAJB6;DNMBP;DOCK2;DOCK5;DOCK6;DOCK8;EIF2B3;GDI2;GIT2;GMIP;IQSEC1;ITSN1;MAP4K4;MAPRE3;PLEKHG6;PREX1;RALBP1;RALGAPA2;RAP1GA6  
;ARF3;ARFGAP3;ARHGAP21;ARL1;ATP6V0A1;ATP6V0C;ATP6V0D1;ATP6V1B2;B3GNT9;B4GALT1;B4GALT4;B4GALT5;BNIP3;BSC2L;BSG;C3orf52;CACNG8;CAMK2G;CANT1;CBFA2T3;CDC42;CDC42EP4;CERS2;CHGA;CHST11;CHST15;CHST7;CKAP4;CLCN5;CLTA;CLTC;CLTCL1;COG8;COPA;COPB2;COP22;CUX1;CY  
\*P2;ADAR;ADCY4;ADHS;ADK;ADPRH;ADRBK2;ADSL;AFF2;AGA;AGPAT1;AHI1;AKR1C3;ALAS1;ALB;ALDH1A1;ALDH2;ALDH3B1;ALDH9A1;ALDOC;ALG14;ALGS;ALKBH2;ALKBH3;ALOX15B;AMPD3;ANAPC16;ANAPC4;ANP32A;AOAH;AOC2;APITD1;APLP2;APOA1;APOBEC3C;APP;ARAP1;ARAP3;ARF1;ARF3;ARF6;  
;SLC11A1;SRGAP2;SVK;TLR8

CDH1;CLTA;CLTC;CLTCL1;COPA;COPB2;COP22;CTSA;DAB2;DAG1;DNAJC19;EHD1;EHD3;EIF2D;FGF9;FIS1;FZD1;GCC1;HCLS1;IL23A;IMMP2L;JAK3;KDEL1;KIF13A;KPNB1;LCP1;LTBP2;MAPK14;MFN2;MRPL45;MYO7A;NAPA;NFKBIA;NLRP12;NLRP3;NUP98;NUPL2;NXT1;OPTN;OS9;PACS1;PDCC6;PEX7;PMPCB  
5;ATF7;BASP1;BAZ2A;BCDIN3D;BCL6;BCL9;BCOR;BCORL1;BHLHE40;BRCA1;BRD3;BRD4;BRD8;BTG2;BTX;CALCOCO1;CAMK1D;CAMKK2;CAMTA1;CARM1;CAS21;CBFA2T3;CBL;CBX1;CBX6;CBY1;CCL3;CCNK;CCRN4L;CD3D;CD86;CDC5L;CDH1;CELA1;CELF3;CFLAR;CHD8;CHEK1;CITED2;CNOT1;CNOT4;CREBBP;C  
ALGS;ALKBH2;ALKBH3;ANAPC16;ANAPC4;ANP32A;AOAH;APITD1;APLP2;APOA1;APOBEC3C;APP;ARHGEF11;ARID1A;ARID3A;ARID3B;ARNT;ARSD;ARSG;ASB8;ASCC2;ASH2L;ATF5;ATF7;ATG7;ATP6V0D1;ATXN2;B3GNT9;B4GALT1;B4GALT4;B4GALT5;BASP1;BAZ2A;BCCIP;BCDIN3D;BCL6;BCL9;BCOR;BCORL1;I  
L;SYK;TGFBI;TLN1;VCL  
;ARHGAP26;ARHGAP27;ARHGAP30;ARHGAP31;ARHGDI8;ARHGEF10;ARHGEF11;ARHGEF12;C6orf170;CDC42SE1;DENND1A;DENND3;DENND5A;DNMBP;DOCK2;DOCK5;DOCK6;DOCK8;EIF2B3;GDI2;GIT2;GMIP;IQSEC1;ITSN1;MAP4K4;MAPRE3;PLEKHG6;PREX1;RALBP1;RALGAPA2;RAP1GAP2;RAPGEFL1;RO  
ACYP1;ACYP2;ADAL;ADAM19;ADAMTSL4;ADAR;ADCY4;ADHS;ADK;ADO;ADPRH;ADRBK2;ADSL;AGA;AGBL2;AGPAT1;AKAP13;AKR1C3;ALAS1;ALDH1A1;ALDH2;ALDH3B1;ALDH9A1;ALDOC;ALG1L2;ALGS;ALKBH2;ALKBH3;ALOX15B;ALPK1;ALPK3;ALPL;AMPD3;AMY2B;AMZ2;ANAPC4;ANPEP;AOAH;AOC2;APO  
JCS;VCAN  
42;CHRN2B;COLEC12;CRTAM;ELK1;FOXP3;GAB2;GPR183;GRB2;HCK;HLA-DPA1;HMOX1;ICOS;IKZF1;IL23A;IL4R;IL6R;IRAK2;IRS2;KLRC4-KLRK1;LAT2;LCP2;LILRB1;LILRB2;MAP2K1;MAP2K3;MAPK14;MYB;MYD88;NFAM1;NFKB1;NFKBIA;NLR4;NOD2;PAK1;PIK3CD;PLCG2;POLR3F;PRKCB;PRKD2;PSEN1;PTK2B  
5;ATF7;ATXN2;BASP1;BAZ2A;BCL6;BCL9;BCOR;BCORL1;BHLHE40;BRCA1;BRD3;BRD4;BRD8;BTX;CALCOCO1;CAMK1D;CAMKK2;CAMTA1;CARM1;CAS21;CBFA2T3;CBL;CBX1;CBX6;CBY1;CCL3;CCNK;CCRN4L;CD3D;CD86;CDC42;CDC5L;CDH1;CELA1;CFLAR;CHD8;CHEK1;CITED2;CNOT1;CNOT4;CREBBP;CSNK2  
5;ATF7;ATXN2;BASP1;BAZ2A;BCL6;BCL9;BCOR;BCORL1;BHLHE40;BRCA1;BRD3;BRD4;BRD8;BTX;CALCOCO1;CAMK1D;CAMKK2;CAMTA1;CARM1;CAS21;CBFA2T3;CBL;CBX1;CBX6;CBY1;CCL3;CCNK;CCRN4L;CD3D;CD86;CDC42;CDC5L;CDH1;CELA1;CFLAR;CHD8;CHEK1;CITED2;CNOT1;CNOT4;CNPY2;CF  
IDAC4;ING4;JARID2;KAT5;KAT6A;KAT7;KDM2A;KDM5B;KDM6B;MLL2;MYB;NACC2;NCOR1;NSD1;PAF1;PHF8;POLE4;PRKCB;PRKD2;PRMT5;PRMT6;RCOR1;RTF1;SAP130;SETD1B;SIN3A;SUPT3H;TGFBI;USP22;WDR61;WDR82;YEATS  
L;WDR8

AP2M1;APBB1IP;APOA1;ARAP1;ARAP3;ARHGAP21;ARHGAP23;ARHGAP24;ARHGAP25;ARHGAP26;ARHGAP27;ARHGEF11;ARHGEF12;ARL6;BIN2;BTX;CD14;CD1C;CD1D;CMIP;DAB2;DNM2;DOK3;DYSF;ELMO1;ELMO2;EPB41;ESR1;FABP6;FAM129B;GAB2;GAB3;GPR183;GRB10;HDLBP;HIP1;HSD17B4;IQSEC1  
NUB1;PIM2;PRKCD;PSEN1;TNFRSF11B;TP53INP2;ULK1;UVRRAG  
IDAC4;ING4;JARID2;KAT5;KAT6A;KAT7;KDM2A;KDM5B;KDM6B;MLL2;MYB;NACC2;NCOR1;NSD1;PAF1;PHF8;POLE4;PRKCB;PRKD2;PRMT5;PRMT6;RCOR1;RTF1;SAP130;SETD1B;SIN3A;SUPT3H;TGFBI;USP22;WDR61;WDR82;YEATS

FL1;CFLAR;CNN2;CORO1C;CSF1R;DOCK2;DYNLL1;ELMO1;EPB41;EPB41L3;ERMN;FAM101B;FHDC1;FSCN1;GAS7;GRB2;GSN;HAX1;HCK;HCLS1;IQSEC1;LCP1;LIMK1;LRP1;MICAL2;MYH11;MYH9;MYO1F;NUAK2;PACSIN2;PAFAH1B1;PAK1;PFDN1;PLEK;PPM1F;PREX1;PRKCD;PTK2B;PTPN1;RAC1;RAC2;RHOA;SIF

D;RTF1;SETD1B;WDR61;WDR8;  
D;RTF1;SETD1B;WDR61;WDR8;  
D;CSNK2A1,DAPK1,DAPK2,DYRK4,EIF2AK1;FKBP1A;GSK3A;HIPK2;KSR1;LIMK1;LIMK2;LMTK2;LRRK1;MAP2K1;MAP2K3;MAP3K3;MAP3K5;MAP4K4;MAPK13;MAPK14;MAPKAPK5;MARK2;MARK3;MAST3;MKNK1;MKNK2;NEK3;NEK6;NUAK2;PAK1;PHKA2;PIM1;PIM2;PINK1;PRKACA;PRKCB;PRKCD;PRKDE;PRKDH2;ALDH3B1;ALKBH2;ALKBH3;ALPL;AMICA1;ANKS1A;ANP32A;ANXA4;ANXA5;AP1M1;AP2A1;AP2M1;APBB1P;APC2;APITD1;APLP2;APOA1;APP;ARAP1;ARAP3;ARF1;ARF3;ARF6;ARFGAP3;ARHGAP1;ARHGAP21;ARHGAP23;ARHGAP25;ARHGAP26;ARHGAP27;ARHGAP30;ARHGAP31;ARHGDIB;  
CRTAM;DOCK2;ELK1;ELMO1;FOXP3;GBA;HCK;IFNAR2;IL17RA;IL23A;IRAK2;JAK1;KLF4;KLRC4-KLRK1;LILRB1;MAP2K1;MAP2K3;MAPK13;MAPK14;MEFV;MYD88;MYO1F;NFKB1;NFKBIA;NLR4;NLRP12;NLRP3;NLRP6;NOD2;OSMR;PACS1;PCBP2;POLR3F;PRKCD;PTPN1;PTPN6;PVR;RAC1;RIPK1;RPS6KA1;SAMH AN  
L;AP3B1;APC2;APOA1;APOBR;APP;ARCN1;ARF1;ARFGAP3;ARHGAP21;ARL1;ARL6;ATP2B4;ATP5S;ATP6V0A1;ATP6V0C;ATP6V0D1;ATP6V1B2;ATXN2;B4GALT1;BBS4;BCL6;BICD2;BIN2;BLOC1S3;BNIP3;BRPF3;BTN3A1;C11orf73;C1QTNF3;C3;CA13;CA14;CA3;CA6;CACNG8;CAMK1D;CAMK2G;CAP1;CCL3;CD1  
GB2;KCNAs;MAML1;MAP2K1;MAP2K3;MAP3K5;MAPKAPK5;MICALCL;MSN;NBR1;NEK6;NME1;NOD2;PAK1;PGAM1;PLEK;PRKAB1;PRKACA;PRKCB;PRKCD;PTK2B;PTPN1;PTPN6;PTPRJ;PXN;RAB8A;RAC1;RAF1;SKI;SPDYA;SPRED1;SPRY2;SQSTM1;STAT3;SYK;TBC1D14;TIRAP;TNIP1;TPC2;ULK1;YWHAG;ZC3HC  
;LILRB1;LILRB2;MAP2K1;MAP2K3;MAPK14;MYD88;NFAM1;NFKB1;NFKBIA;NOD2;PAK1;PIK3CD;PLCG2;PRKCB;PRKDE;PSEN1;PTPRJ;RIPK1;RPS6KA1;SPG21;SYK;TIRAP;TLR9;TNIP1;TRAT1;UBE2V1;VASP;WAS;XIAI  
'D14;CD1C;CD1D;CD209;CD3D;CD44;CD86;CD97;CDH1;CLEC4C;COLEC12;CREBBP;CRTAM;CSF1;CSF1R;CTS8;DAPK1;DOCK2;EGR1;ELK1;ENDOU;EP300;EXOSC3;FCAR;FCN1;FKBP1A;FOX3;GAB2;GPR183;GTPBP1;HCK;HFE;HLA-B;HLA-C;HLA-DPA1;HLA-E;HMOX1;HRH2;ICOS;IFNAR2;IGF1R;IL23A;IL4R;IL6R;IR  
ID3A;ARNT;ASH2L;ATG7;ATP6V0D1;BCL9;BECN1;BRCA1;BRD4;BRE;BTG2;C3;CSAR1;CALCOCO1;CAMKK2;CAP1;CBFA2T3;CD3D;CD44;CD86;CDC42;CDH1;CELA1;CELF3;CHD8;CHEK1;CITED2;CNPY2;CPT1A;CREBBP;CSF1;CSF1R;CSNK1D;CTDP1;CTDSP2;CTNNB1;DAB2;DBNL;DISC1;DNM2;DNMT3B;DVL3;ECE1  
FOX3P;GLMN;GRB2;HLA-DPA1;ICOS;IKZF1;IL23A;IL4R;ITGAM;JAK3;KLRC4-KLRK1;LCP1;LILRB1;LILRB2;MYB;MYH9;NCOR1;NCSTN;NHEJ1;NOD2;PAK1;PIK3CD;PKNOX1;PRKDC;PSEN1;PTPN6;RAC1;SEMA4A;SLC11A1;SOD1;SOX4;SRC;SRF;STAT5A;STAT5B;STAT6;SYK;TGFB1;VAV1;WA  
CNK;CDKL3;CERKL;CHEK1;CHKA;CSF1R;CSNK1D;CSNK2A1;CTDP1;DAPK1;DAPK2;DGKG;DPAGT1;DYRK4;EIF2AK1;EIF2B3;EPHB1;EPHB2;FKBP1A;FLT3;GCK;GSK3A;HCK;HIPK2;HK1;HK2;IGF1R;IGF2R;INSR;IP6K1;IRAK2;ITPK1;JAK1;JAK3;KSR1;LIMK1;LIMK2;LMTK2;LRRK1;MAP2K1;MAP2K3;MAP3K3;MAP3K5;M  
'K14;NFKBIA;NME1;PAF1;PTK2B;RCOR1;RNF41;STAT5A;STAT5B;TFE3;THOC5;WDR61  
'N1;BNIP3;BRCA1;BRE;BTG2;C11orf73;CASP9;CCNK;CD44;CDC42;CHCHD6;CHEK1;CITED2;CREBBP;CRKL;CSNK1D;CTDSP2;CTNNA1;CTSD;DAB2;DAP;DBNL;DCLRE1B;DVL3;EEDP1;EGR1;EID3;EIF2AK1;EIF2B3;ELK1;EP300;EPHB1;EXTL3;EYA3;FAM129A;FAM162A;FANCF;FBXO22;FOXN3;FOXO4;FTO;G6PD;GCK  
;MAP2K1;MAP2K3;MAPK14;MYD88;NFAM1;NFKB1;NFKBIA;NOD2;PAK1;PIK3CD;PLCG2;PRKCB;PRKDE;PSEN1;PTPRJ;RIPK1;RPS6KA1;SPG21;SYK;TIRAP;TLR9;TNIP1;TRAT1;UBE2V1;VASP;WAS;XIAI  
CALCOCO1;CASP9;CBL;CDC5L;CDH1;CHD8;CITED2;CTNND1;DAG1;DAP;DAZAP2;DBNL;DENND1A;DNMBP;DYNLL1;ELMO1;ELMO2;ERC1;ETV6;FOXJ2;FZD1;GABRR2;GRB2;HCLS1;HSPA5;INSR;KHDRBS2;KPNB1;LAT2;LILRB1;LIN7B;LRRFIP2;MED12;MLF1;MRPL17;MYD88;MYO7A;NOD2;OSTF1;PINK1;POU2F2;  
2;CHEK1;CREBBP;CSF1R;DPAGT1;DPH5;EP300;EPHB2;FKBP1A;FKBP5;FKBP9;FLCN;FLT3;FOX3P;FURIN;GALNT2;HAX1;HCK;HCLS1;HDAC4;HIPK2;IL23A;IL6R;ING4;INSR;ITGA5;ITGB2;JAK1;JAK3;KATS;KAT6A;KAT7;LMTK2;MAN2A2;MAPK13;MAPK14;MKNK1;NEK6;NOD2;PADI2;PADI4;PAK1;PINK1;POLE4;PPID  
7;BASP1;BAZ2A;BCL6;BCL9;BCOR;BCORL1;BHLHE40;BRCA1;BRD3;BRD4;BRD8;BTX;CALCOCO1;CAMK1D;CAMKK2;CAMTA1;CARM1;CASZ1;CBFA2T3;CBL;CBX1;CBX6;CBY1;CCNK;CCRN4L;CD3D;CD86;CDC5L;CDH1;CELA1;CFLAR;CHD8;CHEK1;CITED2;CNOT1;CNOT4;CREBBP;CSNK2A1;CTNNB1;CTNND1;CUX1;  
STAT5B;STAT6;SYK;TAP2;TGFB1;TNFSF1  
'ARHGAP23;ARHGAP24;ARHGAP25;ARHGAP26;ARHGAP27;ARHGAP30;ARHGAP31;ARHGDIB;ARHGEF10;ARHGEF11;ARHGEF12;ARL1;ATP1F1;BCCIP;BCL2L13;C3;C6orf170;CABLES2;CASP9;CAST;CCL3;CDC42SE1;CFLAR;CLPX;CSNK2A1;CTSA;DBNL;DENND1A;DENND3;DENND5A;DNAJB6;DNMBP;DOCK2;DOCI  
7;BASP1;BAZ2A;BCL6;BCL9;BCOR;BCORL1;BHLHE40;BRCA1;BRD3;BRD4;BRD8;BTX;CALCOCO1;CAMK1D;CAMKK2;CAMTA1;CARM1;CASZ1;CBFA2T3;CBL;CBX1;CBX6;CBY1;CCL3;CCNK;CCRN4L;CD3D;CD86;CDC5L;CDH1;CELA1;CFLAR;CHD8;CHEK1;CITED2;CNOT1;CNOT4;CREBBP;CSNK2A1;CTDP1;CTNNB1;CTI  
SLC11A1;STAT6;TGFB1;TNFSF1  
'PKNOX1;RCOR1;SRF;STAT5A;STAT5B  
'NAJCSB;FKBP5;HSCB;LIMK1;NFKB1;NFKBIA;PPID;UNC45B  
'CALCOCO1;CAMKK2;CAP1;CBFA2T3;CD3D;CD86;CDC42;CDH1;CELA1;CELF3;CHD8;CHEK1;CITED2;CREBBP;CTDP1;CTNNB1;DAB2;DNM2;DVL3;EGR1;ELF4;ELK1;ELL;ELL3;EP300;ESR1;EYA3;FLCN;FOXJ2;FOXO4;FOX3P;FZD1;GLI1;GNAL;GNAS;GSK3A;GTF2F1;GTPBP1;HAX1;HCLS1;HDAC4;HEXB;HIPK2;HIVEP3;H  
'APP;ARHGEF11;ARID1A;ARID3A;ARID3B;ARNT;ASCC2;ASH2L;ASPRV1;ATF5;ATF7;ATXN2;BASP1;BAZ2A;BBS4;BCDIN3D;BCL6;BCL9;BCOR;BCORL1;BHLHE40;BRCA1;BRD3;BRD4;BRD8;BTG2;BTX;C1QTNF3;C3;C4BPB;CALCOCO1;CAMK1D;CAMKK2;CAMTA1;CARM1;CARS;CASC3;CASZ1;CBFA2T3;CBL;CBX1;CE  
'LP2;APOA1;APOBEC3C;APP;ARNT;ARSD;ARSG;ASB8;ASH2L;ATG7;ATP6V0D1;B3GNT9;B4GALT1;B4GALT5;BAZ2A;BTG2;BTX;BUB3;C3;CSAR1;CAMK2G;CAMKK2;CARM1;CBL;CCL3;CCNB1IP1;CCNK;CD44;CDC42;CDKL3;CFL1;CHEK1;CNOT4;COP57A;C  
4;NCOR1;PKNOX1;RCOR1;SRF;STAT5A;STAT5E  
DA1;ATP6V0C;ATP6V0D1;ATP6V1B2;CASP9;CBL;CDC42;CHST11;CITED2;CLTA;CLTC;CSF1R;CTNNB1;DAB2;EGR1;EIF4EBP2;ELK1;EPHB1;EPHB2;EPS15L1;F11R;FBN2;FGF9;FKBP1A;FLCN;FLT3;FOXO4;FRS3;FURIN;FZD1;GAB2;GDF15;GIGYF2;GRB10;GRB2;GSK3A;HIPK2;HSPA5;IGF1R;IGF2R;INSR;IRS2;ITGA5;ITSI  
JD2;PFDN1;PIK3CD;PLCG2;POU2F2;PRKCB;PRKCD;PTK2B;STAT5A;STAT5B;STAT6;SYK;TGFB1;TIRAP;TNFSF1  
PA1B;JAK3;KLF13;LIPA;MAEA;MAFB;MAPK14;MYB;NCOR1;NCSTN;PIK3CD;PKNOX1;RCOR1;SOD1;SRF;STAT5A;STAT5B;TGFB1  
;H2L;ATF5;ATF7;ATXN2;BASP1;BAZ2A;BCL6;BCL9;BCOR;BCORL1;BHLHE40;BRCA1;BRD3;BRD4;BRD8;BTX;C1QTNF3;C3;CALCOCO1;CAMK1D;CAMKK2;CAMTA1;CAP1;CARM1;CASC3;CASZ1;CBFA2T3;CBL;CBX1;CBX6;CBY1;CCL3;CCNK;CCRN4L;CD3D;CD86;CDC42;CDC5L;CDH1;CELA1;CFLAR;CHD8;CHEK1;CITEI  
SP22;YEATS4  
'NLRP3;NLRX1;NOD2;PCBP2;POMC;RAC1;SLC11A1;TGFB1;TLR9;TRIM25;TRIM2  
GAP2;SRGAP2;TBC1D1;TBC1D14;TBC1D19;TBC1D2;TBC1D20;TBC1D2B;TBC1D5;TBC1D8;TBC1D  
2;BUB3;C11orf73;C1QTNF3;CASC3;CDC42;CDH1;CLTA;CLTC;CLTCL1;COPA;COPB2;COP2;COX18;CTNNB1;CTS4;DAB2;DAG1;DNAJC19;EHD1;EHD3;EIF2D;EPB41L3;FGF9;FIS1;FLCN;FZD1;GCC1;HCLS1;IL23A;IMMP2L;JAK3;KDELR1;KIF13A;KPNB1;LCP1;LTBP2;MAGI2;MAPK14;MAPRE1;MFN2;MRPL45;MYO7  
GBA;GLMN;HLA-B;HMOX1;IL17RA;IL23A;IL4R;IL6R;JAK3;KAT5;KLF4;KLRC4-KLRK1;LCP2;LILRB1;LILRB2;LIPA;MAP2K3;MAPK13;MEFV;MYD88;NFAM1;NFKB1;NFKBIA;NLR4;NLRP12;NLRP3;NLRX1;NOD2;NOTCH1;NOTCH2;PCBP2;PIK3CD;POLR3F;POMC;PRKCD;PRKDE;PTAFR;RAC1;RIPK1;SLC11A1;SOD1;STA  
'3;C1RL;C3;C4BPB;CSAR1;CALCOCO2;CAMK1D;CAMK2G;CCL3;CD14;CD163;CD1D;CD209;CD300C;CD44;CD86;CD97;CELA1;CLEC4C;COLEC12;COTL1;CREBBP;CRTAM;CSF1;CSF1R;CSF3R;CTS8;CXCR2;DAPK1;DOCK2;EGR1;ELK1;ELMO1;EMR2;EP300;F11R;FCN1;FOX3P;GBA;HCK;HDAC4;HLA-B;HLA-C;HLA-DPA  
1;SOD1;UGT8  
PHYH;PLOD1;TET  
'ALCOCO1;CAMKK2;CAP1;CBFA2T3;CD3D;CD86;CDC42;CDH1;CELA1;CELF3;CHD8;CHEK1;CITED2;CREBBP;CTDP1;CTNNB1;DAB2;DNM2;DVL3;EGR1;ELF4;ELK1;ELL;ELL3;EP300;ESR1;EYA3;FLCN;FOXJ2;FOXO4;FOX3P;FZD1;GLI1;GNAL;GNAS;GSK3A;GTF2F1;GTPBP1;HAX1;HCLS1;HDAC4;HEXB;HIPK2;HIVEP3;H  
D1A;ARID3A;ARNT;ASH2L;ATG7;ATP6V0D1;BCL9;BECN1;BRCA1;BRD4;BRE;BTG2;C3;CSAR1;CALCOCO1;CAMK1D;CAMKK2;CAP1;CBFA2T3;CCL3;CD3D;CD44;CD86;CDC42;CDH1;CELA1;CELF3;CHD8;CHEK1;CITED2;CNM2;CNPY2;CPT1A;CREBBP;CSF1;CSF1R;CSNK1D;CTDP1;CTDSP2;CTNNB1;DAB2;DBNL;DISC  
TNNA1;CTNALL1;DAPK1;DYNLL2;EPB41;FAM101B;FKBP15;FSCN1;GAS7;GSN;HAX1;HCK;HDAC4;LASP1;LCP1;LSP1;MAEA;MYH11;MYH9;MYL6;MYL6B;MYO1F;MYO7A;PAK1;PGM1;PPP1R12B;RCSL1;SH3PX2B;SPTB;SVIL;TLN1;TNNC1;TPM3;TPM4;TRIOBP;VASP;VCL;WAS;WASF2;ZNF174;ZY  
ND3;DNAJC19;ERGI1;FAM160A2;FGF9;FIS1;FZD1;GCC1;GOSR1;HCLS1;IL23A;IMMP2L;JAK3;JPH4;KIF13A;KPNB1;LMTK2;MAP2K1;MAPK14;MFN2;MGRN1;NFKBIA;NLRP12;NLRP3;NRBP1;NUP98;NUP12;NXT1;OPTN;PACS1;PEX7;PLCG2;PMPCB;POUSF1;PPP1R10;PRKACA;PTK2B;PTTG1IP;RAB23;RAB7A;RBM  
ADAL;ADAM19;ADAP2;ADAR;ADCY4;ADH5;ADK;ADO;ADPRH;ADRBK2;AGBL2;AKAP13;ALAS1;ALB;ALKBH2;ALKBH3;ALOX15B;ALPK1;ALPK3;ALPL;AMPD3;AMY2B;AMZ2;ANKFY1;ANPEP;ANXA11;ANXA4;ANXA5;ANXA7;ANXA9;AO2;APL2;APOBEC3C;APP;ARAP1;ARAP3;ARF1;ARF3;ARF6;ARFGAP3;ARL1;AR  
PHYH;PLOD1;TET  
'CL3;CD14;CD1D;CD44;CD86;CDC42;CHEK1;COLEC12;CRTAM;DAB2;DBNL;DOCK2;DVL3;EIF2AK1;ELK1;ELMO1;EPHB1;EYA3;FOX3P;GBA;HCK;HIPK2;IFNAR2;IGF1R;IL17RA;IL23A;IRAK2;JAK1;KIAA1324;KLF4;KLRC4-KLRK1;LILRB1;LZTS1;MAP2K1;MAP2K3;MAP3K5;MAP4K4;MAPK13;MAPK14;MEFV;MYD88;M  
'CPT1A;CSNK1D;DAB2;DAP;DAPK1;DAPK2;DISC1;DNAJB6;FBP1;FBXO22;FURIN;GAPDH5;GCK;GIT2;GLMN;GMIP;GSK3A;GTPBP1;HDAC4;INSR;IRS2;KIAA1324;LZTS1;MAP2K1;N4BP1;NCOR1;NDEL1;NUB1;PAFAH1B1;PGAM1;PIM2;PREX1;PRKACA;PRKCD;PSEN1;PSME3;PTK2B;RAD23B;RALBP1;RALGAPA2;RG  
;H2L;ATF5;ATF7;ATXN2;BASP1;BAZ2A;BCL6;BCL9;BCOR;BCORL1;BHLHE40;BRCA1;BRD3;BRD4;BRD8;BTX;C1QTNF3;C3;CALCOCO1;CAMK1D;CAMKK2;CAMTA1;CAP1;CARM1;CASC3;CASZ1;CBFA2T3;CBL;CBX1;CBX6;CBY1;CCL3;CCNK;CCRN4L;CD3D;CD86;CDC42;CDC5L;CDH1;CELA1;CFLAR;CHD8;CHEK1;CITEI  
'L51;KHDRBS2;OSTF1;PTTG1;SH3BGR;SH3KBP1;SIRPA;TP53BP2;UVRAG;VASP;ZFP106  
LRB1;MAGI2;MAP2K1;MERTK;NAPA;NOD2;NOTCH1;PACSIN2;PPT1;PRAM1;PTPN1;PTX3;RAB3D;RAB5B;RAB5C;RAC1;RALB;RUFY1;SLC11A1;SYK;TGFB1;VAMP8  
'IGF2R;LDLRAD3;LILRB1;LRP1;MAGI2;PPT1;RAC1;RAMP1;SORL1;ULK1  
PHYH;PLOD1;TET  
ARNT;ARSD;ARSG;ASB8;ASH2L;ATG7;ATP6V0D1;B3GNT9;B4GALT1;B4GALT4;B4GALT5;BAZ2A;BCCIP;BCOR;BRCA1;BRD4;BRD8;BRPF3;BTG2;BTX;BUB3;C3;CSAR1;CAMK2G;CAMKK2;CARM1;CBL;CCL3;CCNB1IP1;CCNK;CD44;CDC42;CDKL3;CFL1;CHEK1;CNOT4;COP57A;COP58;CREBBP;CSF1;CSF1R;CSNK1D;CS  
ARNT;ARSD;ARSG;ASB8;ASH2L;ATG7;ATP6V0D1;B3GNT9;B4GALT1;B4GALT4;B4GALT5;BAZ2A;BCCIP;BCOR;BRCA1;BRD4;BRD8;BRPF3;BTG2;BTX;BUB3;C3;CSAR1;CAMK2G;CAMKK2;CARM1;CBL;CCL3;CCNB1IP1;CCNK;CD44;CDC42;CDKL3;CFL1;CHEK1;CNOT4;COP57A;COP58;CREBBP;CSF1;CSF1R;CSNK1D;CS



4K2G;CHGA;CLTA;CLTC;CLTCL1;COPA;COPB2;COP22;DAB2;DENND1A;DNAJCS;DYSF;FLOT2;HIP1;HLA-B;HLA-C;HLA-DPA1;HLA-E;KIF1B;MARCH8;MYOF;PECAM1;RAB11FIP1;RAB23;RAB43;RAB7A;RAB8A;SEC23B;SEC31A;SH3KBP1;SLC11A1;SNX19;SNX24;SPPL3;SRI;SV2B;SYT2;TMEM67;ULK1;VAMP2;VAMP

1;APP;ARCN1;ARID1A;ARL6;ARNT;ASH2L;ATF5;ATP5S;ATP6V0A1;ATP6V0C;ATP6V0D1;ATP6V1B2;ATP1F1;BASP1;BAZ2A;BBS4;BCCIP;BCKDHA;BCOR;BECN1;BIN2;BLOC1S3;BOD1;BRAP;BRCA1;BRD8;BRE;BRPF3;BUB3;CACNG8;CAMK1D;CAMK2G;CAPZB;CASC3;CASP9;CBL;CBX1;CBX6;CC2D2A;CCNK;CD3D;CDL4;B4GALT5;BSG;CANT1;CBFA2T3;CDC42;CHST11;CHST15;CHST7;CLCN5;CLTA;CLTC;CLTCL1;COG8;COPA;COPB2;COP22;CUX1;DNM2;ERCI1;ERGI1;FIG4;FURIN;GALNT11;GALNT2;GCC1;GCNT7;GOLGA2;GOLGA5;GOLGB1;GOLIM4;GOSR1;HLA-B;HLA-C;HLA-DPA1;HLA-E;KIF13A;MAN2A2;NDST1;NDST2;NOIAI2;GNAL;GNAS;GNAT2;GTPBP1;GTPBP5;INSR;LRRK1;MFN2;MX2;NKIRAS2;NME1;NUDT2;RAB19;RAB23;RAB35;RAB36;RAB3D;RAB40B;RAB42;RAB43;RAB5B;RAB5C;RAB7A;RAB8A;RABL5;RAC1;RAC2;RALB;RHEBL1;RHOA;RRAGB;RRAGC;RRAS2;SEPHS1;SRP54;SRPR;THG1L;ZFHX

RMN;FBXO25;FHDC1;FKBP15;FSCN1;GAS7;GSN;HIP1;LASP1;LCP1;LSP1;MAEA;MAP1S;MEFV;MICAL2;MYH11;MYH9;MYO1F;MYO7A;RCS1D;SPTB;SSH1;SSH2;SVIL;TLN1;TMSB10;TMSB15B;TNNC1;TPM3;TPM4;TRIOBP;VASP;VCL;WAS;WASF2;WIPF2;YWHAIAI2;GNAL;GNAS;GNAT2;GRB10;HCLS1;IGF1R;IRS2;ITGA5;KATS;LRP1;MAX;MLH3;MMP14;NDEL1;NFKBIA;NME1;PAF1;PAFAH1B1;PIK3R5;PTK2B;PTPN1;PXN;RPAIN;SH2B3;SIN3A;SLC27A5;SMURF1;SRC;SYK;TGFB1;TIMP2;TLN1;ULK1;YWHA

ID7;CLPX;COQ3;COX11;COX17;COX18;COX5A;COX6A1;CPOX;CPT1A;CPT2;CS;CYB5A;CYB5R3;CYP27A1;DAP3;DNAJC19;FDX1;FIS1;FUNDCl;GHITM;HAAO;HIBADH;HK1;HK2;IMMP2L1;LRRC59;ME3;MFN2;MICU1;MRP63;MRPL11;MRPL17;MRPL27;MRPL34;MRPL35;MRPL36;MRPL43;MRPL45;MRPL51;MRPS1AC1;RAF1;RALBP1;RIN3;RPH3A;SRGAP2;TRIOBP;ULK1;VCL

DH1;CFL1;CFL2;CNN2;CORO1C;COTL1;CTNNA1;CYFIP1;DAG1;DBNL;DNM2;DYNLL2;EPB41;EPB41L3;ERMN;FAM101B;FBXO25;FHDC1;FKBP15;FSCN1;GAS7;GLI1;GSN;HIP1;KATNA1;KCNAS;KIF1B;LASP1;LCP1;LMTK2;LSP1;MAEA;MAP1S;MAPRE1;MAPRE3;MEFV;MICAL2;MSN;MYH11;MYH9;MYO1F;MYO7A;MARCH8;MYO7A;NCSTN;NEU1;PSAP;PSEN1;RAB7A;SLC36A1;SLC48A1;TLR9;TM9SF1;TMBIM1;TPCN2;VAMP8;WIPI1;WIPI2;ZER

;PSAP;PSEN1;RAB7A;SLC36A1;SLC48A1;TLR9;TM9SF1;TMBIM1;TPCN2;VAMP8;WIPI1;WIPI2;ZER

YOF;NFAM1;P2RX1;PPT1;PSEN1;PTK2B;PTRF;RIPK1;SLC9A1;SPRED1;SRC;TNFRSF1E122;TOMM7;XPO6;XPO7;B3D;RAB7A;RAB8A;RAC1;RAF1;RALBP1;RIN3;RPH3A;SRGAP2;TRIOBP;ULK1;VCL

4;ARHGAP31;ARL6;ATP6V0D1;ATP6V1B2;B4GALT1;BASP1;BBS4;BECN1;BNIP3;BRCA1;C6orf170;CACNG8;CAPZB;CBY1;CC2D2A;CCDC135;CDC42;CDH1;CFL1;CTNNA1;CTNNA1;CTNND1;CYFIP1;DAG1;DBNL;DENND1A;DISC1;DNAH17;DNM2;DYSF;EFHC1;EMR2;EPB41L3;EPHB1;EPHB2;ERMN;EVC;FKBP15;FKL7;COX18;COX5A;COX6A1;CPOX;CPT1A;CPT2;CYB5A;CYB5R3;CYP27A1;DAG1;DNAJC19;FIS1;FUNDCl;GHITM;GRIN2D;HAAO;HAX1;HIPK2;HK1;HK2;IGF2R;IMMP2L1;KPNB1;LRRC59;MFN2;MGST3;MICU1;MRPL17;MRPL45;MRPS14;MRPS23;MRTO4;MX2;MYOF;NDEL1;NDUFA12;NDUFA7;NDUFAB1;NDUFAB4;KATS;KAT6A;KLF7;LPIN2;MAMML1;MAMML3;MAX;MED12;MTF1;NCOA6;NFYC;PHF2;PRKCB;RNF14;RXRA;SAP130;SMARCA2;SMARCD2;SOX4;SUPT3H;TAF11;TAF4;TCF20;THRAP3;TRERF1;USP22;YY

FA3;FOXP3;GLI1;H2AFY;HESX1;HMGN3;HMGN4;JARID2;MBD6;MED12;MLH3;MYB;NCOA6;NCOR1;NOTCH1;NSD1;PAF1;PBX2;PHF21A;PHF8;PLAC8;PRKCB;PRMT5;RCC1;RCOR1;RERE;RXRA;SIN3A;SKI;SRF;TADA2B;TRERF1;TTC5;WDR8

CRNK1;CSNK2A1;CTNNA1;ELF4;ELL;ELL3;EP300;EYA3;FANCF;FOXJ2;FOXN3;FOXO4;FOXP3;GATAD2B;GTF2F1;HAX1;HCLS1;HDAC4;HDGF;HIPK2;HSPA1B;ING4;INTS3;JARID2;KATS;KAT6A;KAT7;KLF4;MAFB;MAMML1;MAMML3;MAX;MED12;MKNK2;MLL2;N4BP1;NACC2;NCOA6;NCOR1;NEK6;NFYC;NR2C1;PAF1

IAI2;GNAL;GNAS;GNAT2;GTPBP1;GTPBP5;INSR;LRRK1;MFN2;MX2;NKIRAS2;NME1;NUDT2;RAB19;RAB23;RAB35;RAB36;RAB3D;RAB40B;RAB42;RAB43;RAB5B;RAB5C;RAB7A;RAB8A;RABL5;RAC1;RAC2;RALB;RHEBL1;RHOA;RRAGB;RRAGC;RRAS2;SEPHS1;SRP54;SRPR;THG1L;ZFHX;IAI2;GNAL;GNAS;GNAT2;GTPBP1;GTPBP5;INSR;LRRK1;MFN2;MX2;NKIRAS2;NME1;NUDT2;RAB19;RAB23;RAB35;RAB36;RAB3D;RAB40B;RAB42;RAB43;RAB5B;RAB5C;RAB7A;RAB8A;RABL5;RAC1;RAC2;RALB;RHEBL1;RHOA;RRAGB;RRAGC;RRAS2;SEPHS1;SRP54;SRPR;THG1L;ZFHX

P8;X12;SNX19;SNX24;SNX27;SNX30;SNX33;TIRAP;WIPI1;WIPI2;ZFVE11;HLA-B;HLA-C;HLA-DPA1;HLA-E;SEC23B;SEC31A;SV2B;SYT2;VAMP2

D2;NUP98;PEX7;PPID;SLC7A5;SRP54;TAP2;TAPBP;TPP1;STAT3;STAT5B;TAF11;THRAP3;VDR;WIPI1;YWHAH1;MSN;PLEK;PTPRJ;RAB35;RAC1;RHOA;SH3YL1;SPRY2;TIRAP;TLN1;TMEM67;VASF1;CHKA;CPOX;CSF1;CSF1R;DYNLL1;ECE1;EIF2AK1;FLT3;FOXP3;G6PD;GOLGA5;GSTA4;HEXB;HM13;HMOX1;HSD17B4;IL6R;IRAK2;KLRC4-KLRK1;LILRB1;MAP3K5;MAX;MTERFD3;MYH9;NACC2;NAGA;NFKB1;NLRC4;NR2C1;NRBP1;PAFAH1B1;PCYT1A;PDCD6;PEX7;PLEK;PLOD1;PRKRA;PVRL1;PYGL;RAB11FIP4;SE

AP2K3;MERTK;PRKCD;PTK2B;SRC;SYK;TP53RK;TRIM27;H2D3C;SH3BGR;SLA;SOCS2;SRC;TIRAP;TP53BP2;TRAT1

LT4;B4GALT5;BSG;CANT1;CBFA2T3;CDC42;CHST11;CHST15;CHST7;CLCN5;CLTA;CLTC;CLTCL1;COG8;COPA;COPB2;COP22;CUX1;DNM2;DNMBP;ERCI1;ERGI1;FIG4;FURIN;GALNT11;GALNT2;GCC1;GCNT7;GOLGA2;GOLGA5;GOLGB1;GOLIM4;GOSR1;HLA-B;HLA-C;HLA-DPA1;HLA-E;IGF2R;KIF13A;MAN2A2;MNAETTL6;MLL2;N6AMT1;N6AMT2;NSD1;PRMT5;PRMT6;SETD1B;SETDB1;SETMAR;TFB2M;THUMP2D;TRMT11;TRMT61B;WDR13B;ENO1;EP300;ERF;FOXP3;GMEB1;GTF2F1;HDAC4;HDGF;HIPK2;ING4;KATS;KAT6A;KDM5B;KLF4;KLF7;LPIN2;MAMML1;MAMML3;MAX;MED12;MTF1;NACC2;NCOA6;NCOR1;NFYC;NOTCH1;NSD1;PHF2;PHF2;PRKCB;RNF14;RXRA;SAP130;SIN3A;SKI;SMARCA2;SMARCD2;SOX4;SPEN;SRF;SRF2;SUPT3H;TAF11







4CM2;MLL;MPHOSPH8;NASP;NCAPD2;NCAPD3;NCAPG2;PHF13;PYGO2;RBBP4;RNF20;RNF8;SMARCA4;TAF1;TP53BP1;UHRF:  
KLE2;APBB1;ATM;AXIN2;BCL2;BID;BIRC6;BLM;BRD7;BRSK2;BTRC;C14orf82;CALR;CAPN3;CASP2;CCND1;CCNF;CDC16;CDC25B;CDK5RAP2;CDKN2A;CDKN2B;CENPN;CENPO;CEP164;CEP72;CHD3;CHEK2;CIT;CKAP5;CNTRL;CRADD;CSNK1E;CSNK2A2;CSR2BP;CTCF;CUL1;CUL4A;DCTN1;DDB1;DDIT3;DHCR24;D  
CTR8;ACVR1;ADCY6;ADCY7;ADSS;AGK;AGMAT;AGPAT3;AGPAT6;AK2;AK5;AKAP17A;AKNA;AKT2;ALAD;ALDH18A1;ALDH7A1;ALHG;ALG9;ALX3;AMACR;AP3D1;APBB1;ARG1;ARHGAP35;ARID1B;ARNTL2;ASB1;ASCC1;ASMT;ASPDH;ASXL1;ATF6B;ATG10;ATIC;ATM;ATN1;ATP1A1;ATP1A3;ATP2A2;ATP2A3;ATP5  
1;FOXM1;FRMD4A;GATA3;HTT;JAM3;KANK1;MACF1;MAP4;NCKAP1L;NDC80;NUMA1;PARVA;PTK2;SCRIB;SFRP5;SPN;SYNE2;VANGL2;ZW1  
51D;RBBP4;RFC1;SMARCA4;SMARCAL1;TOP2B;XRCC3;XRCC5;XRCC6  
IO80;MACF1;MDN1;MLH1;MSH6;MYO9B;PMS2;PMS2P5;PSMC4;PSMD6;WRNIP1  
ACE;ACLY;ACO2;ACOX2;ACOX3;ACSL5;ACTR8;ACVR1;ADAM11;ADAM23;ADAMTS10;ADAMTS17;ADAMTS4;ADAT1;ADCY3;ADCY6;ADCY7;ADCY9;ADD1;ADPGK;ADSS;AFG3L2;AGAP5;AGAP6;AGBL5;AGK;AGMAT;AGXTL2;AIF1;AIFM1;AIFM2;AK2;AK5;AKAP8;AKT2;AKT3;ALAD;ALDH18A1;ALDH6A1;AMFR;AV

3;UHRF1;ZMIZ2  
RCSS;XRCC6  
;DNAH1;DNM1;DST;DYN1C1H1;DYN1C12;DYN1C1L1;DYN1L1;EMD;EML3;FKBP4;HAUS5;HSPH1;INCENP;INO80;INVS;KIF13B;KIF16B;KIF21B;KIF3B;KIF4A;KIF5C;KLC1;KLC2;KNTC1;LZTS2;MACF1;MAP1A;MAP1L3B2;MAP4;MAPRE2;MAP7;MID2;NAV1;NEIL2;NICN1;NINL;NUMA1;ODF2;PCNT;POLB;PRC1;RACGA  
SRP;KIF5C;MAGOH;MYO1C;NUP133;NUP155;NUP188;NUP205;NUP210;NUP214;NUP62;NUP93;NXF1;POM121;POM121C;RNP51;SEH1L;SIDT1;SIDT2;SMG6;SRRM1;SRF5;THOC1;THOC2;TSC1;U2AF  
RBBP4;RBBP7;RNF8;RUVBL1;SATB1;SCMH1;SMARCA4;SMARCC1;SMARCC2;SMARCD1;SMARCD3;SMARCE1;SUPT4H1;SUPT6H;TTF1  
HOSPH8;MSH6;NCAPD3;NFRKB;NR1D1;PHC1;POG2;RBBP4;RUNX2;RUNX3;RUVBL1;SATB1;SLX4;SMARCA4;SMARCD3;SOX18;TBP;TCF3;TCF7L2;TCP1;TIMELESS;TNKS1BP1;TP53;UBE2B;UHRF  
;CENPN;CENPO;CHD1L;CHD3;CHD4;CHD6;CSR2BP;CTCF;CTR9;DNMT1;DNMT3A;EHMT1;EP400;GATA3;GTF3C4;H3F3C;HCF1;HDAC1;HIST1H2AC;HIST1H2AK;HIST1H2BN;HIST2H2AC;HIST2H2BE;HIST2H3D;HLCS;HMG20A;HMGA1;HP1BP3;HUWE1;ING2;ING5;INO80;KAT6B;KDM1A;KDM2B;KDM4A;KDM4  
I3A2;ALDH5A1;ALDH6A1;ALDH7A1;APOOL;ATPSA1;ATP5B;ATP5J;ATP5J2;BAD;BCL2;BDH1;BID;BIK;BLOC1S1;BR13BP;CHCHD3;COX10;COX15;COX5B;COX8A;CYB5B;D2HGDH;DARS2;DHODH;DLID;DLST;DNAJA3;DNAJC1;EARS2;EFHD1;ETFDH;ETHE1;EXOG;FH;FXN;GARS;GLS2;GLUD1;GOT2;GPT2;GRAMD4;G  
AP17A;AKNA;AKT2;ANAPC1;ANAPCS;ANAPC7;ANK3;ANKLE2;APBA1;APBA2;APBB1;APOBEC3F;ARHGAP35;ARID1B;ARNTL2;ASB1;ASCC1;ASXL1;ATG10;ATN1;ATP8B1;ATXN1L;AVPR2;AXIN1;AXIN2;BAHD1;BAZ1B;BBS2;BCL10;BCL11B;BCL2;BCL9L;BEX1;BLM;BMP2;BPTF;BRD2;BRD7;BRPF1;BTRC;C14orf169;C  
LME2;ERCC3;ERCC5;FAN1;FANCI;FEN1;FOXM1;FZR1;GADD45A;HERC2;HMGA1;HUWE1;INO80;LIG1;LIG3;LOC100133315;MAD2L2;MDC1;MLH1;MMS19;MSH6;NEIL2;NFRKB;NONO;PALB2;PAPD7;PARP1;PAXIP1;PMS2;PMS2CL;PMS2P5;POLA1;POLB;POLE;POLG;POLH;POLR2B;POLR2C;POLR2J;PRPF19;RA  
ACACB;ACAD8;ACER2;ACER3;ACOX2;ACOX3;ACSL5;ACVR1;ADAM11;ADAM23;ADAMTS17;ADAMTS4;ADAT1;ADCY3;ADCY6;ADCY7;ADCY9;ADPGK;ADSS;AFG3L2;AGBL5;AGK;AGMAT;AGPAT3;AGPAT6;AGXT2L2;AHCYL2;AIFM1;AIFM2;AK2;AK5;AKT2;AKT3;ALAD;ALDH18A1;ALDH1B1;AI

CH;MYO1C;NUP133;NUP155;NUP188;NUP205;NUP210;NUP214;NUP62;NUP93;NXF1;POM121;POM121C;RNP51;SEH1L;SIDT1;SIDT2;SMG6;SRRM1;SRF5;THOC1;THOC2;TSC1;U2AF  
CH;MYO1C;NUP133;NUP155;NUP188;NUP205;NUP210;NUP214;NUP62;NUP93;NXF1;POM121;POM121C;RNP51;SEH1L;SIDT1;SIDT2;SMG6;SRRM1;SRF5;THOC1;THOC2;TSC1;U2AF  
CH;MYO1C;NUP133;NUP155;NUP188;NUP205;NUP210;NUP214;NUP62;NUP93;NXF1;POM121;POM121C;RNP51;SEH1L;SIDT1;SIDT2;SMG6;SRRM1;SRF5;THOC1;THOC2;TSC1;U2AF  
S;TARS;YARS  
S;TARS;YARS  
I;ALAD;ALDH5A1;ALMS1;ALS2CL;AMFR;AMIGO1;ANAPC1;ANAPC13;ANAPCS;ANAPC7;ANK3;ANKLE2;ANXA2;AP2B1;AP3D1;APBA1;APBB1;ARG1;ARHGAP15;ARHGAP35;ARHGAP39;ARHGEF1;ARHGEF16;ARHGEF18;ARHGEF4;ARHGEF5;ARHGEF6;ARHGEF7;ARID1B;ARL3;ARPC2;ARPC3;ASXL1;ATG13;ATG14;  
H2;BAHCC1;BAHD1;BATF;BATF3;BCL11B;BCL2;BLM;BPTF;BRD7;BRPF1;C1D;CALR;CAMTA2;CBX2;CC2D1B;CCN1;CDK5RAP2;CDKN2A;CHD1L;CHD2;CHD3;CHD4;CHD6;CHTF8;CIC;CIITA;CRAMP1L;CREB3L2;CREM;CRY2;CSRNP2;CTC1;CTCF;CXK5;DDB1;DDIT3;DDX20;DFFB;DHX3;DHX9;DNAJC1;DNMT1;DNM  
T3J3;GAR1;GEMIN4;HEATR1;INTS1;INTS4;INTS7;INTS9;KARS;LAS1L;NOL9;NOLC1;NOP10;NOP14;NSUN2;NSUN4;PA2G4;PDCD11;POP1;PUS3;QTRTD1;RPP14;RPP21;RRP1B;SARS;SMAD3;SRRT;TRIT1;TSR2;TYW1;UTP14A;UTP20;WBP11;WDR4;WDR55;ZCCHC1  
'ARS  
POLR2B;POLR2C;POLR2J;POLR3A;POLR3C;RPRD1B;TAF1;TAF10;TAF3;TAF6;TAF8;TBP;TP53;TRRA  
POLR2B;POLR2C;POLR2J;POLR3A;POLR3C;RPRD1B;TAF1;TAF10;TAF3;TAF6;TAF8;TBP;TP53;TRRA  
GEF3;ARHGEF4;ARHGEF5;ARHGEF6;ARHGEF7;ARHGEF9;CDC42BPB;CDC42BPG;CIT;CYTH1;CYTH3;DENND2D;DENND4B;DNAJA3;DOCK10;DOCK9;EIV5L;FGD1;GBF1;HERC1;KALRN;MADD;MCF2L;MINK1;MYO9B;NCKAP1L;NET1;OBSCN;OCLR;PLEKHG2;PSD4;RAB3GAP1;RABGAP1;RALGDS;RANBP1  
3;TCF7;UNG;XRCC6  
POLR2B;POLR2C;POLR2J;POLR3A;POLR3C;RPRD1B;TAF1;TAF10;TAF3;TAF6;TAF8;TBP;TP53;TRRA  
AD;ALDH18A1;ALX3;APBB1;ARHGAP35;ARID1B;ARNTL2;ASCC1;ASMT;ASPDH;ASXL1;ATF6B;ATIC;ATN1;ATP1A1;ATP1A3;ATP2A2;ATP2A3;ATPSA1;ATPSB;ATPSJ;ATPSJ2;ATP8B1;ATXN1L;AVPR2;AXIN1;BACH2;BAHD1;BATF;BATF3;BAZ1B;BCL10;BCL11B;BCL9L;BEX1;BLM;BMP2;BPTF;BRD2;BRD7;BRPF1;BTRC  
PF4;SRM2;TGS:  
IN4;GNL2;GNL3L;GTPBP4;HEATR1;LAS1L;LSG1;NOL9;NOLC1;NOP10;NOP14;NSUN4;PA2G4;PDCD11;RCL1;RRN3;RRP1B;SDAD1;TSC1;TSR1;TSR2;UTP14A;UTP20;WBP11;WDR55;ZNHT  
ATM;BCL2;BID;BIRC6;BLM;BRD7;BRSK2;CALR;CASP2;CCND1;CCNF;CDC16;CDC25B;CDK5RAP2;CDKN2A;CDKN2B;CENPN;CENPO;CEP164;CEP72;CHD3;CHEK2;CIT;CKAP5;CNTRL;CRADD;CSNK1E;CUL1;CUL4A;DCTN1;DMWD;DYN1C1H1;DYN1C12;DYN1L1;FEN1;FHL1;FLNA;FOXM1;FZR1;GINS4;HAUS5;HGF;HYA  
1;ARHGAP15;ARHGAP29;ARHGAP35;ARHGEF16;ARHGEF5;ARHGEF6;ARHGEF7;ARID1B;ARNTL2;ASCC1;ASXL1;ATN1;ATP8B1;ATXN1L;AVPR2;AXIN1;AXIN2;BAHD1;BAZ1B;BCL10;BCL11B;BCL9L;BEX1;BLM;BMP2;BPTF;BRD2;BRD7;BRPF1;BTRC;C14orf169;C1D;CALM3;CALR;CAMTA2;CAND2;CAPN3;CARD11;C

'1;UHRF1  
C25B;CDK5RAP2;CDKN2A;CDKN2B;CEP164;CEP72;CHEK2;CKAP5;CNTRL;CRADD;CSNK1E;CUL1;CUL4A;DCTN1;DYN1C1H1;DYN1C12;FEN1;FHL1;FOXM1;FZR1;GINS4;HYAL1;ING5;INO80;KHDRBS1;KLF11;KRT7;LIG1;LSM10;MCM2;MCM3;MCM4;MCM6;MTA3;MYC;NINL;NUMA1;ODF2;PCM1;PCNT;PKD1;POLA  
1;HSP90B1;HYOU1;KDELRL3;MBTPS1;PDIA5;PDIA6;SHC1;SREBF2;SYVN1;TATDN2;TP53;TSPYL2;VCP;XBP  
33;ARHGAP35;ARHGEF1;ARHGEF16;ARHGEF18;ARHGEF3;ARHGEF4;ARHGEF5;ARHGEF6;ARHGEF7;ARHGEF9;AXIN1;AXIN2;CDC42BPB;CDC42BPG;CIT;CYTH1;CYTH3;DENND2D;DENND4B;DNAJA3;DNAJC1;DOCK10;DOCK7;DOCK9;EIF2B1;EIV5L;FGD1;GBF1;GRPEL1;HERC1;HERC2;HMHA1;IP05;K

AP17A;AKNA;ALAD;ALDH7A1;ALX3;APBB1;ARG1;ARHGAP35;ARID1B;ARNTL2;ASCC1;ASMT;ASPDH;ASXL1;ATF6B;ATIC;ATN1;ATP1A1;ATP1A3;ATP2A2;ATP2A3;ATPSA1;ATPSB;ATPSJ;ATPSJ2;ATP8B1;ATXN1L;AVPR2;AXIN1;BACH2;BAHD1;BATF;BATF3;BAZ1B;BCL10;BCL11B;BCL9L;BEX1;BLM;BMP2;BPTF;BR  
2AK3;EIF2AK4;GOSR2;HSP90B1;HYOU1;KDELRL3;MBTPS1;PDIA5;PDIA6;SHC1;SYVN1;TATDN2;TP53;TSPYL2;VCP;XBP  
V1;AKT2;ALDH1B1;ALDH5A1;ALDH6A1;ALDH7A1;AMACR;AMBRA1;AMFR;ANAPC1;ANAPCS;ANAPC7;APOBEC3F;ARG1;ARHGAP15;ARHGAP29;ARHGAP35;ARHGEF16;ARHGEF5;ARHGEF6;ARHGEF7;ARIH2;ASPDH;ATG10;ATG13;ATG14;ATG3;ATG9B;ATM;ATPSA1;ATPSB;ATPSJ;ATPSJ2;ATP6V1H;ATP8B1;AT  
8B1;ATP8B2;BAD;BLM;CARNS1;CHD1L;ENTPD5;HSPD1;INO80;MACF1;MDN1;MLH1;MSH6;MYO9B;NDUFS1;PMS2;PMS2P5;PSMC4;PSMD6;WRNIP  
DD1;AGAP5;AGAP6;AHS1;AKAP17A;AKNA;AKT2;ANAPC1;ANAPCS;ANAPC7;ANKLE2;APBB1;ARHGAP15;ARHGAP29;ARHGAP35;ARHGEF16;ARHGEF5;ARHGEF6;ARHGEF7;ARID1B;ARNTL2;ASB1;ASCC1;ASXL1;ATG10;ATN1;ATP8B1;ATXN1L;AVPR2;AXIN1;AXIN2;BAD;BAHD1;BAZ1B;BCL10;BCL11B;BCL2;BCL5

CH;MYO1C;NUP133;NUP155;NUP188;NUP205;NUP210;NUP214;NUP62;NUP93;NXF1;POM121;POM121C;RNP51;SEH1L;SIDT1;SIDT2;SLC25A42;SLC35B1;SLC35D1;SMG6;SRRM1;SRF5;THOC1;THOC2;TSC1;U2AF  
I;DDX46;DDX47;DDX6;DHX15;DHX16;DHX35;DHX38;DHX9;EDC3;EDC4;EFTUD2;EIF4A3;EIF4B;EIF4G1;ELAVL1;ERCC3;EXOSC10;FAM103A1;FIP1L1;GEMIN4;GEMINS;GPATCH1;HNRNPA0;HNRNPA2B1;HNRNPA3;HNRNPH1;HNRNPM;HNRNPR;HNRNP;HSPA8;KHDRBS1;KHSRP;KIAA1429;LEO1;LOC10013093;  
I;ASXL1;ATF6B;ATN1;ATP8B1;ATXN1L;AXIN1;BACH2;BAHD1;BATF;BATF3;BAZ1B;BCL10;BCL11B;BCL9L;BEX1;BLM;BMP2;BPTF;BRD2;BRD7;BRPF1;BTRC;C14orf169;C1D;CALR;CAMTA2;CAND2;CAPN3;CARD11;CBFA2T2;CBX2;CBX5;CBX7;CCAR1;CCN1;CD3EAP;CDH13;CDK5RAP2;CDKN2A;CDKN2B;CDON;CEI  
C25B;CDK5RAP2;CDKN2A;CDKN2B;CEP164;CEP72;CHEK2;CKAP5;CNTRL;CRADD;CSNK1E;CUL1;CUL4A;DCTN1;DYN1C1H1;DYN1C12;FEN1;FHL1;FOXM1;FZR1;GINS4;HYAL1;ING5;INO80;KHDRBS1;KLF11;LIG1;LSM10;MCM2;MCM3;MCM4;MCM6;MTA3;MYC;NINL;NUMA1;ODF2;PCM1;PCNT;PKD1;POLA1;POL  
C;CDK5RAP2;CDKN2A;CDKN2B;CHEK2;CRADD;CSNK2A2;CUL1;CUL4A;DDB1;DDIT3;DHCR24;DST;DTL;EIF4G2;ERCC3;ETS1;FHL1;FOXM1;FZR1;GADD45A;GATA3;HDAC1;HEXIM1;HTRA2;INCA1;ING5;INTS7;KHDRBS1;KNTC1;MACF1;MAD2L1BP;MAD2L2;MAP2K6;MCM2;MCM3;MCM4;MCM6;MDC1;ME  
;DDX6;DHX15;DHX35;DHX38;DHX9;DKC1;DRG1;EDC3;EDC4;EEF2;EFTUD2;EIF2AK4;EIF4A3;EPRS;G3BP1;GAR1;GCN1L1;GEMIN4;GEMINS;GPATCH1;GTF3C1;HEATR1;HNRNPA0;HNRNPA2B1;HNRNPA3;HNRNPAB;HNRNPH1;HNRNPM;HNRNPR;HNRNP;HSPA8;ILF2;ILF3;KHSRP;LARP7;LOC100130932;LSM10  
J1;KDELRL3;MBTPS1;PDIA5;PDIA6;RHBD1;SHC1;SYVN1;TATDN2;TSPYL2;VCP;XBP  
IP17A;AKNA;ALAD;ALDH18A1;ALX3;AMACR;APBB1;ARHGAP35;ARID1B;ARNTL2;ASCC1;ASMT;ASPDH;ASXL1;ATF6B;ATIC;ATN1;ATP1A1;ATP1A3;ATP2A2;ATP2A3;ATPSA1;ATPSB;ATPSJ;ATPSJ2;ATP8B1;ATXN1L;AVPR2;AXIN1;BACH2;BAHD1;BATF;BATF3;BAZ1B;BCL10;BCL11B;BCL9L;BEX1;BLM;BMP2;BPTF;B  
RHGEF6;ARHGEF7;ARHGEF9;CCR7;DOCK7;EPHA1;EPHA2;FGD1;FOXJ1;GPR55;KALRN;KANK1;KCTD13;MCF2L;MTOR;MYO9B;NCKAP1L;NET1;OBSCN;OCLR;PLEKHG2;PTK2;RASGRF2;SCRIB;SYDE1;TAX1BP3;TBCL1D7;TIAM1;TNFAIP1;TRIO;TSC1;VAV  
16;ARHGEF5;ARHGEF6;ARHGEF7;AXIN1;AXIN2;BAD;BMP2;CALM3;CALR;CASP1;CCR7;CDKN2A;CUL7;DCTN1;DDIT3;DNAJA3;DNAJC1;DOCK7;EDM1;EIF2AK3;EPHA1;EPHA2;FGF2;FGFR1;FOXJ1;GABARAPL2;GOSR2;GPR55;HSP90B1;HTRA2;HYOU1;ITPR3;KDELRL3;LCK;MBTPS1;MSH6;MUL1;MYC;MYO5  
AD;ALX3;APBB1;ARHGAP35;ARID1B;ARNTL2;ASCC1;ASMT;ASPDH;ASXL1;ATF6B;ATIC;ATN1;ATP1A1;ATP1A3;ATP2A2;ATP2A3;ATPSA1;ATPSB;ATPSJ;ATPSJ2;ATP8B1;ATXN1L;AVPR2;AXIN1;BACH2;BAHD1;BATF;BATF3;BAZ1B;BCL10;BCL11B;BCL9L;BEX1;BLM;BMP2;BPTF;BRD2;BRD7;BRPF1;BTRC;C14orf169

DLST;DNAJA3;EARS2;ETFDH;ETHE1;FH;FXN;GARS;GLS2;GLUD1;GOT2;GPT2;GRPEL1;HADH;HADHA;HADHB;HSPA1L;HSPA9;HSPD1;IARS2;IDH3A;IVD;KARS;IARS2;MCCCI1;MCCCI2;MIPEP;MRFL49;MRPS24;MRPS36;MRPS9;NDUFA10;NDUFA9;NFS1;NSUN4;OGDH;PCCA;PCCB;PDHA1;PDHB;PDP;PITRM1;POL



IGAP35;ARHGEF1;ARHGEF16;ARHGEF18;ARHGEF3;ARHGEF4;ARHGEF5;ARHGEF6;ARHGEF7;ARHGEF9;AXIN1;AXIN2;CDC42BPA;CDC42BPB;CDC42BPG;CIT;CYTH1;CYTH3;DENND2D;DENND4B;DNAJA3;DOCK10;DOCK7;DOCK9;EIF2B1;EVI5L;FGD1;GBF1;HERC1;HERC2;HMHA1;IPO5;KALRN;LAMTOR1;MADD;APOBEC3F;ARHGAP35;ARID1B;ARNTL2;ASCC1;ASXL1;ATN1;ATP8B1;ATXN1L;AVPR2;AXIN1;AXIN2;BAHD1;BAZ1B;BBS2;BCL10;BCL11B;BCL2;BCL9L;BEX1;BLM;BMP2;BPTF;BRD2;BRD7;BRPF1;BTRC;C14orf169;C1D;CALR;CAMTA2;CAND2;CAPN3;CARD11;CBFA2T2;CBX2;CBX5;CBX7;CCAR1;CCDC88C;CCNT1;C

3;ADCY6;ADCY7;ADCY9;ADD1;AGAP5;AGAP6;AHS1A1;AIFM1;AKAP17A;AKNA;AKT2;ANAPC1;ANAPC5;ANAPC7;ANK3;ANKLE2;APBA1;APBA2;APBB1;APOBEC3F;ARHGAP15;ARHGAP29;ARHGAP35;ARHGF16;ARHGEF5;ARHGEF6;ARHGEF7;ARID1B;ARNTL2;ASB1;ASCC1;ASXL1;ATG10;ATG14;ATN1;ATP6V1H;A1;ARHGAP15;ARHGAP29;ARHGAP35;ARHGF16;ARHGEF5;ARHGEF6;ARHGEF7;ARID1B;ARNTL2;ASCC1;ASXL1;ATN1;ATP8B1;ATXN1L;AVPR2;AXIN1;AXIN2;BAHD1;BAZ1B;BCL10;BCL11B;BCL9L;BEX1;BLM;BMP2;BPTF;BRD2;BRD7;BRPF1;BTRC;C14orf169;C1D;CALM3;CALR;CAMTA2;CAND2;CAPN3;CARD11;CBFXW2;GART;GMPH5;HECTD1;HERC1;HERC2;HLCS;HUWE1;IRAK1;KCTD10;KCTD13;LGSN;LMO7;MCCC1;MTHFD1;MTHFD1L;MTHFS;MUL1;PAICS;PCCA;PET112;PFAS;PJA1;PPCS;PPII2;PRPF19;RFWD3;RNF125;RNF20;RNF4;RNF8;SYVN1;TNFAIP1;TRAF3;TRIM17;TRIM56;TRIM68;TTC3;TTL;TLL3;TLL1A1;ALDH6A1;ALDH7A1;AMACR;AMFR;ANAPC1;ANAPC5;ANAPC7;APOBEC3F;ARG1;ARHGAP15;ARHGAP29;ARHGAP35;ARHGF16;ARHGEF5;ARHGEF6;ARHGEF7;ARIH2;ASPDH;ATG10;ATG13;ATG14;ATG3;ATG9B;ATM;ATPS1A;ATPS5;ATPSJ2;ATPSJ2;ATP6V1H;ATP8B1;ATP8B2;AXIN1;AXIN2;BAD;BCLN1;FBF1;HAUS5;INCCNP;INVS;JTB;KIF3B;KIF4A;KNTC1;MAD2L1BP;MAD2L2;MAP4;MAP7D3;MMS19;MYC;NEIL2;NSUN2;NUMA1;NUP62;ODF2;PCF1;PINX1;POLB;PRC1;PRPF19;RAB11FIP3;RACGAP1;RCC2;RPS6KA2;SEPT6;SPEC1L;TADA2A;TBCCD1;TUBGCP4;TUBGCP5;TUBGCP6;YEATS2;ZW1

K4;GOSR2;HSP90AB1;HSP90B1;HSPA1L;HSPA4;HSPA8;HSPD1;HSPH1;HYOU1;KDEL3;MBTPS1;PDIA5;PDIA6;RHBDD1;SHC1;SYVN1;TATDN2;TSPYL2;VCP;XBP1;MLXIP;MTOR;MUL1;MYO19;PI4KB;PLD6;RETSAT;SAMM50;SIGMAR1;SLC24A1;SMCR7L;SOX10;SYNE1;SYNE2;TMEM109;TOMM34;VAMP1;VAT1;VDAC1;VDAC3;CRT3;CTCF;DDIT3;DDX17;ECD;FGF2;GATA3;GMEB2;GTF2A2;HCF1;HDAC1;HMGA1;HSBP1;HTATIP2;ICMT;IL13RA;JAZF1;KCTD1;KDM1A;L3MBTL2;LDB1;LPIN1;LPXN;MAGED1;MBD1;MECP2;MED11;MED24;MED27;MED30;MED31;MED6;MEIS2;MKL1;MMS19;MNT;MYCBP;NAB2;NCOR2;NFE2L1;NMI;NR1;SATB1;SCAF8;SFPO;SNW1;SRRM1;TEP1;THOC1;TP53;UHRF1AF7;DCAF8;DDB1;DTL;FBXW8;FZR1;KCTD10;KCTD13;KHLH3;MAD2L2;TNFAIP1

UP188;NUP205;NUP210;NUP214;NUP62;NUP93;NXF1;POM121;POM121C;RNPS1;SEH1;SMG6;SRRM1;SRF5;THOC1;THOC2;UZAF1;ASE1;DST;DTL;EIF5A;EMD;FAF1;FZR1;GLE1;GTPBP4;GUCY2D;HTATIP2;INTS1;IPO5;IPO9;ITPR3;LPIN1;MNS1;MYO1C;NUP133;NUP155;NUP188;NUP205;NUP210;NUP214;NUP62;NUP93;NXF1;PARP1;PCM1;POLA1;POM121;POM121C;POU6F1;RETSAT;RNF43;S100A6;SCRN1;SEH1;SIGMAR1;SMAD3;SUN2;X3;APBB1;ARHGAP35;ARID1B;ARNTL2;ASCC1;ASPDH;ASXL1;ATF6B;ATC;ATN1;ATP1A1;ATP1A3;ATP2A2;ATP2A3;ATPSA1;ATPSB;ATPSJ;ATPSJ2;ATP8B1;ATXN1L;AVPR2;AXIN1;BACH2;BAHD1;BATF;BATF3;BAZ1B;BCL10;BCL11B;BCL9L;BEX1;BLM;BMP2;BPTF;BRD2;BRD7;BRPF1;BTRC;C14orf169;C1D;CAD;CAF7;ARHGEF9;BAD;CALM3;CASP2;DDIT4;DUSP7;FGD1;HDAC1;IKBK;IRAK1;IRS1;ITPR3;KALRN;MAGED1;MAPK7;MAPKAP1;MCF2L;MTOR;NET1;OBSCN;OMG;PCKS5;PDK1;PIK3R2;PLCG1;PLEKHG2;PRDM4;PRKCA;PSENNEN;RALGDS;RAPGEF1;RASGRF2;RELA;RPS6KA2;SHC1;THEM4;TIAM1;TRIO;VAV2;YWHA10;DOCK9;FGD1;KALRN;MCF2L;NET1;OBSCN;PLEKHG2;RASGRF2;TIAM1;TRIO;VAV7

1;POLA1;PSPC1;RUVBL1;SATB1;SCAF8;SFPO;SNW1;SRRM1;TEP1;THOC1;TP53;UHRF1

K4;F12;GOSR2;HSP90AB1;HSP90B1;HSPA1L;HSPA4;HSPA8;HSPD1;HSPH1;HYOU1;KDEL3;MBTPS1;PDIA5;PDIA6;RHBDD1;SHC1;SYVN1;TATDN2;TSPYL2;VCP;XBP1;KDEL3;MBTPS1;PDIA5;PDIA6;SHC1;SYVN1;TATDN2;TSPYL2;VCP;XBP1;5B;CDK5RAP2;CDKN2A;CDKN2B;CHEK2;DNAJA3;DPYSL2;ELAVL1;EPHA1;FAF1;FLNA;FOXM1;GYS1;HNRNPA0;HSP90AB1;IKBK;IL12RB2;IL13RA;IRS1;JTB;KIF13B;LAX1;LCK;MAD2L2;MAP2K6;MAP2K7;MAP3K12;MAPK7;MAPK8IP3;MAPK9;MAPT;MAVS;NEK9;PAM;PARD6A;PARN;PDPK1;PKD1;PPME1;PRC1;BFA2T2;CBX2;CBX5;CBX7;CDAN1;CDKN2A;CHCHD3;CITA;CRY2;CTCF;CTRN9;DDIT3;DDX20;DNAJA3;DNMT1;DNMT3A;DRD4;EHMT1;EZH1;FGF2;FGFR1;FOSB;FOXJ1;FOXK1;FOXM1;FOXP1;GABBR1;GATA3;GRM2;GTPBP4;HCF1;HDAC1;HEXIM1;HHEX;HIC2;HIF1AN;HMG20A;HMGA1;HNRNPA2B1;HSBP1;HSP3C4;HCF1;HDAC1;HLCS;HUWE1;JNG5;KAT6B;KDM1A;KDM2B;KDM4A;KDM4C;KDM5C;LDB1;LEF1;LEO1;LPIN1;MAP3K12;MECP2;MLL;MLL4;PAXIP1;PCGF1;PHF15;PIM3;POLE3;PRKCA;PRMT2;PYGO2;RBM14;RNF20;RNF8;RUVBL1;SATB1;SETD1A;SNW1;SRCAP;TADA2A;TAF1;TAF10;TCF3;TP53;TRIM16;TRR;GEEF4;ARHGEF5;ARHGEF6;ARHGEF7;ARPC2;ARPC3;ATG13;ATG14;ATG3;ATG9B;ATXN2L;AXIN1;BAD;BAHD1;BAIAP2L1;BBS1;BBS2;BCL10;BCL2;BICD1;BID;BIK;BLM;BMS1;BRD2;C1D;C2CD3;CADM1;CADM2;CALR;CAPN3;CCDC88C;CCR7;CD3E;CD74;CDAN1;CDH13;CDH24;CDKN2A;CELF1;CENPN;CENPO;CEPATA3;GTF3C4;HCF1;HDAC1;HLCS;HUWE1;JNG5;KAT6B;KDM1A;KDM2B;KDM4A;KDM4C;KDM5C;LDB1;LEF1;LEO1;LPIN1;MAP3K12;MECP2;MLL;MLL4;PAXIP1;PCGF1;PHF15;PIM3;POLE3;PRKCA;PRMT2;PYGO2;RBM14;RNF20;RNF8;RUVBL1;SATB1;SETD1A;SNW1;SRCAP;TADA2A;TAF1;TAF10;TCF3;TP53;TRIF82;CALR;CAPN3;CASP2;CCND1;CCND2;CCNDBP1;CCNF;CCNT1;CDC16;CDC25B;CDK5RAP2;CDKN2A;CDKN2B;CHEK2;CRADD;CSNK2A2;CTCF;CUL1;CUL4A;DDB1;DDIT3;DHCRA2;DST;DTL;EIF4G2;ERCC3;ETS1;FGF2;FGFR1;FHL1;FOXK1;FOXM1;FZR1;GADD45A;GATA3;GTPBP4;HCF1;HDAC1;HEXIM1;HSPA8;HJCY7;ADCY9;ADD1;AGAP5;AGAP6;AHS1A1;AKAP17A;AKNA;AKT2;ANAPC1;ANAPC5;ANAPC7;APOBEC3F;ARG1;ARHGAP15;ARHGAP29;ARHGAP35;ARHGF16;ARHGEF5;ARHGEF6;ARHGEF7;ARID1B;ARNTL2;ASB1;ASCC1;ASXL1;ATN1;ATP8B1;ATXN1L;AVPR2;AXIN1;AXIN2;BAD;BAHD1;BAZ1B;BCL10;BCL11B;BCL9L;BEX1;BLM;BMP2;BPTF;BRD2;BRD7;BRPF1;BTRC;C14orf169;C1D;CALR;CAMTA2;CAND2;CAPN3;CARD11;CBFA2T2;CBX2;CBX5;CBX7;CCAR1;CCNT1;CCR7;CDAN1;CDH13;CDK5RAP2;CDKN2A;CDKN2B;CDON;CELSF1;MTOR;MUL1;MYO19;PI4KB;PLD6;RETSAT;SAMM50;SIGMAR1;SMCR7L;SOX10;SYNE1;SYNE2;TMEM109;TOMM34;VAMP1;VAT1;VDAC1;VDAC3;J1;KDEL3;MBTPS1;PDIA5;PDIA6;RHBDD1;SHC1;SYVN1;TATDN2;TSPYL2;VCP;XBP1;EF9;CYTH1;CYTH3;DENND2D;DENND4B;DOCK10;DOCK7;DOCK9;EIF2B1;FGD1;GBF1;HERC1;HERC2;KALRN;LAMTOR1;MADD;MCF2L;NET1;OBSCN;PLEKHG2;PSD4;RAB1F;RALGDS;RALGPS1;RANBP10;RAPGEF1;RASGRF2;RASGRP2;SBF1;TIAM1;TRIO;VAV0;INPLP1;KCTD13;KITLG;KRT7;LIG1;LIG3;MCM2;MCM3;MCM3AP;MCM4;MCM6;NASP;NF2;PADP7;PDGFC;PINX1;POLA1;POLA2;POLB;POLE;POLE3;POLG;POLH;RBBP4;RBBP7;RBM14;RFC1;RNASEH1;RPA1;RPA2;RRM1;SHC1;SMC1A;SSRP1;SUPT16H;TERF2;TERF2IP;TNFAIP1;TNKS1BP1;TOP2B;TP53;TSPYL2;ARNTL2;ASCC1;ASXL1;ATN1;ATP8B1;ATXN1L;AXIN1;BAHD1;BAZ1B;BCL10;BCL11B;BCL2;BCL9L;BEX1;BLM;BMP2;BPTF;BRD2;BRD7;BRPF1;BTRC;C14orf169;C1D;CALR;CAMTA2;CAND2;CAPN3;CARD11;CBFA2T2;CBX2;CBX5;CBX7;CCAR1;CCNT1;CCR7;CDAN1;CDH13;CDK5RAP2;CDKN2A;CDKN2B;CDON;CELSF2;PAPD7;POLA1;RNF8;RPA1;RPA2;SLX4;TDP1;TERF2IP;TP53;TP53BP1;VCP;XRCC5;XRCC6;ZYFYE2

2;CINP;CRADD;CSNK1E;CUL4A;DCLRE1C;DDB1;DDIT3;DDIT4;DTL;EME2;ERCC3;ERCC5;FAN1;FANCI;FEN1;FOXM1;FZR1;GADD45A;HERC2;HMGA1;HUWE1;IKBKE;ING2;INO80;INTS7;KDM1A;LIG1;LIG3;LOC100133315;MAD2L2;MAP2K6;MDC1;MLH1;MMS19;MRPS9;MSH6;MYC;NEIL2;NFATC2;NFKB;NONO;J.DH1B1;ALDH5A1;ALDH6A1;ALDH7A1;AMACR;AMFR;ANAPC1;ANAPC5;ANAPC7;APOBEC3F;ARG1;ARHGAP15;ARHGAP29;ARHGAP35;ARHGF16;ARHGEF5;ARHGEF6;ARHGEF7;ARIH2;ASPDH;ATM;ATPSA1;ATPSB;ATPSJ;ATPSJ2;ATP6V1H;ATP8B1;ATP8B2;AXIN1;AXIN2;BAD;BLM;BTRC;CAD;CALM3;CARNS1;VK1;MAP4;NDC80;NUMA1;PTK2;SCRIB;ZW1C;ARNTL2;ASB1;ASCC1;ASXL1;ATN1;ATP8B1;ATXN1L;AXIN1;BAHD1;BAZ1B;BCL10;BCL11B;BCL2;BCL9L;BEX1;BLM;BMP2;BPTF;BRD2;BRD7;BRPF1;BTRC;C14orf169;C1D;CALR;CAMTA2;CAND2;CAPN3;CARD11;CBFA2T2;CBX2;CBX5;CBX7;CCAR1;CCNT1;CCR7;CD3E;CD4;CDAN1;CDH13;CDK5RAP2;CDKN2A;CDK

FS;DCAF7;DCAF8;DDB1;DTL;FBXL12;FBXO21;FBXW8;FZR1;KCTD10;KCTD13;KHLH3;LMO7;MAD2L2;PPII2;PRPF19;RNF20;RNF8;TCEB1;TNFAIP1;UBE2B;UBE2L1;GGH;GLS2;GLUD1;GMP5;GOT1;GOT2;GPT;GPT2;HPD;HTT;IBA57;IVD;KYNUL;LGSN;MCCC1;MCCC2;MECP2;MTHFD1;MTHFR;NFS1;OGDH;PCBD1;PDP1;PFAS;PSAT1;SEPHS2;SHMT1;SMBFA2T2;CBX2;CBX5;CBX7;CDAN1;CDKN2A;CHCHD3;CITA;CRY2;CTCF;CTRN9;DDIT3;DDX20;DNAJA3;DNMT1;DNMT3A;DRD4;EHMT1;EZH1;FGF2;FGFR1;FOSB;FOXJ1;FOXK1;FOXM1;FOXP1;GABBR1;GATA3;GRM2;GTPBP4;HCF1;HDAC1;HEXIM1;HHEX;HIC2;HIF1AN;HMG20A;HMGA1;HNRNPA2B1;HSBP1;HSP3C4;HCF1;HDAC1;HLCS;HUWE1;JNG5;KAT6B;KDM1A;KDM2B;KDM4A;KDM4C;KDM5C;LDB1;LEF1;LEO1;LPIN1;MAP3K12;MECP2;MLL;MLL4;PAXIP1;PCGF1;PHF15;PIM3;POLE3;PRKCA;PRMT2;PYGO2;RBM14;RNF20;RNF8;RUVBL1;SATB1;SETD1A;SNW1;SRCAP;TADA2A;TAF1;TAF10;TCF3;TP53;TRIM16;TRR;GEEF4;ARHGEF5;ARHGEF6;ARHGEF7;ARPC2;ARPC3;ATG13;ATG14;ATG3;ATG9B;ATXN2L;AXIN1;BAD;BAHD1;BAIAP2L1;BBS1;BBS2;BCL10;BCL2;BID;BIK;BLM;BMS1;BRD2;C1D;C2C03;CADM1;CADM2;CALR;CAPN3;CCDC88C;CCR7;CD3E;CD74;CDAN1;CDH13;CDH24;CDKN2A;CELF1;CENPN;CENPO;CEPATA3;GTF3C4;HCF1;HDAC1;HLCS;HUWE1;JNG5;KAT6B;KDM1A;KDM2B;KDM4A;KDM4C;KDM5C;LDB1;LEF1;LEO1;LPIN1;MAP3K12;MECP2;MLL;MLL4;PAXIP1;PCGF1;PHF15;PIM3;POLE3;PRKCA;PRMT2;PYGO2;RBM14;RNF20;RNF8;RUVBL1;SATB1;SETD1A;SNW1;SRCAP;TADA2A;TAF1;TAF10;TCF3;TP53;TRIF82;CALR;CAPN3;CASP2;CCND1;CCND2;CCNDBP1;CCNF;CCNT1;CDC16;CDC25B;CDK5RAP2;CDKN2A;CDKN2B;CHEK2;CRADD;CSNK2A2;CTCF;CUL1;CUL4A;DDB1;DDIT3;DHCRA2;DST;DTL;EIF4G2;ERCC3;ETS1;FGF2;FGFR1;FHL1;FOXK1;FOXM1;FZR1;GADD45A;GATA3;GTPBP4;HCF1;HDAC1;HEXIM1;HSPA8;HJCY7;ADCY9;ADD1;AGAP5;AGAP6;AHS1A1;AKAP17A;AKNA;AKT2;ANAPC1;ANAPC5;ANAPC7;APOBEC3F;ARG1;ARHGAP15;ARHGAP29;ARHGAP35;ARHGF16;ARHGEF5;ARHGEF6;ARHGEF7;ARID1B;ARNTL2;ASB1;ASCC1;ASXL1;ATN1;ATP8B1;ATXN1L;AVPR2;AXIN1;AXIN2;BAD;BAHD1;BAZ1B;BCL10;BCL11B;BCL9L;BEX1;BLM;BMP2;BPTF;BRD2;BRD7;BRPF1;BTRC;C14orf169;C1D;CALR;CAMTA2;CAND2;CAPN3;CARD11;CBFA2T2;CBX2;CBX5;CBX7;CCAR1;CCNT1;CCR7;CDAN1;CDH13;CDK5RAP2;CDKN2A;CDKN2B;CDON;CELSF2;PAPD7;POLA1;RNF8;RPA1;RPA2;SLX4;TDP1;TERF2IP;TP53;TP53BP1;VCP;XRCC5;XRCC6;ZYFYE2

CNDP2;CPS2;DARS2;DLD;DLST;DNMT3A;DUOX1;EARS2;EIF5A;ENOSF1;EPRS;ETHE1;FARSB;FASN;GARS;GATA3;GGH;GGT7;GGA1P;GLS2;GLUD1;GMP5;GOT1;GOT2;GPT;GPT2;GSTM4;HARS;HPD;HTT;IARS;IARS2;IBA57;IVD;KARS;KYNUL;LARS;LARS2;LGSN;MARS;MCCC1;MCCC2;MECP2;MGST1;MTHFD1;MT3PBD1B;TAF1;TAF10;TAF3;TAF6;TAF8;TBP;TP53;TRRA1

1;ARHGEF18;ARHGEF3;ARHGEF4;ARHGEF6;ARHGEF7;ARHGEF9;ATG3;ATM;ATN1;AXIN1;BAD;BAG3;BCL10;BCL11B;BCL2;BID;BIK;BIRC6;BLCAP;BMP2;BRSK2;C11orf82;C1D;C22orf29;CADM1;CALR;CAPN3;CARD11;CARD14;CARD16;CASP1;CASP10;CASP2;CCAR1;CCR7;CD3E;CD40LG;CD74;CDKN2A;CHEK2;CLH;ETHE1;GLUD1;GOT1;GOT2;GPT;GPT2;HACL1;HADH;HADHA;HADHB;HPD;IBA57;IRS1;IVD;KYNUL;LONP2;LPIN1;MCCC1;MCCC2;MTOR;OGDH;PCBD1;PCCA;PCCB;PCYOX1;PCYOX1L;PDP1;PEX5;PPARA;PPARD;SHMT;H;ETHE1;GLUD1;GOT1;GOT2;GPT;GPT2;HACL1;HADH;HADHA;HADHB;HPD;IBA57;IRS1;IVD;KYNUL;LONP2;LPIN1;MCCC1;MCCC2;MTOR;OGDH;PCBD1;PCCA;PCCB;PCYOX1;PCYOX1L;PDP1;PEX5;PPARA;PPARD;SHMT;USP7

NUP133;NUP155;NUP214;NXF1;PKD1;RNPS1;SMG6;SRRM1;SRF5;TCF7L2;THOC1;THOC2;TSC1;TXN;UZAF3;XPO1;T1;EIF4G1;ERCC3;FYN;GTF2A2;HCF1;HMGA1;HSPA8;HSPD1;HTATIP2;HYAL2;IL16;IL2RB;IL2RG;IPAS;KARS;KCTD5;KDM4A;KLC1;KRT7;LCK;MAVS;MFG8;MMP1;NXF1;NMT2;NXF1;PAAF1;PLCG1;POLA1;RBM15B;RELA;RNF216;RRAGA;SATB1;SCRIB;SEPT6;SF3B2;SLAMF1;SLC20A2;SMAD3;SNAPIN;SNBFA2T2;CBX2;CBX5;CBX7;CDAN1;CDKN2A;CHCHD3;CITA;CIRBP;CRY2;CTCF;CTRN9;DDIT3;DDX20;DNAJA3;DNMT1;DNMT3A;EHMT1;EIF2AK3;EIF2AK4;EIF2B1;EIF4A3;EPRS;EZH1;FGF2;FGFR1;FOSB;FOXJ1;FOXK1;FOXM1;FOXP1;GATA3;GTPBP4;HCF1;HDAC1;HEXIM1;HHEX;HIC2;HIF1AN;HMG20A;HMGA1;H2;NUP93;NXF1;POM121;POM121C;SEH1;LNPO2;XPO5;ARHGEF4;ARHGEF5;ARHGEF6;ARHGEF7;ARHGEF9;CCR7;CYTH1;CYTH3;DOCK7;EPHA1;EPHA2;FGD1;FOXJ1;FOXM1;GBF1;GPR55;ICMT;ITPKB;KALRN;KANK1;KCTD13;KITLG;MCF2L;MTOR;MYO9B;NCKAP1L;NET1;NRG1;NUP62;OBSCN;OCLR;PLEKHG2;PSD4;PTK2;RAB3GAP1;RAS43;RASA4;RASAL3;RASGRF2;SI

TSC1;UBE2B;USP13;VHL;ZBED3

.7;DDB1;DYNCL12;DYNLT1;EIF4G1;ERCC3;FYN;GTF2A2;HCFC1;HDAC1;HMGA1;HSPA8;HSPD1;HTATIP2;HTATS1;HYAL2;IL16;IL2RB;IL2RG;IPOS;KARS;KCTD5;KDM4A;KLC1;KRT7;LCK;LEF1;MAVS;MFGE8;MMP1;NFX1;NMT1;NMT2;NUP133;NUP155;NUP188;NUP205;NUP210;NUP214;NUP62;NUP93;NXF1;PA  
;MARS;NARS;NSUN2;PET112;POP1;PUS3;QYND;RTP11;RPP14;RPP21;SARS;TARS;TRIT1;TYW1;WTA4;YAR  
R1;LAS1;NOL9;NOLC1;NOP10;NOP14;NSUN4;PA2GA;PDCD11;RRP1B;TSR2;UTP14A;UTP20;WBP11;WDR5  
;CDKSRAP2;CEP104;CEP164;CEP72;CEP85;CEP89;CHD3;CHD4;CKAP5;CNTRL;CROCC;DCTN1;DCTN5;DDHD2;DHX9;DIS13;DTL;DYNCL11;DYNCL12;DYNCL12;EXOC7;FBF1;HAUSS;HERC2;JTB;KDM4A;KIAA0368;KIAA0586;KIAA0753;KIF3B;LCK;MAP7D3;MCM3;MID2;MYCBP;NEURL4;NPHP4;ODF2;PCM:  
39;ARHGFE1;ARHGFE16;ARHGFE18;ARHGFE3;ARHGFE4;ARHGFE5;ARHGFE6;ARHGFE7;ARHGFE8;ARHGFE9;CCR7;CDON;CYTH1;CYTH3;DOCK7;EPHA1;EPHA2;FGD1;FOXJ1;FOXN1;GBF1;GPR55;HMHA1;ICMT;INPP5B;ITPKB;KALRN;KANK1;KCTD13;KITLG;MCF2L;MTOR;MYO9B;NCKAP11;NET1;NUP62;OBSCN;OC  
RHGEF6;ARHGFE7;ARHGFE9;CCR7;CDH13;DOCK7;EPHA1;EPHA2;FGD1;FOXJ1;GPR55;KALRN;KANK1;KCTD13;MCF2L;MTOR;MYO9B;NCKAP11;NET1;OBSCN;OCLR;PHACTR4;PLEKHG2;PTK2;RASGRF2;SCRIB;SRGAP1;SYDE1;TAX1BP3;TBC1D7;TIAM1;TNFAIP1;TRIO;TSC1;VANGL2;VAV  
NUP62;NUP93;NXF1;POM121;POM122;SEH1L;TNPO2;VDAC1;VDAC2;XPO1  
.7;DDB1;DYNCL12;DYNLT1;EIF4G1;ERCC3;FYN;GTF2A2;HCFC1;HDAC1;HMGA1;HSPA8;HSPD1;HTATIP2;HTATS1;HYAL2;IL16;IL2RB;IL2RG;IPOS;KARS;KCTD5;KDM4A;KLC1;KRT7;LCK;LEF1;MAVS;MFGE8;MMP1;NFX1;NMT1;NMT2;NUP133;NUP155;NUP188;NUP205;NUP210;NUP214;NUP62;NUP93;NXF1;PA  
BB1;ARHGFE16;ARHGFE18;ARHGFE3;ARHGFE4;ARHGFE5;ARHGFE6;ARHGFE7;ARHGFE9;ATG3;ATM;ATN1;AXIN1;AXIN2;BAD;BAG3;BCL10;BCL11B;BCL2;BID;BIK;BIRC6;BLCAP;BMP2;BRSK2;C11orf82;C1D;C22orf29;CADM1;CALR;CAPN3;CARD11;CARD14;CARD16;CASP1;CASP10;CASP2;CCAR1;CCR7;CD3E;CD40LG;CD  
K1E;CUL1;CUL4A;CUL7;CUL9;DDI1;DDIT3;DERL2;DTL;DYX1C1;EDEM1;FAF1;FBX12;FBXO21;FLNA;FOXRED2;FYN;FZR1;GABARAPL2;GRIN2C;HECTD1;HERC2;HSP90A11;HSP90B1;HTRA2;HUWE1;IL10;KCTD10;KCTD13;KIAA0368;LNPEP;LONP2;MAD2L2;MDM4;MTOR;NEDD8;NKD1;NRG1;PAN2;PCYOX1;PJA:  
A1;ALG8;ALG9;ASMT;ATAT1;ATIC;ATM;B3GALT4;B3GNTL1;BAZ1B;BRSK2;C1GALT1C1;C9orf96;CAD;CARD11;CCL8;CCND1;CD3EAP;CD42BPA;CD42BPG;CDKAL1;CERK;CHEK2;CHST12;CIT;CKM;CLK2;COX10;CSNK1E;CSNK2A2;CSR2BP;DAD1;DCLK2;DCTN5;DDR1;DFFB;DGKA;DGKD;DGKH;DGKQ  
BB1;ARHGFE16;ARHGFE18;ARHGFE3;ARHGFE4;ARHGFE5;ARHGFE6;ARHGFE7;ARHGFE9;ATG3;ATM;ATN1;AXIN1;AXIN2;BAD;BAG3;BCL10;BCL11B;BCL2;BID;BIK;BIRC6;BLCAP;BMP2;BRSK2;C11orf82;C1D;C22orf29;CADM1;CALR;CAPN3;CARD11;CARD14;CARD16;CASP1;CASP10;CASP2;CCAR1;CCR7;CD3E;CD40LG;CD  
I;C1D;CALR;CAPN3;CBFA2T2;CBX2;CBX5;CBX7;CDAN1;CDKN2A;CHCHD3;CIITA;CIRBP;CRY2;CTCF;CTR9;DDIT3;DDX20;DNAJA3;DNMT1;DNMT3A;EHMT1;EIF2AK3;EIF2AK4;EIF2B1;EIF4A3;EPRS;EZH1;FGF2;FGFR1;FOSB;FOXJ1;FOXK1;FOXM1;FOXP1;GATA3;GTPBP4;HCFC1;HDAC1;HEXIM1;HHEX;HIC2;HIF1AN;  
I;ASXL1;ATF6B;ATN1;ATP8B1;ATXN1L;AXIN1;BACH2;BAHD1;BATF;BATF3;BAZ1B;BCL10;BCL11B;BCL9L;BEX1;BLM;BMP2;BPTF;BRD2;BRD7;BRPF1;BTRC;C14orf169;C1D;CALR;CAMTA2;CAND2;CAPN3;CARD11;CBFA2T2;CBX2;CBX5;CBX7;CCAR1;CCNT1;CD3EAP;CDH13;CDKSRAP2;CDKN2A;CDKN2B;CDON;CEI  
C1;SYVN1;TATDN2;TSPYL2;XBP1  
L4;MPHOSPH8;MTA2;MTR;NSUN2;PAXIP1;PLD6;PRMT2;PYGO2;RNF20;RNMT;SATB1;SETD1A;SETD6;SNW1;TGS1;TPMT;UHRF1;USP7;WDR  
DIT3;DERL2;DTL;EDEM1;EXOSC10;FAF1;FBX12;FBXO21;FOXRED2;FZR1;HECTD1;HERC2;HSP90A11;HSP90B1;HUWE1;KCTD10;KCTD13;KIAA0368;MAD2L2;NEDD8;PAN2;PCYOX1;PPP2R5C;PSMC4;PSMD1;PSMD11;PSMD2;PSMD6;PSMD7;PSME4;PTK2;RHBDD1;RNF20;RNF216;RNF4;RNF43;RNF8;SEC61B;S  
D11;CCL8;CCND1;CD3EAP;CD42BPA;CD42BPB;CD42BPG;CERK;CHEK2;CIT;CKM;CLK2;CSNK1E;CSNK2A2;DCLK2;DDR1;DGKA;DGKD;DGKH;DGKQ;DKC1;DLG3;DSTYK;EEF2K;EFNA4;EIF2AK3;EIF2AK4;EPHA1;EPHA2;ERBB3;ERCC3;FAM20B;FASTKD5;FGFR1;FGFR1L;FGGY;FLT4;FNK3RP;FYN;GALK2;GALT;GKS;  
;ANXA2;ARHGAP15;ARHGAP29;ARHGAP35;ARHGFE16;ARHGFE5;ARHGFE6;ARHGFE7;AVPR2;AXIN1;AXIN2;BAD;BCL10;BCL2;BEX1;BMP2;BTRC;CALM3;CALR;CAPN3;CARD11;CARD14;CASP1;CCND1;CCND2;CCR7;CD4;CD74;CDC16;CDC25B;CDKN2A;CRTCL;CRTCS;CUL1;CUL7;CXCL1;CYTL1;DCTN1;DDIT3;DNA  
TDP1;WBP11;XPC  
NTR1;CSNK1E;DCTN1;DYNCL11;DYNCL12;FHL1;FOXM1;KHDRBS1;MTA3;NINL;NUMA1;ODF2;PCM1;PCNT;SFI1;TAF1;TOP2B;TUBB;TUBGCP4;TUBGCP5;TUBGCP6;YWHAE  
P5J2;BAD;BCL2;BDH1;BID;BIK;BRI3BP;CHCHD3;COX10;COX15;COX5B;COX8A;CYB5B;DHODH;DNAJC11;EFHD1;ETFDH;EXOG;GOT2;GRAMD4;HADHA;HADHB;HERC2;HSPD1;HTRA2;IMMT;LETM1;LOC494141;MAVS;MCCC1;MCCC2;MGST1;MLXIP;MTCH2;MTOR;MUL1;MYO19;NAT18;NDUFA10;NDUFA2;NDI  
RCC2;SMARCE1;ZBTB1E  
IL;NET1;OCLR;SCRIB;SYDE1;TAX1BP3;TBC1D7;TSC1  
1;PCM1;PCNT;RAB11FIP3;SFI1;STAROD9;TCP1;TUBGCP4;TUBGCP5;TUBGCP6  
DIT3;DERL2;DTL;EDEM1;FAF1;FBX12;FBXO21;FOXRED2;FZR1;HECTD1;HERC2;HSP90A11;HSP90B1;HUWE1;KCTD10;KCTD13;KIAA0368;MAD2L2;NEDD8;PAN2;PPP2R5C;PSMC4;PSMD1;PSMD11;PSMD2;PSMD6;PSMD7;PSME4;PTK2;RHBDD1;RNF20;RNF216;RNF4;RNF43;RNF8;SEC61B;SYVN1;TAF1;TCEB1;  
1;ATN1;ATP8B1;ATXN1L;AXIN1;BAHD1;BAZ1B;BCL10;BCL11B;BCL9L;BEX1;BLM;BMP2;BPTF;BRD2;BRD7;BRPF1;BTRC;C14orf169;C1D;CALR;CAMTA2;CAND2;CAPN3;CARD11;CBFA2T2;CBX2;CBX5;CBX7;CCAR1;CCNT1;CDH13;CDKSRAP2;CDKN2A;CDKN2B;CDON;CELF1;CELSR2;CHCHD3;CHD2;CHD3;CHD4;C1  
6B;LEF1;MCM3;MPHOSPH8;POLA1;POLA2;POLE;POLES;RPA1;RPA2;TCF3;TCF7L2;TERF2;TERF2IP;XRCC5;XRCC6  
V;AXIN1;AXIN2;BAD;BATF;BAZ1B;BCL2;BLM;BRSK2;C11orf82;CALR;CAPN3;CASP2;CCND1;CCR7;CD74;CDKN2A;CEP164;CHD1;CHEK2;CINP;CLPB;CRADD;CREB3L2;CSNK1E;CUL4A;CUL7;DCLRE1C;DCTN1;DDB1;DDIT3;DDIT4;DERL2;DHX9;DTL;DUOX1;DUSP7;DVL2;EDEM1;EIF2AK3;EIF2AK4;EIF2B1;EME2;ERC  
AP35;ARID1B;ARNTL2;ASB1;ASCC1;ASXL1;ATN1;ATP8B1;ATXN1L;AVPR2;AXIN1;BAHD1;BAZ1B;BCL10;BCL11B;BCL9L;BEX1;BLM;BMP2;BPTF;BRD2;BRD7;BRPF1;BTRC;C14orf169;C1D;CALR;CAMTA2;CAND2;CAPN3;CARD11;CBFA2T2;CBX2;CBX5;CBX7;CCAR1;CCNT1;CCR7;CD3E;CD4;CDAN1;CDH13;CDK  
DIT3;DERL2;DTL;EDEM1;FAF1;FBX12;FBXO21;FOXRED2;FZR1;HECTD1;HERC2;HSP90A11;HSP90B1;HUWE1;KCTD10;KCTD13;KIAA0368;MAD2L2;NEDD8;PAN2;PCYOX1;PPP2R5C;PSMC4;PSMD1;PSMD11;PSMD2;PSMD6;PSMD7;PSME4;PTK2;RHBDD1;RNF20;RNF216;RNF4;RNF43;RNF8;SEC61B;SYVN1;TAF:  
LM;BMP2;BPTF;BRD7;BTRC;C14orf169;C1D;CALR;CAPN3;CBFA2T2;CBX2;CBX5;CBX7;CCDC23;CDAN1;CDC16;CDKN2A;CELF1;CHCHD3;CIITA;CIRBP;CLN8;CRY2;CTCF;CTR9;DDIT3;DDIT4;DDX20;DNAJA3;DNAJC1;DNMT1;DNMT3A;DNMT3B;DNMT3C;EHMT1;EZH1;FGF2;FGFR1;FOSB;FOXJ1;FOXK1;FOXM1;FOXP1;GATA3;HCFC1;HDAC1;HEXIM1;HHEX;HIC2;HIF1AN;HMG20A;HMGA1;HSBP1;HSPA8;ID1;IL4;ILF3;IRF8;JAZF1;KAT6B;KCTD11;KE  
I;NOLC1;NOP10;NOP14;NSUN4;PA2GA;PDCD11;RRP1B;TSR2;UTP14A;UTP20;WBP11;WDR5!  
L1;CUL4A;CUL7;DDB1;DYNCL12;DYNLT1;EIF4G1;ERCC3;FYN;GPX2;GTF2A2;HCFC1;HDAC1;HMGA1;HSPA8;HSPD1;HTATIP2;HYAL2;IL10;IL16;IL2RB;IL2RG;IPOS;IRF8;KARS;KCTD5;KDM4A;KLC1;KRT7;LCK;LEF1;MAVS;MFGE8;MMP1;NFX1;NMT2;NXF1;PAAF1;PLCG1;POLA1;RBM15B;RELA;RNF216;RRAGA;SATB  
L1;CUL4A;CUL7;DDB1;DYNCL12;DYNLT1;EIF4G1;ERCC3;FYN;GPX2;GTF2A2;HCFC1;HDAC1;HMGA1;HSPA8;HSPD1;HTATIP2;HYAL2;IL10;IL16;IL2RB;IL2RG;IPOS;IRF8;KARS;KCTD5;KDM4A;KLC1;KRT7;LCK;LEF1;MAVS;MFGE8;MMP1;NFX1;NMT2;NXF1;PAAF1;PLCG1;POLA1;RBM15B;RELA;RNF216;RRAGA;SATB  
>;DUOX1;ECI2;ETFDH;FASN;FOXRED2;GLUD1;GOT1;GOT2;GPT;GPT2;H6PD;HACL1;HADH;HADHA;HADHB;HIF1AN;IDH3A;IVD;KDM1A;KYNLU;LMO2;MIOX;NDUFA9;NFS1;NNT;OGDH;PARP1;PDXC1;PDXC2CP;PGAM2;PNPO;PSAT1;PYGB;SDHA;SDHB;SHMT1;TP53I3;TXNRD3;TYW1;UXS  
ALR;CAPN3;CBFA2T2;CBX2;CBX5;CBX7;CDAN1;CDKN2A;CHCHD3;CIITA;CIRBP;CLK2;CRY2;CTCF;CTR9;DDIT3;DDX20;DNAJA3;DNMT1;DNMT3A;DRD4;EHMT1;EIF2AK3;EIF2AK4;EIF2B1;EIF4A3;EPRS;EZH1;FAM132A;FGF2;FGFR1;FOSB;FOXJ1;FOXK1;FOXM1;FOXP1;GABBR1;GATA3;GRM2;GTPBP4;HCFC1;HDAC  
I;SLC2A1;SLC46A1;THTPA;TKTL1;VNN3  
C1;SYVN1;TATDN2;TSPYL2;XBP1  
2;CBX2;CBX5;CBX7;CDKN2A;CELF1;CHCHD3;CIITA;CHCHD3;CIITA;CRY2;CTCF;CTR9;DDIT3;DDX20;DNAJA3;DNMT1;DNMT3A;DROSHA;EHMT1;EZH1;FGF2;FGFR1;FOSB;FOXJ1;FOXK1;FOXM1;FOXP1;FYN;GATA3;HCFC1;HDAC1;HEXIM1;HHEX;HIC2;HIF1AN;HMG20A;HMGA1;HSBP1;HSPA8;ID1;IL4;ILF3;INPPL1;IRF8;JAZF1;KA  
AP35;ARID1B;ARNTL2;ASB1;ASCC1;ASXL1;ATN1;ATP8B1;ATXN1L;AVPR2;AXIN1;BAHD1;BAZ1B;BCL10;BCL11B;BCL2;BCL9L;BEX1;BLM;BMP2;BPTF;BRD2;BRD7;BRPF1;BTRC;C14orf169;C1D;CALR;CAMTA2;CAND2;CAPN3;CARD11;CBFA2T2;CBX2;CBX5;CBX7;CCAR1;CCNT1;CCR7;CD3E;CD4;CDAN1;CDH13;CDK  
3BP1;MRPL44;PAN2;PARN;PMS2;POLA1;POLG;POP1;REXO1;RNASE2;RNASE3;RNASE4;RNASEH1;RPP14;RPP21;SLX4;SMG6;SND1;TATDN2;TDP1;ZC3H12B;ZC3H12  
D2D;DENND4B;DOCK10;DOCK9;FGD1;KALRN;MADD;MCF2L;NET1;OBSCN;PLEKHG2;RANBP10;RASGRF2;SFB1;TIAM1;TRIO;VAV  
P5B;ATP5J;ATP5J2;BAD;BCL2;BDH1;BID;BIK;BLOC1S1;BRI3BP;CHCHD3;COX10;COX15;COX5B;COX8A;CYB5B;DHODH;DNAJC11;EFHD1;ETFDH;EXOG;GOT2;GRAMD4;HADHA;HADHB;HERC2;HSPD1;HTRA2;IMMT;LETM1;LOC494141;MAVS;MCCC1;MCCC2;MGST1;MLXIP;MTCH2;MTOR;MUL1;MYO19;NAT18;  
GFES;ARHGFE6;ARHGFE7;ATP1A1;ATP1A3;ATP2A2;ATP2A3;ATP5A1;ATP5B;ATP5J;ATP5J2;ATP6V1H;ATP8B1;ATP8B2;AXIN1;AXIN2;BAD;BLM;CAD;CARNS1;CCR7;CHD1L;CTPS2;DNM1;DOCK7;EFTUD1;EFTUD2;EIF2S3;ENTPD5;EPHA1;EPHA2;FGD1;FOXJ1;GFM1;GNG10;GNL2;GNL3;GTPBP4;HSPD1;IN080;L:  
IAP29;ARHGAP35;ARHGFE6;ARHGFE7;ATC;ATP1A1;ATP1A3;ATP2A2;ATP2A3;ATP5A1;ATP5B;ATP5J;ATP6V1H;ATP8B1;ATP8B2;AXIN1;AXIN2;BAD;BLM;CAD;CARNS1;CCR7;CECR1;CHD1L;CTPS2;DCTD;DERA;HDHDH;DNAJC1;DNM1;DNMT3A;DOCK7;EFTUD1;EFTUD2;EIF2S3;ENT  
5B;CDKSRAP2;CDKN2A;CDKN2B;CHEK2;DGKQ;DNAJA3;DPYSL2;ELAVL1;EPHA1;FAF1;FLNA;FOXM1;GYS1;HNRNP9A;HSP90A11;IKBK1;IL2RB2;IL31RA;IRS1;JTB;KIF13B;LAX1;LCK;MAD2L2;MAP2K6;MAP2K7;MAP3K12;MAPK7;MAPK8IP3;MAPK9;MAPT;MAVS;NEK9;PAM;PARD6A;PARN;POPK1;PIK3IP1;PKD1  
DNAJA3;EARS2;FXN;GFM1;GRPEL1;HGF;HSPA4;HSPA9;HTRA2;HTT;LETM1;LIG3;LPIN1;MAPK9;MIPEP;MUL1;NRF1;PAM16;PET112;PEX5;PLD6;POLG;PPARGC1B;RNASEH1;SAMM50;SMAD3;SMCR7L;SPG7;SUPV3L1;TAMM41;TIMM17B;TOMM34;TP53;VAT  
V3;CARD11;CARD14;CASP2;CCDC88C;CD3E;CIT;CLCN3;CLEC3B;CNTNAP1;CRADD;CSR2BP;CTR9;DLG3;DRD4;DVL2;EPB41L2;EVL;FAF1;FOXJ1;FOXJ3;FOXM1;GATA3;RNASE2;HHEX;HIF1AN;HNRNP;HSP90A11;INPPL1;IRS1;KCTD13;KHDRBS1;L3MBTL1;LAX1;LCK;LDB1;LEF1;MAPT;MAVS;MBD2;MDC1;MECP  
IEF3;ARHGFE4;ARHGFE5;ARHGFE6;ARHGFE7;ARHGFE9;CCR7;CDH13;CDKN2A;CYTH1;CYTH3;DHCR24;DOCK7;EPHA1;EPHA2;FGD1;FGF2;FOXJ1;FOXM1;G3BP1;GBF1;GPR55;GRAP2;ICMT;ITPKB;KALRN;KANK1;KCTD13;KITLG;MCF2L;MTOR;MYO9B;NCKAP11;NET1;NISCH;NRG1;NUP62;OBSCN;OCLR;PHACTR4  
DIT3;DERL2;DTL;DYX1C1;EDEM1;FAF1;FBX12;FBXO21;FOXRED2;FZR1;HECTD1;HERC2;HSP90A11;HSP90B1;HTRA2;HUWE1;KCTD10;KCTD13;KIAA0368;LONP2;MAD2L2;NEDD8;PAN2;PCYOX1;PPP2R5C;PSMC4;PSMD1;PSMD11;PSMD2;PSMD6;PSMD7;PSME4;PTK2;RHBDD1;RNF20;RNF216;RNF4;RNF43;R  
IHGEF5;ARHGFE6;ARHGFE7;ATP5A1;ATP5B;ATP5J;ATP5J2;ATP6V1H;ATP8B1;ATP8B2;AXIN1;AXIN2;BLM;CARNS1;CCR7;CECR1;CHD1L;DNM1;DOCK7;EFTUD1;EFTUD2;EIF2S3;ENTPD4;EPHA1;EPHA2;FGD1;FOXJ1;GFM1;GNG10;GNL2;GNL3;GTPBP4;HSPD1;IN080;LSG1;MACF1;MDN1;MLH1;MSH6;MTOR;M



:7L2;TP53;TP53BP1

RPP14;RPP21;SMGE

:TFDH;FASN;FOXRED2;GLUD1;H6PD;HACL1;HADH;HADHA;HADHB;IDH3A;IVD;KDM1A;MIOX;NDUFA9;NNT;OGDH;PARP1;PNPO;SDHA;TP53I3;TXNRD3;TYW1;UXS1  
ANL3;GGA3;IPO5;KCTD13;KIF16B;KIF3B;MAPKAP1;MYO5B;OCRL;PAR6A;PEX5;PRKCH;RAB11FIP3;RAB3GAP1;RANBP10;SRGAP1;TNFAIP1;ZFYVE2  
RHGEF18;ARHGFEF3;ARHGFEF4;ARHGFEF5;ARHGFEF6;ARHGFEF7;ARHGFEF9;BAD;BDH1;CDC42BPA;CDC42BPB;CDC42BPG;CERK;CIT;CYTH1;CYTH3;DGKA;DGKD;DGKH;DNM1;DOCK10;DOCK9;FGD1;ING2;INPL1;IPCEF1;IRS1;ITPR3;KALRN;KIF16B;LANCL2;LDLRAP1;MCF2L;MFGE8;MPRIIP;MYO1E;NET1;NISCH;OBS  
J1

3;COX15;COX5B;COX8A;DHODH;DNAJC11;EFHD1;ETFDH;EXOG;GOT2;HADHA;HADHB;HERC2;HSPD1;IMMT;LETM1;LOC494141;MCCC1;MCCC2;MGST1;MTCH2;NDUFA10;NDUFA2;NDUFA9;NDUFB4;NDUFB6;NDUFS1;NDUFV3;NNT;PAM16;POLG;SAMM50;SCO1;SCO2;SDHA;SDHB;SFXN1;SFXN2;SLC25A12;

3;PLD6;SAMM50;SMCR7L;SOX10;TOMM34;VAMP1;VAT1;VDAC1;VDAC:  
\*OLR1B;POLR2B;POLR2C;POLR2J;POLR3A;POLR3B;POLR3C;POLR3E;RPAP1;TEP1;ZCCHC1:  
\*7;ZBTB1E

3;COX15;COX5B;COX8A;DHODH;DNAJC11;EFHD1;EMD;ETFDH;EXOG;GOT2;HADHA;HADHB;HERC2;HSPD1;IMMT;LETM1;LOC494141;MCCC1;MCCC2;MGST1;MTCH2;NDUFA10;NDUFA2;NDUFA9;NDUFB4;NDUFB6;NDUFS1;NDUFV3;NNT;PAM16;POLG;SAMM50;SCO1;SCO2;SDHA;SDHB;SFXN1;SFXN2;SIGM  
;DNAJC7;GRPEL1;HSP90AB1;HSP90B1;HSPA8;HSPA9;HSPD1;HTRA2;MDN1;SPG7;ST13;TCP1;TTC1

ATP8B1;ATP8B2;ATP9B;PCYOX1

;NCL;PABPC1;PCGF1;PEX2;PEX5;SAE1;SHANK1;SREBF2;STIP1;TAX1BP3;TERF2;TOP2B;UBE2I;USP7;XRCC5;XRCC6

FM1;PET112;TSFN  
1;KLC2;MYH3;MYH7B;MYO15A;MYO18A;MYO19;MYO1C;MYO1D;MYO1E;MYO5B;MYO9B;SMC1A;STARD

METT12B;METTL7A;METTL7B;MLL;MLL4;MTR;NSUN2;NSUN4;PDP;PRDM2;PRMT2;RNMT;SETD1A;SETD6;SMYD3;TGS1;THUMPD3;TPMT;TRMT2B;WDR4;WHSC  
P1R9B;RPA2;TP53;VCP

A1;ALDH3A2;ALG8;ALG9;AMFR;ANKLE2;AP2B1;AP3D1;AP3S1;APOOL;ARHGAP32;ARL3;ATF6B;ATG9B;ATP10A;ATP2A2;ATP2A3;ATP5A1;ATP5B;ATP5J;ATP5J2;ATP6V0E1;ATP6V1D;ATP6V1F;ATP6V1H;B3GALT4;BACE1;BAD;BBS1;BBS2;BBS9;BCL2;BDH1;BET1L;BIK;BLOC1S1;BRI3BP;C1GALT1C1;CALR;CCF

4UWE1;IRAK1;KCTD10;KCTD13;LMO7;MUL1;PAICS;PIA1;PPCS;PIL2;PRPF19;RFWD3;RNF125;RNF20;RNF4;RNF43;RNF8;SYVN1;TNFAIP1;TRAF3;TRIM17;TRIM56;TRIM68;TTC3;TTL;TTL3;TTL5;UBE2B;UBE2D2;UBE2F;UBE2G2;UBE2I;UBE2L3;UBE2Q1;UBE2Z;UBE3C;UBR4;UBR7;UHRF1;VH

PDIA6;PMEL;SLC1A4;SLC2A1;SND1;YWHAE  
PDIA6;PMEL;SLC1A4;SLC2A1;SND1;YWHAE

HACTR4;PPARA;PPME1;PPP1R16B;PPP1R9B;RPA2;SFI1;SMAD3;TP53;VCP

X2;FAN1;FARSB;FEN1;FOXK1;FOXK2;HACL1;IDH3A;MAP2K7;MAP3K12;MSH6;MTPAP;PI4K2A;PRPS1;RNASEH1;RPS6KA2;SIK1;SIK2;STK36;STK38;TSSK3;TSSK4

CL1;HADHA;HADHB;HMGA1;NEIL2;PAICS;PAM;PCBD1;PDXDC1;PDXDC2P;POLB;SHMT1;UXS1;XRCC5;XRCC6

D;CENPB;CFD;CLASRP;CSNK1G2;CTU1;CWC22;CYLD;DBNDD2;DCAF15;DNAJC4;EGLN2;EID2;EXOSC6;EXOSC9;FAM109A;FBXL14;GAS2L1;GMPPB;GPAA1;GRIN1;H1FX;H2AFX;HES4;HIC1;HMG20B;HSPB1;IDUA;INO80B;IRF2BP1;JUNB;JUND;KISS1R;KLF2;LOXL1;LTB;MAST1;MAT2B;MBD4;METTL21A;MEX3D;M  
;MBD4;MYPOP;NPAS1;NR2F6;OTUD7A;PRDM8;REPIN1;SSBP4;TAF6L;TBX6;TIGD5;USF2;ZDHHC1;ZFPM1;ZNF219;ZNF35;ZNF358;ZNF414;ZNF444;ZNF564;ZNF575;ZNF579;ZNF628;ZNF638;ZNF668;ZNF764;ZNF771;ZNF784;ZNF787;ZNF837;ZNF865;ZSCAN1  
A;PDF;PEX10;PGLYRP2;PRDM8;REPIN1;RNF126;USP33;ZDHHC1;ZDHHC24;ZFPM1;ZNF219;ZNF35;ZNF358;ZNF414;ZNF428;ZNF444;ZNF564;ZNF575;ZNF579;ZNF628;ZNF638;ZNF668;ZNF764;ZNF771;ZNF784;ZNF787;ZNF804A;ZNF837;ZNF865;ZSCAN10;ZSWIM  
;EGLN2;EID2;EXOSC6;EXOSC9;GAS2L1;GRIN1;HES4;HIC1;HMG20B;HSPB1;INO80B;IRF2BP1;JUNB;JUND;KLF2;LTB;MEX3D;MRPL10;MRPL4;MRPL41;MTIF2;MYPOP;NCK2;NPAS1;NR2F6;PABPN1;PCSK1N;PDF;PRDM8;PSMD12;RCE1;RPP25;SKOR1;SNAPC2;SNRPA;SUV420H2;TAF6L;TBX6;UCN;USF2;UTF1;WNT

.SNK1G2;CTU1;CWC22;CYLD;DBNDD2;DCAF15;DNAJC4;EGLN2;EID2;EXOSC6;EXOSC9;FAM109A;FBXL14;GMPPB;GPA1;GRIN1;H1FX;H2AFX;HES4;HIC1;HMG20B;HSPB1;IDUA;INO80B;IRF2BP1;JUNB;JUND;KISS1R;KLF2;LOXL1;MAST1;MAT2B;MBD4;METTL21A;MGAT4B;MRPL10;MRPL4;MRPL41;MTIF2;MYI1;RNF126;USP33;ZDHHHC1;ZDHHHC2;ZFPM1;ZNF219;ZNF35;ZNF358;ZNF414;ZNF428;ZNF444;ZNF564;ZNF575;ZNF579;ZNF628;ZNF638;ZNF668;ZNF764;ZNF771;ZNF784;ZNF787;ZNF804A;ZNF837;ZNF865;ZSCAN10;ZSWIM

3IN1;HES4;HIC1;HMG20B;INO80B;IRF2BP1;JUNB;JUND;KLF2;LTB4R2;MAT2B;MYPOP;NCK2;NPAS1;NR2F6;OAT;PABPN1;PRDM8;SKOR1;SNAPC2;SQLE;SUV420H2;TAF6L;TBX6;UCN;UGP2;USF2;UTF1;WNT6;ZFPM1;ZNF219;ZNF35;ZNF358;ZNF414;ZNF444;ZNF564;ZNF575;ZNF579;ZNF628;ZNF638;ZNF668;ZNF747;ZNF764;ZNF771;ZNF784;ZNF787;ZNF804A;ZNF837;ZNF865;ZSCAN10;ZSWIM

:EID2;EXOSC6;EXOSC9;GRIN1;HES4;HIC1;HMG20B;HSPB1;INO80B;IRF2BP1;JUNB;JUND;KLF2;MYPOP;NCK2;NPAS1;NR2F6;PABPN1;PRDM8;PSMD12;RPP25;SKOR1;SNAPC2;SNRPA;SUV420H2;TAF6L;TBX6;UCN;UGP2;USF2;UTF1;WNT6;ZFPM1;ZNF219;ZNF35;ZNF358;ZNF414;ZNF444;ZNF564;ZNF575;ZNF579;ZNF628;ZNF638;ZNF668;ZNF747;ZNF764;ZNF771;ZNF784;ZNF787;ZNF804A;ZNF837;ZNF865;ZSCAN10;ZSWIM

I;HIC1;HMG20B;INO80B;IRF2BP1;JUNB;JUND;KLF2;LTB4R2;MAT2B;MYPOP;NCK2;NPAS1;NR2F6;OAT;PABPN1;PRDM8;SKOR1;SNAPC2;SUV420H2;TAF6L;TBX6;UCN;UGP2;USF2;UTF1;WNT6;ZFPM1;ZNF219;ZNF35;ZNF358;ZNF414;ZNF444;ZNF564;ZNF575;ZNF579;ZNF628;ZNF638;ZNF668;ZNF747;ZNF764;ZNF771;ZNF784;ZNF787;ZNF804A;ZNF837;ZNF865;ZSCAN10;ZSWIM

IC1;HMG20B;HSPB1;INO80B;IRF2BP1;JUNB;JUND;KLF2;MAT2B;MGAT4B;MRPL10;MRPL4;MRPL41;MTIF2;MYPOP;NCK2;NPAS1;NR2F6;PABPN1;PDF;PRDM8;REPIN1;SKOR1;SNAPC2;SUV420H2;TAF6L;TBX6;UCN;UGP2;USF2;UTF1;WNT6;ZDHHHC1;ZFPM1;ZNF219;ZNF35;ZNF358;ZNF414;ZNF444;ZNF564;ZNF575;ZNF579;ZNF628;ZNF638;ZNF668;ZNF747;ZNF764;ZNF771;ZNF784;ZNF787;ZNF804A;ZNF837;ZNF865;ZSCAN10;ZSWIM

G20B;JUNB;JUND;KLF2;MBD4;MEX3D;MTIF2;MYPOP;NPAS1;NR2F6;OTUD7A;PABPN1;PRDM8;REPIN1;RPP25;SNRPA;SSBP4;TAF6L;TBX6;TIGD5;USF2;ZDHHHC1;ZFPM1;ZNF219;ZNF35;ZNF358;ZNF414;ZNF444;ZNF564;ZNF575;ZNF579;ZNF628;ZNF638;ZNF668;ZNF747;ZNF764;ZNF771;ZNF784;ZNF787;ZNF804A;ZNF837;ZNF865;ZSCAN10;ZSWIM

I;HIC1;HMG20B;INO80B;IRF2BP1;JUNB;JUND;KLF2;LTB4R2;MAT2B;MYPOP;NCK2;NPAS1;NR2F6;PABPN1;PRDM8;SKOR1;SNAPC2;SUV420H2;TAF6L;TBX6;UCN;UGP2;USF2;UTF1;WNT6;ZFPM1;ZNF219;ZNF35;ZNF358;ZNF414;ZNF444;ZNF564;ZNF575;ZNF579;ZNF628;ZNF638;ZNF668;ZNF747;ZNF764;ZNF771;ZNF784;ZNF787;ZNF804A;ZNF837;ZNF865;ZSCAN10;ZSWIM

IC1;HMG20B;HSPB1;INO80B;IRF2BP1;JUNB;JUND;KLF2;LTB;MAT2B;MGAT4B;MRPL10;MRPL4;MRPL41;MTIF2;MYPOP;NCK2;NPAS1;NR2F6;PABPN1;PDF;PRDM8;REPIN1;SKOR1;SNAPC2;SUV420H2;TAF6L;TBX6;UCN;UGP2;USF2;UTF1;WNT6;ZDHHHC1;ZFPM1;ZNF219;ZNF35;ZNF358;ZNF414;ZNF444;ZNF564;ZNF575;ZNF579;ZNF628;ZNF638;ZNF668;ZNF747;ZNF764;ZNF771;ZNF784;ZNF787;ZNF804A;ZNF837;ZNF865;ZSCAN10;ZSWIM

I;HIC1;HMG20B;INO80B;IRF2BP1;JUNB;JUND;KLF2;LTB4R2;LTC45;MAT2B;MYPOP;NCK2;NPAS1;NR2F6;PABPN1;PRDM8;SKOR1;SNAPC2;SUV420H2;TAF6L;TBX6;UCN;UGP2;USF2;UTF1;WNT6;ZFPM1;ZNF219;ZNF35;ZNF358;ZNF414;ZNF444;ZNF564;ZNF575;ZNF579;ZNF628;ZNF638;ZNF668;ZNF747;ZNF764;ZNF771;ZNF784;ZNF787;ZNF804A;ZNF837;ZNF865;ZSCAN10;ZSWIM

PM1;ZNF219;ZNF35;ZNF444;ZNF628;ZSCAN10

PM1;ZNF219;ZNF35;ZNF444;ZNF628;ZSCAN10

7B;CEBPD;CENPB;CFD;CHCHD10;CLASRP;CSNK1G2;CTU1;CWC22;CYLD;CYP51A1;DBNDD2;DCAF15;DNAJC4;EGLN2;EID2;EXOSC6;EXOSC9;FAM109A;FBXL14;GAS2L1;GMPPB;GPA1;GRIN1;H1FX;H2AFX;HES4;HIC1;HMG20B;HSPB1;IDUA;INO80B;IRF2BP1;JUNB;JUND;KISS1R;KLF2;LOXL1;LTB;LTB4R2;LTC45;N

IIC1;HMG20B;HSPB1;INO80B;IRF2BP1;JUNB;JUND;KLF2;MEX3D;MTIF2;MYPOP;NCK2;NR2F6;PRDM8;SKOR1;SUV420H2;TAF6L;TBX6;UCN;USF2;UTF1;WNT6;ZFPM1;ZNF219;ZNF35;ZNF358;ZNF414;ZNF564;ZNF575;ZNF579;ZNF628;ZNF638;ZNF668;ZNF747;ZNF764;ZNF771;ZNF784;ZNF787;ZNF837;ZNF865;ZSCAN10;ZSWIM

I2BP1;JUNB;JUND;KLF2;MYPOP;NCK2;NR2F6;PRDM8;SKOR1;SUV420H2;TAF6L;TBX6;USF2;UTF1;WNT6;ZFPM1;ZNF219;ZNF35;ZNF358;ZNF414;ZNF564;ZNF575;ZNF579;ZNF628;ZNF638;ZNF668;ZNF747;ZNF764;ZNF771;ZNF784;ZNF787;ZNF837;ZNF865;ZSCAN10;ZSWIM

85B;CDK16;CEBPB;CEBPD;CENPB;CFD;CHCHD10;CLASRP;CSNK1G2;CTU1;CWC22;CYLD;CYP51A1;DBNDD2;DCAF15;DNAJC4;EGLN2;EID2;EXOSC6;EXOSC9;FAM109A;FBXL14;GAS2L1;GMPPB;GPA1;GRIN1;H1FX;H2AFX;HES4;HIC1;HMG20B;HSPB1;IDUA;INO80B;IRF2BP1;JUNB;JUND;KISS1R;KLF2;LOXL1;LTB;LTB4R2;LTC45;N

I2BP1;JUNB;JUND;KLF2;MYPOP;NCK2;NR2F6;PRDM8;SKOR1;SUV420H2;TAF6L;TBX6;USF2;UTF1;WNT6;ZFPM1;ZNF219;ZNF35;ZNF358;ZNF414;ZNF564;ZNF575;ZNF579;ZNF628;ZNF638;ZNF668;ZNF747;ZNF764;ZNF771;ZNF784;ZNF787;ZNF837;ZNF865;ZSCAN10;ZSWIM

AS2L1;GRIN1;H2AFX;HES4;HIC1;HMG20B;HSPB1;INO80B;IRF2BP1;JUNB;JUND;KISS1R;KLF2;LTB;MEX3D;MTIF2;MYPOP;NCK2;NR2F6;PRDM8;PSMD12;SKOR1;SOCS1;STK11;SUV420H2;TAF6L;TBX6;UCN;USF2;UTF1;VAPB;WNT6;YIF1A;ZFPM1;ZNF219;ZNF35;ZNF358;ZNF414;ZNF564;ZNF575;ZNF579;ZNF628;ZNF638;ZNF668;ZNF747;ZNF764;ZNF771;ZNF784;ZNF787;ZNF837;ZNF865;ZSCAN10;ZSWIM

O80B;IRF2BP1;JUNB;JUND;KLF2;MTIF2;MYPOP;NCK2;NR2F6;PRDM8;SKOR1;SUV420H2;TAF6L;TBX6;UCN;USF2;UTF1;WNT6;ZFPM1;ZNF219;ZNF35;ZNF358;ZNF414;ZNF564;ZNF575;ZNF579;ZNF638;ZNF668;ZNF747;ZNF764;ZNF771;ZNF784;ZNF787;ZNF837;ZNF865;ZSCAN1  
GMPPB;GPAA1;GRIN1;HES4;HIC1;HMG20B;HSPB1;INO80B;IRF2BP1;JUNB;JUND;KLF2;LTB;LTB4R2;LTC45;MAT2B;MGAT4B;MRPL10;MRPL4;MRPL41;MTIF2;MYPOP;NCK2;NPAS1;NR2F6;OAT;PABPN1;PDF;PHOSPHO1;PRDM8;REPIN1;SKOR1;SNAPC2;SQLE;STK11;SUV420H2;TAF6L;TBX6;UCN;UGP2;USF2;UT

O80B;IRF2BP1;JUNB;JUND;KLF2;LTB;MTIF2;MYPOP;NCK2;NR2F6;PRDM8;SKOR1;SUV420H2;TAF6L;TBX6;UCN;USF2;UTF1;WNT6;ZFPM1;ZNF219;ZNF35;ZNF358;ZNF414;ZNF564;ZNF575;ZNF579;ZNF638;ZNF668;ZNF747;ZNF764;ZNF771;ZNF784;ZNF787;ZNF837;ZNF865;ZSCAN1

O80B;IRF2BP1;JUNB;JUND;KLF2;LTB;LTB4R2;MTIF2;MYPOP;NCK2;NR2F6;PRDM8;SKOR1;STK11;SUV420H2;TAF6L;TBX6;UCN;USF2;UTF1;WNT6;ZFPM1;ZNF219;ZNF35;ZNF358;ZNF414;ZNF564;ZNF575;ZNF579;ZNF638;ZNF668;ZNF747;ZNF764;ZNF771;ZNF784;ZNF787;ZNF837;ZNF865;ZSCAN1



B7;NDUF88;NDUF89;NDUF56;NDUF57;NDUF58;NDUFV1;NF1;NOG;NPRL2;NRP1;OXS1;P2RX7;PDE6G;PDK4;PFKFB2;PICK1;PIK3CB;PIK3CG;PIN1;PIP5K1A;PIP5K1B;PLA2G6;PNKP;POLR2F;POLR2G;POLR2I;POLR2L;PPP1R14A;PPP1R14B;PREB;PRKAR2A;PTPRC;RBPMS;ROCK2;RSRC1;SDHAF2;SENP2;SPRED2;S

VUP153;OGG1;P2RX7;PANX1;PEX16;PEX6;PICK1;PIK3C3;PIP5K1A;PREB;RAB21;RAB25;RAB33A;RABEP2;RABGEF1;RBPMS;RINL;RPL13;RPL18;RPL18A;RPL28;RPL29;RPL38;RPL8;RPLP1;RPLP2;RPS15;RPS2;RPS28;S100A13;SCARB2;SEC22B;SEC24B;SENP2;SERGEF;SLC25A6;SNF8;SNX20;SPTBN4;SSR1;SSR4;STA

LRRC32;MAL;MAMDC4;MAPK1;MED1;MIA3;MTM1;NDUFA13;NECAB3;NF1;NFKB1L1;NIPBL;NSF;NUP153;OGG1;P2RX7;PANX1;PEX16;PEX6;PICK1;PIK3C3;PIP5K1A;PLEKHF1;PREB;RAB21;RAB25;RAB33A;RABEP2;RABGEF1;RAD21;RALGAPB;RBPMS;RINL;RPL13;RPL18;RPL18A;RPL28;RPL29;RPL38;RPL8;RPLP2;POLR2L;RABEP2;ROCK2;RPS6KB2;RPS6KC1;RPS6KL1;SPEG;SPHK2;STK25;TAOK3;TBGR4;TLK2;TNK1;TRIM24;TSSK6;TTN;UCK1;UCKL1;ULK3;ZAP;  
PEMT;PHF20;PPOX;RHOT2;SENP2;SLC25A19;SLC25A25;SLC25A29;SLC25A35;SLC25A5;SLC25A6;SLC29A2;SLC44A1;SMCR7;SPG20;STOML2;SURF1;TAZ;TIMM10;TIMM13;TIMM50;TOMM40L;TOR1AIP1;TPR;TRAF6;USP30;YME1

7;PDK4;PEMT;PHF20;PPOX;RHOT2;SENP2;SLC25A19;SLC25A25;SLC25A29;SLC25A35;SLC25A5;SLC25A6;SLC29A2;SLC44A1;SMCR7;SPG20;STOML2;SURF1;TAZ;TIMM10;TIMM13;TIMM50;TOMM40L;TOR1AIP1;TPR;TRAF6;USP30;YME1

EX16;PEX6;PICK1;PIK3C3;PIP5K1A;PREB;RAB21;RAB25;RAB33A;RABEP2;RABGEF1;RBPMS;RINL;RPL13;RPL18;RPL18A;RPL28;RPL29;RPL38;RPL8;RPLP1;RPLP2;RPS15;RPS2;RPS28;S100A13;SCARB2;SEC22B;SEC24B;SENP2;SERGEF;SLC25A6;SNF8;SNX20;SSR1;SSR4;STAM;STX1A;SYNGR1;SYTL1;TIMM10;TIMM

2F;POLR2G;POLR2I;POLR2L;PRMT7;RAD21;RAD9A;REC8;RECQL4;RNF169;RSF1;RTEL1;SETX;SLC50A1;STOML2;STRA13;STUB1;SWI5;TAOK3;TMEM161A;TOP1;TOP2A;TOP3B;TOPBP1;TP73;TPR;TREX2;TRIP12;TSSK6;TTN;WRAF

A;SURF1;TAZ;TBGR4;TXN2;TXNRD1;TYSND  
L18;RPL18A;RPL28;RPL29;RPL38;RPL8;RPLP1;RPLP2;RPS15;RPS2;RPU5D1;RPU5D3;RRP9;SNRPC;THOC6;TIMM50;TLR7;TPR;TRMT1;TRMT2A;TRMU;TRUB2;TUFM;TUT1;UPF2;WIBG;WRAP53;ZC3H4  
1;RPS6KL1;SPEG;SPHK2;STK25;TAOK3;TBGR4;TLK2;TNK1;TRIM24;TRPT1;TSSK6;TTN;UCK1;UCKL1;ULK3;ZAP7

GG1;PAFAH1B2;PARK7;PARP3;PDK4;PHLDA3;PIDD;PIK3C3;PLA2G6;PNKP;POLD1;POLD4;POLM;POLR2F;POLR2G;POLR2I;POLR2L;PREB;PSMA7;PSMB4;PSMB5;PSMB7;PSMD9;RAD21;RAD9A;RBBP5;RECQL4;RNF169;RTEL1;SERPINF2;SETX;SH2D3A;SH3RF1;SPRED2;SSR1;STRA13;STUB1;SWI5;TAOK3;TCEB2;T

IRPC;TBL3;TOP1;TXNL4A;WDR83;WRAP

P1;B3GALT6;B3GAT3;B4GALT2;B4GALT7;BABAM1;BHLHE41;BRAF;BRF1;BRF2;BTN2A1;BUB1B;C11orf30;C17orf70;C19orf10;C1orf86;C1QBP;C8G;CANX;CAPN10;CAPRIN1;CBR1;CCDC101;CCNL2;CD36;CD38;CDC25A;CDC6;CDK13;CDS2;CEL;CELF2;CELF6;CENPF;CHD7;CHTF18;CIB1;CLCF1;CLPP;CLSPN

;DNAL4;DPM3;DVL1;DYNC1L11;E2F1;E4F1;EDF1;EEF1A2;EEF1D;EEF1G;EIF2B2;EIF2B4;EIF3F;EIF3G;EIF3I;EIF3K;EIF4G3;ELP4;EPC1;ERCC1;ERLIN2;ETV3;EXOC6B;EXOSC5;FAF2;FAM21B;FAM98B;FANCG;FBXL15;FBXO2;FBXO24;FBXO44;FBXW11;FBXW5;FSD1;FXVD2;GAS2L3;GCHFR;GEMIN7;GET4;GGA1;GNAI  
GTF2A1;GTF3C5;H2AFY2;HDAC10;HDAC11;HESE6;HINFP;HIPK1;HIPK3;IMP4;INO80E;IPO8;IRF3;KAT2A;KDM5A;KDM6A;KIF20A;KRT18;LAT;LEMD2;LSM2;LSM4;MAD1L1;MAML2;MAPK1;MAPK11;MBD3;MCM7;MCRS1;MED1;MED13L;MED18;MGMT;MKI67;MLL3;MLL5;MOB2;MPG;MRPS15;MSH3;MUS81;N

2L3;GET4;GFER;GIMAP5;GNAI3;GOLPH3;H2AFY2;HAUS8;HDAC10;HDAC11;HOOK3;HPS3;HRAS;ITPA;KAT2A;KDM3A;KDM5A;KDM6A;KIF15;KIF20A;KIF24;KLHL12;KLHL17;LATS1;LATS2;MAD1L1;MAPK1;MBD3;MCRS1;MLL3;MLL5;MLST8;MRPL12;MSH3;MTFP1;MTM1;MYH10;MYLK3;NAGLU;NCAPH;

K;GNAI3;GNB2L1;GNG8;GNGT2;GPX4;HIPK3;HPX;HRAS;HSD17B12;ISYNA1;ITPA;KIDINS220;LAMTOR2;LATS1;LATS2;LIME1;LPAR1;LTK;MAGI3;MAP3K10;MAP4K2;MAPK1;MAPK11;MATK;MC1R;MCM7;MLST8;MPG;MTG1;MTM1;MTMR1;MUTYH;MVK;MYLK3;NDUFA3;NDUFA8;NDUF810;NDUF87;NDUF88  
3GAT3;B4GALT2;B4GALT7;BABAM1;BHLHE41;BRAF;BRF1;BRF2;BTN2A1;BUB1B;C11orf30;C17orf70;C19orf10;C1orf86;C1QBP;C8G;CANX;CAPN10;CAPRIN1;CCDC101;CCNL2;CD36;CD38;CDC25A;CDC6;CDK12;CDK13;CDS2;CEL;CELF2;CELF6;CENPF;CHD7;CHTF18;CIB1;CLCF1;CLPP;CLSPN;CPSF2;CPSF4;CPT1C  
2L1;GNG8;GNGT2;GPX4;HIPK3;HPX;HRAS;ISYNA1;ITPA;KIDINS220;LAMTOR2;LATS1;LATS2;LIME1;LPAR1;LTK;MAGI3;MAP3K10;MAP4K2;MAPK1;MAPK11;MATK;MC1R;MCM7;MLST8;MPG;MTG1;MTM1;MTMR1;MUTYH;MVK;MYLK3;NDUFA3;NDUFA8;NDUF810;NDUF87;NDUF88;NDUF89;NDUF56;NDUF5

8;DTD1;DUSP10;DUSP23;DUSP3;DYNC1L11;EEF1A2;EIF3F;ENGASE;ENTPD7;ERCC1;ERI3;EXD3;EXOSC5;FAHD2B;FIGNL2;FXVD2;GNAI3;GNG8;GNGT2;GTPBP3;GZMM;HAGHL;HDAC10;HDAC11;HDHD3;HELZ;HEXDC;HINT2;HRAS;ITPA;JOSD2;KIAA2018;KIF15;KIF20A;KIF24;KIF7;LONRF3;LYZ;MACROD1;

JUS1L;DUS2L;DUS3L;DYNC1L11;EEF1A2;EHHADH;EIF2B2;EIF3G;ETNK2;FASTK;FDXR;FICD;FIGNL2;FLAD1;FPGS;FUK;GCDH;GFER;GIMAP5;GLYCTK;GNAI3;GTPBP3;GTPBP6;HELZ;HIPK1;HIPK3;HNRNP3;HRAS;HSD11B1L;HSD17B1;HSD17B12;HSD17B8;IFT27;ILVBL;IRAK4;ISYNA1;ITPA;KHK;KIF15;KIF20A;KIF24;K  
AF4;TRAF6;TRIB3;TTN;VAV3;WNT7A;WRAP53;ZBTB17;ZEB2;ZFP91;ZP

;RBBP5;RFX3;RLIM;RSRC1;SENP2;SNF8;SNRPC;SPTBN4;STRA13;SUDS3;TADA3;TCEA2;THAP7;TIMM50;TOPBP1;TP73;TUT1;WRAP

;DUS3L;DYNC1L11;EEF1A2;EHHADH;EIF2B2;EIF3G;ETNK2;FASTK;FDXR;FICD;FIGNL2;FLAD1;FPGS;FUK;GCDH;GFER;GIMAP5;GLYCTK;GNAI3;GTPBP3;GTPBP6;HELZ;HIPK1;HIPK3;HNRNP3;HRAS;HSD11B1L;HSD17B1;HSD17B12;HSD17B8;IFT27;IRAK4;ISYNA1;ITPA;KHK;KIF15;KIF20A;KIF24;LATS1;LATS2;I



.;DUS3L;DYNC1L11;EEF1A2;EHHADH;EIF2B2;EIF3G;ETNK2;FASTK;FDXR;FICD;FIGNL2;FLAD1;FPGS;FUK;GCDH;GFER;GIMAP5;GLYCTK;GNAI3;GTPBP3;GTPBP6;HELZ;HIPK1;HIPK3;HNRNP3;HRAS;HSD11B1L;HSD17B1;HSD17B12;HSD17B8;IFT27;IRAK4;ISYNA1;ITPA;KHK;KIF15;KIF20A;KIF24;KIF7;LATS1;LATS2;

;ETNK2;FADS3;FDXR;FGD6;FICD;FLAD1;FPGS;GAMT;GCDH;GCHFR;GNAI3;GNB2L1;GNG8;GNGT2;GSTT1;GYG1;HAGHL;HRAS;HSD17B1;HSD17B12;HSD17B8;ISYNA1;ITPA;KDM3A;KHK;LHB;LMF1;MACROD1;MAPK1;MC1R;MECR;MED1;MLST8;MMAB;MPG;MRI1;MTG1;MTM1;MTMR1;MUT;MUTYH;MVD;M

I;TTN;VAV3;WNT7A;ZBTB17;ZEB2;ZFP91;ZP

P1;TOP2A;TPR;UCKL1;ZC3HAV1;ZNF274;ZNF394;ZNF446;ZNF500;ZSCAN:

P1;TOP2A;TPR;UCKL1;ZC3HAV1;ZNF274;ZNF394;ZNF446;ZNF500;ZSCAN:

ITOR2;LATS1;LATS2;LIME1;LMF1;LRRC32;MAL;MAMDC4;MAPK1;MED1;MIA3;MTM1;NDUFA13;NECAB3;NF1;NFKBIL1;NIPBL;NSF;NUP153;OGG1;OSBPL9;P2RX7;PANX1;PEX16;PEX6;PICK1;PIK3C3;PIP5K1A;PLA2G6;PLEKHF1;PREB;RAB21;RAB25;RAB33A;RABEP2;RABGEF1;RAD21;RALGAPB;RBPMS;RINL;RPI

ITM;PAOX;PARK7;PPOX;PTGES2;PYCRL;PYROXD2;SARDH;SDR39U1;SETD2;SURF1;TM7SF2;TXN2;TXNRD1;UEVLD;VKOR1

BTB17;ZEB2;ZFP91;ZP

1;BUB1;BUB1B;C12orf44;C19orf25;C19orf57;C19orf60;C1orf86;C1QBP;C1QTNF6;C8G;CANX;CAPN10;CCDC101;CCDC130;CCDC28B;CCDC47;CCNL2;CCS;CD320;CD36;CD8B;CDC25A;CDC6;CDCA8;CDK10;CDK12;CDK13;CDYL2;CENPF;CENPT;CHD7;CHMP6;CHRAC1;CIB1;CLASP1;CLCF1;CLDN7;CLIP1;CLPP;CLSI

PS15;RPS2;RPS28;SCARB2;SEC24B;SLC25A6;SPTBN4;SSNA1;SSR1;SSR4;STAM;STX1A;SYNGR1;SYTL1;TIMM10;TIMM13;TIMM50;TLR7;TOR1AIP1;TPR;TRPS1;UBL4A;VPS16;VPS41;VTI1A;WDR24;YWHAZ;ZFYVE27;Z

AR2A;PTPRC;RBPMS;SENP2;SPRED2;SPTBN4;SSR1;TADA3;TAOK3;TNFAIP3;TNFRSF4;TNFSF15;TP73;TRAF2;TRAF4;TRAF6;TRIB3;TTN;VAV3;WNT7A;ZBTB17;ZEB2;ZFP91;ZI

PS15;RPS2;RPS28;SCARB2;SEC24B;SLC25A6;SPTBN4;SSNA1;SSR1;SSR4;STAM;STX1A;SYNGR1;SYTL1;TIMM10;TIMM13;TIMM50;TLR7;TOR1AIP1;TPR;TRPS1;UBL4A;VPS16;VPS41;VT11A;WDR24;YWHAZ;ZFYVE27;Z

S2;RPS28;RQCD1;SMAP1;SOS1;STMN3;TNNT3;TPM2;UPF2;USP6NL;VAV3;WIBG;ZC3HA

ENPF;CHD7;CHTF18;CIB1;CLCF1;CLSPN;CPSF2;CPSF4;CREB3;CREB3L4;CSDE1;CSNK1G1;CTU2;DALRD3;DDX39A;DEAF1;DERL3;DGUOK;DNAJC17;DNAJC30;DNASE1L2;DOK7;DOLK;DPM3;DSE;DTX3;DUSP10;DUSP2;DUSP3;DVL1;E2F1;E4F1;EAF1;EDF1;EEF1D;EEF1G;EHHADH;EIF1;EIF2B2;EIF2B4;EIF3F;EIF3G;EI

;DHRS4;DOLK;DPM3;DSE;DTD1;DTYMK;DUSP10;ECI1;EDF1;EHHADH;ETFB;ETNK2;FADS3;FDX1L;FDXR;FGD6;FICD;FLAD1;FPGS;GAMT;GCDH;GCHFR;GIMAP5;GNAI3;GNB2L1;GNB8;GNGT2;GPX4;GSTT1;GYG1;HAGHL;HCCS;HINT2;HPX;HRAS;HSD17B1;HSD17B12;HSD17B8;ISYNA1;ITPA;KDM3A;KHK;LHB;LM

QLN1;UBXN1;USP34;USP8;USP9X;ZFP

IT;LATS1;LATS2;LIME1;LMF1;LRRC32;LTBP4;MAL;MAP4K2;MAPK1;MED1;MIA3;MTM1;MYH10;NDUFA13;NECAB3;NF1;NFKBIL1;NIPBL;NSF;NSRP1;NUP153;NUSAP1;OGG1;P2RX7;PANX1;PCSK4;PEX16;PEX6;PFKFB2;PHPT1;PICK1;PIK3C3;PIK3CG;PIPSK1A;PLA2G6;PLEKHF1;PREB;PRKAR2A;PSMD9;PTPRC;RAL;PIK3CB;PIK3CG;PIN1;PLA2G6;POLR2F;POLR2G;POLR2I;POLR2L;PREB;PRKAR2A;PTPRC;RBPMS;ROCK2;RSCR1;SENP2;SPRED2;SPTBN4;SSR1;TADA3;TAOK3;TLK2;TLR7;TNFAIP3;TNFRSF4;TNFSF15;TNK1;TP73;TRAF2;TRAF4;TRAF6;TRIB3;TRIM24;TSSK6;TTN;ULK3;WNT7A;ZAP70;ZBTB17;ZEB2;ZFP91;ZTMED1;TMED3;TMED9;TMEM147;TMEM189;UBXN1;USE1;VKORC1;YIPF5;ZFYVE

TPR;TRAPPC2L;TRAPPC4;TRPS1;UPF2;USE1;WDR24;YIPF5;YWH

i6;PREB;PRKAR2A;PSMA7;PSMB4;PSMB5;PSMB7;PSMD9;PTPRC;RBPMS;SENP2;SPRED2;SPTBN4;SSR1;STRA13;STUB1;TADA3;TAOK3;TNFAIP3;TNFRSF4;TNFSF15;TP73;TRAF2;TRAF4;TRAF6;TRIB3;TRIP12;TTN;UBQLN1;UBXN1;WNT7A;ZBTB17;ZEB2;ZFP91;ZK11;MATK;MCM7;MKI67;MMAB;MSH3;MVD;MVK;MYH10;MYLK3;NDUFA13;NME3;NME4;NSF;NUBP2;OXSR1;P2RX6;P2RX7;PANK4;PAPSS1;PARS2;PDK4;PEX6;PFKFB2;PHK1;PIK3C3;PIK3CB;PIK3CG;PIPSK1A;PIPSK1B;PIPSK1L;PMVK;PNKP;QARS;RABEP2;RECQL4;ROCK2;RPS6KB2;RPS6K1;RPS6KL1;RTEL1;

Z;ZC3HA

RMD3;FSD1;GAS2L3;GLTSCR2;GNAI3;GNB2L1;GRIN3A;H2AFJ;H2AFY2;HAUS8;HIP1R;HOOK3;IFFO1;IMP4;INO80E;IQGAP2;ITGB1BP2;KAT2A;KDM5A;KIF15;KIF20A;KIF24;KIF7;KLHL17;KRT18;LARP4B;LATS1;LATS2;LRRC45;LSM14A;MAD1L1;MAPK1;MBD3;MBD5;MCL1R;MCM7;MCRS1;MED1;MKI67;MOB2;MRD3;FSD1;GAS2L3;GLTSCR2;GNAI3;GNB2L1;GRIN3A;H2AFJ;H2AFY2;HAUS8;HIP1R;HOOK3;IFFO1;IMP4;INO80E;IQGAP2;ITGB1BP2;KAT2A;KDM5A;KIF15;KIF20A;KIF24;KIF7;KLHL17;KRT18;LARP4B;LATS1;LATS2;LRRC45;LSM14A;MAD1L1;MAPK1;MBD3;MBD5;MCL1R;MCM7;MCRS1;MED1;MKI67;MOB2;M1;MAPK11;MATK;MCM7;MKI67;MMAB;MSH3;MVD;MVK;MYH10;MYLK3;NDUFA13;NME3;NME4;NSF;NUBP2;OXSR1;P2RX6;P2RX7;PANK4;PAPSS1;PARS2;PDK4;PEX6;PFKFB2;PHK1;PIK3C3;PIK3CB;PIK3CG;PIPSK1A;PIPSK1B;PIPSK1L;PMVK;PNKP;PRKAR2A;QARS;RABEP2;RECQL4;ROCK2;RPS6KB2;RPS6K1;

CD36;CD38;CDC25A;CDC6;CDK12;CDK13;CEL;CELFF2;CELFF6;CENPF;CHD7;CHTF18;CIB1;CLCF1;CLPP;CLSPN;CPSF2;CPSF4;CREB3;CREB3L4;CRIP1;CSDE1;CSNK1G1;CTSC;CTSF;CTU2;DALRD3;DDX39A;DEAF1;DERL3;DGUOK;DNAJC17;DNAJC30;DNASE1L2;DND1;DOK7;DOLK;DPM3;DPP7;DPP8;DSE;DTX3;DUSP11;USP30;USP34;USP8;USP9X;WIBG;YME1L1;ZC3HA

SSR1;TADA3;TAOK3;TNFAIP3;TNFRSF4;TNFSF15;TP73;TRAF2;TRAF4;TRAF6;TRIB3;TTN;WNT7A;ZBTB17;ZEB2;ZFP91;ZFI;MAPK11;MATK;MCM7;MKI67;MMAB;MSH3;MVD;MVK;MYH10;MYLK3;NDUFA13;NME3;NME4;NSF;NUBP2;OXSR1;P2RX6;P2RX7;PANK4;PAPSS1;PARS2;PDK4;PEX6;PFKFB2;PHK1;PIK3C3;PIK3CB;PIK3CG;PIPSK1A;PIPSK1B;PIPSK1L;PMVK;PNKP;PRKAR2A;QARS;RABEP2;RECQL4;ROCK2;RPS6KB2;RPS6K1;

'PS16;VPS41;VT11A;WDR24;YWHAZ;ZI

řPS15;RPS2;RPS28;RQCD1;SGSM3;STUB1;TLK2;TNFAIP3;TRAF2;TRIM24;TRIP12;UBA7;UBXN1;UPF2;USE1;USP30;USP34;USP8;USP9X;WIBG;YME1L1;ZC3HA'

11;MIF4GD;MLST8;MYLIP;NDUFA13;NF1;NIPBL;NOG;NRP1;P2RX7;PDE6G;PIK3CB;PIK3CG;PIN1;PLA2G6;PREB;PRKAR2A;PSMA7;PSMB4;PSMB5;PSMB7;PSMD9;PTPRC;RBPMS;RPS6KB2;SENP2;SPRED2;SPTBN4;SSR1;STRA13;STUB1;TADA3;TAOK3;TLK2;TNFAIP3;TNFRSF4;TNFSF15;TP73;TPR;TRAF2;TRAF4;TF

TMED1;TMED3;TMED9;TMEM147;TMEM189;UBXN1;USE1;VKORC1;YIPF5;ZFYVE  
L;RPLP2;RPS15;RPS2;RPS28;RQCD1;SMAP1;SOS1;STMN3;STS;TNNT3;TPM2;UPF2;USP6NL;VAV3;WIBG;ZC3HA'

L18;RPL18A;RPL28;RPL29;RPL38;RPL8;RPLP1;RPLP2;RPS15;RPS2;RPS28;RSRC1;SCARB2;SEC22B;SEC24B;SLC25A5;SLC25A6;SNF8;SSNA1;SSR1;SSR4;STAM;STOML2;STX1A;SYNGR1;SYTL1;THOC6;TIMM10;TIMM13;TIMM50;TLR7;TMED9;TPR;TRAPPC2L;TRAPPC4;TRPS1;UPF2;USE1;USP6NL;VPS16;VPS41;VT1  
6;ARIH1;ARL16;ARL6IP4;ARNTL;ASH1;ASPSR1;ASXL2;ATAD3B;ATF4;ATF7IP;ATL3;ATP5D;ATP5G2;ATP5G3;ATP6AP2;ATP6V1C1;ATRIP;AVEN;B3GAT3;B4GALT2;B4GALT7;BABAM1;BAIAP2L2;BCL7B;BCS1L;BHLHE41;BMP2K;BOK;BRAF;BRAT1;BRF1;BRF2;BUB1;BUB1B;C12orf44;C17orf49;C17orf70;C19orf25

;IRAK4;KHK;KIF15;KIF20A;KIF24;KIF7;LATS1;LATS2;LTK;MAGI3;MAP3K10;MAP4K2;MAPK1;MAPK11;MATK;MCM7;MKI67;MMAB;MSH3;MTG1;MVD;MVK;MYH10;MYLK3;NDOR1;NDUFA13;NDUFV1;NME3;NME4;NSF;NUBP2;OXSR1;P2RX6;P2RX7;PANK4;PAPSS1;PARS2;PDE6G;PDK4;PEX6;PFKFB2;PHKG1;P  
'S15;RPS2;RPS28;RQCD1;SMAP1;SOS1;STMN3;TNNT3;TPM2;UPF2;USP6NL;VAV3;WIBG;ZC3HA'  
'S15;RPS2;RPS28;RQCD1;SMAP1;SOS1;STMN3;TNNT3;TPM2;UPF2;USP6NL;VAV3;WIBG;ZC3HA'  
P2;TP73;TRAF2;TRAF4;TRAF6;TRIB3;WNT7A;ZC3HAV1;ZEB2;ZF

11  
JUFB8;NECAB3;P4HTM;PANX1;PCYT2;PEMT;PEX16;PHEX;PIGQ;POMT1;PPM1L;PREB;PTDSS2;PTPLB;RAB21;RTN4R;SEC22B;SEC24B;SELM;SLC26A11;SLC37A4;SOAT1;SOAT2;SPPL2A;SPPL2B;SSR1;SSR4;STS;TLR7;TM7SF2;TMED1;TMED3;TMED9;TMEM147;TMEM189;TMTC2;TRAPPC2L;TRAPPC4;TRAPPC6A;  
'FB2;PGM2;PHEX;PICK1;PIGQ;PIK3C3;PIK3CB;PIK3CG;PIN1;PIP5K1A;PIP5K1B;PLA2G6;PLCD1;PMM1;PMVK;PNKP;PPAP2C;PPM1L;PTDSS2;PKX;RAB21;RAB33A;RAC3;RALGAPB;RASA2;SLC44A1;SMAP1;SMPD2;SOS1;SPHK2;STMN3;STOML2;STS;SURF1;TAZ;TNNT3;TPM2;TXNRD1;UCK1;UCKL1;USP6NL;VAV3;

'S15;RPS2;RPS28;RQCD1;SMAP1;SOS1;STMN3;TNNT3;TPM2;UPF2;USP6NL;VAV3;WIBG;ZC3HA'





;ATF2;ATG5;ATRX;ATXN7L3;AZIN1;BACH1;BAG4;BAG6;BAZ1A;BAZ2B;BBX;BCLAF1;BDP1;BIN1;BIRC2;BIRC3;BLOC1S2;BLZF1;BMI1;BMPR1A;BMPR2;BNIP2;BRCA2;BRCC3;BRD9;BRIP1;BRMS1;BRMS1L;BRWD1;BTAFA1;BZW1;C12orf52;C14orf166;CAB39;CAB39L;CALCLR;CAMK1;CAMK4;CARHSP1;CASP3;CASP8AP2;C

RIDS5;ARIS5B;ARL2;ARPPP19;ARRB1;ARRC2;ARV1;ASAP3;ASF1A;ASPH;ASTL;ATAD1;ATAD2;ATF2;ATG5;ATP7A;ATRX;ATXN7L3;AZIN1;BACH1;BAG4;BAG6;BAZ1A;BAZ2B;BBX;BCAP31;BCLAF1;BDP1;BIN1;BIRC2;BIRC3;BLOC1S2;BLZF1;BMI1;BMPR1A;BMPR2;BNIP2;BRCA2;BRCC3;BRD9;BRIP1;BRMS1;TP11B;ATP11C;ATP13A2;ATP13A3;ATP2B1;ATP2C1;ATP6A1;ATP7A;ATP8A1;ATP8A2;ATP8B4;ATP8D4;ATRX;AURKC;BBS10;BBS12;BCR;BMPR1A;BMPR2;BRIP1;BTAFA1;C10orf2;CAMK1;CAMK2D;CAMK4;CBWD1;CBWD2;CCT2;CCT6B;CD7;CDK1;CDK11A;CDK11B;CDK17;CDK18;CDK2;CDK7;CDK8;CDK9;CDK

f52;C14orf166;CALCLR;CAMK4;CARHSP1;CASP8AP2;CBFB;CBX3;CCDC59;CCDC88A;CCNA2;CCNC;CCNH;CCNL1;CCNT2;CD28;CD80;CD73;CDCA7;CDK1;CDK11A;CDK11B;CDK2;CDK5R1;CDK5RAP3;CDK7;CDK8;CDK9;CDKN1B;CDKN1C;CDT1;CEBPA;CEBPB;CEBPZ;CENPK;CEP290;CGGBP1;CHAF1A;CHAF1B;CHD1;CHD5;CHD9;CHMP1A;CHUK;CHURC1;CKAP2;CNBP;CNOT2;CNOT3;CNOT6;CNOT7;KLHL9;LRRCC1;MAD2L1;MAP9;MDK;MIS18BP1;MLF1P;MPOHSPH6;NDE1;NEDD1;NEK1;NSL1;NSMCE2;NUDC;NUF2;NUP37;NUP85;OIP5;PAPD5;PBK;PDSSB;PE1;PHIP;PMF1;PPP1CC;PPP1R12A;PPP5C;PTEN;RANGAP1;RB1;RBBP8;RPS27;RRS1;SEC13;SEPT7;SETDB2;SGOL2;SIRT2;SKA2;SMC2;SMC4;SMC5;SPAG5;SSSCA1;ST

;ATL2;ATG5;ATRX;ATXN7L3;AZIN1;BACH1;BAG4;BAG6;BAZ1A;BAZ2B;BBX;BCLAF1;BDP1;BIN1;BIRC2;BIRC3;BLOC1S2;BLZF1;BMI1;BMPR1A;BMPR2;BNIP2;BRCA2;BRCC3;BRD9;BRIP1;BRMS1;BRMS1L;BRWD1;BTAFA1;BZW1;C12orf52;C14orf166;CAB39;CAB39L;CALCLR;CAMK1;CAMK4;CARHSP1;CASP3;CASP8AP2;C

F4;GALNT1;GALNT3;GALNT4;GALNT7;GA56;GCNT1;GCNT2;GCNT4;GLCE;GOLGA4;GOLPH3L;GOLTP1B;GOPC;GORASP1;GPC1;GPSM1;GYLT1;HACE1;HLA-A;HLA-DPB1;HLA-DRA;HSA21;HS65T1;LEPROT;LFNG;LLG1;LMAN1;LMAN2;LPCAT1;LPCAT2;MAN1A1;MAN1A2;MAN2A1;MANEA;MAP6D1;MBTPS2;M

;EIF5A2;ELOVL4;EPT1;ERGC2;ERLIN1;ERN1;EROL1;EROL1B;EXTL2;FAM69A;FAR2;FDT1;FITM1;FMOS;G6PC3;GPSM1;HLA-A;HLA-DPB1;HLA-DRA;HMOX2;IER3IP1;INSIG1;INSIG2;ITPR2;JKAMP;KTN1;LCLAT1;LMAN1;LMAN2;LPCAT1;LPCAT2;LPCAT4;LPGAT1;LRMP;LRRCC8;MAGT1;MAPK8IP1;MAR3H1;MAR

ARHSP1;CASP8AP2;CBFB;CBX3;CCDC59;CCNA2;CCNC;CCNH;CCNL1;CCNT2;CD28;CD80;CD40;CD73;CDCA7;CDK1;CDK11A;CDK11B;CDK2;CDK5R1;CDK5RAP3;CDK7;CDK8;CDK9;CDKN1B;CDKN1C;CDT1;CEBPA;CEBPB;CEBPZ;CENPK;CEP290;CGGBP1;CHAF1A;CHAF1B;CHD1;CHD5;CHD9;CHMP1A;CHUK;CHL

;EIF5A2;ELOVL4;EPT1;ERGC2;ERLIN1;ERN1;EROL1;EROL1B;EXTL2;FAM69A;FAR2;FDT1;FITM1;FMOS;G6PC3;GPSM1;HLA-A;HLA-DPB1;HLA-DRA;HMOX2;IER3IP1;INSIG1;INSIG2;ITPR2;JKAMP;KTN1;LCLAT1;LMAN1;LMAN2;LPCAT1;LPCAT2;LPCAT4;LPGAT1;LRMP;LRRCC8;MAGT1;MAPK8IP1;MAR3H1;MAR

ARHSP1;CASP8AP2;CBFB;CBX3;CCDC59;CCNA2;CCNC;CCNH;CCNL1;CCNT2;CD28;CD80;CD40;CD73;CDCA7;CDK1;CDK11A;CDK11B;CDK2;CDK5R1;CDK5RAP3;CDK7;CDK8;CDK9;CDKN1B;CDKN1C;CDT1;CEBPA;CEBPB;CEBPZ;CENPK;CEP290;CGGBP1;CHAF1A;CHAF1B;CHD1;CHD5;CHD9;CHMP1A;CHUK;CHL

ARHSP1;CASP8AP2;CBFB;CBX3;CCDC59;CCNA2;CCNC;CCNH;CCNL1;CCNT2;CD28;CD80;CD40;CD73;CDCA7;CDK1;CDK11A;CDK11B;CDK2;CDK5R1;CDK5RAP3;CDK7;CDK8;CDK9;CDKN1B;CDKN1C;CDT1;CEBPA;CEBPB;CEBPZ;CENPK;CEP290;CGGBP1;CHAF1A;CHAF1B;CHD1;CHD5;CHD9;CHMP1A;CHUK;CHL

;EIF5A2;ELOVL4;EPT1;ERGC2;ERLIN1;ERN1;EROL1;EROL1B;EXTL2;FAM69A;FAR2;FDT1;FITM1;FMOS;G6PC3;GPSM1;HLA-A;HLA-DPB1;HLA-DRA;HMOX2;IER3IP1;INSIG1;INSIG2;ITPR2;JKAMP;KTN1;LCLAT1;LMAN1;LMAN2;LPCAT1;LPCAT2;LPCAT4;LPGAT1;LRMP;LRRCC8;MAGT1;MAPK8IP1;MAR3H1;MAR

;EIF5A2;ELOVL4;EPT1;ERGC2;ERLIN1;ERN1;EROL1;EROL1B;EXTL2;FAM69A;FAR2;FDT1;FITM1;FMOS;G6PC3;GPSM1;HLA-A;HLA-DPB1;HLA-DRA;HMOX2;IER3IP1;INSIG1;INSIG2;ITPR2;JKAMP;KTN1;LCLAT1;LMAN1;LMAN2;LPCAT1;LPCAT2;LPCAT4;LPGAT1;LRMP;LRRCC8;MAGT1;MAPK8IP1;MAR3H1;MAR

AURKC;BBS10;BBS12;BCR;BMPR1A;BMPR2;BRIP1;BTAF1;C10orf2;CAMK1;CAMK2D;CAMK4;CBWD1;CBWD2;CCT2;CCT6B;CDC7;CDK1;CDK11A;CDK11B;CDK17;CDK18;CDK2;CDK7;CDK8;CDK9;CDKL1;CDKL2;CENPE;CHD1;CHD5;CHD9;CHUK;CKB;CLCN7;CLK1;CLK3;CLK4;CLP1;CMPK1;COASY;CSK;CSNK1A1;CSF  
MAP6D1;MARK4;MID1IP1;NDE1;NEK7;NIN;PEX14;PKD2;PLK1S1;PLK4;PPP1R12A;PPP4C;PRKC2;RB1;RNF19A;RSPH4A;SASS6;SENP6;SKA2;SLAIN2;SPAG5;SPAST;SPIRE2;SS18;TBCD;TPPP3;TRPV4;TTK;TTLL1;TUBA1B;TUBE1;TUBG1;TUBGCP2;WEE1;XPC  
LOC1S2;BLZF1;BMI1;BMPR1A;BMPR2;BRCA2;BRD9;BRIP1;BRMS1;BRMS1L;BRWD1;BTAF1;BZW1;C10orf2;C12orf52;C14orf166;CALCLR;CAMK4;CARHSP1;CASP8AP2;CBFB;CBX3;CCDC59;CCNA2;CCNC;CCNH;CCNL1;CCNT2;CD28;CD80;CDC40;CDC73;CDCA7;CDK1;CDK11A;CDK11B;CDK2;CDK5R1;CDK5RAP3;  
V3;SLC9A6;SNX10;SNX13;SNX16;SNX18;SNX2;SNX25;SNX3;SNX4;SNX8;STAM2;STARD3;STARD3NL;STEAP2;STX7;TAB1;TAB2;TAB3;TBK1;TICAM1;TLR8;TMEM106B;TMEM184A;TMEM55A;UBC;UBE2D3;VAC14;VAMP7;VPS18;VPS26A;VPS28;VPS29;VPS33B;VPS37A;VPS37B;VPS4A;VPS4B;VTA1;WDR44;ZFYV1

;PIGW;PRKCSH;PROC;PROZ;SAR1B;SEC13;SEC23A;SEC24A;STT3B;SUMF2;UGG1

SL1;SLC29A3;SLC9A6;SNX10;SNX13;SNX16;SNX18;SNX2;SNX25;SNX3;SNX4;SNX8;STAM2;STARD3;STARD3NL;STEAP2;STX7;TAB1;TAB2;TAB3;TBK1;TICAM1;TLR8;TMEM106B;TMEM184A;TMEM55A;UBC;UBE2D3;VAC14;VAMP7;VPS18;VPS26A;VPS28;VPS29;VPS33B;VPS37A;VPS37B;VPS4A;VPS4B;VTA1;WI

AURKC;BBS10;BBS12;BCR;BMPR1A;BMPR2;BRIP1;BTAF1;C10orf2;CAMK1;CAMK2D;CAMK4;CBWD1;CBWD2;CCT2;CCT6B;CDC7;CDK1;CDK11A;CDK11B;CDK17;CDK18;CDK2;CDK7;CDK8;CDK9;CDKL1;CDKL2;CENPE;CHD1;CHD5;CHD9;CHUK;CKB;CLCN7;CLK1;CLK3;CLK4;CLP1;CMPK1;COASY;CSK;CSNK1A1;CSF  
C2P1;TRAPPC8;USO1;VAMP4;VAMP7;VPS13A;YKT

BNIP2;BRCA2;BRCC3;BRD9;BRIP1;BRMS1;BRMS1L;BRWD1;BTAF1;BZW1;C12orf52;C14orf166;CALCLR;CAMK4;CARHSP1;CASP8AP2;CBFB;CBX3;CCDC59;CCDC88A;CCNA2;CCNC;CCNH;CCNL1;CCNT2;CD28;CD80;CDC42EP2;CDC73;CDCA7;CDK1;CDK11A;CDK11B;CDK2;CDK5R1;CDK5RAP3;CDK7;CDK8;CDK9;C  
LZF1;BMI1;BMPR1A;BMPR2;BRCA2;BRD9;BRIP1;BRMS1;BRMS1L;BRWD1;BTAF1;BZW1;C10orf2;C12orf52;C14orf166;CALCLR;CAMK4;CARHSP1;CASP8AP2;CBFB;CBX3;CCDC59;CCNA2;CCNC;CCNH;CCNL1;CCNT2;CD28;CD80;CDC40;CDC73;CDCA7;CDK1;CDK11A;CDK11B;CDK2;CDK5R1;CDK5RAP3;CDK7;CDK

SWAP;SIRT1;SKIV2L2;SLU7;SNRBP;SNRPD1;SNRPE;SNRPG;SRSF10;SRSF6;SURF6;SUV39H1;UTP11L;UTP14C;UTP15;UTP23;WDR

\_RWD1;LSM11;MAP3K11;MCM5;MDM2;MNAT1;MTBP;MUC1;NBN;NDE1;NEDD1;NFATC1;ORC2;ORC3;ORC4;PKD2;PKIA;PLCB1;PLK4;POLD2;PPAT;PPP2R1A;PPP3CA;PPP6C;PSMA1;PSMA2;PSMA3;PSMA4;PSMA6;PSMA8;PSMB1;PSMB3;PSMC1;PSMC2;PSMC3;PSMC5;PSMC6;PSMD10;PSMD13;PSMD14;PS  
V1G1;ATP8A1;AURKC;BAG4;BAG6;BCAP29;BCAP31;BET1;BLZF1;BMPR1A;BORA;BUD13;C5orf30;CALCLR;CAMK4;CARD8;CASCS;CCDC91;CCT6B;CD27;CD27A;CD63;CD81;CDC37;CDC40;CDK1;CDK5R1;CEP120;CEP250;CEP290;CEP57;CEP57L1;CHCHD4;CHERP;CHM;CHML;CHMP1A;CHMP1B;CHMP2  
BCR;BIN1;BIRC3;BMPR1A;BMPR2;BRIP2;CBAB3;CACNB4;CALCLR;CAMK1;CAMK2D;CAMK4;CASCS;CASP3;CCDC88A;CCNA2;CCNC;CCND3;CCNE2;CCNG1;CCNH;CCNL1;CCNT2;CCNY;CCNYL1;CD28BP2;CD80;CD81;CDC25C;CDC37;CDC42EP2;CDIPT;CDK1;CDK11A;CDK11B;CDK17;CDK18;CDK2;CDK5R1;CDK5RA  
P1A;BMPR2;BRCA2;BRD9;BRIP1;BRMS1;BRMS1L;BRWD1;BTAF1;BZW1;C10orf2;C12orf52;C14orf166;CALCLR;CAMK4;CARHSP1;CASP8AP2;CBFB;CBX3;CCDC59;CCNA2;CCNC;CCNH;CCNL1;CCNT2;CD28;CD80;CDC40;CDC73;CDCA7;CDK1;CDK11A;CDK11B;CDK2;CDK5R1;CDK5RAP3;CDK7;CDK8;CDK9;CDKN1

\_RWD1;LSM11;MAP3K11;MCM5;MDM2;MNAT1;MTBP;MUC1;NBN;NDE1;NEDD1;NFATC1;ORC2;ORC3;ORC4;PKD2;PKIA;PLCB1;PLK4;POLD2;PPAT;PPP2R1A;PPP3CA;PPP6C;PSMA1;PSMA2;PSMA3;PSMA4;PSMA6;PSMA8;PSMB1;PSMB3;PSMC1;PSMC2;PSMC3;PSMC5;PSMC6;PSMD10;PSMD13;PSMD14;PS  
APK2;MCM5;MDM2;MEN1;MSH2;MTBP;MUC1;NBN;ORC2;ORC3;ORC4;PKD2;PLAGL1;PPM1G;PPP1R15A;PRCC;PRKAA1;PRKAB2;PRKACB;PRKAG2;PSMA1;PSMA2;PSMA3;PSMA4;PSMA6;PSMA8;PSMB1;PSMB3;PSMC1;PSMC2;PSMC3;PSMC5;PSMC6;PSMD10;PSMD13;PSMD14;PSMD4;PSMD8;PSME1;PTE

P2K2;MAP3K7;MARCH1;MCOLN1;MITD1;MTMR2;NDFIP1;NDFIP2;NIPA1;OCIAD1;PIKFYVE;PKN1;PRDX3;PRKC1;PRKC2;PTP4A1;PTPN23;RAB10;RAB11B;RAB11FIP2;RAB12;RAB14;RAB22A;RAB27B;RAB4A;RAB5A;RABEP1;RAP2A;RAP2C;RET;RNF11;RNF13;SCAMP1;SCOC;SCYL2;SDF4;SH3GL1;SIAH1;SLC29A3

I;PSMD4;PSMD8;PSME1;RAD17;RB1;RBBP8;RFC2;RFC3;RFC5;RFWD2;RINT1;RPS27L;TAOK1;TIPLR;TP63;TRIP1;TTK;UBC;UBE2D1;UBE2E1;USP44;WEE1;ZWILC

0;PSMD13;PSMD14;PSMD4;PSMD8;PSME1;RAD17;RASSF1;RB1;RBBP8;RFC2;RFC3;RFC5;RFWD2;RINT1;RPS27L;RRP8;TAOK1;TFAP4;TIPLR;TP63;TRIP1;TTK;UBC;UBE2D1;UBE2E1;USP44;WEE1;ZWILC

RARS2;RPF1;RPL11;RPL26;RPL7;RPS24;RPS7;RRP1;RRP36;RRP8;SEPSecs;SIRT1;SKIV2L2;SMAD2;SNRBP;SNRPD1;SNRPE;SNRPG;SUV39H1;TARS2;TRDMT1;TRMT12;TRNT1;TRUB1;TYW3;TYW5;UTP11L;UTP14C;UTP15;UTP23;VAR5;WARS2;WDR36;XR

F1;ITGB3BP;KATNB1;KIAA1009;KIF11;KIF18A;KIF20B;KIF22;KIF23;KIF24;KIFC1;KLHDC3;KLHL9;KPN2A;LEPRL4;LFG;LRRCC1;MAD2L1;MAP9;MDK;MIS18BP1;MLF1IP;MPHOSPH6;MSH2;NBN;NDE1;NEDD1;NEK1;NEK7;NSL1;NSMCE2;NUDC;NUF2;NUP37;NUP85;OIP5;OSGIN2;PAPD5;PBK;PDS5B;PES1;PHIP;F

;DLG1;DMPK;DYRK1A;DYRK1B;DYRK2;EFNA3;ENG;EPHB3;EPHB6;ERCC2;ERN1;ETNK1;FAM20C;FASTKD1;FASTKD3;FER;FGFR1OP;FGFR4;FN3G;GAK;GK;GRK6;GTF2H1;GTF2H4;GUCY2C;ICK;ILK;IPMK;ITPKC;JAK2;KIAA1804;KNDC1;LRRK2;MAP2K2;MAP2K4;MAP2K5;MAP3K1;MAP3K13;MAP3K14;M  
J56;HAUS7;HELLS;ITGB3BP;KATNB1;KIAA1009;KIF11;KIF20B;KIF23;KIF24;KIFC1;KLHL22;KLHL9;LIG4;LRP6;LRRCC1;MAD2L1;MAP9;MDK;MEN1;MIS18BP1;MITD1;NDE1;NEK1;NEK7;NSL1;NSMCE2;NUDC;NUF2;NUP37;OIP5;PAPD5;PAR6B;PDCD6IP;PDS5B;PKN2;PMF1;PPP1CA;PPP1CB;PPP1CC;PRPF

H;CDC26;CDC27;CDC42EP2;CDK1;CDK2;CDK7;CDKN1B;CHFR;CHD1;CHN2;CLN3;CLN5;CLN6;CNN3;CNOT2;CNOT3;CNOT6;CNOT6L;CNOT7;CNOT8;CNP;CNR1;COLQ;COMT;CRAT;CRBN;CRK;CROT;CST3;CTBS;CTSH;CUL2;CUL4B;CUL5;CYCS;DAB2IP;DAGLB;DCP1A;DCP2;DCPS;DDB2;DDX3X;DECR1;DERL1;DHPS

I;SGMS2;SLC24A6;SSR3;ST8SIA4;STEAP2;SYP;TECR;TIMM17A;TIMM23;TMEM66;TMEM70;TOMM40;WF

ERN1;FAM20C;FASTKD1;FASTKD3;FER;FGFR1OP;FGFR4;GAK;GRK6;GTF2H1;GTF2H4;GUCY2C;ICK;ILK;JAK2;KIAA1804;KNDC1;LRRK2;MAP2K2;MAP2K4;MAP2K5;MAP3K1;MAP3K11;MAP3K13;MAP3K14;MAP3K2;MAP3K7;MAP3K8;MAP4K1;MAP4K3;MAP4K5;MAPK6;MAPK8;MAPKAPK2;MAPKAPK3;MARK4  
RPS17;MRPS18B;MRPS18C;MRPS22;MRPS28;MRPS31;MRPS33;MTERF;NARS2;NR3C1;OXCT1;PC;PCK2;PDHX;PDK1;PDK2;PDP1;PIN4;PMPCA;POLIP2;POLG2;PPIF;RARS2;SHMT2;SUCLA2;SUCLG2;SUOX;TARS2;TFAM;TOP1MT;WAR

1;BDP1;BIRC2;BLOC1S2;BLZF1;BMI1;BMPR1A;BMPR2;BRCA2;BRD9;BRIP1;BRMS1;BRMS1L;BRWD1;BTAF1;BZW1;C10orf2;C12orf52;C14orf166;CACNA1H;CALCLR;CAMK4;CARHSP1;CASP8AP2;CBFB;CBX3;CCDC59;CCNA2;CCNC;CCNH;CCNL1;CCNT2;CD28;CD80;CDC40;CDC73;CDCA7;CDK1;CDK11A;CDK11B

IF1;STRADA;WDTC

;SNRPD1;SNRPE;SNRPG;SRSF10;SRSF11;SRSF3;SRSF6;SUGP1;TIA1;TRA2A;TRA2B;U2AF1;WBP4;XAB2;ZCCHC

3K11;MAP3K13;MAP3K2;MAPK6;MAPK8IP1;MAPK8IP2;MEF2A;MSH2;NBEA;NFATC1;PARK2;PAX6;PDE3B;PDLIM5;PFKL;PFKM;PJA2;PKN1;PLK1S1;PPP1CB;PPP1CC;PPP1R12A;PPP2R5A;PRDX3;PRKAA1;PRKAG2;PRKCSH;PRKC2;PRPSAP1;PTEN;PTPN22;RAB11FIP2;RB1;RB1CC1;RHEB;RNF138;RPS6KA3;RPS6P  
3;DYRK2;EFNA3;ENG;EPHB3;EPHB6;ERCC2;ERN1;ETNK1;FAM20C;FASTKD1;FASTKD3;FER;FGFR1OP;FGFR4;GAK;GK;GRK6;GTF2H1;GTF2H4;GUCY2C;ICK;ILK;IPMK;ITPKC;JAK2;KIAA1804;KNDC1;LRRK2;MAP2K2;MAP2K4;MAP2K5;MAP3K1;MAP3K11;MAP3K13;MAP3K14;MAP3K2;MAP3K7;MAP3K8;MAP4K1;  
1;NBN1;KLHL2;KPN2A;KPN3A;KPN4A;MDFIC;MDM2;MFF;MGEA5;MTX2;MTX3;NAGPA;NAPB;NAPC;NCKIPSD;NEDD4;NEMF;NFKBIE;NOP58;OSBPL5;P2RX4;PEX1;PEX12;PEX13;PEX14;PEX2;PEX3;PHAX;PHIP;PKD2;PKIA;PMPCA;PPP3CA;PSMD10;PTGS2;RAB10;RAB3GAP2;RAB6A;RAB8B;R  
JBE2E1;UBE2N;UBRS;USP44;VPS28;WF

CYCS;CYHR1;DDX3X;DHLRF1;DHRS1;DMPK;DTX2;EIF5A2;ERAL1;ERBB2IP;ERN1;FAM169A;FAM188A;FANCL;GCH1;GK;GMCL1;GPAM;GPAT2;GPD2;GRPEL2;GUF1;HIGD1A;HMGCL;HSD17B10;IDH2;IL4I1;IMMP1L1;INTS2;IPO11;IPO13;IPO4;KMO;KPN3A;L2HGDDH;LEMD3;LMNA;LMNB2;LRRK2;MAD2L1;MAPK8I  
A;LYST;MALT1;MAP2K2;MDFIC;MDM2;MFF;MGEA5;MON2;MTMR2;MTX2;MTX3;NAGPA;NCKIPSD;NEDD4;NEMF;NFKBIE;NOP58;OSBPL5;P2RX4;PEX1;PEX12;PEX13;PEX14;PEX2;PEX3;PHAX;PHIP;PKD2;PKIA;PMPCA;PPP3CA;PSMD10;PTGS2;RAB10;RAB12;RAB14;RAB2A;RAB3IP;RAB6A;RAB8B;RAB9B;RAE1

RPL39L;RPL41;RPL7;RPL9;RPS15A;RPS24;RPS27;RPS27L;RPS29;RPS3A;RPS7;SERP1;ZCCHC

1;HAUS7;HINT3;HMGNS;IDH3G;INO80C;JMJD6;KIAA0020;KIF20B;KLHL7;KRR1;LEPREL4;LIN28A;LYAR;MAK16;MAN1A2;MBIP;MDFIC;MDM2;MINA;MKI67IP;MORF4L2;MPHOSPH6;NBN;NEK1;NKRF;NMD3;NOC2L;NOC3L;NOC4L;NOL6;NOP2;NOP56;NOP58;NSA2;NUDT16;OLA1;OXR1;PES1;PHF6;PIN4;PLK4

MRPL37;MRPL42;MRPL47;MRPL48;MRPS10;MRPS17;MRPS18B;MRPS18C;MRPS2;MRPS33;MTIF3;MTRF1;NARS2;NCK1;PAIP1;PAIP2;PIWIL4;POLG2;PPA1;PPP1R15A;PPP1R15B;PUM2;QKI;RARS2;RBM3;RBM4;RMND1;RNF139;RPL11;RPL15;RPL17;RPL22L1;RPL23;RPL26;RPL26L1;RPL27;RPL30;RPL31;RPL34  
;CHORDC1;CKS1B;CKS2;CLIP3;CLN3;CLN6;CNPPD1;CPEB2;CPEB3;CREBL2;CRIPAK;CRK;CSK;CSNK2B;CTBP1;CXXC1;DAB2IP;DAPK3;DAXX;DDX11;DDX3X;DLG1;DNAJB2;DNAJB9;DNAJC10;DUSP19;DYRK1A;ECT2;EEFSEC;EID1;EIF2A;EIF2B5;EIF3E;EIF4E;EIF4E2;EIF4E3;EIF5;EIF5A2;ENG;EREG;ERN1;FBXO4;FBXO5  
  
YW3;TYW5;UTP11L;UTP14C;UTP15;UTP23;WDR  
  
A5;NDUFA6;NDUFAF1;NDUFB1;NDUFB3;NDUFB5;NDUFS2;NDUFS4;NDUFS5;NIPSNAP1;NRM;OMA1;OPA1;PC;PLA2G4A;PMPCA;PIIF;PSEN2;RNF13;SDHD;SHMT2;SIRT1;SLC24A6;SLC25A1;SLC25A10;SLC25A11;SLC25A22;SLC25A24;SLC25A3;SLC25A32;SLC25A34;SLC25A36;SLC25A38;SLC25A40;SLC25A43;  
  
;SRSF10;SRSF11;SRSF3;SRSF6;SUGP1;TIA1;TRA2A;TRA2B;U2AF1;WBP4;XAB2;ZCCHC  
;SRSF10;SRSF11;SRSF3;SRSF6;SUGP1;TIA1;TRA2A;TRA2B;U2AF1;WBP4;XAB2;ZCCHC  
23;TIMM8B;TOMM20;TOMM40;TOMM5;TRAM1;TRNT1;VAMP7;ZFAND6;ZFYVE  
  
CYCS;CYHR1;DDX3X;DHFR1;DHRS1;DMPK;DTX2;EIF5A2;ERAL1;ERBB2IP;ERN1;FAM169A;FAM188A;FANCL;GCH1;GK;GMCL1;GPAM;GPAT2;GPD2;GRPEL2;GUF1;HIGD1A;HMGCL;HSD17B10;IDH2;IL41;IMMP1L;INTS2;IPO11;IPO13;IPO4;KMO;KPN3;L2HGDH;LEMDS3;LMNA;LMNB2;LRRK2;MAD2L1;MAPK81  
  
B;ARL15;ARL2;ARL4A;ARL5A;ARL5B;ARL8B;ASNA1;ATAD1;ATAD2;ATAD2B;ATAD3A;ATL2;ATP10D;ATP11B;ATP13C;ATP13A2;ATP13A3;ATP2B1;ATP2C1;ATP6AP1;ATP7A;ATP8A1;ATP8A2;ATP8B4;ATPBD4;ATRX;AURKC;BBS10;BBS12;BCR;BMPR1A;BMPR2;BRIP1;BTAF1;C10orf2;CAMK1;CAMK2D;CAMK4;CB1  
IAC6;HOOK1;HOOK2;IGBP1;KATNB1;KIAA0101;KIF11;KIF18A;KIF20B;KIF22;KIF23;KIF27;KIF2A;KIF3A;KIF5B;KIFC1;KIFC3;KPN2;KTN1;LMNA;LYST;MAP3K11;MAP6D1;MARK4;MID1P1;MKKS;NDE1;NEK7;NIN;NME7;OPA1;PEX1;PEX13;PEX14;PKD2;PLK151;PLK4;PPP1R12A;PPP4C;PRKCZ;RAB6A;RB1;RHOT1;F  
38L;TDP2;WEE  
  
M17A;TIMM23;TMEM66;TMEM70;TOMM40;WFI  
ILG4;DMAP1;DYRK2;ECT2;ERBB2IP;EXOC8;EXPH5;FCHO2;FGF7;FGFR1OP;FOPNL;GAS6;GCC2;GIPC1;GOLGA4;GOPC;GRIK5;GRPEL2;HDAC6;HDAC8;HGS;INPP5K;IPO11;IPO13;IPO4;JAK2;JUN;JUP;KATNB1;KIF5B;KLHL2;KPN2;KPN3;KPN5;LAMTOR3;LEPROT;LMNA;LRWD1;MARCH5;MDFIC;MDM2;MFF;MC  
2HGHD;LRRK2;MAPK8IP1;MARCH5;MCL1;MCU;MDH2;MFF;MFN1;MPV17;MSTO1;MTHFDL2;MTX2;MTX3;NDUFA1;NDUFA4;NDUFA5;NDUFA6;NDUFAF1;NDUFB1;NDUFB3;NDUFB5;NDUFS2;NDUFS4;NDUFS5;NIPSNAP1;OMA1;OPA1;PC;PGAM5;PLA2G4A;PMAIP1;PMPCA;PNLA7;PIIF;PPP1CC;PSEN2;RHO  
  
D1;MAP3K7;MAPK8;MBIP;MBTD1;MEN1;MIS18BP1;MLF1IP;MORF4L2;MSL2;MSL3;MUC1;MYSM1;NAA60;NOC2L;NR3C1;OIP5;PHF17;PKN1;PRDM5;PRMT1;RB1;RCBTB1;REST;RING1;RNF2;RNF40;RPS6KA4;RPS6KA5;RRP8;RUVBL2;RYBP;SETDB2;SIRT1;SIRT2;SMARCA1;SMARCA5;SMARCAD1;SMARCB1;SRE  
  
11C;ATP6V1G1;ATP8A1;BCAP29;BCAP31;BET1;BLZF1;BMPR1A;BUD13;C5orf30;CA12;CACNB4;CALCR1;CAMK1;CAMK4;CARD8;CCDC91;CCT6B;CD27;CD274;CDC37;CDC40;CDK1;CDK5R1;CEP290;CEP57;CHCHD4;CHERP;CHM;CHML;CHMP1A;CHMP1B;CHMP2A;CHMP2B;CLEC5A;CLEC6A;CLIP3;CLN3;CNR1;C  
;BIN1;BIRC2;BNIP1;BNIP2;BNIP3L;CASP3;CASP8;CCBL2;CCNH;CDC26;CDC27;CDC42EP2;CDK1;CDK2;CDK7;CDKN1B;CHFR;CHID1;CHN2;CISD2;CLN3;CLN5;CLN6;CNN3;CNOT2;CNOT3;CNOT6;CNOT6L;CNOT7;CNOT8;CNP;CNR1;COLQ;COMT;CRAT;CRBN;CRK;CROT;CST3;CTBS;CTSH;CUL2;CUL4B;CUL5;CYCS;D  
  
MPD1;SMPD4;SMPDL3A;SPTLC1;SRM;SULT1E  
CHD9;CRBN;DCTN2;DDX11;DDX3X;DDX41;DDX50;DDX54;DDX59;DHX30;DHX36;DHX40;DICER1;DNA2;DNAH6;DNAI2;DYNC2L1;DYNLRB1;DYNLT3;EEF1A1;EEFSEC;EIF5;ENTPD6;ERCC2;FANCM;FIGNL1;GBP3;GBP6;GFM2;GNA13;GNAI1;GNAO1;GNL1;GNL3;GTF2F2;GTF2H1;GTF2H4;GTPBP10;GTPBP2;GUF1  
CHD9;CRBN;DCP2;DCPS;DCTN2;DDX11;DDX3X;DDX41;DDX50;DDX54;DDX59;DHX30;DHX36;DHX40;DICER1;DNA2;DNAH6;DNAI2;DOLPP1;DYNC2L1;DYNLRB1;DYNLT3;EEF1A1;EEFSEC;EIF5;ENTPD6;ERCC2;FANCM;FIGNL1;GBP3;GBP6;GFM2;GNA13;GNAI1;GNAO1;GNL1;GNL3;GTF2F2;GTF2H1;GTF2H4;GTF  
ILG4;DMAP1;DYRK2;ECT2;ERBB2IP;EXOC8;EXPH5;FCHO2;FGF7;FGFR1OP;FOPNL;GAS6;GCC2;GIPC1;GOLGA4;GOPC;GRIK5;GRPEL2;HDAC6;HDAC8;HGS;INPP5K;IPO11;IPO13;IPO4;JAK2;JUN;JUP;KATNB1;KIF5B;KLHL2;KPN2;KPN3;KPN5;LAMTOR3;LEPROT;LMNA;LRWD1;MARCH5;MDFIC;MDM2;MFF;MC  
  
VS1;SGMS2;SLC27A1;SLC44A3;SMPD1;SMPD4;SMPDL3A;SPTLC1;SRM;SULT1A1;SULT1I  
RAC1;SERINC1;SGMS1;SGMS2;SLC27A1;SLC44A3;SPTLC1;SYN1;VAC1  
HD1;CHD5;CHD9;CRBN;DCP2;DCPS;DCTN2;DDX11;DDX3X;DDX41;DDX50;DDX54;DDX59;DHX30;DHX36;DHX40;DICER1;DNA2;DNAH6;DNAI2;DOLPP1;DYNC2L1;DYNLRB1;DYNLT3;EEF1A1;EEFSEC;EIF5;ENTPD6;ERCC2;FANCM;FIGNL1;GBP3;GBP6;GFM2;GNA13;GNAI1;GNAO1;GNL1;GNL3;GTF2F2;GTF2H1;C  
CHD9;CRBN;DCP2;DCPS;DCTN2;DDX11;DDX3X;DDX41;DDX50;DDX54;DDX59;DHX30;DHX36;DHX40;DICER1;DNA2;DNAH6;DNAI2;DOLPP1;DYNC2L1;DYNLRB1;DYNLT3;EEF1A1;EEFSEC;EIF5;ENTPD6;ERCC2;FANCM;FIGNL1;GBP3;GBP6;GFM2;GNA13;GNAI1;GNAO1;GNL1;GNL3;GTF2F2;GTF2H1;GTF2H4;GTF  
SME1;PTGS2;REST;SCAP;SCP2;SIRT1;SMEK1;SMEK2;SREBF1;STARD3;STRADA;SULT1A1;SULT1B1;WDTCT  
MAP3K2;MAPK6;MAPK8IP1;MAPK8IP2;MEF2A;MSH2;NBEA;NFATC1;PARK2;PAX6;PDE3B;PDJUM5;PIA2;PKN1;PLK151;PPP1CB;PPP1CC;PPP1R12A;PRDX3;PRKAG2;PRKCSH;PRKCZ;PTEN;RAB11FIP2;RB1CC1;RHEB;RNF138;RPS6KA3;RPS6KA4;RPTOR;SIRT1;SPAG16;SPAG9;SREBF1;STK11IP;TFPT;TGFB2;TICAN  
  
VBN;NSMCE2;NUDT16;ORC2;ORC3;ORC4;PHIP;PKD2;PKIA;PKN2;PLCB1;PLK4;PRCC;PSMA1;PSMA2;PSMA3;PSMA4;PSMA6;PSMA8;PSMB1;PSMB3;PSMC1;PSMC2;PSMC3;PSMC5;PSMC6;PSMD10;PSMD13;PSMD14;PSMD4;PSMD8;PSME1;PTEN;RAD17;RASSF1;RB1;RBBP8;RFC2;RFC3;RFC5;RFWD2;RINT1;RI



RPS6KA3;RPS6KA5;SPAG9;TAB1;TAB2;TAB3;TAOK1;TLR6;UBC;VEGFA;ZMYND11;ZNF622;ZNF67

4MP1L;KMO;L2HGDH;LRRK2;MAPK8IP1;MARCH5;MCL1;MCU;MDH2;MFF;MFN1;MPV17;MSTO1;MTHFD2L;MTX2;MTX3;NDUFA1;NDUFA4;NDUFA5;NDUFA6;NDUFAF1;NDUFB1;NDUFB3;NDUFB5;NDUFS2;NDUFS4;NDUFS5;NIPSNAP1;OMA1;OPA1;PC;PGAM5;PLA2G4A;PMAIP1;PMPCA;PNPLA7;PIIF;PPP1

RPS6KA3;RPS6KA5;SPAG9;TAB1;TAB2;TAB3;TAOK1;TLR6;UBC;VEGFA;ZMYND11;ZNF622;ZNF67

DLG4;ECT2;EPS15;FAS;FBXO5;FCHO1;FCHO2;FER;FERMT3;GCH1;GFPT1;GLS;GMNN;GNMT;GOPC;GRHPR;HDAC6;HLA-DMA;HMGB1;HMGCL;HNF1A;HPRT1;HSF4;IDE;IGHMBP2;IL1RAP;ILK;IMPDH2;INSIG1;JAK2;JMY;JUP;KCNA2;KCNA2B;KCTD11;KCTD12;KCTD18;KCTD2;KCTD3;KCTD6;KCTD9;KIF23;KPNA3;L

4;ARPP19;ARRB1;ASF1A;ASPM;ATAD1;ATG12;ATG4B;ATG4C;ATG5;ATG9A;ATL2;ATP10D;ATP11B;ATP11C;ATP2C1;ATP6V1G1;ATP7A;ATP8A1;ATP8A2;ATPAF2;ATXN7L3;AURKC;B3GNT2;BAG4;BAG6;BAIAP2;BAP1;BAZ1A;BBIP1;BBS10;BBS12;BBS7;BCAP31;BCLAF1;BCR;BET1;BIN1;BIRC2;BLOC1S2;BLZF1;BM

DLG4;ECT2;EPS15;FAS;FBXO5;FCHO1;FCHO2;FER;FERMT3;GCH1;GFPT1;GLS;GMNN;GNMT;GOPC;GRHPR;HDAC6;HLA-DMA;HMGB1;HMGCL;HNF1A;HPRT1;HSF4;IDE;IGHMBP2;IL1RAP;ILK;IMPDH2;INSIG1;JAK2;JMY;JUP;KCNA2;KCNA2B;KCTD11;KCTD12;KCTD18;KCTD2;KCTD3;KCTD6;KCTD9;KIF23;KPNA3;L

327B;RAB28;RAB2A;RAB2B;RAB33B;RAB37;RAB39B;RAB4A;RAB5A;RAB6A;RAB8B;RAB9B;RABL3;RALA;RAP1A;RAP1B;RAP2A;RAP2C;RASL11A;RHEB;RHOBTB3;RHOQ;RHOT1;RHOU;RIT1;RNGTT;RP2;RSG1;RTKN;SAR1A;SAR1B;SEPT10;SEPT14;SEPT7;SEPT9;SUCLG2;TRIM23;TUBA1B;TUBD1;TUBE1;TUBG1;TU

;SPAST;TBL1XR1;TOPORS;TTK;TUBG1;TUBG2;TUBGCP2;VRK1;WDR6

250;CNPPD1;CRY1;CSK;CST3;CSTA;CUL2;CUL4B;CUL5;DAB2IP;DAXX;DIAPH3;DIXDC1;DLG1;DLG4;DNAJC10;DOCK11;DUSP19;DZIP3;ECT2;EEF1A1;EID1;EIF4E2;ESR2;EXPH5;FANCL;FAS;FBXO5;FER;FGD2;FGD3;FGD4;GFR1OP;FIZ1;FMNL1;FMNL2;FXD7;FZD6;GCLM;GCSH;GDI1;GLRX3;GMNN;GOLGA4;GSTN  
IX;DDX41;DEK;DENND4A;DMTF1;DNA2;DNASE1L1;DNASE2;DOT1L;DR1;DRAP1;E2F4;E2F6;E2F7;EBF4;ELF2;ELK4;ERCC2;ESR2;FANCM;FOXH1;FOXN2;GABPA;GABPB1;GATAD2A;GEN1;GPBP1;GRHL1;GTF2B;GTF2E1;GTF2E2;GTF2F2;GZF1;H2AFV;H2AFZ;HDAC3;HDAC5;HDGFRP2;HDX;HELLS;HLF;HLTF;HMGB

1;MAF;MEF2A;MEN1;MIS18BP1;MKI67IP;MLF1IP;MMS22L;MSH2;MUC1;NBN;NDE1;NEDD4;NFATC1;NOL6;NSL1;NSMCE2;NUDC2;NUF2;NUP37;NUP85;OIP5;ORC2;ORC3;ORC4;PAX6;PDS5B;PES1;PHOX2A;PLCB1;PMF1;POLG2;POT1;PPP1CC;PPP1R12A;PPP2CB;PPP2R1A;PPP2R5A;PRPF4B;PSEN2;PSIP1;PI

2A;RAB27B;RAB28;RAB2A;RAB2B;RAB33B;RAB37;RAB39B;RAB4A;RAB5A;RAB6A;RAB8B;RAB9B;RABL3;RALA;RAP1A;RAP1B;RAP2A;RAP2C;RASL11A;RHEB;RHOBTB3;RHOQ;RHOT1;RHOU;RIT1;RNGTT;RP2;RSG1;RTKN;SAR1A;SAR1B;SEPT10;SEPT14;SEPT7;SEPT9;SUCLG2;TMEM173;TRIM23;TUBA1B;TUBD1  
2A;RAB27B;RAB28;RAB2A;RAB2B;RAB33B;RAB37;RAB39B;RAB4A;RAB5A;RAB6A;RAB8B;RAB9B;RABL3;RALA;RAP1A;RAP1B;RAP2A;RAP2C;RASL11A;RHEB;RHOBTB3;RHOQ;RHOT1;RHOU;RIT1;RNGTT;RP2;RSG1;RTKN;SAR1A;SAR1B;SEPT10;SEPT14;SEPT7;SEPT9;SUCLG2;TMEM173;TRIM23;TUBA1B;TUBD1

IFS2;NDUFS4;NDUFS5;NIPSNAP1;OMA1;OPA1;PC;PLA2G4A;PMPCA;PIIF;PSEN2;SDHD;SHMT2;SLC24A6;SLC25A1;SLC25A10;SLC25A11;SLC25A22;SLC25A24;SLC25A3;SLC25A32;SLC25A34;SLC25A36;SLC25A38;SLC25A40;SLC25A43;SLC25A46;SPNS1;TIMM17A;TIMM22;TIMM23;TIMM8B;TMEM70;UCP2;UC

CVRL1;ACY3;ADA;ADAM10;ADAM15;ADAM22;ADAMTS5;ADAMTS6;ADAP1;ADC;ADCK1;ADCK2;ADCK3;ADD3;ADI1;ADM2;ADORA1;ADRBK1;ADRM1;ADSSL1;AEBP1;AEBP2;AFF4;AGAP2;AGAP3;AGBL3;AGER;AGFG2;AGGF1;AGL;AGPAT5;AGPS;AHR;AIDA;AIFM3;AIM2;AIMP1;AIMP2;AK3;AKAP11;AKAP5;AK

M;GTF2F2;GTF2H1;GTF2H4;HLTF;IDE;IGHMBP2;KATNB1;KIF18A;KIF20B;LONP1;LONRF1;MNAT1;MSH2;NBN;PEX1;PMS1;POLQ;PPP2R4;PSMC1;PSMC2;PSMC5;PSMC6;RAD51B;RAD51C;RECQL;RECQL5;RFC3;RHOBTB3;RUVBL2;SKIV2L;SKIV2L2;SMARCA1;SMARCA5;SPAST;TOP1MT;UPF1;VPS4A;VPS4B;YTHI

VR2A;ACVRL1;ACY3;ADA;ADAM10;ADAM15;ADAM22;ADAMTS5;ADAMTS6;ADAP1;ADC;ADCK1;ADCK2;ADCK3;ADD3;ADI1;ADM2;ADORA1;ADRBK1;ADRM1;ADSSL1;AEBP1;AEBP2;AFF4;AGAP2;AGAP3;AGBL3;AGER;AGFG2;AGGF1;AGL;AGPAT5;AGPS;AHR;AIDA;AIFM3;AIM2;AIMP1;AIMP2;AK3;AKAP11;AK

PPM1B;PPM1G;PPP1CA;PPP1CB;PPP1CC;PPP1R15B;PPP1R3D;PPP2CB;PPP2R1A;PPP2R2A;PPP3CA;PPP3CB;PPP4C;PPP5C;PPP6C;PTEN;PTP4A1;PTPDC1;PTPN12;PTPN2;PTPN22;PTPN23;PTPN4;PTPN7;PTPRO;RNGTT;RPAP2;SACM1L;SGPP1;SMPD1;SMPD4;SMPDL3A;SSU72;SYNJ1;TDP2;TENC1;UBLCP1;VPS;

;PSEN2;PTCHD2;PTGDS;RAE1;RANGAP1;RECQL5;RNF13;SEC13;SIRT1;SLC22A18;SLC2A9;SREBF1;SUMO1;TMEM201;TMEM388;TMEM48;TMPO;TNKS2;TNPO1;TOR1A;TREX1;TSGA10;UBXN4;UNC50;WTAP;XPC

'12;IAH1;IMPA1;IMPAD1;INPP5D;INPP5K;LHPP;LIPE;LIPN;LYPLA1;LYPLAL1;MINPP1;MTMR2;MTMR6;MTMR7;MTMR9;MYSM1;N4BP2;NANP;NAPEPLD;NT5C3;NUDT16;PDE1B;PDE3B;PDE4A;PDE4D;PDE7A;PDP1;PGAM5;PGAP1;PGAP3;PIKFYVE;PLA2G15;PLA2G4A;PLCB1;PLCB2;PLCB3;PLCD3;PLCL1;PLCXD2

EF2A;MUC1;MYSM1;NCOA4;NCOA7;NFKB2;NFKBIB;NOC2L;NRIP1;PBXIP1;PEX14;PFDN5;PKN1;PLRG1;PMF1;PPP1R13L;PQBP1;PRPF6;PSIP1;PSMC3;PSMC5;RB1;RBBP8;RELB;RFAP;RIPK3;RXRB;RYBP;SCAI;SIRT1;SKIL;SLC30A9;SMARCB1;SP4;SS18;SUB1;TADA1;TAF12;TAF7;TAF9;TAF9B;TBL1XR1;TBPL1;TDG

UCA1B;HMGB1;JUN;LLGL1;LRRK2;MALT1;MAP2K2;MAPK8IP2;MMP15;MMP17;MMP24;PIK3CA;PLCB1;PLXNB2;PPP2R4;PRKAG2;PSMD14;PTPLAD1;RAB3GAP2;RABEP1;RANGAP1;RASA1;RCVRN;RGS1;RGS12;RGS18;RGS5;RIN1;RP2;RPS27L;SH3BP1;SIPA1;STRADA;SYDE2;TAB1;TBC1D10B;TBC1D12;TBC1D1  
L;NSMCE2;NUDCD2;NUF2;NUP37;NUP85;OIP5;ORC3;ORC4;PAX6;PDS5B;PHOX2A;PLCB1;PMF1;POT1;PPP1CC;PPP1R12A;PPP2CB;PPP2R1A;PPP2R5A;PSEN2;PSIP1;PURA;PURB;RAD17;RANGAP1;RB1;RFC2;RFC3;RFC5;RIF1;RING1;RNF2;RNF40;RRP8;RUVBL2;SEC13;SEPT7;SFR1;SGOL2;SIRT1;SKA2;SMA

IP1;GDI1;GIT1;GOPC;GPS1;GPS2;GPSM1;IQSEC2;JUN;KNDC1;LAMTOR3;LLGL1;LRRK2;MAP4K1;MAP4K3;MAP4K5;MCF2;MON2;P2RY12;PLCB1;PLEKHG3;PLXNB2;PTGIR;PTPLAD1;RAB3GAP2;RAB3IP;RABEP1;RALGPS2;RANGAP1;RAPGEF6;RASA1;RCBTB2;RGS1;RGS12;RGS18;RGS5;RIC8A;RIC8B;RIN1;RP2;RP

PTPN2;PTPN22;PTPN23;PTPN4;PTPN7;PTPRO;RNGTT;RPAP2;SACM1L;SGPP1;SSU72;SYNJ1;TENC1;UBLCP1;VPS2I

/DE2;TBC1D10B;TBC1D12;TBC1D13;TBC1D15;TBC1D22A;TBC1D23;TBC1D25;TBC1D4;TBC1D8B;TBCD;TSC2;USP

A1;ASTE1;ASTL;ATAD1;ATAD2;ATAD2B;ATAD3A;ATG4A;ATG4B;ATG4C;ATL2;ATP10D;ATP11B;ATP11C;ATP13A2;ATP13A3;ATP2B1;ATP2C1;ATP5C1;ATP5E;ATP5F1;ATP5I;ATP5L;ATP5O;ATP6AP1;ATP6V1G1;ATP7A;ATP8A1;ATP8A2;ATP8B4;ATRX;BAP1;BMP1;BRCC3;BRIP1;BTAF1;BTD;C10orf2;C11orf54;C1F

;FGD4;FNIP1;GDI1;GIT1;GOPC;GPS1;GPS2;GPSM1;GRPEL2;IQSEC2;JUN;KNDC1;LAMTOR3;LLGL1;LRRK2;MAP4K1;MAP4K3;MAP4K5;MCF2;MON2;P2RY12;PLCB1;PLEKHG3;PLXNB2;PTGIR;PTPLAD1;RAB3GAP2;RAB3IP;RABEP1;RALGPS2;RANGAP1;RAPGEF6;RASA1;RCBTB2;RGS1;RGS12;RGS18;RGS5;RIC8A;R

HHC2;ZDHHC20;ZDHHC21;ZDHHC

;PLOC3;POGLUT1;POMT2;PPAT;QPR7;RFNG;ST8SIA4;STT3B;TNKS2;TYMP;UGCG;UGGT2;UGT2B

ZNF563;ZNF671;ZNF69;ZNF773;ZNF78

4;ZNF563;ZNF671;ZNF69;ZNF773;ZNF78

2;ZNF544;ZNF563;ZNF671;ZNF69;ZNF773;ZNF78

F69;ZNF773;ZNF78

;ZNF544;ZNF563;ZNF671;ZNF69;ZNF773;ZNF78

671;ZNF69;ZNF773;ZNF78

;SIRT5;SLC25A17;SLC25A4;SUPT7L;TCEA3;TGF83;UQCC;WDR77;ZNF133;ZNF202;ZNF211;ZNF232;ZNF266;ZNF329;ZNF343;ZNF419;ZNF44;ZNF530;ZNF542;ZNF544;ZNF563;ZNF671;ZNF69;ZNF773;ZNF7

;SIRT5;SLC25A17;SLC25A4;SUPT7L;TCEA3;TGF83;UQCC;WDR77;ZNF133;ZNF202;ZNF211;ZNF232;ZNF266;ZNF329;ZNF343;ZNF419;ZNF44;ZNF530;ZNF542;ZNF544;ZNF563;ZNF671;ZNF69;ZNF773;ZNF7

IP7L;TCEA3;TGF83;WDR77;ZNF133;ZNF202;ZNF211;ZNF232;ZNF266;ZNF329;ZNF343;ZNF419;ZNF44;ZNF530;ZNF542;ZNF544;ZNF563;ZNF671;ZNF69;ZNF773;ZNF7

;OVGP1;PDE6B;PEX11B;PMS2P1;POLR1C;PPIE;PPIH;RBF4;RDH16;RPP38;RSAD1;SDCCAG3;SIRT5;SLC25A17;SLC25A4;STMN1;SUPT7L;TCEA3;TGF83;UQCC;WDR77;ZNF133;ZNF185;ZNF202;ZNF211;ZNF232;ZNF266;ZNF329;ZNF343;ZNF419;ZNF44;ZNF530;ZNF542;ZNF544;ZNF563;ZNF671;ZNF69;ZNF773;ZNF

1;SIRT5;SLC25A17;SLC25A4;SUPT7L;TCEA3;TGF83;WDR77;ZNF133;ZNF202;ZNF211;ZNF232;ZNF266;ZNF329;ZNF343;ZNF419;ZNF44;ZNF530;ZNF542;ZNF544;ZNF563;ZNF671;ZNF69;ZNF773;ZNF7



NF542;ZNF544;ZNF563;ZNF671;ZNF69;ZNF773;ZNF78

IGT1;TRAPPC3;UX

PS25;RPS27A;RPS3;RPS4X;RPS5;RPS6;RPS8;RPSA;SKP1;SNRPD2;SNRPD3;SNUPN;STX8;SUCLG1;SUGT1;TRAPPC3;UQCRFS1;UXT;VDA

8;RPSA;SSBP1;SUGT1;UXT;ZNR

8;RPSA;SSBP1;SUGT1;UXT;ZNR

RPS18;RPS19;RPS20;RPS21;RPS23;RPS25;RPS27A;RPS3;RPS4X;RPS5;RPS6;RPS8;RPSA;SKP1;SNRPD2;SNRPD3;SNUPN;SRPRB;SSBP1;STX8;SUCLG1;SUGT1;TICAM2;TOMM6;TRAPPC3;UQCRFS1;UXT;VDAC3;ZNR  
RPS19;RPS20;RPS21;RPS23;RPS25;RPS27A;RPS3;RPS4X;RPS5;RPS6;RPS8;RPSA;SKP1;SNRPD2;SNRPD3;SNUPN;SRPRB;SSBP1;STX8;SUCLG1;SUGT1;TICAM2;TOMM6;TRAPPC3;UQCRFS1;UXT;VDAC3;ZNR

RPSA;SNRPD3;SRPRB;SSBP1;TRNAU1AP;UXT;ZGLP1;ZNR  
PS8;RPSA;SNRPD2;SNRPD3;SNUPN;SRPRB;TRNAU1AP;UXT;ZGLP1;ZNR

PS25;RPS27A;RPS3;RPS4X;RPS5;RPS6;RPS8;RPSA;SKP1;SNRPD2;SNRPD3;SNUPN;SRPRB;SSBP1;STX8;SUCLG1;SUGT1;TICAM2;TOMM6;TRAPPC3;UQCRFS1;UXT;VDA  
RPSA;SNRPD3;SRPRB;SSBP1;TRNAU1AP;UXT;ZGLP1;ZNR

PSA;SNRPD2;SNRPD3;SNUPN;SSBP1;UXT;ZGLP1;ZNR  
UXT;ZGLP1;ZNR  
L37;RPL37A;RPL4;RPL5;RPL7A;RPS11;RPS12;RPS13;RPS14;RPS16;RPS18;RPS19;RPS20;RPS21;RPS23;RPS25;RPS27A;RPS3;RPS4X;RPS5;RPS6;RPS8;RPSA;SKP1;SNRPD2;SNRPD3;SNUPN;SRPRB;SSBP1;STX8;SUCLG1;SUGT1;TICAM2;TOMM6;TRAPPC3;TRNAU1AP;UQCRFS1;UXT;VDA  
3A;RPL14;RPL19;RPL22;RPL23A;RPL24;RPL27A;RPL3;RPL32;RPL35A;RPL36;RPL37;RPL37A;RPL4;RPL5;RPL7A;RPS11;RPS12;RPS13;RPS14;RPS16;RPS18;RPS19;RPS20;RPS21;RPS23;RPS25;RPS27A;RPS3;RPS4X;RPS5;RPS6;RPS8;RPSA;SKP1;SNRPD2;SNRPD3;SNUPN;SPAG7;SRPRB;SSBP1;STX8;SUCLG1;SUGT1;T

TX8;SUGT1;TOMM6;U

S3;RPS4X;RPS5;RPS6;RPS8;RPSA;SNRPD2;SNRPD3;SNUPN;SRPRB;SSBP1;UXT;ZGLP1;ZNR

PL35A;RPL36;RPL37;RPL37A;RPL4;RPL5;RPL7A;RPS11;RPS12;RPS13;RPS14;RPS16;RPS18;RPS19;RPS20;RPS21;RPS23;RPS25;RPS27A;RPS3;RPS4X;RPS5;RPS6;RPS8;RPSA;SKP1;SNRPD2;SNRPD3;SNUPN;SPAG7;SRPRB;SSBP1;STX8;SUCLG1;SUGT1;THYN1;TICAM2;TOMM6;TRAPPC3;TRNAU1AP;UQCRFS1;UXT;  
3A;RPL14;RPL19;RPL22;RPL23A;RPL24;RPL27A;RPL3;RPL32;RPL35A;RPL36;RPL37;RPL37A;RPL4;RPL5;RPL7A;RPS11;RPS12;RPS13;RPS14;RPS16;RPS18;RPS19;RPS20;RPS21;RPS23;RPS25;RPS27A;RPS3;RPS4X;RPS5;RPS6;RPS8;RPSA;SKP1;SNRPD2;SNRPD3;SNUPN;SPAG7;SRPRB;SSBP1;STX8;SUCLG1;SUGT1;T  
7A;RPS3;RPS4X;RPS5;RPS6;RPS8;RPSA;SNRPD2;SNRPD3;SNUPN;SRPRB;SSBP1;UXT;ZGLP1;ZNR  
PL35A;RPL36;RPL37;RPL37A;RPL4;RPL5;RPL7A;RPS11;RPS12;RPS13;RPS14;RPS16;RPS18;RPS19;RPS20;RPS21;RPS23;RPS25;RPS27A;RPS3;RPS4X;RPS5;RPS6;RPS8;RPSA;SKP1;SNRPD2;SNRPD3;SNUPN;SPAG7;SRPRB;SSBP1;STX8;SUCLG1;SUGT1;THYN1;TICAM2;TOMM6;TRAPPC3;TRNAU1AP;UQCRFS1;UXT;  
;RPS6;RPS8;RPSA;SNRPD2;SNRPD3;SNUPN;SRPRB;SSBP1;UXT;ZGLP1;ZNR

V6;U  
X;RPS5;RPS6;RPS8;RPSA;SNRPD2;SNRPD3;SNUPN;SRPRB;SSBP1;UXT;ZGLP1;ZNR  
5;RPS6;RPS8;RPSA;SNRPD3;SRPRB;SSBP1;TRNAU1AP;UXT;ZGLP1;ZNR

S3;RPS4X;RPS5;RPS6;RPS8;RPSA;SNRPD2;SNRPD3;SNUPN;SRPRB;SSBP1;UXT;ZGLP1;ZNR  
;RPS8;RPSA;SNRPD3;SRPRB;SSBP1;TRNAU1AP;UXT;ZGLP1;ZNR

5;RPS6;RPS8;RPSA;SNRPD3;SRPRB;SSBP1;TRNAU1AP;UXT;ZGLP1;ZNR

PS25;RPS27A;RPS3;RPS4X;RPS5;RPS6;RPS8;RPSA;SNRPD2;SNRPD3;SNUPN;SRPRB;SSBP1;UXT;ZGLP1;ZNR

RPS25;RPS27A;RPS3;RPS4X;RPS5;RPS6;RPS8;RPSA;SKP1;SNRPD2;SNRPD3;SNUPN;SRPRB;SSBP1;TOMM6;TRNAU1AP;USP42;UXT;ZGLP1;ZNR

PS11;RPS12;RPS13;RPS14;RPS16;RPS18;RPS19;RPS20;RPS21;RPS23;RPS25;RPS27A;RPS3;RPS4X;RPS5;RPS6;RPS8;RPSA;SKP1;SNRPD2;SNRPD3;SNUPN;SRPRB;SSBP1;SUCLG1;TOMM6;TRNAU1AP;UQCRFS1;USP42;UXT;ZGLP1;ZNRI

PS23;RPS25;RPS27A;RPS3;RPS4X;RPS5;RPS6;RPS8;RPSA;SKP1;SNRPD2;SNRPD3;SNUPN;SRPRB;SSBP1;TOMM6;TRNAU1AP;USP42;UXT;ZGLP1;ZNRI  
RPL5;RPL7A;RPS11;RPS12;RPS13;RPS14;RPS16;RPS18;RPS19;RPS20;RPS21;RPS23;RPS25;RPS27A;RPS3;RPS4X;RPS5;RPS6;RPS8;RPSA;SKP1;SNRPD2;SNRPD3;SNUPN;SRPRB;SSBP1;SUCLG1;TOMM6;TRNAU1AP;UQCRFS1;USP42;UXT;ZGLP1;ZNRI  
;RPS14;RPS16;RPS18;RPS19;RPS20;RPS21;RPS23;RPS25;RPS27A;RPS3;RPS4X;RPS5;RPS6;RPS8;RPSA;SKP1;SNRPD2;SNRPD3;SNUPN;SRPRB;SSBP1;SUCLG1;TOMM6;TRNAU1AP;USP42;UXT;ZGLP1;ZNRI  
2;RPS13;RPS14;RPS16;RPS18;RPS19;RPS20;RPS21;RPS23;RPS25;RPS27A;RPS3;RPS4X;RPS5;RPS6;RPS8;RPSA;SKP1;SNRPD2;SNRPD3;SNUPN;SRPRB;SSBP1;SUCLG1;TOMM6;TRNAU1AP;USP42;UXT;ZGLP1;ZNRI

3A;RPL14;RPL19;RPL22;RPL23A;RPL24;RPL27A;RPL3;RPL32;RPL35A;RPL36;RPL37;RPL37A;RPL4;RPL5;RPL7A;RPS11;RPS12;RPS13;RPS14;RPS16;RPS18;RPS19;RPS20;RPS21;RPS23;RPS25;RPS27A;RPS3;RPS4X;RPS5;RPS6;RPS8;RPSA;SKP1;SNRPD2;SNRPD3;SNUPN;SPAG7;SRPRB;SSBP1;STX8;SUCLG1;SUGT1;T  
3A;RPL14;RPL19;RPL22;RPL23A;RPL24;RPL27A;RPL3;RPL32;RPL35A;RPL36;RPL37;RPL37A;RPL4;RPL5;RPL7A;RPS11;RPS12;RPS13;RPS14;RPS16;RPS18;RPS19;RPS20;RPS21;RPS23;RPS25;RPS27A;RPS3;RPS4X;RPS5;RPS6;RPS8;RPSA;SKP1;SNRPD2;SNRPD3;SNUPN;SPAG7;SRPRB;SSBP1;STX8;SUCLG1;SUGT1;T

;RPL23A;RPL24;RPL27A;RPL3;RPL32;RPL35A;RPL36;RPL37;RPL37A;RPL4;RPL5;RPL7A;RPS11;RPS12;RPS13;RPS14;RPS16;RPS18;RPS19;RPS20;RPS21;RPS23;RPS25;RPS27A;RPS3;RPS4X;RPS5;RPS6;RPS8;RPSA;SKP1;SNRPD2;SNRPD3;SNUPN;SRPRB;SSBP1;STX8;SUCLG1;SUGT1;TICAM2;TOMM6;TRAPPC3;TRN

11B;FFAR2;FFAR3;FGF13;FLOT1;FOXO3;FPR1;FPR2;FYB;GNAQ;GPR141;GPR17;GPR89A;GPR97;GPSM2;GRIP2;GSK3B;GTSE1;HCAR2;HCAR3;HEY1;HIF1A;HMGCR;HPSE;IFNAR1;IFNGR2;IGSF6;IL10RB;IL13RA1;IL18RAP;IL1B;IL1R1;IL1RN;INHBB;IQGAP1;IRAK3;ITGAD;KCNE1;KCNH7;KCNJ15;KCNS1;KLF6;KPNA1;  
11B;FFAR2;FFAR3;FGF13;FLOT1;FOXO3;FPR1;FPR2;FYB;GNAQ;GPR141;GPR17;GPR89A;GPR97;GPSM2;GRIP2;GSK3B;GTSE1;HCAR2;HCAR3;HEY1;HIF1A;HMGCR;HPSE;IFNAR1;IFNGR2;IGSF6;IL10RB;IL13RA1;IL18RAP;IL1B;IL1R1;IL1RN;INHBB;IQGAP1;IRAK3;ITGAD;KCNE1;KCNH7;KCNJ15;KCNS1;KLF6;KPNA1;  
3;FPR1;FPR2;FYB;GNAQ;GPR141;GPR17;GPR89A;GPR97;GPSM2;GSK3B;GTSE1;HCAR3;HEY1;HIF1A;HMGCR;HPSE;IFNAR1;IFNGR2;IGSF6;IL10RB;IL13RA1;IL18RAP;IL1B;IL1R1;IL1RN;INHBB;IQGAP1;IRAK3;ITGAD;KLF6;KPNA1;KPNA4;LILRB3;LIMD1;LITAF;LYN;MCTP2;MLLT11;MYO5A;NCOA1;NCOA2;NEDD9;N  
11B;FFAR2;FFAR3;FGF13;FLOT1;FOXO3;FPR1;FPR2;FYB;GNAQ;GPR141;GPR17;GPR89A;GPR97;GPSM2;GRIP2;GSK3B;GTSE1;HCAR2;HCAR3;HEY1;HIF1A;HMGCR;HPSE;IFNAR1;IFNGR2;IGSF6;IL10RB;IL13RA1;IL18RAP;IL1B;IL1R1;IL1RN;INHBB;INPP5A;IQGAP1;IRAK3;ITGAD;KCNH7;KCNJ15;KCNS1;KLF6;KPNA1  
AD7;CR1;CSRNP1;CST7;CUL3;CXCR1;CYBB;CYTH4;DGAT2;DNAJB11;DNAJC3;DOCK1;DOCK4;DOK4;EBP;EDEM2;EMR3;ENTPD1;EXT1;F5;FCGR1A;FCGR1B;FCGR3B;FFAR2;FFAR3;FGF13;FLOT1;FOXO3;FPR1;FPR2;FYB;GNAQ;GPR141;GPR17;GPR89A;GPR97;GPSM2;GSK3B;GTSE1;H3F3B;HAS1;HCAR3;HEY1;HIF1



'A;RASGRP4;RHOH;SBNO2;SEC24D;SECTM1;SIT1;SOC3;SOD2;SRPK1;SRPK2;STK3;TARBP2;TLR2;TLR4;TLR5;TNFSF14;TREM1;TREM2;WNT10B;ZFP36;ZFP36  
1;FCGR1A;FCGR1B;FFAR2;FFAR3;FGF13;FLOT1;FOXO3;FPR1;FPR2;FYB;GNAQ;GPR141;GPR17;GPR89A;GPR97;GPM2;GSK3B;GTSE1;HAS1;HCAR3;HEY1;HIF1A;HMGR;HP;HPSE;IFNAR1;IFNGR2;IGSF6;IL10RB;IL13RA1;IL18RAP;IL1B;IL1R1;IL1RN;INHBB;IQGAP1;IRAK3;ITGAD;KLF6;KPNA1;KPNA4;LILRB3;LIMD  
CNTNAP3;COQ4;CR1;CXCR1;CYBB;CYTH4;DGAT2;DMXL2;DNAJC3;DOCK1;DOCK4;EBP;EDEM2;ELOVL5;EMR3;ENTPD1;EXT1;F5;FAM120A;FCGR1A;FCGR1B;FCGR1C;FCGR2A;FCGR3B;FFAR2;FFAR3;FGF13;FLOT1;FOXO3;FPR1;FPR2;GABARAPL1;GALNT14;GDE1;GIMAP1;GLIPR2;GNAQ;GOLGA7B;GPR141;GPR  
GAT2;DMXL2;DNAJB11;DNAJC3;DOCK1;DOCK4;DOK4;DPYD;E2F3;ELOVL5;ETS2;EVI5;EXT1;F5;FCGR1A;FCGR1B;FCGR1C;FCGR2A;FCGR3B;FGF13;FLOT1;FOXO3;FPR1;FYB;GABARAPL1;GCM1;GNAQ;GPM2;GSK3B;H3F3B;HEY1;HIF1A;HIVEP1;HMGR;HP;HPSE;IDH1;IL10RB;IL13RA1;IL1B;IL1R1;IL1R2;IL1RN;IN

4;SIT1;SLC12A6;SLC22A1;SLC22A14;SLC22A4;SLC8A1;SNTG2;ST3GAL5;STX3;TGM3;TLR2;TLR4;TM9SF2;TNFRSF1A;TRPM6;TRPV5;VAMI  
;RHOH;SDCBP;SECTM1;SLC8A1;SOC3;SOS2;SRPK1;SRPK2;STK3;TEAD3;TIAM2;TLR2;TLR4;TNFRSF1A;TNFSF14;TREM1;TRIB1;UBR2;WLS;ZAK;ZFP  
84;GPR97;GPM2;GRIP2;GSK3B;HAS1;HCAR2;HCAR3;IFNAR1;IFNGR2;IGSF6;IL10RB;IL13RA1;IL1R1;IL1R2;IL1RN;IQGAP1;ITGAD;ITM2B;ITPRIP;KAL1;KCNE1;KCNH7;KCNJ15;KCNS1;KIAA0319;LAMP2;LILRB3;LITAF;LRRC4;LYN;LYVE1;MARCKS;MCMBP;MME;MYO10;NAIP;NCF4;NEDD9;NFE2L2;NPTN;OSM;OX

84;GPR97;GRIP2;GSK3B;HAS1;HCAR2;HCAR3;IFNAR1;IFNGR2;IGSF6;IL10RB;IL13RA1;IL1R1;IL1R2;IL1RN;IQGAP1;ITGAD;ITM2B;ITPRIP;KAL1;KCNE1;KCNH7;KCNJ15;KCNS1;KIAA0319;LAMP2;LILRB3;LITAF;LRRC4;LYN;LYVE1;MARCKS;MCMBP;MME;MYO10;NAIP;NCF4;NFE2L2;NPTN;OSM;OXER1;PAK2;PDZD  
AMP2;LILRB3;LIMD1;LYN;LYVE1;MRV1;NAIP;NFE2;NFE2L2;NPEPPS;ORM1;ORM2;OSM;PAK2;PAPSS2;PDK3;PELI2;PGLYRP1;PIAS1;PLAU;PLD1;POLD3;PPAP2B;PROK2;PVRL2;RAB27A;RTN3;SBNO2;SCARF1;SDCBP;SLC12A6;SLC8A1;SOC3;SOD2;SRPK1;SRPK2;STK3;TARBP2;TLR2;TLR4;TLR5;TNFRSF1A;TI

IAS1;PLAU;PPAP2B;PROK2;PTPRE;PVRL2;RASGRP4;RHOH;RNF111;RS1;SBNO2;SCARF1;SDCBP;SECTM1;SH3GLB1;SOC3;SOS2;STK3;TARBP2;TIAM2;TLR2;TLR4;TLR5;TNFRSF1A;TNFSF14;TRIB1;UBR2;UIMC1;WAC;WLS;WNT10B;ZAK;ZFP;  
;CDH2;CDK14;CDK4;CDK5;CENPV;CEP63;CHRNA10;CLDN6;CLEC1A;CLMN;CNTNAP3;COMMD7;CSRNP1;CTBP2;CUL3;CXCR1;CYBB;CYTH4;DGAT2;DMRT2;DNAH14;DNAJB11;DNAJC3;DOCK1;DOCK4;DOK4;DUSP13;E2F3;EBP;EMR3;ENTPD1;EVI5;EXT1;F5;FAM65B;FCGR1A;FCGR1B;FFAR2;FFAR3;FGF13;FLO  
VNT10  
VLS;EMR3;ENTPD1;EXT1;FCGR1A;FCGR1B;FCGR1C;FCGR2A;FCGR3B;FFAR2;FFAR3;FLOT1;FPR1;FPR2;GALNT14;GDE1;GIMAP1;GNAQ;GPR141;GPR17;GPR84;GPR89A;GPR97;GSK3B;HAS1;HCAR2;HCAR3;HMGR;HPSE;IFNAR1;IFNGR2;IGSF6;IL10RB;IL13RA1;IL18RAP;IL1R1;IL1R2;IQGAP1;ITGAD;ITM2B;KCNE  
RE;RAB31;RNF111;SLC8A1;SOC3;SOD2;STX3;TARBP2;TLR2;TLR4;TNFRSF1A;TRIB1;UBR2;WNT10

H;RNF111;RS1;SDCBP;SECTM1;SH3GLB1;SOC3;SOS2;STK3;TG;TIAM2;TLR2;TLR4;TLR5;TNFRSF1A;TNFSF14;TRIB1;UBR2;VAMP3;WLS;WNT10B;ZAF

;LYN;MLLT11;NEDD9;NPTN;NUP50;NUPL1;OXER1;PAK2;PDZD3;PELI2;PIAS1;PPAP2B;PROK2;PTPRE;RASGRP4;REPS2;RNF111;RS1;SOC3;SOS2;STK3;TIAM2;TLE4;TLR2;TLR4;TNFRSF1A;TRIB1;WLS;WNT10

H;RNF111;RS1;SDCBP;SECTM1;SH3GLB1;SOC3;SOS2;STK3;TG;TIAM2;TLR2;TLR4;TLR5;TNFRSF1A;TNFSF14;TRIB1;UBR2;WAC;WLS;WNT10B;ZAF

NA10;CIR1;CLEC1A;CLMN;CNTNAP3;COMMD7;CR1;CSRNP1;CST7;CTBP2;CUL3;CXCR1;CYTH4;DGAT2;DMRT2;DNAJB11;DNAJC3;DOCK1;DOCK4;DOK4;E2F3;EMR3;ENTPD1;ETS2;EXT1;F5;FCGR1A;FCGR1B;FFAR2;FFAR3;FGF13;FLI1;FLOT1;FOXO3;FPR1;FPR2;FYB;GCM1;GNAQ;GPR141;GPR17;GPR89A;GPR  
CDC42EP3;CDH2;CDK14;CDK19;CDK4;CDK5;CEP63;CHRNA10;CIR1;CLDN6;CLEC1A;CLMN;CNGA4;CNTNAP3;COMMD7;CR1;CSRNP1;CTBP2;CUL3;CXCR1;CYBB;CYTH4;DCTPP1;DGAT2;DHRS12;DHRS13;DHRS7;DHRSX;DMRT2;DMXL2;DNAH14;DNAJB11;DNAJC3;DOCK1;DOCK4;DOK4;DPYD;E2F3;EDEM2;E  
2;STK3;TIAM2;TLR2;TLR4;TLR5;TNFRSF1A;TNFSF14;TRIB1;UBR2;WLS;WNT10B;ZAF

3R1C;FCGR2A;FCGR3B;FFAR2;FFAR3;FLOT1;FPR1;FPR2;GALNT14;GDE1;GIMAP1;GPR141;GPR17;GPR84;GPR89A;GPR97;HAS1;HCAR2;HCAR3;HMGR;IFNAR1;IFNGR2;IGSF6;IL10RB;IL13RA1;IL18RAP;IL1R1;IL1R2;ITGAD;ITM2B;KCNE1;KCNH7;KCNJ15;KCNS1;KIAA0319;KPNA1;LAMP2;LBR;LILRA6;LILRB3;LRR  
O;MYO5A;NFE2;NFE2L2;NPTN;OSBPL11;OSM;PAPSS2;PDE4B;PDK3;PIF1;PLAU;POLD3;PPAP2B;PROK2;RAB27A;RAPGEF2;SBF2;SH3GLB1;SLC22A1;SLC22A4;SLC8A1;SNTA1;SOD2;STX12;SYN2;TG;TLR2;TLR4;TMX4;TNFSF14;TREM1;TRIM9;USP3;WNT10B;ZFP36;ZFP36

DCBP;SEC24D;SH3GLB1;SMAGP;ST3GAL4;ST3GAL5;ST6GALNAC2;STX12;STX6;TNFRSF1A;TOR1AIP2;VAMP3;WDFY3;WI

14;CDK4;CDK5;CENPV;CEP63;CIR1;CLMN;COQ4;CST7;CUL3;CYBB;DCTPP1;DGAT2;DMXL2;DNAH14;DNAJB11;DNAJC3;DOCK1;DOCK4;DPYD;DUSP13;EBP;ECHDC3;EDEM2;ELOVL5;ENO3;EVI5;EXT1;F5;FAM120A;FAM65B;FCGR1A;FCGR1B;FGF13;FLOT1;FOXO3;FPR1;FRMD4B;FRY;FYB;GABARAPL1;GALNT14

;MBOAT2;ME2;MME;MYO5A;NCF4;NCOA1;NCOA2;NMNAT2;NPL;NT5C2;NUDT5;NUP50;NUPL1;OLAH;OPLAH;OSBPL1A;OXER1;PANK2;PAPSS2;PDE4B;PDK3;PDZD3;PFKFB4;PGS1;PLB1;PLBD1;PLD1;PNP;PNPLA1;PPAP2B;PPP1R3B;RAB1A;RAB31;SCARF1;SH3GLB1;SLC22A1;SLC22A4;SOD2;SQRL;ST3GAL4;SAR3;FLOT1;FPR1;FPR2;GALNT14;GDE1;GIMAP1;GPR141;GPR17;GPR84;GPR89A;GPR97;HAS1;HCAR2;HCAR3;HMGCR;JFNAR1;JFNGR2;JGSF6;JL10RB;JL13RA1;JL18RAP;JL1R1;JL1R2;ITGAD;ITM2B;KCNE1;KCNH7;KCNJ15;KCNK1;KIAA0319;KPNA1;LAMP2;LBR;LILRA6;LILRB3;LRRC4;LYN;LYVE1;MANSC1;MBOAT2

IK3;PDZD3;PELI2;PFKFB4;PGS1;PLB1;PLBD1;PLD1;PNP;PPAP2B;PPP4R1;PROK2;PTPRE;RAB1A;RAB31;RHOH;SDCBP;SH3GLB1;SOCS3;SRPK1;SRPK2;STK3;TARBP2;TGM3;TLR2;TLR4;TMEM132D;TNFRSF1A;TPX2;TRIB1;Z/0;MYO5A;NCOA1;NFE2L2;NPEPPS;NPTN;NUP50;NUPL1;OPLAH;PAK2;PAPSS2;PDCD7;PDE4B;PDK3;PDZD3;PHB;PIAS1;PLAU;PLD1;PLXNC1;PNP;PROK2;PTPRE;RAB31;RNF111;SDCBP;SLC22A1;SLC8A1;SOCS3;SOD2;SOS2;STX3;TARBP2;TLR2;TLR4;TNFRSF1A;TRIB1;TRPM6;UBR2;WNT10A

DE4B;PDK3;PDZD3;PELI2;PFKFB4;PGS1;PLB1;PLBD1;PLD1;PNP;PPAP2B;PPP4R1;PROK2;PTPRE;RAB1A;RAB31;RHOH;SDCBP;SH3GLB1;SOCS3;SRPK1;SRPK2;STK3;TARBP2;TGM3;TLR2;TLR4;TMEM132D;TNFRSF1A;TPX2;TRIB1;Z/0

CD59;CDA;CDC123;CDC42EP3;CDH2;CDK14;CDK4;CDK5;CENPV;CEP63;CHRNA10;CLDN6;CLEC1A;CLMN;CNGA4;CNTNAP3;COMMD7;CR1;CSRNP1;CTBP2;CUL3;CXCR1;CYBB;CYTH4;DGAT2;DMRTC2;DNAH14;DNAJB11;DNAJC3;DOCK1;DOCK4;DOK4;DUSP13;E2F3;EBP;ELMOD3;EMR3;ENTPD1;ETS2;EVI5;EXT1

JDT5;NUP50;NUPL1;OLAH;OPLAH;OSBPL1A;OXER1;PANK2;PAPSS2;PDE4B;PDK3;PDZD3;PFKFB4;PGS1;PLB1;PLBD1;PLD1;PNP;PPAP2B;RAB1A;RAB31;SCARF1;SLC22A1;SLC22A4;SOD2;SQRL;ST3GAL4;TG;TGM3;TIAM2;TMLHE;TNFRSF1A

7;CR1;CSRNP1;CST7;CTBP2;CUL3;CXCR1;CYTH4;DGAT2;DMRTC2;DNAJB11;DNAJC3;DOCK1;DOCK4;DOK4;E2F3;EMR3;ETS2;EXT1;FCGR1A;FCGR1B;FFAR2;FFAR3;FGF13;FLOT1;FOXO3;FPR1;FPR2;FYB;GCM1;GNAQ;GPR141;GPR17;GPR89A;GPR97;GPM2;GSK3B;GTSE1;HAS1;HCAR2;HCAR3;HEY1;HIF1A;HIVE

IA1;SOCS3;SOD2;TARBP2;TLR2;TLR4;TNFRSF1A;TRIB1;UBR2;WNT10

YN;MLLT11;MYO10;NCOA1;NCOA2;NFE2;NFE2L2;NFIL3;NFYA;NPTN;NRD1;OSBPL11;OSM;PAK2;PDCCD7;PELI2;PHB;PIAS1;PICALM;PNP;PPAP2B;PROK2;PVRL2;RAB27A;RANBP1;RASGRP4;RNF111;SCARF1;SDCBP;SECTM1;SH3GLB1;SLC8A1;SOCS3;SOD2;SRPK1;SRPK2;STK3;SYNGR3;TARBP2;TEAD3;TLR2;TLR4

.2;NFYA;NPTN;NRD1;OSM;PAK2;PDCD7;PELI2;PHB;PIAS1;PICALM;PNP;PPAP2B;PROK2;PVRL2;RAB27A;RANBP1;RASGRP4;RNF111;SCARF1;SDCBP;SECTM1;SH3GLB1;SLC8A1;SOCS3;SOD2;SRPK1;SRPK2;STK3;TARBP2;TEAD3;TLR2;TLR4;TLR5;TNFRSF1A;TNFSF14;TPX2;TRIB1;TSHZ3;UIMC1;VAMP3;WAC;WLS;

2;CAPN13;CAPN8;CASP4;CASP5;CBS;CCDC125;CCNJL;CCR1;CCR2;CCT4;CD177;CD300LD;CD55;CD59;CDA;CDC123;CDC42EP3;CDH2;CDK14;CDK4;CDK5;CEACAM4;CENPV;CEP63;CHRNA10;CIR1;CLDN6;CLEC1A;CLMN;CNTNAP3;COQ4;CR1;CSRNP1;CST7;CTBP2;CUL3;CXCR1;CYBB;CYTH4;DCTPP1;DGAT2;DM2;CAPN13;CAPN8;CASP4;CASP5;CBS;CCDC125;CCNJL;CCR1;CCR2;CCT4;CD177;CD300LD;CD55;CD59;CDA;CDC123;CDC42EP3;CDH2;CDK14;CDK4;CDK5;CEACAM4;CENPV;CEP63;CHRNA10;CIR1;CLDN6;CLEC1A;CLMN;CNTNAP3;COQ4;CR1;CSRNP1;CST7;CTBP2;CUL3;CXCR1;CYBB;CYTH4;DCTPP1;DGAT2;DM

LM;PLD1;RAB27A;RAB31;RTN3;SBF2;SDCBP;SEC24D;SH3GLB1;SLC15A4;SMAGP;SOD2;SQRL;ST3GAL4;ST3GAL5;ST6GALNAC2;STX12;STX6;TIMM44;TLR4;TM9SF2;TNFRSF1A;TOR1AIP2;VAMP3;W



'C,VIL1,WASF  
'C,VIL1,WASF

'C,VIL

L4;TFPI;TMEM40;TNFSF4;TPM1;TREML1;TSPAN33;TSPAN9;VSIG2;VV

SS1;RAB6B;RGS6;RHOBTB1;SDC4;SELP;SERPINE1;SH3TC2;SLC6A4;SLC8A3;SPARC;SPOCD1;STON2;SYTL4;TFPI;TGFB11;TNFSF4;TPM1;TREML1;TSC22D1;VEGFC;VIL1;VWF;WASF3;ZNF4

PR;SELP;SERPINE1;SH3BGRL2;SLC6A4;SLC8A3;SPARC;STON2;SYTL4;TGFB11;TNFSF4;TOM1L1;TPM1;TREML1;VEGFC;VIL1;VWF;WASI

43TC2;SLC6A4;SLC8A3;SMOX;SPARC;STON2;SYTL4;TFPI;TOM1L1;TPM1;TREML1;VEGFC;VV





KAR2B;PROS1;PTGES;PTGS1;PVALB;RAB6B;RGS6;RHOTB1;SDC4;SDPR;SELP;SERPINE1;SH3TC2;SLC6A4;SLC8A3;SMOX;SPARC;STON2;SYTL4;TFPI;TGFB111;TOM1L1;TPM1;TREML1;TSC22D1;TUBA8;TUBB1;VEGFC;VIL1;VWF;WAS

IYK;NRGN;PAR3;PCSK6;PDE5A;PDGFA;PDGFRA;PDLIM1;PF4;PF4V1;PGRMC1;PLOD2;PLXNB3;PPBP;PRKAR2B;PROS1;PTCRA;PTGES;PTGS1;PVALB;RAB6B;RBPMS2;RGS6;RHOTB1;SDC4;SDPR;SELP;SERPINE1;SH3BGRL2;SLC6A4;SLC8A3;SPARC;STON2;SYTL4;TGFB111;TNFSF4;TOM1L1;TPM1;TREML1;TRIM4





;PRDX6;PTPRN;RAB31L1;RAG1;RAP1GAP;RHAG;RILP;RIOK3;RNF10;SELENBP1;SFRP2;SGIP1;SHARPIN;SIAH2;SIM2;SLC2A4;SLC4A1;SNCA;SOX6;SPDYC;SPTA1;STRADB;STX2;TAL1;TESC;TFDP1;TGM2;TMCC2;TMOD1;TNS1;TUBB2B;UBA52;UBB;UBXN6;WNT9A;XK;YB

!;KLC3;LGALS3;MARCH2;MBNL3;MYL4;NEDD4L;NT5M;NUDT4;OAZ1;ODC1;PBX1;PDE3A;PLEK2;PLVAP;PPM1A;PRDX5;PRDX6;RAP1GAP;RBM38;RHOV;RILP;RNF10;RPL3L;SELENBP1;SFRP2;SGIP1;SHARPIN;SIAH2;SLC25A37;SLC25A39;SLC2A4;SLC4A1;SNCA;SPDYC;SPTA1;ST6GALNAC4;STRADB;STX2;TESC;TGI

1;STX2;TAL1;TESC;TGM2;TMOD1;TRIM10;TUBB2B;UBA52;UBB;UTS2R;WNT9A;YB

I2;KEL;KLF1;KRT1;LGALS3;LYL1;MBNL3;MEF2B;MXI1;MYL4;NEDD4L;NUDT4;ODC1;OSBP2;PBX1;PDE3A;PLEK2;POLL;PPM1A;PRDX5;PRDX6;PTPRF;PTPRN;RAG1;RAP1GAP;RBM38;RHAG;RHOV;RILP;RIOK3;RNF10;RPL3L;RUNDC3A;SESN3;SFRP2;SGIP1;SHARPIN;SIAH2;SIM2;SLC14A1;SLC25A37;SLC2A4;SLC38/

^M2;HPS1;|GF2BP2;ITLN1;KANK2;KCNH2;KEL;KLC3;KLF1;KRT1;LGALS3;LYL1;MARCH2;MBNL3;MEF2B;MKRN1;MRC2;MXI1;MYL4;NEDD4L;NFIX;NT5M;NUDT4;OSBP2;PBX1;PDE3A;PLEK2;PLVAP;POLL;POLR1D;PPM1A;PRDX5;PRDX6;PTPRF;PTPRN;RAB31L1;RAG1;RAP1GAP;RBM38;RHAG;RHOV;RILP;RIOK3;RI

IAG;RHCE;RHOV;RILP;SEC14L4;SELENBP1;SFRP2;SGIP1;SHISA4;SHISA7;SLC14A1;SLC25A37;SLC25A39;SLC2A4;SLC38A5;SLC4A1;SLC6A19;SLC6A8;SLC6A9;SNCA;SPTA1;ST6GALNAC4;STX2;TESC;TGM2;TMCS;TMCC2;TMEM158;TMEM56;TMEM98;TMOD1;TMPS59;TSPAN5;TSPAN7;TSPO2;TUBB2A;TUBB2B;P;RBM38;RHOV;RILP;RPL3L;SELENBP1;SGIP1;SHARPIN;SIAH2;SLC25A37;SLC25A39;SLC2A4;SLC4A1;SNCA;SPTA1;ST6GALNAC4;STRADB;STX2;TGM2;TMEM98;TMOD1;TSPO2;UBA52;UBB;UTS2R;VTI1B;YB

331;ZNF841;ZNF850;ZNF88

341;ZNF85

ZNF548;ZNF585B;ZNF831;ZNF841;ZNF850;ZNF88  
ZNF548;ZNF585B;ZNF831;ZNF841;ZNF850;ZNF88

1;ZNF850;ZNF88

2A5;SLC5A9;SPRY1;SWAP70;SYNPO;TCL1A;TNFRSF13C;TSPAN1  
2A5;SLC5A9;SPRY1;SWAP70;SYNPO;TNFRSF13C;TSPAN1

IGLEC6;SLC15A2;SLC2A5;SLC5A9;SLC9A7;SYBU;TNFRSF13C;TSPAN13;TSPAN  
L1L3;SIGLEC6;SLC15A2;SLC2A5;SLC5A9;SLC9A7;SYBU;TNFRSF13C;TSPAN13;TSPAN

X5;PARM1;PAWR;PCDH9;PIK3C2B;PMEPA1;PPAPDC1B;PRICKLE1;PTPRK;QSOX2;RASGRP3;SCN4A;SEL1L3;SEMA3G;SIGLEC6;SLC15A2;SLC2A5;SLC5A9;SLC9A7;SNX22;SPRY1;SWAP70;SYBU;SYNPO;TNFRSF13C;TSPAN13;TSPAN

;QSOX2;RASGRP3;SCN4A;SEL1L3;SIGLEC6;SLC15A2;SLC2A5;SLC5A9;SLC9A7;SYBU;TNFRSF13C;TSPAN13;TSPAN

:1;LARGE;MACROD2;MAP2;MICAL3;MMP11;MS4A1;MYBPC2;NETO1;NXPH4;OLFML2A;OSBPL10;P2RX5;PAWR;PAX5;PCDH9;PEG10;PIK3C2B;PKIG;PLEKHG1;PMEPA1;PNOC;PRICKLE1;PTPRK;QRSL1;QSOX2;RAPGEF5;RASGRP3;SCN4A;SEMA3G;SIGLEC6;SLC15A2;SLC2A5;SLC5A9;SLC9A7;SNX22;SOBP;SPRY1;

11;MS4A1;MYBPC2;NETO1;NXPH4;OLFML2A;P2RX5;PAWR;PAX5;PCDH9;PEG10;PIK3C2B;PKIG;PLEKHG1;PMEPA1;PNOC;PRICKLE1;PTPRK;QRSL1;QSOX2;RAPGEF5;RASGRP3;SIGLEC6;SLC15A2;SLC2A5;SLC5A9;SLC9A7;SNX22;SPRY1;STAG3;STAP1;STRBP;SWAP70;SYNPO;TCF4;TCL1A;TNFRSF11



P;SWAP70;TCF4;TCL1A;TNFRSF13

TCL1A;TNFRSF13

ICKLE1;PTPRK;RAPGEF5;RASGRP3;SLC15A2;SOBP;SPRY1;STAP1;STRBP;SWAP70;TNFRSF13































EF1A;RCAN2;RGS9;S1PR5;SH2D2A;SH3RF2;SLAMF7;SMAD7;SYTL2;TBX21;TIGIT;USP28;VIT;WNT1;YPEL1;YWHAQ;ZFYVE28;ZNF6

EF1A;RCAN2;RGS9;S1PR5;SH2D1B;SH2D2A;SH3RF2;SLAMF7;SMAD7;SYTL2;TBX21;TIGIT;USP28;VIT;WNT1;YPEL1;YWHAQ;ZFYVE28;ZNF6

R3;PODN;PPP2R2B;PTCH1;PTGDR;PYHIN1;RAB7L1;RASGEF1A;RCAN2;RGS9;S1PR5;SGCD;SH2D1B;SH2D2A;SLAMF7;SLC1A7;SMAD7;SPON2;SYTL2;TBX21;TIGIT;USP28;VIT;WNT1;YPEL1;YWHAQ;ZFYVE



TM4SF19;VANGL1;WNT1;XPNPEF

PON2;TBX21;USP28;WNT1;YPEL1;YWHAQ;ZFYVE2

L;RASGEF1A;RCAN2;RGS9;S1PR5;SH2D1B;SH2D2A;SH3RF2;SLAMF7;SMAD7;SYTL2;TBX21;TIGIT;USP28;VIT;WNT1;YPEL1;YWHAQ;ZFYVE28;ZNF61

;PCDH1;PDGFRB;PIK3R3;PODN;PPP2R2B;PTCH1;PTGDR;PYHIN1;RAB7L1;RASGEF1A;RCAN2;RGS9;S1PR5;SGCD;SH2D1B;SH2D2A;SLAMF7;SLC1A7;SMAD7;SPON2;SYTL2;TBX21;TIGIT;USP28;VANGL1;VIT;WNT1;YPEL1;YWHAQ;ZFYVE

S1PR5;SCD5;SGCD;SLAMF6;SLAMF7;SLC1A7;SMAD7;SYT11;SYTL2;TIGIT;TM4SF19;VANGL1;WNT1;XPNPEP2;ZFYVE;



RF1;TIPIN;TNKS;TTC37;UHRF

PO;TSPYL5;UNC119;USF1;USP47;VGF;WRN;YAP

BL1;RGS14;RSPH1;SDCCAG8;SEPT2;SGOL1;SIRT7;SMAD6;SMC1B;SMC3;SPICE1;TERF1;TIPIN;TNKS;TUBA1A;TUBA4A;UBD;UBE2C;UBE2S;USP4

PAT;NPM2;NR2C2;NUP107;NUP160;ORCS;PBRM1;PDS5A;PIWIL2;PLK3;PPP2CA;PRIM2;PRKCE;PRNP;PSMB10;PSMB8;PSMB9;PSMD5;PSME2;PSRC1;PTPN11;RAD50;RAD52;RANBP2;RARA;RBL1;RGS14;RGS2;RHOB;RSPH1;SDCCAG8;SEPT2;SEPT5;SERTAD1;SFN;SGOL1;SIRT7;SMAD6;SMC1B;SMC3;SPHK1;SPI

SMB8;PSMB9;PSMD5;PSME2;PSRC1;PTPN11;RAD50;RAD52;RANBP2;RBL1;RGS14;RHOB;RSPH1;SDCCAG8;SEPT2;SGOL1;SIRT7;SMAD6;SMC1B;SMC3;SPICE1;TERF1;THBS1;TIPIN;TNKS;TUBA1A;TUBA4A;UBD;UBE2C;UBE2S;UHRF2;USP4

SMC3;SPHK1;SPICE1;TERF1;TIPIN;TNKS;TUBA1A;TUBA4A;UBD;UBE2C;UBE2S;USP4

LINT1;CNTN2;COL16A1;COL18A1;COL23A1;COL4A2;COL9A1;CPE;CRTAP;CSPG5;CTNNBIP1;DAAM2;DARS;DCTN3;DOX1;DEDD2;DGAT1;DISP1;DNAH9;DNAJC2;DNER;DNM1L;DRD3;DSTN;DYNC2H1;EI24;EIF4EBP1;ELANE;ELF3;ELFN1;EML4;EPA4;ERCC4;ERCC6;ESRRB;EXOSC4;FADD;FANCC;FANCD2;FAT1;FB

TIPIN;TRIM32;UBD;UBE2C;UHRF2;USP4

D5;ATE1;ATL1;ATMIN;ATP2A1;ATP2B2;ATP6V0A2;ATP6V0B;ATP6V1G2;ATPAF1;ATR;ATXN10;ATXN3;AURKAIP1;AZU1;B3GNT8;B9D2;BAG5;BAK1;BANP;BARD1;BAX;BCAN;BCAS1;BCKDK;BCL3;BEX4;BFAR;BIN3;C10orf137;C19orf40;CA7;CABP1;CAMK2B;CAMKK1;CAND1;CAPN11;CARD9;CASK;CASP7;CBX8;

LINT1;CNTN2;COL16A1;COL18A1;COL23A1;COL4A2;COL9A1;CPE;CRTAP;CSPG5;CTNNBIP1;DAAM2;DARS;DCTN3;DOX1;DEDD2;DGAT1;DISP1;DNAH9;DNAJC2;DNER;DNM1L;DRD3;DSTN;DYNC2H1;EI24;EIF4EBP1;ELANE;ELF3;ELFN1;EML4;EPHA4;ERCC4;ERCC6;ESRRB;EXOSC4;FADD;FANCC;FANCD2;FAT1;FB

6V1G2;ATPAF1;ATR;ATXN3;AURKAIP1;AZU1;B3GNT8;B9D2;BAK1;BANP;BARD1;BAX;BCAN;BCKDK;BCL3;BEX4;BFAR;BIN3;C10orf137;C19orf40;CABP1;CAMK2B;CAMKK1;CAND1;CAPN11;CASK;CASP7;CBX8;CCDC15;CCDC19;CCIN;CCNJ;CDC14B;CDC23;CDK5;CDK6;CDKN2D;CDYL;CENPC1;CENPJ;CEP128;CEP

6V1G2;ATPAF1;ATR;ATXN3;AURKAIP1;AZU1;B3GNT8;B9D2;BAK1;BANP;BARD1;BAX;BCAN;BCKDK;BCL3;BEX4;BFAR;BIN3;C10orf137;C19orf40;CABP1;CAMK2B;CAMKK1;CAND1;CAPN11;CASK;CASP7;CBX8;CCDC15;CCDC19;CCIN;CCNJ;CDC14B;CDC23;CDK5;CDK6;CDKN2D;CDYL;CENPC1;CENPJ;CEP128;CEP

DN;DDX1;DEDD2;DIP2C;DNAJC2;DNAJC8;DNNTIP1;DPPA4;DUSP1;EDNRB;EI24;EIF2S1;EIF4EBP1;ELF3;ELP2;EPM2A;ERCC4;ERCC6;ERRF1;ESRRA;ESRRB;ETV3L;EXOSC4;FANCC;FANCD2;FAT1;FBXO32;FBXO43;FGF18;FHOD3;FKBPL;FKTN;FOS;FOXD4L1;FOXO1;FSTL3;FUBP3;GADD45G;GATAD1;GLIS2;GNPTAB;

.CNB1;KCNQ5;KCTD4;KIFAP3;LAMA3;LIMA1;MAP1LC3A;MTDH;MYO1B;NCBP1;NCBP2;NIP7;NPM2;NRXN1;NUFIP1;NUP107;PANX2;PCBD2;PDSS2;PPP2CA;PRKE;PRNP;PSMD5;PSRC1;PVRL4;PYCARD;RAB34;RAD52;RBMX;RPGRI1;SEPT2;SET;SHPRH;SHQ1;SHROOM1;SMAD6;SPICE1;SRR;SRSF9;SSH3;TAF1  
SSI;ATAD5;ATE1;ATL1;ATMIN;ATP2A1;ATP2B2;ATP6V0A2;ATP6V0B;ATP6V1G2;ATPAF1;ATR;ATXN10;ATXN3;AURKAIP1;AZU1;B3GNT8;B9D2;BAG5;BAK1;BANP;BARD1;BAX;BCAN;BCAS1;BCKDK;BCL3;BEX4;BFAR;BIN3;C10orf137;C19orf40;CA7;CABP1;CAMK2B;CAMKK1;CAND1;CAPN11;CARD9;CASK;CASP;

TXN3;AURKAIP1;AZU1;B3GNT8;B9D2;BAK1;BANP;BARD1;BAX;BCAN;BCKDK;BCL3;BEX4;BFAR;C10orf137;C19orf40;CABP1;CAMK2B;CAMKK1;CAND1;CAPN11;CASK;CASP7;CBX8;CCDC19;CCNJ;CDC14B;CDC23;CDK5;CDK6;CDKN2D;CDYL;CENPC1;CERS1;CERS4;CERS6;CHIC2;CHST1;CITED4;CLASP2;CLIC5;CLIN

);PSMB8;PSMB9;PSMD5;PSME2;PYCARD;RASSF6;RHOB;SAV1;SET;SFN;SHQ1;SMAD6;SPHK1;SPI1;TERF1;THBS1;TNFRSF12A;TNFSF8;TRIM32;TSC22D3;TSPO;UBD;UNC5C;USP47;WNK3;WNT11;WRN;YAP1;ZC3H8;ZNF2  
TXN3;AURKAIP1;AZU1;B3GNT8;B9D2;BAK1;BANP;BARD1;BAX;BCAN;BCKDK;BCL3;BEX4;BFAR;C10orf137;C19orf40;CABP1;CAMK2B;CAMKK1;CAND1;CAPN11;CASK;CASP7;CBX8;CCDC19;CCNJ;CDC14B;CDC23;CDK5;CDK6;CDKN2D;CDYL;CENPC1;CERS1;CERS4;CERS6;CHIC2;CHST1;CITED4;CLASP2;CLIC5;CLIN

1B8;PSMB9;PSMD5;PSME2;PYCARD;RASSF6;RHOB;SAV1;SET;SFN;SHQ1;SMAD6;SPHK1;SPI1;TERF1;THBS1;TNFRSF12A;TNFSF8;TRIM32;TSC22D3;TSPO;UBD;UNC5C;USP47;WNK3;WNT11;WRN;YAP1;ZC3H8;ZNF2  
PSMB10;PSMB8;PSMB9;PSMD5;PSME2;PYCARD;RASSF6;RHOB;SAV1;SET;SFN;SHQ1;SMAD6;SPHK1;SPI1;TERF1;THBS1;TNFRSF12A;TNFSF8;TRIM32;TSC22D3;TSPO;UBD;UNC5C;USP47;WNK3;WNT11;WRN;YAP1;ZC3H8;ZNF205;ZNF7

;ASPHD1;ASS1;ATAD5;ATE1;ATG2B;ATL1;ATMIN;ATP2A1;ATP2B2;ATP6V0A2;ATP6V0B;ATP6V1G2;ATR;ATXN10;ATXN3;AURKAIP1;AZU1;B3GNT8;B9D2;BAG5;BAI3;BAIAP3;BAK1;BANP;BARD1;BAX;BCAN;BCKDK;BCL3;BFAR;BIN3;BMPR1B;C10orf137;C19orf40;CA7;CABP1;CACNB2;CAMK2B;CAMKK1;CAND1

2;WNK

;B9D2;BAG5;BAK1;BAX;BCAN;BCKDK;BCL3;BFAR;CA7;CABP1;CAMK2B;CAMKK1;CAPN11;CASK;CASP7;CCDC19;CCIN;CD151;CDC23;CDK5;CDK6;CDKN2D;CENPC1;CENPJ;CEP128;CEP192;CEP76;CERS1;CERS4;CERS6;CHIC2;CHST1;CLASP2;CLIC5;CLINT1;CLOCK;CLTB;CNIH2;COL16A1;COL18A1;COL23A1;COL4

2;HES1;HEXIM2;HHATL;HMBOX1;HMGA2;HOXB6;HTRA3;HUS1;IHH;KCNH3;KLF12;L3MBTL3;LEFTY1;LRPPRC;LUM;MAPK10;MAPK3;MED17;MESP2;MET;MKL2;MLLT10;MLX;MORF4L1;MRE11A;MSTN;MTDH;NAA15;NANOG;NANOS3;NCBP1;NCBP2;NFIB;NFKBID;NPAT;NPM2;NR1H3;NR2C2;NUFIP1;PAX9;PI

GTF2H3;HAS3;HDAC2;HES1;HEXIM2;HHATL;HMBOX1;HMGA2;HOXB6;HPN;HTRA3;HUS1;IHH;KCNH3;KLF12;L3MBTL3;LEFTY1;LRPPRC;LUM;MAPK10;MAPK3;MED17;MESP2;MET;MKL2;MLLT10;MLX;MORF4L1;MRE11A;MSTN;MTDH;NAA15;NANOG;NANOS3;NCBP1;NCBP2;NFIB;NFKBID;NPAT;NPM2;NR1









IMK1D;CAMK2G;CAP1;CAP2B;CASC3;CASP9;CCL3;CCNK;CD14;CD163;CD1D;CD209;CD300C;CD44;CD86;CD97;CDC42;CELA1;CFL1;CFLAR;CHCHD6;CHEK1;CHRN2;CITED2;CLEC4C;CNN2;COLEC12;COTL1;CREBBP;CRKL;CRTAM;CSF1;CSF1R;CSF3R;CSNK1D;CTDSP2;CTNNA1;CTS;CTS;CXCR2;DAB2;DAP;DAP1  
BIA;NHEJ1;NME1;NOTCH1;NOTCH2;PAF1;PAFAH1B1;PIK3CD;PKNOX1;PLCG2;PLEK;POU2F2;PRKDC;PSEN1;PTK2B;RCOR1;RNF41;SBDS;SEMA4A;SGPL1;SH2B3;SOD1;SOX4;SPTB;SRF;STAT5A;STAT5B;STAT6;STK4;SYK;TACC3;TFE3;TGFB1;THOC5;TIRAP;WDR  
PRCP;PRKACA;PRKCB;PRKCD;PSAP;PSEN1;PTPN1;PTPN6;PTPRJ;RAC1;RAC2;RAF1;RCOR1;RHOA;SELL;SELPLG;SERPINA1;SH2B3;SIN3A;SIRPA;SLC7A5;SLC7A7;SOD1;SRC;SRF;SYK;TGFB1;TLN1;VAV1;VCL;WA  
2;PLEK;PRCP;PRKACA;PRKCB;PRKCD;PSAP;PTPN1;PTPN6;PTPRJ;RAC1;RAC2;RAF1;RCOR1;RHOA;SELL;SELPLG;SERPINA1;SH2B3;SIN3A;SIRPA;SLC7A5;SLC7A7;SOD1;SRC;SRF;SYK;TGFB1;TLN1;VAV1;VCL;WA  
LAT2;LCP1;LCP2;LEFTY2;LILRB2;MAPK14;MERTK;MYB;MYH9;MYO1F;NCOR1;NCSN;NDRG1;NOD2;P2RX1;PAK1;PECAM1;PFDN1;PIK3CD;PIK3R5;PKNOX1;PLCG2;PLEK;POU2F2;PRAM1;PREX1;PRKCB;PRKCD;PRKDC;PRMT5;PSAP;PSEN1;PTK2B;PTPN1;PTPN6;PTPRJ;RAC1;RAC2;RAF1;R  
PRCP;PRKACA;PRKCB;PRKCD;PSAP;PTPN1;PTPN6;PTPRJ;RAC1;RAC2;RAF1;RCOR1;RHOA;SELL;SELPLG;SERPINA1;SH2B3;SIN3A;SIRPA;SLC7A5;SLC7A7;SOD1;SRC;SRF;SYK;TGFB1;TLN1;VAV1;VCL;WA  
XP3;FZD1;GCC1;GDI2;GLMN;GNAS;GOSR1;HCLS1;IL23A;IL4R;IMMP2L1;JAK3;KDELRL1;KIF13A;KPNB1;LCP1;LCP2;LILRB1;LIN7B;LMTK2;LRP1;LTBP2;MAPK14;MFN2;MRPL45;MX2;MYH9;MYO7A;NAPA;NFKBIA;NLR4;NLRP3;NOD2;NOTCH1;NOTCH2;NUP35;NUP98;NUP2L;NXT1;OPTN;OS9;PACS1;PAF  
1;NFAM1;NFKBIA;NHEJ1;NME1;NOTCH1;NOTCH2;PAF1;PAFAH1B1;PIK3CD;PKNOX1;PLCG2;PLEK;POU2F2;PRKDC;PSEN1;PTK2B;RCOR1;RNF41;SBDS;SEMA4A;SGPL1;SH2B3;SOD1;SOX4;SPTB;SRF;STAT5A;STAT5B;STAT6;STK4;SYK;TACC3;TFE3;TGFB1;THOC5;TIRAP;TNFSF13;WDR  
;GOLIM4;GRB2;GSN;HAX1;HCK;HEXB;HIP1;HLA-B;HLA-C;HLA-DPA1;HLA-E;HSPAS;IGF2R;ITSN1;KIF1B;LAMP1;LEFTY2;LTBP2;MARCH8;MMP14;MSN;MYH11;MYH9;MYO7A;MYOF;NCF2;NCSN;NEU1;PACS1;PECAM1;POMC;PPT1;PRG2;RAB11FIP1;RAB11FIP4;RAB23;RAB35;RAB3D;RAB43;RAB5B;RAB5C;RAE  
R;IL6R;IRAK2;IRS2;ITGB2;JAK1;JAK3;KIR3DL1;KLF13;KLR4;KLRK1;LAT2;LCP2;LILRA1;LILRB1;LILRB2;MAFB;MAP2K1;MAP2K3;MAPK14;MERTK;MPP1;MSN;MYB;MYD88;MYO1F;NFAM1;NFKB1;NFKBIA;NLR4;NME1;NOD2;NOTCH1;PACS1;PAF1;PAK1;PCBP2;PIK3CD;PLCG2;POLR3F;PRAM1;PRKCB;PRKD2;PSI  
UC19;DNAJCS;DNM2;DSCR3;EHD1;EHD3;EIF2D;ERC1;ERGC1;F13A1;FAM160A2;FAM21A;FAM21C;FBXO22;FGF9;FIS1;FOXP3;FURIN;FZD1;GAB2;GCC1;GCK;GLMN;GLUL;GNAS;GOLGAS;GOSR1;HCK;HCLS1;HGSNAT;HMGN3;HMOX1;HSPA5;IFT43;IFT46;IL23A;IL4R;IMMP2L1;IRS2;JAK3;JPH4;KCNAS;KCNK3;KCI  
TSA;DAB2;DAG1;DENND1A;DNAJ14;DNAJ19;DNM2;DNMT3B;EHD1;EHD3;EIF2D;EPB41L3;ERC1;FAM160A2;FBN2;FGF9;FIS1;FLCN;FOXP3;FTO;FZD1;GCC1;GDI2;GLMN;GM2A;GNAS;GOSR1;HCLS1;HDLBP;HEXB;HNRNPK;IL23A;IL4R;IMMP2L1;IRS2;JAK3;KATNA1;KDELRL1;KIF13A;KPNB1;LCP1;LCP2;LILRB1;LIL  
IALGAP2;RAP1GAP2;RGS10;RGS16;RGS3;RIN2;RIN3;SIPA1L1;SIPA1L2;SMAP2;SPRY2;SRGAP2;STARDB;STK4;TBC1D1;TBC1D14;TBC1D19;TBC1D2;TBC1D20;TBC1D2B;TBC1D5;TBC1D8;TBC1D9;TIMP

LBP1;RALGAP2;RHOA;RRAS2;RSU1;SEMA4D;SIPA1L1;SMAP2;SPRY2;SQSTM1;SRC;SRGAP2;TBC1D2;TIMP2;TRIM67;ULK1;VAV1;WASF2;YWHAB  
7;CHD8;CHEK1;CITED2;CLPX;COL15A1;COL5A2;COL8A2;COQ3;COX17;CPOX;CPSF7;CPT2;CREBBP;CRNKL1;CS;CSNK2A1;CTDP1;CTDSP2;CTNNB1;CTSA;CTS;CTS;D;DAP3;DAPK2;DEDD;DNAJ14;DNMT3B;DSCC1;DUT;EGR1;ELF4;ELL;ELL3;EMG1;EP300;ESR1;EXOSC1;EXOSC3;EXOSC8;EYA3;F13  
AX1;HCK;HEXB;HFE;HIP1;HLA-B;HLA-C;HLA-DPA1;HLA-E;HSPAS;IGF2R;ITSN1;KIAA0319L;KIF1B;LAMP1;LEFTY2;MARCH8;MMP14;MYH11;MYO7A;MYOF;NBR1;NCF2;NCSN;NEU1;PACS1;PDCD6;PECAM1;POMC;PPT1;PRG2;PSEN1;PTPN1;RAB11FIP1;RAB11FIP4;RAB23;RAB35;RAB3D;RAB43;RAB5B;RAB5C;R

NK2A1;CTNNA1;CTNNB1;CTS;CTS;CXCR2;CXCR7;DAB2;DAP;DAP3;DAPK1;DAPK2;DBNL;DEDD;DNAJ6;DNAJCS;DNM2;DPF2;DYNLL1;DYNLL2;EGR1;ELMO1;ELMO2;EP300;ESR1;FAIM;FAM129B;FAM162A;FIG4;FIS1;FLCN;FLT3;FOSL2;FURIN;FUS;GBA;GHITM;GIGYF2;GLO1;GNB1;GNRH1;GRN;GSN;H1FO;H  
NK2A1;CTNNA1;CTNNB1;CTS;CTS;CXCR2;CXCR7;DAB2;DAP;DAP3;DAPK1;DAPK2;DBNL;DEDD;DNAJ6;DNAJCS;DNM2;DPF2;DYNLL1;DYNLL2;EGR1;ELMO1;ELMO2;EP300;ESR1;FAIM;FAM129B;FAM162A;FIG4;FIS1;FLCN;FLT3;FOSL2;FURIN;FUS;GBA;GHITM;GIGYF2;GLO1;GNB1;GNRH1;GRN;GSN;H1FO;H  
;HEK1;CITED2;CLPX;COL15A1;COL5A2;COL8A2;COQ3;CPSF7;CPT2;CREBBP;CRNKL1;CS;CSNK2A1;CTDP1;CTDSP2;CTNNB1;CTSA;CTS;CTS;D;DAP3;DAPK2;DEDD;DNAJ14;DNMT3B;DSCC1;DUT;EGR1;ELF4;ELL;ELL3;EMG1;EP300;ESR1;EXOSC1;EXOSC3;EXOSC8;EYA3;F13A1;FANCF;FDX1;FLT3;F

;CUX1;DAB2;DAG1;DENND3;DNAJ19;DNAJCS;DNM2;DOCK2;DSCR3;EHD1;EHD3;EIF2D;EPB41L3;ERC1;ERGC1;F13A1;FAM160A2;FAM21A;FAM21C;FBXO22;FGF9;FIS1;FLCN;FOXP3;FURIN;FZD1;GAB2;GCC1;GCK;GLMN;GLUL;GNAS;GOLGAS;GOSR1;HCK;HCLS1;HGSNAT;HMGN3;HMOX1;HSPA5;IFT43;IFT4  
;ACNG8;CAMK1D;CANT1;CARM1;CASP9;CBL;CBY1;CCL3;CD14;CD1D;CD3D;CD44;CD86;CDC42;CDH1;CFLAR;CHD8;CHEK1;CHRN2;CHST11;CITED2;CLTA;CLTC;COLEC12;CREBBP;CRTAM;CSF1;CSF1R;CSNK1D;CSNK2A1;CTNNA1;CTNNB1;CTNND1;DAB2;DAG1;DAPK1;DBNL;DISC1;DNMBP;DOCK2;DVL3;EGR1;  
FN2;MYB;MYOF;P2RX1;PAK1;PECAM1;PHF21A;PIK3R5;PLAUR;PLCG2;PLEK;PRCP;PRKACA;PRKCB;PRKCD;PSAP;PTPN1;PTPN6;PTPRJ;RAC1;RAC2;RAF1;RCOR1;RHOA;SELL;SELPLG;SERPINA1;SH2B3;SIN3A;SIRPA;SLC7A5;SLC7A7;SOD1;SRC;SRF;SYK;TGFB1;TLN1;VAV1;VCL;WA  
XP3;FZD1;GCC1;GDI2;GLMN;GNAS;GOSR1;HCLS1;IL23A;IL4R;IMMP2L1;JAK3;KDELRL1;KIF13A;KPNB1;LCP1;LCP2;LILRB1;LIN7B;LMTK2;LRP1;LTBP2;MAPK14;MFN2;MRPL45;MX2;MYH9;MYO7A;NAPA;NFKBIA;NLR4;NLRP3;NOD2;NOTCH1;NOTCH2;NUP35;NUP98;NUP2L;NXT1;OPTN;OS9;PACS1;PAF  
PX;COL15A1;COL5A2;COL8A2;COQ3;CPSF7;CPT2;CREBBP;CRNKL1;CS;CSNK2A1;CTDP1;CTDSP2;CTNNB1;CTSA;CTS;CTS;D;DAP3;DAPK2;DEDD;DNAJ14;DNMT3B;DSCC1;DUT;EGR1;ELF4;ELL;ELL3;EMG1;EP300;ESR1;EXOSC1;EXOSC3;EXOSC8;EYA3;FANCF;FDX1;FLT3;FOXJ2;FOXN3;FOXO4;FC

21A;PIK3R5;PLAUR;PLCG2;PLEK;PRCP;PRKACA;PRKCB;PRKCD;PSAP;PTPN1;PTPN6;PTPRJ;RAC1;RAC2;RAF1;RCOR1;RHOA;SELL;SELPLG;SERPINA1;SH2B3;SIN3A;SIRPA;SLC7A5;SLC7A7;SOD1;SRC;SRF;STAT5A;STAT5B;SYK;TGFB1;TLN1;UTS2;VAV1;VCL;WAS;WNK  
4L;CD3D;CD44;CD86;CDC42;CDC5L;CDH1;CELA1;CELF3;CFLAR;CHD8;CHEK1;CITED2;CNN2;CNOT1;CNOT4;CNPY2;CREBBP;CSF1;CSNK1D;CSNK2A1;CTIF;CTNNB1;CTNND1;CUX1;CUX2;DAB2;DAP;DAPK1;DEDD;DNM2;DNMT3B;DPF2;DVL3;DYNLL1;EGR1;EID2B;EID3;EIF2AK1;EIF2B3;EIF4A2;EIF4EBP2;EIF4H;EL

GAP27;ARHGAP30;ARHGAP31;ARHGDI8;ARHGEF10;ARHGEF11;ARHGEF12;ARID1A;ARID3A;ARID3B;ARL1;ARL6;ARNT;ASB8;ASCC2;ASH2L;ATF5;ATF7;ATG7;ATP6V0A1;ATP6V0C;ATP6V0D1;ATP6V1B2;ATP1F1;ATXN2;B4GALT1;BASP1;BAZ2A;BBS4;BCCIP;BCDIN3D;BCL2L13;BCL6;BCL9;BCO2;BCOR;BCORL1;B  
HGAP23;ARHGAP24;ARHGAP25;ARHGAP26;ARHGAP27;ARHGAP30;ARHGAP31;ARHGDI8;ARHGEF10;ARHGEF11;ARHGEF12;ARID1A;ARID3A;ARID3B;ARL1;ARL6;ARNT;ASB8;ASCC2;ASH2L;ATF5;ATF7;ATG7;ATP6V0A1;ATP6V0C;ATP6V0D1;ATP6V1B2;ATP1F1;ATXN2;B4GALT1;BASP1;BAZ2A;BBS4;BCCIP;BCDI

IT3B;EHD1;EHD3;EIF2D;EPB41L3;ERC1;FAM160A2;FBN2;FGF9;FIS1;FLCN;FOXP3;FZD1;GCC1;GDI2;GLMN;GNAS;GOSR1;HCLS1;IL23A;IL4R;IMMP2L1;JAK3;KATNA1;KDELRL1;KIF13A;KPNB1;LCP1;LCP2;LILRB1;LIN7B;LMTK2;LRP1;LTBP2;MAGI2;MAPK14;MAPRE1;MFN2;MLH3;MRPL45;MX2;MYH9;MYO7A;NACC  
1;THOC

;GTF3A;H1FO;HAX1;HCLS1;HDAC4;HDGF;HIPK2;HNRNPD;HNRNPF;HNRNPUL1;HSPA1B;ING4;INTS3;IRF2;JARID2;KAT5;KAT6A;KAT7;KDM2A;KLF4;KPNB1;LZTS1;MAFB;MAFG;MAML1;MAML3;MAP2K3;MAPK14;MAU2;MAX;MED12;MED25;MIS18A;MKNK2;MLL2;N4BP1;NACC2;NCOA6;NCOR1;NEF  
IP1;CCNK;CDC42;CENPH;CFL1;CFLAR;CHCHD6;CHD8;CHEK1;CLTC;CLTCL1;CNN2;COPA;COPB2;CORO1C;COX18;CREBBP;CSF1R;CSNK1D;CTDP1;CTNNB1;CTS;DAB2;DAG1;DAP3;DCLRE1B;DISC1;DNAJ6;DNAJ19;DNMT3B;DOCK2;DSCC1;DYNLL1;DYSF;ELMO1;ENSA;EP300;EPB41;EPB4L3;ERMN;EYA3;FAM

NKL1;CSNK2A1;CTDP1;CTDSP2;CTNNB1;CTS;CWIC5;DAG1;DAP3;DEDD;DXH8;DNAJ14;DNMT3B;DSCC1;DUT;DYNLL1;EGR1;ELF4;ELL;ELL3;EMG1;EP300;ESR1;EXOSC1;EXOSC3;EXOSC8;EYA3;FANCF;FOXJ2;FOXN3;FOXO4;FOXP3;FUS;GATAD2B;GCK;GIT2;GM2A;GRB2;GTF2F1;GTF3A;H1FO;H2AFY;HAX1;HCL  
AB2;DAP;DAP3;DAPK1;DAPK2;DBNL;DEDD;DNAJ6;DNAJCS;DNM2;DPF2;DYNLL1;DYNLL2;EGR1;ELMO1;ELMO2;EP300;ESR1;FAIM;FAM129B;FAM162A;FIS1;FLCN;FLT3;FURIN;GHITM;GLO1;GNB1;GNRH1;GSN;H1FO;HCK;HCLS1;HERPUD1;HIP1;HIPK2;HK2;HMOX1;HRK;HSPA1B;HSPA5;IGF1R;IL6R;ING4;IRS2  
CA3;CA6;CACNG8;CAMK1D;CAMK2G;CAP1;CASC3;CBL;CCL3;CD14;CD209;CD93;CDC42;CDC42SE1;CDH1;CFL1;CHKA;CHMP4B;CHRN1;CHRN2;CLCN5;CLDN16;CLTA;CLTC;CLTCL1;CNN2;CNNM4;COG8;COLEC12;COPA;COPB2;COP22;CORO1C;COX17;COX18;CPNE7;CPT1A;CPT2;CRTAM;CSF1R;CTNNB1;CTS  
;BECN1;BHLHE40;BRCA1;BRD3;BRD4;BRD8;BRE;BSCL2;BTG2;BTX;BUB3;C1QTNF3;C3;C4BPB;CSAR1;CALCOCO1;CAMK1D;CAMKK2;CAMTA1;CAP1;CARM1;CASC3;CASP9;CAST;CASZ1;CBFA2T3;CBL;CBX1;CBX6;CBY1;CCL3;CCNK;CCRN4L;CD3D;CD44;CD86;CDC42;CDC5L;CDH1;CELA1;CELF3;CFLAR;CHD8;CHE1  
1;CARM1;CASC3;CASZ1;CBFA2T3;CBL;CBX1;CBX6;CBY1;CCL3;CCNK;CCRN4L;CD3D;CD44;CD86;CDC42;CDC5L;CDH1;CELA1;CELF3;CFLAR;CHD8;CHEK1;CHRN2;CITED2;CNOT1;CNOT4;CNPY2;CPT1A;CPT2;CREBBP;CSF1;CSF1R;CSNK

AT3;SYK;TAF4;TAP2;TBC1D20;TGFB1;THOC5;TNIP1;TRIM25;TSG101;UBN1;VIM;WWP2;ZY  
TBC1D  
AB2;DAP;DAP3;DAPK1;DAPK2;DBNL;DEDD;DNAJ6;DNAJCS;DNM2;DPF2;DYNLL1;DYNLL2;EGR1;ELMO1;ELMO2;EP300;ESR1;FAIM;FAM129B;FAM162A;FIS1;FLCN;FLT3;FURIN;GHITM;GLO1;GNB1;GNRH1;GSN;H1FO;HCK;HCLS1;HERPUD1;HIP1;HIPK2;HK2;HMOX1;HRK;HSPA1B;HSPA5;IGF1R;IL6R;ING4;IRS2

;PLEKHM1P;PLEKH02;PREX1;PRKD2;PTAIF;RAB35;RPH3A;SH2B3;SH3PX2B;SH3YL1;SNX1;SNX12;SNX19;SNX24;SNX27;SNX30;SNX33;SYT2;TBC1D2;TBC1D2B;TIRAP;TRIOBP;VAV1;WIPI1;WIPI2;ZFYE  
11;NFKBIA;PHLPP1;PID1;PREX1;PRKAB1;PRKACA;PRKCB;PRKCD;PRKD2;PSEN1;PTK2B;PTPN1;PTPN6;PTPRJ;PXN;RAB7A;RAC1;RAF1;RALB;RBPJ;RHOA;RPS6KA1;RTN4;SGPL1;SH3KBP1;SIPA1L1;SOC2;SPRY2;SQSTM1;SRC;STAT3;STAT5A;STAT5B;SULF2;TGFB1;TLR9;TRAT1;TXNIP;ULK1;VAV1;YWHAB;ZFP1  
;HLA-C;HLA-DPA1;HLA-E;HSPAS;IGF2R;ITSN1;KIF1B;LAMP1;LEFTY2;MARCH8;MMP14;MYH11;MYO7A;MYOF;NBR1;NCF2;NCSN;NEU1;PACS1;PECAM1;POMC;PPT1;PRG2;RAB11FIP1;RAB11FIP4;RAB23;RAB35;RAB3D;RAB43;RAB5B;RAB5C;RAB7A;RAB8A;RAC1;RGL4;RIN3;RPH3A;RPN1;SEC23B;SEC31A;SERPINA1

AB11FIP4;RAB23;RAB35;RAB5B;RAB5C;RAB7A;RAB8A;RIN3;RIPK1;RUFY1;SCAMP2;SLA;SLC11A1;SLC48A1;SNX1;SNX27;SPG21;SQSTM1;SRC;STAP3;TLR9;TMBIM1;TPCN2;TSG101;UVRAG;VAMP8;VPS25;VPS35;WASF2;WIP  
BK;BUB3;C1QTNF3;C3;CSAR1;CALCOCO1;CAMK1D;CAMKK2;CAMTA1;CAP1;CARM1;CASC3;CASZ1;CBFA2T3;CBL;CBX1;CBX6;CBY1;CCL3;CCNK;CCRN4L;CD3D;CD44;CD86;CDC42;CDC5L;CDH1;CELA1;CELF3;CFLAR;CHD8;CHEK1;CHRN2;CITED2;CNOT1;CNOT4;CNPY2;CPT1A;CPT2;CREBBP;CSF1;CSF1R;CSNK

(RAP3;ARF1;ARF3;ARF6;ARFGAP3;ARHGAP1;ARHGAP21;ARHGAP23;ARHGAP24;ARHGAP25;ARHGAP26;ARHGAP27;ARHGAP30;ARHGAP31;ARHGDI8;ARHGEF10;ARHGEF11;ARHGEF12;ARID1A;ARID3A;ARID3B;ARL1;ARL6;ARNT;ASB8;ASCC2;ASH2L;ATF5;ATF7;ATG7;ATP2B4;ATP6V0A1;ATP6V0C;ATP6V0D1  
RPF3;BSCL2;BSG;BTN3A1;BUB3;C11orf73;C1QTNF3;C3;CSAR1;CA13;CA14;CA3;CA6;CACNG8;CAMK1D;CAMK2G;CAP1;CASC3;CBL;CBY1;CCDC135;CCL3;CD14;CD209;CD93;CDC42;CDC42SE1;CDH1;CELF3;CFL1;CHKA;CHMP4B;CHRN1;CHRN2;CHST11;CITED2;CLCN5;CLDN16;CLTA;CLTC;CLTCL1;CNN2;CNN  
ICA1;BRPF3;BTK;CA13;CA14;CA3;CA6;CACNA2D4;CAMKK2;CANT1;CAPN1;CAPN5;CARS;CASZ1;CBFA2T3;CBL;CCNB1IP1;CD209;CD93;CD97;CDH1;CELA1;CHI3L2;CHKA;CHRN1;CHRN2;CLPX;CNOT4;COL5A2;COLEC12;COX11;COX17;COX5A;CPM;CPPED1;CREBBP;CRY2;CTDSP2;CYB5A;CYB5D1;CYP27A1;CY  
1;DAB2;DAG1;DAPK1;DAPK2;DBNL;DGK;DISC1;DNMBP;DOCK2;DOCK5;DOCK6;DOCK8;DOK3;DVL3;EIF4EBP2;ELK1;EMO1;EP300;EPHBI1;ESR1;ESR1;FBP1;FGF9;FIS1;FKBP1A;FLCN;FLT3;FOXO4;GAB2;GBA;GCK;GDI2;GIT2;GMIP;GNAI2;GNAI2;GNB1;GPR183;GRB2;GSK3A;GSN;HAX1;HCLS1;HDAC4;HIPK2;H

;DNAJC14;DNMT3B;DSCC1;DUT;EGR1;ELF4;ELL3;EMG1;EP300;ESR1;EXOSC1;EXOSC3;EXOSC8;EYA3;FANCF;FOXJ2;FOXN3;FOXO4;FOXP3;FUS;GATAD2B;GCK;GIT2;GM2A;GTF2F1;GTF3A;H1FO;H2AFY;HAX1;HCL1;HDAC4;HDGF;HIPK2;HMOX1;HNRNPD;HNRNPF;HNRNPK;HNRNPUL1;HSPA1B;ING4;INTS3

PK5;MARK2;MARK3;MAST3;MERTK;MKNK1;MKNK2;MPP1;NADK;NAGK;NEK3;NEK6;NME1;NME2;NRBP1;NUAK2;PAK1;PFKFB3;PGK1;PHKA2;PIK3CD;PIM1;PIM2;PINK1;PIP4K2C;POLR2A;PRKAB1;PRKACA;PRKCB;PRKCD;PRKD2;PRKDC;PSTK;PTK2B;RAF1;RIPK1;RPS6KA1;SEPHS1;SIK3;SQSTM1;SRC;STK24;STK

PK5;MARK2;MARK3;MAST3;MERTK;MKNK1;MKNK2;NADK;NEK3;NEK6;NME2;NRBP1;NUAK2;PAK1;PFKFB3;PHKA2;PIK3CD;PIM1;PIM2;PINK1;PIP4K2C;POLR2A;PRKAB1;PRKACA;PRKCB;PRKCD;PRKD2;PRKDC;PTK2B;RAF1;RIPK1;RPS6KA1;SIK3;SQSTM1;SRC;STK24;STK32B;STK35;STK4;STK40;SYK;TK2;TP53RK

WIPI  
RC;STAT3;SYK;TAF11;TAF4;TAP2;TBC1D20;TGFB1;THOC5;TIRAP;TNIP1;TRIM25;TSG101;UBN1;VIM;WWP2;ZY  
RC;STAT3;SYK;TAF11;TAF4;TAP2;TBC1D20;TGFB1;THOC5;TIRAP;TNIP1;TRIM25;TSG101;UBN1;VIM;WWP2;ZY  
OX1;PLCG2;POU2F2;PRAM1;PREX1;PRKCB;PRKCD;PRKDC;PSEN1;PTK2B;PTPN6;RAC1;RNF41;SELP;SEMA4A;SLC11A1;SOD1;SOX4;SRC;SRF;STAT5A;STAT5B;STAT6;SYK;TGFB1;TIRAP;TNFSF13;VAV1;W

;NEK3;NEK6;NME2;NRBP1;NUAK2;PAK1;PHKA2;PIM1;PIM2;PINK1;POLR2A;PRKAB1;PRKACA;PRKCB;PRKCD;PRKD2;PRKDC;PTK2B;RAF1;RIPK1;RPS6KA1;SIK3;SQSTM1;SRC;STK24;STK32B;STK35;STK4;STK40;SYK;TP53RK;TRIM27;ULK1;VRK3;WNK1;XRCC6BF  
4;ANKS1A;ANO10;ANP32A;ANPEP;ANXA11;ANXA4;ANXA5;ANXA7;ANXA9;AOAH;AOC2;AP1M1;AP2A1;AP2M1;AP3B1;APBB1P;APC2;APITD1;APLP2;APOA1;APOBEC3C;APP;ARAP1;ARAP3;ARCN1;ARF1;ARF3;ARF6;ARFGAP3;ARHGAP1;ARHGAP21;ARHGAP23;ARHGAP24;ARHGAP25;ARHGAP26;ARHGAP27;

I30;SETD1B;SIN3A;SMARCA2;SMARCD2;SUPT3H;TET3;TGFB1;UBN1;USP22;UTP3;WDR61;WDR82;YEAT  
ICA1;BRPF3;BTB;CA13;CA14;CA3;CA6;CACNA2D4;CAMKK2;CANT1;CAPN1;CAPNS1;CARS;CAS21;CBFA2T3;CBL;CCNB1P1;CD209;CD93;CD97;CDH1;CELA1;CLPX;CNOT4;COL5A2;COLEC12;COX11;COX17;COX5A;CPM;CPED1;CREBBP;CRY2;CTDSP2;CYB5A;CYB5D1;CYP27A1;CYP2R1;CYP4F3;DAG1;DGKG;DHX

CA3;CA6;CACNG8;CAMK1D;CAMK2G;CAP1;CASC3;CBL;CCL3;CD14;CD209;CD93;CDC42;CDC42SE1;CDH1;CFL1;CHKA;CHMP4B;CHRN1;CHRN2;CLCN5;CLDN16;CLTA;CLTC;CLTCL1;CNN2;CNNM4;COG8;COLEC12;COPA;COPB2;COPZ2;CORO1C;COX17;COX18;CPNE7;CPT1A;CPT2;CRTAM;CSF1R;CTNNB1;CTS

N6;RAC1;RNF41;SEMA4A;SLC11A1;SOD1;SOX4;SRC;SRF;STAT5A;STAT5B;STAT6;SYK;TGFB1;TIRAP;TNFSF13;VAV1;W  
\*RKD2;PSEN1;PTPN1;PTPRJ;PVR;RIPK1;RPS6KA1;SAMHD1;SELL;SH2D1A;SIN3A;SLC11A1;SPG21;STAT5A;STAT5B;STAT6;SYK;TAP2;TGFB1;TIRAP;TLR9;TNFSF13;TNIP1;TRAT1;TRIM27;UBE2V1;VASP;WAS;XI/  
\*P57A;COPS8;CREBBP;CSF1;CSF1R;CSNK1D;CSNK2A1;CTDP1;CTDSP2;CTIF;DAB2;DAPK1;DAPK2;DBNL;DENND3;DISC1;DNAJB12;DNAJB5;DNAJB6;DNAJC14;DNAJC18;DNAJC19;DNAJC5;DNAJC5B;DNMT3B;DPAGT1;DPH5;DSCC1;DUSP12;DUSP18;DVL3;DYRK4;EGR1;EIF2AK1;EIF2B3;EIF4A2;EIF4EBP2;EIF4H;EIF  
CCNK;CCRN4L;CD3D;CD86;CDC42;CDC5L;CDH1;CELA1;CELF3;CFAR;CHD8;CHEK1;CITED2;CNOT1;CNOT4;CREBBP;CSNK2A1;CTDP1;CTDSP2;CTNNB1;CTNND1;CUX1;CUX2;DAB2;DAP;DEDD;DNAJB6;DNM2;DNMT3B;DPF2;DSCC1;DVL3;DYNLL1;EGR1;EID2B;EID3;ELF4;ELK1;ELL;ELL3;ENO1;EP300;ERC1;ERF;ES  
;PTPN1;RAC1;RAC2;RHOA;SIPA1L1;SPTB;SRF;SRGAP2;SRI;SSH1;SSH2;TLN1;TMSB10;TMSB15B;TNNC1;TPM3;TPM4;TRIOBP;VASP;VIM;WAS;WASF  
CCNK;CCRN4L;CD3D;CD86;CDC42;CDC5L;CDH1;CELA1;CELF3;CFAR;CHD8;CHEK1;CHRN2;CITED2;CNOT1;CNOT4;CREBBP;CSNK2A1;CTDP1;CTDSP2;CTNNB1;CTNND1;CUX1;CUX2;DAB2;DAP;DEDD;DNAJB6;DNM2;DNMT3B;DPF2;DSCC1;DVL3;DYNLL1;EGR1;EID2B;EID3;ELF4;ELK1;ELL;ELL3;ENO1;EP300;ER  
;CIQTNF3;C3;C4BPB;CSAR1;CALCOCO1;CAMK1D;CAMKK2;CAMTA1;CAP1;CARM1;CASC3;CASZ1;CBFA2T3;CBL;CBX1;CBX6;CBY1;CCL3;CCNK;CCRN4L;CD3D;CD44;CD86;CDC42;CDC5L;CDH1;CELA1;CELF3;CFAR;CHD8;CHEK1;CHRN2;CITED2;CNOT1;CNOT4;CPT1A;CPT2;CREBBP;CSF1;CSF1R;CSNK1D;CSNK2  
1;UBN1;VIM;WWP2;ZY  
\*SA;DAB2;DAG1;DENND1A;DNAJC14;DNAJC19;DNM2;EHD1;EHD3;EIF2D;ERC1;FABP6;FAM160A2;FGF9;FIS1;FLVCR2;FOXP3;FZD1;GCC1;GCK;GDI2;GLMN;GLUL;GNAS;GOSR1;GRB10;GSK3A;HCL1;HDLBP;HK1;HK2;HMGN3;HNRNPK;IL23A;IL4R;IMMP2L;INSR;IRS2;JAK3;KCNAS;KCNKG2;KDEL1R;KIF13A;KPNB1

\*2;RAPGEF1;RCC1;RGL3;RGL4;RGS10;RGS16;RGS3;RIN2;RIN3;SH2D3C;SIPA1L1;SIPA1L2;SMAP2;SRGAP2;STARD8;TBC1D1;TBC1D14;TBC1D19;TBC1D2;TBC1D20;TBC1D2B;TBC1D5;TBC1D8;TBC1D9;VAV1;W  
/B5A;CYB5R3;CYP2R1;CYP4F3;DAB2;DENND1A;DNAJC14;DNAJC5;DNM2;DOCK2;DPAGT1;DSCR3;DYSF;ELOVL1;ELOVL3;EPS15L1;ERC1;ERGC1;EXTL3;FIG4;FKBP1A;FLOT2;FURIN;GALNT11;GALNT2;GCC1;GCNT7;GOLGA2;GOLGA5;GOLGB1;GOLIM4;GOSR1;GRB2;HAX1;HERPUD1;HIP1;HIPK2;HLA-B;HLA-C;HL  
ARFGAP3;ARHGAP26;ARHGAP27;ARHGEF10;ARHGEF11;ARID1A;ARID3A;ARID3B;ARL1;ARNT;ARSD;ARSG;ASAH1;ASB8;ASCC2;ASH2L;ATF5;ATF7;ATG2A;ATG7;ATP2B4;ATP55;ATP6V0D1;ATPIF1;ATXN2;B3GNT9;B4GALT1;B4GALT4;B4GALT5;BASP1;BAZZA;BCPIP;BCDIN3D;BCKDHA;BCL6;BCL9;BCO2;BCOR;B

;POU5F1;PPP1R10;PRKACA;PTTG1P;RAB23;RAB7A;RAMP1;RBM22;RERE;RHOA;RPAIN;RPH3A;RPL6;RPLP0;RPN1;RPS10;RPS9;SEC23B;SEC61G;SLC11A1;SMURF1;SNX1;SOX4;SPCS1;SRP54;SRPR;SSR2;STAT3;STX18;TACC3;TAP2;TGFB1;TIMM8A;TIMM9;TLR9;TNPO3;TOMM22;TOMM7;TRAK1;TXNIP;XPO6;X  
\*SNK2A1;CTDP1;CTNNB1;CTNND1;CUX1;CUX2;DAB2;DAP;DEDD;DNM2;DNMT3B;DPF2;DSCC1;DVL3;DYNLL1;EGR1;EID2B;EID3;ELF4;ELK1;ELL;ELL3;ENO1;EP300;ERC1;ERF;ESR1;ESRP2;EYA3;FAM120B;FAM58A;FLCN;FOSL2;FOXJ2;FOXN3;FOXO4;FOXP3;FZD1;GAS7;GLI1;GLO1;GTF2F1;GTF2H5;GTF3A;GTPBP1;HAX1  
BHLHE40;BNIP3;BRCA1;BRD3;BRD4;BRD8;BRE;BRPF3;BTG2;BTB;BUB3;BZW2;C3;CSAR1;CALCOCO1;CAMK1D;CAMK2G;CAMKK2;CAMTA1;CANT1;CAPN1;CARM1;CARS;CASC3;CASZ1;CBFA2T3;CBL;CBX1;CBX6;CBY1;CCL3;CCNB1P1;CCNK;CCRN4L;CD3D;CD44;CD86;CDC42;CDC5L;CDH1;CDK13;CELA1;CELF3;I

C1;RGL3;RGL4;RGS10;RGS16;RGS3;RIN2;RIN3;SH2D3C;SIPA1L1;SIPA1L2;SMAP2;SRGAP2;STARD8;TBC1D1;TBC1D14;TBC1D19;TBC1D2;TBC1D20;TBC1D2B;TBC1D5;TBC1D8;TBC1D9;VAV1;W  
\*BEC3C;ARF1;ARF3;ARF6;ARL1;ARSD;ARSG;ASAH1;ASH2L;ASPRV1;ATG7;ATP2B4;ATP6V0C;ATP6V0D1;ATP6V1B2;B3GNT9;B4GALT1;B4GALT4;B4GALT5;BBS4;BCDIN3D;BCKDHA;BCO2;BCOR;BPNT1;BRAP;BRCA1;BTB;C1RL;C3orf33;CA13;CA14;CA3;CA6;CAMK1D;CAMK2G;CAMKK2;CANT1;CAPN1;CAPNS1;C

;PTPN6;PTPRJ;PVR;RAC1;RIPK1;RPS6KA1;SH2D1A;SIN3A;SLC11A1;SPG21;SRC;STAT5A;STAT5B;STAT6;SYK;TAP2;TGFB1;TIRAP;TLR9;TNFSF13;TNIP1;TRAT1;UBE2V1;VASP;VAV1;WAS;XI/  
A1;CTIF;CTNNB1;CTNND1;CUX1;CUX2;DAB2;DAP;DAPK1;DEDD;DNM2;DNMT3B;DPF2;DSCC1;DVL3;DYNLL1;EGR1;EID2B;EID3;EIF2AK1;EIF2B3;EIF4A2;EIF4EBP2;EIF4H;ELF4;ELK1;ELL;ELL3;ENO1;EP300;ERC1;ERF;ESR1;EYA3;FAM120B;FAM129A;FAM58A;FLCN;FOSL2;FOXJ2;FOXN3;FOXO4;FOXP3;FZD1;GAS  
EBBP;CSNK2A1;CTDP1;CTIF;CTNNB1;CTNND1;CUX1;CUX2;DAB2;DAP;DAPK1;DEDD;DNM2;DNMT3B;DPF2;DSCC1;DVL3;DYNLL1;EGR1;EID2B;EID3;EIF2AK1;EIF2B3;EIF4A2;EIF4EBP2;EIF4H;ELF4;ELK1;ELL;ELL3;ENO1;EP300;ERC1;ERF;ESR1;EYA3;FAM120B;FAM129A;FAM58A;FLCN;FOSL2;FOXJ2;FOXN3;FOX

;IRS2;ITSN1;KIF18;MARK2;MYOF;NDUFAB1;NSFL1C;OSBP;OSBPL2;PCYT1A;PHF12;PHLPP1;PITPNA;PLCG2;PLCL2;PLEK;PLEKH2;PLEKHG6;PLEKHM1P;PLEKH2O;PLIN1;PRAM1;PREX1;PRKD2;PSAP;PTAFR;PYGL;RAB35;RBP5;RPH3A;RUFY1;SELL;SH2B3;SH3PX2D;SH3YL1;SNX1;SNX12;SNX19;SNX24;SNX27;S

\*A1L1;SPTB;SRF;SSH1;SSH2;TLN1;TMSB10;TMSB15B;TRIOBP;VASP;WAS;WASF

DC;RAF1;RIPK1;RPS6KA1;SIK3;SQSTM1;STK24;STK32B;STK35;STK4;STK40;TP53RK;ULK1;WNK1;XRCC6BP  
ARHGEF10;ARHGEF11;ARHGEF12;ARID1A;ARL1;ARL6;ARNT;ASB8;ASH2L;ATG7;ATP6V0A1;ATP6V0C;ATP6V0D1;ATP6V1B2;B4GALT1;BBS4;BCCIP;BCDIN3D;BCL6;BCL9;BECN1;BIN2;BLOC1S3;BNIP3;BPNT1;BRAP;BRCA1;BRD8;BRE;BSG;BTG2;BTX;BTN3A1;C11orf73;C1QTNF3;C3;CSAR1;CACNG8;CALCOCO1;C

D1;SH2D1A;SIN3A;STAT5A;STAT5B;TGFB1;TIRAP;TLR9;TNFRSF1B;TNIP1;UBE2V1;XIA

4;CD209;CD93;CDC42;CDC42SE1;CDH1;CFL1;CHKA;CHMP4B;CHRN1;CHRN2;CLDN16;CLTA;CLTC;CLTCL1;CNN2;CNNM4;COLEC12;COPA;COPB2;CORO1C;COX17;CPT1A;CPT2;CRTAM;CSF1R;CTNNB1;CUX1;CXCR2;DAB2;DAG1;DAPK1;DENND1A;DENND3;DNAJC19;DNAJC5;DNM2;DOCK2;DSCR3;EHD1;EHD

2;

AK2;IRF2;ITGB2;JAK1;JAK3;KIR3DL1;KLRC4-KLRK1;LAT2;LCP1;LCP2;LILRA1;LILRB1;LILRB2;LTB4R;MAP2K1;MAP2K3;MAP3K5;MAPK14;MBP;MEFV;MX2;MYB;MYD88;MYO1F;NCF2;NFAM1;NFKB1;NFKBIA;NLR4;NLRP3;NLRX1;NOD2;NOTCH1;NOTCH2;NUB1;PAK1;PCBP2;PIK3CD;PLCG2;PNMA1;POLR3F;POU  
;EGR1;ELF4;ELK1;ELL;ELL3;EP300;ESR1;EXTL3;EYA3;FAM129A;FBXO22;FKBP1A;FLCN;FLT3;FOXJ2;FOXO4;FOXP3;FURIN;FZD1;GAPDH5;GBA;GCK;GLI1;GLMN;GNAI2;GNAL;GNAS;GRB10;GRB2;GSK3A;GTF2F1;GTPBP1;HAX1;HCLS1;HDAC4;HDGF;HERPUD1;HEXB;HIPK2;HIVEP3;HMGN3;HMOX1;HNRNP;HNR

AP4K4;MAPK13;MAPK14;MAPKAPK5;MARK2;MARK3;MAST3;MERTK;MKNK1;MKNK2;MPP1;NADK;NAGK;NEK3;NEK6;NME1;NME2;NMNAT1;NRBP1;NUAK2;PAK1;PCYT1A;PKFB3;PGK1;PHKA2;PIK3CD;PIM1;PIM2;PINK1;PIP4K2C;POLE4;POLR2A;POLR3F;PRIM1;PRKAB1;PRKACA;PRKCB;PRKCD;PRKD2;PRKI

;GNB1;GRB2;GSK3A;GTF2H5;HDGF;HERPUD1;HFE;HIPK2;HMOX1;HSPA5;IGF1R;ING4;INTS3;IRAK2;KATS;KIAA1324;LZTS1;MAP2K1;MAP2K3;MAP3K5;MAP4K4;MAPK14;MAPKAPK5;MAX;MLH3;MRP535;MYOF;NACC2;NBR1;NCOA6;NCOR1;NDEL1;NDNL2;NDRG1;NEK6;NFKBIA;NHEJ1;NOD2;NOTCH1;NSMC

PRKCD;PSEN1;PTTG1;PXN;RHOA;RIPK1;SH3BGR;SH3KBP1;SH3PX2B;SIRPA;SKI;SQSTM1;SRC;TACC3;TBL1X;TLN1;TP53BP2;UVRAG;VASP;WBSP5;XPA;YWHAB;YWHAG;YWHAH;ZFP1C

;PPM1F;PRKACA;PRKCB;PRKCD;PRKD2;PRKDC;PRMT5;PRMT6;PSEN1;PTK2B;PTPN6;PXN;RAB3D;RAF1;RPN1;RTF1;SAP130;SEC31A;SEMA4D;SIN3A;SOX4;SPRED1;SPRY2;SRC;STAT5A;STK4;STT3A;SUPT3H;SYK;TGFB1;TTL4;UAP1;UGGT1;USP22;WDR61;YEATS4;ZDHHI

CUX2;DAB2;DAP;DEDD;DNM2;DNMT3B;DPF2;DVL3;DYNLL1;EGR1;EID2B;EID3;ELF4;ELK1;ELL;ELL3;ENO1;EP300;ERC1;ERF;ESR1;EYA3;FAM120B;FAM58A;FLCN;FOSL2;FOXJ2;FOXN3;FOXO4;FOXP3;FZD1;GAS7;GLI1;GLO1;GTF2F1;GTF2H5;GTF3A;HAX1;HCK;HCLS1;HDAC4;HDGF;HESX1;HEXB;HIP1;HIPK2;HIVI

K5;DOCK6;DOCK8;DYNLL1;EIF2B3;ENSA;ESR1;FURIN;GDI2;GIT2;GLMN;GM2A;GMIP;GTF2F1;IQSEC1;ITSN1;KLF4;LMTK2;MAP2K1;MAP3K5;MAP4K4;MAPRE3;MMP14;NCOR1;NLRP12;NOTCH1;OAZ2;PAPLN;PIK3R5;PLEKHG6;PPP1R10;PPP1R11;PPP1R12B;PPP2R2D;PREX1;PRKCD;PRKRA;PSAP;PSMD3;PSME  
NND1;CUX1;CUX2;DAB2;DAP;DEDD;DNM2;DNMT3B;DPF2;DVL3;DYNLL1;EGR1;EID2B;EID3;ELF4;ELK1;ELL;ELL3;ENO1;EP300;ERC1;ERF;ESR1;EYA3;FAM120B;FAM58A;FLCN;FOSL2;FOXJ2;FOXN3;FOXO4;FOXP3;FZD1;GAS7;GLI1;GLO1;GTF2F1;GTF2H5;GTF3A;HAX1;HCK;HCLS1;HDAC4;HDGF;HESX1;HEXB;HIP

IMGN3;HNRNP;HNRNP;IGF1R;IKZF1;IL23A;INSR;JAK3;KATS;KAT6A;KLF13;KLF4;KLF7;KLRC4-KLRK1;LILRB1;LPIN2;MAFB;MAML1;MAML3;MAP2K1;MAP2K3;MAPK14;MAPRE3;MED12;MED25;MLL2;MTF1;MYB;NCOA6;NFIC;NFKB1;NFKBIA;NFYC;NOD2;NOTCH1;NSD1;PAF1;PBX2;PHF2;PHF8;PID1;PIM2;PK  
3X6;CBY1;CCL3;CCNK;CCRN4L;CD3D;CD44;CD86;CDC42;CDC5L;CDH1;CELA1;CELF3;CFLAR;CHD8;CHEK1;CITED2;CNN2;CNOT1;CNOT4;CNPY2;CPHF7;CREBBP;CRNKL1;CSF1;CSNK1D;CSNK2A1;CTDP1;CTIF;CTNNB1;CTNND1;CUX1;CUX2;CWC15;DAB2;DAP;DAPK1;DEDD;DXH8;DNM2;DNMT3B;DPF2;DVL3;DYN  
COPS8;CREBBP;CSF1;CSF1R;CSNK1D;CSNK2A1;CTDP1;CTDSP2;DAB2;DAPK1;DAPK2;DBNL;DISC1;DNMT3B;DPAGT1;DPH5;DSCC1;DUSP12;DUSP18;DVL3;DYRK4;EGR1;EIF2AK1;EP300;EPHB1;EPHB2;ERC1;EXOSC3;EXTL3;EYA3;F13A1;FAM129A;FAM58A;FBXO22;FBXO25;FKBP1A;FKBP5;FKBP9;FLCN;FLT3;FNT

V1;JAK1;JAK3;LCP2;LEFTY2;LRP1;LTBP2;MAGI2;MAP2K1;MAPK13;MAPK14;MKNK1;MYD88;MYOF;NCOR1;NCSTN;NDST1;NFKB1;NFKBIA;NOTCH1;PHLPP1;PID1;POU5F1;PREX1;PRKAB1;PRKACA;PRKCB;PRKCD;PRKD2;PSEN1;PTK2B;PTPN1;PTPN6;PTPRJ;PXN;RAB7A;RAC1;RAF1;RALB;RBP1;RHOA;RPS6KA1;R

D2;CNOT1;CNOT4;CNPY2;CREBBP;CSNK2A1;CTDP1;CTIF;CTNNB1;CTNND1;CUX1;CUX2;DAB2;DAP;DAPK1;DEDD;DNM2;DNMT3B;DPF2;DSCC1;DVL3;DYNLL1;EGR1;EID2B;EID3;EIF2AK1;EIF2B3;EIF4A2;EIF4EBP2;EIF4H;ELF4;ELK1;ELL;ELL3;ENO1;EP300;ERC1;ERF;ESR1;EYA3;FAM120B;FAM129A;FAM58A;FBP

;NACC2;NAPA;NFKBIA;NLRP12;NLRP3;NUP98;NUPL2;NXT1;OPTN;OS9;PACS1;PAK1;PDCDC6;PEX7;PID1;PMPCB;POU5F1;PPP1R10;PRKACA;PTTG1IP;RAB23;RAB7A;RALB;RALGAP2;RAMP1;RBM27;RERE;RHOA;RPAIN;RPH3A;RPL6;RPLP0;RPN1;RPS10;RPS9;RRAGB;RRAGC;SEC23B;SEC6G1;SH3PX2B;SIN3A;

TSA;STAT5B;SULF2;SYK;TGFB1;TIRAP;TLR9;TRIM25;TRIM27;ZNF28

1;HLA-E;HMOX1;IFNAR2;IL17RA;IL23A;IL4R;IL6R;IRAK2;IRF2;ITGAX;ITGB2;JAK1;JAK3;KDM6B;KLF4;KLRC4-KLRK1;LILRA1;LILRB1;LILRB2;LIPA;LSP1;LTA4H;LTB4R;MAP2K1;MAP2K3;MAP3K5;MAPK13;MAPK14;MEFV;MICU1;MLF2;MMP25;MX2;MYD88;MYO1F;NCF2;NDST1;NFAM1;NFKB1;NFKBIA;NLR4;NLI

IMGN3;HNRNP;HNRNP;IGF1R;IKZF1;IL23A;INSR;JAK3;KATS;KAT6A;KLF13;KLF4;KLF7;LILRB1;LPIN2;MAFB;MAML1;MAML3;MAP2K1;MAP2K3;MAPK14;MAPRE3;MED12;MED25;MLL2;MTF1;MYB;NCOA6;NFIC;NFKB1;NFKBIA;NFYC;NOTCH1;NSD1;PAF1;PBX2;PHF2;PHF8;PID1;PIM2;PKNOX1;PLAC8;POLR2  
1;DNM2;DNMT3B;DVL3;ECE1;EGR1;ELF4;ELK1;ELL;ELL3;EP300;ESR1;EXTL3;EYA3;FAM129A;FBXO22;FGF9;FKBP1A;FLCN;FLT3;FOXJ2;FOXO4;FOXP3;FURIN;FZD1;GAPDH5;GBA;GCK;GLI1;GLMN;GNAI2;GNAL;GNAS;GRB10;GRB2;GSK3A;GTF2F1;GTPBP1;HAX1;HCLS1;HDAC4;HDGF;HERPUD1;HEXB;HIPK2;HIVE

422;RBM8A;RERE;RHOA;RPAIN;RPL6;RPLP0;RPN1;RPS10;RPS9;SEC16A;SEC22A;SEC23B;SEC31A;SEC61G;SLC11A1;SMG7;SMURF1;SNX1;SNX27;SOX4;SPCS1;SR1;SRP54;SRPR;SRSF2;SRSF4;SRSF7;SSR2;STAT3;STX18;TACC3;TAP2;TGFB1;THOCS;TIMM8A;TIMM9;TLR9;TNPO3;TOMM22;TOMM7;TPCN2;TRAK1;

IL6;ARSD;ARSG;ASH2L;ATF7;ATP2B4;ATP55;ATP6V1B2;B4GALT1;B4GALT4;B4GALT5;BAZ2A;BCKDHA;BCL6;BCO2;BPNT1;BRAP;BRCA1;BRPF3;BTX;CA13;CA14;CA3;CA6;CACNA2D4;CAMK1D;CAMK2G;CAMKK2;CANT1;CAPN1;CAPNS1;CARS;CASZ1;CBFA2T3;CBL;CBR3;CCBL1;CCNB1IP1;CD209;CD93;CD97;CD

YO1F;NBR1;NCOR1;NDEL1;NEK6;NFKB1;NFKBIA;NLR4;NLRP12;NLRP3;NLRP6;NOD2;NSMCE4A;OSMR;PACS1;PAFAH1B1;PAK1;PCBP2;PLAUR;PLEK;POLR3F;PRKCD;PTK2B;PTPN1;PTPN6;PTPRJ;PVR;RAC1;RIPK1;RPS6KA1;SAMHD1;SETMAR;SH2D1A;SIN3A;SPRED1;STAT5A;STAT5B;STK24;SYK;TBC1D14;TGFB  
S10;RGS16;RGS3;SEMA4D;SIPA1L1;SMAP2;SPRY2;SRGAP2;TBC1D14;TBC1D2;TNFRSF1B;TNNC1;TP53INP2;TRIM67;ULK1;UVR1

D2;CNOT1;CNOT4;CREBBP;CSNK2A1;CTDP1;CTIF;CTNNB1;CTNND1;CUX1;CUX2;DAB2;DAP;DAPK1;DEDD;DNM2;DNMT3B;DPF2;DSCC1;DVL3;DYNLL1;EGR1;EID2B;EID3;EIF2AK1;EIF2B3;EIF4A2;EIF4EBP2;EIF4H;ELF4;ELK1;ELL;ELL3;ENO1;EP300;ERC1;ERF;ESR1;EYA3;FAM120B;FAM129A;FAM58A;FBP1;FLCN

SNK2A1;CTDP1;CTDSP2;DAB2;DAPK1;DAPK2;DBNL;DISC1;DNMT3B;DPAGT1;DPH5;DSCC1;DUSP12;DUSP18;DVL3;DYRK4;EGR1;EIF2AK1;EP300;EPHB1;EPHB2;ERC1;EXTL3;EYA3;F13A1;FAM129A;FAM58A;FBXO22;FBXO25;FKBP1A;FKBP5;FKBP9;FLCN;FLT3;FNTB;FOXP3;FURIN;FZD1;G6PD;GALNT11;GALNT2;  
SNK2A1;CTDP1;CTDSP2;DAB2;DAPK1;DAPK2;DBNL;DISC1;DNMT3B;DPAGT1;DPH5;DSCC1;DUSP12;DUSP18;DVL3;DYRK4;EGR1;EIF2AK1;EP300;EPHB1;EPHB2;ERC1;EXTL3;EYA3;F13A1;FAM129A;FAM58A;FBXO22;FBXO25;FKBP1A;FKBP5;FKBP9;FLCN;FLT3;FNTB;FOXP3;FURIN;FZD1;G6PD;GALNT11;GALNT2;

A1L2;SMAP2;SPRY2;SQSTM1;SRGAP2;STARD8;TBC1D2;TIMP2;TRIM67;VAV;  
IF2B3;ELOVL1;ELOVL3;EMG1;EP300;EPHB1;EPHB2;EXTL3;F13A1;FKBP1A;FLT3;FNTB;GALNT11;GALNT2;GCK;GCNT7;GSK3A;GSTA4;HCK;HENMT1;HGSNAT;HIPK2;HK1;HK2;IGF1R;IGF2R;INSR;IP6K1;IRAK2;ITPK1;JAK1;JAK3;KATS;KAT6A;KAT7;KSR1;LCMT2;LIMK1;LIMK2;LIPT1;LMTK2;LPCAT3;LRRK1;MAP2K1

IAP2;SRP54;TBC1D  
PRY2;SRGAP2;SRP54;TBC1D  
REX1;PRKCD;PTK2B;RAB23;RAB35;RAB3D;RAB43;RAB5B;RAB5C;RAB7A;RALBP1;RALGAPA2;RGS10;RGS16;RGS3;RNF213;RRAGC;SEMA4D;SIPA1L1;SLC9A1;SMAP2;SMUG1;SPRY2;SRGAP2;SRP54;TBC1D2;TGFB1;VCA  
OAI1;APOBEC3C;APOBR;APP;ARAP1;ARAP3;ARF1;ARF3;ARF6;ARFGAP3;ARHGAP26;ARHGAP27;ARHGEF10;ARHGEF11;ARID1A;ARID3A;ARID3B;ARL1;ARNT;ARSD;ARSG;ASAH1;ASB8;ASCC2;ASH2L;ASPRV1;ATF5;ATF7;ATG2A;ATG7;ATP2B4;ATP55;ATP6V0D1;ATPIF1;ATXN2;B3GNT9;B4GALT1;B4GALT4;B4G  
2;NAPA;NFKBIA;NLRP12;NLRP3;NUP98;NUPL2;NXT1;OPTN;OS9;PACS1;PAK1;PDCD6;PEX7;PID1;PMP2B;POU5F1;PPP1R10;PRKACA;PTTG1IP;RAB23;RAB7A;RALB;RALGAPA2;RAMP1;RBM22;RERE;RHOA;RPAIN;RPH3A;RPL6;RPLP0;RPN1;RPS10;RPS9;RRAGB;RRAGC;SEC23B;SEC61G;SH3PYD2B;SIN3A;SLC11A

RGIC1;ESD;ESR1;FABP6;FIG4;FURIN;GALNT11;GALNT2;GCC1;GCNT7;GDI2;GIMAP8;GOLGA2;GOLGA5;GOLGB1;GOLIM4;GOLM1;GOSR1;GRB2;H1FO;HCK;HIP1;HLA-B;HLA-C;HLA-DPA1;HLA-E;IGF2R;KCNAS;KDELR1;KIF13A;KIF1C;KRT2;LMTK2;LOC388152;LZTS1;MAN2A2;MAP2K1;MAPRE1;MMP14;NCSTN;N

T3;CBL;CCL3;CD14;CD1D;CD3D;CD44;CD86;CDC42;CDC42EP4;CDH1;CELA1;CELF3;CFL1;CFAR;CHD8;CHEK1;CHRN2;CITED2;CNPY2;CPT1A;CREBBP;CRTAM;CSF1;CSF1R;CSNK1D;CSNK2A1;CTDP1;CTDSP2;CTNNA1;CTNNB1;CXCR2;DAB2;DAPK1;DAPK2;DBNL;DEDD;DISC1;DNM2;DNMT3B;DOCK2;DPF2;DVL  
;PTX3;RAC1;SAAL1;SERPINA1;SLC11A1;STAT3;STAT5A;STAT5B;SYK;TGFB1;TIRAP;TLR9;TNFRSF1B;TNIP1;XI  
IARK2;MERTK;MKNK1;MKNK2;MYD88;NBR1;NCOR1;NDST1;NEK6;NFKBIA;NKIRAS2;NLRP12;NLRP3;NOD2;NOTCH1;PAFAH1B1;PAK1;PIK3R5;PIM2;PINK1;PLEK;PRDX4;PRKACA;PRKCB;PRKCD;PRKD2;PSAP;PSEN1;PTK2B;PTPN1;PTPN6;PTPRJ;PXN;RAF1;RGS3;RHOA;RIPK1;RNF41;RPS6KA1;SH2D3C;SLC44A2;S

3C1D:  
A;KLF13;KLF4;KLF7;LILRB1;LPIN2;MAFB;MAMLI1;MAMLI3;MAP2K1;MAP2K3;MAPK14;MAPRE3;MED12;MED25;MLL2;MTF1;MYB;NCOA6;NFIC;NFKB1;NFKBIA;NFYC;NOTCH1;NSD1;PAF1;PBX2;PHF2;PHF8;PID1;PIM2;PKNOX1;PLAC8;POLR2A;POMC;POU2F2;POU5F1;PRKD2;PRKDC;RBM20;RBM22;RBPJ;RIPK

35;CASC3;CASP6;CASP9;CBL;CCL3;CCNB1IP1;CCNK;CD44;CD86;CDC42;CDH1;CDKL3;CELA1;CFL1;CFAR;CHEK1;CHST11;CHST15;CHST7;CLPX;CNOT4;COPS7A;COPS8;CPM;CPVL;CREBBP;CSF1;CSF1R;CSNK1D;CSNK2A1;CTDP1;CTDSP2;CTIF;CTNNB1;CTSA;CTSB;CTSD;CTS2;DAB2;DAG1;DAPK1;DAPK2;DBNL;DEI

ISE1;CDC5L;CDH1;CDV3;CENPH;CERKL;CFL1;CFL2;CHCHD1;CHEK1;CITED2;CKAP4;CLIP2;CLPX;CLTC;CLTCL1;CNFN;CNN2;CNOT1;COPB2;CORO1C;COTL1;CPT2;CREBBP;CSNK1D;CSNK2A1;CTDP1;CTNNA1;CTNNAL1;CTNNB1;CTSB;DAG1;DAP3;DAPK1;DBNL;DCLRE1B;DEDD;DISC1;DNAH17;DNAJB6;DNAJC14;DI  
ISE1;CDC5L;CDH1;CDV3;CENPH;CERKL;CFL1;CFL2;CHCHD1;CHEK1;CITED2;CKAP4;CLIP2;CLPX;CLTC;CLTCL1;CNFN;CNN2;CNOT1;COPB2;CORO1C;COTL1;CPT2;CREBBP;CSNK1D;CSNK2A1;CTDP1;CTNNA1;CTNNAL1;CTNNB1;CTSB;DAG1;DAP3;DAPK1;DBNL;DCLRE1B;DEDD;DISC1;DNAH17;DNAJB6;DNAJC14;DI  
;EYAS3;FAM129A;FBXO22;FGF9;FKBP1A;FLCN;FLT3;FOXJ2;FOXO4;FOXP3;FURIN;FZD1;GAPDH5;GBA;GCK;GLI1;GLMN;GNAI2;GSK3A;GTF2F1;GTPBP1;HAX1;HCLS1;HDAC4;HDGF;HERPUD1;HEXB;HIPK2;HIVEP3;HMGN3;HMOX1;HNRNP;HNRNP;HSPA5;IGF1R;IKZF1;IL23A;IL6R;INSR;IRAK2;IRS2;ITGA5;JAK3;J

;SPPL3;SRI;SV2B;SYT2;TGFB1;TMEM67;ULK1;VAMP2;VAMP  
3C1D:

ULT4;B4GALT5;BASP1;BAZ2A;BBS4;BCCIP;BCDIN3D;BCL6;BCL9;BCOR;BCORL1;BECN1;BHLHE40;BINP3;BRCA1;BRD3;BRD4;BRD8;BRE;BRPF3;BTG2;BTX;BUB3;BZW2;C1QTNF3;C1RL;C3;C4BPB;C5AR1;CALCOCO1;CAMK1G;CAMK2G;CAMKK2;CAMTA1;CANT1;CAPN1;CARM1;CARS;CASC3;CASP6;CASP9;CASZ1;C  
JC;ATP6V0D1;ATP6V1B2;B4GALT1;BBS4;BCL6;BCL9;BINP3;BRAP;BRCA1;BRD8;BRE;BSG;BTX;BTN3A1;C1QTNF3;C3;C5AR1;CACNG8;CALCOCO1;CAMK2G;CAMKK2;CANT1;CAP1;CARM1;CASP9;CBL;CBY1;CC2D2A;CCL3;CD101;CD14;CD209;CD3D;CD44;CD53;CD86;CD97;CDC42;CDC42EP4;CDC42SE1;CELA1;C  
AMP8;WA  
IF;PRKCD;PTAFR;PTPN1;PTPN6;PVR;RIPK1;RPS6KA1;SAMHD1;SH2D1A;SIN3A;SLC11A1;STAT5A;STAT5B;SYK;TGFB1;TIRAP;TLR9;TNIP1;TRIM25;TXNIP;UBE2V1;XIA

ILK1;YWHAG;ZC3HC:  
FAM1;FAM129B;FAM162A;FIS1;FLCN;FLT3;FURIN;GLO1;GNRH1;HCK;HCLS1;HERPUD1;HIP1;HIPK2;HMOX1;HRK;HSPA1B;HSPA5;IGF1R;IL6R;ING4;IRS2;ITGA5;ITSN1;JAK3;KIAA1324;KLF4;LILRB1;MAEA;MAP3K5;MMP9;NACC2;NAE1;NCF2;NDUFS3;NFKB1;NLR4;NLRP12;NLRP3;NME1;NME2;NOD2;NOTCH1;  
DAP;DAPK1;DAPK2;DEDD;DENND3;DHTKD1;DISC1;DNAJB6;DNM2;ECE1;EIF4A2;ENO1;ESD;EXOSC1;EXOSC3;EXOSC8;FBP1;FBXO22;FIS1;FUNDC1;FURIN;G6PD;GALNS;GAPDH5;GBA;GCK;GIT2;GLB1;GLMN;GLUL;GLYR1;GM2A;GMIP;GNA11;GNA12;GNA15;GNAI2;GNAL;GNAS;GNAT2;GNB1;GNB5;GNS;GSK3

B1;LRRK1;MAP1S;MAP3K5;MAX;MTERFD3;MYD88;MYH9;NACC2;NAGA;NFKB1;NFKBIA;NLR4;NME1;NR2C1;NRBP1;PAFAH1B1;PAK1;PCYT1A;PDCD6;PEX7;PIP4K2C;PLEK;PLOD1;PRKRA;PVRL1;PYGL;RAB11FIP4;RAF1;RIPK1;SETMAR;SLC11A1;SOD1;SPATA24;SPPL3;SQSTM1;SRC;SRF;SRGAP2;STAT6;STK4;SI  
CBX6;CC2D2A;CCNK;CCRN4L;CD3D;CDC42;CDC5L;CDH1;CENPH;CFAR;CHD8;CHRN1;CHRN2;CLIP2;CLPX;CLTA;CLTC;CLTCL1;CNOT1;COG8;COPA;COPB2;COPS5;COPS8;COP22;COX6A1;CPSF7;CREBBP;CRNKL1;CSF1;CSF1R;CSF2RB;CSNK1D;CSNK2A1;CTDP1;CTNNA1;CTNNB1;CWC15;CYB5R3;CYFIP1;DAB;

IC42;CDC5L;CDH1;CENPH;CLAR;CHD8;CHRN1;CHRN2;CLIP2;CLPX;CLTA;CLTC;CLTCL1;COG8;COPA;COPB2;COP57A;COPS8;COP22;COX6A1;CPSF7;CREBBP;CSF1;CSF1R;CSF2RB;CSNK1D;CSNK2A1;CTDP1;CTNNA1;CTNNA1B;CYB5R3;CYFIP1;DAB2;DAG1;DISC1;DNAH17;DNM2;DSCR3;DYNLL1;DYNLL2;EID3;EITCH1;NOTCH2;OSBP;PSEN1;QSOX1;RAB36;RAC1;RNF24;SEC16A;SEC23B;SLC35A2;SLC9A8;SPPL3;ST3GAL2;STX18;TAPBP;TLR9;TMEM132A;WIP1;XYLT1;ZDHHHC

4;MRPS21;MRPS35;MTERFD3;NDUFA12;NDUFA7;NDUFAB1;NDUF4;NDUFB2;NDUFC1;NDUFS3;NDUFV2;NLRX1;OCIAD2;PHB2;PINK1;PMPCB;PPA2;PSEN1;PTPMT1;RAF1;RNF185;ROMO1;SDHC;SIRT4;SLC25A14;SLC25A26;SLC25A33;SLC25A44;SNN;SOD1;SRC;TFB2M;TIMM8A;TIMM9;TK2;TMEM14C;TO

NDEL1;NDRG1;NEK6;NME1;PACSIN2;PAFAH1B1;PXN;RCS1;RHOA;SBDS;SPTB;SSH1;SSH2;SVIL;TLN1;TMEM67;TMSB10;TMSB15B;TNNC1;TPM3;TPM4;TRIOBP;TTLL4;VASP;VCL;WAS;WASF2;WIPF2;YWHF

BP1A;FSCN1;FZD1;GAS7;GLI1;GLUL;GNA12;GNAS;GNAT2;GNB1;GPRIN1;GSN;GTF2I;HAX1;HCK;IFT46;IGF1R;IQCB1;ITGA5;ITSN1;KATNA1;KCNC3;KCND1;KIAA1598;KIF1B;LAMP1;LCP1;LIMK1;LIN7B;LOXHD1;LRFN1;LZTS1;MAGI2;MAP1S;MAP2K1;MAPRE1;MAX;MBP;MERTK;MPP1;MSN;MTMR14;MYH9;MYO10;NDUFB2;NDUFC1;NDUFS3;NDUFV2;NLRP6;NLRX1;NUP35;NUP98;NUPL2;NXT1;OCIAD2;P2RX1;PAFAH1B1;PAK1;PDCD6;PHB2;PINK1;PMPCB;PSEN1;PTPMT1;RAC2;RAF1;RCC1;RNF185;ROMO1;RRP12;RTN4;SDHC;SLC11A1;SLC25A14;SLC25A26;SLC25A33;SLC25A44;SNN;SP140;SRC;TIMM8A;TIMM9;TK2;T

;PBX2;PHF12;PHF21A;PKNOX1;POLE4;POLR2A;POLR3F;POU5F1;PRKDC;RBM8A;RCOR1;RERE;RNF34;RPAIN;RPRD2;RTF1;SAP130;SETD1B;SIN3A;SKI;SMAD9;SPEN;SRP54;SRSF2;SRSF4;SUPT3H;TADA2B;TAF11;TAF4;TBL1X;THRAP3;TOE1;TOP3A;TP53INP2;TRIM27;TRIM8;UBAP2L;UBN1;USP22;WDR61;WDR62

;TMAR;SLC11A1;SOD1;SPATA24;SPPL3;SQSTM1;SRF;SRGAP2;STK4;SUMF1;TGFB1;TIMM9;TIRAP;TKT;TNNC1;TPD52L2;TRIM8;XPA;ZNF1

4P14;NDST1;NDST2;NOTCH1;NOTCH2;NSFL1C;OSBP;PACS1;PSEN1;QSOX1;RAB36;RAC1;RNF24;SEC16A;SEC23B;SLC35A2;SLC9A8;SPG21;SPPL3;ST3GAL2;STX18;SULF2;TAPBP;TGFB1;TLR9;TMEM132A;VCAN;WIP1;XYLT1;ZDHHHC3;ZFYVI

1;TAF4;TBL1X;TCF20;TFB2M;THRAP3;TRERF1;TSG101;USP22;YWHAB;Y

FC1;NDUFS3;NDUFV2;NLRP6;NLRX1;NUP35;NUP98;NUPL2;NXT1;OC1AD2;PAFAH1B1;PAK1;PDCD6;PHB2;PINK1;PMPCB;PSEN1;PTPMT1;RAC2;RAF1;RCC1;RNF185;ROMO1;RRP12;RTN4;SDHC;SLC25A14;SLC25A26;SLC25A33;SLC25A44;SNN;SP140;SRC;TIMM8A;TIMM9;TK2;TMEM14C;TMEM18;TMEM38A;

4;SLC25A26;SLC25A33;SLC25A44;SNN;SRC;TIMM8A;TIMM9;TK2;TMEM14C;TOMM22;TOMM7;TTC19;TXNIP;UQCR10;UQCR11;USMG  
FRSF18;TP53BP2;TPD52L2;TRAIP;TRAPPC2;YWHAB;ZFYVE

H;MAN2A2;MAN2B2;MARCH8;MEFV;MGRN1;MICAL2;MLL2;MMP14;MMP25;MMP9;MT1E;MTF1;NANOS1;NBR1;NR2C1;NSD1;NUPL2;P2RX1;PAPLN;PHF12;PHF2;PHF21A;PHF23;PHF8;PIAS3;PLAGL2;PMPCB;PPP1R10;PRKCB;PTPN1;PXN;RBM20;RBM22;RERE;RFFL;RNF114;RNF122;RNF14;RNF167;RNF17C

SLC25A44;SNN;SRC;TIMM8A;TIMM9;TK2;TMEM14C;TOMM22;TOMM7;TTC19;UQCR10;UQCR11;USMG

1;TAF4;TBL1X;TCF20;TFB2M;THRAP3;TRERF1;TSG101;USP22;YWHAB;Y

;TRERF1;TSG101;USP22;YWHAB;Y

;HIVEP3;IKZF1;ING4;ISCU;KAT6A;KAT7;KDM2A;KDM4B;KDM5B;KLF13;KLF4;KLF7;KLF9;KPNB1;LASP1;LIMK1;LIMK2;LOC440434;LOXL3;LTA4H;MAN2A2;MAN2B2;MARCH8;MEFV;MGRN1;MICAL2;MLL2;MMP14;MMP25;MMP9;MT1E;MTF1;NANOS1;NBR1;NR2C1;NSD1;NUDT7;NUPL2;P2RX1;PAPLN;PHF12;  
AP2K1;MSN;MYH9;NAF1;NDRG1;NEU1;PAK1;PECAM1;PNMA1;PPL;PRKCD;PTK2B;PTPRJ;PVR;PVRL1;PXN;RHOA;RPH3A;SH3KBP1;SH3PXD2B;SIPA1L1;SNAP29;SRGAP2;STARD8;STRAP;SV2B;SVIL;SYT2;TBC1D2;TJP2;TLN1;TNS3;TPRG1L;TRIM25;UBN1;VAMP2;VASP;VCL;YWHAH;ZY





AD;ALDH18A1;ALDH1B1;ALDH3A2;ALDH5A1;ALDH6A1;ALDH7A1;ALG8;ALG9;ALMS1;ALX3;AMACR;AMFR;AMZ1;ANAPC1;ANAPC13;ANAPCS;ANAPC7;ANK3;ANKLE2;APBA1;APBA2;APBB1;APOBEC3F;APOL3;APOLD1;AQR;ARG1;ARHGAP15;ARHGAP29;ARHGAP35;ARHGFE16;ARHGFE5;ARHGFE6;ARHGFE7;A  
C1;ASMT;ASPDH;ASXL1;ATF6B;ATIC;ATM;ATN1;ATP1A1;ATP1A3;ATP2A2;ATP2A3;ATP5A1;ATP5B;ATP5J;ATP5J2;ATP6V1H;ATP8B1;ATP8B2;ATXN1;AXIN2;BACE1;BACH2;BAD;BAHD1;BATF;BATF3;BAZ1B;BCL10;BCL11B;BCL9L;BEX1;BICD1;BLM;BMP2;BPTF;BRD2;BRD7;BRPF1;BTRC;C14orf16  
P1L;CREB3L2;CREM;CRY2;CSRNP2;CTSF1;CTSF2;CTSF3;CTC1;CTCF;CXXC5;DARS2;DBF4B;DDB1;DDIT3;DDX10;DDX17;DDX18;DDX19B;DDX20;DDX23;DDX24;DDX27;DDX31;DDX42;DDX46;DDX47;DDX51;DDX52;DDX55;DDX56;DDX6;DFFB;DHX15;DHX16;DHX33;DHX35;DHX37;DHX38;DHX57;DHX9;E  
A;AKT2;AKT3;ALAD;ALDH18A1;ALDH5A1;ALDH3A2;ALDH6A1;ALDH7A1;ALG8;ALG9;ALMS1;ALX3;AMACR;AMBRA1;AMFR;AMZ1;ANAPC1;ANAPC13;ANAPCS;ANAPC7;ANK3;ANKLE2;APBA1;APBA2;APBB1;APOBEC3F;APOL3;APOLD1;AQR;ARG1;ARHGAP15;ARHGAP29;ARHGAP35;ARHGFE16;ARHGFE5;ARHGFE6;ARHGFE7;A

A2;ANXA6;AP2B1;AP3S1;APBA1;APBA2;APBB1;APOBEC3F;ARHGAP17;ARHGAP32;ARHGAP33;ARHGFE1;ARHGFE16;ARHGFE4;ARHGFE5;ARHGFE6;ARHGFE7;ARID1B;ARIH2;ARL3;ARNTL2;ARPC2;ARPC3;ASB16;ASMT;ASXL1;ATG13;ATG14;ATG3;ATIC;ATM;ATN1;ATOX1;ATP10A;ATP1A1;ATP2A2;ATP5A1;ATP5B;ATP6  
C3D3;CALR;CAMTA2;CAND2;CAPN2;CAPN3;CARD11;CASP1;CASP2;CBFA2T2;CBX2;CBX5;CBX7;CCAR1;CCDC88C;CCN1;CD3EAP;CDH13;CDK5RAP2;CDKAL1;CDKN2A;CDKN2B;CDON;CELF1;CELSR2;CHCHD3;CHD2;CHD3;CHD4;CHD6;CHEK2;CIAO1;CIC;CIITA;CIRBP;CIRH1A;CLEC3B;CLK2;CMKLR1;CNOT10;COG  
HNRNP;HNRNP;HNRNP;HSPA8;INTS1;INTS4;INTS7;INTS9;KARS;KHDRBS1;KHSRP;KIAA1429;LARP7;LAS1L;LEO1;LOC100130932;LSM10;MAGOH;MLH1;MRPL44;MTPAP;NOL9;NOLC1;NONO;NOP10;NOP14;NSUN2;NSUN4;PAZG4;PABPC1;PABPC4;PAN2;PARN;PCDC11;PHRF1;PNN;POLR2B;POLR2C;POLI

DHX33;DHX35;DHX37;DHX38;DHX57;DHX9;DNAH1;DYNC1H1;EIF4A3;ERCC3;FBXO18;G3BP1;HELH;HSPA8;HSPD1;INO80;LONP2;MACF1;MCM4;MCM6;MDN1;MLH1;MSH6;MYO18A;MYO1D;MYO1E;MYO9B;PCYOX1;PMS2;PMS2P5;PMSCA4;PMSD6;RAD51D;RBBP4;RFC1;SMARCA4;SMARCAL1;SNRNP200;SL  
1;AQR;ARG1;ARHGAP35;ARID1B;ARIH2;ARNTL2;ASB1;ASB16;ASCC1;ASMT;ASXL1;ATF6B;ATG10;ATG3;ATM;ATN1;ATP8B1;ATXN1;AVPR2;AXIN1;AXIN2;B3GALT4;BACE1;BACH2;BAG3;BAHD1;BATF;BATF3;BAZ1B;BBS2;BCL10;BCL11B;BCL2;BCL9L;BEX1;BICD1;BIRC6;BLM;BLMH;BLOC1S1;BMP2;BPTF;BRD1  
PA3;HSPA8;HSPA9;IKBKAP;ILF2;ILF3;IPOS;ITPR3;KDM2B;KDM4A;LBH;LEO1;MDN1;MED27;MPHOSPH8;MYBBP1A;MYC;MYO1C;NAT10;NCL;NF2;NFATC3;NOL10;NOL11;NOL9;NOLC1;NOM1;NONO;NOP10;NOP14;NSUN2;PAZG4;PARN;PARP1;PCDC11;PINX1;PNO1;POLA1;POLR1A;POLR1B;POP1;PSPC1;PTB  
F;CCT3;CCT5;CCT6A;CCT7;CCT8;CD3EAP;CDC16;CDC25B;CDC42BP4;CDC42BPB;CDC42BPB;CDH23;CDK5RAP2;CDKN2A;CENPN;CENPO;CEP104;CEP164;CEP72;CEP85;CEP89;CHD3;CHD4;CHEK2;CIAO1;CIRBP;CIRH1A;CIT;CKAP5;CLEC3B;CNTRL;CORO2A;CROCC;CSTB;CTC1;CTCF;CTR9;DCLK2;DCTN1;DCTN5;E  
F;CCT3;CCT5;CCT6A;CCT7;CCT8;CD3EAP;CDC16;CDC25B;CDC42BP4;CDC42BPB;CDC42BPB;CDH23;CDK5RAP2;CDKN2A;CENPN;CENPO;CEP104;CEP164;CEP72;CEP85;CEP89;CHD3;CHD4;CHEK2;CIAO1;CIRBP;CIRH1A;CIT;CKAP5;CLEC3B;CNTRL;CORO2A;CROCC;CSTB;CTC1;CTCF;CTR9;DCLK2;DCTN1;DCTN5;E  
DHX9;DYNC1H1;EIF4A3;ERCC3;FBXO18;G3BP1;HELH;HSPA8;LONP2;MCM4;MCM6;MSH6;MYO18A;MYO1D;MYO1E;PCYOX1;RAD51D;RBBP4;RFC1;SMARCA4;SMARCAL1;SNRNP200;USP3V1L;TOP2B;XRCC3;XRCC5;XRC

VT1;CD3EAP;CDH13;CDK5RAP2;CDKAL1;CDKN2A;CDKN2B;CDON;CELF1;CELSR2;CHCHD3;CHD2;CHD3;CHD4;CHD6;CHEK2;CIAO1;CIC;CIITA;CIRBP;CIRH1A;CLK2;CMKLR1;CNOT10;CPSF3;CREB3L2;CREG1;CREM;CRTCI;CRTCS;CRY2;CSNK2A2;CSRNP2;CTSF1;CTSF2;CTSF3;CTCF;CTNBNL1;CTR9;CYT11;DARS2;DBR1;DC  
AP9;AKNA;AKT2;AKT3;ALAD;ALDH18A1;ALDH3A2;ALDH5A1;ALDH6A1;ALDH7A1;ALG8;ALG9;ALMS1;ALS2C1;ALX3;AMACR;AMBRA1;AMFR;AMZ1;ANAPC1;ANAPC13;ANAPCS;ANAPC7;ANK3;ANKLE2;ANKRD27;ANXA2;AP2B1;AP3D1;AP3S1;APBA1;APBA2;APBB1;APOBEC3F;APOL3;APO  
6V1H;AXIN1;BAD;BAG3;BAIAP2L1;BCL10;BCL2;BICD1;BID;BLMH;BLOC1S1;BTRC;C2CD2;C9orf89;CABP4;CAD;CALM3;CALR;CAMP;CAPN3;CARD11;CASP1;CASP10;CASP2;CBLB;CCND1;CCND2;CCT3;CCT5;CCT6A;CCT7;CCT8;CDC16;CDC25B;CDK5RAP2;CDKN2A;CDKN2B;CENPN;CENPO;CEP164;CEP72;CHMP4  
A;EIF5B;ELAVL1;EPRS;EXOSC10;FAM103A1;FARSB;FIP1L1;FUBP1;G3BP1;GAR1;GCN1L1;GEMIN3;GEM1;HEXIM1;HNRNP40;HNRNP42;HNRNP43;HNRNP4B;HNRNP4C;HNRNP4D;HNRNP4E;HNRNP4F;HNRNP4G;HNRNP4H;HNRNP4I;HNRNP4J;HNRNP4K;HNRNP4L;HNRNP4M;HNRNP4N;HNRNP4O;HNRNP4P;HNRNP4Q;HNRNP4R;HNRNP4S;HNRNP4T;HNRNP4U;HNRNP4V;HNRNP4W;HNRNP4X;HNRNP4Y;HNRNP4Z;HNRNP4AA;HNRNP4AB;HNRNP4AC;HNRNP4AD;HNRNP4AE;HNRNP4AF;HNRNP4AG;HNRNP4AH;HNRNP4AI;HNRNP4AJ;HNRNP4AK;HNRNP4AL;HNRNP4AM;HNRNP4AN;HNRNP4AO;HNRNP4AP;HNRNP4AQ;HNRNP4AR;HNRNP4AS;HNRNP4AT;HNRNP4AU;HNRNP4AV;HNRNP4AW;HNRNP4AX;HNRNP4AY;HNRNP4AZ;HNRNP4BA;HNRNP4BB;HNRNP4BC;HNRNP4BD;HNRNP4BE;HNRNP4BF;HNRNP4BG;HNRNP4BH;HNRNP4BI;HNRNP4BJ;HNRNP4BK;HNRNP4BL;HNRNP4BM;HNRNP4BN;HNRNP4BO;HNRNP4BP;HNRNP4BQ;HNRNP4BR;HNRNP4BS;HNRNP4BT;HNRNP4BU;HNRNP4BV;HNRNP4BW;HNRNP4BX;HNRNP4BY;HNRNP4BZ;HNRNP4CA;HNRNP4CB;HNRNP4CC;HNRNP4CD;HNRNP4CE;HNRNP4CF;HNRNP4CG;HNRNP4CH;HNRNP4CI;HNRNP4CJ;HNRNP4CK;HNRNP4CL;HNRNP4CM;HNRNP4CN;HNRNP4CO;HNRNP4CP;HNRNP4CQ;HNRNP4CR;HNRNP4CS;HNRNP4CT;HNRNP4CU;HNRNP4CV;HNRNP4CW;HNRNP4CX;HNRNP4CY;HNRNP4CZ;HNRNP4DA;HNRNP4DB;HNRNP4DC;HNRNP4DD;HNRNP4DE;HNRNP4DF;HNRNP4DG;HNRNP4DH;HNRNP4DI;HNRNP4DJ;HNRNP4DK;HNRNP4DL;HNRNP4DM;HNRNP4DN;HNRNP4DO;HNRNP4DP;HNRNP4DQ;HNRNP4DR;HNRNP4DS;HNRNP4DT;HNRNP4DU;HNRNP4DV;HNRNP4DW;HNRNP4DX;HNRNP4DY;HNRNP4DZ;HNRNP4EA;HNRNP4EB;HNRNP4EC;HNRNP4ED;HNRNP4EE;HNRNP4EF;HNRNP4EG;HNRNP4EH;HNRNP4EI;HNRNP4EJ;HNRNP4EK;HNRNP4EL;HNRNP4EM;HNRNP4EN;HNRNP4EO;HNRNP4EP;HNRNP4EQ;HNRNP4ER;HNRNP4ES;HNRNP4ET;HNRNP4EU;HNRNP4EV;HNRNP4EW;HNRNP4EX;HNRNP4EY;HNRNP4EZ;HNRNP4FA;HNRNP4FB;HNRNP4FC;HNRNP4FD;HNRNP4FE;HNRNP4FF;HNRNP4FG;HNRNP4FH;HNRNP4FI;HNRNP4FJ;HNRNP4FK;HNRNP4FL;HNRNP4FM;HNRNP4FN;HNRNP4FO;HNRNP4FP;HNRNP4FQ;HNRNP4FR;HNRNP4FS;HNRNP4FT;HNRNP4FU;HNRNP4FV;HNRNP4FW;HNRNP4FX;HNRNP4FY;HNRNP4FZ;HNRNP4GA;HNRNP4GB;HNRNP4GC;HNRNP4GD;HNRNP4GE;HNRNP4GF;HNRNP4GG;HNRNP4GH;HNRNP4GI;HNRNP4GJ;HNRNP4GK;HNRNP4GL;HNRNP4GM;HNRNP4GN;HNRNP4GO;HNRNP4GP;HNRNP4GQ;HNRNP4GR;HNRNP4GS;HNRNP4GT;HNRNP4GU;HNRNP4GV;HNRNP4GW;HNRNP4GX;HNRNP4GY;HNRNP4GZ;HNRNP4HA;HNRNP4HB;HNRNP4HC;HNRNP4HD;HNRNP4HE;HNRNP4HF;HNRNP4HG;HNRNP4HH;HNRNP4HI;HNRNP4HJ;HNRNP4HK;HNRNP4HL;HNRNP4HM;HNRNP4HN;HNRNP4HO;HNRNP4HP;HNRNP4HQ;HNRNP4HR;HNRNP4HS;HNRNP4HT;HNRNP4HU;HNRNP4HV;HNRNP4HW;HNRNP4HX;HNRNP4HY;HNRNP4HZ;HNRNP4IA;HNRNP4IB;HNRNP4IC;HNRNP4ID;HNRNP4IE;HNRNP4IF;HNRNP4IG;HNRNP4IH;HNRNP4II;HNRNP4IJ;HNRNP4IK;HNRNP4IL;HNRNP4IM;HNRNP4IN;HNRNP4IO;HNRNP4IP;HNRNP4IQ;HNRNP4IR;HNRNP4IS;HNRNP4IT;HNRNP4IU;HNRNP4IV;HNRNP4IW;HNRNP4IX;HNRNP4IY;HNRNP4IZ;HNRNP4JA;HNRNP4JB;HNRNP4JC;HNRNP4JD;HNRNP4JE;HNRNP4JF;HNRNP4JG;HNRNP4JH;HNRNP4JI;HNRNP4JJ;HNRNP4JK;HNRNP4JL;HNRNP4JM;HNRNP4JN;HNRNP4JO;HNRNP4JP;HNRNP4JQ;HNRNP4JR;HNRNP4JS;HNRNP4JT;HNRNP4JU;HNRNP4JV;HNRNP4JW;HNRNP4JX;HNRNP4JY;HNRNP4JZ;HNRNP4KA;HNRNP4KB;HNRNP4KC;HNRNP4KD;HNRNP4KE;HNRNP4KF;HNRNP4KG;HNRNP4KH;HNRNP4KI;HNRNP4KJ;HNRNP4KL;HNRNP4KM;HNRNP4KN;HNRNP4KO;HNRNP4KP;HNRNP4KQ;HNRNP4KR;HNRNP4KS;HNRNP4KT;HNRNP4KU;HNRNP4KV;HNRNP4KW;HNRNP4KX;HNRNP4KY;HNRNP4KZ;HNRNP4LA;HNRNP4LB;HNRNP4LC;HNRNP4LD;HNRNP4LE;HNRNP4LF;HNRNP4LG;HNRNP4LH;HNRNP4LI;HNRNP4LJ;HNRNP4LK;HNRNP4LM;HNRNP4LN;HNRNP4LO;HNRNP4LP;HNRNP4LQ;HNRNP4LR;HNRNP4LS;HNRNP4LT;HNRNP4LU;HNRNP4LV;HNRNP4LW;HNRNP4LX;HNRNP4LY;HNRNP4LZ;HNRNP4MA;HNRNP4MB;HNRNP4MC;HNRNP4MD;HNRNP4ME;HNRNP4MF;HNRNP4MG;HNRNP4MH;HNRNP4MI;HNRNP4MJ;HNRNP4MK;HNRNP4ML;HNRNP4MM;HNRNP4MN;HNRNP4MO;HNRNP4MP;HNRNP4MQ;HNRNP4MR;HNRNP4MS;HNRNP4MT;HNRNP4MU;HNRNP4MV;HNRNP4MW;HNRNP4MX;HNRNP4MY;HNRNP4MZ;HNRNP4NA;HNRNP4NB;HNRNP4NC;HNRNP4ND;HNRNP4NE;HNRNP4NF;HNRNP4NG;HNRNP4NH;HNRNP4NI;HNRNP4NJ;HNRNP4NK;HNRNP4NL;HNRNP4NM;HNRNP4NO;HNRNP4NP;HNRNP4NQ;HNRNP4NR;HNRNP4NS;HNRNP4NT;HNRNP4NU;HNRNP4NV;HNRNP4NW;HNRNP4NX;HNRNP4NY;HNRNP4NZ;HNRNP4OA;HNRNP4OB;HNRNP4OC;HNRNP4OD;HNRNP4OE;HNRNP4OF;HNRNP4OG;HNRNP4OH;HNRNP4OI;HNRNP4OJ;HNRNP4OK;HNRNP4OL;HNRNP4OM;HNRNP4ON;HNRNP4OO;HNRNP4OP;HNRNP4OQ;HNRNP4OR;HNRNP4OS;HNRNP4OT;HNRNP4OU;HNRNP4OV;HNRNP4OW;HNRNP4OX;HNRNP4OY;HNRNP4OZ;HNRNP4PA;HNRNP4PB;HNRNP4PC;HNRNP4PD;HNRNP4PE;HNRNP4PF;HNRNP4PG;HNRNP4PH;HNRNP4PI;HNRNP4PJ;HNRNP4PK;HNRNP4PL;HNRNP4PM;HNRNP4PN;HNRNP4PO;HNRNP4PP;HNRNP4PQ;HNRNP4PR;HNRNP4PS;HNRNP4PT;HNRNP4PU;HNRNP4PV;HNRNP4PW;HNRNP4PX;HNRNP4PY;HNRNP4PZ;HNRNP4QA;HNRNP4QB;HNRNP4QC;HNRNP4QD;HNRNP4QE;HNRNP4QF;HNRNP4QG;HNRNP4QH;HNRNP4QI;HNRNP4QJ;HNRNP4QK;HNRNP4QL;HNRNP4QM;HNRNP4QN;HNRNP4QO;HNRNP4QP;HNRNP4QQ;HNRNP4QR;HNRNP4QS;HNRNP4QT;HNRNP4QU;HNRNP4QV;HNRNP4QW;HNRNP4QX;HNRNP4QY;HNRNP4QZ;HNRNP4RA;HNRNP4RB;HNRNP4RC;HNRNP4RD;HNRNP4RE;HNRNP4RF;HNRNP4RG;HNRNP4RH;HNRNP4RI;HNRNP4RJ;HNRNP4RK;HNRNP4RL;HNRNP4RM;HNRNP4RN;HNRNP4RO;HNRNP4RP;HNRNP4RQ;HNRNP4RR;HNRNP4RS;HNRNP4RT;HNRNP4RU;HNRNP4RV;HNRNP4RW;HNRNP4RX;HNRNP4RY;HNRNP4RZ;HNRNP4SA;HNRNP4SB;HNRNP4SC;HNRNP4SD;HNRNP4SE;HNRNP4SF;HNRNP4SG;HNRNP4SH;HNRNP4SI;HNRNP4SJ;HNRNP4SK;HNRNP4SL;HNRNP4SM;HNRNP4SN;HNRNP4SO;HNRNP4SP;HNRNP4SQ;HNRNP4SR;HNRNP4SS;HNRNP4ST;HNRNP4SU;HNRNP4SV;HNRNP4SW;HNRNP4SX;HNRNP4SY;HNRNP4SZ;HNRNP4TA;HNRNP4TB;HNRNP4TC;HNRNP4TD;HNRNP4TE;HNRNP4TF;HNRNP4TG;HNRNP4TH;HNRNP4TI;HNRNP4TJ;HNRNP4TK;HNRNP4TL;HNRNP4TM;HNRNP4TN;HNRNP4TO;HNRNP4TP;HNRNP4TP2;HNRNP4TP3;HNRNP4TP4;HNRNP4TP5;HNRNP4TP6;HNRNP4TP7;HNRNP4TP8;HNRNP4TP9;HNRNP4TPA;HNRNP4TPB;HNRNP4TPC;HNRNP4TPD;HNRNP4TPE;HNRNP4TPF;HNRNP4TPG;HNRNP4TPH;HNRNP4TPI;HNRNP4TPJ;HNRNP4TPK;HNRNP4TPL;HNRNP4TPM;HNRNP4TPN;HNRNP4TPO;HNRNP4TPP;HNRNP4TPQ;HNRNP4TPR;HNRNP4TPS;HNRNP4TPT;HNRNP4TPU;HNRNP4TPV;HNRNP4TPW;HNRNP4TPX;HNRNP4TPY;HNRNP4TPZ;HNRNP4UA;HNRNP4UB;HNRNP4UC;HNRNP4UD;HNRNP4UE;HNRNP4UF;HNRNP4UG;HNRNP4UH;HNRNP4UI;HNRNP4UJ;HNRNP4UK;HNRNP4UL;HNRNP4UM;HNRNP4UN;HNRNP4UO;HNRNP4UP;HNRNP4UQ;HNRNP4UR;HNRNP4US;HNRNP4UT;HNRNP4UU;HNRNP4UV;HNRNP4UW;HNRNP4UX;HNRNP4UY;HNRNP4UZ;HNRNP4VA;HNRNP4VB;HNRNP4VC;HNRNP4VD;HNRNP4VE;HNRNP4VF;HNRNP4VG;HNRNP4VH;HNRNP4VI;HNRNP4VJ;HNRNP4VK;HNRNP4VL;HNRNP4VM;HNRNP4VN;HNRNP4VO;HNRNP4VP;HNRNP4VQ;HNRNP4VR;HNRNP4VS;HNRNP4VT;HNRNP4VU;HNRNP4VV;HNRNP4VW;HNRNP4VX;HNRNP4VY;HNRNP4VZ;HNRNP4WA;HNRNP4WB;HNRNP4WC;HNRNP4WD;HNRNP4WE;HNRNP4WF;HNRNP4WG;HNRNP4WH;HNRNP4WI;HNRNP4WJ;HNRNP4WK;HNRNP4WL;HNRNP4WM;HNRNP4WN;HNRNP4WO;HNRNP4WP;HNRNP4WQ;HNRNP4WR;HNRNP4WS;HNRNP4WT;HNRNP4WU;HNRNP4WV;HNRNP4WW;HNRNP4WX;HNRNP4WY;HNRNP4WZ;HNRNP4XA;HNRNP4XB;HNRNP4XC;HNRNP4XD;HNRNP4XE;HNRNP4XF;HNRNP4XG;HNRNP4XH;HNRNP4XI;HNRNP4XJ;HNRNP4XK;HNRNP4XL;HNRNP4XM;HNRNP4XN;HNRNP4XO;HNRNP4XP;HNRNP4XQ;HNRNP4XR;HNRNP4XS;HNRNP4XT;HNRNP4XU;HNRNP4XV;HNRNP4XW;HNRNP4XZ;HNRNP4YA;HNRNP4YB;HNRNP4YC;HNRNP4YD;HNRNP4YE;HNRNP4YF;HNRNP4YG;HNRNP4YH;HNRNP4YI;HNRNP4YJ;HNRNP4YK;HNRNP4YL;HNRNP4YM;HNRNP4YN;HNRNP4YO;HNRNP4YP;HNRNP4YQ;HNRNP4YR;HNRNP4YS;HNRNP4YT;HNRNP4YU;HNRNP4YV;HNRNP4YW;HNRNP4YX;HNRNP4YY;HNRNP4YZ;HNRNP4ZA;HNRNP4ZB;HNRNP4ZC;HNRNP4ZD;HNRNP4ZE;HNRNP4ZF;HNRNP4ZG;HNRNP4ZH;HNRNP4ZI;HNRNP4ZJ;HNRNP4ZK;HNRNP4ZL;HNRNP4ZM;HNRNP4ZN;HNRNP4ZO;HNRNP4ZP;HNRNP4ZQ;HNRNP4ZR;HNRNP4ZS;HNRNP4ZT;HNRNP4ZU;HNRNP4ZV;HNRNP4ZW;HNRNP4ZX;HNRNP4ZY;HNRNP4ZZ;HNRNP4AAA;HNRNP4AAB;HNRNP4AAC;HNRNP4AAD;HNRNP4AAE;HNRNP4AAF;HNRNP4AAG;HNRNP4AAH;HNRNP4AAI;HNRNP4AAJ;HNRNP4AAK;HNRNP4AAL;HNRNP4AAM;HNRNP4AAN;HNRNP4AAO;HNRNP4AAP;HNRNP4AAQ;HNRNP4AAR;HNRNP4AAS;HNRNP4AAT;HNRNP4AAU;HNRNP4AAV;HNRNP4AAW;HNRNP4AAX;HNRNP4AAY;HNRNP4AAZ;HNRNP4ABA;HNRNP4ABB;HNRNP4ABC;HNRNP4ABD;HNRNP4ABE;HNRNP4ABF;HNRNP4ABG;HNRNP4ABH;HNRNP4ABI;HNRNP4ABJ;HNRNP4ABK;HNRNP4ABL;HNRNP4ABM;HNRNP4ABN;HNRNP4ABO;HNRNP4ABP;HNRNP4ABQ;HNRNP4ABR;HNRNP4ABS;HNRNP4ABT;HNRNP4ABU;HNRNP4ABV;HNRNP4ABW;HNRNP4ABX;HNRNP4ABY;HNRNP4ABZ;HNRNP4ABA;HNRNP4ABB;HNRNP4ABC;HNRNP4ABD;HNRNP4ABE;HNRNP4ABF;HNRNP4ABG;HNRNP4ABH;HNRNP4ABI;HNRNP4ABJ;HNRNP4ABK;HNRNP4ABL;HNRNP4ABM;HNRNP4ABN;HNRNP4ABO;HNRNP4ABP;HNRNP4ABQ;HNRNP4ABR;HNRNP4ABS;HNRNP4ABT;HNRNP4ABU;HNRNP4ABV;HNRNP4ABW;HNRNP4ABX;HNRNP4ABY;HNRNP4ABZ;HNRNP4ABA;HNRNP4ABB;HNRNP4ABC;HNRNP4ABD;HNRNP4ABE;HNRNP4ABF;HNRNP4ABG;HNRNP4ABH;HNRNP4ABI;HNRNP4ABJ;HNRNP4ABK;HNRNP4ABL;HNRNP4ABM;HNRNP4ABN;HNRNP4ABO;HNRNP4ABP;HNRNP4ABQ;HNRNP4ABR;HNRNP4ABS;HNRNP4ABT;HNRNP4ABU;HNRNP4ABV;HNRNP4ABW;HNRNP4ABX;HNRNP4ABY;HNRNP4ABZ;HNRNP4ABA;HNRNP4ABB;HNRNP4ABC;HNRNP4ABD;HNRNP4ABE;HNRNP4ABF;HNRNP4ABG;HNRNP4ABH;HNRNP4ABI;HNRNP4ABJ;HNRNP4ABK;HNRNP4ABL;HNRNP4ABM;HNRNP4ABN;HNRNP4ABO;HNRNP4ABP;HNRNP4ABQ;HNRNP4ABR;HNRNP4ABS;HNRNP4ABT;HNRNP4ABU;HNRNP4ABV;HNRNP4ABW;HNRNP4ABX;HNRNP4ABY;HNRNP4ABZ;HNRNP4ABA;HNRNP4ABB;HNRNP4ABC;HNRNP4ABD;HNRNP4ABE;HNRNP4ABF;HNRNP4ABG;HNRNP4ABH;HNRNP4ABI;HNRNP4ABJ;HNRNP4ABK;HNRNP4ABL;HNRNP4ABM;HNRNP4ABN;HNRNP4ABO;HNRNP4ABP;HNRNP4ABQ;HNRNP4ABR;HNRNP4ABS;HNRNP4ABT;HNRNP4ABU;HNRNP4ABV;HNRNP4ABW;HNRNP4ABX;HNRNP4ABY;HNRNP4ABZ;HNRNP4ABA;HNRNP4ABB;HNRNP4ABC;HNRNP4ABD;HNRNP4ABE;HNRNP4ABF;HNRNP4ABG;HNRNP4ABH;HNRNP4ABI;HNRNP4ABJ;HNRNP4ABK;HNRNP4ABL;HNRNP4ABM;HNRNP4ABN;HNRNP4ABO;HNRNP4ABP;HNRNP4ABQ;HNRNP4ABR;HNRNP4ABS;HNRNP4ABT;HNRNP4ABU;HNRNP4ABV;HNRNP4ABW;HNRNP4ABX;HNRNP4ABY;HNRNP4ABZ;HNRNP4ABA;HNRNP4ABB;HNRNP4ABC;HNRNP4ABD;HNRNP4ABE;HNRNP4ABF;HNRNP4ABG;HNRNP4ABH;HNRNP4ABI;HNRNP4ABJ;HNRNP4ABK;HNRNP4ABL;HNRNP4ABM;HNRNP4ABN;HNRNP4ABO;HNRNP4ABP;HNRNP4ABQ;HNRNP4ABR;HNRNP4ABS;HNRNP4ABT;HNRNP4ABU;HNRNP4ABV;HNRNP4ABW;HNRNP4ABX;HNRNP4ABY;HNRNP4ABZ;HNRNP4ABA;HNRNP4ABB;HNRNP4ABC;HNRNP4ABD;HNRNP4ABE;HNRNP4ABF;HNRNP4ABG;HNRNP4ABH;HNRNP4ABI;HNRNP4ABJ;HNRNP4ABK;HNRNP4ABL;HNRNP4ABM;HNRNP4ABN;HNRNP4ABO;HNRNP4ABP;HNRNP4ABQ;HNRNP4ABR;HNRNP4ABS;HNRNP4ABT;HNRNP4ABU;HNRNP4ABV;HNRNP4ABW;HNRNP4ABX;HNRNP4ABY;HNRNP4ABZ;HNRNP4ABA;HNRNP4ABB;HNRNP4ABC;HNRNP4ABD;HNRNP4ABE;HNRNP4ABF;HNRNP4ABG;HNRNP4ABH;HNRNP4ABI;HNRNP4ABJ;HNRNP4ABK;HNRNP4ABL;HNRNP4ABM;HNRNP4ABN;HNRNP4ABO;HNRNP4ABP;HNRNP4ABQ;HNRNP4ABR;HNRNP4ABS;HNRNP4ABT;HNRNP4ABU;HNRNP4ABV;HNRNP4ABW;HNRNP4ABX;HNRNP4ABY;HNRNP4ABZ;HNRNP4ABA;HNRNP4ABB;HNRNP4ABC;HNRNP4ABD;HNRNP4ABE;HNRNP4ABF;HNRNP4ABG;HNRNP4ABH;HNRNP4ABI;HNRNP4ABJ;HNRNP4ABK;HNRNP4ABL;HNRNP4ABM;HNRNP4ABN;HNRNP4ABO;HNRNP4ABP;HNRNP4ABQ;HNRNP4ABR;HNRNP4ABS;HNRNP4ABT;HNRNP4ABU;HNRNP4ABV;HNRNP4ABW;HNRNP4ABX;HNRNP4ABY;HNRNP4ABZ;HNRNP4ABA;HNRNP4ABB;HNRNP4ABC;HNRNP4ABD;HNRNP4ABE;HNRNP4ABF;HNRNP4ABG;HNRNP4ABH;HNRNP4ABI;HNRNP4ABJ;HNRNP4ABK;HNRNP4ABL;HNRNP4ABM;HNRNP4ABN;HNRNP4ABO;HNRNP4ABP;HNRNP4ABQ;HNRNP4ABR;HNRNP4ABS;HNRNP4ABT;HNRNP4ABU;HNRNP4ABV;HNRNP4ABW;HNRNP4ABX;HNRNP4ABY;HNRNP4ABZ;HNRNP4ABA;HNRNP4ABB;HNRNP4ABC;HNRNP4ABD;HNRNP4ABE;HNRNP4ABF;HNRNP4ABG;HNRNP4ABH;HNRNP4ABI;HNRNP4ABJ;HNRNP4ABK;HNRNP4ABL;HNRNP4ABM;HNRNP4ABN;HNRNP4ABO;HNRNP4ABP;HNRNP4ABQ;HNRNP4ABR;HNRNP4ABS;HNRNP4ABT;HNRNP4ABU;HNRNP4ABV;HNRNP4ABW;HNRNP4ABX;HNRNP4ABY;HNRNP4ABZ;HNRNP4ABA;HNRNP4ABB;HNRNP4ABC;HNRNP4ABD;HNRNP4ABE;HNRNP4ABF;HNRNP4ABG;HNRNP4ABH;HNRNP4ABI;HNRNP4ABJ;HNRNP4ABK;HNRNP4ABL;HNRNP4ABM;HNRNP4ABN;HNRNP4ABO;HNRNP4ABP;HNRNP4ABQ;HNRNP4ABR;HNRNP4ABS;HNRNP4ABT;HNRNP4ABU;HNRNP4ABV;HNRNP4ABW;HNRNP4ABX;HNRNP4ABY;HNRNP4ABZ;HNRNP4ABA;HNRNP4ABB;HNRNP4ABC;HNRNP4ABD;HNRNP4ABE;HNRNP4ABF;HNRNP4ABG;HNRNP4ABH;HNRNP4ABI;HNRNP4ABJ;HNRNP4ABK;HNRNP4ABL;HNRNP4ABM;HNRNP4ABN;HNRNP4ABO;HNRNP4ABP;HNRNP4ABQ;HNRNP4ABR;HNRNP4ABS;HNRNP4ABT;HNRNP4ABU;HNRNP4ABV;HNRNP4ABW;HNRNP4ABX;HNRNP4ABY;HNRNP4ABZ;HNRNP4ABA;HNRNP4ABB;HNRNP4ABC;HNRNP4ABD;HNRNP4ABE;HNRNP4ABF;HNRNP4ABG;HNRNP4ABH;HNRNP4ABI;HNRNP4ABJ;HNRNP4ABK;HNRNP4ABL;HNRNP4ABM;HNRNP4ABN;HNRNP4ABO;HNRNP4ABP;HNRNP4ABQ;HNRNP4ABR;HNRNP4ABS;HNRNP4ABT;HNRNP4ABU;HNRNP4ABV;HNRNP4ABW;HNRNP4ABX;HNRNP4ABY;HNRNP4ABZ;HNRNP4ABA;HNRNP4ABB;HNRNP4ABC;HNRNP4ABD;HNRNP4ABE;HNRNP4ABF;HNRNP4ABG;HNRNP4ABH;HNRNP4ABI;HNRNP4ABJ;HNRNP4ABK;HNRNP4ABL;HNRNP4ABM;HNRNP4ABN;HNRNP4ABO;HNRNP4ABP;HNRNP4ABQ;HNRNP4ABR;HNRNP4ABS;HNRNP4ABT;HNRNP4ABU;HNRNP4ABV;HNRNP4ABW;HNRNP4ABX;HNRNP4ABY;HNRNP4ABZ;HNRNP4ABA;HNRNP4ABB;HNRNP4ABC;HNRNP4ABD;HNRNP4ABE;HNRNP4ABF;HNRNP4ABG;HNRNP4ABH;HNRNP4ABI;HNRNP4ABJ;HNRNP4ABK;HNRNP4ABL;HNRNP4ABM;HNRNP4ABN;HNRNP4ABO;HNRNP4ABP;HNRNP4ABQ;HNRNP4ABR;HNRNP4ABS;HNRNP4ABT;HNRNP4ABU;HNRNP4ABV;HNRNP4ABW;HNRNP4ABX;HNRNP4ABY;HNRNP4ABZ;HNRNP4ABA;HNRNP4ABB;HNRNP4ABC;HNRNP4ABD;HNRNP4ABE;HNRNP4ABF;HNRNP4ABG;HNRNP4ABH;HNRNP4ABI;HNRNP4ABJ;HNRNP4ABK;HNRNP4ABL;HNRNP4ABM;HNRNP4ABN;HNRNP4ABO;HNRNP4ABP;HNRNP4ABQ;HNRNP4ABR;HNRNP4ABS;HNRNP4ABT;HNRNP4ABU;HNRNP4ABV;HNRNP4ABW;HNRNP4ABX;HNRNP4ABY;HNRNP4ABZ;HNRNP4ABA;HNRNP4ABB;HNRNP4ABC;HNRNP4ABD;HNRNP4ABE;HNRNP4ABF;HNRNP4ABG;HNRNP4ABH;HNRNP4ABI;HNRNP4ABJ;HNRNP4ABK;HNRNP4ABL;HNRNP4ABM;HNRNP4ABN;HNRNP4ABO;HNRNP4ABP;HNRNP4ABQ;HNRNP4ABR;HNRNP4ABS;HNRNP4ABT;HNRNP4ABU;HNRNP4ABV;HNRNP4ABW;HNRNP4ABX;HNRNP4ABY;HNRNP4ABZ;HNRNP4ABA;HNRNP4ABB;HNRNP4ABC;HNRNP4ABD;HNRNP4ABE;HNRNP4ABF;HNRNP4ABG;HNRNP4ABH;HNRNP4ABI;HNRNP4ABJ;HNRNP4ABK;HNRNP4ABL;HNRNP4ABM;HNRNP4ABN;HNRNP4ABO;HNRNP4ABP;HNRNP4ABQ;HNRNP4ABR;HNRNP4ABS;HNRNP4ABT;HNRNP4ABU;HNRNP4ABV;HNRNP4ABW;HNRNP4ABX;HNRNP4ABY;HNRNP4ABZ;HNRNP4ABA;HNRNP4ABB;HNRNP4ABC;HNRNP4ABD;HNRNP4ABE;HNRNP4ABF;HNRNP4ABG;HNRNP4ABH;HNRNP4ABI;HNRNP4ABJ;HNRNP4ABK;HNRNP4ABL;HNRNP4ABM;HNRNP4ABN;HNRNP4ABO;HNRNP4ABP;HNRNP4ABQ;HNRNP4ABR;HNRNP4ABS;HNRNP4ABT;HNRNP4ABU;HNRNP4ABV;HNRNP4ABW;HNRNP4ABX;HNRNP4ABY;HNRNP4ABZ;HNRNP4ABA;HNRNP4ABB;HNRNP4ABC;HNRNP4ABD;HNRNP4ABE;HNRNP4ABF;HNRNP4ABG;HNRNP4ABH;HNRNP4ABI;HNRNP4ABJ;HNRNP4ABK;HNRNP4ABL;HNRNP4ABM;HNRNP4ABN;HNRNP4ABO;HNRNP4ABP;HNRNP4ABQ;HNRNP4ABR;HNRNP4ABS;HNRNP4ABT;HNRNP4ABU;HNRNP4ABV;HNRNP4ABW;HNRNP4ABX;HNRNP4ABY;HNRNP4ABZ;HNRNP4ABA;HNRNP4ABB;HNRNP4ABC;HNRNP4ABD;HNRNP4ABE;HNRNP4ABF;HNRNP4ABG;HNRNP4ABH;HNRNP4ABI;HNRNP4ABJ;HNRNP4ABK;HNRNP4ABL;HNRNP4ABM;HNRNP4ABN;HNRNP4ABO;HNRNP4ABP;HNRNP4ABQ;HNRNP4ABR;HNRNP4ABS;HNRNP4ABT;HNRNP4ABU;HNRNP4ABV;HNRNP4ABW;HNRNP4ABX;HNRNP4ABY;HNRNP4ABZ;HNRNP4ABA;HNRNP4ABB;HNRNP4ABC;HNRNP4ABD;HNRNP4ABE;HNRNP4ABF;HNRNP4ABG;HNRNP4ABH;HNRNP4ABI;HNRNP4ABJ;HNRNP4ABK;HNRNP4ABL;HNRNP4ABM;HNRNP4ABN;HNRNP4ABO;HNRNP4ABP;HNRNP4ABQ;HNRNP4ABR;HNRNP4ABS;HNRNP4ABT;HNRNP4ABU;HNRNP4ABV;HNRNP4ABW;HNRNP4ABX;HNRNP4ABY;HNRNP4ABZ;HNRNP4ABA;HNRNP4ABB;HNRNP4ABC;HNRNP4ABD;HNRNP4ABE;HNRNP4ABF;HNRNP4ABG;HNRNP4ABH;HNRNP4ABI;HNRNP4ABJ;HNRNP4ABK;HNRNP4ABL;HNRNP4ABM;HNRNP4ABN;HNRNP4ABO;HNRNP4ABP;HNRNP4ABQ;HNRNP4ABR;HNRNP4ABS;HNRNP4ABT;HNRNP4ABU;HNRNP4ABV;HNRNP4ABW;HNRNP4ABX;HNRNP4ABY;HNRNP4ABZ;HNRNP4ABA;HNRNP4ABB;HNRNP4ABC;HNRNP4ABD;HNRNP4ABE;HNRNP4ABF;HNRNP4ABG;HNRNP4ABH;HNRNP4ABI;HNRNP4ABJ;HNRNP4ABK;HNRNP4ABL;HNRNP4ABM;HNRNP4ABN;HNRNP4ABO;HNRNP4ABP;HNRNP4ABQ;HNRNP4ABR;HNRNP4ABS;HNRNP4ABT;HNRNP4ABU;HNRNP4ABV;HNRNP4ABW;HNRNP4ABX;HNRNP4ABY;HNRNP4ABZ;HNRNP4ABA;HNRNP4ABB;HNRNP4ABC;HNRNP4ABD;HNRNP4ABE;HNRNP4ABF;HNRNP4ABG;HNRNP4ABH;HNRNP4ABI;HNRNP4ABJ;HNRNP4ABK;HNRNP4ABL;HNRNP4ABM;HNRNP4ABN;HNRNP4ABO;HNRNP4ABP;HNRNP4ABQ;HNRNP4ABR;HNRNP4ABS

MWD;DST;DTL;DYNC1H1;DYNC1I2;DYNL1;EIF4G2;ERCC3;FEN1;FHL1;FLNA;FOXN1;FZR1;GADD45A;GINS4;HAUS5;HGF;HTRA2;HTT;HYAL1;ILF3;INCENP;ING2;INGS;INO80;INTS7;JTB;KHDRB51;KIF3B;KLF11;KNTC1;KRT7;L3MBTL1;LEF1;LIG1;LIG3;LMLN;LRP5;LSM10;LZTS2;MACF1;MAD2L1BP;MAD2L2;MAP2;A1;ATP5B;ATP5J;ATP5J2;ATP8B1;ATXN1L;AVPR2;AXIN1;B3GALT4;BACH2;BAHD1;BATF;BATF3;BAZ1B;BCL10;BCL11B;BCL2;BCL9L;BDH1;BEX1;BLM;BMP2;BPTF;BRD2;BRD7;BRPF1;BTRC;C14orf169;C1D;C1GALT1C1;CAD;CALR;CAMTA2;CAND2;CAPN3;CARD11;CARNS1;CBFA2T2;CBX2;CBX5;CBX7;CCAR1;C

I21;ANKZF1;ANXA2;ANXA6;APBA1;APOBEC3F;ARG1;ARHGAP29;ARHGAP35;ARHGGEF5;ARIH2;ARL10;ARL13A;ARL3;ASXL1;ATAD3C;ATM;ATOX1;ATP10A;ATP13A1;ATP1A1;ATP1A3;ATP2A2;ATP2A3;ATP5A1;ATP5B;ATP8B1;ATP8B2;ATP9B;BAZ1B;BCL11B;BLM;BMS1;BPTF;BRD1;BRPF1;BRSK2;BSN;C11orf95;

VP1;RANBP10;RCC2;RP1L1;SARM1;STIM1;TBCC;TCP1;TCP11L1;TPPP;TLL3;TUBA3D;TUBB;TUBGCP4;TUBGCP5;TUBGCP6;ZW1

C;KDM5C;L3MBTL1;L3MBTL2;LDB1;LEF1;LEO1;LPIN1;MAP3K12;MCM2;MECP2;MLL;MLL4;MTA2;MYC;NASP;PAXIP1;PCGF1;PHF13;PHF15;PIM3;POLE3;PRKCA;PRMT2;PYGO2;RBBP4;RBBP7;RBL2;RBM14;RNF20;RNF8;RUVBL1;SATB1;SCMH1;SETD1A;SMARCA4;SMARCAL1;SMARCC1;SMARCC2;SMARCCD1;SRPEL1;HADH;HADHA;HADHB;HERC2;HSPA1L;HSPA9;HSPD1;HTRA2;IARS2;IDH3A;IMMT;JVD;KARS;LARS2;LETM1;LOC494141;MAVS;MCCC1;MCCC2;MGST1;MIPEP;MLXIP;MRPL49;MRPS24;MRPS36;MRPS9;MTCH2;MTOR;MUL1;MYO19;NAT8L;NDUFA10;NDUFA2;NDUFA9;NDUFB4;NDUFB6;NDUFS1;NDUF1D;C2CD3;CALM3;CALR;CAMTA2;CAND2;CAPN3;CARD11;CARD14;CBFA2T2;CBLB;CBX2;CBX5;CBX7;CCAR1;CCDC23;CCDC88C;CCND1;CCND2;CCNT1;CCR7;CD3E;CD4;CD74;CDAN1;CDC16;CDC25B;CDH13;CDK5RAP2;CDKN2A;CDKN2B;CDON;CELF1;CELSR2;CHCHD3;CHD2;CHD3;CHD4;CHD6;CHEK2;CHMP5;D18;RAD51D;RBM14;RFC1;RFWD3;RNF8;RPA1;RPA2;RUVBL1;SFPO;SLX4;SMC1A;SSRP1;SUPT16H;TDP1;TERF2IP;TP53;TP53BP1;UBE2B;UHRF1;UNG;USP7;VCP;WDR33;WRNIP1;XPC;XRCC3;XRCC5;XRCC6;ZYVE

LDH3A2;ALDH5A1;ALDH7A1;ALG8;ALG9;AMACR;AMFR;AMZ1;ANAPCS;APOBEC3F;ARG1;ARIH2;ARL3;ASMT;ASPDH;ATAD3C;ATAT1;ATG10;ATG3;ATIC;ATM;ATP10A;ATP13A1;ATP1A1;ATP1A3;ATP1B3;ATP2A2;ATP2A3;ATP5A1;ATP5B;ATP5J;ATP5J2;ATP6V0E1;ATP6V1D;ATP6V1F;ATP6V1H;ATP8

ATG3;ATG9B;ATM;ATP10A;ATP6V0E1;ATP6V1D;ATP6V1F;ATP6V1H;ATP8B1;ATP9B;ATXN2L;AXIN1;AXIN2;BAD;BAHD1;BAIAP2L1;BAZ1B;BBS1;BBS2;BCL10;BCL11B;BCL2;BCL9L;BICD1;BID;BIK;BIRC6;BLM;BLOC1S1;BMP2;BMS1;BPTF;BRD1;BRD2;BRD7;BRK1;BRPF1;BRSK2;C14orf169;C1D;C22orf28;C2CD3;C

VT3A;EIF4G1;EIF4G2;ELP3;EME2;EP400;ERCC3;ERCC5;ETS1;FAN1;FANCI;FBXL19;FBXO18;FBXO21;FEN1;FLYWCH1;FOSB;FOXC1;FOXJ1;FOXJ3;FOXK1;FOXK2;FOXN1;FOXP1;FOXP4;FUBP1;G3BP1;GABPB2;GATA3;GMEB2;GON4L;GTF3C1;GTF3C2;GTF3C4;H3F3C;HDAC1;HEMK1;HHEX;HIC2;HIST1H2AC;

0;RASA3;RASA4;RASAL3;RASGRF2;SBF1;SGSM2;SRGAP1;SYDE1;SYNGAP1;TBC1D16;TBC1D22B;TBC1D24;TBC1D7;TBC1D9B;TGFBRAP1;TIAM1;TNIK;TRIO;VAV2;VPS39;WDR6

;C14orf169;C1D;CAD;CALR;CAMTA2;CAND2;CAPN3;CARD11;CBFA2T2;CBX2;CBX5;CBX7;CCAR1;CCNT1;CD3EAP;CDH13;CDK5RAP2;CDKN2A;CDKN2B;CDON;CECR1;CELSR2;CHCHD3;CHD2;CHD3;CHD4;CHD6;CHEK2;CIAO1;CIC;CIITA;CIRH1A;CMKLR1;COX10;COX15;CPSF3;CREB3L2;CREG1;CREM;CRTC1;CRT

L1;ILF3;INCENP;ING2;INGS;INO80;JTB;KHDRB51;KIF3B;KLF11;KNTC1;KRT7;L3MBTL1;LIG1;LIG3;LMLN;LRP5;LSM10;LZTS2;MAD2L1BP;MAD2L2;MAP4;MAPRE2;MCM2;MCM3;MCM4;MCM6;MLH1;MND1;MNS1;MSH6;MTA3;MYC;NCAPD2;NCAPD3;NCAPG;NCAPG2;NDC80;NEK9;NINL;NME6;NOLC1;NSUN2;

CBFA2T2;CBX2;CBX5;CBX7;CCAR1;CCNT1;CCR7;CDAN1;CDH13;CDK5RAP2;CDKN2A;CDKN2B;CDON;CELF1;CELSR2;CHCHD3;CHD2;CHD3;CHD4;CHD6;CHEK2;CIAO1;CIC;CIITA;CIRH1A;CIZ1;CLK2;CMKLR1;CREB3L2;CREG1;CREM;CRTC1;CRTC3;CRY2;CSNK2A2;CSRNP2;CTC1;CTCF;CTRN9;CUL7;CYTL1;DCTN1;DDF

1;POLA2;POLE;PPP2R5C;PRMT2;PSMC4;PSMD1;PSMD11;PSMD2;PSMD6;PSMD7;PSME4;RBL2;RFC1;RFWD3;RPA1;RPA2;SFI1;SMARCA4;TAF1;TCF3;TFDP2;TIMELESS;TOP2B;TP53;TUBB;TUBGCP4;TUBGCP5;TUBGCP6;UBE2L3;YWHAE;ZC3H1;

ALRN;LAMTOR1;MADD;MCF2L;MINK1;MYO9B;NCKAP1L;NET1;OBSCN;OCL;PLEKHG2;PSD4;RAB3GAP1;RABGAP1;RABIF;RACGAP1;RALGDS;RALGPS1;RANBP10;RAP1GDS1;RAPGEF1;RASA3;RASA4;RASAL3;RASGRF2;RASGRP2;RGS13;RGS17;SBF1;SGSM2;SIPA1L3;SRGAP1;SYDE1;SYNGAP1;TBC1D16;TBC1D

2;BRD7;BRPF1;BTRC;C14orf169;C1D;CAD;CALR;CAMTA2;CAND2;CAPN3;CARD11;CARNS1;CBLB;CCNF;CCR7;CDC16;CDKN2A;CECR1;CES2;CHD1L;CHEK2;CLN8;CNOT10;CSNK1E;CUL1;CUL4A;CUL7;CUL9;CYP2D6;DAGLA;DBH;DCN;DCP1B;ddb1;DDHD2;DDIT3;DDIT4;DDX6;DERA;DERL2;DFFA;DFFB;DIS3L;DLD;DLST;DNAJC1;DNASE

1L;BEX1;BLM;BMP2;BPTF;BRD2;BRD7;BRPF1;BTRC;C14orf169;C1D;C2CD3;CALM3;CALR;CAMTA2;CAND2;CAPN3;CARD11;CARD14;CBFA2T2;CBLB;CBX2;CBX5;CBX7;CCAR1;CCDC23;CCDC88C;CCND1;CCND2;CCNT1;CCR7;CD3E;CD4;CD74;CDAN1;CDC16;CDC25B;CDH13;CDK5RAP2;CDKN2A;CDKN2B;CDON;C

2;LSM10;MAGOH;MLH1;MTPAP;NONO;NUP214;PABPC1;PAN2;PARN;PDCD11;PHRF1;PNN;POLR2B;POLR2C;POLR2J;PRKCA;PRPF19;PRPF3;PRPF4;PRPF40B;PRPF8;PSMC4;PSMD1;PSMD11;PSMD2;PSMD6;PSMD7;PSME4;PTBP1;RFXO2;RBM15B;RBM17;RBM26;RBM28;RBM4B;RNASE4;RNMT;RNPS1;RPL2

3RD2;BRD7;BRPF1;BTRC;C14orf169;C1D;CAD;CALR;CAMTA2;CAND2;CAPN3;CARD11;CBFA2T2;CBX2;CBX5;CBX7;CCAR1;CCNT1;CD3EAP;CDH13;CDK5RAP2;CDKN2A;CDKN2B;CDON;CECR1;CELSR2;CHCHD3;CHD2;CHD3;CHD4;CHD6;CHEK2;CIAO1;CIC;CIITA;CIRH1A;CMKLR1;COX10;COX15;CPSF3;CREB3L2;CF

3B;NCKAP1L;NET1;NLRP1;NOD1;NODAL;OCL;PDIA5;PDIA6;PLCG1;PPARGC1B;PRKCA;RAB3GAP1;RABGAP1;RACGAP1;RAP1GDS1;RASA3;RASA4;RASAL3;RGS13;RGS17;RYR2;S100A8;S100A9;SCRIB;SHC1;SMAD3;SNX9;SYDE1;SYNGAP1;SYVN1;TATDN2;TAX1BP3;TBC1D7;TNF;TNFRSF10A;TSC1;TSPYL2;TXK;U

VCF2L;MINK1;MYO9B;NCKAP1L;NET1;OBSCN;OCRL;PLEKHG2;PSD4;RAB3GAP1;RABGAP1;RABIF;RACGAP1;RALGDS;RALGPS1;RANBP10;RAP1GDS1;RAPGEF1;RASA3;RASA4;RASAL3;RASGRF2;RASGRP2;RGS13;RGS17;SBF1;SGSM2;SIPA1L3;SRGAP1;SYDE1;SYNGAP1;TBC1D16;TBC1D22B;TBC1D24;TBC1D7;TE  
DH13;CDK5RAP2;CDKN2A;CDKN2B;CDON;CELF1;CELSR2;CHCHD3;CHD2;CHD3;CHD4;CHD6;CHEK2;CIAO1;CIC;CIITA;CIRBP;CIRH1A;CLEC3B;CLK2;CMKLR1;COG7;CREB3L2;CREG1;CREM;CRTC1;CRTC3;CRY2;CSNK2A2;CSRNP2;CTCF;CTR9;CYTL1;DDIT3;DDX17;DDX20;DHX33;DHX9;DNAJA3;DNAJC1;DNMT1;DN

TP8B1;ATXN1L;AVPR2;AXIN1;AXIN2;BAD;BAHD1;BAZ1B;BBS2;BCL10;BCL11B;BCL2;BCL9L;BEX1;BICD1;BLM;BMP2;BPTF;BRD2;BRD7;BRPF1;BTRC;C14orf169;C1D;C2CD3;CALM3;CALR;CAMTA2;CAND2;CAPN3;CARD11;CARD14;CASP1;CBFA2T2;CBLB;CBX2;CBX5;CBX7;CCAR1;CCDC23;CCDC88C;CCND1;CCNI  
CBFA2T2;CBX2;CBX5;CBX7;CCAR1;CCNT1;CCR7;CDAN1;CDH13;CDK5RAP2;CDKN2A;CDKN2B;CDON;CELF1;CELSR2;CHCHD3;CHD2;CHD3;CHD4;CHD6;CHEK2;CIAO1;CIC;CIITA;CIRH1A;CIZ1;CLK2;CMKLR1;CREB3L2;CREG1;CREM;CRTC1;CRTC3;CRY2;CSNK2A2;CSRNP2;CTC1;CTCF;CTR9;CUL7;CYTL1;DCTN1;DDI  
5;UBE2B;UBE2D2;UBE2F;UBE2G2;UBE2I1;UBE2L3;UBE2Q1;UBE2Z;UBE3C;UBR4;UBR7;UHRF1;V  
CL2;BDH1;BLM;BTRC;CAD;CARNS1;CCNF;CCR7;CDC16;CDKN2A;CECR1;CHD1L;CHEK2;CLN8;CNOT10;CSNK1E;CUL1;CUL4A;CUL7;CUL9;CYP2D6;DBH;DCN;DCP1B;DDB1;DDIT3;DDIT4;DDX6;DERA;DERL2;DFFA;DFFB;DIS3L;DLD;DLST;DNAJC1;DNASE1;DNM1;DOCK7;DPYSL2;DRAM1;DROSHA;DTL;DUOX1;DYX1

1D1;NRG1;PCBD1;PPARGC1B;PRMT2;RAD54L2;RBFOX2;RBM14;RNF20;RNF4;SAP30;SF1;SIK1;SIN3B;SMARCA4;SMARCC1;SMARCC2;SMARCCD1;SMARCCD3;SMARCE1;SND1;SNW1;SOX10;SRCAP;SUFU;TADA2A;TAF1;TAF10;TCF3;TFCP2L1;TFDP2;TLE1;TP53BP1;TRIP4;TRRAP;UBE2L3;ZHX2;ZHX3;ZMIZ2;ZMYN

SYNE1;SYNE2;TEX10;TMEM109;TMEM57;TNPO2;TUBB;TXLNG;WDR3;WHSC1;XPC  
ALR;CAMTA2;CAND2;CAPN3;CARD11;CBFA2T2;CBX2;CBX5;CBX7;CCAR1;CCNT1;CD3EAP;CDH13;CDK5RAP2;CDKN2A;CDKN2B;CDON;CECR1;CELSR2;CHCHD3;CHD2;CHD3;CHD4;CHD6;CHEK2;CIAO1;CIC;CIITA;CIRH1A;CMKLR1;CPSF3;CREB3L2;CREG1;CREM;CRTC1;CRTC3;CRY2;CSNK2A2;CSRNP2;CSTF1;CSTF

PRKAG1;PTK2;RACGAP1;RAD54L2;RELA;RYR2;SIK1;SKAP1;SMAD3;STK38;STK39;STXBP1;SUFU;TAOK2;TCF3;TCF7L2;TOP2B;TP53;TRAF3;UTR  
A8;ID1;IL4;ILF3;INPPL1;IRF8;JAZF1;KAT6B;KCTD1;KDM1A;KDM2B;KDM4A;KHDRBS1;KLF11;L3MBTL1;LANCL2;LDB1;LEF1;LIG3;LPIN1;LRP8;MAD2L2;MAGED1;MBD1;MBD2;MDM4;MECP2;MEIS2;MLH1;MPHOSPH8;MSH6;MTA2;MXD3;MYBBP1A;MYC;NAB2;NACC1;NCOR2;NF2;NFX1;NKAP;NODAL;NR1D1;P  
AP;UBE2B;UHRF1;YEAT  
164;CHEK2;CIAO1;CIRBP;CLDN15;CLDN20;CNTNAP1;COL17A1;COX10;COX15;CRTC1;CRTC3;CTCF;DDX20;DDX23;DDX47;DDX51;DDX56;DDX6;DGKD;DGKH;DIAPH1;DKC1;DROSHA;DST;DYNC1H1;EFTUD1;EHD4;EIF2AK3;EIF3A;EIF4A3;EPAH1;EPAH2;EPRS;EP58;EVL;EXOSC10;EZR;FAF1;FAM103A1;FBF1;FGD1  
IM16;TRRAP;UBE2B;UHRF1;YEAT  
TRA2;HYAL1;INCA1;ING5;INO80;INTS7;KHDRBS1;KNTC1;L3MBTL1;LEF1;LRP5;MACF1;MAD2L1BP;MAD2L2;MADD;MAP2K6;MCM2;MCM3;MCM4;MCM6;MDC1;MDM4;MNT;MTA3;MYBBP1A;MYC;NME6;NUP214;PA2G4;PDCD4;PHACTR4;PIM3;PKD1;PPP1R13B;PPP1R9B;PPP2R5C;PRDM4;PRKAG1;PRKCA;  
.10;BCL11B;BCL2;BCL9L;BEX1;BLM;BMP2;BPTF;BRD2;BRD7;BRPF1;BTRC;C14orf169;C1D;CALM3;CALR;CAMTA2;CAND2;CAPN3;CARD11;CARD14;CBFA2T2;CBX2;CBX5;CBX7;CCAR1;CCDC23;CCDC88C;CCND1;CCND2;CCNT1;CCR7;CD3E;CD4;CD74;CDAN1;CDC16;CDC25B;CDH13;CDK5RAP2;CDKN2A;CDKN2B

TTF1;WRNIP  
R2;CHCHD3;CHD2;CHD3;CHD4;CHD6;CHEK2;CIAO1;CIC;CIITA;CIRBP;CIRH1A;CIZ1;CMKLR1;CREB3L2;CREG1;CREM;CRTC1;CRTC3;CRY2;CSNK2A2;CSRNP2;CTC1;CTCF;CTR9;CYTL1;DDIT3;DDX17;DDX20;DHX33;DNAJA3;DNAJC1;DNMT1;DNMT3A;DVL2;ECD;EHMT1;EIF2AK3;EIF2AK4;EIF2B1;EIF3B;EIF4A3;EIF4

PALB2;PAPD7;PARP1;PAXIP1;PMS2;PMS2CL;PMS2P5;POLA1;POLB;POLE;POLG;POLH;POLR2B;POLR2C;POLR2J;PPP2R5C;PRPF19;PSMC4;PSMD1;PSMD11;PSMD2;PSMD6;PSMD7;PSME4;RAD18;RAD51D;RBM14;RFC1;RFWD3;RNF8;RPA1;RPA2;RUVBL1;SFPQ;SGK1;SLX4;SMC1A;SNW1;SSRP1;SUPT16H;TAF1  
CBLB;CCNF;CCR7;CDC16;CDKN2A;CECR1;CHD1L;CHEK2;CLN8;CNOT10;CSNK1E;CUL1;CUL4A;CUL7;CUL9;CYP2D6;DAGLA;DBH;DCN;DCP1B;DDB1;DDHD2;DDIT3;DDIT4;DDX6;DERA;DERL2;DFFA;DFFB;DIS3L;DLD;DLST;DNAJC1;DNASE1;DNM1;DOCK7;DPYSL2;DROSHA;DTL;DYX1C1;ECD;ECI2;EDC3;EDC4;EDEN  
N2B;CDON;CELSR2;CHCHD3;CHD2;CHD3;CHD4;CHD6;CHEK2;CIAO1;CIC;CIITA;CIRBP;CIRH1A;CIZ1;CMKLR1;CREB3L2;CREG1;CREM;CRTC1;CRTC3;CRY2;CSNK2A2;CSRNP2;CTC1;CTCF;CTR9;CYTL1;DDIT3;DDX17;DDX20;DHX33;DNAJA3;DNAJC1;DNMT1;DNMT3A;DVL2;ECD;EHMT1;EIF2AK3;EIF2AK4;EIF2B1;EI

A8;ID1;IL10;IL4;ILF3;INPPL1;IRF8;JAZF1;KAT6B;KCTD1;KDM1A;KDM2B;KDM4A;KHDRBS1;KLF11;L3MBTL1;LANCL2;LDB1;LEF1;LIG3;LPIN1;LRP8;MAD2L2;MAGED1;MBD1;MBD2;MDM4;MECP2;MEIS2;MLH1;MPHOSPH8;MSH6;MTA2;MXD3;MYBBP1A;MYC;NAB2;NACC1;NCOR2;NF2;NFX1;NKAP;NODAL;NR1  
R2;NFE2L1;NMI;NR1D1;NRG1;PCBD1;PER1;PPARGC1B;PRMT2;RAD54L2;RBFOX2;RBM14;RNF20;RNF4;SAP30;SF1;SIK1;SIN3B;SMAD3;SMARCA4;SMARCC1;SMARCC2;SMARCCD1;SMARCCD3;SMARCE1;SND1;SNW1;SOX10;SRCAP;SUFU;TADA2A;TAF1;TAF10;TCF3;TFCP2L1;TFDP2;TLE1;TP53BP1;TRIP4;TRRAP;  
N8;CRADD;CSNK2A2;CSRNP2;CSTB;CTNBL1;CUL1;CUL4A;CXCR3;CYFIP2;DAD1;DBH;DDIT3;DDIT4;DDX19A;DDX20;DDX47;DFFA;DFFB;DHCR24;DHODH;DIDO1;DNAJA3;DNAJB13;DNASE1;DRAM1;EDAR;EIF2AK3;EIF5A;EPAH2;ERBB3;ERCC3;ERCC5;ETS1;FAF1;FAIM3;FCER1G;FGD1;FGF2;FGFR1;FLT4;FOXC1;  
E2L1;NMI;NR1D1;NRG1;PCBD1;PPARGC1B;PRMT2;RAD54L2;RBFOX2;RBM14;RNF20;RNF4;SAP30;SF1;SIK1;SIN3B;SMARCA4;SMARCC1;SMARCC2;SMARCCD1;SMARCCD3;SMARCE1;SND1;SNW1;SOX10;SRCAP;SUFU;TADA2A;TAF1;TAF10;TCF3;TFCP2L1;TFDP2;TLE1;TP53BP1;TRIP4;TRRAP;UBE2L3;ZHX2;ZHX3;  
ATG3;ATG9B;ATM;ATP10A;ATP6V0E1;ATP6V1D;ATP6V1F;ATP6V1H;ATP8B1;ATP9B;ATXN2L;AXIN1;AXIN2;BAD;BAHD1;BAIAP2L1;BAZ1B;BBS1;BBS2;BCL10;BCL11B;BCL2;BCL9L;BICD1;BID;BIK;BIRC6;BLM;BLOC1S1;BMP2;BMS1;BPTF;BRD1;BRD2;BRD7;BRK1;BRPF1;BRSK2;C14orf169;C22orf28;C2CD3;CABP4

HFD1L;MTHFR;MTHFS;MTR;NARS;NFS1;OGDH;PCBD1;PCYOX1;PCYOX1L;PDP;PET112;PFAS;PPCS;PSAT1;PSMC4;PSMD1;PSMD11;PSMD2;PSMD6;PSMD7;PSME4;PTDSS1;SARS;SEPHS2;SERINC5;SHMT1;SLC25A15;SLC46A1;SLC7A6;SMS;TARS;VNN3;YA  
N8;CRADD;CSNK2A2;CSRNP2;CSTB;CTNBL1;CUL1;CUL4A;CXCR3;CYFIP2;DAD1;DBH;DDIT3;DDIT4;DDX19A;DDX20;DDX47;DFFA;DFFB;DHCR24;DHODH;DIDO1;DNAJA3;DNAJB13;DNASE1;DRAM1;EDAR;EIF2AK3;EIF5A;EPAH2;ERBB3;ERCC3;ERCC5;ETS1;FAF1;FAIM3;FCER1G;FGD1;FGF2;FGFR1;FLT4;FOXC1;

ID1;SNW1;SRCAP;SUPT6H;TAF1;TBP;TCEB1;THOC1;THOC2;TNFRSF14;TP53;UBE2I;UBR4;UNG;USP7;VDAC1;VPRBP;YWHAE;ZC3H7  
ISBP1;HSPA8;ID1;IL4;ILF3;INPPL1;IRF8;JAZF1;KAT6B;KCTD1;KDM1A;KDM2B;KDM4A;KHDRBS1;KLF11;L3MBTL1;LANCL2;LDB1;LEF1;LPIN1;LRP8;MAD2L2;MAGED1;MBD1;MBD2;MDM4;MECP2;MEIS2;MPHOSPH8;MTA2;MXD3;MYBBP1A;MYC;NAB2;NACC1;NCOR2;NF2;NFX1;NKAP;NODAL;NR1D1;NRG1;NR  
CRIB;SYDE1;SYNGAP1;TAX1BP3;TBC1D7;TIAM1;TNFAIP1;TRIO;TSC1;VAV

AF1;PARD6A;PCSK5;PLCG1;POLA1;POLR2B;POLR2C;POLR2J;POM121;PSMC4;PSMD1;PSMD2;PSMD6;PSMD7;PSME4;RBM15B;RELA;RNF216;RNMT;RPL21;RRAGA;SATB1;SCRIB;SEH1L;SEPT6;SF3B2;SLAMF1;SLC20A2;SLPI;SMAD3;SMARCA4;SNAPIN;SND1;SNW1;SRCAP;SSRP1;SUPT16H;SUPT4H1;S

1;PCNT;PDE4DIP;PLEKHA7;RAB11FIP3;RAB3GAP1;RABGAP1;SERPINB6;SF11;STARD9;TBCCD1;TCHP;TCP1;TSPYL2;TTLL5;TUBGCP4;TUBGCP5;TUBGCP6;WDR67;ZFYVE2  
RL;PIK3R2;PLEKHG2;PSD4;PTK2;RAB3GAP1;RACGAP1;RALGDS;RAPGEF1;RASA3;RASA4;RASAL3;RASGRF2;RASGRP2;RHOBTB2;RHOF;SCRIB;SIPA1L3;SRGAP1;SYDE1;SYNGAP1;TAX1BP3;TBC1D7;TIAM1;TNFAIP1;TRIO;TSC1;VAV

AF1;PARD6A;PCSK5;PLCG1;POLA1;POLR2B;POLR2C;POLR2J;POM121;PSMC4;PSMD1;PSMD2;PSMD6;PSMD7;PSME4;RBM15B;RELA;RNF216;RNMT;RPL21;RRAGA;SATB1;SCRIB;SEH1L;SEPT6;SF3B2;SLAMF1;SLC20A2;SLPI;SMAD3;SMARCA4;SNAPIN;SND1;SNW1;SRCAP;SSRP1;SUPT16H;SUPT4H1;S  
74;CDKN2A;CHEK2;CLN8;CRADD;CSNK2A2;CSRNP2;CSTB;CTNBNB1;CUL1;CUL4A;CXCR3;CYFIP2;DAD1;DAGLA;DBH;DCTN1;DDIT3;DDIT4;DDX19A;DDX20;DDX47;DFFA;DFFB;DHCR24;DHODH;DIDO1;DNAJA3;DNAJB13;DNAJEA1;DRAM1;DYNC1H1;EDAR;EIF2AK3;EIF4G1;EIF4G2;EIF5A;EPHA2;ERBB3;ERCC3;ER  
1;PPP2R5C;PSMC4;PSMD1;PSMD2;PSMD6;PSMD7;PSME4;PTK2;RELA;RHBDD1;RNF216;RNF4;RNF43;RNF8;SEC61B;SERPINE2;SMAD3;SPG7;SYVN1;TAF1;TCEB1;TNF;TNFAIP1;TTC3;UBE2B;UBE2D2;UBE2G2;UBE2I1;UBE2L3;UBE3C;UBQLN4;UFD1L;UHRF1;USP11;USP13;USP20;USP24;USP27X  
;DHDS;DKC1;DLG3;DLST;DNMT1;DNMT3A;DSTYK;EEF2K;EFNA4;EHMT1;EIF2AK3;EIF2AK4;ELP3;EPAH1;EPAH2;ERBB3;ERCC3;EXT2;EZH1;FAM20B;FASN;FASTKD5;FGFR1;FGFR1L;FGFY;FKRP;FLT4;FN3KBP;FTSJ2;FTSJ3;FUT11;FUT2;FYN;GAL3S1;GALK2;GALNT10;GALNT6;GALNT9;GALT;GART;GGT7;GGT411

74;CDKN2A;CHEK2;CLN8;CRADD;CSNK2A2;CSRNP2;CSTB;CTNBNB1;CUL1;CUL4A;CXCR3;CYFIP2;DAD1;DAGLA;DBH;DCTN1;DDIT3;DDIT4;DDX19A;DDX20;DDX47;DFFA;DFFB;DHCR24;DHODH;DIDO1;DNAJA3;DNAJB13;DNAJEA1;DRAM1;DYNC1H1;EDAR;EIF2AK3;EIF4G1;EIF4G2;EIF5A;EPHA2;ERBB3;ERCC3;ER

;HMG20A;HMG1A;HSBP1;HSPA8;ID1;IL10;IL4;ILF3;INPPL1;IRF8;JAZF1;KAT6B;KCTD1;KDM1A;KDM2B;KDM4A;KHDRBS1;KLF11;L3MBTL1;LANCL2;LDB1;LEF1;LPIN1;LRP8;MAD2L2;MAGED1;MBD1;MBD2;MDM4;MECP2;MEIS2;MPHOSPH8;MTA2;MXD3;MYBBP1A;MYC;NAB2;NACC1;NCOR2;NF2;NFX1;NKAP;

LSR2;CHCHD3;CHD2;CHD3;CHD4;CHD6;CHEK2;CIAO1;CIC;CIITA;CIRH1A;CMKLR1;CPSF3;CREB3L2;CREG1;CREM;CRTC1;CRTC3;CRY2;CSNK2A2;CSRNP2;CSTF1;CSTF2;CSTF3;CTCF;CTR9;CYTL1;DDIT3;DDX17;DDX20;DHX33;DHX38;DIDO1;DNAJA3;DNMT1;DNMT3A;DRG1;DVL2;ECD;EHMT1;EIF2AK3;EIF4A3;EIF

YVN1;TAF1;TCEB1;TNFAIP1;TTC3;UBE2B;UBE2D2;UBE2G2;UBE2I1;UBE2L3;UBE3C;UBQLN4;UFD1L;UHRF1;USP11;USP13;USP20;USP24;USP27X;USP35;USP36;USP39;USP40;USP48;USP54;USP7;V

GNE;GUCY2D;HKDC1;HMGXB3;IKBK;IKBK;IP6K2;IRAK1;ITPKB;KALRN;LCK;LMTK3;MAP2K6;MAP2K7;MAP3K12;MAP3K4;MAP3K9;MAPK7;MAPK9;MINK1;MPP2;MTOR;MTPAP;MYBBP1A;NDUFA10;NEK9;NME6;NOL9;OBSCN;PACIN1;PAPD7;PASK;PDPK1;PEAK1;PFKP;PI4K2A;PI4KA;PI4KAP2;PI4KB;PIK3R2  
UA3;DNAJC1;DOCK7;DRD4;DVL2;EDEM1;EFCAB4B;EIF2AK3;EPAH1;EPAH2;ERBB3;FGF2;FGFR1;FOXJ1;FXN;FZR1;GABARAPL2;GATA3;GIPR;GMFG;GOSR2;GPR55;GSTO1;GTF2A2;GTF3C4;HGF;HSP90AB1;HSP90B1;HSPD1;HTRA2;HYOU1;IKBK;IL10;IL4;IRAK1;IRS1;ITPR3;JTB;KDELRS1;KDM1A;KITLG;LCK;LRP8;P

UFA9;NDUFB4;NDUFB6;NDUFS1;NDUFV3;NNT;OGDH;PAM16;PI4KB;PLD6;POLG;PRKCA;SAMM50;SCO1;SCO2;SDHA;SDHB;SFKN1;SFKN2;SFKN3;SLC25A12;SLC25A15;SLC25A23;SLC25A27;SLC25A42;SLC25A45;SMCR7L;SNPH;SOX10;SPG7;STAR;TAMM41;THEM4;TIMM17B;TOMM34;VAMP1;VAT1;VDAC1;V

TNFAIP1;TTC3;UBE2B;UBE2D2;UBE2G2;UBE2I1;UBE2L3;UBE3C;UBQLN4;UFD1L;UHRF1;USP11;USP13;USP20;USP24;USP27X;USP35;USP36;USP39;USP40;USP48;USP54;USP7;V  
4D6;CHEK2;CIAO1;CIC;CIITA;CIRH1A;CLK2;CMKLR1;CREB3L2;CREG1;CREM;CRTC1;CRTC3;CRY2;CSNK2A2;CSRNP2;CTCF;CTR9;CYTL1;DDIT3;DDX17;DDX20;DHX33;DNAJA3;DNMT1;DNMT3A;DVL2;ECD;EHMT1;EIF2AK3;EIF4A3;ELP3;ERCC3;ETS1;EZH1;FADS1;FGF2;FGFR1;FLNA;FOSB;FOXC1;FOXJ1;FOXJ3;FOX

;C3;ERCC5;ETS1;FADS1;FAN1;FANCI;FEN1;FLT4;FOXM1;FXN;FZR1;GADD45A;GOSR2;HERC2;HGF;HIF1AN;HMG1A;HSP90B1;HUWE1;HYOU1;IKBK;IL18;IL18BP;IL26;ING2;INO80;INTS7;IRAK1;KDELRS1;KDM1A;LARP1;LIG1;LIG3;LOC100133315;MAD2L2;MAP2K6;MAP2K7;MAP3K12;MAP3K4;MAP3K9;MAPK7;  
(SRAP2;CDKN2A;CDKN2B;CDON;CELSR2;CHCHD3;CHD2;CHD3;CHD4;CHD6;CHEK2;CIAO1;CIC;CIITA;CIRBP;CIRH1A;CIZ1;CLK2;CMKLR1;CREB3L2;CREG1;CREM;CRTC1;CRTC3;CRY2;CSNK2A2;CSRNP2;CTC1;CTCF;CTR9;CYTL1;DDIT3;DDX17;DDX20;DHCR7;DHX33;DL;DNAJA3;DNAJC1;DNMT1;DNMT3A;DRD4;I  
1;TCEB1;TNFAIP1;TTC3;UBE2B;UBE2D2;UBE2G2;UBE2I1;UBE2L3;UBE3C;UBQLN4;UFD1L;UHRF1;USP11;USP13;USP20;USP24;USP27X;USP35;USP36;USP39;USP40;USP48;USP54;USP7;V  
S;EZH1;F2;FGF2;FGFR1;FLNA;FOSB;FOXJ1;FOXX1;FOXM1;FOX P1;FYN;FZR1;GABARAPL2;GADD45A;GATA3;GLG1;GMFG;GRIN2C;GTPBP4;HCFC1;HDAC1;HEXIM1;HHEX;HIC2;HIF1AN;HMG20A;HMG1A;HNRNP2B1;HSBP1;HSP90AB1;HSPA8;HYAL2;ID1;IL10;IL4;ILF3;INCA1;INPPL1;IRF8;JAZF1;KAT6B;KCTD1;K  
DM1A;KDM2B;KDM4A;KHDRBS1;KLF11;L3MBTL1;LANCL2;LDB1;LEF1;LPIN1;LRP8;MAD2L2;MAGED1;MBD1;MBD2;MDM4;MECP2;MEIS2;MPHOSPH8;MTA2;MXD3;MYBBP1A;MYC;NAB2;NACC1;NCOR2;NFX1;NKAP;NODAL;NR1D1;NRG1;NRIP2;PA2G4;PABPC1;PARP1;PATZ1;PDCD4;PER1;PPARA;PPAR;PPA

1;SCRIB;SEPT6;SF3B2;SLAMF1;SLC20A2;SMAD3;SMARCA4;SNAPIN;SND1;SNW1;SRCAP;SUPT6H;TAF1;TARDBP;TBP;TCEB1;THOC1;THOC2;TNF;TNFRSF14;TP53;UBE2I1;UBR4;UNG;USP7;VDAC1;VPRBP;YWHAE;ZC3H  
1;SCRIB;SEPT6;SF3B2;SLAMF1;SLC20A2;SMAD3;SMARCA4;SNAPIN;SND1;SNW1;SRCAP;SUPT6H;TAF1;TARDBP;TBP;TCEB1;THOC1;THOC2;TNF;TNFRSF14;TP53;UBE2I1;UBR4;UNG;USP7;VDAC1;VPRBP;YWHAE;ZC3H

C1;HEXIM1;HHEX;HIC2;HIF1AN;HMG20A;HMG1A;HSBP1;HSPA8;ID1;IL10;IL4;ILF3;INPPL1;IRF8;JAZF1;KAT6B;KCTD1;KDM1A;KDM2B;KDM4A;KHDRBS1;KLF11;L3MBTL1;LANCL2;LDB1;LEF1;LPIN1;LRP8;MAD2L2;MAGED1;MBD1;MBD2;MDM4;MECP2;MEIS2;MPHOSPH8;MTA2;MXD3;MYBBP1A;MYC;NAB2;N

T6B;KCTD1;KDM1A;KDM2B;KDM4A;KHDRBS1;KLF11;L3MBTL1;LANCL2;LDB1;LEF1;LPIN1;LRP8;MAD2L2;MAGED1;MBD1;MBD2;MDM4;MECP2;MEIS2;MLL4;MPHOSPH8;MTA2;MXD3;MYBBP1A;MYC;NAB2;NACC1;NCOR2;NFX1;NKAP;NODAL;NR1D1;NRG1;NRIP2;PA2G4;PARP1;PATZ1;PDCD4;PER1;PPARA;  
(SRAP2;CDKN2A;CDKN2B;CDON;CELSR2;CHCHD3;CHD2;CHD3;CHD4;CHD6;CHEK2;CIAO1;CIC;CIITA;CIRBP;CIRH1A;CIZ1;CLK2;CMKLR1;CREB3L2;CREG1;CREM;CRTC1;CRTC3;CRY2;CSNK2A2;CSRNP2;CTC1;CTCF;CTR9;CYTL1;DDIT3;DDX17;DDX20;DHX33;DL;DNAJA3;DNAJC1;DNMT1;DNMT3A;DRD4;V

NDUFA10;NDUFA2;NDUFA9;NDUFB4;NDUFB6;NDUFS1;NDUFV3;NNT;OGDH;PAM16;PI4KB;PLD6;POLG;PRKCA;SAMM50;SCO1;SCO2;SDHA;SDHB;SFKN1;SFKN2;SFKN3;SLC25A12;SLC25A15;SLC25A23;SLC25A27;SLC25A42;SLC25A45;SMCR7L;SNPH;SOX10;SPG7;STAR;TAMM41;THEM4;TIMM17B;TOMM34;  
5G1;MACF1;MDN1;MLH1;MSH6;MTOR;MYO9B;NCKAP1L;NDUFS1;NET1;NME6;OCRL;PMS2;PMS2P5;PSMC4;PSMD6;PTK2;PTPRN2;RAB3GAP1;RABGAP1;RABL2A;RABL2B;RACGAP1;RAP1GDS1;RASA3;RASA4;RASAL3;RGS13;RGS17;RHOF;SCRIB;SNX9;SYDE1;SYNGAP1;TAX1BP3;TBC1D7;TBCC;TSC1;UCK2;WI  
FPD4;ENTPD5;EPAH1;EPAH2;FGD1;FOXJ1;GABARAPL2;GFM1;GNG10;GNL2;GNL3L;GTPBP4;HSPD1;INO80;LSG1;MACF1;MCCC2;MDN1;MLH1;MSH6;MTOR;MYO9B;NCKAP1L;NDUFS1;NET1;NME6;NTSE;NUTD9;OCRL;PMS2;PMS2P5;PPCS;PRPS1;PSMC4;PSMD6;PTK2;PTPRN2;QTRT1;RAB3GAP1;RABGAP1;  
;PPME1;PRC1;PRKAG1;PTK2;RACGAP1;RAD54L2;RELA;RYR2;SIK1;SKAP1;SLC2A1;SMAD3;STK38;STK39;STXBP1;SUFU;TAOK2;TCF3;TCF7L2;TOP2B;TP53;TRAF3;UTR

2;MKL1;MTOR;MTSS1L;NKD1;NLRP1;NOD1;NUP62;PHRF1;PKD1;PLEKHA2;PLSCR4;POLR2J;PPARA;PPARGC1B;PTK2;PTTG2;RAPGEF1;RELA;REPS1;RUNX2;SCAF1;SFRP5;SH3BP5;SHANK1;SKAP1;SNX6;SOC5;SON;SRMR2;ST13;STX1B;STXBP1;SYNGAP1;TCF7L2;TFDP2;THRA;TNFAIP1;TNK2;TRIM16;U2AF2;UBI  
I;PLEKHG2;PSD4;PTK2;RAB3GAP1;RALGDS;RASA3;RASA4;RASAL3;RASGRF2;RASGRP2;RREB1;SCRIB;SHC1;SRGAP1;SYDE1;SYNGAP1;TAX1BP3;TBC1D7;TIAM1;TNFAIP1;TP53;TRIO;TSC1;VANGL2;VAV  
4F8;SEC61B;SYVN1;TAF1;TCEB1;TNFAIP1;TTC3;UBE2B;UBE2D2;UBE2G2;UBE2I1;UBE2L3;UBE3C;UBQLN4;UFD1L;UHRF1;USP11;USP13;USP20;USP24;USP27X;USP35;USP36;USP39;USP40;USP48;USP54;USP7;V  
YO9B;NCKAP1L;NET1;NTSE;NUTD9;OCRL;PMS2;PMS2P5;PSMC4;PSMD6;PTK2;PTPRN2;RAB3GAP1;RABGAP1;RABL2A;RABL2B;RACGAP1;RAP1GDS1;RASA3;RASA4;RASAL3;RGS13;RGS17;RHOF;SCRIB;SNX9;SYDE1;SYNGAP1;TAX1BP3;TBC1D7;TBCC;TSC1;WRNII

EIF2AK3;EIF2AK4;EIF2B1;EIF4A3;EPA1;EPRS;EZH1;F2;FAM132A;FGF2;FGFR1;FLNA;FOSB;FOXJ1;FOXK1;FOXMI1;FOXP1;FYN;FZR1;GABARAPL2;GABBR1;GADD45A;GATA3;GLG1;GMFG;GRIN2C;GRM2;GTPBP4;HCFC1;HDAC1;HEXIM1;HHEX;HIC2;HIF1AN;HMG20A;HMGA1;HNRNPA2B1;HSBP1;HSP90AB1;HSF1;IEK2;CIAO1;CIC;CIITA;CIRH1A;CMKLR1;CREB3L2;CREG1;CREM;CRTC1;CRTC3;CRY2;CSNK2A2;CSRNP2;CTCF;CTR9;CYTL1;DDIT3;DDX17;DDX20;DHX3;DNAJA3;DNMT1;DNMT3A;DVL2;ECD;EHMT1;EIF2AK3;EIF4A3;ELP3;ERCC3;ETS1;EZH1;FADS1;FGF2;FGFR1;FLNA;FOSB;FOXC1;FOXJ1;FOXJ1;FOXJ3;FOXK1;FCIA;KHDRBS1;KLF11;L3MBTL1;LANCL2;LDB1;LEF1;LPIN1;LRP8;MAD2L2;MAGED1;MBD1;MBD2;MDM4;MECP2;MEIS2;MPHOSPH8;MTA2;MXD3;MYBBP1A;MYC;NAB2;NACC1;NCOR2;NFX1;NKAP;NODAL;NR1D1;NRG1;NRIP2;PA2G4;PARP1;PATZ1;PDCD4;PER1;PPARA;PPARD;PPARGC1B;PRMT2;RAMP3;RBBF1;HDAC1;HEXIM1;HHEX;HIC2;HIF1AN;HMG20A;HMGA1;HSBP1;HSPA8;ID1;IL10;IL4;ILF3;INPPL1;IRF8;JAZF1;KAT6B;KCTD1;KDM1A;KDM2B;KDM4A;KHDRBS1;KLF11;L3MBTL1;LANCL2;LDB1;LEF1;LPIN1;LRP8;MAD2L2;MAGED1;MBD1;MBD2;MDM4;MECP2;MEIS2;MPHOSPH8;MTA2;MXD3;MYBBP1A;MYC;

1;NT5E;NUDT9;OCRL;PMS2;PMS2P5;PSMC4;PSMD6;PTK2;PTPRN2;RAB3GAP1;RABGAP1;RABL2A;RABL2B;RACGAP1;RAP1GDS1;RASA3;RASA4;RASAL3;RGS13;RGS17;RHOF;SCRIB;SNX9;SYDE1;SYNGAP1;TAX1BP3;TBC1D7;TBCC;TSC1;WRNIF1;NT5E;NUDT9;OCRL;PMS2;PMS2P5;PSMC4;PSMD6;PTK2;PTPRN2;RAB3GAP1;RABGAP1;RABL2A;RABL2B;RACGAP1;RAP1GDS1;RASA3;RASA4;RASAL3;RGS13;RGS17;RHOF;SCRIB;SNX9;SYDE1;SYNGAP1;TAX1BP3;TBC1D7;TBCC;TSC1;WRNIF

IF4;RNF43;RNF8;SEC61B;SYVN1;TAF1;TCEB1;TNFAIP1;TTC3;UBE2B;UBE2D2;UBE2G2;UBE2I;UBE2L3;UBE3C;UBQLN4;UFD1L;UHRF1;USP11;USP13;USP20;USP24;USP27X;USP35;USP36;USP39;USP40;USP48;USP54;USP7;V1NTRL;CORO2A;CROCC;DCLK2;DCTN1;DCTN5;DDHD2;DDX20;DFNB31;DGKQ;DHCR24;DHX9;DIAPH1;DIS3L;DNAH1;DNAJA3;DNAJC7;DNHD1;DNM1;DRG1;DST;DSTYK;DTL;DYNC1H1;DYNC1I2;DYNC1L1;DYNLT1;EMD;EML3;EPB41L2;EPPK1;EPS8;EVL;EXOC7;EZR;FAM110B;FBF1;FGD1;FKBP4;FLNA;FLNB;FLNC

DNAA3;DNHD1;DNM1;DST;DTL;DYNC1H1;DYNC1I2;DYNC1L1;DYNLT1;EMD;EML3;EPB41L2;EPS8;EXOC7;EZR;FAM110B;FBF1;FKBP4;FLNB;FYN;GRIN2C;GYS2;HAUS5;HERC2;HSPH1;INCENP;INO80;INPPL1;INVS;JTB;KDM4A;KIAA0368;KIAA0586;KIAA0753;KIF13B;KIF16B;KIF21B;KIF3B;KIF4A;KIF5C;KLC1;KLC2;SLAMF1;SLC20A2;SMAD3;SNAPIN;SND1;SNW1;SRCAP;SUPT6H;TAF1;TBP;TCEB1;THOC1;THOC2;TNFRSF14;TP53;UBE2I;UBR4;UNG;USP7;VDAC1;VPRBP;YWHAE;ZC3H7

D2;MYCBP;NCAPG;NEURL4;NINL;NPHP4;ODF2;PCIF1;PCM1;PCNT;PDE4DIP;PLEKHA7;PTK2;RAB11FIP3;RAB3GAP1;RABGAP1;RTTN;RUVBL1;SERPINB6;SFI1;STARD9;TBCCD1;TCHP;TCP1;TCTN2;TMEM216;TRIP4;TSPYL2;TTL5;TUBGCP4;TUBGCP5;TUBGCP6;WDR67;ZFYVE1;IEK2;CIAO1;CIC;CIITA;CIRH1A;CMKLR1;CREB3L2;CREG1;CREM;CRTC1;CRTC3;CRY2;CSNK2A2;CSRNP2;CTCF;CTR9;CYTL1;DDIT3;DDX17;DDX20;DHX3;DNAJA3;DNMT1;DNMT3A;DVL2;ECD;EHMT1;EIF2AK3;EIF4A3;ELP3;ERCC3;ETS1;EZH1;FADS1;FGF2;FGFR1;FLNA;FOSB;FOXC1;FOXJ1;FOXJ1;FOXJ3;FOXK1;FCU;U;TCF7L2;TGS1;THOC1;THOC2;THRA;TNF;TP53;TSC1;TXN;UZAF2;XPOS;ZFYVE

;EZH1;FGF2;FGFR1;FOSB;FOXC1;FOXJ1;FOXJ1;FOXK2;FOXMI1;FOXP1;FUBP1;GABPB2;GATA3;GMEB2;GTF2A2;HCFC1;HDAC1;HEXIM1;HGF;HHEX;HIF1AN;HMG20A;HSBP1;HTATIP2;HTATSF1;HYAL2;ID1;IKBKAP;IKZF3;IL10;IL26;IL4;INO80;IRAK1;IRF8;ITGA6;JAZF1;KDM1A;KDM2B;KDM4C;KLF11;LDB1;LEF1;LERBB3;FGF2;FGFR1;FOXJ1;FXN;FZR1;GABARAPL2;GIPR;GMFG;GOSR2;GPR55;GTF3C4;HGF;HSP90AB1;HSP90B1;HSPD1;HTRA2;HYOU1;IRAK1;IRS1;ITPR3;JTB;KDELR3;KITLG;LCK;LRP8;MADD;MAGED1;MAP2K6;MAP2K7;MAP3K4;MAP3K9;MAPK8IP3;MBTPS1;MSH6;MUL1;MYC;MYO9B;NCKAP1L;NET1;NLR

1;FOXJ1;GFM1;GNG10;GNL2;GNL3;GTPBP4;HSPD1;INO80;LSG1;MACF1;MCCC2;MDN1;MLH1;MSH6;MTOR;MYO9B;NCKAP1L;NDUFS1;NET1;NME6;NT5E;NUDT9;OCRL;PMS2;PMS2P5;PPCS;PSMC4;PSMD6;PTK2;PTPRN2;QTRTD1;RAB3GAP1;RABGAP1;RABL2A;RABL2B;RACGAP1;RAP1GDS1;RASA3;RASA4;ZMI2

;HMGXB3;IKBKAP;IKBKE;IP6K2;IRAK1;ITPKB;KALRN;LCK;LMTK3;MAP2K6;MAP2K7;MAP3K12;MAP3K4;MAP3K9;MAPK7;MAPK9;MINK1;MPP2;MTOR;NEK9;NME6;NOL9;OBSCN;PACSIN1;PASK;PDPK1;PEAK1;PFKP;PI4K2A;PI4KA;PI4KAP2;PI4KB;PIK3R2;PIK3R4;PIM3;PIP4K2A;PIP4K2B;PIP5K1C;PKN3;POLR2B;F

K3;MAP2K6;MAP2K7;MAP3K12;MAP3K4;MAP3K9;MAPK7;MAPK9;MINK1;MTOR;NDUFA10;NEK9;NOL9;OBSCN;PACSIN1;PASK;PDPK1;PEAK1;PFKP;PI4K2A;PI4KA;PI4KAP2;PI4KB;PIK3R2;PIK3R4;PIM3;PIP4K2A;PIP4K2B;PIP5K1C;PKN3;POLR2B;POLR2J;PRKAG1;PRKCA;PRKCH;PRKCC;PRKX;PTK2;RIOK1;RPS6I

CN;PAFAH2;PASK;PEBP1;PIGU;PLA2G7;PLCD4;PLCG1;PLCH2;PLEKHA2;PLEKHA7;PLEKHG2;PSD4;RALGPS1;RASA3;RASA4;RASAL3;RASGRF2;SBF1;SEC14L2;SH2B1;SH3PXD2A;SHC1;SKAP1;SNX29;SNX6;SNX9;SPTBN1;SYNGAP1;TECPR1;TEX2;TIAM1;TRIO;TULP3;VAV2;ZCCHC14;ZFYVE26;ZFYVE

SLC25A15;SLC25A23;SLC25A27;SLC25A42;SLC25A45;STAR;TAMM41;THEM4;TIMM17B;VDAC1;VDAC

IAR1;SLC25A12;SLC25A15;SLC25A23;SLC25A27;SLC25A42;SLC25A45;SMAD3;STAR;SUN2;TAMM41;THEM4;TIMM17B;VDAC1;VDAC

VD2;CD1A;CD4;CD74;CDKAL1;CHCHD3;CHMP4C;CHMP5;CHMP7;CHST12;CLCN3;CLCN6;CLIC1;CLN8;CLSTN1;COG1;COG2;COG5;COG7;COPG2;COX10;COX15;COX5B;COX8A;CREB3L2;CUBN;CYB5B;CYP2D6;DAD1;DBH;DDX19A;DDX19B;DERL2;DGKH;DHCR24;DHCR7;DHDDS;DHODH;DNAJC1;DNAJC11;DOPE

IGAT4B;MMP23B;MRPL10;MRPL4;MRPL41;MTIF2;MYPOP;NCK2;NEURL;NPAS1;NPEPL1;NR2F6;OTUD7A;PABPN1;PCSK1N;PDF;PDXP;PGLYRP2;PRDM8;PSMD12;RCE1;REPIN1;RPP25;SKOR1;SNAPC2;SNRPA;SOCS1;STK11;SUV420H2;TAF6L;TBX6;TFR2;TOR2A;TPST2;UCN;UFSP2;UGP2;USF2;USP33;UTF1;VAP

I6;ZFPM1;ZNF219;ZNF35;ZNF358;ZNF414;ZNF444;ZNF564;ZNF575;ZNF579;ZNF628;ZNF638;ZNF668;ZNF747;ZNF764;ZNF771;ZNF784;ZNF787;ZNF837;ZNF865;ZSCAN:

POP;NCK2;NEURL;NPAS1;NR2F6;PABPN1;PDF;PDXP;PRDM8;PSMD12;RCE1;REPIN1;RPP25;SKOR1;SNAPC2;SNRPA;SOCS1;STK11;SUV420H2;TAF6L;TBX6;TOR2A;TPST2;UCN;UGP2;USF2;USP33;UTF1;VAPB;WNT6;YIF1A;ZDHHC1;ZFPM1;ZNF219;ZNF35;ZNF358;ZNF414;ZNF444;ZNF564;ZNF575;ZNF579;ZNF6

NF747;ZNF764;ZNF771;ZNF784;ZNF787;ZNF837;ZNF865;ZSCAN1

NF638;ZNF668;ZNF747;ZNF764;ZNF771;ZNF784;ZNF787;ZNF837;ZNF865;ZSCAN1

ZNF771;ZNF784;ZNF787;ZNF837;ZNF865;ZSCAN1  
71;ZNF784;ZNF787;ZNF837;ZNF865;ZSCAN1

575;ZNF579;ZNF628;ZNF638;ZNF668;ZNF747;ZNF764;ZNF771;ZNF784;ZNF787;ZNF837;ZNF865;ZSCAN1

37;ZNF865;ZSCAN1

33;GLI4;GLTPD2;GMPPB;GPAA1;GPN1;GRIN1;GRIN3B;H1FX;H2AFX;HCN2;HES4;HIC1;HMG20B;HSPB1;IDUA;INO80B;IRF2BP1;JUNB;JUND;KIFC2;KISS1R;KLF2;LOXL1;LRRC26;LTB;LTC4S;MAST1;MAT2B;MBD4;MEX3D;MGAT4B;MIB2;MMP23B;MTIF2;MYPOP;NCK2;NDUFAF3;NEURL;NPAS1;NPB;NPEPL1;NR2

71;ZNF784;ZNF787;ZNF837;ZNF865;ZSCAN1

;ZNF575;ZNF579;ZNF628;ZNF638;ZNF668;ZNF747;ZNF764;ZNF771;ZNF784;ZNF787;ZNF837;ZNF865;ZSCAN1

4;ZNF771;ZNF784;ZNF787;ZNF837;ZNF865;ZSCAN1

4AST1;MAT2B;MBD4;METTL21A;MEX3D;MGAT4B;MMP23B;MRPL10;MRPL4;MRPL41;MTIF2;MYPOP;NCK2;NEURL;NPAS1;NPEPL1;NR2F6;NUDT3;OAT;OTUD7A;PABPN1;PCSK1N;PDF;PDXP;PGLYRP2;PHOSPHO1;PRDM8;PSMD12;RCE1;REPIN1;RPP25;SKOR1;SNAPC2;SNRPA;SOCS1;SQLE;STK11;SUV420H2;T

NF564;ZNF575;ZNF579;ZNF628;ZNF638;ZNF668;ZNF747;ZNF764;ZNF771;ZNF784;ZNF787;ZNF837;ZNF865;ZSCAN1

XL1;LTB;LTB4R2;LTC4S;MAST1;MAT2B;MBD4;METTL21A;MEX3D;MGAT4B;MMP23B;MRPL10;MRPL4;MRPL41;MTIF2;MYPOP;NCK2;NEURL;NPAS1;NPEPL1;NR2F6;NUDT3;OAT;OTUD7A;PABPN1;PCSK1N;PDF;PDXP;PGLYRP2;PHOSPHO1;PRDM8;PSMD12;RCE1;REPIN1;RPP25;SKOR1;SNAPC2;SNRPA;SOCS1;

3;ZNF668;ZNF747;ZNF764;ZNF771;ZNF784;ZNF787;ZNF837;ZNF865;ZSCAN1



F1;VAPB;WNT6;ZDHHC1;ZFPM1;ZNF219;ZNF35;ZNF358;ZNF414;ZNF444;ZNF564;ZNF575;ZNF579;ZNF628;ZNF638;ZNF668;ZNF747;ZNF764;ZNF771;ZNF784;ZNF787;ZNF837;ZNF865;ZSCAN:



PTBN4;SSR1;SURF1;TADA3;TAOK3;TAZ;TLK2;TLR7;TNFAIP3;TNFRSF4;TNFSF15;TNK1;TOP1;TP73;TRAF2;TRAF4;TRAF6;TRIB3;TRIM24;TSSK6;TTN;ULK3;VAV3;WNT7A;ZAP70;ZBTB17;ZEB2;ZFP91;

M;STX1A;SYNGR1;SYTL1;TIMM10;TIMM13;TIMM50;TLR7;TMED1;TMED3;TNFRSF4;TNFSF15;TOMM40L;TPR;TRAF2;TRAF6;TRPS1;UEVLD;USE1;VPS13B;VPS16;VPS41;VTI1A;WDR24;YIPF5;YWHAZ;

1;RPLP2;RPS15;RPS2;RPS28;S100A13;SCARB2;SEC22B;SEC24B;SENP2;SERGEF;SLC25A6;SNF8;SNX20;SPTBN4;SSNA1;SSR1;SSR4;STAM;STX1A;SYNGR1;SYTL1;TIMM10;TIMM13;TIMM50;TLR7;TMED1;TMED3;TMSB4X;TNFRSF4;TNFSF15;TOMM40L;TOR1AIP1;TPR;TRAF2;TRAF6;TRPS1;UBL4A;UEVLD;USE1;VF

A13;TIMM50;TLR7;TMED1;TMED3;TNFRSF4;TNFSF15;TOMM40L;TPR;TRAF2;TRAF6;TRPS1;UEVLD;USE1;VPS13B;VPS16;VPS41;VTI1A;WDR24;YIPF5;YWHAZ;

LK2;TMEM161A;TOP2A;TOPBP1;TP73;TPR;TRAF2;TRAF4;TRAF6;TREX2;TRIB3;TRIP12;TXNRD1;ULK3;VAV3;WNT7A;ZBTB17;Z

4;COQ7;COQ9;CPSF2;CPSF4;CPT1C;CREB3;CREB3L4;CRIP1;CRYL1;CSDE1;CSNK1G1;CTSC;CTSF;CTU2;CYP2E1;DALRD3;DCXR;DDT;DDX39A;DEAF1;DECR2;DERL3;DGUOK;DHDH;DHRS3;DHRS4;DNAJC17;DNAJC30;DNASE1L2;DND1;DOK7;DOLK;DPM3;DPP7;DPP8;DSE;DTD1;DTX3;DTYMK;DUSP10;DUSP2;DUSP

3;GNG8;GNGT2;GRIN3A;GTF2A1;GTF3C5;HAUS8;HDAC10;HDAC11;HES6;HOOK3;IFFO1;IFT27;INO80E;IPO8;IQGAP2;KAT2A;KCNH4;KCNN4;KCNQ4;KDM5A;KDM6A;KIF15;KIF20A;KIF24;KIF7;KLHL12;KRT18;KRTCAP2;LAMB1;LAMTOR2;LAT;LATS1;LATS2;LIME1;MAD1L1;MAPK1;MBD3;MCM7;MCRS1;MED1;MUTYH;NCOA3;NDUFA13;NHP2;NIPBL;NLE1;NMRAL1;NOL12;NR2C2AP;NSRP1;NTHL1;NUP153;NUSAP1;OBFC1;OGG1;P2RX7;PAFAH1B2;PATL1;PHF16;PHF20;PIN1;PIPSK1A;PNKP;POLD1;POLD4;POLR2F;POLR2G;POLR2I;POLR2L;POLR3K;POP7;POU2F1;PPP2R3B;PSMA7;PSMB4;PSMB5;PSMB7;PSMD9;PUS1

NCAPH2;NCOA3;NDUFS7;NDUFS8;NEURL2;NF1;NIPBL;NUP153;NUSAP1;OBFC1;P2RX7;PARK7;PARP10;PEX16;PEX6;PHF1;PHF16;PHF20;PHPT1;PIK3C3;PIN1;PIPSK1A;PLA2G6;PLEKHF1;POLD1;POLD4;POLRMT;PREB;PRMT7;RAC3;RAD21;RANBP9;RBBP5;REC8;ROCK2;RSF1;RTEL1;SAC3D1;SDHAF1;SEC24B;SE

;NDUFB9;NDUFS6;NDUFS7;NDUFS8;NDUFV1;NF1;NME3;NME4;NOG;NPRL2;NRP1;NT5C;NTHL1;NUDT1;NUDT18;OGG1;OXSR1;P2RX7;PANK4;PAPSS1;PCYT2;PDE6G;PDK4;PEMT;PEX6;PFKFB2;PGM2;PHEX;PHPT1;PICK1;PIGQ;PIK3C3;PIK3CB;PIK3CG;PIN1;PIPSK1A;PIPSK1B;PLA2G6;PLCD1;PMM1;PMVK;PNI;CREB3;CREB3L4;CRYL1;CSDE1;CSNK1G1;CTSC;CTSF;CTU2;CYP2E1;DALRD3;DCXR;DDX39A;DEAF1;DECR2;DERL3;DGUOK;DHDH;DHRS3;DHRS4;DNAJC17;DNAJC30;DNASE1L2;DOK7;DOLK;DPM3;DPP7;DPP8;DSE;DTD1;DTX3;DTYMK;DUSP10;DUSP2;DUSP3;DVL1;E2F1;E4F1;EAF1;ECI1;EDF1;EEF1D;EEF1G;EH;NDUFS8;NDUFV1;NF1;NME3;NME4;NOG;NPRL2;NRP1;NT5C;NTHL1;NUDT1;NUDT18;OGG1;OXSR1;P2RX7;PANK4;PAPSS1;PCYT2;PDE6G;PDK4;PEMT;PEX6;PFKFB2;PGM2;PHPT1;PICK1;PIGQ;PIK3C3;PIK3CB;PIK3CG;PIN1;PIPSK1A;PIPSK1B;PLA2G6;PLCD1;PMM1;PMVK;PNKP;POLR2F;POLR2G;POLR2I;POL

MAN1B1;MBLAC1;MCM7;METAP1D;MMP28;MOGS;MPG;MSH3;MST1;MTG1;MTM1;MTMR1;MUS81;MUTYH;MYH10;NAALADL1;NAGLU;NAPSA;NCEH1;NEIL1;NSF;NTSC;NTHL1;NUDT1;NUDT14;NUDT17;NUDT18;NUDT22;NUDT8;OGG1;PAFAH1B2;PAFAH1B3;PARK7;PCSK4;PDE6G;PEX6;PFKFB2;PGP;PHE

6;LATS1;LATS2;LEPRE1;LEPREL2;LTK;MAGI3;MAP3K10;MAP4K2;MAPK1;MAPK11;MATK;MCM7;MECR;MKI67;MMAB;MRPL23;MSH3;MTG1;MUT;MVD;MVK;MYH10;MYLK3;NDOR1;NDUFA13;NDUFV1;NME3;NME4;NMRAL1;NSF;NTSC;NUBP2;OGFOD2;OXSR1;P2RX6;P2RX7;P4HTM;PANK4;PAPSS1;PARS

.TK;MAGI3;MAP3K10;MAP4K2;MAPK1;MAPK11;MATK;MCM7;MECR;MKI67;MMAB;MRPL23;MSH3;MTG1;MVD;MVK;MYH10;MYLK3;NDOR1;NDUFA13;NDUFV1;NME3;NME4;NMRAL1;NSF;NTSC;NUBP2;OXSR1;P2RX6;P2RX7;PANK4;PAPSS1;PARS2;PDE6G;PDK4;PEX6;PFKFB2;PHKG1;PIK3C3;PIK3CB;PIK3C

.TK;MAGI3;MAP3K10;MAP4K2;MAPK1;MAPK11;MATK;MCM7;MECR;MKI67;MMAB;MRPL23;MSH3;MTG1;MVD;MVK;MYH10;MYLK3;NDOR1;NDUFA13;NDUFV1;NME3;NME4;NMRAL1;NSF;NT5C;NUBP2;OXSR1;P2RX6;P2RX7;PANK4;PAPSS1;PARS2;PDE6G;PDK4;PEX6;PFKFB2;PHKG1;PIK3C3;PIK3CB;PIK3C

VK;NAGLU;NAGS;NCOA3;NDUFA11;NDUFA13;NDUFA3;NDUFA8;NDUFB10;NDUFB11;NDUFB7;NDUFB8;NDUFB9;NDUFS6;NDUFS7;NDUFS8;NDUFV1;NF1;NME3;NME4;NOSIP;NT5C;NTHL1;NUDT1;NUDT18;NUP153;OGG1;PANK4;PAOX;PAPSS1;PARS2;PCYT2;PDK4;PEMT;PEX6;PFKFB2;PGM2;PHKB;PHKG1;

L13;RPL18;RPL18A;RPL28;RPL29;RPL38;RPL8;RPLP1;RPLP2;RPS15;RPS2;RPS28;S100A13;SCARB2;SEC22B;SEC24B;SENP2;SERGEF;SLC25A6;SNF8;SNX20;SOAT1;SOAT2;SPTBN4;SSNA1;SSR1;SSR4;STAM;STX1A;SYNGR1;SYTL1;THOC6;TIMM10;TIMM13;TIMM50;TLR7;TMED1;TMED3;TMSB4X;TNFRSF4;TNFSF1

PN;COL11A2;COL6A1;COL6A2;COMMD4;COMMD5;CORO6;CPSF2;CRB3;CREB3;CRELD2;CRYL1;CSNK1G1;CTSC;CTTNBP2NL;CTU2;CUEDC2;CUTA;CXorf40A;CYP2E1;DAAM1;DDX39A;DEAF1;DECR2;DERL3;DHRS4;DIAPH2;DLGAP5;DNAJC17;DNAJC30;DOK7;DPM3;DUSP2;DVL1;DYM;E2F1;E4F1;EAF1;EDF1;EEF

IF3;EIF3K;EIF4G3;ELF1;ELK3;ELP4;EPC1;ERCC1;ERLIN2;ERP29;ERP44;ETF1;ETV2;ETV3;EXOSC5;FANCG;FASTK;FBL;FBXL15;FBXL6;FBXO2;FBXO24;FBXW11;FBXW5;FEM1B;FICD;FKBP11;FKBP2;FLAD1;FNIP2;GEMIN7;GFER;GLYCTK;GNB2L1;GPBP1L1;GTF2A1;GTF2H2D;GTF3C5;GTPBP3;GYG1;H2AFJ;H2AFY2;H

F1;MACROD1;MAPK1;MC1R;MECR;MED1;MLST8;MMAB;MPG;MRI1;MTG1;MTM1;MTMR1;MUT;MUTYH;MVD;MVK;NAGLU;NAGS;NCEH1;NCOA3;NDOR1;NDUFA11;NDUFA13;NDUFA3;NDUFA8;NDUFB10;NDUFB11;NDUFB7;NDUFB8;NDUFB9;NDUFS6;NDUFS7;NDUFS8;NDUFV1;NF1;NME3;NME4;NOSIP;

BEPK;RAD21;RALGAPB;RBPMS;RFX3;RHOT2;RPL13;RPL18;RPL18A;RPL28;RPL29;RPL38;RPL8;RPL1;RPL2;RPS15;RPS2;RPS28;RSC1;S100A13;SCARB2;SEC22B;SEC24B;SEMA6A;SERGEF;SERPINF2;SLC17A9;SLC25A5;SLC25A6;SNF8;SPTBN4;SSNA1;SSR1;SSR4;STAM;STK25;STOML2;STX1A;SYNGR1;SYTL1;TA

1;SARS2;SETX;SPEG;SPHK2;STK25;TAOK3;TLK2;TNK1;TOP1;TOP2A;TOP3B;TPR;TRIB3;TRMU;TSSK6;TTN;TUT1;UBA7;UCK1;UCKL1;ULK3;VAR2;YME1L1;ZAI

IRPL12;MRPL20;MRPL23;MRPL24;MRPL38;MRPL52;MRPL54;MRPL55;MRPS11;MRPS12;MRPS15;MRPS18A;MRPS26;MRPS34;MSH3;MTM1;MUS81;MYH10;MYLIP;MYLK3;MZT2B;NCAPH;NCAPH2;NDOR1;NEIL1;NHP2;NLE1;NMRAL1;NOL12;NRP1;NSMCE1;NUBP2;NUP153;NUSAP1;OBFC1;P2RX6;PAFAH1B  
IRPL12;MRPL20;MRPL23;MRPL24;MRPL38;MRPL52;MRPL54;MRPL55;MRPS11;MRPS12;MRPS15;MRPS18A;MRPS26;MRPS34;MSH3;MTM1;MUS81;MYH10;MYLIP;MYLK3;MZT2B;NCAPH;NCAPH2;NDOR1;NEIL1;NHP2;NLE1;NMRAL1;NOL12;NRP1;NSMCE1;NUBP2;NUP153;NUSAP1;OBFC1;P2RX6;PAFAH1B  
1;RPS6KL1;RTEL1;SARS2;SETX;SPEG;SPHK2;STK25;TAOK3;TLK2;TNK1;TOP1;TOP2A;TOP3B;TPR;TRIB3;TRMU;TSSK6;TTN;TUT1;UBA7;UCK1;UCKL1;ULK3;VAR2;YME1L1;ZAI

);DUSP2;DUSP3;DVL1;E2F1;E4F1;EAF1;EDF1;EEF1D;EEF1G;EHHADH;EIF1;EIF2B2;EIF2B4;EIF3F;EIF3G;EIF3I;EIF3K;EIF4G3;ELF1;ELK3;ELP4;EPC1;ERCC1;ERLIN2;ERP29;ERP44;ETF1;ETV2;ETV3;EXOSC5;FANCG;FASTK;FBL;FBXL15;FBXL6;FBXO2;FBXO24;FBXO44;FBXW11;FBXW5;FEM1B;FICD;FKBP11;FKBP2;FLA

1;RPS6KL1;RTEL1;SARS2;SETX;SPEG;SPHK2;STK25;TAOK3;TLK2;TNK1;TOP1;TOP2A;TOP3B;TPR;TRIB3;TRMU;TSSK6;TTN;TUT1;UBA7;UCK1;UCKL1;ULK3;VAR2;YME1L1;ZAI

AF6;TRIB3;TRIP12;TTN;UBQLN1;UBXN1;WIBG;WNT7A;ZBTB17;ZEB2;ZFP91;Z

IA;WASH3P;WDR24;YIPF5;YWHAZ;Z;  
C19orf57;C19orf60;C1orf86;C1QBP;C1QTNF6;C8G;CANX;CAPN10;CAPRIN1;CAPS;CBR1;CCDC101;CCDC130;CCDC288;CCDC47;CCNL2;CCS;CD320;CD36;CD38;CD88;CDC25A;CDC6;CDCA8;CDK10;CDK12;CDK13;CDYL2;CEL;CELF2;CELF6;CENPF;CENPT;CHD7;CHMP4A;CHMP6;CHRA1;CHTF18;CIB1;CISD3;CL

IK3C3;PIK3CB;PIK3CG;PIPSK1A;PIPSK1B;PIPSK1L1;PMVK;PNKP;PRKAR2A;QARS;RAB21;RAB25;RAB33A;RABEP2;RAC3;RECQL4;RHOC;RHOT2;ROCK2;RPS6KB2;RPS6KC1;RPS6KL1;RTEL1;SARS2;SEPT1;SETX;SPEG;SPHK2;STK25;TAOK3;TLK2;TNK1;TOP1;TOP2A;TOP3B;TPR;TRIB3;TRMU;TSSK6;TTN;TUBB6;TUFM;

;UBQLN1;UBXN1;UCKL1;USE1;VKORC1;YIPF5;ZFAND2B;ZFYVE27;

Z

:3CG;PIPSK1A;PIPSK1B;PIPSK1L;PMVK;PNKP;PRKAR2A;QARS;RAB21;RAB25;RAB33A;RABEP2;RAC3;RECQL4;RHOC;RHOT2;ROCK2;RPS6KB2;RPS6KC1;RPS6KL1;RTEL1;SARS2;SEPT1;SETX;SPEG;SPHK2;STK25;TAOK3;TLK2;TNK1;TOP1;TOP2A;TOP3B;TPR;TRIB3;TRMU;TSSK6;TTN;TUBB6;TUFM;TUT1;UBA7;UCK:  
#H10;MYLK3;NDOR1;NDUFA13;NDUFV1;NME3;NME4;NRP1;NSF;NUBP2;OGFOD2;OXSR1;P2RK6;P2RX7;P4HTM;PANK4;PAPSS1;PARS2;PCOLCE;PDE6G;PDK4;PEX6;PFKFB2;PHKG1;PHLDA3;PIK3C3;PIK3CB;PIK3CG;PIN1;PIPSK1A;PIPSK1B;PIPSK1L;PLEKHA4;PMVK;PNKP;PPOX;PRKAR2A;QARS;RAB21;RAB25;R  
\*5K1A;PIPSK1B;PIPSK1L;PMVK;PNKP;QARS;RAB21;RAB25;RAB33A;RABEP2;RAC3;RECQL4;RHOC;RHOT2;ROCK2;RPS6KB2;RPS6KC1;RPS6KL1;RTEL1;SARS2;SEPT1;SETX;SPEG;SPHK2;STK25;TAOK3;TLK2;TNK1;TOP1;TOP2A;TOP3B;TPR;TRIB3;TRMU;TSSK6;TTN;TUBB6;TUFM;TUT1;UBA7;UCK1;UCKL1;ULK3;VA  
\*5K1A;PIPSK1B;PIPSK1L;PMVK;PNKP;QARS;RAB21;RAB25;RAB33A;RABEP2;RAC3;RECQL4;RHOC;RHOT2;ROCK2;RPS6KB2;RPS6KC1;RPS6KL1;RTEL1;SARS2;SEPT1;SETX;SPEG;SPHK2;STK25;TAOK3;TLK2;TNK1;TOP1;TOP2A;TOP3B;TPR;TRIB3;TRMU;TSSK6;TTN;TUBB6;TUFM;TUT1;UBA7;UCK1;UCKL1;ULK3;VA  
\*5K1A;PIPSK1B;PIPSK1L;PMVK;PNKP;QARS;RAB21;RAB25;RAB33A;RABEP2;RAC3;RECQL4;RHOC;RHOT2;ROCK2;RPS6KB2;RPS6KC1;RPS6KL1;RTEL1;SARS2;SEPT1;SETX;SPEG;SPHK2;STK25;TAOK3;TLK2;TNK1;TOP1;TOP2A;TOP3B;TPR;TRIB3;TRMU;TSSK6;TTN;TUBB6;TUFM;TUT1;UBA7;UCK1;UCKL1;ULK3;VA  
;PIPSK1B;PIPSK1L;PMVK;PNKP;QARS;RAB21;RAB25;RAB33A;RABEP2;RAC3;RECQL4;RHOC;RHOT2;ROCK2;RPS6KB2;RPS6KC1;RPS6KL1;RTEL1;SARS2;SEPT1;SETX;SPEG;SPHK2;STK25;TAOK3;TLK2;TNK1;TOP1;TOP2A;TOP3B;TPR;TRIB3;TRMU;TSSK6;TTN;TUBB6;TUFM;TUT1;UBA7;UCK1;UCKL1;ULK3;VARS2;YI

2B4;EIF3F;EIF3G;EIF3I;EIF3K;EIF4G3;ELF1;ELK3;ERCC1;ERI3;ETF1;ETNK2;ETV2;ETV3;EXD3;EXOSC5;FADS3;FANCG;FASTK;FBL;FDXR;FICD;FIGNL2;FKBP11;FKBP2;FLAD1;FPGS;FUK;GCDH;GFER;GIMAP5;GLYCTC;GNAI3;GPBP1L1;GTF2A1;GTF3C5;GTPBP3;GTPBP6;H2AFJ;H2AFY2;HBP1;HELZ;HES6;HES7;HINFP;H  
I;DYM;E2F1;E4F1;EAF1;EDF1;EEF1A2;EEF1D;EHHADH;EIF3G;EIF3K;ELF1;ELK3;ELP4;EPC1;ERCC1;ETV2;ETV3;EXOSC5;FAM53A;FANCG;FBL;FBXO38;FBXW11;FEM1B;FIBP;FNIP2;FSD1;GADD45G1P1;GCHFR;GEMIN7;GHDC;GLTSCR2;GNB2L1;GOLPH3;GPBP1L1;GTF2A1;GTF2H2D;GTF3C5;GTPBP3;H2AFJ;H2AFY2;

\*5K1A;PIPSK1B;PIPSK1L;PMVK;PNKP;QARS;RAB21;RAB25;RAB33A;RABEP2;RAC3;RECQL4;RHOC;RHOT2;ROCK2;RPS6KB2;RPS6KC1;RPS6KL1;RTEL1;SARS2;SEPT1;SETX;SPEG;SPHK2;STK25;TAOK3;TLK2;TNK1;TOP1;TOP2A;TOP3B;TPR;TRIB3;TRMU;TSSK6;TTN;TUBB6;TUFM;TUT1;UBA7;UCK1;UCKL1;ULK3;VA

BBX;BCAS2;BCL2L15;BCLAF1;BDP1;BHLHB9;BIN1;BIRC2;BIRC3;BLOC1S2;BLZF1;BMI1;BNIP1;BNIP2;BNIP3L;BNIPL;BRCA2;BRCC3;BRIP1;BRMS1;BRMS1L;BRWD1;BTAF1;BTBD10;BTD;BUD13;BYSL;C11orf1;C11orf49;C11orf54;C12orf52;C14orf166;C8orf40;C8orf58;C9orf72;CABIN1;CALB1;CALML6;CAMK1;CA  
ID34B;ANKRD49;ANLN;ANOS;ANP32E;ANXA1;AP1AR;AP1B1;AP1S2;AP2A2;AP3M1;AP3S2;AP4S1;APC;APEH;APEX1;APEX2;APH1A;APIS;APLF;APBP2;APPL1;APTX;AQP11;ARAF;ARF4;ARFGAP1;ARFGAP2;ARFGEF2;ARFIP1;ARG2;ARGLU1;ARHGAP22;ARHGF2;ARID2;ARID4A;ARID4B;ARID5A;ARID5B;ARL13E  
ID34B;ANKRD49;ANLN;ANOS;ANP32E;ANXA1;AP1AR;AP1B1;AP1S2;AP2A2;AP3M1;AP3S2;AP4S1;APC;APEH;APEX1;APEX2;APH1A;APIS;APLF;APBP2;APPL1;APTX;AQP11;ARAF;ARF4;ARFGAP1;ARFGAP2;ARFGEF2;ARFIP1;ARG2;ARGLU1;ARHGAP22;ARHGF2;ARID2;ARID4A;ARID4B;ARID5A;ARID5B;ARL13E  
;C;ANKRD26;ANKRD28;ANKRD32;ANKRD34B;ANKRD49;ANLN;ANOS;ANP32E;ANXA1;AP1AR;AP1B1;AP1S2;AP2A2;AP3M1;AP3S2;AP4S1;APC;APEH;APEX1;APEX2;APH1A;APIS;APLF;APOBEC3D;APBP2;APPL1;APTX;AQP11;ARAF;ARF4;ARFGAP1;ARFGAP2;ARFGEF2;ARFIP1;ARG2;ARGLU1;ARHGAP22;ARHGE  
;C;ANKRD26;ANKRD28;ANKRD32;ANKRD34B;ANKRD49;ANLN;ANOS;ANP32E;ANXA1;AP1AR;AP1B1;AP1S2;AP2A2;AP3M1;AP3S2;AP4S1;APC;APEH;APEX1;APEX2;APH1A;APIS;APLF;APOBEC3D;APBP2;APPL1;APTX;AQP11;ARAF;ARF4;ARFGAP1;ARFGAP2;ARFGEF2;ARFIP1;ARG2;ARGLU1;ARHGAP22;ARHGE  
2;ALG3;ALG6;ALKBH4;ALKBH5;ALKBH8;ALS2CR8;AMD1;ANAPC10;ANG;ANKLE1;ANKMY2;ANKRD12;ANKRD13C;ANKRD26;ANKRD28;ANKRD32;ANKRD34B;ANKRD49;ANLN;ANOS;ANP32E;ANXA1;AP1AR;AP1B1;AP1S2;AP2A2;AP3M1;AP3S2;AP4S1;APC;APEH;APEX1;APEX2;APH1A;APIS;APIP;APLF;APOBEC3  
1;ANAPC10;ANKRD12;ANKRD13C;ANKRD34B;ANLN;ANOS;ANP32E;ANXA1;AP1AR;AP1B1;AP1S2;AP2A2;AP3M1;AP3S2;AP4S1;APC;APEH;APEX1;APEX2;APH1A;APIS;APIP;APLF;APOBEC3D;APBP2;APPL1;APTX;AQP11;ARAF;ARAP2;ARF4;ARFGAP1;ARFGAP2;ARFGEF2;ARFIP1;ARG2;ARHGAP10;ARHGAP11A  
2;ALG3;ALG6;ALKBH4;ALKBH5;ALKBH8;ALS2CR8;AMD1;ANAPC10;ANG;ANKLE1;ANKMY2;ANKRD12;ANKRD13C;ANKRD26;ANKRD28;ANKRD32;ANKRD34B;ANKRD49;ANLN;ANOS;ANP32E;ANXA1;AP1AR;AP1B1;AP1S2;AP2A2;AP3M1;AP3S2;AP4S1;APC;APEH;APEX1;APEX2;APH1A;APIS;APIP;APLF;APOBEC3  
LD0A;ALG1;ALG10;ALG10B;ALG11;ALG13;ALG2;ALG3;ALG6;ALKBH4;ALKBH5;ALKBH8;ALS2CR8;AMD1;ANAPC10;ANG;ANGPT1;ANKLE1;ANKMY2;ANKRD12;ANKRD13C;ANKRD26;ANKRD28;ANKRD32;ANKRD34B;ANKRD49;ANLN;ANOS;ANP32E;ANXA1;AP1AR;AP1B1;AP1S2;AP2A2;AP3M1;AP3S2;AP4S1;A  
LD0A;ALG1;ALG10;ALG10B;ALG11;ALG13;ALG2;ALG3;ALG6;ALKBH4;ALKBH5;ALKBH8;ALS2CR8;AMD1;ANAPC10;ANG;ANGPT1;ANKLE1;ANKMY2;ANKRD12;ANKRD13C;ANKRD26;ANKRD28;ANKRD32;ANKRD34B;ANKRD49;ANLN;ANOS;ANP32E;ANXA1;AP1AR;AP1B1;AP1S2;AP2A2;AP3M1;AP3S2;AP4S1;A  
PIP;APLF;APOBEC3D;APBP2;APPL1;AQP11;ARAF;ARAP2;ARF4;ARFGAP1;ARFGAP2;ARFGEF2;ARFIP1;ARG2;ARHGAP10;ARHGAP11A;ARHGAP22;ARHGAP5;ARHGDI1;ARHGFE2;ARL2;ARL6P1;ARL6IP5;ARL8B;ARMC1;ARMC10;ARRB1;ARSA;ARSK;ASNA1;ASPH;ASTL;ATAD1;ATAD3A;ATG12;ATG4C  
RSK;ASNA1;ASPH;ASPM;ATAD1;ATAD3A;ATF1;ATF2;ATG9A;ATL2;ATP10D;ATP11B;ATP11C;ATP2C1;ATP5C1;ATP5E;ATP5F1;ATP5I;ATP5J;ATP5O;ATP6AP1;ATP6V1G1;ATP7A;ATP8A1;ATPAF2;ATRX;ATXN7L3;AUH;AURKC;AZI1;B2M;B3GALNT1;B3GALT2;B3GALT1;B3GNT1;B3GNT2;B3GNT5;B4GALT3;B4GALT  
5ALT6;BACH1;BAG2;BAG4;BAG6;BANF1;BAP1;BAZ1A;BAZ2B;BBS10;BBS12;BBX;BCAS2;BCLAF1;BCR;BDP1;BIRC2;BLOC1S2;BLZF1;BMI1;BMP1A;BMPR2;BNIP3L;BRCA2;BRCC3;BRD9;BRIP1;BRMS1;BRMS1L;BRWD1;BTAF1;BTBD1;BUD13;BZW1;C10orf2;C12orf52;C14orf166;C1GALT1;CAB39;CALCRL;CAMK1  
RSK;ASNA1;ASPH;ASPM;ATAD1;ATAD3A;ATF1;ATF2;ATG9A;ATL2;ATP10D;ATP11B;ATP11C;ATP2C1;ATP5C1;ATP5E;ATP5F1;ATP5I;ATP5J;ATP5O;ATP6AP1;ATP6V1G1;ATP7A;ATP8A1;ATPAF2;ATRX;ATXN7L3;AUH;AURKC;AZI1;B2M;B3GALNT1;B3GALT2;B3GALT1;B3GNT1;B3GNT2;B3GNT5;B4GALT3;B4GALT  
AP2;ARFGEF2;ARG2;ARGLU1;ARHGAP22;ARHGAP5;ARHGFE2;ARID2;ARID4A;ARID4B;ARID5A;ARID5B;ARL2;ARL8B;ARPP19;ARRB1;ARSA;ARSK;ARV1;ASAP3;ASB13;ASB7;ASF1A;ASGR2;ASNSD1;ASPH;ASTE1;ATAD1;ATAD2;ATF1;ATF2;ATG12;ATG16L2;ATG4A;ATG4B;ATG4C;ATG5;ATG9A;ATL2;ATP2B1;ATP2  
;CDC25C;CDC26;CDC27;CDC37;CDK1;CDK11A;CDK11B;CDK17;CDK18;CDK2;CDK5R1;CDK5RAP3;CDK7;CDK9;CDK11;CDKN1B;CDKN1C;CDKN2C;CDKN3;CENPE;CHCHD4;CHFR;CHM;CHORDC1;CHUK;CISH;CKS1B;CKS2;CLIP3;CLK1;CLK3;CLK4;CLN3;CLN5;CLN6;CNPPD1;COG3;COL4A3BP;COP52;COP54;C  
BCEC3D;APTX;ARAF;ARAP2;ARF4;ARFGAP1;ARFGAP2;ARG2;ARGLU1;ARHGAP22;ARHGAP5;ARHGF2;ARID2;ARID4A;ARID4B;ARID5A;ARID5B;ARL2;ARL8B;ARPP19;ARRB1;ARSA;ARSK;ARV1;ASAP3;ASB13;ASB7;ASF1A;ASGR2;ASNSD1;ASPH;ASTE1;ASTL;ATAD2;ATF1;ATF2;ATG4A;ATG4B;ATG4C;ATG5;ATL2;C  
FG5;ATP7A;ATPBD4;ATRX;ATXN7L3;AUH;AURKC;AZIN1;B2M;B3GALNT1;B3GALT2;B3GALT1;B3GNT1;B3GNT2;B3GNT5;B4GALT3;B4GALT6;BACH1;BAG2;BAG4;BAG6;BANF1;BAP1;BAZ1A;BAZ2B;BBS10;BBS12;BBX;BCAS2;BCLAF1;BCR;BDP1;BIRC2;BLOC1S2;BLZF1;BMI1;BMP1A;BMPR2;BNIP3L;BRCA  
H1A;APIP;APLF;APOBEC3D;APTX;ARAF;ARAP2;ARF4;ARFGAP1;ARFGAP2;ARFGEF2;ARG2;ARGLU1;ARHGAP22;ARHGAP5;ARHGF2;ARID2;ARID4A;ARID4B;ARID5A;ARID5B;ARL2;ARL8B;ARPP19;ARRB1;ARSA;ARSK;ARV1;ASAP3;ASB13;ASB7;ASF1A;ASGR2;ASNSD1;ASPH;ASTE1;ASTL;ATAD1;ATAD2;ATF1;ATF  
ALKBH8;ANG;ANGPT1;ANGPTL4;ANGPTL7;ANKB1;ANKK1;ANKMY2;ANKRD13C;ANKRD28;ANKRD44;ANLN;ANXA1;AP1B1;AP2A2;AP3M1;APC;APEX1;APEX2;APH1A;APIS;APIP;APLF;APOBEC3D;APBP2;APPL1;APTX;ARAF;ARAP2;ARF4;ARFGAP1;ARFGAP2;ARFGEF2;ARFIP1;ARG2;ARHGAP10;ARHGAP12;ARH  
CHAF1A;CHAF1B;CHD9;CHFR;CHMP1A;CKS1B;CLIC4;CLK3;CLP1;COIL;COP52;COP54;COP55;COP56;CPSF1;CPSF6;CRBN;CREB1;CSNK1A1;CSNK2B;CST3;CTBP1;CTDNEP1;CUL2;CUTC;CXCC1;CYHR1;DACH1;DAPK3;DAXX;DBF4;DCAF13;DCLRE1A;DDB2;DDX11;DDX3X;DDX41;DDX50;DDX54;DEPDC1;DGCRC14;DG  
EX2;APH1A;APIP;APLF;APOBEC3D;APTX;ARAF;ARAP2;ARF4;ARFGAP1;ARFGAP2;ARFGEF2;ARG2;ARGLU1;ARHGAP22;ARHGAP5;ARHGF2;ARID2;ARID4A;ARID4B;ARID5A;ARID5B;ARL2;ARL8B;ARPP19;ARRB1;ARRDC3;ARSA;ARSK;ARV1;ASAP3;ASB13;ASB7;ASF1A;ASGR2;ASNSD1;ASPH;ASTE1;ASTL;ATAD1;A







NK1A1L;CSNK1G3;DAK;DAPK3;DCAKD;DCK;DDX11;DDX3X;DDX41;DDX50;DDX54;DDX59;DGKE;DGKZ;DHX30;DHX36;DHX40;DICER1;DMPK;DNA2;DNAH6;DNAJA1;DYRK1A;DYRK1B;DYRK2;EPHB3;EPHB6;ERCC2;ERN1;ETNK1;FANCM;FARS2;FARSA;FDXACB1;FER;FGFR4;FIGNL1;GAK;GK;GRK6;GRPEL2;GSS;GTF  
;CDK7;CDK8;CDK9;CDKN1B;CDKN1C;CDT1;CEBPA;CEBPG;CEBP2;CENPK;CEP290;CGGBP1;CHAF1A;CHAF1B;CHD1;CHD5;CHD9;CHMP1A;CHUK;CHURC1;CKAP2;CLP1;CMPK1;CNBP;CNOT2;CNOT3;CNOT6;CNOT7;CNOT8;COASY;COMMD6;COPS2;COP55;CPSF1;CRABP2;CRCP;CREB1;CREB5;CREBL2;CREBZF;CRI  
E16;ZNF

DR44;ZFYVE16;ZNF

NK1A1L;CSNK1G3;DAK;DAPK3;DCAKD;DCK;DDX11;DDX3X;DDX41;DDX50;DDX54;DDX59;DGKE;DGKZ;DHX30;DHX36;DHX40;DICER1;DMPK;DNA2;DNAH6;DNAJA1;DYRK1A;DYRK1B;DYRK2;EPHB3;EPHB6;ERCC2;ERN1;ETNK1;FANCM;FARS2;FARSA;FDXACB1;FER;FGFR4;FIGNL1;GAK;GK;GRK6;GSS;GTF2F2;GUI  
;DKN1B;CDKN1C;CDT1;CEBPA;CEBPG;CEBP2;CENPK;CEP290;CGGBP1;CHAF1A;CHAF1B;CHD1;CHD5;CHD9;CHMP1A;CHN2;CHUK;CHURC1;CKAP2;CLK1;CLK3;CLK4;CNBP;CNN3;CNOT2;CNOT3;CNOT6;CNOT7;CNOT8;COMMD6;COPS2;COP55;CRABP2;CREB1;CREB5;CREBL2;CREBZF;CRK;CRLF3;CRTC2;CRY1;CS  
;CDK9;CDKN1B;CDKN1C;CDT1;CEBPA;CEBPG;CEBP2;CENPK;CEP290;CGGBP1;CHAF1A;CHAF1B;CHD1;CHD5;CHD9;CHMP1A;CHUK;CHURC1;CKAP2;CLP1;CMPK1;CNBP;CNOT2;CNOT3;CNOT6;CNOT7;CNOT8;COASY;COMMD6;COPS2;COP55;CPSF1;CRABP2;CRCP;CREB1;CREB5;CREBL2;CREBZF;CRK;CRLF3;CR

;MD4;PSMD8;PSME1;PTEN;RAD17;RB1;RBBP8;RFC2;RFC3;RFC5;RFWD2;RHO;RPS27L;RPS6KB1;SKP2;TAF2;TFAP4;TJP3;TP63;TRIAP1;TUBG1;TUBG2;TUBGCP2;UBC;USP37;WE  
;CHMP2B;CLEC5A;CLEC6A;CLIP3;COG3;COG6;COL4A3BP;COLQ;COPE;COP21;CPSF1;CRIP1;CSK;CTDNEP1;CXCL10;DAB2IP;DBN1;DDOST;DENND1B;DENND4C;DERL1;DLG1;DLG4;DMAP1;DPH3;DYRK2;ECT2;EIF4E;EIF5A2;ENY2;EPB41L5;EPS15;ERBB2IP;EXOC1;EXOC3;EXOC5;EXOC6;EXOC8;EXPH5;F2R  
P3;CDK7;CDK9;CDK11;CDKN1B;CDKN2C;CDKN3;CDS1;CENPE;CEPT1;CERS5;CHN2;CHORDC1;CHUK;CKS1B;CKS2;CLIP3;CLK1;CLK3;CLK4;CLN3;CMAHP;CMPK1;CNN3;CNP;CNPPD1;COASY;COL4A3BP;CREB1;CREBL2;CRIPAK;CRK;CRLS1;CSGALNACT1;CSK;CSNK1A1;CSNK2B;CTBP1;CTDNEP1;CTDSP1;CT  
B;CDKN1C;CDT1;CEBPA;CEBPG;CEBP2;CENPK;CEP290;CGGBP1;CHAF1A;CHAF1B;CHD1;CHD5;CHD9;CHMP1A;CHUK;CHURC1;CKAP2;CLP1;CMPK1;CNBP;CNOT2;CNOT3;CNOT6;CNOT7;CNOT8;COASY;COMMD6;COPS2;COP55;CPSF1;CRABP2;CRCP;CREB1;CREB5;CREBL2;CREBZF;CRK;CRLF3;CRTC2;CRY1;CTB

;MD4;PSMD8;PSME1;PTEN;RAD17;RB1;RBBP8;RFC2;RFC3;RFC5;RFWD2;RHO;RPS27L;RPS6KB1;SKP2;TAF2;TFAP4;TJP3;TP63;TRIAP1;TUBG1;TUBG2;TUBGCP2;UBC;USP37;WEE1;ZNF  
;N;PTGS2;RAD17;RASSF1;RB1;RBBP8;RFC2;RFC3;RFC5;RFWD2;RHEB;RINT1;RPS27L;RPTOR;RRP8;SART1;SESN1;SIPA1;SKIL;STRADA;TAOK1;TFAP4;TGFBR1;THAP5;TIPL1;TP53INP1;TP63;TRIAP1;TSC2;TTK;UBC;UBE2D1;UBE2E1;UHMK1;USP44;WEE1;ZWIL

;SLC40A1;SLC9A6;SNX10;SNX13;SNX16;SNX17;SNX18;SNX2;SNX25;SNX3;SNX4;SNX8;SPAST;STAM2;STARD3;STARD3NL;STEAP2;STX7;TAB1;TAB2;TAB3;TBK1;TFRC;TICAM1;TLR8;TMEM106B;TMEM184A;TMEM55A;TOM1;TPT1;TRIM3;UBC;UBE2D3;UNC13D;USP6;VAC14;VAMP4;VAMP7;VPS18;VPS26A;VP

;WIL4;PLCB1;PLK1S1;PMF1;PMS1;PPP1CC;PPP1R2A;PPP5C;PSMD13;PTEN;RAD51B;RAD51C;RANGAP1;RB1;RBBP8;RBM7;RPS27;RRS1;SEC13;SENP6;SEPT7;SETDB2;SGOL2;SIRT2;SKA2;SMC2;SMC4;SMC5;SPAG5;SPIRE2;SSSCA1;STAG1;STAG2;SUV39H2;SYCP2;SYCP3;TAOK1;TGFA;TTK;TTYH1;TUBG1;TXNL

IAP3K2;MAP3K7;MAP3K8;MAP4K1;MAP4K3;MAP4K5;MAPK6;MAPK8;MAPKAP2;MAPKAPK3;MARK4;MAST2;MAST4;MNAT1;MST4;MYLK4;N4BP2;NADK1;NEK1;NEK7;NLK;NME7;PAK4;PAN3;PANK1;PANK3;PBK;PDIK1L;PDK1;PDK2;PDXK;PFKL;PFKM;PGM2L1;PHKG2;PI4K2B;PIK3C2A;PIK3CA;PIKFYVE;PKT  
40A;RAB10;RABEP1;RALA;RAS1;RB1;RBBP8;ROCK1;SEPT10;SEPT14;SEPT7;SEPT9;SETDB2;SGOL2;SIRT2;SKA2;SMC2;SMC5;SPAG5;SPAST;SPIRE2;SSSCA1;STAG1;STAG2;SYCP2;SYCP3;TGFA;TUBA1B;USP16;USP37;USP44;VEGFA;VEGFB;VPS4A;VPS4B;VRK1;WAPAL;WEE1;ZNF830;ZWIL

;DIS3;DNA2;DNAJB2;DNAJB9;DNAJC10;DNASE1L1;DNASE2;ECH1;ECHS1;ECT2;EDEM3;EEFSEC;EIF3E;EIF4E;EIF5;ELMOD2;ENDOG;EPHB3;ERCC2;ERCC8;ERLEC1;ERLIN1;FBXL3;FBXL4;FBXL5;FBXO11;FBXO31;FBXO4;FBXO45;FBXO5;FBXO8;FBXW4;FBXW7;FGD2;FGD3;FGD4;FUCA1;FUT4;GAA;GALC;GALE;GAP

;MAST2;MAST4;MNAT1;MST4;MYLK4;NEK1;NEK7;NLK;PAK4;PAN3;PBK;PDIK1L;PDK1;PDK2;PHKG2;PIK3CA;PKN1;PKN2;PLK4;POLR2E;PPP4C;PRKAA1;PRKAB2;PRKACB;PRKCI;PRKC2;PRKD3;PRPF4B;PSKH1;PTK6;PTK7;RABEP1;RET;RIOK2;RIPK2;RIPK3;ROCK1;RPS6KA3;RPS6KA4;RPS6KA5;RPS6KB1;RYK;SCYL1

;CDK2;CDK5R1;CDK5RAP3;CDK7;CDK8;CDK9;CDKN1B;CDKN1C;CDT1;CEBPA;CEBPG;CEBP2;CENPK;CEP290;CGGBP1;CHAF1A;CHAF1B;CHD1;CHD5;CHD9;CHMP1A;CHUK;CHURC1;CKAP2;CLP1;CMPK1;CNBP;CNOT2;CNOT3;CNOT6;CNOT7;CNOT8;COASY;COMMD6;COPS2;COP55;CPSF1;CRABP2;CRCP;CREB1;

;A4;RPTOR;SIRT1;SPAG16;SPAG9;SREBF1;STK11IP;STRADA;TAX1BP1;TFPT;TGFBR2;TICAM1;TMEM173;TOLLIP;TPRKB;TRPV4;TW2;USP2  
MAP4K3;MAP4K5;MAPK6;MAPK8;MAPKAPK2;MAPKAPK3;MARK4;MAST2;MAST4;MNAT1;MST4;MYLK4;N4BP2;NADK1;NEK1;NEK7;NLK;PAK4;PAN3;PANK1;PANK3;PBK;PDIK1L;PDK1;PDK2;PDXK;PFKL;PFKM;PGM2L1;PHKG2;PI4K2B;PIK3C2A;PIK3CA;PIKFYVE;PKN1;PKN2;PLK4;POLR2E;PPP4C;PRKAA1;PRK  
ANGAP1;RBCK1;RPGR;RPH3AL;RPL11;RPL15;RPL17;RPL23;RPL26;RPL26L1;RPL27;RPL30;RPL31;RPL34;RPL35;RPL36A;RPL39;RPL41;RPL7;RPL9;RPS15A;RPS24;RPS27;RPS29;RPS3A;RPS7;SAR1A;SAR1B;SEC11A;SEC11C;SEC13;SEC23A;SEC24A;SEC61A1;SEC62;SERAC1;SIL1;SIRT1;SLU7;SMAD4;SNX13;SNX16;S

P1;MARCH5;MATR3;MCL1;MCU;MDH2;MFF;MFN1;MIB1;MPV17;MRPL19;MSTO1;MTHFD2L;MTMR6;MTX2;MTX3;NDUFA1;NDUFA4;NDUFA5;NDUFA6;NDUF1A;NDUF1B;NDUF13;NDUF15;NDUF16;NDUF17;NDUF18;NDUF19;NDUF20;NDUF21;NDUF22;NDUF23;NDUF24;NDUF25;NDUF26;NDUF27;NDUF28;NDUF29;NDUF30;NDUF31;NDUF32;NDUF33;NDUF34;NDUF35;NDUF36;NDUF37;NDUF38;NDUF39;NDUF40;NDUF41;NDUF42;NDUF43;NDUF44;NDUF45;NDUF46;NDUF47;NDUF48;NDUF49;NDUF50;NDUF51;NDUF52;NDUF53;NDUF54;NDUF55;NEK1;NIPSNAP1;NOC4L;NRM;NUCB2;NUP37;NUP54;NUP62CL;NUP85;OMA1;OPA1;PA  
;RANGAP1;RBCK1;RNF139;RPL11;RPL15;RPL17;RPL23;RPL26;RPL26L1;RPL27;RPL30;RPL31;RPL34;RPL35;RPL36A;RPL39;RPL41;RPL7;RPL9;RPS15A;RPS24;RPS27;RPS29;RPS3A;RPS7;RYR1;SAR1A;SAR1B;SCFD1;SCYL2;SEC11A;SEC11C;SEC13;SEC23A;SEC24A;SEC61A1;SIRT1;SLC30A6;SMAD4;SMG1;SMG5;SN

;PNMA3;POLR1E;PPP1CA;PPP1CB;PPP1CC;PWP2;RASL11A;RBBP6;RBM34;RBM4;RECQL5;REXO4;RPF1;RPF2;RPL11;RPL23;RPL35;RPL9;RPS24;RPS3A;RPS7;RRP1;RRP36;RRP8;RRS1;RSL24D1;RSPH4A;SEPT7;SIRT1;SKIV2L2;SLC30A5;SMARCA5;SMARCB1;SRP19;STAU2;STX16;SUB1;SURF6;TAF13;TAF1A;TBCA;

I;RPL35;RPL36A;RPL36AL;RPL39;RPL39L;RPL41;RPL7;RPL9;RPS15A;RPS24;RPS27;RPS27L;RPS29;RPS3A;RPS6KA3;RPS6KB1;RPS7;SARNP;SEC11A;SEC11C;SELT;SEPS2;SERP1;SPCS2;SPCS3;SRP14;SRP19;SRP9;SSR3;TACO1;TARS2;TIA1;TRAM1;UHMK1;UPF1;USP16;VARS;W  
;FBXW7;FCER1A;FEM1A;FER;FGF7;FGFR1OP;FGFR4;FMR1;FNIP1;FNTA;FRS2;FXR1;GAB1;GAPDH;GAS6;GFPT1;GIPC1;GMFB;GPS1;GPS2;GSTP1;GTF2H1;GUF1;HDAC6;HRSP12;HSPBP1;IBTK;IDE;IFT52;IFT88;IGBP1;IGF2BP3;IKBK;IL12A;IL15;IL6ST;IL8;ILK;IMPACT;INPP5K;IREB2;ITCH;ITGA1;JAK2;JUN;KAT2B;P  
SLC25A46;SPNS1;TIMM17A;TIMM22;TIMM23;TIMM8B;TMEM201;TMEM70;TMPO;UCP2;UCP3;UNC50;UQCRB;UQCRC1;UQCRC2;UQCRH;UQC  
P1;MARCH5;MATR3;MCL1;MCU;MDH2;MFF;MFN1;MIB1;MPV17;MRPL19;MSTO1;MTHFD2L;MTMR6;MTX2;MTX3;NDUFA1;NDUFA4;NDUFA5;NDUFA6;NDUFAF1;NDUFB1;NDUFB3;NDUFB5;NDUFS2;NDUFS4;NDUFS5;NEK1;NIPSNAP1;NOC4L;NRM;NUCB2;NUP37;NUP54;NUP62CL;NUP85;OMA1;OPA1;PA  
R4;CBWD1;CBWD2;CCBL2;CCT2;CCT6;CDC7;CDK1;CDK11A;CDK11B;CDK18;CDK2;CDK7;CDK8;CDK9;CDK11;CDK12;CENPE;CFH;CHD1;CHD5;CHD9;CHST14;CHUK;CKB;CLCN7;CLK1;CLK3;CLK4;CLP1;CMPK1;COASY;CPNE1;CRABP2;CSK;CSNK1A1;CSNK1A1L;CSNK1G3;CXCL6;DAK;DAPK3;DAPP1;DBI;DCA  
\NF19A;RPGR;RSPH4A;SASS6;SENP6;SKA2;SLAIN2;SPAG5;SPAST;SPIRE2;SS18;TBCD;TPPP3;TRPV4;TTK;TLL1;TUBA1B;TUBD1;TUBE1;TUBG1;TUBG2;TUBGCP2;WEE1;XPI  
EAS;MORC3;MPP5;MTX2;MTX3;MZT1;NAGPA;NAPB;NAPG;NCKIPSD;NEDD4;NFASC;NFKBIE;NIN;NME7;NOP58;NUP54;PACS2;PAN3;PAX6;PE51;PEX1;PEX12;PEX13;PEX14;PEX2;PEX3;PGAP1;PHIP;PIKFYVE;PKD2;PKIA;PMAIP1;PMPCA;PPP2R5A;PPP3CA;PRKCI;PRKCZ;PSMD10;PTGS2;RAB10;RAB3GAP2;RAB  
T1;RNF144B;RPS6KB1;SDHD;SFXN4;SHMT2;SLC24A6;SLC25A1;SLC25A10;SLC25A11;SLC25A22;SLC25A24;SLC25A3;SLC25A32;SLC25A33;SLC25A38;SLC25A40;SLC25A43;SLC25A46;SLC27A3;SPNS1;TIMM17A;TIMM22;TIMM23;TIMM8B;TMEM173;TMEM70;TOMM20;TOMM40;TOMM5;UCP2;UC  
BF1;SS18L1;SUPT5H;SUV39H2;SUZ12;SYCP3;TADA1;TAF12;TAF5;TAF7;TAF9;TBL1XR1;TET1;TLK1;TP63;UBE2A;UBE2E1;UBE2N;UBR5;USP16;USP21;VEGFA;VPS72;WDR5;ZMYN1  
OG3;COG4;COG6;COL4A3BP;COPE;COP21;CPSF1;CREBL2;CSK;CTNS;CXCL10;CYB5R4;DAB2IP;DDOST;DENND1B;DENND4C;DERL1;DMAP1;DPH3;DTNBP1;DYRK2;ECT2;EIF4E;EIF5A2;ENY2;EPS15;ERBB2IP;EXOC1;EXOC3;EXOC5;EXOC6;EXOC8;EXPH5;F2RL1;FABP5;FCER1A;FMR1;FOLR2;FYTTD1;G6PC3;GAS6;C  
\B2IP;DAGLB;DAPK3;DCP1A;DCP2;DCPS;DDB2;DDX3X;DECR1;DERL1;DHPS;DIS3;DNA2;DNAJB2;DNAJB9;DNAJC10;DNASE1L1;DNASE2;ECH1;ECHS1;ECT2;EDEM3;EEF3E;EIF3E;EIF4E;EIF5;ELMOD2;ENDOG;EPHB3;ERCC2;ERCC8;ERLEC1;ERLIN1;FBXL3;FBXL4;FBXL5;FBXO11;FBXO31;FBXO4;FBXO5;FB  
;HBS1L;HELLS;HLTF;IDE;IGHMBP2;KATNB1;KIF11;KIF18A;KIF20B;KIF22;KIF23;KIF27;KIF2A;KIF3A;KIF5B;KIFC1;KIFC3;KLC4;KRAS;LONP1;LONRF1;LRRK2;MCM5;MCM9;MFN1;MMAA;MNAT1;MOV10;MSH2;MYO1G;MYO5C;NBN;NKIRAS1;NRAS;NUBP1;OPA1;ORC4;PEX1;PMS1;POLQ;PPP2R4;PSMC1;PSMC2;P  
BP10;GTPBP2;GUF1;HBS1L;HELLS;HLTF;IDE;IGHMBP2;KATNB1;KIF11;KIF18A;KIF20B;KIF22;KIF23;KIF27;KIF2A;KIF3A;KIF5B;KIFC1;KIFC3;KLC4;KRAS;LHPP;LONP1;LONRF1;LRRK2;MCM5;MCM9;MFN1;MMAA;MNAT1;MOV10;MSH2;MYO1G;MYO5C;NBN;NKIRAS1;NRAS;NUBP1;NUDT12;NUDT16;OPA1;ORC  
EAS;MORC3;MPP5;MTX2;MTX3;MZT1;NAGPA;NAPB;NAPG;NCKIPSD;NEDD4;NFASC;NFKBIE;NIN;NME7;NOP58;NUP54;PACS2;PAN3;PAX6;PE51;PEX1;PEX12;PEX13;PEX14;PEX2;PEX3;PGAP1;PHIP;PIKFYVE;PKD2;PKIA;PMAIP1;PMPCA;PPP2R5A;PPP3CA;PRKCI;PRKCZ;PSMD10;PTGS2;RAB10;RAB3GAP2;RAB  
TF2H4;GTPBP10;GTPBP2;GUF1;HBS1L;HELLS;HLTF;IDE;IGHMBP2;KATNB1;KIF11;KIF18A;KIF20B;KIF22;KIF23;KIF27;KIF2A;KIF3A;KIF5B;KIFC1;KIFC3;KLC4;KRAS;LHPP;LONP1;LONRF1;LRRK2;MCM5;MCM9;MFN1;MMAA;MNAT1;MOV10;MSH2;MYO1G;MYO5C;NBN;NKIRAS1;NRAS;NUBP1;NUDT12;NUDT16;  
BP10;GTPBP2;GUF1;HBS1L;HELLS;HLTF;IDE;IGHMBP2;KATNB1;KIF11;KIF18A;KIF20B;KIF22;KIF23;KIF27;KIF2A;KIF3A;KIF5B;KIFC1;KIFC3;KLC4;KRAS;LHPP;LONP1;LONRF1;LRRK2;MCM5;MCM9;MFN1;MMAA;MNAT1;MOV10;MSH2;MYO1G;MYO5C;NBN;NKIRAS1;NRAS;NUBP1;NUDT12;NUDT16;OPA1;ORC  
11;TMEM173;TPRKB;TRPV4;TW2;USP3  
PS27L;RRP8;SENP6;SIRT2;SMCS;STAG2;TAOK1;TFAP4;TGFA;TIPRL;TJP3;TP63;TRIAP1;TTK;UBC;UBE2D1;UBE2E1;USP19;USP44;WAPAL;WEE1;XPO1;ZWIL

CC;PSEN2;RHOT1;RNF144B;RPS6KB1;SDHD;SFXN4;SHMT2;SLC24A6;SLC25A1;SLC25A10;SLC25A11;SLC25A22;SLC25A24;SLC25A3;SLC25A32;SLC25A34;SLC25A36;SLC25A38;SLC25A40;SLC25A43;SLC25A46;SLC27A3;SPNS1;SUOX;TIMM17A;TIMM22;TIMM23;TIMM8B;TMEM173;TMEM70;TOMM20;TOMM

IN7A;LLGL1;LNX1;LNX2;LONP1;MALT1;MAP3K1;MAPK8IP2;MCU;MDM2;MFF;MID1IP1;MITF;MKI67IP;MKKS;MNAT1;MPP6;MPP7;MSTO1;MTMR2;MUC20;NAPB;NAPG;NCK1;NDUFAF1;NDUFS4;NDUFSS;NUBPL;NUDT21;P2RX4;PARD6B;PDSS1;PEX13;PEX14;PFKL;PFKM;PFN2;PIK3C2A;PMAIP1;PPAT;PPP2R

IF;BMI1;BMP1;BMPR2;BNIP1;BNIP3L;BORA;BRCA2;BRCC3;BRD9;BRWD1;BYSL;C10orf2;C1QL3;C5orf30;CABIN1;CACNA1H;CACNB3;CACNB4;CAMK1;CAMK2D;CAPG;CAPZA1;CAPZA2;CASC5;CASP3;CASP8;CBLL1;CBR4;CBX3;CCDC103;CCDC39;CCDC88A;CCDC88B;CCNA2;CCNG1;CCNG2;CCP110;CCT2;CCT6B;

IN7A;LLGL1;LNX1;LNX2;LONP1;MALT1;MAP3K1;MAPK8IP2;MCU;MDM2;MFF;MID1IP1;MITF;MKI67IP;MKKS;MNAT1;MPP6;MPP7;MSTO1;MTMR2;MUC20;NAPB;NAPG;NCK1;NDUFAF1;NDUFS4;NDUFSS;NUBPL;NUDT21;P2RX4;PARD6B;PDSS1;PEX13;PEX14;PFKL;PFKM;PFN2;PIK3C2A;PMAIP1;PPAT;PPP2R

IBG2;URGI

I2;GSTP1;HACE1;HAUS7;HDAC3;HDAC5;HDAC6;HDAC7;HDAC9;HINT1;IBTK;IGBP1;ILK;INF2;ITGAV;JAK2;JKAMP;JUP;KAT2B;KAT8;KIAA1967;KIF11;KPNA2;LIPE;LLGL1;LONP1;LRPAP1;LRRK2;MALT1;MAP3K1;MAP3K11;MAP3K13;MAP3K2;MAPK6;MAPK8;MAPK8IP1;MAPK8IP2;MARCH5;MARCH6;MAST2;MD1;HMG2;HMG5;HMGXB4;HNF1A;HNRNP1;HSF1;HSF2;HSF4;HSF5;IFT57;IGHMBP2;IKZF2;IKZF5;IMPDH2;IRF5;JRK1;JUN;KIF22;KIN;KLF16;KLF3;KLF5;KLLN;LCOR;LCORL;LEMD3;LIG4;LIN28A;LIN54;LONP1;LRWD1;LUC7L3;MAF;MAF1;MCM5;MCM9;MED26;MEF2A;MEF2C;MEF2D;MEN1;MIER1;MIER2;MIEF

JRA;PURB;RAD17;RANGAP1;RB1;RBBP6;REV3L;RFC2;RFC3;RFC5;RGS12;RIF1;RING1;RNF2;RNF40;RRP8;RRS1;RUVBL2;SEC13;SEPT7;SETDB2;SFR1;SGOL2;SIPT1;SKA2;SMARCA5;SMARCAD1;SMARCB1;SMC2;SMC4;SMC5;SMC6;SMCHD1;SPAG5;SS18L1;STAG1;STAG2;SUMO3;SUV39H1;SUV39H2;SUZ12;SYCF

;TUBE1;TUBG1;TUBG2;URGI  
;TUBE1;TUBG1;TUBG2;URGI

CP3;UQCRB;UQCRC1;UQCRC2;UQCRH;UQCF

AP7;AKAP8L;AKIP1;AKIRIN1;AKR1B1;AKR7A2;AKT1;AKTIP;ALCAM;ALDH4A1;ALDOA;ALG1;ALG10;ALG10B;ALG11;ALG13;ALG2;ALG3;ALG6;ALKBH4;ALKBH5;ALKBH8;ALS2CR8;AMD1;AMMECR1;ANAPC10;ANG;ANGPT1;ANGPTL4;ANGPTL7;ANKAR;ANKLE1;ANKMY2;ANKRD12;ANKRD13C;ANKRD26;ANKRD28

31

AP5;AKAP7;AKAP8L;AKD1;AKIP1;AKR1B1;AKR7A2;AKT1;AKTIP;ALCAM;ALDH16A1;ALDH4A1;ALDOA;ALG1;ALG10;ALG10B;ALG11;ALG13;ALG2;ALG3;ALG6;ALKBH4;ALKBH5;ALKBH8;ALS2CR8;AMD1;AMMECR1;ANAPC10;ANG;ANGPT1;ANGPTL4;ANGPTL7;ANKIB1;ANKK1;ANKMY2;ANKRD13C;ANKRD28;ANI

;PLD2;PLD3;PLD4;PNKD;PNPLA2;PNPLA6;PNPLA8;PPEF1;PPM1B;PPM1G;PPP1CA;PPP1CB;PPP1CC;PPP1R15B;PPP1R3D;PPP2CB;PPP2R1A;PPP2R2A;PPP3CA;PPP3CB;PPP4C;PPP5C;PPP6C;PROCA1;PSMD14;PTEN;PTER;PTP4A1;PTPDC1;PTPN12;PTPN2;PTPN22;PTPN23;PTPN4;PTPN7;PTPRO;PTRH2;RAD51C;

;TDP2;TFEC;TMF1;TOB1;TONSL;TRIM28;UBE3A;USP16;USP21;YAF2;ZEB1;ZFX;ZHX1;ZNF136;ZNF281;ZN

3;TBC1D15;TBC1D22A;TBC1D23;TBC1D25;TBC1D4;TBC1D8B;TBCD;TRIM23;TSC2;UBA2;USP6;VAC1  
RCA5;SMARCAD1;SMC2;SMC4;SMC5;SMC6;SPAG5;SS18L1;STAG1;STAG2;SUMO3;SUV39H1;SUV39H2;SUZ12;SYCP2;SYN1;TFPT;TMPO;TNKS2;TONSL;TP63;TRIM28;UBE2A;UCHL5;UPF1;WAPAL;WDHD1;XPO1;ZFRANB3;ZWIL

GR;RTKN;SH3BP1;SIPA1;ST5;SYDE2;TBC1D10B;TBC1D12;TBC1D13;TBC1D15;TBC1D22A;TBC1D23;TBC1D25;TBC1D4;TBC1D8B;TBCD;TBXA2R;TSC2;USP6;WA

};CAPN14;CAPN7;CARD17;CASP3;CASP8;CCNH;CDADC1;CDC14A;CDC25C;CDK7;CDKN3;CENPE;CES4A;CGN;CHD1;CHD5;CHD9;CHID1;CHMP1A;CNOT6;CNOT6L;CNOT7;CNP;COPS5;CPD;CRBN;CTBS;CTDNEP1;CTDSP1;CTDSP2;CTSH;CTSO;CTSS;CTSW;CYCS;DAGLB;DAPP1;DCLRE1A;DCP1A;DCP2;DCPS;DCTN2

IC8B;RIN1;RP2;RPGR;RTKN;SH3BP1;SIPA1;ST5;SYDE2;TBC1D10B;TBC1D12;TBC1D13;TBC1D15;TBC1D22A;TBC1D23;TBC1D25;TBC1D4;TBC1D8B;TBCD;TBXA2R;TSC2;USP6;WA

IF773;ZNF7





THYN1;TICAM2;TOMM6;TRAPPC3;TRNAU1AP;UQCFS1;UXT;VDAC3;ZGLP1;ZNR

VDAC3;ZGLP1;ZNR  
THYN1;TICAM2;TOMM6;TRAPPC3;TRNAU1AP;UQCFS1;UXT;VDAC3;ZGLP1;ZNR

VDAC3;ZGLP1;ZNR

THYN1;TICAM2;TOMM6;TRAPPC3;TRNAU1AP;UQCFS1;UXT;VDAC3;ZGLP1;ZNR  
THYN1;TICAM2;TOMM6;TRAPPC3;TRNAU1AP;UQCFS1;UXT;VDAC3;ZGLP1;ZNR

IAU1AP;UQCFS1;USP42;UXT;ZGLP1;ZNR

;KPNA4;LILRB3;LIMD1;LITAF;LYN;MARCKS;MCTP2;MLLT11;MYO5A;NCOA1;NCOA2;NEDD9;NFE2;NFE2L2;NPTN;NR6A1;NUP50;NUPL1;OSM;OXER1;PAK2;PDE4B;PDK3;PDZD3;PDZD8;PELI2;PHB;PIAS1;PLAU;PLD1;PLXNC1;PPAP2B;PPP4R1;PROK2;PTPRE;RAB1A;RAB27A;RAB31;RANBP1;RAPGEF2;RASGRP4;R  
;KPNA4;LILRB3;LIMD1;LITAF;LYN;MARCKS;MCTP2;MLLT11;MYO5A;NCOA1;NCOA2;NEDD9;NFE2;NFE2L2;NPTN;NR6A1;NUP50;NUPL1;OSM;OXER1;PAK2;PDE4B;PDK3;PDZD3;PDZD8;PELI2;PHB;PIAS1;PLAU;PLD1;PLXNC1;PPAP2B;PPP4R1;PROK2;PTPRE;RAB1A;RAB27A;RAB31;RANBP1;RAPGEF2;RASGRP4;R  
IFE2L2;NPTN;NR6A1;NUP50;NUPL1;OSM;OXER1;PAK2;PDE4B;PDK3;PDZD3;PDZD8;PELI2;PHB;PIAS1;PLAU;PLD1;PLXNC1;PPAP2B;PPP4R1;PROK2;PTPRE;RAB1A;RAB27A;RAB31;RANBP1;RAPGEF2;RASGRP4;RASSF3;REPS2;RHOH;RNF111;ROPN1L;RS1;S100A11;SDCBP;SECTM1;SH3GLB1;SIT1;SLC8A1;SOCS3;  
L;KPNA4;LILRB3;LIMD1;LITAF;LYN;MARCKS;MCTP2;MLLT11;MYO5A;NCF4;NCOA1;NCOA2;NEDD9;NFE2;NFE2L2;NPTN;NR6A1;NUP50;NUPL1;OSM;OXER1;PAK2;PDE4B;PDK3;PDZD3;PDZD8;PELI2;PHB;PIAS1;PLAU;PLD1;PLXNC1;PPAP2B;PPP4R1;PROK2;PTPRE;RAB1A;RAB27A;RAB31;RANBP1;RAPGEF2;RASC  
LA;HMGR;HP;HPSE;HSPA6;IDH1;IFNAR1;IFNGR2;IGSF6;IL10RB;IL13RA1;IL18RAP;IL18;IL1R1;IL1R2;IL1RN;INHBB;IQGAP1;IRAK3;ITGAD;JMJD1C;KAL1;KLF6;KPNA1;KPNA4;LAMP2;LILRB3;LIMD1;LITAF;LYN;LYVE1;MCTP2;MLLT11;MME;MRV11;MYO10;MYO5A;NAIP;NCF4;NCOA1;NCOA2;NEDD9;NFE2;NFE2L2;

I1;LITAF;LYN;MCTP2;MLLT11;MME;MYOSA;NCOA1;NCOA2;NEDD9;NFE2L2;NPEPPS;NPTN;NR6A1;NUP50;NUPL1;OPLAH;OSM;OXER1;PAK2;PAPSS2;PDE4B;PDK3;PDZD3;PDZD8;PELI2;PHB;PIAS1;PLAU;PLD1;PLXNC1;POLD3;PPAP2B;PPP4R1;PROK2;PTPRE;RAB1A;RAB27A;RAB31;RANBP1;RAPGEF2;RASGRP4  
17;GPR84;GPR89A;GPR97;GRIP2;GSK3B;HAS1;HCAR2;HCAR3;HMGCR;HPSE;IFNAR1;IFNGR2;IGSF6;IL10RB;IL13RA1;IL18RAP;IL1R1;IL1R2;IL1RN;INPP5A;IQGAP1;ITGAD;ITM2B;ITPRIP;KAL1;KAZN;KCNE1;KCNH7;KCNJ15;KCNS1;KIAA0319;KPNA1;LAMP2;LBR;LILRA6;LILRB3;LITAF;LMNB1;LRG1;LRRC4;LYN;LYV  
VP3;INHBB;INPP5A;IQGAP1;IRAK3;ITM2B;JHDM1D;JMJD1C;KAL1;KCNE1;KCNS1;KIAA0319;KPNA1;LBR;LILRB3;LIMD1;LITAF;LMNB1;LMO4;LRRFIP1;LYN;MAK;MARCKS;MME;MPZL3;MRV1;MXD1;MYO10;MYO5A;NAIP;NCF4;NCOA1;NCOA2;NECAB2;NEDD9;NFE2;NFE2L2;NFYA;NHP2L1;NPTN;NR6A1;NRD1;

ER1;PAK2;PDE4B;PDZD3;PHB;PICALM;PLAU;PLB1;PLXNC1;PPAP2B;PTPRE;PVRL2;RAB27A;RAPGEF2;RASGRP4;RASSF3;RHOH;RS1;SDCBP;SECTM1;SHROOM4;SIT1;SLC12A6;SLC22A1;SLC22A14;SLC22A4;SLC26A8;SLC2A11;SLC8A1;SMAGP;SNAP23;SNTA1;SNTG2;ST3GAL5;STX3;STX6;TBC1D30;TGM3;TLR2;TL  
3;PHB;PICALM;PLAU;PLB1;PLXNC1;PPAP2B;PTPRE;PVRL2;RAB27A;RAPGEF2;RASGRP4;RASSF3;RHOH;RS1;SDCBP;SECTM1;SHROOM4;SIT1;SLC12A6;SLC22A1;SLC22A14;SLC22A4;SLC26A8;SLC2A11;SLC8A1;SMAGP;SNAP23;SNTA1;SNTG2;ST3GAL5;STX3;STX6;TBC1D30;TGM3;TLR2;TLR4;TLR5;TM9SF2;TNFR  
REM1;TRIB1;UIMC1;USP3;WAC;WNT10B;ZAK;ZFP

T1;FOXO3;FPR1;FPR2;FRMD4B;FYB;GCM1;GIMAP1;GNAQ;GPR141;GPR17;GPR89A;GPR97;GPSM2;GRIP2;GSK3B;GTSE1;H3F3B;HAS1;HCAR2;HCAR3;HEY1;HIF1A;HIST1H1T;HMGCR;HP;HPSE;IFNAR1;IFNGR2;IGSF6;IL10RB;IL13RA1;IL18RAP;IL1B;IL1R1;IL1RN;INHBB;INPP5A;INSC;IQGAP1;IRAK3;ITGAD;ITM2E  
1;KCNH7;KCNJ15;KCNS1;KIAA0319;KPNA1;LAMP2;LBR;LILRA6;LILRB3;LRRC4;LYN;LYVE1;MANSC1;MBOAT2;MCTP2;MEGF9;MME;MPZL3;MRV1;MYO10;NAIP;NCF4;NPTN;NUP50;NUPL1;OSM;OXER1;PCNX;PDZD3;PHB;PICALM;PLB1;PLD1;PLXDC2;PLXNC1;PPAP2B;PRRG4;PTPRE;PVRL2;RAB27A;RAPGEF2;R

97;GPSM2;GSK3B;GTSE1;H3F3B;HAS1;HCAR2;HCAR3;HEY1;HIF1A;HIVEP1;HMGCR;HP;HPSE;IFNAR1;IFNGR2;IGSF6;IL10RB;IL13RA1;IL18RAP;IL1B;IL1R1;IL1RN;INHBB;IQGAP1;IRAK3;ITGAD;ITM2B;JHDM1D;JMJD1C;KCNE1;KCNH7;KDM1B;KIAA0319;KLF6;KPNA1;KPNA4;LAMP2;LILRB3;LIMD1;LITAF;LMO4;LR  
FCAB2;ELOVL5;EMR3;ENO3;ENTPD1;ETS2;EVI5;EXT1;F5;FAM120A;FCGR1A;FCGR1B;FCGR1C;FCGR2A;FCGR3B;FFAR2;FFAR3;FGF13;FLI1;FLOT1;FOXO3;FPR1;FYB;GABARAPL1;GBE1;GCM1;GDE1;GIMAP1;GMPR2;GNAQ;GPSM2;GSK3B;H3F3B;HEY1;HIF1A;HIST1H1T;HIVEP1;HMGCR;HP;HPSE;HSPA6;IDH1;ID

C4;LYN;LYVE1;MANSC1;MBOAT2;MCTP2;MEGF9;MME;MPZL3;MRV1;NCF4;NPTN;NUP50;NUPL1;OSM;OXER1;PCNX;PHB;PLB1;PLXDC2;PLXNC1;PPAP2B;PRRG4;PTPRE;PVRL2;RAPGEF2;RNF130;RNF145;RNF149;RNF198;RTN3;SCARF1;SDCBP;SECTM1;SIT1;SLC12A6;SLC15A4;SLC22A1;SLC22A14;SLC22A4;SI

I;GBE1;GDE1;GIMAP1;GLIPR2;GLT1D1;GMPR2;GNAQ;GOLGA7B;GPR89A;GPSM2;GRIP2;GSDMC;GSK3B;GTSE1;HAL;HEY1;HIF1A;HIVEP1;HMGCR;HPSE;IDH1;IDS;IFNGR2;IL1B;IL1RN;INHBB;INSC;IQGAP1;IRAK3;ITM2B;KAZN;KCNK1;KIAA0319;KLF6;KPNA1;KPNA4;LAMP2;LBR;LIMD1;LITAF;LRRC6;LRRFIP1;LYN

ST3GAL5;TG;TGM3;TIAM2;TMLHE;TMX4;TNFRSF1A;WNT1

2;MCTP2;MEGF9;MME;MPZL3;MRV11;NCF4;NPTN;NUP50;NUPL1;OSM;OXER1;PCNX;PHB;PLB1;PLXDC2;PLXNC1;PPAP2B;PRRG4;PTPRE;PVRL2;RAPGEF2;RNF130;RNF145;RNF149;RNF19B;RTN3;SCARF1;SDCBP;SECTM1;SIT1;SLC12A6;SLC15A4;SLC22A1;SLC22A14;SLC22A4;SLC26A8;SLC2A11;SLC45A4;SLC8A

T1;F5;FAM65B;FCGR1A;FCGR1B;FFAR2;FFAR3;FGF13;FLI1;FLOT1;FOXO3;FPR1;FPR2;FRMD4B;FYB;GCM1;GIMAP1;GNAQ;GPR141;GPR17;GPR89A;GPR97;GPSM2;GRIP2;GSK3B;GTSE1;H3F3B;HAS1;HCAR2;HCAR3;HEY1;HIF1A;HIST1H1T;HMGCR;HP;HPSE;IDH1;IFNAR1;IFNGR2;IGSF6;IL10RB;IL13RA1;IL18RAF

;P1;HMGC;HP;HPSE;FNAR1;FNGR2;GSF6;IL10RB;IL13RA1;IL18RAP;IL1B;IL1R1;IL1RN;INHBB;QGAP1;IRAK3;ITGAD;ITM2B;JHDM1D;JMJD1C;KCNE1;KCNH7;KDM1B;KIAA0319;KLF6;KPNA1;KPNA4;LILRB3;LIMD1;LITAF;LMO4;LRRFIP1;LYN;MAK;MARCKS;MCTP2;MLL11;MYO10;MYO5A;NAIP;NCOA1;NCOA

;TLR5;TNFRSF1A;TNFSF14;TPX2;TRIB1;TSHZ3;UIMC1;VAMP3;WAC;WIPF1;WLS;WNT10B;ZAK;ZFP

;WNT10B;ZAK;ZFP

†RTC2;DMXL2;DNAH14;DNAJB11;DNAJC3;DOCK1;DOCK4;DPYD;DUSP13;E2F3;EBP;ECHDC3;EDEM2;ELMOD3;ELOVL5;EMR3;ENO3;ENTPD1;ETS2;EVI5;EXT1;F5;FAM120A;FAM49A;FAM65B;FCGR1A;FCGR1B;FCGR1C;FCGR2A;FCGR3B;FFAR2;FFAR3;FGF13;FLI1;FLOT1;FOXO3;FPR1;FPR2;FRMD4B;FRY;FYB;GA  
†RTC2;DMXL2;DNAH14;DNAJB11;DNAJC3;DOCK1;DOCK4;DPYD;DUSP13;E2F3;EBP;ECHDC3;EDEM2;ELMOD3;ELOVL5;EMR3;ENO3;ENTPD1;ETS2;EVI5;EXT1;F5;FAM120A;FAM49A;FAM65B;FCGR1A;FCGR1B;FCGR1C;FCGR2A;FCGR3B;FFAR2;FFAR3;FGF13;FLI1;FLOT1;FOXO3;FPR1;FPR2;FRMD4B;FRY;FYB;GA

BR;LIMD1;LITAF;LYN;MARCKS;MBOAT2;ME2;MME;MRPL9;MRV11;MXD1;MYO10;MYO5A;MZT2A;NCF4;NEDD9;NFE2L2;NLN;NMNAT2;NPEPP5;NRD1;NT5C2;OPLAH;OSBPL1A;PAK2;PANK2;PAPSS2;PDE4B;PDK3;PDRG1;PDZD3;PELI2;PFKFB4;PGS1;PHB;PICALM;PLBD1;PLD1;PLIN5;PNP;POLD3;PPAP2B;PPP1F

VWF;WAS

D1;TUBA8;TUBB1;VEGFC;VIL1;VWF;WAS









40;TUBA8;TUBB1;VEGFC;VEPH1;VIL1;VWF;WASF3;ZNF4





M2;TMEM98;TMOD1;TNS1;TRIM10;TRIM50;TSPO2;TSTA3;TTC25;TUBB2A;TUBB2B;UBA52;UBB;UBXN6;UTS2R;VTI1B;WDR45;YE

^5;SLC4A1;SLC6A19;SLC6A8;SLC6A9;SNCA;SOX6;SPDYC;SPTA1;STRADB;STX2;TAL1;TESC;TFDP1;TGM2;TMOD1;TNS1;TRIM10;TSTA3;TUBB2A;TUBB2B;UBA52;UBB;UTS2R;VIPR2;VTI1B;WDR45;WNT9A;XK;YI



NF10;RPL3L;SEC14L4;SELENBP1;SFRP2;SGIP1;SHARPIN;SIAH2;SIM2;SLC2A4;SLC4A1;SNCA;SOX6;SPDYC;SPTA1;STRADB;STX2;TAL1;TESC;TFDP1;TGM2;TMCC2;TMEM158;TMOD1;TNS1;TRIM10;TRIM50;TRIM58;TSPO2;TSTA3;TUBB2A;TUBB2B;UBA52;UBB;UBXN6;VWCE;WDR45;WNT9A;XK;Y

UBA52;UBB;UTS2R;VIPR2;VTI1B;WNT9A;



STAG3;STAP1;STRBP;SWAP70;SYNPO;TCF4;TCL1A;TNFRSF1











































CE1;SPIN1;TERF1;THBS1;TIPIN;TNKS;TRIM32;TUBA1A;TUBA4A;UBD;UBE2C;UBE2S;UHRF2;USP;

LN1;FHOD3;FOXD4L1;FTH1;FUZ;GABARAP;GALR2;GJA4;GJC1;GNG4;GNPAT;GPM6B;GPX3;GRB7;GSPT2;HAS3;HAUS2;HDAC2;HES1;HIST1H1C;HIST1H2AD;HIST1H2BK;HIST1H2BO;HIST2H2AB;HMGA2;HPN;HSP90AA1;HTRA3;IGFBP2;IHH;INPP5I;INSRR;INTU;ISL2;ITGA7;ITGB1;KCNA3;KCNB1;KCNQ5;KCTD4;\*

CCDC15;CCDC19;CCDC50;CCIN;CCNJ;CD151;CDC14B;CDC23;CDK5;CDK6;CDKN2D;CDYL;CENPC1;CENPJ;CEP128;CEP192;CEP68;CEP76;CERS1;CERS4;CERS6;CHIC2;CHRNA3;CHST1;CITED4;CLASP2;CLIC5;CLINT1;CLLU1;CLOCK;CLTB;CMAS;CNIH2;COL16A1;COL18A1;COL23A1;COL4A2;COL9A1;COX6B1;CPE;CP

LN1;FHOD3;FOXD4L1;FTH1;FUZ;GABARAP;GALR2;GJA4;GJC1;GNG4;GNPAT;GPM6B;GPX3;GRB7;GSPT2;HAS3;HAUS2;HDAC2;HES1;HIST1H1C;HIST1H2AD;HIST1H2BK;HIST1H2BO;HIST2H2AB;HMGA2;HPN;HSP90AA1;HTRA3;IGFBP2;IHH;INPP5J;INSRR;INTU;ISG20;ISL2;ITGA7;ITGB1;KCNA3;KCNB1;KCNQ5;K

192;CEP68;CEP76;CERS1;CERS4;CERS6;CHIC2;CHRNA3;CHST1;CITED4;CLASP2;CLIC5;CLINT1;CLOCK;CLTB;CMAS;CNIH2;COL16A1;COL18A1;COL23A1;COL4A2;COL9A1;COX6B1;CPE;CPT1B;CRTAP;CSE1L;CSPG5;CSPP1;CTLA4;CTNNBIP1;CTNND2;CWC27;CYP11B1;CYP1A1;CYP2A7;CYP4V2;DBT;DCAF17;DCTN

192;CEP68;CEP76;CERS1;CERS4;CERS6;CHIC2;CHRNA3;CHST1;CITED4;CLASP2;CLIC5;CLINT1;CLOCK;CLTB;CMAS;CNIH2;COL16A1;COL18A1;COL23A1;COL4A2;COL9A1;COX6B1;CPE;CPT1B;CRTAP;CSE1L;CSPG5;CSPP1;CTLA4;CTNNBIP1;CTNND2;CWC27;CYP11B1;CYP1A1;CYP2A7;CYP4V2;DBT;DCAF17;DCTN



;GTF2H3;GTF3C3;GVINP1;HAUS2;HDAC2;HELQ;HES1;HEXIM2;HIST1H1C;HIST1H2AD;HIST1H2BK;HIST1H2BO;HIST2H2AB;HLX;HMBOX1;HMGA2;HN1;HNRNPA1L2;HOXB6;HPN;HUS1;HUS1B;IER3;IL15RA;INTS10;IPO7;IPPK;ISG20;ISL2;JDP2;KIAA1161;KIFAP3;KLF12;KPTN;L3MBTL3;LIN37;LRPPRC;LTV1;MAFF;

;B;TERF1;THBS1;TNKS;TRIM37;TRIP6;TSPAN4;TSPYL1;TSPYL5;TTBK2;TUBA1A;TUBA1C;TUBA4A;UBD;UBE2C;UBE2S;WDR19;WNT;

7;CBX8;CCDC15;CCDC19;CCDC50;CCIN;CCNJ;CD151;CDC14B;CDC23;CDK5;CDK6;CDKN2D;CDYL;CENPC1;CENPJ;CEP128;CEP192;CEP68;CEP76;CERS1;CERS4;CERS6;CHIC2;CHRNA3;CHST1;CITED4;CLASP2;CLIC5;CLINT1;CLLU1;CLOCK;CLTB;CMAS;CNIH2;COL16A1;COL18A1;COL23A1;COL4A2;COL9A1;COX6B1;

IT1;CLOCK;CLTB;CMAS;CNIH2;COL16A1;COL18A1;COL23A1;COL4A2;COL9A1;COX6B1;CPE;CPT1B;CRTAP;CSE1L;CSPG5;CTLA4;CTNNBIP1;CTNND2;CWC27;CYP11B1;CYP1A1;CYP2A7;CYP4V2;DBT;DCAF17;DDAH2;DDN;DDX1;DEDD2;DGAT1;DHRS7B;DHX29;DIP2C;DNAH2;DNAH9;DNAJC2;DNAJC8;DNER;DNN

IT1;CLOCK;CLTB;CMAS;CNIH2;COL16A1;COL18A1;COL23A1;COL4A2;COL9A1;COX6B1;CPE;CPT1B;CRTAP;CSE1L;CSPG5;CTLA4;CTNNBIP1;CTNND2;CWC27;CYP11B1;CYP1A1;CYP2A7;CYP4V2;DBT;DCAF17;DDAH2;DDN;DDX1;DEDD2;DGAT1;DHRS7B;DHX29;DIP2C;DNAH2;DNAH9;DNAJC2;DNAJC8;DNER;DNN

;CARD9;CASK;CASP7;CASR;CBX8;CCIN;CCL25;CCL27;CCL28;CD151;CD300A;CD3G;CDC14B;CDC23;CDH5;CDK5;CDK6;CDKN2D;CDYL;CENPC1;CENPJ;CEP192;CEP68;CEP76;CERS1;CERS4;CERS6;CHRM4;CHRM5;CHRNA3;CHST1;CIB2;CITED4;CLASP2;CLCN1;CLDN10;CLDN11;CLIC5;CLINT1;CLOCK;CLTB;CMAS;CI

12;COL9A1;COX6B1;CPE;CPT1B;CRTAP;CRYZL1;CSPG5;CTLA4;CTNNBIP1;CYP11B1;CYP1A1;CYP2A7;CYP4V2;DARS;DBT;DCTN3;DDAH2;DDN;DDX1;DGAT1;DHRS7B;DHX29;DNAH2;DNAH9;DNAJC2;DNER;DNM1L;DOK1;DRD3;DSTN;DYNC111;DYNC2H1;EBPL;ECE2;EI24;EIF2S1;EIF4EBP1;EIF4EBP3;ELANE;ELF3;E

BRM1;PCBD2;PCGF2;PDE2A;PDE8A;PDS5A;PIAS2;PIK3R1;PIWIL2;PLK3;PPP1R8;PPP2CA;PRDM7;PRNP;PRR13;PSRC1;PTPN14;PYCARD;RALGAPA1;RARA;RBL1;RBMX;RFXANK;RGS14;RGS2;RHOG;RNF168;SBNO1;SCRT1;SERTAD1;SET;SHOX2;SIRT7;SMAD6;SMC3;SNAPC3;SPHK1;SPI1;SRA1;SRFBP1;SYNCRIP;T

13;NRZC2;NUFIP1;PAX9;PBRM1;PCBD2;PCGF2;PDE2A;PDE8A;PDS5A;PIAS2;PIK3R1;PIWIL2;PLK3;POLR2D;PPP1R8;PPP2CA;PRDM7;PRNP;PRR13;PSRC1;PTPN14;PYCARD;RALGAPA1;RARA;RBL1;RBMX;RFXANK;RGS14;RGS2;RHOG;RNF168;SBNO1;SCRT1;SERTAD1;SET;SHOX2;SIRT7;SMAD6;SMC3;SNAPC3;SP







K1;DBNL;DCLRE1B;DGKG;DNAJB5;DNAJB6;DOCK2;DOCK6;DOCK8;DVL3;DYSF;EPPD1;EGR1;EHD1;EHD3;EID3;EIF2AK1;EIF2B3;ELK1;ELMO1;EMR2;EP300;EPHB1;EXTL3;EYA3;F11R;F13A1;F2RL2;FAM129A;FAM162A;FANCF;FBXO22;FCN1;FLCN;FOXN3;FOXO4;FOXP3;FTO;FUNDCl;G6PD;GBA;GCK;GNA11;GN

4OA;RNF41;RPS6KA1;SELPGL;SEMA4A;SERPINA1;SLC11A1;SOD1;SOX4;SRC;SRF;STAT5A;STAT5B;STAT6;SYK;TGFB1;TIRAP;TLN1;TNFSF13;VAV1;VCL;V

AH1B1;PDCD6;PEX7;PLEK;PMPCB;POU2F2;POU5F1;PPID;PPP1R10;PPT1;PRAF2;PRKACA;PRKCB;PSEN1;PTTG1IP;RAB11FIP1;RAB19;RAB23;RAB35;RAB36;RAB3D;RAB40B;RAB43;RAB58;RAB5C;RAB7A;RAB8A;RAMP1;RBM22;RERE;RHBD2F;RHOA;RPAIN;RPH3A;RPL6;RPLP0;RPN1;RPS10;RPS9;RRBP1;SCAMP

I7A;RAB8A;RAC1;RGL4;RIN3;RPH3A;RPN1;SEC23B;SEC31A;SERPINA1;SH3KBP1;SLC11A1;SLC1A5;SNX19;SNX24;SPG21;SPPL3;SRGAP2;SRI;SV2B;SYK;SYT2;TBC1D2;TGFB1;TGFB1;TGOLN2;TIRAP;TLN1;TLR9;TMEM67;TPP1;TPRG1L;ULK1;VAMP2;VAMP8;VIM;WAS;WIPI1;YIPF3;YWH  
EN1;PTK2B;PTPN1;PTPN6;PTPRJ;PVR;RAC1;RCOR1;RIPK1;RNF41;RPS6KA1;SAMHD1;SELL;SH2D1A;SIN3A;SLC11A1;SOD1;SPG21;SRC;STAT5A;STAT5B;STAT6;SYK;TAP2;TFE3;TGFB1;THOC5;TIRAP;TLR9;TNFSF13;TNIP1;TRAT1;TRIM27;UBE2V1;VASP;VAV1;WAS;WDR61;X  
NG2;KCNMB4;KDELRL1;KIAA0196;KIF13A;KIF1B;KIF1C;KPNB1;LAT2;LCP1;LCP2;LEFTY2;LILRB1;LIN7B;LMTK2;LTBP2;MAP15;MAP2K1;MAPK14;MERTK;MFN2;MGRN1;MICU1;MRPL45;MX2;MYH9;MYO1F;MYO7A;NAPA;NDEL1;NFKBIA;NLR4;NLRP12;NLRP3;NMB;NOD2;NOTCH1;NOTCH2;NRBP1;NUP98;NUP  
N7B;LMTK2;LRP1;LRP10;LTBP2;MAGI2;MAGOHB;MAPK14;MAPRE1;MEST;MFN2;MLH3;MRPL45;MX2;MYH9;MYO7A;NACC2;NAPA;NCOR1;NFKB1;NFKBIA;NLR4;NLRP12;NLRP3;NMB;NOD2;NOTCH1;NOTCH2;NUP35;NUP98;NUPL2;NXT1;OPTN;OS9;OSBP;OSBPL2;PACS1;PAFAH1B1;PAK1;PDCD6;PEX7;PID

IA1;FANCF;FDX1;FLT3;FOXJ2;FOXN3;FOXO4;FOXP3;FURIN;FUS;GALNS;GATAD2B;GBA;GCK;GIT2;GLB1;GM2A;GNS;GOLIM4;GTF2F1;GTF3A;H1FO;H2AFY;HAX1;HCLS1;HDAC4;HDGF;HEXB;HIBADH;HIPK2;HMOX1;HNRNP;HNRNPF;HNRNPK;HNRNPUL1;HSD17B4;HSPA1B;HSPA5;IGF2R;ING4;INTS3;IP6K1;IQS  
IAB7A;RAB8A;RAC1;RGL4;RIN3;RPH3A;RPN1;SEC23B;SEC31A;SERPINA1;SH3KBP1;SLC11A1;SLC1A5;SNX19;SNX24;SOD1;SPG21;SPPL3;SQSTM1;SRGAP2;SRI;SV2B;SYK;SYT2;TBC1D2;TGFB1;TGOLN2;TIRAP;TLR9;TM9SF1;TMEM67;TP53INP2;TPP1;TPRG1L;ULK1;VAMP2;VAMP8;WIPI1;YIPF3;YWH

CK;HCLS1;HERPUD1;HEXB;HIP1;HIPK2;HK2;HMOX1;HRK;HSPA1B;HSPA5;IGF1R;IL6R;ING4;IRS2;ITGA5;ITGB2;ITSN1;JAK3;KCNK3;KIAA0196;KIAA1324;KIF1B;KLF4;KPNB1;LAMP1;LILRB1;MAEA;MAGEH1;MAP15;MAP3K5;MAPK14;MAX;MKNK2;MMP9;MRPS30;NACC2;NAE1;NCF2;NCSTN;NDUFS3;NEK6;NFKB  
CK;HCLS1;HERPUD1;HEXB;HIP1;HIPK2;HK2;HMOX1;HRK;HSPA1B;HSPA5;IGF1R;IL6R;ING4;IRS2;ITGA5;ITGB2;ITSN1;JAK3;KCNK3;KIAA0196;KIAA1324;KIF1B;KLF4;KPNB1;LAMP1;LILRB1;MAEA;MAGEH1;MAP15;MAP3K5;MAPK14;MAX;MKNK2;MMP9;MRPS30;NACC2;NAE1;NCF2;NCSTN;NDUFS3;NEK6;NFKB  
FOXJ2;FOXN3;FOXO4;FOXP3;FURIN;FUS;GALNS;GATAD2B;GBA;GCK;GIT2;GLB1;GM2A;GNS;GOLIM4;GTF2F1;GTF3A;H1FO;H2AFY;HAX1;HCLS1;HDAC4;HDGF;HEXB;HIBADH;HIPK2;HMOX1;HNRNP;HNRNPF;HNRNPK;HNRNPUL1;HSD17B4;HSPA1B;HSPA5;ING4;INTS3;IP6K1;IQSEC1;IRF2;ISG20L2;JARID2;KAT

6;IL23A;IL4R;IMMP2L1;IRS2;JAK3;JPH4;KCNAS;KCNK3;KCNK2;KCNMB4;KDELRL1;KIAA0196;KIF13A;KIF1B;KIF1C;KPNB1;LAT2;LCP1;LCP2;LEFTY2;LILRB1;LIN7B;LMTK2;LTBP2;MAGI2;MAP15;MAP2K1;MAPK14;MAPRE1;MERTK;MFN2;MGRN1;MICU1;MRPL45;MX2;MYH9;MYO1F;MYO7A;NACC2;NAPA;NDEL1;I  
EIF2AK1;ELK1;ELMO1;EP300;EPHB1;EPS15L1;ESR1;EVC;EYA3;FAM162A;FBN2;FBP1;FGF9;FIS1;FKBP1A;FLCN;FLT3;FOXP3;FURIN;FZD1;GAB2;GBA;GDI2;GIT2;GLI1;GMIP;GNAI2;GPR183;GRB10;GRB2;GSK3A;HAX1;HCK;HCLS1;HIPK2;HLA-B;HLA-C;HLA-DPA1;HLA-E;HMGN3;HMOX1;HRK;HSPA5;IFNAR2;JGF1R

AH1B1;PDCD6;PEX7;PID1;PLEK;PMPCB;POU2F2;POU5F1;PPID;PPP1R10;PPT1;PRAF2;PRKACA;PRKCB;PSEN1;PTTG1IP;RAB11FIP1;RAB19;RAB23;RAB35;RAB36;RAB3D;RAB40B;RAB43;RAB58;RAB5C;RAB7A;RAB8A;RAMP1;RBM22;RERE;RHBD2F;RHOA;RPAIN;RPH3A;RPL6;RPLP0;RPN1;RPS10;RPS9;RRBP1;SC  
XP3;FURIN;FUS;GALNS;GATAD2B;GBA;GCK;GIT2;GLB1;GM2A;GNS;GOLIM4;GTF2F1;GTF3A;H1FO;H2AFY;HAX1;HCLS1;HDAC4;HDGF;HEXB;HIBADH;HIPK2;HMOX1;HNRNP;HNRNPF;HNRNPK;HNRNPUL1;HSD17B4;HSPA1B;HSPA5;ING4;INTS3;IP6K1;IQSEC1;IRF2;ISG20L2;JARID2;KATS;KAT6A;KAT7;KDM2A;

F4;ELK1;ELL;ELL3;ENO1;EP300;ERC1;ERF;ESR1;ESRP2;EYA3;FAM120B;FAM129A;FAM58A;FGF9;FLCN;FOSL2;FOXJ2;FOXN3;FOXO4;FOXP3;FTO;FZD1;GAS7;GIGYF2;GLI1;GLMN;GLO1;GNAS;GNRH1;GTF2F1;GTF2H5;GTF3A;H2AFY;HAX1;HCK;HCLS1;HDAC4;HDGF;HENMT1;HESX1;HEXB;HIP1;HIPK2;HIVEP3;H

ECN1;BEX2;BHLHE40;BLOC1S3;BNIP3;BRAP;BRCA1;BRD3;BRD4;BRD8;BRE;BSG;BTG2;BTG3;BTX;BTN3A1;BUB3;C11orf31;C1QTNF3;C3;CSAR1;C6orf89;CABLES2;CACNG8;CALCOCO1;CAMK1D;CAMK2G;CAMKK2;CAMTA1;CANT1;CAP1;CAPN1;CAPNS1;CAPZB;CARM1;CASC3;CASP6;CASP9;CASZ1;CBFA2T3;CE  
IN3D;BCL2L13;BCL6;BCL9;BCO2;BCOR;BCORL1;BECN1;BEX2;BHLHE40;BLOC1S3;BNIP3;BRAP;BRCA1;BRD3;BRD4;BRD8;BRE;BSCL2;BSG;BTG2;BTG3;BTX;BTN3A1;BUB3;C11orf31;C1QTNF3;C1RL;C3;C4BPB;CSAR1;C6orf89;CABLES2;CACNG8;CALCOCO1;CAMK1D;CAMK2G;CAMKK2;CAMTA1;CANT1;CAP1;CAF  
2;NAPA;NFKBIA;NLR4;NLRP12;NLRP3;NOD2;NOTCH1;NOTCH2;NUP35;NUP98;NUPL2;NXT1;OPTN;OS9;PACS1;PAFAH1B1;PAK1;PDCD6;PEX7;PID1;PLEK;PMPCB;POU2F2;POU5F1;PPID;PPP1R10;PPT1;PRAF2;PRKACA;PRKCB;PSEN1;PTTG1IP;RAB11FIP1;RAB19;RAB23;RAB35;RAB36;RAB3D;RAB40B;RAB43;

6;NFKB1;NFYC;NMNAT1;NOTCH1;NOTCH2;NR2C1;NRBP1;NUP98;PAF1;PBX2;PCBP1;PCBP2;PHF12;PHF21A;PKNOX1;POLE4;POLR2A;POLR3F;POLR3GL;POU5F1;PPID;PRIM1;PRKCD;PRKDC;PSMB2;PSMD3;PSME3;PSMF1;PTRF;RAD1;RAD23B;RBM8A;RBP1;RCC1;RCOR1;RERE;RFC4;RNF34;RPA3;RPAIN;RPRD  
101B;FAM160A2;FAM162A;FHDC1;FIG4;FIS1;FLCN;FOXP3;FSCN1;GAS7;GBA;GOLGA5;GOLGB1;GRB2;GSN;H1FO;H2AFY;HAX1;HCK;HCLS1;HDAC4;HEXB;HIP1;HIPK2;HIST3H2A;HK2;HMGN3;HRK;IKZF1;IMMP2L;ING4;INSR;IQSEC1;JARID2;KATS;KAT6A;KAT7;KATNA1;KDM2A;KDM3B;KDM4B;KDM5B;KDM6B;

LS1;HDAC4;HDGF;HIPK2;HMOX1;HNRNP;HNRNPF;HNRNPK;HNRNPUL1;HSPA1B;HSPA5;IGF2R;ING4;INTS3;IP6K1;IQSEC1;IRF2;ISG20L2;JARID2;KATS;KAT6A;KAT7;KDM2A;KDM5B;KLF4;KPNB1;LRRCS9;LZTS1;MAEA;MAFB;MAFG;MAML1;MAML3;MAP2K3;MAPK14;MAU2;MAX;MED12;MED25;MGST3;MID

;ITGA5;ITGB2;ITSN1;JAK3;KIAA1324;KIF1B;KLF4;KPNB1;LAMP1;LILRB1;MAEA;MAGEH1;MAP15;MAP3K5;MAPK14;MAX;MKNK2;MMP9;MRPS30;NACC2;NAE1;NCF2;NCSTN;NDUFS3;NEK6;NFKB1;NFKBIA;NLR4;NLRP12;NLRP3;NME1;NME2;NOD2;NOTCH1;NOTCH2;NUAK2;NUDT2;P2RX1;PAK1;PDCD5;PD  
A;CUX1;CXCR2;DAB2;DAG1;DAPK1;DBNL;DENND1A;DENND3;DNAJC1;DNAJC19;DNAJCS;DNM2;DOCK2;DSCR3;DYNLL1;DYNLL2;DYSF;EHD1;EHD3;EIF2D;ELMO1;ELMO2;ENSA;EPS15L1;ERC1;ERGC1;F13A1;FABP6;FAM160A2;FAM21A;FAM21C;FBXO22;FCN1;FGF9;FIS1;FKBP15;FKBP1A;FLVCR2;FOXP3;FUI  
1;CHRN2B;CITED2;CLPX;CNN2;CNOT1;CNOT4;CPNY2;CPT1A;CPT2;CREBBP;CSF1;CSF1R;CSNK1D;CSNK2A1;CTDP1;CTDSP2;CTIF;CTNNB1;CTNND1;CTSA;CTSB;CUX1;CUX2;DAB2;DAP;DAPK1;DAPK2;DBNL;DEDD;DISC1;DNAJB6;DNM2;DNMT3B;DPF2;DSCC1;DUSP12;DVL3;DYNLL1;ECE1;EGR1;EID2B;EID3;EIF2  
EOD;DISC1;DNM2;DNMT3B;DPF2;DSCC1;DVL3;DYNLL1;ECE1;EGR1;EID2B;EID3;EIF2AK1;EIF2B3;EIF4A2;EIF4EBP2;EIF4H;ELF4;ELK1;ELL;ELL3;ENO1;EP300;ERC1;ERF;ESR1;ESRP2;EXTL3;EYA3;FAM120B;FAM129A;FAM58A;FBP1;FBXO22;FGF9;FKBP1A;FLCN;FLT3;FOSL2;FOXJ2;FOXN3;FOXO4;FOXP3;FTO;FURI

;ITGA5;ITGB2;ITSN1;JAK3;KIAA1324;KIF1B;KLF4;KPNB1;LILRB1;MAEA;MAGEH1;MAP15;MAP3K5;MAPK14;MAX;MKNK2;MMP9;MRPS30;NACC2;NAE1;NCF2;NCSTN;NDUFS3;NEK6;NFKB1;NFKBIA;NLR4;NLRP12;NLRP3;NME1;NME2;NOD2;NOTCH1;NOTCH2;NUAK2;NUDT2;P2RX1;PAK1;PDCD5;PDCD6;PHL

;SH3KBP1;SLC11A1;SLC1A5;SNX19;SNX24;SPG21;SPPL3;SRGAP2;SRI;SV2B;SYK;SYT2;TBC1D2;TGFB1;TGOLN2;TIRAP;TLR9;TMEM67;TPP1;TPRG1L;ULK1;VAMP2;VAMP8;WIPI1;YIPF3;YWH

;1D;CSNK2A1;CTDP1;CTDSP2;CTIF;CTNNB1;CTNND1;CUX1;CUX2;DAB2;DAP;DAPK1;DAPK2;DBNL;DEDD;DISC1;DNAJB6;DNM2;DNMT3B;DPF2;DSCC1;DUSP12;DVL3;DYNLL1;ECE1;EGR1;EID2B;EID3;EIF2AK1;EIF2B3;EIF4A2;EIF4EBP2;EIF4H;ELF4;ELK1;ELL;ELL3;ENO1;EP300;ERC1;ERF;ESR1;ESRP2;EXTL3;EYA3;

;ATP6V1B2;ATPIF1;ATXN2;B4GALT1;BASP1;BAZ2A;BBS4;BCIP;BCDIN3D;BCL2L13;BCL6;BCL9;BCO2;BCOR;BCORL1;BECN1;BEX2;BHLHE40;BICD2;BLOC1S3;BNIP3;BRAP;BRCA1;BRD3;BRD4;BRD8;BRE;BRPF3;BSCL2;BSG;BTG2;BTG3;BTX;BTN3A1;BUB3;C11orf31;C1QTNF3;C1RL;C3;C4BPB;CSAR1;C6orf89;CAE  
IM4;COG8;COLEC12;COPA;COPB2;COPZ2;CORO1C;COX17;COX18;CPNE7;CPT1A;CPT2;CRTAM;CSF1;CSF1R;CSF3R;CTNNB1;CTSA;CUX1;CXCR2;DAB2;DAG1;DAPK1;DBNL;DENND1A;DENND3;DISC1;DNAF2;DNAH17;DNAJC14;DNAJC19;DNAJCS;DNM2;DNMT3B;DOCK2;DSCR3;DYNLL1;DYNLL2;DYSF;EHD1;EI  
P2R1;CYP4F3;DAG1;DGKG;DHTKD1;DHX34;DNMT3B;DPF2;DUSP12;DYRK4;ECE1;EFHA2;EFHC1;EGR1;EHD1;EHD3;ELAC1;EMR2;ENDOU;ENO1;ENOPH1;EP300;EPS15L1;ESR1;EXTL3;EYA3;F13A1;FAHD1;FAHD2A;FBN2;FBP1;FBXO4;FCN1;FDX1;FKBP9;FNTB;FOXP3;FTO;FUCA2;FURIN;FUS;GALNS;GALNT2;G  
IMOX1;IFNAR2;IGF1R;IL23A;IL6R;ING4;INSR;IQSEC1;IRAK2;IRS2;ITSN1;JAK1;JAK3;KATS;KLF4;KSR1;LAT2;LIMK1;LRRK1;MAGI2;MAP2K1;MAP2K3;MAP3K3;MAP3K5;MAP4K4;MAPK13;MAPK14;MAPKAPK5;MARK2;MERTK;MFN2;MGRN1;MKNK1;MKNK2;MYD88;NACC2;NBR1;NCOR1;NDEL1;NDRG1;NDST1;N



'AMK1D;CAMK2G;CAMKK2;CANT1;CAP1;CARM1;CASP9;CBL;CBY1;CC2D2A;CCL3;CCNK;CD101;CD14;CD209;CD3D;CD44;CD53;CD68;CD86;CD97;CDC42;CDC42EP4;CDC42SE1;CDH1;CELA1;CERKL;CFL1;CFLAR;CHCHD6;CHD8;CHEK1;CHKA;CHRN1;CHRN2;CHST11;CITED2;CLTA;CLTC;CLTCL1;CNN2;COL15A1

3;ELMO1;ELMO2;ERC1;ERGIC1;F13A1;FABP6;FAM160A2;FAM21A;FAM21C;FCN1;FGF9;FIS1;FKBP1A;FLVCR2;FOXP3;FURIN;FZD1;GAB2;GABRR2;GCC1;GCK;GLMN;GLUL;GNAI2;GNAS;GOLGA5;GOSR1;GRB10;GRB2;GSK3A;HCK;HCLS1;HDLBP;HFE;HGSNAT;HIP1;HK1;HK2;HMGN3;HMOX1;HNRNPK;HSPA5;IF

2F2;PRAM1;PRG2;PRKCB;PRKCD;PRKD2;PRKRA;PSEN1;PTAFR;PTK2B;PTPN1;PTPN6;PTPRJ;PVR;PVL1;RF1;RIPK1;RPS6KA1;SAMHD1;SELL;SEMA4A;SEMA4D;SH2D1A;SIN3A;SLC11A1;SP2;SPG21;STAT5A;STAT5B;STAT6;SYK;TAP2;TAPBP;TFE3;TGFB1;TIRAP;TLR9;TNFRSF1B;TNFSF13;TNIP1;TRAT1;TRIM25;TI

NPK;HSPA5;IGF1R;IKZF1;IL23A;IL6R;INSR;IRAK2;IRS2;ITGA5;JAK3;JARID2;KAT5;KAT6A;KLF13;KLF4;KLF7;KLR4-KLRK1;LILRB1;LPIN2;MAFB;MAGI2;MAML1;MAML3;MAP2K1;MAP2K3;MAP3K3;MAPK14;MAPKAPK5;MAPRE3;MED12;MED25;MLL2;MTF1;MYB;NCOA6;NCOR1;NDNL2;NFIC;NFKB1;NF

YC;PSTK;PTK2B;RAF1;RIPK1;RPS6KA1;SEPHS1;SIK3;SQSTM1;SRC;STK24;STK32B;STK35;STK4;STK40;SYK;THG1L;TJP2;TK2;TP53RK;TRIM27;UAP1;ULK1;VRK3;WINK1;XRCC6B1

'E4A;NUAK2;OS9;PAFAH1B1;PAK1;PARP4;PDCDC6;POLR2A;PRKCD;PRKDC;PRMT6;PSEN1;PSMB2;PSMD3;PSME3;PSMF1;PTK2B;PTPN1;PTTG1;PXN;RAB23;RAD1;RAD23B;RAD54B;RBM22;RCS1;RFC4;RHOA;RIPK1;ROMO1;RPA3;RPAIN;RPS6KA1;SEC31A;SETMAR;SH2D3C;SIN3A;SLC6A12;SMUG1;SOD1;SOX

EP3;HMGN3;HMOX1;HNRNPD;HNRNPK;HNRNPUL1;IFNAR2;IKZF1;IL23A;ING4;INSR;IRAK2;IRF2;JAK3;JARID2;KAT5;KAT6A;KAT7;KDM2A;KDM3B;KDM4B;KDM5B;KDM6B;KHDRBS2;KLF13;KLF4;KLF7;KLF9;LILRB1;LOXL3;LPIN2;LZTS1;MAFB;MAML1;MAML3;MAP2K1;MAP2K3;MAPK13;MAPK14;MAPRE3;MEC

3;PSMF1;PTTG1;RALBP1;RALGAPA2;RAP1GAP2;RAPGEFL1;RCC1;RGL3;RGL4;RGS10;RGS16;RGS3;RIN2;RIN3;RPS6KA1;SERPINA1;SERPINB8;SH2D3C;SIPA1L1;SIPA1L2;SKI;SMAP2;SPINK2;SPINT1;SPRED1;SPRY2;SRGAP2;STARD8;STK4;TBC1D1;TBC1D14;TBC1D19;TBC1D2;TBC1D20;TBC1D2B;TBC1D5;TBC1D8

'1;HIPK2;HIVEP3;HMGN3;HMOX1;HNRNPD;HNRNPK;HNRNPUL1;IFNAR2;IKZF1;IL23A;ING4;INSR;IRAK2;IRF2;JAK3;JARID2;KAT5;KAT6A;KAT7;KDM2A;KDM3B;KDM4B;KDM5B;KDM6B;KHDRBS2;KLF13;KLF4;KLF7;KLF9;LILRB1;LOXL3;LPIN2;LZTS1;MAFB;MAML1;MAML3;MAP2K1;MAP2K3;MAPK13;MAPK14;P

NOX1;PLAC8;POLR2A;POMC;POU2F2;POU5F1;PRKCD;PRKD2;PRKDC;PTX3;RAC1;RAF1;RAMP1;RBM20;RBM22;RBPJ;RIPK1;RNF14;RPS6KA1;RTF1;RXRA;SETMAR;SIN3A;SKI;SLC11A1;SMAD9;SMARCA2;SOX4;SPEN;SQSTM1;SRF;SSBP3;STAT3;STAT5A;STAT5B;STAT6;SUPT3H;TAF11;TAF15;TAF4;TASP1;TBL1X

LL1;ECE1;EGR1;EID2B;EID3;EIF2AK1;EIF2B3;EIF4A2;EIF4EBP2;EIF4H;ELAC1;ELF4;ELK1;ELL;ELL3;EMG1;ENO1;EP300;ERC1;ERF;ESR1;ESRP2;ETV6;EXOSC1;EXOSC3;EXOSC8;EYA3;FAM120B;FAM129A;FAM58A;FGF9;FKBP1A;FCN;FOSL2;FOXJ2;FOXN3;FOXO4;FOXP3;FTO;FURIN;FUS;FZD1;GAS7;GATAD2B;GIG

B;FOXP3;FTO;FURIN;FZD1;G6PD;GALNT11;GALNT2;GBA;GCNT7;GLMN;GNA11;GNA15;GNAI2;GNAS;GSK3A;HAX1;HCK;HCLS1;HDAC4;HDGF;HENMT1;HERPUD1;HIPK2;HSPA5;IGF1R;IL23A;IL6R;ING4;INSR;IRAK2;ITGA5;ITGB2;JAK1;JAK3;JARID2;KAT5;KAT6A;KAT7;KDM2A;KDM5B;KDM6B;KIAA0317;KLHL21

TN4;SGPL1;SH3KBP1;SIPA1L1;SKI;SMAD9;SMURF1;SOCS2;SPRY2;SQSTM1;SRC;STAT3;STAT5A;STAT5B;STRAP;SULF2;SYK;TGFB1;TLR9;TRAT1;TXNIP;ULK1;VAV1;XIAP;YWHAB;ZFP1

1;FLCN;FOSL2;FOXJ2;FOXN3;FOXO4;FOXP3;FZD1;GAS7;GCK;GIGYF2;GLI1;GLMN;GLO1;GNAI2;GNAL;GNAS;GRB10;GSK3A;GTF2F1;GTF2H5;GTF3A;HAX1;HCK;HCLS1;HDAC4;HDGF;HESX1;HEXB;HIP1;HIPK2;HIVEP3;HMGN3;HMOX1;HNRNPD;HNRNPK;HNRNPUL1;IFNAR2;IGF1R;IKZF1;IL23A;IL6R;ING4;INSR;IF

SLC11A1;SMURF1;SNX1;SOX4;SPC1;SRP54;SRPR;SSR2;STAT3;STAU1;STX18;TACC3;TAP2;TGFB1;TIMM8A;TIMM9;TINF2;TLN1;TLR9;TNPO3;TOMM22;TOMM7;TRAK1;TXNIP;UGT8;USP4;VCL;XPO6;XPO7;YWHAB;YWHAG;YWHAH;ZDHC18;ZDHH

RP12;NLRP3;NLRP6;NLRX1;NOD2;NOTCH1;NOTCH2;NUB1;OSMR;P2RX1;PACS1;PARP4;PCBP2;PIK3CD;PLAC8;PNMA1;POLR3F;PRG2;PRKCD;PTAFR;PTPN1;PTPN6;PTX3;PVR;RAB23;RAC1;RIPK1;ROMO1;RPS6KA1;SAAL1;SAMHD1;SERPINA1;SH2D1A;SIN3A;SLC11A1;SP140;STAT3;STAT5A;STAT5B;SYK;TAPBP;

A;POMC;POU2F2;POU5F1;PRKCD;PRKDC;RAC1;RAF1;RAMP1;RBM20;RBM22;RBPJ;RIPK1;RNF14;RPS6KA1;RTF1;RXRA;SETMAR;SIN3A;SKI;SLC11A1;SMAD9;SMARCA2;SOX4;SPEN;SQSTM1;SRF;SSBP3;STAT3;STAT5A;STAT5B;STAT6;SUPT3H;TAF11;TAF15;TAF4;TASP1;TBL1X;TFB2M;TFE3;TGFB1;THRAP3;TIM

'P3;HMGN3;HMOX1;HNRNPD;HNRNPK;HSPA5;IGF1R;IKZF1;IL23A;IL6R;INSR;IRAK2;IRS2;ITGA5;JAK3;JARID2;KAT5;KAT6A;KLF13;KLF4;KLF7;KLR4-KLRK1;LILRB1;LPIN2;MAFB;MAGI2;MAML1;MAML3;MAP2K1;MAP2K3;MAP3K3;MAPK14;MAPKAPK5;MAPRE3;MED12;MED25;MLL2;MTF1;MYB;NCC

.TRAPPC2;TXNIP;WIP1;XPO6;XPO7;ZC3

'42;CDH1;CDKL3;CELA1;CHD8;CHEK1;CHIL3L2;CHKA;CHRN1;CHRN2;CHST15;CLCN5;CLPX;CNOT4;COL5A2;COLEC12;COX11;COX17;COX5A;CPM;CPPED1;CREBBP;CRISPLD2;CRY2;CSAD;CSF1R;CSNK1D;CSNK2A1;CTDSP2;CYB5A;CYB5D1;CYB5R3;CYP27A1;CYP2R1;CYP4F3;DAB2;DAG1;DAPK1;DAPK2;DGKG;E

1;TIRAP;TLR9;TNFRSF1B;TNIP1;UBE2V1;ULK1;XI

;FOSL2;FOXJ2;FOXN3;FOXO4;FOXP3;FZD1;GAS7;GCK;GIGYF2;GLI1;GLMN;GLO1;GNAI2;GNAL;GNAS;GRB10;GSK3A;GTF2F1;GTF2H5;GTF3A;HAX1;HCK;HCLS1;HDAC4;HDGF;HESX1;HEXB;HIP1;HIPK2;HIVEP3;HMGN3;HMOX1;HNRNPD;HNRNPK;HNRNPUL1;IFNAR2;IGF1R;IKZF1;IL23A;ING4;INSR;IRAK2;IRF2;IR

;GBA;GCNT7;GLMN;GNA11;GNA15;GNAI2;GSK3A;HAX1;HCK;HCLS1;HDAC4;HDGF;HERPUD1;HIPK2;HSPA5;IGF1R;IL23A;IL6R;ING4;INSR;IRAK2;ITGA5;ITGB2;JAK1;JAK3;JARID2;KAT5;KAT6A;KAT7;KDM2A;KDM5B;KDM6B;KIAA0317;KLHL21;KSR1;LIMK1;LIPT1;LMTK2;MAML1;MAN2A2;MANBA;MAP2K1;MAP

'GBA;GCNT7;GLMN;GNA11;GNA15;GNAI2;GSK3A;HAX1;HCK;HCLS1;HDAC4;HDGF;HERPUD1;HIPK2;HSPA5;IGF1R;IL23A;IL6R;ING4;INSR;IRAK2;ITGA5;ITGB2;JAK1;JAK3;JARID2;KAT5;KAT6A;KAT7;KDM2A;KDM5B;KDM6B;KIAA0317;KLHL21;KSR1;LIMK1;LIPT1;LMTK2;MAML1;MAN2A2;MANBA;MAP2K1;MAP



;MAP2K3;MAP3K3;MAP3K5;MAP4K4;MAPK13;MAPK14;MAPKAPK5;MARK2;MARK3;MAST3;MBOAT7;MERTK;METTL10;METTL23;METTL5;METTL6;MGST3;MKNK1;MKNK2;MLL2;MPP1;N6AMT1;N6AMT2;NADK;NAGK;NDST1;NDST2;NEK3;NEK6;NME1;NME2;NMNAT1;NRBP1;NSD1;NTPCR;NUAK2;PAK1;P

ALTS;BASP1;BAZZA;BBS4;BCCIP;BCDIN3D;BCKDHA;BCL2L13;BCL6;BCL9;BCO2;BCOR;BCORL1;BECN1;BHLHE40;BNIP3;BPNT1;BRCA1;BRD3;BRD4;BRD8;BRE;BRPF3;BSCL2;BSG;BTG2;BTK;BUB3;BZW2;C1QTNF3;C1RL;C3;C4BPB;CSAR1;CA13;CA14;CA3;CA6;CALCOCO1;CAMK1D;CAMK2G;CAMKK2;CAMTA1;CA1;SMURF1;SNX1;SOX4;SPCS1;SRP54;SRPR;SSR2;STAT3;STX18;TACC3;TAP2;TGFBI;TIMM8A;TIMM9;TINF2;TLN1;TLR9;TNPO3;TOMM22;TOMM7;TRAK1;TXNIP;UGT8;USP4;VCL;XPO6;XPO7;YWHAB;YWHAG;YWHAH;ZDHH18;ZDHH

IDST1;NDST2;NOTCH1;NOTCH2;NSFL1C;NUCB1;OPTN;OSBP;PACS1;PAK1;PLA2G12A;PLIN3;PPT1;PRKD2;PSAP;PSEN1;QSOX1;RAB36;RAB43;RAB7A;RAB8A;RAC1;RNF122;RNF24;RRAGB;SCAMP2;SEC14L1;SEC16A;SEC23B;SETDB1;SLC1A5;SLC35A2;SLC9A8;SNX1;SPG21;SPPL3;ST3GAL2;STX18;SULF2;TAPBP;T

3;ECE1;EGR1;ELF4;ELK1;ELL;ELL3;EP300;EPHB1;EPHB2;ESR1;EVC;EXTL3;EYA3;FAM129A;FAM162A;FBN2;FBXO22;FGF9;FIG4;FIS1;FKBP1A;FLCN;FLT3;FOSL2;FOXJ2;FOXO4;FOXP3;FURIN;FZD1;GAB2;GAPDHS;GBA;GCK;GLI1;GLMN;GLUL;GNAI2;GNAL;GNAS;GPR183;GRB10;GRB2;GRN;GSK3A;GTF2F1;GTPBP;LC9A1;SNIP1;SOCS2;SOD1;SPRED1;SPRY2;SQSTM1;SRC;STAT3;STAT5A;STAT5B;STK4;SYK;TFG;TGFBI;TIMP2;TIRAP;TLR9;TNIP1;UBE2V1;WNK1;YWH

1;RNF14;RPS6KA1;RTF1;RXRA;SIN3A;SKI;SLC11A1;SMAD9;SMARCA2;SOX4;SPEN;SQSTM1;SRF;SSBP3;STAT3;STAT5A;STAT5B;STAT6;SUPT3H;TAF11;TAF15;TAF4;TASP1;TBL1X;TFB2M;TFE3;TGFBI;THRAP3;TLR9;TNIP1;TP53INP2;TRERF1;TTCS;UBE2V1;USP22;VDR;WDR61;YEATS4;YWHAH;ZMIZ1;ZNF287;ZN

DD;DENND3;DISC1;DNAJB12;DNAJB5;DNAJB6;DNAJC14;DNAJC18;DNAJC19;DNAJC5;DNAJC5B;DNMT3B;DPAGT1;DPH5;DSCC1;DUSP12;DUSP18;DVL3;DYRK4;ECE1;EGR1;EIF2AK1;EIF2B3;EIF4A2;EIF4EBP2;EIF4H;ENDOU;EP300;EPHB1;EPHB2;ERC1;EXTL3;EYA3;F13A1;FAM129A;FAM58A;FBXO22;FBXO25;FAM2;DNMBP;DNMT3B;DOCK2;DPF2;DSCC1;DYNLL1;DYNLL2;EID3;ELL3;ELMO1;ELMO2;EMG1;ENO1;EPB41;EPB41L3;ERMN;ESRP2;EVC;EXOSC1;EXOSC3;EXOSC8;FAM101B;FAM110C;FAM96B;FBXO40;FKBP15;FNTB;FOXJ2;FSCN1;G6PD;GAS7;GM2A;GNAI2;GSN;H1FO;H2AFY;HAX1;HCK;HDAC4;HENMT1;HIIARID2;KAT5;KAT6A;KLF13;KLF4;KLF7;LILRB1;LPIN2;MAFB;MAGI2;MAML1;MAML3;MAP2K1;MAP2K3;MAP3K3;MAP3K5;MAPK14;MAPKAPK5;MAPRE3;MED12;MED25;MLL2;MTF1;MYB;NCOA6;NCOR1;NDNL2;NFIC;NFKB1;NFKBIA;NFYC;NOD2;NOTCH1;NSD1;NUB1;PAF1;PAK1;PBX2;PHF2;PHF8;PIAS3;PID

CBFA2T3;CBL;CBX1;CBX6;CBY1;CCL3;CCNB1IP1;CCNK;CCRN4L;CD3D;CD44;CD86;CDC42;CDC5L;CDH1;CDK13;CELA1;CELF3;CENPH;CFL1;CFLAR;CHD8;CHEK1;CHI3L2;CHST11;CHST15;CHST7;CITED2;CLPX;CLTC;CNN2;CNOT1;CNOT4;CNPY2;COP57A;COPS8;CPM;CPOX;CPSF7;CPVL;CREBBP;CRNKL1;CSF1;CSF1ERKL;CFL1;CFLAR;CHD8;CHKA;CHRN1;CHRN2;CHST11;CITED2;CLTA;CLTC;CLTCL1;COL15A1;COLEC12;CORO1C;CREBBP;CRKL;CSF1;CSF1R;CSF2RB;CSF3R;CSNK1D;CSNK2A1;CTDSP2;CTNNA1;CTNNAL1;CTNNB1;CTNND1;CXCR2;CXCR7;DAB2;DAG1;DAP;DAP3;DAPK1;DAPK2;DBNL;DEDD;DGKG;DISC1;DNM

NOTCH2;NUAK2;NUDT2;P2RX1;PDCD5;PDCD6;PIM1;PIM2;PINK1;PLAC8;PLAGL2;PPID;PPM1F;PPT1;PRKCD;PRKDC;PRKRA;PSEN1;PSMB2;PSMD3;PSME3;PSMF1;PTK2B;RAF1;RHOA;RIPK1;RNF41;RPS6KA1;RTN4;SCRT2;SEMA4D;SIN3A;SKI;SOCS2;SOD1;SOX4;SPRY2;SRC;SSBP3;STAT5A;STAT5B;STEAP3;STK2A;GTPBP1;H1FO;HAAO;HDAC4;HERPUD1;HEXB;HGD;HGSNAT;HIBADH;HK1;HK2;HMOX1;HNRNPD;HSD17B14;HSD17B4;HSD17B6;HSPA1B;HSPA5;INSR;IRS2;KIAA0317;KIAA1324;KPNB1;LAMP1;LIPA;LSM5;LSM7;LTA4H;LYG1;LYSMD1;LZTS1;MANBA;MAP2K1;MGAM;MLH3;MX2;MYH9;N4BP1;NAGA;NAGK;I

UMF1;TFG;TGFBI;THG1L;TIMM9;TIRAP;TKT;TNNC1;TPCN2;TPD52L2;TPRG1L;TRIM8;VIM;WAS;XPA;ZNF12;DAG1;DAP3;DHX8;DISC1;DNAH17;DNM2;DSCR3;DYNLL1;DYNLL2;EID3;EIF2B3;EIF4A2;EIF4H;ELL;ELL3;ENO1;EP300;EPB41;ERC1;EXOSC1;EXOSC3;EXOSC8;EYA3;FAM110C;FAM160A2;FAM21A;FAM21C;FAM96B;FANCF;FBXO25;FIS1;FKBP15;FLOT2;FNTB;FOXJ2;FOXN3;FOXO4;FOXP3;GABRR2;GAS7;GLMN

F2B3;EIF4A2;EIF4H;ELL;ELL3;ENO1;EP300;EPB41;ERC1;EXOSC1;EXOSC3;EXOSC8;EYA3;FAM110C;FAM160A2;FAM21A;FAM21C;FAM96B;FANCF;FBXO25;FIS1;FKBP15;FLOT2;FNTB;FOXJ2;FOXN3;FOXO4;FOXP3;GABRR2;GAS7;GLMN;GLUL;GNA11;GNA12;GNA15;GNAI2;GNAL;GNAS;GNAT2;GNB1;GNB5;GOS

MM22;TOMM7;TTC19;TXNIP;UQCR10;UQCR11;USM

O7A;NDEL1;NEK3;NGDN;NMB;NME2;NRBP1;P2RX1;PAFAH1B1;PAK1;PIAS3;PLEK;PPT1;PREX1;PSEN1;PTK2B;PTPRJ;PXN;RAB35;RAB8A;RAC1;RAF1;RGS10;RHOA;RTN4;SH3KBP1;SH3PXD2B;SH3YL1;SIPA1L1;SLC38A7;SMURF1;SNAP29;SOD1;SPRY2;SRGAP2;SSH1;SVIL;TCTN1;TGFB1;TIMP2;TIRAP;TLN1;TMEN  
MEM14C;TMEM18;TMEM38A;TMEM43;TOMM22;TOMM7;TRIM27;TTC19;TXNIP;UQCR10;UQCR11;USMG5;XPO6;XPO7;ZC3H

32;YEATS4;YWHAB;YY1;ZFHX3;ZM

TMEM43;TOMM22;TOMM7;TRIM27;TTC19;TXNIP;UQCR10;UQCR11;USMG5;XPO6;XPO7;ZC3H

);RNF185;RNF213;RNF24;RNF34;RNF39;RNF41;RNPEP;RP9;RPH3A;RUFY1;RXRA;SCRT2;SEC23B;SETDB1;SETMAR;SH3RF3;SIRT4;SKI;SMAP2;SOD1;SP140;SP2;SQSTM1;SRSF7;TADA2B;TAF15;TCF20;TIMM9;TOE1;TOP3A;TRAIP;TRERF1;TRIM25;TRIM27;TRIM67;TRIM8;USP22;VDR;XIAP;XRN2;YY1;ZBTB37;ZBT

PHF2;PHF21A;PHF23;PHF8;PIAS3;PIM1;PLAGL2;PLOD1;PMPCB;PPP1R10;PRKCB;PTPN1;PXN;RBM20;RBM22;RERE;RFFL;RNF114;RNF122;RNF14;RNF167;RNF170;RNF185;RNF213;RNF24;RNF34;RNF39;RNF41;RNPEP;RP9;RPH3A;RUFY1;RXRA;SCRT2;SEC23B;SETDB1;SETMAR;SH3RF3;SIRT4;SKI;SMAP2;SOD:



VRID1B;ARIH2;ARNTL2;ASB1;ASB16;ASCC1;ASMT;ASPDH;ASXL1;ATF6B;ATG10;ATG3;ATIC;ATM;ATN1;ATP1A1;ATP1A3;ATP2A2;ATP2A3;ATP5A1;ATP5B;ATP5J;ATP5J2;ATP6V1H;ATP8B1;ATP8B2;ATXN1L;AVPR2;AXIN1;AXIN2;B3GALT4;BACE1;BACH2;BAD;BAG3;BAHD1;BATF;BATF3;BAZ18;BBS2;BCL10;BCL19;CID;C22orf28;CAD;CALM3;CALR;CAMTA2;CANO2;CAPN3;CARD11;CARNS1;CBFA2T2;CBX2;CBX5;CBX7;CCAR1;CCNT1;CCR7;CD3EAP;CD40LG;CDAN1;CDH13;CDK5RAP2;CDKAL1;CDKN2A;CDKN2B;CDON;CECR1;CELF1;CELSR2;CENPN;CENPO;CEP164;CERK;CHCHD3;CHD1L;CHD2;CHD3;CHD4;CHD6;CHEK2;JIS3L;DKC1;DNAJ1;DNAJ2;DNMT1;DNMT3A;DROSHA;EARS2;EDC3;EEF2;EEF2K;EFTUD1;EH04;EIF1AD;EIF2AK4;EIF2B1;EIF2F3;EIF3A;EIF3B;EIF4A3;EIF4F;EIF4G1;EIF4G2;EIF5A;EIF5B;ELAVL1;ELP3;EME2;ENOX2;EP400;EPRS;ERCC3;ERCC5;ETS1;EXD2;EXOG;EXOSC10;FAM103A1;FAN1;FANCI;FARSB;FBXL19;FBXO18;5;ARHGFE5;ARHGFE6;ARHGFE7;ARID1B;ARIH2;ARNTL2;ASB1;ASB16;ASCC1;ASMT;ASPDH;ASXL1;ATF6B;ATG10;ATG13;ATG14;ATG3;ATG9B;ATIC;ATM;ATN1;ATP1A1;ATP1A3;ATP2A2;ATP2A3;ATP5A1;ATP5B;ATP5J;ATP5J2;ATP6V1H;ATP8B1;ATP8B2;ATXN1L;AVPR2;AXIN1;AXIN2;B3GALT4;BACE1;BACH2;B

/1D;ATP6V1F;ATP6V1H;ATP8B1;AXIN1;AXIN2;BACE1;BAD;BAG3;BAHD1;BAIAP2L1;BATF;BAZ18;BBS1;BBS2;BBS9;BCL10;BCL2;BCL9L;BET1L;BEX1;BICD1;BID;BIK;BIRC6;BLCA;BLM;BLMH;BLOC1S1;BMP2;BMP8A;BMP8B;BPTF;BRD1;BRD2;BRD7;BRSK2;BTBD11;BTBD2;BTRC;C1D;C22orf28;C22orf29;C9orf89;7;CP5F3;CREB3L2;CREG1;CREM;CRTC1;CRTC3;CRY2;CSNK2A2;CSRNP2;CSTF1;CSTF2;CSTF3;CTCF;CTNBL1;CTR9;CYTL1;DARS2;DBR1;DCP1B;DDIT3;DDX17;DDX20;DDX23;DDX46;DDX47;DDX51;DDX52;DDX56;DDX6;DFFA;DFFB;DFNB31;DGKQ;DHCR24;DHX15;DHX33;DHX9;DIAPH1;DIEXF;DIS3L;DKC1;DNAH1;DNAJA3;DNAJB1;DNAJC7;DNHD1;DNM1;DNMT1;DNMT3A;DRG1;DROSHA;DST;DSTYK;DTL;DYNC1H1;DYNC1I2;DYNC1LI2;ZJDHD2;DDX17;DDX18;DDX20;DDX24;DDX31;DDX46;DDX47;DDX51;DDX52;DDX56;DDX6;DFFA;DFFB;DFNB31;DGKQ;DHCR24;DHX15;DHX33;DHX9;DIAPH1;DIEXF;DIS3L;DKC1;DNAH1;DNAJA3;DNAJB1;DNAJC7;DNHD1;DNM1;DNMT1;DNMT3A;DRG1;DROSHA;DST;DSTYK;DTL;DYNC1H1;DYNC1I2;DYNC1LI2;EJDHD2;DDX17;DDX18;DDX20;DDX24;DDX31;DDX46;DDX47;DDX51;DDX52;DDX56;DDX6;DFFA;DFFB;DFNB31;DGKQ;DHCR24;DHX15;DHX33;DHX9;DIAPH1;DIEXF;DIS3L;DKC1;DNAH1;DNAJA3;DNAJB1;DNAJC7;DNHD1;DNM1;DNMT1;DNMT3A;DRG1;DROSHA;DST;DSTYK;DTL;DYNC1H1;DYNC1I2;DYNC1LI2;E

JPV3L1;TOP2B;VCP;WRNIP1;XRCC3;XRCC5;XRI;BRD2;BRD7;BRPF1;BRSK2;BTRC;C14orf169;C1D;C1GALT1C1;C22orf28;C2CD3;CAD;CALM3;CALR;CAMTA2;CANO2;CAPN2;CAPN3;CAPNS;CARD11;CARD14;CASP1;CASP10;CASP2;CBFA2T2;CBLB;CBX2;CBX5;CBX7;CCAR1;CCDC23;CCDC88C;CCL8;CCND1;CCND2;CCNF;CCNT1;CCR7;CCT3;CCTS;CCT6A;CCT7;CCP1;PTK2;RBL2;RBM19;RBM28;RBM4B;RCC2;RCL1;RNF20;RNMT;RPP21;RRN3;RRP1B;RSL1D1;SDAD1;SENP5;SMG6;SNAPIN;SPG11;SPTBN1;SRP68;SRF5;SSRP1;TAOK2;TCOF1;TEX10;TFCP2L1;THTPA;TP53;TRIM68;TSPYL2;TSR1;TTF1;UBE2I;UBTF;URB1;URB2;USP36;UTP14A;UTP20;WDR3;WDR55;WHSC1;ZJDHD2;DDX17;DDX18;DDX20;DDX24;DDX31;DDX46;DDX47;DDX51;DDX52;DDX56;DDX6;DFFA;DFFB;DFNB31;DGKQ;DHCR24;DHX15;DHX33;DHX9;DIAPH1;DIEXF;DIS3L;DKC1;DNAH1;DNAJA3;DNAJB1;DNAJC7;DNHD1;DNM1;DNMT1;DNMT3A;DRG1;DROSHA;DST;DSTYK;DTL;DYNC1H1;DYNC1I2;DYNC1LI2;EJDHD2;DDX17;DDX18;DDX20;DDX24;DDX31;DDX46;DDX47;DDX51;DDX52;DDX56;DDX6;DFFA;DFFB;DFNB31;DGKQ;DHCR24;DHX15;DHX33;DHX9;DIAPH1;DIEXF;DIS3L;DKC1;DNAH1;DNAJA3;DNAJB1;DNAJC7;DNHD1;DNM1;DNMT1;DNMT3A;DRG1;DROSHA;DST;DSTYK;DTL;DYNC1H1;DYNC1I2;DYNC1LI2;E

P18;DDIT3;DDX17;DDX20;DDX23;DDX24;DDX46;DDX47;DDX51;DDX56;DDX6;DHX15;DHX16;DHX33;DHX35;DHX38;DHX9;DIDO1;DIS3L;DKC1;DNAJA3;DNMT1;DNMT3A;DRG1;DROSHA;DVL2;EARS2;ECD;EDC3;EDC4;EFTUD2;EHMT1;EIF2AK3;EIF4A3;EIF4B;EIF4G1;EIF4G2;ELAVL1;ELP3;EPRS;ERCC3;ETS1;EXC1LD1;AQP3;AQR;ARG1;ARHGAP15;ARHGAP17;ARHGAP18;ARHGAP29;ARHGAP32;ARHGAP33;ARHGAP35;ARHGAP39;ARHGFE1;ARHGFE16;ARHGFE18;ARHGFE3;ARHGFE4;ARHGFE5;ARHGFE6;ARHGFE7;ARHGFE9;ARID1B;ARIH2;ARL10;ARL13A;ARL3;ARNTL2;ARPC2;ARPC3;ASB1;ASB16;ASCC1;ASMT;ASPDH;C;CHMP5;CHMP7;CIAO1;CKAP5;CKM;CMBL;CNDP2;CNOT10;CNTRL;COG5;CSNK1E;CSNK2A2;CTPS2;CUBN;CUL1;CUL7;DCP1B;DCTD;DCTN1;DCTN5;DDIT4;DDX20;DDX6;DFFA;DFFB;DGKA;DGKQ;DHCR24;DNAJA3;DOCK9;DPP9;DPYSL2;DUSP7;DVL2;DYNC1H1;DYNC1I2;DYNC1LI2;EDC3;EDC4;EEF2;EEF2K;EIF2;MARS;IMBD2;MECP2;MRPL16;MRPL44;MRPS5;MSI2;MTPAP;NCL;NOL9;NOM1;NONO;NOP14;NSUN2;NXF1;PA2G4;PABPC1;PABPC1L;PABPC4;PARN;PDCD11;PDCD4;PET112;PINX1;PNO1;POLDIP3;PPARGC1B;PPRC1;PRPF8;PSPC1;PTBP1;PUM1;PUS3;RAVER1;RBFOX2;RBM14;RBM15B;RBM17;RBM19;RBM5F2;TARDBP;TFIP11;TGS1;THOC1;THOC2;TNKS1BP1;U2AF114;U2AF2;USP39;WBP11;WDR33;ZRS

;GLUD1;GNL3L;GOT2;GPRC5C;GPT2;GRAMD4;GRPEL1;H6PD;HADH;HADHA;HADHB;HCFC1;HEATR1;HEBP2;HEMK1;HERC2;HKDC1;HLCS;HSP90AB1;HSPA1L;HSPA9;HSPD1;HTRA2;IARS2;IBAS7;IDH3A;ILF3;IMMT;ISCA2;IVD;JTB;KARS;KIAA0141;KRT5;KYNU;LARS2;LDHA;LETM1;LIG1;LIPT2;LOC494141;LYRM11;COG2;CORO2A;COX10;CROCC;CSR2BP;CTC1;CTCF;CTR9;CXCL1;DARS2;DCLRE1C;DCTN1;DFFB;DHODH;DIAPH1;DKC1;DNAJA3;DNM1;DNMT1;DNMT3A;DOCK7;DOPEY2;DPYSL2;DST;DYNC1H1;DYNC1LI2;DYNTL1;EARS2;EFTUD1;EHMT1;EIF2AK3;EP400;EPB41L2;EPAH1;EPS8;ETS1;EVL;EZR;FEN1;FGD1;FIT

HOSPH8;MSH6;MTA2;MYC;MYO18A;NASP;NCAPD2;NCAPD3;NCAPG;NCAPG2;NEIL2;NF2;NFRKB;NONO;NTSE;NYNRIN;PALB2;PADP7;PARP1;PAXIP1;PDGFC;PHF13;PINX1;PLD6;PMS2;PMS2CL;PMS2P5;POLA1;POLA2;POLB;POLE;POLE3;POLG;POLH;POLR2B;POLR2C;POLR2J;PRPF19;PTTG2;RAD18;RAD51D;SCMH1;SEH1L;SEPT6;SETD1A;SIN3B;SLX4;SMARCA4;SMARCC1;SMARCC3;SMARCE1;SMC1A;SMG6;SNW1;SOX18;SSRP1;SUPT16H;SYCE2;TADA2A;TBP;TCF3;TCF7L2;TCP1;TEP1;TERF2;TERF2IP;TEX12;TIMELESS;TNKS1BP1;TOP2B;TP53;TP53BP1;UBE2B;UBE2I;UHRF1;VCP;WHSC1;XRCC5;XRCC6;ZMIZ2;ZNF39OLE;POLE3;PRKCA;PRMT2;PTTG2;RBBP4;RBBP7;RBL2;RBM14;RFC1;RNF20;RNF4;RNF8;RPA1;RPA2;RUVBL1;SATB1;SCMH1;SEH1L;SMARCA4;SMARCC1;SMARCC2;SMARCD1;SMARCC3;SMARCE1;SMC1A;SMG6;SNW1;SRCAP;SUPT16H;SUPT4H1;SUPT6B;SUPV3L1;TADA2A;TAF1

XI18;SYCE2;TBP;TCF3;TCF7L2;TCP1;TEP1;TERF2;TERF2IP;TEX12;TIMELESS;TNKS1BP1;TOP2B;TP53;TP53BP1;UBE2B;UBE2I;UHRF1;VCP;XRCC5;XRCC6;ZMIZ2;ZNF330;ZW

;MMS19;MYC;MYCBP;MYCBP2;NAV1;NCAPG;NEIL2;NEURL4;NICN1;NINL;NPHP4;NSUN2;NUMA1;NUP62;ODF2;OTUD7B;PCIF1;PCM1;PCNT;PDE4DIP;PEA15;PINX1;PLEKHA7;POLB;POLR2C;PRC1;PRPF19;PTK2;RAB11FIP3;RAB3GAP1;RABGAP1;RACGAP1;RANBP10;RCC2;RNF4;RPL11;RPS6KA2;RTTN;RUVBL1

;UBR4;UBR7;UHRF1;UNKL;VHL;YAIO80;KIF13B;KIF16B;KIF21B;KIF3B;KIF4A;KIF5C;KLC1;KLC2;LONP2;LSG1;MACF1;MCM2;MCM3;MCM4;MCM6;MDN1;MLH1;MSH6;MYH3;MYH7B;MYO15A;MYO18A;MYO19;MYO1C;MYO1D;MYO1E;MYO5B;MYO9B;NAV1;PCYOX1;PMS2;PMS2P5;PMS4;PSMD6;RAB11A;RABL2A;RABL2B;RAD51D;RAD54L2;EATS2;ZMYN;KDM1A;KDM4A;KDM4C;KIF13B;KIF16B;KIF3B;LAX1;LCK;LDB1;LONP2;LPIN1;LUC7L2;MAD2L2;MAP2K6;MAP2K7;MAP3K12;MAPK7;MAPK8IP3;MAPK9;MAPKAP1;MAPT;MAVS;MDM4;MTA1;MUL1;MYO5B;NCOR2;NEDD8;NEK9;NFRKB;NLRP1;OCRL;PA2G4;PAM;PARD6A;PARN;PCCA;PDE4DIP;PDPK1;PEX2E;HGFE9;ARL3;ARPC2;ASMT;ATF6B;ATG13;ATG14;ATG3;ATG9B;ATIC;ATM;ATN1;ATOX1;ATP10A;ATP1A1;ATP1A3;ATP1B3;ATP2A2;ATP2A3;ATP5A1;ATP5B;ATP5J;ATP5J2;ATP6V0E1;ATP6V1D;ATP6V1F;ATP6V1H;ATP6V1I;ATP8B1;ATP9B;ATXN2L;AVPR2;AXIN1;AXIN2;B3GALT4;BACE1;BAD;BAG3;BAIAP2L1;BCL10;BCL4;HELB;HSPA8;HSPD1;IN080;KIF13B;KIF16B;KIF21B;KIF3B;KIF4A;KIF5C;KLC1;KLC2;LONP2;LSG1;MACF1;MCM2;MCM3;MCM4;MCM6;MDN1;MLH1;MSH6;MYH3;MYH7B;MYO15A;MYO18A;MYO19;MYO1C;MYO1D;MYO1E;MYO5B;MYO9B;NAV1;NUDT9;PCYOX1;PMS2;PMS2P5;PMS4;PSMD6;RAB11A;RA4;HELB;HSPA8;HSPD1;IN080;IRGM;KIF13B;KIF16B;KIF21B;KIF3B;KIF4A;KIF5C;KLC1;KLC2;LONP2;LSG1;MACF1;MCM2;MCM3;MCM4;MCM6;MDN1;MLH1;MSH6;MYH3;MYH7B;MYO15A;MYO18A;MYO19;MYO1C;MYO1D;MYO1E;MYO5B;MYO9B;NAV1;NUDT9;PCYOX1;PMS2;PMS2P5;PMS4;PSMD6;RAB11A;RAYAL1;ILF3;INCA1;INCCENP;ING1;ING2;INGS;IN080;INTS7;TBH;KHDRBS1;KIF3B;KLF11;KNTC1;KRT7;L3MBTL1;LEF1;LIG1;LIG3;LMLN;LRP5;LSM10;LZTS2;MACF1;MAD2L1BP;MAD2L2;MADD;MAP2K6;MAP4;MAPK7;MAPRE2;MCM2;MCM3;MCM4;MCM6;MDC1;MDM4;MLH1;MND1;MNS1;MNT;MPHOSPH8;M

TF1;CSTF2;CSTF3;CTC1;CTCF;CTR9;CYTL1;DAD1;DARS2;DCN;DDIT3;DDX17;DDX20;DHDD3;DHX33;DHX38;DIDO1;DKC1;DNAJA3;DNAJ1;DNMT1;DNMT3A;DPH1;DRG1;DTL;DVL2;EARS2;ECD;EDEM1;EEF2;EEF2K;EHMT1;EIF2AK3;EIF2AK4;EIF2B1;EIF2S3;EIF3A;EIF3B;EIF4A3;EIF4B;EIF4G1;EIF4G2;EIF5A;EIF5B;SPYL2;TTF1;UBE2B;UHRF1;YEA1

55;NUP188;NUP205;NUP210;NUP214;NUP62;NUP93;NXF1;OGDH;PAM16;PARP1;PCM1;P4KB;PLD6;POLA1;POLG;POM121;POM121C;POU6F1;PRKCA;RETSAT;RNF43;S100A6;SAMM50;SCO1;SCO2;SCRN1;SDHA;SDHB;SEH1L;SFXN1;SFXN2;SFXN3;SIGMAR1;SLC25A12;SLC25A15;SLC25A23;SLC25A27;SLC25IE;CD3EAP;CD4;CD74;CDAN1;CDH13;CDK5RAP2;CDKN2A;CDKN2B;CDON;CECR1;CELSR2;CHCHD3;CHD2;CHD3;CHD4;CHD6;CHEK2;CHST12;CHTF8;CIAO1;CIC;CITA;CINP;CIRBP;CIRH1A;CIZ1;CKM;CLK2;CLN8;CMKLR1;CNDP2;COG2;COG7;COL5A1;COX10;COX15;CP5F3;CREB3L2;CREG1;CREM;CRTC1;CRTC3;C

CRTC1;CRTC3;CRY2;CSNK2A2;CSRNP2;CSTF1;CSTF2;CSTF3;CTC1;CTCF;CTR9;CYTL1;DAD1;DARS2;DCN;DDIT3;DDX17;DDX20;DHDD3;DHX33;DHX38;DIDO1;DKC1;DNAJA3;DNAJ1;DNMT1;DNMT3A;DPH1;DRG1;DTL;DVL2;EARS2;ECD;EDEM1;EEF2;EEF2K;EHMT1;EIF2AK3;EIF2AK4;EIF2B1;EIF2S3;EIF3A;EIF3B;EIF4A3;EIF4B;EIF4G1;EIF4G2;EIF5A;EIF5B;SPYL2;TTF1;UBE2B;UHRF1;YEA1

CM1;PCNT;PHF13;PIM3;PINX1;PKD1;POG2;POLA1;POLA2;POLE;PPP1R9B;PPP2R5C;PRC1;PRKCA;PRMT2;PSMC4;PSMD1;PSMD11;PSMD2;PSMD6;PSMD7;PSME4;RACGAP1;RBBP4;RBL2;RCC2;RFC1;RFWD3;RNF8;RPA1;RPA2;RPS6KA2;RUVBL1;SCRIB;SEH1L;SFI1;SH2B1;SIK1;SMAD3;SMARCA4;SMC1A;SUN2;CD3EAP;CD4;CD74;CDAN1;CDH13;CDK5RAP2;CDKN2A;CDKN2B;CDON;CECR1;CELSR2;CHCHD3;CHD2;CHD3;CHD4;CHD6;CHEK2;CHST12;CHTF8;CIAO1;CIC;CITA;CINP;CIRBP;CIRH1A;CIZ1;CKM;CLK2;CLN8;CMKLR1;CNDP2;COG2;COG7;COX10;COX15;CP5F3;CREB3L2;CREG1;CREM;CRTC1;CRTC3;CRY2;CSNK





IUPT6H;TAF1;TAF10;TAF6;TARDBP;TBP;TCEB1;TCEB3;THOC1;THOC2;TNF;TNFRSF14;TP53;UBE2I;UBR4;UNG;USP7;VDAC1;VPRBP;XRCC5;XRCC6;YWHAE;ZC3H7B;ZKSCAN1;ZKSCAN2;ZKSCAN5;ZNF263;ZNF397;ZNF445;ZNF496;ZSCAN16;ZSCAN2;ZSCAN21;ZSCAN22;ZSCAN

IUPT6H;TAF1;TAF10;TAF6;TARDBP;TBP;TCEB1;TCEB3;THOC1;THOC2;TNF;TNFRSF14;TP53;UBE2I;UBR4;UNG;USP7;VDAC1;VPRBP;XRCC5;XRCC6;YWHAE;ZC3H7B;ZKSCAN1;ZKSCAN2;ZKSCAN5;ZNF263;ZNF397;ZNF445;ZNF496;ZSCAN16;ZSCAN2;ZSCAN21;ZSCAN22;ZSCAN  
CC5;ETS1;FAF1;FAIM3;FCER1G;FGD1;FGF2;FGFR1;FGGY;FLT4;FLVCR1;FOXC1;FXN;FYN;GOS2;GADD45A;GARS;GATA3;GLS2;GRAMD4;HDAC1;HGF;HSP90A1;HSP90B1;HSPA9;HSPD1;HTATIP2;HTRA2;HTT;HYAL2;ID1;IKBP;IKBKE;IKZF3;IL10;IL18;IL2RA;IL2RB;IL31RA;IL4;ING1;ING2;ING5;INTS1;IP6K2;ITGA6;IT  
;USP35;USP36;USP39;USP40;USP48;USP54;USP7;V  
P;GK5;GNE;GOT1;GOT2;GPHN;GPT;GPT2;GSTM4;GSTO1;GTF3C4;GUCY2D;GYS1;GYS2;HADHA;HADHB;HCFC1;HEMK1;HHAT;HKDC1;HMGXB3;HRASL2;HYAL1;IBA57;ICMT;IKBKB;IKBKE;ILF2;IP6K2;IRAK1;ITPKB;KALRN;KAT6B;LCK;LIPT2;LMTK3;MAP2K6;MAP2K7;MAP3K12;MAP3K4;MAP3K9;MAPK7;MAPK9  
CC5;ETS1;FAF1;FAIM3;FCER1G;FGD1;FGF2;FGFR1;FGGY;FLT4;FLVCR1;FOXC1;FXN;FYN;GOS2;GADD45A;GARS;GATA3;GLS2;GRAMD4;HDAC1;HGF;HSP90A1;HSP90B1;HSPA9;HSPD1;HTATIP2;HTRA2;HTT;HYAL2;ID1;IKBP;IKBKE;IKZF3;IL10;IL18;IL2RA;IL2RB;IL31RA;IL4;ING1;ING2;ING5;INTS1;IP6K2;ITGA6;IT  
NODAL;NR1D1;NRG1;NRIP2;PA2G4;PARP1;PASK;PATZ1;PDCD4;PER1;PPARA;PPARD;PPARGC1B;PRMT2;RAMP3;RBBP7;RBF2;RELA;RFK5;RNF8;RREB1;RUNX2;RUNX3;SALL2;SAP30;SATB1;SCMH1;SFPO;SIK1;SIN3B;SLA2;SMAD3;SMARCA4;SMARCC2;SMARCE1;SMC1A;SNW1;SNX6;SOX10;SOX18;SREBF2;  
P3;ERCC3;ETS1;EZH1;FADS1;FGF2;FGFR1;FLNA;FOSB;FOXC1;FOXJ1;FOXJ3;FOXP1;FOXP2;FOXP3;FOXP4;FUBP1;GABPB2;GATA3;GMEB2;GON4L;GTF2A2;GTF3C1;GTF3C2;GTF3C4;HABP4;HCFC1;HDAC1;HELB;HEXIM1;HGF;HHEX;HIC2;HIF1AN;HMG20A;HMGA1;HNRNPAB;HOMEZ;HOXA9;HOXI

;PIK3R4;PI3;PIP4K2A;PIP4K2B;PIP5K1C;PKN3;POLA1;POLA2;POLB;POLE;POLE3;POLG;POLH;POLR1A;POLR1B;POLR2B;POLR2C;POLR2J;POLR3A;POLR3B;POLR3C;POLR3E;PPIP5K1;PRKAG1;PRKCA;PRKCH;PRKCQ;PRKX;PRPS1;PTK2;RIOK1;RPAP1;RPS6KA2;SBK1;SEPH2;SGK1;SGK196;SGK223;SGK494;SHC1;  
VADD;MAGED1;MAP2K6;MAP2K7;MAP3K4;MAP3K9;MAPK8IP3;MAVS;MBTPS1;MLL;MSH6;MUL1;MYC;MYO9B;NCKAP1L;NET1;NLRP1;NOD1;NODAL;NRG1;OCRL;PDE6H;PDGFC;PDIA5;PDIA6;PDPK1;PHACTR4;PILRB;PITRM1;PKD1;PLCG1;PPARGC1B;PRKAG1;PRKCA;PRKCH;PRKCQ;PRLR;PSENE1;PSMC4;PS

'DA

J3;FOXX1;FOXX2;FOXM1;FOXP1;FOXP4;GABPB2;GATA3;GMEB2;GON4L;GTF2A2;HABP4;HCFC1;HDAC1;HEXIM1;HGF;HHEX;HIC2;HIF1AN;HMG20A;HMGA1;HNRNPA2B1;HNRNPAB;HNRNPH1;HSBP1;HSPA8;HTATIP2;HTATSF1;HYAL2;ID1;IKBKAP;IKBKB;IKZF3;IL10;IL16;IL26;IL31RA;IL4;ILF2;ILF3;ING1;ING2;IP  
;MAPK8IP3;MAPK9;MATN2;MBTPS1;MDC1;MDM4;MGST1;MINK1;MLH1;MMS19;MRPS9;MSHG;MTOR;MUL1;MYBBP1A;MYC;NEIL2;NET1;NFATC2;NFRKB;NOD1;NONO;NRBP2;OMG;PALB2;PAPD7;PARP1;PAXIP1;PDCD4;PDIA5;PDIA6;PMS2;PMS2CL;PMS2P5;POLA1;POLB;POLE;POLG;POLH;POLR2B;POLR2  
DVL2;ECD;EHMT1;EIF2AK3;EIF2AK4;EIF2B1;EIF3B;EIF4A3;EIF4B;EIF4G1;EIF4G2;EIF5A;EIF5B;ELAVL1;ELP3;EPRS;ERCC3;ETS1;EZH1;F2;FADS1;FAM132A;FGF2;FGFR1;FITM2;FLNA;FOSB;FOXC1;FOXJ1;FOXJ3;FOXK1;FOXK2;FOXN1;FOXP1;FOXP4;GABBR1;GABPB2;GATA3;GCN1L1;GIPR;GMEB2;GON4L;G  
DM1A;KDM2B;KDM4A;KHDRBS1;KLF11;L3MBTL1;LANCL2;LAX1;LDB1;LEF1;LIG3;LPIN1;LRP5;LRP8;MAD2L2;MAGED1;MBD1;MBD2;MDM4;MECP2;MEIS2;MLH1;MLL4;MPHOSPH8;MSH6;MTA2;MXD3;MYBBP1A;MYC;NAB2;NAC1;NCOR2;NF2;NFX1;NKAP;NODAL;NR1D1;NRG1;NRIP2;NXN;PA2G4;PABPC1;  
IRGC1B;PRMT2;PTBP1;RAMP3;RBBP7;RBF2;RELA;RFK5;RREB1;RUNX2;RUNX3;SALL2;SAP30;SATB1;SCMH1;SFPO;SIK1;SIN3B;SLA2;SMAD3;SMARCA4;SMARCC2;SMARCE1;SNW1;SNX6;SOX10;SOX18;SREBF2;SUFU;SUPT4H1;TAF3;TARDBP;TCF7L2;TFCP2L1;TGIF2;THRA;TIMELESS;TLE1;TNF;TP53;TXN;U2A

IACC1;NCOR2;NF2;NFX1;NKAP;NODAL;NR1D1;NRG1;NRIP2;PA2G4;PARP1;PASK;PATZ1;PDCD4;PER1;PPARA;PPARD;PPARGC1B;PRKCA;PRMT2;RAMP3;RBBP7;RBF2;RELA;RFK5;RNF8;RREB1;RUNX2;RUNX3;SALL2;SAP30;SATB1;SCMH1;SFPO;SIK1;SIN3B;SLA2;SMAD3;SMARCA4;SMARCC2;SMARCE1;SMC1

;PPARD;PPARGC1B;PRMT2;RAMP3;RBBP7;RBF2;RELA;RFK5;RREB1;RUNX2;RUNX3;SALL2;SAP30;SATB1;SCMH1;SFPO;SIDT1;SIDT2;SIK1;SIN3B;SLA2;SMAD3;SMARCA4;SMARCC2;SMARCE1;SND1;SNW1;SNX6;SOX10;SOX18;SREBF2;SRRT;SUFU;SUPT4H1;TAF3;TCF7L2;TFCP2L1;TGIF2;THRA;TIMELESS;TLE1  
;D;EHMT1;EIF2AK3;EIF2AK4;EIF2B1;EIF3B;EIF4A3;EIF4B;EIF4G1;EIF4G2;EIF5A;EIF5B;ELAVL1;ELP3;EPRS;ERCC3;ETS1;EZH1;FADS1;FAM132A;FGF2;FGFR1;FITM2;FLNA;FOSB;FOXC1;FOXJ1;FOXJ3;FOXK1;FOXK2;FOXN1;FOXP1;FOXP4;GABBR1;GABPB2;GATA3;GCN1L1;GIPR;GMEB2;GON4L;GRM2;GTF2

VAMP1;VAT1;VDAC1;VDA

RNII

RABL2A;RABL2B;RACGAP1;RAP1GDS1;RASA3;RASA4;RASAL3;RGS13;RGS17;RHOF;RYR2;SCRIB;SNX9;SYDE1;SYNGAP1;TAX1BP3;TBC1D7;TBCC;TSC1;UCK2;UHRF1;WRNI

E2I;VCP;WBP1;WBP11;YWHAE;XZI



'A8;HYAL2;ID1;IL10;IL4;ILF3;INCA1;INPPL1;IRF8;JAZF1;KAT6B;KCTD1;KDM1A;KDM2B;KDM4A;KHDRBS1;KIAA0226;KLF11;L3MBTL1;LANCL2;LAX1;LDB1;LEF1;LIG3;LPIN1;LRP5;LRP8;MAD2L2;MAGED1;MBD1;MBD2;MDM4;MECP2;MEIS2;MLH1;MLL4;MPHOSPH8;MSH6;MTA2;MTOR;MXD3;MYBBP1A;MYC;P  
IXK2;FOXM1;FOXP1;FOXP4;GABPB2;GATA3;GMEB2;GON4L;GTF2A2;HABP4;HCFC1;HDAC1;HEXIM1;HGF;HHEX;HIC2;HIF1AN;HMG20A;HMGA1;HNRNPAB;HSBP1;HSPA8;HTATIP2;HTATSF1;HYAL2;ID1;IKBKAP;IKKBK;IKZF3;IL10;IL16;IL26;IL31RA;IL4;ILF2;ILF3;ING1;ING2;ING5;INO80;IRAK1;IRF8;ITGA6;JAZF1;  
'7;RBFOX2;RELA;RFX5;RREB1;RUNX2;RUNX3;SALL2;SAP30;SATB1;SCMH1;SFPQ;SIK1;SIN3B;SLA2;SMAD3;SMARCA4;SMARCC2;SMARCE1;SNW1;SNX6;SOX10;SOX18;SREBF2;SUFU;SUPT4H1;TAF3;TCF7L2;TCF2L1;TGIF2;THRA;TIMELESS;TLE1;TNF;TP53;TXN;UBE2B;UBE2I;UHFRF1;VHL;WHSC1;XRCC5;XRCC6;  
NAB2;NACC1;NCOR2;NF2;NFX1;NKAP;NODAL;NR1D1;NRG1;NRIP2;PA2G4;PARP1;PASK;PATZ1;PCD4;PER1;PPARA;PPARD;PPARGC1B;PRKCA;PRMT2;RAMP3;RBBP7;RBFOX2;RELA;RFX5;RNF8;RREB1;RUNX2;RUNX3;SALL2;SAP30;SATB1;SCMH1;SFPQ;SIK1;SIN3B;SLA2;SMAD3;SMARCA4;SMARCC2;SMARCE

;FNBP1;FRMD4A;FSCN2;FYN;GPHN;GRIN2C;GYS2;HAUS5;HERC2;HNRNP1;HSBP1;HSPH1;INCENP;INO80;INPP5B;INPP5E;INPPL1;INVS;IP6K2;IPP;JTB;KALRN;KARS;KDM4A;KIAA0368;KIAA0586;KIAA0753;KIF13B;KIF16B;KIF21B;KIF3B;KIF4A;KIF5C;KITLG;KLC1;KLC2;KLHL3;KNTC1;KRT10;KRT5;KRT7;KRTAP5-

2;KNTC1;KRT10;KRT5;KRT7;KRTAP5-1;LANCL2;LCK;LDLRAP1;LPXN;LZTS2;MACF1;MAD2L1BP;MAD2L2;MAP1A;MAP1LC3B2;MAP4;MAP7D3;MAPRE2;MAPT;MCM3;MID2;MINK1;MMS19;MNS1;MYC;MYCBP;MYH3;MYH7B;MYO15A;MYO18A;MYO19;MYO1C;MYO1D;MYO1E;MYO5B;MYO9B;MYOM1;NAV1

IXK2;FOXM1;FOXP1;FOXP4;GABPB2;GATA3;GMEB2;GON4L;GTF2A2;HABP4;HCFC1;HDAC1;HEXIM1;HGF;HHEX;HIC2;HIF1AN;HMG20A;HMGA1;HNRNPAB;HSBP1;HSPA8;HTATIP2;HTATSF1;HYAL2;ID1;IKBKAP;IKKBK;IKZF3;IL10;IL16;IL26;IL31RA;IL4;ILF2;ILF3;ING1;ING2;ING5;INO80;IRAK1;IRF8;ITGA6;JAZF1;

O1;LMO2;LPIN1;LRP5;LRP8;LSM10;MAD2L2;MAGED1;MAGOH;MAPK7;MAVS;MBD1;MBD2;MCF2L;MDM4;MECP2;MED24;MED27;MED30;MED31;MED6;MEIS2;MKL1;MLL;MNT;MTA2;MYC;NCOR2;NEDD8;NFATC2;NFATC3;NFE2L1;NFRKB;NFX1;NKAP;NLRC5;NMI;NODAL;NPAS2;NR1D1;NRF1;NRIP2;PAM;  
P1;NOD1;NODAL;NRG1;OCRL;PDE6H;PDGFC;PDIA5;PDIA6;PDPK1;PHACTR4;PILRB;PITRM1;PKD1;PLCG1;PPARGC1B;PRKAG1;PRKCA;PRLR;PSEENEN;PSMC4;PSMD1;PSMD11;PSMD2;PSMD6;PSMD7;PSME4;PTK2;RAB3GAP1;RABGAP1;RACGAP1;RAP1GDS1;RAPGEF1;RASA3;RASA4;RASAL3;RFC1;RGS13;RGS1

RASAL3;RGS13;RGS17;RHOF;SCRIB;SNX9;SYDE1;SYNGAP1;TAX1BP3;TBC1D7;TBCC;TSC1;UCK2;WRNI

'OLR2;PPIPSK1;PRKAG1;PRKCA;PRKCH;PRKCQ;PRKX;PRPS1;PTK2;RIOK1;RPS6KA2;SBK1;SEPHS2;SGK1;SGK196;SGK223;SGK494;SHC1;SHPK;SIK1;SIK2;SRPK3;STK16;STK36;STK38;STK39;TAF1;TAOK2;TNIK;TNK2;TRIO;TRRAP;TSSK3;TSSK4;TXK;TYK2;UCK2;UL

<A2;SBK1;SGK1;SGK196;SGK223;SGK494;SHC1;SHPK;SIK1;SIK2;SRPK3;STK16;STK36;STK38;STK39;TAF1;TAOK2;TNIK;TNK2;TRIO;TRRAP;TSSK3;TSSK4;TXK;TYK2;UCK2;UL

Y2;DRAM1;DRD4;DST;DTL;EDEM1;EFHD1;EHD4;EIF2AK3;EIF5A;EMD;ENTPD4;ENTPD5;EPHX1;ETFDH;EXOG;EXT2;FADS1;FADS2;FAF1;FAM20B;FITM2;FKRP;FNDC5;FUT11;FUT2;FZR1;GABARAPL2;GAL3ST4;GALNT10;GALNT6;GALNT9;GBF1;GGA3;GGCX;GGTA1P;GLG1;GOLGA1;GOLGA3;GOLGA7;GORASP2;C

'B;WNT6;YIF1A;ZDHHC1;ZFPM1;ZNF219;ZNF35;ZNF358;ZNF414;ZNF444;ZNF564;ZNF575;ZNF579;ZNF628;ZNF638;ZNF668;ZNF747;ZNF764;ZNF771;ZNF784;ZNF787;ZNF837;ZNF865;ZSCAN

28;ZNF638;ZNF668;ZNF747;ZNF764;ZNF771;ZNF784;ZNF787;ZNF837;ZNF865;ZSCAN

F6;NUDT3;NUTF2;OAT;OTUD7A;OXT;PABPN1;PCSK1N;PDF;PDXP;PDZD7;PEX10;PGLYRP2;PHOSPHO1;PLSCR3;PODXL2;PRDM8;PSD3;RASL10A;RDH14;REPIN1;RNF126;RPP25;RRAS;SCARF2;SCGB3A1;SKOR1;SNRPA;SOCS1;SQLE;SSBP4;STBD1;STK11;SUV420H2;TAF6L;TBX6;TCTEX1D4;TIGD5;TMEM102;TOR2

AF6L;TBX6;TFR2;TOR2A;TPRA1;TPST2;UCN;UFSP2;UGP2;USF2;USP33;UTF1;VAPB;WNT6;YIF1A;ZDHC1;ZFPM1;ZNF219;ZNF35;ZNF358;ZNF414;ZNF444;ZNF564;ZNF575;ZNF579;ZNF628;ZNF638;ZNF668;ZNF747;ZNF764;ZNF771;ZNF784;ZNF787;ZNF837;ZNF865;ZSCAI

SQLE;STK11;SUV420H2;TAF6L;TBX6;TFR2;TOR2A;TPRA1;TPST2;TRADD;UACA;UCN;UFSP2;UGP2;USF2;USP33;UTF1;VAPB;WNT6;YIF1A;ZDHC1;ZFPM1;ZNF219;ZNF35;ZNF358;ZNF414;ZNF444;ZNF564;ZNF575;ZNF579;ZNF628;ZNF638;ZNF668;ZNF747;ZNF764;ZNF771;ZNF784;ZNF787;ZNF837;ZNF865;ZSCAI



;CD99;CDC25A;CDC6;CDCA8;CDK12;CDK13;CDS2;CDYL2;CECR5;CEL;CEL2;CEL6;CEMP1;CENPF;CENPM;CENPT;CEP55;CHCHD5;CHD7;CHMP4A;CHMP6;CHRAC1;CHTF18;CIB1;CISD3;CLASP1;CLCN4;CLIP1;CLPP;CLSPN;CNT  
;DOLK;DPM3;DPP7;DRG2;DSE;DTYMK;DUS2L;DUSP10;DUSP23;DUSP3;DVL1;DYM;DYNC1L1;ECI1;EEF1A2;EEF1D;EEF1G;EHHADH;EIF2B2;EIF2B4;EIF3F;EIF3G;EIF3I;EIF3K;EIF4G3;ELK3;ENGASE;ENTPD7;ERIG3;ERLIN2  
S2;CDYL2;CECR5;CEL;CEL2;CEL6;CEMP1;CENPF;CENPM;CENPT;CEP55;CHCHD5;CHD7;CHMP4A;CHMP6;CHRAC1;CHTF18;CIB1;CISD3;CLASP1;CLCN4;CLIP1;CLPP;CLSPN;CNTLN;COL11A2;COL6A1;COL6A2;COL9A2;COMMD4  
;MMMD4;COMTD1;COQ7;COQ9;COX411;CPSF3L;CPSF4;CPT1C;CREB3;CREB3L4;CRELD2;CRIP1;CRIP2;CRYL1;CSD1;CSNK1G1;CTSC;CTSF;CTU2;CUEDC2;CYC1;CYP1B1;CYP2E1;DAAM1;DALRD3;DCUN1D3;DDT;DDX28;DDX39A;DEA  
D2B;FASTK;FBL;FBXL15;FBXL6;FBXO2;FBXO24;FBXW11;FBXW5;FDXR;FEM1B;FICD;FIGLN2;FKBP11;FKBP2;FLAD1;FPGS;FUK;FXDY2;GAMT;GCDH;GFER;GLYCTK;GNAI3;GNG8;GNGT2;GPX4;GSTT1;GTPBP3;GYG1;GZMM;HAGHL;HCSS;HD  
;PTC7;PTGES2;PTRH1;PUS1;QARS;QTRT1;RHOT2;RNMTL1;SARDH;SARS2;SDHAF1;SDHAF2;SIRT3;SIVA1;SLC25A19;SLC25A25;SLC25A29;SLC25A35;SLC25A5;SLC25A6;SLC44A1;SLMO1;SMCR7;SPG20;STOML2;SURF1;TAOK3;TAZ;TBRG4;TIMM10;TIMM13;TI  
1;COQ7;COQ9;COX411;CPSF2;CPSF3L;CPSF4;CPT1C;CREB3;CREB3L4;CRELD2;CTSC;CTSF;CTU2;CUEDC2;CYC1;CYP1B1;CYP2E1;DDX21;DDX28;DDX39A;DEAF1;DECR2;DERL3;DGCR6;DGCR6L;DGUOK;DHRS4;DIAPH2;DLGAP5;DI  
;P1;CLCN4;CLIP1;CLPP;CLSPN;CNTLN;COL11A2;COL6A1;COL6A2;COL9A2;COMMD5;COMTD1;COQ7;COQ9;CORO6;COX411;CPSF2;CPSF3L;CPSF4;CPT1C;CREB3;CREB3L4;CRELD2;CTSC;CTSF;CTTNBP2NL;CTU2;CUEDC2;CYC1;CY  
OO9;COX411;CPSF2;CPSF3L;CPSF4;CPT1C;CREB3;CREB3L4;CRELD2;CTSC;CTSF;CTU2;CUEDC2;CYC1;CYP1B1;CYP2E1;DDX21;DDX28;DDX39A;DEAF1;DECR2;DERL3;DGCR6;DGCR6L;DGUOK;DHRS4;DIAPH2;DLGAP5;DNAJC30;DI  
;CLIP1;CLPP;CLSPN;CNTLN;COL11A2;COL6A1;COL6A2;COL9A2;COMMD5;COMTD1;COQ7;COQ9;CORO6;COX411;CPSF2;CPSF3L;CPSF4;CPT1C;CREB3;CREB3L4;CRELD2;CTSC;CTSF;CTTNBP2NL;CTU2;CUEDC2;CYC1;CYP1B1;CYF

ETF8;ETV3;EXOSC5;FADS3;FAF2;FAM21B;FAM69B;FANCG;FBL;FBXO2;FBXW11;FDX1L;FDXR;FKBP2;FPGS;FSD1;GAS2L3;GCDH;GCHFR;GEMIN7;GFER;GGA1;GHDC;GIMAP5;GLTSCR2;GNAI3;GNB2L1;GOLPH3;GRIN3A;GTF2/  
V21B;FAM69B;FANCG;FBL;FBXW11;FDX1L;FDXR;FKBP2;FPGS;FSD1;GAS2L3;GCDH;GCHFR;GEMIN7;GFER;GGA1;GHDC;GIMAP5;GLTSCR2;GNAI3;GNB2L1;GOLPH3;GRIN3A;GTF2A1;GTF3C5;H2AF1;H2AFY2;HAUS8;HCSS;HD  
B7;NHP2;NLE1;NME4;NMRAL1;NOL12;NR2C2AP;NSRP1;NTHL1;NUDT1;NUP153;NUSAP1;OBFC1;OGG1;PAFAH1B2;PAOX;PARS2;PATL1;PDK4;PHF16;PHF20;PIN1;PIP5K1A;PNKP;POLD1;POLD4;POLR2F;POLR2G;POLR2I;POLR2L;POLR3K;POL

NSRP1;NTHL1;NUDT1;NUP153;NUSAP1;OBFC1;OGG1;PAFAH1B2;PAOX;PARS2;PATL1;PDK4;PHF16;PHF20;PIN1;PIP5K1A;PNKP;POLD1;POLD4;POLR2F;POLR2G;POLR2I;POLR2L;POLR3K;POLRMT;POP7;POU2F1;PPP2R3B;PSMA7;PSMB4;PS  
A2G6;PMM1;POLR2F;POLR2G;POLR2I;POLR2L;POMT1;PPM1D;PPM1J;PPM1L;PPP2R3B;PREB;PRKAR2A;PRMT7;PSMA7;PSMB4;PSMB5;PSMB7;PSMD9;PTPRC;PUS1;PUSL1;QPCTL;QTRT1;RABGGTA;RBBP5;RBPMS;RLIM;RNF115;RNF169;RNF1

PS15;MRPS18A;MTM1;MYLIP;MYLK3;NAA10;NCOA3;NDUFA13;NEURL2;NF1;NIPBL;NOG;NPRL2;NRP1;NSMCE1;OXSR1;P2RX7;PARP10;PARP3;PARS2;PDE6G;PKD4;PHEX;PHF16;PHF20;PHPT1;PICK1;PIGQ;PIK3CB;PIK3CG;PIN1;PL

NSRP1;NTHL1;NUDT1;NUP153;NUSAP1;OBFC1;OGG1;PAFAH1B2;PAOX;PARS2;PATL1;PDK4;PHF16;PHF20;PIN1;PIP5K1A;PNKP;POLD1;POLD4;POLR2F;POLR2G;POLR2I;POLR2L;POLR3K;POLRMT;POP7;POU2F1;PPP2R3B;PSMA7;PSMB4;PS  
;LAMB1;LAMTOR2;LARP4B;LAT;LATS1;LATS2;LIME1;LSM14A;LSM2;LSM4;MAD1L1;MAFK1;MBD3;MCM7;MCRS1;MED1;MED13;MED18;MICB;MLL3;MLL5;MR1;MRPL12;MRPL20;MRPL23;MRPL24;MRPL38;MRPL52;MR

20H1;TADA3;TAOK3;TAZ;TBRG4;TGM1;TIIPARP;TLK2;TNK1;TRIM24;TRMT1;TRMT112;TRMT2A;TRMT61A;TRMU;TRPT1;TSSK6;TTN;TUT1;UCK1;UCKL1;ULK3;WHSC111;ZAP70;ZC3HAV1;ZD

VB21;RABEPK;RHOT2;SCARB2;SEC22B;SEC24B;SENP2;SLC22A17;SLC25A19;SLC25A25;SLC25A29;SLC25A35;SLC25A5;SLC25A6;SLC26A11;SLC29A2;SLC2A8;SLC35B2;SLC35D2;SLC37A4;SLC39A13;SLC44A1;SLC50A1;SMCR7;SNF8;SNTB

;CCDC61;CCDC78;CHCHR1;CCNL2;CCS;CD320;CD36;CD38;CD7;CD8B;CD99;CDC25A;CDC6;CDCA8;CDK12;CDK13;CDS2;CDYL2;CECR5;CEL;CEL2;CEL6;CEMP1;CENPF;CENPM;CENPT;CEP55;CHCHD5;CHD7;CHMP4A;CHMP6;CHR  
;CCDC61;CCDC78;CHCHR1;CCNL2;CCS;CD320;CD36;CD38;CD7;CD8B;CD99;CDC25A;CDC6;CDCA8;CDK12;CDK13;CDS2;CDYL2;CECR5;CEL;CEL2;CEL6;CEMP1;CENPF;CENPM;CENPT;CEP55;CHCHD5;CHD7;CHMP4A;CHMP6;CHR

3D3;MCRS1;METAP1D;MIF4G4;MLL3;MLL5;MLST8;MMP28;MOGS;MPDU1;MRPL12;MRPL20;MRPL23;MRPL24;MRPL52;MRPL55;MRPS11;MRPS12;MRPS15;MRPS18A;MST1;MTM1;MYLIP;MYLK3;NAA10;NAALADL1;NAPSA;NCOA3;NDUF  
\*M1L;PPP2R3B;PREB;PRKAR2A;PRMT7;PSMA7;PSMB4;PSMB5;PSMB7;PSMD9;PTPRC;QPCTL;RABGGTA;RBBP5;RBPMS;RLIM;RNF115;RNF169;RNF181;RNF25;ROCK2;RSC1;RUSC1;SDHAF2;SEC24B;SENP2;SETD2;SETD7;SH3RF1;SIRT3;SPI  
\*M1L;PPP2R3B;PREB;PRKAR2A;PRMT7;PSMA7;PSMB4;PSMB5;PSMB7;PSMD9;PTPRC;QPCTL;RABGGTA;RBBP5;RBPMS;RLIM;RNF115;RNF169;RNF181;RNF25;ROCK2;RSC1;RUSC1;SDHAF2;SEC24B;SENP2;SETD2;SETD7;SH3RF1;SIRT3;SPI

SR1;SAP30L;SDHAF2;SENP2;SERGEF;SETX;SF3B5;SIVA1;SLC29A2;SNF8;SNRPC;SP1;SPTBN4;STRA13;SUDS3;SUV420H1;SWI5;SYCE1L;TADA3;TBL3;TCEA2;TCEB2;THAP7;TIMM50;TLE2;TOP1;TOP2A;TOPBP1;TP73;TPR;TRIM24  
L;EIF2B2;EIF2B4;EIF3F;EIF3G;EIF3I;EIF3K;EIF4G3;ELF1;ELK3;ELP4;EPC1;EPG5;ERCC1;ERLIN2;ERP29;ERP44;ETF1;ETF8;ETNK2;ETV2;ETV3;EXOSC5;FADS3;FANCG;FASTK;FBL;FBXL15;FBXL6;FBXO2;FBXO24;f  
43;DPP7;DPP8;DSE;DTD1;DTX3;DTYMK;DUSP10;DUSP2;DUSP3;DVL1;E2F1;E4F1;EAF1;ECI1;EDF1;EEF1D;EEF1G;EHHADH;EIF1;EIF2B2;EIF2B4;EIF3F;EIF3G;EIF3I;EIF3K;EIF4G3;ELF1;ELK3;ELP4;EPC1;EPG5;ERCC1  
17;PSMB4;PSMB5;PSMB7;PSMD9;PTGES2;QARS;RAC3;RANBP9;RGL1;RHOC;RHOT2;RNF115;RNF25;ROCK2;RPL13;RPL18;RPL18A;RPL28;RPL29;RPL38;RPL8;RPL1;RPL2;RPS15;RPS2;RPS28;RQC1;S100A13;SEC24B;SERPINB9;S

2S13B;VPS16;VPS41;VTI1A;WDR24;WNT7A;YIPF5;YWHAZ;ZFYVE27

3;DVL1;E2F1;E4F1;EAF1;EC1;EDF1;EEF1D;EEF1G;EHHADH;EIF1;EIF2B2;EIF2B4;EIF3F;EIF3G;EIF3I;EIF3K;EIF4G3;ELF1;ELK3;ELP4;EPC1;ERCC1;ERLIN2;ERP29;ERP44;ETF1;ETNK2;ETV2;ETV3;EXOSC5;FADS3;FANC

VED13L;MED18;MICB;MLL3;MLL5;MR1;MSH3;MYH10;MZT2B;NARFL;NAT9;NCAPH;NDUFA11;NDUFA13;NDUFA3;NDUFA8;NDUFB10;NDUFB11;NDUFB7;NDUFB8;NDUFB9;NDUFS6;NDUFS7;NDUFS8;NDUFV1;NEURL2;NIPBL;NIPBL;RAD21;RAD9A;RBBP5;REC8;RFK3;RLIM;RNF169;RPS15;RPS19BP1;RPS2;RPS6KB2;RRP9;RSF1;RSRC1;SAP30L;SDHAF2;SEN2;SERGEF;SETX;SF3B5;SIVA1;SLC29A2;SNF8;SNRNP25;SNRPC;SP1;SPTBN4;STOML2;STRA13;STUB1;SUDES

5MA6A;SERPINF2;SETD2;SETD7;SLC25A5;SLC25A6;SMCR7;SPG20;SPTBN4;STMN3;STOML2;STRA13;SUDES3;SUV420H1;SYCE1L;TACC1;TADA3;TAZ;TIMM10;TIMM13;TIMM50;TLK2;TMED9;TMSB4X;TOP1;TOP2A;TOR1AIP1;TP73;TP

KP;POLR2F;POLR2G;POLR2I;POLR2L;PPAP2C;PPM1D;PPM1J;PPM1L;PPP1R14A;PPP1R14B;PPP2R3B;PREB;PRKAR2A;PTDSS2;PTPRC;PXX;RAB21;RAB33A;RAC3;RALGAPB;RASA2;RBPMS;ROCK2;RSRC1;SDHAF2;SEN2;SLC44A1;SMAP1;SMPD2;SOIHADH;EIF1;EIF2B2;EIF2B4;EIF3F;EIF3G;EIF3I;EIF3K;EIF4G3;ELF1;ELK3;ELP4;EPC1;ERCC1;ERLIN2;ERP29;ERP44;ETF1;ETNK2;ETV2;ETV3;EXOSC5;FADS3;FANCG;FASTK;FBL;FBXL15;FBXL6;FBXO2;FBXO24;FBXO2L;PPAP2C;PPM1D;PPM1J;PPM1L;PPP1R14A;PPP1R14B;PPP2R3B;PREB;PRKAR2A;PTDSS2;PTPRC;PXX;RAB21;RAB33A;RAC3;RALGAPB;RASA2;RBPMS;ROCK2;RSRC1;SDHAF2;SEN2;SLC44A1;SMAP1;SMPD2;SOS1;SPHK2;SPRED2;SPTBN4;SS

8;PHKB;PHT1;PICK1;PLA2G6;PLCD1;PNKP;POLD1;POP7;PPAP2C;PPM1D;PPM1J;PPM1L;PPM1N;PPP2R3B;PPTC7;PRSS22;PRSS53;PSMA7;PSMB4;PSMB5;PSMB7;PTPRC;PTRH1;QPCTL;RAB21;RAB33A;RAC3;RAD9A;RECQL4;REXO1L1;RHBDD3;RHOT2;

9;PDE6G;PDK4;PEX6;PFKFB2;PHKG1;PIK3C3;PIK3CG;PIK5K1A;PIP5K1B;PIP5KL1;PMVK;PNKP;POLD1;PPOX;PRKAR2A;PYCRL;QARS;R3HCC1;RAB21;RAB25;RAB33A;RABEP2;RAC3;RBMXL1;RBPMS;RECQL4;RHOC;RHOT2;ROC

G;PIP5K1A;PIP5K1B;PIP5KL1;PMVK;PNKP;POLD1;PPOX;PRKAR2A;PYCRL;QARS;R3HCC1;RAB21;RAB25;RAB33A;RABEP2;RAC3;RBMXL1;RBPMS;RECQL4;RHOC;RHOT2;ROCK2;RPS6KB2;RPS6K1;RPS6KL1;RTEL1;SARS2;SDR39U1;SI

G;PIP5K1A;PIP5K1B;PIP5K1L;PMVK;PNKP;POLD1;PPOX;PRKAR2A;PYCRL;QARS;R3HCC1;RAB21;RAB25;RAB33A;RABEP2;RAC3;RBMXL1;RBPMS;RECQL4;RHOC;RHOT2;ROCK2;RPS6KB2;RPS6KC1;RPS6KL1;RTEL1;SARS2;SDR39U1;SI

PICK1;PIK3C3;PIK3CB;PIK3CG;PIN1;PIP5K1A;PIP5K1B;PLA2G6;PMM1;PMVK;PNKP;PNMT;PPAP2C;PPM1L;PPOX;PRKAR2A;PSMA7;PSMB4;PSMB5;PSMB7;PSMD9;PTDSS2;PTGES2;PTPLB;PXK;PYCRL;QARS;QTRT1;RAB21;RAB33A;RAC3;RALGAPB;RASA2;RGL1;S

IS;TOMM40L;TOR1AIP1;TPR;TRAF2;TRAF6;TRPS1;UBL4A;UEVLD;UPF2;USE1;VPS13B;VPS16;VPS41;VTI1A;WDR24;WNT7A;YIPF5;YWHAZ;ZFYVE2;

1D;EEF1G;EHHADH;EIF2B2;EIF2B4;EIF3F;EIF3G;EIF3I;EIF3K;ELF1;ELK3;ELMO3;ELP4;ERCC1;ERLIN2;ETF1;EXD3;EXOSC5;FAF2;FANCG;FASTK;FBL;FBXL15;FBXO2;FBXO44;FBXW11;FBXW5;FBXW9;FCGR3A;FCHSD2;FDXR;I

BP1;HDAC10;HDAC11;HERC3;HES6;HES7;HINFP;HIPK1;HIPK3;HIVEP2;HNRNP3;HPX;HRAS;ID3;IKZF4;IMP4;INO80E;IRAK4;IRF3;JAG2;JOSD2;KAT2A;KCNH4;KDM3A;KDM5A;KDM6A;KIDINS220;KLI

;NOXA1;NOXO1;NT5C;NTHL1;NUDT1;NUDT18;NUP153;OGG1;P2RX7;PAFAH1B2;PAFAH1B3;PANK4;PAOX;PAPSS1;PARS2;PCYT2;PDK4;PEMT;PEX6;PFKFB2;PGM2;PHK8;PHKG1;PICK1;PIGQ;PIK3C3;PIK3CB;PIK3CG;PIN1;PIP5K1A;PIP5K1B;PLA2G6;PLCD1;PMM1

CC1;THOC6;TIMM10;TIMM13;TIMM50;TLR7;TMED9;TMSB4X;TNFRSF4;TNFSF15;TOR1AIP1;TPR;TRAF2;TRAF6;TRAPPC2L;TRAPPC4;TRPS1;TTN;UBL4A;UPF2;USE1;USP6NL;VPS16;VPS41;VTI1A;WASH3P;WDR24;WNT7A;YIF

2;PARP3;PATL1;PBX4;PHF1;PLA2G6;PNKP;POLD1;POLR2F;POLRMT;POP7;PRKAR2A;PROCR;PUS1;PXK;QTRT1;RAC3;RAD21;RAD9A;RANBP9;RASSF7;RC3H1;REC8;RF3;RINL;RNF169;ROCK2;RPL13;RPL18;RPL18A;RPL28;RPL29;RPL38;RPL8;R  
2;PARP3;PATL1;PBX4;PHF1;PLA2G6;PNKP;POLD1;POLR2F;POLRMT;POP7;PRKAR2A;PROCR;PUS1;PXK;QTRT1;RAC3;RAD21;RAD9A;RANBP9;RASSF7;RC3H1;REC8;RF3;RINL;RNF169;ROCK2;RPL13;RPL18;RPL18A;RPL28;RPL29;RPL38;RPL8;R

.D1;FNIP2;GEMIN7;GFER;GLYCK;GNB2L1;GPBP1L1;GTF2A1;GTF2H2D;GTF3C5;GTPBP3;GYG1;GZMM;H2AFJ;H2AFY2;HBP1;HDAC10;HDAC11;HERC3;HES6;HES7;HINFP;HIPK1;HIPK3;HIVEP2;HNRNP3;HP



ASP1;CLCF1;CLCN4;CLDN7;CLIP1;CLPP;CLSPN;COL11A2;COL6A1;COL6A2;COMMD4;COMMD5;COQ7;CORO6;CPSF2;CPSF4;CRB3;CREB3;CREB3L4;CRELD1;CRELD2;CRIP1;CRIP2;CRYL1;CSDE1;CSNK1G1;CTSC;CTTNBP2NL;CTU2;CUE

;TUT1;UBA7;UCK1;UCKL1;ULK3;VAR2;YME1L1;ZA

1;UCKL1;ULK3;VARS2;YME1L1;ZA

AB33A;RABEP2;RAC3;RECCQL4;RHOC;RHOT2;ROCK2;RPL29;RPS6KB2;RPS6KC1;RPS6KL1;RTEL1;SARS2;SEPT1;SETX;SIRT3;SLC1A3;SOAT1;SOAT2;SPEG;SPHK2;STK25;STOML2;TAOK3;TLK2;TNK1;TOP1;TOP2A;TOP3B;TPR;

RS2;YME1L1;ZA

RS2;YME1L1;ZA

RS2;YME1L1;ZA

1;UCKL1;ULK3;VARS2;YME1L1;ZA

ME1L1;ZA

IIPK1;HIPK3;HIVEP2;HNRNPH3;HRAS;HSD11B1L;HSD17B1;HSD17B12;HSD17B8;JFT27;IKZF4;ILVBL;IRAK4;IRF3;ISYNA1;ITPA;KDM3A;KDM5A;KHK;KIAA2018;KIF15;KIF20A;KIF24;KIF7;KLF10;LAF  
2;HBP1;HDAC10;HDAC11;HELZ;HERC3;HES6;HES7;HEXDC;HINFP;HIPK1;HIPK3;HIVEP2;HNRNPH3;HRAS;ID3;IKZF4;IMP4;INO80E;IPO8;IRF3;ISOC2;KAT2A;KDM3A;KDM5A;KDM6A;KIAA2018;KIF20A;KLF10;KRT18;LAT;I

RS2;YME1L1;ZA

.MK2D;CAMK4;CAPG;CAPN7;CARD8;CASC5;CASP3;CASP8;CASP8AP2;CBFB;CBX3;CC2D1A;CCDC59;CCDC86;CCDC91;CCNA2;CCNC;CCND3;CCNE2;CCNG1;CCNH;CCNL1;CCNT2;CCNY;CCT2;CD2AP;CD2BP2;CDC14A;CDC25C;CDC  
3;ARL2;ARL4A;ARL6IP1;ARL6IP5;ARL8B;ARMC1;ARMC10;ARRB1;ARSA;ARSK;ARVCF;ASF1A;ASNA1;ASPH;ASPM;ASTL;ATAD1;ATAD2;ATAD3A;ATF1;ATF2;ATG5;ATG9A;ATL2;ATP10D;ATP11B;ATP11C;ATP13A2;ATP2C1;ATP5C1;ATP5E;ATP5F1;  
3;ARL2;ARL4A;ARL6IP1;ARL6IP5;ARL8B;ARMC1;ARMC10;ARRB1;ARSA;ARSK;ARVCF;ASF1A;ASNA1;ASPH;ASPM;ASTL;ATAD1;ATAD2;ATAD3A;ATF1;ATF2;ATG5;ATG9A;ATL2;ATP10D;ATP11B;ATP11C;ATP13A2;ATP2C1;ATP5C1;ATP5E;ATP5F1;  
IA;ARHGFE2;ARID2;ARID4A;ARID4B;ARID5A;ARID5B;ARL13B;ARL2;ARL4A;ARL6IP1;ARL6IP5;ARL8B;ARMC1;ARMC10;ARPC4;ARRB1;ARSA;ARSK;ARVCF;ASF1A;ASNA1;ASPH;ASPM;ASTL;ATAD1;ATAD2;ATAD3A;ATF1;ATF2;ATG5;ATG9A;ATL2;A  
IA;ARHGFE2;ARID2;ARID4A;ARID4B;ARID5A;ARID5B;ARL13B;ARL2;ARL4A;ARL6IP1;ARL6IP5;ARL8B;ARMC1;ARMC10;ARPC4;ARRB1;ARSA;ARSK;ARVCF;ASF1A;ASNA1;ASPH;ASPM;ASTL;ATAD1;ATAD2;ATAD3A;ATF1;ATF2;ATG5;ATG9A;ATL2;A  
D;APBP2;APPL1;APTX;AQP11;ARAF;ARAP2;ARF4;ARFGAP1;ARFGAP2;ARFGFE2;ARFIP1;ARG2;ARGLU1;ARHGAP10;ARHGAP11A;ARHGAP12;ARHGAP22;ARHGAP5;ARHGDI;ARHGFE10L;ARHGFE2;ARID2;ARID4A;ARID4B;ARID5A;ARID5B;ARL13B;ARI  
;ARHGAP12;ARHGAP22;ARHGAP5;ARHGDI;ARHGFE10L;ARHGFE2;ARID4B;ARL2;ARL4A;ARL6IP1;ARL6IP5;ARL8B;ARMC1;ARMC10;ARMCX5-GPRASP2;ARPC4;ARPP19;ARRB1;ARRC3;ARSA;ARSK;ARVCF;ASAP3;ASMTL;ASNA1;ASPH;ASPM;ASTL;ATAC  
D;APBP2;APPL1;APTX;AQP11;ARAF;ARAP2;ARF4;ARFGAP1;ARFGAP2;ARFGFE2;ARFIP1;ARG2;ARGLU1;ARHGAP10;ARHGAP11A;ARHGAP12;ARHGAP22;ARHGAP42;ARHGAP5;ARHGDI;ARHGFE10L;ARHGFE2;ARID2;ARID4A;ARID4B;ARID5A;ARID5B;A  
C;APEH;APEX1;APEX2;APH1A;API5;APIP;APLF;APOBEC3D;APBP2;APPL1;APTX;AQP11;ARAF;ARAP2;ARF4;ARFGAP1;ARFGAP2;ARFGFE2;ARFIP1;ARG2;ARGLU1;ARHGAP10;ARHGAP11A;ARHGAP12;ARHGAP22;ARHGAP42;ARHGAP5;ARHGDI;ARHGFE1C  
C;APEH;APEX1;APEX2;APH1A;API5;APIP;APLF;APOBEC3D;APBP2;APPL1;APTX;AQP11;ARAF;ARAP2;ARF4;ARFGAP1;ARFGAP2;ARFGFE2;ARFIP1;ARG2;ARGLU1;ARHGAP10;ARHGAP11A;ARHGAP12;ARHGAP22;ARHGAP42;ARHGAP5;ARHGDI;ARHGFE1C  
;ATG5;ATG9A;ATL2;ATP10D;ATP11B;ATP11C;ATP13A2;ATP2C1;ATP5C1;ATP5E;ATP5F1;ATP5I;ATP5L;ATP5O;ATP6AP1;ATP6V1G1;ATP7A;ATP8A1;ATPAF2;AUH;AZI1;AZI2;AZIN1;B2M;B3GALNT1;B3GALT2;B3GALT3;B3GNT1;B3GNT2;B3GNT5;  
16;BANF1;BAP1;BAZ1A;BBS7;BCAP29;BCAP31;BCAS2;BCAT2;BCKDHB;BCLAF1;BDP1;BET1;BLOC1S2;BLZF1;BMF;BMI1;BNIP1;BNIP2;BNIP3L;BRCA2;BRCC3;BRIP1;BRWD1;BTD;BUD13;BYSL;C10orf2;C12orf52;C14orf166;C14orf2;(t  
;CAMK2D;CAMK4;CAMLG;CARHSP1;CASC5;CASP3;CASP8;CASP8AP2;CBFB;CBLL1;CBX3;CCDC59;CCDC88A;CCNA2;CCNC;CCND3;CCNE2;CCNG1;CCNH;CCNL1;CCNT2;CCNY;CCNYL1;CCT2;CCT6B;CD28;CD28BP2;CD80;CD81;CDC25C;CDC26;CC  
16;BANF1;BAP1;BAZ1A;BBS7;BCAP29;BCAP31;BCAS2;BCAT2;BCKDHB;BCLAF1;BDP1;BET1;BLOC1S2;BLZF1;BMF;BMI1;BNIP1;BNIP2;BNIP3L;BRCA2;BRCC3;BRIP1;BRWD1;BTD;BUD13;BYSL;C10orf2;C12orf52;C14orf166;C14orf2;(t  
C1;ATP5C1;ATP5E;ATP5F1;ATP5I;ATP5L;ATP5O;ATP7A;ATPBD4;ATRX;ATXN7L3;AUH;AURKC;AZIN1;B2M;B3GALNT1;B3GALT2;B3GALT3;B3GNT1;B3GNT2;B3GNT5;B4GALT3;B4GALT6;BACH1;BAG2;BAG4;BAG6;BANF1;BAP1;BAZ1A;BAZ2B;B  
OP55;COP56;CPEB2;CPEB3;CRBN;CREB1;CREBL2;CRIPAK;CRK;CRY1;CSK;CSN1A1;CSNK1G3;CSNK2B;CSTA;CTBP1;CTDNEP1;CTDSP1;CUL2;CUL4B;CUL5;CXCC1;DAB2IP;DAPK3;DAPP1;DAXX;DCAF10;DCAF11;DCAF13;DDB2;DDOST;DDX11;D  
ATP2B1;ATP2C1;ATP5C1;ATP5E;ATP5F1;ATP5I;ATP5L;ATP5O;ATP7A;ATPBD4;ATRX;ATXN7L3;AUH;AURKC;AZIN1;B2M;B3GALNT1;B3GALT2;B3GALT3;B3GNT1;B3GNT2;B3GNT5;B4GALT3;B4GALT6;BACH1;BAG2;BAG4;BAG6;BANF1;BAP1;BAZ1  
2;BRCC3;BRD9;BRIP1;BRMS1;BRMS1L;BRWD1;BTAF1;BTBD1;BUD13;BZW1;C10orf2;C12orf52;C14orf166;C1GALT1;C1QA;C1QB;C1QC;C1R;CAB39;CALCR;CAMK1;CAMK2D;CAMK4;CAMLG;CAPN14;CAPN7;CARD17;CARHSP1;CASC5;CASP3;CASI  
2;ATG4A;ATG4B;ATG4C;ATG5;ATL2;ATP2B1;ATP2C1;ATP5C1;ATP5E;ATP5F1;ATP5I;ATP5L;ATP5O;ATP7A;ATPBD4;ATRX;ATXN7L3;AUH;AURKC;AZIN1;B2M;B3GALNT1;B3GALT2;B3GALT3;B3GNT1;B3GNT2;B3GNT5;B4GALT3;B4GALT6;BACH1;BA  
IGAP22;ARHGAP42;ARHGAP5;ARHGDI;ARHGFE2;ARID2;ARID4A;ARID4B;ARID5A;ARID5B;ARL13B;ARL15;ARL2;ARL4A;ARLSA;ARLSB;ARL6IP1;ARL6IP5;ARL8B;ARMC1;ARMCX5-GPRASP2;ARPC4;ARPP19;ARRB1;ARRC3;ARSA;ARSK;ARVCF;ASAP3;AS  
CR8;DIS3;DMAP1;DMPK;DNA2;DNAJB9;DNTTIP2;DPY30;DR1;DTX2;DYRK1A;E2F4;E2F6;E2F7;EAF2;EED;EIF3E;EIF5A2;EIF6;ELL2;ENY2;EPC2;ERBB2IP;ERCC2;ERCC8;ERI1;ERN1;ESF1;ESR2;FAM169A;FAM175A;FAM188A;FAM  
;TAD2;ATF1;ATF2;ATG12;ATG16L2;ATG4A;ATG4B;ATG4C;ATG5;ATG9A;ATL2;ATP2B1;ATP2C1;ATP5C1;ATP5E;ATP5F1;ATP5I;ATP5L;ATP5O;ATP7A;ATPBD4;ATRX;ATXN7L3;AUH;AURKC;AZIN1;B2M;B3GALNT1;B3GALT2;B3GALT3;B3GNT1;B3GNT

NFXL1,NPLOC4,NR1D2,NR1H2,NR3C1,NR4A1,NR4A3,NSMCE2,P2RX4,PAN3,PARK2,PCGF5,PCGF6,PCDC2,PDLM2,PDLM5,PDXX,PEX12,PEX2,PHC3,PHF17,PHF20L1,PHF6,PHF7,PIA54,PIA2,PLAG1,PLAGL1,PNKD,PNMA3,POLR2K,PRDM10,PRDM5,F  
V,CORO7,COX16,COX6C,COX7A2,COX7B,COX7C,CRA7,CRSL1,CSGALNACT1,CSGALNACT2,CS73,CTDNBP1,CTNS,CYBA,CYBASC3,CYCS,CYP251,CYP2U1,CYP2W1,CYP4F22,DDOST,DDX3X,DEGS1,DEGS2,DENNDC4,DERL1,I  
USP38,USP44,USP45,USP46,USP5,USP51,USP53,USP6,USPL1,WFS1,WWP1,YOD1,ZMPSTE24,ZNRFF1,ZRA  
SP16,USP19,USP21,USP25,USP31,USP37,USP38,USP44,USP45,USP46,USP5,USP51,USP53,USP6,USPL1,WFS1,WWP1,YOD1,ZMPSTE24,ZNRFF1,ZRA  
IX54,DECR1,DEPDC1,DGCR8,DHFR1L,DHX30,DIS3,DLAT,DMAP1,DNA2,DNAJB9,DNAJC10,DNTTIP2,DPY30,DR1,DYRK1A,E2F4,E2F6,E2F7,EAF2,ECHS1,EDEM3,EED,EIF3E,EIF6,ELL2,ENY2,EPC2,ERAL1,ERCC2,ERCC8,ERL1,ERLECI  
J5P44,USP45,USP46,USP5,USP51,USP53,USP6,USPL1,WFS1,WWP1,YOD1,ZNRFF1,ZRA  
SEH2A,RNF103,RNF111,RNF144B,RNF146,RNF187,RNF217,RNF40,RNF6,RNH1,RPL11,RPL15,RPL17,RPL23,RPL26,RPL26L1,RPL27,RPL30,RPL31,RPL34,RPL35,RPL36A,RPL39,RPL41,RPL7,RPL9,RPS15A,RPS24,RPS27,RPS29,RPS3A,RPS7,S1  
USP38,USP44,USP45,USP46,USP5,USP51,USP53,USP6,USPL1,WFS1,WWP1,YOD1,ZMPSTE24,ZNRFF1,ZRA  
L1,DDX3X,DDX50,DDX54,DECR1,DEPDC1,DGCR8,DHFR1L,DHX30,DIS3,DLAT,DMAP1,DNA2,DNAJB9,DNAJC10,DNTTIP2,DPY30,DR1,DYRK1A,E2F4,E2F6,E2F7,EAF2,ECHS1,EDEM3,EED,EIF3E,EIF6,ELL2,ENY2,EPC2,ERAL1,ERCC2,EI  
6,RNF187,RNF19A,RNF2,RNF217,RNF220,RNF31,RNF40,RNF6,RNF7,RYBP,SEN1,SEN6,SIAM1,SIRT1,SKP2,SMURF2,SOC5A,SOC5S,SOC56,SPOPL,SUMO1,SUMO2,SUMO3,SUZ12,TGFBR1,TICAM1,TKNS2,TOLLIP,TOPORS,TRAF7,TRIM13,TR  
ISP14,USP15,USP16,USP19,USP21,USP25,USP31,USP37,USP38,USP44,USP45,USP46,USP5,USP51,USP53,USP6,USPL1,WFS1,WWP1,YOD1,ZMPSTE24,ZNRFF1,ZRA  
DCLRE1A,DDB2,DDX11,DDX3X,DDX50,DDX54,DECR1,DEPDC1,DGCR8,DHFR1L,DHX30,DIS3,DLAT,DMAP1,DNA2,DNAJB9,DNAJC10,DNTTIP2,DPY30,DR1,DYRK1A,E2F4,E2F6,E2F7,EAF2,ECHS1,EDEM3,EED,EIF3E,EIF6,ELL2,ENY2,EI  
5,FBXW7,FER,FGFR1OP,FIGNL1,GAK,GAS2,GAS2L2,GAS6,GMNN,GNAI1,GORASP1,GPR132,GPS1,GPS2,GTTF2H1,HACE1,HAUS1,HAUS3,HAUS6,HAUS7,HDAC3,HDAC8,HELLS,HORMAD1,HPGD,HSF1,IL12A,IL8,ILK,ITGB3BP,IMYJUN,KAT2  
.CTDSP1,CUL2,CUL4B,CUL5,CXXC1,DAB2IP,DAPK3,DAPP1,DAXX,DCAF10,DCAF11,DCAF13,DDB2,DDOST,DDX11,DHPS,DLG1,DMAP1,DMPK,DNAJB2,DNAJB9,DNAJC10,DOHH,DOLPP1,DOT1L,DPH3,DPM1,DPY30,DR1,DTX2,DUSP11,DUSP19,DYI  
;BD2P1,CUL2,CUL4B,CUL5,CXXC1,DAB2IP,DAPK3,DAPP1,DAXX,DCAF10,DCAF11,DCAF13,DDB2,DDOST,DDX11,DHPS,DLG1,DMAP1,DMPK,DNAJB2,DNAJB9,DNAJC10,DOHH,DOLPP1,DOT1L,DPH3,DPM1,DPY30,DR1,DTX2,DUSP11,DUSP19,DYI  
;CASP2,BBS10,BBS12,BCR,BGALAP,BIRC2,BIRC3,BMI1,BMP1,BMP1A,BMPR2,BNIP2,BNIP3,DRIP1,C1orf27,C11orf54,C1GALT1,C1orf27,C1R,C4orf21,CA12,CA5BP1,CACNA1H,CALB1,CALML4,CALML6,CALU,CAMK1,CAMK2D,CAMK4,CY  
;FER,FMR1,FOXH1,FOXN2,FTG1,FXR1,FYTTD1,G2E3,GALPA,GATAD2A,GEMIN2,GEMIN6,GMLC1,GMNN,GNL3,GORAB,GP52,GRHL1,GRWD1,GTB2,GTZF21,GTZF22,GTZF23,GTZF2H1,GTZF2H4,GTPPB10,GZF1,HAT1,HAUS7,HDAC3,HC  
;CSNK1B,CSNK2B,CSTA,CSTB,CTDPNE1,CTDSP1,CUL2,CUL4B,CUL5,CXXC1,DAB2IP,DAPK3,DAPP1,DAXX,DCAF10,DCAF11,DCAF13,DDB2,DDOST,DDX11,DHPS,DLG1,DMAP1,DMPK,DNAJB2,DNAJB9,DNAJC10,DOHH,DOLPP1,DOT1L,DPH3,DPM  
77,COX19,CNPK3,CRK,CSK,CBNK1A1,CSNK2B,CTBP1,CTSH,CUL2,CUL5,CYCS,DAK,DAPP1,DAXX,DCP1A,DCP2,DCAF10,DCP5,DCNT2,DCTNA,DCTNB,DDX3X,DENNDB8,DENNDB9,DENNDB10,DENNDB11,DENNDB12,DENNDB13,DENNDB14,DENNDB15,DENNDB16,DENNDB17,DENNDB18,DENNDB19,DENNDB20,DENNDB21,DENNDB22,DENNDB23,DENNDB24,DENNDB25,DENNDB26,DENNDB27,DENNDB28,DENNDB29,DENNDB30,DENNDB31,DENNDB32,DENNDB33,DENNDB34,DENNDB35,DENNDB36,DENNDB37,DENNDB38,DENNDB39,DENNDB40,DENNDB41,DENNDB42,DENNDB43,DENNDB44,DENNDB45,DENNDB46,DENNDB47,DENNDB48,DENNDB49,DENNDB50,DENNDB51,DENNDB52,DENNDB53,DENNDB54,DENNDB55,DENNDB56,DENNDB57,DENNDB58,DENNDB59,DENNDB60,DENNDB61,DENNDB62,DENNDB63,DENNDB64,DENNDB65,DENNDB66,DENNDB67,DENNDB68,DENNDB69,DENNDB70,DENNDB71,DENNDB72,DENNDB73,DENNDB74,DENNDB75,DENNDB76,DENNDB77,DENNDB78,DENNDB79,DENNDB80,DENNDB81,DENNDB82,DENNDB83,DENNDB84,DENNDB85,DENNDB86,DENNDB87,DENNDB88,DENNDB89,DENNDB90,DENNDB91,DENNDB92,DENNDB93,DENNDB94,DENNDB95,DENNDB96,DENNDB97,DENNDB98,DENNDB99,DENNDB100,DENNDB101,DENNDB102,DENNDB103,DENNDB104,DENNDB105,DENNDB106,DENNDB107,DENNDB108,DENNDB109,DENNDB110,DENNDB111,DENNDB112,DENNDB113,DENNDB114,DENNDB115,DENNDB116,DENNDB117,DENNDB118,DENNDB119,DENNDB120,DENNDB121,DENNDB122,DENNDB123,DENNDB124,DENNDB125,DENNDB126,DENNDB127,DENNDB128,DENNDB129,DENNDB130,DENNDB131,DENNDB132,DENNDB133,DENNDB134,DENNDB135,DENNDB136,DENNDB137,DENNDB138,DENNDB139,DENNDB140,DENNDB141,DENNDB142,DENNDB143,DENNDB144,DENNDB145,DENNDB146,DENNDB147,DENNDB148,DENNDB149,DENNDB150,DENNDB151,DENNDB152,DENNDB153,DENNDB154,DENNDB155,DENNDB156,DENNDB157,DENNDB158,DENNDB159,DENNDB160,DENNDB161,DENNDB162,DENNDB163,DENNDB164,DENNDB165,DENNDB166,DENNDB167,DENNDB168,DENNDB169,DENNDB170,DENNDB171,DENNDB172,DENNDB173,DENNDB174,DENNDB175,DENNDB176,DENNDB177,DENNDB178,DENNDB179,DENNDB180,DENNDB181,DENNDB182,DENNDB183,DENNDB184,DENNDB185,DENNDB186,DENNDB187,DENNDB188,DENNDB189,DENNDB190,DENNDB191,DENNDB192,DENNDB193,DENNDB194,DENNDB195,DENNDB196,DENNDB197,DENNDB198,DENNDB199,DENNDB200,DENNDB201,DENNDB202,DENNDB203,DENNDB204,DENNDB205,DENNDB206,DENNDB207,DENNDB208,DENNDB209,DENNDB210,DENNDB211,DENNDB212,DENNDB213,DENNDB214,DENNDB215,DENNDB216,DENNDB217,DENNDB218,DENNDB219,DENNDB220,DENNDB221,DENNDB222,DENNDB223,DENNDB224,DENNDB225,DENNDB226,DENNDB227,DENNDB228,DENNDB229,DENNDB230,DENNDB231,DENNDB232,DENNDB233,DENNDB234,DENNDB235,DENNDB236,DENNDB237,DENNDB238,DENNDB239,DENNDB240,DENNDB241,DENNDB242,DENNDB243,DENNDB244,DENNDB245,DENNDB246,DENNDB247,DENNDB248,DENNDB249,DENNDB250,DENNDB251,DENNDB252,DENNDB253,DENNDB254,DENNDB255,DENNDB256,DENNDB257,DENNDB258,DENNDB259,DENNDB260,DENNDB261,DENNDB262,DENNDB263,DENNDB264,DENNDB265,DENNDB266,DENNDB267,DENNDB268,DENNDB269,DENNDB270,DENNDB271,DENNDB272,DENNDB273,DENNDB274,DENNDB275,DENNDB276,DENNDB277,DENNDB278,DENNDB279,DENNDB280,DENNDB281,DENNDB282,DENNDB283,DENNDB284,DENNDB285,DENNDB286,DENNDB287,DENNDB288,DENNDB289,DENNDB290,DENNDB291,DENNDB292,DENNDB293,DENNDB294,DENNDB295,DENNDB296,DENNDB297,DENNDB298,DENNDB299,DENNDB300,DENNDB301,DENNDB302,DENNDB303,DENNDB304,DENNDB305,DENNDB306,DENNDB307,DENNDB308,DENNDB309,DENNDB310,DENNDB311,DENNDB312,DENNDB313,DENNDB314,DENNDB315,DENNDB316,DENNDB317,DENNDB318,DENNDB319,DENNDB320,DENNDB321,DENNDB322,DENNDB323,DENNDB324,DENNDB325,DENNDB326,DENNDB327,DENNDB328,DENNDB329,DENNDB330,DENNDB331,DENNDB332,DENNDB333,DENNDB334,DENNDB335,DENNDB336,DENNDB337,DENNDB338,DENNDB339,DENNDB340,DENNDB341,DENNDB342,DENNDB343,DENNDB344,DENNDB345,DENNDB346,DENNDB347,DENNDB348,DENNDB349,DENNDB350,DENNDB351,DENNDB352,DENNDB353,DENNDB354,DENNDB355,DENNDB356,DENNDB357,DENNDB358,DENNDB359,DENNDB360,DENNDB361,DENNDB362,DENNDB363,DENNDB364,DENNDB365,DENNDB366,DENNDB367,DENNDB368,DENNDB369,DENNDB370,DENNDB371,DENNDB372,DENNDB373,DENNDB374,DENNDB375,DENNDB376,DENNDB377,DENNDB378,DENNDB379,DENNDB380,DENNDB381,DENNDB382,DENNDB383,DENNDB384,DENNDB385,DENNDB386,DENNDB387,DENNDB388,DENNDB389,DENNDB390,DENNDB391,DENNDB392,DENNDB393,DENNDB394,DENNDB395,DENNDB396,DENNDB397,DENNDB398,DENNDB399,DENNDB400,DENNDB401,DENNDB402,DENNDB403,DENNDB404,DENNDB405,DENNDB406,DENNDB407,DENNDB408,DENNDB409,DENNDB410,DENNDB411,DENNDB412,DENNDB413,DENNDB414,DENNDB415,DENNDB416,DENNDB417,DENNDB418,DENNDB419,DENNDB420,DENNDB421,DENNDB422,DENNDB423,DENNDB424,DENNDB425,DENNDB426,DENNDB427,DENNDB428,DENNDB429,DENNDB430,DENNDB431,DENNDB432,DENNDB433,DENNDB434,DENNDB435,DENNDB436,DENNDB437,DENNDB438,DENNDB439,DENNDB440,DENNDB441,DENNDB442,DENNDB443,DENNDB444,DENNDB445,DENNDB446,DENNDB447,DENNDB448,DENNDB449,DENNDB450,DENNDB451,DENNDB452,DENNDB453,DENNDB454,DENNDB455,DENNDB456,DENNDB457,DENNDB458,DENNDB459,DENNDB460,DENNDB461,DENNDB462,DENNDB463,DENNDB464,DENNDB465,DENNDB466,DENNDB467,DENNDB468,DENNDB469,DENNDB470,DENNDB471,DENNDB472,DENNDB473,DENNDB474,DENNDB475,DENNDB476,DENNDB477,DENNDB478,DENNDB479,DENNDB480,DENNDB481,DENNDB482,DENNDB483,DENNDB484,DENNDB485,DENNDB486,DENNDB487,DENNDB488,DENNDB489,DENNDB490,DENNDB491,DENNDB492,DENNDB493,DENNDB494,DENNDB495,DENNDB496,DENNDB497,DENNDB498,DENNDB499,DENNDB500,DENNDB501,DENNDB502,DENNDB503,DENNDB504,DENNDB505,DENNDB506,DENNDB507,DENNDB508,DENNDB509,DENNDB510,DENNDB511,DENNDB512,DENNDB513,DENNDB514,DENNDB515,DENNDB516,DENNDB517,DENNDB518,DENNDB519,DENNDB520,DENNDB521,DENNDB522,DENNDB523,DENNDB524,DENNDB525,DENNDB526,DENNDB527,DENNDB528,DENNDB529,DENNDB530,DENNDB531,DENNDB532,DENNDB533,DENNDB534,DENNDB535,DENNDB536,DENNDB537,DENNDB538,DENNDB539,DENNDB540,DENNDB541,DENNDB542,DENNDB543,DENNDB544,DENNDB545,DENNDB546,DENNDB547,DENNDB548,DENNDB549,DENNDB550,DENNDB551,DENNDB552,DENNDB553,DENNDB554,DENNDB555,DENNDB556,DENNDB557,DENNDB558,DENNDB559,DENNDB560,DENNDB561,DENNDB562,DENNDB563,DENNDB564,DENNDB565,DENNDB566,DENNDB567,DENNDB568,DENNDB569,DENNDB570,DENNDB571,DENNDB572,DENNDB573,DENNDB574,DENNDB575,DENNDB576,DENNDB577,DENNDB578,DENNDB579,DENNDB580,DENNDB581,DENNDB582,DENNDB583,DENNDB584,DENNDB585,DENNDB586,DENNDB587,DENNDB588,DENNDB589,DENNDB590,DENNDB591,DENNDB592,DENNDB593,DENNDB594,DENNDB595,DENNDB596,DENNDB597,DENNDB598,DENNDB599,DENNDB600,DENNDB601,DENNDB602,DENNDB603,DENNDB604,DENNDB605,DENNDB606,DENNDB607,DENNDB608,DENNDB609,DENNDB610,DENNDB611,DENNDB612,DENNDB613,DENNDB614,DENNDB615,DENNDB616,DENNDB617,DENNDB618,DENNDB619,DENNDB620,DENNDB621,DENNDB622,DENNDB623,DENNDB624,DENNDB625,DENNDB626,DENNDB627,DENNDB628,DENNDB629,DENNDB630,DENNDB631,DENNDB632,DENNDB633,DENNDB634,DENNDB635,DENNDB636,DENNDB637,DENNDB638,DENNDB639,DENNDB640,DENNDB641,DENNDB642,DENNDB643,DENNDB644,DENNDB645,DENNDB646,DENNDB647,DENNDB648,DENNDB649,DENNDB650,DENNDB651,DENNDB652,DENNDB653,DENNDB654,DENNDB655,DENNDB656,DENNDB657,DENNDB658,DENNDB659,DENNDB660,DENNDB661,DENNDB662,DENNDB663,DENNDB664,DENNDB665,DENNDB666,DENNDB667,DENNDB668,DENNDB669,DENNDB670,DENNDB671,DENNDB672,DENNDB673,DENNDB674,DENNDB675,DENNDB676,DENNDB677,DENNDB678,DENNDB679,DENNDB680,DENNDB681,DENNDB682,DENNDB683,DENNDB684,DENNDB685,DENNDB686,DENNDB687,DENNDB688,DENNDB689,DENNDB690,DENNDB691,DENNDB692,DENNDB693,DENNDB694,DENNDB695,DENNDB696,DENNDB697,DENNDB698,DENNDB699,DENNDB700,DENNDB701,DENNDB702,DENNDB703,DENNDB704,DENNDB705,DENNDB706,DENNDB707,DENNDB708,DENNDB709,DENNDB710,DENNDB711,DENNDB712,DENNDB713,DENNDB714,DENNDB715,DENNDB716,DENNDB717,DENNDB718,DENNDB719,DENNDB720,DENNDB721,DENNDB722,DENNDB723,DENNDB724,DENNDB725,DENNDB726,DENNDB727,DENNDB728,DENNDB729,DENNDB730,DENNDB731,DENNDB732,DENNDB733,DENNDB734,DENNDB735,DENNDB736,DENNDB737,DENNDB738,DENNDB739,DENNDB740,DENNDB741,DENNDB742,DENNDB743,DENNDB744,DENNDB745,DENNDB746,DENNDB747,DENNDB748,DENNDB749,DENNDB750,DENNDB751,DENNDB752,DENNDB753,DENNDB754,DENNDB755,DENNDB756,DENNDB757,DENNDB758,DENNDB759,DENNDB760,DENNDB761,DENNDB762,DENNDB763,DENNDB764,DENNDB765,DENNDB766,DENNDB767,DENNDB768,DENNDB769,DENNDB770,DENNDB771,DENNDB772,DENNDB773,DENNDB774,DENNDB775,DENNDB776,DENNDB777,DENNDB778,DENNDB779,DENNDB780,DENNDB781,DENNDB782,DENNDB783,DENNDB784,DENNDB785,DENNDB786,DENNDB787,DENNDB788,DENNDB789,DENNDB790,DENNDB791,DENNDB792,DENNDB793,DENNDB794,DENNDB795,DENNDB796,DENNDB797,DENNDB798,DENNDB799,DENNDB800,DENNDB801,DENNDB802,DENNDB803,DENNDB804,DENNDB805,DENNDB806,DENNDB807,DENNDB808,DENNDB809,DENNDB810,DENNDB811,DENNDB812,DENNDB813,DENNDB814,DENNDB815,DENNDB816,DENNDB817,DENNDB818,DENNDB819,DENNDB820,DENNDB821,DENNDB822,DENNDB823,DENNDB824,DENNDB825,DENNDB826,DENNDB827,DENNDB828,DENNDB829,DENNDB830,DENNDB831,DENNDB832,DENNDB833,DENNDB834,DENNDB835,DENNDB836,DENNDB837,DENNDB838,DENNDB839,DENNDB840,DENNDB841,DENNDB842,DENNDB843,DENNDB844,DENNDB845,DENNDB846,DENNDB847,DENNDB848,DENNDB849,DENNDB850,DENNDB851,DENNDB852,DENNDB853,DENNDB854,DENNDB855,DENNDB856,DENNDB857,DENNDB858,DENNDB859,DENNDB860,DENNDB861,DENNDB862,DENNDB863,DENNDB864,DENNDB865,DENNDB866,DENNDB867,DENNDB868,DENNDB869,DENNDB870,DENNDB871,DENNDB872,DENNDB873,DENNDB874,DENNDB875,DENNDB876,DENNDB877,DENNDB878,DENNDB879,DENNDB880,DENNDB881,DENNDB882,DENNDB883,DENNDB884,DENNDB885,DENNDB886,DENNDB887,DENNDB888,DENNDB889,DENNDB890,DENNDB891,DENNDB892,DENNDB893,DENNDB894,DENNDB895,DENNDB896,DENNDB897,DENNDB898,DENNDB899,DENNDB900,DENNDB901,DENNDB902,DENNDB903,DENNDB904,DENNDB905,DENNDB906,DENNDB907,DENNDB908,DENNDB909,DENNDB910,DENNDB911,DENNDB912,DENNDB913,DENNDB914,DENNDB915,DENNDB916,DENNDB917,DENNDB918,DENNDB919,DENNDB920,DENNDB921,DENNDB922,DENNDB923,DENNDB924,DENNDB925,DENNDB926,DENNDB927,DENNDB928,DENNDB929,DENNDB930,DENNDB931,DENNDB932,DENNDB933,DENNDB934,DENNDB935,DENNDB936,DENNDB937,DENNDB938,DENNDB939,DENNDB940,DENNDB941,DENNDB942,DENNDB943,DENNDB944,DENNDB945,DENNDB946,DENNDB947,DENNDB948,DENNDB949,DENNDB950,DENNDB951,DENNDB952,DENNDB953,DENNDB954,DENNDB955,DENNDB956,DENNDB957,DENNDB958,DENNDB959,DENNDB960,DENNDB961,DENNDB962,DENNDB963,DENNDB964,DENNDB965,DENNDB966,DENNDB967,DENNDB968,DENNDB969,DENNDB970,DENNDB971,DENNDB972,DENNDB973,DENNDB974,DENNDB975,DENNDB976,DENNDB977,DENNDB978,DENNDB979,DENNDB980,DENNDB981,DENNDB982,DENNDB983,DENNDB984,DENNDB985,DENNDB986,DENNDB987,DENNDB988,DENNDB989,DENNDB990,DENNDB991,DENNDB992,DENNDB993,DENNDB994,DENNDB995,DENNDB996,DENNDB997,DENNDB998,DENNDB999,DENNDB1000,DENNDB1001,DENNDB1002,DENNDB1003,DENNDB1004,DENNDB1005,DENNDB1006,DENNDB1007,DENNDB1008,DENNDB1009,DENNDB1010,DENNDB1011,DENNDB1012,DENNDB1013,DENNDB1014,DENNDB1015,DENNDB1016,DENNDB1017,DENNDB1018,DENNDB1019,DENNDB1020,DENNDB1021,DENNDB1022,DENNDB1023,DENNDB1024,DENNDB1025,DENNDB1026,DENNDB1027,DENNDB1028,DENNDB1029,DENNDB1030,DENNDB1031,DENNDB1032,DENNDB1033,DENNDB1034,DENNDB1035,DENNDB1036,DENNDB1037,DENNDB1038,DENNDB1039,DENNDB1040,DENNDB1041,DENNDB1042,DENNDB1043,DENNDB1044,DENNDB1045,DENNDB1046,DENNDB1047,DENNDB1048,DENNDB1049,DENNDB1050,DENNDB1051,DENNDB1052,DENNDB1053,DENNDB1054,DENNDB1055,DENNDB1056,DENNDB1057,DENNDB1058,DENNDB1059,DENNDB1060,DENNDB1061,DENNDB1062,DENNDB1063,DENNDB1064,DENNDB1065,DENNDB1066,DENNDB1067,DENNDB1068,DENNDB1069,DENNDB1070,DENNDB1071,DENNDB1072,DENNDB1073,DENNDB1074,DENNDB1075,DENNDB1076,DENNDB1077,DENNDB1078,DENNDB1079,DENNDB1080,DENNDB1081,DENNDB1082,DENNDB1083,DENNDB1084,DENNDB1085,DENNDB1086,DENNDB1087,DENNDB1088,DENNDB1089,DENNDB1090,DENNDB1091,DENNDB1092,DENNDB1093,DENNDB1094,DENNDB1095,DENNDB1096,DENNDB1097,DENNDB1098,DENNDB1099,DENNDB1100,DENNDB1101,DENNDB1102,DENNDB1103,DENNDB1104,DENNDB1105,DENNDB1106,DENNDB1107,DENNDB1108,DENNDB1109,DENNDB1110,DENNDB1111,DENNDB1112,DENNDB1113,DENNDB1114,DENNDB1115,DENNDB1116,DENNDB1117,DENNDB1118,DENNDB1119,DENNDB1120,DENNDB1121,DENNDB1122,DENNDB1123,DENNDB1124,DENNDB1125,DENNDB1126,DENNDB1127,DENNDB1128,DENNDB1129,DENNDB1130,DENNDB1131,DENNDB1132,DENNDB1133,DENNDB1134,DENNDB1135,DENNDB1136,DENNDB1137,DENNDB1138,DENNDB1139,DENNDB1140,DENNDB1141,DENNDB1142,DENNDB1143,DENNDB1144,DENNDB1145,DENNDB1146,DENNDB1147,DENNDB1148,DENNDB1149,DENNDB1150,DENNDB1151,DENNDB1152,DENNDB1153,DENNDB1154,DENNDB1155,DENNDB1156,DENNDB1157,DENNDB1158,DENNDB1159,DENNDB1160,DENNDB1161,DENNDB1162,DENNDB1163,DENNDB1164,DENNDB1165,DENNDB1166,DENNDB1167,DENNDB1168,DENNDB1169,DENNDB1170,DENNDB1171,DENNDB1172,DENNDB1173,DENNDB1174,DENNDB1175,DENNDB1176,DENNDB1177,DENNDB1178,DENNDB1179,DENNDB1180,DENNDB1181,DENNDB1182,DENNDB1183,DENNDB1184,DENNDB1185,DENNDB1186,DENNDB1187,DENNDB1188,DENNDB1189,DENNDB1190,DENNDB1191,DENNDB1192,DENNDB1193,DENNDB1194,DENNDB1195,DENNDB1196,DENNDB1197,DENNDB1198,DENNDB1199,DENNDB1200,DENNDB1201,DENNDB1202,DENNDB1203,DENNDB1204,DENNDB1205,DENNDB1206,DENNDB1207,DENNDB1208,DENNDB1209,DENNDB1210,DENNDB1211,DENNDB1212,DENNDB1213,DENNDB1214,DENNDB1215,DENNDB1216,DENNDB1217,DENNDB1218,DENNDB1219,DENNDB1220,DENNDB1221,DENNDB1222,DENNDB1223,DENNDB1224,DENNDB1225,DENNDB1226,DENNDB1227,DENNDB1228,DENNDB1229,DENNDB1230,DENNDB1231,DENNDB1232,DENNDB1233,DENNDB1234,DENNDB1235,DENNDB1236,DENNDB1237,DENNDB1238,DENNDB1239,DENNDB1240,DENNDB1241,DENNDB1242,DENNDB1243,DENNDB1244,DENNDB1245,DENNDB1246,DENNDB1247,DENNDB1248,DENNDB1249,DENNDB1250,DENNDB1251,DENNDB1252,DENNDB1253,DENNDB1254,DENNDB1255,DENNDB1256,DENNDB1257,DENNDB1258,DENNDB1259,DENNDB1260,DENNDB1261,DENNDB1262,DENNDB1263,DENNDB1264,DENNDB1265,DENNDB1266,DENNDB1267,DENNDB1268,DENNDB1269,DENNDB1270,DENNDB1271,DENNDB1272,DENNDB1273,DENNDB1274,DENNDB1275,DENNDB1276,DENNDB1277,DENNDB1278,DENNDB1279,DENNDB1280,DENNDB1281,DENNDB1282,DENNDB1283,DENNDB1284,DENNDB1285,DENNDB1286,DENNDB1287,DENNDB1288,DENNDB1289,DENNDB1290,DENNDB1291,DENNDB1292,DENNDB1293,DENNDB1294,DENNDB1295,DENNDB1296,DENNDB1297,DENNDB1298,DENNDB1299,DENNDB1300,DENNDB1301,DENNDB1302,DENNDB1303,DENNDB1304,DENNDB1305,DENNDB1306,DENNDB1307,DENNDB1308,DENNDB1309,DENNDB1310,DENNDB1311,DENNDB1312,DENNDB1313,DENNDB1314,DENNDB1315,DENNDB1316,DENNDB1317,DENNDB1318,DENNDB1319,DENNDB1320,DENNDB1321,DENNDB1322,DENNDB1323,DENNDB1324,DENNDB1325,DENNDB1326,DENNDB1327,DENNDB1328,DENNDB1329,DENNDB1330,DENNDB1331,DENNDB1332,DENNDB1333,DENNDB1334,DENNDB1335,DENNDB1336,DENNDB1337,DENNDB1338,DENNDB1339,DENNDB1340,DENNDB1341,DENNDB1342,DENNDB1343,DENNDB1344,DENNDB1345,DENNDB1346,DENNDB1347,DENNDB1348,DENNDB1349,DENNDB1350,DENNDB1351,DENNDB1352,DENNDB1353,DENNDB1354,DENNDB1355,DENNDB1356,DENNDB1357,DENNDB1358,DENNDB1359,DENNDB1360,DENNDB1361,DENNDB1362,DENNDB1363,DENNDB1364,DENNDB1365,DENNDB1366,DENNDB1367,DENNDB1368,DENNDB1369,DENNDB1370,DENNDB1371,DENNDB1372,DENNDB1373,DENNDB1374,DENNDB1375,DENNDB1376,DENNDB1377,DENNDB1378,DENNDB1379,DENNDB1380,DENNDB1381,DENNDB1382,DENNDB1383,DENNDB1384,DENNDB1385,DENNDB1386,DENNDB1387,DENNDB1388,DENNDB1389,DENNDB1390,DENNDB1391,DENNDB1392,DENNDB1393,DENNDB1394,DENNDB1395,DENNDB1396,DENNDB1397,DENNDB1398,DENNDB1399,DENNDB1400,DENNDB1401,DENNDB1402,DENNDB1403,DENNDB1404,DENNDB1405,DENNDB1406,DENNDB1407,DENNDB1408,DENNDB1409,DENNDB1410,DENNDB1411,DENNDB1412,DENNDB1413,DENNDB1414,DENNDB1415,DENNDB1416,DENNDB1417,DENNDB1418,DENNDB14



2F2;GUCY2C;HARS2;HELLS;HLTF;HSPA13;HSPA14;HSPE1;ICK;IDE;IDH3G;IGHMBP2;ILK;IPMK;ITPKC;JAK2;KIAA1804;KIF11;KIF18A;KIF20B;KIF22;KIF23;KIF27;KIF2A;KIF3A;KIF5B;KIFC1;KIFC3;LACE1;LIG4;LONP1;LRRK2;MA  
K;CRLF3;CRTC2;CRY1;CTBP1;CTDSP1;CUL2;CXXC1;DAB2IP;DACH1;DAPK3;DAXX;DBP;DCAKD;DCK;DDX3X;DDX41;DDX54;DEK;DENND4A;DEPDC1;DHFRL1;DICER1;DKK3;DLG4;DMAP1;DMTF1;DNMTIP2;DPY30;DR1;DRAP1;DYRK1B;E2F4;E2F

CY2C;HARS2;HELLS;HLTF;HSPA13;HSPA14;HSPE1;ICK;IDE;IDH3G;IGHMBP2;ILK;IPMK;ITPKC;JAK2;KIAA1804;KIF11;KIF18A;KIF20B;KIF22;KIF23;KIF27;KIF2A;KIF3A;KIF5B;KIFC1;KIFC3;LACE1;LIG4;LONP1;LRRK2;MAP2K2;MA  
T3;CTBP1;CTDSP1;CUL2;CXXC1;DAB2IP;DACH1;DAPK3;DAXX;DBP;DDX11;DDX3X;DDX41;DDX54;DEK;DENND4A;DEPDC1;DICER1;DKK3;DLG4;DMAP1;DMTF1;DNA2;DNAJB9;DNAJC10;DNMTIP2;DPY30;DR1;DRAP1;DYRK1B;E2F4;E2F6;E2F7;E  
RTC2;CRY1;CTBP1;CTDSP1;CUL2;CXXC1;DAB2IP;DACH1;DAPK3;DAXX;DBP;DCAKD;DCK;DDX3X;DDX41;DDX54;DEK;DENND4A;DEPDC1;DHFRL1;DICER1;DKK3;DLG4;DMAP1;DMTF1;DNMTIP2;DPY30;DR1;DRAP1;DYRK1B;E2F4;E2F6;E2F7;E

L1;FBXW7;FCHO2;FGF7;FGFR1OP;FITM1;FMR1;FOPNL;FYTTD1;GAS6;GCC2;GDF9;GDI1;GIPCI;GLTPD1;GOLGA4;GOLT1B;GOPC;GORASP1;GPAM;GRIKS;GRIP1;GRPEL2;HDAC6;HDAC8;HEXA;HGS;HLA-DMA;HNF1A;HOMER1;HOOK1;HOOK2;IN  
TNS;CXXC1;DAB2IP;DAPK3;DAPP1;DAXX;DCAKD;DCK;DDX11;DDX3X;DEGS1;DEGS2;DGKE;DGKZ;DHFRL1;DLG1;DMPK;DNA2;DNAJB9;DNAJC10;DOLPP1;DPM1;DUSP11;DUSP19;DYRK1A;DYRK1B;DYRK2;ECT2;EEFSEC;EIF2A;EIF5;ELMOD2;EN  
P1;CTDSP1;CUL2;CXXC1;DAB2IP;DACH1;DAPK3;DAXX;DBP;DCAKD;DCK;DDX3X;DDX41;DDX54;DEK;DENND4A;DEPDC1;DHFRL1;DICER1;DKK3;DLG4;DMAP1;DMTF1;DNMTIP2;DPY30;DR1;DRAP1;DYRK1B;E2F4;E2F6;E2F7;EAF2;EAPP;EBI

528;VPS29;VPS33B;VPS36;VPS37A;VPS37B;VPS4A;VPS4B;VTA1;WDFY1;WDR44;YKT6;ZFYVE16;ZNRF1;ZN

4B;UBC;UBE2D1;UBE2E1;USP16;USP37;USP44;UTP14C;VCP1P1;VRK1;WAPAL;WEE1;XPO1;ZNF830;ZWIL

V1;PKN2;PLK4;POLR2E;PPIP5K2;PPP4C;PRKAA1;PRKAB2;PRKACB;PRKCI;PRKCZ;PRKD3;PRPF4B;PRPS2;PSKH1;PTK6;PTK7;RABEP1;RBKS;RET;RFK;RIOK2;RIPK2;RIPK3;ROCK1;RP2;RPS6KA3;RPS6KA4;RPS6KA5;RPS6KB1;RYK;SCYL1;SCYL2;SGM

DH;GBA2;GCH1;GCSH;GFM2;GIPC1;GIT1;GK;GLA;GLS;GNA13;GNAI1;GNAO1;GNL1;GNL3;GPC1;GPD2;GPI;GPR65;GTF2H1;GTF2H4;GUSB;HACE1;HDAC6;HECTD2;HECTD3;HECW2;HERC4;HEXA;HGS;HMG81;HMG82;HMGCL;HMMR;HMOX;

;SCYL2;SLK;SMG1;SNRK;STK10;STK17A;STK17B;STK32C;STK38L;STRADA;TAOK1;TBK1;TESK1;TESK2;TGFA;TGFBR1;TGFBR2;TIE1;TLK1;TRIM28;TRPM7;TTK;UHMK1;VRK1;VRK2;WEE1;Y

CREB5;CREBL2;CREBZF;CRK;CRLF3;CRTC2;CRY1;CTBP1;CTDSP1;CUL2;CXXC1;DAB2IP;DACH1;DAPK3;DAXX;DBP;DCAKD;DCK;DDX3X;DDX41;DDX54;DEK;DENND4A;DEPDC1;DHFRL1;DICER1;DKK3;DLG4;DMAP1;DMTF1;DNMTIP2;DPY30;DR1;I

AB2;PRKACB;PRKCI;PRKCZ;PRKD3;PRPF4B;PSKH1;PTK6;PTK7;RABEP1;RBKS;RET;RFK;RIOK2;RIPK2;RIPK3;ROCK1;RPS6KA3;RPS6KA4;RPS6KA5;RPS6KB1;RYK;SCYL1;SCYL2;SLK;SMG1;SNRK;STK10;STK17A;STK17B;STK32C;STK38L;STRADA;T  
NX17;SNX2;SNX8;SPCS2;SPCS3;SRP14;SRP19;SRP9;SSR3;STAM2;STON1;STRADA;STX16;STX4;STX5;STX7;STXBP4;SYNGR2;SYTL3;TGFBR1;TIMM17A;TIMM22;TIMM23;TIMM88;TLK1;TMED10;TMED2;TMEM173;TMEM30A

RP16;PC;PGAMS;PLA2G4A;PLCB1;PMAIP1;PMPCA;PNPLA7;PPIF;PPP1CC;PRKCZ;PSEN2;PTCHD2;PTGDS;RAE1;RANGAP1;RECQL5;RHOT1;RNFI3;RNF144B;RPS6KB1;SDHD;SEC13;SFXN4;SHMT2;SIRT1;SLC22A18;SLC24A6;SLC25A10;SLC2  
X16;SNX8;SPAST;SPCS2;SPCS3;SRP14;SRP19;SRP9;SRSF10;SRSF11;SRSF3;SRSF6;SSR3;STEAP2;STRADA;STX5;TGFBR1;THOC3;THOC7;TIMM17A;TIMM22;TIMM23;TIMM88;TMED10;TMED2;TMEM173;TMEM30A;TMEM30B;

TCEA1;TCF25;TDP2;THAP2;TWISTNB;UBLCP1;UTP11L;UTP14C;UTP15;UTP23;VRK1;WDR36;WDR43;WRB;XPO1;ZBTB33;ZC3H15;ZCCHC17;ZCCHC7;ZMAT3;ZNF146;ZNF22;ZNF415;ZNF622;ZNF

<IAA1804;KLHDC3;KNDC1;KRAS;LIN28A;LMNA;LPAR2;LRP6;LRRK2;LRRN3;MAD2L1;MALT1;MAP2K2;MAP2K5;MAP3K1;MAP3K11;MAP3K13;MAP3K2;MAP3K7;MAP4K1;MAP4K5;MAPK8;MAPK8IP1;MAPK8IP2;MAPKAP

;RP16;PC;PGAM5;PLA2G4A;PLCB1;PMAIP1;PMPCA;PNPLA7;PPIF;PPP1CC;PRKC2;PSEN2;PTCHD2;PTGDS;RAE1;RANGAP1;RECQL5;RHOT1;RNF13;RNF144B;RPS6KB1;SDHD;SEC13;SFXN4;SGMS2;SHMT2;SIRT1;SLC22A18;SLC24A6;SLC25A1;SLC25A1

;KD;DCK;DDX11;DDX3X;DDX41;DDX50;DDX54;DDX59;DECR1;DGKE;DGKZ;DHX30;DHX36;DHX40;DICER1;DMPK;DNA2;DNAH6;DNAJA1;DNAJC27;DYRK1A;DYRK1B;DYRK2;EEA1;EEF1A1;EEFSEC;EGLN1;EIF5;EPHB3;EPHB6;ERAL1;ERCC2;ERN

3IP;RAB6A;RAB8B;RANGAP1;RAP2A;RB1;RBCK1;RHOQ;RPGR;RPH3AL;RPL11;RPL15;RPL17;RPL23;RPL26;RPL26L1;RPL27;RPL30;RPL31;RPL34;RPL35;RPL36A;RPL39;RPL41;RPL7;RPL9;RPS15A;RPS24;RPS27;RPS29;RPS3A;RPS7;RSI

;P3;UQCRB;UQCRC1;UQCRC2;UQCRH;UQCRCQ;VI

3CC2;GDF9;GDI1;GIF;GIPC1;GLS;GLTPD1;GOLGA4;GOLT1B;GOPC;GORASP1;GPAM;GRPEL2;HDAC6;HGS;HLA-DMA;HNF1A;HOOK1;HOOK2;INPP5K;IPO11;IPO13;IPO4;ITGAV;ITPR2;JAK2;JUN;JUP;KATNB1;KCNQ1;KIF18A;KLHL2;KPNA;XO8;FBXW4;FBXW7;FGD2;FGD3;FGD4;FNBP1L;FUCA1;FUT4;GAA;GALC;GALE;GAPDH;GBA2;GCH1;GCSH;GFM2;GIPC1;GIT1;GK;GLA;GLS;GNA13;GNAI1;GNAO1;GNL1;GNL3;GPC1;GPD2;GPI;GPR65;GSTM2;GTF2H1;GTF2H4;GUSB;H

;SMC3;PSMC5;PSMC6;RAB11B;RAB14;RAB18;RAB22A;RAB27B;RAB28;RAB2A;RAB4A;RAB5A;RAB6A;RAB8B;RAD17;RAD51B;RAD51C;RALA;RAP1A;RAP1B;RAP2A;RAP2C;RASL11A;RECQL;RECQL5;RFC2;RFC3;RFC5;RHEB;RHOBTB3;RH4;PEX1;PMS1;POLQ;PPA1;PPP2R4;PSMC1;PSMC2;PSMC3;PSMC5;PSMC6;RAB11B;RAB14;RAB18;RAB22A;RAB27B;RAB28;RAB2A;RAB4A;RAB5A;RAB6A;RAB8B;RAD17;RAD51B;RAD51C;RALA;RAP1A;RAP1B;RAP2A;RAP2C;RASL11A;REI3IP;RAB6A;RAB8B;RANGAP1;RAP2A;RB1;RBCK1;RHOQ;RPGR;RPH3AL;RPL11;RPL15;RPL17;RPL23;RPL26;RPL26L1;RPL27;RPL30;RPL31;RPL34;RPL35;RPL36A;RPL39;RPL41;RPL7;RPL9;RPS15A;RPS24;RPS27;RPS29;RPS3A;RPS7;RSI

OPA1;ORC4;PEX1;PMS1;POLQ;PPA1;PPP2R4;PSMC1;PSMC2;PSMC3;PSMC5;PSMC6;RAB11B;RAB14;RAB18;RAB22A;RAB27B;RAB28;RAB2A;RAB4A;RAB5A;RAB6A;RAB8B;RAD17;RAD51B;RAD51C;RALA;RAP1A;RAP1B;RAP2A;RAP2C;R4;PEX1;PMS1;POLQ;PPA1;PPP2R4;PSMC1;PSMC2;PSMC3;PSMC5;PSMC6;RAB11B;RAB14;RAB18;RAB22A;RAB27B;RAB28;RAB2A;RAB4A;RAB5A;RAB6A;RAB8B;RAD17;RAD51B;RAD51C;RALA;RAP1A;RAP1B;RAP2A;RAP2C;RASL11A;REI

I40;TOMM5;UCP2;UCP3;UQCRB;UQCRC1;UQCRC2;UQCRH;UQCRQ;VI

I1A;PPP5C;PRKAA1;PRKCSH;PRKCZ;PSMD10;PSMG1;PTGER4;QPRT;RASA1;RDX;RICTOR;RIPK3;RZR3;SCUBE1;SENP6;SEPT7;SEPT9;SHMT2;SKAP2;SKIL;SLAIN2;SLC9A3R1;SLC9A3R2;SMAD2;SMAD4;SMARCAD1;SPAG9;SPAST;SPTBN2;SPTBN

CD28;CD2AP;CD2BP2;CD47;CDC25C;CDC26;CDC27;CDC42EP1;CDC42EP2;CDC42SE2;CDC73;CDHR1;CDK1;CDK11A;CDK11B;CDK2;CDK5R1;CDK9;CDKN1B;CDKN2AIP;CDKN2C;CEBPA;CENPE;CENPK;CENPL;CENPQ;CENPW;CEP120;CEP135;C  
I1A;PPP5C;PRKAA1;PRKCSH;PRKCZ;PSMD10;PSMG1;PTGER4;QPRT;RASA1;RDX;RICTOR;RIPK3;RZR3;SCUBE1;SENP6;SEPT7;SEPT9;SHMT2;SKAP2;SKIL;SLAIN2;SLC9A3R1;SLC9A3R2;SMAD2;SMAD4;SMARCAD1;SPAG9;SPAST;SPTBN2;SPTBN

IM2;MEF2A;MEF2D;MSH2;NBEA;NEDD4;NFATC1;NLK;NOTCH3;NRIP1;NUDT21;PARK2;PAX6;PDE3B;PDE4D;PDLIM5;PFKL;PFKM;PFN1;PIAS4;PJA2;PKD2;PKN1;PKN2;PLCB1;PLK1S1;POT1;PPP1CB;PPP1CC;PPP1R12A;PPP1R3D;PPP  
I3;MIS18BP1;MITF;MNDA;MSH2;MSL3;MTERF;MTERFD1;MTF2;MUC1;MYNN;MYSM1;NBN;NDN;NFATC1;NFIA;NFKB2;NFYB;NKRF;NR1D2;NR1H2;NR3C1;NR4A1;NR4A3;NUCB2;ORC2;ORC3;ORC4;PAIP1;PAPD5;PAX2;PAX6;PBX3;P

P2;SYCP3;SYN1;TFPT;TMPO;TNKS2;TONSL;TP63;TRIM28;TUBG1;UBE2A;UCHL5;UPF1;WAPAL;WDHD1;XPO1;ZFR;ZMYND11;ZRANB3;ZWI

;ANKRD32;ANKRD34B;ANKRD46;ANKRD49;ANLN;ANOS;ANP32E;ANXA1;AP1AR;AP1B1;AP1S2;AP2A2;AP3M1;AP3S2;AP4S1;APC;APEH;APEX1;APEX2;APH1A;API5;APIP;APLF;APOBEC3D;APOO;APPPBP2;APPL1;APTX;AQP11;ARAF;ARAP2;ARF4;ARFGAP1;AR

KRD44;ANLN;ANP32E;ANXA1;AP1B1;AP1S2;AP2A2;AP3M1;AP3S2;AP4S1;APC;APEH;APEX1;APEX2;APH1A;API5;APIP;APLF;APOBEC3D;APPPBP2;APPL1;APTX;AQP11;ARAF;ARAP2;ARF4;ARFGAP1;ARFGAP2;ARFGEF2;ARFIP1;ARG2;ARHGAP10;ARHGAP11A;/

RBBP8;REXO4;RNASEH2A;RNGTT;RPAP2;SACM1L;SERAC1;SGPP1;SMPD1;SMPD4;SMPDL3A;SSU72;SYNJ1;TATDN1;TATDN3;TDP2;TENC1;TREX1;UBLCP1;UCHL3;UCHL5;USP1;USP12;USP14;USP15;USP16;USP19;USP21;USP25;USP31;/



¿;DDX11;DDX3X;DDX41;DDX50;DDX54;DDX59;DHX30;DHX36;DHX40;DICER1;DIS3;DIS3L2;DLG1;DNA2;DNAH6;DNAI2;DNASE1L1;DNASE2;DNPEP;DOLPP1;DPEP2;DPP3;DUSP11;DUSP19;DYNC2LI1;DYNLRB1;DYNLT3;EDEM3;EEF1A1;EEFSEC,









ASSF3;REPS2;RHOH;RNF111;ROPN1L;RS1;S100A11;SBF2;SDCBP;SECTM1;SH3GLB1;SIT1;SLC8A1;SOCS3;SOD2;SOS2;SRPK1;SRPK2;STK3;STX12;SYN2;TEAD3;TG;TIAM2;TLE4;TLR2;TLR4;TLR5;TNFRSF1A;TNFSF14;TREM1;T  
ASSF3;REPS2;RHOH;RNF111;ROPN1L;RS1;S100A11;SBF2;SDCBP;SECTM1;SH3GLB1;SIT1;SLC8A1;SOCS3;SOD2;SOS2;SRPK1;SRPK2;STK3;STX12;SYN2;TEAD3;TG;TIAM2;TLE4;TLR2;TLR4;TLR5;TNFRSF1A;TNFSF14;TREM1;T  
SOD2;SOS2;SRPK1;SRPK2;STK3;TEAD3;TG;TIAM2;TLE4;TLR2;TLR4;TLR5;TNFRSF1A;TNFSF14;TREM1;TRIB1;UBR2;WLS;WNT10B;ZAK;ZFP36;ZNF  
SRP4;RASSF3;REPS2;RHOH;RNF111;ROPN1L;RS1;S100A11;SBF2;SDCBP;SECTM1;SH3GLB1;SIT1;SLC8A1;SOCS3;SOD2;SOS2;SRPK1;SRPK2;STK3;STX12;SYN2;TEAD3;TG;TIAM2;TLE4;TLR2;TLR4;TLR5;TNFRSF1A;TNFSF14;TRI  
2;NFIL3;NPEPPS;NPTN;NQO2;NR6A1;NUP50;NUPL1;OPLAH;ORM1;ORM2;OSM;OXER1;PAK2;PAPSS2;PDCD7;PDE4B;PDK3;PDZD3;PDZD8;PELI2;PGLYRP1;PHB;PIAS1;PLAU;PLD1;PLXNC1;PNP;POLD3;PPAP2B;PPP4R1;PROK2;PTI

I;RASSF3;REPS2;RHOH;RNF111;ROPN1L;RS1;S100A11;SCARF1;SDCBP;SECTM1;SH3GLB1;SIT1;SLC12A6;SLC8A1;SOCS3;SOD2;SOS2;SRPK1;SRPK2;STK3;STX3;TARBP2;TEAD3;TG;TIAM2;TLE4;TLR2;TLR4;TLR5;TNFRSF1A;TNF;  
E1;MANSC1;MARCKS;MBOAT2;MCMBP;MCTP2;MEGF9;MME;MPZL3;MRVI1;MYO10;NAIP;NCF4;NFE2L2;NMNAT2;NPTN;NUP50;NUPL1;OSBPL1A;OSM;OXER1;PAK2;PCNX;PDZD3;PGS1;PHB;PICALM;PLAU;PLB1;PLD1;PLXDC2;PLXN  
NTSC2;NUP50;ORM1;OSBPL1A;OSM;PAK2;PDK3;PDRG1;PDZD3;PELI2;PHB;PHC2;PIAS1;PICALM;PLAU;PLXDC2;PLXNC1;POLD3;PPAP2B;PPP1R3B;PPP3CC;PPP3R1;PPP4R1;PROK2;PRUNE;PTPRE;PVRL2;RAB27A;RANBP1;RAPGEF2;I

R4;TLR5;TM9SF2;TNFRSF1A;TNFSF14;TREM1;TREML2;TRPM6;TRPV5;UBR2;VAMP3;WNT

SF1A;TNFSF14;TREM1;TREML2;TRPM6;TRPV5;UBR2;VAMP3;WNT

;JHDM1D;JMJD1C;KAL1;KAZN;KCNE1;KCNH7;KCNJ15;KCNS1;KDM1B;KIAA0319;KLF6;KPNA1;KPNA4;LAMP2;LILRB3;LIMD1;LITAF;LMNB1;LMO4;LRG1;LRR6;LYN;LYVE1;MAK;MARCKS;MCMBP;MCTP2;MLLT11;MME;MPZL3;MSL1;MYC  
IHOH;RNF130;RNF145;RNF149;RNF19B;RS1;RTN3;SCARF1;SDCBP;SEC24D;SECTM1;SHROOM4;SIT1;SLC12A6;SLC15A4;SLC22A1;SLC22A14;SLC22A4;SLC26A8;SLC2A11;SLC45A4;SLC8A1;SMAGP;SNTG2;ST3GAL4;ST3GAL5;ST6GA

;RFIP1;LYN;MAK;MARCKS;MCTP2;MLLT11;MRVI1;MYO10;MYO5A;NAIP;NCOA1;NCOA2;NEDD9;NFE2;NFE2L2;NFIL3;NFYA;NPTN;NR6A1;NRBF2;NRD1;NUP50;NUPL1;ORM1;ORM2;OSBPL11;OSM;OTX1;OXER1;PAK2;PAPSS2;PDCD7;  
S;IL10RB;IL13RA1;IL1B;IL1R1;IL1R2;IL1RN;IMP3;INHBB;INPP5A;IQGAP1;IRAK3;ITGAD;ITM2B;JHDM1D;JMJD1C;KAL1;KCNE1;KCNS1;KDM1B;KIAA0232;KIAA0319;KLF6;KPNA1;LBR;LILRB3;LIMD1;LITAF;LMNB1;LMO4;LRRFIP1;LYF

LC26A8;SLC2A11;SLC45A4;SLC8A1;SMAGP;ST3GAL4;ST3GAL5;ST6GALNAC2;STX12;STX3;STX6;SUSD3;SYNGR3;TLR2;TLR4;TLR5;TM9SF2;TMCC1;TMCC3;TMCO3;TMEM132D;TMEM154;TMX4;TNFRSF1A;TNFSF14;TOR1AIP2;TRI

l;MAK;MARCKS;MBOAT2;MCMBP;ME2;MME;MRPL9;MRVI1;MXD1;MYO10;MYO5A;MZT2A;NAIP;NCF4;NCOA2;NECAB2;NEDD9;NFE2;NFE2L2;NLN;NMNAT2;NPEPPS;NPL;NQO2;NRBF2;NRD1;NT5C2;OPLAH;OSBPL1A;PAK2;PANK2;PAPSS2;

1;SMAGP;ST3GAL4;ST3GAL5;ST6GALNAC2;STX12;STX3;STX6;SUSD3;SYNGR3;TLR2;TLR4;TLR5;TM9SF2;TMCC1;TMCC3;TMCO3;TMEM132D;TMEM154;TMX4;TNFRSF1A;TNFSF14;TOR1AIP2;TREM1;TREM2;TRPM6;TRPV5;TSPA

?;IL1B;IL1R1;IL1RN;INHBB;INPP5A;INSC;IQGAP1;IRAK3;ITGAD;ITM2B;JHDM1D;JMJD1C;KAL1;KAZN;KCNE1;KCNH7;KCNJ15;KCNS1;KDM1B;KIAA0319;KLF6;KPNA1;KPNA4;LAMP2;LILRB3;LIMD1;LITAF;LMNB1;LMO4;LRG1;LRRCE



2;NEDD9;NFE2;NFE2L2;NFIL3;NFYA;NPTN;NR6A1;NRBF2;NRD1;NUP50;NUPL1;ORM1;ORM2;OSBPL11;OSM;OTX1;OXER1;PAK2;PDCD7;PDE4B;PDK3;PDZD3;PDZD8;PELI2;PGLYRP1;PHB;PIAS1;PICALM;PIF1;PLAU;PLD1;PLXNC1;PA

BARAPL1;GALNT14;GBE1;GCM1;GDE1;GIMAP1;GLIPR2;GLT1D1;GMPR2;GNAQ;GOLGA7B;GPR141;GPR17;GPR84;GPR89A;GPR97;GPSM2;GRIP2;GSDDMC;GSK3B;GTSE1;H3F3B;HAL;HAS1;HCAR2;HCAR3;HEY1;HIF1A;HIST1H1T;HIVEP1;HMGC  
BARAPL1;GALNT14;GBE1;GCM1;GDE1;GIMAP1;GLIPR2;GLT1D1;GMPR2;GNAQ;GOLGA7B;GPR141;GPR17;GPR84;GPR89A;GPR97;GPSM2;GRIP2;GSDDMC;GSK3B;GTSE1;H3F3B;HAL;HAS1;HCAR2;HCAR3;HEY1;HIF1A;HIST1H1T;HIVEP1;HMGC

13B;PPP3CC;PPP3R1;PRRG4;RAB1A;RAB27A;RAB31;RHOH;RTN3;SBF2;SDCBP;SEC24D;SECTM1;SH3GLB1;SHROOM4;SLC15A4;SLC22A4;SLC8A1;SMAGP;SNAP23;SOCS3;SOD2;SOS2;SQRL;SRPK1;ST3GAL4;ST3GAL5;ST6GALNAC2;STK3;S





































































IFAP3;KPTN;L3MBTL3;LAMA3;LIMA1;LUM;MAP1LC3A;MAP6;MAP7;MAPK3;MASTL;MET;MFAP2;MMP2;MORF4L1;MRE11A;MTCH1;MTDH;MTX1;MYO1B;NCBP1;NCBP2;NCF1;NEK4;NFIB;NIP7;NOL8;NOV;NPM2;NR1H3;NRTN;NRXN1;NUFIP;

T1B;CRTAP;CRYZL1;CSE1L;CSPG5;CSPP1;CTLA4;CTNNBIP1;CTNND2;CWC27;CYP11B1;CYP1A1;CYP2A7;CYP4V2;DARS;DBT;DCAF17;DCTN3;DDAH2;DDHD1;DDN;DDX1;DEDD2;DGAT1;DHRS7B;DHX29;DIP2C;DNAH2;DNAH9;DNAJC2;DNAJC

CTD4;KIFAP3;KPTN;L3MBTL3;LAMA3;LIMA1;LUM;MAP1LC3A;MAP6;MAP7;MAPK3;MASTL;MET;MFAP2;MMP2;MORF4L1;MPHOSPH10;MRE11A;MTCH1;MTDH;MTX1;MYO1B;NCBP1;NCBP2;NCF1;NEK4;NFIB;NIP7;NOL8;NOV;NPM2;NR1H3;N

;DDAH2;DDN;DDX1;DEDD2;DGAT1;DHRS7B;DHX29;DIP2C;DNAH2;DNAH9;DNAJC2;DNAJC8;DNER;DNM1L;DNNTIP1;DPPA4;DRD3;DSTN;DUSP1;DYNC111;DYNC2H1;EBPL;ECE2;EDNRB;EI24;EIF2S1;EIF4EBP1;ELANE;ELF3;ELP2;EML

;DDAH2;DDN;DDX1;DEDD2;DGAT1;DHRS7B;DHX29;DIP2C;DNAH2;DNAH9;DNAJC2;DNAJC8;DNER;DNM1L;DNNTIP1;DPPA4;DRD3;DSTN;DUSP1;DYNC111;DYNC2H1;EBPL;ECE2;EDNRB;EI24;EIF2S1;EIF4EBP1;ELANE;ELF3;ELP2;EML

;MAGEE1;MAPK10;MAPK3;MASTL;MCM8;MED17;MEIS3;MESP2;METTL8;MKL2;MLLT10;MLX;MMP2;MORF4L1;MPHOSPH10;MPHOSPH9;MRE11A;MT1G;MTAP;MTDH;MTL5;MTMR8;MVP;MYEF2;NAA15;NAA35;NANOG;NANOS3;NAP

;CPE;CPT1B;CRTAP;CRYZL1;CSE1L;CSPG5;CSPP1;CTLA4;CTNNBIP1;CTNND2;CWC27;CYP11B1;CYP1A1;CYP2A7;CYP4V2;DARS;DBT;DCAF17;DCTN3;DDAH2;DDHD1;DDN;DDX1;DEDD2;DGAT1;DHRS7B;DHX29;DIP2C;DNAH2;DNAH9;DNAJC2

11L;DNNTIP1;DPPA4;DRD3;DUSP1;DYNC2H1;EBPL;ECE2;EDNRB;EI24;EIF2S1;EIF4EBP1;ELANE;ELF3;ELP2;ENPP7;EPHA4;EPM2A;ERAP1;ERCC4;ERCC6;ERMP1;ERRF1;ESRRA;ESRRB;ETV3L;EXOSC4;FAAH;FANCC;FANCD2;FASTKD2;FA

11L;DNNTIP1;DPPA4;DRD3;DUSP1;DYNC2H1;EBPL;ECE2;EDNRB;EI24;EIF2S1;EIF4EBP1;ELANE;ELF3;ELP2;ENPP7;EPHA4;EPM2A;ERAP1;ERCC4;ERCC6;ERMP1;ERRF1;ESRRA;ESRRB;ETV3L;EXOSC4;FANCC;FANCD2;FASTKD2;FAT1;FBX

NIH2;CNTN2;COL16A1;COL18A1;COL23A1;COL4A2;COL9A1;COX6B1;CP;CPE;CPT1B;CPXM2;CRTAP;CRYZL1;CSE1L;CSPG5;CSPP1;CTLA4;CTNNBIP1;CTNND2;CWC27;CXCL3;CYP11B1;CYP1A1;CYP4V2;DAAM2;DARS;DBT;DCAF17;DCTN3;DDA

:NPP7;EPHA4;EPM2A;ERAP1;ERMP1;EXOSC4;FADD;FAH;FANCC;FASTKD2;FAT1;FHOD3;FKBP14;FKTN;FMO4;FOXO1;FSTL3;FTH1;FUT1;FUT3;FUT7;FUT8;FZD9;G3BP2;GABARAP;GALK1;GATM;GCLC;GJC1;GNB2;GNPAT;GNPNAT1;GNPTAI

AF4B;TCERG1;TCF12;TERF1;TFB1M;TFEB;THBS1;THRSP;TIPIN;TNFSF8;TNKS;TRAK2;TRIM32;TRIM37;TRIP6;TRMT6;TSC22D3;TTF2;UBP1;UPF3B;USF1;USP47;WNT11;YAP1;ZBTB44;ZC3H12A;ZC3H8;ZFP90;ZFPL1;ZIK1;ZKSCAN

HK1;SPI1;SRA1;SRFBP1;SYNCRIP;TAF4B;TCERG1;TCF12;TERF1;TFB1M;TFEB;THBS1;THRSP;TIPIN;TNFSF8;TNKS;TRAK2;TRIM32;TRIM37;TRIP6;TRMT6;TSC22D3;TTF2;UBP1;UPF3B;USF1;USP47;WNT11;YAP1;ZBTB44;ZC3H12A;ZC









IL12;GNAI5;GNAI2;GNAS;GNB1;GPX7;GRB2;GSK3A;GSN;GTF2H5;HCK;HDAC4;HDGF;HERPUD1;HFE;HIPK2;HLA-B;HLA-C;HLA-DPA1;HLA-E;HMOX1;HSPA1B;HSPA5;IFNAR2;IGF1R;IL17RA;IL23A;IL4R;IL6R;ING4;INTS3;IRAK

2;SEC16A;SEC22A;SEC23B;SEC31A;SEC61G;SFT2D3;SLC11A1;SLC7A6OS;SMURF1;SNAP29;SNX1;SNX12;SNX19;SNX24;SNX27;SNX30;SOX4;SPCS1;SRP54;SRPR;SSR2;STAT3;STEAP3;STX18;SYK;TACC3;TAP2;TGFB1;TIMM8A;TIMM

L2;NXT1;OPTN;OS9;P2RX1;PACS1;PAFAH1B1;PAK1;PDCD6;PECAM1;PEX7;PIK3CD;PINK1;PLCG2;PLEK;PMPCB;POU2F2;POU5F1;PPID;PPP1R10;PPT1;PRAM1;PRKACA;PSAP;PSEN1;PTK2B;PTTG1IP;RAB23;RAB35;RAB3D;RAB43;RAB7A  
1;PLEK;PMPCB;POU2F2;POU5F1;PPID;PPP1R10;PPT1;PRAF2;PRKACA;PRKCB;PRKCD;PSAP;PSEN1;PTTG1IP;RAB11F1P1;RAB19;RAB23;RAB35;RAB36;RAB3D;RAB40B;RAB43;RAB5B;RAB5C;RAB7A;RAB8A;RALB;RALGAPA2;RAMP1;RBM2

EC1;IRF2;ISG20L2;JARID2;KATS;KAT6A;KAT7;KDM2A;KDM5B;KLF4;KPNB1;LEFTY2;LRRCS9;LZTS1;MAEA;MAFB;MAFG;MAML1;MAML3;MAP2K3;MAPK14;MAU2;MAX;ME3;MED12;MED25;MIDN;MIS18A;MKNK2;MLH3;MLL2;MLL1;MP

11;NFKBIA;NLR4;NLRP12;NLRP3;NME1;NME2;NOD2;NOTCH1;NOTCH2;NUAK2;NUDT2;OPTN;P2RX1;PAK1;PARP4;PDCD5;PDCD6;PHLPP1;PIM1;PIM2;PINK1;PLAC8;PLAGL2;PLCG2;PNMA1;PPID;PPM1F;PPT1;PREX1;PRKCB;PRK  
11;NFKBIA;NLR4;NLRP12;NLRP3;NME1;NME2;NOD2;NOTCH1;NOTCH2;NUAK2;NUDT2;OPTN;P2RX1;PAK1;PARP4;PDCD5;PDCD6;PHLPP1;PIM1;PIM2;PINK1;PLAC8;PLAGL2;PLCG2;PNMA1;PPID;PPM1F;PPT1;PREX1;PRKCB;PRK  
5;KAT6A;KAT7;KDM2A;KDM5B;KLF4;KPNB1;LEFTY2;LRRCS9;LZTS1;MAEA;MAFB;MAFG;MAML1;MAML3;MAP2K3;MAPK14;MAU2;MAX;ME3;MED12;MED25;MIDN;MIS18A;MKNK2;MLH3;MLL2;MLL1;MMP14;MRP63;MRPL11;MRPL27

NFKBIA;NLR4;NLRP12;NLRP3;NMB;NOD2;NOTCH1;NOTCH2;NRBP1;NUP98;NUP12;NXT1;OPTN;OS9;P2RX1;PACS1;PAFAH1B1;PAK1;PDCD6;PECAM1;PEX7;PID1;PIK3CD;PINK1;PLCG2;PLEK;PLXNA2;PMPCB;POU2F2;POU5F1;PPID;PPF  
;IL17RA;IL23A;IL4R;IL6R;INSR;IQSEC1;IRAK2;ITGA5;ITGB2;ITSN1;JAK1;JAK3;KIAA1324;KIR3DL1;KLF4;KLRC4-KLRK1;KREMEN1;LAT2;LCF2;LILRA1;LILRB1;LILRB2;LRP1;LZTS1;MAGI2;MAP2K1;MAP2K3;MAP3K3;MAP3K5;M

A;AMP2;SEC16A;SEC22A;SEC23B;SEC31A;SEC61G;SFT2D3;SLC11A1;SLC7A6OS;SMURF1;SNAP29;SNX1;SNX12;SNX19;SNX24;SNX27;SNX30;SOX4;SPCS1;SRP54;SRPR;SSR2;STAT3;STEAP3;STX18;SYK;TACC3;TAP2;TGFB1;TIMM8  
KDM5B;KLF4;KPNB1;LRRCS9;LZTS1;MAEA;MAFB;MAFG;MAML1;MAML3;MAP2K3;MAPK14;MAU2;MAX;ME3;MED12;MED25;MIDN;MIS18A;MKNK2;MLH3;MLL2;MLL1;MMP14;MRP63;MRPL11;MRPL27;MRPL34;MRPL35;MRPL36;MRPL4

MGN3;HMOX1;HNRNPD;HNRNPF;HNRNPK;HNRNPUL1;IFNAR2;IFT46;IKZF1;IL23A;ING4;INSR;IRAK2;IRF2;JAK3;JARID2;KATS;KAT6A;KAT7;KDM2A;KDM3B;KDM4B;KDM5B;KDM6B;KHDRBS2;KIAA0430;KLF13;KLF4;KLF7;K

3;CBX1;CBX6;CBY1;CC2D2A;CCL3;CCNK;CCRN4L;CD101;CD14;CD1D;CD209;CD3D;CD44;CD53;CD86;CD97;CDC42;CDC42EP4;CDC42SE1;CDC5L;CDH1;CELA1;CELF3;CERKL;CFL1;CFLAR;CHD8;CHEK1;CHKA;CHRNB1;CHRN2;CHST11;CITED2;  
N1;CAPNS1;CAP2B;CARM1;CAS3;CASP6;CASP9;CAST;CASZ1;CBFA2T3;CBL;CBX1;CBX6;CBY1;CC2D2A;CCL3;CCNK;CCRN4L;CD101;CD14;CD1D;CD209;CD3D;CD44;CD53;CD86;CD97;CDC42;CDC42EP4;CDC42SE1;CDC5L;CDH1;CELA1;CELF3;C

RAB5B;RAB5C;RAB7A;RAB8A;RALB;RALGAPA2;RAMP1;RBM22;RERE;RHBDF2;RHOA;RPAIN;RPH3A;RPL6;RPLP0;RPN1;RPS10;RPS9;RRAGB;RRAGC;RRBP1;SCAMP2;SEC16A;SEC22A;SEC23B;SEC31A;SEC61G;SFT2D3;SH3PX2D;SIN3

I2;RPS6KA1;RTF1;RXRA;SAP130;SBD5;SETD1B;SF3B4;SIN3A;SKI;SMAD9;SMARCA2;SMUG1;SMURF1;SNAPC5;SNRPA1;SNRPF;SP140;SPATA24;SPEN;SQSTM1;SRP54;SRSF2;SRSF4;SRSF7;STAT3;STAT5A;STAT5B;STK24;SUPT3H;TADA2B;T  
KIAA1324;KIF13A;KLHL21;LCP1;LIMK1;LRP1;MAEA;MAP15;MAP2K1;MAPRE1;MAPRE3;MARK2;MAU2;MFN2;MICAL2;MIS12;MIS18A;MLH3;MLL2;MSL3P1;MYB;MYH11;MYH9;MYO1F;MYO7A;NACC2;NAP1L3;NAP1L5;NCF2;NCOR1;NDEL1;NL

N;MIS18A;MKNK2;MLH3;MLL2;MLL1;MRPS14;MRPS23;MRTO4;MSN;MX2;MYB;MYH9;MYOF;N4BP1;NACC2;NCF2;NCOA6;NCOR1;NDEL1;NEK6;NFKB1;NFYC;NLRP6;NMNAT1;NOD2;NOL7;NOTCH1;NOTCH2;NPM3;NR2C1;NRBP1;NUP35;NUP98

CD6;PHLPP1;PIM1;PIM2;PINK1;PLAC8;PLAGL2;PLCG2;PNMA1;PPID;PPM1F;PPT1;PREX1;PRKCB;PRKCD;PRKDC;PRKRA;PSEN1;PSMB2;PSMD3;PSME3;PSMF1;PTK2B;PTPN6;RAC1;RAF1;RALB;RASSF5;RFFL;RHOA;RIPK1;RNF34;RNF4  
RIN;FZD1;GAB2;GABRR2;GCC1;GCK;GDI2;GLMN;GLUL;GNAI2;GNAS;GOLGA5;GOLIM4;GOSR1;GRB10;GRB2;GSK3A;GSN;HCK;HCLS1;HDLBP;HFE;HGSNAT;HIP1;HK1;HK2;HMGN3;HMOX1;HNRNPK;HSPA5;IFT43;IFT46;IGF2R;IL23A;IL4R;IMI  
A;K1;EIF2B3;EIF4A2;EIF4EBP2;EIF4H;ELF4;ELK1;ELL3;ENO1;EP300;ERC1;ERF;ESR1;ESRP2;EXTL3;EYA3;FAM120B;FAM129A;FAM162A;FAM58A;FBP1;FBXO22;FGF9;FIS1;FKBP15;FKBP1A;FLCN;FLT3;FOSL2;FOXJ2;I  
N;FZD1;G6PD;GAPDH;GAS7;GBA;GCK;GIGYF2;GLI1;GLMN;GLO1;GNAI2;GNAS;GNRH1;GRB10;GSK3A;GTF2F1;GTF2H5;GTF3A;GTPBP1;H2AFY;HAX1;HCK;HCLS1;HDAC4;HDGF;HENMT1;HERPUD1;HESX1;HEXB;HIP1;HI

.PP1;PIM1;PIM2;PINK1;PLAC8;PLAGL2;PNMA1;PPID;PPM1F;PPT1;PREX1;PRKCB;PRKCD;PRKDC;PRKRA;PSEN1;PSMB2;PSMD3;PSME3;PSMF1;PTK2B;PTPN6;RAC1;RAF1;RALB;RASSF5;RFFL;RHOA;RIPK1;RNF34;RNF41;RPS6KA1;RRA

;FAM120B;FAM129A;FAM58A;FBP1;FBXO22;FKBP15;FKBP1A;FLCN;FLT3;FOSL2;FOXJ2;FOXN3;FOXO4;FOXP3;FURIN;FZD1;G6PD;GAPDH;GAS7;GBA;GCK;GIGYF2;GIT2;GLI1;GLMN;GLO1;GMIP;GNAI2;GNAL;GNAS;GRB1

3LES2;CACNG8;CALCOCO1;CAMK1D;CAMK2G;CAMK2C;CAMTA1;CANT1;CAP1;CAPN1;CAPNS1;CAPZB;CARM1;CAS3;CASP6;CASP9;CAST;CASZ1;CBFA2T3;CBL;CBX1;CBX6;CBY1;CC2D2A;CCL3;CCNK;CCRN4L;CD101;CD14;CD1D;CD209;CD3D;CD  
D3;EIF2D;ELMO1;ELMO2;EMR2;ENSA;EPB41L3;EPHB1;EPS15L1;ERC1;ERGIC1;F11R;F13A1;FABP6;FAM160A2;FAM21A;FAM21C;FBN2;FBXO22;FCN1;FGF9;FIS1;FKBP15;FKBP1A;FLCN;FLVCR2;FOXP3;FSCN1;FTO;FURIN;FZD1;GAB2;GAE  
ATAD2B;GBA;GCK;GDDP1;GIT2;GLB1;GLB1L;GLI1;GLO1;GLUL;GMEB1;GMIP;GNA11;GNA12;GNA15;GNAI2;GNAL;GNAS;GNAT2;GNS;GSN;GTF3A;GTPBP5;HAAO;HDAC4;HDCC2;HDCC3;HENMT1;HEXB;HGD;HIVEP3;HMOX1;HSCB;HSPA5;IKZF1;I  
VEK6;NFAM1;NFKBIA;NKIRAS2;NLRP12;NLRP3;NOD2;NOTCH1;NOTCH2;PAFAH1B1;PAK1;PHLPP1;PIK3CD;PIK3RS5;PIM2;PINK1;PLCG2;PLCL2;PLEK;PLEKHG6;PLEKHM1P;PPM1F;PRDX4;PREX1;PRKACA;PRKCB;PRKCD;PRKD2;PSAP;PSEN1;P

L;NOL7;NOTCH1;NOTCH2;NPM3;NR2C1;NRBP1;NUP98;PAF1;PBX2;PCBP1;PCBP2;PHF12;PHF2;PHF21A;PHF8;PIGH;PKNOX1;PNMA1;POLE4;POLR2A;POLR3F;POLR3GL;POPS;POU5F1;PPID;PRIM1;PRKDC;PRKDC;PSMB2;PSMD3;PSME3;PSMF1;P

3S4;BCCIP;BCDIN3D;BCKDHA;BCL2L13;BCL6;BCL9;BCO2;BCOR;BCORL1;BEAN1;BECN1;BEX2;BHLHE40;BICD2;BIN2;BLOC1S3;BNIP3;BOD1;BPNT1;BRAP;BRCA1;BRD3;BRD4;BRD8;BRE;BRPF3;BSCL2;BSG;BTBD9;BTG2;BTG3;BTX;BTN3A1;BUB3;BZW

B1;GMIP;GNA11;GNA12;GNA15;GNAI2;GNAL;GNAS;GNAT2;GNS;GSN;GTF3A;GTPBP5;HAAO;HDAC4;HDDC2;HDDC3;HENMT1;HGD;HIVEP3;HMOX1;HSCB;HSPA5;IKZF1;IMPDH1;ING4;IRF2BPL;ISCU;ITGA5;ITGAE;ITGAM;ITGAX;ITGB2;ITPI

RIN;FZD1;GAB2;GABRR2;GCC1;GCK;GDI2;GLMN;GLUL;GNAI2;GNAS;GOLGA5;GOLIM4;GOSR1;GRB10;GRB2;GSK3A;GSN;HCK;HCLS1;HDLBP;HFE;HGSNAT;HIP1;HK1;HK2;HMGN3;HMOX1;HNRNP;HSPA5;IFT43;IFT46;IGF2R;IL23A;IL4R;IMI

ISPA5;JGF1R;IL23A;IL6R;IMMP2L;ING4;INSR;IRAK2;ITGA5;ITGB2;JAK1;JAK3;JARID2;KATS;KAT6A;KAT7;KDM2A;KDM5B;KDM6B;KIAA0317;KLHL21;KSR1;LIMK1;LIPT1;LMTK2;MAML1;MAN2A2;MANBA;MAP2K1;MAP2K3;MAP  
RNPUL1;HSPA5;IFNAR2;JGF1R;IKZF1;IL23A;ING4;INSR;IRAK2;IRF2;JAK3;JARID2;KATS;KAT6A;KAT7;KDM2A;KDM3B;KDM4B;KDM5B;KDM6B;KHDRBS2;KLF13;KLF4;KLF7;KLF9;KLRB1;LOXL3;LPIN2;LZ

RNP;HNRNPUL1;HSPA5;IFNAR2;JGF1R;IKZF1;IL23A;ING4;INSR;IRAK2;IRF2;JAK3;JARID2;KATS;KAT6A;KAT7;KDM2A;KDM3B;KDM4B;KDM5B;KDM6B;KHDRBS2;KLF13;KLF4;KLF7;KLF9;KLRB1;LOXL3;LPIN2;LZ  
9A;FAM58A;FBP1;FBXO22;FKBP1A;FLCN;FLT3;FOSL2;FOXJ2;FOXN3;FOXO4;FOXP3;FURIN;FZD1;G6PD;GAPDH;GAS7;GBA;GCK;GIGYF2;GIT2;GLI1;GLMN;GLO1;GMIP;GNAI2;GNAL;GNAS;GRB10;GSK3A;GTF2F1;GTF2H

MP;PCB;POU2F2;POU5F1;PPID;PPP1R10;PPT1;PRAF2;PRKACA;PRKCB;PRKCD;PSAP;PSEN1;PTTG1IP;RAB11FIP1;RAB19;RAB23;RAB35;RAB36;RAB3D;RAB40B;RAB43;RAB5B;RAB5C;RAB7A;RAB8A;RAMP1;RBM22;RBM8A;RERE;RHBDF2;R

NUP35;NUP98;NUPL2;NXT1;ORMDL1;OS9;OSBP;OST4;PAFAH1B1;PAK1;PCYT1A;PDCD6;PECAM1;PIGC;PIGH;PLAUR;PLOC1;PSEN1;PTPLA;PTPN1;QSOX1;RAB11FIP1;RAB23;RAB35;RAB36;RAB43;RAB7A;RAB8A;RAC1;RAC2;RCC1;RHBDF2  
K;CCRN4L;CD3D;CD44;CD86;CDC42;CDC5L;CDH1;CDKL3;CELA1;CELF3;CENPH;CERS2;CFL1;CFLAR;CHD8;CHEK1;CHKA;CHRN2;CHST11;CHST15;CHST7;CITED2;CLPX;CLTC;CNOT1;CNOT4;CNPY2;COP57A;COPS8;COQ3;COQ5;COX17;COX5

AML1;MAML3;MAP2K1;MAP2K3;MAPK13;MAPK14;MAPRE3;MED12;MED25;MLL2;MLLT1;MSL3P1;MTERFD3;MTF1;MYB;MYCL1;NACC2;NCOA6;NCOR1;NDNL2;NFAM1;NFIC;NFKB1;NFKBIA;NFYC;NHLH1;NLRC4;NLRP12;NLRP3;NI  
C1;DNAJB12;DNAJB5;DNAJB6;DNAJC14;DNAJC18;DNAJC19;DNAJC5;DNAJC5B;DNM2;DNMT3B;DPAGT1;DPF2;DPHS;DSCC1;DUSP12;DUSP18;DUT;DVL3;DYNLL1;DYRK4;ECE1;EEPD1;EGR1;EID2B;EID3;EIF2AK1;EIF2B3;EIF4A2;EIF

;CSF1R;CSNK1D;CSNK2A1;CTDP1;CTDSP2;CTSA;CTSB;CTSD;CTSZ;CYB5A;CYB5R1;CYB5R3;CYP27A1;CYP2R1;CYP4F3;DAPK1;DAPK2;DCLRE1B;DDTL;DGKG;DHTKD1;DHX34;DHX8;DNAH17;DNM2;DNMT3B;DPAGT1;DPHS;DUS4L;DUSP12;DUSP

6B;KHDRBS2;KLF13;KLF4;KLF7;KLF9;LILRB1;LOXL3;LPIN2;LZTS1;MAFB;MAML1;MAML3;MAP2K1;MAP2K3;MAPK13;MAPK14;MAPKAPK5;MAPRE3;MED12;MED25;MKNK1;MKNK2;MLL2;MLLT1;MSL3P1;MTERFD3;MTF1;MYB;M  
A;KDM3B;KDM4B;KDM5B;KDM6B;KHDRBS2;KLF13;KLF4;KLF7;KLF9;LILRB1;LOXL3;LPIN2;LZTS1;MAFB;MAML1;MAML3;MAP2K1;MAP2K3;MAPK13;MAPK14;MAPKAPK5;MAPRE3;MARCH8;MED12;MED25;MKNK1;MKNK2;M

I;COL5A2;COLEC12;CORO1C;CREBBP;CRKL;CRY2;CSF1;CSF1R;CSF2RB;CSF3R;CSNK1D;CSNK2A1;CTDSP2;CTNNA1;CTNNAL1;CTNNB1;CTNND1;CTSB;CTSD;CUX2;CXCR2;CXCR7;CYP27A1;CYP2R1;CYP4F3;DAB2;DAG1;DAP;DAP3;DAPK1;DAPK2;

T43;IFT46;IL23A;IL4R;IMMP2L;INSR;IRS2;ITSN1;JAK3;JPH4;KCNAS;KCN3;KCN2D1;KCN2G;KCN6;KCNMB3;KCNMB4;KIAA0196;KIF13A;KIF1B;KIF1C;KPNB1;LASP1;LAT2;LCP2;LEFTY2;LILRB1;LILRB2;LIN7B;LMTK2;LRP1;LRP10;LTBP2

RIM27;TXNIP;UBE2V1;VASP;WAS;XIAP;YTHI  
KBA;NFYC;NOD2;NOTCH1;NSD1;NUB1;PAF1;PAK1;PBX2;PHF2;PHF8;PIAS3;PID1;PIK3R5;PIM1;PIM2;PKNOX1;PLAC8;POLR2A;POMC;POU2F2;POU5F1;PRKACA;PRKCD;PRKD2;PRKDC;PSEN1;PSMB2;PSMD3;PSME3;PSMF1;PTK21

4;SPDYA;SPRED1;SQSTM1;SRF;SRPR;STK24;SYK;TBC1D14;TIRAP;TLN1;TLR9;TP53INP2;TP53TG1;TPP1;TTC5;UBE2V1;UBE4B;ULK1;UVRAG;WIPI1;WIPI2;XIAP;XPA;XRCC6BP1;XYLT1;YY1;ZSW

12;MED25;MLL2;MLL1;MSL3P1;MTERFD3;MTF1;MYB;MYCL1;NACC2;NCOA6;NCOR1;NDNL2;NFAM1;NFIC;NFKB1;NFKBIA;NFYC;NHLH1;NLR4;NLRP12;NLRP3;NME2;NOD2;NOTCH1;NOTCH2;NR2C1;NSD1;PADI4;PAF1;PBX2;PFDN1

;TBC1D9;TIMP2;TXNIP;VAV1;WAS;WNK1;XIAP;YWH  
MAPRE3;MED12;MED25;MLL2;MLL1;MSL3P1;MTERFD3;MTF1;MYB;MYCL1;NACC2;NCOA6;NCOR1;NDNL2;NFAM1;NFIC;NFKB1;NFKBIA;NFYC;NHLH1;NLR4;NLRP12;NLRP3;NME2;NOD2;NOTCH1;NOTCH2;NR2C1;NSD1;PADI4;PAF1

;TFB2M;TFE3;TGFBI;THRAP3;TIMP2;TINF2;TLR9;TNFSF13;TNIP1;TP53INP2;TRERF1;TTC5;UBE2V1;USP22;VDR;WDR61;YEATS4;YWHAH;ZMIZ1;ZNF287;ZN  
YF2;GLI1;GLMN;GLO1;GMEB1;GNAS;GNRH1;GTF2F1;GTF2H5;GTF2I;GTF3A;H2AFY;HAX1;HCK;HCLS1;HDAC4;HDGF;HENMT1;HESX1;HEXB;HIP1;HIPK2;HIVEP3;HMGN3;HMOX1;HNRNPD;HNRNPF;HNRNPK;HNRNPUL1;HSPA1  
;KSR1;LIMK1;LIP1;LMTK2;MAML1;MAN2A2;MANBA;MAP2K1;MAP2K3;MAP3K3;MAP3K5;MAP4K4;MAPK13;MAPK14;MAPKAPK5;MARCH8;MARK2;MERTK;MGRN1;MKNK1;MKNK2;MLL2;MLL1;MSRA;MTMR3;MYB;N4BP1;N6AMT1;NACC2;N

AK2;IRF2;IRS2;JAK3;JARID2;KAT5;KAT6A;KAT7;KDM2A;KDM3B;KDM4B;KDM5B;KDM6B;KHDRBS2;KLF13;KLF4;KLF7;KLF9;KLR4-KLRK1;LILRB1;LOXL3;LPIN2;LZTS1;MAFB;MAML1;MAML3;MAP2K1;MAP2K3;MAPK13;P

TGFB1;TIAL1;TIRAP;TLR9;TNFRSF1B;TNIP1;TRAT1;TRIM25;TXNIP;UBE2V1;WAS;>

P2;TINF2;TLR9;TNFSF13;TNIP1;TP53INP2;TRERF1;TTC5;UBE2V1;USP22;VDR;WDR61;YEATS4;YWHAH;ZMIZ1;ZNF287;ZN  
A6;NCOR1;NDNL2;NFIC;NFKB1;NFKBIA;NFYC;NOD2;NOTCH1;NSD1;NUB1;PAF1;PAK1;PBX2;PHF2;PHF8;PIAS3;PID1;PIK3R5;PIM1;PIM2;PKNOX1;PLAC8;POLR2A;POMC;POU2F2;POU5F1;PPM1F;PRKAB1;PRKACA;PRKCD;PRKD2;

HKT1D1;DHX34;DHX8;DNAH17;DNM2;DNMT3B;DPF2;DUS4L;DUSP12;DYRK4;ECE1;EFHA2;EFHC1;EGR1;EHD1;EHD3;EIF2AK1;EIF4A2;ELAC1;EMR2;ENDOU;ENO1;ENOPH1;EP300;EPB41;EPHB1;EPHB2;EPS15L1;ESR1;EXTL3;EYA3;F13A1;FAH

S2;JAK3;JARID2;KAT5;KAT6A;KAT7;KDM2A;KDM3B;KDM4B;KDM5B;KDM6B;KHDRBS2;KLF13;KLF4;KLF7;KLF9;KLR4-KLRK1;LILRB1;LOXL3;LPIN2;LZTS1;MAFB;MAML1;MAML3;MAP2K1;MAP2K3;MAPK13;MAPK14;MAPK

2K3;MAP3K3;MAP3K5;MAP4K4;MAPK13;MAPK14;MAPKAPK5;MARCH8;MARK2;MERTK;MGRN1;MKNK1;MKNK2;MLL2;MLL1;MSRA;MTMR3;MYB;N4BP1;N6AMT1;NACC2;NAE1;NCOR1;NDNL2;NDUFAB1;NEK3;NEK6;NLRP12;NOD2;NSD1;NU/  
2K3;MAP3K3;MAP3K5;MAP4K4;MAPK13;MAPK14;MAPKAPK5;MARCH8;MARK2;MERTK;MGRN1;MKNK1;MKNK2;MLL2;MLL1;MSRA;MTMR3;MYB;N4BP1;N6AMT1;NACC2;NAE1;NCOR1;NDNL2;NDUFAB1;NEK3;NEK6;NLRP12;NOD2;NSD1;NU/

ARP4;PCYT1A;PFKFB3;PGK1;PHKA2;PIGC;PIGH;PIK3CD;PIM1;PIM2;PINK1;PIP4K2C;POLE4;POLR2A;POLR3F;PRIM1;PRKAB1;PRKACA;PRKCB;PRKCD;PRKD2;PRKDC;PRMT5;PRMT6;PSTK;PTK2B;PYGL;RABGGTB;RAF1;RIPK1;RPN1;RPS6KA1;S

NT1;CAP1;CAPN1;CARM1;CARS;CASC3;CASP6;CASP9;CAST;CASZ1;CBFA2T3;CBL;CBR3;CBX1;CBX6;CBY1;CCBL1;CCL3;CCNB1IP1;CCNK;CCRN4L;CD3D;CD44;CD86;CDC42;CDC5L;CDH1;CDKL3;CELA1;CELF3;CENPH;CERS2;CES1;CFL1;CFLA

FBC1D14;TGFB1;TGOLN2;TLR9;TMEM132A;TMEM43;TRAPPC2;VCAN;WIPI1;XYLT1;YIPF3;ZDHHHC3;ZDHHHC7;ZFY

1;HAX1;HCK;HCLS1;HDAC4;HDGF;HERPUD1;HEXB;HIP1;HIPK2;HIVEP3;HLA-DPA1;HMGN3;HMOX1;HNRNPD;HNRNPK;HRK;HSPA1B;HSPA5;ICOS;IGF1R;IKZF1;IL23A;IL4R;IL6R;ING4;INSR;IRAK2;IRS2;ITGA5;ITSN1;JAK3

f

(BP15;FKBP5;FKBP9;FLCN;FLT3;FNTB;FOXP3;FURIN;FZD1;G6PD;GALNT11;GALNT2;GBA;GICNT7;GIGYF2;GLMN;GNA11;GNA15;GNAI2;GSK3A;HAX1;HCK;HCLS1;HDAC4;HDGF;HERPUD1;HEXB;HIPK2;HM13;HMOX1;HSCB;H

P1;HIPK2;HIST3H2A;HMGN3;HMGN4;HMOX1;HNRNPK;HSD17B14;HYLS1;IFT43;IFT46;IKZF1;IP6K1;IQCB1;IQSEC1;ISG20L2;JAK1;JAK3;KAT5;KAT6A;KATNA1;KDM2A;KDM5B;KIF13A;KIF1B;KIF1C;KIF3C;KLF4;KLHL21;KRT2;LASP1;I  
P1;HIPK2;HIST3H2A;HMGN3;HMGN4;HMOX1;HNRNPK;HSD17B14;HYLS1;IFT43;IFT46;IKZF1;IP6K1;IQCB1;IQSEC1;ISG20L2;JAK1;JAK3;KAT5;KAT6A;KATNA1;KDM2A;KDM5B;KIF13A;KIF1B;KIF1C;KIF3C;KLF4;KLHL21;KRT2;LASP1;I  
L;PIK3R5;PIM1;PIM2;PKNOX1;PLAC8;POLR2A;POMC;POU2F2;POU5F1;PPM1F;PRKAB1;PRKACA;PRKCD;PRKD2;PRKDC;PSEN1;PSMB2;PSMD3;PSME3;PSMF1;PTK2B;PXN;RAC1;RAF1;RAMP1;RBM20;RBM22;RBPJ;RHOA;RIPK1;RN

;CSNK1D;CSNK2A1;CTDP1;CTDSP2;CTIF;CTNNB1;CTNND1;CTSA;CTSB;CTSD;CTS2;CUX1;CUX2;CWC15;CXCR2;DAB2;DAG1;DAP;DAPK1;DAPK2;DBNL;DCLRE1B;DEDD;DENND3;DHX8;DISC1;DNAJB12;DNAJB5;DNAJB6;DNAJC14;DNAJ

2;DNMBP;DOCK2;DOCK5;DOCK6;DOCK8;DOK3;DPF2;DVL3;EGR1;EIF4A2;EIF4EBP2;ELK1;ELMO1;EMR2;EP300;EPHB1;EPHB2;EPS15L1;ERC1;ESR1;EVC;EXTL3;F11R;FAM162A;FBN2;FBP1;FCN1;FGF9;FIS1;FKBP1A;FLCN;FLT3;FOXO4;FOXP3

4;STK4;TEX261;TGFB1;TIAL1;TMBIM6;TNFRSF9;TP53BP2;TRAIP;TXNDC5;TXNIP;UNC5B;XIAP;XPA;ZC3H

NBR1;NCOR1;NDEL1;NUB1;NUDT15;NUDT7;OS9;PAFAH1B1;PCBP2;PDE7B;PEX7;PFKFB3;PGAM1;PGD;PGK1;PGM1;PHKA2;PHYH;PIM2;PINK1;PLA2G12A;PLA2G16;PLBD2;PLCG2;PLIN1;PPT1;PREX1;PRKACA;PRKCD;PSEN1;PSMB2;PSMD3;PSME3;PS

;GLUL;GNA11;GNA12;GNA15;GNAI2;GNAL;GNAS;GNAT2;GNB1;GNB5;GOSR1;GRB2;GSK3A;GSN;GTF2F1;GTPBP1;H1FO;H2AFY;HAX1;HCK;HCLS1;HDAC4;HDGF;HDLBP;HENMT1;HFE;HIST3H2A;HLA-B;HLA-C;HLA-DPA1;HLA-E;HNRNFI

R1;GRB2;GSK3A;GSN;GTF2F1;GTPBP1;HAX1;HCK;HCLS1;HDAC4;HDGF;HFE;HLA-B;HLA-C;HLA-DPA1;HLA-E;HSPA1B;HSPA5;IFT46;IL23A;IL6R;IMMP2L;ING4;INSR;INTS3;ITGA5;ITGAE;ITGAM;ITGAX;ITGB2;ITGB4;JARID2;K

1237;TMEM67;TNFRSF1B;TTL4;ULK1;VAMP2;VASP;VIM;WA

'B47;ZBTB5;ZC3H13;ZC3H3;ZC3H7A;ZC3HC1;ZCCHC24;ZCCHC3;ZDHHHC18;ZDHHHC3;ZDHHHC5;ZDHHHC7;ZFAND2A;ZFAND3;ZFH3;ZFP106;ZFP30;ZFP36L2;ZFP37;ZFYVE1;ZMIZ1;ZNF10;ZNF14;ZNF140;ZNF16;ZNF165;ZNF174;ZNF

1;SP140;SP2;SQSTM1;SRSF7;TADA2B;TAF15;TBXAS1;TCF20;TIMM9;TOE1;TOP3A;TRAIP;TRERF1;TRIM25;TRIM27;TRIM67;TRIM8;USP22;VDR;XIAP;XRN2;YY1;ZBTB37;ZBTB47;ZBTB5;ZC3H13;ZC3H3;ZC3H7A;ZC3HC1;ZCCHC24;ZC



1B;BCL2;BCL9L;BDH1;BEX1;BICD1;BIRC6;BLM;BLMH;BLOC1S1;BMP2;BPTF;BRD1;BRD2;BRD7;BRPF1;BRSK2;BTRC;C14orf169;C1D;C1GALT1C1;C22orf28;C2CD3;CAD;CALM3;CALR;CAMTA2;CAND2;CAPN3;CAPN5;CARD11;CARD14;CARNS1  
CHST12;CHTF8;CIAO1;CIC;CIITA;CINP;CIRH1A;CIZ1;CKM;CLK2;CLN8;CMKLR1;CNDP2;CNOT10;COX10;COX15;CP5F3;CREB3L2;CREG1;CREM;CRTC1;CRTC3;CRY2;CSNK1E;CSNK2A2;CSRNP2;CSTF1;CSTF2;CSTF3;CTC1;CTCF;CTNBL1;C  
;FBXO21;FEN1;FIP1L1;FLYWCH1;FOSB;FOXC1;FOXJ1;FOXJ3;FOXK1;FOXK2;FOXN1;FOXP1;FOXP4;FUBP1;G3BP1;GABPB2;GAR1;GATA3;GCN1L1;GEMIN5;GFM1;GMEB2;GON4L;GPANK1;GPATCH1;GPATCH4;GPA  
AD;BAG3;BAH1;BATF;BATF3;BAZ1B;BBS2;BCL10;BCL11B;BCL2;BCL9L;BDH1;BEX1;BICD1;BIRC6;BLM;BLMH;BLOC1S1;BMP2;BPTF;BRD1;BRD2;BRD7;BRPF1;BRSK2;BTRC;C14orf169;C1D;C1GALT1C1;C22orf28;C2CD3;CAD;CALM3;CALR;CAMTA2;

;CACNA1I;CAD;CADM1;CALM3;CALR;CAMP;CAMSAP1;CAMTA2;CAND2;CAPN2;CAPN3;CARD11;CARD14;CASP1;CASP10;CASP2;CATSPER1;CATSPER2;CBFA2T2;CBLB;CBX2;CBX5;CBX7;CCAR1;CCDC141;CCDC64;CCDC88C;CCL8;CCND1;CCND2  
T3A;DPH1;DRG1;DROSHA;DVL2;EARS2;ECD;EDC3;EDC4;EEF2;EEF2K;EFTUD2;EHMT1;EIF2AK3;EIF2AK4;EIF2B1;EIF2S3;EIF3A;EIF3B;EIF4A3;EIF4B;EIF4G1;EIF4G2;EIF5A;EIF5B;ELAVL1;ELP3;EPHX2;EPRS;ERCC3;ETS;  
;SRRM1;SRRM2;SRRT;SRSF5;SUGP2;SUPV3L1;SYF2;TARDBP;TFIP11;TGS1;THOC1;THOC2;TNKS1BP1;TRIT1;TSR2;TYW1;U2AF1L4;U2AF2;USP39;UTP14A;UTP20;WBP11;WDR33;WDR4;WDR55;ZCCHC11;ZI

T8;CD3E;CD3EAP;CD4;CD40LG;CD74;CDAN1;CDC16;CDC25B;CDC42BPA;CDC42BPB;CDC42BPG;CDH13;CDK5RAP2;CDKAL1;CDKN2A;CDKN2B;CDON;CELFI1;CELSR2;CENPN;CENPO;CEP164;CHCHD3;CHD1L;CHD2;CHD3;CHD4;CHD6;CHEK2;CHN  
3ED6;ZBTB9;ZCCHC11;ZHX3;ZNF330;ZN  
YYNLT1;EDC3;EDC4;EFCAB4B;EHMT1;EIF2AK4;EIF3A;ELP3;EMD;EML3;EPB41L2;EPHX2;EPPK1;EPS8;EVL;EXOC7;EXOSC10;EZR;FAM110B;FBF1;FEN1;FGD1;FKBP4;FLNA;FLNB;FLNC;FNBP1;FOXCI;FOXX1;FRMD4A;FSCN2;FTSJ2;F  
YYNLT1;EDC3;EDC4;EFCAB4B;EHMT1;EIF2AK4;EIF3A;ELP3;EMD;EML3;EPB41L2;EPHX2;EPPK1;EPS8;EVL;EXOC7;EXOSC10;EZR;FAM110B;FBF1;FEN1;FGD1;FKBP4;FLNA;FLNB;FLNC;FNBP1;FOXCI;FOXX1;FRMD4A;FSCN2;FTSJ2;F

J5C10;EZH1;FADS1;FAM103A1;FARSB;FEN1;FGF2;FGFR1;FIP1L1;FLNA;FOSB;FOXC1;FOXJ1;FOXJ3;FOXK1;FOXK2;FOXN1;FOXP1;FOXP4;FTSJ2;FTSJ3;FUBP1;GABPB2;GAR1;GARS;GATA3;GEMIN4;GEMIN5;GMEB2;  
I;ASXL1;ATF6B;ATG10;ATG13;ATG14;ATG3;ATG9B;ATIC;ATM;ATN1;ATOX1;ATP10A;ATP1A1;ATP1A3;ATP1B3;ATP2A2;ATP2A3;ATPSA1;ATPSB;ATPSJ;ATPSJ2;ATP6VOE1;ATP6V1D;ATP6V1F;ATP6V1H;ATP8B1;ATP8B2;ATP9B;ATXN1L;ATXN2L;AVPR2;AXIN  
;AK4;EIF2B1;EIF2S3;EIF3A;EIF3B;EIF4A3;EIF4B;EIF4ENIF1;EIF4G1;EIF4G2;EIF5A;EIF5B;ELAVL1;ENO2;ENOX2;EPHX2;EPRS;EVL;EXOC7;EZR;FAF1;FARSB;FASN;FGD1;FGF2;FGFR1;FHL1;FKBP4;FLNA;FLNB;FLNC;FXN;FYN;FZR1;G3B  
I26;RBM28;RBM33;RBM4B;RBM6;RCAN3;RNASEH1;RNMT;RNPS1;RPL21;RPP14;RSL1D1;SARS;SART3;SCAF1;SCAF4;SCAF8;SECISBP2;SETD1A;SF1;SFPQ;SLC4A1AP;SLTM;SNRNP70;SON;SRBD1;SRP68;SRRM1;SRRM2;SRSF5;SUGP2;SUP1

;MAPK9;MARS;MAVS;MCCC1;MCCC2;MCCD1;MGST1;MIPEP;MLXIP;MMACHC;MMADHC;MRPL16;MRPL3;MRPL44;MRPL49;MRPS24;MRPS27;MRPS36;MRP55;MRP59;MSRB2;MSRB3;MTCH2;MTHFD1;MTHFD1L;MTOR;MTPAP;MUL1;MY  
V2;FKBP4;FLNA;FLNB;FMNL3;FOXJ1;FOXP1;FSCN2;FXN;FZR1;GADD45A;GATA3;GBF1;GFM1;GORASP2;GRID2IP;GRPEL1;GTF3C4;H3F3C;HAU5;HCF1;HDAC1;HGF;HIST1H2AC;HIST1H2AK;HIST1H2BN;HIST2H2AC;HIST2H2BE;HIST

RBBP4;RBBP7;RBM14;RFC1;RFWD3;RNASEH1;RNF8;RPA1;RPA2;RRM1;RUVBL1;SFPQ;SH2B1;SHC1;SLX4;SMARCAL1;SMC1A;SMG6;SSRP1;SUPT16H;SUPV3L1;TCF3;TCF7;TCF7L2;TDP1;TEP1;TERF2;TERF2IP;TNFAIP1;TNKS1BP1;TOP2B;TP5  
I30;ZM  
;TAF10;TCF3;TCF7L2;TEP1;TERF2;TERF2IP;TNKS1BP1;TOP2B;TP53;TRIM16;TRRAP;TSPYL2;TTF1;UBE2B;UHRF1;XPC;XRCC5;XRCC6;YEATS2;YLP1M1;ZI

I;SARM1;SEPT6;SERPINB6;SF1;SPECC1L;SPTAN1;STARD9;STIM1;TADA2A;TBCC;TBCCD1;TCHP;TCP1;TCP11L1;TCTN2;TIMM17B;TMEM216;TPPP;TRIP4;TSPYL2;TTLL3;TTLL5;TUBA3D;TUBB;TUBGCP4;TUBGCP5;TUBGCP6;WDR67;

;RBBP4;RFC1;RHOF;RUVBL1;SMARCA4;SMARCAL1;SMC1A;SNRNP200;SPATA5;SPG7;SRCAF;STARD9;SUPV3L1;TBCC;THTPA;TOP2B;TUBA3D;TUBB;VCP;WRNIP1;XRCC3;XRCC5;

;PEX5;PHACTR4;PHRF1;PIK3IP1;PKD1;PLSCR4;POLB;POLG;PPARA;PPME1;PPP1R16B;PPP1R9B;PRC1;PRKAG1;PRKCA;PRKCH;PTK2;RAB11FIP3;RAB3GAP1;RACGAP1;RAD18;RAD54L2;RANBP10;RBBP4;RELA;RNF20;RNF8;RPA2;RPRD1B;RRN  
2;BDH1;BET1L;BICD1;BID;BIK;BIRC6;BLMH;BLOC1S1;BR13BP;BRSK2;BTBD2;BTRC;C12orf39;C15orf48;C15orf62;C1D;C1GALT1C1;C22orf29;C2CD2;C9orf89;CABP4;CACNB1;CAD;CADM1;CALM3;CALR;CAMP;CAPN3;CARD11;CASP1;CASP10;C  
BL2A;RABL2B;RAD5D;RAD54L2;RBBP4;RFC1;RHOF;RUVBL1;SLC25A42;SMARCA4;SMARCAL1;SMC1A;SNRNP200;SPATA5;SPG7;SRCAF;STARD9;SUPV3L1;TBCC;THTPA;TOP2B;TUBA3D;TUBB;VCP;WRNIP1;XRCC3;XRCC5;  
1A;RABL2A;RABL2B;RAD5D;RAD54L2;RBBP4;RFC1;RHOF;RUVBL1;SLC25A42;SMARCA4;SMARCAL1;SMC1A;SNRNP200;SPATA5;SPG7;SRCAF;STARD9;SUPV3L1;TBCC;THTPA;TOP2B;TUBA3D;TUBB;VCP;WRNIP1;XRCC3;XRCC5;  
BL2A;RABL2B;RAD5D;RAD54L2;RBBP4;RFC1;RHOF;RUVBL1;SLC25A42;SMARCA4;SMARCAL1;SMC1A;SNRNP200;SPATA5;SPG7;SRCAF;STARD9;SUPV3L1;TBCC;THTPA;TOP2B;TUBA3D;TUBB;VCP;WRNIP1;XRCC3;XRCC5;  
ISH6;MTA3;MYBBP1A;MYC;NASP;NCAPD2;NCAPD3;NCAPG;NCAPG2;NDC80;NEK9;NINL;NME6;NOLC1;NSUN2;NUMA1;NUP133;NUP214;ODF2;PA2G4;PADP7;PAR6A;PCM1;PCNT;PDCD4;PHACTR4;PHF13;PIM3;PINX1;PKD1;PLD6;PMS2;PMS2P5;PI

;ELAVL1;ELP3;ENTPD5;EPRS;ERCC3;ETS1;EXT2;EZH1;FADS1;FARSB;FEN1;FGF2;FGFR1;FKRP;FLNA;FOSB;FOXC1;FOXJ1;FOXJ3;FOXK1;FOXK2;FOXN1;FOXP1;FOXP4;FUBP1;FUT11;FUT2;GABPB2;GAL3S

A42;SLC25A45;SMAD3;SMCR7L;SNPH;SOX10;SPG7;STAR;SUN2;SYNE1;SYNE2;TAMM41;TEX10;THEM4;TIMM17B;TMEM109;TMEM57;TNPO2;TOMM34;TUBB;TXLNG;VAMP1;VAT1;VDAC1;VDAC2;WDR3;WHSC1;  
;RY2;CSNK2A2;CSRNP2;CSTF1;CSTF2;CSTF3;CTC1;CTCF;CTPS2;CTR9;CYTL1;DAD1;DARS2;DBH;DCN;DCTD;DDIT3;DDX17;DDX20;DHCR24;DHCR7;DHDDS;DHODH;DHX33;DHX38;DIDO1;DKC1;DLD;DNAJA3;DNAJC1;DNMT1;DNMT3A;I

EIF4A3;EIF4B;EIF4G1;EIF4G2;EIF5A;EIF5B;ELAVL1;ELP3;ENTPD5;EPRS;ERCC3;ETS1;EXT2;EZH1;F2;FADS1;FARSB;FEN1;FGF2;FGFR1;FKRP;FLNA;FOSB;FOXC1;FOXJ1;FOXJ3;FOXK1;FOXK2;FOXN1;FOXP1;  
7;SLC25A42;SLC25A45;SMAD3;SMCR7L;SNPH;SOX10;SPG7;STAR;SUN2;SYNE1;SYNE2;TAMM41;TEX10;THEM4;TIMM17B;TMEM109;TMEM57;TNPO2;TOMM34;TUBB;TXLNG;VAMP1;VAT1;VDAC1;VDAC2;WDR3;WHSC1;

TADA2A;TAF1;TCF3;TFDP2;TIMELESS;TNF;TOP2B;TP53;TRIM35;TRRAP;TUBB;TUBGCP4;TUBGCP5;TUBGCP6;UBE2I;UBE2L3;YWHAE;ZC3H12D;ZW  
;A2;CSRNP2;CSTF1;CSTF2;CSTF3;CTC1;CTCF;CTPS2;CTR9;CYTL1;DAD1;DARS2;DBH;DCN;DCTD;DDIT3;DDX17;DDX20;DHDDS;DHODH;DHX33;DHX38;DIDO1;DKC1;DLD;DNAJA3;DNAJC1;DNMT1;DNMT3A;DPH1;DRD4;DRG1;DTL;DUI



;POLE;PPP1R9B;PPP2R5C;PRC1;PRKAG1;PRMT2;PSM4;PSMD1;PSMD11;PSMD2;PSMD6;PSMD7;PSME4;RACGAP1;RAD51D;RBL2;RCC2;RFC1;RFWD3;RNF4;RNF8;RPA1;RPA2;RPRD1B;RPS6KA2;RUVBL1;SEH1L;SF1;SF1;SH2B1;SMAD3;SMARCA4;SMRT1;CRTC3;CRY2;CSNK2A2;CSRNP2;CSTF1;CSTF2;CSTF3;CTC1;CTCF;CTPS2;CTRP;CYTL1;DAD1;DARS2;DBH;DCN;DCTD;DDIT3;DDX17;DDX20;DHC24;DHC7;DHDD5;DHODH;DHX33;DHX38;DIDO1;DKC1;DLD;DNAJA3;DNAJC1;DNN

2;CHD3;CHD4;CHD6;CHEK2;CHST12;CIITA;CIT;CIZ1;CKM;CLCN3;CLCN6;CLEC3B;CLK2;CLPB;CLSTN1;CNDP2;COL27A1;COL5A1;COX5B;CPSF3;CRB2;CREG1;CSNK1E;CSNK2A2;CTCF;CTPS2;CUBN;CUL9;CXXC5;CYB561D1;CYB5B;CYP20A1;(

I4;TIMM17B;TOMM34;TP53;VAMP1;VAT1;VDAC1;VDUSP7;DVL2;DYX1C1;ECD;EDEM1;EEF2K;EHD4;EHMT1;EIF2AK3;EIF2AK4;EIF2B1;EIF3B;EIF4A3;EIF4B;EIF4G1;EIF4G2;EIF5A;EIF5B;ELAVL1;ELP3;EPA1;EPHX2;EPRS;ERBB3;ERCC3;ETS1;EXOSC10;EZH1;F12;F2;FADS1;FA;CECR1;CERK;CES2;CHD1L;CHD2;CHD3;CHD4;CHD6;CHEK2;CHST12;CIT;CKM;CLK2;CLPB;CMBL;CNDP2;COX10;COX15;COX5B;COX8A;CPSF3;CREG1;CSNK1E;CSNK2A2;CSRNP2BP;CTPS2;CYB5RL;CYP20A1;CYP2D6;D2HGDH;DAD1;DAGLA;DARS2;

;CEP164;CEP72;CHAD;CHCHD3;CHD1L;CHD3;CHD4;CHD6;CHEK2;CHMP4C;CHMP5;CHMP7;CIAO1;CIRBP;CIT;CKAP5;CLCN3;CLDN15;CLDN20;CLN8;CNTNAP1;COG1;COG2;COL17A1;COL27A1;COL5A1;COL6A3;CORO2A;COX10;COX15;CROCC;X1;LIG3;LMO2;LOC100133315;LONP2;MAFK;MBD1;MBD2;MCM2;MCM3;MCM3AP;MCM4;MCM6;MECP2;MED6;MEIS2;MGA;MKL1;MLH1;MLL;MLL4;MLXIP;MND1;MNT;MSH6;MTA1;MTA2;MTA3;MTOR;MXD3;MYBBP1A;MYC;MYO18A;NCL;NCOR

OXK1;FOXK2;FOXM1;FOXP1;FOXP4;FUBP1;FXN;GABBR1;GABPB2;GARS;GART;GATA3;GIPR;GMEB2;GMPS;GON4L;GPHN;GRM2;GTF2A2;GTF3C1;GTF3C2;GTF3C4;HABP4;HCFC1;HDAC1;HELB;HEXIM1;HGF;HHEX;HIC2;HIF1AN;

2B1;SMARCA4;SMC1A;STARD9;SUN2;SYCE2;TADA2A;TAF1;TCF3;TFDP2;TIMELESS;TNF;TOP2B;TP53;TUBB;TUBGCP4;TUBGCP5;TUBGCP6;UBE2B;UBE2I;UBE2L3;YWHAE;ZC3H12D;ZNF318;ZV;GMEB2;GON4L;GOSR2;GRM2;GTF2A2;GTPBP4;HABP4;HCFC1;HDAC1;HEXIM1;HGF;HHEX;HIC2;HIF1AN;HMG20A;HMGA1;HNRNPA2B1;HNRNPAB;HNRNPH1;HSBP1;HSP90B1;HSPA8;HTATIP2;HTATS1;HYAL2;HYOU1;ID1;IKBKAP;IKBKB

IA;FOSB;FOXC1;FOX11;FOX1;FOX13;FOXK1;FOXK2;FOXM1;FOXP1;FOXP4;FUBP1;FXN;GABBR1;GABPB2;GARS;GART;GATA3;GGT7;GIPR;GMEB2;GMPS;GON4L;GOT1;GRM2;GTF2A2;GTF3C1;GTF3C2;GTF3C4;HABP4;HCFC1;HDAC1;UT2;FYN;FZR1;GABARAPL2;GALT;GFM1;GKS;GLUD1;GNG10;GNL2;GNL3;GNPDA1;GOT1;GOT2;GPC2;GPT;GPT2;GRIN2C;GSTM4;GSTO1;GTPBP4;H6PD;HACL1;HADH;HADHA;HADHB;HECTD1;HERC2;HKDC1;HPD;HRASLS2;HSP90A1;HSP90

JC1;DNMT1;DNMT3A;DOCK7;DRD4;DUSP16;DUSP7;DVL2;DYX1C1;ECD;EDEM1;EEF2K;EHD4;EHMT1;EIF2AK3;EIF2AK4;EIF2B1;EIF3B;EIF4A3;EIF4B;EIF4G1;EIF4G2;EIF5A;EIF5B;ELAVL1;ELP3;EPA1;EPA2;EPHX2;EPRS;ERBB3;

3P1;HSPA8;HTATIP2;HTATS1;HYAL2;ID1;IKBKAP;IKBKB;IKZF3;IL10;IL16;IL26;IL31RA;IL4;ILF2;ILF3;ING1;ING2;ING5;INO80;IRAK1;IRF8;ITGA6;IWS1;JAZF1;KANK1;KAT6B;KCTD1;KDM1A;KDM2B;KDM4A;KDM4C;KDM5

IFR1;FLNA;FOSB;FOXC1;FOX11;FOX1;FOX13;FOXK1;FOXK2;FOXM1;FOXP1;FOXP4;FUBP1;FXN;GABBR1;GABPB2;GARS;GART;GATA3;GIPR;GMEB2;GMPS;GON4L;GPHN;GRM2;GTF2A2;GTF3C1;GTF3C2;GTF3C4;HABP4;HCFC1;HDA

FOXK2;FOXM1;FOXP1;FOXP4;FUBP1;FXN;GABBR1;GABPB2;GARS;GART;GATA3;GIPR;GMEB2;GMPS;GON4L;GRM2;GTF2A2;GTF3C1;GTF3C2;GTF3C4;HABP4;HCFC1;HDAC1;HELB;HEXIM1;HGF;HHEX;HIC2;HIF1AN;HMG20A;HMC

.G1;GMEB2;GON4L;GTF2A2;GTPBP4;HABP4;HCFC1;HDAC1;HEMK1;HEXIM1;HGF;HHEX;HIC2;HIF1AN;HMG20A;HMGA1;HNRNPA0;HNRNPA2B1;HNRNPAB;HNRNPH1;HNRNPU;HPS4;HSBP1;HSPA8;HSPD1;HTATIP2;HTATSF1;

IP2;CSTB;CTC1;CTCF;CTR9;CUL1;CUL4A;CUL7;CXCL1;CYP2D6;CYTL1;DCTN1;DDIT3;DDIT4;DDX17;DDX20;DHCR24;DHCR7;DHX33;DHX9;DLD;DLG3;DNAJA3;DNAJC1;DNMT1;DNMT3A;DOCK7;DRD4;DROSHA;DUSP16;DUSP7;DVL2;DYX1C  
GMEB2;GON4L;GOSR2;GRM2;GTF2A2;GTPBP4;HABP4;HCFC1;HDAC1;HEXIM1;HGF;HHEX;HIC2;HIF1AN;HMG20A;HMGA1;HNRNPA2B1;HNRNPAB;HNRNPH1;HSBP1;HSP90AB1;HSP90B1;HSPA8;HTATIP2;HTATSF1;HYAL2;HYOU1;ID1;IKBK

14;GSTO1;GTPBP4;HACL1;HADH;HADHA;HADHB;HECTD1;HERC2;HPD;HSP90AB1;HSP90B1;HSPD1;HTRA2;HUWE1;HYAL1;IBA57;IL10;INO80;IRGM;IRS1;IVD;KCTD10;KCTD13;KIAA0226;KIAA0368;KIF16B;KYNU;LARP1;LONP2;LPIN1;

BP1;GABBR1;GABPB2;GARS;GART;GATA3;GIPR;GMEB2;GMPS;GON4L;GRM2;GTF2A2;GTF3C1;GTF3C2;GTF3C4;HABP4;HCFC1;HDAC1;HELB;HEXIM1;HGF;HHEX;HIC2;HIF1AN;HMG20A;HMGA1;HNRNPAB;HOMEZ;HOXA9;HOXB2;

2;SUFU;SUPT4H1;TAF3;TARDBP;TCF7L2;TERF2;TERF2IP;TFCP2L1;TGIF2;THRA;TIMELESS;TLE1;TNF;TP53;TSPYL2;TTF1;TXN;U2AF2;UBE2B;UBE2I;UHRF1;VHL;WHSC1;XRCC5;XRCC6;YEATS2;ZBED6;ZBTB16;ZBTB7A;ZHX2;ZHX3;ZMYND8;

NO80;INPPL1;IRAK1;ISCA2;ITGA6;ITPR3;KANK1;KAT6B;KCNA6;KCNC4;KCTD1;KCTD10;KCTD13;KCTD5;KIF3B;KNTC1;KRT5;LAS1;LDB1;LPXN;LRRC16A;LRRC4B;LSG1;MACF1;MAPT;MBD2;MCM2;MDM4;MDN1;MECP2;MED24;

;WDR6;XPC;ZC3H12D;ZV

IA3;DNAJC1;DNMT1;DNMT3A;DOCK7;DRD4;DUSP16;DUSP7;DVL2;DYX1C1;ECD;EDEM1;EEF2K;EHD4;EHMT1;EIF2AK3;EIF2AK4;EIF2B1;EIF3B;EIF4A3;EIF4B;EIF4G1;EIF4G2;EIF5A;EIF5B;ELAVL1;ELFN2;ELP3;EPHA1;EPHA2;EPR

'AB;HSBP1;HSPA8;HTATIP2;HTATSF1;HYAL2;ID1;IKBKAP;IKKBK;IKZF3;IL10;IL16;IL26;IL31RA;IL4;ILF2;ILF3;ING1;ING2;ING5;INO80;INPPL1;IRAK1;IRF8;IRS1;ITGA6;JAZF1;KANK1;KAT6B;KCTD1;KCTD13;KI

PC2;GPT;GPT2;GRIN2C;GTPBP4;H6PD;HACL1;HADH;HADHA;HADHB;HECTD1;HERC2;HKDC1;HPD;HRASL2;HSP90AB1;HSP90B1;HSPD1;HSPG2;HTRA2;HUWE1;HYAL1;HYAL2;IBA57;IL10;INO80;INPP5E;IRS1;IVD;KCTD10;KCTD13;KIAA

20A;HMGA1;HNRNPAB;HSBP1;HSPA8;HSPH1;HTATIP2;HTATSF1;HYAL2;ID1;IKBKAP;IKKBK;IKZF3;IL10;IL16;IL18;IL26;IL27;IL31RA;IL4;ILF2;ILF3;ING1;ING2;ING5;INO80;INPPL1;IRAK1;IRF8;IRS1;ITGA

REBF2;SUFU;SUPT4H1;TAF3;TARDBP;TCF7L2;TERF2;TERF2IP;TFCP2L1;TGIF2;THRA;TIMELESS;TLE1;TNF;TP53;TSPYL2;TTF1;TXN;U2AF2;UBE2B;UBE2I;UHRF1;VHL;WHSC1;XRCC5;XRCC6;YEATS2;ZBED6;ZBTB16;ZBTB7A;ZHX2;ZHX3;ZMY

;MAP2K6;MAP2K7;MAP3K9;MAPK7;MAPK9;MAPT;MCF2L;MDM4;MECP2;MKL1;MLH1;MLL;MNT;MSH6;MUL1;MYBBP1A;MYC;MYO18A;NACC1;NCKAP1L;NDUFS1;NET1;NISCH;NLRP1;NME6;NMT1;NOD1;NODAL;NRBP2;NRG1;N

164;CEP72;CHAD;CHCHD3;CHD1L;CHD3;CHD4;CHD6;CHEK2;CHMP4C;CHMP5;CHMP7;CIAO1;CIRBP;CIT;CKAP5;CLCN3;CLDN15;CLDN20;CLN8;CNTNAP1;COG1;COG2;COL17A1;COL27A1;COL5A1;COL6A3;CORO2A;COX10;COX15;CROCC;CRTC

AGED1;MAP2K6;MAP2K7;MAP3K9;MAPK7;MAPK9;MAPT;MCF2L;MDM4;MECP2;MKL1;MLH1;MLL;MNT;MSH6;MUL1;MYBBP1A;MYC;MYO18A;NACC1;NCKAP1L;NDUFS1;NET1;NISCH;NLRP1;NME6;NMT1;NOD1;NODAL;NRBP2;

'7L2;TERF2;TFCP2L1;TGIF2;THRA;TIMELESS;TLE1;TNF;TNRC6A;TP53;TSC1;TSPYL2;TTF1;TXN;UBE2B;UBE2I;UHRF1;VHL;WHSC1;XRCC5;XRCC6;YEATS2;ZBED6;ZBTB16;ZBTB7A;ZHX2;ZHX3;ZMYND8;ZNF263;ZNF496;

M2C;JTB;KALRN;KDM1A;KDM2B;KIAA0141;KITLG;KLF11;LCK;LEF1;LGMN;LHX4;MADD;MAGED1;MAP2K6;MAP2K7;MAP3K9;MAPK7;MAPK9;MAPT;MCF2L;MDM4;MECP2;MKL1;MLH1;MLL;MNT;MSH6;MTPAP;MUL1;MYBB  
;MBOAT4;MED24;METTL13;METTL16;METTL2A;METTL2B;METTL7A;METTL7B;MGAT5;MGST1;MINK1;MLL;MLL4;MPP2;MTOR;MTPAP;MTR;MYBBP1A;NAA40;NAT10;NAT8L;NDUFA10;NEK9;NFS1;NME6;NMT1;NMT2;NOL9;NSUN2;NSUN4;  
M2C;JTB;KALRN;KDM1A;KDM2B;KIAA0141;KITLG;KLF11;LCK;LEF1;LGMN;LHX4;MADD;MAGED1;MAP2K6;MAP2K7;MAP3K9;MAPK7;MAPK9;MAPT;MCF2L;MDM4;MECP2;MKL1;MLH1;MLL;MNT;MSH6;MTPAP;MUL1;MYBB  
SUFU;SUPT4H1;TAF3;TARDBP;TCF7L2;TERF2;TFCP2L1;TGIF2;THRA;TIMELESS;TLE1;TNF;TNRC6A;TP53;TSC1;TSPYL2;TTF1;TXN;UBE2B;UBE2I;UHRF1;VHL;WHSC1;XRCC5;XRCC6;YEATS2;ZBED6;ZBTB16;ZBTB7A;ZHX2;ZHX3;ZMYI  
32;HSBP1;HSPA8;HTATIP2;HTATSF1;HYAL2;ID1;IKBKAP;IKBKB;IKZF3;IL10;IL16;IL26;IL31RA;IL4;ILF2;ILF3;ING1;ING2;INGS;INO80;IRAK1;IRF8;ITGA6;IWS1;JAZF1;KANK1;KAT6B;KCTD1;KDM1A;KDM2B;KDM4A;KDM4C

;SHPK;SIK1;SIK2;SRPK3;STK16;STK38;STK39;TAF1;TAOK2;TEP1;TNIK;TNK2;TRIO;TRRAP;TSSK3;TSSK4;TXK;TYK2;UCK2;ULK2;ZCCH  
MD1;PSMD11;PSMD2;PSMD6;PSMD7;PSME4;PTK2;RAB3GAP1;RABGAP1;RACGAP1;RAP1GDS1;RAPGEF1;RASA3;RASA4;RASAL3;RELA;RFC1;RGS13;RGS17;RYR2;S100A12;S100A8;S100A9;SAE1;SCRIB;SERINC5;SGK1;SHC1;SLX4;SMAD3;SM/

VGS;INO80;IRAK1;IRF8;ITGA6;JAZF1;KANK1;KAT6B;KCTD1;KDM1A;KDM2B;KDM4A;KDM4C;KDM5C;KHDRBS1;KHSRP;KLF11;KLHL31;KRBA2;L3MBTL1;L3MBTL2;LANCL2;LBH;LDB1;LEF1;LEO1;LMO2;LPIN1;LPXN;LRP5  
C;POLR2J;PPARGC1B;PPP2R5C;PRPF19;PSMC4;PSMD1;PSMD11;PSMD2;PSMD6;PSMD7;PSME4;PTK2;RAD18;RAD51D;RBBP7;RBM14;RFC1;RFWD3;RHBDD1;RNF8;RPA1;RPA2;RPS6KA2;RUVBL1;SCAMP5;SEMA4C;SFPQ;SFRP5;SGK1;SHC1;SL  
RM2;GTF2A2;GTPBP4;HABP4;HCFC1;HDAC1;HEXIM1;HGF;HHEX;HIC2;HIF1AN;HMG20A;HMGA1;HNRNPAB;HSBP1;HSP90AB1;HSPA8;HSPH1;HTATIP2;HTATSF1;HYAL2;ID1;IKBKAP;IKBKB;IKZF3;IL10;IL16;IL18;IL  
;PARP1;PASK;PATZ1;PDCD4;PDPK1;PER1;PLAT;PPARA;PPARD;PPARGC1B;PRKCA;PRMT2;PSMC4;PSMD1;PSMD11;PSMD2;PSMD6;PSMD7;PTBP1;RAD18;RAMP3;RBBP7;RBF2;RELA;RFX5;RNF8;RREB1;RUNX2;RUNX3;SALL2;SAP30;SAT  
F2;UBE2B;UBE2I;UHRF1;VHL;WHSC1;XRCC5;XRCC6;YEATS2;ZBED6;ZBTB16;ZBTB7A;ZHX2;ZHX3;ZMYND8;ZNF263;ZNF496;Z

LA;SNW1;SNX6;SOX10;SOX18;SREBF2;SUFU;SUPT4H1;TAF3;TARDBP;TCF7L2;TERF2;TFCP2L1;TGIF2;THRA;TIMELESS;TLE1;TNF;TNRC6A;TP53;TSC1;TSPYL2;TTF1;TXN;UBE2B;UBE2I;UHRF1;VHL;WHSC1;XRCC5;XRCC6;YEATS2;ZBE

;TNF;TNRC6A;TNRC6C;TNRC6E;TP53;TXN;UBE2B;UBE2I;UHRF1;VHL;WHSC1;XPO5;XRCC5;XRCC6;YEATS2;ZBED6;ZBTB16;ZBTB7A;ZCCHC11;ZHX2;ZHX3;ZMYND8;ZNF263;ZNF496;Z  
A2;GTPBP4;HABP4;HCFC1;HDAC1;HEXIM1;HGF;HHEX;HIC2;HIF1AN;HMG20A;HMGA1;HNRNPAB;HSBP1;HSP90AB1;HSPA8;HTATIP2;HTATSF1;HYAL2;ID1;IKBKAP;IKBKB;IKZF3;IL10;IL16;IL26;IL27;IL31RA;IL4;I

VAB2;NACC1;NCOR2;NF2;NFX1;NKAP;NODAL;NR1D1;NRBP2;NRG1;NRIP2;NXN;PA2G4;PABPC1;PARP1;PASK;PATZ1;PDCD4;PDPK1;PER1;PIK3IP1;PLAT;PPARA;PPARD;PPARGC1B;PRKCA;PRMT2;PSMC4;PSMD1;PSMD11;PSMD2;PSMD6;PSKANK1;KAT6B;KCTD1;KDM1A;KDM2B;KDM4A;KDM4C;KDM5C;KHDRBS1;KHSRP;KLF11;KLHL31;KRBA2;L3MBTL1;L3MBTL2;LANCL2;LBH;LDB1;LEF1;LEO1;LMO2;LPIN1;LPXN;LRP5;LRP8;LZTR1;MAD2L2;MAGED1;MAMYEATS2;ZBED6;ZBTB16;ZBTB7A;ZHX2;ZHX3;ZMYND8;ZNF263;ZNF496;Z1;SMC1A;SNW1;SNX6;SOX10;SOX18;SREBF2;SUFU;SUPT4H1;TAF3;TARDBP;TCF7L2;TERF2;TFCP2L1;TGIF2;THRA;TIMELESS;TLE1;TNF;TNRC6A;TP53;TSC1;TSPYL2;TTF1;TXN;UBE2B;UBE2I;UHRF1;VHL;WHSC1;XRCC5;XRCC6;YEAT

1;KY;LANCL2;LCK;LDLRAP1;LMOD3;LPXN;LZTS2;MACF1;MAD2L1BP;MAD2L2;MAP1A;MAP1LC3B2;MAP2K6;MAP4;MAP7D3;MAPRE2;MAPT;MCM3;MID2;MINK1;MMS19;MNS1;MPRIIP;MYC;MYCBP;MYCBP2;MYH3;MYH7B;MYO:

!;NCAPG;NEFH;NEIL2;NEURL4;NF2;NICN1;NINL;NPHP4;NSUN2;NUMA1;NUP62;ODF2;PCIF1;PCM1;PCNT;PDE4DIP;PEA15;PINX1;PLEKHA7;PNN;POLB;PRC1;PRPF19;PTK2;RAB11FIP3;RAB3GAP1;RABGAP1;RACGAP1;RANBP10;RCC2;RP1L1;

KANK1;KAT6B;KCTD1;KDM1A;KDM2B;KDM4A;KDM4C;KDM5C;KHDRBS1;KHSRP;KLF11;KLHL31;KRBA2;L3MBTL1;L3MBTL2;LANCL2;LBH;LDB1;LEF1;LEO1;LMO2;LPIN1;LPXN;LRP5;LRP8;LZTR1;MAD2L2;MAGED1;MAM

PARP1;PAXIP1;PER1;PHRF1;PKD1;POLA1;POLR2B;POLR2C;POLR2J;PPARA;PPARD;PPARGC1B;PRDM4;RAI1;RBBP7;RBM14;RELA;RFX5;RGMB;RNF4;RNMT;RNPS1;RPRD1B;RREB1;RUNX1;RUNX2;RUNX3;RUVBL1;RYR2;SALL2;SAP30;S7;RYR2;S100A12;S100A8;S100A9;SAE1;SCRIB;SERINC5;SHC1;SLX4;SMAD3;SNX9;SYDE1;SYNGAP1;SYVN1;TAOK2;TATDN2;TAX1BP3;TBC1D7;TNF;TNFRSF10A;TNFRSF11A;TNK1;TSC1;TSPYL2;TXK;UHRF1;VANGL2;VAV2;VCP;X

3OSR2;GOT2;GPR89B;GPRC5C;GRAMD4;GSTM4;GTPBP4;GUCY2D;HADHA;HADHB;HERC2;HHAT;HLA-DRB1;HSP90B1;HSPA8;HSPD1;HTRA2;HTT;HYAL2;ICMT;IKBIP;IKBKE;IMMT;INPP5B;INPP5E;INTS1;IRAK1;IRGM;ITM2C;ITPR3;JPH3;KDI

!A;TPRN;TRADD;UACA;UCN;UGP2;USF2;USP33;UTF1;VAPB;WNT6;YF1A;ZDHC1;ZDHC24;ZFPM1;ZNF219;ZNF35;ZNF358;ZNF414;ZNF428;ZNF444;ZNF564;ZNF575;ZNF579;ZNF628;ZNF638;ZNF668;ZNF747;ZNF764;ZNF771;ZNI
