# Supplementary material for: Meditation and vacation effects have an impact on disease-associated molecular phenotypes
Source: PubMed Central journal article supplement (PMC5022094; doi:10.1038/tp.2016.164), 2016-08-30
Supplement: tp2016164x5.pdf [file tp2016164x5.pdf]

**Supplementary Table 6.** Gene sets from the MsigDB database enriched for the coexpression network modules identified in Supplementary Table 4.

| module     | set_idx | set_description                              | overlap | red balls | black balls | sample size | fold_enrich | pv |
|------------|---------|----------------------------------------------|---------|-----------|-------------|-------------|-------------|----|
| blue       | 8430    | GSE10325_LUPUS_CD4_TCELL_VS_LUPUS_MYELOID_U  | 88      | 195       | 16058       | 2978        | 2.462957    | 0  |
| blue       | 9362    | GSE22886_NAIVE_TCELL_VS_MONOCYTE_UP          | 88      | 196       | 16057       | 2978        | 2.450391    | 0  |
| brown      | 8431    | GSE10325_LUPUS_CD4_TCELL_VS_LUPUS_MYELOID_DI | 88      | 200       | 16053       | 2190        | 3.265443    | 0  |
| brown      | 8433    | GSE10325_LUPUS_BCELL_VS_LUPUS_MYELOID_DN     | 91      | 200       | 16053       | 2190        | 3.376765    | 0  |
| brown      | 9375    | GSE22886_NAIVE_CD8_TCELL_VS_MONOCYTE_DN      | 81      | 199       | 16054       | 2190        | 3.020796    | 0  |
| brown      | 9655    | GSE29618_BCELL_VS_MONOCYTE_DN                | 79      | 199       | 16054       | 2190        | 2.946208    | 0  |
| brown      | 9667    | GSE29618_BCELL_VS_MONOCYTE_DAY7_FLU_VACCINE  | 79      | 198       | 16055       | 2190        | 2.961088    | 0  |
| brown      | 9672    | GSE29618_MONOCYTE_VS_PDC_DAY7_FLU_VACCINE_   | 76      | 200       | 16053       | 2190        | 2.820155    | 0  |
| brown      | 9674    | GSE29618_MONOCYTE_VS_MDC_DAY7_FLU_VACCINE_   | 75      | 200       | 16053       | 2190        | 2.783048    | 0  |
| cyan       | 6178    | SANA_RESPONSE_TO_IFNG_UP                     | 18      | 70        | 16183       | 77          | 54.27718    | 0  |
| cyan       | 8573    | GSE13484_UNSTIM_VS_YF17D_VACCINE_STIM_PBMC_  | 23      | 190       | 16063       | 77          | 25.55154    | 0  |
| cyan       | 8579    | GSE13485_CTRL_VS_DAY7_YF17D_VACCINE_PBMC_DN  | 24      | 198       | 16055       | 77          | 25.5852     | 0  |
| cyan       | 8585    | GSE13485_DAY1_VS_DAY7_YF17D_VACCINE_PBMC_DI  | 17      | 194       | 16059       | 77          | 18.49652    | 0  |
| cyan       | 8595    | GSE13485_PRE_VS_POST_YF17D_VACCINATION_PBMC  | 17      | 195       | 16058       | 77          | 18.40167    | 0  |
| cyan       | 8619    | GSE14000_UNSTIM_VS_4H_LPS_DC_DN              | 20      | 193       | 16060       | 77          | 21.87336    | 0  |
| cyan       | 8661    | GSE1432_CTRL_VS_IFNG_6H_MICROGLIA_DN         | 18      | 197       | 16056       | 77          | 19.28631    | 0  |
| cyan       | 8663    | GSE1432_CTRL_VS_IFNG_24H_MICROGLIA_DN        | 20      | 192       | 16061       | 77          | 21.98728    | 0  |
| cyan       | 9225    | GSE18791_CTRL_VS_NEWCASTLE_VIRUS_DC_6H_DN    | 18      | 197       | 16056       | 77          | 19.28631    | 0  |
| cyan       | 9227    | GSE18791_CTRL_VS_NEWCASTLE_VIRUS_DC_8H_DN    | 21      | 180       | 16073       | 77          | 24.62576    | 0  |
| cyan       | 9229    | GSE18791_CTRL_VS_NEWCASTLE_VIRUS_DC_10H_DN   | 17      | 183       | 16070       | 77          | 19.60833    | 0  |
| cyan       | 9243    | GSE18791_UNSTIM_VS_NEWCATSLE_VIRUS_DC_6H_DI  | 25      | 186       | 16067       | 77          | 28.37069    | 0  |
| cyan       | 9245    | GSE18791_UNSTIM_VS_NEWCATSLE_VIRUS_DC_10H_I  | 20      | 180       | 16073       | 77          | 23.4531     | 0  |
| cyan       | 9523    | GSE2706_2H_VS_8H_R848_STIM_DC_DN             | 18      | 171       | 16082       | 77          | 22.21873    | 0  |
| greenyello | 2653    | GNF2_IL2RB                                   | 16      | 44        | 16209       | 150         | 39.40121    | 0  |
| greenyello | 2684    | GNF2_PTPN4                                   | 14      | 49        | 16204       | 150         | 30.9581     | 0  |
| greenyello | 5151    | HAHTOLA_SEZARY_SYNDROM_DN                    | 13      | 38        | 16215       | 150         | 37.06825    | 0  |
| greenyello | 9473    | GSE26495_NAIVE_VS_PD1HIGH_CD8_TCELL_DN       | 40      | 197       | 16056       | 150         | 22.00068    | 0  |
| greenyello | 9475    | GSE26495_NAIVE_VS_PD1LOW_CD8_TCELL_DN        | 42      | 198       | 16055       | 150         | 22.98404    | 0  |
| greenyello | 9786    | GSE34205_HEALTHY_VS_RSV_INF_INFANT_PBMC_UP   | 22      | 193       | 16060       | 150         | 12.35116    | 0  |
| lightcyan  | 3654    | MODULE_171                                   | 14      | 122       | 16131       | 62          | 30.08223    | 0  |
| lightcyan  | 4650    | REACTOME_INTERFERON_ALPHA_BETA_SIGNALING     | 14      | 49        | 16204       | 62          | 74.89862    | 0  |
| lightcyan  | 4656    | REACTOME_INTERFERON_SIGNALING                | 18      | 137       | 16116       | 62          | 34.44243    | 0  |
| lightcyan  | 4747    | REACTOME_CYTOKINE_SIGNALING_IN_IMMUNE_SYSTE  | 18      | 238       | 16015       | 62          | 19.8261     | 0  |
| lightcyan  | 4891    | FULCHER_INFLAMMATORY_RESPONSE_LLECTIN_VS_LPS | 28      | 437       | 15816       | 62          | 16.79649    | 0  |
| lightcyan  | 5010    | TAKEDA_TARGETS_OF_NUP98_HOXA9_FUSION_3D_UF   | 31      | 162       | 16091       | 62          | 50.16358    | 0  |
| lightcyan  | 5012    | TAKEDA_TARGETS_OF_NUP98_HOXA9_FUSION_8D_UF   | 24      | 138       | 16115       | 62          | 45.59046    | 0  |
| lightcyan  | 5014    | TAKEDA_TARGETS_OF_NUP98_HOXA9_FUSION_10D_U   | 27      | 178       | 16075       | 62          | 39.76359    | 0  |
| lightcyan  | 5016    | TAKEDA_TARGETS_OF_NUP98_HOXA9_FUSION_16D_U   | 18      | 162       | 16091       | 62          | 29.12724    | 0  |
| lightcyan  | 5221    | GRAESSMANN_APOPTOSIS_BY_SERUM_DEPRIVATION_   | 25      | 475       | 15778       | 62          | 13.79711    | 0  |
| lightcyan  | 5235    | GRAESSMANN_RESPONSE_TO_MC_AND_SERUM_DEPR     | 19      | 177       | 16076       | 62          | 28.13988    | 0  |
| lightcyan  | 5510    | FARMER_BREAST_CANCER_CLUSTER_1               | 15      | 41        | 16212       | 62          | 95.90677    | 0  |
| lightcyan  | 5531    | BOWIE_RESPONSE_TO_TAMOXIFEN                  | 9       | 18        | 16235       | 62          | 131.0726    | 0  |
| lightcyan  | 5552    | XU_AKT1_TARGETS_6HR                          | 10      | 25        | 16228       | 62          | 104.8581    | 0  |
| lightcyan  | 5561    | EINAV_INTERFERON_SIGNATURE_IN_CANCER         | 12      | 27        | 16226       | 62          | 116.509     | 0  |
| lightcyan  | 5569    | DAUER_STAT3_TARGETS_DN                       | 22      | 50        | 16203       | 62          | 115.3439    | 0  |
| lightcyan  | 5586    | SEITZ_NEOPLASTIC_TRANSFORMATION_BY_8P_DELETI | 15      | 59        | 16194       | 62          | 66.64707    | 0  |
| lightcyan  | 5782    | NUYTEN_NIPP1_TARGETS_UP                      | 29      | 683       | 15570       | 62          | 11.13061    | 0  |
| lightcyan  | 5784    | NUYTEN_EZH2_TARGETS_UP                       | 29      | 946       | 15307       | 62          | 8.036162    | 0  |
| lightcyan  | 6099    | DER_IFN_ALPHA_RESPONSE_UP                    | 12      | 72        | 16181       | 62          | 43.69086    | 0  |
| lightcyan  | 6128    | RADAEVA_RESPONSE_TO_IFNA1_UP                 | 14      | 51        | 16202       | 62          | 71.96142    | 0  |
| lightcyan  | 6147    | DER_IFN_BETA_RESPONSE_UP                     | 15      | 101       | 16152       | 62          | 38.93245    | 0  |
| lightcyan  | 6179    | SANA_TNF_SIGNALING_UP                        | 12      | 73        | 16180       | 62          | 43.09236    | 0  |
| lightcyan  | 6322    | ROETH_TERT_TARGETS_UP                        | 9       | 14        | 16239       | 62          | 168.5219    | 0  |
| lightcyan  | 6341    | BENNETT_SYSTEMIC_LUPUS_ERYTHEMATOSUS         | 15      | 29        | 16224       | 62          | 135.5923    | 0  |
| lightcyan  | 6393    | LIANG_SILENCED_BY_METHYLATION_2              | 11      | 44        | 16209       | 62          | 65.53629    | 0  |

|           |       |                                              |    |     |       |     |          |   |
|-----------|-------|----------------------------------------------|----|-----|-------|-----|----------|---|
| lightcyan | 6428  | DEBIASI_APOPTOSIS_BY_REOVIRUS_INFECTION_UP   | 19 | 293 | 15960 | 62  | 16.99917 | 0 |
| lightcyan | 6508  | BROWNE_INTERFERON_RESPONSIVE_GENES           | 19 | 68  | 16185 | 62  | 73.24644 | 0 |
| lightcyan | 7082  | MOSERLE_IFNA_RESPONSE                        | 22 | 31  | 16222 | 62  | 186.0385 | 0 |
| lightcyan | 7326  | ZHANG_INTERFERON_RESPONSE                    | 10 | 22  | 16231 | 62  | 119.1569 | 0 |
| lightcyan | 7843  | STAMBOLSKY_TARGETS_OF_MUTATED_TP53_DN        | 12 | 45  | 16208 | 62  | 69.90538 | 0 |
| lightcyan | 8130  | BOSCO_INTERFERON_INDUCED_ANTIVIRAL_MODULE    | 28 | 76  | 16177 | 62  | 96.5798  | 0 |
| lightcyan | 8257  | LTE2_UP.V1_DN                                | 25 | 176 | 16077 | 62  | 37.23653 | 0 |
| lightcyan | 8259  | MEK_UP.V1_DN                                 | 18 | 173 | 16080 | 62  | 27.27522 | 0 |
| lightcyan | 8385  | HECKER_IFNB1_TARGETS                         | 34 | 93  | 16160 | 62  | 95.83802 | 0 |
| lightcyan | 8435  | GSE10325_CD4_TCELL_VS_LUPUS_CD4_TCELL_DN     | 31 | 184 | 16069 | 62  | 44.16576 | 0 |
| lightcyan | 8437  | GSE10325_BCELL_VS_LUPUS_BCELL_DN             | 21 | 199 | 16054 | 62  | 27.66356 | 0 |
| lightcyan | 8439  | GSE10325_MYELOID_VS_LUPUS_MYELOID_DN         | 29 | 198 | 16055 | 62  | 38.395   | 0 |
| lightcyan | 8573  | GSE13484_UNSTIM_VS_YF17D_VACCINE_STIM_PBMC   | 40 | 190 | 16063 | 62  | 55.18846 | 0 |
| lightcyan | 8577  | GSE13485_CTRL_VS_DAY3_YF17D_VACCINE_PBMC_DN  | 43 | 193 | 16060 | 62  | 58.4054  | 0 |
| lightcyan | 8579  | GSE13485_CTRL_VS_DAY7_YF17D_VACCINE_PBMC_DN  | 50 | 198 | 16055 | 62  | 66.19827 | 0 |
| lightcyan | 8583  | GSE13485_DAY1_VS_DAY3_YF17D_VACCINE_PBMC_DI  | 24 | 194 | 16059 | 62  | 32.43033 | 0 |
| lightcyan | 8585  | GSE13485_DAY1_VS_DAY7_YF17D_VACCINE_PBMC_DI  | 45 | 194 | 16059 | 62  | 60.80687 | 0 |
| lightcyan | 8589  | GSE13485_DAY3_VS_DAY7_YF17D_VACCINE_PBMC_DI  | 49 | 180 | 16073 | 62  | 71.36174 | 0 |
| lightcyan | 8592  | GSE13485_DAY7_VS_DAY21_YF17D_VACCINE_PBMC_L  | 38 | 196 | 16057 | 62  | 50.82406 | 0 |
| lightcyan | 8595  | GSE13485_PRE_VS_POST_YF17D_VACCINATION_PBMC  | 42 | 195 | 16058 | 62  | 56.46203 | 0 |
| lightcyan | 8615  | GSE14000_UNSTIM_VS_4H_LPS_DC_TRANSLATED_RNA  | 26 | 178 | 16075 | 62  | 38.29087 | 0 |
| lightcyan | 8617  | GSE14000_UNSTIM_VS_16H_LPS_DC_TRANSLATED_RN  | 21 | 189 | 16064 | 62  | 29.12724 | 0 |
| lightcyan | 8619  | GSE14000_UNSTIM_VS_4H_LPS_DC_DN              | 28 | 193 | 16060 | 62  | 38.03142 | 0 |
| lightcyan | 8663  | GSE1432_CTRL_VS_IFNG_24H_MICROGLIA_DN        | 18 | 192 | 16061 | 62  | 24.57611 | 0 |
| lightcyan | 9199  | GSE17974_IL4_AND_ANTI_IL12_VS_UNTREATED_24H  | 24 | 161 | 16092 | 62  | 39.07754 | 0 |
| lightcyan | 9223  | GSE18791_CTRL_VS_NEWCASTLE_VIRUS_DC_4H_DN    | 32 | 169 | 16084 | 62  | 49.63695 | 0 |
| lightcyan | 9225  | GSE18791_CTRL_VS_NEWCASTLE_VIRUS_DC_6H_DN    | 36 | 197 | 16056 | 62  | 47.9047  | 0 |
| lightcyan | 9227  | GSE18791_CTRL_VS_NEWCASTLE_VIRUS_DC_8H_DN    | 36 | 180 | 16073 | 62  | 52.42903 | 0 |
| lightcyan | 9229  | GSE18791_CTRL_VS_NEWCASTLE_VIRUS_DC_10H_DN   | 26 | 183 | 16070 | 62  | 37.24467 | 0 |
| lightcyan | 9231  | GSE18791_CTRL_VS_NEWCASTLE_VIRUS_DC_12H_DN   | 24 | 178 | 16075 | 62  | 35.34542 | 0 |
| lightcyan | 9233  | GSE18791_CTRL_VS_NEWCASTLE_VIRUS_DC_14H_DN   | 18 | 159 | 16094 | 62  | 29.67681 | 0 |
| lightcyan | 9235  | GSE18791_CTRL_VS_NEWCASTLE_VIRUS_DC_16H_DN   | 25 | 178 | 16075 | 62  | 36.81814 | 0 |
| lightcyan | 9243  | GSE18791_UNSTIM_VS_NEWCATSLE_VIRUS_DC_6H_DI  | 37 | 186 | 16067 | 62  | 52.14716 | 0 |
| lightcyan | 9245  | GSE18791_UNSTIM_VS_NEWCATSLE_VIRUS_DC_10H_I  | 33 | 180 | 16073 | 62  | 48.05995 | 0 |
| lightcyan | 9247  | GSE18791_UNSTIM_VS_NEWCATSLE_VIRUS_DC_18H_I  | 27 | 159 | 16094 | 62  | 44.51522 | 0 |
| lightcyan | 9389  | GSE22886_CTRL_VS_LPS_24H_DC_DN               | 28 | 195 | 16058 | 62  | 37.64136 | 0 |
| lightcyan | 9459  | GSE24634_IL4_VS_CTRL_TREATED_NAIVE_CD4_TCELL | 19 | 187 | 16066 | 62  | 26.63507 | 0 |
| lightcyan | 9501  | GSE2706_UNSTIM_VS_8H_R848_DC_DN              | 20 | 183 | 16070 | 62  | 28.64974 | 0 |
| lightcyan | 9515  | GSE2706_R848_VS_R848_AND_LPS_2H_STIM_DC_DN   | 15 | 160 | 16093 | 62  | 24.57611 | 0 |
| lightcyan | 9523  | GSE2706_2H_VS_8H_R848_STIM_DC_DN             | 15 | 171 | 16082 | 62  | 22.99519 | 0 |
| lightcyan | 9789  | GSE34205_HEALTHY_VS_FLU_INF_INFANT_PBMC_DN   | 34 | 193 | 16060 | 62  | 46.18101 | 0 |
| lightcyan | 9791  | GSE34205_RSV_VS_FLU_INF_INFANT_PBMC_DN       | 18 | 192 | 16061 | 62  | 24.57611 | 0 |
| lightcyan | 9957  | GSE3982_CTRL_VS_LPS_48H_DC_DN                | 17 | 184 | 16069 | 62  | 24.21993 | 0 |
| lightcyan | 10127 | GSE6269_HEALTHY_VS_FLU_INF_PBMC_DN           | 22 | 157 | 16096 | 62  | 36.73372 | 0 |
| lightcyan | 10134 | GSE6269_FLU_VS_E_COLI_INF_PBMC_UP            | 23 | 162 | 16091 | 62  | 37.21814 | 0 |
| lightcyan | 10136 | GSE6269_FLU_VS_STREP_AUREUS_INF_PBMC_UP      | 25 | 171 | 16082 | 62  | 38.32532 | 0 |
| lightcyan | 10138 | GSE6269_FLU_VS_STREP_PNEUMO_INF_PBMC_UP      | 30 | 167 | 16086 | 62  | 47.09195 | 0 |
| magenta   | 6110  | KLEIN_PRIMARY_EFFUSION_LYMPHOMA_DN           | 16 | 57  | 16196 | 167 | 27.31884 | 0 |
| magenta   | 6306  | HADDAD_B_LYMPHOCYTE_PROGENITOR               | 27 | 267 | 15986 | 167 | 9.841687 | 0 |
| magenta   | 8423  | GSE10325_CD4_TCELL_VS_BCELL_DN               | 55 | 184 | 16069 | 167 | 29.09122 | 0 |
| magenta   | 8426  | GSE10325_BCELL_VS_MYELOID_UP                 | 44 | 187 | 16066 | 167 | 22.89961 | 0 |
| magenta   | 8429  | GSE10325_LUPUS_CD4_TCELL_VS_LUPUS_BCELL_DN   | 48 | 186 | 16067 | 167 | 25.1157  | 0 |
| magenta   | 8432  | GSE10325_LUPUS_BCELL_VS_LUPUS_MYELOID_UP     | 32 | 188 | 16065 | 167 | 16.56568 | 0 |
| magenta   | 9323  | GSE22886_TCELL_VS_BCELL_NAIVE_DN             | 42 | 172 | 16081 | 167 | 23.765   | 0 |
| magenta   | 9325  | GSE22886_CD8_TCELL_VS_BCELL_NAIVE_DN         | 33 | 172 | 16081 | 167 | 18.6725  | 0 |
| magenta   | 9327  | GSE22886_CD4_TCELL_VS_BCELL_NAIVE_DN         | 30 | 173 | 16080 | 167 | 16.87688 | 0 |
| magenta   | 9364  | GSE22886_NAIVE_BCELL_VS_NEUTROPHIL_UP        | 28 | 193 | 16060 | 167 | 14.11945 | 0 |
| magenta   | 9366  | GSE22886_NAIVE_BCELL_VS_DC_UP                | 24 | 180 | 16073 | 167 | 12.97645 | 0 |
| magenta   | 9368  | GSE22886_NAIVE_BCELL_VS_MONOCYTE_UP          | 43 | 168 | 16085 | 167 | 24.91014 | 0 |
| magenta   | 9654  | GSE29618_BCELL_VS_MONOCYTE_UP                | 46 | 182 | 16071 | 167 | 24.59821 | 0 |

|         |                                                    |    |     |       |     |          |   |
|---------|----------------------------------------------------|----|-----|-------|-----|----------|---|
| magenta | 9656 GSE29618_BCELL_VS_PDC_UP                      | 28 | 187 | 16066 | 167 | 14.57248 | 0 |
| magenta | 9658 GSE29618_BCELL_VS_MDC_UP                      | 37 | 184 | 16069 | 167 | 19.57046 | 0 |
| magenta | 9666 GSE29618_BCELL_VS_MONOCYTE_DAY7_FLU_VACCINE   | 45 | 184 | 16069 | 167 | 23.80191 | 0 |
| magenta | 9668 GSE29618_BCELL_VS_PDC_DAY7_FLU_VACCINE_UP     | 26 | 183 | 16070 | 167 | 13.82736 | 0 |
| magenta | 9670 GSE29618_BCELL_VS_MDC_DAY7_FLU_VACCINE_UP     | 41 | 182 | 16071 | 167 | 21.92449 | 0 |
| magenta | 9963 GSE3982_MEMORY_CD4_TCELL_VS_BCELL_DN          | 33 | 191 | 16062 | 167 | 16.81503 | 0 |
| magenta | 10064 GSE3982_BCELL_VS_CENT_MEMORY_CD4_TCELL_UP    | 22 | 191 | 16062 | 167 | 11.21002 | 0 |
| magenta | 10066 GSE3982_BCELL_VS_NKCELL_UP                   | 26 | 192 | 16061 | 167 | 13.1792  | 0 |
| magenta | 10145 GSE6269_STREP_AUREUS_VS_STREP_PNEUMO_INF_PE  | 22 | 161 | 16092 | 167 | 13.29884 | 0 |
| pink    | 2574 GNF2_BNIP3L                                   | 29 | 67  | 16186 | 228 | 30.85474 | 0 |
| pink    | 2596 GNF2_PRDX2                                    | 16 | 31  | 16222 | 228 | 36.7923  | 0 |
| pink    | 2598 GNF2_RAD23A                                   | 30 | 68  | 16185 | 228 | 31.4493  | 0 |
| pink    | 2610 GNF2_ANK1                                     | 35 | 73  | 16180 | 228 | 34.17778 | 0 |
| pink    | 2625 GNF2_CDC27                                    | 26 | 59  | 16194 | 228 | 31.41377 | 0 |
| pink    | 2662 GNF2_MAP2K3                                   | 33 | 74  | 16179 | 228 | 31.7893  | 0 |
| pink    | 2681 GNF2_PCAF                                     | 18 | 35  | 16218 | 228 | 36.6609  | 0 |
| pink    | 2702 GNF2_SPTA1                                    | 39 | 80  | 16173 | 228 | 34.75148 | 0 |
| pink    | 2703 GNF2_SPTB                                     | 35 | 73  | 16180 | 228 | 34.17778 | 0 |
| pink    | 2706 GNF2_TAL1                                     | 34 | 72  | 16181 | 228 | 33.6624  | 0 |
| pink    | 5115 JAATINEN_HEMATOPOIETIC_STEM_CELL_DN           | 29 | 223 | 16030 | 228 | 9.270258 | 0 |
| pink    | 7484 VALK_AML_CLUSTER_7                            | 17 | 27  | 16226 | 228 | 44.8832  | 0 |
| pink    | 7485 VALK_AML_CLUSTER_8                            | 18 | 26  | 16227 | 228 | 49.35121 | 0 |
| pink    | 9787 GSE34205_HEALTHY_VS_RSV_INF_INFANT_PBMC_DN    | 46 | 194 | 16059 | 228 | 16.90265 | 0 |
| pink    | 9790 GSE34205_RSV_VS_FLU_INF_INFANT_PBMC_UP        | 60 | 155 | 16098 | 228 | 27.59423 | 0 |
| purple  | 4693 REACTOME_HEMOSTASIS                           | 29 | 394 | 15859 | 157 | 7.619661 | 0 |
| purple  | 7825 RAGHAVACHARI_PLATELET_SPECIFIC_GENES          | 23 | 70  | 16183 | 157 | 34.01447 | 0 |
| purple  | 7913 WIERENGA_STAT5A_TARGETS_DN                    | 32 | 205 | 16048 | 157 | 16.15958 | 0 |
| purple  | 10224 GSE9006_HEALTHY_VS_TYPE_1_DIABETES_PBMC_AT_I | 27 | 194 | 16059 | 157 | 14.40774 | 0 |
| red     | 9359 GSE22886_NAIVE_TCELL_VS_NEUTROPHIL_DN         | 41 | 163 | 16090 | 524 | 7.801866 | 0 |
| red     | 9365 GSE22886_NAIVE_BCELL_VS_NEUTROPHIL_DN         | 46 | 198 | 16055 | 524 | 7.20601  | 0 |
| red     | 9660 GSE29618_MONOCYTE_VS_PDC_UP                   | 39 | 198 | 16055 | 524 | 6.109444 | 0 |
| red     | 9662 GSE29618_MONOCYTE_VS_MDC_UP                   | 39 | 198 | 16055 | 524 | 6.109444 | 0 |
| red     | 10050 GSE3982_NEUTROPHIL_VS EFF_MEMORY_CD4_TCELL_  | 36 | 192 | 16061 | 524 | 5.81572  | 0 |
| red     | 10052 GSE3982_NEUTROPHIL_VS_CENT_MEMORY_CD4_TCEL   | 38 | 195 | 16058 | 524 | 6.044373 | 0 |
| red     | 10054 GSE3982_NEUTROPHIL_VS_NKCELL_UP              | 37 | 190 | 16063 | 524 | 6.040187 | 0 |
| salmon  | 955 TRANSLATION                                    | 20 | 168 | 16085 | 127 | 15.23528 | 0 |
| salmon  | 1197 STRUCTURAL_CONSTITUENT_OF_RIBOSOME            | 30 | 78  | 16175 | 127 | 49.22168 | 0 |
| salmon  | 1239 RNA_BINDING                                   | 25 | 244 | 16009 | 127 | 13.11233 | 0 |
| salmon  | 1310 STRUCTURAL_MOLECULE_ACTIVITY                  | 31 | 191 | 16062 | 127 | 20.77104 | 0 |
| salmon  | 2348 MORF_ACTG1                                    | 39 | 136 | 16117 | 127 | 36.69911 | 0 |
| salmon  | 2349 MORF_ANP32B                                   | 21 | 195 | 16058 | 127 | 13.78207 | 0 |
| salmon  | 2382 MORF_EIF3S6                                   | 21 | 119 | 16134 | 127 | 22.58407 | 0 |
| salmon  | 2383 MORF_EIF4A2                                   | 19 | 137 | 16116 | 127 | 17.74855 | 0 |
| salmon  | 2410 MORF_JUND                                     | 15 | 64  | 16189 | 127 | 29.99446 | 0 |
| salmon  | 2425 MORF_NME2                                     | 30 | 152 | 16101 | 127 | 25.2585  | 0 |
| salmon  | 2427 MORF_NPM1                                     | 42 | 160 | 16093 | 127 | 33.5938  | 0 |
| salmon  | 2460 MORF_RAN                                      | 29 | 265 | 15988 | 127 | 14.00496 | 0 |
| salmon  | 2476 MORF_TPT1                                     | 35 | 101 | 16152 | 127 | 44.34825 | 0 |
| salmon  | 2479 MORF_UBE2I                                    | 26 | 235 | 16018 | 127 | 14.15909 | 0 |
| salmon  | 2492 GCM_PSME1                                     | 16 | 85  | 16168 | 127 | 24.08967 | 0 |
| salmon  | 2496 GCM_ACTG1                                     | 21 | 123 | 16130 | 127 | 21.84963 | 0 |
| salmon  | 2510 GCM_CSNK2B                                    | 16 | 99  | 16154 | 127 | 20.68305 | 0 |
| salmon  | 2538 GCM_NPM1                                      | 31 | 116 | 16137 | 127 | 34.20058 | 0 |
| salmon  | 2561 GCM_TPT1                                      | 28 | 69  | 16184 | 127 | 51.93244 | 0 |
| salmon  | 2633 GNF2_DAP3                                     | 28 | 118 | 16135 | 127 | 30.36728 | 0 |
| salmon  | 2639 GNF2_EIF3S6                                   | 41 | 119 | 16134 | 127 | 44.0927  | 0 |
| salmon  | 2641 GNF2_FBL                                      | 39 | 144 | 16109 | 127 | 34.66027 | 0 |
| salmon  | 2677 GNF2_NPM1                                     | 19 | 70  | 16183 | 127 | 34.73645 | 0 |
| salmon  | 2704 GNF2_ST13                                     | 29 | 63  | 16190 | 127 | 58.90976 | 0 |
| salmon  | 2711 GNF2_TPT1                                     | 18 | 37  | 16216 | 127 | 62.25878 | 0 |

|           |       |                                                            |     |      |       |      |          |          |
|-----------|-------|------------------------------------------------------------|-----|------|-------|------|----------|----------|
| salmon    | 2789  | KEGG_RIBOSOME                                              | 37  | 84   | 16169 | 127  | 56.37055 | 0        |
| salmon    | 3521  | MODULE_29                                                  | 15  | 26   | 16227 | 127  | 73.83253 | 0        |
| salmon    | 3522  | MODULE_32                                                  | 30  | 232  | 16021 | 127  | 16.54867 | 0        |
| salmon    | 3571  | MODULE_83                                                  | 47  | 309  | 15944 | 127  | 19.46566 | 0        |
| salmon    | 3602  | MODULE_114                                                 | 40  | 330  | 15923 | 127  | 15.51229 | 0        |
| salmon    | 3636  | MODULE_151                                                 | 39  | 311  | 15942 | 127  | 16.04848 | 0        |
| salmon    | 4122  | REACTOME_TRANSLATION                                       | 40  | 144  | 16109 | 127  | 35.54899 | 0        |
| salmon    | 4131  | REACTOME_FORMATION_OF_THE_TERNARY_COMPLEX                  | 20  | 47   | 16206 | 127  | 54.45803 | 0        |
| salmon    | 4200  | REACTOME_SRP_DEPENDENT_COTRANSLATIONAL_PROCESSING          | 39  | 108  | 16145 | 127  | 46.21369 | 0        |
| salmon    | 4316  | REACTOME_ACTIVATION_OF_THE_MRNA_UPON_BINDING               | 20  | 54   | 16199 | 127  | 47.39866 | 0        |
| salmon    | 4361  | REACTOME_PEPTIDE_CHAIN_ELONGATION                          | 38  | 84   | 16169 | 127  | 57.89408 | 0        |
| salmon    | 4429  | REACTOME_METABOLISM_OF_PROTEINS                            | 40  | 394  | 15859 | 127  | 12.99253 | 0        |
| salmon    | 4437  | REACTOME_3_UTR_MEDIATED_TRANSLATIONAL_REGULATION           | 39  | 103  | 16150 | 127  | 48.45708 | 0        |
| salmon    | 4535  | REACTOME_METABOLISM_OF_MRNA                                | 40  | 208  | 16045 | 127  | 24.61084 | 0        |
| salmon    | 4549  | REACTOME_METABOLISM_OF_RNA                                 | 43  | 251  | 16002 | 127  | 21.92424 | 0        |
| salmon    | 4694  | REACTOME_INFLUENZA_LIFE_CYCLE                              | 40  | 134  | 16119 | 127  | 38.2019  | 0        |
| salmon    | 4695  | REACTOME_INFLUENZA_VIRAL_RNA_TRANSCRIPTION_AND_REPLICATION | 39  | 100  | 16153 | 127  | 49.91079 | 0        |
| salmon    | 4752  | REACTOME_NONSENSE_MEDIATED_DECAY_ENHANCEMENT               | 38  | 105  | 16148 | 127  | 46.31526 | 0        |
| salmon    | 4982  | OSMAN_BLADDER_CANCER_DN                                    | 30  | 391  | 15862 | 127  | 9.819159 | 0        |
| salmon    | 7207  | CHNG_MULTIPLE_MYELOMA_HYPERPLOID_UP                        | 19  | 50   | 16203 | 127  | 48.63102 | 0        |
| salmon    | 7433  | HSIAO_HOUSEKEEPING_GENES                                   | 39  | 385  | 15868 | 127  | 12.96384 | 0        |
| salmon    | 7690  | DANG_MYC_TARGETS_UP                                        | 19  | 135  | 16118 | 127  | 18.01149 | 0        |
| salmon    | 7840  | MARTENS_TRETINOIN_RESPONSE_DN                              | 42  | 786  | 15467 | 127  | 6.838432 | 0        |
| salmon    | 7991  | BILANGES_SERUM_AND_RAPAMYCIN_SENSITIVE_GENE                | 24  | 67   | 16186 | 127  | 45.84228 | 0        |
| salmon    | 8133  | PECE_MAMMARY_STEM_CELL_DN                                  | 22  | 131  | 16122 | 127  | 21.49222 | 0        |
| salmon    | 8609  | GSE14000_TRANSLATED_RNA_VS_MRNA_DC_DN                      | 20  | 181  | 16072 | 127  | 14.14104 | 0        |
| salmon    | 9364  | GSE22886_NAIVE_BCELL_VS_NEUTROPHIL_UP                      | 21  | 193  | 16060 | 127  | 13.92489 | 0        |
| turquoise | 4914  | DIAZ_CHRONIC_MEYLOGENOUS_LEUKEMIA_UP                       | 495 | 1378 | 14875 | 4169 | 1.400418 | 0        |
| turquoise | 5088  | KINSEY_TARGETS_OF_EWSR1_FLII_FUSION_UP                     | 437 | 1200 | 15053 | 4169 | 1.419717 | 0        |
| turquoise | 5142  | RODRIGUES_THYROID_CARCINOMA_POORLY_DIFFERENTIATED          | 282 | 616  | 15637 | 4169 | 1.78472  | 0        |
| turquoise | 5144  | RODRIGUES_THYROID_CARCINOMA_ANAPLASTIC_UP                  | 305 | 675  | 15578 | 4169 | 1.761561 | 0        |
| turquoise | 5306  | HAMAI_APOPTOSIS_VIA_TRAIL_UP                               | 281 | 552  | 15701 | 4169 | 1.984581 | 0        |
| turquoise | 5507  | SCHLOSSER_SERUM_RESPONSE_DN                                | 275 | 667  | 15586 | 4169 | 1.607343 | 0        |
| turquoise | 5946  | GEORGES_TARGETS_OF_MIR192_AND_MIR215                       | 342 | 843  | 15410 | 4169 | 1.581613 | 0        |
| turquoise | 5947  | SHEN_SMARCA2_TARGETS_UP                                    | 212 | 420  | 15833 | 4169 | 1.967833 | 0        |
| turquoise | 7095  | ZHANG_BREAST_CANCER_PROGENITORS_UP                         | 184 | 413  | 15840 | 4169 | 1.736878 | 0        |
| turquoise | 7455  | MILI_PSEUDOPODIA_HAPTOTAXIS_UP                             | 292 | 505  | 15748 | 4169 | 2.254203 | 0        |
| turquoise | 7922  | PILON_KLF1_TARGETS_DN                                      | 714 | 1952 | 14301 | 4169 | 1.426002 | 0        |
| turquoise | 7932  | JOHNSTONE_PARVB_TARGETS_3_DN                               | 422 | 882  | 15371 | 4169 | 1.865286 | 0        |
| turquoise | 8224  | PIGF_UP.V1_UP                                              | 102 | 171  | 16082 | 4169 | 2.325443 | 0        |
| brown     | 8427  | GSE10325_BCELL_VS_MYELOID_DN                               | 73  | 199  | 16054 | 2190 | 2.722446 | 1.11E-16 |
| salmon    | 7499  | JISON_SICKLE_CELL_DISEASE_DN                               | 19  | 175  | 16078 | 127  | 13.89458 | 1.11E-16 |
| yellow    | 6005  | NIKOLSKY_BREAST_CANCER_16P13_AMPLICON                      | 41  | 108  | 16145 | 1426 | 4.326873 | 1.11E-16 |
| yellow    | 7869  | LU_EZH2_TARGETS_UP                                         | 68  | 262  | 15991 | 1426 | 2.95816  | 1.11E-16 |
| brown     | 10275 | GSE9988_ANTI_TREM1_VS_CTRL_TREATED_MONOCYTE                | 72  | 197  | 16056 | 2190 | 2.712412 | 2.22E-16 |
| cyan      | 8615  | GSE14000_UNSTIM_VS_4H_LPS_DC_TRANSLATED_RNA                | 16  | 178  | 16075 | 77   | 18.9733  | 2.22E-16 |
| magenta   | 7066  | SMID_BREAST_CANCER_NORMAL_LIKE_UP                          | 29  | 407  | 15846 | 167  | 6.934588 | 2.22E-16 |
| purple    | 4324  | REACTOME_RESPONSE_TO_ELEVATED_PLATELET_CYTOKINES           | 15  | 73   | 16180 | 157  | 21.2717  | 2.22E-16 |
| red       | 9672  | GSE29618_MONOCYTE_VS_PDC_DAY7_FLU_VACCINE_UP               | 35  | 200  | 16053 | 524  | 5.428006 | 2.22E-16 |
| red       | 9977  | GSE3982_EOSINOPHIL_VS_NEUTROPHIL_DN                        | 33  | 178  | 16075 | 524  | 5.750375 | 2.22E-16 |
| red       | 10131 | GSE6269_HEALTHY_VS_STREP_AUREUS_INF_PBMCDN                 | 32  | 165  | 16088 | 524  | 6.015452 | 2.22E-16 |
| salmon    | 2303  | MORF_CCNI                                                  | 15  | 87   | 16166 | 127  | 22.06489 | 2.22E-16 |
| brown     | 7838  | MARTENS_BOUND_BY_PML_RARA_FUSION                           | 123 | 439  | 15814 | 2190 | 2.079362 | 3.33E-16 |
| lightcyan | 8823  | GSE16755_CTRL_VS_IFNA_TREATED_MAC_DN                       | 15  | 189  | 16064 | 62   | 20.80517 | 3.33E-16 |
| salmon    | 2645  | GNF2_GLTSCR2                                               | 11  | 31   | 16222 | 127  | 45.41097 | 3.33E-16 |
| brown     | 9363  | GSE22886_NAIVE_TCELL_VS_MONOCYTE_DN                        | 72  | 200  | 16053 | 2190 | 2.671726 | 4.44E-16 |
| salmon    | 2499  | GCM_APEX1                                                  | 16  | 113  | 16140 | 127  | 18.12055 | 4.44E-16 |
| lightcyan | 5530  | BOWIE_RESPONSE_TO_EXTRACELLULAR_MATRIX                     | 8   | 17   | 16236 | 62   | 123.3624 | 6.66E-16 |
| lightcyan | 8661  | GSE1432_CTRL_VS_IFNG_6H_MICROGLIA_DN                       | 15  | 197  | 16056 | 62   | 19.96029 | 6.66E-16 |
| purple    | 4763  | REACTOME_PLATELET_ACTIVATION_SIGNALING_AND_EFFECTS         | 20  | 180  | 16073 | 157  | 11.50248 | 6.66E-16 |

|           |       |                                              |     |      |       |      |          |          |
|-----------|-------|----------------------------------------------|-----|------|-------|------|----------|----------|
| salmon    | 9360  | GSE22886_NAIVE_TCELL_VS_DC_UP                | 19  | 193  | 16060 | 127  | 12.59871 | 6.66E-16 |
| brown     | 10277 | GSE9988_ANTI_TREM1_VS_VEHICLE_TREATED_MONO   | 71  | 197  | 16056 | 2190 | 2.67474  | 7.77E-16 |
| turquoise | 8574  | GSE13485_CTRL_VS_DAY1_YF17D_VACCINE_PBMC_UP  | 102 | 194  | 16059 | 4169 | 2.049746 | 7.77E-16 |
| cyan      | 8667  | GSE1432_1H_VS_24H_IFNG_MICROGLIA_DN          | 16  | 197  | 16056 | 77   | 17.14338 | 8.88E-16 |
| brown     | 8425  | GSE10325_CD4_TCELL_VS_MYELOID_DN             | 71  | 198  | 16055 | 2190 | 2.661231 | 1.11E-15 |
| brown     | 9662  | GSE29618_MONOCYTE_VS_MDC_UP                  | 71  | 198  | 16055 | 2190 | 2.661231 | 1.11E-15 |
| turquoise | 4981  | OSMAN_BLADDER_CANCER_UP                      | 173 | 394  | 15859 | 4169 | 1.711794 | 1.33E-15 |
| turquoise | 4872  | SENGUPTA_NASOPHARYNGEAL_CARCINOMA_WITH_LM    | 155 | 342  | 15911 | 4169 | 1.766881 | 1.55E-15 |
| turquoise | 6227  | FLECHNER_BIOPSY_KIDNEY_TRANSPLANT_OK_VS_DON  | 217 | 526  | 15727 | 4169 | 1.608332 | 1.55E-15 |
| brown     | 9381  | GSE22886_NAIVE_CD4_TCELL_VS_MONOCYTE_DN      | 71  | 200  | 16053 | 2190 | 2.634619 | 1.89E-15 |
| cyan      | 4656  | REACTOME_INTERFERON_SIGNALING                | 14  | 137  | 16116 | 77   | 21.57001 | 2.44E-15 |
| lightcyan | 6518  | KRASNOSELSKAYA_ILF3_TARGETS_UP               | 9   | 32   | 16221 | 62   | 73.72833 | 2.44E-15 |
| lightcyan | 6968  | WALLACE_PROSTATE_CANCER_RACE_UP              | 16  | 267  | 15986 | 62   | 15.70907 | 2.44E-15 |
| pink      | 6416  | IVANOVA_HEMATOPOIESIS_MATURE_CELL            | 27  | 279  | 15974 | 228  | 6.898557 | 2.44E-15 |
| lightcyan | 8199  | ERB2_UP.V1_DN                                | 14  | 181  | 16072 | 62   | 20.27642 | 4.88E-15 |
| cyan      | 8589  | GSE13485_DAY3_VS_DAY7_YF17D_VACCINE_PBMC_DI  | 15  | 180  | 16073 | 77   | 17.58983 | 5.00E-15 |
| lightcyan | 9509  | GSE2706_UNSTIM_VS_8H_LPS_AND_R848_DC_DN      | 14  | 182  | 16071 | 62   | 20.16501 | 5.33E-15 |
| red       | 10225 | GSE9006_HEALTHY_VS_TYPE_1_DIABETES_PBMC_AT_I | 32  | 185  | 16068 | 524  | 5.365133 | 5.77E-15 |
| lightcyan | 4731  | REACTOME_IMMUNE_SYSTEM                       | 23  | 801  | 15452 | 62   | 7.527264 | 6.00E-15 |
| red       | 10143 | GSE6269_E_COLI_VS_STREP_PNEUMO_INF_PBMC_DN   | 30  | 162  | 16091 | 524  | 5.743921 | 6.22E-15 |
| turquoise | 7407  | ZHANG_TLX_TARGETS_36HR_DN                    | 96  | 183  | 16070 | 4169 | 2.045134 | 6.66E-15 |
| cyan      | 8435  | GSE10325_CD4_TCELL_VS_LUPUS_CD4_TCELL_DN     | 15  | 184  | 16069 | 77   | 17.20744 | 6.88E-15 |
| red       | 9375  | GSE22886_NAIVE_CD8_TCELL_VS_MONOCYTE_DN      | 33  | 199  | 16054 | 524  | 5.143552 | 7.77E-15 |
| salmon    | 521   | CELLULAR_BIOSYNTHETIC_PROCESS                | 21  | 289  | 15964 | 127  | 9.299322 | 8.22E-15 |
| salmon    | 707   | MACROMOLECULE_BIOSYNTHETIC_PROCESS           | 21  | 289  | 15964 | 127  | 9.299322 | 8.22E-15 |
| turquoise | 7903  | GABRIELY_MIR21_TARGETS                       | 130 | 276  | 15977 | 4169 | 1.836267 | 8.22E-15 |
| cyan      | 5784  | NUYTEN_EZH2_TARGETS_UP                       | 27  | 946  | 15307 | 77   | 6.024423 | 8.44E-15 |
| turquoise | 6428  | DEBIASI_APOPTOSIS_BY_REOVIRUS_INFECTION_UP   | 136 | 293  | 15960 | 4169 | 1.80956  | 8.44E-15 |
| red       | 9363  | GSE22886_NAIVE_TCELL_VS_MONOCYTE_DN          | 33  | 200  | 16053 | 524  | 5.117834 | 9.10E-15 |
| turquoise | 7930  | JOHNSTONE_PARVB_TARGETS_2_DN                 | 146 | 322  | 15931 | 4169 | 1.76766  | 9.77E-15 |
| lightcyan | 7605  | UROSEVIC_RESPONSE_TO_IMIQUIMOD               | 8   | 23   | 16230 | 62   | 91.18093 | 1.31E-14 |
| lightcyan | 6932  | HELLER_SILENCED_BY_METHYLATION_UP            | 15  | 243  | 16010 | 62   | 16.1818  | 1.35E-14 |
| lightcyan | 8590  | GSE13485_DAY3_VS_DAY21_YF17D_VACCINE_PBMC_L  | 14  | 195  | 16058 | 62   | 18.82068 | 1.40E-14 |
| turquoise | 7185  | CHEN_HOXA5_TARGETS_9HR_UP                    | 107 | 214  | 16039 | 4169 | 1.949268 | 1.40E-14 |
| cyan      | 8577  | GSE13485_CTRL_VS_DAY3_YF17D_VACCINE_PBMC_DN  | 15  | 193  | 16060 | 77   | 16.40502 | 1.41E-14 |
| cyan      | 6233  | DER_IFN_GAMMA_RESPONSE_UP                    | 11  | 68   | 16185 | 77   | 34.14496 | 1.59E-14 |
| cyan      | 6508  | BROWNE_INTERFERON_RESPONSIVE_GENES           | 11  | 68   | 16185 | 77   | 34.14496 | 1.59E-14 |
| salmon    | 7692  | DANG_BOUND_BY_MYC                            | 36  | 1049 | 15204 | 127  | 4.391944 | 1.60E-14 |
| lightcyan | 6167  | GRANDVAUX_IRF3_TARGETS_UP                    | 7   | 14   | 16239 | 62   | 131.0726 | 2.79E-14 |
| magenta   | 10130 | GSE6269_HEALTHY_VS_STREP_AUREUS_INF_PBMC_UP  | 19  | 179  | 16074 | 167  | 10.33041 | 2.82E-14 |
| turquoise | 5141  | DODD_NASOPHARYNGEAL_CARCINOMA_DN             | 454 | 1311 | 14942 | 4169 | 1.350065 | 2.93E-14 |
| cyan      | 7305  | ICHIBA_GRAFT_VERSUS_HOST_DISEASE_D7_UP       | 12  | 98   | 16155 | 77   | 25.84628 | 3.06E-14 |
| salmon    | 7996  | BILANGES_SERUM_RESPONSE_TRANSLATION          | 10  | 32   | 16221 | 127  | 39.99262 | 3.31E-14 |
| lightcyan | 1639  | V\$ISRE_01                                   | 14  | 208  | 16045 | 62   | 17.64439 | 3.44E-14 |
| salmon    | 5742  | PUJANA_BRCA1_PCC_NETWORK                     | 43  | 1553 | 14700 | 127  | 3.543454 | 4.12E-14 |
| red       | 8427  | GSE10325_BCELL_VS_MYELOID_DN                 | 32  | 199  | 16054 | 524  | 4.987687 | 4.91E-14 |
| red       | 9381  | GSE22886_NAIVE_CD4_TCELL_VS_MONOCYTE_DN      | 32  | 200  | 16053 | 524  | 4.962748 | 5.66E-14 |
| red       | 9674  | GSE29618_MONOCYTE_VS_MDC_DAY7_FLU_VACCINE_   | 32  | 200  | 16053 | 524  | 4.962748 | 5.66E-14 |
| black     | 3169  | chr19p13                                     | 36  | 467  | 15786 | 283  | 4.427236 | 6.00E-14 |
| salmon    | 7236  | WANG_TUMOR_INVASIVENESS_UP                   | 22  | 363  | 15890 | 127  | 7.756144 | 7.39E-14 |
| red       | 3534  | MODULE_45                                    | 53  | 520  | 15733 | 524  | 3.161366 | 9.68E-14 |
| cyan      | 4645  | REACTOME_INTERFERON_GAMMA_SIGNALING          | 10  | 57   | 16196 | 77   | 37.03121 | 1.12E-13 |
| lightcyan | 9507  | GSE2706_UNSTIM_VS_2H_LPS_AND_R848_DC_DN      | 13  | 181  | 16072 | 62   | 18.82811 | 1.36E-13 |
| lightcyan | 9857  | GSE360_HIGH_DOSE_B_MALAYI_VS_M_TUBERCULOSIS  | 13  | 181  | 16072 | 62   | 18.82811 | 1.36E-13 |
| magenta   | 8502  | GSE12366_NAIVE_VS_MEMORY_BCELL_UP            | 18  | 170  | 16083 | 167  | 10.30483 | 1.45E-13 |
| lightcyan | 9405  | GSE24081_CONTROLLER_VS_PROGRESSOR_HIV_SPECIF | 13  | 182  | 16071 | 62   | 18.72465 | 1.46E-13 |
| lightcyan | 8805  | GSE15930_STIM_VS_STIM_AND_IFNAB_48H_CD8_T_C  | 13  | 186  | 16067 | 62   | 18.32197 | 1.93E-13 |
| brown     | 9369  | GSE22886_NAIVE_BCELL_VS_MONOCYTE_DN          | 67  | 199  | 16054 | 2190 | 2.498683 | 2.16E-13 |
| magenta   | 9328  | GSE22886_NAIVE_VS_IGG_IGA_MEMORY_BCELL_UP    | 18  | 174  | 16079 | 167  | 10.06793 | 2.18E-13 |
| cyan      | 8823  | GSE16755_CTRL_VS_IFNA_TREATED_MAC_DN         | 14  | 189  | 16064 | 77   | 15.6354  | 2.25E-13 |

|            |       |                                               |     |      |       |      |          |          |
|------------|-------|-----------------------------------------------|-----|------|-------|------|----------|----------|
| blue       | 8424  | GSE10325_CD4_TCELL_VS_MYELOID_UP              | 79  | 194  | 16059 | 2978 | 2.222461 | 2.35E-13 |
| lightcyan  | 5545  | XU_HGF_TARGETS_INDUCED_BY_AKT1_6HR            | 7   | 18   | 16235 | 62   | 101.9453 | 2.55E-13 |
| red        | 9655  | GSE29618_BCELL_VS_MONOCYTE_DN                 | 31  | 199  | 16054 | 524  | 4.831821 | 2.97E-13 |
| salmon     | 2396  | MORF_G22P1                                    | 16  | 170  | 16083 | 127  | 12.04484 | 3.01E-13 |
| cyan       | 9457  | GSE24634_IL4_VS_CTRL_TREATED_NAIVE_CD4_TCELL_ | 14  | 193  | 16060 | 77   | 15.31135 | 3.01E-13 |
| salmon     | 5081  | TIEN_INTESTINE_PROBIOTICS_6HR_UP              | 11  | 54   | 16199 | 127  | 26.06926 | 3.08E-13 |
| blue       | 8454  | GSE11057_CD4_CENT_MEM_VS_PBMC_UP              | 79  | 195  | 16058 | 2978 | 2.211064 | 3.25E-13 |
| turquoise  | 8587  | GSE13485_DAY1_VS_DAY21_YF17D_VACCINE_PBMC_I   | 93  | 184  | 16069 | 4169 | 1.970456 | 3.25E-13 |
| lightcyan  | 3793  | MODULE_345                                    | 11  | 111  | 16142 | 62   | 25.97835 | 3.45E-13 |
| cyan       | 5561  | EINAV_INTERFERON_SIGNATURE_IN_CANCER          | 8   | 27   | 16226 | 77   | 62.54161 | 3.61E-13 |
| cyan       | 8665  | GSE1432_1H_VS_6H_IFNG_MICROGLIA_DN            | 14  | 196  | 16057 | 77   | 15.07699 | 3.72E-13 |
| salmon     | 5084  | TIEN_INTESTINE_PROBIOTICS_24HR_DN             | 17  | 205  | 16048 | 127  | 10.61268 | 4.19E-13 |
| blue       | 2312  | MORF_HDAC2                                    | 101 | 277  | 15976 | 2978 | 1.989988 | 4.89E-13 |
| red        | 10133 | GSE6269_HEALTHY_VS_STREP_PNEUMO_INF_PBMC_D    | 28  | 165  | 16088 | 524  | 5.263521 | 4.91E-13 |
| salmon     | 7137  | GRADE_COLON_CANCER_UP                         | 30  | 812  | 15441 | 127  | 4.728191 | 6.23E-13 |
| salmon     | 7848  | KIM_BIPOLAR_DISORDER_OLIGODENDROCYTE_DENSIT   | 27  | 646  | 15607 | 127  | 5.348858 | 6.24E-13 |
| brown      | 10141 | GSE6269_E_COLI_VS_STREP_AUREUS_INF_PBMC_DN    | 60  | 172  | 16081 | 2190 | 2.588882 | 6.81E-13 |
| lightcyan  | 8158  | ALTEMEIER_RESPONSE_TO_LPS_WITH_MECHANICAL_V   | 11  | 118  | 16135 | 62   | 24.43726 | 6.84E-13 |
| brown      | 9671  | GSE29618_BCELL_VS_MDC_DAY7_FLU_VACCINE_DN     | 66  | 199  | 16054 | 2190 | 2.461389 | 7.20E-13 |
| lightcyan  | 5087  | ZHOU_INFLAMMATORY_RESPONSE_LPS_UP             | 15  | 319  | 15934 | 62   | 12.32657 | 7.21E-13 |
| turquoise  | 2244  | SCGGAAGY_V\$ELK1_02                           | 403 | 1162 | 15091 | 4169 | 1.352074 | 7.76E-13 |
| turquoise  | 10118 | GSE39820_TGFBETA1_VS_TGFBETA3_IN_IL6_TREATED_ | 97  | 197  | 16056 | 4169 | 1.919584 | 7.78E-13 |
| lightcyan  | 8064  | YANG_BCL3_TARGETS_UP                          | 15  | 322  | 15931 | 62   | 12.21173 | 8.25E-13 |
| turquoise  | 7651  | PYEON_CANCER_HEAD_AND_NECK_VS_CERVICAL_UP     | 92  | 184  | 16069 | 4169 | 1.949268 | 9.78E-13 |
| lightcyan  | 7683  | ZHAN_MULTIPLE_MYELOMA_LB_DN                   | 8   | 38   | 16215 | 62   | 55.18846 | 1.25E-12 |
| grey60     | 6239  | NAKAJIMA_EOSINOPHIL                           | 7   | 30   | 16223 | 44   | 86.19015 | 1.26E-12 |
| cyan       | 6099  | DER_IFN_ALPHA_RESPONSE_UP                     | 10  | 72   | 16181 | 77   | 29.31638 | 1.32E-12 |
| brown      | 10293 | GSE9988_ANTI_TREM1_AND_LPS_VS_CTRL_TREATED_I  | 65  | 197  | 16056 | 2190 | 2.448705 | 1.40E-12 |
| yellow     | 3331  | chr9q34                                       | 51  | 199  | 16054 | 1426 | 2.920997 | 1.40E-12 |
| magenta    | 3750  | MODULE_292                                    | 15  | 120  | 16133 | 167  | 12.16542 | 1.48E-12 |
| pink       | 2985  | BIOCARTA_AHSP_PATHWAY                         | 8   | 13   | 16240 | 228  | 43.86775 | 1.61E-12 |
| yellow     | 8609  | GSE14000_TRANSLATED_RNA_VS_MRNA_DC_DN         | 48  | 181  | 16072 | 1426 | 3.022572 | 1.66E-12 |
| lightgreen | 9473  | GSE26495_NAIVE_VS_PD1HIGH_CD8_TCELL_DN        | 11  | 197  | 16056 | 42   | 21.60781 | 1.93E-12 |
| lightcyan  | 9237  | GSE18791_CTRL_VS_NEWCASTLE_VIRUS_DC_18H_DN    | 12  | 173  | 16080 | 62   | 18.18348 | 1.96E-12 |
| lightcyan  | 9839  | GSE360_L_DONOVANI_VS_M_TUBERCULOSIS_DC_DN     | 12  | 173  | 16080 | 62   | 18.18348 | 1.96E-12 |
| lightgreen | 9475  | GSE26495_NAIVE_VS_PD1LOW_CD8_TCELL_DN         | 11  | 198  | 16055 | 42   | 21.49868 | 2.04E-12 |
| cyan       | 9231  | GSE18791_CTRL_VS_NEWCASTLE_VIRUS_DC_12H_DN    | 13  | 178  | 16075 | 77   | 15.4158  | 2.09E-12 |
| blue       | 9380  | GSE22886_NAIVE_CD4_TCELL_VS_MONOCYTE_UP       | 77  | 194  | 16059 | 2978 | 2.166196 | 2.24E-12 |
| cyan       | 8130  | BOSCO_INTERFERON_INDUCED_ANTIVIRAL_MODULE     | 10  | 76   | 16177 | 77   | 27.77341 | 2.31E-12 |
| pink       | 7909  | CHYLA_CBFA2T3_TARGETS_DN                      | 21  | 213  | 16040 | 228  | 7.028107 | 2.52E-12 |
| lightcyan  | 9511  | GSE2706_R848_VS_LPS_2H_STIM_DC_DN             | 11  | 134  | 16119 | 62   | 21.51938 | 2.81E-12 |
| magenta    | 9637  | GSE29614_DAY3_VS_DAY7_TIV_FLU_VACCINE_PBMC_   | 17  | 175  | 16078 | 167  | 9.454269 | 2.93E-12 |
| magenta    | 3669  | MODULE_188                                    | 15  | 127  | 16126 | 167  | 11.49488 | 3.44E-12 |
| salmon     | 5910  | BENPORATH_MYC_MAX_TARGETS                     | 28  | 754  | 15499 | 127  | 4.752438 | 3.77E-12 |
| magenta    | 9338  | GSE22886_IGG_IGA_MEMORY_BCELL_VS_BLOOD_PLA'   | 17  | 179  | 16074 | 167  | 9.243    | 4.23E-12 |
| lightcyan  | 9953  | GSE3982_CTRL_VS_LPS_4H_MAC_DN                 | 12  | 187  | 16066 | 62   | 16.82215 | 4.94E-12 |
| lightcyan  | 6178  | SANA_RESPONSE_TO_IFNG_UP                      | 9   | 70   | 16183 | 62   | 33.70438 | 5.07E-12 |
| cyan       | 4747  | REACTOME_CYTOKINE_SIGNALING_IN_IMMUNE_SYSTE   | 14  | 238  | 16015 | 77   | 12.41635 | 5.27E-12 |
| salmon     | 7280  | FLOTHO_PEDIATRIC_ALL_THERAPY_RESPONSE_UP      | 10  | 52   | 16201 | 127  | 24.61084 | 7.10E-12 |
| salmon     | 7846  | KIM_ALL_DISORDERS_OLIGODENDROCYTE_NUMBER_C    | 27  | 717  | 15536 | 127  | 4.819194 | 7.11E-12 |
| magenta    | 8396  | KAECH_DAY15_EFF_VS_MEMORY_CD8_TCELL_UP        | 17  | 185  | 16068 | 167  | 8.943227 | 7.22E-12 |
| cyan       | 5217  | MARKEY_RB1_ACUTE_LOF_UP                       | 13  | 197  | 16056 | 77   | 13.929   | 7.63E-12 |
| blue       | 4986  | GINESTIER_BREAST_CANCER_20Q13_AMPLIFICATION_I | 70  | 173  | 16080 | 2978 | 2.208314 | 7.69E-12 |
| cyan       | 4829  | BERTUCCI_MEDULLARY_VS_DUCTAL_BREAST_CANCER_   | 13  | 198  | 16055 | 77   | 13.85865 | 8.14E-12 |
| lightcyan  | 8665  | GSE1432_1H_VS_6H_IFNG_MICROGLIA_DN            | 12  | 196  | 16057 | 62   | 16.0497  | 8.60E-12 |
| lightcyan  | 3688  | MODULE_208                                    | 10  | 108  | 16145 | 62   | 24.2727  | 8.85E-12 |
| salmon     | 7703  | WONG_EMBRYONIC_STEM_CELL_CORE                 | 19  | 327  | 15926 | 127  | 7.435936 | 9.12E-12 |
| red        | 9371  | GSE22886_NAIVE_CD8_TCELL_VS_NEUTROPHIL_DN     | 26  | 160  | 16093 | 524  | 5.040291 | 9.42E-12 |
| salmon     | 367   | BIOSYNTHETIC_PROCESS                          | 21  | 418  | 15835 | 127  | 6.429435 | 1.05E-11 |
| red        | 8433  | GSE10325_LUPUS_BCELL_VS_LUPUS_MYELOID_DN      | 29  | 200  | 16053 | 524  | 4.49749  | 1.10E-11 |

|            |       |                                              |     |      |       |      |          |          |
|------------|-------|----------------------------------------------|-----|------|-------|------|----------|----------|
| magenta    | 9663  | GSE29618_MONOCYTE_VS_MDC_DN                  | 17  | 190  | 16063 | 167  | 8.707879 | 1.11E-11 |
| blue       | 9374  | GSE22886_NAIVE_CD8_TCELL_VS_MONOCYTE_UP      | 76  | 196  | 16057 | 2978 | 2.116247 | 1.21E-11 |
| turquoise  | 4903  | PUIFFE_INVASION_INHIBITED_BY_ASCITES_DN      | 72  | 137  | 16116 | 4169 | 2.048866 | 1.40E-11 |
| turquoise  | 6482  | CUI_TCF21_TARGETS_2_DN                       | 276 | 759  | 15494 | 4169 | 1.41765  | 1.53E-11 |
| pink       | 3908  | MODULE_539                                   | 8   | 16   | 16237 | 228  | 35.64254 | 1.55E-11 |
| magenta    | 9334  | GSE22886_NAIVE_BCELL_VS_BLOOD_PLASMA_CELL_UI | 17  | 194  | 16059 | 167  | 8.528335 | 1.55E-11 |
| magenta    | 9673  | GSE29618_MONOCYTE_VS_PDC_DAY7_FLU_VACCINE_   | 17  | 195  | 16058 | 167  | 8.4846   | 1.68E-11 |
| lightcyan  | 9201  | GSE17974_IL4_AND_ANTI_IL12_VS_UNTREATED_48H_ | 11  | 159  | 16094 | 62   | 18.13583 | 1.83E-11 |
| blue       | 7044  | MITSIADES_RESPONSE_TO_APLIDIN_DN             | 89  | 246  | 16007 | 2978 | 1.97453  | 1.93E-11 |
| lightcyan  | 3535  | MODULE_46                                    | 14  | 332  | 15921 | 62   | 11.05431 | 2.01E-11 |
| turquoise  | 5432  | SEIDEN_ONCOGENESIS_BY_MET                    | 51  | 85   | 16168 | 4169 | 2.339122 | 2.12E-11 |
| cyan       | 9223  | GSE18791_CTRL_VS_NEWCASTLE_VIRUS_DC_4H_DN    | 12  | 169  | 16084 | 77   | 14.98778 | 2.21E-11 |
| lightcyan  | 5237  | GRAESSMANN_APOPTOSIS_BY_DOXORUBICIN_UP       | 22  | 1072 | 15181 | 62   | 5.379845 | 2.31E-11 |
| salmon     | 6640  | MODY_HIPPOCAMPUS_PRENATAL                    | 9   | 41   | 16212 | 127  | 28.09238 | 2.31E-11 |
| lightcyan  | 2257  | STTTTCRNTTT_V\$IRF_Q6                        | 11  | 163  | 16090 | 62   | 17.69078 | 2.40E-11 |
| lightcyan  | 9932  | GSE37416_CTRL_VS_48H_F_TULARENSIS_LVS_NEUTRO | 11  | 163  | 16090 | 62   | 17.69078 | 2.40E-11 |
| magenta    | 5140  | DODD_NASOPHARYNGEAL_CARCIOMA_UP              | 44  | 1439 | 14814 | 167  | 2.975836 | 2.41E-11 |
| lightcyan  | 3750  | MODULE_292                                   | 10  | 120  | 16133 | 62   | 21.84543 | 2.56E-11 |
| salmon     | 5454  | LI_AMPLIFIED_IN_LUNG_CANCER                  | 14  | 160  | 16093 | 127  | 11.19793 | 2.68E-11 |
| lightcyan  | 3563  | MODULE_75                                    | 14  | 340  | 15913 | 62   | 10.79421 | 2.77E-11 |
| salmon     | 9788  | GSE34205_HEALTHY_VS_FLU_INF_INFANT_PBMC_UP   | 15  | 193  | 16060 | 127  | 9.946351 | 2.78E-11 |
| yellow     | 7898  | LI_DCP2_BOUND_MRNA                           | 30  | 88   | 16165 | 1426 | 3.885551 | 2.89E-11 |
| salmon     | 6194  | POMEROY_MEDULLOBLASTOMA_PROGNOSIS_DN         | 9   | 42   | 16211 | 127  | 27.42351 | 2.92E-11 |
| lightcyan  | 3853  | MODULE_436                                   | 10  | 122  | 16131 | 62   | 21.48731 | 3.02E-11 |
| blue       | 4984  | GINESTIER_BREAST_CANCER_ZNF217_AMPLIFIED_DN  | 106 | 314  | 15939 | 2978 | 1.842405 | 3.15E-11 |
| cyan       | 6143  | WIELAND_UP_BY_HBV_INFECTION                  | 10  | 99   | 16154 | 77   | 21.321   | 3.46E-11 |
| magenta    | 3630  | MODULE_145                                   | 13  | 102  | 16151 | 167  | 12.40396 | 3.77E-11 |
| blue       | 2323  | MORF_PRKDC                                   | 73  | 189  | 16064 | 2978 | 2.107997 | 3.81E-11 |
| red        | 3572  | MODULE_84                                    | 46  | 480  | 15773 | 524  | 2.972479 | 3.84E-11 |
| turquoise  | 6864  | MARSON_BOUND_BY_FOXP3_UNSTIMULATED           | 394 | 1161 | 15092 | 4169 | 1.323018 | 4.16E-11 |
| brown      | 5038  | MULLIGHAN_MLL_SIGNATURE_2_UP                 | 104 | 409  | 15844 | 2190 | 1.88712  | 4.38E-11 |
| salmon     | 2466  | MORF_SART1                                   | 10  | 62   | 16191 | 127  | 20.64135 | 4.52E-11 |
| brown      | 10131 | GSE6269_HEALTHY_VS_STREP_AUREUS_INF_PBMC_DN  | 55  | 165  | 16088 | 2190 | 2.47382  | 4.70E-11 |
| greenyello | 2623  | GNF2_CD7                                     | 9   | 38   | 16215 | 150  | 25.66263 | 4.95E-11 |
| turquoise  | 7034  | ACEVEDO_LIVER_CANCER_UP                      | 325 | 929  | 15324 | 4169 | 1.363858 | 4.95E-11 |
| blue       | 8448  | GSE11057_NAIVE_CD4_VS_PBMC_CD4_TCELL_UP      | 74  | 194  | 16059 | 2978 | 2.081799 | 5.62E-11 |
| blue       | 9370  | GSE22886_NAIVE_CD8_TCELL_VS_NEUTROPHIL_UP    | 75  | 198  | 16055 | 2978 | 2.067307 | 6.15E-11 |
| salmon     | 5744  | PUJANA_ATM_PCC_NETWORK                       | 35  | 1317 | 14936 | 127  | 3.401043 | 6.28E-11 |
| magenta    | 5965  | SHIN_B_CELL_LYMPHOMA_CLUSTER_9               | 7   | 15   | 16238 | 167  | 45.41756 | 6.40E-11 |
| pink       | 7921  | PILON_KLF1_TARGETS_UP                        | 27  | 428  | 15825 | 228  | 4.496956 | 6.61E-11 |
| brown      | 7931  | JOHNSTONE_PARVB_TARGETS_3_UP                 | 104 | 412  | 15841 | 2190 | 1.873379 | 6.93E-11 |
| lightcyan  | 7498  | JISON_SICKLE_CELL_DISEASE_UP                 | 11  | 180  | 16073 | 62   | 16.01998 | 7.04E-11 |
| brown      | 9659  | GSE29618_BCELL_VS_MDC_DN                     | 62  | 199  | 16054 | 2190 | 2.312214 | 7.09E-11 |
| purple     | 525   | BLOOD_COAGULATION                            | 9   | 38   | 16215 | 157  | 24.51844 | 7.46E-11 |
| purple     | 835   | COAGULATION                                  | 9   | 38   | 16215 | 157  | 24.51844 | 7.46E-11 |
| brown      | 2674  | GNF2_MYD88                                   | 29  | 60   | 16193 | 2190 | 3.58704  | 7.80E-11 |
| yellow     | 10238 | GSE9006_TYPE_1_VS_TYPE_2_DIABETES_PBMC_AT_D  | 48  | 200  | 16053 | 1426 | 2.735428 | 7.82E-11 |
| salmon     | 2347  | MORF_ACP1                                    | 15  | 208  | 16045 | 127  | 9.229066 | 8.07E-11 |
| turquoise  | 5599  | DACOSTA_UV_RESPONSE_VIA_ERCC3_DN             | 294 | 829  | 15424 | 4169 | 1.382593 | 8.19E-11 |
| brown      | 8590  | GSE13485_DAY3_VS_DAY21_YF17D_VACCINE_PBMC_L  | 61  | 195  | 16058 | 2190 | 2.321585 | 8.37E-11 |
| brown      | 10052 | GSE3982_NEUTROPHIL_VS_CENT_MEMORY_CD4_TCEL   | 61  | 195  | 16058 | 2190 | 2.321585 | 8.37E-11 |
| blue       | 2436  | MORF_PPP1CC                                  | 65  | 163  | 16090 | 2978 | 2.176379 | 9.00E-11 |
| brown      | 6328  | THEILGAARD_NEUTROPHIL_AT_SKIN_WOUND_DN       | 67  | 224  | 16029 | 2190 | 2.219812 | 9.11E-11 |
| turquoise  | 7989  | LEE_BMP2_TARGETS_DN                          | 300 | 850  | 15403 | 4169 | 1.375954 | 9.58E-11 |
| brown      | 2614  | GNF2_CASP1                                   | 42  | 111  | 16142 | 2190 | 2.80812  | 1.02E-10 |
| magenta    | 7416  | SHEDDEN_LUNG_CANCER_GOOD_SURVIVAL_A12        | 18  | 251  | 16002 | 167  | 6.979364 | 1.08E-10 |
| cyan       | 9389  | GSE22886_CTRL_VS_LPS_24H_DC_DN               | 12  | 195  | 16058 | 77   | 12.98941 | 1.18E-10 |
| blue       | 5742  | PUJANA_BRCA1_PCC_NETWORK                     | 380 | 1553 | 14700 | 2978 | 1.33543  | 1.18E-10 |
| cyan       | 8592  | GSE13485_DAY7_VS_DAY21_YF17D_VACCINE_PBMC_L  | 12  | 196  | 16057 | 77   | 12.92314 | 1.25E-10 |
| salmon     | 7540  | YAMASHITA_LIVER_CANCER_WITH_EPCAM_UP         | 9   | 49   | 16204 | 127  | 23.50587 | 1.29E-10 |

|            |                                                    |     |      |       |      |          |          |
|------------|----------------------------------------------------|-----|------|-------|------|----------|----------|
| magenta    | 9661 GSE29618_MONOCYTE_VS_PDC_DN                   | 16  | 192  | 16061 | 167  | 8.110279 | 1.35E-10 |
| yellow     | 3413 chr16p13                                      | 52  | 230  | 16023 | 1426 | 2.576852 | 1.36E-10 |
| pink       | 3516 MODULE_24                                     | 24  | 350  | 15903 | 228  | 4.88812  | 1.50E-10 |
| blue       | 348 NUCLEOBASENUCLEOSIDENUCLEOTIDE_AND_NUCLEIC_    | 291 | 1136 | 15117 | 2978 | 1.398053 | 1.55E-10 |
| magenta    | 3758 MODULE_301                                    | 14  | 139  | 16114 | 167  | 9.802352 | 1.63E-10 |
| salmon     | 8699 GSE1460_DP_THYMOCYTE_VS_NAIVE_CD4_TCELL_ADU   | 14  | 183  | 16070 | 127  | 9.790543 | 1.63E-10 |
| blue       | 2325 MORF_RAD23A                                   | 111 | 342  | 15911 | 2978 | 1.771355 | 1.64E-10 |
| lightcyan  | 8621 GSE14000_UNSTIM_VS_16H_LPS_DC_DN              | 11  | 195  | 16058 | 62   | 14.78768 | 1.67E-10 |
| brown      | 9660 GSE29618_MONOCYTE_VS_PDC_UP                   | 61  | 198  | 16055 | 2190 | 2.28641  | 1.68E-10 |
| turquoise  | 8406 GSE10239_NAIVE_VS_MEMORY_CD8_TCELL_UP         | 92  | 198  | 16055 | 4169 | 1.811441 | 1.69E-10 |
| lightcyan  | 5048 TONKS_TARGETS_OF_RUNX1_RUNX1T1_FUSION_MON     | 11  | 196  | 16057 | 62   | 14.71223 | 1.76E-10 |
| salmon     | 7993 BILANGES_RAPAMYCIN_SENSITIVE_VIA_TSC1_AND_TSC | 10  | 71   | 16182 | 127  | 18.02484 | 1.83E-10 |
| lightcyan  | 5217 MARKEY_RB1_ACUTE_LOF_UP                       | 11  | 197  | 16056 | 62   | 14.63755 | 1.86E-10 |
| brown      | 9997 GSE3982_MAST_CELL_VS_NEUTROPHIL_DN            | 56  | 175  | 16078 | 2190 | 2.374868 | 1.88E-10 |
| lightcyan  | 6125 BECKER_TAMOXIFEN_RESISTANCE_UP                | 7   | 42   | 16211 | 62   | 43.69086 | 2.01E-10 |
| yellow     | 6877 SANSOM_APC_TARGETS_REQUIRE_MYC                | 47  | 199  | 16054 | 1426 | 2.691899 | 2.20E-10 |
| yellow     | 10230 GSE9006_HEALTHY_VS_TYPE_2_DIABETES_PBMC_AT_I | 47  | 199  | 16054 | 1426 | 2.691899 | 2.20E-10 |
| pink       | 6102 WELCH_GATA1_TARGETS                           | 8   | 21   | 16232 | 228  | 27.15622 | 2.31E-10 |
| greenyello | 9477 GSE26495_PD1HIGH_VS_PD1LOW_CD8_TCELL_DN       | 14  | 159  | 16094 | 150  | 9.540545 | 2.35E-10 |
| red        | 8425 GSE10325_CD4_TCELL_VS_MYELOID_DN              | 27  | 198  | 16055 | 524  | 4.229615 | 2.38E-10 |
| red        | 9357 GSE22886_DC_VS_MONOCYTE_DN                    | 27  | 198  | 16055 | 524  | 4.229615 | 2.38E-10 |
| purple     | 274 HEMOSTASIS                                     | 9   | 43   | 16210 | 157  | 21.66746 | 2.48E-10 |
| greenyello | 5115 JAATINEN_HEMATOPOIETIC_STEM_CELL_DN           | 16  | 223  | 16030 | 150  | 7.77423  | 2.49E-10 |
| cyan       | 5010 TAKEDA_TARGETS_OF_NUP98_HOXA9_FUSION_3D_UF    | 11  | 162  | 16091 | 77   | 14.33245 | 2.60E-10 |
| yellow     | 5646 DAIRKEE_TERT_TARGETS_UP                       | 68  | 350  | 15903 | 1426 | 2.214394 | 2.76E-10 |
| magenta    | 3710 MODULE_238                                    | 14  | 145  | 16108 | 167  | 9.396738 | 2.87E-10 |
| red        | 8594 GSE13485_PRE_VS_POST_YF17D_VACCINATION_PBMC   | 24  | 159  | 16094 | 524  | 4.681838 | 2.90E-10 |
| red        | 8431 GSE10325_LUPUS_CD4_TCELL_VS_LUPUS_MYELOID_DI  | 27  | 200  | 16053 | 524  | 4.187319 | 3.00E-10 |
| turquoise  | 5742 PUJANA_BRCA1_PCC_NETWORK                      | 502 | 1553 | 14700 | 4169 | 1.260184 | 3.49E-10 |
| salmon     | 7212 MALONEY_RESPONSE_TO_17AAG_DN                  | 10  | 76   | 16177 | 127  | 16.839   | 3.66E-10 |
| red        | 10031 GSE3982_MAC_VS_NEUTROPHIL_DN                 | 24  | 161  | 16092 | 524  | 4.623678 | 3.78E-10 |
| salmon     | 8418 GSE10239_NAIVE_VS_DAY4.5_EFF_CD8_TCELL_UP     | 14  | 196  | 16057 | 127  | 9.14117  | 4.06E-10 |
| magenta    | 5436 KLEIN_TARGETS_OF_BCR_ABL1_FUSION              | 9   | 43   | 16210 | 167  | 20.37    | 4.30E-10 |
| red        | 9377 GSE22886_NAIVE_CD4_TCELL_VS_NEUTROPHIL_DN     | 24  | 162  | 16091 | 524  | 4.595137 | 4.30E-10 |
| yellow     | 7840 MARTENS_TRETINOIN_RESPONSE_DN                 | 121 | 786  | 15467 | 1426 | 1.754595 | 4.42E-10 |
| blue       | 2300 MORF_BUB3                                     | 93  | 275  | 15978 | 2978 | 1.845691 | 4.57E-10 |
| brown      | 5036 MULLIGHAN_MLL_SIGNATURE_1_UP                  | 94  | 371  | 15882 | 2190 | 1.88037  | 4.66E-10 |
| purple     | 831 WOUND_HEALING                                  | 9   | 46   | 16207 | 157  | 20.25436 | 4.72E-10 |
| brown      | 10133 GSE6269_HEALTHY_VS_STREP_PNEUMO_INF_PBMC_D   | 53  | 165  | 16088 | 2190 | 2.383863 | 4.90E-10 |
| lightgreen | 2623 GNF2_CD7                                      | 6   | 38   | 16215 | 42   | 61.1015  | 5.33E-10 |
| lightgreen | 5151 HAHTOLA_SEZARY_SYNDROM_DN                     | 6   | 38   | 16215 | 42   | 61.1015  | 5.33E-10 |
| purple     | 8458 GSE11057_PBMC_VS_MEM_CD4_TCELL_UP             | 15  | 192  | 16061 | 157  | 8.087679 | 5.40E-10 |
| blue       | 2345 MORF_XRCC5                                    | 82  | 233  | 16020 | 2978 | 1.920732 | 5.63E-10 |
| purple     | 4807 PICCALUGA_ANGIOIMMUNOBLASTIC_LYMPHOMA_UP      | 14  | 163  | 16090 | 157  | 8.891485 | 6.01E-10 |
| salmon     | 2665 GNF2_MBD4                                     | 7   | 25   | 16228 | 127  | 35.83339 | 6.44E-10 |
| salmon     | 8146 HOLLEMAN_ASPARAGINASE_RESISTANCE_B_ALL_UP     | 7   | 25   | 16228 | 127  | 35.83339 | 6.44E-10 |
| salmon     | 7253 LEE_LIVER_CANCER_SURVIVAL_DN                  | 13  | 168  | 16085 | 127  | 9.902934 | 6.61E-10 |
| red        | 9940 GSE37416_0H_VS_24H_F_TULARENSIS_LVS_NEUTROPI  | 26  | 193  | 16060 | 524  | 4.17848  | 6.74E-10 |
| purple     | 502 REGULATION_OF_BODY_FLUID_LEVELS                | 9   | 48   | 16205 | 157  | 19.41043 | 7.07E-10 |
| brown      | 8453 GSE11057_CD4_EFF_MEM_VS_PBMC_DN               | 59  | 195  | 16058 | 2190 | 2.245468 | 7.31E-10 |
| turquoise  | 2272 RCGCANGCGY_V\$NRF1_Q6                         | 305 | 881  | 15372 | 4169 | 1.349664 | 7.39E-10 |
| yellow     | 3169 chr19p13                                      | 82  | 467  | 15786 | 1426 | 2.001294 | 7.43E-10 |
| red        | 3498 MODULE_5                                      | 38  | 383  | 15870 | 524  | 3.077422 | 7.77E-10 |
| salmon     | 2391 MORF_FBL                                      | 12  | 138  | 16115 | 127  | 11.12838 | 8.10E-10 |
| cyan       | 9203 GSE17974_IL4_AND_ANTI_IL12_VS_UNTREATED_72H_  | 11  | 181  | 16072 | 77   | 12.82794 | 8.51E-10 |
| brown      | 7348 RUTELLA_RESPONSE_TO_CSF2RB_AND_IL4_DN         | 82  | 312  | 15941 | 2190 | 1.950512 | 9.41E-10 |
| red        | 9942 GSE37416_0H_VS_48H_F_TULARENSIS_LVS_NEUTROPI  | 26  | 196  | 16057 | 524  | 4.114523 | 9.46E-10 |
| red        | 2646 GNF2_HCK                                      | 18  | 94   | 16159 | 524  | 5.939459 | 9.85E-10 |
| blue       | 10132 GSE6269_HEALTHY_VS_STREP_PNEUMO_INF_PBMC_U   | 69  | 186  | 16067 | 2978 | 2.024627 | 1.01E-09 |
| red        | 10058 GSE3982_NEUTROPHIL_VS_TH2_UP                 | 24  | 169  | 16084 | 524  | 4.404806 | 1.04E-09 |



|            |                                                    |     |      |       |      |          |          |
|------------|----------------------------------------------------|-----|------|-------|------|----------|----------|
| turquoise  | 5997 NIKOLSKY_BREAST_CANCER_8Q12_Q22_AMPLICON      | 53  | 97   | 16156 | 4169 | 2.130128 | 1.08E-09 |
| lightgreen | 8445 GSE11057_NAIVE_VS_EFF_MEMORY_CD4_TCELL_DN     | 9   | 190  | 16063 | 42   | 18.33045 | 1.08E-09 |
| brown      | 8458 GSE11057_PBMC_VS_MEM_CD4_TCELL_UP             | 58  | 192  | 16061 | 2190 | 2.2419   | 1.09E-09 |
| brown      | 9982 GSE3982_EOSINOPHIL_VS_EFF_MEMORY_CD4_TCELL_   | 58  | 192  | 16061 | 2190 | 2.2419   | 1.09E-09 |
| magenta    | 3804 MODULE_361                                    | 13  | 133  | 16120 | 167  | 9.512809 | 1.09E-09 |
| cyan       | 6147 DER_IFN_BETA_RESPONSE_UP                      | 9   | 101  | 16152 | 77   | 18.80892 | 1.09E-09 |
| magenta    | 5898 PASQUALUCCI_LYMPHOMA_BY_GC_STAGE_DN           | 14  | 161  | 16092 | 167  | 8.4629   | 1.15E-09 |
| blue       | 8428 GSE10325_LUPUS_CD4_TCELL_VS_LUPUS_BCELL_UP    | 71  | 194  | 16059 | 2978 | 1.997402 | 1.16E-09 |
| magenta    | 5979 MORI_PLASMA_CELL_DN                           | 8   | 33   | 16220 | 167  | 23.59354 | 1.17E-09 |
| red        | 9667 GSE29618_BCELL_VS_MONOCYTE_DAY7_FLU_VACCINE   | 26  | 198  | 16055 | 524  | 4.072962 | 1.18E-09 |
| lightcyan  | 9525 GSE2706_2H_VS_8H_LPS_STIM_DC_DN               | 10  | 177  | 16076 | 62   | 14.81046 | 1.20E-09 |
| cyan       | 9859 GSE360_LOW_DOSE_B_MALAYI_VS_M_TUBERCULOSIS    | 11  | 187  | 16066 | 77   | 12.41635 | 1.20E-09 |
| blue       | 9376 GSE22886_NAIVE_CD4_TCELL_VS_NEUTROPHIL_UP     | 72  | 198  | 16055 | 2978 | 1.984614 | 1.23E-09 |
| brown      | 10015 GSE3982_DC_VS_NEUTROPHIL_DN                  | 56  | 183  | 16070 | 2190 | 2.271048 | 1.23E-09 |
| magenta    | 10062 GSE3982_BCELL_VS_EFF_MEMORY_CD4_TCELL_UP     | 15  | 193  | 16060 | 167  | 7.563991 | 1.38E-09 |
| cyan       | 8807 GSE15930_STIM_VS_STIM_AND_TRICHOSTATINA_48H_  | 11  | 190  | 16063 | 77   | 12.2203  | 1.42E-09 |
| red        | 10141 GSE6269_E_COLI_VS_STREP_AUREUS_INF_PBMC_DN   | 24  | 172  | 16081 | 524  | 4.327978 | 1.50E-09 |
| greenyello | 9308 GSE22886_NAIVE_CD8_TCELL_VS_MEMORY_TCELL_UP   | 14  | 183  | 16070 | 150  | 8.289326 | 1.51E-09 |
| blue       | 10021 GSE3982_DC_VS_EFF_MEMORY_CD4_TCELL_DN        | 64  | 169  | 16084 | 2978 | 2.066817 | 1.55E-09 |
| lightcyan  | 6704 BROWNE_HCMV_INFECTION_6HR_UP                  | 7   | 56   | 16197 | 62   | 32.76815 | 1.66E-09 |
| turquoise  | 4844 SENGUPTA_NASOPHARYNGEAL_CARCINOMA_UP          | 116 | 276  | 15977 | 4169 | 1.638515 | 1.69E-09 |
| lightcyan  | 9527 GSE2706_2H_VS_8H_R848_AND_LPS_STIM_DC_DN      | 10  | 184  | 16069 | 62   | 14.24702 | 1.75E-09 |
| cyan       | 9463 GSE24634_IL4_VS_CTRL_TREATED_NAIVE_CD4_TCELL_ | 11  | 194  | 16059 | 77   | 11.96834 | 1.77E-09 |
| blue       | 2304 MORF_DNMT1                                    | 49  | 116  | 16137 | 2978 | 2.305403 | 1.85E-09 |
| magenta    | 6388 KUMAR_TARGETS_OF_MLL_AF9_FUSION               | 20  | 376  | 15877 | 167  | 5.176774 | 1.87E-09 |
| lightcyan  | 9859 GSE360_LOW_DOSE_B_MALAYI_VS_M_TUBERCULOSIS    | 10  | 187  | 16066 | 62   | 14.01846 | 2.05E-09 |
| brown      | 9449 GSE24634_TEFF_VS_TCONV_DAY3_IN_CULTURE_DN     | 58  | 195  | 16058 | 2190 | 2.207409 | 2.08E-09 |
| turquoise  | 5238 GRAESSMANN_APOPTOSIS_BY_DOXORUBICIN_DN        | 540 | 1705 | 14548 | 4169 | 1.234727 | 2.15E-09 |
| magenta    | 6365 ZHAN_MULTIPLE_MYELOMA_CD1_VS_CD2_DN           | 9   | 51   | 16202 | 167  | 17.17471 | 2.16E-09 |
| cyan       | 8439 GSE10325_MYELOID_VS_LUPUS_MYELOID_DN          | 11  | 198  | 16055 | 77   | 11.72655 | 2.20E-09 |
| purple     | 7498 JISON_SICKLE_CELL_DISEASE_UP                  | 14  | 180  | 16073 | 157  | 8.051734 | 2.21E-09 |
| red        | 6796 KRIGE_RESPONSE_TO_TOSEDOSTAT_24HR_UP          | 57  | 759  | 15494 | 524  | 2.329353 | 2.28E-09 |
| turquoise  | 4893 GARY_CD5_TARGETS_DN                           | 164 | 426  | 15827 | 4169 | 1.500845 | 2.43E-09 |
| brown      | 8455 GSE11057_CD4_CENT_MEM_VS_PBMC_DN              | 57  | 191  | 16062 | 2190 | 2.214782 | 2.50E-09 |
| magenta    | 9342 GSE22886_IGM_MEMORY_BCELL_VS_BLOOD_PLASMA     | 14  | 171  | 16082 | 167  | 7.967994 | 2.54E-09 |
| brown      | 8449 GSE11057_NAIVE_CD4_VS_PBMC_CD4_TCELL_DN       | 58  | 196  | 16057 | 2190 | 2.196147 | 2.58E-09 |
| brown      | 10295 GSE9988_ANTI_TREM1_AND_LPS_VS_VEHICLE_TREATE | 58  | 196  | 16057 | 2190 | 2.196147 | 2.58E-09 |
| lightgreen | 2684 GNF2_PTPN4                                    | 6   | 49   | 16204 | 42   | 47.38484 | 2.64E-09 |
| magenta    | 7061 SMID_BREAST_CANCER_LUMINAL_B_DN               | 21  | 425  | 15828 | 167  | 4.808919 | 2.68E-09 |
| blue       | 2346 MORF_AATF                                     | 73  | 205  | 16048 | 2978 | 1.94347  | 2.73E-09 |
| greenyello | 9791 GSE34205_RSV_VS_FLU_INF_INFANT_PBMC_DN        | 14  | 192  | 16061 | 150  | 7.900764 | 2.82E-09 |
| turquoise  | 8199 ERB2_UP.V1_DN                                 | 83  | 181  | 16072 | 4169 | 1.787727 | 2.85E-09 |
| purple     | 5070 SENESE_HDAC1_AND_HDAC2_TARGETS_DN             | 14  | 184  | 16069 | 157  | 7.876696 | 2.95E-09 |
| cyan       | 4650 REACTOME_INTERFERON_ALPHA_BETA_SIGNALING      | 7   | 49   | 16204 | 77   | 30.15399 | 2.97E-09 |
| purple     | 3536 MODULE_47                                     | 14  | 186  | 16067 | 157  | 7.792001 | 3.39E-09 |
| red        | 6778 MCLACHLAN_DENTAL_CARIES_UP                    | 27  | 223  | 16030 | 524  | 3.755443 | 3.46E-09 |
| turquoise  | 8354 TBK1.DF_DN                                    | 115 | 276  | 15977 | 4169 | 1.62439  | 3.62E-09 |
| brown      | 10283 GSE9988_LPS_VS_CTRL_TREATED_MONOCYTE_DN      | 58  | 198  | 16055 | 2190 | 2.173963 | 3.91E-09 |
| brown      | 10291 GSE9988_LOW_LPS_VS_VEHICLE_TREATED_MONOCYTI  | 58  | 198  | 16055 | 2190 | 2.173963 | 3.91E-09 |
| salmon     | 5745 PUJANA_CHEK2_PCC_NETWORK                      | 24  | 757  | 15496 | 127  | 4.057375 | 3.92E-09 |
| cyan       | 4731 REACTOME_IMMUNE_SYSTEM                        | 19  | 801  | 15452 | 77   | 5.006842 | 3.99E-09 |
| cyan       | 6068 GRANDVAUX_IFN_RESPONSE_NOT_VIA_IRF3           | 5   | 14   | 16239 | 77   | 75.38497 | 4.05E-09 |
| brown      | 3534 MODULE_45                                     | 118 | 520  | 15733 | 2190 | 1.684101 | 4.17E-09 |
| lightcyan  | 1720 V\$IRF7_01                                    | 10  | 202  | 16051 | 62   | 12.97748 | 4.31E-09 |
| lightcyan  | 4189 REACTOME_ANTIVIRAL_MECHANISM_BY_IFN_STIMUL/   | 7   | 64   | 16189 | 62   | 28.67213 | 4.35E-09 |
| lightgreen | 4919 DEURIG_T_CELL_PROLYMPHOCYTIC_LEUKEMIA_DN      | 10  | 308  | 15945 | 42   | 12.56416 | 4.44E-09 |
| red        | 50 MEMBRANE_PART                                   | 82  | 1316 | 14937 | 524  | 1.932681 | 4.50E-09 |
| salmon     | 2540 GCM_PFN1                                      | 8   | 50   | 16203 | 127  | 20.47622 | 4.54E-09 |
| magenta    | 3853 MODULE_436                                    | 12  | 122  | 16131 | 167  | 9.572789 | 4.55E-09 |
| pink       | 7918 ACOSTA_PROLIFERATION_INDEPENDENT_MYC_TARGET   | 13  | 110  | 16143 | 228  | 8.424601 | 4.62E-09 |

|            |       |                                                |     |      |       |      |          |          |
|------------|-------|------------------------------------------------|-----|------|-------|------|----------|----------|
| brown      | 10289 | GSE9988_LOW_LPS_VS_CTRL_TREATED_MONOCYTE_D     | 58  | 199  | 16054 | 2190 | 2.163039 | 4.81E-09 |
| blue       | 2328  | MORF_RAD54L                                    | 45  | 105  | 16148 | 2978 | 2.33901  | 4.85E-09 |
| red        | 2577  | GNF2_CARD15                                    | 15  | 70   | 16183 | 524  | 6.646538 | 4.88E-09 |
| turquoise  | 6442  | BLALOCK_ALZHEIMERS_DISEASE_DN                  | 373 | 1128 | 15125 | 4169 | 1.289144 | 4.89E-09 |
| turquoise  | 2467  | MORF_SKP1A                                     | 89  | 200  | 16053 | 4169 | 1.734849 | 4.90E-09 |
| magenta    | 10017 | GSE3982_DC_VS_BCELL_DN                         | 14  | 180  | 16073 | 167  | 7.569594 | 4.95E-09 |
| red        | 9352  | GSE22886_NEUTROPHIL_VS_DC_UP                   | 21  | 142  | 16111 | 524  | 4.587047 | 5.53E-09 |
| turquoise  | 4983  | GINESTIER_BREAST_CANCER_ZNF217_AMPLIFIED_UP    | 43  | 75   | 16178 | 4169 | 2.235161 | 5.62E-09 |
| purple     | 7921  | PILON_KLF1_TARGETS_UP                          | 20  | 428  | 15825 | 157  | 4.83749  | 5.77E-09 |
| salmon     | 7655  | CAIRO_HEPATOBLASTOMA_CLASSES_UP                | 21  | 591  | 15662 | 127  | 4.547384 | 5.84E-09 |
| cyan       | 3572  | MODULE_84                                      | 15  | 480  | 15773 | 77   | 6.596185 | 5.99E-09 |
| cyan       | 10138 | GSE6269_FLU_VS_STREP_PNEUMO_INF_PBMC_UP        | 10  | 167  | 16086 | 77   | 12.6394  | 6.07E-09 |
| blue       | 8459  | GSE11057_PBMC_VS_MEM_CD4_TCELL_DN              | 69  | 193  | 16060 | 2978 | 1.951195 | 6.11E-09 |
| turquoise  | 2001  | CATTTCA,MIR-203                                | 106 | 251  | 16002 | 4169 | 1.646394 | 6.15E-09 |
| blue       | 9358  | GSE22886_NAIVE_TCELL_VS_NEUTROPHIL_UP          | 70  | 197  | 16056 | 2978 | 1.939281 | 6.37E-09 |
| brown      | 10127 | GSE6269_HEALTHY_VS_FLU_INF_PBMC_DN             | 49  | 157  | 16096 | 2190 | 2.316252 | 6.41E-09 |
| red        | 8158  | ALTEMEIER_RESPONSE_TO_LPS_WITH_MECHANICAL_V    | 19  | 118  | 16135 | 524  | 4.994291 | 7.05E-09 |
| brown      | 2705  | GNF2_STAT6                                     | 31  | 78   | 16175 | 2190 | 2.949555 | 7.09E-09 |
| magenta    | 4913  | HUTTMANN_B_CLL_POOR_SURVIVAL_DN                | 9   | 58   | 16195 | 167  | 15.1019  | 7.11E-09 |
| magenta    | 5971  | MORI_LARGE_PRE_BII_LYMPHOCYTE_DN               | 9   | 58   | 16195 | 167  | 15.1019  | 7.11E-09 |
| blue       | 2363  | MORF_CDC16                                     | 35  | 73   | 16180 | 2978 | 2.616701 | 7.18E-09 |
| cyan       | 9853  | GSE360_T_GONDII_VS_M_TUBERCULOSIS_DC_DN        | 10  | 171  | 16082 | 77   | 12.34374 | 7.63E-09 |
| turquoise  | 182   | INTRACELLULAR_ORGANELLE_PART                   | 371 | 1125 | 15128 | 4169 | 1.285651 | 7.64E-09 |
| lightcyan  | 5409  | MAHADEVAN_RESPONSE_TO_MP470_UP                 | 5   | 19   | 16234 | 62   | 68.98557 | 7.65E-09 |
| blue       | 10053 | GSE3982_NEUTROPHIL_VS_CENT_MEMORY_CD4_TCEL     | 69  | 194  | 16059 | 2978 | 1.941137 | 7.80E-09 |
| turquoise  | 9313  | GSE22886_NAIVE_CD4_TCELL_VS_MEMORY_TCELL_DN    | 87  | 196  | 16057 | 4169 | 1.730473 | 8.42E-09 |
| cyan       | 9237  | GSE18791_CTRL_VS_NEWCASTLE_VIRUS_DC_18H_DN     | 10  | 173  | 16080 | 77   | 12.20104 | 8.53E-09 |
| brown      | 10050 | GSE3982_NEUTROPHIL_VS_EFF_MEMORY_CD4_TCELL_    | 56  | 192  | 16061 | 2190 | 2.164593 | 8.57E-09 |
| turquoise  | 8001  | FEVR_CTNNB1_TARGETS_DN                         | 193 | 526  | 15727 | 4169 | 1.430452 | 8.62E-09 |
| turquoise  | 8225  | VEGF_A_UP.V1_DN                                | 80  | 176  | 16077 | 4169 | 1.772062 | 8.99E-09 |
| blue       | 2398  | MORF_GNB1                                      | 96  | 302  | 15951 | 2978 | 1.734895 | 9.22E-09 |
| blue       | 6224  | PENG_Glutamine_Deprivation_DN                  | 101 | 323  | 15930 | 2978 | 1.706584 | 9.99E-09 |
| blue       | 2330  | MORF_RFC4                                      | 57  | 150  | 16103 | 2978 | 2.073922 | 1.03E-08 |
| lightcyan  | 5277  | MISSIAGLIA_REGULATED_BY_METHYLATION_UP         | 8   | 113  | 16140 | 62   | 18.55895 | 1.05E-08 |
| red        | 10048 | GSE3982_NEUTROPHIL_VS_BASOPHIL_UP              | 23  | 175  | 16078 | 524  | 4.076543 | 1.06E-08 |
| cyan       | 5235  | GRAESSMANN_RESPONSE_TO_MC_AND_SERUM_DEPR       | 10  | 177  | 16076 | 77   | 11.92531 | 1.06E-08 |
| cyan       | 9525  | GSE2706_2H_VS_8H_LPS_STIM_DC_DN                | 10  | 177  | 16076 | 77   | 11.92531 | 1.06E-08 |
| turquoise  | 6366  | MOREAUX_MULTIPLE_MYELOMA_BY_TACI_DN            | 78  | 171  | 16082 | 4169 | 1.77828  | 1.13E-08 |
| salmon     | 6840  | HILLION_HMGA1B_TARGETS                         | 9   | 80   | 16173 | 127  | 14.39734 | 1.19E-08 |
| salmon     | 2350  | MORF_AP2M1                                     | 13  | 213  | 16040 | 127  | 7.810765 | 1.19E-08 |
| cyan       | 6428  | DEBIASI_APOPTOSIS_BY_REOVIRUS_INFECTION_UP     | 12  | 293  | 15960 | 77   | 8.64483  | 1.22E-08 |
| lightcyan  | 6638  | JACKSON_DNMT1_TARGETS_UP                       | 7   | 74   | 16179 | 62   | 24.79752 | 1.22E-08 |
| greenyello | 10091 | GSE3982_CENT_MEMORY_CD4_TCELL_VS_NKCELL_DN     | 13  | 181  | 16072 | 150  | 7.782284 | 1.28E-08 |
| lightcyan  | 6760  | ZHU_CMV_8_HR_UP                                | 6   | 43   | 16210 | 62   | 36.57839 | 1.31E-08 |
| turquoise  | 3     | ORGANELLE_PART                                 | 371 | 1130 | 15123 | 4169 | 1.279962 | 1.34E-08 |
| brown      | 10056 | GSE3982_NEUTROPHIL_VS_TH1_UP                   | 51  | 170  | 16083 | 2190 | 2.226438 | 1.40E-08 |
| turquoise  | 8648  | GSE14308_TH17_VS_INDUCED_TREG_UP               | 84  | 189  | 16064 | 4169 | 1.732683 | 1.41E-08 |
| cyan       | 9402  | GSE24026_PD1_LIGATION_VS_CTRL_IN_ACT_TCELL_LIN | 10  | 183  | 16070 | 77   | 11.53431 | 1.46E-08 |
| blue       | 6670  | DEBIASI_APOPTOSIS_BY_REOVIRUS_INFECTION_DN     | 89  | 276  | 15977 | 2978 | 1.759907 | 1.49E-08 |
| lightcyan  | 6792  | DOUGLAS_BMI1_TARGETS_DN                        | 11  | 299  | 15954 | 62   | 9.644136 | 1.50E-08 |
| cyan       | 5782  | NUYTTEN_NIPP1_TARGETS_UP                       | 17  | 683  | 15570 | 77   | 5.25377  | 1.51E-08 |
| lightcyan  | 7818  | BROWNE_HCMV_INFECTION_4HR_UP                   | 6   | 44   | 16209 | 62   | 35.74707 | 1.52E-08 |
| blue       | 80    | NUCLEUS                                        | 322 | 1333 | 14920 | 2978 | 1.318362 | 1.60E-08 |
| cyan       | 5531  | BOWIE_RESPONSE_TO_TAMOXIFEN                    | 5   | 18   | 16235 | 77   | 58.63276 | 1.71E-08 |
| lightgreen | 8450  | GSE11057_EFF_MEM_VS_CENT_MEM_CD4_TCELL_UP      | 8   | 181  | 16072 | 42   | 17.10392 | 1.73E-08 |
| greenyello | 2689  | GNF2_RAB7L1                                    | 7   | 33   | 16220 | 150  | 22.98404 | 1.73E-08 |
| turquoise  | 5785  | NUYTTEN_EZH2_TARGETS_DN                        | 328 | 984  | 15269 | 4169 | 1.299512 | 1.76E-08 |
| cyan       | 9459  | GSE24634_IL4_VS_CTRL_TREATED_NAIVE_CD4_TCELL_  | 10  | 187  | 16066 | 77   | 11.28759 | 1.80E-08 |
| turquoise  | 5100  | KIM_WT1_TARGETS_DN                             | 166 | 443  | 15810 | 4169 | 1.460851 | 1.82E-08 |
| lightgreen | 7333  | CHAN_INTERFERON_PRODUCING_DENDRITIC_CELL       | 4   | 12   | 16241 | 42   | 128.9921 | 1.88E-08 |

|             |                                                    |     |      |       |      |          |          |
|-------------|----------------------------------------------------|-----|------|-------|------|----------|----------|
| lightyellow | 6349 NAKAJIMA_MAST_CELL                            | 5   | 42   | 16211 | 33   | 58.63276 | 2.03E-08 |
| turquoise   | 5910 BENPORATH_MYC_MAX_TARGETS                     | 260 | 754  | 15499 | 4169 | 1.344323 | 2.11E-08 |
| turquoise   | 8349 STK33_UP                                      | 109 | 265  | 15988 | 4169 | 1.603549 | 2.12E-08 |
| lightcyan   | 9503 GSE2706_UNSTIM_VS_2H_LPS_DC_DN                | 9   | 177  | 16076 | 62   | 13.32941 | 2.17E-08 |
| yellow      | 7137 GRADE_COLON_CANCER_UP                         | 118 | 812  | 15441 | 1426 | 1.656304 | 2.25E-08 |
| lightcyan   | 5812 HASEGAWA_TUMORIGENESIS_BY_RET_C634R           | 4   | 9    | 16244 | 62   | 116.509  | 2.38E-08 |
| turquoise   | 4323 REACTOME_GENERIC_TRANSCRIPTION_PATHWAY        | 127 | 321  | 15932 | 4169 | 1.542412 | 2.42E-08 |
| lightcyan   | 7417 COLINA_TARGETS_OF_4EBP1_AND_4EBP2             | 11  | 315  | 15938 | 62   | 9.154275 | 2.57E-08 |
| greenyello  | 4919 DEURIG_T_CELL_PROLYMPHOCYTIC_LEUKEMIA_DN      | 16  | 308  | 15945 | 150  | 5.628745 | 2.61E-08 |
| red         | 4976 SMIRNOV_CIRCULATING_ENDOTHELIOCYTES_IN_CANC   | 21  | 155  | 16098 | 524  | 4.202327 | 2.70E-08 |
| turquoise   | 5783 NUYTEN_NIPP1_TARGETS_DN                       | 270 | 790  | 15463 | 4169 | 1.332411 | 2.84E-08 |
| pink        | 6174 ROSS_AML_OF_FAB_M7_TYPE                       | 10  | 67   | 16186 | 228  | 10.63957 | 2.99E-08 |
| salmon      | 9971 GSE3982_EOSINOPHIL_VS_MAST_CELL_DN            | 12  | 190  | 16063 | 127  | 8.082719 | 3.07E-08 |
| pink        | 8074 STEINER_ERYTHROCYTE_MEMBRANE_GENES            | 6   | 15   | 16238 | 228  | 28.51404 | 3.21E-08 |
| lightgreen  | 9374 GSE22886_NAIVE_CD8_TCELL_VS_MONOCYTE_UP       | 8   | 196  | 16057 | 42   | 15.79495 | 3.22E-08 |
| salmon      | 7320 NUTT_GBM_VS_AO_GLIOMA_DN                      | 7   | 42   | 16211 | 127  | 21.3294  | 3.24E-08 |
| lightcyan   | 9825 GSE360_DC_VS_MAC_B_MALAYI_HIGH_DOSE_DN        | 9   | 186  | 16067 | 62   | 12.68444 | 3.34E-08 |
| red         | 10271 GSE9988_ANTI_TREM1_VS_LOW_LPS_MONOCYTE_DN    | 23  | 186  | 16067 | 524  | 3.835457 | 3.40E-08 |
| lightcyan   | 6604 ZHANG_ANTIVIRAL_RESPONSE_TO_RIBAVIRIN_UP      | 5   | 25   | 16228 | 62   | 52.42903 | 3.43E-08 |
| lightcyan   | 8567 GSE13484_3H_UNSTIM_VS_YF17D_VACCINE_STIM_PB   | 9   | 187  | 16066 | 62   | 12.61661 | 3.50E-08 |
| red         | 6626 MCLACHLAN_DENTAL_CARIES_DN                    | 25  | 218  | 16035 | 524  | 3.557016 | 3.96E-08 |
| lightcyan   | 8807 GSE15930_STIM_VS_STIM_AND_TRICHOSTATINA_48H   | 9   | 190  | 16063 | 62   | 12.4174  | 4.01E-08 |
| lightcyan   | 9715 GSE30083_SP1_VS_SP4_THYMOCYTE_DN              | 9   | 190  | 16063 | 62   | 12.4174  | 4.01E-08 |
| magenta     | 10068 GSE3982_BCELL_VS_TH1_UP                      | 13  | 179  | 16074 | 167  | 7.068176 | 4.06E-08 |
| brown       | 10054 GSE3982_NEUTROPHIL_VS_NKCELL_UP              | 54  | 190  | 16063 | 2190 | 2.109257 | 4.16E-08 |
| blue        | 2334 MORF_RRM1                                     | 42  | 101  | 16152 | 2978 | 2.269534 | 4.49E-08 |
| pink        | 2250 GATAAGR_V\$GATA_C                             | 16  | 210  | 16043 | 228  | 5.431245 | 4.56E-08 |
| lightcyan   | 9457 GSE24634_IL4_VS_CTRL_TREATED_NAIVE_CD4_TCELL  | 9   | 193  | 16060 | 62   | 12.22439 | 4.59E-08 |
| greenyello  | 7333 CHAN_INTERFERON_PRODUCING_DENDRITIC_CELL      | 5   | 12   | 16241 | 150  | 45.14722 | 4.71E-08 |
| lightcyan   | 9451 GSE24634_TEFF_VS_TCONV_DAY5_IN_CULTURE_DN     | 9   | 194  | 16059 | 62   | 12.16137 | 4.80E-08 |
| turquoise   | 5782 NUYTEN_NIPP1_TARGETS_UP                       | 237 | 683  | 15570 | 4169 | 1.352787 | 5.02E-08 |
| cyan        | 7326 ZHANG_INTERFERON_RESPONSE                     | 5   | 22   | 16231 | 77   | 47.97226 | 5.17E-08 |
| red         | 118 INTEGRAL_TO_MEMBRANE                           | 66  | 1025 | 15228 | 524  | 1.997204 | 5.25E-08 |
| salmon      | 10126 GSE6269_HEALTHY_VS_FLU_INF_PBMUC_UP          | 11  | 161  | 16092 | 127  | 8.743728 | 5.29E-08 |
| blue        | 10130 GSE6269_HEALTHY_VS_STREP_AUREUS_INF_PBMUC_UP | 63  | 179  | 16074 | 2978 | 1.920863 | 5.40E-08 |
| pink        | 8041 JUBAN_TARGETS_OF_SPI1_AND_FLI1_UP             | 12  | 112  | 16141 | 228  | 7.637688 | 5.59E-08 |
| cyan        | 6582 ZHU_CMV_ALL_UP                                | 8   | 112  | 16141 | 77   | 15.07699 | 5.60E-08 |
| red         | 5013 TAKEDA_TARGETS_OF_NUP98_HOXA9_FUSION_8D_DN    | 23  | 191  | 16062 | 524  | 3.735053 | 5.61E-08 |
| magenta     | 8504 GSE12845_IGD_POS_VS_NEG_BLOOD_BCELL_UP        | 13  | 184  | 16069 | 167  | 6.876106 | 5.62E-08 |
| purple      | 8160 ACEVEDO_FGFR1_TARGETS_IN_PROSTATE_CANCER_M    | 14  | 233  | 16020 | 157  | 6.220224 | 5.97E-08 |
| cyan        | 9201 GSE17974_IL4_AND_ANTI_IL12_VS_UNTREATED_48H   | 9   | 159  | 16094 | 77   | 11.94781 | 5.98E-08 |
| cyan        | 9247 GSE18791_UNSTIM_VS_NEWCATSLE_VIRUS_DC_18H_I   | 9   | 159  | 16094 | 77   | 11.94781 | 5.98E-08 |
| lightcyan   | 6490 CHANG_IMMORTALIZED_BY_HPV31_DN                | 6   | 55   | 16198 | 62   | 28.59765 | 6.03E-08 |
| brown       | 9944 GSE37416_12H_VS_24H_F_TULARENSIS_LVS_NEUTROI  | 55  | 197  | 16056 | 2190 | 2.071982 | 6.08E-08 |
| brown       | 8580 GSE13485_CTRL_VS_DAY21_YF17D_VACCINE_PBMUC_U  | 54  | 192  | 16061 | 2190 | 2.087286 | 6.11E-08 |
| red         | 9455 GSE24634_TEFF_VS_TCONV_DAY10_IN_CULTURE_DN    | 23  | 192  | 16061 | 524  | 3.715599 | 6.18E-08 |
| turquoise   | 2159 ATTCTTT,MIR-186                               | 95  | 227  | 16026 | 4169 | 1.631546 | 6.27E-08 |
| turquoise   | 9638 GSE29615_CTRL_VS_DAY3_LAIV_IFLU_VACCINE_PBMUC | 74  | 165  | 16088 | 4169 | 1.748435 | 6.35E-08 |
| cyan        | 7843 STAMBOLSKY_TARGETS_OF_MUTATED_TP53_DN         | 6   | 45   | 16208 | 77   | 28.14372 | 6.52E-08 |
| greenyello  | 2664 GNF2_MATK                                     | 6   | 24   | 16229 | 150  | 27.08833 | 6.56E-08 |
| pink        | 1874 V\$GATA_Q6                                    | 13  | 137  | 16116 | 228  | 6.764278 | 6.67E-08 |
| red         | 9891 GSE36392_TYPE_2_MYELOID_VS_EOSINOPHIL_IL25_TR | 22  | 178  | 16075 | 524  | 3.833583 | 6.83E-08 |
| turquoise   | 2140 TGCTTTG,MIR-330                               | 109 | 270  | 15983 | 4169 | 1.573854 | 6.87E-08 |
| lightcyan   | 4645 REACTOME_INTERFERON_GAMMA_SIGNALING           | 6   | 57   | 16196 | 62   | 27.59423 | 7.50E-08 |
| lightcyan   | 7242 TSAI_RESPONSE_TO_RADIATION_THERAPY            | 5   | 29   | 16224 | 62   | 45.19744 | 7.58E-08 |
| turquoise   | 2048 TAGCTTT,MIR-9                                 | 84  | 195  | 16058 | 4169 | 1.67937  | 7.86E-08 |
| turquoise   | 8415 GSE10239_MEMORY_VS_KLRG1HIGH_EFF_CD8_TCELL    | 85  | 198  | 16055 | 4169 | 1.673614 | 7.94E-08 |
| brown       | 7922 PILON_KLF1_TARGETS_DN                         | 340 | 1952 | 14301 | 2190 | 1.292673 | 7.94E-08 |
| red         | 8453 GSE11057_CD4_EFF_MEM_VS_PBMUC_DN              | 23  | 195  | 16058 | 524  | 3.658436 | 8.25E-08 |
| lightcyan   | 4664 REACTOME_RIG_I_MDA5_MEDIATED_INDUCATION_OF    | 6   | 58   | 16195 | 62   | 27.11846 | 8.34E-08 |

|            |                                                      |     |      |       |      |          |          |
|------------|------------------------------------------------------|-----|------|-------|------|----------|----------|
| magenta    | 7571 MIKKELSEN_MEF_ICP_WITH_H3K27ME3                 | 11  | 128  | 16125 | 167  | 8.363726 | 8.36E-08 |
| red        | 6240 BROWN_MYELOID_CELL_DEVELOPMENT_UP               | 20  | 151  | 16102 | 524  | 4.108235 | 8.51E-08 |
| magenta    | 8828 GSE17580_UNINFECTED_VS_S_MANSONI_INF_TEFF_UI    | 13  | 191  | 16062 | 167  | 6.624103 | 8.72E-08 |
| magenta    | 9675 GSE29618_MONOCYTE_VS_MDC_DAY7_FLU_VACCINE_      | 13  | 191  | 16062 | 167  | 6.624103 | 8.72E-08 |
| lightcyan  | 1866 V\$IRF_Q6                                       | 9   | 208  | 16045 | 62   | 11.34282 | 8.74E-08 |
| turquoise  | 1947 TGTTTAC,MIR-30A-5P,MIR-30C,MIR-30D,MIR-30B,MIR- | 185 | 514  | 15739 | 4169 | 1.40317  | 8.74E-08 |
| lightgreen | 5115 JAATINEN_HEMATOPOIETIC_STEM_CELL_DN             | 8   | 223  | 16030 | 42   | 13.88255 | 8.75E-08 |
| brown      | 9938 GSE37416_0H_VS_12H_F_TULARENSIS_LVS_NEUTROPI    | 54  | 194  | 16059 | 2190 | 2.065768 | 8.92E-08 |
| red        | 41 INTRINSIC_TO_MEMBRANE                             | 66  | 1041 | 15212 | 524  | 1.966507 | 9.38E-08 |
| turquoise  | 9493 GSE26928_EFF_MEM_VS_CENTR_MEM_CD4_TCELL_DI      | 68  | 149  | 16104 | 4169 | 1.779198 | 9.40E-08 |
| red        | 59 MEMBRANE                                          | 90  | 1601 | 14652 | 524  | 1.743626 | 9.75E-08 |
| red        | 5183 DELYS_THYROID_CANCER_UP                         | 34  | 383  | 15870 | 524  | 2.753483 | 9.78E-08 |
| magenta    | 9664 GSE29618_PDC_VS_MDC_UP                          | 13  | 193  | 16060 | 167  | 6.555459 | 9.86E-08 |
| magenta    | 9676 GSE29618_PDC_VS_MDC_DAY7_FLU_VACCINE_UP         | 13  | 193  | 16060 | 167  | 6.555459 | 9.86E-08 |
| blue       | 6761 WELCSH_BRCA1_TARGETS_DN                         | 51  | 136  | 16117 | 2978 | 2.046634 | 9.95E-08 |
| turquoise  | 5733 SPIELMAN_LYMPHOBLAST_EUROPEAN_VS_ASIAN_DN       | 205 | 581  | 15672 | 4169 | 1.375559 | 1.00E-07 |
| red        | 225 PLASMA_MEMBRANE_PART                             | 58  | 867  | 15386 | 524  | 2.074967 | 1.02E-07 |
| turquoise  | 9931 GSE37416_CTRL_VS_24H_F_TULARENSIS_LVS_NEUTRO    | 85  | 199  | 16054 | 4169 | 1.665204 | 1.04E-07 |
| brown      | 7855 VERHAAK_GLIOMASTOMA_NEURAL                      | 55  | 200  | 16053 | 2190 | 2.040902 | 1.06E-07 |
| lightcyan  | 8129 BOSCO_TH1_CYTOTOXIC_MODULE                      | 7   | 101  | 16152 | 62   | 18.16848 | 1.08E-07 |
| red        | 9677 GSE29618_PDC_VS_MDC_DAY7_FLU_VACCINE_DN         | 23  | 198  | 16055 | 524  | 3.603005 | 1.09E-07 |
| red        | 10234 GSE9006_TYPE_1_DIABETES_AT_DX_VS_4MONTH_POS    | 23  | 198  | 16055 | 524  | 3.603005 | 1.09E-07 |
| blue       | 9976 GSE3982_EOSINOPHIL_VS_NEUTROPHIL_UP             | 64  | 186  | 16067 | 2978 | 1.877915 | 1.11E-07 |
| purple     | 4521 REACTOME_FORMATION_OF_FIBRIN_CLOT_CLOTTING_     | 6   | 25   | 16228 | 157  | 24.84535 | 1.12E-07 |
| red        | 10015 GSE3982_DC_VS_NEUTROPHIL_DN                    | 22  | 183  | 16070 | 524  | 3.728841 | 1.12E-07 |
| lightcyan  | 6098 JECHLINGER_EPITHELIAL_TO_MESENCHYMAL_TRANSIT    | 6   | 61   | 16192 | 62   | 25.78477 | 1.13E-07 |
| salmon     | 2378 MORF_DEK                                        | 13  | 259  | 15994 | 127  | 6.423525 | 1.20E-07 |
| red        | 9665 GSE29618_PDC_VS_MDC_DN                          | 23  | 199  | 16054 | 524  | 3.5849   | 1.20E-07 |
| greenyello | 7831 LI_INDUCED_T_TO_NATURAL_KILLER_UP               | 15  | 300  | 15953 | 150  | 5.417667 | 1.20E-07 |
| turquoise  | 5809 WEI_MYCN_TARGETS_WITH_E_BOX                     | 256 | 754  | 15499 | 4169 | 1.323641 | 1.25E-07 |
| blue       | 9653 GSE29617_DAY3_VS_DAY7_TIV_FLU_VACCINE_PBMCD     | 60  | 171  | 16082 | 2978 | 1.914979 | 1.26E-07 |
| lightcyan  | 7601 TSAI_DNAJB4_TARGETS_UP                          | 4   | 13   | 16240 | 62   | 80.66005 | 1.34E-07 |
| magenta    | 3607 MODULE_119                                      | 11  | 134  | 16119 | 167  | 7.98923  | 1.34E-07 |
| red        | 10056 GSE3982_NEUTROPHIL_VS_TH1_UP                   | 21  | 170  | 16083 | 524  | 3.831533 | 1.37E-07 |
| turquoise  | 62 CYTOPLASM                                         | 595 | 1950 | 14303 | 4169 | 1.189554 | 1.43E-07 |
| red        | 6287 HESS_TARGETS_OF_HOXA9_AND_MEIS1_DN              | 14  | 77   | 16176 | 524  | 5.639486 | 1.43E-07 |
| salmon     | 29 RIBONUCLEOPROTEIN_COMPLEX                         | 10  | 140  | 16113 | 127  | 9.14117  | 1.44E-07 |
| purple     | 3131 chr4q12                                         | 6   | 26   | 16227 | 157  | 23.88976 | 1.45E-07 |
| turquoise  | 1958 TGCACTT,MIR-519C,MIR-519B,MIR-519A              | 145 | 387  | 15866 | 4169 | 1.460692 | 1.45E-07 |
| red        | 6820 CREIGHTON_ENDOCRINE_THERAPY_RESISTANCE_3        | 47  | 644  | 15609 | 524  | 2.263676 | 1.50E-07 |
| turquoise  | 2112 ACTTTAT,MIR-142-5P                              | 102 | 252  | 16001 | 4169 | 1.577979 | 1.54E-07 |
| brown      | 10285 GSE9988_LPS_VS_VEHICLE_TREATED_MONOCYTE_DN     | 54  | 197  | 16056 | 2190 | 2.034309 | 1.55E-07 |
| cyan       | 9235 GSE18791_CTRL_VS_NEWCASTLE_VIRUS_DC_16H_DN      | 9   | 178  | 16075 | 77   | 10.67248 | 1.58E-07 |
| cyan       | 9977 GSE3982_EOSINOPHIL_VS_NEUTROPHIL_DN             | 9   | 178  | 16075 | 77   | 10.67248 | 1.58E-07 |
| brown      | 9984 GSE3982_EOSINOPHIL_VS_CENT_MEMORY_CD4_TCELL     | 52  | 187  | 16066 | 2190 | 2.063722 | 1.59E-07 |
| turquoise  | 2442 MORF_PPP6C                                      | 51  | 103  | 16150 | 4169 | 1.930343 | 1.61E-07 |
| red        | 9354 GSE22886_NEUTROPHIL_VS_MONOCYTE_UP              | 18  | 129  | 16124 | 524  | 4.327978 | 1.70E-07 |
| turquoise  | 6792 DOUGLAS_BMI1_TARGETS_DN                         | 117 | 299  | 15954 | 4169 | 1.525514 | 1.71E-07 |
| salmon     | 5732 SPIELMAN_LYMPHOBLAST_EUROPEAN_VS_ASIAN_UP       | 17  | 475  | 15778 | 127  | 4.580207 | 1.72E-07 |
| red        | 826 RESPONSE_TO_EXTERNAL_STIMULUS                    | 25  | 235  | 16018 | 524  | 3.2997   | 1.73E-07 |
| cyan       | 7498 JISON_SICKLE_CELL_DISEASE_UP                    | 9   | 180  | 16073 | 77   | 10.5539  | 1.73E-07 |
| blue       | 7655 CAIRO_HEPATOBLASTOMA_CLASSES_UP                 | 158 | 591  | 15662 | 2978 | 1.459078 | 1.78E-07 |
| lightgreen | 3052 BIOCARTA_NKCELLS_PATHWAY                        | 4   | 20   | 16233 | 42   | 77.39524 | 1.81E-07 |
| turquoise  | 5745 PUJANA_CHEK2_PCC_NETWORK                        | 256 | 757  | 15496 | 4169 | 1.318396 | 1.82E-07 |
| turquoise  | 8348 STK33_SKM_UP                                    | 104 | 259  | 15994 | 4169 | 1.565436 | 1.86E-07 |
| lightcyan  | 6068 GRANDVAUX_IFN_RESPONSE_NOT_VIA_IRF3             | 4   | 14   | 16239 | 62   | 74.89862 | 1.87E-07 |
| lightgreen | 3419 chr12p13                                        | 7   | 164  | 16089 | 42   | 16.51728 | 1.88E-07 |
| brown      | 9447 GSE24634_TREG_VS_TCONV_POST_DAY10_IL4_CONVE     | 53  | 193  | 16060 | 2190 | 2.038018 | 1.89E-07 |
| brown      | 9977 GSE3982_EOSINOPHIL_VS_NEUTROPHIL_DN             | 50  | 178  | 16075 | 2190 | 2.08468  | 1.94E-07 |
| purple     | 6162 TENEDINI_MEGAKARYOCYTE_MARKERS                  | 8   | 65   | 16188 | 157  | 12.74121 | 2.01E-07 |

|            |       |                                                 |     |      |       |      |          |          |
|------------|-------|-------------------------------------------------|-----|------|-------|------|----------|----------|
| greenyello | 10186 | GSE7764_NKCELL_VS_SPLENOCYTE_UP                 | 12  | 191  | 16062 | 150  | 6.807539 | 2.06E-07 |
| cyan       | 9761  | GSE3337_CTRL_VS_4H_IFNG_IN_CD8POS_DC_DN         | 9   | 184  | 16069 | 77   | 10.32446 | 2.09E-07 |
| magenta    | 3793  | MODULE_345                                      | 10  | 111  | 16142 | 167  | 8.76787  | 2.11E-07 |
| turquoise  | 1948  | GTGCAAT,MIR-25,MIR-32,MIR-92,MIR-363,MIR-367    | 108 | 272  | 15981 | 4169 | 1.547948 | 2.14E-07 |
| purple     | 5051  | TONKS_TARGETS_OF_RUNX1_RUNX1T1_FUSION_ERYTI     | 5   | 15   | 16238 | 157  | 34.50743 | 2.19E-07 |
| lightcyan  | 6582  | ZHU_CMV_ALL_UP                                  | 7   | 112  | 16141 | 62   | 16.38407 | 2.20E-07 |
| lightcyan  | 8299  | MEL18_DN.V1_DN                                  | 7   | 112  | 16141 | 62   | 16.38407 | 2.20E-07 |
| blue       | 4801  | PARENT_MTOR_SIGNALING_UP                        | 144 | 530  | 15723 | 2978 | 1.482844 | 2.25E-07 |
| cyan       | 6341  | BENNETT_SYSTEMIC_LUPUS_ERYTHEMATOSUS            | 5   | 29   | 16224 | 77   | 36.39275 | 2.27E-07 |
| turquoise  | 8969  | GSE17721_CPG_VS_GARDIQUIMOD_1H_BMDM_DN          | 82  | 193  | 16060 | 4169 | 1.656373 | 2.28E-07 |
| turquoise  | 80    | NUCLEUS                                         | 421 | 1333 | 14920 | 4169 | 1.231271 | 2.29E-07 |
| turquoise  | 9738  | GSE31082_DP_VS_CD8_SP_THYMOCYTE_UP              | 83  | 196  | 16057 | 4169 | 1.650911 | 2.29E-07 |
| purple     | 6088  | GNATENKO_PLATELET_SIGNATURE                     | 7   | 45   | 16208 | 157  | 16.10347 | 2.29E-07 |
| lightcyan  | 8000  | FEVR_CTNNB1_TARGETS_UP                          | 13  | 582  | 15671 | 62   | 5.855476 | 2.31E-07 |
| salmon     | 4828  | ONKEN_UVEAL_MELANOMA_DN                         | 17  | 486  | 15767 | 127  | 4.47654  | 2.38E-07 |
| cyan       | 8567  | GSE13484_3H_UNSTIM_VS_YF17D_VACCINE_STIM_PB     | 9   | 187  | 16066 | 77   | 10.15883 | 2.40E-07 |
| greenyello | 7668  | HAHTOLA_CTCL_PATHOGENESIS                       | 5   | 16   | 16237 | 150  | 33.86042 | 2.52E-07 |
| magenta    | 4973  | VECCHI_GASTRIC_CANCER_EARLY_DN                  | 14  | 246  | 16007 | 167  | 5.538727 | 2.52E-07 |
| salmon     | 2542  | GCM_PPP1CC                                      | 7   | 56   | 16197 | 127  | 15.99705 | 2.54E-07 |
| magenta    | 9330  | GSE22886_NAIVE_VS_IGM_MEMORY_BCELL_UP           | 12  | 175  | 16078 | 167  | 6.673601 | 2.57E-07 |
| brown      | 7418  | CHEN_METABOLIC_SYNDROM_NETWORK                  | 205 | 1094 | 15159 | 2190 | 1.390676 | 2.63E-07 |
| lightcyan  | 9713  | GSE30083_SP1_VS_SP3_THYMOCYTE_DN                | 8   | 171  | 16082 | 62   | 12.2641  | 2.66E-07 |
| magenta    | 5976  | MORI_MATURE_B_LYMPHOCYTE_UP                     | 9   | 87   | 16166 | 167  | 10.06793 | 2.66E-07 |
| blue       | 2336  | MORF_SMC1L1                                     | 29  | 62   | 16191 | 2978 | 2.55279  | 2.70E-07 |
| greenyello | 9374  | GSE22886_NAIVE_CD8_TCELL_VS_MONOCYTE_UP         | 12  | 196  | 16057 | 150  | 6.633878 | 2.73E-07 |
| magenta    | 9635  | GSE29614_CTRL_VS_DAY7_TIV_FLU_VACCINE_PBMC_I    | 12  | 176  | 16077 | 167  | 6.635683 | 2.73E-07 |
| greenyello | 4565  | REACTOME_GPCR_LIGAND_BINDING                    | 13  | 235  | 16018 | 150  | 5.994014 | 2.76E-07 |
| cyan       | 8385  | HECKER_IFNB1_TARGETS                            | 7   | 93   | 16160 | 77   | 15.88759 | 2.77E-07 |
| purple     | 8385  | HECKER_IFNB1_TARGETS                            | 9   | 93   | 16160 | 157  | 10.01829 | 2.80E-07 |
| turquoise  | 7395  | LEE_RECENT_THYMIC_EMIGRANT                      | 90  | 218  | 16035 | 4169 | 1.609488 | 2.88E-07 |
| turquoise  | 2320  | MORF_PSMC1                                      | 80  | 188  | 16065 | 4169 | 1.658952 | 2.95E-07 |
| turquoise  | 6637  | WELCSH_BRCA1_TARGETS_UP                         | 80  | 188  | 16065 | 4169 | 1.658952 | 2.95E-07 |
| turquoise  | 1998  | ATGTAA,MIR-302C                                 | 86  | 206  | 16047 | 4169 | 1.627544 | 2.95E-07 |
| turquoise  | 10202 | GSE7852_THYMUS_VS_FAT_TREG_UP                   | 83  | 197  | 16056 | 4169 | 1.642531 | 2.97E-07 |
| purple     | 7371  | SWEET_LUNG_CANCER_KRAS_DN                       | 16  | 351  | 15902 | 157  | 4.718965 | 2.98E-07 |
| red        | 10149 | GSE7400_CTRL_VS_CSF3_IN_VIVO_TREATED_PBMC_DI    | 21  | 178  | 16075 | 524  | 3.65933  | 3.00E-07 |
| salmon     | 9675  | GSE29618_MONOCYTE_VS_MDC_DAY7_FLU_VACCINE_      | 11  | 191  | 16062 | 127  | 7.370367 | 3.01E-07 |
| pink       | 5045  | TONKS_TARGETS_OF_RUNX1_RUNX1T1_FUSION_HSC_      | 14  | 183  | 16070 | 228  | 5.453504 | 3.08E-07 |
| red        | 9787  | GSE34205_HEALTHY_VS_RSV_INF_INFANT_PBMC_DN      | 22  | 194  | 16059 | 524  | 3.517412 | 3.15E-07 |
| turquoise  | 4952  | HORIUCHI_WTAP_TARGETS_DN                        | 117 | 302  | 15951 | 4169 | 1.51036  | 3.15E-07 |
| cyan       | 8064  | YANG_BCL3_TARGETS_UP                            | 11  | 322  | 15931 | 77   | 7.210736 | 3.24E-07 |
| pink       | 7973  | VANDESLUIS_NORMAL_EMBRYOS_DN                    | 6   | 21   | 16232 | 228  | 20.36717 | 3.25E-07 |
| blue       | 239   | RNA_METABOLIC_PROCESS                           | 193 | 757  | 15496 | 2978 | 1.391459 | 3.26E-07 |
| salmon     | 5915  | STARK_PREFRONTAL_CORTEX_22Q11_DELETION_DN       | 17  | 498  | 15755 | 127  | 4.368672 | 3.35E-07 |
| turquoise  | 1960  | CAGTATT,MIR-200B,MIR-200C,MIR-429               | 150 | 408  | 15845 | 4169 | 1.433286 | 3.41E-07 |
| cyan       | 8621  | GSE14000_UNSTIM_VS_16H_LPS_DC_DN                | 9   | 195  | 16058 | 77   | 9.742058 | 3.42E-07 |
| brown      | 7351  | RUTELLA_RESPONSE_TO_HGF_VS_CSF2RB_AND_IL4_U     | 90  | 398  | 15855 | 2190 | 1.67822  | 3.43E-07 |
| magenta    | 7380  | HOFFMANN_SMALL_PRE_BII_TO_IMMATURE_B_LYMP       | 8   | 66   | 16187 | 167  | 11.79677 | 3.64E-07 |
| blue       | 1220  | HELICASE_ACTIVITY                               | 25  | 50   | 16203 | 2978 | 2.728845 | 3.64E-07 |
| red        | 10074 | GSE3982_BASOPHIL_VS_CENT_MEMORY_CD4_TCELL_U     | 22  | 196  | 16057 | 524  | 3.48152  | 3.77E-07 |
| lightcyan  | 5149  | GOZGIT_ESR1_TARGETS_DN                          | 13  | 608  | 15645 | 62   | 5.605077 | 3.80E-07 |
| turquoise  | 6463  | RAMALHO_STEMNESS_UP                             | 84  | 201  | 16052 | 4169 | 1.629239 | 3.83E-07 |
| red        | 3535  | MODULE_46                                       | 30  | 332  | 15921 | 524  | 2.802757 | 3.84E-07 |
| purple     | 3553  | MODULE_64                                       | 17  | 404  | 15849 | 157  | 4.356136 | 3.84E-07 |
| blue       | 10039 | GSE3982_MAC_VS_CENT_MEMORY_CD4_TCELL_DN         | 60  | 176  | 16077 | 2978 | 1.860576 | 3.94E-07 |
| salmon     | 8578  | GSE13485_CTRL_VS_DAY7_YF17D_VACCINE_PBMC_UP     | 10  | 156  | 16097 | 127  | 8.203614 | 3.97E-07 |
| magenta    | 3605  | MODULE_117                                      | 19  | 472  | 15781 | 167  | 3.917677 | 4.00E-07 |
| turquoise  | 2180  | TAATGTG,MIR-323                                 | 65  | 145  | 16108 | 4169 | 1.74762  | 4.01E-07 |
| turquoise  | 1944  | GCACTTT,MIR-17-5P,MIR-20A,MIR-106A,MIR-106B,MIR | 188 | 534  | 15719 | 4169 | 1.372519 | 4.05E-07 |
| red        | 10046 | GSE3982_NEUTROPHIL_VS_BCELL_UP                  | 20  | 166  | 16087 | 524  | 3.737009 | 4.09E-07 |

|            |                                                     |     |      |       |      |          |          |
|------------|-----------------------------------------------------|-----|------|-------|------|----------|----------|
| blue       | 8444 GSE11057_NAIVE_VS_EFF_MEMORY_CD4_TCELL_UP      | 64  | 192  | 16061 | 2978 | 1.81923  | 4.11E-07 |
| salmon     | 10135 GSE6269_FLU_VS_E_COLI_INF_PBMCDN              | 9   | 120  | 16133 | 127  | 9.598228 | 4.11E-07 |
| brown      | 2709 GNF2_TNFRSF1B                                  | 25  | 65   | 16188 | 2190 | 2.854408 | 4.21E-07 |
| magenta    | 6195 LU_IL4_SIGNALING                               | 9   | 92   | 16161 | 167  | 9.520763 | 4.31E-07 |
| brown      | 2656 GNF2_ITGB2                                     | 23  | 57   | 16196 | 2190 | 2.994625 | 4.43E-07 |
| turquoise  | 2104 TTTGTAG,MIR-520D                               | 112 | 288  | 15965 | 4169 | 1.516098 | 4.48E-07 |
| salmon     | 143 RIBOSOME                                        | 6   | 38   | 16215 | 127  | 20.2068  | 4.55E-07 |
| red        | 6794 KRIGE_RESPONSE_TO_TOSEDOSTAT_6HR_UP            | 59  | 929  | 15324 | 524  | 1.969874 | 4.56E-07 |
| brown      | 9677 GSE29618_PDC_VS_MDC_DAY7_FLU_VACCINE_DN        | 53  | 198  | 16055 | 2190 | 1.986553 | 4.58E-07 |
| red        | 7858 HIRSCH_CELLULAR_TRANSFORMATION_SIGNATURE_UP    | 24  | 231  | 16022 | 524  | 3.222564 | 4.72E-07 |
| red        | 9369 GSE22886_NAIVE_BCELL_VS_MONOCYTE_DN            | 22  | 199  | 16054 | 524  | 3.429034 | 4.91E-07 |
| turquoise  | 9933 GSE37416_CTRL_VS_48H_F_TULARENSIS_LVS_NEUTRO   | 82  | 196  | 16057 | 4169 | 1.631021 | 4.96E-07 |
| blue       | 10023 GSE3982_DC_VS_CENT_MEMORY_CD4_TCELL_DN        | 61  | 181  | 16072 | 2978 | 1.839332 | 4.97E-07 |
| yellow     | 5175 ENK_UV_RESPONSE_KERATINOCYTE_UP                | 74  | 470  | 15783 | 1426 | 1.794518 | 4.98E-07 |
| magenta    | 7487 VALK_AML_CLUSTER_10                            | 6   | 30   | 16223 | 167  | 19.46467 | 5.21E-07 |
| purple     | 3495 MODULE_2                                       | 15  | 321  | 15932 | 157  | 4.83749  | 5.21E-07 |
| lightgreen | 8389 KAECH_NAIVE_VS_DAY15_EFF_CD8_TCELL_DN          | 7   | 191  | 16062 | 42   | 14.18237 | 5.28E-07 |
| lightgreen | 2717 GNF2_ZAP70                                     | 4   | 26   | 16227 | 42   | 59.5348  | 5.53E-07 |
| magenta    | 8393 KAECH_DAY8_EFF_VS_DAY15_EFF_CD8_TCELL_DN       | 12  | 188  | 16065 | 167  | 6.212129 | 5.56E-07 |
| brown      | 10022 GSE3982_DC_VS_CENT_MEMORY_CD4_TCELL_UP        | 52  | 194  | 16059 | 2190 | 1.989258 | 5.59E-07 |
| greenyello | 5908 BENPORATH_PRC2_TARGETS                         | 15  | 339  | 15914 | 150  | 4.794395 | 5.76E-07 |
| red        | 227 PLASMA_MEMBRANE                                 | 66  | 1095 | 15158 | 524  | 1.869528 | 5.89E-07 |
| turquoise  | 2103 ACCAAAG,MIR-9                                  | 160 | 444  | 15809 | 4169 | 1.404878 | 5.93E-07 |
| lightcyan  | 8235 WNT_UP.V1_DN                                   | 7   | 130  | 16123 | 62   | 14.11551 | 6.07E-07 |
| lightcyan  | 4872 SENGUPTA_NASOPHARYNGEAL_CARCINOMA_WITH_LN      | 10  | 342  | 15911 | 62   | 7.665063 | 6.08E-07 |
| lightgreen | 10255 GSE9650_NAIVE_VS_EFF_CD8_TCELL_DN             | 7   | 195  | 16058 | 42   | 13.89145 | 6.08E-07 |
| salmon     | 2678 GNF2_NS                                        | 6   | 40   | 16213 | 127  | 19.19646 | 6.24E-07 |
| brown      | 2622 GNF2_CD53                                      | 23  | 58   | 16195 | 2190 | 2.942993 | 6.42E-07 |
| turquoise  | 8986 GSE17721_LPS_VS_PAM3CSK4_1H_BMDM_UP            | 79  | 188  | 16065 | 4169 | 1.638215 | 6.44E-07 |
| green      | 4787 REACTOME_GAP_JUNCTION_ASSEMBLY                 | 7   | 9    | 16244 | 1305 | 9.68676  | 6.60E-07 |
| red        | 4954 GAL_LEUKEMIC_STEM_CELL_DN                      | 23  | 219  | 16034 | 524  | 3.257512 | 6.76E-07 |
| blue       | 307 BIOPOLYMER_METABOLIC_PROCESS                    | 352 | 1529 | 14724 | 2978 | 1.256447 | 6.81E-07 |
| red        | 9984 GSE3982_EOSINOPHIL_VS_CENT_MEMORY_CD4_TCELL    | 21  | 187  | 16066 | 524  | 3.483212 | 6.88E-07 |
| salmon     | 2311 MORF_HDAC1                                     | 12  | 253  | 16000 | 127  | 6.070026 | 6.88E-07 |
| lightgreen | 8387 KAECH_NAIVE_VS_DAY8_EFF_CD8_TCELL_DN           | 7   | 199  | 16054 | 42   | 13.61223 | 6.97E-07 |
| purple     | 7704 WONG_ADULT_TISSUE_STEM_MODULE                  | 21  | 629  | 15624 | 157  | 3.456229 | 7.12E-07 |
| red        | 6889 FOSTER_TOLERANT_MACROPHAGE_UP                  | 18  | 142  | 16111 | 524  | 3.931755 | 7.30E-07 |
| grey60     | 5013 TAKEDA_TARGETS_OF_NUP98_HOXA9_FUSION_8D_DN     | 7   | 191  | 16062 | 44   | 13.53772 | 7.36E-07 |
| brown      | 2650 GNF2_ICAM3                                     | 18  | 39   | 16214 | 2190 | 3.42529  | 7.39E-07 |
| magenta    | 4845 SENGUPTA_NASOPHARYNGEAL_CARCINOMA_DN           | 14  | 269  | 15984 | 167  | 5.065156 | 7.43E-07 |
| lightcyan  | 7929 JOHNSTONE_PARVB_TARGETS_2_UP                   | 7   | 134  | 16119 | 62   | 13.69415 | 7.46E-07 |
| lightcyan  | 10146 GSE6566_STRONG_VS_WEAK_DC_STIMULATED_CD4_T    | 7   | 134  | 16119 | 62   | 13.69415 | 7.46E-07 |
| lightcyan  | 8667 GSE1432_1H_VS_24H_IFNG_MICROGLIA_DN            | 8   | 197  | 16056 | 62   | 10.64549 | 7.80E-07 |
| purple     | 3576 MODULE_88                                      | 21  | 633  | 15620 | 157  | 3.434389 | 7.89E-07 |
| red        | 3564 MODULE_76                                      | 12  | 64   | 16189 | 524  | 5.81572  | 7.93E-07 |
| pink       | 6353 RADMACHER_AML_PROGNOSIS                        | 9   | 73   | 16180 | 228  | 8.788572 | 8.00E-07 |
| turquoise  | 5600 DACOSTA_UV_RESPONSE_VIA_ERCC3_COMMON_DN        | 167 | 469  | 15784 | 4169 | 1.388178 | 8.03E-07 |
| lightcyan  | 6881 RIGGINS_TAMOXIFEN_RESISTANCE_DN                | 8   | 198  | 16055 | 62   | 10.59172 | 8.11E-07 |
| magenta    | 9340 GSE22886_IGG_IGA_MEMORY_BCELL_VS_BM_PLASMA/    | 12  | 195  | 16058 | 167  | 5.989129 | 8.21E-07 |
| brown      | 4084 PID_VEGFR1_2_PATHWAY                           | 25  | 67   | 16186 | 2190 | 2.769202 | 8.24E-07 |
| turquoise  | 6869 ZHENG_FOXP3_TARGETS_IN_THYMUS_UP               | 80  | 192  | 16061 | 4169 | 1.62439  | 8.28E-07 |
| turquoise  | 10106 GSE39820_CTRL_VS_TGFBETA1_IL6_IL23A_CD4_TCELL | 80  | 192  | 16061 | 4169 | 1.62439  | 8.28E-07 |
| salmon     | 10235 GSE9006_TYPE_1_DIABETES_AT_DX_VS_4MONTH_POS   | 10  | 169  | 16084 | 127  | 7.572567 | 8.31E-07 |
| lightcyan  | 6169 LEE_LIVER_CANCER_MYC_E2F1_UP                   | 5   | 46   | 16207 | 62   | 28.49404 | 8.33E-07 |
| turquoise  | 2324 MORF_RAD21                                     | 76  | 180  | 16073 | 4169 | 1.646049 | 8.35E-07 |
| cyan       | 9233 GSE18791_CTRL_VS_NEWCASTLE_VIRUS_DC_14H_DN     | 8   | 159  | 16094 | 77   | 10.62027 | 8.35E-07 |
| magenta    | 5974 MORI_IMMATURE_B_LYMPHOCYTE_UP                  | 7   | 51   | 16202 | 167  | 13.35811 | 8.44E-07 |
| turquoise  | 1469 V\$ELK1_02                                     | 95  | 238  | 16015 | 4169 | 1.556139 | 8.53E-07 |
| lightcyan  | 4719 REACTOME_INNATE_IMMUNE_SYSTEM                  | 8   | 200  | 16053 | 62   | 10.48581 | 8.75E-07 |
| magenta    | 2847 KEGG_B_CELL_RECEPTOR_SIGNALING_PATHWAY         | 8   | 74   | 16179 | 167  | 10.52144 | 8.90E-07 |

|            |       |                                               |     |     |       |      |          |          |
|------------|-------|-----------------------------------------------|-----|-----|-------|------|----------|----------|
| purple     | 2830  | KEGG_FOCAL_ADHESION                           | 11  | 172 | 16081 | 157  | 6.620612 | 8.91E-07 |
| purple     | 235   | REGULATION_OF_BIOLOGICAL_QUALITY              | 15  | 335 | 15918 | 157  | 4.635327 | 8.92E-07 |
| cyan       | 3793  | MODULE_345                                    | 7   | 111 | 16142 | 77   | 13.31122 | 9.29E-07 |
| red        | 5115  | JAATINEN_HEMATOPOIETIC_STEM_CELL_DN           | 23  | 223 | 16030 | 524  | 3.199081 | 9.30E-07 |
| turquoise  | 3711  | MODULE_239                                    | 55  | 119 | 16134 | 4169 | 1.801845 | 9.36E-07 |
| greenyello | 8450  | GSE11057_EFF_MEM_VS_CENT_MEM_CD4_TCELL_UP     | 11  | 181 | 16072 | 150  | 6.585009 | 9.39E-07 |
| purple     | 3498  | MODULE_5                                      | 16  | 383 | 15870 | 157  | 4.324691 | 9.50E-07 |
| red        | 8455  | GSE11057_CD4_CENT_MEM_VS_PBMCDN               | 21  | 191 | 16062 | 524  | 3.410265 | 9.76E-07 |
| lightcyan  | 5966  | ZHANG_RESPONSE_TO_IKK_INHIBITOR_AND_TNF_UP    | 8   | 203 | 16050 | 62   | 10.33084 | 9.79E-07 |
| turquoise  | 2141  | TTTTGAG,MIR-373                               | 83  | 202 | 16051 | 4169 | 1.601874 | 1.04E-06 |
| greenyello | 8829  | GSE17580_UNINFECTED_VS_S_MANSONI_INF_TEFF_DI  | 11  | 183 | 16070 | 150  | 6.513042 | 1.05E-06 |
| purple     | 4824  | LIU_PROSTATE_CANCER_DN                        | 16  | 386 | 15867 | 157  | 4.29108  | 1.05E-06 |
| cyan       | 5530  | BOWIE_RESPONSE_TO_EXTRACELLULAR_MATRIX        | 4   | 17  | 16236 | 77   | 49.66539 | 1.06E-06 |
| magenta    | 9336  | GSE22886_NAIVE_BCELL_VS_BM_PLASMA_CELL_UP     | 12  | 200 | 16053 | 167  | 5.839401 | 1.07E-06 |
| turquoise  | 4943  | BORCZUK_MALIGNANT_MESOTHELIOMA_UP             | 115 | 302 | 15951 | 4169 | 1.484542 | 1.09E-06 |
| brown      | 9357  | GSE22886_DC_VS_MONOCYTE_DN                    | 52  | 198 | 16055 | 2190 | 1.949071 | 1.10E-06 |
| brown      | 9365  | GSE22886_NAIVE_BCELL_VS_NEUTROPHIL_DN         | 52  | 198 | 16055 | 2190 | 1.949071 | 1.10E-06 |
| brown      | 2850  | KEGG_LEUKOCYTE_TRANSENDOTHELIAL_MIGRATION     | 32  | 99  | 16154 | 2190 | 2.398856 | 1.10E-06 |
| turquoise  | 5911  | BENPORATH_CYCLING_GENES                       | 212 | 622 | 15631 | 4169 | 1.328762 | 1.13E-06 |
| brown      | 2833  | KEGG_ADHERENS_JUNCTION                        | 25  | 68  | 16185 | 2190 | 2.728478 | 1.14E-06 |
| turquoise  | 5915  | STARK_PREFRONTAL_CORTEX_22Q11_DELETION_DN     | 175 | 498 | 15755 | 4169 | 1.369968 | 1.16E-06 |
| lightcyan  | 6686  | ZHU_CMV_24_HR_UP                              | 6   | 90  | 16163 | 62   | 17.47634 | 1.17E-06 |
| turquoise  | 4957  | BASAKI_YBX1_TARGETS_DN                        | 132 | 357 | 15896 | 4169 | 1.441476 | 1.19E-06 |
| turquoise  | 3305  | chr8q21                                       | 24  | 38  | 16215 | 4169 | 2.462234 | 1.20E-06 |
| turquoise  | 6796  | KRIGE_RESPONSE_TO_TOSEDOSTAT_24HR_UP          | 252 | 759 | 15494 | 4169 | 1.294376 | 1.21E-06 |
| magenta    | 5969  | MORI_PRE_BI_LYMPHOCYTE_DN                     | 8   | 77  | 16176 | 167  | 10.11152 | 1.21E-06 |
| blue       | 3524  | MODULE_35                                     | 12  | 16  | 16237 | 2978 | 4.093267 | 1.22E-06 |
| lightcyan  | 3533  | MODULE_44                                     | 9   | 285 | 15968 | 62   | 8.278268 | 1.24E-06 |
| turquoise  | 6962  | FINETTI_BREAST_CANCERS_KINOME_GRAY            | 13  | 15  | 16238 | 4169 | 3.378732 | 1.25E-06 |
| red        | 9986  | GSE3982_EOSINOPHIL_VS_NKCELL_UP               | 20  | 178 | 16075 | 524  | 3.485076 | 1.25E-06 |
| red        | 9938  | GSE37416_0H_VS_12H_F_TULARENSIS_LVS_NEUTROPHI | 21  | 194 | 16059 | 524  | 3.357529 | 1.26E-06 |
| turquoise  | 6794  | KRIGE_RESPONSE_TO_TOSEDOSTAT_6HR_UP           | 301 | 929 | 15324 | 4169 | 1.263143 | 1.27E-06 |
| blue       | 2444  | MORF_PRKAG1                                   | 69  | 218 | 16035 | 2978 | 1.727434 | 1.29E-06 |
| red        | 6416  | IVANOVA_HEMATOPOIESIS_MATURE_CELL             | 26  | 279 | 15974 | 524  | 2.890489 | 1.29E-06 |
| brown      | 9665  | GSE29618_PDC_VS_MDC_DN                        | 52  | 199 | 16054 | 2190 | 1.939276 | 1.30E-06 |
| brown      | 10272 | GSE9988_ANTI_TREM1_VS_ANTI_TREM1_AND_LPS_M    | 52  | 199 | 16054 | 2190 | 1.939276 | 1.30E-06 |
| lightcyan  | 1820  | V\$ICSBP_Q6                                   | 8   | 211 | 16042 | 62   | 9.939153 | 1.31E-06 |
| purple     | 6032  | ONDER_CDH1_TARGETS_2_UP                       | 12  | 217 | 16036 | 157  | 5.724735 | 1.32E-06 |
| brown      | 7482  | VALK_AML_CLUSTER_5                            | 16  | 33  | 16220 | 2190 | 3.598284 | 1.34E-06 |
| turquoise  | 2075  | CATGTAA,MIR-496                               | 67  | 155 | 16098 | 4169 | 1.685174 | 1.35E-06 |
| turquoise  | 7531  | CHIANG_LIVER_CANCER_SUBCLASS_UNANNOTATED_D    | 78  | 188 | 16065 | 4169 | 1.617478 | 1.38E-06 |
| lightcyan  | 9221  | GSE18791_CTRL_VS_NEWCASTLE_VIRUS_DC_2H_DN     | 7   | 147 | 16106 | 62   | 12.4831  | 1.39E-06 |
| blue       | 8422  | GSE10325_CD4_TCELL_VS_BCELL_UP                | 63  | 194 | 16059 | 2978 | 1.772343 | 1.39E-06 |
| turquoise  | 6994  | DE_YY1_TARGETS_DN                             | 42  | 84  | 16169 | 4169 | 1.949268 | 1.40E-06 |
| lightcyan  | 6229  | LEE_LIVER_CANCER_E2F1_UP                      | 5   | 51  | 16202 | 62   | 25.70051 | 1.41E-06 |
| cyan       | 9828  | GSE360_DC_VS_MAC_M_TUBERCULOSIS_UP            | 8   | 171 | 16082 | 77   | 9.874991 | 1.45E-06 |
| cyan       | 10136 | GSE6269_FLU_VS_STREP_AUREUS_INF_PBMCDN        | 8   | 171 | 16082 | 77   | 9.874991 | 1.45E-06 |
| magenta    | 10128 | GSE6269_HEALTHY_VS_E_COLI_INF_PBMCDN          | 11  | 170 | 16083 | 167  | 6.297393 | 1.46E-06 |
| salmon     | 7556  | YAGI_AML_WITH_INV_16_TRANSLOCATION            | 14  | 377 | 15876 | 127  | 4.752438 | 1.48E-06 |
| red        | 8449  | GSE11057_NAIVE_CD4_VS_PBMCDN                  | 21  | 196 | 16057 | 524  | 3.323269 | 1.49E-06 |
| turquoise  | 183   | MACROMOLECULAR_COMPLEX                        | 283 | 868 | 15385 | 4169 | 1.271067 | 1.50E-06 |
| yellow     | 5732  | SPIELMAN_LYMPHOBLAST_EUROPEAN_VS_ASIAN_UP     | 73  | 475 | 15778 | 1426 | 1.751634 | 1.50E-06 |
| turquoise  | 4857  | GAZDA_DIAMOND_BLACKFAN_ANEMIA_PROGENITOR      | 34  | 63  | 16190 | 4169 | 2.103972 | 1.50E-06 |
| red        | 7316  | MARTINELLI_IMMATURE_NEUTROPHIL_DN             | 6   | 13  | 16240 | 524  | 14.31562 | 1.54E-06 |
| magenta    | 5093  | SABATES_COLORECTAL_ADENOMA_DN                 | 11  | 171 | 16082 | 167  | 6.260567 | 1.55E-06 |
| pink       | 7914  | WIERENGA_STAT5A_TARGETS_GROUP1                | 11  | 126 | 16127 | 228  | 6.223301 | 1.61E-06 |
| turquoise  | 7400  | SHEDDEN_LUNG_CANCER_POOR_SURVIVAL_A6          | 155 | 434 | 15819 | 4169 | 1.392335 | 1.62E-06 |
| salmon     | 9983  | GSE3982_EOSINOPHIL_VS_EFF_MEMORY_CD4_TCELL    | 10  | 182 | 16071 | 127  | 7.031669 | 1.63E-06 |
| blue       | 2375  | MORF_DDB1                                     | 74  | 240 | 16013 | 2978 | 1.682788 | 1.64E-06 |
| green      | 8591  | GSE13485_DAY3_VS_DAY21_YF17D_VACCINE_PBMCDN   | 21  | 83  | 16170 | 1305 | 3.151115 | 1.65E-06 |

|            |                                                     |     |      |       |      |          |          |
|------------|-----------------------------------------------------|-----|------|-------|------|----------|----------|
| lightgreen | 8008 WINZEN_DEGRADED_VIA_KHSRP                      | 5   | 78   | 16175 | 42   | 24.80617 | 1.66E-06 |
| salmon     | 6159 POMEROY_MEDULLOBLASTOMA_DESMOPLASIC_VS_CI      | 6   | 47   | 16206 | 127  | 16.33741 | 1.67E-06 |
| salmon     | 7468 IRITANI_MAD1_TARGETS_DN                        | 6   | 47   | 16206 | 127  | 16.33741 | 1.67E-06 |
| salmon     | 6677 WHITESIDE_CISPLATIN_RESISTANCE_DN              | 4   | 12   | 16241 | 127  | 42.65879 | 1.68E-06 |
| lightcyan  | 2841 KEGG_RIG_I_LIKE_RECEPTOR_SIGNALING_PATHWAY     | 5   | 53   | 16200 | 62   | 24.73068 | 1.71E-06 |
| blue       | 5744 PUJANA_ATM_PCC_NETWORK                         | 306 | 1317 | 14936 | 2978 | 1.268074 | 1.72E-06 |
| blue       | 2371 MORF_CUL1                                      | 30  | 70   | 16183 | 2978 | 2.33901  | 1.72E-06 |
| turquoise  | 10110 GSE39820_CTRL_VS_TGFBETA3_IL6_IL23A_CD4_TCELL | 80  | 195  | 16058 | 4169 | 1.5994   | 1.73E-06 |
| blue       | 7499 JISON_SICKLE_CELL_DISEASE_DN                   | 58  | 175  | 16078 | 2978 | 1.808834 | 1.73E-06 |
| cyan       | 6760 ZHU_CMV_8_HR_UP                                | 5   | 43   | 16210 | 77   | 24.54394 | 1.75E-06 |
| turquoise  | 5245 GAUSSMANN_MLL_AF4_FUSION_TARGETS_C_UP          | 66  | 153  | 16100 | 4169 | 1.681722 | 1.76E-06 |
| cyan       | 3853 MODULE_436                                     | 7   | 122  | 16131 | 77   | 12.11103 | 1.76E-06 |
| red        | 8774 GSE15767_MED_VS_SCS_MAC_LN_UP                  | 20  | 182  | 16071 | 524  | 3.408481 | 1.78E-06 |
| turquoise  | 1966 ACTGAAA,MIR-30A-3P,MIR-30E-3P                  | 74  | 177  | 16076 | 4169 | 1.629897 | 1.81E-06 |
| brown      | 6403 REN_ALVEOLAR_RHABDOMYOSARCOMA_DN               | 85  | 384  | 15869 | 2190 | 1.642771 | 1.82E-06 |
| greenyello | 7588 ONO_AML1_TARGETS_UP                            | 5   | 23   | 16230 | 150  | 23.55507 | 1.84E-06 |
| greenyello | 9315 GSE22886_NAIVE_TCELL_VS_NKCELL_DN              | 11  | 194  | 16059 | 150  | 6.143746 | 1.86E-06 |
| cyan       | 7307 ICHIBA_GRAFT_VERSUS_HOST_DISEASE_35D_UP        | 7   | 123  | 16130 | 77   | 12.01256 | 1.86E-06 |
| brown      | 8592 GSE13485_DAY7_VS_DAY21_YF17D_VACCINE_PBMCL     | 51  | 196  | 16057 | 2190 | 1.931094 | 1.87E-06 |
| lightcyan  | 9711 GSE30083_SP1_VS_SP2_THYMOCYTE_DN               | 7   | 154  | 16099 | 62   | 11.91569 | 1.90E-06 |
| lightcyan  | 7305 ICHIBA_GRAFT_VERSUS_HOST_DISEASE_D7_UP         | 6   | 98   | 16155 | 62   | 16.0497  | 1.93E-06 |
| red        | 3563 MODULE_75                                      | 29  | 340  | 15913 | 524  | 2.645583 | 1.95E-06 |
| brown      | 4976 SMIRNOV_CIRCULATING_ENDOTHELIOCYTES_IN_CANC    | 43  | 155  | 16098 | 2190 | 2.058857 | 1.95E-06 |
| cyan       | 9148 GSE17721_12H_VS_24H_GARDIQUIMOD_BMDM_UP        | 8   | 178  | 16075 | 77   | 9.486648 | 1.95E-06 |
| magenta    | 4944 BORCZUK_MALIGNANT_MESOTHELIOMA_DN              | 8   | 82   | 16171 | 167  | 9.494961 | 1.96E-06 |
| turquoise  | 4808 PICCALUGA_ANGIOIMMUNOBLASTIC_LYMPHOMA_DN       | 59  | 133  | 16120 | 4169 | 1.729426 | 2.05E-06 |
| pink       | 10137 GSE6269_FLU_VS_STREP_AUREUS_INF_PBMCL_DN      | 12  | 156  | 16097 | 228  | 5.483468 | 2.07E-06 |
| brown      | 2577 GNF2_CARD15                                    | 25  | 70   | 16183 | 2190 | 2.650522 | 2.12E-06 |
| salmon     | 7531 CHIANG_LIVER_CANCER_SUBCLASS_UNANNOTATED_D     | 10  | 188  | 16065 | 127  | 6.807254 | 2.19E-06 |
| turquoise  | 9936 GSE37416_0H_VS_6H_F_TULARENSIS_LVS_NEUTROPH    | 80  | 196  | 16057 | 4169 | 1.59124  | 2.20E-06 |
| cyan       | 9803 GSE360_CTRL_VS_M_TUBERCULOSIS_DC_DN            | 8   | 181  | 16072 | 77   | 9.329411 | 2.21E-06 |
| cyan       | 9857 GSE360_HIGH_DOSE_B_MALAYI_VS_M_TUBERCULOSIS    | 8   | 181  | 16072 | 77   | 9.329411 | 2.21E-06 |
| red        | 7912 WIERENGA_STAT5A_TARGETS_UP                     | 21  | 201  | 16052 | 524  | 3.2406   | 2.24E-06 |
| turquoise  | 3232 chr5q14                                        | 21  | 32   | 16221 | 4169 | 2.558415 | 2.26E-06 |
| brown      | 10046 GSE3982_NEUTROPHIL_VS_BCELL_UP                | 45  | 166  | 16087 | 2190 | 2.011842 | 2.27E-06 |
| salmon     | 9981 GSE3982_EOSINOPHIL_VS_BASOPHIL_DN              | 10  | 189  | 16064 | 127  | 6.771237 | 2.30E-06 |
| purple     | 4530 REACTOME_SMOOTH_MUSCLE_CONTRACTION             | 5   | 23   | 16230 | 157  | 22.50485 | 2.31E-06 |
| turquoise  | 2020 ATACTGT,MIR-144                                | 74  | 178  | 16075 | 4169 | 1.62074  | 2.33E-06 |
| purple     | 931 RESPONSE_TO_WOUNDING                            | 10  | 153  | 16100 | 157  | 6.766163 | 2.33E-06 |
| pink       | 6274 GUO_HEX_TARGETS_DN                             | 8   | 62   | 16191 | 228  | 9.198076 | 2.34E-06 |
| turquoise  | 2023 GTATTAT,MIR-369-3P                             | 69  | 163  | 16090 | 4169 | 1.650301 | 2.35E-06 |
| purple     | 10239 GSE9006_TYPE_1_VS_TYPE_2_DIABETES_PBMCL_AT_D  | 11  | 190  | 16063 | 157  | 5.993396 | 2.37E-06 |
| blue       | 2537 GCM_NF2                                        | 86  | 293  | 15960 | 2978 | 1.601916 | 2.39E-06 |
| salmon     | 8410 GSE10239_NAIVE_VS_KLRG1HIGH_EFF_CD8_TCELL_UP   | 10  | 190  | 16063 | 127  | 6.735599 | 2.41E-06 |
| brown      | 4890 FULCHER_INFLAMMATORY_RESPONSE_LLECTIN_VS_LPS   | 114 | 558  | 15695 | 2190 | 1.516213 | 2.41E-06 |
| red        | 6358 TAVOR_CEBPA_TARGETS_UP                         | 10  | 48   | 16205 | 524  | 6.461912 | 2.42E-06 |
| salmon     | 71 NON_MEMBRANE_BOUND_ORGANELLE                     | 17  | 575  | 15678 | 127  | 3.783649 | 2.42E-06 |
| salmon     | 177 INTRACELLULAR_NON_MEMBRANE_BOUND_ORGANEL        | 17  | 575  | 15678 | 127  | 3.783649 | 2.42E-06 |
| blue       | 8688 GSE1460_INTRATHYMIC_T_PROGENITOR_VS_NAIVE_CI   | 63  | 197  | 16056 | 2978 | 1.745353 | 2.49E-06 |
| greenyello | 5907 BENPORATH_ES_WITH_H3K27ME3                     | 20  | 654  | 15599 | 150  | 3.313558 | 2.49E-06 |
| red        | 10269 GSE9988_ANTI_TREM1_VS_LPS_MONOCYTE_DN         | 20  | 186  | 16067 | 524  | 3.33518  | 2.50E-06 |
| greenyello | 6268 MATSUDA_NATURAL_KILLER_DIFFERENTIATION         | 16  | 433  | 15820 | 150  | 4.003818 | 2.55E-06 |
| blue       | 6286 LI_WILMS_TUMOR_VS_FETAL_KIDNEY_1_DN            | 53  | 157  | 16096 | 2978 | 1.842405 | 2.57E-06 |
| red        | 5966 ZHANG_RESPONSE_TO_IKK_INHIBITOR_AND_TNF_UP     | 21  | 203  | 16050 | 524  | 3.208673 | 2.63E-06 |
| turquoise  | 7937 BRUINS_UVC_RESPONSE_LATE                       | 332 | 1045 | 15208 | 4169 | 1.238578 | 2.65E-06 |
| brown      | 2816 KEGG_LYSOSOME                                  | 35  | 117  | 16136 | 2190 | 2.220095 | 2.69E-06 |
| brown      | 9940 GSE37416_0H_VS_24H_F_TULARENSIS_LVS_NEUTROPH   | 50  | 193  | 16060 | 2190 | 1.922658 | 2.69E-06 |
| cyan       | 8805 GSE15930_STIM_VS_STIM_AND_IFNAB_48H_CD8_T_C    | 8   | 186  | 16067 | 77   | 9.07862  | 2.71E-06 |
| red        | 6316 VERHAAK_AML_WITH_NPM1_MUTATED_UP               | 19  | 171  | 16082 | 524  | 3.446353 | 2.73E-06 |
| red        | 6403 REN_ALVEOLAR_RHABDOMYOSARCOMA_DN               | 31  | 384  | 15869 | 524  | 2.503991 | 2.75E-06 |



|            |       |                                                 |     |      |       |      |          |          |
|------------|-------|-------------------------------------------------|-----|------|-------|------|----------|----------|
| brown      | 4021  | PID_AJDISS_2PATHWAY                             | 18  | 42   | 16211 | 2190 | 3.180626 | 2.80E-06 |
| cyan       | 9953  | GSE3982_CTRL_VS_LPS_4H_MAC_DN                   | 8   | 187  | 16066 | 77   | 9.030072 | 2.82E-06 |
| salmon     | 8408  | GSE10239_NAIVE_VS_KLRG1INT_EFF_CD8_TCELL_UP     | 10  | 194  | 16059 | 127  | 6.596721 | 2.90E-06 |
| salmon     | 10047 | GSE3982_NEUTROPHIL_VS_BCELL_DN                  | 10  | 194  | 16059 | 127  | 6.596721 | 2.90E-06 |
| red        | 10273 | GSE9988_ANTI_TREM1_VS_ANTI_TREM1_AND_LPS_M      | 19  | 172  | 16081 | 524  | 3.426316 | 2.98E-06 |
| brown      | 9346  | GSE22886_DAY0_VS_DAY1_MONOCYTE_IN_CULTURE_      | 51  | 199  | 16054 | 2190 | 1.901983 | 3.02E-06 |
| brown      | 8442  | GSE10856_CTRL_VS_TNFRSF6B_IN_MACROPHAGE_UP      | 47  | 178  | 16075 | 2190 | 1.959599 | 3.02E-06 |
| purple     | 826   | RESPONSE_TO_EXTERNAL_STIMULUS                   | 12  | 235  | 16018 | 157  | 5.286245 | 3.03E-06 |
| cyan       | 9461  | GSE24634_IL4_VS_CTRL_TREATED_NAIVE_CD4_TCELL_   | 8   | 189  | 16064 | 77   | 8.934515 | 3.06E-06 |
| turquoise  | 6031  | DING_LUNG_CANCER_EXPRESSION_BY_COPY_NUMBEF      | 47  | 100  | 16153 | 4169 | 1.832312 | 3.18E-06 |
| blue       | 10128 | GSE6269_HEALTHY_VS_E_COLI_INF_PBMC_UP           | 56  | 170  | 16083 | 2978 | 1.797827 | 3.21E-06 |
| black      | 5307  | HAMAI_APOPTOSIS_VIA_TRAIL_DN                    | 13  | 155  | 16098 | 283  | 4.816802 | 3.23E-06 |
| pink       | 5120  | GRAHAM_CML_QUIESCENT_VS_NORMAL_QUIESCENT_       | 9   | 86   | 16167 | 228  | 7.460067 | 3.24E-06 |
| turquoise  | 679   | CELLULAR_PROTEIN_METABOLIC_PROCESS              | 320 | 1005 | 15248 | 4169 | 1.241325 | 3.28E-06 |
| brown      | 9319  | GSE22886_NAIVE_CD8_TCELL_VS_NKCELL_DN           | 49  | 189  | 16064 | 2190 | 1.924083 | 3.30E-06 |
| red        | 5599  | DACOSTA_UV_RESPONSE_VIA_ERCC3_DN                | 52  | 829  | 15424 | 524  | 1.945589 | 3.31E-06 |
| purple     | 2831  | KEGG_ECM_RECEPTOR_INTERACTION                   | 7   | 66   | 16187 | 157  | 10.97964 | 3.31E-06 |
| turquoise  | 779   | PROTEIN_METABOLIC_PROCESS                       | 350 | 1111 | 15142 | 4169 | 1.228162 | 3.34E-06 |
| salmon     | 3848  | MODULE_429                                      | 4   | 14   | 16239 | 127  | 36.56468 | 3.35E-06 |
| purple     | 3541  | MODULE_52                                       | 15  | 373  | 15880 | 157  | 4.163095 | 3.37E-06 |
| lightgreen | 345   | SIGNAL_TRANSDUCTION                             | 14  | 1331 | 14922 | 42   | 4.070373 | 3.38E-06 |
| salmon     | 6439  | ZHOU_TNF_SIGNALING_4HR                          | 6   | 53   | 16200 | 127  | 14.48789 | 3.44E-06 |
| cyan       | 6285  | NEMETH_INFLAMMATORY_RESPONSE_LPS_UP             | 6   | 87   | 16166 | 77   | 14.5571  | 3.46E-06 |
| red        | 2710  | GNF2_TNFSF10                                    | 8   | 30   | 16223 | 524  | 8.271247 | 3.46E-06 |
| salmon     | 8392  | KAECH_DAY8_EFF_VS_DAY15_EFF_CD8_TCELL_UP        | 10  | 198  | 16055 | 127  | 6.463453 | 3.49E-06 |
| lightcyan  | 8366  | KRAS.600_UP.V1_DN                               | 7   | 169  | 16084 | 62   | 10.85808 | 3.53E-06 |
| cyan       | 3477  | ST_TYPE_I_INTERFERON_PATHWAY                    | 3   | 7    | 16246 | 77   | 90.46197 | 3.53E-06 |
| brown      | 9379  | GSE22886_NAIVE_CD4_TCELL_VS_DC_DN               | 51  | 200  | 16053 | 2190 | 1.892473 | 3.53E-06 |
| purple     | 6347  | DORSEY_GAB2_TARGETS                             | 5   | 25   | 16228 | 157  | 20.70446 | 3.59E-06 |
| greenyello | 10082 | GSE3982_EFF_MEMORY_VS_CENT_MEMORY_CD4_TCE       | 10  | 168  | 16085 | 150  | 6.449603 | 3.59E-06 |
| red        | 136   | INTEGRAL_TO_PLASMA_MEMBRANE                     | 47  | 721  | 15532 | 524  | 2.021924 | 3.63E-06 |
| lightcyan  | 8159  | ACEVEDO_FGFR1_TARGETS_IN_PROSTATE_CANCER_M      | 8   | 242  | 16011 | 62   | 8.665956 | 3.64E-06 |
| salmon     | 9355  | GSE22886_NEUTROPHIL_VS_MONOCYTE_DN              | 10  | 199  | 16054 | 127  | 6.430974 | 3.65E-06 |
| turquoise  | 6863  | MARSON_BOUND_BY_FOXP3_STIMULATED                | 312 | 978  | 15275 | 4169 | 1.243705 | 3.65E-06 |
| purple     | 6174  | ROSS_AML_OF_FAB_M7_TYPE                         | 7   | 67   | 16186 | 157  | 10.81576 | 3.67E-06 |
| blue       | 7397  | LEE_DIFFERENTIATING_T_LYMPHOCYTE                | 62  | 195  | 16058 | 2978 | 1.735265 | 3.69E-06 |
| turquoise  | 10116 | GSE39820_TGFBETA3_IL6_VS_TGFBETA3_IL6_IL23A_TF  | 76  | 186  | 16067 | 4169 | 1.592951 | 3.72E-06 |
| lightcyan  | 6735  | SATO_SILENCED_BY_METHYLATION_IN_PANCREATIC_C    | 9   | 326  | 15927 | 62   | 7.237136 | 3.75E-06 |
| cyan       | 5569  | DAUER_STAT3_TARGETS_DN                          | 5   | 50   | 16203 | 77   | 21.10779 | 3.75E-06 |
| lightcyan  | 9828  | GSE360_DC_VS_MAC_M_TUBERCULOSIS_UP              | 7   | 171  | 16082 | 62   | 10.73109 | 3.81E-06 |
| brown      | 10058 | GSE3982_NEUTROPHIL_VS_TH2_UP                    | 45  | 169  | 16084 | 2190 | 1.976129 | 3.82E-06 |
| turquoise  | 4969  | WANG_CLIM2_TARGETS_DN                           | 73  | 177  | 16076 | 4169 | 1.607871 | 3.84E-06 |
| red        | 9997  | GSE3982_MAST_CELL_VS_NEUTROPHIL_DN              | 19  | 175  | 16078 | 524  | 3.367579 | 3.85E-06 |
| brown      | 5854  | RICKMAN_METASTASIS_DN                           | 59  | 244  | 16009 | 2190 | 1.794534 | 3.99E-06 |
| yellow     | 2244  | SCGGAAGY_V\$ELK1_02                             | 146 | 1162 | 15091 | 1426 | 1.432058 | 4.06E-06 |
| red        | 8458  | GSE11057_PBMC_VS_MEM_CD4_TCELL_UP               | 20  | 192  | 16061 | 524  | 3.230956 | 4.08E-06 |
| turquoise  | 2249  | MGGAAGTG_V\$GABP_B                              | 239 | 725  | 15528 | 4169 | 1.285173 | 4.10E-06 |
| yellow     | 186   | MITOCHONDRION                                   | 54  | 327  | 15926 | 1426 | 1.882175 | 4.16E-06 |
| greenyello | 4368  | REACTOME_CLASS_A1_RHODOPSIN_LIKE_RECEPTORS      | 10  | 171  | 16082 | 150  | 6.336452 | 4.21E-06 |
| lightcyan  | 6804  | KIM_LRRC3B_TARGETS                              | 4   | 29   | 16224 | 62   | 36.15795 | 4.24E-06 |
| brown      | 2685  | GNF2_PTPN6                                      | 19  | 47   | 16206 | 2190 | 3.000165 | 4.27E-06 |
| lightgreen | 10082 | GSE3982_EFF_MEMORY_VS_CENT_MEMORY_CD4_TCE       | 6   | 168  | 16085 | 42   | 13.82058 | 4.30E-06 |
| turquoise  | 1942  | AGCACTT,MIR-93,MIR-302A,MIR-302B,MIR-302C,MIR-3 | 113 | 303  | 15950 | 4169 | 1.45391  | 4.30E-06 |
| cyan       | 8474  | GSE11864_CSF1_IFNG_VS_CSF1_PAM3CYS_IN_MAC_U     | 8   | 198  | 16055 | 77   | 8.528401 | 4.32E-06 |
| red        | 8576  | GSE13485_CTRL_VS_DAY3_YF17D_VACCINE_PBMC_UP     | 17  | 145  | 16108 | 524  | 3.636496 | 4.39E-06 |
| brown      | 6287  | HESS_TARGETS_OF_HOXA9_AND_MEIS1_DN              | 26  | 77   | 16176 | 2190 | 2.505948 | 4.44E-06 |
| turquoise  | 9683  | GSE29618_PRE_VS_DAY7_FLU_VACCINE_PDC_DN         | 79  | 196  | 16057 | 4169 | 1.571349 | 4.48E-06 |
| cyan       | 8437  | GSE10325_BCELL_VS_LUPUS_BCELL_DN                | 8   | 199  | 16054 | 77   | 8.485545 | 4.48E-06 |
| blue       | 5745  | PUJANA_CHEK2_PCC_NETWORK                        | 187 | 757  | 15496 | 2978 | 1.348201 | 4.51E-06 |
| blue       | 9403  | GSE24026_PD1_LIGATION_VS_CTRL_IN_ACT_TCELL_LIN  | 61  | 192  | 16061 | 2978 | 1.733954 | 4.53E-06 |

|             |       |                                              |     |      |       |      |          |          |
|-------------|-------|----------------------------------------------|-----|------|-------|------|----------|----------|
| red         | 10061 | GSE3982_BCELL_VS_BASOPHIL_DN                 | 19  | 177  | 16076 | 524  | 3.329527 | 4.56E-06 |
| salmon      | 5031  | RHEIN_ALL_GLUCOCORTICOID_THERAPY_DN          | 13  | 358  | 15895 | 127  | 4.647187 | 4.58E-06 |
| lightcyan   | 9834  | GSE360_L_DONOVANI_VS_B_MALAYI_HIGH_DOSE_DC   | 7   | 176  | 16077 | 62   | 10.42623 | 4.61E-06 |
| cyan        | 6968  | WALLACE_PROSTATE_CANCER_RACE_UP              | 9   | 267  | 15986 | 77   | 7.114986 | 4.63E-06 |
| blue        | 9992  | GSE3982_MAST_CELL_VS_DC_UP                   | 59  | 184  | 16069 | 2978 | 1.75002  | 4.66E-06 |
| turquoise   | 9003  | GSE17721_POLYIC_VS_CPG_0.5H_BMDM_DN          | 76  | 187  | 16066 | 4169 | 1.584432 | 4.70E-06 |
| brown       | 8622  | GSE14000_4H_VS_16H_LPS_DC_TRANSLATED_RNA_UF  | 48  | 186  | 16067 | 2190 | 1.915216 | 4.75E-06 |
| blue        | 8712  | GSE1460_NAIVE_CD4_TCELL_ADULT_BLOOD_VS_THYM  | 57  | 176  | 16077 | 2978 | 1.767547 | 4.77E-06 |
| turquoise   | 1969  | TACTTGA,MIR-26A,MIR-26B                      | 105 | 278  | 15975 | 4169 | 1.472469 | 4.84E-06 |
| salmon      | 2690  | GNF2_RAN                                     | 7   | 86   | 16167 | 127  | 10.41668 | 4.85E-06 |
| lightgreen  | 2653  | GNF2_IL2RB                                   | 4   | 44   | 16209 | 42   | 35.17965 | 4.85E-06 |
| lightcyan   | 4657  | REACTOME_NEGATIVE_REGULATORS_OF_RIG_I_MDA5   | 4   | 30   | 16223 | 62   | 34.95269 | 4.88E-06 |
| purple      | 2835  | KEGG_GAP_JUNCTION                            | 7   | 70   | 16183 | 157  | 10.35223 | 4.94E-06 |
| red         | 10231 | GSE9006_HEALTHY_VS_TYPE_2_DIABETES_PBMC_AT_I | 19  | 178  | 16075 | 524  | 3.310822 | 4.95E-06 |
| greenyello  | 1012  | CELLULAR_DEFENSE_RESPONSE                    | 6   | 48   | 16205 | 150  | 13.54417 | 4.98E-06 |
| blue        | 3645  | MODULE_160                                   | 11  | 15   | 16238 | 2978 | 4.002306 | 5.06E-06 |
| turquoise   | 2124  | ACCATTT,MIR-522                              | 62  | 145  | 16108 | 4169 | 1.666961 | 5.06E-06 |
| brown       | 9443  | GSE24634_TREG_VS_TCONV_POST_DAY5_IL4_CONVER  | 50  | 197  | 16056 | 2190 | 1.88362  | 5.06E-06 |
| greenyello  | 356   | CELL_SURFACE_RECEPTOR_LINKED_SIGNAL_TRANSDUC | 16  | 457  | 15796 | 150  | 3.793552 | 5.08E-06 |
| lightyellow | 5047  | TONKS_TARGETS_OF_RUNX1_RUNX1T1_FUSION_GRAN   | 3   | 17   | 16236 | 33   | 86.91444 | 5.09E-06 |
| red         | 2620  | GNF2_CD33                                    | 10  | 52   | 16201 | 524  | 5.964841 | 5.21E-06 |
| turquoise   | 935   | CELLULAR_MACROMOLECULE_METABOLIC_PROCESS     | 322 | 1017 | 15236 | 4169 | 1.234345 | 5.24E-06 |
| lightcyan   | 5141  | DODD_NASOPHARYNGEAL_CARCINOMA_DN             | 17  | 1311 | 14942 | 62   | 3.399289 | 5.24E-06 |
| red         | 6314  | THEILGAARD_NEUTROPHIL_AT_SKIN_WOUND_UP       | 12  | 76   | 16177 | 524  | 4.897449 | 5.27E-06 |
| black       | 7719  | MIKKELSEN_NPC_HCP_WITH_H3K27ME3              | 13  | 162  | 16091 | 283  | 4.608668 | 5.27E-06 |
| blue        | 9786  | GSE34205_HEALTHY_VS_RSV_INF_INFANT_PBMC_UP   | 61  | 193  | 16060 | 2978 | 1.724969 | 5.45E-06 |
| salmon      | 5797  | LOPEZ_MBD_TARGETS                            | 21  | 893  | 15360 | 127  | 3.009523 | 5.48E-06 |
| magenta     | 6310  | ZHAN_MULTIPLE_MYELOMA_CD2_UP                 | 6   | 44   | 16209 | 167  | 13.27137 | 5.49E-06 |
| magenta     | 8561  | GSE13411_PLASMA_CELL_VS_MEMORY_BCELL_DN      | 11  | 195  | 16058 | 167  | 5.490035 | 5.54E-06 |
| lightcyan   | 8569  | GSE13484_12H_UNSTIM_VS_YF17D_VACCINE_STIM_PI | 7   | 181  | 16072 | 62   | 10.13821 | 5.55E-06 |
| lightcyan   | 8909  | GSE17721_CTRL_VS_GARDIQUIMOD_12H_BMDM_DN     | 7   | 181  | 16072 | 62   | 10.13821 | 5.55E-06 |
| lightcyan   | 9203  | GSE17974_IL4_AND_ANTI_IL12_VS_UNTREATED_72H_ | 7   | 181  | 16072 | 62   | 10.13821 | 5.55E-06 |
| lightcyan   | 9803  | GSE360_CTRL_VS_M_TUBERCULOSIS_DC_DN          | 7   | 181  | 16072 | 62   | 10.13821 | 5.55E-06 |
| red         | 9936  | GSE37416_0H_VS_6H_F_TULARENSIS_LVS_NEUTROPH  | 20  | 196  | 16057 | 524  | 3.165018 | 5.59E-06 |
| red         | 10038 | GSE3982_MAC_VS_CENT_MEMORY_CD4_TCELL_UP      | 20  | 196  | 16057 | 524  | 3.165018 | 5.59E-06 |
| cyan        | 3534  | MODULE_45                                    | 12  | 520  | 15733 | 77   | 4.871029 | 5.61E-06 |
| red         | 14    | INTRINSIC_TO_PLASMA_MEMBRANE                 | 47  | 733  | 15520 | 524  | 1.988823 | 5.64E-06 |
| brown       | 2716  | GNF2_VAV1                                    | 16  | 36   | 16217 | 2190 | 3.298427 | 5.64E-06 |
| turquoise   | 42    | CYTOPLASMIC_PART                             | 395 | 1277 | 14976 | 4169 | 1.20589  | 5.64E-06 |
| turquoise   | 8583  | GSE13485_DAY1_VS_DAY3_YF17D_VACCINE_PBMC_DI  | 78  | 194  | 16059 | 4169 | 1.567453 | 5.73E-06 |
| lightcyan   | 10247 | GSE9037_CTRL_VS_LPS_4H_STIM_IRAK4_KO_BMDM_I  | 7   | 182  | 16071 | 62   | 10.08251 | 5.75E-06 |
| red         | 10288 | GSE9988_LOW_LPS_VS_CTRL_TREATED_MONOCYTE_U   | 19  | 180  | 16073 | 524  | 3.274035 | 5.84E-06 |
| black       | 7559  | MEISSNER_NPC_HCP_WITH_H3K4ME2_AND_H3K27ME    | 14  | 189  | 16064 | 283  | 4.254155 | 5.84E-06 |
| brown       | 9367  | GSE22886_NAIVE_BCELL_VS_DC_DN                | 50  | 198  | 16055 | 2190 | 1.874106 | 5.90E-06 |
| lightcyan   | 6233  | DER_IFN_GAMMA_RESPONSE_UP                    | 5   | 68   | 16185 | 62   | 19.27538 | 5.94E-06 |
| turquoise   | 5240  | GRAESSMANN_RESPONSE_TO_MC_AND_DOXORUBICIN    | 244 | 746  | 15507 | 4169 | 1.275125 | 6.18E-06 |
| cyan        | 4891  | FULCHER_INFLAMMATORY_RESPONSE_LLECTIN_VS_LPS | 11  | 437  | 15816 | 77   | 5.313174 | 6.33E-06 |
| blue        | 1375  | ATPASE_ACTIVITY                              | 38  | 103  | 16150 | 2978 | 2.013517 | 6.40E-06 |
| turquoise   | 6383  | NOUZOVA_TRETINOIN_AND_H4_ACETYLATION         | 59  | 137  | 16116 | 4169 | 1.678932 | 6.47E-06 |
| purple      | 6303  | TAVOR_CEBPA_TARGETS_DN                       | 5   | 28   | 16225 | 157  | 18.48612 | 6.48E-06 |
| magenta     | 6361  | VERHAAK_AML_WITH_NPM1_MUTATED_DN             | 12  | 238  | 16015 | 167  | 4.90706  | 6.53E-06 |
| lightcyan   | 9027  | GSE17721_PAM3CSK4_VS_GADIQUIMOD_4H_BMDM_     | 7   | 186  | 16067 | 62   | 9.865678 | 6.64E-06 |
| blue        | 9474  | GSE26495_NAIVE_VS_PD1LOW_CD8_TCELL_UP        | 60  | 190  | 16063 | 2978 | 1.723481 | 6.68E-06 |
| purple      | 3527  | MODULE_38                                    | 15  | 395  | 15858 | 157  | 3.931226 | 6.75E-06 |
| pink        | 6246  | SCHURINGA_STAT5A_TARGETS_UP                  | 5   | 20   | 16233 | 228  | 17.82127 | 6.79E-06 |
| blue        | 8612  | GSE14000_TRANSLATED_RNA_VS_MRNA_16H_LPS_DC   | 46  | 134  | 16119 | 2978 | 1.873535 | 6.95E-06 |
| lightgreen  | 9308  | GSE22886_NAIVE_CD8_TCELL_VS_MEMORY_TCELL_UP  | 6   | 183  | 16070 | 42   | 12.68774 | 7.03E-06 |
| brown       | 7433  | HSIAO_HOUSEKEEPING_GENES                     | 83  | 385  | 15868 | 2190 | 1.599951 | 7.07E-06 |
| lightcyan   | 8522  | GSE12845_PRE_GC_VS_DARKZONE_GC_TONSIL_BCELL  | 7   | 188  | 16065 | 62   | 9.760724 | 7.12E-06 |
| turquoise   | 2054  | GACTGT,MIR-101                               | 87  | 223  | 16030 | 4169 | 1.520954 | 7.14E-06 |

|             |                                                   |     |      |       |      |          |          |
|-------------|---------------------------------------------------|-----|------|-------|------|----------|----------|
| magenta     | 8546 GSE13411_NAIVE_VS_IGM_MEMORY_BCELL_UP        | 10  | 163  | 16090 | 167  | 5.970758 | 7.15E-06 |
| turquoise   | 9736 GSE31082_DP_VS_CD4_SP_THYMOCYTE_UP           | 78  | 195  | 16058 | 4169 | 1.559415 | 7.17E-06 |
| lightcyan   | 6623 HAN_JNK_SINGALING_UP                         | 4   | 33   | 16220 | 62   | 31.77517 | 7.23E-06 |
| magenta     | 946 HUMORAL_IMMUNE_RESPONSE                       | 5   | 27   | 16226 | 167  | 18.02284 | 7.25E-06 |
| lightcyan   | 8923 GSE17721_LPS_VS_POLYIC_8H_BMDM_DN            | 7   | 189  | 16064 | 62   | 9.70908  | 7.37E-06 |
| turquoise   | 7692 DANG_BOUND_BY_MYC                            | 330 | 1049 | 15204 | 4169 | 1.226422 | 7.39E-06 |
| lightgreen  | 10160 GSE7460_CD8_TCELL_VS_CD4_TCELL_ACT_UP       | 6   | 185  | 16068 | 42   | 12.55058 | 7.48E-06 |
| blue        | 61 NUCLEAR_PART                                   | 143 | 557  | 15696 | 2978 | 1.401166 | 7.49E-06 |
| lightgreen  | 3519 MODULE_27                                    | 7   | 285  | 15968 | 42   | 9.504678 | 7.55E-06 |
| turquoise   | 2064 ATATGCA,MIR-448                              | 75  | 186  | 16067 | 4169 | 1.571991 | 7.59E-06 |
| turquoise   | 10248 GSE9037_WT_VS_IRAK4_KO_BMDM_UP              | 75  | 186  | 16067 | 4169 | 1.571991 | 7.59E-06 |
| brown       | 9921 GSE36476_YOUNG_VS_OLD_DONOR_MEMORY_CD4_T     | 48  | 189  | 16064 | 2190 | 1.884816 | 7.61E-06 |
| brown       | 10280 GSE9988_LPS_VS_LPS_AND_ANTI_TREM1_MONOCYTE  | 48  | 189  | 16064 | 2190 | 1.884816 | 7.61E-06 |
| turquoise   | 5176 ENK_UV_RESPONSE KERATINOCYTE_DN              | 162 | 468  | 15785 | 4169 | 1.349494 | 7.70E-06 |
| turquoise   | 2133 AAGCACT,MIR-520F                             | 84  | 214  | 16039 | 4169 | 1.530267 | 7.74E-06 |
| blue        | 2381 MORF_EIF3S2                                  | 72  | 241  | 16012 | 2978 | 1.630513 | 7.82E-06 |
| pink        | 5150 HAHTOLA_SEZARY_SYNDROM_UP                    | 9   | 96   | 16157 | 228  | 6.682977 | 8.08E-06 |
| turquoise   | 1979 TTTGCAC,MIR-19A,MIR-19B                      | 161 | 465  | 15788 | 4169 | 1.349816 | 8.08E-06 |
| magenta     | 635 IMMUNE_RESPONSE                               | 11  | 203  | 16050 | 167  | 5.273679 | 8.13E-06 |
| blue        | 8692 GSE1460_INTRATHYMIC_T_PROGENITOR_VS_THYMIC_  | 59  | 187  | 16066 | 2978 | 1.721945 | 8.19E-06 |
| greenyello  | 4365 REACTOME_SIGNALING_BY_GPCR                   | 15  | 421  | 15832 | 150  | 3.86057  | 8.28E-06 |
| salmon      | 2498 GCM_ANP32B                                   | 5   | 36   | 16217 | 127  | 17.7745  | 8.36E-06 |
| brown       | 5298 MCBRYAN_PUBERTAL_BREAST_6_7WK_UP             | 46  | 179  | 16074 | 2190 | 1.907191 | 8.37E-06 |
| cyan        | 6124 IIZUKA_LIVER_CANCER_PROGRESSION_G1_G2_UP     | 3   | 9    | 16244 | 77   | 70.35931 | 8.41E-06 |
| greenyello  | 10160 GSE7460_CD8_TCELL_VS_CD4_TCELL_ACT_UP       | 10  | 185  | 16068 | 150  | 5.856937 | 8.45E-06 |
| turquoise   | 205 PROTEIN_COMPLEX                               | 242 | 742  | 15511 | 4169 | 1.27149  | 8.47E-06 |
| cyan        | 5195 CASTELLANO_NRAS_TARGETS_UP                   | 5   | 59   | 16194 | 77   | 17.88796 | 8.58E-06 |
| turquoise   | 8421 GSE10239_MEMORY_VS_DAY4.5_EFF_CD8_TCELL_DN   | 79  | 199  | 16054 | 4169 | 1.54766  | 8.75E-06 |
| magenta     | 6377 BASSO_CD40_SIGNALING_UP                      | 8   | 100  | 16153 | 167  | 7.785868 | 8.76E-06 |
| pink        | 75 CYTOSOLIC_PART                                 | 5   | 21   | 16232 | 228  | 16.97264 | 8.81E-06 |
| magenta     | 10264 GSE9650_EXHAUSTED_VS_MEMORY_CD8_TCELL_UP    | 10  | 167  | 16086 | 167  | 5.827746 | 8.85E-06 |
| purple      | 8007 TORCHIA_TARGETS_OF_EWSR1_FLI1_FUSION_DN      | 13  | 307  | 15946 | 157  | 4.38368  | 9.00E-06 |
| lightgreen  | 2845 KEGG_NATURAL_KILLER_CELL_MEDIATED_CYTOTOXICI | 5   | 110  | 16143 | 42   | 17.58983 | 9.03E-06 |
| red         | 931 RESPONSE_TO_WOUNDING                          | 17  | 153  | 16100 | 524  | 3.446353 | 9.09E-06 |
| purple      | 7879 FIGUEROA_AML_METHYLATION_CLUSTER_1_UP        | 8   | 107  | 16146 | 157  | 7.739985 | 9.20E-06 |
| magenta     | 807 IMMUNE_SYSTEM_PROCESS                         | 13  | 289  | 15964 | 167  | 4.377867 | 9.22E-06 |
| purple      | 4673 REACTOME_PLATELET_AGGREGATION_PLUG_FORMAT    | 5   | 30   | 16223 | 157  | 17.25372 | 9.25E-06 |
| lightgreen  | 8391 KAECH_NAIVE_VS_MEMORY_CD8_TCELL_DN           | 6   | 192  | 16061 | 42   | 12.09301 | 9.26E-06 |
| turquoise   | 9430 GSE24142_ADULT_VS_FETAL_DN3_THYMOCYTE_UP     | 76  | 190  | 16063 | 4169 | 1.559415 | 9.34E-06 |
| brown       | 7370 SWEET_LUNG_CANCER_KRAS_UP                    | 92  | 441  | 15812 | 2190 | 1.548241 | 9.43E-06 |
| purple      | 3544 MODULE_55                                    | 19  | 624  | 15629 | 157  | 3.152121 | 9.48E-06 |
| lightgreen  | 9786 GSE34205_HEALTHY_VS_RSV_INF_INFANT_PBMUC_UP  | 6   | 193  | 16060 | 42   | 12.03035 | 9.53E-06 |
| lightgreen  | 10259 GSE9650_NAIVE_VS_MEMORY_CD8_TCELL_DN        | 6   | 193  | 16060 | 42   | 12.03035 | 9.53E-06 |
| turquoise   | 4947 GRABARCZYK_BCL11B_TARGETS_UP                 | 38  | 78   | 16175 | 4169 | 1.899287 | 9.60E-06 |
| blue        | 9979 GSE3982_EOSINOPHIL_VS_BCELL_DN               | 60  | 192  | 16061 | 2978 | 1.705528 | 9.61E-06 |
| turquoise   | 9752 GSE32423_CTRL_VS_IL7_IL4_MEMORY_CD8_TCELL_UP | 74  | 184  | 16069 | 4169 | 1.56789  | 9.71E-06 |
| brown       | 2646 GNF2_HCK                                     | 29  | 94   | 16159 | 2190 | 2.2896   | 9.72E-06 |
| purple      | 7248 VART_KSHV_INFECTION_ANGIOGENIC_MARKERS_UP    | 9   | 142  | 16111 | 157  | 6.561272 | 9.73E-06 |
| lightgreen  | 8422 GSE10325_CD4_TCELL_VS_BCELL_UP               | 6   | 194  | 16059 | 42   | 11.96834 | 9.82E-06 |
| blue        | 821 TRANSCRIPTION                                 | 166 | 667  | 15586 | 2978 | 1.358286 | 9.92E-06 |
| salmon      | 679 CELLULAR_PROTEIN_METABOLIC_PROCESS            | 22  | 1005 | 15248 | 127  | 2.801473 | 9.94E-06 |
| turquoise   | 2565 GCM_ZNF198                                   | 51  | 115  | 16138 | 4169 | 1.728916 | 9.96E-06 |
| blue        | 10055 GSE3982_NEUTROPHIL_VS_NKCELL_DN             | 58  | 184  | 16069 | 2978 | 1.720359 | 1.00E-05 |
| turquoise   | 2326 MORF_RAD23B                                  | 72  | 178  | 16075 | 4169 | 1.576936 | 1.01E-05 |
| turquoise   | 6407 BROWNE_HCMV_INFECTION_16HR_UP                | 82  | 209  | 16044 | 4169 | 1.529569 | 1.01E-05 |
| lightgreen  | 8401 GOLDRATH_NAIVE_VS_MEMORY_CD8_TCELL_DN        | 6   | 195  | 16058 | 42   | 11.90696 | 1.01E-05 |
| red         | 9414 GSE24142_EARLY_THYMIC_PROGENITOR_VS_DN2_THY  | 19  | 187  | 16066 | 524  | 3.151478 | 1.02E-05 |
| turquoise   | 307 BIOPOLYMER_METABOLIC_PROCESS                  | 463 | 1529 | 14724 | 4169 | 1.180525 | 1.02E-05 |
| lightyellow | 8576 GSE13485_CTRL_VS_DAY3_YF17D_VACCINE_PBMUC_UP | 5   | 145  | 16108 | 33   | 16.98328 | 1.02E-05 |
| magenta     | 7204 QI_PLASMACYTOMA_UP                           | 12  | 249  | 16004 | 167  | 4.690282 | 1.03E-05 |

|            |                                                    |     |      |       |      |          |          |
|------------|----------------------------------------------------|-----|------|-------|------|----------|----------|
| salmon     | 9387 GSE22886_IL2_VS_IL15_STIM_NKCELL_DN           | 9   | 177  | 16076 | 127  | 6.507273 | 1.04E-05 |
| turquoise  | 2455 MORF_RAB5A                                    | 44  | 95   | 16158 | 4169 | 1.805638 | 1.04E-05 |
| turquoise  | 2156 GTTATAT,MIR-410                               | 39  | 81   | 16172 | 4169 | 1.877073 | 1.05E-05 |
| magenta    | 4219 REACTOME_ANTIGEN_ACTIVATES_B_CELL_RECEPTOR_   | 5   | 29   | 16224 | 167  | 16.77989 | 1.05E-05 |
| purple     | 3523 MODULE_33                                     | 13  | 312  | 15941 | 157  | 4.313429 | 1.07E-05 |
| blue       | 4307 REACTOME_PROCESSING_OF_CAPPED_INTRON_CONT/    | 46  | 136  | 16117 | 2978 | 1.845983 | 1.08E-05 |
| lightcyan  | 4951 HORIUCHI_WTAP_TARGETS_UP                      | 8   | 281  | 15972 | 62   | 7.463207 | 1.09E-05 |
| purple     | 6320 PETROVA_ENDOTHELIUM_LYMPHATIC_VS_BLOOD_DN     | 9   | 144  | 16109 | 157  | 6.470143 | 1.09E-05 |
| magenta    | 9653 GSE29617_DAY3_VS_DAY7_TIV_FLU_VACCINE_PBMCC_  | 10  | 171  | 16082 | 167  | 5.691424 | 1.09E-05 |
| turquoise  | 3212 chr3q26                                       | 25  | 44   | 16209 | 4169 | 2.215078 | 1.10E-05 |
| turquoise  | 3784 MODULE_332                                    | 25  | 44   | 16209 | 4169 | 2.215078 | 1.10E-05 |
| red        | 5848 RICKMAN_TUMOR_DIFFERENTIATED_WELL_VS_POORL    | 27  | 333  | 15920 | 524  | 2.514906 | 1.12E-05 |
| greenyello | 8389 KAECH_NAIVE_VS_DAY15_EFF_CD8_TCELL_DN         | 10  | 191  | 16062 | 150  | 5.672949 | 1.12E-05 |
| lightcyan  | 8078 PLASARI_TGFB1_TARGETS_10HR_DN                 | 7   | 202  | 16051 | 62   | 9.084238 | 1.14E-05 |
| turquoise  | 9926 GSE37416_CTRL_VS_6H_F_TULARENSIS_LVS_NEUTROP  | 77  | 194  | 16059 | 4169 | 1.547357 | 1.14E-05 |
| blue       | 9360 GSE22886_NAIVE_TCELL_VS_DC_UP                 | 60  | 193  | 16060 | 2978 | 1.696691 | 1.15E-05 |
| pink       | 3703 MODULE_227                                    | 4   | 11   | 16242 | 228  | 25.92185 | 1.15E-05 |
| greenyello | 8391 KAECH_NAIVE_VS_MEMORY_CD8_TCELL_DN            | 10  | 192  | 16061 | 150  | 5.643403 | 1.17E-05 |
| blue       | 9472 GSE26495_NAIVE_VS_PD1HIGH_CD8_TCELL_UP        | 59  | 189  | 16064 | 2978 | 1.703723 | 1.18E-05 |
| blue       | 182 INTRACELLULAR_ORGANELLE_PART                   | 261 | 1125 | 15128 | 2978 | 1.266184 | 1.18E-05 |
| salmon     | 9366 GSE22886_NAIVE_BCELL_VS_DC_UP                 | 9   | 180  | 16073 | 127  | 6.398819 | 1.19E-05 |
| blue       | 3 ORGANELLE_PART                                   | 262 | 1130 | 15123 | 2978 | 1.265411 | 1.19E-05 |
| blue       | 8011 YUAN_ZNF143_PARTNERS                          | 13  | 21   | 16232 | 2978 | 3.37857  | 1.19E-05 |
| salmon     | 935 CELLULAR_MACROMOLECULE_METABOLIC_PROCESS       | 22  | 1017 | 15236 | 127  | 2.768417 | 1.20E-05 |
| turquoise  | 10162 GSE7460_TREG_VS_TCONV_ACT_UP                 | 74  | 185  | 16068 | 4169 | 1.559415 | 1.22E-05 |
| greenyello | 10259 GSE9650_NAIVE_VS_MEMORY_CD8_TCELL_DN         | 10  | 193  | 16060 | 150  | 5.614162 | 1.23E-05 |
| blue       | 3716 MODULE_244                                    | 57  | 181  | 16072 | 2978 | 1.71872  | 1.23E-05 |
| lightcyan  | 3572 MODULE_84                                     | 10  | 480  | 15773 | 62   | 5.461358 | 1.25E-05 |
| red        | 9277 GSE20366_CD103_POS_VS_CD103_KLRG1_DP_TREG_D   | 18  | 173  | 16080 | 524  | 3.227221 | 1.25E-05 |
| salmon     | 8153 HOLLEMAN_VINCRISTINE_RESISTANCE_ALL_DN        | 4   | 19   | 16234 | 127  | 26.9424  | 1.26E-05 |
| pink       | 7188 LIN_NPAS4_TARGETS_DN                          | 7   | 56   | 16197 | 228  | 8.910636 | 1.26E-05 |
| salmon     | 8127 BOUDOUKHA_BOUND_BY_IGF2BP2                    | 7   | 100  | 16153 | 127  | 8.958346 | 1.32E-05 |
| greenyello | 9372 GSE22886_NAIVE_CD8_TCELL_VS_DC_UP             | 10  | 195  | 16058 | 150  | 5.556581 | 1.34E-05 |
| blue       | 3598 MODULE_110                                    | 11  | 16   | 16237 | 2978 | 3.752162 | 1.35E-05 |
| purple     | 4928 CHARAFE_BREAST_CANCER_LUMINAL_VS_MESENCHYM    | 15  | 419  | 15834 | 157  | 3.706049 | 1.36E-05 |
| turquoise  | 5901 BENPORATH_NANOG_TARGETS                       | 291 | 918  | 15335 | 4169 | 1.235811 | 1.36E-05 |
| lightgreen | 227 PLASMA_MEMBRANE                                | 12  | 1095 | 15158 | 42   | 4.240835 | 1.37E-05 |
| cyan       | 5221 GRAESSMANN_APOPTOSIS_BY_SERUM_DEPRIVATION_    | 11  | 475  | 15778 | 77   | 4.88812  | 1.39E-05 |
| greenyello | 5905 BENPORATH_SUZ12_TARGETS                       | 18  | 612  | 15641 | 150  | 3.186863 | 1.40E-05 |
| turquoise  | 5744 PUJANA_ATM_PCC_NETWORK                        | 403 | 1317 | 14936 | 4169 | 1.192946 | 1.41E-05 |
| turquoise  | 3422 chr6q22                                       | 26  | 47   | 16206 | 4169 | 2.156637 | 1.41E-05 |
| turquoise  | 9340 GSE22886_IGG_IGA_MEMORY_BCELL_VS_BM_PLASMA/   | 77  | 195  | 16058 | 4169 | 1.539422 | 1.42E-05 |
| purple     | 4237 REACTOME_CELL_SURFACE_INTERACTIONS_AT_THE_V.  | 7   | 82   | 16171 | 157  | 8.837269 | 1.42E-05 |
| turquoise  | 7187 LIN_NPAS4_TARGETS_UP                          | 62  | 149  | 16104 | 4169 | 1.62221  | 1.43E-05 |
| blue       | 9964 GSE3982_DC_VS_MAC_LPS_STIM_UP                 | 58  | 186  | 16067 | 2978 | 1.70186  | 1.44E-05 |
| purple     | 3494 MODULE_1                                      | 13  | 321  | 15932 | 157  | 4.192492 | 1.45E-05 |
| red        | 4894 ZHOU_INFLAMMATORY_RESPONSE_LIVE_UP            | 29  | 377  | 15876 | 524  | 2.385937 | 1.45E-05 |
| red        | 10282 GSE9988_LPS_VS_CTRL_TREATED_MONOCYTE_UP      | 18  | 175  | 16078 | 524  | 3.190338 | 1.46E-05 |
| lightcyan  | 4638 REACTOME_TRAF3_DEPENDENT_IRF_ACTIVATION_PAT   | 3   | 13   | 16240 | 62   | 60.49504 | 1.47E-05 |
| lightcyan  | 7394 LEE_SP4_THYMOCYTE                             | 3   | 13   | 16240 | 62   | 60.49504 | 1.47E-05 |
| magenta    | 9296 GSE20715_0H_VS_24H_OZONE_TLR4_KO_LUNG_UP      | 10  | 177  | 16076 | 167  | 5.498495 | 1.47E-05 |
| salmon     | 10124 GSE5960_TH1_VS_ANERGIC_TH1_UP                | 9   | 185  | 16068 | 127  | 6.225878 | 1.48E-05 |
| blue       | 8706 GSE1460_CD4_THYMOCYTE_VS_THYMIC_STROMAL_CE    | 57  | 182  | 16071 | 2978 | 1.709276 | 1.48E-05 |
| red        | 7042 ACEVEDO_METHYLATED_IN_LIVER_CANCER_DN         | 37  | 542  | 15711 | 524  | 2.117409 | 1.50E-05 |
| turquoise  | 6163 TARTE_PLASMA_CELL_VS_PLASMABLAST_DN           | 112 | 307  | 15946 | 4169 | 1.422268 | 1.50E-05 |
| cyan       | 6518 KRASNOSELSKAYA_ILF3_TARGETS_UP                | 4   | 32   | 16221 | 77   | 26.38474 | 1.51E-05 |
| brown      | 8603 GSE13738_RESTING_VS_TCR_ACTIVATED_CD4_TCELL_I | 49  | 199  | 16054 | 2190 | 1.827395 | 1.52E-05 |
| brown      | 9348 GSE22886_DAY0_VS_DAY7_MONOCYTE_IN_CULTURE_    | 49  | 199  | 16054 | 2190 | 1.827395 | 1.52E-05 |
| brown      | 9361 GSE22886_NAIVE_TCELL_VS_DC_DN                 | 49  | 199  | 16054 | 2190 | 1.827395 | 1.52E-05 |
| turquoise  | 1949 TGAATGT,MIR-181A,MIR-181B,MIR-181C,MIR-181D   | 145 | 416  | 15837 | 4169 | 1.358865 | 1.52E-05 |

|            |                                                    |     |     |       |      |          |          |
|------------|----------------------------------------------------|-----|-----|-------|------|----------|----------|
| midnightb  | 9958 GSE3982_MEMORY_CD4_TCELL_VS_TH1_UP            | 7   | 184 | 16069 | 71   | 8.708742 | 1.53E-05 |
| salmon     | 6480 HEDENFALK_BREAST_CANCER_BRACX_UP              | 4   | 20  | 16233 | 127  | 25.59528 | 1.56E-05 |
| cyan       | 5277 MISSIAGLIA_REGULATED_BY_METHYLATION_UP        | 6   | 113 | 16140 | 77   | 11.20768 | 1.57E-05 |
| turquoise  | 2139 GTGCAA,MIR-507                                | 46  | 102 | 16151 | 4169 | 1.758164 | 1.57E-05 |
| lightcyan  | 8222 MTOR_UP.V1_UP                                 | 6   | 141 | 16112 | 62   | 11.15511 | 1.58E-05 |
| red        | 9998 GSE3982_MAST_CELL_VS_BCELL_UP                 | 18  | 176 | 16077 | 524  | 3.172211 | 1.58E-05 |
| magenta    | 9333 GSE22886_IGA_VS_IGM_MEMORY_BCELL_DN           | 10  | 179 | 16074 | 167  | 5.437059 | 1.63E-05 |
| cyan       | 5044 TONKS_TARGETS_OF_RUNX1_RUNX1T1_FUSION_HSC_    | 7   | 171 | 16082 | 77   | 8.640617 | 1.63E-05 |
| turquoise  | 4966 WANG_LMO4_TARGETS_UP                          | 121 | 337 | 15916 | 4169 | 1.399771 | 1.64E-05 |
| magenta    | 4873 SENGUPTA_NASOPHARYNGEAL_CARCINOMA_WITH_LN     | 8   | 109 | 16144 | 167  | 7.142998 | 1.65E-05 |
| turquoise  | 5083 TIEN_INTESTINE_PROBIOTICS_24HR_UP             | 183 | 545 | 15708 | 4169 | 1.30905  | 1.66E-05 |
| purple     | 8564 GSE13484_UNSTIM_VS_12H_YF17D_VACCINE_STIM_PI  | 10  | 191 | 16062 | 157  | 5.420015 | 1.67E-05 |
| cyan       | 8198 EGFR_UP.V1_UP                                 | 7   | 172 | 16081 | 77   | 8.590381 | 1.70E-05 |
| red        | 10290 GSE9988_LOW_LPS_VS_VEHICLE_TREATED_MONOCYTI  | 18  | 177 | 16076 | 524  | 3.154289 | 1.71E-05 |
| red        | 9463 GSE24634_IL4_VS_CTRL_TREATED_NAIVE_CD4_TCELL_ | 19  | 194 | 16059 | 524  | 3.037765 | 1.72E-05 |
| brown      | 6363 APPEL_IMATINIB_RESPONSE                       | 14  | 31  | 16222 | 2190 | 3.351628 | 1.74E-05 |
| lightcyan  | 5590 KANG_GIST_WITH_PDGFR_A_UP                     | 4   | 41  | 16212 | 62   | 25.57514 | 1.75E-05 |
| turquoise  | 9230 GSE18791_CTRL_VS_NEWCASTLE_VIRUS_DC_12H_UP    | 77  | 196 | 16057 | 4169 | 1.531568 | 1.75E-05 |
| salmon     | 2692 GNF2_RBBP6                                    | 6   | 70  | 16183 | 127  | 10.9694  | 1.76E-05 |
| cyan       | 8259 MEK_UP.V1_DN                                  | 7   | 173 | 16080 | 77   | 8.540725 | 1.76E-05 |
| lightcyan  | 6703 BAELDE_DIABETIC_NEPHROPATHY_DN                | 9   | 396 | 15857 | 62   | 5.957845 | 1.79E-05 |
| turquoise  | 8740 GSE15324_ELF4_KO_VS_WT_ACTIVATED_CD8_TCELL_U  | 76  | 193 | 16060 | 4169 | 1.535175 | 1.80E-05 |
| pink       | 3549 MODULE_60                                     | 17  | 368 | 15885 | 228  | 3.293061 | 1.80E-05 |
| brown      | 9879 GSE360_T_GONDII_VS_B_MALAYI_HIGH_DOSE_MAC_I   | 46  | 184 | 16069 | 2190 | 1.855365 | 1.81E-05 |
| magenta    | 7053 SMID_BREAST_CANCER_RELAPSE_IN_BONE_DN         | 11  | 221 | 16032 | 167  | 4.844149 | 1.81E-05 |
| blue       | 2377 MORF_DEAF1                                    | 24  | 56  | 16197 | 2978 | 2.33901  | 1.84E-05 |
| cyan       | 7863 CHICAS_RB1_TARGETS_CONFLUENT                  | 11  | 490 | 15763 | 77   | 4.738484 | 1.85E-05 |
| brown      | 2647 GNF2_HLA-C                                    | 18  | 47  | 16206 | 2190 | 2.842262 | 1.85E-05 |
| brown      | 2694 GNF2_S100A4                                   | 18  | 47  | 16206 | 2190 | 2.842262 | 1.85E-05 |
| turquoise  | 2452 MORF_RAB11A                                   | 30  | 58  | 16195 | 4169 | 2.016485 | 1.88E-05 |
| magenta    | 9999 GSE3982_MAST_CELL_VS_BCELL_DN                 | 10  | 182 | 16071 | 167  | 5.347437 | 1.88E-05 |
| lightcyan  | 8362 KRAS.300_UP.V1_DN                             | 5   | 86  | 16167 | 62   | 15.241   | 1.88E-05 |
| magenta    | 544 MULTICELLULAR_ORGANISMAL_DEVELOPMENT           | 21  | 729 | 15524 | 167  | 2.803553 | 1.90E-05 |
| lightcyan  | 246 RESPONSE_TO_VIRUS                              | 4   | 42  | 16211 | 62   | 24.96621 | 1.93E-05 |
| lightcyan  | 6356 ZHAN_MULTIPLE_MYELOMA_HP_UP                   | 4   | 42  | 16211 | 62   | 24.96621 | 1.93E-05 |
| greenyello | 7719 MIKKELSEN_NPC_HCP_WITH_H3K27ME3               | 9   | 162 | 16091 | 150  | 6.01963  | 1.94E-05 |
| brown      | 2969 BIOCARTA_ERK_PATHWAY                          | 12  | 24  | 16229 | 2190 | 3.710731 | 1.95E-05 |
| brown      | 4494 REACTOME_SEMA4D_INDUCED_CELL_MIGRATION_ANI    | 12  | 24  | 16229 | 2190 | 3.710731 | 1.95E-05 |
| purple     | 4976 SMIRNOV_CIRCULATING_ENDOTHELIOCYTES_IN_CANC   | 9   | 155 | 16098 | 157  | 6.010972 | 1.97E-05 |
| turquoise  | 5792 BUYTAERT_PHOTODYNAMIC_THERAPY_STRESS_UP       | 250 | 778 | 15475 | 4169 | 1.252743 | 1.97E-05 |
| cyan       | 8257 LTE2_UP.V1_DN                                 | 7   | 176 | 16077 | 77   | 8.395145 | 1.97E-05 |
| red        | 2674 GNF2_MYD88                                    | 10  | 60  | 16193 | 524  | 5.169529 | 1.97E-05 |
| purple     | 7443 MEISSNER_BRAIN_HCP_WITH_H3K4ME3_AND_H3K27M    | 21  | 779 | 15474 | 157  | 2.790716 | 1.97E-05 |
| salmon     | 9979 GSE3982_EOSINOPHIL_VS_BCELL_DN                | 9   | 192 | 16061 | 127  | 5.998893 | 1.98E-05 |
| cyan       | 7294 SEKI_INFLAMMATORY_RESPONSE_LPS_UP             | 5   | 70  | 16183 | 77   | 15.07699 | 1.99E-05 |
| cyan       | 7457 LIU_VAV3_PROSTATE_CARCINOGENESIS_UP           | 5   | 70  | 16183 | 77   | 15.07699 | 1.99E-05 |
| red        | 8933 GSE17721_POLYIC_VS_PAM3CSK4_1H_BMDM_DN        | 18  | 179 | 16074 | 524  | 3.119046 | 1.99E-05 |
| purple     | 8453 GSE11057_CD4_EFF_MEM_VS_PBMCDN                | 10  | 195 | 16058 | 157  | 5.308836 | 1.99E-05 |
| blue       | 8687 GSE1460_INTRATHYMIC_T_PROGENITOR_VS_CD4_THY   | 59  | 192 | 16061 | 2978 | 1.677103 | 1.99E-05 |
| blue       | 9394 GSE22886_NAIVE_CD4_TCELL_VS_12H_ACT_TH2_UP    | 59  | 192 | 16061 | 2978 | 1.677103 | 1.99E-05 |
| lightcyan  | 9197 GSE17974_IL4_AND_ANTI_IL12_VS_UNTREATED_12H_  | 6   | 147 | 16106 | 62   | 10.6998  | 2.00E-05 |
| turquoise  | 1957 TTGCACT,MIR-130A,MIR-301,MIR-130B             | 130 | 368 | 15885 | 4169 | 1.377201 | 2.00E-05 |
| brown      | 7350 RUTELLA_RESPONSE_TO_HGF_DN                    | 55  | 234 | 16019 | 2190 | 1.744361 | 2.00E-05 |
| cyan       | 8158 ALTEMEIER_RESPONSE_TO_LPS_WITH_MECHANICAL_V   | 6   | 118 | 16135 | 77   | 10.73278 | 2.01E-05 |
| cyan       | 9503 GSE2706_UNSTIM_VS_2H_LPS_DC_DN                | 7   | 177 | 16076 | 77   | 8.347714 | 2.04E-05 |
| salmon     | 2715 GNF2_UBE2I                                    | 5   | 43  | 16210 | 127  | 14.88097 | 2.04E-05 |
| salmon     | 5305 LUI_THYROID_CANCER_PAX8_PPARG_DN              | 5   | 43  | 16210 | 127  | 14.88097 | 2.04E-05 |
| greenyello | 3961 PID_IL12_2PATHWAY                             | 6   | 61  | 16192 | 150  | 10.6577  | 2.04E-05 |
| magenta    | 14 INTRINSIC_TO_PLASMA_MEMBRANE                    | 21  | 733 | 15520 | 167  | 2.788254 | 2.06E-05 |
| greenyello | 5906 BENPORATH_EED_TARGETS                         | 18  | 630 | 15623 | 150  | 3.09581  | 2.07E-05 |

|            |       |                                               |     |      |       |      |          |          |
|------------|-------|-----------------------------------------------|-----|------|-------|------|----------|----------|
| turquoise  | 5067  | SENESE_HDAC1_TARGETS_UP                       | 144 | 415  | 15838 | 4169 | 1.352745 | 2.11E-05 |
| turquoise  | 6688  | BURTON_ADIPOGENESIS_11                        | 28  | 53   | 16200 | 4169 | 2.059604 | 2.12E-05 |
| black      | 7725  | MIKKELSEN_MEF_HCP_WITH_H3K27ME3               | 17  | 300  | 15953 | 283  | 3.254429 | 2.13E-05 |
| red        | 9944  | GSE37416_12H_VS_24H_F_TULARENSIS_LVS_NEUTROI  | 19  | 197  | 16056 | 524  | 2.991504 | 2.13E-05 |
| pink       | 1599  | V\$GATA_C                                     | 12  | 196  | 16057 | 228  | 4.364393 | 2.14E-05 |
| red        | 10284 | GSE9988_LPS_VS_VEHICLE_TREATED_MONOCYTE_UP    | 18  | 180  | 16073 | 524  | 3.101718 | 2.15E-05 |
| turquoise  | 8781  | GSE15930_NAIVE_VS_24H_IN_VITRO_STIM_INFAB_CD  | 77  | 197  | 16056 | 4169 | 1.523794 | 2.16E-05 |
| purple     | 7863  | CHICAS_RB1_TARGETS_CONFLUENT                  | 16  | 490  | 15763 | 157  | 3.38032  | 2.16E-05 |
| blue       | 10017 | GSE3982_DC_VS_BCELL_DN                        | 56  | 180  | 16073 | 2978 | 1.697948 | 2.16E-05 |
| purple     | 6403  | REN_ALVEOLAR_RHABDOMYOSARCOMA_DN              | 14  | 384  | 15869 | 157  | 3.77425  | 2.18E-05 |
| magenta    | 41    | INTRINSIC_TO_MEMBRANE                         | 26  | 1041 | 15212 | 167  | 2.430747 | 2.21E-05 |
| turquoise  | 9747  | GSE32423_MEMORY_VS_NAIVE_CD8_TCELL_IL7_IL4_D  | 76  | 194  | 16059 | 4169 | 1.527262 | 2.22E-05 |
| salmon     | 2608  | GNF2_XRCC5                                    | 6   | 73   | 16180 | 127  | 10.51861 | 2.24E-05 |
| salmon     | 6839  | HILLION_HMGA1_TARGETS                         | 6   | 73   | 16180 | 127  | 10.51861 | 2.24E-05 |
| salmon     | 9372  | GSE22886_NAIVE_CD8_TCELL_VS_DC_UP             | 9   | 195  | 16058 | 127  | 5.906602 | 2.24E-05 |
| salmon     | 9895  | GSE36392_TYPE_2_MYELOID_VS_NEUTROPHIL_IL25_TI | 9   | 195  | 16058 | 127  | 5.906602 | 2.24E-05 |
| lightcyan  | 5050  | TONKS_TARGETS_OF_RUNX1_RUNX1T1_FUSION_ERYTI   | 6   | 150  | 16103 | 62   | 10.48581 | 2.24E-05 |
| turquoise  | 2009  | GTGCCAT,MIR-183                               | 65  | 160  | 16093 | 4169 | 1.583781 | 2.26E-05 |
| purple     | 10148 | GSE7400_CTRL_VS_CSF3_IN_VIVO_TREATED_PBMC_UI  | 10  | 198  | 16055 | 157  | 5.228399 | 2.28E-05 |
| turquoise  | 8530  | GSE13306_LAMINA_PROPRIA_VS_SPLEEN_TREG_UP     | 75  | 191  | 16062 | 4169 | 1.530839 | 2.28E-05 |
| brown      | 9458  | GSE24634_IL4_VS_CTRL_TREATED_NAIVE_CD4_TCELL_ | 47  | 191  | 16062 | 2190 | 1.826223 | 2.28E-05 |
| blue       | 10014 | GSE3982_DC_VS_NEUTROPHIL_UP                   | 60  | 197  | 16056 | 2978 | 1.662241 | 2.29E-05 |
| blue       | 605   | RNA_PROCESSING                                | 53  | 168  | 16085 | 2978 | 1.721771 | 2.31E-05 |
| salmon     | 2591  | GNF2_HDAC1                                    | 7   | 109  | 16144 | 127  | 8.218666 | 2.32E-05 |
| purple     | 4431  | REACTOME_MUSCLE_CONTRACTION                   | 5   | 36   | 16217 | 157  | 14.3781  | 2.34E-05 |
| purple     | 5657  | GRUETZMANN_PANCREATIC_CANCER_UP               | 13  | 336  | 15917 | 157  | 4.005327 | 2.34E-05 |
| turquoise  | 8642  | GSE14308_TH1_VS_INDUCED_TREG_UP               | 74  | 188  | 16065 | 4169 | 1.53453  | 2.34E-05 |
| turquoise  | 8652  | GSE14308_NAIVE_CD4_TCELL_VS_INDUCED_TREG_UP   | 74  | 188  | 16065 | 4169 | 1.53453  | 2.34E-05 |
| yellow     | 10126 | GSE6269_HEALTHY_VS_FLU_INF_PBMC_UP            | 31  | 161  | 16092 | 1426 | 2.194572 | 2.35E-05 |
| magenta    | 2899  | KEGG_PRIMARY_IMMUNODEFICIENCY                 | 5   | 34   | 16219 | 167  | 14.31226 | 2.36E-05 |
| cyan       | 8681  | GSE1448_CTRL_VS_ANTI_VBETA5_DP_THYMOCYTE_DN   | 7   | 181  | 16072 | 77   | 8.163235 | 2.36E-05 |
| turquoise  | 2148  | ATGTACA,MIR-493                               | 101 | 274  | 15979 | 4169 | 1.437052 | 2.37E-05 |
| turquoise  | 6862  | ZHENG_BOUND_BY_FOXP3                          | 158 | 463  | 15790 | 4169 | 1.330386 | 2.38E-05 |
| turquoise  | 8189  | ZWANG_TRANSIENTLY_UP_BY_1ST_EGF_PULSE_ONLY    | 444 | 1472 | 14781 | 4169 | 1.175917 | 2.40E-05 |
| turquoise  | 9257  | GSE20151_CTRL_VS_FUSOBACT_NUCLEATUM_NEUTRC    | 73  | 185  | 16068 | 4169 | 1.538342 | 2.40E-05 |
| cyan       | 7068  | SMID_BREAST_CANCER_BASAL_UP                   | 11  | 504  | 15749 | 77   | 4.606859 | 2.40E-05 |
| turquoise  | 1976  | ACTGTGA,MIR-27A,MIR-27B                       | 144 | 416  | 15837 | 4169 | 1.349494 | 2.42E-05 |
| red        | 8346  | STK33_NOMO_UP                                 | 23  | 271  | 15982 | 524  | 2.632454 | 2.42E-05 |
| pink       | 4781  | REACTOME_METABOLISM_OF_PORPHYRINS             | 4   | 13   | 16240 | 228  | 21.93387 | 2.44E-05 |
| cyan       | 6657  | GEISS_RESPONSE_TO_DSRNA_UP                    | 4   | 36   | 16217 | 77   | 23.4531  | 2.44E-05 |
| turquoise  | 5623  | MARTORIATI_MDM4_TARGETS_FETAL_LIVER_DN        | 160 | 470  | 15783 | 4169 | 1.327161 | 2.45E-05 |
| red        | 7908  | CHYLA_CBFA2T3_TARGETS_UP                      | 27  | 348  | 15905 | 524  | 2.406505 | 2.46E-05 |
| red        | 9348  | GSE22886_DAY0_VS_DAY7_MONOCYTE_IN_CULTURE_    | 19  | 199  | 16054 | 524  | 2.961439 | 2.46E-05 |
| magenta    | 8374  | KRAS.LUNG_UP.V1_DN                            | 7   | 84   | 16169 | 167  | 8.110279 | 2.48E-05 |
| pink       | 5012  | TAKEDA_TARGETS_OF_NUP98_HOXA9_FUSION_8D_UF    | 10  | 138  | 16115 | 228  | 5.165586 | 2.50E-05 |
| turquoise  | 911   | PROTEIN_MODIFICATION_PROCESS                  | 189 | 569  | 15684 | 4169 | 1.294945 | 2.51E-05 |
| turquoise  | 8417  | GSE10239_KLRG1INT_VS_KLRG1HIGH_EFF_CD8_TCELL_ | 71  | 179  | 16074 | 4169 | 1.546347 | 2.52E-05 |
| cyan       | 8721  | GSE14769_UNSTIM_VS_80MIN_LPS_BMDM_DN          | 7   | 183  | 16070 | 77   | 8.074019 | 2.53E-05 |
| turquoise  | 5784  | NUYTEN_EZH2_TARGETS_UP                        | 297 | 946  | 15307 | 4169 | 1.223959 | 2.54E-05 |
| grey60     | 5015  | TAKEDA_TARGETS_OF_NUP98_HOXA9_FUSION_10D_D    | 5   | 130  | 16123 | 44   | 14.20717 | 2.56E-05 |
| turquoise  | 8961  | GSE17721_PAM3CSK4_VS_CPG_12H_BMDM_DN          | 70  | 176  | 16077 | 4169 | 1.550554 | 2.58E-05 |
| yellow     | 218   | MITOCHONDRIAL_MEMBRANE_PART                   | 15  | 52   | 16201 | 1426 | 3.287774 | 2.59E-05 |
| greenyello | 9725  | GSE30962_PRIMARY_VS_SECONDARY_CHRONIC_LCMV    | 9   | 168  | 16085 | 150  | 5.804643 | 2.60E-05 |
| magenta    | 8550  | GSE13411_NAIVE_BCELL_VS_PLASMA_CELL_UP        | 10  | 189  | 16064 | 167  | 5.149384 | 2.60E-05 |
| lightgreen | 2837  | KEGG_ANTIGEN_PROCESSING_AND_PRESENTATION      | 4   | 67   | 16186 | 42   | 23.10306 | 2.62E-05 |
| brown      | 9455  | GSE24634_TEFF_VS_TCONV_DAY10_IN_CULTURE_DN    | 47  | 192  | 16061 | 2190 | 1.816712 | 2.64E-05 |
| grey60     | 5017  | TAKEDA_TARGETS_OF_NUP98_HOXA9_FUSION_16D_D    | 5   | 131  | 16122 | 44   | 14.09872 | 2.66E-05 |
| salmon     | 2467  | MORF_SKP1A                                    | 9   | 200  | 16053 | 127  | 5.758937 | 2.74E-05 |
| pink       | 7912  | WIERENGA_STAT5A_TARGETS_UP                    | 12  | 201  | 16052 | 228  | 4.255826 | 2.75E-05 |
| lightcyan  | 8293  | ALK_DN.V1_DN                                  | 5   | 93   | 16160 | 62   | 14.09383 | 2.75E-05 |

|             |                                                    |     |      |       |      |          |          |
|-------------|----------------------------------------------------|-----|------|-------|------|----------|----------|
| blue        | 8696 GSE1460_DP_THYMOCYTE_VS_NAIVE_CD4_TCELL_COR   | 59  | 194  | 16059 | 2978 | 1.659813 | 2.80E-05 |
| red         | 3596 MODULE_108                                    | 8   | 39   | 16214 | 524  | 6.362498 | 2.82E-05 |
| lightgreen  | 59 MEMBRANE                                        | 14  | 1601 | 14652 | 42   | 3.383927 | 2.84E-05 |
| yellow      | 6876 SANSOM_APC_MYC_TARGETS                        | 37  | 209  | 16044 | 1426 | 2.01776  | 2.85E-05 |
| salmon      | 6095 LEE_LIVER_CANCER_MYC_UP                       | 5   | 46   | 16207 | 127  | 13.91048 | 2.85E-05 |
| red         | 7348 RUTELLA_RESPONSE_TO_CSF2RB_AND_IL4_DN         | 25  | 312  | 15941 | 524  | 2.485351 | 2.87E-05 |
| red         | 3622 MODULE_134                                    | 6   | 20   | 16233 | 524  | 9.305153 | 2.88E-05 |
| turquoise   | 9127 GSE17721_0.5H_VS_12H_CPG_BMDM_DN              | 74  | 189  | 16064 | 4169 | 1.526411 | 2.89E-05 |
| cyan        | 8571 GSE13484_12H_VS_3H_YF17D_VACCINE_STIM_PBMC_   | 7   | 187  | 16066 | 77   | 7.901313 | 2.91E-05 |
| cyan        | 9300 GSE2197_IMMUNOSUPPRESSIVE_DNA_VS_UNTREATED    | 7   | 187  | 16066 | 77   | 7.901313 | 2.91E-05 |
| brown       | 6931 STEARMAN_LUNG_CANCER_EARLY_VS_LATE_DN         | 20  | 57   | 16196 | 2190 | 2.604021 | 2.92E-05 |
| salmon      | 2387 MORF_ERH                                      | 7   | 113  | 16140 | 127  | 7.92774  | 2.93E-05 |
| magenta     | 8458 GSE11057_PBMC_VS_MEM_CD4_TCELL_UP             | 10  | 192  | 16061 | 167  | 5.068925 | 2.97E-05 |
| turquoise   | 4919 DEURIG_T_CELL_PROLYMPHOCYTIC_LEUKEMIA_DN      | 111 | 308  | 15945 | 4169 | 1.404992 | 3.00E-05 |
| lightyellow | 6954 MARTINEZ_RB1_TARGETS_DN                       | 7   | 457  | 15796 | 33   | 7.543996 | 3.01E-05 |
| pink        | 10139 GSE6269_FLU_VS_STREP_PNEUMO_INF_PBMC_DN      | 10  | 141  | 16112 | 228  | 5.05568  | 3.01E-05 |
| cyan        | 7683 ZHAN_MULTIPLE_MYELOMA_LB_DN                   | 4   | 38   | 16215 | 77   | 22.21873 | 3.04E-05 |
| turquoise   | 9141 GSE17721_0.5H_VS_4H_GARDIQUIMOD_BMDM_DN       | 72  | 183  | 16070 | 4169 | 1.533851 | 3.05E-05 |
| turquoise   | 10243 GSE9037_CTRL_VS_LPS_4H_STIM_BMDM_DN          | 72  | 183  | 16070 | 4169 | 1.533851 | 3.05E-05 |
| salmon      | 2244 SCGGAAGY_V\$ELK1_02                           | 23  | 1162 | 15091 | 127  | 2.533095 | 3.05E-05 |
| purple      | 6703 BAELDE_DIABETIC_NEPHROPATHY_DN                | 14  | 396  | 15857 | 157  | 3.659879 | 3.06E-05 |
| blue        | 5158 PROVENZANI_METASTASIS_UP                      | 56  | 182  | 16071 | 2978 | 1.679289 | 3.07E-05 |
| turquoise   | 724 BIOPOLYMER_MODIFICATION                        | 194 | 588  | 15665 | 4169 | 1.286252 | 3.09E-05 |
| magenta     | 8495 GSE12366_GC_VS_NAIVE_BCELL_DN                 | 10  | 193  | 16060 | 167  | 5.042661 | 3.11E-05 |
| magenta     | 8496 GSE12366_GC_VS_MEMORY_BCELL_UP                | 10  | 193  | 16060 | 167  | 5.042661 | 3.11E-05 |
| red         | 9967 GSE3982_DC_VS_NEUTROPHIL_LPS_STIM_DN          | 17  | 168  | 16085 | 524  | 3.138643 | 3.11E-05 |
| lightgreen  | 8288 ESC_J1_UP_LATE.V1_UP                          | 5   | 142  | 16111 | 42   | 13.62592 | 3.11E-05 |
| lightgreen  | 9702 GSE29618_LAIV_VS_TIV_FLU_VACCINE_DAY7_BCELL_U | 5   | 142  | 16111 | 42   | 13.62592 | 3.11E-05 |
| cyan        | 9131 GSE17721_0.5H_VS_8H_CPG_BMDM_DN               | 7   | 189  | 16064 | 77   | 7.817701 | 3.11E-05 |
| cyan        | 9547 GSE27786_LIN_NEG_VS_BCELL_DN                  | 7   | 189  | 16064 | 77   | 7.817701 | 3.11E-05 |
| magenta     | 5127 GRAHAM_CML_DIVIDING_VS_NORMAL QUIESCENT_D     | 7   | 87   | 16166 | 167  | 7.830615 | 3.12E-05 |
| lightgreen  | 2664 GNF2_MATK                                     | 3   | 24   | 16229 | 42   | 48.37202 | 3.13E-05 |
| turquoise   | 2090 AGCATTAMIR-155                                | 53  | 125  | 16128 | 4169 | 1.65298  | 3.15E-05 |
| yellow      | 7250 MOOTHA_HUMAN_MITODB_6_2002                    | 61  | 411  | 15842 | 1426 | 1.691617 | 3.17E-05 |
| greenyello  | 7591 ONO_FOXP3_TARGETS_DN                          | 5   | 40   | 16213 | 150  | 13.54417 | 3.18E-05 |
| magenta     | 270 SYSTEM_DEVELOPMENT                             | 18  | 583  | 15670 | 167  | 3.004838 | 3.19E-05 |
| blue        | 9909 GSE36476_CTRL_VS_TSST_ACT_16H_MEMORY_CD4_T    | 60  | 199  | 16054 | 2978 | 1.645535 | 3.20E-05 |
| brown       | 7204 QI_PLASMACYTOMA_UP                            | 57  | 249  | 16004 | 2190 | 1.698889 | 3.22E-05 |
| pink        | 3267 chr1q32                                       | 9   | 114  | 16139 | 228  | 5.62777  | 3.25E-05 |
| magenta     | 6033 ONDER_CDH1_TARGETS_2_DN                       | 14  | 374  | 15879 | 167  | 3.64312  | 3.26E-05 |
| yellow      | 2283 GGGCGGR_V\$SP1_Q6                             | 288 | 2655 | 13598 | 1426 | 1.236352 | 3.26E-05 |
| brown       | 7406 ZHANG_TLX_TARGETS_36HR_UP                     | 50  | 210  | 16043 | 2190 | 1.767015 | 3.27E-05 |
| turquoise   | 2012 GTTTGTTMIR-495                                | 83  | 218  | 16035 | 4169 | 1.484305 | 3.27E-05 |
| purple      | 8110 PEDRIOLI_MIR31_TARGETS_DN                     | 13  | 347  | 15906 | 157  | 3.878357 | 3.27E-05 |
| red         | 5073 SENESE_HDAC3_TARGETS_UP                       | 32  | 456  | 15797 | 524  | 2.176644 | 3.33E-05 |
| cyan        | 8959 GSE17721_PAM3CSK4_VS_CPG_8H_BMDM_DN           | 7   | 191  | 16062 | 77   | 7.73584  | 3.33E-05 |
| lightcyan   | 691 RESPONSE_TO_BIOTIC_STIMULUS                    | 5   | 97   | 16156 | 62   | 13.51264 | 3.37E-05 |
| blue        | 9476 GSE26495_PD1HIGH_VS_PD1LOW_CD8_TCELL_UP       | 52  | 166  | 16087 | 2978 | 1.709638 | 3.41E-05 |
| brown       | 5045 TONKS_TARGETS_OF_RUNX1_RUNX1T1_FUSION_HSC_    | 45  | 183  | 16070 | 2190 | 1.824949 | 3.44E-05 |
| brown       | 9948 GSE3982_CTRL_VS_PMA_STIM_EOSINOPHIL_UP        | 45  | 183  | 16070 | 2190 | 1.824949 | 3.44E-05 |
| cyan        | 10050 GSE3982_NEUTROPHIL_VS EFF_MEMORY_CD4_TCELL_  | 7   | 192  | 16061 | 77   | 7.695549 | 3.44E-05 |
| lightcyan   | 4628 REACTOME_TRAF6_MEDIATED_IRF7_ACTIVATION       | 3   | 17   | 16236 | 62   | 46.26091 | 3.46E-05 |
| blue        | 4909 CASORELLI_ACUTE_PROMYELOCYTIC_LEUKEMIA_DN     | 160 | 653  | 15600 | 2978 | 1.337259 | 3.49E-05 |
| brown       | 6240 BROWN_MYELOID_CELL_DEVELOPMENT_UP             | 39  | 151  | 16102 | 2190 | 1.916801 | 3.49E-05 |
| brown       | 9928 GSE37416_CTRL_VS_12H_F_TULARENSIS_LVS_NEUTRO  | 47  | 194  | 16059 | 2190 | 1.797983 | 3.49E-05 |
| greenyello  | 3222 chr1q23                                       | 6   | 67   | 16186 | 150  | 9.703284 | 3.51E-05 |
| turquoise   | 1538 ACTAYRNNCCCR_UNKNOWN                          | 150 | 439  | 15814 | 4169 | 1.332074 | 3.52E-05 |
| turquoise   | 3334 chr2q33                                       | 36  | 76   | 16177 | 4169 | 1.846675 | 3.54E-05 |
| turquoise   | 4991 GARGALOVIC_RESPONSE_TO_OXIDIZED_PHOSPHOLIPID  | 36  | 76   | 16177 | 4169 | 1.846675 | 3.54E-05 |
| cyan        | 8495 GSE12366_GC_VS_NAIVE_BCELL_DN                 | 7   | 193  | 16060 | 77   | 7.655676 | 3.56E-05 |

|            |       |                                               |     |     |       |      |          |          |
|------------|-------|-----------------------------------------------|-----|-----|-------|------|----------|----------|
| green      | 4779  | REACTOME_GAP_JUNCTION_TRAFFICKING             | 8   | 18  | 16235 | 1305 | 5.535292 | 3.56E-05 |
| turquoise  | 4754  | REACTOME_ANTIGEN_PROCESSING_UBIQUITINATION_   | 74  | 190 | 16063 | 4169 | 1.518377 | 3.56E-05 |
| turquoise  | 8610  | GSE14000_TRANSLATED_RNA_VS_MRNA_4H_LPS_DC_    | 74  | 190 | 16063 | 4169 | 1.518377 | 3.56E-05 |
| turquoise  | 9121  | GSE17721_0.5H_VS_24H_PAM3CSK4_BMDM_DN         | 74  | 190 | 16063 | 4169 | 1.518377 | 3.56E-05 |
| turquoise  | 5073  | SENESE_HDAC3_TARGETS_UP                       | 155 | 456 | 15797 | 4169 | 1.325161 | 3.57E-05 |
| cyan       | 5139  | WATANABE_ULCERATIVE_COLITIS_WITH_CANCER_DN    | 3   | 14  | 16239 | 77   | 45.23098 | 3.58E-05 |
| red        | 10286 | GSE9988_LOW_LPS_VS_ANTI_TREM1_AND_LPS_MONO    | 18  | 187 | 16066 | 524  | 2.98561  | 3.59E-05 |
| blue       | 4416  | REACTOME_MRNA_PROCESSING                      | 49  | 154 | 16099 | 2978 | 1.736538 | 3.61E-05 |
| blue       | 2308  | MORF_FEN1                                     | 26  | 65  | 16188 | 2978 | 2.183076 | 3.62E-05 |
| cyan       | 8583  | GSE13485_DAY1_VS_DAY3_YF17D_VACCINE_PBMC_DI   | 7   | 194 | 16059 | 77   | 7.616214 | 3.68E-05 |
| cyan       | 9763  | GSE3337_CTRL_VS_16H_IFNG_IN_CD8POS_DC_DN      | 7   | 194 | 16059 | 77   | 7.616214 | 3.68E-05 |
| yellow     | 2645  | GNF2_GLTSCR2                                  | 11  | 31  | 16222 | 1426 | 4.044315 | 3.71E-05 |
| brown      | 10143 | GSE6269_E_COLI_VS_STREP_PNEUMO_INF_PBMC_DN    | 41  | 162 | 16091 | 2190 | 1.878271 | 3.71E-05 |
| brown      | 9837  | GSE360_L_DONOVANI_VS_B_MALAYI_LOW_DOSE_DC_    | 46  | 189 | 16064 | 2190 | 1.806282 | 3.73E-05 |
| magenta    | 5879  | RICKMAN_HEAD_AND_NECK_CANCER_A                | 6   | 61  | 16192 | 167  | 9.572789 | 3.74E-05 |
| blue       | 2362  | MORF_CDC10                                    | 46  | 142 | 16111 | 2978 | 1.767984 | 3.76E-05 |
| turquoise  | 2014  | CTTGTAT,MIR-381                               | 72  | 184 | 16069 | 4169 | 1.525514 | 3.77E-05 |
| turquoise  | 8461  | GSE11864_UNTREATED_VS_CSF1_IN_MAC_DN          | 72  | 184 | 16069 | 4169 | 1.525514 | 3.77E-05 |
| salmon     | 4917  | CASORELLI_APL_SECONDARY_VS_DE_NOVO_DN         | 3   | 9   | 16244 | 127  | 42.65879 | 3.78E-05 |
| greenyello | 1322  | RECEPTOR_ACTIVITY                             | 14  | 423 | 15830 | 150  | 3.586162 | 3.79E-05 |
| greenyello | 4366  | REACTOME_PEPTIDE_LIGAND_BINDING_RECEPTORS     | 7   | 100 | 16153 | 150  | 7.584733 | 3.87E-05 |
| brown      | 2619  | GNF2_CD1D                                     | 17  | 45  | 16208 | 2190 | 2.803663 | 3.88E-05 |
| pink       | 1502  | V\$GATA3_01                                   | 11  | 176 | 16077 | 228  | 4.455318 | 3.92E-05 |
| red        | 8012  | KOINUMA_TARGETS_OF_SMAD2_OR_SMAD3             | 46  | 768 | 15485 | 524  | 1.8578   | 3.95E-05 |
| magenta    | 3535  | MODULE_46                                     | 13  | 332 | 15921 | 167  | 3.810854 | 3.96E-05 |
| red        | 7654  | CAIRO_HEPATOBLASTOMA_DN                       | 19  | 206 | 16047 | 524  | 2.860807 | 3.97E-05 |
| blue       | 10041 | GSE3982_MAC_VS_NKCELL_DN                      | 53  | 171 | 16082 | 2978 | 1.691565 | 3.98E-05 |
| brown      | 8722  | GSE14769_UNSTIM_VS_120MIN_LPS_BMDM_UP         | 47  | 195 | 16058 | 2190 | 1.788762 | 4.01E-05 |
| turquoise  | 2121  | AGTCTTA,MIR-499                               | 33  | 68  | 16185 | 4169 | 1.891937 | 4.01E-05 |
| lightcyan  | 6689  | BROWNE_HCMV_INFECTION_12HR_UP                 | 5   | 101 | 16152 | 62   | 12.97748 | 4.10E-05 |
| turquoise  | 9695  | GSE29618_PRE_VS_DAY7_POST_LAIV_FLU_VACCINE_P  | 76  | 197 | 16056 | 4169 | 1.504004 | 4.11E-05 |
| cyan       | 9511  | GSE2706_R848_VS_LPS_2H_STIM_DC_DN             | 6   | 134 | 16119 | 77   | 9.45125  | 4.12E-05 |
| greenyello | 8129  | BOSCO_TH1_CYTOTOXIC_MODULE                    | 7   | 101 | 16152 | 150  | 7.509637 | 4.13E-05 |
| brown      | 6304  | LENAOUR_DENDRITIC_CELL_MATURATION_DN          | 34  | 126 | 16127 | 2190 | 2.002617 | 4.16E-05 |
| cyan       | 6815  | MONNIER_POSTRADIATION_TUMOR_ESCAPE_DN         | 9   | 352 | 15901 | 77   | 5.396879 | 4.18E-05 |
| blue       | 8432  | GSE10325_LUPUS_BCELL_VS_LUPUS_MYELOID_UP      | 57  | 188 | 16065 | 2978 | 1.654725 | 4.18E-05 |
| brown      | 3010  | BIOCARTA_INTEGRIN_PATHWAY                     | 15  | 37  | 16216 | 2190 | 3.0087   | 4.19E-05 |
| brown      | 4671  | REACTOME_IL_2_SIGNALING                       | 15  | 37  | 16216 | 2190 | 3.0087   | 4.19E-05 |
| turquoise  | 2420  | MORF_MBD4                                     | 39  | 85  | 16168 | 4169 | 1.78874  | 4.21E-05 |
| yellow     | 8773  | GSE15750_DAY6_VS_DAY10_TRAF6KO_EFF_CD8_TCELLI | 34  | 189 | 16064 | 1426 | 2.050365 | 4.23E-05 |
| purple     | 8162  | LIM_MAMMARY_STEM_CELL_UP                      | 14  | 408 | 15845 | 157  | 3.552236 | 4.24E-05 |
| turquoise  | 9706  | GSE29618_LAIV_VS_TIV_FLU_VACCINE_DAY7_PDC_UP  | 75  | 194 | 16059 | 4169 | 1.507166 | 4.24E-05 |
| lightcyan  | 9797  | GSE360_CTRL_VS_T_GONDII_DC_DN                 | 6   | 168 | 16085 | 62   | 9.362327 | 4.25E-05 |
| lightcyan  | 9850  | GSE360_T_GONDII_VS_B_MALAYI_LOW_DOSE_DC_UP    | 6   | 168 | 16085 | 62   | 9.362327 | 4.25E-05 |
| greenyello | 8525  | GSE13229_IMM_VS_MATURE_NKCELL_DN              | 9   | 179 | 16074 | 150  | 5.447933 | 4.27E-05 |
| turquoise  | 2435  | MORF_PPP1CA                                   | 67  | 169 | 16084 | 4169 | 1.545574 | 4.28E-05 |
| brown      | 9420  | GSE24142_EARLY_THYMIC_PROGENITOR_VS_DN2_THY   | 46  | 190 | 16063 | 2190 | 1.796775 | 4.28E-05 |
| turquoise  | 8346  | STK33_NOMO_UP                                 | 99  | 271 | 15982 | 4169 | 1.424189 | 4.29E-05 |
| salmon     | 4702  | REACTOME_HOST_INTERACTIONS_OF_HIV_FACTORS     | 7   | 120 | 16133 | 127  | 7.465289 | 4.31E-05 |
| salmon     | 183   | MACROMOLECULAR_COMPLEX                        | 19  | 868 | 15385 | 127  | 2.801326 | 4.34E-05 |
| yellow     | 3343  | chr11q13                                      | 38  | 221 | 16032 | 1426 | 1.959771 | 4.35E-05 |
| salmon     | 6399  | TAKAO_RESPONSE_TO_UVB_RADIATION_UP            | 6   | 82  | 16171 | 127  | 9.364125 | 4.36E-05 |
| lightcyan  | 10245 | GSE9037_CTRL_VS_LPS_1H_STIM_IRAK4_KO_BMDM_L   | 6   | 169 | 16084 | 62   | 9.306929 | 4.39E-05 |
| brown      | 7454  | MILI_PSEUDOPODIA_CHEMOTAXIS_DN                | 90  | 446 | 15807 | 2190 | 1.497604 | 4.42E-05 |
| blue       | 1004  | REGULATION_OF_TRANSCRIPTION                   | 127 | 501 | 15752 | 2978 | 1.383486 | 4.47E-05 |
| turquoise  | 4371  | REACTOME_CELL_CYCLE_MITOTIC                   | 109 | 304 | 15949 | 4169 | 1.397831 | 4.50E-05 |
| magenta    | 5016  | TAKEDA_TARGETS_OF_NUP98_HOXA9_FUSION_16D_L    | 9   | 162 | 16091 | 167  | 5.406853 | 4.54E-05 |
| pink       | 4544  | REACTOME_AMINE_COMPOUND_SLC_TRANSPORTERS      | 4   | 15  | 16238 | 228  | 19.00936 | 4.56E-05 |
| lightgreen | 10077 | GSE3982_BASOPHIL_VS_NKCELL_DN                 | 5   | 154 | 16099 | 42   | 12.56416 | 4.59E-05 |
| blue       | 1093  | RNA_HELICASE_ACTIVITY                         | 13  | 23  | 16230 | 2978 | 3.084781 | 4.63E-05 |



|            |                                                   |     |      |       |      |          |          |
|------------|---------------------------------------------------|-----|------|-------|------|----------|----------|
| turquoise  | 9107 GSE17721_0.5H_VS_8H_POLYIC_BMDM_DN           | 72  | 185  | 16068 | 4169 | 1.517268 | 4.64E-05 |
| salmon     | 779 PROTEIN_METABOLIC_PROCESS                     | 22  | 1111 | 15142 | 127  | 2.534186 | 4.64E-05 |
| salmon     | 5909 BENPORATH_MYC_TARGETS_WITH_EBOX              | 9   | 214  | 16039 | 127  | 5.382184 | 4.65E-05 |
| turquoise  | 5794 FERREIRA_EWINGS_SARCOMA_UNSTABLE_VS_STABLE_  | 63  | 157  | 16096 | 4169 | 1.564381 | 4.66E-05 |
| lightcyan  | 8197 EGFR_UP.V1_DN                                | 6   | 171  | 16082 | 62   | 9.198076 | 4.69E-05 |
| lightcyan  | 9847 GSE360_L_MAJOR_VS_M_TUBERCULOSIS_DC_DN       | 6   | 171  | 16082 | 62   | 9.198076 | 4.69E-05 |
| lightcyan  | 7978 AZARE_NEOPLASTIC_TRANSFORMATION_BY_STAT3_DN  | 5   | 104  | 16149 | 62   | 12.60313 | 4.72E-05 |
| black      | 7840 MARTENS_TRETINOIN_RESPONSE_DN                | 30  | 786  | 15467 | 283  | 2.192027 | 4.73E-05 |
| red        | 9408 GSE24142_EARLY_THYMIC_PROGENITOR_VS_DN2_THY  | 18  | 191  | 16062 | 524  | 2.923085 | 4.75E-05 |
| purple     | 6219 COLLER_MYC_TARGETS_DN                        | 3   | 8    | 16245 | 157  | 38.82086 | 4.78E-05 |
| salmon     | 2301 MORF_CTBP1                                   | 8   | 166  | 16087 | 127  | 6.167536 | 4.78E-05 |
| magenta    | 118 INTEGRAL_TO_MEMBRANE                          | 25  | 1025 | 15228 | 167  | 2.37374  | 4.79E-05 |
| yellow     | 3602 MODULE_114                                   | 51  | 330  | 15923 | 1426 | 1.76145  | 4.80E-05 |
| magenta    | 3652 MODULE_169                                   | 7   | 93   | 16160 | 167  | 7.325414 | 4.81E-05 |
| turquoise  | 2243 GTGACGY_V\$E4F1_Q6                           | 194 | 592  | 15661 | 4169 | 1.277561 | 4.82E-05 |
| turquoise  | 2489 GCM_ERBB2IP                                  | 31  | 63   | 16190 | 4169 | 1.918328 | 4.86E-05 |
| blue       | 1116 ATP_DEPENDENT_HELICASE_ACTIVITY              | 14  | 26   | 16227 | 2978 | 2.938756 | 4.88E-05 |
| cyan       | 5966 ZHANG_RESPONSE_TO_IKK_INHIBITOR_AND_TNF_UP   | 7   | 203  | 16050 | 77   | 7.278549 | 4.91E-05 |
| purple     | 8055 PEDERSEN_METASTASIS_BY_ERBB2_ISOFORM_7       | 13  | 361  | 15892 | 157  | 3.72795  | 4.92E-05 |
| purple     | 227 PLASMA_MEMBRANE                               | 25  | 1095 | 15158 | 157  | 2.363523 | 4.93E-05 |
| blue       | 7608 FONTAINE_FOLLICULAR_THYROID_ADENOMA_UP       | 26  | 66   | 16187 | 2978 | 2.149999 | 4.93E-05 |
| purple     | 9640 GSE29615_CTRL_VS_DAY7_LAIV_FLU_VACCINE_PBMC_ | 8   | 135  | 16118 | 157  | 6.134654 | 4.98E-05 |
| magenta    | 3563 MODULE_75                                    | 13  | 340  | 15913 | 167  | 3.721187 | 5.06E-05 |
| turquoise  | 6207 FLECHNER_BIOPSY_KIDNEY_TRANSPLANT_REJECTED_V | 163 | 486  | 15767 | 4169 | 1.307534 | 5.06E-05 |
| red        | 9982 GSE3982_EOSINOPHIL_VS_EFF_MEMORY_CD4_TCELL_  | 18  | 192  | 16061 | 524  | 2.90786  | 5.09E-05 |
| blue       | 3621 MODULE_133                                   | 10  | 15   | 16238 | 2978 | 3.63846  | 5.12E-05 |
| turquoise  | 2177 TAATAAT,MIR-126                              | 68  | 173  | 16080 | 4169 | 1.532373 | 5.18E-05 |
| magenta    | 136 INTEGRAL_TO_PLASMA_MEMBRANE                   | 20  | 721  | 15532 | 167  | 2.699677 | 5.18E-05 |
| turquoise  | 9562 GSE27786_BCELL_VS_CD4_TCELL_UP               | 75  | 195  | 16058 | 4169 | 1.499437 | 5.18E-05 |
| lightcyan  | 6104 LEE_LIVER_CANCER_MYC_TGFA_UP                 | 4   | 54   | 16199 | 62   | 19.41816 | 5.26E-05 |
| lightcyan  | 6136 LEE_LIVER_CANCER_ACOX1_UP                    | 4   | 54   | 16199 | 62   | 19.41816 | 5.26E-05 |
| turquoise  | 2321 MORF_PSMC2                                   | 49  | 115  | 16138 | 4169 | 1.661116 | 5.30E-05 |
| lightcyan  | 8988 GSE17721_LPS_VS_PAM3CSK4_2H_BMDM_UP          | 6   | 175  | 16078 | 62   | 8.987834 | 5.33E-05 |
| lightgreen | 9477 GSE26495_PD1HIGH_VS_PD1LOW_CD8_TCELL_DN      | 5   | 159  | 16094 | 42   | 12.16906 | 5.34E-05 |
| turquoise  | 9155 GSE17974_0H_VS_2H_IN_VITRO_ACT_CD4_TCELL_DN  | 74  | 192  | 16061 | 4169 | 1.502561 | 5.35E-05 |
| turquoise  | 9317 GSE22886_NAIVE_VS_MEMORY_TCELL_DN            | 74  | 192  | 16061 | 4169 | 1.502561 | 5.35E-05 |
| magenta    | 3929 PID_BCR_5PATHWAY                             | 6   | 65   | 16188 | 167  | 8.983694 | 5.38E-05 |
| blue       | 9391 GSE22886_NAIVE_CD4_TCELL_VS_12H_ACT_TH1_DN   | 59  | 198  | 16055 | 2978 | 1.626281 | 5.39E-05 |
| lightgreen | 225 PLASMA_MEMBRANE_PART                          | 10  | 867  | 15386 | 42   | 4.463393 | 5.47E-05 |
| purple     | 5072 SENESE_HDAC2_TARGETS_DN                      | 7   | 101  | 16152 | 157  | 7.174812 | 5.52E-05 |
| brown      | 8460 GSE11864_UNTREATED_VS_CSF1_IN_MAC_UP         | 44  | 181  | 16072 | 2190 | 1.804112 | 5.61E-05 |
| brown      | 8666 GSE1432_1H_VS_24H_IFNG_MICROGLIA_UP          | 46  | 192  | 16061 | 2190 | 1.778058 | 5.64E-05 |
| lightgreen | 10037 GSE3982_MAC_VS_EFF_MEMORY_CD4_TCELL_DN      | 5   | 161  | 16092 | 42   | 12.01789 | 5.67E-05 |
| greenyello | 4383 REACTOME_CHEMOKINE_RECEPTORS_BIND_CHEMOKI    | 5   | 45   | 16208 | 150  | 12.03926 | 5.68E-05 |
| lightcyan  | 8695 GSE1460_DP_VS_CD4_THYMOCYTE_DN               | 6   | 177  | 16076 | 62   | 8.886277 | 5.68E-05 |
| lightcyan  | 9499 GSE2706_UNSTIM_VS_2H_R848_DC_DN              | 6   | 177  | 16076 | 62   | 8.886277 | 5.68E-05 |
| turquoise  | 8634 GSE14308_TH2_VS_INDUCED_TREG_UP              | 72  | 186  | 16067 | 4169 | 1.509111 | 5.69E-05 |
| cyan       | 1866 V\$IRF_Q6                                    | 7   | 208  | 16045 | 77   | 7.103584 | 5.73E-05 |
| purple     | 7988 LEE_BMP2_TARGETS_UP                          | 18  | 650  | 15603 | 157  | 2.866771 | 5.74E-05 |
| greenyello | 10132 GSE6269_HEALTHY_VS_STREP_PNEUMO_INF_PBMC_U  | 9   | 186  | 16067 | 150  | 5.242903 | 5.76E-05 |
| brown      | 6785 MARCHINI TRABECTEDIN_RESISTANCE_DN           | 16  | 42   | 16211 | 2190 | 2.827223 | 5.79E-05 |
| lightcyan  | 8855 GSE17721_CTRL_VS_POLYIC_4H_BMDM_DN           | 6   | 178  | 16075 | 62   | 8.836354 | 5.86E-05 |
| lightcyan  | 9090 GSE17721_LPS_VS_GARDIQUIMOD_24H_BMDM_UP      | 6   | 178  | 16075 | 62   | 8.836354 | 5.86E-05 |
| lightcyan  | 9795 GSE360_CTRL_VS_L_MAJOR_DC_DN                 | 6   | 178  | 16075 | 62   | 8.836354 | 5.86E-05 |
| red        | 2614 GNF2_CASP1                                   | 13  | 111  | 16142 | 524  | 3.632642 | 5.87E-05 |
| purple     | 2206 TTTNNANAGCYR_UNKNOWN                         | 7   | 102  | 16151 | 157  | 7.104471 | 5.88E-05 |
| red        | 5150 HAHTOLA_SEZARY_SYNDROM_UP                    | 12  | 96   | 16157 | 524  | 3.877147 | 5.92E-05 |
| cyan       | 3533 MODULE_44                                    | 8   | 285  | 15968 | 77   | 5.924994 | 5.98E-05 |
| purple     | 3496 MODULE_3                                     | 13  | 368  | 15885 | 157  | 3.657038 | 5.98E-05 |
| yellow     | 3193 chr22q13                                     | 30  | 161  | 16092 | 1426 | 2.123779 | 5.99E-05 |

|            |       |                                                |     |      |       |      |          |          |
|------------|-------|------------------------------------------------|-----|------|-------|------|----------|----------|
| brown      | 10286 | GSE9988_LOW_LPS_VS_ANTI_TREM1_AND_LPS_MONO     | 45  | 187  | 16066 | 2190 | 1.785913 | 6.03E-05 |
| purple     | 8586  | GSE13485_DAY1_VS_DAY21_YF17D_VACCINE_PBMC_U    | 9   | 179  | 16074 | 157  | 5.205031 | 6.10E-05 |
| blue       | 7092  | TOYOTA_TARGETS_OF_MIR34B_AND_MIR34C            | 114 | 444  | 15809 | 2978 | 1.401299 | 6.10E-05 |
| red        | 6482  | CUI_TCF21_TARGETS_2_DN                         | 45  | 759  | 15494 | 524  | 1.838963 | 6.11E-05 |
| lightgreen | 3341  | chr5q11                                        | 3   | 30   | 16223 | 42   | 38.69762 | 6.21E-05 |
| lightgreen | 3835  | MODULE_410                                     | 3   | 30   | 16223 | 42   | 38.69762 | 6.21E-05 |
| turquoise  | 3585  | MODULE_97                                      | 41  | 92   | 16161 | 4169 | 1.737391 | 6.22E-05 |
| blue       | 9488  | GSE26928_NAIVE_VS_CENT_MEMORY_CD4_TCELL_UP     | 55  | 182  | 16071 | 2978 | 1.649302 | 6.24E-05 |
| purple     | 7885  | FIGUEROA_AML_METHYLATION_CLUSTER_4_UP          | 7   | 103  | 16150 | 157  | 7.035496 | 6.26E-05 |
| cyan       | 1820  | V\$ICSBP_Q6                                    | 7   | 211  | 16042 | 77   | 7.002585 | 6.27E-05 |
| blue       | 5143  | RODRIGUES_THYROID_CARCINOMA_POORLY_DIFFEREI    | 178 | 746  | 15507 | 2978 | 1.302237 | 6.27E-05 |
| brown      | 4914  | DIAZ_CHRONIC_MEYLOGENOUS_LEUKEMIA_UP           | 234 | 1378 | 14875 | 2190 | 1.260248 | 6.27E-05 |
| salmon     | 2576  | GNF2_BUB3                                      | 4   | 28   | 16225 | 127  | 18.28234 | 6.29E-05 |
| blue       | 9442  | GSE24634_TREG_VS_TCONV_POST_DAY5_IL4_CONVER    | 59  | 199  | 16054 | 2978 | 1.618109 | 6.31E-05 |
| turquoise  | 9934  | GSE37416_0H_VS_3H_F_TULARENSIS_LVS_NEUTROPH    | 75  | 196  | 16057 | 4169 | 1.491787 | 6.31E-05 |
| turquoise  | 6865  | MARSON_BOUND_BY_E2F4_UNSTIMULATED              | 224 | 699  | 15554 | 4169 | 1.249317 | 6.39E-05 |
| salmon     | 8949  | GSE17721_PAM3CSK4_VS_CPG_0.5H_BMDM_DN          | 8   | 173  | 16080 | 127  | 5.917983 | 6.41E-05 |
| brown      | 2849  | KEGG_FC_GAMMA_R_MEDIATED_PHAGOCYTOSIS          | 27  | 93   | 16160 | 2190 | 2.154618 | 6.42E-05 |
| brown      | 7301  | CHAUHAN_RESPONSE_TO_METHOXYESTRADIOL_DN        | 28  | 98   | 16155 | 2190 | 2.120417 | 6.48E-05 |
| lightgreen | 3160  | chr6p11                                        | 2   | 5    | 16248 | 42   | 154.7905 | 6.49E-05 |
| greenyello | 9319  | GSE22886_NAIVE_CD8_TCELL_VS_NKCELL_DN          | 9   | 189  | 16064 | 150  | 5.159683 | 6.52E-05 |
| lightcyan  | 9478  | GSE26669_CTRL_VS_COSTIM_BLOCK_MLR_CD4_TCELL    | 6   | 182  | 16071 | 62   | 8.642148 | 6.63E-05 |
| turquoise  | 61    | NUCLEAR_PART                                   | 183 | 557  | 15696 | 4169 | 1.280848 | 6.68E-05 |
| cyan       | 6686  | ZHU_CMV_24_HR_UP                               | 5   | 90   | 16163 | 77   | 11.72655 | 6.72E-05 |
| lightgreen | 10025 | GSE3982_DC_VS_NKCELL_DN                        | 5   | 167  | 16086 | 42   | 11.58611 | 6.75E-05 |
| lightcyan  | 9402  | GSE24026_PD1_LIGATION_VS_CTRL_IN_ACT_TCELL_LIN | 6   | 183  | 16070 | 62   | 8.594923 | 6.84E-05 |
| brown      | 8702  | GSE1460_CD4_THYMOCYTE_VS_NAIVE_CD4_TCELL_CC    | 47  | 199  | 16054 | 2190 | 1.752807 | 6.86E-05 |
| red        | 2682  | GNF2_PECAM1                                    | 9   | 56   | 16197 | 524  | 4.984903 | 6.90E-05 |
| brown      | 8664  | GSE1432_1H_VS_6H_IFNG_MICROGLIA_UP             | 45  | 188  | 16065 | 2190 | 1.776414 | 6.91E-05 |
| lightgreen | 10176 | GSE7460_FOXP3_MUT_VS_HET_ACT_TCONV_UP          | 5   | 168  | 16085 | 42   | 11.51715 | 6.94E-05 |
| yellow     | 7740  | YAO_TEMPORAL_RESPONSE_TO_PROGESTERONE_CLU:     | 31  | 170  | 16083 | 1426 | 2.078389 | 6.96E-05 |
| purple     | 4868  | DAVICIONI_TARGETS_OF_PAX_FOXO1_FUSIONS_UP      | 10  | 226  | 16027 | 157  | 4.580632 | 6.98E-05 |
| pink       | 3544  | MODULE_55                                      | 22  | 624  | 15629 | 228  | 2.513256 | 6.99E-05 |
| greenyello | 7017  | WORSCHER_TUMOR_REJECTION_UP                    | 5   | 47   | 16206 | 150  | 11.52695 | 7.03E-05 |
| lightcyan  | 8093  | KRIEG_KDM3A_TARGETS_NOT_HYPOXIA                | 6   | 184  | 16069 | 62   | 8.548212 | 7.05E-05 |
| blue       | 2437  | MORF_PPP2CA                                    | 41  | 125  | 16128 | 2978 | 1.790122 | 7.07E-05 |
| purple     | 7891  | FIGUEROA_AML_METHYLATION_CLUSTER_7_UP          | 7   | 105  | 16148 | 157  | 6.901486 | 7.08E-05 |
| lightgreen | 3553  | MODULE_64                                      | 7   | 404  | 15849 | 42   | 6.705033 | 7.08E-05 |
| purple     | 3915  | MODULE_557                                     | 3   | 9    | 16244 | 157  | 34.50743 | 7.12E-05 |
| salmon     | 10090 | GSE3982_CENT_MEMORY_CD4_TCELL_VS_NKCELL_UP     | 8   | 176  | 16077 | 127  | 5.817108 | 7.23E-05 |
| purple     | 8369  | KRAS.600.LUNG.BREAST_UP.V1_UP                  | 9   | 183  | 16070 | 157  | 5.09126  | 7.23E-05 |
| turquoise  | 7098  | BERNARD_PPAPDC1B_TARGETS_UP                    | 22  | 40   | 16213 | 4169 | 2.144195 | 7.24E-05 |
| lightcyan  | 9505  | GSE2706_UNSTIM_VS_8H_LPS_DC_DN                 | 6   | 185  | 16068 | 62   | 8.502005 | 7.26E-05 |
| turquoise  | 3317  | chr13q21                                       | 7   | 7    | 16246 | 4169 | 3.898537 | 7.28E-05 |
| brown      | 3958  | PID_MET_PATHWAY                                | 24  | 79   | 16174 | 2190 | 2.254621 | 7.29E-05 |
| brown      | 2695  | GNF2_SELL                                      | 17  | 47   | 16206 | 2190 | 2.684358 | 7.38E-05 |
| lightgreen | 7066  | SMID_BREAST_CANCER_NORMAL_LIKE_UP              | 7   | 407  | 15846 | 42   | 6.65561  | 7.42E-05 |
| lightcyan  | 5195  | CASTELLANO_NRAS_TARGETS_UP                     | 4   | 59   | 16194 | 62   | 17.77255 | 7.47E-05 |
| lightcyan  | 8629  | GSE14308_TH2_VS_TH1_DN                         | 6   | 186  | 16067 | 62   | 8.456296 | 7.48E-05 |
| lightcyan  | 9930  | GSE37416_CTRL_VS_24H_F_TULARENSIS_LVS_NEUTRO   | 6   | 186  | 16067 | 62   | 8.456296 | 7.48E-05 |
| magenta    | 3553  | MODULE_64                                      | 14  | 404  | 15849 | 167  | 3.372591 | 7.50E-05 |
| lightgreen | 136   | INTEGRAL_TO_PLASMA_MEMBRANE                    | 9   | 721  | 15532 | 42   | 4.830493 | 7.56E-05 |
| magenta    | 2851  | KEGG_INTESTINAL_IMMUNE_NETWORK_FOR_IGA_PRC     | 5   | 43   | 16210 | 167  | 11.31667 | 7.57E-05 |
| blue       | 10060 | GSE3982_BCELL_VS_BASOPHIL_UP                   | 54  | 179  | 16074 | 2978 | 1.646454 | 7.62E-05 |
| midnightb  | 4323  | REACTOME_GENERIC_TRANSCRIPTION_PATHWAY         | 8   | 321  | 15932 | 71   | 5.705059 | 7.66E-05 |
| green      | 2627  | GNF2_CDH3                                      | 7   | 15   | 16238 | 1305 | 5.812056 | 7.66E-05 |
| turquoise  | 8777  | GSE15930_NAIVE_VS_24H_IN_VITRO_STIM_CD8_TCELI  | 75  | 197  | 16056 | 4169 | 1.484215 | 7.66E-05 |
| blue       | 8452  | GSE11057_CD4_EFF_MEM_VS_PBMC_UP                | 58  | 196  | 16057 | 2978 | 1.615031 | 7.69E-05 |
| magenta    | 7265  | BOYLAN_MULTIPLE_MYELOMA_C_D_UP                 | 8   | 135  | 16118 | 167  | 5.76731  | 7.70E-05 |
| lightcyan  | 4959  | NOJIMA_SFRP2_TARGETS_DN                        | 3   | 22   | 16231 | 62   | 35.74707 | 7.73E-05 |

|            |       |                                                  |     |     |       |      |          |          |
|------------|-------|--------------------------------------------------|-----|-----|-------|------|----------|----------|
| lightcyan  | 5629  | YAN_ESCAPE_FROM_ANOIKIS                          | 3   | 22  | 16231 | 62   | 35.74707 | 7.73E-05 |
| lightcyan  | 7693  | DORN_ADENOVIRUS_INFECTION_12HR_UP                | 3   | 22  | 16231 | 62   | 35.74707 | 7.73E-05 |
| turquoise  | 1946  | TGCTGCT,MIR-15A,MIR-16,MIR-15B,MIR-195,MIR-424,I | 171 | 517 | 15736 | 4169 | 1.289458 | 7.73E-05 |
| lightgreen | 10257 | GSE9650_NAIVE_VS_EXHAUSTED_CD8_TCELL_DN          | 5   | 172 | 16081 | 42   | 11.24931 | 7.76E-05 |
| greenyello | 7282  | VILIMAS_NOTCH1_TARGETS_UP                        | 5   | 48  | 16205 | 150  | 11.28681 | 7.79E-05 |
| brown      | 6241  | NADLER_OBESITY_UP                                | 19  | 56  | 16197 | 2190 | 2.517996 | 7.79E-05 |
| salmon     | 2612  | GNF2_APEX1                                       | 6   | 91  | 16162 | 127  | 8.438003 | 7.83E-05 |
| purple     | 4830  | BERTUCCI_MEDULLARY_VS_DUCTAL_BREAST_CANCER_      | 8   | 144 | 16109 | 157  | 5.751238 | 7.86E-05 |
| turquoise  | 2548  | GCM_RAB10                                        | 68  | 175 | 16078 | 4169 | 1.51486  | 7.86E-05 |
| yellow     | 5493  | LUI_THYROID_CANCER_CLUSTER_3                     | 10  | 28  | 16225 | 1426 | 4.070577 | 7.87E-05 |
| brown      | 9410  | GSE24142_EARLY_THYMIC_PROGENITOR_VS_DN3_THY      | 45  | 189 | 16064 | 2190 | 1.767015 | 7.91E-05 |
| blue       | 7285  | SPIRA_SMOKERS_LUNG_CANCER_DN                     | 12  | 21  | 16232 | 2978 | 3.11868  | 7.92E-05 |
| cyan       | 7791  | NIELSEN_SYNOVIAL_SARCOMA_DN                      | 3   | 18  | 16235 | 77   | 35.17965 | 7.93E-05 |
| turquoise  | 8814  | GSE16522_MEMORY_VS_NAIVE_CD8_TCELL_UP            | 74  | 194 | 16059 | 4169 | 1.487071 | 7.93E-05 |
| turquoise  | 9206  | GSE17974_1H_VS_72H_UNTREATED_IN_VITRO_CD4_T      | 74  | 194 | 16059 | 4169 | 1.487071 | 7.93E-05 |
| turquoise  | 9928  | GSE37416_CTRL_VS_12H_F_TULARENSIS_LVS_NEUTRO     | 74  | 194 | 16059 | 4169 | 1.487071 | 7.93E-05 |
| salmon     | 5175  | ENK_UV_RESPONSE KERATINOCYTE_UP                  | 13  | 470 | 15783 | 127  | 3.539772 | 7.95E-05 |
| red        | 2666  | GNF2_MCL1                                        | 9   | 57  | 16196 | 524  | 4.897449 | 7.96E-05 |
| blue       | 9661  | GSE29618_MONOCYTE_VS_PDC_DN                      | 57  | 192 | 16061 | 2978 | 1.620252 | 8.00E-05 |
| cyan       | 3498  | MODULE_5                                         | 9   | 383 | 15870 | 77   | 4.960056 | 8.00E-05 |
| magenta    | 225   | PLASMA_MEMBRANE_PART                             | 22  | 867 | 15386 | 167  | 2.469566 | 8.04E-05 |
| turquoise  | 1803  | V\$NRF1_Q6                                       | 88  | 239 | 16014 | 4169 | 1.435445 | 8.05E-05 |
| red        | 9361  | GSE22886_NAIVE_TCELL_VS_DC_DN                    | 18  | 199 | 16054 | 524  | 2.805574 | 8.12E-05 |
| lightcyan  | 9131  | GSE17721_0.5H_VS_8H_CPG_BMDM_DN                  | 6   | 189 | 16064 | 62   | 8.322069 | 8.18E-05 |
| blue       | 2380  | MORF_EI24                                        | 45  | 142 | 16111 | 2978 | 1.72955  | 8.21E-05 |
| greenyello | 8401  | GOLDRATH_NAIVE_VS_MEMORY_CD8_TCELL_DN            | 9   | 195 | 16058 | 150  | 5.000923 | 8.29E-05 |
| lightgreen | 2689  | GNF2_RAB7L1                                      | 3   | 33  | 16220 | 42   | 35.17965 | 8.29E-05 |
| turquoise  | 2692  | GNF2_RBBP6                                       | 33  | 70  | 16183 | 4169 | 1.837882 | 8.31E-05 |
| salmon     | 5602  | DIRMEIER_LMP1_RESPONSE_LATE_DN                   | 4   | 30  | 16223 | 127  | 17.06352 | 8.32E-05 |
| red        | 2619  | GNF2_CD1D                                        | 8   | 45  | 16208 | 524  | 5.514165 | 8.33E-05 |
| blue       | 4377  | REACTOME_CYTOSOLIC_TRNA_AMINOACYLATION           | 13  | 24  | 16229 | 2978 | 2.956249 | 8.41E-05 |
| brown      | 2661  | GNF2_LYN                                         | 12  | 27  | 16226 | 2190 | 3.298427 | 8.46E-05 |
| salmon     | 2324  | MORF_RAD21                                       | 8   | 180 | 16073 | 127  | 5.687839 | 8.46E-05 |
| salmon     | 10117 | GSE39820_TGFBETA3_IL6_VS_TGFBETA3_IL6_IL23A_TF   | 8   | 180 | 16073 | 127  | 5.687839 | 8.46E-05 |
| turquoise  | 4888  | WILCOX_PRESPONSE_TO_ROGESTERONE_UP               | 55  | 135 | 16118 | 4169 | 1.588293 | 8.49E-05 |
| purple     | 6936  | HELLER_HDAC_TARGETS_SILENCED_BY_METHYLATION_     | 13  | 381 | 15872 | 157  | 3.532257 | 8.50E-05 |
| lightgreen | 1324  | TRANSMEMBRANE_RECEPTOR_ACTIVITY                  | 6   | 285 | 15968 | 42   | 8.146867 | 8.51E-05 |
| magenta    | 7662  | GUTIERREZ_WALDENSTROEMS_MACROGLOBULINEMIA        | 3   | 9   | 16244 | 167  | 32.44112 | 8.55E-05 |
| red        | 10032 | GSE3982_MAC_VS_BCELL_UP                          | 17  | 182 | 16071 | 524  | 2.897209 | 8.56E-05 |
| red        | 5394  | PEREZ_TP63_TARGETS                               | 23  | 294 | 15959 | 524  | 2.426514 | 8.57E-05 |
| lightgreen | 14    | INTRINSIC_TO_PLASMA_MEMBRANE                     | 9   | 733 | 15520 | 42   | 4.751413 | 8.58E-05 |
| brown      | 4610  | REACTOME_IL_3_5_AND_GM_CSF_SIGNALING             | 15  | 39  | 16214 | 2190 | 2.854408 | 8.63E-05 |
| lightcyan  | 6388  | KUMAR_TARGETS_OF_MLL_AF9_FUSION                  | 8   | 376 | 15877 | 62   | 5.577557 | 8.65E-05 |
| red        | 7855  | VERHAAK_GLIOMASTOMA_NEURAL                       | 18  | 200 | 16053 | 524  | 2.791546 | 8.66E-05 |
| lightcyan  | 8342  | HOXA9_DN.V1_UP                                   | 6   | 191 | 16062 | 62   | 8.234927 | 8.67E-05 |
| red        | 2699  | GNF2_SPI1                                        | 7   | 34  | 16219 | 524  | 6.385889 | 8.78E-05 |
| salmon     | 8460  | GSE11864_UNTREATED_VS_CSF1_IN_MAC_UP             | 8   | 181 | 16072 | 127  | 5.656414 | 8.80E-05 |
| blue       | 8482  | GSE11924_TFH_VS_TH2_CD4_TCELL_UP                 | 58  | 197 | 16056 | 2978 | 1.606833 | 8.98E-05 |
| lightcyan  | 5709  | FURUKAWA_DUSP6_TARGETS_PCI35_UP                  | 4   | 62  | 16191 | 62   | 16.91259 | 9.07E-05 |
| brown      | 6584  | BURTON_ADIPOGENESIS_8                            | 24  | 80  | 16173 | 2190 | 2.226438 | 9.10E-05 |
| turquoise  | 3178  | chr5q21                                          | 14  | 21  | 16232 | 4169 | 2.599025 | 9.13E-05 |
| lightcyan  | 8495  | GSE12366_GC_VS_NAIVE_BCELL_DN                    | 6   | 193 | 16060 | 62   | 8.149591 | 9.18E-05 |
| red        | 8186  | ZWANG_CLASS_3_TRANSIENTLY_INDUCED_BY_EGF         | 18  | 201 | 16052 | 524  | 2.777658 | 9.23E-05 |
| turquoise  | 2201  | TMTGCGGANR_UNKNOWN                               | 62  | 157 | 16096 | 4169 | 1.53955  | 9.26E-05 |
| brown      | 4693  | REACTOME_HEMOSTASIS                              | 80  | 394 | 15859 | 2190 | 1.506896 | 9.26E-05 |
| turquoise  | 8779  | GSE15930_NAIVE_VS_24H_IN_VITRO_STIM_IL12_CD8_    | 75  | 198 | 16055 | 4169 | 1.476718 | 9.28E-05 |
| purple     | 225   | PLASMA_MEMBRANE_PART                             | 21  | 867 | 15386 | 157  | 2.50746  | 9.29E-05 |
| greenyello | 9321  | GSE22886_NAIVE_CD4_TCELL_VS_NKCELL_DN            | 9   | 198 | 16055 | 150  | 4.925152 | 9.32E-05 |
| brown      | 6135  | FLECHNER_BIOPSY_KIDNEY_TRANSPLANT_REJECTED_V     | 25  | 85  | 16168 | 2190 | 2.182783 | 9.37E-05 |
| turquoise  | 2197  | TGCGCANK_UNKNOWN                                 | 167 | 505 | 15748 | 4169 | 1.289219 | 9.43E-05 |

|            |       |                                               |     |      |       |      |          |          |
|------------|-------|-----------------------------------------------|-----|------|-------|------|----------|----------|
| lightgreen | 1322  | RECEPTOR_ACTIVITY                             | 7   | 423  | 15830 | 42   | 6.403861 | 9.45E-05 |
| blue       | 5920  | BENPORATH_ES_CORE_NINE_CORRELATED             | 31  | 87   | 16166 | 2978 | 1.944694 | 9.47E-05 |
| turquoise  | 2283  | GGGCGGR_V\$SP1_Q6                             | 759 | 2655 | 13598 | 4169 | 1.114497 | 9.52E-05 |
| lightgreen | 3652  | MODULE_169                                    | 4   | 93   | 16160 | 42   | 16.64414 | 9.52E-05 |
| turquoise  | 5269  | BERENJENO_TRANSFORMED_BY_RHOA_UP              | 169 | 512  | 15741 | 4169 | 1.286822 | 9.57E-05 |
| blue       | 2315  | MORF_MSH2                                     | 24  | 61   | 16192 | 2978 | 2.147288 | 9.74E-05 |
| blue       | 2668  | GNF2_MCM5                                     | 24  | 61   | 16192 | 2978 | 2.147288 | 9.74E-05 |
| red        | 9005  | GSE17721_POLYIC_VS_CPG_1H_BMDM_DN             | 17  | 184  | 16069 | 524  | 2.865717 | 9.80E-05 |
| magenta    | 10060 | GSE3982_BCELL_VS_BASOPHIL_UP                  | 9   | 179  | 16074 | 167  | 4.893353 | 9.82E-05 |
| cyan       | 6128  | RADAEVA_RESPONSE_TO_IFNA1_UP                  | 4   | 51   | 16202 | 77   | 16.55513 | 9.83E-05 |
| red        | 7351  | RUTELLA_RESPONSE_TO_HGF_VS_CSF2RB_AND_IL4_U   | 28  | 398  | 15855 | 524  | 2.182113 | 9.83E-05 |
| blue       | 3678  | MODULE_198                                    | 78  | 285  | 15968 | 2978 | 1.493684 | 9.86E-05 |
| blue       | 6148  | MANALO_HYPOXIA_DN                             | 78  | 285  | 15968 | 2978 | 1.493684 | 9.86E-05 |
| lightgreen | 10091 | GSE3982_CENT_MEMORY_CD4_TCELL_VS_NKCELL_DN    | 5   | 181  | 16072 | 42   | 10.68995 | 9.87E-05 |
| red        | 5850  | RICKMAN_TUMOR_DIFFERENTIATED_WELL_VS_MODEI    | 10  | 72   | 16181 | 524  | 4.307941 | 9.91E-05 |
| yellow     | 8514  | GSE12845_IGD_NEG_BLOOD_VS_PRE_GC_TONSIL_BCE   | 33  | 189  | 16064 | 1426 | 1.99006  | 9.96E-05 |
| grey60     | 9988  | GSE3982_EOSINOPHIL_VS_TH1_UP                  | 5   | 173  | 16080 | 44   | 10.67591 | 0.0001   |
| turquoise  | 1964  | AATGTGA,MIR-23A,MIR-23B                       | 123 | 356  | 15897 | 4169 | 1.346966 | 0.000101 |
| magenta    | 5897  | PASQUALUCCI_LYMPHOMA_BY_GC_STAGE_UP           | 11  | 267  | 15986 | 167  | 4.009576 | 0.000101 |
| purple     | 1291  | COLLAGEN_BINDING                              | 3   | 10   | 16243 | 157  | 31.05669 | 0.000101 |
| purple     | 4362  | REACTOME_COMMON_PATHWAY                       | 3   | 10   | 16243 | 157  | 31.05669 | 0.000101 |
| turquoise  | 2168  | ATTACAT,MIR-380-3P                            | 37  | 82   | 16171 | 4169 | 1.759096 | 0.000101 |
| blue       | 886   | REGULATION_OF_NUCLEOBASENUCLEOSIDENUCLEOTIC   | 136 | 552  | 15701 | 2978 | 1.344648 | 0.000101 |
| magenta    | 6116  | TARTE_PLASMA_CELL_VS_PLASMABLAST_UP           | 12  | 315  | 15938 | 167  | 3.707556 | 0.000103 |
| red        | 7922  | PILON_KLF1_TARGETS_DN                         | 92  | 1952 | 14301 | 524  | 1.461875 | 0.000103 |
| blue       | 3187  | chr11q12                                      | 34  | 99   | 16154 | 2978 | 1.874358 | 0.000104 |
| yellow     | 4984  | GINESTIER_BREAST_CANCER_ZNF217_AMPLIFIED_DN   | 48  | 314  | 15939 | 1426 | 1.742311 | 0.000104 |
| brown      | 4763  | REACTOME_PLATELET_ACTIVATION_SIGNALING_AND_   | 43  | 180  | 16073 | 2190 | 1.772905 | 0.000104 |
| blue       | 2342  | MORF_UNG                                      | 28  | 76   | 16177 | 2978 | 2.010728 | 0.000104 |
| red        | 7266  | BOYLAN_MULTIPLE_MYELOMA_C_D_DN                | 20  | 240  | 16013 | 524  | 2.584765 | 0.000105 |
| red        | 8347  | STK33_SKM_DN                                  | 20  | 240  | 16013 | 524  | 2.584765 | 0.000105 |
| greenyello | 8162  | LIM_MAMMARY_STEM_CELL_UP                      | 13  | 408  | 15845 | 150  | 3.452435 | 0.000106 |
| green      | 9365  | GSE22886_NAIVE_BCELL_VS_NEUTROPHIL_DN         | 32  | 198  | 16055 | 1305 | 2.012833 | 0.000108 |
| brown      | 5217  | MARKEY_RB1_ACUTE_LOF_UP                       | 46  | 197  | 16056 | 2190 | 1.73293  | 0.000109 |
| brown      | 9453  | GSE24634_TEFF_VS_TCONV_DAY7_IN_CULTURE_DN     | 46  | 197  | 16056 | 2190 | 1.73293  | 0.000109 |
| lightcyan  | 709   | RESPONSE_TO_OTHER_ORGANISM                    | 4   | 65   | 16188 | 62   | 16.13201 | 0.000109 |
| magenta    | 9250  | GSE19825_NAIVE_VS_IL2RAHIGH_DAY3_EFF_CD8_TCEI | 8   | 142  | 16111 | 167  | 5.483006 | 0.00011  |
| yellow     | 8314  | RB_DN.V1_UP                                   | 25  | 128  | 16125 | 1426 | 2.226097 | 0.00011  |
| turquoise  | 2106  | AACTGAC,MIR-223                               | 40  | 91   | 16162 | 4169 | 1.713643 | 0.00011  |
| salmon     | 9829  | GSE360_DC_VS_MAC_M_TUBERCULOSIS_DN            | 8   | 187  | 16066 | 127  | 5.474925 | 0.00011  |
| brown      | 9778  | GSE339_CD8POS_VS_CD4CD8DN_DC_IN_CULTURE_UP    | 44  | 186  | 16067 | 2190 | 1.755614 | 0.000111 |
| cyan       | 6377  | BASSO_CD40_SIGNALING_UP                       | 5   | 100  | 16153 | 77   | 10.5539  | 0.000111 |
| brown      | 7134  | CHUNG_BLISTER_CYTOTOXICITY_DN                 | 16  | 44   | 16209 | 2190 | 2.698713 | 0.000111 |
| magenta    | 5588  | YORDY_RECIPROCAL_REGULATION_BY_ETS1_AND_SP1   | 6   | 74   | 16179 | 167  | 7.891083 | 0.000112 |
| turquoise  | 3665  | MODULE_182                                    | 41  | 94   | 16159 | 4169 | 1.700426 | 0.000112 |
| purple     | 2806  | KEGG_CYTOKINE_CYTOKINE_RECEPTOR_INTERACTION   | 9   | 194  | 16059 | 157  | 4.802581 | 0.000113 |
| purple     | 10022 | GSE3982_DC_VS_CENT_MEMORY_CD4_TCELL_UP        | 9   | 194  | 16059 | 157  | 4.802581 | 0.000113 |
| cyan       | 9199  | GSE17974_IL4_AND_ANTI_IL12_VS_UNTREATED_24H_  | 6   | 161  | 16092 | 77   | 7.866258 | 0.000114 |
| salmon     | 8432  | GSE10325_LUPUS_BCELL_VS_LUPUS_MYELOID_UP      | 8   | 188  | 16065 | 127  | 5.445803 | 0.000115 |
| magenta    | 6242  | SANSOM_APC_TARGETS_DN                         | 12  | 319  | 15934 | 167  | 3.661067 | 0.000115 |
| salmon     | 2381  | MORF_EIF3S2                                   | 9   | 241  | 16012 | 127  | 4.779201 | 0.000116 |
| magenta    | 8368  | KRAS.600.LUNG.BREAST_UP.V1_DN                 | 9   | 183  | 16070 | 167  | 4.786394 | 0.000116 |
| yellow     | 8310  | CRX_NRL_DN.V1_UP                              | 24  | 121  | 16132 | 1426 | 2.260684 | 0.000117 |
| purple     | 6934  | HELLER_HDAC_TARGETS_UP                        | 11  | 289  | 15964 | 157  | 3.940295 | 0.000117 |
| lightcyan  | 7415  | HAN_SATB1_TARGETS_DN                          | 8   | 393  | 15860 | 62   | 5.336288 | 0.000118 |
| turquoise  | 5743  | PUJANA_BRCA2_PCC_NETWORK                      | 141 | 418  | 15835 | 4169 | 1.315057 | 0.000118 |
| greenyello | 4831  | SCHUETZ_BREAST_CANCER_DUCTAL_INVASIVE_UP      | 11  | 303  | 15950 | 150  | 3.933619 | 0.000118 |
| turquoise  | 3412  | chr6q14                                       | 16  | 26   | 16227 | 4169 | 2.3991   | 0.000118 |
| salmon     | 9314  | GSE22886_NAIVE_TCELL_VS_NKCELL_UP             | 8   | 189  | 16064 | 127  | 5.41699  | 0.000119 |
| brown      | 2615  | GNF2_CASP4                                    | 11  | 24   | 16229 | 2190 | 3.401503 | 0.000119 |

|            |       |                                             |     |      |       |      |          |          |
|------------|-------|---------------------------------------------|-----|------|-------|------|----------|----------|
| brown      | 2673  | GNF2_MSN                                    | 11  | 24   | 16229 | 2190 | 3.401503 | 0.000119 |
| greenyello | 9492  | GSE26928_EFF_MEM_VS_CENTR_MEM_CD4_TCELL_UI  | 8   | 160  | 16093 | 150  | 5.417667 | 0.000119 |
| red        | 8567  | GSE13484_3H_UNSTIM_VS_YF17D_VACCINE_STIM_PB | 17  | 187  | 16066 | 524  | 2.819743 | 0.00012  |
| turquoise  | 86    | ORGANELLE_MEMBRANE                          | 101 | 284  | 15969 | 4169 | 1.386451 | 0.00012  |
| turquoise  | 8657  | GSE14308_INDUCED_VS_NATURAL_TREG_DN         | 73  | 193  | 16060 | 4169 | 1.474576 | 0.00012  |
| brown      | 3988  | PID_TCPTP_PATHWAY                           | 15  | 40   | 16213 | 2190 | 2.783048 | 0.000121 |
| lightcyan  | 635   | IMMUNE_RESPONSE                             | 6   | 203  | 16050 | 62   | 7.748133 | 0.000121 |
| magenta    | 10070 | GSE3982_BCELL_VS_TH2_UP                     | 9   | 184  | 16069 | 167  | 4.760381 | 0.000121 |
| purple     | 8449  | GSE11057_NAIVE_CD4_VS_PBMC_CD4_TCELL_DN     | 9   | 196  | 16057 | 157  | 4.753575 | 0.000122 |
| red        | 6328  | THEILGAARD_NEUTROPHIL_AT_SKIN_WOUND_DN      | 19  | 224  | 16029 | 524  | 2.630921 | 0.000123 |
| purple     | 3619  | MODULE_131                                  | 4   | 27   | 16226 | 157  | 15.33664 | 0.000124 |
| magenta    | 3530  | MODULE_41                                   | 14  | 424  | 15829 | 167  | 3.213507 | 0.000125 |
| salmon     | 6073  | BASSO_B_LYMPHOCYTE_NETWORK                  | 7   | 142  | 16111 | 127  | 6.308695 | 0.000125 |
| turquoise  | 9502  | GSE2706_UNSTIM_VS_2H_LPS_DC_UP              | 66  | 171  | 16082 | 4169 | 1.504698 | 0.000126 |
| brown      | 3116  | BIOCARTA_UCALPAIN_PATHWAY                   | 9   | 17   | 16236 | 2190 | 3.929009 | 0.000126 |
| turquoise  | 64    | ORGANELLE_LUMEN                             | 147 | 439  | 15814 | 4169 | 1.305433 | 0.000126 |
| turquoise  | 146   | MEMBRANE_ENCLOSED_LUMEN                     | 147 | 439  | 15814 | 4169 | 1.305433 | 0.000126 |
| brown      | 9865  | GSE360_L_DONOVANI_VS_B_MALAYI_HIGH_DOSE_MA  | 44  | 187  | 16066 | 2190 | 1.746226 | 0.000126 |
| green      | 2696  | GNF2_SERPINB5                               | 7   | 16   | 16237 | 1305 | 5.448803 | 0.000127 |
| lightgreen | 9726  | GSE30962_ACUTE_VS_CHRONIC_LCMV_PRIMARY_INF_ | 5   | 191  | 16062 | 42   | 10.13027 | 0.000127 |
| blue       | 10057 | GSE3982_NEUTROPHIL_VS_TH1_DN                | 57  | 195  | 16058 | 2978 | 1.595325 | 0.000127 |
| red        | 10129 | GSE6269_HEALTHY_VS_E_COLI_INF_PBMC_DN       | 14  | 136  | 16117 | 524  | 3.192945 | 0.000128 |
| cyan       | 1616  | V\$STAT3_01                                 | 3   | 21   | 16232 | 77   | 30.15399 | 0.000128 |
| red        | 9644  | GSE29615_CTRL_VS_LAIV_FLU_VACCINE_PBMC_UP   | 15  | 153  | 16100 | 524  | 3.0409   | 0.000129 |
| blue       | 2347  | MORF_ACP1                                   | 60  | 208  | 16045 | 2978 | 1.574334 | 0.000129 |
| turquoise  | 4680  | REACTOME_DNA_REPLICATION                    | 71  | 187  | 16066 | 4169 | 1.480193 | 0.000129 |
| turquoise  | 7253  | LEE_LIVER_CANCER_SURVIVAL_DN                | 65  | 168  | 16085 | 4169 | 1.508362 | 0.000129 |
| turquoise  | 167   | NUCLEOPLASM_PART                            | 76  | 203  | 16050 | 4169 | 1.459551 | 0.00013  |
| cyan       | 5237  | GRAESSMANN_APOPTOSIS_BY_DOXORUBICIN_UP      | 15  | 1072 | 15181 | 77   | 2.953516 | 0.00013  |
| brown      | 2680  | GNF2_PAK2                                   | 12  | 28   | 16225 | 2190 | 3.180626 | 0.00013  |
| magenta    | 6223  | PENG_RAPAMYCIN_RESPONSE_UP                  | 9   | 186  | 16067 | 167  | 4.709195 | 0.000131 |
| brown      | 2621  | GNF2_CD48                                   | 13  | 32   | 16221 | 2190 | 3.014969 | 0.000132 |
| brown      | 8003  | FARDIN_HYPOXIA_11                           | 13  | 32   | 16221 | 2190 | 3.014969 | 0.000132 |
| salmon     | 8943  | GSE17721_POLYIC_VS_PAM3CSK4_12H_BMDM_DN     | 8   | 192  | 16061 | 127  | 5.332349 | 0.000133 |
| blue       | 8771  | GSE15750_DAY6_VS_DAY10_EFF_CD8_TCELL_DN     | 56  | 191  | 16062 | 2978 | 1.60016  | 0.000133 |
| turquoise  | 8106  | FORTSCHEGGER_PHF8_TARGETS_UP                | 88  | 242  | 16011 | 4169 | 1.41765  | 0.000134 |
| red        | 4908  | CASORELLI_ACUTE_PROMYELOCYTIC_LEUKEMIA_UP   | 16  | 171  | 16082 | 524  | 2.902192 | 0.000135 |
| purple     | 6482  | CUI_TCF21_TARGETS_2_DN                      | 19  | 759  | 15494 | 157  | 2.591467 | 0.000135 |
| black      | 3265  | chr19q13                                    | 25  | 637  | 15616 | 283  | 2.253968 | 0.000135 |
| yellow     | 3635  | MODULE_150                                  | 7   | 15   | 16238 | 1426 | 5.318887 | 0.000135 |
| brown      | 2457  | MORF_RAC1                                   | 48  | 210  | 16043 | 2190 | 1.696334 | 0.000136 |
| red        | 10280 | GSE9988_LPS_VS_LPS_AND_ANTI_TREM1_MONOCYTE  | 17  | 189  | 16064 | 524  | 2.789905 | 0.000136 |
| salmon     | 7476  | ROME_INSULIN_TARGETS_IN_MUSCLE_UP           | 12  | 429  | 15824 | 127  | 3.579759 | 0.000136 |
| lightgreen | 8424  | GSE10325_CD4_TCELL_VS_MYELOID_UP            | 5   | 194  | 16059 | 42   | 9.973613 | 0.000137 |
| magenta    | 227   | PLASMA_MEMBRANE                             | 25  | 1095 | 15158 | 167  | 2.221994 | 0.000137 |
| salmon     | 4697  | REACTOME_HIV_INFECTION                      | 8   | 193  | 16060 | 127  | 5.30472  | 0.000137 |
| salmon     | 9786  | GSE34205_HEALTHY_VS_RSV_INF_INFANT_PBMC_UP  | 8   | 193  | 16060 | 127  | 5.30472  | 0.000137 |
| salmon     | 5500  | LUI_TARGETS_OF_PAX8_PPARG_FUSION            | 4   | 34   | 16219 | 127  | 15.05604 | 0.000138 |
| blue       | 2783  | KEGG_AMINOACYL_TRNA_BIOSYNTHESIS            | 18  | 41   | 16212 | 2978 | 2.396059 | 0.000138 |
| blue       | 2532  | GCM_MLL                                     | 51  | 170  | 16083 | 2978 | 1.637307 | 0.000139 |
| turquoise  | 3141  | chr8q22                                     | 26  | 52   | 16201 | 4169 | 1.949268 | 0.000139 |
| magenta    | 9384  | GSE22886_TH1_VS_TH2_48H_ACT_UP              | 8   | 147  | 16106 | 167  | 5.296509 | 0.00014  |
| brown      | 6249  | GALINDO_IMMUNE_RESPONSE_TO_ENTEROTOXIN      | 24  | 82   | 16171 | 2190 | 2.172135 | 0.00014  |
| turquoise  | 8724  | GSE14769_UNSTIM_VS_240MIN_LPS_BMDM_UP       | 74  | 197  | 16056 | 4169 | 1.464425 | 0.00014  |
| turquoise  | 9604  | GSE27786_NKCELL_VS_MONO_MAC_UP              | 74  | 197  | 16056 | 4169 | 1.464425 | 0.00014  |
| pink       | 6005  | NIKOLSKY_BREAST_CANCER_16P13_AMPLICON       | 8   | 108  | 16145 | 228  | 5.280377 | 0.00014  |
| blue       | 2517  | GCM_DPF2                                    | 14  | 28   | 16225 | 2978 | 2.728845 | 0.00014  |
| greenyello | 1675  | V\$PAX4_02                                  | 8   | 164  | 16089 | 150  | 5.285528 | 0.000142 |
| purple     | 4910  | CORRE_MULTIPLE_MYELOMA_UP                   | 5   | 52   | 16201 | 157  | 9.954067 | 0.000142 |
| salmon     | 8997  | GSE17721_LPS_VS_PAM3CSK4_12H_BMDM_DN        | 8   | 194  | 16059 | 127  | 5.277376 | 0.000142 |

|            |       |                                                 |     |      |       |      |          |          |
|------------|-------|-------------------------------------------------|-----|------|-------|------|----------|----------|
| yellow     | 7468  | IRITANI_MAD1_TARGETS_DN                         | 13  | 47   | 16206 | 1426 | 3.152532 | 0.000142 |
| magenta    | 8522  | GSE12845_PRE_GC_VS_DARKZONE_GC_TONSIL_BCELL     | 9   | 188  | 16065 | 167  | 4.659097 | 0.000143 |
| red        | 8497  | GSE12366_GC_VS_MEMORY_BCELL_DN                  | 17  | 190  | 16063 | 524  | 2.775221 | 0.000145 |
| brown      | 8695  | GSE1460_DP_VS_CD4_THYMOCYTE_DN                  | 42  | 177  | 16076 | 2190 | 1.761025 | 0.000146 |
| green      | 4877  | TURASHVILI_BREAST_DUCTAL_CARCINOMA_VS_DUCTA     | 26  | 150  | 16103 | 1305 | 2.158764 | 0.000147 |
| turquoise  | 5265  | BARRIER_CANCER_RELAPSE_TUMOR_SAMPLE_UP          | 11  | 15   | 16238 | 4169 | 2.858927 | 0.000147 |
| salmon     | 9008  | GSE17721_POLYIC_VS_CPG_4H_BMDM_UP               | 8   | 195  | 16058 | 127  | 5.250313 | 0.000147 |
| cyan       | 5629  | YAN_ESCAPE_FROM_ANOIKIS                         | 3   | 22   | 16231 | 77   | 28.78335 | 0.000148 |
| greenyello | 10112 | GSE39820_IL1B_IL6_VS_IL1B_IL6_IL23A_TREATED_CD4 | 8   | 165  | 16088 | 150  | 5.253495 | 0.000148 |
| magenta    | 1493  | V\$TAL1ALPHAE47_01                              | 9   | 189  | 16064 | 167  | 4.634445 | 0.000148 |
| grey60     | 6012  | NIKOLSKY_BREAST_CANCER_19Q13.4_AMPLICON         | 2   | 7    | 16246 | 44   | 105.539  | 0.000149 |
| lightgreen | 8399  | GOLDRATH_NAIVE_VS_EFF_CD8_TCELL_DN              | 5   | 198  | 16055 | 42   | 9.772126 | 0.00015  |
| turquoise  | 8896  | GSE17721_CTRL_VS_GARDIQUIMOD_0.5H_BMDM_UP       | 72  | 191  | 16062 | 4169 | 1.469606 | 0.000151 |
| brown      | 2749  | KEGG_OTHER_GLYCAN_DEGRADATION                   | 8   | 14   | 16239 | 2190 | 4.240835 | 0.000151 |
| lightcyan  | 7569  | MIKKELSEN_MCV6_LCP_WITH_H3K4ME3                 | 5   | 133  | 16120 | 62   | 9.855081 | 0.000151 |
| salmon     | 8395  | KAECH_DAY8_EFF_VS_MEMORY_CD8_TCELL_DN           | 8   | 196  | 16057 | 127  | 5.223526 | 0.000153 |
| salmon     | 10263 | GSE9650_EFFECTOR_VS_MEMORY_CD8_TCELL_DN         | 8   | 196  | 16057 | 127  | 5.223526 | 0.000153 |
| blue       | 2311  | MORF_HDAC1                                      | 70  | 253  | 16000 | 2978 | 1.510033 | 0.000153 |
| lightgreen | 9324  | GSE22886_CD8_TCELL_VS_BCELL_NAIVE_UP            | 5   | 199  | 16054 | 42   | 9.72302  | 0.000154 |
| brown      | 9898  | GSE36392_EOSINOPHIL_VS_NEUTROPHIL_IL25_TREATE   | 43  | 183  | 16070 | 2190 | 1.743841 | 0.000155 |
| cyan       | 5854  | RICKMAN_METASTASIS_DN                           | 7   | 244  | 16009 | 77   | 6.055514 | 0.000155 |
| red        | 6741  | GENTILE_UV_LOW_DOSE_DN                          | 9   | 62   | 16191 | 524  | 4.502493 | 0.000156 |
| magenta    | 7478  | VALK_AML_CLUSTER_1                              | 4   | 27   | 16226 | 167  | 14.41827 | 0.000157 |
| lightcyan  | 3607  | MODULE_119                                      | 5   | 134  | 16119 | 62   | 9.781536 | 0.000157 |
| brown      | 6634  | RODWELL_AGING_KIDNEY_UP                         | 87  | 443  | 15810 | 2190 | 1.457488 | 0.000158 |
| salmon     | 8386  | KAECH_NAIVE_VS_DAY8_EFF_CD8_TCELL_UP            | 8   | 197  | 16056 | 127  | 5.19701  | 0.000158 |
| yellow     | 5915  | STARK_PREFRONTAL_CORTEX_22Q11_DELETION_DN       | 68  | 498  | 15755 | 1426 | 1.556301 | 0.000159 |
| blue       | 229   | NUCLEOLUS                                       | 39  | 121  | 16132 | 2978 | 1.75909  | 0.000159 |
| brown      | 4891  | FULCHER_INFLAMMATORY_RESPONSE_LLECTIN_VS_LPS    | 86  | 437  | 15816 | 2190 | 1.460516 | 0.00016  |
| red        | 8764  | GSE15733_BM_VS_SPLEEN_MEMORY_CD4_TCELL_UP       | 15  | 156  | 16097 | 524  | 2.982421 | 0.00016  |
| magenta    | 5242  | GAUSSMANN_MLL_AF4_FUSION_TARGETS_A_DN           | 6   | 79   | 16174 | 167  | 7.391647 | 0.000161 |
| greenyello | 1315  | RECEPTOR_BINDING                                | 10  | 262  | 15991 | 150  | 4.135623 | 0.000162 |
| lightcyan  | 6303  | TAVOR_CEBPA_TARGETS_DN                          | 3   | 28   | 16225 | 62   | 28.08698 | 0.000162 |
| lightcyan  | 7359  | MUELLER_COMMON_TARGETS_OF_AML_FUSIONS_DN        | 3   | 28   | 16225 | 62   | 28.08698 | 0.000162 |
| turquoise  | 9103  | GSE17721_0.5H_VS_12H_POLYIC_BMDM_DN             | 70  | 185  | 16068 | 4169 | 1.475122 | 0.000162 |
| turquoise  | 9924  | GSE37416_CTRL_VS_3H_F_TULARENSIS_LVS_NEUTROP    | 70  | 185  | 16068 | 4169 | 1.475122 | 0.000162 |
| turquoise  | 2247  | TTGTTT_V\$FOXO4_01                              | 480 | 1632 | 14621 | 4169 | 1.146628 | 0.000162 |
| blue       | 2458  | MORF_RAF1                                       | 36  | 109  | 16144 | 2978 | 1.80254  | 0.000163 |
| brown      | 9623  | GSE28237_EARLY_VS_LATE_GC_BCELL_DN              | 44  | 189  | 16064 | 2190 | 1.727748 | 0.000163 |
| purple     | 7342  | POTTI_TOPOTECAN_SENSITIVITY                     | 7   | 120  | 16133 | 157  | 6.0388   | 0.000164 |
| brown      | 6796  | KRIGE_RESPONSE_TO_TOSEDOSTAT_24HR_UP            | 137 | 759  | 15494 | 2190 | 1.339579 | 0.000164 |
| brown      | 2995  | BIOCARTA_IL2_PATHWAY                            | 10  | 21   | 16232 | 2190 | 3.534029 | 0.000165 |
| purple     | 2671  | GNF2_MMP1                                       | 4   | 29   | 16224 | 157  | 14.27894 | 0.000165 |
| purple     | 3898  | MODULE_521                                      | 4   | 29   | 16224 | 157  | 14.27894 | 0.000165 |
| magenta    | 2832  | KEGG_CELL_ADHESION_MOLECULES_CAMS               | 7   | 113  | 16140 | 167  | 6.02888  | 0.000165 |
| turquoise  | 4751  | REACTOME_CLASS_I_MHC_MEDIATED_ANTIGEN_PROC      | 83  | 227  | 16026 | 4169 | 1.425456 | 0.000165 |
| brown      | 2643  | GNF2_FOS                                        | 15  | 41   | 16212 | 2190 | 2.715169 | 0.000167 |
| yellow     | 9951  | GSE3982_CTRL_VS_IGE_STIM_MAST_CELL_DN           | 31  | 178  | 16075 | 1426 | 1.984978 | 0.000167 |
| turquoise  | 1694  | V\$TGIF_01                                      | 74  | 198  | 16055 | 4169 | 1.457029 | 0.000168 |
| turquoise  | 8793  | GSE15930_NAIVE_VS_72H_IN_VITRO_STIM_IFNAB_CD    | 74  | 198  | 16055 | 4169 | 1.457029 | 0.000168 |
| turquoise  | 9311  | GSE22886_UNSTIM_VS_STIM_MEMORY_TCELL_DN         | 74  | 198  | 16055 | 4169 | 1.457029 | 0.000168 |
| turquoise  | 2531  | GCM_MAX                                         | 17  | 29   | 16224 | 4169 | 2.285349 | 0.000169 |
| red        | 7307  | ICHIBA_GRAFT_VERSUS_HOST_DISEASE_35D_UP         | 13  | 123  | 16130 | 524  | 3.278238 | 0.000169 |
| cyan       | 7605  | UROSEVIC_RESPONSE_TO_IMIQUIMOD                  | 3   | 23   | 16230 | 77   | 27.5319  | 0.000169 |
| turquoise  | 3176  | chr5q12                                         | 19  | 34   | 16219 | 4169 | 2.178594 | 0.000169 |
| yellow     | 26    | MITOCHONDRIAL_PART                              | 26  | 139  | 16114 | 1426 | 2.131928 | 0.00017  |
| turquoise  | 4967  | WANG_LMO4_TARGETS_DN                            | 115 | 333  | 15920 | 4169 | 1.346342 | 0.00017  |
| blue       | 9232  | GSE18791_CTRL_VS_NEWCASTLE_VIRUS_DC_14H_UP      | 57  | 197  | 16056 | 2978 | 1.579128 | 0.000172 |
| blue       | 9326  | GSE22886_CD4_TCELL_VS_BCELL_NAIVE_UP            | 57  | 197  | 16056 | 2978 | 1.579128 | 0.000172 |
| blue       | 9392  | GSE22886_NAIVE_CD4_TCELL_VS_48H_ACT_TH1_UP      | 57  | 197  | 16056 | 2978 | 1.579128 | 0.000172 |

|             |       |                                               |     |      |       |      |          |          |
|-------------|-------|-----------------------------------------------|-----|------|-------|------|----------|----------|
| brown       | 9147  | GSE17721_4_VS_24H_GARDIQUIMOD_BMDM_DN         | 45  | 195  | 16058 | 2190 | 1.712645 | 0.000172 |
| red         | 10127 | GSE6269_HEALTHY_VS_FLU_INF_PBMCDN             | 15  | 157  | 16096 | 524  | 2.963424 | 0.000172 |
| brown       | 3498  | MODULE_5                                      | 77  | 383  | 15870 | 2190 | 1.492043 | 0.000173 |
| greenyello  | 3616  | MODULE_128                                    | 6   | 89   | 16164 | 150  | 7.304719 | 0.000173 |
| turquoise   | 8184  | ZWANG_CLASS_1_TRANSIENTLY_INDUCED_BY_EGF      | 143 | 428  | 15825 | 4169 | 1.302549 | 0.000173 |
| magenta     | 9788  | GSE34205_HEALTHY_VS_FLU_INF_INFANT_PBMCDN     | 9   | 193  | 16060 | 167  | 4.538395 | 0.000174 |
| turquoise   | 7378  | HOFFMANN_LARGE_TO_SMALL_PRE_BII_LYMPHOCYTE    | 62  | 160  | 16093 | 4169 | 1.510683 | 0.000174 |
| greenyello  | 459   | DEFENSE_RESPONSE                              | 9   | 215  | 16038 | 150  | 4.535721 | 0.000174 |
| magenta     | 8173  | SMIRNOV_RESPONSE_TO_IR_6HR_DN                 | 7   | 114  | 16139 | 167  | 5.975995 | 0.000175 |
| turquoise   | 9224  | GSE18791_CTRL_VS_NEWCASTLE_VIRUS_DC_6H_UP     | 73  | 195  | 16058 | 4169 | 1.459452 | 0.000175 |
| turquoise   | 9608  | GSE27786_NKTCELL_VS_NEUTROPHIL_UP             | 73  | 195  | 16058 | 4169 | 1.459452 | 0.000175 |
| turquoise   | 9897  | GSE36392_EOSINOPHIL_VS_MAC_IL25_TREATED_LUNC  | 73  | 195  | 16058 | 4169 | 1.459452 | 0.000175 |
| cyan        | 9869  | GSE360_L_DONOVANI_VS_M_TUBERCULOSIS_MAC_DN    | 6   | 174  | 16079 | 77   | 7.278549 | 0.000175 |
| turquoise   | 6430  | IVANOVA_HEMATOPOIESIS_LATE_PROGENITOR         | 168 | 514  | 15739 | 4169 | 1.27423  | 0.000175 |
| salmon      | 9353  | GSE22886_NEUTROPHIL_VS_DC_DN                  | 8   | 200  | 16053 | 127  | 5.119055 | 0.000175 |
| salmon      | 9388  | GSE22886_CTRL_VS_LPS_24H_DC_UP                | 8   | 200  | 16053 | 127  | 5.119055 | 0.000175 |
| cyan        | 7061  | SMID_BREAST_CANCER_LUMINAL_B_DN               | 9   | 425  | 15828 | 77   | 4.469885 | 0.000176 |
| blue        | 9816  | GSE360_DC_VS_MAC_UP                           | 53  | 180  | 16073 | 2978 | 1.606986 | 0.000176 |
| red         | 9836  | GSE360_L_DONOVANI_VS_B_MALAYI_LOW_DOSE_DC     | 16  | 175  | 16078 | 524  | 2.835856 | 0.000176 |
| lightyellow | 5049  | TONKS_TARGETS_OF_RUNX1_RUNX1T1_FUSION_MON     | 3   | 54   | 16199 | 33   | 27.36195 | 0.000176 |
| purple      | 4831  | SCHUETZ_BREAST_CANCER_DUCTAL_INVASIVE_UP      | 11  | 303  | 15950 | 157  | 3.758235 | 0.000177 |
| brown       | 6588  | VERRECCHIA_EARLY_RESPONSE_TO_TGFB1            | 17  | 50   | 16203 | 2190 | 2.523297 | 0.000178 |
| magenta     | 3519  | MODULE_27                                     | 11  | 285  | 15968 | 167  | 3.75634  | 0.000179 |
| lightcyan   | 7348  | RUTELLA_RESPONSE_TO_CSF2RB_AND_IL4_DN         | 7   | 312  | 15941 | 62   | 5.881462 | 0.000179 |
| red         | 7836  | KAMIKUBO_MYELOID_CEBPA_NETWORK                | 6   | 27   | 16226 | 524  | 6.892706 | 0.000181 |
| turquoise   | 8711  | GSE1460_NAIVE_CD4_TCELL_CORD_BLOOD_VS_THYMI   | 72  | 192  | 16061 | 4169 | 1.461951 | 0.000181 |
| turquoise   | 8932  | GSE17721_POLYIC_VS_PAM3CSK4_1H_BMDM_UP        | 72  | 192  | 16061 | 4169 | 1.461951 | 0.000181 |
| purple      | 2282  | CATTGTYY_V\$SOX9_B1                           | 11  | 304  | 15949 | 157  | 3.745872 | 0.000182 |
| purple      | 4388  | REACTOME_P130CAS_LINKAGE_TO_MAPK_SIGNALING    | 3   | 12   | 16241 | 157  | 25.88057 | 0.000182 |
| purple      | 4393  | REACTOME_GRB2_SOS_PROVIDES_LINKAGE_TO_MAPK    | 3   | 12   | 16241 | 157  | 25.88057 | 0.000182 |
| purple      | 5124  | GRAHAM_CML_DIVIDING_VS_NORMAL_DIVIDING_UP     | 3   | 12   | 16241 | 157  | 25.88057 | 0.000182 |
| purple      | 6762  | DASU_IL6_SIGNALING_SCAR_DN                    | 3   | 12   | 16241 | 157  | 25.88057 | 0.000182 |
| salmon      | 6116  | TARTE_PLASMA_CELL_VS_PLASMABLAST_UP           | 10  | 315  | 15938 | 127  | 4.062742 | 0.000183 |
| purple      | 5120  | GRAHAM_CML_QUIESCENT_VS_NORMAL_QUIESCENT      | 6   | 86   | 16167 | 157  | 7.222486 | 0.000184 |
| cyan        | 8961  | GSE17721_PAM3CSK4_VS_CPG_12H_BMDM_DN          | 6   | 176  | 16077 | 77   | 7.195838 | 0.000186 |
| turquoise   | 5386  | LASTOWSKA_NEUROBLASTOMA_COPY_NUMBER_DN        | 244 | 781  | 15472 | 4169 | 1.217981 | 0.000186 |
| magenta     | 1595  | V\$OCT1_Q6                                    | 9   | 195  | 16058 | 167  | 4.491847 | 0.000188 |
| salmon      | 6615  | ZHANG_RESPONSE_TO_CANTHARIDIN_DN              | 5   | 68   | 16185 | 127  | 9.410028 | 0.000189 |
| brown       | 2858  | KEGG_REGULATION_OF_ACTIN_CYTOSKELETON         | 42  | 179  | 16074 | 2190 | 1.741348 | 0.00019  |
| brown       | 9967  | GSE3982_DC_VS_NEUTROPHIL_LPS_STIM_DN          | 40  | 168  | 16085 | 2190 | 1.767015 | 0.000192 |
| red         | 6963  | MASSARWEH_TAMOXIFEN_RESISTANCE_UP             | 33  | 523  | 15730 | 524  | 1.957107 | 0.000193 |
| brown       | 9111  | GSE17721_4H_VS_24H_POLYIC_BMDM_DN             | 45  | 196  | 16057 | 2190 | 1.703907 | 0.000194 |
| brown       | 9942  | GSE37416_0H_VS_48H_F_TULARENSIS_LVS_NEUTROPHI | 45  | 196  | 16057 | 2190 | 1.703907 | 0.000194 |
| brown       | 4492  | REACTOME_SEMA4D_IN_SEMAPHORIN_SIGNALING       | 12  | 29   | 16224 | 2190 | 3.070949 | 0.000195 |
| greenyello  | 3567  | MODULE_79                                     | 6   | 91   | 16162 | 150  | 7.144176 | 0.000195 |
| blue        | 9882  | GSE360_T_GONDII_VS_M_TUBERCULOSIS_MAC_UP      | 54  | 185  | 16068 | 2978 | 1.593055 | 0.000196 |
| turquoise   | 2051  | AAACCAC,MIR-140                               | 41  | 96   | 16157 | 4169 | 1.665    | 0.000196 |
| greenyello  | 10257 | GSE9650_NAIVE_VS_EXHAUSTED_CD8_TCELL_DN       | 8   | 172  | 16081 | 150  | 5.03969  | 0.000196 |
| blue        | 2480  | MORF_UBE2N                                    | 32  | 94   | 16159 | 2978 | 1.857937 | 0.000197 |
| cyan        | 8889  | GSE17721_CTRL_VS_CPG_6H_BMDM_DN               | 6   | 178  | 16075 | 77   | 7.114986 | 0.000198 |
| salmon      | 8145  | HOLLEMAN_VINCRISTINE_RESISTANCE_B_ALL_DN      | 3   | 15   | 16238 | 127  | 25.59528 | 0.000198 |
| purple      | 6256  | ALCALAY_AML_BY_NPM1_LOCALIZATION_UP           | 7   | 124  | 16129 | 157  | 5.844    | 0.000201 |
| blue        | 2593  | GNF2_MLH1                                     | 18  | 42   | 16211 | 2978 | 2.33901  | 0.000201 |
| blue        | 4398  | REACTOME_TRNA_AMINOACYLATION                  | 18  | 42   | 16211 | 2978 | 2.33901  | 0.000201 |
| turquoise   | 9343  | GSE22886_IGM_MEMORY_BCELL_VS_BLOOD_PLASMA     | 74  | 199  | 16054 | 4169 | 1.449707 | 0.000201 |
| turquoise   | 9556  | GSE27786_LIN_NEG_VS_ERYTHROBLAST_UP           | 74  | 199  | 16054 | 4169 | 1.449707 | 0.000201 |
| greenyello  | 345   | SIGNAL_TRANSDUCTION                           | 26  | 1331 | 14922 | 150  | 2.116594 | 0.000202 |
| red         | 2233  | TGANTCA_V\$AP1_C                              | 49  | 895  | 15358 | 524  | 1.698147 | 0.000202 |
| turquoise   | 2013  | TATTATA,MIR-374                               | 86  | 238  | 16015 | 4169 | 1.408715 | 0.000202 |
| yellow      | 9596  | GSE27786_CD8_TCELL_VS_MONO_MAC_UP             | 33  | 196  | 16057 | 1426 | 1.918986 | 0.000203 |

|             |                                                    |     |      |       |      |          |          |
|-------------|----------------------------------------------------|-----|------|-------|------|----------|----------|
| blue        | 2366 MORF_CDK2                                     | 26  | 71   | 16182 | 2978 | 1.998591 | 0.000204 |
| tan         | 10068 GSE3982_BCELL_VS_TH1_UP                      | 8   | 179  | 16074 | 145  | 5.009594 | 0.000205 |
| lightcyan   | 6889 FOSTER_TOLERANT_MACROPHAGE_UP                 | 5   | 142  | 16111 | 62   | 9.230463 | 0.000206 |
| red         | 5934 AMIT_EGF_RESPONSE_40_MCF10A                   | 5   | 18   | 16235 | 524  | 8.615882 | 0.000207 |
| greenyellow | 3653 MODULE_170                                    | 6   | 92   | 16161 | 150  | 7.066522 | 0.000208 |
| magenta     | 6299 YU_MYC_TARGETS_DN                             | 5   | 53   | 16200 | 167  | 9.181448 | 0.000208 |
| purple      | 2822 KEGG_VASCULAR_SMOOTH_MUSCLE_CONTRACTION       | 6   | 88   | 16165 | 157  | 7.058338 | 0.000208 |
| red         | 4906 THUM_SYSTOLIC_HEART_FAILURE_UP                | 26  | 374  | 15879 | 524  | 2.156274 | 0.000209 |
| cyan        | 9033 GSE17721_PAM3CSK4_VS_GADIQUIMOD_12H_BMDM      | 6   | 180  | 16073 | 77   | 7.035931 | 0.00021  |
| brown       | 8910 GSE17721_CTRL_VS_GARDIQUIMOD_24H_BMDM_UP      | 44  | 191  | 16062 | 2190 | 1.709656 | 0.00021  |
| purple      | 6324 LI_WILMS_TUMOR_VS_FETAL_KIDNEY_1_UP           | 8   | 166  | 16087 | 157  | 4.989026 | 0.000211 |
| cyan        | 3201 chr1p22                                       | 4   | 62   | 16191 | 77   | 13.61793 | 0.000211 |
| purple      | 136 INTEGRAL_TO_PLASMA_MEMBRANE                    | 18  | 721  | 15532 | 157  | 2.584468 | 0.000211 |
| magenta     | 1461 AACTTT_UNKNOWN                                | 30  | 1473 | 14780 | 167  | 1.982146 | 0.000212 |
| salmon      | 7002 DAIRKEE_CANCER_PRONE_RESPONSE_BPA_E2          | 6   | 109  | 16144 | 127  | 7.044571 | 0.000212 |
| red         | 5792 BUYTAERT_PHOTODYNAMIC_THERAPY_STRESS_UP       | 44  | 778  | 15475 | 524  | 1.754185 | 0.000213 |
| red         | 8324 RPS14_DN.V1_UP                                | 16  | 178  | 16075 | 524  | 2.788061 | 0.000214 |
| red         | 8901 GSE17721_CTRL_VS_GARDIQUIMOD_2H_BMDM_DN       | 16  | 178  | 16075 | 524  | 2.788061 | 0.000214 |
| turquoise   | 7860 CHICAS_RB1_TARGETS_SENESCENT                  | 166 | 509  | 15744 | 4169 | 1.271429 | 0.000215 |
| purple      | 2262 YTATTTNR_V\$MEF2_02                           | 15  | 535  | 15718 | 157  | 2.902494 | 0.000215 |
| purple      | 2687 GNF2_PTX3                                     | 4   | 31   | 16222 | 157  | 13.35772 | 0.000215 |
| purple      | 5857 FRIDMAN_IMMORTALIZATION_DN                    | 4   | 31   | 16222 | 157  | 13.35772 | 0.000215 |
| red         | 7068 SMID_BREAST_CANCER_BASAL_UP                   | 32  | 504  | 15749 | 524  | 1.969344 | 0.000216 |
| yellow      | 6797 KRIGE_RESPONSE_TO_TOSEDOSTAT_24HR_DN          | 118 | 980  | 15273 | 1426 | 1.372366 | 0.000216 |
| cyan        | 8479 GSE11864_CSF1_PAM3CYS_VS_CSF1_IFNG_PAM3CYS_   | 6   | 181  | 16072 | 77   | 6.997058 | 0.000216 |
| cyan        | 9507 GSE2706_UNSTIM_VS_2H_LPS_AND_R848_DC_DN       | 6   | 181  | 16072 | 77   | 6.997058 | 0.000216 |
| red         | 6578 LU_AGING_BRAIN_UP                             | 19  | 234  | 16019 | 524  | 2.518489 | 0.000216 |
| salmon      | 2504 GCM_CFBF                                      | 5   | 70   | 16183 | 127  | 9.14117  | 0.000217 |
| turquoise   | 8256 CAMP_UP.V1_UP                                 | 72  | 193  | 16060 | 4169 | 1.454376 | 0.000218 |
| turquoise   | 9550 GSE27786_LIN_NEG_VS_CD8_TCELL_UP              | 72  | 193  | 16060 | 4169 | 1.454376 | 0.000218 |
| turquoise   | 9598 GSE27786_NKCELL_VS_NKTCELL_UP                 | 72  | 193  | 16060 | 4169 | 1.454376 | 0.000218 |
| turquoise   | 9724 GSE30962_PRIMARY_VS_SECONDARY_CHRONIC_LCMV    | 72  | 193  | 16060 | 4169 | 1.454376 | 0.000218 |
| turquoise   | 10108 GSE39820_CTRL_VS_TGFBETA3_IL6_CD4_TCELL_UP   | 72  | 193  | 16060 | 4169 | 1.454376 | 0.000218 |
| turquoise   | 10168 GSE7460_CTRL_VS_TGFB_TREATED_ACT_FOXP3_HET_1 | 72  | 193  | 16060 | 4169 | 1.454376 | 0.000218 |
| blue        | 7456 MILI_PSEUDOPODIA_HAPTOTAXIS_DN                | 154 | 647  | 15606 | 2978 | 1.299048 | 0.000218 |
| turquoise   | 2095 CTTTGTA,MIR-524                               | 126 | 372  | 15881 | 4169 | 1.320472 | 0.000218 |
| lightgreen  | 118 INTEGRAL_TO_MEMBRANE                           | 10  | 1025 | 15228 | 42   | 3.775377 | 0.000219 |
| lightcyan   | 5771 GROSS_ELK3_TARGETS_DN                         | 3   | 31   | 16222 | 62   | 25.36889 | 0.00022  |
| purple      | 3616 MODULE_128                                    | 6   | 89   | 16164 | 157  | 6.979031 | 0.000222 |
| brown       | 6955 MARTINEZ_TP53_TARGETS_UP                      | 99  | 522  | 15731 | 2190 | 1.407519 | 0.000222 |
| cyan        | 9405 GSE24081_CONTROLLER_VS_PROGRESSOR_HIV_SPECIF  | 6   | 182  | 16071 | 77   | 6.958613 | 0.000223 |
| red         | 9443 GSE24634_TREG_VS_TCONV_POST_DAY5_IL4_CONVERT  | 17  | 197  | 16056 | 524  | 2.676609 | 0.000224 |
| turquoise   | 5061 UDAYAKUMAR_MED1_TARGETS_UP                    | 52  | 130  | 16123 | 4169 | 1.559415 | 0.000226 |
| turquoise   | 4637 REACTOME_TRAF6_MEDIATED_INDUCION_OF_NFKB_     | 33  | 73   | 16180 | 4169 | 1.762352 | 0.000226 |
| turquoise   | 9105 GSE17721_0.5H_VS_4H_POLYIC_BMDM_DN            | 71  | 190  | 16063 | 4169 | 1.456822 | 0.000226 |
| turquoise   | 6815 MONNIER_POSTRADIATION_TUMOR_ESCAPE_DN         | 120 | 352  | 15901 | 4169 | 1.329047 | 0.000227 |
| turquoise   | 5858 SCHAEFFER_PROSTATE_DEVELOPMENT_6HR_UP         | 60  | 155  | 16098 | 4169 | 1.509111 | 0.000227 |
| brown       | 9825 GSE360_DC_VS_MAC_B_MALAYI_HIGH_DOSE_DN        | 43  | 186  | 16067 | 2190 | 1.715714 | 0.000227 |
| brown       | 4085 PID_THROMBIN_PAR1_PATHWAY                     | 15  | 42   | 16211 | 2190 | 2.650522 | 0.000228 |
| brown       | 5450 MARTIN_INTERACT_WITH_HDAC                     | 15  | 42   | 16211 | 2190 | 2.650522 | 0.000228 |
| cyan        | 9501 GSE2706_UNSTIM_VS_8H_R848_DC_DN               | 6   | 183  | 16070 | 77   | 6.920588 | 0.000229 |
| blue        | 613 REGULATION_OF_GENE_EXPRESSION                  | 143 | 595  | 15658 | 2978 | 1.31168  | 0.00023  |
| cyan        | 5440 RASHI_RESPONSE_TO_IONIZING_RADIATION_2        | 5   | 117  | 16136 | 77   | 9.020424 | 0.000232 |
| purple      | 4489 REACTOME_G_ALPHA_I_SIGNALLING_EVENTS          | 7   | 127  | 16126 | 157  | 5.705953 | 0.000233 |
| yellow      | 2715 GNF2_UBE2I                                    | 12  | 43   | 16210 | 1426 | 3.18073  | 0.000233 |
| lightgreen  | 7304 GOLDRATH_ANTIGEN_RESPONSE                     | 6   | 343  | 15910 | 42   | 6.769263 | 0.000234 |
| brown       | 7312 LINDSTEDT_DENDRITIC_CELL_MATURATION_D         | 20  | 65   | 16188 | 2190 | 2.283527 | 0.000234 |
| turquoise   | 8472 GSE11864_CSF1_VS_CSF1_IFNG_PAM3CYS_IN_MAC_U   | 70  | 187  | 16066 | 4169 | 1.459345 | 0.000235 |
| turquoise   | 8931 GSE17721_POLYIC_VS_PAM3CSK4_0.5H_BMDM_DN      | 70  | 187  | 16066 | 4169 | 1.459345 | 0.000235 |
| turquoise   | 9093 GSE17721_0.5H_VS_12H_LPS_BMDM_DN              | 70  | 187  | 16066 | 4169 | 1.459345 | 0.000235 |



|             |                                                     |     |      |       |      |          |          |
|-------------|-----------------------------------------------------|-----|------|-------|------|----------|----------|
| cyan        | 9302 GSE2197_CPG_DNA_VS_UNTREATED_IN_DC_UP          | 6   | 184  | 16069 | 77   | 6.882976 | 0.000236 |
| cyan        | 9527 GSE2706_2H_VS_8H_R848_AND_LPS_STIM_DC_DN       | 6   | 184  | 16069 | 77   | 6.882976 | 0.000236 |
| pink        | 3576 MODULE_88                                      | 21  | 633  | 15620 | 228  | 2.364908 | 0.000237 |
| blue        | 9983 GSE3982_EOSINOPHIL_VS_EFF_MEMORY_CD4_TCELL_    | 53  | 182  | 16071 | 2978 | 1.589327 | 0.000239 |
| greenyello  | 9487 GSE26928_NAIVE_VS_EFF_MEMORY_CD4_TCELL_DN      | 8   | 177  | 16076 | 150  | 4.897326 | 0.000239 |
| cyan        | 6634 RODWELL_AGING_KIDNEY_UP                        | 9   | 443  | 15810 | 77   | 4.288265 | 0.000239 |
| red         | 6862 ZHENG_BOUND_BY_FOXP3                           | 30  | 463  | 15790 | 524  | 2.009752 | 0.000239 |
| turquoise   | 9495 GSE26928_EFF_MEMORY_VS_CXCR5_POS_CD4_TCELL_    | 64  | 168  | 16085 | 4169 | 1.485157 | 0.000243 |
| turquoise   | 5903 BENPORATH_SOX2_TARGETS                         | 216 | 685  | 15568 | 4169 | 1.22932  | 0.000243 |
| cyan        | 9505 GSE2706_UNSTIM_VS_8H_LPS_DC_DN                 | 6   | 185  | 16068 | 77   | 6.84577  | 0.000243 |
| cyan        | 10162 GSE7460_TREG_VS_TCONV_ACT_UP                  | 6   | 185  | 16068 | 77   | 6.84577  | 0.000243 |
| purple      | 5058 PAPASPYRIDONOS_UNSTABLE_ATEROSCLEROTIC_PLAQ    | 4   | 32   | 16221 | 157  | 12.94029 | 0.000244 |
| purple      | 6843 LEIN_ASTROCYTE_MARKERS                         | 4   | 32   | 16221 | 157  | 12.94029 | 0.000244 |
| turquoise   | 9995 GSE3982_MAST_CELL_VS_MAC_DN                    | 69  | 184  | 16069 | 4169 | 1.461951 | 0.000244 |
| lightgreen  | 8189 ZWANG_TRANSIENTLY_UP_BY_1ST_EGF_PULSE_ONLY     | 12  | 1472 | 14781 | 42   | 3.154697 | 0.000246 |
| blue        | 4435 REACTOME_MRNA_SPLICING                         | 35  | 107  | 16146 | 2978 | 1.785226 | 0.000246 |
| yellow      | 9255 GSE19825_NAIVE_VS_DAY3_EFF_CD8_TCELL_DN        | 33  | 198  | 16055 | 1426 | 1.899603 | 0.000246 |
| tan         | 9465 GSE25087_FETAL_VS_ADULT_TREG_DN                | 8   | 184  | 16069 | 145  | 4.873463 | 0.000247 |
| brown       | 8474 GSE11864_CSF1_IFNG_VS_CSF1_PAM3CYS_IN_MAC_U    | 45  | 198  | 16055 | 2190 | 1.686696 | 0.000248 |
| purple      | 9513 GSE2706_R848_VS_LPS_8H_STIM_DC_DN              | 8   | 170  | 16083 | 157  | 4.871637 | 0.000248 |
| lightgreen  | 41 INTRINSIC_TO_MEMBRANE                            | 10  | 1041 | 15212 | 42   | 3.717351 | 0.000249 |
| purple      | 7061 SMID_BREAST_CANCER_LUMINAL_B_DN                | 13  | 425  | 15828 | 157  | 3.166564 | 0.00025  |
| purple      | 3567 MODULE_79                                      | 6   | 91   | 16162 | 157  | 6.825646 | 0.00025  |
| cyan        | 9133 GSE17721_0.5H_VS_24H_CPG_BMDM_DN               | 6   | 186  | 16067 | 77   | 6.808965 | 0.000251 |
| brown       | 4028 PID_ECADHERIN_NASCENTAJ_PATHWAY                | 14  | 38   | 16215 | 2190 | 2.734223 | 0.000252 |
| magenta     | 976 REGULATION_OF_MULTICELLULAR_ORGANISMAL_PRO      | 7   | 121  | 16132 | 167  | 5.630277 | 0.000252 |
| yellow      | 8416 GSE10239_KLRG1INT_VS_KLRG1HIGH_EFF_CD8_TCELL_  | 31  | 182  | 16071 | 1426 | 1.941352 | 0.000252 |
| turquoise   | 7411 ZHANG_TLX_TARGETS_UP                           | 38  | 88   | 16165 | 4169 | 1.683459 | 0.000253 |
| red         | 3649 MODULE_165                                     | 9   | 66   | 16187 | 524  | 4.229615 | 0.000253 |
| lightgreen  | 1012 CELLULAR_DEFENSE_RESPONSE                      | 3   | 48   | 16205 | 42   | 24.18601 | 0.000256 |
| magenta     | 7500 POOLA_INVASIVE_BREAST_CANCER_UP                | 10  | 249  | 16004 | 167  | 3.908568 | 0.000257 |
| red         | 6312 ABBUD_LIF_SIGNALING_1_UP                       | 7   | 40   | 16213 | 524  | 5.428006 | 0.000257 |
| purple      | 5044 TONKS_TARGETS_OF_RUNX1_RUNX1T1_FUSION_HSC_     | 8   | 171  | 16082 | 157  | 4.843148 | 0.000258 |
| cyan        | 8723 GSE14769_UNSTIM_VS_120MIN_LPS_BMDM_DN          | 6   | 187  | 16066 | 77   | 6.772554 | 0.000258 |
| purple      | 14 INTRINSIC_TO_PLASMA_MEMBRANE                     | 18  | 733  | 15520 | 157  | 2.542157 | 0.000258 |
| turquoise   | 1996 GTGCCTT,MIR-506                                | 207 | 654  | 15599 | 4169 | 1.233941 | 0.000259 |
| red         | 9803 GSE360_CTRL_VS_M_TUBERCULOSIS_DC_DN            | 16  | 181  | 16072 | 524  | 2.74185  | 0.000259 |
| red         | 10076 GSE3982_BASOPHIL_VS_NKCELL_UP                 | 16  | 181  | 16072 | 524  | 2.74185  | 0.000259 |
| brown       | 2682 GNF2_PECAM1                                    | 18  | 56   | 16197 | 2190 | 2.38547  | 0.000259 |
| turquoise   | 69 NUCLEAR_LUMEN                                    | 125 | 370  | 15883 | 4169 | 1.317073 | 0.00026  |
| turquoise   | 3201 chr1p22                                        | 29  | 62   | 16191 | 4169 | 1.823509 | 0.00026  |
| turquoise   | 4408 REACTOME_CYCLIN_E_ASSOCIATED_EVENTS_DURING_    | 29  | 62   | 16191 | 4169 | 1.823509 | 0.00026  |
| greenyello  | 3340 chr11q25                                       | 3   | 14   | 16239 | 150  | 23.21857 | 0.00026  |
| red         | 8305 EIF4E_DN                                       | 11  | 96   | 16157 | 524  | 3.554051 | 0.000261 |
| turquoise   | 10120 GSE39820_TGFBETA1_VS_TGFBETA3_IN_IL6_IL23A_TR | 67  | 178  | 16075 | 4169 | 1.467427 | 0.000263 |
| salmon      | 6805 ZHONG_SECRETOME_OF_LUNG_CANCER_AND_MACRC       | 5   | 73   | 16180 | 127  | 8.765505 | 0.000264 |
| blue        | 2333 MORF_RPA2                                      | 54  | 187  | 16066 | 2978 | 1.576017 | 0.000265 |
| pink        | 1541 V\$GATA1_03                                    | 10  | 183  | 16070 | 228  | 3.89536  | 0.000265 |
| cyan        | 9037 GSE17721_PAM3CSK4_VS_GADIQUIMOD_24H_BMDM       | 6   | 188  | 16065 | 77   | 6.736529 | 0.000265 |
| purple      | 3653 MODULE_170                                     | 6   | 92   | 16161 | 157  | 6.751454 | 0.000266 |
| brown       | 2999 BIOCARTA_IL6_PATHWAY                           | 10  | 22   | 16231 | 2190 | 3.373391 | 0.000266 |
| brown       | 4306 REACTOME_EGFR_DOWNREGULATION                   | 10  | 22   | 16231 | 2190 | 3.373391 | 0.000266 |
| brown       | 4496 REACTOME_LYSOSOME_VESICLE_BIOGENESIS           | 10  | 22   | 16231 | 2190 | 3.373391 | 0.000266 |
| yellow      | 3571 MODULE_83                                      | 46  | 309  | 15944 | 1426 | 1.696732 | 0.000266 |
| purple      | 5645 MOHANKUMAR_TLX1_TARGETS_DN                     | 7   | 130  | 16123 | 157  | 5.574277 | 0.000269 |
| lightyellow | 10137 GSE6269_FLU_VS_STREP_AUREUS_INF_PBMCDN        | 4   | 156  | 16097 | 33   | 12.62859 | 0.000269 |
| turquoise   | 9030 GSE17721_PAM3CSK4_VS_GADIQUIMOD_8H_BMDM_       | 71  | 191  | 16062 | 4169 | 1.449194 | 0.000271 |
| turquoise   | 9060 GSE17721_POLYIC_VS_GARDIQUIMOD_2H_BMDM_UP      | 71  | 191  | 16062 | 4169 | 1.449194 | 0.000271 |
| salmon      | 10084 GSE3982_EFF_MEMORY_CD4_TCELL_VS_NKCELL_UP     | 7   | 161  | 16092 | 127  | 5.56419  | 0.000271 |
| magenta     | 3960 PID_INTEGRIN3_PATHWAY                          | 4   | 31   | 16222 | 167  | 12.55785 | 0.000272 |

|             |      |                                               |     |      |       |      |          |          |
|-------------|------|-----------------------------------------------|-----|------|-------|------|----------|----------|
| cyan        | 8617 | GSE14000_UNSTIM_VS_16H_LPS_DC_TRANSLATED_RN   | 6   | 189  | 16064 | 77   | 6.700886 | 0.000273 |
| cyan        | 7511 | BOVAULT_LIVER_CANCER_SUBCLASS_G5_DN           | 3   | 27   | 16226 | 77   | 23.4531  | 0.000276 |
| blue        | 9873 | GSE360_L_MAJOR_VS_B_MALAYI_HIGH_DOSE_MAC_D    | 53  | 183  | 16070 | 2978 | 1.580642 | 0.000277 |
| turquoise   | 8202 | GCNP_SHH_UP_EARLY.V1_UP                       | 60  | 156  | 16097 | 4169 | 1.499437 | 0.000277 |
| brown       | 9351 | GSE22886_DAY1_VS_DAY7_MONOCYTE_IN_CULTURE_    | 45  | 199  | 16054 | 2190 | 1.67822  | 0.000279 |
| brown       | 9373 | GSE22886_NAIVE_CD8_TCELL_VS_DC_DN             | 45  | 199  | 16054 | 2190 | 1.67822  | 0.000279 |
| brown       | 6957 | MARTINEZ_RB1_AND_TP53_TARGETS_UP              | 98  | 519  | 15734 | 2190 | 1.401355 | 0.00028  |
| cyan        | 8638 | GSE14308_TH1_VS_TH17_UP                       | 6   | 190  | 16063 | 77   | 6.665619 | 0.000281 |
| cyan        | 9520 | GSE2706_LPS_VS_R848_AND_LPS_8H_STIM_DC_UP     | 6   | 190  | 16063 | 77   | 6.665619 | 0.000281 |
| cyan        | 3654 | MODULE_171                                    | 5   | 122  | 16131 | 77   | 8.650735 | 0.000282 |
| turquoise   | 1986 | ATGCTGC,MIR-103,MIR-107                       | 70  | 188  | 16065 | 4169 | 1.451583 | 0.000282 |
| turquoise   | 9548 | GSE27786_LIN_NEG_VS_CD4_TCELL_UP              | 70  | 188  | 16065 | 4169 | 1.451583 | 0.000282 |
| turquoise   | 9943 | GSE37416_0H_VS_48H_F_TULARENSIS_LVS_NEUTROPH  | 70  | 188  | 16065 | 4169 | 1.451583 | 0.000282 |
| lightcyan   | 8215 | CSR_LATE_UP.V1_DN                             | 5   | 152  | 16101 | 62   | 8.623196 | 0.000282 |
| turquoise   | 9807 | GSE360_CTRL_VS_L_MAJOR_MAC_DN                 | 65  | 172  | 16081 | 4169 | 1.473284 | 0.000283 |
| blue        | 2306 | MORF_ESPL1                                    | 23  | 61   | 16192 | 2978 | 2.057817 | 0.000284 |
| blue        | 2332 | MORF_RPA1                                     | 23  | 61   | 16192 | 2978 | 2.057817 | 0.000284 |
| brown       | 6316 | VERHAAK_AML_WITH_NPM1_MUTATED_UP              | 40  | 171  | 16082 | 2190 | 1.736014 | 0.000285 |
| brown       | 2963 | BIOCARTA_EGF_PATHWAY                          | 12  | 30   | 16223 | 2190 | 2.968584 | 0.000285 |
| brown       | 975  | CYTOKINE_SECRETION                            | 8   | 15   | 16238 | 2190 | 3.958113 | 0.000285 |
| red         | 345  | SIGNAL_TRANSDUCTION                           | 66  | 1331 | 14922 | 524  | 1.538042 | 0.000286 |
| midnightb   | 4808 | PICCALUGA_ANGIOIMMUNOBLASTIC_LYMPHOMA_DN      | 5   | 133  | 16120 | 71   | 8.605846 | 0.000287 |
| cyan        | 8719 | GSE14769_UNSTIM_VS_60MIN_LPS_BMDM_DN          | 6   | 191  | 16062 | 77   | 6.63072  | 0.000289 |
| purple      | 8100 | ALFANO_MYC_TARGETS                            | 9   | 220  | 16033 | 157  | 4.235003 | 0.00029  |
| brown       | 9120 | GSE17721_0.5H_VS_24H_PAM3CSK4_BMDM_UP         | 43  | 188  | 16065 | 2190 | 1.697462 | 0.00029  |
| yellow      | 8318 | RB_P130_DN.V1_UP                              | 22  | 113  | 16140 | 1426 | 2.219005 | 0.000291 |
| greenyello  | 539  | VIRAL_REPRODUCTION                            | 4   | 35   | 16218 | 150  | 12.38324 | 0.000292 |
| greenyello  | 2898 | KEGG_GRAFT_VERSUS_HOST_DISEASE                | 4   | 35   | 16218 | 150  | 12.38324 | 0.000292 |
| blue        | 1277 | ATPASE_ACTIVITY_COUPLED                       | 29  | 84   | 16169 | 2978 | 1.884202 | 0.000293 |
| turquoise   | 8880 | GSE17721_CTRL_VS_CPG_0.5H_BMDM_UP             | 69  | 185  | 16068 | 4169 | 1.454049 | 0.000293 |
| red         | 8721 | GSE14769_UNSTIM_VS_80MIN_LPS_BMDM_DN          | 16  | 183  | 16070 | 524  | 2.711884 | 0.000293 |
| purple      | 8325 | IL15_UP.V1_DN                                 | 7   | 132  | 16121 | 157  | 5.489819 | 0.000295 |
| pink        | 7053 | SMID_BREAST_CANCER_RELAPSE_IN_BONE_DN         | 11  | 221  | 16032 | 228  | 3.548127 | 0.000296 |
| tan         | 9472 | GSE26495_NAIVE_VS_PD1HIGH_CD8_TCELL_UP        | 8   | 189  | 16064 | 145  | 4.744536 | 0.000296 |
| magenta     | 809  | ANATOMICAL_STRUCTURE_DEVELOPMENT              | 18  | 696  | 15557 | 167  | 2.516983 | 0.000297 |
| red         | 7632 | SAKAI_CHRONIC_HEPATITIS_VS_LIVER_CANCER_UP    | 10  | 82   | 16171 | 524  | 3.782582 | 0.000297 |
| cyan        | 9737 | GSE31082_DP_VS_CD4_SP_THYMOCYTE_DN            | 6   | 192  | 16061 | 77   | 6.596185 | 0.000297 |
| turquoise   | 7446 | WENDT_COHESIN_TARGETS_UP                      | 17  | 30   | 16223 | 4169 | 2.209171 | 0.000297 |
| yellow      | 8121 | FOSTER_KDM1A_TARGETS_DN                       | 33  | 200  | 16053 | 1426 | 1.880607 | 0.000298 |
| lightgreen  | 7813 | BROWNE_HCMV_INFECTION_30MIN_DN                | 4   | 125  | 16128 | 42   | 12.38324 | 0.000298 |
| purple      | 7977 | AZARE_NEOPLASTIC_TRANSFORMATION_BY_STAT3_UP   | 3   | 14   | 16239 | 157  | 22.18335 | 0.000298 |
| turquoise   | 3191 | chr14q13                                      | 12  | 18   | 16235 | 4169 | 2.599025 | 0.000298 |
| turquoise   | 8404 | GSE10094_LCMV_VS_LISTERIA_IND_EFF_CD4_TCELL_U | 73  | 198  | 16055 | 4169 | 1.437339 | 0.000298 |
| turquoise   | 3501 | MODULE_8                                      | 132 | 395  | 15858 | 4169 | 1.302802 | 0.000299 |
| purple      | 5062 | UDAYAKUMAR_MED1_TARGETS_DN                    | 9   | 221  | 16032 | 157  | 4.21584  | 0.0003   |
| red         | 2643 | GNF2_FOS                                      | 7   | 41   | 16212 | 524  | 5.295615 | 0.000302 |
| red         | 4987 | OSWALD_HEMATOPOIETIC_STEM_CELL_IN_COLLAGEN    | 18  | 221  | 16032 | 524  | 2.526286 | 0.000303 |
| brown       | 7349 | RUTELLA_RESPONSE_TO_HGF_UP                    | 79  | 402  | 15851 | 2190 | 1.458446 | 0.000303 |
| turquoise   | 1    | NUCLEOPLASM                                   | 94  | 267  | 15986 | 4169 | 1.372519 | 0.000303 |
| brown       | 2620 | GNF2_CD33                                     | 17  | 52   | 16201 | 2190 | 2.426247 | 0.000304 |
| blue        | 2339 | MORF_TERF1                                    | 24  | 65   | 16188 | 2978 | 2.015147 | 0.000306 |
| green       | 6133 | YAGI_AML_RELAPSE_PROGNOSIS                    | 10  | 35   | 16218 | 1305 | 3.558402 | 0.000307 |
| brown       | 2654 | GNF2_INPP5D                                   | 15  | 43   | 16210 | 2190 | 2.588882 | 0.000307 |
| greenyello  | 1278 | G_PROTEIN_COUPLED_RECEPTOR_ACTIVITY           | 6   | 99   | 16154 | 150  | 6.566869 | 0.000309 |
| yellow      | 7255 | MOOTHA_MITOCHONDRIA                           | 59  | 427  | 15826 | 1426 | 1.574846 | 0.00031  |
| red         | 8220 | AKT_UP.V1_UP                                  | 14  | 148  | 16105 | 524  | 2.934057 | 0.000311 |
| lightyellow | 5016 | TAKEDA_TARGETS_OF_NUP98_HOXA9_FUSION_16D_U    | 4   | 162  | 16091 | 33   | 12.16087 | 0.000311 |
| lightgreen  | 5134 | WAMUNYOKOLI_OVARIAN_CANCER_GRADES_1_2_UP      | 4   | 127  | 16126 | 42   | 12.18823 | 0.000316 |
| red         | 5017 | TAKEDA_TARGETS_OF_NUP98_HOXA9_FUSION_16D_D    | 13  | 131  | 16122 | 524  | 3.07804  | 0.000317 |
| green       | 2697 | GNF2_SERPINI2                                 | 5   | 9    | 16244 | 1305 | 6.919115 | 0.000317 |

|            |                                                    |     |      |       |      |          |          |
|------------|----------------------------------------------------|-----|------|-------|------|----------|----------|
| turquoise  | 8031 IKEDA_MIR30_TARGETS_UP                        | 46  | 113  | 16140 | 4169 | 1.587015 | 0.000317 |
| red        | 3332 chr15q                                        | 3   | 5    | 16248 | 524  | 18.61031 | 0.000317 |
| black      | 8188 ZWANG_TRANSIENTLY_UP_BY_2ND_EGF_PULSE_ONLY    | 34  | 1044 | 15209 | 283  | 1.870361 | 0.000318 |
| turquoise  | 2046 TTGCCAA,MIR-182                               | 102 | 294  | 15959 | 4169 | 1.352554 | 0.000318 |
| red        | 2878 KEGG_LEISHMANIA_INFECTION                     | 9   | 68   | 16185 | 524  | 4.105214 | 0.000319 |
| pink       | 2778 KEGG_PORPHYRIN_AND_CHLOROPHYLL_METABOLISM     | 4   | 24   | 16229 | 228  | 11.88085 | 0.000321 |
| turquoise  | 2337 MORF_SP3                                      | 35  | 80   | 16173 | 4169 | 1.70561  | 0.000323 |
| turquoise  | 2453 MORF_RAB1A                                    | 71  | 192  | 16061 | 4169 | 1.441646 | 0.000323 |
| turquoise  | 8640 GSE14308_TH1_VS_NAIVE_CD4_TCELL_UP            | 71  | 192  | 16061 | 4169 | 1.441646 | 0.000323 |
| turquoise  | 10104 GSE39820_CTRL_VS_TGFBETA1_IL6_CD4_TCELL_UP   | 71  | 192  | 16061 | 4169 | 1.441646 | 0.000323 |
| pink       | 1366 STRUCTURAL_CONSTITUENT_OF_CYTOSKELETON        | 5   | 43   | 16210 | 228  | 8.288964 | 0.000324 |
| lightgreen | 5313 MCBRYAN_PUBERTAL_TGFB1_TARGETS_DN             | 3   | 52   | 16201 | 42   | 22.32555 | 0.000325 |
| salmon     | 9438 GSE24634_NAIVE_CD4_TCELL_VS_DAY10_IL4_CONV_T  | 7   | 166  | 16087 | 127  | 5.396594 | 0.000327 |
| brown      | 9114 GSE17721_0.5H_VS_12H_PAM3CSK4_BMDM_UP         | 43  | 189  | 16064 | 2190 | 1.688481 | 0.000328 |
| brown      | 9461 GSE24634_IL4_VS_CTRL_TREATED_NAIVE_CD4_TCELL_ | 43  | 189  | 16064 | 2190 | 1.688481 | 0.000328 |
| turquoise  | 3636 MODULE_151                                    | 107 | 311  | 15942 | 4169 | 1.341297 | 0.000329 |
| magenta    | 7878 DUTERTRE ESTRADIOL_RESPONSE_24HR_DN           | 14  | 466  | 15787 | 167  | 2.923878 | 0.000329 |
| purple     | 6735 SATO_SILENCED_BY_METHYLATION_IN_PANCREATIC_C  | 11  | 326  | 15927 | 157  | 3.493084 | 0.000332 |
| brown      | 381 PROGRAMMED_CELL_DEATH                          | 77  | 391  | 15862 | 2190 | 1.461515 | 0.000336 |
| blue       | 5506 SCHLOSSER_MYC_TARGETS_AND_SERUM_RESPONSE_U    | 19  | 47   | 16206 | 2978 | 2.2063   | 0.000337 |
| turquoise  | 10179 GSE7460_WT_VS_FOXP3_HET_ACT_TCONV_DN         | 70  | 189  | 16064 | 4169 | 1.443903 | 0.000337 |
| magenta    | 4446 REACTOME_AXON_GUIDANCE                        | 9   | 211  | 16042 | 167  | 4.151233 | 0.000337 |
| lightcyan  | 8372 KRAS.KIDNEY_UP.V1_DN                          | 4   | 87   | 16166 | 62   | 12.05265 | 0.000337 |
| purple     | 8324 RPS14_DN.V1_UP                                | 8   | 178  | 16075 | 157  | 4.652687 | 0.000338 |
| yellow     | 148 MITOCHONDRIAL_INNER_MEMBRANE                   | 15  | 64   | 16189 | 1426 | 2.671316 | 0.000338 |
| yellow     | 4597 REACTOME_RESPIRATORY_ELECTRON_TRANSPORT       | 15  | 64   | 16189 | 1426 | 2.671316 | 0.000338 |
| yellow     | 5797 LOPEZ_MBD_TARGETS                             | 108 | 893  | 15360 | 1426 | 1.378435 | 0.000339 |
| cyan       | 7868 GREGORY_SYNTHETIC_LETHAL_WITH_IMATINIB        | 5   | 127  | 16126 | 77   | 8.310154 | 0.000339 |
| salmon     | 5950 SAKAI_TUMOR_INFILTRATING_MONOCYTES_DN         | 5   | 77   | 16176 | 127  | 8.310154 | 0.000339 |
| salmon     | 6189 SANA_RESPONSE_TO_IFNG_DN                      | 5   | 77   | 16176 | 127  | 8.310154 | 0.000339 |
| brown      | 2940 BIOCARTA_CELL2CELL_PATHWAY                    | 7   | 12   | 16241 | 2190 | 4.329186 | 0.00034  |
| turquoise  | 2535 GCM_MYST2                                     | 65  | 173  | 16080 | 4169 | 1.464768 | 0.000342 |
| brown      | 4134 REACTOME_GAP_JUNCTION_DEGRADATION             | 6   | 9    | 16244 | 2190 | 4.947641 | 0.000347 |
| brown      | 6137 IIZUKA_LIVER_CANCER_PROGRESSION_G2_G3_DN      | 6   | 9    | 16244 | 2190 | 4.947641 | 0.000347 |
| greenyello | 7248 VART_KSHV_INFECTION_ANGIOGENIC_MARKERS_UP     | 7   | 142  | 16111 | 150  | 5.341362 | 0.000349 |
| yellow     | 6175 MOOTHA_VOXPPOS                                | 18  | 85   | 16168 | 1426 | 2.413613 | 0.000349 |
| salmon     | 902 RIBOSOME_BIOGENESIS_AND_ASSEMBLY               | 3   | 18   | 16235 | 127  | 21.3294  | 0.000349 |
| blue       | 1686 V\$SOX9_B1                                    | 57  | 202  | 16051 | 2978 | 1.540041 | 0.00035  |
| cyan       | 1490 V\$IRF1_01                                    | 6   | 198  | 16055 | 77   | 6.396301 | 0.00035  |
| purple     | 2858 KEGG_REGULATION_OF_ACTIN_CYTOSKELETON         | 8   | 179  | 16074 | 157  | 4.626695 | 0.000351 |
| blue       | 64 ORGANELLE_LUMEN                                 | 109 | 439  | 15814 | 2978 | 1.355098 | 0.000351 |
| blue       | 146 MEMBRANE_ENCLOSED_LUMEN                        | 109 | 439  | 15814 | 2978 | 1.355098 | 0.000351 |
| yellow     | 1197 STRUCTURAL_CONSTITUENT_OF_RIBOSOME            | 17  | 78   | 16175 | 1426 | 2.484096 | 0.000353 |
| purple     | 4612 REACTOME_PLATELET_HOMEOSTASIS                 | 5   | 63   | 16190 | 157  | 8.216055 | 0.000353 |
| purple     | 5231 CONCANNON_APOPTOSIS_BY_EPOXOMICIN_UP          | 9   | 226  | 16027 | 157  | 4.122569 | 0.000354 |
| brown      | 3475 SIG_INSULIN_RECEPTOR_PATHWAY_IN_CARDIAC_MYO   | 16  | 48   | 16205 | 2190 | 2.47382  | 0.000354 |
| turquoise  | 8608 GSE14000_TRANSLATED_RNA_VS_MRNA_DC_UP         | 73  | 199  | 16054 | 4169 | 1.430117 | 0.000354 |
| blue       | 6610 KAAB_HEART_ATRIUM_VS_VENTRICLE_DN             | 64  | 233  | 16020 | 2978 | 1.499108 | 0.000357 |
| magenta    | 8034 LIU_TOPBP1_TARGETS                            | 3   | 14   | 16239 | 167  | 20.855   | 0.000357 |
| brown      | 7036 ACEVEDO_LIVER_TUMOR_VS_NORMAL_ADJACENT_TIS    | 146 | 831  | 15422 | 2190 | 1.303891 | 0.000357 |
| lightcyan  | 8380 LEF1_UP.V1_DN                                 | 5   | 160  | 16093 | 62   | 8.192036 | 0.000357 |
| greenyello | 1783 V\$CRX_Q4                                     | 8   | 188  | 16065 | 150  | 4.61078  | 0.000359 |
| pink       | 7304 GOLDRATH_ANTIGEN_RESPONSE                     | 14  | 343  | 15910 | 228  | 2.909595 | 0.000359 |
| yellow     | 8 ORGANELLAR_RIBOSOME                              | 8   | 22   | 16231 | 1426 | 4.144588 | 0.000359 |
| yellow     | 194 MITOCHONDRIAL_RIBOSOME                         | 8   | 22   | 16231 | 1426 | 4.144588 | 0.000359 |
| turquoise  | 2105 TGCCTTA,MIR-124A                              | 162 | 500  | 15753 | 4169 | 1.263126 | 0.000359 |
| turquoise  | 5570 PATIL_LIVER_CANCER                            | 219 | 700  | 15553 | 4169 | 1.219685 | 0.00036  |
| magenta    | 8366 KRAS.600_UP.V1_DN                             | 8   | 169  | 16084 | 167  | 4.607023 | 0.000361 |
| turquoise  | 1471 V\$CETS1P54_01                                | 87  | 245  | 16008 | 4169 | 1.384378 | 0.000362 |
| brown      | 807 IMMUNE_SYSTEM_PROCESS                          | 60  | 289  | 15964 | 2190 | 1.540788 | 0.000363 |

|             |                                                    |     |      |       |      |          |          |
|-------------|----------------------------------------------------|-----|------|-------|------|----------|----------|
| salmon      | 2435 MORF_PPP1CA                                   | 7   | 169  | 16084 | 127  | 5.300797 | 0.000364 |
| salmon      | 8966 GSE17721_CPG_VS_GARDIQUIMOD_0.5H_BMDM_UP      | 7   | 169  | 16084 | 127  | 5.300797 | 0.000364 |
| turquoise   | 151 MICROTUBULE_ORGANIZING_CENTER                  | 29  | 63   | 16190 | 4169 | 1.794565 | 0.000365 |
| blue        | 9322 GSE22886_TCELL_VS_BCELL_NAIVE_UP              | 56  | 198  | 16055 | 2978 | 1.543589 | 0.000368 |
| turquoise   | 4556 REACTOME_MITOTIC_M_M_G1_PHASES                | 63  | 167  | 16086 | 4169 | 1.470706 | 0.000368 |
| turquoise   | 8440 GSE10463_CD40L_AND_VA347_VS_CD40L_IN_DC_UP    | 63  | 167  | 16086 | 4169 | 1.470706 | 0.000368 |
| turquoise   | 10156 GSE7460_CTRL_VS_TGFB_TREATED_ACT_TREG_UP     | 72  | 196  | 16057 | 4169 | 1.432116 | 0.000369 |
| turquoise   | 10159 GSE7460_CD8_TCELL_VS_TREG_ACT_DN             | 72  | 196  | 16057 | 4169 | 1.432116 | 0.000369 |
| brown       | 9416 GSE24142_EARLY_THYMIC_PROGENITOR_VS_DN3_THY   | 43  | 190  | 16063 | 2190 | 1.679594 | 0.00037  |
| yellow      | 3514 MODULE_22                                     | 12  | 45   | 16208 | 1426 | 3.039364 | 0.00037  |
| blue        | 9987 GSE3982_EOSINOPHIL_VS_NKCELL_DN               | 53  | 185  | 16068 | 2978 | 1.563554 | 0.000371 |
| blue        | 10051 GSE3982_NEUTROPHIL_VS_EFF_MEMORY_CD4_TCELL_  | 53  | 185  | 16068 | 2978 | 1.563554 | 0.000371 |
| brown       | 2935 BIOCARTA_CCR3_PATHWAY                         | 9   | 19   | 16234 | 2190 | 3.515429 | 0.000371 |
| greenyello  | 7559 MEISSNER_NPC_HCP_WITH_H3K4ME2_AND_H3K27ME     | 8   | 189  | 16064 | 150  | 4.586384 | 0.000372 |
| magenta     | 2026 GTGGTGA,MIR-197                               | 5   | 60   | 16193 | 167  | 8.110279 | 0.000373 |
| brown       | 6285 NEMETH_INFLAMMATORY_RESPONSE_LPS_UP           | 24  | 87   | 16166 | 2190 | 2.0473   | 0.000374 |
| turquoise   | 2154 CAGCACT,MIR-512-3P                            | 49  | 123  | 16130 | 4169 | 1.553076 | 0.000377 |
| pink        | 5279 TANG_SENESCENCE_TP53_TARGETS_UP               | 4   | 25   | 16228 | 228  | 11.40561 | 0.000378 |
| salmon      | 7771 KYNG_RESPONSE_TO_H2O2_VIA_ERCC6_DN            | 4   | 44   | 16209 | 127  | 11.63422 | 0.000379 |
| brown       | 2618 GNF2_CD14                                     | 13  | 35   | 16218 | 2190 | 2.756543 | 0.00038  |
| turquoise   | 8604 GSE13738_RESTING_VS_BYSTANDER_ACTIVATED_CD4_  | 62  | 164  | 16089 | 4169 | 1.473837 | 0.000382 |
| black       | 8252 SRC_UP.V1_UP                                  | 9   | 127  | 16126 | 283  | 4.06992  | 0.000383 |
| brown       | 5270 BERENJENO_TRANSFORMED_BY_RHOA_DN              | 72  | 362  | 15891 | 2190 | 1.476092 | 0.000383 |
| brown       | 8605 GSE13738_RESTING_VS_BYSTANDER_ACTIVATED_CD4_  | 44  | 196  | 16057 | 2190 | 1.666042 | 0.000383 |
| green       | 8593 GSE13485_DAY7_VS_DAY21_YF17D_VACCINE_PBMC_L   | 19  | 101  | 16152 | 1305 | 2.342908 | 0.000385 |
| lightgreen  | 50 MEMBRANE_PART                                   | 11  | 1316 | 14937 | 42   | 3.234603 | 0.000385 |
| greenyello  | 10220 GSE8678_IL7R_LOW_VS_HIGH_EFF_CD8_TCELL_UP    | 8   | 190  | 16063 | 150  | 4.562246 | 0.000385 |
| lightyellow | 3523 MODULE_33                                     | 5   | 312  | 15941 | 33   | 7.892871 | 0.000385 |
| turquoise   | 3637 MODULE_152                                    | 48  | 120  | 16133 | 4169 | 1.559415 | 0.000386 |
| blue        | 9276 GSE20366_CD103_POS_VS_CD103_KLRG1_DP_TREG_L   | 49  | 168  | 16085 | 2978 | 1.591826 | 0.000386 |
| grey60      | 1503 V\$EVI1_01                                    | 2   | 11   | 16242 | 44   | 67.16116 | 0.000388 |
| cyan        | 1720 V\$IRF7_01                                    | 6   | 202  | 16051 | 77   | 6.269641 | 0.00039  |
| salmon      | 9947 GSE37416_12H_VS_48H_F_TULARENSIS_LVS_NEUTROI  | 7   | 171  | 16082 | 127  | 5.238799 | 0.000391 |
| turquoise   | 3571 MODULE_83                                     | 106 | 309  | 15944 | 4169 | 1.337362 | 0.000395 |
| cyan        | 6179 SANA_TNF_SIGNALING_UP                         | 4   | 73   | 16180 | 77   | 11.56591 | 0.000396 |
| greenyello  | 1657 V\$FREAC7_01                                  | 7   | 145  | 16108 | 150  | 5.230851 | 0.000396 |
| red         | 8929 GSE17721_LPS_VS_POLYIC_24H_BMDM_DN            | 16  | 188  | 16065 | 524  | 2.63976  | 0.000397 |
| red         | 10042 GSE3982_MAC_VS_TH1_UP                        | 16  | 188  | 16065 | 524  | 2.63976  | 0.000397 |
| green       | 5905 BENPORATH_SUZ12_TARGETS                       | 73  | 612  | 15641 | 1305 | 1.485575 | 0.000398 |
| magenta     | 59 MEMBRANE                                        | 31  | 1601 | 14652 | 167  | 1.884462 | 0.000398 |
| lightyellow | 8200 ERB2_UP.V1_UP                                 | 4   | 173  | 16080 | 33   | 11.38763 | 0.000399 |
| brown       | 10225 GSE9006_HEALTHY_VS_TYPE_1_DIABETES_PBMC_AT_I | 42  | 185  | 16068 | 2190 | 1.684872 | 0.000401 |
| turquoise   | 9568 GSE27786_BCELL_VS_NKTCELL_UP                  | 70  | 190  | 16063 | 4169 | 1.436303 | 0.000401 |
| grey60      | 9354 GSE22886_NEUTROPHIL_VS_MONOCYTE_UP            | 4   | 129  | 16124 | 44   | 11.45384 | 0.000402 |
| greenyello  | 7589 ONO_AML1_TARGETS_DN                           | 4   | 38   | 16215 | 150  | 11.40561 | 0.000403 |
| blue        | 2522 GCM_GSPT1                                     | 48  | 164  | 16089 | 2978 | 1.597373 | 0.000403 |
| brown       | 9969 GSE3982_MAC_VS_NEUTROPHIL_LPS_STIM_DN         | 37  | 157  | 16096 | 2190 | 1.749007 | 0.000405 |
| salmon      | 6807 ZHONG_SECRETOME_OF_LUNG_CANCER_AND_FIBROB     | 6   | 123  | 16130 | 127  | 6.24275  | 0.000408 |
| blue        | 8602 GSE13738_RESTING_VS_TCR_ACTIVATED_CD4_TCELL_I | 51  | 177  | 16076 | 2978 | 1.572555 | 0.000408 |
| greenyello  | 5063 ODonnell_TFRC_TARGETS_UP                      | 11  | 350  | 15903 | 150  | 3.40539  | 0.000409 |
| magenta     | 50 MEMBRANE_PART                                   | 27  | 1316 | 14937 | 167  | 1.996756 | 0.000409 |
| salmon      | 2369 MORF_CSNK2B                                   | 9   | 286  | 15967 | 127  | 4.027229 | 0.000413 |
| yellow      | 4704 REACTOME_RESPIRATORY_ELECTRON_TRANSPORT_AT    | 17  | 79   | 16174 | 1426 | 2.452651 | 0.000413 |
| greenyello  | 50 MEMBRANE_PART                                   | 25  | 1316 | 14937 | 150  | 2.058384 | 0.000414 |
| green       | 5907 BENPORATH_ES_WITH_H3K27ME3                    | 77  | 654  | 15599 | 1305 | 1.466344 | 0.000414 |
| brown       | 3051 BIOCARTA_RAS_PATHWAY                          | 10  | 23   | 16230 | 2190 | 3.226722 | 0.000414 |
| purple      | 6746 WANG_SMARCE1_TARGETS_UP                       | 9   | 231  | 16022 | 157  | 4.033336 | 0.000415 |
| brown       | 8888 GSE17721_CTRL_VS_CPG_6H_BMDM_UP               | 43  | 191  | 16062 | 2190 | 1.6708   | 0.000416 |
| cyan        | 7082 MOSERLE_IFNA_RESPONSE                         | 3   | 31   | 16222 | 77   | 20.4269  | 0.000418 |
| turquoise   | 9023 GSE17721_PAM3CSK4_VS_GADIQUIMOD_1H_BMDM_      | 69  | 187  | 16066 | 4169 | 1.438498 | 0.000418 |

|             |       |                                               |     |      |       |      |          |          |
|-------------|-------|-----------------------------------------------|-----|------|-------|------|----------|----------|
| turquoise   | 8785  | GSE15930_NAIVE_VS_48H_IN_VITRO_STIM_IL12_CD8_ | 73  | 200  | 16053 | 4169 | 1.422966 | 0.00042  |
| red         | 9031  | GSE17721_PAM3CSK4_VS_GADIQUIMOD_8H_BMDM_      | 16  | 189  | 16064 | 524  | 2.625793 | 0.000421 |
| red         | 10153 | GSE7460_TCONV_VS_TREG_THYMUS_DN               | 16  | 189  | 16064 | 524  | 2.625793 | 0.000421 |
| blue        | 2539  | GCM_NUMA1                                     | 21  | 55   | 16198 | 2978 | 2.083845 | 0.000423 |
| pink        | 4914  | DIAZ_CHRONIC_MEYLOGENOUS_LEUKEMIA_UP          | 35  | 1378 | 14875 | 228  | 1.810579 | 0.000424 |
| salmon      | 5646  | DAIRKEE_TERT_TARGETS_UP                       | 10  | 350  | 15903 | 127  | 3.656468 | 0.000424 |
| midnightb   | 3265  | chr19q13                                      | 10  | 637  | 15616 | 71   | 3.59365  | 0.000425 |
| magenta     | 7395  | LEE_RECENT_THYMIC_EMIGRANT                    | 9   | 218  | 16035 | 167  | 4.017937 | 0.000428 |
| purple      | 4482  | REACTOME_GPCR_DOWNSTREAM_SIGNALING            | 11  | 336  | 15917 | 157  | 3.389123 | 0.000428 |
| turquoise   | 2097  | ATGCAGT,MIR-217                               | 41  | 99   | 16154 | 4169 | 1.614546 | 0.00043  |
| purple      | 5723  | TOMLINS_PROSTATE_CANCER_DN                    | 4   | 37   | 16216 | 157  | 11.1916  | 0.000432 |
| purple      | 6376  | ZHAN_MULTIPLE_MYELOMA_DN                      | 4   | 37   | 16216 | 157  | 11.1916  | 0.000432 |
| purple      | 7004  | YAMASHITA_METHYLATED_IN_PROSTATE_CANCER       | 4   | 37   | 16216 | 157  | 11.1916  | 0.000432 |
| brown       | 5848  | RICKMAN_TUMOR_DIFFERENTIATED_WELL_VS_POORL    | 67  | 333  | 15920 | 2190 | 1.493207 | 0.000432 |
| turquoise   | 179   | CENTROSOME                                    | 26  | 55   | 16198 | 4169 | 1.842945 | 0.000434 |
| brown       | 9760  | GSE3337_CTRL_VS_4H_IFNG_IN_CD8POS_DC_UP       | 41  | 180  | 16073 | 2190 | 1.690444 | 0.000434 |
| turquoise   | 2043  | ATAGGAA,MIR-202                               | 39  | 93   | 16160 | 4169 | 1.63487  | 0.000435 |
| lightcyan   | 9793  | GSE360_CTRL_VS_L_DONOVANI_DC_DN               | 5   | 167  | 16086 | 62   | 7.848658 | 0.000435 |
| magenta     | 6318  | BASSO_CD40_SIGNALING_DN                       | 5   | 62   | 16191 | 167  | 7.848658 | 0.000435 |
| turquoise   | 8907  | GSE17721_CTRL_VS_GARDIQUIMOD_8H_BMDM_DN       | 68  | 184  | 16069 | 4169 | 1.440764 | 0.000436 |
| blue        | 601   | REGULATION_OF_CELLULAR_METABOLIC_PROCESS      | 163 | 700  | 15553 | 2978 | 1.270862 | 0.000437 |
| turquoise   | 8789  | GSE15930_NAIVE_VS_72H_IN_VITRO_STIM_CD8_TCELI | 72  | 197  | 16056 | 4169 | 1.424846 | 0.000438 |
| turquoise   | 8795  | GSE15930_NAIVE_VS_72H_IN_VITRO_STIM_TRICHOST, | 72  | 197  | 16056 | 4169 | 1.424846 | 0.000438 |
| turquoise   | 8934  | GSE17721_POLYIC_VS_PAM3CSK4_2H_BMDM_UP        | 72  | 197  | 16056 | 4169 | 1.424846 | 0.000438 |
| lightcyan   | 2842  | KEGG_CYTOSOLIC_DNA_SENSING_PATHWAY            | 3   | 39   | 16214 | 62   | 20.16501 | 0.000438 |
| purple      | 6038  | ONDER_CDH1_SIGNALING_VIA_CTNNB1               | 5   | 66   | 16187 | 157  | 7.842598 | 0.000439 |
| purple      | 9892  | GSE36392_TYPE_2_MYELOID_VS_MAC_IL25_TREATED_  | 7   | 141  | 16112 | 157  | 5.139405 | 0.00044  |
| brown       | 529   | RAS_PROTEIN_SIGNAL_TRANSDUCTION               | 19  | 63   | 16190 | 2190 | 2.238218 | 0.000442 |
| brown       | 7980  | DELPUECH_FOXO3_TARGETS_UP                     | 19  | 63   | 16190 | 2190 | 2.238218 | 0.000442 |
| greenyello  | 8422  | GSE10325_CD4_TCELL_VS_BCELL_UP                | 8   | 194  | 16059 | 150  | 4.468179 | 0.000442 |
| pink        | 7825  | RAGHAVACHARI_PLATELET_SPECIFIC_GENES          | 6   | 70   | 16183 | 228  | 6.11015  | 0.000443 |
| red         | 593   | INFLAMMATORY_RESPONSE                         | 11  | 102  | 16151 | 524  | 3.34499  | 0.000444 |
| lightyellow | 8353  | KRAS.DF.V1_UP                                 | 4   | 178  | 16075 | 33   | 11.06776 | 0.000444 |
| magenta     | 6937  | HELLER_HDAC_TARGETS_SILENCED_BY_METHYLATION_  | 10  | 267  | 15986 | 167  | 3.645069 | 0.000446 |
| red         | 8445  | GSE11057_NAIVE_VS_EFF_MEMORY_CD4_TCELL_DN     | 16  | 190  | 16063 | 524  | 2.611973 | 0.000447 |
| greenyello  | 10142 | GSE6269_E_COLI_VS_STREP_PNEUMO_INF_PBMC_UP    | 7   | 148  | 16105 | 150  | 5.12482  | 0.000448 |
| purple      | 8188  | ZWANG_TRANSIENTLY_UP_BY_2ND_EGF_PULSE_ONLY    | 22  | 1044 | 15209 | 157  | 2.181504 | 0.000448 |
| purple      | 6578  | LU_AGING_BRAIN_UP                             | 9   | 234  | 16019 | 157  | 3.981627 | 0.000456 |
| greenyello  | 10255 | GSE9650_NAIVE_VS_EFF_CD8_TCELL_DN             | 8   | 195  | 16058 | 150  | 4.445265 | 0.000458 |
| cyan        | 7235  | ISHIKAWA_STING_SIGNALING                      | 2   | 7    | 16246 | 77   | 60.30798 | 0.000458 |
| purple      | 5103  | KIM_WT1_TARGETS_12HR_UP                       | 7   | 142  | 16111 | 157  | 5.103212 | 0.000459 |
| yellow      | 5998  | NIKOLSKY_BREAST_CANCER_8Q23_Q24_AMPLICON      | 24  | 132  | 16121 | 1426 | 2.072294 | 0.000459 |
| purple      | 3502  | MODULE_9                                      | 6   | 102  | 16151 | 157  | 6.089547 | 0.000463 |
| grey60      | 1073  | CARBOHYDRATE_BINDING                          | 3   | 56   | 16197 | 44   | 19.78856 | 0.000464 |
| greenyello  | 1455  | AAANWWTGC_UNKNOWN                             | 7   | 149  | 16104 | 150  | 5.090425 | 0.000466 |
| turquoise   | 1817  | V\$E4F1_Q6                                    | 88  | 250  | 16003 | 4169 | 1.372285 | 0.000466 |
| red         | 807   | IMMUNE_SYSTEM_PROCESS                         | 21  | 289  | 15964 | 524  | 2.253843 | 0.000467 |
| brown       | 2453  | MORF_RAB1A                                    | 43  | 192  | 16061 | 2190 | 1.662098 | 0.000467 |
| brown       | 8662  | GSE1432_CTRL_VS_IFNG_24H_MICROGLIA_UP         | 43  | 192  | 16061 | 2190 | 1.662098 | 0.000467 |
| blue        | 1510  | V\$MZF1_02                                    | 54  | 191  | 16062 | 2978 | 1.543012 | 0.000468 |
| lightgreen  | 4173  | REACTOME_IMMUNOREGULATORY_INTERACTIONS_BE     | 3   | 59   | 16194 | 42   | 19.67676 | 0.000472 |
| blue        | 9316  | GSE22886_NAIVE_VS_MEMORY_TCELL_UP             | 51  | 178  | 16075 | 2978 | 1.56372  | 0.000472 |
| purple      | 3563  | MODULE_75                                     | 11  | 340  | 15913 | 157  | 3.349251 | 0.000473 |
| turquoise   | 9295  | GSE20715_0H_VS_6H_OZONE_TLR4_KO_LUNG_DN       | 66  | 178  | 16075 | 4169 | 1.445525 | 0.000473 |
| turquoise   | 9771  | GSE339_CD4POS_VS_CD4CD8DN_DC_DN               | 66  | 178  | 16075 | 4169 | 1.445525 | 0.000473 |
| red         | 6298  | HALMOS_CEBPA_TARGETS_UP                       | 7   | 44   | 16209 | 524  | 4.934551 | 0.000473 |
| red         | 8719  | GSE14769_UNSTIM_VS_60MIN_LPS_BMDM_DN          | 16  | 191  | 16062 | 524  | 2.598297 | 0.000473 |
| turquoise   | 9759  | GSE32423_IL7_VS_IL7_IL4_NAIVE_CD8_TCELL_DN    | 70  | 191  | 16062 | 4169 | 1.428783 | 0.000477 |
| turquoise   | 10206 | GSE7852_LN_VS_FAT_TCONV_UP                    | 70  | 191  | 16062 | 4169 | 1.428783 | 0.000477 |
| pink        | 6243  | ADDYA_ERYTHROID_DIFFERENTIATION_BY_HEMIN      | 6   | 71   | 16182 | 228  | 6.024092 | 0.000478 |

|             |                                                      |     |      |       |      |          |          |
|-------------|------------------------------------------------------|-----|------|-------|------|----------|----------|
| lightcyan   | 7869 LU_EZH2_TARGETS_UP                              | 6   | 262  | 15991 | 62   | 6.003324 | 0.000478 |
| cyan        | 3611 MODULE_123                                      | 6   | 210  | 16043 | 77   | 6.030798 | 0.000479 |
| yellow      | 9326 GSE22886_CD4_TCELL_VS_BCELL_NAIVE_UP            | 32  | 197  | 16056 | 1426 | 1.851389 | 0.000484 |
| yellow      | 6697 ABE_INNER_EAR                                   | 11  | 40   | 16213 | 1426 | 3.134344 | 0.000484 |
| purple      | 6203 MANALO_HYPOXIA_UP                               | 8   | 188  | 16065 | 157  | 4.405204 | 0.000487 |
| purple      | 9894 GSE36392_TYPE_2_MYELOID_VS_NEUTROPHIL_IL25_TI   | 8   | 188  | 16065 | 157  | 4.405204 | 0.000487 |
| turquoise   | 2338 MORF_SOD1                                       | 96  | 277  | 15976 | 4169 | 1.351117 | 0.000489 |
| turquoise   | 6940 WONG_MITOCHONDRIA_GENE_MODULE                   | 77  | 214  | 16039 | 4169 | 1.402745 | 0.000489 |
| red         | 6788 BILD_HRAS_ONCOGENIC_SIGNATURE                   | 18  | 230  | 16023 | 524  | 2.427431 | 0.00049  |
| magenta     | 6130 TARTE_PLASMA_CELL_VS_B_LYMPHOCYTE_DN            | 4   | 36   | 16217 | 167  | 10.81371 | 0.00049  |
| red         | 7844 STAMBOLSKY_RESPONSE_TO_VITAMIN_D3_UP            | 9   | 72   | 16181 | 524  | 3.877147 | 0.000491 |
| lightyellow | 5045 TONKS_TARGETS_OF_RUNX1_RUNX1T1_FUSION_HSC_      | 4   | 183  | 16070 | 33   | 10.76536 | 0.000493 |
| lightyellow | 8369 KRAS.600.LUNG.BREAST_UP.V1_UP                   | 4   | 183  | 16070 | 33   | 10.76536 | 0.000493 |
| blue        | 2310 MORF_HAT1                                       | 50  | 174  | 16079 | 2978 | 1.568302 | 0.000496 |
| blue        | 1885 V\$AP2_Q3                                       | 58  | 209  | 16044 | 2978 | 1.514574 | 0.000496 |
| cyan        | 6158 BROCKE_APOPTOSIS_REVERSED_BY_IL6                | 5   | 138  | 16115 | 77   | 7.647751 | 0.000497 |
| turquoise   | 8864 GSE17721_CTRL_VS_PAM3CSK4_0.5H_BMDM_UP          | 69  | 188  | 16065 | 4169 | 1.430846 | 0.000497 |
| salmon      | 9890 GSE36392_TYPE_2_MYELOID_VS_EOSINOPHIL_IL25_TR   | 7   | 178  | 16075 | 127  | 5.032779 | 0.000498 |
| blue        | 944 TRANSCRIPTION_FROM_RNA_POLYMERASE_II_PROMC       | 99  | 396  | 15857 | 2978 | 1.364422 | 0.000498 |
| purple      | 356 CELL_SURFACE_RECEPTOR_LINKED_SIGNAL_TRANSDUC     | 13  | 457  | 15796 | 157  | 2.944835 | 0.000499 |
| turquoise   | 896 CENTROSOME_CYCLE                                 | 8   | 10   | 16243 | 4169 | 3.118829 | 0.000501 |
| red         | 8927 GSE17721_LPS_VS_POLYIC_16H_BMDM_DN              | 16  | 192  | 16061 | 524  | 2.584765 | 0.000501 |
| red         | 10103 GSE39820_CTRL_VS_IL1B_IL6_IL23A_CD4_TCELL_DN   | 16  | 192  | 16061 | 524  | 2.584765 | 0.000501 |
| turquoise   | 2032 GTGACTT,MIR-224                                 | 54  | 140  | 16113 | 4169 | 1.503721 | 0.000503 |
| cyan        | 6623 HAN_JNK_SINGALING_UP                            | 3   | 33   | 16220 | 77   | 19.1889  | 0.000504 |
| cyan        | 7816 BROWNE_HCMV_INFECTION_2HR_UP                    | 3   | 33   | 16220 | 77   | 19.1889  | 0.000504 |
| purple      | 6621 GEORGANTAS_HSC_MARKERS                          | 5   | 68   | 16185 | 157  | 7.611933 | 0.000504 |
| brown       | 1025 APOPTOSIS_GO                                    | 76  | 390  | 15863 | 2190 | 1.446233 | 0.000506 |
| salmon      | 599 RIBONUCLEOPROTEIN_COMPLEX_BIOGENESIS_AND_AS      | 5   | 84   | 16169 | 127  | 7.617642 | 0.000507 |
| brown       | 9806 GSE360_CTRL_VS_L_MAJOR_MAC_UP                   | 42  | 187  | 16066 | 2190 | 1.666852 | 0.000508 |
| cyan        | 7373 HINATA_NFKB_TARGETS_KERATINOCYTE_UP             | 4   | 78   | 16175 | 77   | 10.82451 | 0.000509 |
| blue        | 5048 TONKS_TARGETS_OF_RUNX1_RUNX1T1_FUSION_MON       | 55  | 196  | 16057 | 2978 | 1.531495 | 0.00051  |
| blue        | 5987 KAUFFMANN_DNA_REPAIR_GENES                      | 62  | 227  | 16026 | 2978 | 1.490647 | 0.000513 |
| cyan        | 6890 FOSTER_TOLERANT_MACROPHAGE_DN                   | 8   | 391  | 15862 | 77   | 4.31873  | 0.000516 |
| pink        | 4631 REACTOME_FACTORS_INVOLVED_IN_MEGAKARYOCYTI      | 7   | 100  | 16153 | 228  | 4.989956 | 0.000517 |
| turquoise   | 8614 GSE14000_UNSTIM_VS_4H_LPS_DC_TRANSLATED_RNA     | 72  | 198  | 16055 | 4169 | 1.41765  | 0.000518 |
| turquoise   | 9393 GSE22886_NAIVE_CD4_TCELL_VS_48H_ACT_TH1_DN      | 72  | 198  | 16055 | 4169 | 1.41765  | 0.000518 |
| turquoise   | 10114 GSE39820_TGFBETA1_IL6_VS_TGFBETA1_IL6_IL23A_TF | 72  | 198  | 16055 | 4169 | 1.41765  | 0.000518 |
| turquoise   | 10148 GSE7400_CTRL_VS_CSF3_IN_VIVO_TREATED_PBMCI     | 72  | 198  | 16055 | 4169 | 1.41765  | 0.000518 |
| magenta     | 4152 REACTOME_DEVELOPMENTAL_BIOLOGY                  | 11  | 323  | 15930 | 167  | 3.314418 | 0.000519 |
| blue        | 2396 MORF_G22P1                                      | 49  | 170  | 16083 | 2978 | 1.573099 | 0.00052  |
| brown       | 6537 BLALOCK_ALZHEIMERS_DISEASE_UP                   | 250 | 1535 | 14718 | 2190 | 1.208707 | 0.00052  |
| purple      | 9420 GSE24142_EARLY_THYMIC_PROGENITOR_VS_DN2_THY     | 8   | 190  | 16063 | 157  | 4.358833 | 0.000522 |
| lightyellow | 6115 SANA_TNF_SIGNALING_DN                           | 3   | 78   | 16175 | 33   | 18.94289 | 0.000523 |
| greenyellow | 8387 KAECH_NAIVE_VS_DAY8_EFF_CD8_TCELL_DN            | 8   | 199  | 16054 | 150  | 4.355913 | 0.000524 |
| brown       | 8457 GSE11057_NAIVE_VS_MEMORY_CD4_TCELL_DN           | 43  | 193  | 16060 | 2190 | 1.653486 | 0.000525 |
| red         | 7177 PODAR_RESPONSE_TO_ADAPHOSTIN_UP                 | 13  | 138  | 16115 | 524  | 2.921908 | 0.000525 |
| brown       | 7408 ZHANG_TLX_TARGETS_60HR_UP                       | 57  | 275  | 15978 | 2190 | 1.538267 | 0.000525 |
| turquoise   | 2015 AAAGGAT,MIR-501                                 | 44  | 109  | 16144 | 4169 | 1.573721 | 0.000525 |
| brown       | 4116 PID_FAK_PATHWAY                                 | 18  | 59   | 16194 | 2190 | 2.264175 | 0.000531 |
| red         | 9447 GSE24634_TREG_VS_TCONV_POST_DAY10_IL4_CONVE     | 16  | 193  | 16060 | 524  | 2.571372 | 0.000531 |
| cyan        | 6792 DOUGLAS_BMI1_TARGETS_DN                         | 7   | 299  | 15954 | 77   | 4.941624 | 0.000532 |
| lightyellow | 8139 GENTLES_LEUKEMIC_STEM_CELL_DN                   | 2   | 17   | 16236 | 33   | 57.94296 | 0.000533 |
| blue        | 2165 CAGCAGG,MIR-370                                 | 41  | 136  | 16117 | 2978 | 1.645333 | 0.000535 |
| lightcyan   | 6033 ONDER_CDH1_TARGETS_2_DN                         | 7   | 374  | 15879 | 62   | 4.90646  | 0.000535 |
| blue        | 9378 GSE22886_NAIVE_CD4_TCELL_VS_DC_UP               | 54  | 192  | 16061 | 2978 | 1.534975 | 0.000537 |
| lightcyan   | 3617 MODULE_129                                      | 5   | 175  | 16078 | 62   | 7.489862 | 0.000539 |
| lightcyan   | 9195 GSE17974_IL4_AND_ANTI_IL12_VS_UNTREATED_6H_A    | 5   | 175  | 16078 | 62   | 7.489862 | 0.000539 |
| purple      | 8455 GSE11057_CD4_CENT_MEM_VS_PBMCI                  | 8   | 191  | 16062 | 157  | 4.336012 | 0.000541 |
| turquoise   | 9686 GSE29618_PRE_VS_DAY7_POST_LAIV_FLU_VACCINE_B    | 67  | 182  | 16071 | 4169 | 1.435176 | 0.000541 |

|             |                                                    |     |      |       |      |          |          |
|-------------|----------------------------------------------------|-----|------|-------|------|----------|----------|
| turquoise   | 9805 GSE360_CTRL_VS_L_DONOVANI_MAC_DN              | 67  | 182  | 16071 | 4169 | 1.435176 | 0.000541 |
| blue        | 854 REGULATION_OF_METABOLIC_PROCESS                | 164 | 708  | 15545 | 2978 | 1.264211 | 0.000542 |
| pink        | 9056 GSE17721_POLYIC_VS_GARDIQUIMOD_0.5H_BMDM_L    | 9   | 165  | 16088 | 228  | 3.888278 | 0.000542 |
| greenyello  | 2845 KEGG_NATURAL_KILLER_CELL_MEDIATED_CYTOTOXICIT | 6   | 110  | 16143 | 150  | 5.910182 | 0.000544 |
| blue        | 4442 REACTOME_TRANSCRIPTION                        | 51  | 179  | 16074 | 2978 | 1.554984 | 0.000545 |
| lightgreen  | 5709 FURUKAWA_DUSP6_TARGETS_PCI35_UP               | 3   | 62   | 16191 | 42   | 18.72465 | 0.000546 |
| greenyello  | 931 RESPONSE_TO_WOUNDING                           | 7   | 153  | 16100 | 150  | 4.957342 | 0.000546 |
| purple      | 2268 TGGAAA_V\$NFAT_Q4_01                          | 28  | 1506 | 14747 | 157  | 1.924717 | 0.000546 |
| lightcyan   | 3660 MODULE_177                                    | 4   | 99   | 16154 | 62   | 10.59172 | 0.000551 |
| lightcyan   | 8961 GSE17721_PAM3CSK4_VS_CPG_12H_BMDM_DN          | 5   | 176  | 16077 | 62   | 7.447306 | 0.000553 |
| lightcyan   | 8974 GSE17721_CPG_VS_GARDIQUIMOD_6H_BMDM_UP        | 5   | 176  | 16077 | 62   | 7.447306 | 0.000553 |
| lightcyan   | 9042 GSE17721_LPS_VS_CPG_2H_BMDM_UP                | 5   | 176  | 16077 | 62   | 7.447306 | 0.000553 |
| red         | 8477 GSE11864_CSF1_IFNG_VS_CSF1_IFNG_PAM3CYS_IN_M  | 15  | 175  | 16078 | 524  | 2.658615 | 0.000554 |
| brown       | 5657 GRUETZMANN_PANCREATIC_CANCER_UP               | 67  | 336  | 15917 | 2190 | 1.479875 | 0.000558 |
| salmon      | 8156 HOLLEMAN_ASPARAGINASE_RESISTANCE_ALL_UP       | 3   | 21   | 16232 | 127  | 18.28234 | 0.000559 |
| blue        | 2679 GNF2_PA2G4                                    | 27  | 79   | 16174 | 2978 | 1.865286 | 0.00056  |
| purple      | 3606 MODULE_118                                    | 11  | 347  | 15906 | 157  | 3.281687 | 0.00056  |
| red         | 7144 BOQUEST_STEM_CELL_DN                          | 16  | 194  | 16059 | 524  | 2.558118 | 0.000562 |
| turquoise   | 4718 REACTOME_MYD88_MAL_CASCADE_INITIATED_ON_PL    | 34  | 79   | 16174 | 4169 | 1.677851 | 0.000563 |
| lightyellow | 5908 BENPORATH_PRC2_TARGETS                        | 5   | 339  | 15914 | 33   | 7.264235 | 0.000563 |
| brown       | 4151 REACTOME_SIGNALING_BY_SCF_KIT                 | 21  | 74   | 16179 | 2190 | 2.10609  | 0.000564 |
| turquoise   | 9262 GSE20366_EX_VIVO_VS_DEC205_CONVERSION_UP      | 70  | 192  | 16061 | 4169 | 1.421342 | 0.000565 |
| magenta     | 3503 MODULE_11                                     | 13  | 435  | 15818 | 167  | 2.908514 | 0.000566 |
| turquoise   | 2440 MORF_PPP2R5E                                  | 35  | 82   | 16171 | 4169 | 1.66401  | 0.000566 |
| turquoise   | 1463 V\$ELK1_01                                    | 87  | 248  | 16005 | 4169 | 1.367632 | 0.000566 |
| blue        | 2384 MORF_EIF4E                                    | 28  | 83   | 16170 | 2978 | 1.841148 | 0.000567 |
| lightcyan   | 9296 GSE20715_0H_VS_24H_OZONE_TLR4_KO_LUNG_UP      | 5   | 177  | 16076 | 62   | 7.405231 | 0.000567 |
| turquoise   | 2114 AACATTC,MIR-409-3P                            | 50  | 128  | 16125 | 4169 | 1.522866 | 0.000567 |
| greenyello  | 5736 THEODOROU_MAMMARY_TUMORIGENESIS               | 3   | 18   | 16235 | 150  | 18.05889 | 0.000568 |
| salmon      | 9654 GSE29618_BCELL_VS_MONOCYTE_UP                 | 7   | 182  | 16071 | 127  | 4.922168 | 0.000568 |
| brown       | 9858 GSE360_LOW_DOSE_B_MALAYI_VS_M_TUBERCULOSIS    | 42  | 188  | 16065 | 2190 | 1.657986 | 0.00057  |
| cyan        | 5149 GOZGIT_ESR1_TARGETS_DN                        | 10  | 608  | 15645 | 77   | 3.471676 | 0.000572 |
| blue        | 1369 TRANSCRIPTION_FACTOR_BINDING                  | 74  | 282  | 15971 | 2978 | 1.43216  | 0.000574 |
| salmon      | 4723 REACTOME_SCF_BETA_TRCP_MEDIATED_DEGRADATIO    | 4   | 49   | 16204 | 127  | 10.44705 | 0.000574 |
| brown       | 2642 GNF2_FGR                                      | 12  | 32   | 16221 | 2190 | 2.783048 | 0.000574 |
| brown       | 3037 BIOCARTA_PDGF_PATHWAY                         | 12  | 32   | 16221 | 2190 | 2.783048 | 0.000574 |
| brown       | 2817 KEGG_ENDOCYTOSIS                              | 39  | 171  | 16082 | 2190 | 1.692614 | 0.000576 |
| purple      | 3626 MODULE_138                                    | 5   | 70   | 16183 | 157  | 7.394449 | 0.000576 |
| purple      | 8056 PEDERSEN_TARGETS_OF_611CTF_ISOFORM_OF_ERBB2   | 5   | 70   | 16183 | 157  | 7.394449 | 0.000576 |
| lightyellow | 5013 TAKEDA_TARGETS_OF_NUP98_HOXA9_FUSION_8D_DN    | 4   | 191  | 16062 | 33   | 10.31445 | 0.000579 |
| lightcyan   | 5173 ENK_UV_RESPONSE_EPIDERMIS_UP                  | 6   | 272  | 15981 | 62   | 5.782614 | 0.000583 |
| turquoise   | 2158 AACTAC,MIR-142-3P                             | 49  | 125  | 16128 | 4169 | 1.528226 | 0.000583 |
| greenyello  | 41 INTRINSIC_TO_MEMBRANE                           | 21  | 1041 | 15212 | 150  | 2.185802 | 0.000584 |
| lightyellow | 3748 MODULE_289                                    | 3   | 81   | 16172 | 33   | 18.2413  | 0.000584 |
| purple      | 6532 KUNINGER_IGF1_VS_PDGF_TARGETS_DN              | 4   | 40   | 16213 | 157  | 10.35223 | 0.000584 |
| salmon      | 9950 GSE3982_CTRL_VS_IGE_STIM_MAST_CELL_UP         | 7   | 183  | 16070 | 127  | 4.895271 | 0.000587 |
| purple      | 4909 CASORELLI_ACUTE_PROMYELOCYTIC_LEUKEMIA_DN     | 16  | 653  | 15600 | 157  | 2.536534 | 0.000589 |
| turquoise   | 8529 GSE13229_MATURE_VS_INTMATURE_NKCELL_DN        | 69  | 189  | 16064 | 4169 | 1.423275 | 0.00059  |
| turquoise   | 9131 GSE17721_0.5H_VS_8H_CPG_BMDM_DN               | 69  | 189  | 16064 | 4169 | 1.423275 | 0.00059  |
| turquoise   | 9468 GSE25087_TREG_VS_TCONV_FETUS_UP               | 69  | 189  | 16064 | 4169 | 1.423275 | 0.00059  |
| turquoise   | 1525 V\$NRF2_01                                    | 92  | 265  | 15988 | 4169 | 1.353454 | 0.000593 |
| brown       | 4048 PID_ECADHERIN_KERATINOCYTE_PATHWAY            | 9   | 20   | 16233 | 2190 | 3.339658 | 0.000594 |
| red         | 8401 GOLDRATH_NAIVE_VS_MEMORY_CD8_TCELL_DN         | 16  | 195  | 16058 | 524  | 2.544999 | 0.000594 |
| brown       | 4583 REACTOME_SIGNALING_BY_ILS                     | 26  | 100  | 16153 | 2190 | 1.92958  | 0.000595 |
| blue        | 8504 GSE12845_IGD_POS_VS_NEG_BLOOD_BCELL_UP        | 52  | 184  | 16069 | 2978 | 1.542391 | 0.000596 |
| blue        | 10029 GSE3982_DC_VS_TH2_DN                         | 52  | 184  | 16069 | 2978 | 1.542391 | 0.000596 |
| lightcyan   | 9842 GSE360_L_MAJOR_VS_B_MALAYI_HIGH_DOSE_DC_UP    | 5   | 179  | 16074 | 62   | 7.322491 | 0.000597 |
| turquoise   | 2174 GTAAACC,MIR-299-5P                            | 21  | 42   | 16211 | 4169 | 1.949268 | 0.000599 |
| blue        | 69 NUCLEAR_LUMEN                                   | 93  | 370  | 15883 | 2978 | 1.371798 | 0.0006   |
| red         | 7350 RUTELLA_RESPONSE_TO_HGF_DN                    | 18  | 234  | 16019 | 524  | 2.385937 | 0.000601 |

|             |                                                   |     |     |       |      |          |          |
|-------------|---------------------------------------------------|-----|-----|-------|------|----------|----------|
| purple      | 3516 MODULE_24                                    | 11  | 350 | 15903 | 157  | 3.253558 | 0.000601 |
| purple      | 5063 ODONNELL_TFRC_TARGETS_UP                     | 11  | 350 | 15903 | 157  | 3.253558 | 0.000601 |
| red         | 5697 HASINA_NOL7_TARGETS_UP                       | 4   | 13  | 16240 | 524  | 9.543746 | 0.000606 |
| salmon      | 9666 GSE29618_BCELL_VS_MONOCYTE_DAY7_FLU_VACCINE  | 7   | 184 | 16069 | 127  | 4.868667 | 0.000606 |
| salmon      | 9792 GSE360_CTRL_VS_L_DONOVANI_DC_UP              | 7   | 184 | 16069 | 127  | 4.868667 | 0.000606 |
| blue        | 3771 MODULE_318                                   | 13  | 28  | 16225 | 2978 | 2.533927 | 0.000607 |
| turquoise   | 9351 GSE22886_DAY1_VS_DAY7_MONOCYTE_IN_CULTURE_   | 72  | 199 | 16054 | 4169 | 1.410526 | 0.000611 |
| brown       | 3015 BIOCARTA_PYK2_PATHWAY                        | 11  | 28  | 16225 | 2190 | 2.915574 | 0.000612 |
| red         | 4890 FULCHER_INFLAMMATORY_RESPONSE_LLECTIN_VS_LPS | 33  | 558 | 15695 | 524  | 1.834349 | 0.000613 |
| magenta     | 1492 V\$TAL1BETAE47_01                            | 8   | 183 | 16070 | 167  | 4.254573 | 0.000613 |
| magenta     | 9651 GSE29617_CTRL_VS_DAY7_TIV_FLU_VACCINE_PBMC_2 | 8   | 183 | 16070 | 167  | 4.254573 | 0.000613 |
| greenyello  | 8764 GSE15733_BM_VS_SPLEEN_MEMORY_CD4_TCELL_UP    | 7   | 156 | 16097 | 150  | 4.862009 | 0.000613 |
| blue        | 9390 GSE22886_NAIVE_CD4_TCELL_VS_12H_ACT_TH1_UP   | 54  | 193 | 16060 | 2978 | 1.527022 | 0.000615 |
| blue        | 7643 FOURNIER_ACINAR_DEVELOPMENT_LATE_2           | 71  | 269 | 15984 | 2978 | 1.440505 | 0.000615 |
| brown       | 3572 MODULE_84                                    | 90  | 480 | 15773 | 2190 | 1.391524 | 0.000616 |
| red         | 459 DEFENSE_RESPONSE                              | 17  | 215 | 16038 | 524  | 2.452521 | 0.000619 |
| purple      | 1608 V\$TATA_C                                    | 8   | 195 | 16058 | 157  | 4.247068 | 0.00062  |
| brown       | 9978 GSE3982_EOSINOPHIL_VS_BCELL_UP               | 38  | 166 | 16087 | 2190 | 1.698889 | 0.000624 |
| red         | 6730 SESTO_RESPONSE_TO_UV_C5                      | 7   | 46  | 16207 | 524  | 4.720005 | 0.000625 |
| blue        | 2024 TCCCCAC,MIR-491                              | 19  | 49  | 16204 | 2978 | 2.116247 | 0.000627 |
| blue        | 2399 MORF_GSPT1                                   | 19  | 49  | 16204 | 2978 | 2.116247 | 0.000627 |
| red         | 9934 GSE37416_0H_VS_3H_F_TULARENSIS_LVS_NEUTROPH  | 16  | 196 | 16057 | 524  | 2.532014 | 0.000628 |
| red         | 10192 GSE7852_TREG_VS_TCONV_LN_UP                 | 16  | 196 | 16057 | 524  | 2.532014 | 0.000628 |
| blue        | 960 CATABOLIC_PROCESS                             | 56  | 202 | 16051 | 2978 | 1.513023 | 0.000631 |
| brown       | 8000 FEVR_CTNNB1_TARGETS_UP                       | 106 | 582 | 15671 | 2190 | 1.351675 | 0.000631 |
| blue        | 10025 GSE3982_DC_VS_NKCELL_DN                     | 48  | 167 | 16086 | 2978 | 1.568677 | 0.000631 |
| green       | 3846 MODULE_426                                   | 14  | 66  | 16187 | 1305 | 2.641844 | 0.000634 |
| turquoise   | 8132 PECE_MAMMARY_STEM_CELL_UP                    | 53  | 138 | 16115 | 4169 | 1.497264 | 0.000635 |
| brown       | 3992 PID_TXA2PATHWAY                              | 17  | 55  | 16198 | 2190 | 2.293906 | 0.000636 |
| yellow      | 2871 KEGG_PARKINSONS_DISEASE                      | 20  | 104 | 16149 | 1426 | 2.191849 | 0.000636 |
| turquoise   | 7740 YAO_TEMPORAL_RESPONSE_TO_PROGESTERONE_CLU:   | 63  | 170 | 16083 | 4169 | 1.444752 | 0.000637 |
| lightyellow | 10074 GSE3982_BASOPHIL_VS_CENT_MEMORY_CD4_TCELL_U | 4   | 196 | 16057 | 33   | 10.05133 | 0.000638 |
| brown       | 10016 GSE3982_DC_VS_BCELL_UP                      | 42  | 189 | 16064 | 2190 | 1.649214 | 0.00064  |
| purple      | 1723 V\$STAT5B_01                                 | 8   | 196 | 16057 | 157  | 4.2254   | 0.000641 |
| purple      | 3852 MODULE_433                                   | 4   | 41  | 16212 | 157  | 10.09974 | 0.000643 |
| purple      | 6465 MCDOWELL_ACUTE_LUNG_INJURY_UP                | 4   | 41  | 16212 | 157  | 10.09974 | 0.000643 |
| salmon      | 3442 chr17p12                                     | 3   | 22  | 16231 | 127  | 17.45132 | 0.000644 |
| pink        | 1542 V\$GATA1_04                                  | 9   | 169 | 16084 | 228  | 3.796247 | 0.000644 |
| turquoise   | 2128 GTTAAAG,MIR-302B                             | 27  | 59  | 16194 | 4169 | 1.784076 | 0.000645 |
| turquoise   | 2085 ATACCTC,MIR-202                              | 58  | 154 | 16099 | 4169 | 1.46828  | 0.000645 |
| purple      | 6978 IWANAGA_CARCIANOGENESIS_BY_KRAS_PTEN_DN      | 10  | 298 | 15955 | 157  | 3.473902 | 0.000646 |
| salmon      | 5677 KIM_MYC_AMPLIFICATION_TARGETS_UP             | 7   | 186 | 16067 | 127  | 4.816315 | 0.000647 |
| salmon      | 7220 ALONSO_METASTASIS_UP                         | 7   | 186 | 16067 | 127  | 4.816315 | 0.000647 |
| greenyello  | 2224 YNTTTNNANGCARM_UNKNOWN                       | 4   | 43  | 16210 | 150  | 10.07938 | 0.00065  |
| brown       | 320 REGULATION_OF_CYTOKINE_SECRETION              | 7   | 13  | 16240 | 2190 | 3.996171 | 0.000651 |
| magenta     | 607 EXTRACELLULAR_STRUCTURE_ORGANIZATION_AND_BI   | 3   | 17  | 16236 | 167  | 17.17471 | 0.000652 |
| pink        | 9240 GSE18791_UNSTIM_VS_NEWCATSLE_VIRUS_DC_2H_UI  | 7   | 104 | 16149 | 228  | 4.798035 | 0.000654 |
| red         | 694 PROTEIN_KINASE_CASCADE                        | 20  | 276 | 15977 | 524  | 2.247621 | 0.000654 |
| purple      | 7945 KIM_GLIS2_TARGETS_UP                         | 5   | 72  | 16181 | 157  | 7.189048 | 0.000656 |
| greenyello  | 2227 YTAAYNGCT_UNKNOWN                            | 6   | 114 | 16139 | 150  | 5.702807 | 0.000658 |
| brown       | 7456 MILI_PSEUDOPODIA_HAPTOTAXIS_DN               | 116 | 647 | 15606 | 2190 | 1.330587 | 0.000659 |
| purple      | 6642 ZHU_CMV_ALL_DN                               | 6   | 109 | 16144 | 157  | 5.698475 | 0.000659 |
| red         | 8344 STK33_DN                                     | 19  | 256 | 15997 | 524  | 2.302056 | 0.000664 |
| magenta     | 13 PROTEINACEOUS_EXTRACELLULAR_MATRIX             | 5   | 68  | 16185 | 167  | 7.156129 | 0.000667 |
| blue        | 5743 PUJANA_BRCA2_PCC_NETWORK                     | 103 | 418 | 15835 | 2978 | 1.344837 | 0.000667 |
| salmon      | 9032 GSE17721_PAM3CSK4_VS_GADIQUIMOD_12H_BMDM     | 7   | 187 | 16066 | 127  | 4.79056  | 0.000667 |
| turquoise   | 9117 GSE17721_0.5H_VS_4H_PAM3CSK4_BMDM_DN         | 66  | 180 | 16073 | 4169 | 1.429464 | 0.00067  |
| magenta     | 7885 FIGUEROA_AML_METHYLATION_CLUSTER_4_UP        | 6   | 103 | 16150 | 167  | 5.669322 | 0.000676 |
| blue        | 1087 DNA_HELICASE_ACTIVITY                        | 12  | 25  | 16228 | 2978 | 2.619691 | 0.000677 |
| blue        | 706 MRNA_PROCESSING_GO_0006397                    | 25  | 72  | 16181 | 2978 | 1.895031 | 0.000677 |



|            |                                                    |     |     |       |      |          |          |
|------------|----------------------------------------------------|-----|-----|-------|------|----------|----------|
| pink       | 6773 DAZARD_UV_RESPONSE_CLUSTER_G2                 | 4   | 29  | 16224 | 228  | 9.832426 | 0.00068  |
| brown      | 7311 LINDSTEDT_DENDRITIC_CELL_MATURATION_C         | 19  | 65  | 16188 | 2190 | 2.16935  | 0.000681 |
| tan        | 1127 OXIDOREDUCTASE_ACTIVITY_GO_0016616            | 4   | 45  | 16208 | 145  | 9.963525 | 0.000682 |
| magenta    | 8516 GSE12845_IGD_NEG_BLOOD_VS_DARKZONE_GC_TONS    | 8   | 186 | 16067 | 167  | 4.185951 | 0.000682 |
| blue       | 6118 PENG_LEUCINE_DEPRIVATION_DN                   | 52  | 185 | 16068 | 2978 | 1.534053 | 0.000684 |
| brown      | 7864 WANG_RESPONSE_TO_GSK3_INHIBITOR_SB216763_UP   | 71  | 363 | 15890 | 2190 | 1.451581 | 0.000684 |
| red        | 8218 AKT_UP_MTOR_DN.V1_UP                          | 14  | 160 | 16093 | 524  | 2.714003 | 0.000684 |
| magenta    | 998 ORGAN_DEVELOPMENT                              | 12  | 388 | 15865 | 167  | 3.010001 | 0.000684 |
| cyan       | 8115 PHONG_TNF_RESPONSE_NOT_VIA_P38                | 7   | 312 | 15941 | 77   | 4.735723 | 0.000684 |
| brown      | 6629 MCCLUNG_CREB1_TARGETS_UP                      | 21  | 75  | 16178 | 2190 | 2.078009 | 0.000685 |
| lightgreen | 1443 CYTOKINE_ACTIVITY                             | 3   | 67  | 16186 | 42   | 17.32729 | 0.000685 |
| salmon     | 9649 GSE29617_CTRL_VS_DAY3_TIV_FLU_VACCINE_PBMC_2  | 7   | 188 | 16065 | 127  | 4.765078 | 0.000689 |
| blue       | 4355 REACTOME_P75_NTR_RECEPTOR_MEDIATED_SIGNALLI   | 26  | 76  | 16177 | 2978 | 1.867104 | 0.000691 |
| turquoise  | 8124 RAO_BOUND_BY_SALL4_ISOFORM_B                  | 138 | 423 | 15830 | 4169 | 1.271863 | 0.000692 |
| lightcyan  | 8734 GSE15324_NAIVE_VS_ACTIVATED_CD8_TCELL_UP      | 5   | 185 | 16068 | 62   | 7.085004 | 0.000693 |
| lightcyan  | 8891 GSE17721_CTRL_VS_CPG_8H_BMDM_DN               | 5   | 185 | 16068 | 62   | 7.085004 | 0.000693 |
| lightcyan  | 6890 FOSTER_TOLERANT_MACROPHAGE_DN                 | 7   | 391 | 15862 | 62   | 4.693136 | 0.000696 |
| turquoise  | 6681 DAZARD_RESPONSE_TO_UV_NHEK_DN                 | 105 | 310 | 15943 | 4169 | 1.320472 | 0.000698 |
| purple     | 6247 HADDAD_T_LYMPHOCYTE_AND_NK_PROGENITOR_UP      | 5   | 73  | 16180 | 157  | 7.090568 | 0.000698 |
| brown      | 2297 MORF_BECN1                                    | 26  | 101 | 16152 | 2190 | 1.910475 | 0.000701 |
| yellow     | 6006 NIKOLSKY_BREAST_CANCER_16Q24_AMPLICON         | 12  | 48  | 16205 | 1426 | 2.849404 | 0.000701 |
| blue       | 9451 GSE24634_TEFF_VS_TCONV_DAY5_IN_CULTURE_DN     | 54  | 194 | 16059 | 2978 | 1.519151 | 0.000703 |
| purple     | 3727 MODULE_259                                    | 4   | 42  | 16211 | 157  | 9.859266 | 0.000705 |
| cyan       | 6135 FLECHNER_BIOPSY_KIDNEY_TRANSPLANT_REJECTED_V. | 4   | 85  | 16168 | 77   | 9.933079 | 0.000705 |
| cyan       | 6988 FUJII_YBX1_TARGETS_UP                         | 3   | 37  | 16216 | 77   | 17.11443 | 0.000707 |
| turquoise  | 3579 MODULE_91                                     | 19  | 37  | 16216 | 4169 | 2.001951 | 0.000709 |
| magenta    | 3865 MODULE_456                                    | 6   | 104 | 16149 | 167  | 5.614809 | 0.000711 |
| purple     | 7204 QI_PLASMACYTOMA_UP                            | 9   | 249 | 16004 | 157  | 3.74177  | 0.000712 |
| greenyello | 9716 GSE30083_SP2_VS_SP3_THYMOCYTE_UP              | 7   | 160 | 16093 | 150  | 4.740458 | 0.000713 |
| magenta    | 191 EXTRACELLULAR_MATRIX                           | 5   | 69  | 16184 | 167  | 7.052417 | 0.000713 |
| red        | 3605 MODULE_117                                    | 29  | 472 | 15781 | 524  | 1.905716 | 0.000714 |
| red        | 2695 GNF2_SELL                                     | 7   | 47  | 16206 | 524  | 4.619579 | 0.000715 |
| purple     | 3504 MODULE_12                                     | 10  | 302 | 15951 | 157  | 3.42789  | 0.000715 |
| brown      | 9808 GSE360_CTRL_VS_T_GONDII_MAC_UP                | 42  | 190 | 16063 | 2190 | 1.640534 | 0.000716 |
| salmon     | 5507 SCHLOSSER_SERUM_RESPONSE_DN                   | 14  | 667 | 15586 | 127  | 2.686161 | 0.000718 |
| turquoise  | 9643 GSE29615_DAY3_VS_DAY7_LAIV_FLU_VACCINE_PBMC.  | 60  | 161 | 16092 | 4169 | 1.452871 | 0.000719 |
| turquoise  | 5034 MULLIGHAN_NPM1_MUTATED_SIGNATURE_2_UP         | 49  | 126 | 16127 | 4169 | 1.516098 | 0.00072  |
| turquoise  | 4161 REACTOME_TRIF_MEDIATED_TLR3_SIGNALING         | 31  | 71  | 16182 | 4169 | 1.702178 | 0.000722 |
| greenyello | 1920 V\$NFAT_Q4_01                                 | 8   | 209 | 16044 | 150  | 4.147496 | 0.000723 |
| cyan       | 7417 COLINA_TARGETS_OF_4EBP1_AND_4EBP2             | 7   | 315 | 15938 | 77   | 4.69062  | 0.000724 |
| lightcyan  | 8563 GSE13484_UNSTIM_VS_3H_YF17D_VACCINE_STIM_PB   | 5   | 187 | 16066 | 62   | 7.009229 | 0.000727 |
| lightcyan  | 9865 GSE360_L_DONOVANI_VS_B_MALAYI_HIGH_DOSE_MA    | 5   | 187 | 16066 | 62   | 7.009229 | 0.000727 |
| turquoise  | 9566 GSE27786_BCELL_VS_NKCELL_UP                   | 68  | 187 | 16066 | 4169 | 1.41765  | 0.000728 |
| blue       | 5386 LASTOWSKA_NEUROBLASTOMA_COPY_NUMBER_DN        | 178 | 781 | 15472 | 2978 | 1.243878 | 0.000729 |
| turquoise  | 8755 GSE15659_CD45RA_NEG_CD4_TCELL_VS_NONSUPPRE:   | 64  | 174 | 16079 | 4169 | 1.433945 | 0.000729 |
| lightgreen | 7061 SMID_BREAST_CANCER_LUMINAL_B_DN               | 6   | 425 | 15828 | 42   | 5.463193 | 0.000729 |
| pink       | 8323 RPS14_DN.V1_DN                                | 9   | 172 | 16081 | 228  | 3.730034 | 0.000731 |
| brown      | 2284 TCANNTGAY_V\$SREBP1_01                        | 77  | 401 | 15852 | 2190 | 1.425069 | 0.000731 |
| red        | 4747 REACTOME_CYTOKINE_SIGNALING_IN_IMMUNE_SYSTE   | 18  | 238 | 16015 | 524  | 2.345837 | 0.000733 |
| pink       | 4842 KIM_RESPONSE_TO_TSA_AND_DECITABINE_UP         | 7   | 106 | 16147 | 228  | 4.707506 | 0.000733 |
| purple     | 2289 WGG AATGY_V\$TEF1_Q6                          | 10  | 303 | 15950 | 157  | 3.416577 | 0.000734 |
| black      | 9170 GSE17974_CTRL_VS_ACT_IL4_AND_ANTI_IL12_1H_CD4 | 10  | 168 | 16085 | 283  | 3.418518 | 0.000734 |
| brown      | 9657 GSE29618_BCELL_VS_PDC_DN                      | 43  | 196 | 16057 | 2190 | 1.628178 | 0.000735 |
| brown      | 9946 GSE37416_12H_VS_48H_F_TULARENSIS_LVS_NEUTROI  | 43  | 196 | 16057 | 2190 | 1.628178 | 0.000735 |
| grey60     | 4458 REACTOME_NUCLEOTIDE_LIKE_PURINERGIC_RECEPTOF  | 2   | 15  | 16238 | 44   | 49.25152 | 0.000735 |
| grey60     | 4461 REACTOME_EICOSANOID_LIGAND_BINDING_RECEPTOF   | 2   | 15  | 16238 | 44   | 49.25152 | 0.000735 |
| magenta    | 7687 ZHAN_MULTIPLE_MYELOMA_PR_DN                   | 4   | 40  | 16213 | 167  | 9.732335 | 0.000736 |
| lightcyan  | 1491 V\$IRF2_01                                    | 4   | 107 | 16146 | 62   | 9.799819 | 0.000739 |
| lightcyan  | 7573 MIKKELSEN_MEF_LCP_WITH_H3K4ME3                | 4   | 107 | 16146 | 62   | 9.799819 | 0.000739 |
| greenyello | 9718 GSE30083_SP2_VS_SP4_THYMOCYTE_UP              | 7   | 161 | 16092 | 150  | 4.711014 | 0.000739 |

|             |                                                    |    |     |       |      |          |          |
|-------------|----------------------------------------------------|----|-----|-------|------|----------|----------|
| turquoise   | 2164 RRCCGTTA_UNKNOWN                              | 34 | 80  | 16173 | 4169 | 1.656878 | 0.00074  |
| red         | 9373 GSE22886_NAIVE_CD8_TCELL_VS_DC_DN             | 16 | 199 | 16054 | 524  | 2.493843 | 0.000741 |
| blue        | 4982 OSMAN_BLADDER_CANCER_DN                       | 97 | 391 | 15862 | 2978 | 1.353954 | 0.000743 |
| purple      | 8526 GSE13229_IMM_VS_INTMATURE_NKCELL_UP           | 7  | 154 | 16099 | 157  | 4.705559 | 0.000745 |
| lightcyan   | 9428 GSE24142_ADULT_VS_FETAL_DN2_THYMOCYTE_UP      | 5  | 188 | 16065 | 62   | 6.971946 | 0.000745 |
| black       | 10230 GSE9006_HEALTHY_VS_TYPE_2_DIABETES_PBMC_AT_I | 11 | 199 | 16054 | 283  | 3.174583 | 0.000749 |
| salmon      | 7036 ACEVEDO_LIVER_TUMOR_VS_NORMAL_ADJACENT_TIS    | 16 | 831 | 15422 | 127  | 2.464046 | 0.000755 |
| salmon      | 8892 GSE17721_CTRL_VS_CPG_12H_BMDM_UP              | 7  | 191 | 16062 | 127  | 4.690234 | 0.000756 |
| salmon      | 9703 GSE29618_LAIV_VS_TIV_FLU_VACCINE_DAY7_BCELL_D | 7  | 191 | 16062 | 127  | 4.690234 | 0.000756 |
| lightgreen  | 9492 GSE26928_EFF_MEM_VS_CENTR_MEM_CD4_TCELL_UI    | 4  | 160 | 16093 | 42   | 9.674405 | 0.000757 |
| brown       | 1896 V\$SRF_Q4                                     | 40 | 179 | 16074 | 2190 | 1.658427 | 0.000757 |
| brown       | 9823 GSE360_DC_VS_MAC_T_GONDII_DN                  | 40 | 179 | 16074 | 2190 | 1.658427 | 0.000757 |
| brown       | 9851 GSE360_T_GONDII_VS_B_MALAYI_LOW_DOSE_DC_DN    | 40 | 179 | 16074 | 2190 | 1.658427 | 0.000757 |
| blue        | 8451 GSE11057_EFF_MEM_VS_CENT_MEM_CD4_TCELL_DN     | 50 | 177 | 16076 | 2978 | 1.54172  | 0.000759 |
| red         | 7831 LI_INDUCED_T_TO_NATURAL_KILLER_UP             | 21 | 300 | 15953 | 524  | 2.171202 | 0.000759 |
| turquoise   | 8503 GSE12366_NAIVE_VS_MEMORY_BCELL_DN             | 67 | 184 | 16069 | 4169 | 1.419576 | 0.000761 |
| blue        | 2640 GNF2_ELAC2                                    | 18 | 46  | 16207 | 2978 | 2.135618 | 0.000761 |
| turquoise   | 4922 LIU_VMYB_TARGETS_UP                           | 47 | 120 | 16133 | 4169 | 1.526927 | 0.000763 |
| lightcyan   | 9127 GSE17721_0.5H_VS_12H_CPG_BMDM_DN              | 5  | 189 | 16064 | 62   | 6.935057 | 0.000763 |
| lightgreen  | 7374 HINATA_NFKB_TARGETS_KERATINOCYTE_DN           | 2  | 16  | 16237 | 42   | 48.37202 | 0.000765 |
| purple      | 4611 REACTOME_NITRIC_OXIDE_STIMULATES_GUANYLATE_I  | 3  | 19  | 16234 | 157  | 16.34563 | 0.000765 |
| yellow      | 7033 ACEVEDO_NORMAL_TISSUE_ADJACENT_TO_LIVER_TUM   | 46 | 324 | 15929 | 1426 | 1.61818  | 0.000765 |
| brown       | 3472 ST_STAT3_PATHWAY                              | 6  | 10  | 16243 | 2190 | 4.452877 | 0.000767 |
| greenyello  | 2419 MORF_MAP3K14                                  | 5  | 78  | 16175 | 150  | 6.945726 | 0.000769 |
| lightcyan   | 3729 MODULE_262                                    | 2  | 11  | 16242 | 62   | 47.66276 | 0.00077  |
| lightcyan   | 5694 SEMBA_FHIT_TARGETS_UP                         | 2  | 11  | 16242 | 62   | 47.66276 | 0.00077  |
| purple      | 5751 KHETCHOUMIAN_TRIM24_TARGETS_UP                | 4  | 43  | 16210 | 157  | 9.629981 | 0.000771 |
| purple      | 7222 CROMER_TUMORIGENESIS_UP                       | 4  | 43  | 16210 | 157  | 9.629981 | 0.000771 |
| red         | 6304 LENAOUR_DENDRITIC_CELL_MATURATION_DN          | 12 | 126 | 16127 | 524  | 2.954017 | 0.000772 |
| red         | 7914 WIERENGA_STAT5A_TARGETS_GROUP1                | 12 | 126 | 16127 | 524  | 2.954017 | 0.000772 |
| cyan        | 8168 DURAND_STROMA_MAX_UP                          | 6  | 230 | 16023 | 77   | 5.506381 | 0.000772 |
| lightcyan   | 6819 CREIGHTON_ENDOCRINE_THERAPY_RESISTANCE_2      | 7  | 398 | 15855 | 62   | 4.610593 | 0.000772 |
| lightcyan   | 7351 RUTELLA_RESPONSE_TO_HGF_VS_CSF2RB_AND_IL4_U   | 7  | 398 | 15855 | 62   | 4.610593 | 0.000772 |
| red         | 8541 GSE13306_RA_VS_UNTREATED_TREG_DN              | 14 | 162 | 16091 | 524  | 2.680497 | 0.000774 |
| salmon      | 4772 REACTOME_SCFSP2_MEDIATED_DEGRADATION_OF_F     | 4  | 53  | 16200 | 127  | 9.658595 | 0.000774 |
| salmon      | 8705 GSE1460_CD4_THYMOCYTE_VS_NAIVE_CD4_TCELL_AD   | 7  | 192 | 16061 | 127  | 4.665805 | 0.00078  |
| salmon      | 8941 GSE17721_POLYIC_VS_PAM3CSK4_8H_BMDM_DN        | 7  | 192 | 16061 | 127  | 4.665805 | 0.00078  |
| black       | 10238 GSE9006_TYPE_1_VS_TYPE_2_DIABETES_PBMC_AT_DN | 11 | 200 | 16053 | 283  | 3.15871  | 0.000781 |
| lightcyan   | 9062 GSE17721_POLYIC_VS_GARDIQUIMOD_4H_BMDM_UP     | 5  | 190 | 16063 | 62   | 6.898557 | 0.000781 |
| lightcyan   | 9105 GSE17721_0.5H_VS_4H_POLYIC_BMDM_DN            | 5  | 190 | 16063 | 62   | 6.898557 | 0.000781 |
| lightcyan   | 9520 GSE2706_LPS_VS_R848_AND_LPS_8H_STIM_DC_UP     | 5  | 190 | 16063 | 62   | 6.898557 | 0.000781 |
| greenyello  | 299 VIRAL_GENOME_REPLICATION                       | 3  | 20  | 16233 | 150  | 16.253   | 0.000783 |
| greenyello  | 3622 MODULE_134                                    | 3  | 20  | 16233 | 150  | 16.253   | 0.000783 |
| magenta     | 9270 GSE20366_TREG_VS_NAIVE_CD4_TCELL_DEC205_CON   | 8  | 190 | 16063 | 167  | 4.097825 | 0.000784 |
| red         | 9887 GSE360_HIGH_DOSE_B_MALAYI_VS_M_TUBERCULOSIS   | 15 | 181 | 16072 | 524  | 2.570484 | 0.000787 |
| greenyello  | 7441 MEISSNER_BRAIN_HCP_WITH_H3K27ME3              | 6  | 118 | 16135 | 150  | 5.509492 | 0.000788 |
| cyan        | 7858 HIRSCH_CELLULAR_TRANSFORMATION_SIGNATURE_UF   | 6  | 231 | 16022 | 77   | 5.482543 | 0.00079  |
| pink        | 7576 MIKKELSEN_IPS_ICP_WITH_H3K4ME3_AND_H327ME3    | 6  | 78  | 16175 | 228  | 5.483468 | 0.00079  |
| yellow      | 3123 chr8q24                                       | 23 | 129 | 16124 | 1426 | 2.032133 | 0.000792 |
| brown       | 2978 BIOCARTA_FMLP_PATHWAY                         | 12 | 33  | 16220 | 2190 | 2.698713 | 0.000792 |
| lightyellow | 5680 KIM_MYCN_AMPLIFICATION_TARGETS_DN             | 3  | 90  | 16163 | 33   | 16.41717 | 0.000794 |
| greenyello  | 8537 GSE13306_TREG_RA_VS_TCONV_RA_DN               | 7  | 163 | 16090 | 150  | 4.653211 | 0.000795 |
| lightcyan   | 807 IMMUNE_SYSTEM_PROCESS                          | 6  | 289 | 15964 | 62   | 5.44246  | 0.0008   |
| lightcyan   | 6934 HELLER_HDAC_TARGETS_UP                        | 6  | 289 | 15964 | 62   | 5.44246  | 0.0008   |
| blue        | 3174 chr16q22                                      | 39 | 130 | 16123 | 2978 | 1.637307 | 0.0008   |
| brown       | 9504 GSE2706_UNSTIM_VS_8H_LPS_DC_UP                | 42 | 191 | 16062 | 2190 | 1.631944 | 0.000801 |
| brown       | 10207 GSE7852_LN_VS_FAT_TCONV_DN                   | 42 | 191 | 16062 | 2190 | 1.631944 | 0.000801 |
| black       | 3418 chr16p11                                      | 7  | 87  | 16166 | 283  | 4.620893 | 0.000803 |
| purple      | 9272 GSE20366_CD103_POS_VS_NEG_TREG_KLRG1NEG_UP    | 7  | 156 | 16097 | 157  | 4.645231 | 0.000804 |
| lightgreen  | 6268 MATSUDA_NATURAL_KILLER_DIFFERENTIATION        | 6  | 433 | 15820 | 42   | 5.362257 | 0.000804 |

|             |                                                       |     |     |       |      |          |          |
|-------------|-------------------------------------------------------|-----|-----|-------|------|----------|----------|
| salmon      | 8397 KAECH_DAY15_EFF_VS_MEMORY_CD8_TCELL_DN           | 7   | 193 | 16060 | 127  | 4.64163  | 0.000804 |
| salmon      | 8878 GSE17721_CTRL_VS_PAM3CSK4_24H_BMDM_UP            | 7   | 193 | 16060 | 127  | 4.64163  | 0.000804 |
| salmon      | 9013 GSE17721_POLYIC_VS_CPG_8H_BMDM_DN                | 7   | 193 | 16060 | 127  | 4.64163  | 0.000804 |
| salmon      | 9067 GSE17721_POLYIC_VS_GARDIQUIMOD_8H_BMDM_DN        | 7   | 193 | 16060 | 127  | 4.64163  | 0.000804 |
| salmon      | 9802 GSE360_CTRL_VS_M_TUBERCULOSIS_DC_UP              | 7   | 193 | 16060 | 127  | 4.64163  | 0.000804 |
| purple      | 4365 REACTOME_SIGNALING_BY_GPCR                       | 12  | 421 | 15832 | 157  | 2.950754 | 0.000808 |
| turquoise   | 7722 MIKKELSEN_NPC_ICP_WITH_H3K4ME3                   | 126 | 383 | 15870 | 4169 | 1.282547 | 0.000808 |
| red         | 5154 HAHTOLA_MYCOSIS_FUNGOIDES_CD4_UP                 | 8   | 62  | 16191 | 524  | 4.002216 | 0.000809 |
| magenta     | 8499 GSE12366_PLASMA_CELL_VS_NAIVE_BCELL_DN           | 8   | 191 | 16062 | 167  | 4.076371 | 0.000811 |
| magenta     | 8675 GSE14350_IL2RB_KO_VS_WT_TREG_DN                  | 8   | 191 | 16062 | 167  | 4.076371 | 0.000811 |
| lightgreen  | 5540 HERNANDEZ_ABERRANT_MITOSIS_BY_DOCETACEL_2NI      | 3   | 71  | 16182 | 42   | 16.35111 | 0.000812 |
| red         | 502 REGULATION_OF_BODY_FLUID_LEVELS                   | 7   | 48  | 16205 | 524  | 4.523338 | 0.000814 |
| turquoise   | 3520 MODULE_28                                        | 17  | 32  | 16221 | 4169 | 2.071098 | 0.000815 |
| cyan        | 9711 GSE30083_SP1_VS_SP2_THYMOCYTE_DN                 | 5   | 154 | 16099 | 77   | 6.853179 | 0.000817 |
| red         | 2849 KEGG_FC_GAMMA_R_MEDIATED_PHAGOCYTOSIS            | 10  | 93  | 16160 | 524  | 3.33518  | 0.000818 |
| turquoise   | 2525 GCM_IL6ST                                        | 25  | 54  | 16199 | 4169 | 1.804878 | 0.000818 |
| lightcyan   | 8687 GSE1460_INTRATHYMIC_T_PROGENITOR_VS_CD4_THY      | 5   | 192 | 16061 | 62   | 6.826697 | 0.000819 |
| lightcyan   | 8927 GSE17721_LPS_VS_POLYIC_16H_BMDM_DN               | 5   | 192 | 16061 | 62   | 6.826697 | 0.000819 |
| lightcyan   | 9537 GSE27786_LSK_VS_NKCELL_DN                        | 5   | 192 | 16061 | 62   | 6.826697 | 0.000819 |
| brown       | 1752 V\$MAZR_01                                       | 43  | 197 | 16056 | 2190 | 1.619913 | 0.00082  |
| lightyellow | 8052 PEDERSEN_METASTASIS_BY_ERBB2_ISOFORM_4           | 3   | 91  | 16162 | 33   | 16.23676 | 0.00082  |
| turquoise   | 9145 GSE17721_0.5H_VS_24H_GARDIQUIMOD_BMDM_DN         | 69  | 191 | 16062 | 4169 | 1.408372 | 0.000822 |
| turquoise   | 9555 GSE27786_LIN_NEG_VS_NKTCELL_DN                   | 69  | 191 | 16062 | 4169 | 1.408372 | 0.000822 |
| turquoise   | 9560 GSE27786_LIN_NEG_VS_MONO_MAC_UP                  | 69  | 191 | 16062 | 4169 | 1.408372 | 0.000822 |
| red         | 7628 WORSCHECH_TUMOR_EVASION_AND_TOLEROGENICIT        | 4   | 14  | 16239 | 524  | 8.86205  | 0.000826 |
| cyan        | 4032 PID_IFNGPATHWAY                                  | 3   | 39  | 16214 | 77   | 16.23676 | 0.000826 |
| blue        | 5484 MATTIOLI_MGUS_VS_PCL                             | 32  | 101 | 16152 | 2978 | 1.729169 | 0.000828 |
| salmon      | 8995 GSE17721_LPS_VS_PAM3CSK4_8H_BMDM_DN              | 7   | 194 | 16059 | 127  | 4.617704 | 0.000829 |
| lightgreen  | 3552 MODULE_63                                        | 4   | 164 | 16089 | 42   | 9.438444 | 0.00083  |
| lightgreen  | 10098 GSE3982_NKCELL_VS_TH2_UP                        | 4   | 164 | 16089 | 42   | 9.438444 | 0.00083  |
| purple      | 2235 CAGGTA_V\$AREB6_01                               | 15  | 609 | 15644 | 157  | 2.54981  | 0.000832 |
| red         | 9910 GSE36476_CTRL_VS_TSST_ACT_40H_MEMORY_CD4_TI      | 15  | 182 | 16071 | 524  | 2.556361 | 0.000833 |
| midnightb   | 9368 GSE22886_NAIVE_BCELL_VS_MONOCYTE_UP              | 5   | 168 | 16085 | 71   | 6.812961 | 0.000835 |
| brown       | 2848 KEGG_FC_EPSILON_RI_SIGNALING_PATHWAY             | 19  | 66  | 16187 | 2190 | 2.136481 | 0.000837 |
| red         | 8345 STK33_NOMO_DN                                    | 19  | 261 | 15992 | 524  | 2.257955 | 0.000838 |
| red         | 5773 GROSS_HYPOXIA_VIA_ELK3_DN                        | 13  | 145 | 16108 | 524  | 2.78085  | 0.000838 |
| grey60      | 5818 GUENTHER_GROWTH_SPHERICAL_VS_ADHERENT_UP         | 2   | 16  | 16237 | 44   | 46.1733  | 0.000839 |
| purple      | 6591 ZHU_CMV_24_HR_DN                                 | 5   | 76  | 16177 | 157  | 6.810677 | 0.000839 |
| purple      | 2211 WTTGKCTG_UNKNOWN                                 | 12  | 423 | 15830 | 157  | 2.936803 | 0.000841 |
| greenyello  | 2279 CTAWWWATA_V\$RSRFC4_Q2                           | 9   | 267 | 15986 | 150  | 3.65236  | 0.000843 |
| greenyello  | 6968 WALLACE_PROSTATE_CANCER_RACE_UP                  | 9   | 267 | 15986 | 150  | 3.65236  | 0.000843 |
| blue        | 6394 IVANOVA_HEMATOPOIESIS_EARLY_PROGENITOR           | 118 | 492 | 15761 | 2978 | 1.308958 | 0.000845 |
| lightgreen  | 10112 GSE39820_IL1B_IL6_VS_IL1B_IL6_IL23A_TREATED_CD4 | 4   | 165 | 16088 | 42   | 9.381241 | 0.000849 |
| yellow      | 9893 GSE36392_TYPE_2_MYELOID_VS_MAC_IL25_TREATED_     | 31  | 195 | 16058 | 1426 | 1.811929 | 0.000851 |
| turquoise   | 2813 KEGG_UBIQUITIN_MEDIATED_PROTEOLYSIS              | 50  | 130 | 16123 | 4169 | 1.499437 | 0.000856 |
| cyan        | 6796 KRIGE_RESPONSE_TO_TOSEDOSTAT_24HR_UP             | 11  | 759 | 15494 | 77   | 3.0591   | 0.000857 |
| turquoise   | 7509 BOYAULT_LIVER_CANCER_SUBCLASS_G3_UP              | 68  | 188 | 16065 | 4169 | 1.410109 | 0.000859 |
| lightcyan   | 7334 WUNDER_INFLAMMATORY_RESPONSE_AND_CHOLESTI        | 3   | 49  | 16204 | 62   | 16.0497  | 0.000859 |
| blue        | 9336 GSE22886_NAIVE_BCELL_VS_BM_PLASMA_CELL_UP        | 55  | 200 | 16053 | 2978 | 1.500865 | 0.000864 |
| blue        | 9353 GSE22886_NEUTROPHIL_VS_DC_DN                     | 55  | 200 | 16053 | 2978 | 1.500865 | 0.000864 |
| yellow      | 3345 chr17q25                                         | 27  | 162 | 16091 | 1426 | 1.899603 | 0.000865 |
| purple      | 8381 LEF1_UP.V1_UP                                    | 7   | 158 | 16095 | 157  | 4.586431 | 0.000866 |
| greenyello  | 1460 V\$AP4_01                                        | 8   | 215 | 16038 | 150  | 4.031752 | 0.000869 |
| turquoise   | 1669 V\$GABP_B                                        | 87  | 251 | 16002 | 4169 | 1.351286 | 0.000869 |
| blue        | 9888 GSE360_LOW_DOSE_B_MALAYI_VS_M_TUBERCULOSIS       | 50  | 178 | 16075 | 2978 | 1.533059 | 0.00087  |
| tan         | 5638 OXFORD_RALA_OR_RALB_TARGETS_UP                   | 4   | 48  | 16205 | 145  | 9.340805 | 0.000872 |
| brown       | 9772 GSE339_CD8POS_VS_CD4CD8DN_DC_UP                  | 41  | 186 | 16067 | 2190 | 1.635913 | 0.000873 |
| red         | 3747 MODULE_288                                       | 5   | 24  | 16229 | 524  | 6.461912 | 0.000874 |
| lightcyan   | 286 MULTI_ORGANISM_PROCESS                            | 4   | 112 | 16141 | 62   | 9.362327 | 0.000876 |
| salmon      | 8403 GOLDRATH_EFF_VS_MEMORY_CD8_TCELL_DN              | 7   | 196 | 16057 | 127  | 4.570585 | 0.00088  |

|             |       |                                               |     |     |       |      |          |          |
|-------------|-------|-----------------------------------------------|-----|-----|-------|------|----------|----------|
| red         | 8829  | GSE17580_UNINFECTED_VS_S_MANSONI_INF_TEFF_DI  | 15  | 183 | 16070 | 524  | 2.542391 | 0.000881 |
| turquoise   | 8720  | GSE14769_UNSTIM_VS_80MIN_LPS_BMDM_UP          | 71  | 198 | 16055 | 4169 | 1.39796  | 0.000882 |
| turquoise   | 9173  | GSE17974_CTRL_VS_ACT_IL4_AND_ANTI_IL12_2H_CD4 | 71  | 198 | 16055 | 4169 | 1.39796  | 0.000882 |
| turquoise   | 3509  | MODULE_17                                     | 115 | 346 | 15907 | 4169 | 1.295756 | 0.000883 |
| purple      | 7654  | CAIRO_HEPATOBLASTOMA_DN                       | 8   | 206 | 16047 | 157  | 4.020283 | 0.000886 |
| red         | 2705  | GNF2_STAT6                                    | 9   | 78  | 16175 | 524  | 3.578905 | 0.000888 |
| magenta     | 7451  | ZHAN_EARLY_DIFFERENTIATION_GENES_DN           | 4   | 42  | 16211 | 167  | 9.268891 | 0.000888 |
| turquoise   | 3312  | chr13q12                                      | 27  | 60  | 16193 | 4169 | 1.754342 | 0.000888 |
| yellow      | 7853  | KIM_ALL_DISORDERS_DURATION_CORR_DN            | 24  | 138 | 16115 | 1426 | 1.982194 | 0.000889 |
| cyan        | 5568  | DAUER_STAT3_TARGETS_UP                        | 3   | 40  | 16213 | 77   | 15.83084 | 0.00089  |
| cyan        | 10127 | GSE6269_HEALTHY_VS_FLU_INF_PBMC_DN            | 5   | 157 | 16096 | 77   | 6.722227 | 0.000891 |
| yellow      | 1207  | HISTONE_DEACETYLASE_BINDING                   | 5   | 10  | 16243 | 1426 | 5.698808 | 0.000893 |
| purple      | 7392  | LEE_INTRATHYMIC_T_PROGENITOR                  | 3   | 20  | 16233 | 157  | 15.52834 | 0.000893 |
| brown       | 10260 | GSE9650_EFFECTOR_VS_EXHAUSTED_CD8_TCELL_UP    | 42  | 192 | 16061 | 2190 | 1.623445 | 0.000895 |
| magenta     | 8390  | KAECH_NAIVE_VS_MEMORY_CD8_TCELL_UP            | 8   | 194 | 16059 | 167  | 4.013334 | 0.000897 |
| turquoise   | 10242 | GSE9037_CTRL_VS_LPS_4H_STIM_BMDM_UP           | 67  | 185 | 16068 | 4169 | 1.411903 | 0.000898 |
| lightyellow | 6388  | KUMAR_TARGETS_OF_MLL_AF9_FUSION               | 5   | 376 | 15877 | 33   | 6.549404 | 0.000898 |
| lightcyan   | 8400  | GOLDRATH_NAIVE_VS_MEMORY_CD8_TCELL_UP         | 5   | 196 | 16057 | 62   | 6.687377 | 0.000898 |
| lightcyan   | 8704  | GSE1460_CD4_THYMOCYTE_VS_NAIVE_CD4_TCELL_AD   | 5   | 196 | 16057 | 62   | 6.687377 | 0.000898 |
| salmon      | 6215  | NING_CHRONIC_OBSTRUCTIVE_PULMONARY_DISEASE_   | 6   | 143 | 16110 | 127  | 5.369638 | 0.000902 |
| brown       | 6885  | STEIN_ESRRA_TARGETS_UP                        | 73  | 379 | 15874 | 2190 | 1.429464 | 0.000907 |
| green       | 5906  | BENPORATH_EED_TARGETS                         | 73  | 630 | 15623 | 1305 | 1.44313  | 0.000907 |
| salmon      | 9358  | GSE22886_NAIVE_TCELL_VS_NEUTROPHIL_UP         | 7   | 197 | 16056 | 127  | 4.547384 | 0.000907 |
| brown       | 1669  | V\$GABP_B                                     | 52  | 251 | 16002 | 2190 | 1.537514 | 0.000909 |
| purple      | 5325  | BUSA_SAM68_TARGETS_DN                         | 2   | 5   | 16248 | 157  | 41.40892 | 0.00091  |
| purple      | 7795  | DASU_IL6_SIGNALING_DN                         | 2   | 5   | 16248 | 157  | 41.40892 | 0.00091  |
| purple      | 7899  | WAGSCHAL_EHMT2_TARGETS_UP                     | 2   | 5   | 16248 | 157  | 41.40892 | 0.00091  |
| blue        | 8690  | GSE1460_INTRATHYMIC_T_PROGENITOR_VS_NAIVE_CI  | 54  | 196 | 16057 | 2978 | 1.503649 | 0.000913 |
| blue        | 9399  | GSE22886_UNSTIM_VS_IL2_STIM_NKCELL_DN         | 54  | 196 | 16057 | 2978 | 1.503649 | 0.000913 |
| blue        | 9540  | GSE27786_LSK_VS_ERYTHROBLAST_UP               | 54  | 196 | 16057 | 2978 | 1.503649 | 0.000913 |
| brown       | 10072 | GSE3982_BASOPHIL_VS_EFF_MEMORY_CD4_TCELL_UP   | 43  | 198 | 16055 | 2190 | 1.611731 | 0.000914 |
| purple      | 7249  | VART_KSHV_INFECTION_ANGIOGENIC_MARKERS_DN     | 6   | 116 | 16137 | 157  | 5.354601 | 0.000914 |
| brown       | 4595  | REACTOME_RECYCLING_PATHWAY_OF_L1              | 10  | 25  | 16228 | 2190 | 2.968584 | 0.000916 |
| greenyello  | 10025 | GSE3982_DC_VS_NKCELL_DN                       | 7   | 167 | 16086 | 150  | 4.541756 | 0.000917 |
| red         | 635   | IMMUNE_RESPONSE                               | 16  | 203 | 16050 | 524  | 2.444703 | 0.000917 |
| purple      | 6493  | CHIBA_RESPONSE_TO_TSA_UP                      | 4   | 45  | 16208 | 157  | 9.201982 | 0.000917 |
| purple      | 6549  | CHIBA_RESPONSE_TO_TSA                         | 4   | 45  | 16208 | 157  | 9.201982 | 0.000917 |
| blue        | 4699  | REACTOME_HIV_LIFE_CYCLE                       | 35  | 114 | 16139 | 2978 | 1.675606 | 0.000919 |
| lightcyan   | 9453  | GSE24634_TEFF_VS_TCONV_DAY7_IN_CULTURE_DN     | 5   | 197 | 16056 | 62   | 6.65343  | 0.000919 |
| lightcyan   | 9944  | GSE37416_12H_VS_24H_F_TULARENSIS_LVS_NEUTROI  | 5   | 197 | 16056 | 62   | 6.65343  | 0.000919 |
| yellow      | 5598  | DACOSTA_UV_RESPONSE_VIA_ERCC3_UP              | 43  | 300 | 15953 | 1426 | 1.633658 | 0.00092  |
| lightcyan   | 3672  | MODULE_191                                    | 2   | 12  | 16241 | 62   | 43.69086 | 0.000922 |
| lightcyan   | 4640  | REACTOME_NFKB_ACTIVATION_THROUGH_FADD_RIP1    | 2   | 12  | 16241 | 62   | 43.69086 | 0.000922 |
| lightcyan   | 6677  | WHITESIDE_CISPLATIN_RESISTANCE_DN             | 2   | 12  | 16241 | 62   | 43.69086 | 0.000922 |
| magenta     | 5030  | RHEIN_ALL_GLUCOCORTICOID_THERAPY_UP           | 5   | 73  | 16180 | 167  | 6.665983 | 0.000922 |
| turquoise   | 8854  | GSE17721_CTRL_VS_POLYIC_4H_BMDM_UP            | 70  | 195 | 16058 | 4169 | 1.399475 | 0.000923 |
| turquoise   | 9344  | GSE22886_IGM_MEMORY_BCELL_VS_BM_PLASMA_CE     | 70  | 195 | 16058 | 4169 | 1.399475 | 0.000923 |
| blue        | 5853  | RICKMAN_METASTASIS_UP                         | 83  | 328 | 15925 | 2978 | 1.381062 | 0.000925 |
| magenta     | 9344  | GSE22886_IGM_MEMORY_BCELL_VS_BM_PLASMA_CE     | 8   | 195 | 16058 | 167  | 3.992753 | 0.000928 |
| lightyellow | 7069  | SMID_BREAST_CANCER_BASAL_DN                   | 6   | 574 | 15679 | 33   | 5.148242 | 0.000928 |
| red         | 9616  | GSE27786_NEUTROPHIL_VS_MONO_MAC_UP            | 15  | 184 | 16069 | 524  | 2.528574 | 0.000932 |
| red         | 9781  | GSE339_EX_VIVO_VS_IN_CULTURE_CD4POS_DC_DN     | 15  | 184 | 16069 | 524  | 2.528574 | 0.000932 |
| pink        | 5184  | DELYS_THYROID_CANCER_DN                       | 9   | 178 | 16075 | 228  | 3.604302 | 0.000932 |
| salmon      | 9393  | GSE22886_NAIVE_CD4_TCELL_VS_48H_ACT_TH1_DN    | 7   | 198 | 16055 | 127  | 4.524417 | 0.000934 |
| salmon      | 9395  | GSE22886_NAIVE_CD4_TCELL_VS_12H_ACT_TH2_DN    | 7   | 198 | 16055 | 127  | 4.524417 | 0.000934 |
| lightcyan   | 8297  | BMI1_DN.V1_DN                                 | 4   | 114 | 16139 | 62   | 9.198076 | 0.000936 |
| pink        | 3774  | MODULE_322                                    | 5   | 54  | 16199 | 228  | 6.600471 | 0.00094  |
| lightcyan   | 1490  | V\$IRF1_01                                    | 5   | 198 | 16055 | 62   | 6.619827 | 0.00094  |
| lightcyan   | 8793  | GSE15930_NAIVE_VS_72H_IN_VITRO_STIM_IFNAB_CD  | 5   | 198 | 16055 | 62   | 6.619827 | 0.00094  |
| lightcyan   | 9480  | GSE26669_CTRL_VS_COSTIM_BLOCK_MLR_CD8_TCELL   | 5   | 198 | 16055 | 62   | 6.619827 | 0.00094  |

|            |                                                          |     |     |       |      |          |          |
|------------|----------------------------------------------------------|-----|-----|-------|------|----------|----------|
| purple     | 8348 STK33_SKM_UP                                        | 9   | 259 | 15994 | 157  | 3.5973   | 0.000941 |
| turquoise  | 2461 MORF_RAP1A                                          | 47  | 121 | 16132 | 4169 | 1.514308 | 0.000941 |
| tan        | 1396 OXIDOREDUCTASE_ACTIVITY_ACTING_ON_CH_OH_GRC         | 4   | 49  | 16204 | 145  | 9.150176 | 0.000943 |
| brown      | 2624 GNF2_CD97                                           | 13  | 38  | 16215 | 2190 | 2.538921 | 0.000944 |
| brown      | 2927 BIOCARTA_BIOPEPTIDES_PATHWAY                        | 13  | 38  | 16215 | 2190 | 2.538921 | 0.000944 |
| brown      | 4856 GAZDA_DIAMOND_BLACKFAN_ANEMIA_PROGENITOR_           | 13  | 38  | 16215 | 2190 | 2.538921 | 0.000944 |
| purple     | 6115 SANA_TNF_SIGNALING_DN                               | 5   | 78  | 16175 | 157  | 6.636044 | 0.000944 |
| purple     | 6182 SWEET_KRAS_TARGETS_UP                               | 5   | 78  | 16175 | 157  | 6.636044 | 0.000944 |
| cyan       | 3336 chr22q12                                            | 4   | 92  | 16161 | 77   | 9.177301 | 0.000949 |
| turquoise  | 5008 TAKEDA_TARGETS_OF_NUP98_HOXA9_FUSION_6HR_L          | 30  | 69  | 16184 | 4169 | 1.695016 | 0.000949 |
| greenyello | 10007 GSE3982_MAST_CELL_VS_NKCELL_DN                     | 7   | 168 | 16085 | 150  | 4.514722 | 0.00095  |
| brown      | 10091 GSE3982_CENT_MEMORY_CD4_TCELL_VS_NKCELL_DN         | 40  | 181 | 16072 | 2190 | 1.640102 | 0.000951 |
| lightgreen | 6918 KONDO_PROSTATE_CANCER_WITH_H3K27ME3                 | 3   | 75  | 16178 | 42   | 15.47905 | 0.000952 |
| turquoise  | 3172 chr11q22                                            | 18  | 35  | 16218 | 4169 | 2.004962 | 0.000953 |
| red        | 5507 SCHLOSSER_SERUM_RESPONSE_DN                         | 37  | 667 | 15586 | 524  | 1.720593 | 0.000959 |
| blue       | 4925 CHARAFE_BREAST_CANCER_LUMINAL_VS_BASAL_UP           | 87  | 347 | 15906 | 2978 | 1.368354 | 0.00096  |
| brown      | 492 REGULATION_OF_DEVELOPMENTAL_PROCESS                  | 74  | 386 | 15867 | 2190 | 1.422767 | 0.000962 |
| salmon     | 9346 GSE22886_DAY0_VS_DAY1_MONOCYTE_IN_CULTURE_          | 7   | 199 | 16054 | 127  | 4.501682 | 0.000962 |
| blue       | 6786 BILD_MYC_ONCOGENIC_SIGNATURE                        | 53  | 192 | 16061 | 2978 | 1.50655  | 0.000965 |
| blue       | 10102 GSE39820_CTRL_VS_IL1B_IL6_IL23A_CD4_TCELL_UP       | 53  | 192 | 16061 | 2978 | 1.50655  | 0.000965 |
| turquoise  | 8943 GSE17721_POLYIC_VS_PAM3CSK4_12H_BMDM_DN             | 69  | 192 | 16061 | 4169 | 1.401037 | 0.000966 |
| red        | 5777 GROSS_HYPOXIA_VIA_HIF1A_DN                          | 10  | 95  | 16158 | 524  | 3.264966 | 0.000966 |
| blue       | 7454 MILI_PSEUDOPODIA_CHEMOTAXIS_DN                      | 108 | 446 | 15807 | 2978 | 1.321593 | 0.000966 |
| turquoise  | 5097 NAGASHIMA_NRG1_SIGNALING_DN                         | 22  | 46  | 16207 | 4169 | 1.864518 | 0.000966 |
| purple     | 2807 KEGG_CHEMOKINE_SIGNALING_PATHWAY                    | 7   | 161 | 16092 | 157  | 4.500969 | 0.000967 |
| lightcyan  | 8295 BMI1_DN_MEL18_DN.V1_DN                              | 4   | 115 | 16138 | 62   | 9.118093 | 0.000967 |
| red        | 5085 ZHOU_INFLAMMATORY_RESPONSE_FIMA_UP                  | 26  | 414 | 15839 | 524  | 1.947939 | 0.000968 |
| pink       | 7216 WINTER_HYPOXIA_METAGENE                             | 10  | 216 | 16037 | 228  | 3.300236 | 0.000968 |
| grey60     | 9359 GSE22886_NAIVE_TCELL_VS_NEUTROPHIL_DN               | 4   | 163 | 16090 | 44   | 9.064696 | 0.000968 |
| cyan       | 9515 GSE2706_R848_VS_R848_AND_LPS_2H_STIM_DC_DN          | 5   | 160 | 16093 | 77   | 6.596185 | 0.00097  |
| brown      | 10098 GSE3982_NKCELL_VS_TH2_UP                           | 37  | 164 | 16089 | 2190 | 1.674354 | 0.000972 |
| lightgreen | 3079 BIOCARTA_TOB1_PATHWAY                               | 2   | 18  | 16235 | 42   | 42.99735 | 0.000972 |
| greenyello | 10021 GSE3982_DC_VS_EFF_MEMORY_CD4_TCELL_DN              | 7   | 169 | 16084 | 150  | 4.488008 | 0.000983 |
| cyan       | 3535 MODULE_46                                           | 7   | 332 | 15921 | 77   | 4.450438 | 0.000985 |
| red        | 8255 CAMP_UP.V1_DN                                       | 15  | 185 | 16068 | 524  | 2.514906 | 0.000985 |
| red        | 9275 GSE20366_CD103_KLRG1_DP_VS_DN_TREG_DN               | 15  | 185 | 16068 | 524  | 2.514906 | 0.000985 |
| yellow     | 8133 PECE_MAMMARY_STEM_CELL_DN                           | 23  | 131 | 16122 | 1426 | 2.001108 | 0.000985 |
| lightgreen | 7656 CAIRO_HEPATOBLASTOMA_CLASSES_DN                     | 4   | 172 | 16081 | 42   | 8.999446 | 0.000991 |
| lightgreen | 10073 GSE3982_BASOPHIL_VS_EFF_MEMORY_CD4_TCELL_DN        | 4   | 172 | 16081 | 42   | 8.999446 | 0.000991 |
| magenta    | 10140 GSE6269_E_COLI_VS_STREP_AUREUS_INF_PBMC_UP         | 7   | 152 | 16101 | 167  | 4.481997 | 0.000991 |
| blue       | 8586 GSE13485_DAY1_VS_DAY21_YF17D_VACCINE_PBMC_L         | 50  | 179 | 16074 | 2978 | 1.524494 | 0.000997 |
| brown      | 3928 PID_ENDOTHELINPATHWAY                               | 17  | 57  | 16196 | 2190 | 2.213418 | 0.000999 |
| purple     | 288 POSITIVE_REGULATION_OF_CELL_PROLIFERATION            | 6   | 118 | 16135 | 157  | 5.263845 | 0.000999 |
| blue       | 2490 GCM_GSTA4                                           | 22  | 62  | 16191 | 2978 | 1.9366   | 0.001001 |
| red        | 5067 SENESE_HDAC1_TARGETS_UP                             | 26  | 415 | 15838 | 524  | 1.943245 | 0.001002 |
| red        | 8349 STK33_UP                                            | 19  | 265 | 15988 | 524  | 2.223873 | 0.001004 |
| green      | 2055 KRCTCNMANNANAGC_UNKNOWN                             | 11  | 47  | 16206 | 1305 | 2.914861 | 0.001005 |
| pink       | 6936 HELLER_HDAC_TARGETS_SILENCED_BY_METHYLATION_        | 14  | 381 | 15872 | 228  | 2.6194   | 0.001006 |
| turquoise  | 8827 GSE17580_TREG_VS_TEFF_S_MANSONI_INF_DN              | 68  | 189 | 16064 | 4169 | 1.402648 | 0.00101  |
| blue       | 2433 MORF_PHB                                            | 37  | 123 | 16130 | 2978 | 1.641744 | 0.001017 |
| tan        | 8700 GSE1460_DP_THYMOCYTE_VS_THYMIC_STROMAL_CEL          | 7   | 176 | 16077 | 145  | 4.458111 | 0.001022 |
| salmon     | 6853 GAVIN_FOXP3_TARGETS_CLUSTER_T7                      | 5   | 98  | 16155 | 127  | 6.529407 | 0.001023 |
| salmon     | 7301 CHAUHAN_RESPONSE_TO_METHOXYESTRADIOL_DN             | 5   | 98  | 16155 | 127  | 6.529407 | 0.001023 |
| cyan       | 10134 GSE6269_FLU_VS_E_COLI_INF_PBMC_UP                  | 5   | 162 | 16091 | 77   | 6.514751 | 0.001025 |
| turquoise  | 1943 CTACCTC,LET-7A,LET-7B,LET-7C,LET-7D,LET-7E,LET-7F,M | 112 | 337 | 15916 | 4169 | 1.295656 | 0.001025 |
| cyan       | 6932 HELLER_SILENCED_BY_METHYLATION_UP                   | 6   | 243 | 16010 | 77   | 5.211801 | 0.001027 |
| magenta    | 2917 BIOCARTA_ACE2_PATHWAY                               | 2   | 5   | 16248 | 167  | 38.92934 | 0.001028 |
| magenta    | 5611 FUNG_IL2_TARGETS_WITH_STAT5_BINDING_SITES_T1        | 2   | 5   | 16248 | 167  | 38.92934 | 0.001028 |
| magenta    | 7090 BASSO_HAIRY_CELL_LEUKEMIA_UP                        | 2   | 5   | 16248 | 167  | 38.92934 | 0.001028 |
| turquoise  | 4558 REACTOME_MAP_KINASE_ACTIVATION_IN_TLR_CASCA         | 23  | 49  | 16204 | 4169 | 1.829925 | 0.001033 |

|             |                                                       |     |     |       |      |          |          |
|-------------|-------------------------------------------------------|-----|-----|-------|------|----------|----------|
| lightgreen  | 7854 VERHAAK_GLIOBLASTOMA_PRONEURAL                   | 4   | 174 | 16079 | 42   | 8.896004 | 0.001034 |
| purple      | 3922 MODULE_573                                       | 3   | 21  | 16232 | 157  | 14.7889  | 0.001035 |
| brown       | 273 ESTABLISHMENT_OF_PROTEIN_LOCALIZATION             | 39  | 176 | 16077 | 2190 | 1.644528 | 0.001036 |
| yellow      | 7207 CHNG_MULTIPLE_MYELOMA_HYPERPLOID_UP              | 12  | 50  | 16203 | 1426 | 2.735428 | 0.001037 |
| blue        | 8618 GSE14000_UNSTIM_VS_4H_LPS_DC_UP                  | 54  | 197 | 16056 | 2978 | 1.496016 | 0.001038 |
| red         | 9824 GSE360_DC_VS_MAC_B_MALAYI_HIGH_DOSE_UP           | 15  | 186 | 16067 | 524  | 2.501385 | 0.00104  |
| blue        | 560 REGULATION_OF_TRANSCRIPTION_FROM_RNA_POLYM        | 66  | 251 | 16002 | 2978 | 1.43509  | 0.001041 |
| lightgreen  | 7704 WONG_ADULT_TISSUE_STEM_MODULE                    | 7   | 629 | 15624 | 42   | 4.306571 | 0.001042 |
| greenyello  | 6859 GAVIN_PDE3B_TARGETS                              | 3   | 22  | 16231 | 150  | 14.77545 | 0.001043 |
| red         | 6396 MARTINEZ_RESPONSE_TO_TRABECTEDIN                 | 7   | 50  | 16203 | 524  | 4.342405 | 0.001044 |
| green       | 1135 AMINE_RECEPTOR_ACTIVITY                          | 6   | 16  | 16237 | 1305 | 4.670402 | 0.001049 |
| cyan        | 4807 PICCALUGA_ANGIOIMMUNOBLASTIC_LYMPHOMA_UP         | 5   | 163 | 16090 | 77   | 6.474783 | 0.001054 |
| turquoise   | 2163 ATCATGA,MIR-433                                  | 43  | 109 | 16144 | 4169 | 1.537955 | 0.001054 |
| brown       | 5059 DITTMER_PTHLH_TARGETS_UP                         | 27  | 109 | 16144 | 2190 | 1.838344 | 0.001055 |
| lightgreen  | 3617 MODULE_129                                       | 4   | 175 | 16078 | 42   | 8.84517  | 0.001056 |
| turquoise   | 9143 GSE17721_0.5H_VS_8H_GARDIQUIMOD_BMDM_DN          | 67  | 186 | 16067 | 4169 | 1.404312 | 0.001057 |
| red         | 360 CYCLIC_NUCLEOTIDE_METABOLIC_PROCESS               | 3   | 7   | 16246 | 524  | 13.29308 | 0.001058 |
| purple      | 3609 MODULE_121                                       | 5   | 80  | 16173 | 157  | 6.470143 | 0.001059 |
| lightgreen  | 356 CELL_SURFACE_RECEPTOR_LINKED_SIGNAL_TRANSDUC      | 6   | 457 | 15796 | 42   | 5.08065  | 0.001063 |
| brown       | 9478 GSE26669_CTRL_VS_COSTIM_BLOCK_MLR_CD4_TCELL      | 40  | 182 | 16071 | 2190 | 1.63109  | 0.001064 |
| grey60      | 3548 MODULE_59                                        | 2   | 18  | 16235 | 44   | 41.04293 | 0.001066 |
| lightgreen  | 6385 MOREAUX_B_LYMPHOCYTE_MATURATION_BY_TACI_U        | 3   | 78  | 16175 | 42   | 14.8837  | 0.001067 |
| greenyello  | 225 PLASMA_MEMBRANE_PART                              | 18  | 867 | 15386 | 150  | 2.24955  | 0.001067 |
| turquoise   | 10216 GSE8515_CTRL_VS_IL6_4H_STIM_MAC_UP              | 63  | 173 | 16080 | 4169 | 1.419698 | 0.00107  |
| turquoise   | 6764 MARTINEZ_RESPONSE_TO_TRABECTEDIN_DN              | 91  | 266 | 15987 | 4169 | 1.33371  | 0.001075 |
| brown       | 4066 PID_IL8CXCR2_PATHWAY                             | 12  | 34  | 16219 | 2190 | 2.619339 | 0.001076 |
| brown       | 4080 PID_EOPATHWAY                                    | 12  | 34  | 16219 | 2190 | 2.619339 | 0.001076 |
| blue        | 9318 GSE22886_NAIVE_CD8_TCELL_VS_NKCELL_UP            | 51  | 184 | 16069 | 2978 | 1.512729 | 0.001078 |
| lightyellow | 8294 ALK_DN.V1_UP                                     | 3   | 100 | 16153 | 33   | 14.77545 | 0.001078 |
| tan         | 1186 RIBONUCLEASE_ACTIVITY                            | 3   | 23  | 16230 | 145  | 14.62039 | 0.001081 |
| tan         | 4462 REACTOME_ACTIVATION_OF_GENES_BY_ATF4             | 3   | 23  | 16230 | 145  | 14.62039 | 0.001081 |
| turquoise   | 9071 GSE17721_POLYIC_VS_GARDIQUIMOD_16H_BMDM_D        | 70  | 196 | 16057 | 4169 | 1.392335 | 0.001081 |
| red         | 3544 MODULE_55                                        | 35  | 624 | 15629 | 524  | 1.739745 | 0.001081 |
| purple      | 2055 KRCTCNNNNMANAGC_UNKNOWN                          | 4   | 47  | 16206 | 157  | 8.810408 | 0.001082 |
| yellow      | 15 ORGANELLE_INNER_MEMBRANE                           | 15  | 71  | 16182 | 1426 | 2.407947 | 0.001083 |
| red         | 2814 KEGG_SNARE_INTERACTIONS_IN_VESICULAR_TRANSPC     | 6   | 37  | 16216 | 524  | 5.029812 | 0.001084 |
| red         | 4601 REACTOME_IL1_SIGNALING                           | 6   | 37  | 16216 | 524  | 5.029812 | 0.001084 |
| yellow      | 9590 GSE27786_CD8_TCELL_VS_NKTCELL_UP                 | 29  | 181 | 16072 | 1426 | 1.826137 | 0.001085 |
| turquoise   | 3738 MODULE_277                                       | 24  | 52  | 16201 | 4169 | 1.799325 | 0.00109  |
| pink        | 1645 V\$LMO2COM_02                                    | 9   | 182 | 16071 | 228  | 3.525087 | 0.00109  |
| turquoise   | 3341 chr5q11                                          | 16  | 30  | 16223 | 4169 | 2.07922  | 0.001095 |
| turquoise   | 1851 V\$IRF1_Q6                                       | 73  | 206 | 16047 | 4169 | 1.38152  | 0.001097 |
| blue        | 9364 GSE22886_NAIVE_BCELL_VS_NEUTROPHIL_UP            | 53  | 193 | 16060 | 2978 | 1.498744 | 0.001098 |
| blue        | 9530 GSE27786_LSK_VS_BCELL_UP                         | 53  | 193 | 16060 | 2978 | 1.498744 | 0.001098 |
| blue        | 9536 GSE27786_LSK_VS_NKCELL_UP                        | 53  | 193 | 16060 | 2978 | 1.498744 | 0.001098 |
| red         | 4179 REACTOME_PROTEOLYTIC_CLEAVAGE_OF_SNARE_COM       | 4   | 15  | 16238 | 524  | 8.271247 | 0.001098 |
| yellow      | 214 RIBOSOMAL_SUBUNIT                                 | 7   | 20  | 16233 | 1426 | 3.989165 | 0.001098 |
| lightcyan   | 5332 DARWICHE_SKIN_TUMOR_PROMOTER_UP                  | 4   | 119 | 16134 | 62   | 8.811602 | 0.001098 |
| yellow      | 9322 GSE22886_TCELL_VS_BCELL_NAIVE_UP                 | 31  | 198 | 16055 | 1426 | 1.784475 | 0.001101 |
| yellow      | 9448 GSE24634_TEFF_VS_TCONV_DAY3_IN_CULTURE_UP        | 31  | 198 | 16055 | 1426 | 1.784475 | 0.001101 |
| cyan        | 7049 SAGIV_CD24_TARGETS_DN                            | 3   | 43  | 16210 | 77   | 14.72637 | 0.001101 |
| blue        | 368 TRANSCRIPTION_DNA_DEPENDENT                       | 131 | 558 | 15695 | 2978 | 1.281286 | 0.001103 |
| magenta     | 7443 MEISSNER_BRAIN_HCP_WITH_H3K4ME3_AND_H3K27M       | 18  | 779 | 15474 | 167  | 2.248807 | 0.001105 |
| turquoise   | 8801 GSE15930_STIM_VS_STIM_AND_TRICHOSTATINA_24H      | 66  | 183 | 16070 | 4169 | 1.40603  | 0.001106 |
| brown       | 8570 GSE13484_12H_VS_3H_YF17D_VACCINE_STIM_PBMC       | 42  | 194 | 16059 | 2190 | 1.606708 | 0.001111 |
| brown       | 9315 GSE22886_NAIVE_TCELL_VS_NKCELL_DN                | 42  | 194 | 16059 | 2190 | 1.606708 | 0.001111 |
| brown       | 9463 GSE24634_IL4_VS_CTRL_TREATED_NAIVE_CD4_TCELL     | 42  | 194 | 16059 | 2190 | 1.606708 | 0.001111 |
| magenta     | 8267 PRC2_EZH2_UP.V1_DN                               | 7   | 155 | 16098 | 167  | 4.395248 | 0.001111 |
| red         | 7312 LINDSTEDT_DENDRITIC_CELL_MATURATION_D            | 8   | 65  | 16188 | 524  | 3.817499 | 0.001111 |
| cyan        | 10112 GSE39820_IL1B_IL6_VS_IL1B_IL6_IL23A_TREATED_CD4 | 5   | 165 | 16088 | 77   | 6.396301 | 0.001113 |

|             |       |                                               |     |      |       |      |          |          |
|-------------|-------|-----------------------------------------------|-----|------|-------|------|----------|----------|
| cyan        | 3563  | MODULE_75                                     | 7   | 340  | 15913 | 77   | 4.345722 | 0.00113  |
| turquoise   | 10208 | GSE7852_THYMUS_VS_FAT_TCONV_UP                | 69  | 193  | 16060 | 4169 | 1.393777 | 0.001132 |
| pink        | 8368  | KRAS.600.LUNG.BREAST_UP.V1_DN                 | 9   | 183  | 16070 | 228  | 3.505824 | 0.001133 |
| greenyello  | 4482  | REACTOME_GPCR_DOWNSTREAM_SIGNALING            | 10  | 336  | 15917 | 150  | 3.224802 | 0.001134 |
| red         | 8173  | SMIRNOV_RESPONSE_TO_IR_6HR_DN                 | 11  | 114  | 16139 | 524  | 2.992885 | 0.001135 |
| blue        | 1334  | ATP_DEPENDENT_DNA_HELICASE_ACTIVITY           | 7   | 11   | 16242 | 2978 | 3.473075 | 0.001136 |
| turquoise   | 8023  | GOBERT_OLIGODENDROCYTE_DIFFERENTIATION_UP     | 174 | 554  | 15699 | 4169 | 1.22445  | 0.001144 |
| brown       | 4171  | REACTOME_MEMBRANE_TRAFFICKING                 | 28  | 115  | 16138 | 2190 | 1.806964 | 0.001146 |
| tan         | 6797  | KRIGE_RESPONSE_TO_TOSEDOSTAT_24HR_DN          | 19  | 980  | 15273 | 145  | 2.173167 | 0.001146 |
| red         | 5050  | TONKS_TARGETS_OF_RUNX1_RUNX1T1_FUSION_ERYTI   | 13  | 150  | 16103 | 524  | 2.688155 | 0.001148 |
| brown       | 2996  | BIOCARTA_IL3_PATHWAY                          | 7   | 14   | 16239 | 2190 | 3.710731 | 0.00115  |
| magenta     | 3480  | SIG_BCR_SIGNALING_PATHWAY                     | 4   | 45   | 16208 | 167  | 8.650965 | 0.001154 |
| brown       | 4892  | GARY_CD5_TARGETS_UP                           | 86  | 464  | 15789 | 2190 | 1.375529 | 0.001155 |
| greenyello  | 4489  | REACTOME_G_ALPHA_I_SIGNALLING_EVENTS          | 6   | 127  | 16126 | 150  | 5.119055 | 0.001156 |
| grey60      | 4368  | REACTOME_CLASS_A1_RHODOPSIN_LIKE_RECEPTORS    | 4   | 171  | 16082 | 44   | 8.640617 | 0.001157 |
| salmon      | 182   | INTRACELLULAR_ORGANELLE_PART                  | 19  | 1125 | 15128 | 127  | 2.161379 | 0.001159 |
| red         | 8994  | GSE17721_LPS_VS_PAM3CSK4_8H_BMDM_UP           | 15  | 188  | 16065 | 524  | 2.474775 | 0.001159 |
| red         | 10180 | GSE7460_WT_VS_FOXP3_HET_ACT_WITH_TGFB_TCON    | 15  | 188  | 16065 | 524  | 2.474775 | 0.001159 |
| brown       | 8942  | GSE17721_POLYIC_VS_PAM3CSK4_12H_BMDM_UP       | 39  | 177  | 16076 | 2190 | 1.635237 | 0.001159 |
| red         | 5780  | GROSS_HYPOXIA_VIA_ELK3_AND_HIF1A_UP           | 12  | 132  | 16121 | 524  | 2.819743 | 0.001163 |
| lightyellow | 6347  | DORSEY_GAB2_TARGETS                           | 2   | 25   | 16228 | 33   | 39.40121 | 0.001165 |
| midnightb   | 9486  | GSE26928_NAIVE_VS_EFF_MEMORY_CD4_TCELL_UP     | 5   | 181  | 16072 | 71   | 6.323632 | 0.001165 |
| turquoise   | 8763  | GSE15659_NONSUPPRESSIVE_TCELL_VS_ACTIVATED_TI | 61  | 167  | 16086 | 4169 | 1.424016 | 0.001167 |
| red         | 10236 | GSE9006_1MONTH_VS_4MONTH_POST_TYPE_1_DIABI    | 14  | 169  | 16084 | 524  | 2.56947  | 0.001168 |
| blue        | 2529  | GCM_MAP4K4                                    | 47  | 167  | 16086 | 2978 | 1.535997 | 0.001169 |
| green       | 3258  | chr15q15                                      | 14  | 70   | 16183 | 1305 | 2.490881 | 0.00117  |
| brown       | 3507  | MODULE_15                                     | 66  | 339  | 15914 | 2190 | 1.444886 | 0.001171 |
| purple      | 2836  | KEGG_COMPLEMENT_AND_COAGULATION_CASCADES      | 4   | 48   | 16205 | 157  | 8.626858 | 0.001172 |
| purple      | 5351  | BEGUM_TARGETS_OF_PAX3_FOXO1_FUSION_UP         | 4   | 48   | 16205 | 157  | 8.626858 | 0.001172 |
| salmon      | 5484  | MATTIOLI_MGUS_VS_PCL                          | 5   | 101  | 16152 | 127  | 6.335464 | 0.001172 |
| cyan        | 8659  | GSE1432_CTRL_VS_IFNG_1H_MICROGLIA_DN          | 5   | 167  | 16086 | 77   | 6.319698 | 0.001174 |
| magenta     | 3684  | MODULE_204                                    | 5   | 77   | 16176 | 167  | 6.319698 | 0.001174 |
| red         | 6078  | ROSS_AML_WITH_CBFB_MYH11_FUSION               | 7   | 51   | 16202 | 524  | 4.257259 | 0.001177 |
| cyan        | 6393  | LIANG_SILENCED_BY_METHYLATION_2               | 3   | 44   | 16209 | 77   | 14.39168 | 0.001178 |
| turquoise   | 2053  | ATGTTTC,MIR-494                               | 52  | 138  | 16115 | 4169 | 1.469014 | 0.001178 |
| turquoise   | 2096  | CTGTTAC,MIR-194                               | 38  | 94   | 16159 | 4169 | 1.576004 | 0.00118  |
| green       | 2206  | TTNNANAGCYR_UNKNOWN                           | 18  | 102  | 16151 | 1305 | 2.197836 | 0.001183 |
| turquoise   | 8620  | GSE14000_UNSTIM_VS_16H_LPS_DC_UP              | 68  | 190  | 16063 | 4169 | 1.395266 | 0.001185 |
| turquoise   | 8680  | GSE1448_CTRL_VS_ANTI_VBETA5_DP_THYMOCYTE_UP   | 68  | 190  | 16063 | 4169 | 1.395266 | 0.001185 |
| turquoise   | 9264  | GSE20366_EX_VIVO_VS_HOMEOSTATIC_CONVERSION_   | 68  | 190  | 16063 | 4169 | 1.395266 | 0.001185 |
| cyan        | 4655  | REACTOME_REGULATION_OF_IFNA_SIGNALING         | 2   | 11   | 16242 | 77   | 38.3778  | 0.001185 |
| cyan        | 6432  | RUAN_RESPONSE_TO_TNF_UP                       | 2   | 11   | 16242 | 77   | 38.3778  | 0.001185 |
| salmon      | 5079  | TIEN_INTESTINE_PROBIOTICS_2HR_UP              | 3   | 27   | 16226 | 127  | 14.2196  | 0.001188 |
| purple      | 3018  | BIOCARTA_MCALPAIN_PATHWAY                     | 3   | 22   | 16231 | 157  | 14.11668 | 0.00119  |
| purple      | 5639  | OXFORD_RALA_OR_RALB_TARGETS_DN                | 3   | 22   | 16231 | 157  | 14.11668 | 0.00119  |
| lightgreen  | 10203 | GSE7852_THYMUS_VS_FAT_TREG_DN                 | 4   | 181  | 16072 | 42   | 8.55196  | 0.001197 |
| yellow      | 9572  | GSE27786_BCELL_VS_NEUTROPHIL_UP               | 31  | 199  | 16054 | 1426 | 1.775508 | 0.001197 |
| tan         | 8446  | GSE11057_NAIVE_VS_CENT_MEMORY_CD4_TCELL_UP    | 7   | 181  | 16072 | 145  | 4.334959 | 0.001202 |
| turquoise   | 18    | PEROXISOMAL_MEMBRANE                          | 9   | 13   | 16240 | 4169 | 2.698987 | 0.001204 |
| turquoise   | 112   | MICROBODY_MEMBRANE                            | 9   | 13   | 16240 | 4169 | 2.698987 | 0.001204 |
| turquoise   | 3297  | chr6q16                                       | 9   | 13   | 16240 | 4169 | 2.698987 | 0.001204 |
| lightcyan   | 7794  | DASU_IL6_SIGNALING_UP                         | 3   | 55   | 16198 | 62   | 14.29883 | 0.001204 |
| greenyello  | 9279  | GSE20366_TREG_VS_NAIVE_CD4_TCELL_DN           | 7   | 175  | 16078 | 150  | 4.334133 | 0.001204 |
| cyan        | 9797  | GSE360_CTRL_VS_T_GONDII_DC_DN                 | 5   | 168  | 16085 | 77   | 6.282081 | 0.001205 |
| cyan        | 9815  | GSE360_CTRL_VS_M_TUBERCULOSIS_MAC_DN          | 5   | 168  | 16085 | 77   | 6.282081 | 0.001205 |
| salmon      | 3     | ORGANELLE_PART                                | 19  | 1130 | 15123 | 127  | 2.151815 | 0.001221 |
| lightgreen  | 4980  | JAEGER_METASTASIS_DN                          | 4   | 182  | 16071 | 42   | 8.504971 | 0.001221 |
| red         | 9410  | GSE24142_EARLY_THYMIC_PROGENITOR_VS_DN3_THY   | 15  | 189  | 16064 | 524  | 2.461681 | 0.001223 |
| brown       | 394   | IMMUNE_SYSTEM_DEVELOPMENT                     | 20  | 73   | 16180 | 2190 | 2.033277 | 0.001224 |
| purple      | 2286  | TTCYNRGAA_V\$STAT5B_01                        | 9   | 269  | 15984 | 157  | 3.463571 | 0.001226 |

|             |       |                                               |     |      |       |      |          |          |
|-------------|-------|-----------------------------------------------|-----|------|-------|------|----------|----------|
| blue        | 10027 | GSE3982_DC_VS_TH1_DN                          | 51  | 185  | 16068 | 2978 | 1.504552 | 0.001228 |
| magenta     | 7710  | CHANDRAN_METASTASIS_DN                        | 9   | 253  | 16000 | 167  | 3.462096 | 0.001233 |
| tan         | 8187  | ZWANG_DOWN_BY_2ND_EGF_PULSE                   | 8   | 235  | 16018 | 145  | 3.815818 | 0.001236 |
| red         | 9280  | GSE20715_WT_VS_TLR4_KO_LUNG_UP                | 14  | 170  | 16083 | 524  | 2.554356 | 0.001237 |
| magenta     | 7295  | SEKI_INFLAMMATORY_RESPONSE_LPS_DN             | 3   | 21   | 16232 | 167  | 13.90334 | 0.001237 |
| cyan        | 10245 | GSE9037_CTRL_VS_LPS_1H_STIM_IRAK4_KO_BMDM_I   | 5   | 169  | 16084 | 77   | 6.244909 | 0.001238 |
| purple      | 3701  | MODULE_223                                    | 6   | 123  | 16130 | 157  | 5.049868 | 0.001239 |
| purple      | 5159  | PROVENZANI_METASTASIS_DN                      | 6   | 123  | 16130 | 157  | 5.049868 | 0.001239 |
| turquoise   | 8737  | GSE15324_NAIVE_VS_ACTIVATED_ELF4_KO_CD8_TCEL  | 67  | 187  | 16066 | 4169 | 1.396802 | 0.00124  |
| turquoise   | 9171  | GSE17974_CTRL_VS_ACT_IL4_AND_ANTI_IL12_1H_CD4 | 67  | 187  | 16066 | 4169 | 1.396802 | 0.00124  |
| magenta     | 8810  | GSE15930_STIM_VS_STIM_AND_IFNAB_72H_CD8_T_C   | 7   | 158  | 16095 | 167  | 4.311794 | 0.001241 |
| lightcyan   | 3701  | MODULE_223                                    | 4   | 123  | 16130 | 62   | 8.525046 | 0.001242 |
| lightcyan   | 5338  | DARWICHE_SQUAMOUS_CELL_CARCINOMA_UP           | 4   | 123  | 16130 | 62   | 8.525046 | 0.001242 |
| blue        | 7745  | SENGUPTA_EBNA1_ANTICORRELATED                 | 43  | 150  | 16103 | 2978 | 1.564538 | 0.001244 |
| magenta     | 2844  | KEGG_HEMATOPOIETIC_CELL_LINEAGE               | 5   | 78   | 16175 | 167  | 6.238676 | 0.001244 |
| greenyello  | 1735  | V\$TBP_01                                     | 7   | 176  | 16077 | 150  | 4.309508 | 0.001245 |
| greenyello  | 9742  | GSE32423_MEMORY_VS_NAIVE_CD8_TCELL_UP         | 7   | 176  | 16077 | 150  | 4.309508 | 0.001245 |
| greenyello  | 10085 | GSE3982_EFF_MEMORY_CD4_TCELL_VS_NKCELL_DN     | 7   | 176  | 16077 | 150  | 4.309508 | 0.001245 |
| yellow      | 10169 | GSE7460_CTRL_VS_TGFB_TREATED_ACT_FOXP3_HET_1  | 30  | 191  | 16062 | 1426 | 1.790201 | 0.001246 |
| lightgreen  | 10174 | GSE7460_FOXP3_MUT_VS_WT_ACT_WITH_TGFB_TCOI    | 4   | 183  | 16070 | 42   | 8.458496 | 0.001246 |
| blue        | 8562  | GSE13484_UNSTIM_VS_3H_YF17D_VACCINE_STIM_PB   | 53  | 194  | 16059 | 2978 | 1.491018 | 0.001247 |
| blue        | 10047 | GSE3982_NEUTROPHIL_VS_BCELL_DN                | 53  | 194  | 16059 | 2978 | 1.491018 | 0.001247 |
| turquoise   | 4863  | IGARASHI_ATF4_TARGETS_DN                      | 34  | 82   | 16171 | 4169 | 1.616466 | 0.001248 |
| lightcyan   | 6116  | TARTE_PLASMA_CELL_VS_PLASMABLAST_UP           | 6   | 315  | 15938 | 62   | 4.993241 | 0.001248 |
| brown       | 4162  | REACTOME_CELL_CELL_COMMUNICATION              | 24  | 94   | 16159 | 2190 | 1.894841 | 0.001249 |
| purple      | 7563  | MEISSNER_NPC_HCP_WITH_H3K4ME2                 | 11  | 383  | 15870 | 157  | 2.973225 | 0.001253 |
| midnightb   | 9774  | GSE339_CD4POS_VS_CD8POS_DC_IN_CULTURE_UP      | 5   | 184  | 16069 | 71   | 6.22053  | 0.001253 |
| blue        | 6602  | TAKAO_RESPONSE_TO_UVB_RADIATION_DN            | 30  | 95   | 16158 | 2978 | 1.723481 | 0.001256 |
| turquoise   | 7810  | BAE_BRCA1_TARGETS_UP                          | 30  | 70   | 16183 | 4169 | 1.670801 | 0.001259 |
| yellow      | 4927  | CHARAFE_BREAST_CANCER_LUMINAL_VS_MESENCHYM    | 54  | 405  | 15848 | 1426 | 1.519682 | 0.001262 |
| turquoise   | 2302  | MORF_CCNF                                     | 32  | 76   | 16177 | 4169 | 1.641489 | 0.001262 |
| purple      | 3679  | MODULE_199                                    | 4   | 49   | 16204 | 157  | 8.450799 | 0.001266 |
| purple      | 6459  | HENDRICKS_SMARCA4_TARGETS_UP                  | 4   | 49   | 16204 | 157  | 8.450799 | 0.001266 |
| brown       | 295   | CELL_DEVELOPMENT                              | 93  | 510  | 15743 | 2190 | 1.353325 | 0.001268 |
| cyan        | 9054  | GSE17721_LPS_VS_CPG_24H_BMDM_UP               | 5   | 170  | 16083 | 77   | 6.208174 | 0.001271 |
| blue        | 510   | RNA_BIOSYNTHETIC_PROCESS                      | 131 | 560  | 15693 | 2978 | 1.27671  | 0.001274 |
| yellow      | 8163  | LIM_MAMMARY_STEM_CELL_DN                      | 53  | 396  | 15857 | 1426 | 1.525438 | 0.001279 |
| tan         | 10033 | GSE3982_MAC_VS_BCELL_DN                       | 7   | 183  | 16070 | 145  | 4.287582 | 0.001281 |
| red         | 2184  | GTAGGCA,MIR-189                               | 5   | 26   | 16227 | 524  | 5.964841 | 0.001282 |
| turquoise   | 199   | CONDENSED_CHROMOSOME                          | 17  | 33   | 16220 | 4169 | 2.008337 | 0.001283 |
| turquoise   | 7284  | SPIRA_SMOKERS_LUNG_CANCER_UP                  | 17  | 33   | 16220 | 4169 | 2.008337 | 0.001283 |
| green       | 7201  | HUANG_DASATINIB_RESISTANCE_DN                 | 13  | 63   | 16190 | 1305 | 2.569957 | 0.001283 |
| brown       | 6745  | BROWNE_HCMV_INFECTION_24HR_UP                 | 32  | 138  | 16115 | 2190 | 1.720919 | 0.001284 |
| blue        | 4575  | REACTOME_EFFECTS_OF_PIP2_HYDROLYSIS           | 10  | 20   | 16233 | 2978 | 2.728845 | 0.001285 |
| grey60      | 9965  | GSE3982_DC_VS_MAC_LPS_STIM_DN                 | 4   | 176  | 16077 | 44   | 8.395145 | 0.001287 |
| red         | 9062  | GSE17721_POLYIC_VS_GARDIQUIMOD_4H_BMDM_UP     | 15  | 190  | 16063 | 524  | 2.448724 | 0.001289 |
| lightyellow | 5905  | BENPORATH_SUZ12_TARGETS                       | 6   | 612  | 15641 | 33   | 4.82858  | 0.001292 |
| turquoise   | 3369  | chr3q25                                       | 21  | 44   | 16209 | 4169 | 1.860665 | 0.001295 |
| brown       | 9986  | GSE3982_EOSINOPHIL_VS_NKCELL_UP               | 39  | 178  | 16075 | 2190 | 1.62605  | 0.001296 |
| turquoise   | 8093  | KRIEG_KDM3A_TARGETS_NOT_HYPOXIA               | 66  | 184  | 16069 | 4169 | 1.398388 | 0.001298 |
| turquoise   | 8983  | GSE17721_CPG_VS_GARDIQUIMOD_24H_BMDM_DN       | 66  | 184  | 16069 | 4169 | 1.398388 | 0.001298 |
| blue        | 9486  | GSE26928_NAIVE_VS_EFF_MEMORY_CD4_TCELL_UP     | 50  | 181  | 16072 | 2978 | 1.507649 | 0.001299 |
| blue        | 8042  | JUBAN_TARGETS_OF_SPI1_AND_FLI1_DN             | 28  | 87   | 16166 | 2978 | 1.756498 | 0.001301 |
| greenyello  | 2268  | TGGAAA_V\$NFAT_Q4_01                          | 26  | 1506 | 14747 | 150  | 1.870642 | 0.001305 |
| turquoise   | 4183  | REACTOME_CELL_CYCLE                           | 123 | 377  | 15876 | 4169 | 1.271936 | 0.001305 |
| brown       | 2984  | BIOCARTA_GH_PATHWAY                           | 10  | 26   | 16227 | 2190 | 2.854408 | 0.00131  |
| blue        | 7989  | LEE_BMP2_TARGETS_DN                           | 190 | 850  | 15403 | 2978 | 1.219954 | 0.001312 |
| grey60      | 9990  | GSE3982_EOSINOPHIL_VS_TH2_UP                  | 4   | 177  | 16076 | 44   | 8.347714 | 0.001314 |
| salmon      | 4217  | REACTOME_ACTIVATION_OF_NF_KAPPAB_IN_B_CELLS   | 4   | 61   | 16192 | 127  | 8.391894 | 0.001315 |
| salmon      | 6806  | ZHONG_SECRETOME_OF_LUNG_CANCER_AND_ENDOT      | 4   | 61   | 16192 | 127  | 8.391894 | 0.001315 |



|            |                                                    |     |     |       |      |          |          |
|------------|----------------------------------------------------|-----|-----|-------|------|----------|----------|
| brown      | 7500 POOLA_INVASIVE_BREAST_CANCER_UP               | 51  | 249 | 16004 | 2190 | 1.520058 | 0.001317 |
| grey60     | 3819 MODULE_385                                    | 2   | 20  | 16233 | 44   | 36.93864 | 0.001319 |
| red        | 235 REGULATION_OF_BIOLOGICAL_QUALITY               | 22  | 335 | 15918 | 524  | 2.036949 | 0.001323 |
| salmon     | 5493 LUI_THYROID_CANCER_CLUSTER_3                  | 3   | 28  | 16225 | 127  | 13.71175 | 0.001323 |
| brown      | 1909 V\$SRF_Q5_01                                  | 40  | 184 | 16069 | 2190 | 1.613361 | 0.001324 |
| brown      | 9465 GSE25087_FETAL_VS_ADULT_TREG_DN               | 40  | 184 | 16069 | 2190 | 1.613361 | 0.001324 |
| brown      | 9849 GSE360_T_GONDII_VS_B_MALAYI_HIGH_DOSE_DC_DN   | 40  | 184 | 16069 | 2190 | 1.613361 | 0.001324 |
| purple     | 6327 AFFAR_YY1_TARGETS_UP                          | 7   | 170 | 16083 | 157  | 4.262683 | 0.001326 |
| greenyello | 3580 MODULE_92                                     | 5   | 88  | 16165 | 150  | 6.156439 | 0.001326 |
| greenyello | 5184 DELYS_THYROID_CANCER_DN                       | 7   | 178 | 16075 | 150  | 4.261086 | 0.001328 |
| greenyello | 1324 TRANSMEMBRANE_RECEPTOR_ACTIVITY               | 9   | 285 | 15968 | 150  | 3.421684 | 0.001331 |
| brown      | 10031 GSE3982_MAC_VS_NEUTROPHIL_DN                 | 36  | 161 | 16092 | 2190 | 1.659457 | 0.001336 |
| turquoise  | 7958 LINSLEY_MIR16_TARGETS                         | 72  | 204 | 16049 | 4169 | 1.375954 | 0.001338 |
| turquoise  | 7332 YOSHIMURA_MAPK8_TARGETS_DN                    | 109 | 329 | 15924 | 4169 | 1.291613 | 0.001338 |
| blue       | 5741 PUJANA_XPRSS_INT_NETWORK                      | 47  | 168 | 16085 | 2978 | 1.526854 | 0.00134  |
| turquoise  | 4941 LAIHO_COLORECTAL_CANCER_SERRATED_UP           | 42  | 107 | 16146 | 4169 | 1.530267 | 0.001345 |
| blue       | 1304 RNA_DEPENDENT_ATPASE_ACTIVITY                 | 9   | 17  | 16236 | 2978 | 2.889365 | 0.001346 |
| blue       | 6797 KRIGE_RESPONSE_TO_TOSEDOSTAT_24HR_DN          | 216 | 980 | 15273 | 2978 | 1.202919 | 0.001346 |
| purple     | 8038 KATSANOUE_ELAVL1_TARGETS_DN                   | 6   | 125 | 16128 | 157  | 4.96907  | 0.001346 |
| brown      | 8476 GSE11864_CSF1_IFNG_VS_CSF1_IFNG_PAM3CYS_IN_M  | 41  | 190 | 16063 | 2190 | 1.601473 | 0.001349 |
| greenyello | 3747 MODULE_288                                    | 3   | 24  | 16229 | 150  | 13.54417 | 0.001353 |
| purple     | 3554 MODULE_65                                     | 2   | 6   | 16247 | 157  | 34.50743 | 0.001356 |
| purple     | 3957 PID_INTEGRIN_CS_PATHWAY                       | 3   | 23  | 16230 | 157  | 13.50291 | 0.001359 |
| purple     | 4950 NEWMAN_ERCC6_TARGETS_DN                       | 3   | 23  | 16230 | 157  | 13.50291 | 0.001359 |
| purple     | 6255 WANG_IMMORTALIZED_BY_HOXA9_AND_MEIS1_DN       | 3   | 23  | 16230 | 157  | 13.50291 | 0.001359 |
| red        | 9458 GSE24634_IL4_VS_CTRL_TREATED_NAIVE_CD4_TCELL_ | 15  | 191 | 16062 | 524  | 2.435904 | 0.001359 |
| turquoise  | 8450 GSE11057_EFF_MEM_VS_CENT_MEM_CD4_TCELL_UP     | 65  | 181 | 16072 | 4169 | 1.400027 | 0.001359 |
| turquoise  | 8636 GSE14308_TH2_VS_NATURAL_TREG_UP               | 65  | 181 | 16072 | 4169 | 1.400027 | 0.001359 |
| brown      | 6011 NIKOLSKY_BREAST_CANCER_19Q13.1_AMPLICON       | 9   | 22  | 16231 | 2190 | 3.036052 | 0.001367 |
| brown      | 7684 ZHAN_MULTIPLE_MYELOMA_HP_DN                   | 14  | 44  | 16209 | 2190 | 2.361374 | 0.001367 |
| turquoise  | 1965 CACTGTG,MIR-128A,MIR-128B                     | 99  | 295 | 15958 | 4169 | 1.308323 | 0.001368 |
| brown      | 8400 GOLDRATH_NAIVE_VS_MEMORY_CD8_TCELL_UP         | 42  | 196 | 16057 | 2190 | 1.590313 | 0.001371 |
| brown      | 9934 GSE37416_0H_VS_3H_F_TULARENSIS_LVS_NEUTROPH   | 42  | 196 | 16057 | 2190 | 1.590313 | 0.001371 |
| brown      | 10074 GSE3982_BASOPHIL_VS_CENT_MEMORY_CD4_TCELL_U  | 42  | 196 | 16057 | 2190 | 1.590313 | 0.001371 |
| red        | 6746 WANG_SMARCE1_TARGETS_UP                       | 17  | 231 | 16022 | 524  | 2.282649 | 0.001372 |
| purple     | 6316 VERHAAK_AML_WITH_NPM1_MUTATED_UP              | 7   | 171 | 16082 | 157  | 4.237755 | 0.001372 |
| lightgreen | 10196 GSE7852_TREG_VS_TCONV_FAT_UP                 | 4   | 188 | 16065 | 42   | 8.233536 | 0.001377 |
| lightgreen | 10201 GSE7852_LN_VS_FAT_TREG_DN                    | 4   | 188 | 16065 | 42   | 8.233536 | 0.001377 |
| red        | 6525 WANG_CISPLATIN_RESPONSE_AND_XPC_DN            | 16  | 211 | 16042 | 524  | 2.352013 | 0.001378 |
| red        | 4926 CHARAFE_BREAST_CANCER_LUMINAL_VS_BASAL_DN     | 25  | 402 | 15851 | 524  | 1.928929 | 0.001379 |
| turquoise  | 5071 SENESE_HDAC2_TARGETS_UP                       | 41  | 104 | 16149 | 4169 | 1.536923 | 0.001382 |
| blue       | 4826 LIU_SOX4_TARGETS_DN                           | 75  | 295 | 15958 | 2978 | 1.387548 | 0.001382 |
| red        | 8198 EGFR_UP.V1_UP                                 | 14  | 172 | 16081 | 524  | 2.524654 | 0.001383 |
| blue       | 2448 MORF_PTPN11                                   | 33  | 108 | 16145 | 2978 | 1.667627 | 0.001385 |
| lightcyan  | 3669 MODULE_188                                    | 4   | 127 | 16126 | 62   | 8.256541 | 0.001398 |
| salmon     | 4408 REACTOME_CYCLIN_E_ASSOCIATED_EVENTS_DURING_   | 4   | 62  | 16191 | 127  | 8.256541 | 0.001398 |
| green      | 7560 MEISSNER_BRAIN_HCP_WITH_H3K4ME2_AND_H3K27M    | 9   | 35  | 16218 | 1305 | 3.202562 | 0.001404 |
| lightgreen | 1517 V\$PBX1_01                                    | 4   | 189 | 16064 | 42   | 8.189972 | 0.001404 |
| yellow     | 9626 GSE2826_WT_VS_BTK_KO_BCELL_UP                 | 29  | 184 | 16069 | 1426 | 1.796363 | 0.00141  |
| greenyello | 7133 CHUNG_BLISTER_CYTOTOXICITY_UP                 | 6   | 132 | 16121 | 150  | 4.925152 | 0.00141  |
| turquoise  | 8126 VANOEVELEN_MYOGENESIS_SIN3A_TARGETS           | 74  | 211 | 16042 | 4169 | 1.367259 | 0.001411 |
| midnightb  | 9921 GSE36476_YOUNG_VS_OLD_DONOR_MEMORY_CD4_T      | 5   | 189 | 16064 | 71   | 6.055965 | 0.001411 |
| brown      | 1335 TRANSCRIPTION_FACTOR_ACTIVITY                 | 56  | 280 | 15973 | 2190 | 1.484292 | 0.001412 |
| blue       | 9372 GSE22886_NAIVE_CD8_TCELL_VS_DC_UP             | 53  | 195 | 16058 | 2978 | 1.483372 | 0.001412 |
| blue       | 9673 GSE29618_MONOCYTE_VS_PDC_DAY7_FLU_VACCINE_    | 53  | 195 | 16058 | 2978 | 1.483372 | 0.001412 |
| blue       | 9996 GSE3982_MAST_CELL_VS_NEUTROPHIL_UP            | 53  | 195 | 16058 | 2978 | 1.483372 | 0.001412 |
| blue       | 10088 GSE3982_EFF_MEMORY_CD4_TCELL_VS_TH2_UP       | 46  | 164 | 16089 | 2978 | 1.530815 | 0.001413 |
| greenyello | 1543 V\$HFH1_01                                    | 7   | 180 | 16073 | 150  | 4.213741 | 0.001417 |
| cyan       | 948 DNA_DAMAGE_RESPONSESIGNAL_TRANSDUCTION_BY_     | 2   | 12  | 16241 | 77   | 35.17965 | 0.001418 |
| turquoise  | 4997 GARGALOVIC_RESPONSE_TO_OXIDIZED_PHOSPHOLIPID  | 8   | 11  | 16242 | 4169 | 2.8353   | 0.001422 |

|            |                                                     |     |     |       |      |          |          |
|------------|-----------------------------------------------------|-----|-----|-------|------|----------|----------|
| blue       | 7875 DUTERTRE_ESTRADIOL_RESPONSE_6HR_UP             | 57  | 213 | 16040 | 2978 | 1.460509 | 0.001423 |
| grey60     | 10076 GSE3982_BASOPHIL_VS_NKCELL_UP                 | 4   | 181 | 16072 | 44   | 8.163235 | 0.001427 |
| lightgreen | 9266 GSE20366_EX_VIVO_VS_DEC205_CONVERSION_NAIVE    | 4   | 190 | 16063 | 42   | 8.146867 | 0.001431 |
| magenta    | 1495 V\$HEN1_01                                     | 7   | 162 | 16091 | 167  | 4.20533  | 0.001434 |
| magenta    | 8278 PKCA_DN.V1_UP                                  | 6   | 119 | 16134 | 167  | 4.90706  | 0.001434 |
| lightcyan  | 6634 RODWELL_AGING_KIDNEY_UP                        | 7   | 443 | 15810 | 62   | 4.142249 | 0.001438 |
| brown      | 1037 RHO_PROTEIN_SIGNAL_TRANSDUCTION                | 12  | 35  | 16218 | 2190 | 2.544501 | 0.001439 |
| brown      | 3940 PID_GMCSF_PATHWAY                              | 12  | 35  | 16218 | 2190 | 2.544501 | 0.001439 |
| brown      | 6133 YAGI_AML_RELAPSE_PROGNOSIS                     | 12  | 35  | 16218 | 2190 | 2.544501 | 0.001439 |
| turquoise  | 2017 CTACTGT,MIR-199A                               | 60  | 165 | 16088 | 4169 | 1.41765  | 0.001443 |
| cyan       | 9195 GSE17974_IL4_AND_ANTI_IL12_VS_UNTREATED_6H_A   | 5   | 175 | 16078 | 77   | 6.030798 | 0.001445 |
| cyan       | 9753 GSE32423_CTRL_VS_IL7_IL4_MEMORY_CD8_TCELL_DN   | 5   | 175 | 16078 | 77   | 6.030798 | 0.001445 |
| salmon     | 7250 MOOTHA_HUMAN_MITODB_6_2002                     | 10  | 411 | 15842 | 127  | 3.11378  | 0.001447 |
| turquoise  | 9649 GSE29617_CTRL_VS_DAY3_TIV_FLU_VACCINE_PBMC_2   | 67  | 188 | 16065 | 4169 | 1.389372 | 0.001452 |
| turquoise  | 10100 GSE39820_CTRL_VS_IL1B_IL6_CD4_TCELL_UP        | 67  | 188 | 16065 | 4169 | 1.389372 | 0.001452 |
| salmon     | 4440 REACTOME_G1_S_TRANSITION                       | 5   | 106 | 16147 | 127  | 6.036622 | 0.001453 |
| salmon     | 4771 REACTOME_S_PHASE                               | 5   | 106 | 16147 | 127  | 6.036622 | 0.001453 |
| turquoise  | 2508 GCM_CSNK1A1                                    | 18  | 36  | 16217 | 4169 | 1.949268 | 0.001453 |
| turquoise  | 2438 MORF_PPP2R4                                    | 23  | 50  | 16203 | 4169 | 1.793327 | 0.001454 |
| lightgreen | 8803 GSE15930_STIM_VS_STIM_AND_IL-12_48H_CD8_T_CE   | 4   | 191 | 16062 | 42   | 8.104213 | 0.001459 |
| red        | 5251 GAUSSMANN_MLL_AF4_FUSION_TARGETS_F_UP          | 13  | 154 | 16099 | 524  | 2.618333 | 0.001459 |
| salmon     | 2201 TMTCGCGANR_UNKNOWN                             | 6   | 157 | 16096 | 127  | 4.890817 | 0.001461 |
| turquoise  | 1835 GCGNNANTTCC_UNKNOWN                            | 46  | 120 | 16133 | 4169 | 1.494439 | 0.001461 |
| red        | 8262 RAF_UP.V1_UP                                   | 14  | 173 | 16080 | 524  | 2.51006  | 0.001462 |
| red        | 9650 GSE29617_CTRL_VS_DAY7_TIV_FLU_VACCINE_PBMC_2   | 14  | 173 | 16080 | 524  | 2.51006  | 0.001462 |
| black      | 7439 MEISSNER_NPC_HCP_WITH_H3_UNMETHYLATED          | 16  | 392 | 15861 | 283  | 2.344126 | 0.001463 |
| brown      | 991 REGULATION_OF_PROGRAMMED_CELL_DEATH             | 61  | 311 | 15942 | 2190 | 1.455656 | 0.001463 |
| purple     | 8371 KRAS.BREAST_UP.V1_UP                           | 5   | 86  | 16167 | 157  | 6.018738 | 0.001465 |
| salmon     | 2325 MORF_RAD23A                                    | 9   | 342 | 15911 | 127  | 3.367799 | 0.001465 |
| magenta    | 3523 MODULE_33                                      | 10  | 312 | 15941 | 167  | 3.119338 | 0.001465 |
| turquoise  | 2460 MORF_RAN                                       | 90  | 265 | 15988 | 4169 | 1.324031 | 0.001468 |
| turquoise  | 10072 GSE3982_BASOPHIL_VS_EFF_MEMORY_CD4_TCELL_UP   | 70  | 198 | 16055 | 4169 | 1.378271 | 0.001471 |
| brown      | 9087 GSE17721_LPS_VS_GARDIQUIMOD_12H_BMDM_DN        | 40  | 185 | 16068 | 2190 | 1.60464  | 0.001474 |
| brown      | 9424 GSE24142_DN2_VS_DN3_THYMOCYTE_FETAL_UP         | 40  | 185 | 16068 | 2190 | 1.60464  | 0.001474 |
| turquoise  | 2021 TGTATGA,MIR-485-3P                             | 51  | 136 | 16117 | 4169 | 1.461951 | 0.001476 |
| red        | 3553 MODULE_64                                      | 25  | 404 | 15849 | 524  | 1.91938  | 0.001476 |
| blue       | 9875 GSE360_L_MAJOR_VS_B_MALAYI_LOW_DOSE_MAC_D      | 50  | 182 | 16071 | 2978 | 1.499365 | 0.001478 |
| salmon     | 4140 REACTOME_SIGNALING_BY_WNT                      | 4   | 63  | 16190 | 127  | 8.125484 | 0.001483 |
| pink       | 7641 KOBAYASHI_EGFR_SIGNALING_24HR_UP               | 6   | 88  | 16165 | 228  | 4.860347 | 0.001485 |
| turquoise  | 9169 GSE17974_CTRL_VS_ACT_IL4_AND_ANTI_IL12_0.5H_CI | 63  | 175 | 16078 | 4169 | 1.403473 | 0.001488 |
| green      | 9221 GSE18791_CTRL_VS_NEWCASTLE_VIRUS_DC_2H_DN      | 23  | 147 | 16106 | 1305 | 1.948649 | 0.001491 |
| black      | 5132 WAMUNYOKOLI_OVARIAN_CANCER_LMP_UP              | 12  | 250 | 16003 | 283  | 2.756693 | 0.001492 |
| brown      | 4491 REACTOME_CD28_DEPENDENT_VAV1_PATHWAY           | 6   | 11  | 16242 | 2190 | 4.04807  | 0.001496 |
| brown      | 9579 GSE27786_CD4_TCELL_VS_NKCELL_DN                | 41  | 191 | 16062 | 2190 | 1.593089 | 0.001499 |
| brown      | 10064 GSE3982_BCELL_VS_CENT_MEMORY_CD4_TCELL_UP     | 41  | 191 | 16062 | 2190 | 1.593089 | 0.001499 |
| salmon     | 2338 MORF_SOD1                                      | 8   | 277 | 15976 | 127  | 3.696069 | 0.001502 |
| turquoise  | 3602 MODULE_114                                     | 109 | 330 | 15923 | 4169 | 1.287699 | 0.001502 |
| brown      | 636 HEMOPOIETIC_OR_LYMPHOID_ORGAN_DEVELOPMENT       | 19  | 69  | 16184 | 2190 | 2.043591 | 0.001503 |
| brown      | 4007 PID_IL2_1PATHWAY                               | 16  | 54  | 16199 | 2190 | 2.198951 | 0.001503 |
| turquoise  | 7255 MOOTHA_MITOCHONDRIA                            | 137 | 427 | 15826 | 4169 | 1.250819 | 0.001504 |
| red        | 9132 GSE17721_0.5H_VS_24H_CPG_BMDM_UP               | 15  | 193 | 16060 | 524  | 2.410661 | 0.001507 |
| red        | 10109 GSE39820_CTRL_VS_TGFBETA3_IL6_CD4_TCELL_DN    | 15  | 193 | 16060 | 524  | 2.410661 | 0.001507 |
| greenyello | 9405 GSE24081_CONTROLLER_VS_PROGRESSOR_HIV_SPECIF   | 7   | 182 | 16071 | 150  | 4.167436 | 0.001509 |
| blue       | 2378 MORF_DEK                                       | 67  | 259 | 15994 | 2978 | 1.411835 | 0.001511 |
| turquoise  | 4412 REACTOME_P53_DEPENDENT_G1_DNA_DAMAGE_RESI      | 24  | 53  | 16200 | 4169 | 1.765375 | 0.001514 |
| turquoise  | 4772 REACTOME_SCFSKP2_MEDIATED_DEGRADATION_OF_F     | 24  | 53  | 16200 | 4169 | 1.765375 | 0.001514 |
| turquoise  | 5137 MAYBURD_RESPONSE_TO_L663536_DN                 | 24  | 53  | 16200 | 4169 | 1.765375 | 0.001514 |
| lightcyan  | 8107 FORTSCHEGGER_PHF8_TARGETS_DN                   | 9   | 718 | 15535 | 62   | 3.285942 | 0.001515 |
| purple     | 10233 GSE9006_TYPE_1_DIABETES_AT_DX_VS_1MONTH_POS   | 7   | 174 | 16079 | 157  | 4.16469  | 0.001516 |
| lightgreen | 8457 GSE11057_NAIVE_VS_MEMORY_CD4_TCELL_DN          | 4   | 193 | 16060 | 42   | 8.020232 | 0.001516 |

|            |       |                                               |     |     |       |      |          |          |
|------------|-------|-----------------------------------------------|-----|-----|-------|------|----------|----------|
| cyan       | 8695  | GSE1460_DP_VS_CD4_THYMOCYTE_DN                | 5   | 177 | 16076 | 77   | 5.962653 | 0.001519 |
| purple     | 7571  | MIKKELSEN_MEF_ICP_WITH_H3K27ME3               | 6   | 128 | 16125 | 157  | 4.852607 | 0.00152  |
| brown      | 9349  | GSE22886_DAY0_VS_DAY7_MONOCYTE_IN_CULTURE_    | 42  | 197 | 16056 | 2190 | 1.58224  | 0.001521 |
| turquoise  | 8280  | MTOR_UP.N4.V1_UP                              | 66  | 185 | 16068 | 4169 | 1.390829 | 0.001521 |
| turquoise  | 8891  | GSE17721_CTRL_VS_CPG_8H_BMDM_DN               | 66  | 185 | 16068 | 4169 | 1.390829 | 0.001521 |
| blue       | 4343  | REACTOME_NRAGE_SIGNALS_DEATH_THROUGH_JNK      | 16  | 41  | 16212 | 2978 | 2.12983  | 0.001524 |
| black      | 6691  | IVANOVA_HEMATOPOIESIS_STEM_CELL_AND_PROGEN    | 21  | 588 | 15665 | 283  | 2.051111 | 0.001532 |
| magenta    | 9841  | GSE360_L_MAJOR_VS_T_GONDII_DC_DN              | 7   | 164 | 16089 | 167  | 4.154046 | 0.001539 |
| purple     | 598   | RESPONSE_TO_STRESS                            | 12  | 454 | 15799 | 157  | 2.736272 | 0.001539 |
| greenyello | 8379  | KRAS.PROSTATE_UP.V1_UP                        | 5   | 91  | 16162 | 150  | 5.95348  | 0.00154  |
| purple     | 4405  | REACTOME_INTEGRIN_ALPHAIIIB_BETA3_SIGNALING   | 3   | 24  | 16229 | 157  | 12.94029 | 0.001542 |
| purple     | 5720  | LIEN_BREAST_CARCINOMA_METAPLASTIC             | 3   | 24  | 16229 | 157  | 12.94029 | 0.001542 |
| lightgreen | 7144  | BOQUEST_STEM_CELL_DN                          | 4   | 194 | 16059 | 42   | 7.978891 | 0.001545 |
| turquoise  | 4730  | REACTOME_ACTIVATED_TLR4_SIGNALLING            | 36  | 89  | 16164 | 4169 | 1.576936 | 0.001548 |
| pink       | 3413  | chr16p13                                      | 10  | 230 | 16023 | 228  | 3.099352 | 0.001552 |
| turquoise  | 2073  | CAGCTTT,MIR-320                               | 75  | 215 | 16038 | 4169 | 1.359955 | 0.001555 |
| tan        | 4449  | REACTOME_PERK_REGULATED_GENE_EXPRESSION       | 3   | 26  | 16227 | 145  | 12.93342 | 0.001556 |
| cyan       | 9431  | GSE24142_ADULT_VS_FETAL_DN3_THYMOCYTE_DN      | 5   | 178 | 16075 | 77   | 5.929155 | 0.001557 |
| greenyello | 8369  | KRAS.600.LUNG.BREAST_UP.V1_UP                 | 7   | 183 | 16070 | 150  | 4.144663 | 0.001558 |
| pink       | 3523  | MODULE_33                                     | 12  | 312 | 15941 | 228  | 2.741734 | 0.001559 |
| turquoise  | 4827  | ONKEN_UVEAL_MELANOMA_UP                       | 231 | 761 | 15492 | 4169 | 1.183393 | 0.00156  |
| magenta    | 4224  | REACTOME_SIGNALING_BY_THE_B_CELL_RECEPTOR_B   | 6   | 121 | 16132 | 167  | 4.825951 | 0.001562 |
| blue       | 8478  | GSE11864_CSF1_PAM3CYS_VS_CSF1_IFNG_PAM3CYS_   | 49  | 178 | 16075 | 2978 | 1.502398 | 0.001563 |
| purple     | 2196  | TGACATY_UNKNOWN                               | 13  | 518 | 15735 | 157  | 2.59805  | 0.001569 |
| salmon     | 6091  | BYSTRYKH_HEMATOPOIESIS_STEM_CELL_AND_BRAIN_   | 4   | 64  | 16189 | 127  | 7.998524 | 0.001573 |
| turquoise  | 2190  | SNACANNYSYAGA_UNKNOWN                         | 35  | 86  | 16167 | 4169 | 1.586614 | 0.001575 |
| blue       | 2616  | GNF2_CASP8                                    | 12  | 27  | 16226 | 2978 | 2.42564  | 0.001576 |
| turquoise  | 7703  | WONG_EMBRYONIC_STEM_CELL_CORE                 | 108 | 327 | 15926 | 4169 | 1.28759  | 0.001579 |
| lightgreen | 3535  | MODULE_46                                     | 5   | 332 | 15921 | 42   | 5.827955 | 0.001579 |
| turquoise  | 7878  | DUTERTRE_ESTRADIOL_RESPONSE_24HR_DN           | 148 | 466 | 15787 | 4169 | 1.238162 | 0.001581 |
| purple     | 5626  | BORLAK_LIVER_CANCER_EGF_UP                    | 4   | 52  | 16201 | 157  | 7.963253 | 0.001582 |
| purple     | 8359  | CORDENONSI_YAP_CONSERVED_SIGNATURE            | 4   | 52  | 16201 | 157  | 7.963253 | 0.001582 |
| purple     | 9354  | GSE22886_NEUTROPHIL_VS_MONOCYTE_UP            | 6   | 129 | 16124 | 157  | 4.81499  | 0.001582 |
| brown      | 6801  | DURCHDEWALD_SKIN_CARCINOGENESIS_DN            | 48  | 233 | 16020 | 2190 | 1.528885 | 0.001583 |
| midnightb  | 8448  | GSE11057_NAIVE_CD4_VS_PBMC_CD4_TCELL_UP       | 5   | 194 | 16059 | 71   | 5.899884 | 0.001584 |
| brown      | 1627  | V\$EGR1_01                                    | 49  | 239 | 16014 | 2190 | 1.521555 | 0.001584 |
| blue       | 9806  | GSE360_CTRL_VS_L_MAJOR_MAC_UP                 | 51  | 187 | 16066 | 2978 | 1.488461 | 0.001585 |
| red        | 2806  | KEGG_CYTOKINE_CYTOKINE_RECEPTOR_INTERACTION   | 15  | 194 | 16059 | 524  | 2.398235 | 0.001587 |
| red        | 10105 | GSE39820_CTRL_VS_TGFBETA1_IL6_CD4_TCELL_DN    | 15  | 194 | 16059 | 524  | 2.398235 | 0.001587 |
| magenta    | 1973  | AGTTCTC,MIR-146A,MIR-146B                     | 4   | 49  | 16204 | 167  | 7.944764 | 0.001589 |
| magenta    | 7567  | MIKKELSEN_MCV6_ICP_WITH_H3K27ME3              | 4   | 49  | 16204 | 167  | 7.944764 | 0.001589 |
| blue       | 7819  | BROWNE_HCMV_INFECTION_4HR_DN                  | 59  | 223 | 16030 | 2978 | 1.443963 | 0.001591 |
| turquoise  | 8279  | MTOR_UP.N4.V1_DN                              | 65  | 182 | 16071 | 4169 | 1.392335 | 0.001593 |
| magenta    | 1488  | V\$HEN1_02                                    | 7   | 165 | 16088 | 167  | 4.12887  | 0.001593 |
| turquoise  | 4550  | REACTOME_MITOTIC_G1_G1_S_PHASES               | 49  | 130 | 16123 | 4169 | 1.469448 | 0.001593 |
| lightgreen | 7588  | ONO_AML1_TARGETS_UP                           | 2   | 23  | 16230 | 42   | 33.6501  | 0.001594 |
| turquoise  | 1416  | PHOSPHATASE_REGULATOR_ACTIVITY                | 13  | 23  | 16230 | 4169 | 2.203521 | 0.001595 |
| yellow     | 8436  | GSE10325_BCELL_VS_LUPUS_BCELL_UP              | 25  | 152 | 16101 | 1426 | 1.874608 | 0.001597 |
| blue       | 10254 | GSE9650_NAIVE_VS_EFF_CD8_TCELL_UP             | 53  | 196 | 16057 | 2978 | 1.475804 | 0.001597 |
| grey60     | 556   | AMINO_ACID_CATABOLIC_PROCESS                  | 2   | 22  | 16231 | 44   | 33.58058 | 0.001599 |
| grey60     | 7419  | MCMURRAY_TP53_HRAS_COOPERATION_RESPONSE_L     | 2   | 22  | 16231 | 44   | 33.58058 | 0.001599 |
| yellow     | 9929  | GSE37416_CTRL_VS_12H_F_TULARENSIS_LVS_NEUTRO  | 30  | 194 | 16059 | 1426 | 1.762518 | 0.001601 |
| lightgreen | 8791  | GSE15930_NAIVE_VS_72H_IN_VITRO_STIM_IL12_CD8_ | 4   | 196 | 16057 | 42   | 7.897473 | 0.001604 |
| turquoise  | 2683  | GNF2_PPP6C                                    | 19  | 39  | 16214 | 4169 | 1.899287 | 0.001605 |
| cyan       | 7334  | WUNDER_INFLAMMATORY_RESPONSE_AND_CHOLESTI     | 3   | 49  | 16204 | 77   | 12.92314 | 0.001611 |
| turquoise  | 4386  | REACTOME_CELL_CYCLE_CHECKPOINTS               | 43  | 111 | 16142 | 4169 | 1.510244 | 0.001612 |
| brown      | 6556  | BURTON_ADIPOGENESIS_5                         | 29  | 123 | 16130 | 2190 | 1.749775 | 0.001614 |
| turquoise  | 6484  | PAL_PRMT5_TARGETS_UP                          | 68  | 192 | 16061 | 4169 | 1.380732 | 0.001616 |
| black      | 2188  | RYTGCNWTGGNR_UNKNOWN                          | 7   | 98  | 16155 | 283  | 4.102221 | 0.001617 |
| turquoise  | 2292  | MORF_ATOX1                                    | 33  | 80  | 16173 | 4169 | 1.608146 | 0.00162  |

|            |                                                   |     |     |       |      |          |          |
|------------|---------------------------------------------------|-----|-----|-------|------|----------|----------|
| midnightb  | 8430 GSE10325_LUPUS_CD4_TCELL_VS_LUPUS_MYELOID_U  | 5   | 195 | 16058 | 71   | 5.869628 | 0.00162  |
| magenta    | 2894 KEGG_ASTHMA                                  | 3   | 23  | 16230 | 167  | 12.69435 | 0.001622 |
| magenta    | 7495 VALK_AML_WITH_EVI1                           | 3   | 23  | 16230 | 167  | 12.69435 | 0.001622 |
| purple     | 6557 WESTON_VEGFA_TARGETS                         | 5   | 88  | 16165 | 157  | 5.881948 | 0.001623 |
| purple     | 8378 KRAS.PROSTATE_UP.V1_DN                       | 5   | 88  | 16165 | 157  | 5.881948 | 0.001623 |
| lightcyan  | 5006 GARGALOVIC_RESPONSE_TO_OXIDIZED_PHOSPHOLIPID | 3   | 61  | 16192 | 62   | 12.89238 | 0.001625 |
| purple     | 6954 MARTINEZ_RB1_TARGETS_DN                      | 12  | 457 | 15796 | 157  | 2.71831  | 0.001627 |
| green      | 8824 GSE17580_TREG_VS_TEFF_UP                     | 27  | 184 | 16069 | 1305 | 1.827549 | 0.001631 |
| turquoise  | 5950 SAKAI_TUMOR_INFILTRATING_MONOCYTES_DN        | 32  | 77  | 16176 | 4169 | 1.620171 | 0.001635 |
| turquoise  | 37 MICROTUBULE_CYTOSKELETON                       | 53  | 143 | 16110 | 4169 | 1.444912 | 0.001636 |
| red        | 5087 ZHOU_INFLAMMATORY_RESPONSE_LPS_UP            | 21  | 319 | 15934 | 524  | 2.041883 | 0.001638 |
| brown      | 6223 PENG_RAPAMYCIN_RESPONSE_UP                   | 40  | 186 | 16067 | 2190 | 1.596013 | 0.001639 |
| red        | 9516 GSE2706_R848_VS_R848_AND_LPS_8H_STIM_DC_UP   | 13  | 156 | 16097 | 524  | 2.584765 | 0.00164  |
| turquoise  | 4185 REACTOME_ORC1_REMOVAL_FROM_CHROMATIN         | 28  | 65  | 16188 | 4169 | 1.67937  | 0.001641 |
| red        | 3396 chr6p22                                      | 8   | 69  | 16184 | 524  | 3.596194 | 0.001645 |
| purple     | 2280 TAAWWATAG_V\$RSRFC4_Q2                       | 6   | 130 | 16123 | 157  | 4.777952 | 0.001646 |
| purple     | 5262 LANDIS_ERBB2_BREAST_TUMORS_324_DN            | 6   | 130 | 16123 | 157  | 4.777952 | 0.001646 |
| turquoise  | 3715 MODULE_243                                   | 31  | 74  | 16179 | 4169 | 1.633171 | 0.001646 |
| green      | 1247 NEUROTRANSMITTER_RECEPTOR_ACTIVITY           | 7   | 23  | 16230 | 1305 | 3.790471 | 0.001648 |
| red        | 5568 DAUER_STAT3_TARGETS_UP                       | 6   | 40  | 16213 | 524  | 4.652576 | 0.001649 |
| midnightb  | 9362 GSE22886_NAIVE_TCELL_VS_MONOCYTE_UP          | 5   | 196 | 16057 | 71   | 5.839681 | 0.001657 |
| purple     | 4951 HORIUCHI_WTAP_TARGETS_UP                     | 9   | 281 | 15972 | 157  | 3.315661 | 0.001657 |
| greenyello | 10027 GSE3982_DC_VS_TH1_DN                        | 7   | 185 | 16068 | 150  | 4.099856 | 0.001657 |
| lightcyan  | 1312 DOUBLE_STRANDED_RNA_BINDING                  | 2   | 16  | 16237 | 62   | 32.76815 | 0.00166  |
| lightcyan  | 5839 WOTTON_RUNX_TARGETS_UP                       | 2   | 16  | 16237 | 62   | 32.76815 | 0.00166  |
| salmon     | 10037 GSE3982_MAC_VS_EFF_MEMORY_CD4_TCELL_DN      | 6   | 161 | 16092 | 127  | 4.769306 | 0.00166  |
| cyan       | 7573 MIKKELSEN_MEF_LCP_WITH_H3K4ME3               | 4   | 107 | 16146 | 77   | 7.890763 | 0.001662 |
| green      | 7839 MARTENS_TRETINOIN_RESPONSE_UP                | 57  | 478 | 15775 | 1305 | 1.485149 | 0.001663 |
| brown      | 9589 GSE27786_CD8_TCELL_VS_NKCELL_DN              | 41  | 192 | 16061 | 2190 | 1.584791 | 0.001664 |
| brown      | 10004 GSE3982_MAST_CELL_VS_CENT_MEMORY_CD4_TCELL  | 41  | 192 | 16061 | 2190 | 1.584791 | 0.001664 |
| brown      | 10020 GSE3982_DC_VS_EFF_MEMORY_CD4_TCELL_UP       | 41  | 192 | 16061 | 2190 | 1.584791 | 0.001664 |
| lightgreen | 1853 V\$HMGIIY_Q6                                 | 4   | 198 | 16055 | 42   | 7.817701 | 0.001665 |
| salmon     | 618 PROTEIN_RNA_COMPLEX_ASSEMBLY                  | 4   | 65  | 16188 | 127  | 7.875469 | 0.001666 |
| red        | 6921 KONDO_EZH2_TARGETS                           | 15  | 195 | 16058 | 524  | 2.385937 | 0.001669 |
| purple     | 5455 LINDGREN_BLADDER_CANCER_CLUSTER_2B           | 10  | 338 | 15915 | 157  | 3.06279  | 0.00167  |
| cyan       | 3003 BIOCARTA_IL22BP_PATHWAY                      | 2   | 13  | 16240 | 77   | 32.47353 | 0.001671 |
| cyan       | 7601 TSAI_DNAJB4_TARGETS_UP                       | 2   | 13  | 16240 | 77   | 32.47353 | 0.001671 |
| blue       | 8134 ABRAMSON_INTERACT_WITH_AIRE                  | 17  | 45  | 16208 | 2978 | 2.061794 | 0.001671 |
| yellow     | 4180 REACTOME_RESOLUTION_OF_AP_SITES_VIA_THE_MUI  | 6   | 16  | 16237 | 1426 | 4.274106 | 0.001671 |
| yellow     | 6017 NIKOLSKY_BREAST_CANCER_22Q13_AMPLICON        | 6   | 16  | 16237 | 1426 | 4.274106 | 0.001671 |
| purple     | 9525 GSE2706_2H_VS_8H_LPS_STIM_DC_DN              | 7   | 177 | 16076 | 157  | 4.094102 | 0.001672 |
| cyan       | 8569 GSE13484_12H_UNSTIM_VS_YF17D_VACCINE_STIM_PI | 5   | 181 | 16072 | 77   | 5.830882 | 0.001676 |
| cyan       | 9046 GSE17721_LPS_VS_CPG_6H_BMDM_UP               | 5   | 181 | 16072 | 77   | 5.830882 | 0.001676 |
| blue       | 9960 GSE3982_MEMORY_CD4_TCELL_VS_TH2_UP           | 50  | 183 | 16070 | 2978 | 1.491172 | 0.001678 |
| cyan       | 8000 FEVR_CTNNB1_TARGETS_UP                       | 9   | 582 | 15671 | 77   | 3.264092 | 0.001679 |
| red        | 1952 TGCCTG,MIR-148A,MIR-152,MIR-148B             | 19  | 277 | 15976 | 524  | 2.127532 | 0.001682 |
| brown      | 967 PROTEIN_LOCALIZATION                          | 42  | 198 | 16055 | 2190 | 1.574249 | 0.001684 |
| brown      | 8447 GSE11057_NAIVE_VS_CENT_MEMORY_CD4_TCELL_DN   | 42  | 198 | 16055 | 2190 | 1.574249 | 0.001684 |
| blue       | 515 CELLULAR_CATABOLIC_PROCESS                    | 52  | 192 | 16061 | 2978 | 1.478124 | 0.001693 |
| greenyello | 3652 MODULE_169                                   | 5   | 93  | 16160 | 150  | 5.825448 | 0.001696 |
| lightcyan  | 7309 LINDSTEDT_DENDRITIC_CELL_MATURATION_A        | 3   | 62  | 16191 | 62   | 12.68444 | 0.001703 |
| yellow     | 2873 KEGG_HUNTINGTONS_DISEASE                     | 26  | 161 | 16092 | 1426 | 1.840609 | 0.001705 |
| turquoise  | 9249 GSE19825_NAIVE_VS_IL2RALOW_DAY3_EFF_CD8_TCEL | 70  | 199 | 16054 | 4169 | 1.371345 | 0.001709 |
| turquoise  | 9592 GSE27786_CD8_TCELL_VS_ERYTHROBLAST_UP        | 70  | 199 | 16054 | 4169 | 1.371345 | 0.001709 |
| cyan       | 9509 GSE2706_UNSTIM_VS_8H_LPS_AND_R848_DC_DN      | 5   | 182 | 16071 | 77   | 5.798844 | 0.001717 |
| red        | 9834 GSE360_L_DONOVANI_VS_B_MALAYI_HIGH_DOSE_DC   | 14  | 176 | 16077 | 524  | 2.467275 | 0.00172  |
| red        | 10085 GSE3982_EFF_MEMORY_CD4_TCELL_VS_NKCELL_DN   | 14  | 176 | 16077 | 524  | 2.467275 | 0.00172  |
| turquoise  | 5446 IWANAGA_E2F1_TARGETS_INDUCED_BY_SERUM        | 16  | 31  | 16222 | 4169 | 2.012148 | 0.001728 |
| turquoise  | 2290 GCCATNTTG_V\$YY1_Q6                          | 130 | 404 | 15849 | 4169 | 1.25448  | 0.001733 |
| brown      | 932 DETECTION_OF_BIOTIC_STIMULUS                  | 5   | 8   | 16245 | 2190 | 4.638413 | 0.001737 |

|             |                                                       |     |     |       |      |          |          |
|-------------|-------------------------------------------------------|-----|-----|-------|------|----------|----------|
| brown       | 5201 BERENJENO_TRANSFORMED_BY_RHOA_REVERSIBLY_U       | 5   | 8   | 16245 | 2190 | 4.638413 | 0.001737 |
| purple      | 3041 BIOCARTA_EDG1_PATHWAY                            | 3   | 25  | 16228 | 157  | 12.42268 | 0.00174  |
| purple      | 6042 ROZANOV_MMP14_TARGETS_SUBSET                     | 3   | 25  | 16228 | 157  | 12.42268 | 0.00174  |
| brown       | 2718 KEGG_GLYCOLYSIS_GLUONEOGENESIS                   | 14  | 45  | 16208 | 2190 | 2.308899 | 0.001742 |
| brown       | 6088 GNATENKO_PLATELET_SIGNATURE                      | 14  | 45  | 16208 | 2190 | 2.308899 | 0.001742 |
| blue        | 6795 KRIGE_RESPONSE_TO_TOSEDOSTAT_6HR_DN              | 195 | 880 | 15373 | 2978 | 1.209374 | 0.001752 |
| greenyello  | 7266 BOYLAN_MULTIPLE_MYELOMA_C_D_DN                   | 8   | 240 | 16013 | 150  | 3.611778 | 0.001752 |
| blue        | 5240 GRAESSMANN_RESPONSE_TO_MC_AND_DOXORUBICIN        | 168 | 746 | 15507 | 2978 | 1.229078 | 0.001754 |
| red         | 9946 GSE37416_12H_VS_48H_F_TULARENSIS_LVS_NEUTROPHILS | 15  | 196 | 16057 | 524  | 2.373763 | 0.001756 |
| pink        | 6506 LEE_AGING_CEREBELLUM_DN                          | 5   | 62  | 16191 | 228  | 5.748797 | 0.001757 |
| blue        | 6008 NIKOLSKY_BREAST_CANCER_17Q11_Q21_AMPLICON        | 31  | 101 | 16152 | 2978 | 1.675132 | 0.001758 |
| lightgreen  | 5164 COLDREN_GEFITINIB_RESISTANCE_DN                  | 4   | 201 | 16052 | 42   | 7.701019 | 0.001759 |
| greenyello  | 1786 V\$FOXM1_01                                      | 7   | 187 | 16066 | 150  | 4.056007 | 0.001762 |
| greenyello  | 9728 GSE30962_ACUTE_VS_CHRONIC_LCMV_SECONDARY_INFECT  | 7   | 187 | 16066 | 150  | 4.056007 | 0.001762 |
| pink        | 8978 GSE17721_CPG_VS_GARDIQUIMOD_12H_BMDM_UP          | 8   | 158 | 16095 | 228  | 3.609372 | 0.001763 |
| midnightb   | 7557 YAGI_AML_WITH_T_9_11_TRANSLOCATION               | 4   | 118 | 16135 | 71   | 7.759847 | 0.001764 |
| salmon      | 8865 GSE17721_CTRL_VS_PAM3CSK4_0.5H_BMDM_DN           | 6   | 163 | 16090 | 127  | 4.710787 | 0.001768 |
| blue        | 9305 GSE22045_TREG_VS_TCONV_DN                        | 49  | 179 | 16074 | 2978 | 1.494004 | 0.001777 |
| purple      | 4970 VECCHI_GASTRIC_CANCER_ADVANCED_VS_EARLY_UP       | 6   | 132 | 16121 | 157  | 4.705559 | 0.001779 |
| lightyellow | 8278 PKCA_DN.V1_UP                                    | 3   | 119 | 16134 | 33   | 12.41635 | 0.001779 |
| purple      | 6044 ROZANOV_MMP14_TARGETS_UP                         | 8   | 230 | 16023 | 157  | 3.600775 | 0.001789 |
| lightyellow | 3224 chr11q14                                         | 2   | 31  | 16222 | 33   | 31.77517 | 0.001792 |
| brown       | 9843 GSE360_L_MAJOR_VS_B_MALAYI_HIGH_DOSE_DC_DN       | 39  | 181 | 16072 | 2190 | 1.599099 | 0.001792 |
| brown       | 10076 GSE3982_BASOPHIL_VS_NKCELL_UP                   | 39  | 181 | 16072 | 2190 | 1.599099 | 0.001792 |
| turquoise   | 9902 GSE36476_CTRL_VS_TSST_ACT_16H_MEMORY_CD4_TCELL   | 69  | 196 | 16057 | 4169 | 1.372444 | 0.001792 |
| magenta     | 5811 LIAO_METASTASIS                                  | 13  | 494 | 15759 | 167  | 2.561141 | 0.001795 |
| lightyellow | 4909 CASORELLI_ACUTE_PROMYELOCYTIC_LEUKEMIA_DN        | 6   | 653 | 15600 | 33   | 4.525407 | 0.0018   |
| cyan        | 9993 GSE3982_MAST_CELL_VS_DC_DN                       | 5   | 184 | 16069 | 77   | 5.735813 | 0.001801 |
| blue        | 9226 GSE18791_CTRL_VS_NEWCASTLE_VIRUS_DC_8H_UP        | 53  | 197 | 16056 | 2978 | 1.468312 | 0.001803 |
| blue        | 9234 GSE18791_CTRL_VS_NEWCASTLE_VIRUS_DC_16H_UP       | 53  | 197 | 16056 | 2978 | 1.468312 | 0.001803 |
| cyan        | 5288 ROYLANCE_BREAST_CANCER_16Q_COPY_NUMBER_UP        | 3   | 51  | 16202 | 77   | 12.41635 | 0.001808 |
| turquoise   | 4429 REACTOME_METABOLISM_OF_PROTEINS                  | 127 | 394 | 15859 | 4169 | 1.256635 | 0.001814 |
| lightyellow | 5907 BENPORATH_ES_WITH_H3K27ME3                       | 6   | 654 | 15599 | 33   | 4.518488 | 0.001814 |
| red         | 9007 GSE17721_POLYIC_VS_CPG_2H_BMDM_DN                | 14  | 177 | 16076 | 524  | 2.453336 | 0.001814 |
| blue        | 7028 MCCABE_HOXC6_TARGETS_CANCER_UP                   | 11  | 24  | 16229 | 2978 | 2.501441 | 0.001816 |
| red         | 4995 GARGALOVIC_RESPONSE_TO_OXIDIZED_PHOSPHOLIPID     | 5   | 28  | 16225 | 524  | 5.538781 | 0.001816 |
| red         | 4176 REACTOME_BOTULINUM_NEUROTOXICITY                 | 4   | 17  | 16236 | 524  | 7.298159 | 0.001819 |
| red         | 6487 ZHANG_RESPONSE_TO_CANTHARIDIN_UP                 | 4   | 17  | 16236 | 524  | 7.298159 | 0.001819 |
| brown       | 3406 chr12q13                                         | 40  | 187 | 16066 | 2190 | 1.587478 | 0.00182  |
| brown       | 10213 GSE8384_CTRL_VS_B_ABORTUS_4H_MAC_CELL_LINE_I    | 40  | 187 | 16066 | 2190 | 1.587478 | 0.00182  |
| black       | 4912 HUTTMANN_B_CLL_POOR_SURVIVAL_UP                  | 12  | 256 | 15997 | 283  | 2.692083 | 0.001821 |
| salmon      | 6172 FERNANDEZ_BOUND_BY_MYC                           | 6   | 164 | 16089 | 127  | 4.682063 | 0.001823 |
| yellow      | 2729 KEGG_OXIDATIVE_PHOSPHORYLATION                   | 19  | 105 | 16148 | 1426 | 2.062426 | 0.001824 |
| magenta     | 7872 HOELZEL_NF1_TARGETS_DN                           | 5   | 85  | 16168 | 167  | 5.724903 | 0.001825 |
| magenta     | 10113 GSE39820_IL1B_IL6_VS_IL1B_IL6_IL23A_TREATED_CD4 | 7   | 169 | 16084 | 167  | 4.031145 | 0.001827 |
| brown       | 693 PROTEIN_SECRETION                                 | 10  | 27  | 16226 | 2190 | 2.748689 | 0.001832 |
| brown       | 7258 DAVIES_MULTIPLE_MYELOMA_VS_MGUS_DN               | 10  | 27  | 16226 | 2190 | 2.748689 | 0.001832 |
| purple      | 5126 GRAHAM_CML_DIVIDING_VS_NORMAL QUIESCENT_U        | 7   | 180 | 16073 | 157  | 4.025867 | 0.00184  |
| brown       | 9422 GSE24142_EARLY_THYMIC_PROGENITOR_VS_DN3_THY      | 41  | 193 | 16060 | 2190 | 1.57658  | 0.001843 |
| brown       | 9804 GSE360_CTRL_VS_L_DONOVANI_MAC_UP                 | 41  | 193 | 16060 | 2190 | 1.57658  | 0.001843 |
| brown       | 10109 GSE39820_CTRL_VS_TGFBETA3_IL6_CD4_TCELL_DN      | 41  | 193 | 16060 | 2190 | 1.57658  | 0.001843 |
| brown       | 10122 GSE5463_CTRL_VS_DEXAMETHASONE_TREATED_THYM      | 41  | 193 | 16060 | 2190 | 1.57658  | 0.001843 |
| cyan        | 9044 GSE17721_LPS_VS_CPG_4H_BMDM_UP                   | 5   | 185 | 16068 | 77   | 5.704809 | 0.001844 |
| cyan        | 10160 GSE7460_CD8_TCELL_VS_CD4_TCELL_ACT_UP           | 5   | 185 | 16068 | 77   | 5.704809 | 0.001844 |
| magenta     | 3937 PID_INTEGRIN1_PATHWAY                            | 4   | 51  | 16202 | 167  | 7.633204 | 0.001845 |
| red         | 5217 MARKEY_RB1_ACUTE_LOF_UP                          | 15  | 197 | 16056 | 524  | 2.361714 | 0.001845 |
| salmon      | 7164 BHATI_G2M_ARREST_BY_2METHOXYESTRADIOL_DN         | 5   | 112 | 16141 | 127  | 5.713231 | 0.001854 |
| lightcyan   | 7858 HIRSCH_CELLULAR_TRANSFORMATION_SIGNATURE_UP      | 5   | 231 | 16022 | 62   | 5.674138 | 0.00186  |
| black       | 9345 GSE22886_IGM_MEMORY_BCELL_VS_BM_PLASMA_CELL      | 10  | 190 | 16063 | 283  | 3.022689 | 0.00186  |
| turquoise   | 9017 GSE17721_POLYIC_VS_CPG_16H_BMDM_DN               | 65  | 183 | 16070 | 4169 | 1.384726 | 0.001861 |

|             |       |                                              |     |     |       |      |          |          |
|-------------|-------|----------------------------------------------|-----|-----|-------|------|----------|----------|
| turquoise   | 5912  | BENPORATH_PROLIFERATION                      | 54  | 147 | 16106 | 4169 | 1.432116 | 0.001871 |
| turquoise   | 8214  | CSR_EARLY_UP.V1_UP                           | 54  | 147 | 16106 | 4169 | 1.432116 | 0.001871 |
| greenyello  | 8617  | GSE14000_UNSTIM_VS_16H_LPS_DC_TRANSLATED_RN  | 7   | 189 | 16064 | 150  | 4.013086 | 0.001872 |
| greenyello  | 10153 | GSE7460_TCONV_VS_TREG_THYMUS_DN              | 7   | 189 | 16064 | 150  | 4.013086 | 0.001872 |
| lightcyan   | 7459  | CROONQUIST_IL6_DEPRIVATION_UP                | 2   | 17  | 16236 | 62   | 30.84061 | 0.001877 |
| turquoise   | 4745  | REACTOME_ADAPTIVE_IMMUNE_SYSTEM              | 156 | 496 | 15757 | 4169 | 1.226153 | 0.001879 |
| turquoise   | 8501  | GSE12366_PLASMA_CELL_VS_MEMORY_BCELL_DN      | 68  | 193 | 16060 | 4169 | 1.373578 | 0.00188  |
| turquoise   | 10049 | GSE3982_NEUTROPHIL_VS_BASOPHIL_DN            | 68  | 193 | 16060 | 4169 | 1.373578 | 0.00188  |
| blue        | 4325  | REACTOME_TRANSPORT_OF_MATURE_TRANSCRIPT_T    | 19  | 53  | 16200 | 2978 | 1.95653  | 0.001882 |
| turquoise   | 5086  | ZHOU_INFLAMMATORY_RESPONSE_FIMA_DN           | 85  | 250 | 16003 | 4169 | 1.325503 | 0.001882 |
| lightgreen  | 5326  | KAN_RESPONSE_TO_ARSENIC_TRIOXIDE             | 3   | 95  | 16158 | 42   | 12.2203  | 0.001883 |
| turquoise   | 2350  | MORF_AP2M1                                   | 74  | 213 | 16040 | 4169 | 1.354421 | 0.001883 |
| greenyello  | 4095  | PID_MYC_REPRESSPATHWAY                       | 4   | 57  | 16196 | 150  | 7.603743 | 0.001883 |
| magenta     | 6626  | MCLACHLAN_DENTAL_CARIES_DN                   | 8   | 218 | 16035 | 167  | 3.571499 | 0.001886 |
| purple      | 1106  | PHOSPHORUS_OXYGEN_LYASE_ACTIVITY             | 2   | 7   | 16246 | 157  | 29.5778  | 0.001886 |
| purple      | 5583  | TERAMOTO_OPN_TARGETS_CLUSTER_8               | 2   | 7   | 16246 | 157  | 29.5778  | 0.001886 |
| purple      | 5635  | OXFORD_RALB_TARGETS_UP                       | 2   | 7   | 16246 | 157  | 29.5778  | 0.001886 |
| yellow      | 3636  | MODULE_151                                   | 43  | 311 | 15942 | 1426 | 1.575876 | 0.001886 |
| pink        | 3692  | MODULE_212                                   | 11  | 277 | 15976 | 228  | 2.830816 | 0.001889 |
| turquoise   | 68    | ENDOPLASMIC_RETICULUM                        | 90  | 267 | 15986 | 4169 | 1.314114 | 0.001894 |
| lightcyan   | 6158  | BROCKE_APOPTOSIS_REVERSED_BY_IL6             | 4   | 138 | 16115 | 62   | 7.59841  | 0.001896 |
| purple      | 6364  | YAGI_AML_FAB_MARKERS                         | 7   | 181 | 16072 | 157  | 4.003625 | 0.001899 |
| salmon      | 5847  | RICKMAN_TUMOR_DIFFERENTIATED_WELL_VS_POORL   | 7   | 224 | 16029 | 127  | 3.999262 | 0.001899 |
| brown       | 5792  | BUYTAERT_PHOTODYNAMIC_THERAPY_STRESS_UP      | 133 | 778 | 15475 | 2190 | 1.268707 | 0.0019   |
| brown       | 7648  | HOSHIDA_LIVER_CANCER_SUBCLASS_S1             | 46  | 223 | 16030 | 2190 | 1.530884 | 0.001902 |
| grey60      | 631   | AMINE_CATABOLIC_PROCESS                      | 2   | 24  | 16229 | 44   | 30.7822  | 0.001903 |
| brown       | 6342  | XU_RESPONSE_TO_TRETINOIN_UP                  | 7   | 15  | 16238 | 2190 | 3.463349 | 0.001907 |
| blue        | 7709  | CHANDRAN_METASTASIS_UP                       | 54  | 202 | 16051 | 2978 | 1.458986 | 0.001914 |
| greenyello  | 424   | VIRAL_INFECTIOUS_CYCLE                       | 3   | 27  | 16226 | 150  | 12.03926 | 0.001916 |
| greenyello  | 2688  | GNF2_RAB3A                                   | 3   | 27  | 16226 | 150  | 12.03926 | 0.001916 |
| pink        | 6550  | RODWELL_AGING_KIDNEY_DN                      | 7   | 125 | 16128 | 228  | 3.991965 | 0.001918 |
| yellow      | 6652  | CUI_TCF21_TARGETS_2_UP                       | 48  | 357 | 15896 | 1426 | 1.532453 | 0.001921 |
| salmon      | 6109  | NING_CHRONIC_OBSTRUCTIVE_PULMONARY_DISEASE_  | 5   | 113 | 16140 | 127  | 5.662672 | 0.001928 |
| cyan        | 9865  | GSE360_L_DONOVANI_VS_B_MALAYI_HIGH_DOSE_MA   | 5   | 187 | 16066 | 77   | 5.643795 | 0.001933 |
| red         | 6285  | NEMETH_INFLAMMATORY_RESPONSE_LPS_UP          | 9   | 87  | 16166 | 524  | 3.208673 | 0.001935 |
| red         | 8447  | GSE11057_NAIVE_VS_CENT_MEMORY_CD4_TCELL_DN   | 15  | 198 | 16055 | 524  | 2.349786 | 0.001939 |
| red         | 9367  | GSE22886_NAIVE_BCELL_VS_DC_DN                | 15  | 198 | 16055 | 524  | 2.349786 | 0.001939 |
| cyan        | 213   | PML_BODY                                     | 2   | 14  | 16239 | 77   | 30.15399 | 0.001943 |
| cyan        | 759   | DNA_DAMAGE_RESPONSESIGNAL_TRANSDUCTION_RE    | 2   | 14  | 16239 | 77   | 30.15399 | 0.001943 |
| cyan        | 3547  | MODULE_58                                    | 2   | 14  | 16239 | 77   | 30.15399 | 0.001943 |
| cyan        | 6586  | RUAN_RESPONSE_TO_TNF_TROGLITAZONE_UP         | 2   | 14  | 16239 | 77   | 30.15399 | 0.001943 |
| lightcyan   | 3758  | MODULE_301                                   | 4   | 139 | 16114 | 62   | 7.543746 | 0.001946 |
| lightcyan   | 7705  | NAKAYAMA_SOFT_TISSUE_TUMORS_PCA1_UP          | 3   | 65  | 16188 | 62   | 12.09901 | 0.001951 |
| blue        | 10134 | GSE6269_FLU_VS_E_COLI_INF_PBMC_UP            | 45  | 162 | 16091 | 2978 | 1.516025 | 0.001953 |
| lightyellow | 6283  | BROWN_MYELOID_CELL_DEVELOPMENT_DN            | 3   | 123 | 16130 | 33   | 12.01256 | 0.001955 |
| turquoise   | 1168  | UDP_GLYCOSYLTRANSFERASE_ACTIVITY             | 17  | 34  | 16219 | 4169 | 1.949268 | 0.001958 |
| brown       | 8786  | GSE15930_NAIVE_VS_48H_IN_VITRO_STIM_IFNAB_CD | 38  | 176 | 16077 | 2190 | 1.602361 | 0.001959 |
| brown       | 10085 | GSE3982_EFF_MEMORY_CD4_TCELL_VS_NKCELL_DN    | 38  | 176 | 16077 | 2190 | 1.602361 | 0.001959 |
| cyan        | 8298  | BMI1_DN.V1_UP                                | 4   | 112 | 16141 | 77   | 7.538497 | 0.001964 |
| magenta     | 6936  | HELLER_HDAC_TARGETS_SILENCED_BY_METHYLATION  | 11  | 381 | 15872 | 167  | 2.809861 | 0.001969 |
| turquoise   | 9691  | GSE29618_PRE_VS_DAY7_POST_LAIV_FLU_VACCINE_M | 67  | 190 | 16063 | 4169 | 1.374747 | 0.001971 |
| turquoise   | 5203  | LINDGREN_BLADDER_CANCER_CLUSTER_1_UP         | 43  | 112 | 16141 | 4169 | 1.49676  | 0.001977 |
| cyan        | 9733  | GSE31082_DN_VS_CD4_SP_THYMOCYTE_DN           | 5   | 188 | 16065 | 77   | 5.613775 | 0.001979 |
| turquoise   | 9734  | GSE31082_DN_VS_CD8_SP_THYMOCYTE_UP           | 70  | 200 | 16053 | 4169 | 1.364488 | 0.00198  |
| pink        | 731   | HOMEOSTATIC_PROCESS                          | 8   | 161 | 16092 | 228  | 3.542116 | 0.001984 |
| greenyello  | 8675  | GSE14350_IL2RB_KO_VS_WT_TREG_DN              | 7   | 191 | 16062 | 150  | 3.971065 | 0.001987 |
| greenyello  | 9721  | GSE30083_SP3_VS_SP4_THYMOCYTE_DN             | 7   | 191 | 16062 | 150  | 3.971065 | 0.001987 |
| greenyello  | 9726  | GSE30962_ACUTE_VS_CHRONIC_LCMV_PRIMARY_INF_  | 7   | 191 | 16062 | 150  | 3.971065 | 0.001987 |
| greenyello  | 10207 | GSE7852_LN_VS_FAT_TCONV_DN                   | 7   | 191 | 16062 | 150  | 3.971065 | 0.001987 |
| blue        | 9947  | GSE37416_12H_VS_48H_F_TULARENSIS_LVS_NEUTROI | 47  | 171 | 16082 | 2978 | 1.500067 | 0.001991 |

|             |       |                                              |     |     |       |      |          |          |
|-------------|-------|----------------------------------------------|-----|-----|-------|------|----------|----------|
| purple      | 1989  | GTGGGTGK_UNKNOWN                             | 8   | 234 | 16019 | 157  | 3.539224 | 0.001993 |
| yellow      | 6940  | WONG_MITOCHONDRIA_GENE_MODULE                | 32  | 214 | 16039 | 1426 | 1.704316 | 0.001994 |
| blue        | 2468  | MORF_SNRP70                                  | 21  | 61  | 16192 | 2978 | 1.878877 | 0.001995 |
| brown       | 2860  | KEGG_GNRH_SIGNALING_PATHWAY                  | 21  | 81  | 16172 | 2190 | 1.924083 | 0.001995 |
| magenta     | 5948  | SHEN_SMARCA2_TARGETS_DN                      | 8   | 220 | 16033 | 167  | 3.539031 | 0.001997 |
| pink        | 6361  | VERHAAK_AML_WITH_NPM1_MUTATED_DN             | 10  | 238 | 16015 | 228  | 2.995172 | 0.001997 |
| cyan        | 3692  | MODULE_212                                   | 6   | 277 | 15976 | 77   | 4.572085 | 0.002    |
| brown       | 8313  | RB_DN.V1_DN                                  | 26  | 108 | 16145 | 2190 | 1.786648 | 0.002005 |
| greenyello  | 2230  | YWATTWNNRGCT_UNKNOWN                         | 4   | 58  | 16195 | 150  | 7.472644 | 0.002009 |
| greenyello  | 2637  | GNF2_DNM1                                    | 4   | 58  | 16195 | 150  | 7.472644 | 0.002009 |
| brown       | 1996  | GTGCCTT,MIR-506                              | 114 | 654 | 15599 | 2190 | 1.293649 | 0.002011 |
| yellow      | 2391  | MORF_FBL                                     | 23  | 138 | 16115 | 1426 | 1.899603 | 0.002015 |
| blue        | 6875  | SANSOM_APC_TARGETS                           | 49  | 180 | 16073 | 2978 | 1.485704 | 0.002016 |
| brown       | 8940  | GSE17721_POLYIC_VS_PAM3CSK4_8H_BMDM_UP       | 40  | 188 | 16065 | 2190 | 1.579034 | 0.002017 |
| brown       | 9770  | GSE339_CD4POS_VS_CD4CD8DN_DC_UP              | 40  | 188 | 16065 | 2190 | 1.579034 | 0.002017 |
| magenta     | 8980  | GSE17721_CPG_VS_GARDIQUIMOD_16H_BMDM_UP      | 7   | 172 | 16081 | 167  | 3.960834 | 0.002019 |
| turquoise   | 619   | POST_TRANSLATIONAL_PROTEIN_MODIFICATION      | 137 | 430 | 15823 | 4169 | 1.242092 | 0.002021 |
| magenta     | 8376  | KRAS.LUNG.BREAST_UP.V1_DN                    | 5   | 87  | 16166 | 167  | 5.593296 | 0.002022 |
| pink        | 4498  | REACTOME_TRANSPORT_OF_GLUCOSE_AND_OTHER_S    | 5   | 64  | 16189 | 228  | 5.569147 | 0.002023 |
| cyan        | 8717  | GSE14769_UNSTIM_VS_40MIN_LPS_BMDM_DN         | 5   | 189 | 16064 | 77   | 5.584072 | 0.002025 |
| red         | 4831  | SCHUETZ_BREAST_CANCER_DUCTAL_INVASIVE_UP     | 20  | 303 | 15950 | 524  | 2.047338 | 0.002028 |
| brown       | 5784  | NUYTEN_EZH2_TARGETS_UP                       | 158 | 946 | 15307 | 2190 | 1.239525 | 0.002029 |
| blue        | 8550  | GSE13411_NAIVE_BCELL_VS_PLASMA_CELL_UP       | 51  | 189 | 16064 | 2978 | 1.47271  | 0.002029 |
| brown       | 536   | REGULATION_OF_RAS_PROTEIN_SIGNAL_TRANSDUCTI  | 8   | 19  | 16234 | 2190 | 3.124826 | 0.002032 |
| brown       | 2967  | BIOCARTA_EPO_PATHWAY                         | 8   | 19  | 16234 | 2190 | 3.124826 | 0.002032 |
| brown       | 3071  | BIOCARTA_MAL_PATHWAY                         | 8   | 19  | 16234 | 2190 | 3.124826 | 0.002032 |
| blue        | 8519  | GSE12845_NAIVE_VS_PRE_GC_TONSIL_BCELL_DN     | 53  | 198 | 16055 | 2978 | 1.460897 | 0.002032 |
| lightcyan   | 7733  | YAO_TEMPORAL_RESPONSE_TO_PROGESTERONE_CLU!   | 3   | 66  | 16187 | 62   | 11.91569 | 0.002039 |
| lightcyan   | 8110  | PEDRIOLI_MIR31_TARGETS_DN                    | 6   | 347 | 15906 | 62   | 4.532769 | 0.002039 |
| brown       | 8874  | GSE17721_CTRL_VS_PAM3CSK4_8H_BMDM_UP         | 41  | 194 | 16059 | 2190 | 1.568453 | 0.00204  |
| brown       | 9570  | GSE27786_BCELL_VS_ERYTHROBLAST_UP            | 41  | 194 | 16059 | 2190 | 1.568453 | 0.00204  |
| yellow      | 9919  | GSE36476_YOUNG_VS_OLD_DONOR_MEMORY_CD4_T     | 30  | 197 | 16056 | 1426 | 1.735678 | 0.00204  |
| turquoise   | 8898  | GSE17721_CTRL_VS_GARDIQUIMOD_1H_BMDM_UP      | 63  | 177 | 16076 | 4169 | 1.387615 | 0.002044 |
| turquoise   | 8996  | GSE17721_LPS_VS_PAM3CSK4_12H_BMDM_UP         | 63  | 177 | 16076 | 4169 | 1.387615 | 0.002044 |
| salmon      | 6695  | JIANG_HYPOXIA_NORMAL                         | 8   | 291 | 15962 | 127  | 3.518251 | 0.002046 |
| greenyello  | 9262  | GSE20366_EX_VIVO_VS_DEC205_CONVERSION_UP     | 7   | 192 | 16061 | 150  | 3.950382 | 0.002047 |
| lightyellow | 5148  | GOZGIT_ESR1_TARGETS_UP                       | 3   | 125 | 16128 | 33   | 11.82036 | 0.002047 |
| red         | 5863  | SCHAEFFER_PROSTATE_DEVELOPMENT_48HR_DN       | 21  | 325 | 15928 | 524  | 2.004187 | 0.002053 |
| grey60      | 4482  | REACTOME_GPCR_DOWNSTREAM_SIGNALING           | 5   | 336 | 15917 | 44   | 5.496821 | 0.002055 |
| turquoise   | 8107  | FORTSCHEGGER_PHF8_TARGETS_DN                 | 218 | 718 | 15535 | 4169 | 1.183678 | 0.002057 |
| turquoise   | 4515  | REACTOME_CDT1_ASSOCIATION_WITH_THE_CDC6_OR   | 24  | 54  | 16199 | 4169 | 1.732683 | 0.00207  |
| purple      | 785   | SECOND_MESSENGER_MEDIATED_SIGNALING          | 5   | 93  | 16160 | 157  | 5.565715 | 0.002071 |
| cyan        | 8476  | GSE11864_CSF1_IFNG_VS_CSF1_IFNG_PAM3CYS_IN_M | 5   | 190 | 16063 | 77   | 5.554682 | 0.002072 |
| turquoise   | 10036 | GSE3982_MAC_VS_EFF_MEMORY_CD4_TCELL_UP       | 69  | 197 | 16056 | 4169 | 1.365477 | 0.002078 |
| yellow      | 46    | MITOCHONDRIAL_MEMBRANE                       | 16  | 83  | 16170 | 1426 | 2.197131 | 0.002079 |
| salmon      | 5155  | HAHTOLA_MYCOSIS_FUNGOIDES_CD4_DN             | 5   | 115 | 16138 | 127  | 5.56419  | 0.002082 |
| purple      | 1758  | CTGRYYYYNATT_UNKNOWN                         | 4   | 56  | 16197 | 157  | 7.394449 | 0.002083 |
| yellow      | 5500  | LUI_TARGETS_OF_PAX8_PPARG_FUSION             | 9   | 34  | 16219 | 1426 | 3.017016 | 0.002092 |
| lightyellow | 7914  | WIERENGA_STAT5A_TARGETS_GROUP1               | 3   | 126 | 16127 | 33   | 11.72655 | 0.002094 |
| lightcyan   | 6440  | MARCHINI TRABECTEDIN_RESISTANCE_UP           | 2   | 18  | 16235 | 62   | 29.12724 | 0.002106 |
| pink        | 7574  | MIKKELSEN_IPS_WITH_HCP_H3K27ME3              | 4   | 39  | 16214 | 228  | 7.311291 | 0.002111 |
| turquoise   | 2111  | TACAATC,MIR-508                              | 25  | 57  | 16196 | 4169 | 1.709885 | 0.002112 |
| turquoise   | 4440  | REACTOME_G1_S_TRANSITION                     | 41  | 106 | 16147 | 4169 | 1.507925 | 0.002112 |
| red         | 8100  | ALFANO_MYC_TARGETS                           | 16  | 220 | 16033 | 524  | 2.255795 | 0.002116 |
| blue        | 1433  | DNA_BINDING                                  | 119 | 509 | 15744 | 2978 | 1.275963 | 0.002116 |
| cyan        | 9129  | GSE17721_0.5H_VS_4H_CPG_BMDM_DN              | 5   | 191 | 16062 | 77   | 5.5256   | 0.00212  |
| red         | 8260  | MEK_UP.V1_UP                                 | 14  | 180 | 16073 | 524  | 2.412447 | 0.002123 |
| turquoise   | 3497  | MODULE_4                                     | 12  | 21  | 16232 | 4169 | 2.227735 | 0.002129 |
| turquoise   | 7077  | BONOME_OVARIAN_CANCER_POOR_SURVIVAL_DN       | 12  | 21  | 16232 | 4169 | 2.227735 | 0.002129 |
| magenta     | 7704  | WONG_ADULT_TISSUE_STEM_MODULE                | 15  | 629 | 15624 | 167  | 2.320907 | 0.00213  |

|            |                                                   |    |     |       |      |          |          |
|------------|---------------------------------------------------|----|-----|-------|------|----------|----------|
| magenta    | 291 SYNAPTOGENESIS                                | 2  | 7   | 16246 | 167  | 27.80667 | 0.00213  |
| grey60     | 951 G_PROTEIN_COUPLED_RECEPTOR_PROTEIN_SIGNALING  | 4  | 202 | 16051 | 44   | 7.314581 | 0.002131 |
| red        | 292 JAK_STAT_CASCADE                              | 5  | 29  | 16224 | 524  | 5.347789 | 0.002137 |
| brown      | 5395 PEREZ_TP53_AND_TP63_TARGETS                  | 37 | 171 | 16082 | 2190 | 1.605813 | 0.002141 |
| salmon     | 6425 JIANG_AGING_CEREBRAL_CORTEX_UP               | 3  | 33  | 16220 | 127  | 11.63422 | 0.002142 |
| salmon     | 6477 HU_GENOTOXIC_DAMAGE_24HR                     | 3  | 33  | 16220 | 127  | 11.63422 | 0.002142 |
| yellow     | 9152 GSE17974_0H_VS_1H_IN_VITRO_ACT_CD4_TCELL_UP  | 27 | 172 | 16081 | 1426 | 1.789161 | 0.002143 |
| purple     | 1874 V\$GATA_Q6                                   | 6  | 137 | 16116 | 157  | 4.533823 | 0.002146 |
| purple     | 6633 RODWELL_AGING_KIDNEY_NO_BLOOD_UP             | 7  | 185 | 16068 | 157  | 3.91706  | 0.002149 |
| greenyello | 549 CELL_CELL_SIGNALING                           | 8  | 248 | 16005 | 150  | 3.495269 | 0.00215  |
| yellow     | 1921 V\$E2F1_Q3_01                                | 32 | 215 | 16038 | 1426 | 1.696389 | 0.00215  |
| turquoise  | 4140 REACTOME_SIGNALING_BY_WNT                    | 27 | 63  | 16190 | 4169 | 1.670801 | 0.002157 |
| blue       | 9436 GSE24634_NAIVE_CD4_TCELL_VS_DAY7_IL4_CONV_TR | 52 | 194 | 16059 | 2978 | 1.462886 | 0.002157 |
| turquoise  | 1152 TRANSFERASE_ACTIVITY_TRANSFERRING_HEXOSYL_GR | 29 | 69  | 16184 | 4169 | 1.638515 | 0.002158 |
| turquoise  | 2523 GCM_HBP1                                     | 29 | 69  | 16184 | 4169 | 1.638515 | 0.002158 |
| turquoise  | 3440 chr15q21                                     | 29 | 69  | 16184 | 4169 | 1.638515 | 0.002158 |
| turquoise  | 4658 REACTOME_NFKB_AND_MAP_KINASES_ACTIVATION_N   | 29 | 69  | 16184 | 4169 | 1.638515 | 0.002158 |
| turquoise  | 4077 PID_P38ALPHABETADOWNSTREAMPATHWAY            | 18 | 37  | 16216 | 4169 | 1.896585 | 0.002158 |
| turquoise  | 8176 GHANDHI_BYSTANDER_IRRADIATION_UP             | 28 | 66  | 16187 | 4169 | 1.653925 | 0.002162 |
| green      | 1242 NEUROTRANSMITTER_BINDING                     | 7  | 24  | 16229 | 1305 | 3.632535 | 0.002167 |
| turquoise  | 10252 GSE9037_WT_VS_IRAK4_KO_LPS_4H_STIM_BMDM_UF  | 65 | 184 | 16069 | 4169 | 1.377201 | 0.002168 |
| cyan       | 8687 GSE1460_INTRATHYMIC_T_PROGENITOR_VS_CD4_THY  | 5  | 192 | 16061 | 77   | 5.496821 | 0.002169 |
| cyan       | 9791 GSE34205_RSV_VS_FLU_INF_INFANT_PBMC_DN       | 5  | 192 | 16061 | 77   | 5.496821 | 0.002169 |
| green      | 1278 G_PROTEIN_COUPLED_RECEPTOR_ACTIVITY          | 17 | 99  | 16154 | 1305 | 2.138635 | 0.00217  |
| greenyello | 2806 KEGG_CYTOKINE_CYTOKINE_RECEPTOR_INTERACTION  | 7  | 194 | 16059 | 150  | 3.909656 | 0.00217  |
| midnightb  | 4788 REACTOME_SYNTHESIS_OF_GLYCOSYLPHOSPHATIDYLIN | 2  | 16  | 16237 | 71   | 28.61444 | 0.00217  |
| brown      | 9291 GSE20715_0H_VS_24H_OZONE_LUNG_DN             | 38 | 177 | 16076 | 2190 | 1.593308 | 0.002177 |
| turquoise  | 8945 GSE17721_POLYIC_VS_PAM3CSK4_16H_BMDM_DN      | 68 | 194 | 16059 | 4169 | 1.366497 | 0.00218  |
| turquoise  | 8997 GSE17721_LPS_VS_PAM3CSK4_12H_BMDM_DN         | 68 | 194 | 16059 | 4169 | 1.366497 | 0.00218  |
| turquoise  | 9470 GSE25087_TREG_VS_TCONV_ADULT_UP              | 68 | 194 | 16059 | 4169 | 1.366497 | 0.00218  |
| turquoise  | 9941 GSE37416_0H_VS_24H_F_TULARENSIS_LVS_NEUTROPI | 68 | 194 | 16059 | 4169 | 1.366497 | 0.00218  |
| purple     | 282 G_PROTEIN_SIGNALING_COUPLED_TO_IP3_SECOND_M   | 3  | 27  | 16226 | 157  | 11.50248 | 0.002182 |
| green      | 7439 MEISSNER_NPC_HCP_WITH_H3_UNMETHYLATED        | 48 | 392 | 15861 | 1305 | 1.525029 | 0.00219  |
| lightgreen | 1233 CHEMOKINE_ACTIVITY                           | 2  | 27  | 16226 | 42   | 28.6649  | 0.002196 |
| brown      | 2875 KEGG_VIBRIO_CHOLERAЕ_INFECTION               | 14 | 46  | 16207 | 2190 | 2.258706 | 0.002199 |
| brown      | 985 REGULATION_OF_APOPTOSIS                       | 60 | 310 | 15943 | 2190 | 1.436412 | 0.002199 |
| lightcyan  | 6320 PETROVA_ENDOTHELIUM_LYMPHATIC_VS_BLOOD_DN    | 4  | 144 | 16109 | 62   | 7.28181  | 0.002214 |
| lightcyan  | 2686 GNF2_PTPRC                                   | 3  | 68  | 16185 | 62   | 11.56523 | 0.002221 |
| purple     | 2888 KEGG_MELANOMA                                | 4  | 57  | 16196 | 157  | 7.264722 | 0.002224 |
| purple     | 5787 INGRAM_SHH_TARGETS_DN                        | 4  | 57  | 16196 | 157  | 7.264722 | 0.002224 |
| purple     | 6678 BURTON_ADIPOGENESIS_PEAK_AT_0HR              | 4  | 57  | 16196 | 157  | 7.264722 | 0.002224 |
| blue       | 2351 MORF_AP3D1                                   | 37 | 128 | 16125 | 2978 | 1.577613 | 0.002233 |
| brown      | 8553 GSE13411_NAIVE_VS_MEMORY_BCELL_DN            | 40 | 189 | 16064 | 2190 | 1.57068  | 0.002233 |
| grey60     | 1045 NITROGEN_COMPOUND_CATABOLIC_PROCESS          | 2  | 26  | 16227 | 44   | 28.41434 | 0.002234 |
| red        | 8479 GSE11864_CSF1_PAM3CYS_VS_CSF1_IFNG_PAM3CYS_  | 14 | 181 | 16072 | 524  | 2.399119 | 0.002235 |
| red        | 8569 GSE13484_12H_UNSTIM_VS_YF17D_VACCINE_STIM_PI | 14 | 181 | 16072 | 524  | 2.399119 | 0.002235 |
| cyan       | 3618 MODULE_130                                   | 2  | 15  | 16238 | 77   | 28.14372 | 0.002235 |
| cyan       | 3708 MODULE_236                                   | 2  | 15  | 16238 | 77   | 28.14372 | 0.002235 |
| pink       | 188 CORTICAL_CYTOSKELETON                         | 3  | 19  | 16234 | 228  | 11.25554 | 0.002236 |
| pink       | 5156 HAHTOLA_MYCOSIS_FUNGOIDES_UP                 | 3  | 19  | 16234 | 228  | 11.25554 | 0.002236 |
| lightgreen | 8129 BOSCO_TH1_CYTOTOXIC_MODULE                   | 3  | 101 | 16152 | 42   | 11.49434 | 0.002243 |
| cyan       | 6490 CHANG_IMMORTALIZED_BY_HPV31_DN               | 3  | 55  | 16198 | 77   | 11.51334 | 0.002247 |
| magenta    | 8277 PKCA_DN.V1_DN                                | 6  | 130 | 16123 | 167  | 4.491847 | 0.002248 |
| blue       | 703 REGULATION_OF_TRANSCRIPTIONDNA_DEPENDENT      | 97 | 404 | 15849 | 2978 | 1.310386 | 0.002248 |
| lightgreen | 459 DEFENSE_RESPONSE                              | 4  | 215 | 16038 | 42   | 7.199557 | 0.002248 |
| salmon     | 9342 GSE22886_IGM_MEMORY_BCELL_VS_BLOOD_PLASMA    | 6  | 171 | 16082 | 127  | 4.490399 | 0.00225  |
| brown      | 7397 LEE_DIFFERENTIATING_T_LYMPHOCYTE             | 41 | 195 | 16058 | 2190 | 1.56041  | 0.002254 |
| brown      | 8890 GSE17721_CTRL_VS_CPG_8H_BMDM_UP              | 41 | 195 | 16058 | 2190 | 1.56041  | 0.002254 |
| lightcyan  | 4827 ONKEN_UVEAL_MELANOMA_UP                      | 9  | 761 | 15492 | 62   | 3.100271 | 0.002257 |
| yellow     | 2417 MORF_MAP2K2                                  | 22 | 131 | 16122 | 1426 | 1.914103 | 0.00226  |



|             |                                                    |     |      |       |      |          |          |
|-------------|----------------------------------------------------|-----|------|-------|------|----------|----------|
| brown       | 4493 REACTOME_SEMAPHORIN_INTERACTIONS              | 17  | 61   | 16192 | 2190 | 2.068276 | 0.002266 |
| red         | 3616 MODULE_128                                    | 9   | 89   | 16164 | 524  | 3.136568 | 0.002266 |
| cyan        | 9207 GSE17974_1H_VS_72H_UNTREATED_IN_VITRO_CD4_T   | 5   | 194  | 16059 | 77   | 5.440153 | 0.002269 |
| cyan        | 9553 GSE27786_LIN_NEG_VS_NKCELL_DN                 | 5   | 194  | 16059 | 77   | 5.440153 | 0.002269 |
| lightcyan   | 3710 MODULE_238                                    | 4   | 145  | 16108 | 62   | 7.231591 | 0.00227  |
| lightcyan   | 7580 MIKKELSEN_IPS_LCP_WITH_H3K4ME3                | 4   | 145  | 16108 | 62   | 7.231591 | 0.00227  |
| turquoise   | 9119 GSE17721_0.5H_VS_8H_PAM3CSK4_BMDM_DN          | 64  | 181  | 16072 | 4169 | 1.378488 | 0.002274 |
| purple      | 6856 GAVIN_FOXP3_TARGETS_CLUSTER_P4                | 5   | 95   | 16158 | 157  | 5.448542 | 0.002274 |
| red         | 5895 AMIT_DELAYED_EARLY_GENES                      | 4   | 18   | 16235 | 524  | 6.892706 | 0.00228  |
| brown       | 5601 DIRMEIER_LMP1_RESPONSE_LATE_UP                | 16  | 56   | 16197 | 2190 | 2.120417 | 0.002282 |
| purple      | 9414 GSE24142_EARLY_THYMIC_PROGENITOR_VS_DN2_THY   | 7   | 187  | 16066 | 157  | 3.875166 | 0.002283 |
| greenyello  | 6284 ROETH_TERT_TARGETS_DN                         | 2   | 8    | 16245 | 150  | 27.08833 | 0.002284 |
| midnightb   | 5942 AMIT_SERUM_RESPONSE_120_MCF10A                | 3   | 60   | 16193 | 71   | 11.44577 | 0.002287 |
| turquoise   | 2291 MORF_ATRX                                     | 67  | 191  | 16062 | 4169 | 1.36755  | 0.002288 |
| turquoise   | 8470 GSE11864_CSF1_VS_CSF1_PAM3CYS_IN_MAC_UP       | 67  | 191  | 16062 | 4169 | 1.36755  | 0.002288 |
| turquoise   | 8959 GSE17721_PAM3CSK4_VS_CPG_8H_BMDM_DN           | 67  | 191  | 16062 | 4169 | 1.36755  | 0.002288 |
| turquoise   | 9899 GSE36392_EOSINOPHIL_VS_NEUTROPHIL_IL25_TREATE | 67  | 191  | 16062 | 4169 | 1.36755  | 0.002288 |
| lightyellow | 5015 TAKEDA_TARGETS_OF_NUP98_HOXA9_FUSION_10D_D    | 3   | 130  | 16123 | 33   | 11.36573 | 0.002289 |
| blue        | 8653 GSE14308_NAIVE_CD4_TCELL_VS_INDUCED_TREG_DN   | 51  | 190  | 16063 | 2978 | 1.464959 | 0.002289 |
| blue        | 9971 GSE3982_EOSINOPHIL_VS_MAST_CELL_DN            | 51  | 190  | 16063 | 2978 | 1.464959 | 0.002289 |
| turquoise   | 7870 LU_EZH2_TARGETS_DN                            | 118 | 365  | 15888 | 4169 | 1.260349 | 0.0023   |
| blue        | 2594 GNF2_MSH2                                     | 12  | 28   | 16225 | 2978 | 2.33901  | 0.002302 |
| yellow      | 9514 GSE2706_R848_VS_R848_AND_LPS_2H_STIM_DC_UP    | 25  | 156  | 16097 | 1426 | 1.826541 | 0.002305 |
| green       | 6770 MAHAJAN_RESPONSE_TO_IL1A_UP                   | 13  | 67   | 16186 | 1305 | 2.416527 | 0.002305 |
| pink        | 4933 DOANE_RESPONSE_TO_ANDROGEN_UP                 | 8   | 165  | 16088 | 228  | 3.456247 | 0.002313 |
| yellow      | 7983 KASLER_HDAC7_TARGETS_1_UP                     | 29  | 190  | 16063 | 1426 | 1.739636 | 0.002317 |
| pink        | 5382 RIZ_ERYTHROID_DIFFERENTIATION_CCNE1           | 4   | 40   | 16213 | 228  | 7.128509 | 0.00232  |
| cyan        | 8590 GSE13485_DAY3_VS_DAY21_YF17D_VACCINE_PBMC_U   | 5   | 195  | 16058 | 77   | 5.412254 | 0.00232  |
| cyan        | 9449 GSE24634_TEFF_VS_TCONV_DAY3_IN_CULTURE_DN     | 5   | 195  | 16058 | 77   | 5.412254 | 0.00232  |
| cyan        | 10052 GSE3982_NEUTROPHIL_VS_CENT_MEMORY_CD4_TCEL   | 5   | 195  | 16058 | 77   | 5.412254 | 0.00232  |
| red         | 5733 SPIELMAN_LYMPHOBLAST_EUROPEAN_VS_ASIAN_DN     | 32  | 581  | 15672 | 524  | 1.708347 | 0.002322 |
| blue        | 2481 MORF_USP5                                     | 18  | 50   | 16203 | 2978 | 1.964768 | 0.002324 |
| turquoise   | 6028 TCGA_GLIOMASTOMA_COPY_NUMBER_DN               | 15  | 29   | 16224 | 4169 | 2.016485 | 0.002331 |
| brown       | 9862 GSE360_L_DONOVANI_VS_T_GONDII_MAC_UP          | 36  | 166  | 16087 | 2190 | 1.609474 | 0.00234  |
| lightcyan   | 6700 SARTIPY_BLUNTED_BY_INSULIN_RESISTANCE_UP      | 2   | 19   | 16234 | 62   | 27.59423 | 0.002348 |
| lightcyan   | 7526 CHIANG_LIVER_CANCER_SUBCLASS_INTERFERON_UP    | 2   | 19   | 16234 | 62   | 27.59423 | 0.002348 |
| turquoise   | 8498 GSE12366_PLASMA_CELL_VS_NAIVE_BCELL_UP        | 60  | 168  | 16085 | 4169 | 1.392335 | 0.002351 |
| turquoise   | 10164 GSE7460_TREG_VS_TCONV_ACT_WITH_TGFB_UP       | 60  | 168  | 16085 | 4169 | 1.392335 | 0.002351 |
| red         | 10078 GSE3982_BASOPHIL_VS_TH1_UP                   | 14  | 182  | 16071 | 524  | 2.385937 | 0.002351 |
| blue        | 2553 GCM_RING1                                     | 27  | 86   | 16167 | 2978 | 1.713461 | 0.002356 |
| greenyello  | 3597 MODULE_109                                    | 3   | 29   | 16224 | 150  | 11.20897 | 0.002361 |
| lightgreen  | 1268 CHEMOKINE_RECEPTOR_BINDING                    | 2   | 28   | 16225 | 42   | 27.64116 | 0.002361 |
| lightgreen  | 7480 VALK_AML_CLUSTER_3                            | 2   | 28   | 16225 | 42   | 27.64116 | 0.002361 |
| greenyello  | 9185 GSE17974_CTRL_VS_ACT_IL4_AND_ANTI_IL12_72H_CC | 7   | 197  | 16056 | 150  | 3.850118 | 0.002366 |
| brown       | 5190 CHIARADONNA_NEOPLASTIC_TRANSFORMATION_CDC;    | 32  | 143  | 16110 | 2190 | 1.660747 | 0.002366 |
| greenyello  | 3503 MODULE_11                                     | 11  | 435  | 15818 | 150  | 2.739969 | 0.00237  |
| tan         | 4323 REACTOME_GENERIC_TRANSCRIPTION_PATHWAY        | 9   | 321  | 15932 | 145  | 3.142701 | 0.002371 |
| salmon      | 2345 MORF_XRCC5                                    | 7   | 233  | 16020 | 127  | 3.844784 | 0.002371 |
| pink        | 1672 V\$GATA1_05                                   | 9   | 204  | 16049 | 228  | 3.14493  | 0.002391 |
| yellow      | 39 SPINDLE_POLE                                    | 6   | 17   | 16236 | 1426 | 4.022688 | 0.002392 |
| purple      | 8303 NOTCH_DN.V1_DN                                | 6   | 140  | 16113 | 157  | 4.43667  | 0.002393 |
| turquoise   | 8940 GSE17721_POLYIC_VS_PAM3CSK4_8H_BMDM_UP        | 66  | 188  | 16065 | 4169 | 1.368635 | 0.002401 |
| magenta     | 8188 ZWANG_TRANSIENTLY_UP_BY_2ND_EGF_PULSE_ONLY    | 21  | 1044 | 15209 | 167  | 1.957654 | 0.002402 |
| turquoise   | 6881 RIGGINS_TAMOXIFEN_RESISTANCE_DN               | 69  | 198  | 16055 | 4169 | 1.358581 | 0.002402 |
| turquoise   | 8519 GSE12845_NAIVE_VS_PRE_GC_TONSIL_BCELL_DN      | 69  | 198  | 16055 | 4169 | 1.358581 | 0.002402 |
| turquoise   | 4578 REACTOME_POST_TRANSLATIONAL_PROTEIN_MODIFIC   | 56  | 155  | 16098 | 4169 | 1.408504 | 0.002404 |
| blue        | 4942 LAIHO_COLORECTAL_CANCER_SERRATED_DN           | 26  | 82   | 16171 | 2978 | 1.730487 | 0.002409 |
| turquoise   | 2387 MORF_ERH                                      | 43  | 113  | 16140 | 4169 | 1.483514 | 0.002412 |
| turquoise   | 4985 GINESTIER_BREAST_CANCER_20Q13_AMPLIFICATION_I | 43  | 113  | 16140 | 4169 | 1.483514 | 0.002412 |
| lightyellow | 6404 TRAYNOR_RETT_SYNDROM_UP                       | 2   | 36   | 16217 | 33   | 27.36195 | 0.002412 |

|             |                                                  |     |      |       |      |          |          |
|-------------|--------------------------------------------------|-----|------|-------|------|----------|----------|
| lightcyan   | 7294 SEKI_INFLAMMATORY_RESPONSE_LPS_UP           | 3   | 70   | 16183 | 62   | 11.23479 | 0.002413 |
| red         | 274 HEMOSTASIS                                   | 6   | 43   | 16210 | 524  | 4.327978 | 0.002414 |
| red         | 1422 CYTOKINE_BINDING                            | 6   | 43   | 16210 | 524  | 4.327978 | 0.002414 |
| red         | 6191 LEE_LIVER_CANCER_MYC_DN                     | 6   | 43   | 16210 | 524  | 4.327978 | 0.002414 |
| red         | 4928 CHARAFE_BREAST_CANCER_LUMINAL_VS_MESENCHYM  | 25  | 419  | 15834 | 524  | 1.850667 | 0.002415 |
| brown       | 9884 GSE360_HIGH_VS_LOW_DOSE_B_MALAYI_MAC_UP     | 38  | 178  | 16075 | 2190 | 1.584357 | 0.002417 |
| turquoise   | 5207 LINDGREN_BLADDER_CANCER_CLUSTER_3_UP        | 104 | 317  | 15936 | 4169 | 1.279015 | 0.002418 |
| purple      | 9410 GSE24142_EARLY_THYMIC_PROGENITOR_VS_DN3_THY | 7   | 189  | 16064 | 157  | 3.834159 | 0.002423 |
| red         | 7648 HOSHIDA_LIVER_CANCER_SUBCLASS_S1            | 16  | 223  | 16030 | 524  | 2.225448 | 0.002425 |
| magenta     | 6083 PENG_LEUCINE_DEPRIVATION_UP                 | 6   | 132  | 16121 | 167  | 4.423789 | 0.002427 |
| greenyello  | 8447 GSE11057_NAIVE_VS_CENT_MEMORY_CD4_TCELL_DN  | 7   | 198  | 16055 | 150  | 3.830673 | 0.002434 |
| lightgreen  | 3865 MODULE_456                                  | 3   | 104  | 16149 | 42   | 11.16277 | 0.002438 |
| magenta     | 6965 MASSARWEH_RESPONSE_TO ESTRADIOL             | 4   | 55   | 16198 | 167  | 7.078062 | 0.002439 |
| blue        | 5238 GRAESSMANN_APOPTOSIS_BY_DOXORUBICIN_DN      | 356 | 1705 | 14548 | 2978 | 1.139553 | 0.00244  |
| lightcyan   | 8220 AKT_UP.V1_UP                                | 4   | 148  | 16105 | 62   | 7.085004 | 0.002445 |
| brown       | 8948 GSE17721_PAM3CSK4_VS_CPG_0.5H_BMDM_UP       | 39  | 184  | 16069 | 2190 | 1.573027 | 0.002446 |
| brown       | 9082 GSE17721_LPS_VS_GARDIQUIMOD_6H_BMDM_UP      | 39  | 184  | 16069 | 2190 | 1.573027 | 0.002446 |
| brown       | 9735 GSE31082_DN_VS_CD8_SP_THYMOCYTE_DN          | 39  | 184  | 16069 | 2190 | 1.573027 | 0.002446 |
| brown       | 10070 GSE3982_BCELL_VS_TH2_UP                    | 39  | 184  | 16069 | 2190 | 1.573027 | 0.002446 |
| lightyellow | 3605 MODULE_117                                  | 5   | 472  | 15781 | 33   | 5.217322 | 0.002451 |
| magenta     | 7171 RAY_TUMORIGENESIS_BY_ERBB2_CDC25A_UP        | 5   | 91   | 16162 | 167  | 5.347437 | 0.002463 |
| green       | 7699 DORN_ADENOVIRUS_INFECTION_48HR_UP           | 5   | 13   | 16240 | 1305 | 4.790156 | 0.002466 |
| brown       | 5723 TOMLINS_PROSTATE_CANCER_DN                  | 12  | 37   | 16216 | 2190 | 2.40696  | 0.002469 |
| turquoise   | 1972 CAGTGTT,MIR-141,MIR-200A                    | 92  | 276  | 15977 | 4169 | 1.299512 | 0.002476 |
| cyan        | 6881 RIGGINS_TAMOXIFEN_RESISTANCE_DN             | 5   | 198  | 16055 | 77   | 5.330251 | 0.002479 |
| cyan        | 9357 GSE22886_DC_VS_MONOCYTE_DN                  | 5   | 198  | 16055 | 77   | 5.330251 | 0.002479 |
| brown       | 3161 chr12q24                                    | 41  | 196  | 16057 | 2190 | 1.552449 | 0.002487 |
| brown       | 9606 GSE27786_NKTCELL_VS_ERYTHROBLAST_UP         | 41  | 196  | 16057 | 2190 | 1.552449 | 0.002487 |
| blue        | 2562 GCM_UBE2N                                   | 43  | 155  | 16098 | 2978 | 1.514069 | 0.002491 |
| blue        | 5504 SCHLOSSER_MYC_TARGETS_REPRESSED_BY_SERUM    | 43  | 155  | 16098 | 2978 | 1.514069 | 0.002491 |
| magenta     | 3698 MODULE_220                                  | 8   | 228  | 16025 | 167  | 3.414855 | 0.002492 |
| red         | 7878 DUTERTRE ESTRADIOL_RESPONSE_24HR_DN         | 27  | 466  | 15787 | 524  | 1.797132 | 0.002493 |
| red         | 3730 MODULE_263                                  | 5   | 30   | 16223 | 524  | 5.169529 | 0.002498 |
| purple      | 1436 CYCLASE_ACTIVITY                            | 2   | 8    | 16245 | 157  | 25.88057 | 0.002499 |
| purple      | 4810 LU_TUMOR_VASCULATURE_DN                     | 2   | 8    | 16245 | 157  | 25.88057 | 0.002499 |
| brown       | 1852 V\$SREBP1_Q6                                | 42  | 202  | 16051 | 2190 | 1.543076 | 0.0025   |
| blue        | 6449 RHODES_CANCER_META_SIGNATURE                | 21  | 62   | 16191 | 2978 | 1.848572 | 0.002504 |
| brown       | 8015 TERA0_AOX4_TARGETS_HG_UP                    | 10  | 28   | 16225 | 2190 | 2.650522 | 0.002509 |
| blue        | 2808 KEGG_PHOSPHATIDYLINOSITOL_SIGNALING_SYSTEM  | 23  | 70   | 16183 | 2978 | 1.793241 | 0.00251  |
| lightcyan   | 7736 YAO_TEMPORAL_RESPONSE_TO_PROGESTERONE_CLU!  | 3   | 71   | 16182 | 62   | 11.07656 | 0.002512 |
| brown       | 5089 KINSEY_TARGETS_OF_EWSR1_FLII_FUSION_DN      | 56  | 287  | 15966 | 2190 | 1.44809  | 0.002514 |
| greenyello  | 10063 GSE3982_BCELL_VS_EFF_MEMORY_CD4_TCELL_DN   | 6   | 148  | 16105 | 150  | 4.392703 | 0.002516 |
| green       | 2296 MORF_BCL2L11                                | 21  | 135  | 16118 | 1305 | 1.937352 | 0.002516 |
| turquoise   | 8632 GSE14308_TH2_VS_NAIVE_CD4_TCELL_UP          | 65  | 185  | 16068 | 4169 | 1.369756 | 0.002519 |
| lightcyan   | 7145 BOQUEST_STEM_CELL_CULTURED_VS_FRESH_UP      | 6   | 362  | 15891 | 62   | 4.344947 | 0.00252  |
| red         | 1309 MAGNESIUM_ION_BINDING                       | 7   | 58   | 16195 | 524  | 3.743452 | 0.00252  |
| pink        | 3169 chr19p13                                    | 15  | 467  | 15786 | 228  | 2.289671 | 0.002522 |
| purple      | 6339 PETROVA_PROX1_TARGETS_DN                    | 4   | 59   | 16194 | 157  | 7.018461 | 0.002524 |
| purple      | 6547 LINDVALL_IMMORTALIZED_BY_TERT_DN            | 4   | 59   | 16194 | 157  | 7.018461 | 0.002524 |
| magenta     | 8968 GSE17721_CPG_VS_GARDIQUIMOD_1H_BMDM_UP      | 7   | 179  | 16074 | 167  | 3.805941 | 0.002527 |
| magenta     | 9823 GSE360_DC_VS_MAC_T_GONDII_DN                | 7   | 179  | 16074 | 167  | 3.805941 | 0.002527 |
| lightgreen  | 3584 MODULE_96                                   | 2   | 29   | 16224 | 42   | 26.68801 | 0.002532 |
| lightgreen  | 3597 MODULE_109                                  | 2   | 29   | 16224 | 42   | 26.68801 | 0.002532 |
| purple      | 3515 MODULE_23                                   | 11  | 419  | 15834 | 157  | 2.717769 | 0.002535 |
| greenyello  | 593 INFLAMMATORY_RESPONSE                        | 5   | 102  | 16151 | 150  | 5.311438 | 0.002544 |
| lightcyan   | 7863 CHICAS_RB1_TARGETS_CONFLUENT                | 7   | 490  | 15763 | 62   | 3.744931 | 0.002546 |
| cyan        | 3000 BIOCARTA_IL10_PATHWAY                       | 2   | 16   | 16237 | 77   | 26.38474 | 0.002547 |
| cyan        | 3062 BIOCARTA_PML_PATHWAY                        | 2   | 16   | 16237 | 77   | 26.38474 | 0.002547 |
| salmon      | 6262 MOREAUX_B_LYMPHOCYTE_MATURATION_BY_TACI_D   | 4   | 73   | 16180 | 127  | 7.012404 | 0.002553 |
| red         | 3773 MODULE_321                                  | 10  | 108  | 16145 | 524  | 2.871961 | 0.002555 |

|            |       |                                              |    |      |       |      |          |          |
|------------|-------|----------------------------------------------|----|------|-------|------|----------|----------|
| brown      | 2807  | KEGG_CHEMOKINE_SIGNALING_PATHWAY             | 35 | 161  | 16092 | 2190 | 1.613361 | 0.002557 |
| red        | 5174  | ENK_UV_RESPONSE_EPIDERMIS_DN                 | 27 | 467  | 15786 | 524  | 1.793284 | 0.002569 |
| purple     | 8367  | KRAS.600_UP.V1_UP                            | 7  | 191  | 16062 | 157  | 3.794011 | 0.00257  |
| salmon     | 2398  | MORF_GNB1                                    | 8  | 302  | 15951 | 127  | 3.390103 | 0.002573 |
| salmon     | 4943  | BORCZUK_MALIGNANT_MESOTHELIOMA_UP            | 8  | 302  | 15951 | 127  | 3.390103 | 0.002573 |
| red        | 3576  | MODULE_88                                    | 34 | 633  | 15620 | 524  | 1.666009 | 0.002576 |
| blue       | 2550  | GCM_RAN                                      | 51 | 191  | 16062 | 2978 | 1.457289 | 0.002578 |
| blue       | 8828  | GSE17580_UNINFECTED_VS_S_MANSONI_INF_TEFF_UI | 51 | 191  | 16062 | 2978 | 1.457289 | 0.002578 |
| yellow     | 8787  | GSE15930_NAIVE_VS_48H_IN_VITRO_STIM_IFNAB_CD | 30 | 200  | 16053 | 1426 | 1.709642 | 0.002578 |
| magenta    | 5024  | HOEBEKE_LYMPHOID_STEM_CELL_UP                | 5  | 92   | 16161 | 167  | 5.289313 | 0.002583 |
| magenta    | 7151  | LABBE_TARGETS_OF_TGFB1_AND_WNT3A_UP          | 5  | 92   | 16161 | 167  | 5.289313 | 0.002583 |
| red        | 6864  | MARSON_BOUND_BY_FOXP3_UNSTIMULATED           | 55 | 1161 | 15092 | 524  | 1.469375 | 0.002586 |
| grey60     | 1102  | SUGAR_BINDING                                | 2  | 28   | 16225 | 44   | 26.38474 | 0.002589 |
| tan        | 8352  | KRAS.DF.V1_DN                                | 6  | 154  | 16099 | 145  | 4.367129 | 0.00259  |
| salmon     | 8643  | GSE14308_TH1_VS_INDUCED_TREG_DN              | 6  | 176  | 16077 | 127  | 4.362831 | 0.002599 |
| salmon     | 10039 | GSE3982_MAC_VS_CENT_MEMORY_CD4_TCELL_DN      | 6  | 176  | 16077 | 127  | 4.362831 | 0.002599 |
| brown      | 6558  | CHEN_LVAD_SUPPORT_OF_FAILING_HEART_UP        | 22 | 88   | 16165 | 2190 | 1.855365 | 0.002599 |
| red        | 9761  | GSE3337_CTRL_VS_4H_IFNG_IN_CD8POS_DC_DN      | 14 | 184  | 16069 | 524  | 2.360002 | 0.0026   |
| greenyello | 8271  | JNK_DN.V1_DN                                 | 6  | 149  | 16104 | 150  | 4.363221 | 0.002602 |
| lightcyan  | 4630  | REACTOME_TRAF6_MEDIATED_NFKB_ACTIVATION      | 2  | 20   | 16233 | 62   | 26.21452 | 0.002603 |
| yellow     | 4850  | SOTIRIOU_BREAST_CANCER_GRADE_1_VS_3_UP       | 24 | 149  | 16104 | 1426 | 1.835858 | 0.002603 |
| turquoise  | 8123  | RAO_BOUND_BY_SALL4_ISOFORM_A                 | 46 | 123  | 16130 | 4169 | 1.457989 | 0.002604 |
| turquoise  | 94    | PEROXISOMAL_PART                             | 9  | 14   | 16239 | 4169 | 2.506202 | 0.002604 |
| turquoise  | 162   | MICROBODY_PART                               | 9  | 14   | 16239 | 4169 | 2.506202 | 0.002604 |
| turquoise  | 1065  | PROTEIN_PHOSPHATASE_TYPE_2A_REGULATOR_ACTIV  | 9  | 14   | 16239 | 4169 | 2.506202 | 0.002604 |
| pink       | 3505  | MODULE_13                                    | 14 | 422  | 15831 | 228  | 2.364908 | 0.002604 |
| magenta    | 9760  | GSE3337_CTRL_VS_4H_IFNG_IN_CD8POS_DC_UP      | 7  | 180  | 16073 | 167  | 3.784797 | 0.002607 |
| greenyello | 227   | PLASMA_MEMBRANE                              | 20 | 1095 | 15158 | 150  | 1.979056 | 0.002608 |
| lightcyan  | 7945  | KIM_GLIS2_TARGETS_UP                         | 3  | 72   | 16181 | 62   | 10.92272 | 0.002614 |
| blue       | 7236  | WANG_TUMOR_INVASIVENESS_UP                   | 88 | 363  | 15890 | 2978 | 1.323076 | 0.002615 |
| cyan       | 2622  | GNF2_CD53                                    | 3  | 58   | 16195 | 77   | 10.91782 | 0.002616 |
| cyan       | 8111  | PHONG_TNF_TARGETS_UP                         | 3  | 58   | 16195 | 77   | 10.91782 | 0.002616 |
| lightcyan  | 8254  | SNF5_DN.V1_UP                                | 4  | 151  | 16102 | 62   | 6.944243 | 0.002629 |
| brown      | 7918  | ACOSTA_PROLIFERATION_INDEPENDENT_MYC_TARGET  | 26 | 110  | 16143 | 2190 | 1.754164 | 0.002636 |
| grey60     | 593   | INFLAMMATORY_RESPONSE                        | 3  | 102  | 16151 | 44   | 10.8643  | 0.002637 |
| red        | 3567  | MODULE_79                                    | 9  | 91   | 16162 | 524  | 3.067633 | 0.002641 |
| turquoise  | 777   | VESICLE_MEDIATED_TRANSPORT                   | 64 | 182  | 16071 | 4169 | 1.370914 | 0.002643 |
| purple     | 9445  | GSE24634_TREG_VS_TCONV_POST_DAY7_IL4_CONVERT | 7  | 192  | 16061 | 157  | 3.77425  | 0.002646 |
| brown      | 3931  | PID_RHOA_PATHWAY                             | 13 | 42   | 16211 | 2190 | 2.297119 | 0.002647 |
| turquoise  | 8862  | GSE17721_CTRL_VS_POLYIC_24H_BMDM_UP          | 67 | 192  | 16061 | 4169 | 1.360427 | 0.002648 |
| turquoise  | 9025  | GSE17721_PAM3CSK4_VS_GADIQUIMOD_2H_BMDM      | 67 | 192  | 16061 | 4169 | 1.360427 | 0.002648 |
| brown      | 4008  | PID_CXCR4_PATHWAY                            | 24 | 99   | 16154 | 2190 | 1.799142 | 0.00265  |
| brown      | 6143  | WIELAND_UP_BY_HBV_INFECTION                  | 24 | 99   | 16154 | 2190 | 1.799142 | 0.00265  |
| brown      | 2934  | BIOCARTA_CBL_PATHWAY                         | 6  | 12   | 16241 | 2190 | 3.710731 | 0.002652 |
| brown      | 4619  | REACTOME_SIGNAL_REGULATORY_PROTEIN_SIRP_FAM  | 6  | 12   | 16241 | 2190 | 3.710731 | 0.002652 |
| brown      | 5548  | XU_HGF_TARGETS_INDUCED_BY_AKT1_48HR_UP       | 6  | 12   | 16241 | 2190 | 3.710731 | 0.002652 |
| red        | 2803  | KEGG_MAPK_SIGNALING_PATHWAY                  | 16 | 225  | 16028 | 524  | 2.205666 | 0.002652 |
| brown      | 1953  | CACTGCC,MIR-34A,MIR-34C,MIR-449              | 51 | 257  | 15996 | 2190 | 1.472741 | 0.002658 |
| purple     | 9915  | GSE36476_YOUNG_VS_OLD_DONOR_MEMORY_CD4_T     | 6  | 143  | 16110 | 157  | 4.343593 | 0.002661 |
| brown      | 383   | HEMOPOIESIS                                  | 18 | 67   | 16186 | 2190 | 1.993825 | 0.002664 |
| turquoise  | 2520  | GCM_FANCL                                    | 13 | 24   | 16229 | 4169 | 2.111707 | 0.002668 |
| turquoise  | 3125  | chr7p21                                      | 13 | 24   | 16229 | 4169 | 2.111707 | 0.002668 |
| turquoise  | 3570  | MODULE_82                                    | 13 | 24   | 16229 | 4169 | 2.111707 | 0.002668 |
| salmon     | 1469  | V\$ELK1_02                                   | 7  | 238  | 16015 | 127  | 3.764011 | 0.00267  |
| salmon     | 8695  | GSE1460_DP_VS_CD4_THYMOCYTE_DN               | 6  | 177  | 16076 | 127  | 4.338182 | 0.002673 |
| salmon     | 10005 | GSE3982_MAST_CELL_VS_CENT_MEMORY_CD4_TCELL   | 6  | 177  | 16076 | 127  | 4.338182 | 0.002673 |
| salmon     | 10165 | GSE7460_TREG_VS_TCONV_ACT_WITH_TGFB_DN       | 6  | 177  | 16076 | 127  | 4.338182 | 0.002673 |
| turquoise  | 171   | INTEGRAL_TO_ORGANELLE_MEMBRANE               | 22 | 49   | 16204 | 4169 | 1.750363 | 0.002676 |
| brown      | 9009  | GSE17721_POLYIC_VS_CPG_4H_BMDM_DN            | 38 | 179  | 16074 | 2190 | 1.575506 | 0.002678 |
| pink       | 10241 | GSE9037_CTRL_VS_LPS_1H_STIM_BMDM_DN          | 8  | 169  | 16084 | 228  | 3.374442 | 0.002682 |

|             |       |                                              |     |      |       |      |          |          |
|-------------|-------|----------------------------------------------|-----|------|-------|------|----------|----------|
| pink        | 10249 | GSE9037_WT_VS_IRAK4_KO_BMDM_DN               | 8   | 169  | 16084 | 228  | 3.374442 | 0.002682 |
| purple      | 2884  | KEGG_GLIOMA                                  | 4   | 60   | 16193 | 157  | 6.901486 | 0.002685 |
| purple      | 5128  | GRAHAM_NORMAL QUIESCENT_VS_NORMAL_DIVIDIN    | 4   | 60   | 16193 | 157  | 6.901486 | 0.002685 |
| cyan        | 6703  | BAELDE_DIABETIC_NEPHROPATHY_DN               | 7   | 396  | 15857 | 77   | 3.731175 | 0.002687 |
| purple      | 7242  | TSAI_RESPONSE_TO_RADIATION_THERAPY           | 3   | 29   | 16224 | 157  | 10.7092  | 0.002687 |
| magenta     | 8569  | GSE13484_12H_UNSTIM_VS_YF17D_VACCINE_STIM_PI | 7   | 181  | 16072 | 167  | 3.763887 | 0.002689 |
| red         | 9284  | GSE20715_WT_VS_TLR4_KO_24H_OZONE_LUNG_UP     | 13  | 165  | 16088 | 524  | 2.443777 | 0.002696 |
| turquoise   | 7111  | BOCHKIS_FOXA2_TARGETS                        | 121 | 377  | 15876 | 4169 | 1.251255 | 0.002698 |
| lightyellow | 2879  | KEGG_PATHWAYS_IN_CANCER                      | 4   | 290  | 15963 | 33   | 6.793312 | 0.002702 |
| cyan        | 8078  | PLASARI_TGFB1_TARGETS_10HR_DN                | 5   | 202  | 16051 | 77   | 5.224701 | 0.002703 |
| brown       | 9765  | GSE3337_4H_VS_16H_IFNG_IN_CD8POS_DC_DN       | 39  | 185  | 16068 | 2190 | 1.564524 | 0.002705 |
| lightgreen  | 3688  | MODULE_208                                   | 3   | 108  | 16145 | 42   | 10.74934 | 0.002713 |
| yellow      | 9378  | GSE22886_NAIVE_CD4_TCELL_VS_DC_UP            | 29  | 192  | 16061 | 1426 | 1.721515 | 0.002714 |
| blue        | 2494  | GCM_SIRT2                                    | 16  | 43   | 16210 | 2978 | 2.030768 | 0.002715 |
| purple      | 6497  | KAYO_AGING_MUSCLE_UP                         | 7   | 193  | 16060 | 157  | 3.754695 | 0.002724 |
| brown       | 8566  | GSE13484_3H_UNSTIM_VS_YF17D_VACCINE_STIM_PB  | 40  | 191  | 16062 | 2190 | 1.554233 | 0.002726 |
| brown       | 9726  | GSE30962_ACUTE_VS_CHRONIC_LCMV_PRIMARY_INF_  | 40  | 191  | 16062 | 2190 | 1.554233 | 0.002726 |
| brown       | 9963  | GSE3982_MEMORY_CD4_TCELL_VS_BCELL_DN         | 40  | 191  | 16062 | 2190 | 1.554233 | 0.002726 |
| blue        | 7653  | CAIRO_HEPATOBLASTOMA_UP                      | 52  | 196  | 16057 | 2978 | 1.447958 | 0.002728 |
| brown       | 3726  | MODULE_257                                   | 33  | 150  | 16103 | 2190 | 1.632721 | 0.00273  |
| tan         | 5632  | OXFORD_RALA_TARGETS_UP                       | 2   | 9    | 16244 | 145  | 24.90881 | 0.002731 |
| red         | 9061  | GSE17721_POLYIC_VS_GARDIQUIMOD_2H_BMDM_DN    | 14  | 185  | 16068 | 524  | 2.347246 | 0.002732 |
| red         | 9424  | GSE24142_DN2_VS_DN3_THYMOCYTE_FETAL_UP       | 14  | 185  | 16068 | 524  | 2.347246 | 0.002732 |
| red         | 9505  | GSE2706_UNSTIM_VS_8H_LPS_DC_DN               | 14  | 185  | 16068 | 524  | 2.347246 | 0.002732 |
| red         | 10010 | GSE3982_MAST_CELL_VS_TH2_UP                  | 14  | 185  | 16068 | 524  | 2.347246 | 0.002732 |
| brown       | 4096  | PID_HIF1_TFPATHWAY                           | 17  | 62   | 16191 | 2190 | 2.034917 | 0.002737 |
| red         | 2870  | KEGG_ALZHEIMERS_DISEASE                      | 12  | 146  | 16107 | 524  | 2.549357 | 0.002737 |
| brown       | 9919  | GSE36476_YOUNG_VS_OLD_DONOR_MEMORY_CD4_T     | 41  | 197  | 16056 | 2190 | 1.544568 | 0.002741 |
| brown       | 10191 | GSE7764_IL15_NK_CELL_24H_VS_SPLENOCYTE_DN    | 41  | 197  | 16056 | 2190 | 1.544568 | 0.002741 |
| turquoise   | 3372  | chr14q22                                     | 23  | 52   | 16201 | 4169 | 1.724353 | 0.002744 |
| turquoise   | 6503  | HU_GENOTOXIN_ACTION_DIRECT_VS_INDIRECT_24HR  | 23  | 52   | 16201 | 4169 | 1.724353 | 0.002744 |
| yellow      | 10144 | GSE6269_STREP_AUREUS_VS_STREP_PNEUMO_INF_PE  | 25  | 158  | 16095 | 1426 | 1.80342  | 0.002749 |
| salmon      | 2326  | MORF_RAD23B                                  | 6   | 178  | 16075 | 127  | 4.31381  | 0.002749 |
| salmon      | 7744  | YAO_TEMPORAL_RESPONSE_TO_PROGESTERONE_CLU'   | 6   | 178  | 16075 | 127  | 4.31381  | 0.002749 |
| brown       | 1806  | V\$PU1_Q6                                    | 42  | 203  | 16050 | 2190 | 1.535475 | 0.002751 |
| black       | 8407  | GSE10239_NAIVE_VS_MEMORY_CD8_TCELL_DN        | 9   | 168  | 16085 | 283  | 3.076666 | 0.002756 |
| blue        | 1870  | V\$NFY_Q6_01                                 | 59  | 228  | 16025 | 2978 | 1.412297 | 0.00276  |
| pink        | 6537  | BLALOCK_ALZHEIMERS_DISEASE_UP                | 35  | 1535 | 14718 | 228  | 1.625393 | 0.00277  |
| turquoise   | 8857  | GSE17721_CTRL_VS_POLYIC_6H_BMDM_DN           | 63  | 179  | 16074 | 4169 | 1.372111 | 0.002773 |
| brown       | 485   | NEGATIVE_REGULATION_OF_CELLULAR_PROCESS      | 99  | 562  | 15691 | 2190 | 1.307339 | 0.002774 |
| grey60      | 3441  | chr11p13                                     | 2   | 29   | 16224 | 44   | 25.47492 | 0.002776 |
| pink        | 1540  | V\$GATA1_02                                  | 8   | 170  | 16083 | 228  | 3.354592 | 0.002781 |
| brown       | 2666  | GNF2_MCL1                                    | 16  | 57   | 16196 | 2190 | 2.083217 | 0.002782 |
| lightgreen  | 4873  | SENGUPTA_NASOPHARYNGEAL_CARCINOMA_WITH_LN    | 3   | 109  | 16144 | 42   | 10.65072 | 0.002785 |
| grey60      | 6302  | LENAOUR_DENDRITIC_CELL_MATURATION_UP         | 3   | 104  | 16149 | 44   | 10.65538 | 0.002786 |
| brown       | 3019  | BIOCARTA_PPARA_PATHWAY                       | 15  | 52   | 16201 | 2190 | 2.140806 | 0.00279  |
| turquoise   | 4346  | REACTOME_REGULATION_OF_APOPTOSIS             | 24  | 55   | 16198 | 4169 | 1.70118  | 0.002791 |
| brown       | 4104  | PID_S1P_S1P2_PATHWAY                         | 9   | 24   | 16229 | 2190 | 2.783048 | 0.002793 |
| brown       | 6670  | DEBIASI_APOPTOSIS_BY_REOVIRUS_INFECTION_DN   | 54  | 276  | 15977 | 2190 | 1.452025 | 0.002793 |
| yellow      | 6000  | NIKOLSKY_BREAST_CANCER_11Q12_Q14_AMPLICON    | 21  | 125  | 16128 | 1426 | 1.914799 | 0.002797 |
| purple      | 7144  | BOQUEST_STEM_CELL_DN                         | 7   | 194  | 16059 | 157  | 3.73534  | 0.002804 |
| pink        | 235   | REGULATION_OF_BIOLOGICAL_QUALITY             | 12  | 335  | 15918 | 228  | 2.553496 | 0.002807 |
| turquoise   | 6693  | DAZARD_RESPONSE_TO_UV_SCC_UP                 | 44  | 117  | 16136 | 4169 | 1.466116 | 0.002816 |
| salmon      | 5776  | GROSS_HYPOXIA_VIA_HIF1A_UP                   | 4   | 75   | 16178 | 127  | 6.825407 | 0.002817 |
| turquoise   | 147   | DNA_DIRECTED_RNA_POLYMERASEII_HOLOENZYME     | 28  | 67   | 16186 | 4169 | 1.629239 | 0.002818 |
| pink        | 8071  | HUANG_GATA2_TARGETS_DN                       | 5   | 69   | 16184 | 228  | 5.165586 | 0.002819 |
| turquoise   | 2635  | GNF2_DEK                                     | 25  | 58   | 16195 | 4169 | 1.680404 | 0.00282  |
| magenta     | 364   | REGULATION_OF_SYNAPSE_STRUCTURE_AND_ACTIVIT' | 2   | 8    | 16245 | 167  | 24.33084 | 0.002822 |
| magenta     | 5609  | FUNG_IL2_SIGNALING_2                         | 2   | 8    | 16245 | 167  | 24.33084 | 0.002822 |
| lightcyan   | 5251  | GAUSSMANN_MLL_AF4_FUSION_TARGETS_F_UP        | 4   | 154  | 16099 | 62   | 6.808965 | 0.002823 |

|             |       |                                               |     |      |       |      |          |          |
|-------------|-------|-----------------------------------------------|-----|------|-------|------|----------|----------|
| turquoise   | 2149  | GCATTTG,MIR-105                               | 56  | 156  | 16097 | 4169 | 1.399475 | 0.002829 |
| pink        | 11    | BRUSH_BORDER                                  | 2   | 6    | 16247 | 228  | 23.7617  | 0.002832 |
| pink        | 7645  | BOYLAN_MULTIPLE_MYELOMA_PCA1_DN               | 2   | 6    | 16247 | 228  | 23.7617  | 0.002832 |
| brown       | 1379  | GTPASE_ACTIVITY                               | 23  | 94   | 16159 | 2190 | 1.815889 | 0.002834 |
| turquoise   | 3322  | chr5q22                                       | 11  | 19   | 16234 | 4169 | 2.257048 | 0.002841 |
| red         | 8835  | GSE17721_CTRL_VS_LPS_1H_BMDM_DN               | 13  | 166  | 16087 | 524  | 2.429056 | 0.002841 |
| red         | 9978  | GSE3982_EOSINOPHIL_VS_BCELL_UP                | 13  | 166  | 16087 | 524  | 2.429056 | 0.002841 |
| purple      | 4366  | REACTOME_PEPTIDE_LIGAND_BINDING_RECEPTORS     | 5   | 100  | 16153 | 157  | 5.176115 | 0.002843 |
| greenyello  | 118   | INTEGRAL_TO_MEMBRANE                          | 19  | 1025 | 15228 | 150  | 2.008501 | 0.002844 |
| red         | 3653  | MODULE_170                                    | 9   | 92   | 16161 | 524  | 3.034289 | 0.002846 |
| lightgreen  | 5167  | KOKKINAKIS_METHIONINE_DEPRIVATION_96HR_UP     | 3   | 110  | 16143 | 42   | 10.5539  | 0.002858 |
| magenta     | 10033 | GSE3982_MAC_VS_BCELL_DN                       | 7   | 183  | 16070 | 167  | 3.722751 | 0.002859 |
| greenyello  | 426   | VIRAL_REPRODUCTIVE_PROCESS                    | 3   | 31   | 16222 | 150  | 10.48581 | 0.002866 |
| greenyello  | 3224  | chr11q14                                      | 3   | 31   | 16222 | 150  | 10.48581 | 0.002866 |
| black       | 8658  | GSE1432_CTRL_VS_IFNG_1H_MICROGLIA_UP          | 9   | 169  | 16084 | 283  | 3.058461 | 0.002867 |
| red         | 9762  | GSE3337_CTRL_VS_16H_IFNG_IN_CD8POS_DC_UP      | 14  | 186  | 16067 | 524  | 2.334626 | 0.00287  |
| blue        | 7001  | DAIRKEE_CANCER_PRONE_RESPONSE_BPA             | 17  | 47   | 16206 | 2978 | 1.974058 | 0.002873 |
| cyan        | 8207  | HINATA_NFKB_IMMUNO_INF                        | 2   | 17   | 16236 | 77   | 24.8327  | 0.002877 |
| blue        | 4146  | REACTOME_SIGNALING_BY_NGF                     | 53  | 201  | 16052 | 2978 | 1.439092 | 0.002877 |
| turquoise   | 6086  | GOLDRATH_HOMEOSTATIC_PROLIFERATION            | 59  | 166  | 16087 | 4169 | 1.385625 | 0.002881 |
| lightyellow | 2809  | KEGG_NEUROACTIVE_LIGAND_RECEPTOR_INTERACTIO   | 3   | 141  | 16112 | 33   | 10.47905 | 0.002882 |
| pink        | 5093  | SABATES_COLORECTAL_ADENOMA_DN                 | 8   | 171  | 16082 | 228  | 3.334975 | 0.002884 |
| lightgreen  | 5666  | SIMBULAN_UV_RESPONSE_NORMAL_DN                | 2   | 31   | 16222 | 42   | 24.96621 | 0.002891 |
| lightgreen  | 6660  | BURTON_ADIPOGENESIS_1                         | 2   | 31   | 16222 | 42   | 24.96621 | 0.002891 |
| turquoise   | 4806  | NAKAMURA_TUMOR_ZONE_PERIPHERAL_VS_CENTRAL     | 176 | 572  | 15681 | 4169 | 1.19955  | 0.002893 |
| blue        | 9860  | GSE360_L_DONOVANI_VS_L_MAJOR_MAC_UP           | 47  | 174  | 16079 | 2978 | 1.474204 | 0.002901 |
| turquoise   | 3162  | chr2q32                                       | 17  | 35   | 16218 | 4169 | 1.893575 | 0.002906 |
| turquoise   | 3471  | ST_GA13_PATHWAY                               | 17  | 35   | 16218 | 4169 | 1.893575 | 0.002906 |
| turquoise   | 6539  | BURTON_ADIPOGENESIS_12                        | 17  | 35   | 16218 | 4169 | 1.893575 | 0.002906 |
| blue        | 10033 | GSE3982_MAC_VS_BCELL_DN                       | 49  | 183  | 16070 | 2978 | 1.461349 | 0.002907 |
| blue        | 910   | MRNA_METABOLIC_PROCESS                        | 26  | 83   | 16170 | 2978 | 1.709638 | 0.002907 |
| blue        | 5163  | COLDREN_GEFITINIB_RESISTANCE_UP               | 26  | 83   | 16170 | 2978 | 1.709638 | 0.002907 |
| greenyello  | 2986  | BIOCARTA_TCAPOPTOSIS_PATHWAY                  | 2   | 9    | 16244 | 150  | 24.07852 | 0.002919 |
| greenyello  | 3923  | MODULE_575                                    | 2   | 9    | 16244 | 150  | 24.07852 | 0.002919 |
| purple      | 3537  | MODULE_48                                     | 8   | 249  | 16004 | 157  | 3.326017 | 0.002924 |
| salmon      | 6442  | BLALOCK_ALZHEIMERS_DISEASE_DN                 | 18  | 1128 | 15125 | 127  | 2.042176 | 0.002928 |
| yellow      | 9788  | GSE34205_HEALTHY_VS_FLU_INF_INFANT_PBMC_UP    | 29  | 193  | 16060 | 1426 | 1.712595 | 0.002933 |
| brown       | 8792  | GSE15930_NAIVE_VS_72H_IN_VITRO_STIM_IFNAB_CD  | 37  | 174  | 16079 | 2190 | 1.578127 | 0.002933 |
| yellow      | 9922  | GSE37416_CTRL_VS_OH_F_TULARENSIS_LVS_NEUTROP  | 23  | 142  | 16111 | 1426 | 1.846093 | 0.002939 |
| turquoise   | 3728  | MODULE_261                                    | 37  | 95   | 16158 | 4169 | 1.518377 | 0.00295  |
| lightcyan   | 4822  | HOLLMANN_APOPTOSIS_VIA_CD40_DN                | 5   | 257  | 15996 | 62   | 5.1001   | 0.002953 |
| greenyello  | 6476  | KAAB_HEART_ATRIUM_VS_VENTRICLE_UP             | 7   | 205  | 16048 | 150  | 3.69987  | 0.002954 |
| lightcyan   | 8543  | GSE13306_RA_VS_UNTREATED_TCONV_DN             | 4   | 156  | 16097 | 62   | 6.721671 | 0.002957 |
| midnightb   | 5847  | RICKMAN_TUMOR_DIFFERENTIATED_WELL_VS_POORL    | 5   | 224  | 16029 | 71   | 5.109721 | 0.00296  |
| turquoise   | 7821  | WHITFIELD_CELL_CYCLE_S                        | 55  | 153  | 16100 | 4169 | 1.401435 | 0.002962 |
| magenta     | 881   | NEURON_DIFFERENTIATION                        | 4   | 58   | 16195 | 167  | 6.711955 | 0.002963 |
| magenta     | 983   | REGULATION_OF_IMMUNE_SYSTEM_PROCESS           | 4   | 58   | 16195 | 167  | 6.711955 | 0.002963 |
| brown       | 8547  | GSE13411_NAIVE_VS_IGM_MEMORY_BCELL_DN         | 38  | 180  | 16073 | 2190 | 1.566753 | 0.002964 |
| brown       | 8967  | GSE17721_CPG_VS_GARDIQUIMOD_0.5H_BMDM_DN      | 38  | 180  | 16073 | 2190 | 1.566753 | 0.002964 |
| brown       | 9172  | GSE17974_CTRL_VS_ACT_IL4_AND_ANTI_IL12_2H_CD4 | 38  | 180  | 16073 | 2190 | 1.566753 | 0.002964 |
| purple      | 625   | PHOSPHOINOSITIDE_MEDIATED_SIGNALING           | 3   | 30   | 16223 | 157  | 10.35223 | 0.002965 |
| purple      | 3730  | MODULE_263                                    | 3   | 30   | 16223 | 157  | 10.35223 | 0.002965 |
| purple      | 8592  | GSE13485_DAY7_VS_DAY21_YF17D_VACCINE_PBMC_U   | 7   | 196  | 16057 | 157  | 3.697225 | 0.002968 |
| lightyellow | 2582  | GNF2_CCNA1                                    | 2   | 40   | 16213 | 33   | 24.62576 | 0.002971 |
| salmon      | 2493  | GCM_RAD21                                     | 3   | 37   | 16216 | 127  | 10.37646 | 0.002982 |
| salmon      | 8613  | GSE14000_TRANSLATED_RNA_VS_MRNA_16H_LPS_DC    | 6   | 181  | 16072 | 127  | 4.242311 | 0.002986 |
| brown       | 7220  | ALONSO_METASTASIS_UP                          | 39  | 186  | 16067 | 2190 | 1.556113 | 0.002988 |
| brown       | 8429  | GSE10325_LUPUS_CD4_TCELL_VS_LUPUS_BCELL_DN    | 39  | 186  | 16067 | 2190 | 1.556113 | 0.002988 |
| brown       | 3069  | BIOCARTA_HER2_PATHWAY                         | 8   | 20   | 16233 | 2190 | 2.968584 | 0.002991 |
| salmon      | 2437  | MORF_PPP2CA                                   | 5   | 125  | 16128 | 127  | 5.119055 | 0.002991 |

|             |       |                                              |     |      |       |      |          |          |
|-------------|-------|----------------------------------------------|-----|------|-------|------|----------|----------|
| brown       | 7596  | NGO_MALIGNANT_GLIOMA_1P_LOH                  | 7   | 16   | 16237 | 2190 | 3.246889 | 0.002999 |
| brown       | 9737  | GSE31082_DP_VS_CD4_SP_THYMOCYTE_DN           | 40  | 192  | 16061 | 2190 | 1.546138 | 0.003006 |
| lightgreen  | 6801  | DURCHDEWALD_SKIN_CARCINOGENESIS_DN           | 4   | 233  | 16020 | 42   | 6.643368 | 0.003006 |
| brown       | 2340  | MORF_TERF2IP                                 | 26  | 111  | 16142 | 2190 | 1.73836  | 0.00301  |
| brown       | 5283  | WANG_ESOPHAGUS_CANCER_VS_NORMAL_UP           | 26  | 111  | 16142 | 2190 | 1.73836  | 0.00301  |
| red         | 9859  | GSE360_LOW_DOSE_B_MALAYI_VS_M_TUBERCULOSIS   | 14  | 187  | 16066 | 524  | 2.322141 | 0.003014 |
| brown       | 9669  | GSE29618_BCELL_VS_PDC_DAY7_FLU_VACCINE_DN    | 41  | 198  | 16055 | 2190 | 1.536767 | 0.003017 |
| brown       | 10234 | GSE9006_TYPE_1_DIABETES_AT_DX_VS_4MONTH_POS  | 41  | 198  | 16055 | 2190 | 1.536767 | 0.003017 |
| pink        | 7476  | ROME_INSULIN_TARGETS_IN_MUSCLE_UP            | 14  | 429  | 15824 | 228  | 2.32632  | 0.00302  |
| purple      | 2185  | RYAAAKNNNNNTTGW_UNKNOW                       | 4   | 62   | 16191 | 157  | 6.678858 | 0.003026 |
| purple      | 5891  | GOTZMANN_EPITHELIAL_TO_MESENCHYMAL_TRANSIT   | 4   | 62   | 16191 | 157  | 6.678858 | 0.003026 |
| purple      | 6274  | GUO_HEX_TARGETS_DN                           | 4   | 62   | 16191 | 157  | 6.678858 | 0.003026 |
| red         | 7204  | QI_PLASMACYTOMA_UP                           | 17  | 249  | 16004 | 524  | 2.117638 | 0.003026 |
| magenta     | 8209  | CYCLIN_D1_KE_V1_DN                           | 6   | 138  | 16115 | 167  | 4.23145  | 0.003029 |
| blue        | 6458  | KAYO_CALORIE_RESTRICTION_MUSCLE_DN           | 24  | 75   | 16178 | 2978 | 1.746461 | 0.003035 |
| magenta     | 8508  | GSE12845_IGD_POS_BLOOD_VS_PRE_GC_TONSIL_BCEI | 7   | 185  | 16068 | 167  | 3.682505 | 0.003037 |
| magenta     | 9292  | GSE20715_0H_VS_48H_OZONE_LUNG_UP             | 7   | 185  | 16068 | 167  | 3.682505 | 0.003037 |
| magenta     | 9765  | GSE3337_4H_VS_16H_IFNG_IN_CD8POS_DC_DN       | 7   | 185  | 16068 | 167  | 3.682505 | 0.003037 |
| turquoise   | 2138  | ACTGTAG,MIR-139                              | 42  | 111  | 16142 | 4169 | 1.475122 | 0.00304  |
| brown       | 4050  | PID_PDGRBPATHWAY                             | 29  | 128  | 16125 | 2190 | 1.681425 | 0.003044 |
| brown       | 4324  | REACTOME_RESPONSE_TO_ELEVATED_PLATELET_CYTC  | 19  | 73   | 16180 | 2190 | 1.931613 | 0.003045 |
| red         | 3675  | MODULE_195                                   | 11  | 129  | 16124 | 524  | 2.644875 | 0.00305  |
| brown       | 2233  | TGANTCA_V\$AP1_C                             | 149 | 895  | 15358 | 2190 | 1.235528 | 0.003051 |
| blue        | 10037 | GSE3982_MAC_VS_EFF_MEMORY_CD4_TCELL_DN       | 44  | 161  | 16092 | 2978 | 1.491543 | 0.003052 |
| turquoise   | 8949  | GSE17721_PAM3CSK4_VS_CPG_0.5H_BMDM_DN        | 61  | 173  | 16080 | 4169 | 1.374629 | 0.003053 |
| turquoise   | 9650  | GSE29617_CTRL_VS_DAY7_TIV_FLU_VACCINE_PBMC_2 | 61  | 173  | 16080 | 4169 | 1.374629 | 0.003053 |
| turquoise   | 8816  | GSE16522_MEMORY_VS_NAIVE_ANTI_CD3CD28_STIM   | 67  | 193  | 16060 | 4169 | 1.353378 | 0.003056 |
| blue        | 8386  | KAECH_NAIVE_VS_DAY8_EFF_CD8_TCELL_UP         | 52  | 197  | 16056 | 2978 | 1.440608 | 0.003059 |
| blue        | 9446  | GSE24634_TREG_VS_TCONV_POST_DAY10_IL4_CONVE  | 52  | 197  | 16056 | 2978 | 1.440608 | 0.003059 |
| blue        | 2655  | GNF2_ITGAL                                   | 19  | 55   | 16198 | 2978 | 1.885384 | 0.003062 |
| turquoise   | 9624  | GSE2826_WT_VS_XID_BCELL_UP                   | 64  | 183  | 16070 | 4169 | 1.363423 | 0.003064 |
| cyan        | 1639  | V\$ISRE_01                                   | 5   | 208  | 16045 | 77   | 5.073989 | 0.003065 |
| greenyello  | 59    | MEMBRANE                                     | 26  | 1601 | 14652 | 150  | 1.759642 | 0.003067 |
| blue        | 1234  | PROTEIN_N_TERMINUS_BINDING                   | 14  | 36   | 16217 | 2978 | 2.122435 | 0.003068 |
| blue        | 2793  | KEGG_DNA_REPLICATION                         | 14  | 36   | 16217 | 2978 | 2.122435 | 0.003068 |
| salmon      | 10035 | GSE3982_MAC_VS_BASOPHIL_DN                   | 6   | 182  | 16071 | 127  | 4.219001 | 0.003069 |
| blue        | 7857  | VERHAAK_GLIOMASTOMA_MESENCHYMAL              | 46  | 170  | 16083 | 2978 | 1.476787 | 0.003078 |
| blue        | 2331  | MORF_RFC5                                    | 23  | 71   | 16182 | 2978 | 1.767984 | 0.00308  |
| blue        | 3266  | chr16p12                                     | 23  | 71   | 16182 | 2978 | 1.767984 | 0.00308  |
| salmon      | 2794  | KEGG_SPLICEOSOME                             | 5   | 126  | 16127 | 127  | 5.078428 | 0.003095 |
| yellow      | 7251  | MOOTHA_PGC                                   | 52  | 403  | 15850 | 1426 | 1.47066  | 0.003099 |
| salmon      | 4553  | REACTOME_REGULATION_OF_MITOTIC_CELL_CYCLE    | 4   | 77   | 16176 | 127  | 6.648124 | 0.003099 |
| green       | 5575  | WANG_METHYLATED_IN_BREAST_CANCER             | 8   | 32   | 16221 | 1305 | 3.113602 | 0.003109 |
| yellow      | 187   | MITOCHONDRIAL_ENVELOPE                       | 17  | 94   | 16159 | 1426 | 2.061271 | 0.003113 |
| greenyello  | 1785  | V\$EFC_Q6                                    | 7   | 207  | 16046 | 150  | 3.664122 | 0.003117 |
| greenyello  | 1871  | V\$SREBP_Q3                                  | 7   | 207  | 16046 | 150  | 3.664122 | 0.003117 |
| blue        | 3693  | MODULE_213                                   | 21  | 63   | 16190 | 2978 | 1.81923  | 0.003119 |
| lightyellow | 9840  | GSE360_L_MAJOR_VS_T_GONDII_DC_UP             | 3   | 145  | 16108 | 33   | 10.18997 | 0.003119 |
| yellow      | 955   | TRANSLATION                                  | 26  | 168  | 16085 | 1426 | 1.763917 | 0.003127 |
| magenta     | 3500  | MODULE_7                                     | 7   | 186  | 16067 | 167  | 3.662707 | 0.003129 |
| turquoise   | 7251  | MOOTHA_PGC                                   | 128 | 403  | 15850 | 4169 | 1.238245 | 0.003131 |
| blue        | 2794  | KEGG_SPLICEOSOME                             | 36  | 126  | 16127 | 2978 | 1.55934  | 0.003149 |
| lightcyan   | 3238  | chr4q22                                      | 2   | 22   | 16231 | 62   | 23.83138 | 0.003149 |
| turquoise   | 5171  | CHOW_RASSF1_TARGETS_UP                       | 14  | 27   | 16226 | 4169 | 2.021464 | 0.00315  |
| blue        | 1345  | DNA_DEPENDENT_ATPASE_ACTIVITY                | 10  | 22   | 16231 | 2978 | 2.480768 | 0.003152 |
| salmon      | 9088  | GSE17721_LPS_VS_GARDIQUIMOD_16H_BMDM_UP      | 6   | 183  | 16070 | 127  | 4.195947 | 0.003153 |
| salmon      | 10033 | GSE3982_MAC_VS_BCELL_DN                      | 6   | 183  | 16070 | 127  | 4.195947 | 0.003153 |
| cyan        | 7309  | LINDSTEDT_DENDRITIC_CELL_MATURATION_A        | 3   | 62   | 16191 | 77   | 10.21345 | 0.003164 |
| lightcyan   | 3126  | chr10q23                                     | 3   | 77   | 16176 | 62   | 10.21345 | 0.003164 |
| lightcyan   | 7276  | TOOKER_GEMCITABINE_RESISTANCE_UP             | 3   | 77   | 16176 | 62   | 10.21345 | 0.003164 |

|             |                                                      |     |     |       |      |          |          |
|-------------|------------------------------------------------------|-----|-----|-------|------|----------|----------|
| greenyello  | 1685 V\$RSRFC4_Q2                                    | 6   | 155 | 16098 | 150  | 4.194323 | 0.003165 |
| brown       | 2854 KEGG_NEUROTROPHIN_SIGNALING_PATHWAY             | 27  | 117 | 16136 | 2190 | 1.712645 | 0.003167 |
| yellow      | 8842 GSE17721_CTRL_VS_LPS_8H_BMDM_UP                 | 29  | 194 | 16059 | 1426 | 1.703767 | 0.003167 |
| yellow      | 8960 GSE17721_PAM3CSK4_VS_CPG_12H_BMDM_UP            | 29  | 194 | 16059 | 1426 | 1.703767 | 0.003167 |
| yellow      | 9335 GSE22886_NAIVE_BCELL_VS_BLOOD_PLASMA_CELL_DI    | 29  | 194 | 16059 | 1426 | 1.703767 | 0.003167 |
| greenyello  | 6337 MOREAUX_MULTIPLE_MYELOMA_BY_TACI_UP             | 9   | 324 | 15929 | 150  | 3.009815 | 0.003169 |
| lightgreen  | 5862 SCHAEFFER_PROSTATE_DEVELOPMENT_48HR_UP          | 5   | 390 | 15863 | 42   | 4.961233 | 0.003179 |
| red         | 8184 ZWANG_CLASS_1_TRANSIENTLY_INDUCED_BY_EGF        | 25  | 428 | 15825 | 524  | 1.811751 | 0.003192 |
| purple      | 5557 AGARWAL_AKT_PATHWAY_TARGETS                     | 2   | 9   | 16244 | 157  | 23.00495 | 0.003193 |
| purple      | 8208 HINATA_NFKB_MATRIX                              | 2   | 9   | 16244 | 157  | 23.00495 | 0.003193 |
| magenta     | 55 BASEMENT_MEMBRANE                                 | 3   | 29  | 16224 | 167  | 10.06793 | 0.003199 |
| magenta     | 3584 MODULE_96                                       | 3   | 29  | 16224 | 167  | 10.06793 | 0.003199 |
| magenta     | 7577 MIKKELSEN_IPS_ICP_WITH_H3K27ME3                 | 3   | 29  | 16224 | 167  | 10.06793 | 0.003199 |
| brown       | 1011 SMALL_GTPASE_MEDIATED_SIGNAL_TRANSDUCTION       | 21  | 84  | 16169 | 2190 | 1.855365 | 0.003213 |
| turquoise   | 91 NUCLEAR_ENVELOPE_ENDOPLASMIC_RETICULUM_NET        | 34  | 86  | 16167 | 4169 | 1.541282 | 0.003215 |
| turquoise   | 8848 GSE17721_CTRL_VS_POLYIC_0.5H_BMDM_UP            | 63  | 180 | 16073 | 4169 | 1.364488 | 0.003217 |
| greenyello  | 14 INTRINSIC_TO_PLASMA_MEMBRANE                      | 15  | 733 | 15520 | 150  | 2.217326 | 0.003218 |
| greenyello  | 2482 MORF_WNT1                                       | 4   | 66  | 16187 | 150  | 6.566869 | 0.003224 |
| red         | 5015 TAKEDA_TARGETS_OF_NUP98_HOXA9_FUSION_10D_D      | 11  | 130 | 16123 | 524  | 2.62453  | 0.003238 |
| salmon      | 8587 GSE13485_DAY1_VS_DAY21_YF17D_VACCINE_PBMC_L     | 6   | 184 | 16069 | 127  | 4.173143 | 0.003239 |
| salmon      | 10115 GSE39820_TGFBETA1_IL6_VS_TGFBETA1_IL6_IL23A_TF | 6   | 184 | 16069 | 127  | 4.173143 | 0.003239 |
| lightyellow | 5114 JAATINEN_HEMATOPOIETIC_STEM_CELL_UP             | 4   | 305 | 15948 | 33   | 6.459215 | 0.00324  |
| yellow      | 8678 GSE1448_CTRL_VS_ANTI_VALPHA2_DP_THYMOCYTE_L     | 27  | 177 | 16076 | 1426 | 1.738619 | 0.00324  |
| yellow      | 10165 GSE7460_TREG_VS_TCONV_ACT_WITH_TGFB_DN         | 27  | 177 | 16076 | 1426 | 1.738619 | 0.00324  |
| lightyellow | 9197 GSE17974_IL4_AND_ANTI_IL12_VS_UNTREATED_12H_    | 3   | 147 | 16106 | 33   | 10.05133 | 0.003242 |
| lightgreen  | 1804 V\$PEA3_Q6                                      | 4   | 238 | 16015 | 42   | 6.503802 | 0.003244 |
| magenta     | 3278 chr14q32                                        | 5   | 97  | 16156 | 167  | 5.016668 | 0.00325  |
| blue        | 3272 chr17p13                                        | 51  | 193 | 16060 | 2978 | 1.442187 | 0.003252 |
| blue        | 9664 GSE29618_PDC_VS_MDC_UP                          | 51  | 193 | 16060 | 2978 | 1.442187 | 0.003252 |
| turquoise   | 6930 STEARMAN_LUNG_CANCER_EARLY_VS_LATE_UP           | 45  | 121 | 16132 | 4169 | 1.449869 | 0.003258 |
| cyan        | 6525 WANG_CISPLATIN_RESPONSE_AND_XPC_DN              | 5   | 211 | 16042 | 77   | 5.001846 | 0.003259 |
| purple      | 3960 PID_INTEGRIN3_PATHWAY                           | 3   | 31  | 16222 | 157  | 10.01829 | 0.003259 |
| purple      | 3984 PID_ARF6_PATHWAY                                | 3   | 31  | 16222 | 157  | 10.01829 | 0.003259 |
| purple      | 4761 REACTOME_PACKAGING_OF_TELOMERE_ENDS             | 3   | 31  | 16222 | 157  | 10.01829 | 0.003259 |
| purple      | 7754 NAKAMURA_ADIPOGENESIS_EARLY_DN                  | 3   | 31  | 16222 | 157  | 10.01829 | 0.003259 |
| purple      | 8271 JNK_DN.V1_DN                                    | 6   | 149 | 16104 | 157  | 4.168683 | 0.003262 |
| blue        | 9985 GSE3982_EOSINOPHIL_VS_CENT_MEMORY_CD4_TCELL     | 49  | 184 | 16069 | 2978 | 1.453407 | 0.003271 |
| lightyellow | 7572 MIKKELSEN_MEF_LCP_WITH_H3K27ME3                 | 2   | 42  | 16211 | 33   | 23.4531  | 0.003272 |
| brown       | 8681 GSE1448_CTRL_VS_ANTI_VBETA5_DP_THYMOCYTE_DN     | 38  | 181 | 16072 | 2190 | 1.558097 | 0.003276 |
| blue        | 8540 GSE13306_RA_VS_UNTREATED_TREG_UP                | 47  | 175 | 16078 | 2978 | 1.46578  | 0.003276 |
| lightcyan   | 8008 WINZEN_DEGRADED_VIA_KHSRP                       | 3   | 78  | 16175 | 62   | 10.08251 | 0.003281 |
| greenyello  | 1647 V\$RFX1_01                                      | 7   | 209 | 16044 | 150  | 3.629059 | 0.003287 |
| brown       | 9859 GSE360_LOW_DOSE_B_MALAYI_VS_M_TUBERCULOSIS      | 39  | 187 | 16066 | 2190 | 1.547791 | 0.003296 |
| brown       | 9886 GSE360_HIGH_DOSE_B_MALAYI_VS_M_TUBERCULOSIS     | 39  | 187 | 16066 | 2190 | 1.547791 | 0.003296 |
| turquoise   | 1961 ACATTCC,MIR-1,MIR-206                           | 91  | 275 | 15978 | 4169 | 1.290061 | 0.003298 |
| turquoise   | 7114 MATZUK_OVULATION                                | 8   | 12  | 16241 | 4169 | 2.599025 | 0.003306 |
| brown       | 8501 GSE12366_PLASMA_CELL_VS_MEMORY_BCELL_DN         | 40  | 193 | 16060 | 2190 | 1.538127 | 0.00331  |
| brown       | 9101 GSE17721_12H_VS_24H_LPS_BMDM_DN                 | 40  | 193 | 16060 | 2190 | 1.538127 | 0.00331  |
| brown       | 9290 GSE20715_0H_VS_24H_OZONE_LUNG_UP                | 40  | 193 | 16060 | 2190 | 1.538127 | 0.00331  |
| lightcyan   | 9652 GSE29617_DAY3_VS_DAY7_TIV_FLU_VACCINE_PBMC_     | 4   | 161 | 16092 | 62   | 6.512923 | 0.003312 |
| lightcyan   | 10251 GSE9037_WT_VS_IRAK4_KO_LPS_1H_STIM_BMDM_DN     | 4   | 161 | 16092 | 62   | 6.512923 | 0.003312 |
| red         | 8903 GSE17721_CTRL_VS_GARDIQUIMOD_4H_BMDM_DN         | 13  | 169 | 16084 | 524  | 2.385937 | 0.003317 |
| brown       | 9600 GSE27786_NKCELL_VS_ERYTHROBLAST_UP              | 41  | 199 | 16054 | 2190 | 1.529045 | 0.003317 |
| pink        | 9627 GSE2826_WT_VS_BTK_KO_BCELL_DN                   | 8   | 175 | 16078 | 228  | 3.258747 | 0.003322 |
| brown       | 404 ESTABLISHMENT_OF_CELLULAR_LOCALIZATION           | 62  | 328 | 15925 | 2190 | 1.402837 | 0.003325 |
| brown       | 7558 YAGI_AML_WITH_11Q23_REARRANGED                  | 62  | 328 | 15925 | 2190 | 1.402837 | 0.003325 |
| yellow      | 4135 REACTOME_BASE_EXCISION_REPAIR                   | 6   | 18  | 16235 | 1426 | 3.799205 | 0.003325 |
| salmon      | 8925 GSE17721_LPS_VS_POLYIC_12H_BMDM_DN              | 6   | 185 | 16068 | 127  | 4.150585 | 0.003326 |
| brown       | 963 NEGATIVE_REGULATION_OF_BIOLOGICAL_PROCESS        | 102 | 585 | 15668 | 2190 | 1.293998 | 0.003338 |
| lightgreen  | 7266 BOYLAN_MULTIPLE_MYELOMA_C_D_DN                  | 4   | 240 | 16013 | 42   | 6.449603 | 0.003342 |

|            |       |                                                  |     |      |       |      |          |          |
|------------|-------|--------------------------------------------------|-----|------|-------|------|----------|----------|
| blue       | 4126  | REACTOME_PYRUVATE_METABOLISM_AND_CITRIC_AC       | 15  | 40   | 16213 | 2978 | 2.046634 | 0.003343 |
| red        | 2714  | GNF2_TYK2                                        | 5   | 32   | 16221 | 524  | 4.846434 | 0.003348 |
| red        | 6462  | CHEN_LVAD_SUPPORT_OF_FAILING_HEART_DN            | 5   | 32   | 16221 | 524  | 4.846434 | 0.003348 |
| turquoise  | 8672  | GSE14350_TREG_VS_TEFF_IN_IL2RB_KO_UP             | 68  | 197  | 16056 | 4169 | 1.345688 | 0.003349 |
| turquoise  | 10267 | GSE9650_GP33_VS_GP276_LCMV_SPECIFIC_EXHAUSTE     | 68  | 197  | 16056 | 4169 | 1.345688 | 0.003349 |
| salmon     | 1609  | V\$USF_C                                         | 7   | 248  | 16005 | 127  | 3.612236 | 0.003354 |
| brown      | 4178  | REACTOME_TRANS_GOLGI_NETWORK_VESICLE_BUDDI       | 16  | 58   | 16195 | 2190 | 2.0473   | 0.00337  |
| red        | 3508  | MODULE_16                                        | 26  | 453  | 15800 | 524  | 1.780235 | 0.003371 |
| turquoise  | 8563  | GSE13484_UNSTIM_VS_3H_YF17D_VACCINE_STIM_PB      | 65  | 187  | 16066 | 4169 | 1.355106 | 0.003372 |
| brown      | 3468  | ST_ADRENERGIC                                    | 10  | 29   | 16224 | 2190 | 2.559125 | 0.003374 |
| brown      | 3976  | PID_NECTIN_PATHWAY                               | 10  | 29   | 16224 | 2190 | 2.559125 | 0.003374 |
| brown      | 4102  | PID_NCADHERINPATHWAY                             | 10  | 29   | 16224 | 2190 | 2.559125 | 0.003374 |
| brown      | 4205  | REACTOME_GLYCOSPHINGOLIPID_METABOLISM            | 10  | 29   | 16224 | 2190 | 2.559125 | 0.003374 |
| grey60     | 2742  | KEGG_TRYPTOPHAN_METABOLISM                       | 2   | 32   | 16221 | 44   | 23.08665 | 0.003374 |
| grey60     | 3746  | MODULE_287                                       | 2   | 32   | 16221 | 44   | 23.08665 | 0.003374 |
| blue       | 928   | REGULATION_OF_RNA_METABOLIC_PROCESS              | 98  | 414  | 15839 | 2978 | 1.291917 | 0.003375 |
| red        | 3873  | MODULE_471                                       | 3   | 10   | 16243 | 524  | 9.305153 | 0.003375 |
| blue       | 1453  | TRANSCRIPTION_COFACTOR_ACTIVITY                  | 54  | 207  | 16046 | 2978 | 1.423745 | 0.003381 |
| lightcyan  | 9256  | GSE20151_CTRL_VS_FUSOBACT_NUCLEATUM_NEUTRC       | 4   | 162  | 16091 | 62   | 6.47272  | 0.003386 |
| turquoise  | 4347  | REACTOME_RNA_POL_II_TRANSCRIPTION                | 39  | 102  | 16151 | 4169 | 1.490617 | 0.003391 |
| turquoise  | 2633  | GNF2_DAP3                                        | 44  | 118  | 16135 | 4169 | 1.453692 | 0.003394 |
| salmon     | 2679  | GNF2_PA2G4                                       | 4   | 79   | 16174 | 127  | 6.479817 | 0.0034   |
| brown      | 7322  | PARK_APL_PATHOGENESIS_DN                         | 14  | 48   | 16205 | 2190 | 2.164593 | 0.003409 |
| magenta    | 8347  | STK33_SKM_DN                                     | 8   | 240  | 16013 | 167  | 3.244112 | 0.00341  |
| salmon     | 9004  | GSE17721_POLYIC_VS_CPG_1H_BMDM_UP                | 6   | 186  | 16067 | 127  | 4.12827  | 0.003416 |
| salmon     | 9772  | GSE339_CD8POS_VS_CD4CD8DN_DC_UP                  | 6   | 186  | 16067 | 127  | 4.12827  | 0.003416 |
| yellow     | 8454  | GSE11057_CD4_CENT_MEM_VS_PBMC_UP                 | 29  | 195  | 16058 | 1426 | 1.69503  | 0.003417 |
| yellow     | 8819  | GSE16522_ANTI_CD3CD28_STIM_VS_UNSTIM_MEMOF       | 29  | 195  | 16058 | 1426 | 1.69503  | 0.003417 |
| yellow     | 9096  | GSE17721_0.5H_VS_8H_LPS_BMDM_UP                  | 29  | 195  | 16058 | 1426 | 1.69503  | 0.003417 |
| yellow     | 9574  | GSE27786_BCELL_VS_MONO_MAC_UP                    | 29  | 195  | 16058 | 1426 | 1.69503  | 0.003417 |
| brown      | 6541  | KAYO_AGING_MUSCLE_DN                             | 26  | 112  | 16141 | 2190 | 1.722839 | 0.003429 |
| turquoise  | 7250  | MOOTHA_HUMAN_MITODB_6_2002                       | 130 | 411  | 15842 | 4169 | 1.233114 | 0.003435 |
| lightcyan  | 7760  | BAUS_TFF2_TARGETS_UP                             | 2   | 23   | 16230 | 62   | 22.79523 | 0.00344  |
| pink       | 5639  | OXFORD_RALA_OR_RALB_TARGETS_DN                   | 3   | 22   | 16231 | 228  | 9.720694 | 0.003445 |
| turquoise  | 2557  | GCM_SUFU                                         | 31  | 77   | 16176 | 4169 | 1.569541 | 0.003454 |
| turquoise  | 4553  | REACTOME_REGULATION_OF_MITOTIC_CELL_CYCLE        | 31  | 77   | 16176 | 4169 | 1.569541 | 0.003454 |
| salmon     | 80    | NUCLEUS                                          | 20  | 1333 | 14920 | 127  | 1.920126 | 0.003465 |
| salmon     | 7916  | WIERENGA_PML_INTERACTOME                         | 3   | 39   | 16214 | 127  | 9.844337 | 0.003468 |
| lightgreen | 1074  | G_PROTEIN_COUPLED_RECEPTOR_BINDING               | 2   | 34   | 16219 | 42   | 22.76331 | 0.00347  |
| brown      | 579   | INTERLEUKIN_1_SECRETION                          | 5   | 9    | 16244 | 2190 | 4.123034 | 0.003475 |
| blue       | 9852  | GSE360_T_GONDII_VS_M_TUBERCULOSIS_DC_UP          | 46  | 171  | 16082 | 2978 | 1.46815  | 0.003478 |
| greenyello | 8381  | LEF1_UP.V1_UP                                    | 6   | 158  | 16095 | 150  | 4.114684 | 0.003479 |
| greenyello | 8188  | ZWANG_TRANSIENTLY_UP_BY_2ND_EGF_PULSE_ONLY       | 19  | 1044 | 15209 | 150  | 1.971948 | 0.003479 |
| red        | 9520  | GSE2706_LPS_VS_R848_AND_LPS_8H_STIM_DC_UP        | 14  | 190  | 16063 | 524  | 2.285476 | 0.003479 |
| brown      | 3533  | MODULE_44                                        | 55  | 285  | 15968 | 2190 | 1.432212 | 0.003488 |
| yellow     | 913   | NEGATIVE_REGULATION_OF_TRANSFERASE_ACTIVITY      | 8   | 30   | 16223 | 1426 | 3.039364 | 0.003489 |
| red        | 8899  | GSE17721_CTRL_VS_GARDIQUIMOD_1H_BMDM_DN          | 13  | 170  | 16083 | 524  | 2.371902 | 0.003489 |
| red        | 7963  | PASINI_SUZ12_TARGETS_DN                          | 18  | 274  | 15979 | 524  | 2.037625 | 0.003496 |
| purple     | 951   | G_PROTEIN_COUPLED_RECEPTOR_PROTEIN_SIGNALING     | 7   | 202  | 16051 | 157  | 3.587406 | 0.003506 |
| yellow     | 7744  | YAO_TEMPORAL_RESPONSE_TO_PROGESTERONE_CLUSTERING | 27  | 178  | 16075 | 1426 | 1.728852 | 0.003509 |
| black      | 5291  | JOHANSSON_GLIOMAGENESIS_BY_PDGF_DN               | 3   | 18   | 16235 | 283  | 9.571849 | 0.003511 |
| turquoise  | 8555  | GSE13411_IGM_VS_SWITCHED_MEMORY_BCELL_DN         | 67  | 194  | 16059 | 4169 | 1.346402 | 0.003519 |
| turquoise  | 8917  | GSE17721_LPS_VS_POLYIC_2H_BMDM_DN                | 67  | 194  | 16059 | 4169 | 1.346402 | 0.003519 |
| turquoise  | 9079  | GSE17721_LPS_VS_GARDIQUIMOD_2H_BMDM_DN           | 67  | 194  | 16059 | 4169 | 1.346402 | 0.003519 |
| turquoise  | 9140  | GSE17721_0.5H_VS_4H_GARDIQUIMOD_BMDM_UP          | 67  | 194  | 16059 | 4169 | 1.346402 | 0.003519 |
| turquoise  | 9743  | GSE32423_MEMORY_VS_NAIVE_CD8_TCELL_DN            | 67  | 194  | 16059 | 4169 | 1.346402 | 0.003519 |
| yellow     | 4122  | REACTOME_TRANSLATION                             | 23  | 144  | 16109 | 1426 | 1.820453 | 0.003521 |
| turquoise  | 1692  | CCGMNNTNACG_UNKNOWN                              | 30  | 74   | 16179 | 4169 | 1.580488 | 0.003522 |
| magenta    | 3835  | MODULE_410                                       | 3   | 30   | 16223 | 167  | 9.732335 | 0.003528 |
| salmon     | 4550  | REACTOME_MITOTIC_G1_G1_S_PHASES                  | 5   | 130  | 16123 | 127  | 4.922168 | 0.003539 |



|             |                                                       |     |     |       |      |          |          |
|-------------|-------------------------------------------------------|-----|-----|-------|------|----------|----------|
| lightcyan   | 3534 MODULE_45                                        | 7   | 520 | 15733 | 62   | 3.528877 | 0.00354  |
| midnightb   | 7294 SEKI_INFLAMMATORY_RESPONSE_LPS_UP                | 3   | 70  | 16183 | 71   | 9.810664 | 0.003547 |
| blue        | 8061 WAKABAYASHI_ADIPOGENESIS_PPARG_RXRA_BOUND        | 39  | 140 | 16113 | 2978 | 1.520356 | 0.003552 |
| magenta     | 5022 BILBAN_B_CLL_LPL_UP                              | 4   | 61  | 16192 | 167  | 6.381859 | 0.003559 |
| turquoise   | 2058 GTAAGAT,MIR-200A                                 | 21  | 47  | 16206 | 4169 | 1.741899 | 0.00356  |
| purple      | 6116 TARTE_PLASMA_CELL_VS_PLASMABLAST_UP              | 9   | 315 | 15938 | 157  | 2.95778  | 0.003564 |
| turquoise   | 7157 WEST_ADRENOCORTICAL_TUMOR_UP                     | 94  | 286 | 15967 | 4169 | 1.281337 | 0.003568 |
| lightgreen  | 6196 BYSTRYKH_HEMATOPOIESIS_STEM_CELL_QTL_TRANS       | 7   | 781 | 15472 | 42   | 3.468417 | 0.003569 |
| purple      | 7756 NAKAMURA_ADIPOGENESIS_LATE_DN                    | 3   | 32  | 16221 | 157  | 9.705215 | 0.003571 |
| green       | 1045 NITROGEN_COMPOUND_CATABOLIC_PROCESS              | 7   | 26  | 16227 | 1305 | 3.353109 | 0.003575 |
| pink        | 6088 GNATENKO_PLATELET_SIGNATURE                      | 4   | 45  | 16208 | 228  | 6.336452 | 0.003582 |
| lightyellow | 5618 TSUNODA_CISPLATIN_RESISTANCE_DN                  | 2   | 44  | 16209 | 33   | 22.38705 | 0.003586 |
| lightyellow | 6026 CHEN_NEUROBLASTOMA_COPY_NUMBER_GAINS             | 2   | 44  | 16209 | 33   | 22.38705 | 0.003586 |
| red         | 2844 KEGG_HEMATOPOIETIC_CELL_LINEAGE                  | 8   | 78  | 16175 | 524  | 3.181249 | 0.003587 |
| red         | 5949 LIN_SILENCED_BY_TUMOR_MICROENVIRONMENT           | 8   | 78  | 16175 | 524  | 3.181249 | 0.003587 |
| brown       | 8845 GSE17721_CTRL_VS_LPS_12H_BMDM_DN                 | 37  | 176 | 16077 | 2190 | 1.560194 | 0.003591 |
| purple      | 2900 KEGG_HYPERTROPHIC_CARDIOMYOPATHY_HCM             | 4   | 65  | 16188 | 157  | 6.370603 | 0.003591 |
| purple      | 7311 LINDSTEDT_DENDRITIC_CELL_MATURATION_C            | 4   | 65  | 16188 | 157  | 6.370603 | 0.003591 |
| blue        | 4441 REACTOME_CITRIC_ACID_CYCLE_TCA_CYCLE             | 9   | 19  | 16234 | 2978 | 2.585221 | 0.003595 |
| blue        | 5982 COLLIS_PRKDC_SUBSTRATES                          | 9   | 19  | 16234 | 2978 | 2.585221 | 0.003595 |
| turquoise   | 3705 MODULE_233                                       | 12  | 22  | 16231 | 4169 | 2.126475 | 0.003598 |
| turquoise   | 5585 SCHRAMM_INHBA_TARGETS_DN                         | 12  | 22  | 16231 | 4169 | 2.126475 | 0.003598 |
| turquoise   | 7828 WANG_METASTASIS_OF_BREAST_CANCER_ESR1_UP         | 12  | 22  | 16231 | 4169 | 2.126475 | 0.003598 |
| salmon      | 2320 MORF_PSMC1                                       | 6   | 188 | 16065 | 127  | 4.084352 | 0.0036   |
| salmon      | 8947 GSE17721_POLYIC_VS_PAM3CSK4_24H_BMDM_DN          | 6   | 188 | 16065 | 127  | 4.084352 | 0.0036   |
| salmon      | 9819 GSE360_DC_VS_MAC_L_DONOVANI_DN                   | 6   | 188 | 16065 | 127  | 4.084352 | 0.0036   |
| magenta     | 449 RESPONSE_TO_STEROID_HORMONE_STIMULUS              | 2   | 9   | 16244 | 167  | 21.62741 | 0.003603 |
| magenta     | 3044 BIOCARTA_PLATELETAPP_PATHWAY                     | 2   | 9   | 16244 | 167  | 21.62741 | 0.003603 |
| magenta     | 3118 BIOCARTA_VITCB_PATHWAY                           | 2   | 9   | 16244 | 167  | 21.62741 | 0.003603 |
| magenta     | 4029 PID_INTEGRIN4_PATHWAY                            | 2   | 9   | 16244 | 167  | 21.62741 | 0.003603 |
| red         | 9832 GSE360_L_DONOVANI_VS_T_GONDII_DC_UP              | 12  | 151 | 16102 | 524  | 2.464941 | 0.003607 |
| magenta     | 8128 BOSCO_ALLERGEN_INDUCED_TH2_ASSOCIATED_MODU       | 6   | 143 | 16110 | 167  | 4.083497 | 0.00361  |
| lightcyan   | 8335 TGFB_UP.V1_DN                                    | 4   | 165 | 16088 | 62   | 6.355034 | 0.003616 |
| lightcyan   | 10112 GSE39820_IL1B_IL6_VS_IL1B_IL6_IL23A_TREATED_CD4 | 4   | 165 | 16088 | 62   | 6.355034 | 0.003616 |
| cyan        | 7443 MEISSNER_BRAIN_HCP_WITH_H3K4ME3_AND_H3K27M       | 10  | 779 | 15474 | 77   | 2.709601 | 0.003618 |
| magenta     | 8826 GSE17580_TREG_VS_TEFF_S_MANSONI_INF_UP           | 7   | 191 | 16062 | 167  | 3.566824 | 0.003622 |
| magenta     | 8830 GSE17580_UNINFECTED_VS_S_MANSONI_INF_TREG_U      | 7   | 191 | 16062 | 167  | 3.566824 | 0.003622 |
| magenta     | 10258 GSE9650_NAIVE_VS_MEMORY_CD8_TCELL_UP            | 7   | 191 | 16062 | 167  | 3.566824 | 0.003622 |
| greenyello  | 7652 PYEON_CANCER_HEAD_AND_NECK_VS_CERVICAL_DN        | 2   | 10  | 16243 | 150  | 21.67067 | 0.003627 |
| brown       | 9070 GSE17721_POLYIC_VS_GARDIQUIMOD_16H_BMDM_U        | 39  | 188 | 16065 | 2190 | 1.539558 | 0.003631 |
| brown       | 9894 GSE36392_TYPE_2_MYELOID_VS_NEUTROPHIL_IL25_TI    | 39  | 188 | 16065 | 2190 | 1.539558 | 0.003631 |
| turquoise   | 7850 KIM_ALL_DISORDERS_CALB1_CORR_UP                  | 155 | 500 | 15753 | 4169 | 1.208546 | 0.003634 |
| blue        | 712 MACROMOLECULE_CATABOLIC_PROCESS                   | 36  | 127 | 16126 | 2978 | 1.547062 | 0.003635 |
| turquoise   | 3783 MODULE_331                                       | 28  | 68  | 16185 | 4169 | 1.60528  | 0.003636 |
| brown       | 10270 GSE9988_ANTI_TREM1_VS_LOW_LPS_MONOCYTE_UP       | 40  | 194 | 16059 | 2190 | 1.530198 | 0.00364  |
| red         | 3800 MODULE_356                                       | 11  | 132 | 16121 | 524  | 2.584765 | 0.003641 |
| red         | 6431 LU_AGING_BRAIN_DN                                | 11  | 132 | 16121 | 524  | 2.584765 | 0.003641 |
| blue        | 9113 GSE17721_12H_VS_24H_POLYIC_BMDM_DN               | 51  | 194 | 16059 | 2978 | 1.434753 | 0.003642 |
| blue        | 9966 GSE3982_DC_VS_NEUTROPHIL_LPS_STIM_UP             | 51  | 194 | 16059 | 2978 | 1.434753 | 0.003642 |
| red         | 8342 HOXA9_DN.V1_UP                                   | 14  | 191 | 16062 | 524  | 2.27351  | 0.003647 |
| red         | 10172 GSE7460_FOXP3_MUT_VS_WT_ACT_TCONV_UP            | 14  | 191 | 16062 | 524  | 2.27351  | 0.003647 |
| red         | 10207 GSE7852_LN_VS_FAT_TCONV_DN                      | 14  | 191 | 16062 | 524  | 2.27351  | 0.003647 |
| yellow      | 6478 NIELSEN_GIST_VS_SYNOVIAL_SARCOMA_UP              | 5   | 13  | 16240 | 1426 | 4.383698 | 0.003647 |
| yellow      | 8086 SANDERSON_PPARG_TARGETS                          | 5   | 13  | 16240 | 1426 | 4.383698 | 0.003647 |
| greenyello  | 1478 V\$SOX5_01                                       | 7   | 213 | 16040 | 150  | 3.560908 | 0.003649 |
| greenyello  | 1652 V\$NFY_01                                        | 7   | 213 | 16040 | 150  | 3.560908 | 0.003649 |
| greenyello  | 1877 V\$SMAD_Q6                                       | 7   | 213 | 16040 | 150  | 3.560908 | 0.003649 |
| salmon      | 2272 RCGCANGCGY_V\$NRF1_Q6                            | 15  | 881 | 15372 | 127  | 2.178939 | 0.00365  |
| cyan        | 7569 MIKKELSEN_MCV6_LCP_WITH_H3K4ME3                  | 4   | 133 | 16120 | 77   | 6.348208 | 0.003657 |
| red         | 9912 GSE36476_CTRL_VS_TSST_ACT_72H_MEMORY_CD4_T       | 13  | 171 | 16082 | 524  | 2.358031 | 0.003669 |

|             |       |                                              |     |     |       |      |          |          |
|-------------|-------|----------------------------------------------|-----|-----|-------|------|----------|----------|
| lightgreen  | 2898  | KEGG_GRAFT_VERSUS_HOST_DISEASE               | 2   | 35  | 16218 | 42   | 22.11293 | 0.003675 |
| lightgreen  | 6260  | STOSSI_RESPONSE_TO ESTRADIOL                 | 2   | 35  | 16218 | 42   | 22.11293 | 0.003675 |
| blue        | 8645  | GSE14308_TH1_VS_NATURAL_TREG_DN              | 49  | 185 | 16068 | 2978 | 1.44555  | 0.003675 |
| grey60      | 4565  | REACTOME_GPCR_LIGAND_BINDING                 | 4   | 235 | 16018 | 44   | 6.287427 | 0.003676 |
| magenta     | 6932  | HELLER_SILENCED_BY METHYLATION_UP            | 8   | 243 | 16010 | 167  | 3.204061 | 0.003676 |
| red         | 2263  | TGACAGNY_V\$MEIS1_01                         | 35  | 672 | 15581 | 524  | 1.615478 | 0.003678 |
| pink        | 1562  | V\$SRY_01                                    | 8   | 178 | 16075 | 228  | 3.203824 | 0.003683 |
| yellow      | 8452  | GSE11057_CD4_EFF_MEM_VS_PBMG_UP              | 29  | 196 | 16057 | 1426 | 1.686382 | 0.003683 |
| yellow      | 9939  | GSE37416_0H_VS_12H_F_TULARENSIS_LVS_NEUTROPH | 29  | 196 | 16057 | 1426 | 1.686382 | 0.003683 |
| lightyellow | 6957  | MARTINEZ_RB1_AND_TP53_TARGETS_UP             | 5   | 519 | 15734 | 33   | 4.744847 | 0.003689 |
| blue        | 6814  | MONNIER_POSTRADIATION_TUMOR_ESCAPE_UP        | 89  | 372 | 15881 | 2978 | 1.305738 | 0.003692 |
| blue        | 8643  | GSE14308_TH1_VS_INDUCED_TREG_DN              | 47  | 176 | 16077 | 2978 | 1.457451 | 0.003692 |
| red         | 3713  | MODULE_241                                   | 7   | 62  | 16191 | 524  | 3.501939 | 0.003692 |
| red         | 7309  | LINDSTEDT_DENDRITIC_CELL_MATURATION_A        | 7   | 62  | 16191 | 524  | 3.501939 | 0.003692 |
| salmon      | 9434  | GSE24634_NAIVE_CD4_TCELL_VS_DAY5_IL4_CONV_TR | 6   | 189 | 16064 | 127  | 4.062742 | 0.003694 |
| lightcyan   | 9848  | GSE360_T_GONDII_VS_B_MALAYI_HIGH_DOSE_DC_UP  | 4   | 166 | 16087 | 62   | 6.316751 | 0.003695 |
| turquoise   | 8725  | GSE14769_UNSTIM_VS_240MIN_LPS_BMDM_DN        | 66  | 191 | 16062 | 4169 | 1.347138 | 0.003697 |
| turquoise   | 9065  | GSE17721_POLYIC_VS_GARDIQUIMOD_6H_BMDM_DN    | 66  | 191 | 16062 | 4169 | 1.347138 | 0.003697 |
| greenyello  | 8261  | RAF_UP.V1_DN                                 | 6   | 160 | 16093 | 150  | 4.06325  | 0.0037   |
| turquoise   | 3360  | chr2q31                                      | 24  | 56  | 16197 | 4169 | 1.670801 | 0.003713 |
| salmon      | 6697  | ABE_INNER_EAR                                | 3   | 40  | 16213 | 127  | 9.598228 | 0.003728 |
| greenyello  | 6990  | OSADA_ASCL1_TARGETS_UP                       | 3   | 34  | 16219 | 150  | 9.560588 | 0.003739 |
| lightcyan   | 4949  | NEWMAN_ERCC6_TARGETS_UP                      | 2   | 24  | 16229 | 62   | 21.84543 | 0.003744 |
| lightcyan   | 7627  | WORSCHER_TUMOR_EVASION_AND_TOLEROGENICIT     | 2   | 24  | 16229 | 62   | 21.84543 | 0.003744 |
| midnightb   | 7590  | ONO_FOXP3_TARGETS_UP                         | 2   | 21  | 16232 | 71   | 21.80148 | 0.003745 |
| turquoise   | 959   | PHOSPHORYLATION                              | 93  | 283 | 15970 | 4169 | 1.281145 | 0.003752 |
| green       | 893   | NEUROTRANSMITTER_SECRETION                   | 4   | 9   | 16244 | 1305 | 5.535292 | 0.003753 |
| green       | 7695  | DORN_ADENOVIRUS_INFECTION_24HR_UP            | 4   | 9   | 16244 | 1305 | 5.535292 | 0.003753 |
| tan         | 8753  | GSE15659_CD45RA_NEG_CD4_TCELL_VS_RESTING_TRE | 6   | 166 | 16087 | 145  | 4.051433 | 0.003753 |
| lightyellow | 5886  | WU_CELL_MIGRATION                            | 3   | 155 | 16098 | 33   | 9.532551 | 0.003763 |
| red         | 4844  | SENGUPTA_NASOPHARYNGEAL_CARCINOMA_UP         | 18  | 276 | 15977 | 524  | 2.022859 | 0.003773 |
| lightcyan   | 8659  | GSE1432_CTRL_VS_IFNG_1H_MICROGLIA_DN         | 4   | 167 | 16086 | 62   | 6.278926 | 0.003775 |
| lightcyan   | 9134  | GSE17721_4_VS_24H_CPG_BMDM_UP                | 4   | 167 | 16086 | 62   | 6.278926 | 0.003775 |
| magenta     | 4225  | REACTOME_EXTRACELLULAR_MATRIX_ORGANIZATION   | 4   | 62  | 16191 | 167  | 6.278926 | 0.003775 |
| brown       | 6929  | STEARMAN_TUMOR_FIELD_EFFECT_UP               | 11  | 34  | 16219 | 2190 | 2.401061 | 0.003778 |
| lightyellow | 6955  | MARTINEZ_TP53_TARGETS_UP                     | 5   | 522 | 15731 | 33   | 4.717578 | 0.003781 |
| black       | 6470  | SESTO_RESPONSE_TO_UV_C6                      | 4   | 37  | 16216 | 283  | 6.208767 | 0.003782 |
| turquoise   | 844   | POSITIVE_REGULATION_OF_JNK_ACTIVITY          | 10  | 17  | 16236 | 4169 | 2.293257 | 0.003786 |
| salmon      | 8620  | GSE14000_UNSTIM_VS_16H_LPS_DC_UP             | 6   | 190 | 16063 | 127  | 4.041359 | 0.003791 |
| salmon      | 9663  | GSE29618_MONOCYTE_VS_MDC_DN                  | 6   | 190 | 16063 | 127  | 4.041359 | 0.003791 |
| yellow      | 9871  | GSE360_L_MAJOR_VS_T_GONDII_MAC_DN            | 27  | 179 | 16074 | 1426 | 1.719193 | 0.003796 |
| yellow      | 2369  | MORF_CSNK2B                                  | 39  | 286 | 15967 | 1426 | 1.55422  | 0.003801 |
| red         | 7870  | LU_EZH2_TARGETS_DN                           | 22  | 365 | 15888 | 524  | 1.869528 | 0.003802 |
| purple      | 5239  | GRAESSMANN_RESPONSE_TO_MC_AND_DOXORUBICIN    | 13  | 574 | 15679 | 157  | 2.344582 | 0.003808 |
| pink        | 8818  | GSE16522_ANTI_CD3CD28_STIM_VS_UNSTIM_MEMOF   | 8   | 179 | 16074 | 228  | 3.185926 | 0.00381  |
| pink        | 9611  | GSE27786_NKTCELL_VS_MONO_MAC_DN              | 8   | 179 | 16074 | 228  | 3.185926 | 0.00381  |
| turquoise   | 7864  | WANG_RESPONSE_TO_GSK3_INHIBITOR_SB216763_UF  | 116 | 363 | 15890 | 4169 | 1.245813 | 0.003813 |
| greenyello  | 2807  | KEGG_CHEMOKINE_SIGNALING_PATHWAY             | 6   | 161 | 16092 | 150  | 4.038012 | 0.003815 |
| greenyello  | 9199  | GSE17974_IL4_AND_ANTI_IL12_VS_UNTREATED_24H_ | 6   | 161 | 16092 | 150  | 4.038012 | 0.003815 |
| turquoise   | 2069  | ATGAAGG,MIR-205                              | 53  | 148 | 16105 | 4169 | 1.396098 | 0.003817 |
| pink        | 294   | GLYCOPROTEIN_METABOLIC_PROCESS               | 5   | 74  | 16179 | 228  | 4.81656  | 0.003819 |
| pink        | 5381  | RIZ_ERYTHROID_DIFFERENTIATION                | 5   | 74  | 16179 | 228  | 4.81656  | 0.003819 |
| red         | 6869  | ZHENG_FOXP3_TARGETS_IN_THYMUS_UP             | 14  | 192 | 16061 | 524  | 2.261669 | 0.003821 |
| red         | 8391  | KAECH_NAIVE_VS_MEMORY_CD8_TCELL_DN           | 14  | 192 | 16061 | 524  | 2.261669 | 0.003821 |
| red         | 8663  | GSE1432_CTRL_VS_IFNG_24H_MICROGLIA_DN        | 14  | 192 | 16061 | 524  | 2.261669 | 0.003821 |
| lightgreen  | 3654  | MODULE_171                                   | 3   | 122 | 16131 | 42   | 9.515808 | 0.003827 |
| pink        | 5068  | SENESE_HDAC1_TARGETS_DN                      | 9   | 219 | 16034 | 228  | 2.929524 | 0.003832 |
| magenta     | 1497  | V\$TAL1BETAITF2_01                           | 7   | 193 | 16060 | 167  | 3.529863 | 0.003834 |
| magenta     | 1671  | V\$OCT1_B                                    | 7   | 193 | 16060 | 167  | 3.529863 | 0.003834 |
| magenta     | 10187 | GSE7764_NKCELL_VS_SPLENOCYTE_DN              | 7   | 193 | 16060 | 167  | 3.529863 | 0.003834 |

|            |       |                                              |     |     |       |      |          |          |
|------------|-------|----------------------------------------------|-----|-----|-------|------|----------|----------|
| red        | 3999  | PID_IL1PATHWAY                               | 5   | 33  | 16220 | 524  | 4.699572 | 0.003843 |
| turquoise  | 9321  | GSE22886_NAIVE_CD4_TCELL_VS_NKCELL_DN        | 68  | 198 | 16055 | 4169 | 1.338891 | 0.003844 |
| brown      | 388   | INDUCTION_OF_APOPTOSIS_BY_EXTRACELLULAR_SIGN | 9   | 25  | 16228 | 2190 | 2.671726 | 0.003849 |
| blue       | 4353  | REACTOME_CELL_DEATH_SIGNALING_VIA_NRAGE_NF   | 19  | 56  | 16197 | 2978 | 1.851716 | 0.003852 |
| blue       | 3996  | PID_TELOMERASEPATHWAY                        | 21  | 64  | 16189 | 2978 | 1.790804 | 0.003855 |
| cyan       | 8124  | RAO_BOUND_BY_SALL4_ISOFORM_B                 | 7   | 423 | 15830 | 77   | 3.493015 | 0.003866 |
| lightgreen | 5132  | WAMUNYOKOLI_OVARIAN_CANCER_LMP_UP            | 4   | 250 | 16003 | 42   | 6.191619 | 0.003867 |
| blue       | 2600  | GNF2_RFC4                                    | 20  | 60  | 16193 | 2978 | 1.81923  | 0.003869 |
| yellow     | 5132  | WAMUNYOKOLI_OVARIAN_CANCER_LMP_UP            | 35  | 250 | 16003 | 1426 | 1.595666 | 0.003871 |
| blue       | 9246  | GSE18791_UNSTIM_VS_NEWCATSLE_VIRUS_DC_18H_U  | 50  | 190 | 16063 | 2978 | 1.436234 | 0.003874 |
| turquoise  | 1549  | ACTWSNACTNY_UNKNOWN                          | 35  | 90  | 16163 | 4169 | 1.516098 | 0.003877 |
| magenta    | 6103  | FRASOR_RESPONSE_TO ESTRADIOL_UP              | 3   | 31  | 16222 | 167  | 9.418389 | 0.003877 |
| turquoise  | 8628  | GSE14308_TH2_VS_TH1_UP                       | 65  | 188 | 16065 | 4169 | 1.347898 | 0.003885 |
| turquoise  | 9077  | GSE17721_LPS_VS_GARDIQUIMOD_1H_BMDM_DN       | 65  | 188 | 16065 | 4169 | 1.347898 | 0.003885 |
| salmon     | 8499  | GSE12366_PLASMA_CELL_VS_NAIVE_BCELL_DN       | 6   | 191 | 16062 | 127  | 4.0202   | 0.003889 |
| salmon     | 9030  | GSE17721_PAM3CSK4_VS_GADIQUIMOD_8H_BMDM_     | 6   | 191 | 16062 | 127  | 4.0202   | 0.003889 |
| salmon     | 9994  | GSE3982_MAST_CELL_VS_MAC_UP                  | 6   | 191 | 16062 | 127  | 4.0202   | 0.003889 |
| yellow     | 9092  | GSE17721_0.5H_VS_12H_LPS_BMDM_UP             | 28  | 188 | 16065 | 1426 | 1.697517 | 0.00389  |
| magenta    | 7725  | MIKKELSEN_MEF_HCP_WITH_H3K27ME3              | 9   | 300 | 15953 | 167  | 2.919701 | 0.003892 |
| brown      | 2843  | KEGG_JAK_STAT_SIGNALING_PATHWAY              | 26  | 113 | 16140 | 2190 | 1.707593 | 0.003895 |
| purple     | 4040  | PID_UPA_UPAR_PATHWAY                         | 3   | 33  | 16220 | 157  | 9.411118 | 0.003901 |
| purple     | 5228  | LANDIS_ERBB2_BREAST_TUMORS_65_DN             | 3   | 33  | 16220 | 157  | 9.411118 | 0.003901 |
| purple     | 5616  | WEINMANN_ADAPTATION_TO_HYPOXIA_DN            | 3   | 33  | 16220 | 157  | 9.411118 | 0.003901 |
| turquoise  | 232   | CHROMOSOME                                   | 45  | 122 | 16131 | 4169 | 1.437985 | 0.003902 |
| magenta    | 7839  | MARTENS_TRETINOIN_RESPONSE_UP                | 12  | 478 | 15775 | 167  | 2.443264 | 0.003914 |
| pink       | 110   | CELL_CORTEX_PART                             | 3   | 23  | 16230 | 228  | 9.298055 | 0.003922 |
| pink       | 7783  | DAZARD_UV_RESPONSE_CLUSTER_G24               | 3   | 23  | 16230 | 228  | 9.298055 | 0.003922 |
| pink       | 291   | SYNAPTOGENESIS                               | 2   | 7   | 16246 | 228  | 20.36717 | 0.003928 |
| pink       | 1130  | SOLUTE_SODIUM_SYMPORTER_ACTIVITY             | 2   | 7   | 16246 | 228  | 20.36717 | 0.003928 |
| pink       | 4277  | REACTOME_ABACAVIR_TRANSPORT_AND_METABOLISI   | 2   | 7   | 16246 | 228  | 20.36717 | 0.003928 |
| pink       | 4520  | REACTOME_NA_CL_DEPENDENT_NEUROTRANSMITTER    | 2   | 7   | 16246 | 228  | 20.36717 | 0.003928 |
| pink       | 7256  | MOOTHA_ROS                                   | 2   | 7   | 16246 | 228  | 20.36717 | 0.003928 |
| greenyello | 9258  | GSE20366_TREG_VS_TCONV_UP                    | 6   | 162 | 16091 | 150  | 4.013086 | 0.003932 |
| blue       | 5074  | SENESE_HDAC3_TARGETS_DN                      | 111 | 479 | 15774 | 2978 | 1.264726 | 0.003934 |
| greenyello | 1979  | TTTGAC,MIR-19A,MIR-19B                       | 11  | 465 | 15788 | 150  | 2.563197 | 0.003937 |
| lightcyan  | 9833  | GSE360_L_DONOVANI_VS_T_GONDII_DC_DN          | 4   | 169 | 16084 | 62   | 6.204619 | 0.003938 |
| brown      | 860   | CELLULAR_LOCALIZATION                        | 64  | 343 | 15910 | 2190 | 1.384762 | 0.003942 |
| pink       | 7863  | CHICAS_RB1_TARGETS_CONFLUENT                 | 15  | 490 | 15763 | 228  | 2.182197 | 0.003952 |
| greenyello | 413   | ANATOMICAL_STRUCTURE_MORPHOGENESIS           | 8   | 274 | 15979 | 150  | 3.163601 | 0.003953 |
| purple     | 9238  | GSE18791_UNSTIM_VS_NEWCATSLE_VIRUS_DC_1H_UI  | 5   | 108 | 16145 | 157  | 4.792699 | 0.003959 |
| cyan       | 1289  | TRANSCRIPTION_REPRESSOR_ACTIVITY             | 4   | 136 | 16117 | 77   | 6.208174 | 0.00396  |
| grey60     | 8347  | STK33_SKM_DN                                 | 4   | 240 | 16013 | 44   | 6.156439 | 0.003962 |
| brown      | 10061 | GSE3982_BCELL_VS_BASOPHIL_DN                 | 37  | 177 | 16076 | 2190 | 1.551379 | 0.003964 |
| purple     | 2973  | BIOCARTA_EXTRINSIC_PATHWAY                   | 2   | 10  | 16243 | 157  | 20.70446 | 0.003965 |
| purple     | 4296  | REACTOME_PLATELET_ADHESION_TO_EXPOSED_COLL/  | 2   | 10  | 16243 | 157  | 20.70446 | 0.003965 |
| cyan       | 7053  | SMID_BREAST_CANCER_RELAPSE_IN_BONE_DN        | 5   | 221 | 16032 | 77   | 4.775519 | 0.00397  |
| brown      | 6420  | KAAB_FAILED_HEART_ATRIUM_DN                  | 30  | 136 | 16117 | 2190 | 1.637087 | 0.003973 |
| brown      | 10129 | GSE6269_HEALTHY_VS_E_COLI_INF_PBMCDN         | 30  | 136 | 16117 | 2190 | 1.637087 | 0.003973 |
| turquoise  | 4771  | REACTOME_S_PHASE                             | 40  | 106 | 16147 | 4169 | 1.471146 | 0.003975 |
| blue       | 1264  | ATP_DEPENDENT_RNA_HELICASE_ACTIVITY          | 8   | 16  | 16237 | 2978 | 2.728845 | 0.003981 |
| blue       | 2772  | KEGG_ONE_CARBON_POOL_BY_FOLATE               | 8   | 16  | 16237 | 2978 | 2.728845 | 0.003981 |
| blue       | 4605  | REACTOME_AMINO_ACID_SYNTHESIS_AND_INTERCON   | 8   | 16  | 16237 | 2978 | 2.728845 | 0.003981 |
| cyan       | 7270  | FERRARI_RESPONSE_TO_FENRETINIDE_UP           | 2   | 20  | 16233 | 77   | 21.10779 | 0.003983 |
| brown      | 10125 | GSE5960_TH1_VS_ANERGIC_TH1_DN                | 38  | 183 | 16070 | 2190 | 1.541068 | 0.003983 |
| salmon     | 8388  | KAECH_NAIVE_VS_DAY15_EFF_CD8_TCELL_UP        | 6   | 192 | 16061 | 127  | 3.999262 | 0.00399  |
| salmon     | 9378  | GSE22886_NAIVE_CD4_TCELL_VS_DC_UP            | 6   | 192 | 16061 | 127  | 3.999262 | 0.00399  |
| salmon     | 9737  | GSE31082_DP_VS_CD4_SP_THYMOCYTE_DN           | 6   | 192 | 16061 | 127  | 3.999262 | 0.00399  |
| brown      | 9337  | GSE22886_NAIVE_BCELL_VS_BM_PLASMA_CELL_DN    | 39  | 189 | 16064 | 2190 | 1.531413 | 0.003994 |
| brown      | 10024 | GSE3982_DC_VS_NKCELL_UP                      | 39  | 189 | 16064 | 2190 | 1.531413 | 0.003994 |
| brown      | 8616  | GSE14000_UNSTIM_VS_16H_LPS_DC_TRANSLATED_RN  | 40  | 195 | 16058 | 2190 | 1.522351 | 0.003997 |

|             |                                                           |     |     |       |      |          |          |
|-------------|-----------------------------------------------------------|-----|-----|-------|------|----------|----------|
| red         | 10097 GSE3982_NKCELL_VS_TH1_DN                            | 14  | 193 | 16060 | 524  | 2.249951 | 0.004002 |
| red         | 10259 GSE9650_NAIVE_VS_MEMORY_CD8_TCELL_DN                | 14  | 193 | 16060 | 524  | 2.249951 | 0.004002 |
| tan         | 6225 MAGRANGEAS_MULTIPLE_MYELOMA_IGLL_VS_IGLK_U           | 3   | 36  | 16217 | 145  | 9.340805 | 0.004003 |
| lightcyan   | 4844 SENGUPTA_NASOPHARYNGEAL_CARCINOMA_UP                 | 5   | 276 | 15977 | 62   | 4.749007 | 0.004004 |
| purple      | 6523 LINDVALL_IMMORTALIZED_BY_TERT_UP                     | 4   | 67  | 16186 | 157  | 6.180435 | 0.004006 |
| purple      | 6751 JI_RESPONSE_TO_FSH_UP                                | 4   | 67  | 16186 | 157  | 6.180435 | 0.004006 |
| purple      | 6949 LEE_METASTASIS_AND_ALTERNATIVE_SPLICING_UP           | 4   | 67  | 16186 | 157  | 6.180435 | 0.004006 |
| red         | 6863 MARSON_BOUND_BY_FOXP3_STIMULATED                     | 47  | 978 | 15275 | 524  | 1.4906   | 0.004012 |
| blue        | 2736 KEGG_VALINE_LEUCINE_AND_ISOLEUCINE_BIOSYNTHESIS_UP   | 6   | 10  | 16243 | 2978 | 3.274614 | 0.004018 |
| blue        | 5415 BAKER_HEMATOPOESIS_STAT1_TARGETS                     | 6   | 10  | 16243 | 2978 | 3.274614 | 0.004018 |
| lightcyan   | 9054 GSE17721_LPS_VS_CPG_24H_BMDM_UP                      | 4   | 170 | 16083 | 62   | 6.168121 | 0.004022 |
| lightcyan   | 9513 GSE2706_R848_VS_LPS_8H_STIM_DC_DN                    | 4   | 170 | 16083 | 62   | 6.168121 | 0.004022 |
| brown       | 3482 ST_B_CELL_ANTIGEN_RECEPTOR                           | 12  | 39  | 16214 | 2190 | 2.283527 | 0.00403  |
| brown       | 4916 CASORELLI_APL_SECONDARY_VS_DE_NOVO_UP                | 12  | 39  | 16214 | 2190 | 2.283527 | 0.00403  |
| brown       | 6712 VARELA_ZMPSTE24_TARGETS_UP                           | 12  | 39  | 16214 | 2190 | 2.283527 | 0.00403  |
| yellow      | 3358 chr1p36                                              | 39  | 287 | 15966 | 1426 | 1.548805 | 0.004038 |
| turquoise   | 8621 GSE14000_UNSTIM_VS_16H_LPS_DC_DN                     | 67  | 195 | 16058 | 4169 | 1.339497 | 0.00404  |
| turquoise   | 8770 GSE15750_DAY6_VS_DAY10_EFF_CD8_TCELL_UP              | 67  | 195 | 16058 | 4169 | 1.339497 | 0.00404  |
| turquoise   | 9209 GSE17974_2H_VS_72H_UNTREATED_IN_VITRO_CD4_T          | 67  | 195 | 16058 | 4169 | 1.339497 | 0.00404  |
| red         | 7647 BOYLAN_MULTIPLE_MYELOMA_PCA3_DN                      | 7   | 63  | 16190 | 524  | 3.446353 | 0.004041 |
| lightyellow | 8286 ESC_J1_UP_EARLY.V1_UP                                | 3   | 159 | 16094 | 33   | 9.292739 | 0.004042 |
| lightyellow | 8594 GSE13485_PRE_VS_POST_YF17D_VACCINATION_PBMC          | 3   | 159 | 16094 | 33   | 9.292739 | 0.004042 |
| brown       | 8306 EIF4E_UP                                             | 22  | 91  | 16162 | 2190 | 1.794199 | 0.004043 |
| pink        | 4902 PUIFFE_INVASION_INHIBITED_BY_ASCITES_UP              | 5   | 75  | 16178 | 228  | 4.752339 | 0.004046 |
| lightyellow | 7892 FIGUEROA_AML_METHYLATION_CLUSTER_7_DN                | 1   | 2   | 16251 | 33   | 246.2576 | 0.004057 |
| lightcyan   | 3443 chr4q32                                              | 2   | 25  | 16228 | 62   | 20.97161 | 0.004059 |
| salmon      | 2319 MORF_PCNA                                            | 4   | 83  | 16170 | 127  | 6.167536 | 0.00406  |
| red         | 4565 REACTOME_GPCR_LIGAND_BINDING                         | 16  | 235 | 16018 | 524  | 2.111808 | 0.004064 |
| red         | 1526 V\$CEBPB_01                                          | 15  | 214 | 16039 | 524  | 2.174101 | 0.004066 |
| turquoise   | 2562 GCM_UBE2N                                            | 55  | 155 | 16098 | 4169 | 1.383352 | 0.004067 |
| magenta     | 5149 GOZGIT_ESR1_TARGETS_DN                               | 14  | 608 | 15645 | 167  | 2.240998 | 0.004072 |
| pink        | 9018 GSE17721_POLYIC_VS_CPG_24H_BMDM_UP                   | 8   | 181 | 16072 | 228  | 3.150722 | 0.004074 |
| pink        | 7371 SWEET_LUNG_CANCER_KRAS_DN                            | 12  | 351 | 15902 | 228  | 2.437097 | 0.004081 |
| red         | 4866 DAVICIONI_MOLECULAR_ARMS_VS_ERMS_UP                  | 19  | 300 | 15953 | 524  | 1.964421 | 0.004082 |
| red         | 6971 SARRIO_EPITHELIAL_MESENCHYMAL_TRANSITION_DN          | 11  | 134 | 16119 | 524  | 2.546186 | 0.004084 |
| purple      | 6275 HSIAO_LIVER_SPECIFIC_GENES                           | 6   | 156 | 16097 | 157  | 3.981627 | 0.004086 |
| salmon      | 2373 MORF_DAP3                                            | 6   | 193 | 16060 | 127  | 3.97854  | 0.004092 |
| salmon      | 9138 GSE17721_0.5H_VS_12H_GARDIQUIMOD_BMDM_UP             | 6   | 193 | 16060 | 127  | 3.97854  | 0.004092 |
| salmon      | 9466 GSE25087_FETAL_VS_ADULT_TCONV_UP                     | 6   | 193 | 16060 | 127  | 3.97854  | 0.004092 |
| salmon      | 10099 GSE3982_NKCELL_VS_TH2_DN                            | 6   | 193 | 16060 | 127  | 3.97854  | 0.004092 |
| turquoise   | 27 PROTEIN_SERINE_THREONINE_PHOSPHATASE_COMPLEX_UP        | 7   | 10  | 16243 | 4169 | 2.728976 | 0.004095 |
| lightgreen  | 3401 chr1q24                                              | 2   | 37  | 16216 | 42   | 20.91763 | 0.0041   |
| turquoise   | 9190 GSE17974_IL4_AND_ANTI_IL12_VS_UNTREATED_2H_A         | 58  | 165 | 16088 | 4169 | 1.370395 | 0.0041   |
| lightcyan   | 9078 GSE17721_LPS_VS_GARDIQUIMOD_2H_BMDM_UP               | 4   | 171 | 16082 | 62   | 6.132051 | 0.004106 |
| midnightb   | 6127 KIM_GERMINAL_CENTER_T_HELPER_DN                      | 2   | 22  | 16231 | 71   | 20.8105  | 0.004108 |
| lightyellow | 9492 GSE26928_EFF_MEM_VS_CENTR_MEM_CD4_TCELL_UI           | 3   | 160 | 16093 | 33   | 9.234659 | 0.004113 |
| blue        | 2472 MORF_THRA                                            | 14  | 37  | 16216 | 2978 | 2.065072 | 0.004116 |
| black       | 1423 HYDROLASE_ACTIVITY_ACTING_ON_CARBON_NITROGEN_BOND_UP | 3   | 19  | 16234 | 283  | 9.068068 | 0.004117 |
| black       | 6828 LOPES_METHYLATED_IN_COLON_CANCER_UP                  | 3   | 19  | 16234 | 283  | 9.068068 | 0.004117 |
| purple      | 4873 SENGUPTA_NASOPHARYNGEAL_CARCINOMA_WITH_LN            | 5   | 109 | 16144 | 157  | 4.748729 | 0.004117 |
| blue        | 6173 FLECHNER_PBL_KIDNEY_TRANSPLANT_OK_VS_DONOR           | 41  | 150 | 16103 | 2978 | 1.491769 | 0.004123 |
| tan         | 4536 REACTOME_MRNA_DECAY_BY_3_TO_5_EXORIBONUCLEASE_UP     | 2   | 11  | 16242 | 145  | 20.37994 | 0.004124 |
| red         | 858 CYTOKINE_AND_CHEMOKINE_MEDIATED_SIGNALING_PATHWAY_UP  | 4   | 21  | 16232 | 524  | 5.908033 | 0.004131 |
| red         | 2774 KEGG_NICOTINATE_AND_NICOTINAMIDE_METABOLISM_UP       | 4   | 21  | 16232 | 524  | 5.908033 | 0.004131 |
| turquoise   | 8060 WAKABAYASHI_ADIPOGENESIS_PPARG_BOUND_8D              | 187 | 616 | 15637 | 4169 | 1.183484 | 0.00414  |
| turquoise   | 1952 TGCACTG,MIR-148A,MIR-152,MIR-148B                    | 91  | 277 | 15976 | 4169 | 1.280747 | 0.004149 |
| brown       | 6093 PENG_GLUCCOSE_DEPRIVATION_UP                         | 13  | 44  | 16209 | 2190 | 2.192704 | 0.004159 |
| brown       | 6771 JIANG_AGING_HYPOTHALAMUS_UP                          | 13  | 44  | 16209 | 2190 | 2.192704 | 0.004159 |
| purple      | 3511 MODULE_19                                            | 8   | 264 | 15989 | 157  | 3.137039 | 0.004166 |
| green       | 9059 GSE17721_POLYIC_VS_GARDIQUIMOD_1H_BMDM_DN            | 26  | 187 | 16066 | 1305 | 1.731629 | 0.004168 |

|            |                                                     |     |     |       |      |          |          |
|------------|-----------------------------------------------------|-----|-----|-------|------|----------|----------|
| grey60     | 3326 chr21q22                                       | 3   | 120 | 16133 | 44   | 9.234659 | 0.00417  |
| red        | 4891 FULCHER_INFLAMMATORY_RESPONSE_LLECTIN_VS_LPS   | 25  | 437 | 15816 | 524  | 1.774438 | 0.004171 |
| magenta    | 8765 GSE15733_BM_VS_SPLEEN_MEMORY_CD4_TCELL_DN      | 7   | 196 | 16057 | 167  | 3.475834 | 0.004172 |
| magenta    | 10192 GSE7852_TREG_VS_TCONV_LN_UP                   | 7   | 196 | 16057 | 167  | 3.475834 | 0.004172 |
| greenyello | 1520 V\$S8_01                                       | 6   | 164 | 16089 | 150  | 3.964146 | 0.004175 |
| greenyello | 10003 GSE3982_MAST_CELL_VS_EFF_MEMORY_CD4_TCELL_I   | 6   | 164 | 16089 | 150  | 3.964146 | 0.004175 |
| red        | 9441 GSE24634_TREG_VS_TCONV_POST_DAY3_IL4_CONVERT   | 14  | 194 | 16059 | 524  | 2.238353 | 0.00419  |
| red        | 10093 GSE3982_CENT_MEMORY_CD4_TCELL_VS_TH1_DN       | 14  | 194 | 16059 | 524  | 2.238353 | 0.00419  |
| red        | 10222 GSE8868_SPLEEN_VS_INTESTINE_CD11B_POS_CD11C_I | 14  | 194 | 16059 | 524  | 2.238353 | 0.00419  |
| greenyello | 2530 GCM_MAPK10                                     | 4   | 71  | 16182 | 150  | 6.104413 | 0.004195 |
| yellow     | 9337 GSE22886_NAIVE_BCELL_VS_BM_PLASMA_CELL_DN      | 28  | 189 | 16064 | 1426 | 1.688536 | 0.004195 |
| salmon     | 8960 GSE17721_PAM3CSK4_VS_CPG_12H_BMDM_UP           | 6   | 194 | 16059 | 127  | 3.958032 | 0.004196 |
| cyan       | 6794 KRIGE_RESPONSE_TO_TOSEDOSTAT_6HR_UP            | 11  | 929 | 15324 | 77   | 2.499308 | 0.004204 |
| pink       | 6332 ALCALAY_AML_BY_NPM1_LOCALIZATION_DN            | 8   | 182 | 16071 | 228  | 3.13341  | 0.004211 |
| brown      | 1095 LIPID_BINDING                                  | 19  | 75  | 16178 | 2190 | 1.880104 | 0.004214 |
| tan        | 10128 GSE6269_HEALTHY_VS_E_COLI_INF_PBMC_UP         | 6   | 170 | 16083 | 145  | 3.956105 | 0.004215 |
| yellow     | 2272 RCGCANGCGY_V\$NRF1_Q6                          | 100 | 881 | 15372 | 1426 | 1.293713 | 0.004219 |
| lightcyan  | 4926 CHARAFE_BREAST_CANCER_LUMINAL_VS_BASAL_DN      | 6   | 402 | 15851 | 62   | 3.912614 | 0.004219 |
| brown      | 7236 WANG_TUMOR_INVASIVENESS_UP                     | 67  | 363 | 15890 | 2190 | 1.369801 | 0.00422  |
| brown      | 3773 MODULE_321                                     | 25  | 108 | 16145 | 2190 | 1.717931 | 0.004222 |
| purple     | 4337 REACTOME_INTEGRIN_CELL_SURFACE_INTERACTIONS    | 4   | 68  | 16185 | 157  | 6.089547 | 0.004225 |
| purple     | 6235 YAO_HOXA10_TARGETS_VIA_PROGESTERONE_UP         | 4   | 68  | 16185 | 157  | 6.089547 | 0.004225 |
| purple     | 7176 BRUECKNER_TARGETS_OF_MIRLET7A3_DN              | 4   | 68  | 16185 | 157  | 6.089547 | 0.004225 |
| magenta    | 7432 SHAFFER_IRF4_TARGETS_IN_ACTIVATED_DENDRITIC_C  | 4   | 64  | 16189 | 167  | 6.08271  | 0.004232 |
| red        | 2836 KEGG_COMPLEMENT_AND_COAGULATION_CASCADES       | 6   | 48  | 16205 | 524  | 3.877147 | 0.004245 |
| magenta    | 2897 KEGG_ALLOGRAFT_REJECTION                       | 3   | 32  | 16221 | 167  | 9.124064 | 0.004246 |
| greenyello | 1819 V\$HEB_Q6                                      | 7   | 219 | 16034 | 150  | 3.463349 | 0.004246 |
| turquoise  | 9564 GSE27786_BCELL_VS_CD8_TCELL_UP                 | 66  | 192 | 16061 | 4169 | 1.340122 | 0.004247 |
| turquoise  | 9697 GSE29618_PRE_VS_DAY7_POST_TIV_FLU_VACCINE_PD   | 66  | 192 | 16061 | 4169 | 1.340122 | 0.004247 |
| black      | 2022 GTRYCATRR_UNKNOWN                              | 8   | 147 | 16106 | 283  | 3.125502 | 0.004247 |
| purple     | 6851 LEIN_LOCALIZED_TO_PROXIMAL_DENDRITES           | 3   | 34  | 16219 | 157  | 9.13432  | 0.004248 |
| purple     | 7020 HUANG_FOXA2_TARGETS_DN                         | 3   | 34  | 16219 | 157  | 9.13432  | 0.004248 |
| blue       | 3586 MODULE_98                                      | 88  | 369 | 15884 | 2978 | 1.301563 | 0.004251 |
| turquoise  | 5001 GARGALOVIC_RESPONSE_TO_OXIDIZED_PHOSPHOLIPID   | 47  | 129 | 16124 | 4169 | 1.420397 | 0.004256 |
| yellow     | 9181 GSE17974_CTRL_VS_ACT_IL4_AND_ANTI_IL12_24H_CD  | 29  | 198 | 16055 | 1426 | 1.669348 | 0.004269 |
| blue       | 8509 GSE12845_IGD_POS_BLOOD_VS_PRE_GC_TONSIL_BCEI   | 52  | 200 | 16053 | 2978 | 1.418999 | 0.00427  |
| blue       | 9435 GSE24634_NAIVE_CD4_TCELL_VS_DAY5_IL4_CONV_TR   | 52  | 200 | 16053 | 2978 | 1.418999 | 0.00427  |
| blue       | 9913 GSE36476_CTRL_VS_TSST_ACT_72H_MEMORY_CD4_T     | 52  | 200 | 16053 | 2978 | 1.418999 | 0.00427  |
| lightcyan  | 9052 GSE17721_LPS_VS_CPG_16H_BMDM_UP                | 4   | 173 | 16080 | 62   | 6.06116  | 0.004279 |
| cyan       | 4001 PID_REG_GR_PATHWAY                             | 3   | 69  | 16184 | 77   | 9.177301 | 0.00428  |
| salmon     | 4436 REACTOME_MRNA_SPLICING_MINOR_PATHWAY           | 3   | 42  | 16211 | 127  | 9.14117  | 0.004283 |
| salmon     | 6356 ZHAN_MULTIPLE_MYELOMA_HP_UP                    | 3   | 42  | 16211 | 127  | 9.14117  | 0.004283 |
| turquoise  | 2027 GGGCATT,MIR-365                                | 38  | 100 | 16153 | 4169 | 1.481444 | 0.004287 |
| turquoise  | 9196 GSE17974_IL4_AND_ANTI_IL12_VS_UNTREATED_12H_   | 63  | 182 | 16071 | 4169 | 1.349494 | 0.00429  |
| greenyello | 1761 V\$STAT5A_04                                   | 6   | 165 | 16088 | 150  | 3.940121 | 0.0043   |
| salmon     | 8561 GSE13411_PLASMA_CELL_VS_MEMORY_BCELL_DN        | 6   | 195 | 16058 | 127  | 3.937735 | 0.004302 |
| salmon     | 8804 GSE15930_STIM_VS_STIM_AND_IFNAB_48H_CD8_T_C    | 6   | 195 | 16058 | 127  | 3.937735 | 0.004302 |
| salmon     | 9205 GSE17974_0.5H_VS_72H_UNTREATED_IN_VITRO_CD4_   | 6   | 195 | 16058 | 127  | 3.937735 | 0.004302 |
| salmon     | 9397 GSE22886_NAIVE_CD4_TCELL_VS_48H_ACT_TH2_DN     | 6   | 195 | 16058 | 127  | 3.937735 | 0.004302 |
| salmon     | 9991 GSE3982_EOSINOPHIL_VS_TH2_DN                   | 6   | 195 | 16058 | 127  | 3.937735 | 0.004302 |
| turquoise  | 5371 ABDULRAHMAN_KIDNEY_CANCER_VHL_UP               | 4   | 4   | 16249 | 4169 | 3.898537 | 0.004324 |
| black      | 7948 MIKHAYLOVA_OXIDATIVE_STRESS_RESPONSE_VIA_VHL   | 2   | 6   | 16247 | 283  | 19.1437  | 0.004327 |
| green      | 9944 GSE37416_12H_VS_24H_F_TULARENSIS_LVS_NEUTROI   | 27  | 197 | 16056 | 1305 | 1.706949 | 0.004331 |
| brown      | 3017 BIOCARTA_MAPK_PATHWAY                          | 21  | 86  | 16167 | 2190 | 1.812217 | 0.004331 |
| blue       | 10045 GSE3982_MAC_VS_TH2_DN                         | 50  | 191 | 16062 | 2978 | 1.428715 | 0.004334 |
| tan        | 10229 GSE9006_HEALTHY_VS_TYPE_1_DIABETES_PBMC_4MC   | 6   | 171 | 16082 | 145  | 3.93297  | 0.004337 |
| turquoise  | 2372 MORF_DAP                                       | 31  | 78  | 16175 | 4169 | 1.549418 | 0.004346 |
| yellow     | 5503 SCHLOSSER_MYC_AND_SERUM_RESPONSE_SYNERGY       | 8   | 31  | 16222 | 1426 | 2.94132  | 0.004347 |
| brown      | 3003 BIOCARTA_IL22BP_PATHWAY                        | 6   | 13  | 16240 | 2190 | 3.42529  | 0.004367 |
| brown      | 3884 MODULE_492                                     | 6   | 13  | 16240 | 2190 | 3.42529  | 0.004367 |

|            |       |                                              |    |      |       |      |          |          |
|------------|-------|----------------------------------------------|----|------|-------|------|----------|----------|
| brown      | 7356  | CHANG_CORE_SERUM_RESPONSE_DN                 | 41 | 202  | 16051 | 2190 | 1.506336 | 0.004374 |
| brown      | 8491  | GSE11924_TH2_VS_TH17_CD4_TCELL_DN            | 38 | 184  | 16069 | 2190 | 1.532693 | 0.004383 |
| brown      | 8480  | GSE11924_TFH_VS_TH1_CD4_TCELL_UP             | 40 | 196  | 16057 | 2190 | 1.514584 | 0.004384 |
| brown      | 8704  | GSE1460_CD4_THYMOCYTE_VS_NAIVE_CD4_TCELL_AD  | 40 | 196  | 16057 | 2190 | 1.514584 | 0.004384 |
| brown      | 4822  | HOLLMANN_APOPTOSIS_VIA_CD40_DN               | 50 | 257  | 15996 | 2190 | 1.443864 | 0.004387 |
| brown      | 8904  | GSE17721_CTRL_VS_GARDIQUIMOD_6H_BMDM_UP      | 39 | 190  | 16063 | 2190 | 1.523353 | 0.004388 |
| brown      | 9154  | GSE17974_0H_VS_2H_IN_VITRO_ACT_CD4_TCELL_UP  | 39 | 190  | 16063 | 2190 | 1.523353 | 0.004388 |
| blue       | 5644  | MOHANKUMAR_TLX1_TARGETS_UP                   | 90 | 379  | 15874 | 2978 | 1.296021 | 0.004388 |
| blue       | 2599  | GNF2_RFC3                                    | 15 | 41   | 16212 | 2978 | 1.996716 | 0.004393 |
| greenyello | 3605  | MODULE_117                                   | 11 | 472  | 15781 | 150  | 2.525184 | 0.004401 |
| greenyello | 98    | ANCHORED_TO_MEMBRANE                         | 2  | 11   | 16242 | 150  | 19.70061 | 0.004406 |
| greenyello | 209   | ANCHORED_TO_PLASMA_MEMBRANE                  | 2  | 11   | 16242 | 150  | 19.70061 | 0.004406 |
| salmon     | 8400  | GOLDRATH_NAIVE_VS_MEMORY_CD8_TCELL_UP        | 6  | 196  | 16057 | 127  | 3.917644 | 0.00441  |
| salmon     | 9683  | GSE29618_PRE_VS_DAY7_FLU_VACCINE_PDC_DN      | 6  | 196  | 16057 | 127  | 3.917644 | 0.00441  |
| salmon     | 10254 | GSE9650_NAIVE_VS_EFF_CD8_TCELL_UP            | 6  | 196  | 16057 | 127  | 3.917644 | 0.00441  |
| greenyello | 2285  | CCAWWNAAGG_V\$SRF_Q4                         | 4  | 72   | 16181 | 150  | 6.01963  | 0.00441  |
| magenta    | 8626  | GSE14026_TH1_VS_TH17_UP                      | 6  | 149  | 16104 | 167  | 3.919061 | 0.004413 |
| blue       | 2535  | GCM_MYST2                                    | 46 | 173  | 16080 | 2978 | 1.451178 | 0.004413 |
| green      | 1758  | CTGRYYYYNATT_UNKNOWN                         | 11 | 56   | 16197 | 1305 | 2.446401 | 0.004419 |
| salmon     | 2420  | MORF_MBD4                                    | 4  | 85   | 16168 | 127  | 6.022418 | 0.00442  |
| blue       | 8689  | GSE1460_INTRATHYMIC_T_PROGENITOR_VS_NAIVE_CI | 44 | 164  | 16089 | 2978 | 1.464258 | 0.004424 |
| magenta    | 2254  | TGTTTGY_V\$HNF3_Q6                           | 13 | 549  | 15704 | 167  | 2.30456  | 0.004432 |
| cyan       | 4751  | REACTOME_CLASS_I_MHC_MEDIATED_ANTIGEN_PROC   | 5  | 227  | 16026 | 77   | 4.649293 | 0.004446 |
| purple     | 3610  | MODULE_122                                   | 5  | 111  | 16142 | 157  | 4.663166 | 0.004448 |
| purple     | 6525  | WANG_CISPLATIN_RESPONSE_AND_XPC_DN           | 7  | 211  | 16042 | 157  | 3.434389 | 0.004449 |
| magenta    | 2240  | CAGGTG_V\$E12_Q6                             | 33 | 2020 | 14233 | 167  | 1.589936 | 0.004451 |
| purple     | 8071  | HUANG_GATA2_TARGETS_DN                       | 4  | 69   | 16184 | 157  | 6.001292 | 0.004452 |
| blue       | 238   | BIOPOLYMER_CATABOLIC_PROCESS                 | 32 | 111  | 16142 | 2978 | 1.573388 | 0.004455 |
| lightcyan  | 9097  | GSE17721_0.5H_VS_8H_LPS_BMDM_DN              | 4  | 175  | 16078 | 62   | 5.991889 | 0.004457 |
| lightcyan  | 9751  | GSE32423_CTRL_VS_IL4_MEMORY_CD8_TCELL_DN     | 4  | 175  | 16078 | 62   | 5.991889 | 0.004457 |
| lightcyan  | 9836  | GSE360_L_DONOVANI_VS_B_MALAYI_LOW_DOSE_DC    | 4  | 175  | 16078 | 62   | 5.991889 | 0.004457 |
| red        | 1949  | TGAATGT,MIR-181A,MIR-181B,MIR-181C,MIR-181D  | 24 | 416  | 15837 | 524  | 1.789452 | 0.004457 |
| brown      | 532   | LEUKOCYTE_DIFFERENTIATION                    | 10 | 30   | 16223 | 2190 | 2.47382  | 0.004459 |
| brown      | 3998  | PID_NETRIN_PATHWAY                           | 10 | 30   | 16223 | 2190 | 2.47382  | 0.004459 |
| brown      | 5817  | SCIAN_INVERSED_TARGETS_OF_TP53_AND_TP73_DN   | 10 | 30   | 16223 | 2190 | 2.47382  | 0.004459 |
| greenyello | 5062  | UDAYAKUMAR_MED1_TARGETS_DN                   | 7  | 221  | 16032 | 150  | 3.432006 | 0.004461 |
| magenta    | 6436  | IVANOVA_HEMATOPOIESIS_STEM_CELL_LONG_TERM    | 8  | 251  | 16002 | 167  | 3.10194  | 0.004464 |
| salmon     | 4648  | REACTOME_ACTIVATION_OF_IRF3_IRF7_MEDIATED_BY | 2  | 13   | 16240 | 127  | 19.68867 | 0.004466 |
| salmon     | 4663  | REACTOME_TRAF6_MEDIATED_INDUCATION_OF_TAK1   | 2  | 13   | 16240 | 127  | 19.68867 | 0.004466 |
| salmon     | 7874  | DEMAGALHAES_AGING_DN                         | 2  | 13   | 16240 | 127  | 19.68867 | 0.004466 |
| turquoise  | 9622  | GSE28237_EARLY_VS_LATE_GC_BCELL_UP           | 53 | 149  | 16104 | 4169 | 1.386728 | 0.004473 |
| magenta    | 506   | GENERATION_OF_NEURONS                        | 4  | 65   | 16188 | 167  | 5.989129 | 0.004474 |
| magenta    | 670   | SYNAPSE_ORGANIZATION_AND_BIOGENESIS          | 2  | 10   | 16243 | 167  | 19.46467 | 0.004474 |
| magenta    | 1295  | KINASE_ACTIVATOR_ACTIVITY                    | 2  | 10   | 16243 | 167  | 19.46467 | 0.004474 |
| lightgreen | 8302  | PTEN_DN.V1_UP                                | 3  | 129  | 16124 | 42   | 8.999446 | 0.004474 |
| green      | 2341  | MORF_TFDP2                                   | 26 | 188  | 16065 | 1305 | 1.722418 | 0.004478 |
| purple     | 9201  | GSE17974_IL4_AND_ANTI_IL12_VS_UNTREATED_48H  | 6  | 159  | 16094 | 157  | 3.906502 | 0.004483 |
| green      | 3996  | PID_TELOMERASEPATHWAY                        | 12 | 64   | 16189 | 1305 | 2.335201 | 0.004484 |
| midnightb  | 7588  | ONO_AML1_TARGETS_UP                          | 2  | 23   | 16230 | 71   | 19.9057  | 0.004486 |
| pink       | 7923  | BHAT_ESR1_TARGETS_NOT_VIA_AKT1_UP            | 8  | 184  | 16069 | 228  | 3.099352 | 0.004496 |
| cyan       | 8222  | MTOR_UP.V1_UP                                | 4  | 141  | 16112 | 77   | 5.988026 | 0.004502 |
| brown      | 3004  | BIOCARTA_IL7_PATHWAY                         | 7  | 17   | 16236 | 2190 | 3.055896 | 0.004512 |
| purple     | 345   | SIGNAL_TRANSDUCTION                          | 23 | 1331 | 14922 | 157  | 1.78889  | 0.004513 |
| turquoise  | 9497  | GSE26928_CENTR_MEMORY_VS_CXCR5_POS_CD4_TCE   | 56 | 159  | 16094 | 4169 | 1.37307  | 0.004517 |
| yellow     | 9345  | GSE22886_IGM_MEMORY_BCELL_VS_BM_PLASMA_CE    | 28 | 190  | 16063 | 1426 | 1.679649 | 0.00452  |
| salmon     | 9401  | GSE22886_UNSTIM_VS_IL15_STIM_NKCELL_DN       | 6  | 197  | 16056 | 127  | 3.897758 | 0.00452  |
| salmon     | 9586  | GSE27786_CD4_TCELL_VS_MONO_MAC_UP            | 6  | 197  | 16056 | 127  | 3.897758 | 0.00452  |
| magenta    | 3588  | MODULE_100                                   | 11 | 425  | 15828 | 167  | 2.518957 | 0.004527 |
| red        | 3902  | MODULE_528                                   | 3  | 11   | 16242 | 524  | 8.45923  | 0.004531 |
| red        | 4904  | PIEPOLI_LGI1_TARGETS_UP                      | 3  | 11   | 16242 | 524  | 8.45923  | 0.004531 |

|             |                                                    |     |      |       |      |          |          |
|-------------|----------------------------------------------------|-----|------|-------|------|----------|----------|
| blue        | 1937 V\$T3R_Q6                                     | 51  | 196  | 16057 | 2978 | 1.420113 | 0.004546 |
| lightgreen  | 7101 EHLERS_ANEUPLOIDY_UP                          | 2   | 39   | 16214 | 42   | 19.84493 | 0.004547 |
| lightcyan   | 8815 GSE16522_MEMORY_VS_NAIVE_CD8_TCELL_DN         | 4   | 176  | 16077 | 62   | 5.957845 | 0.004548 |
| lightcyan   | 9965 GSE3982_DC_VS_MAC_LPS_STIM_DN                 | 4   | 176  | 16077 | 62   | 5.957845 | 0.004548 |
| greenyellow | 1553 V\$OCT1_04                                    | 6   | 167  | 16086 | 150  | 3.892934 | 0.004559 |
| magenta     | 5050 TONKS_TARGETS_OF_RUNX1_RUNX1T1_FUSION_ERYT    | 6   | 150  | 16103 | 167  | 3.892934 | 0.004559 |
| lightyellow | 9978 GSE3982_EOSINOPHIL_VS_BCELL_UP                | 3   | 166  | 16087 | 33   | 8.900876 | 0.004559 |
| magenta     | 7891 FIGUEROA_AML_METHYLATION_CLUSTER_7_UP         | 5   | 105  | 16148 | 167  | 4.634445 | 0.004561 |
| blue        | 2572 GNF2_ATM                                      | 12  | 30   | 16223 | 2978 | 2.183076 | 0.004567 |
| pink        | 4404 REACTOME_TRANSMEMBRANE_TRANSPORT_OF_SMAI      | 11  | 311  | 15942 | 228  | 2.521338 | 0.00457  |
| brown       | 464 ACTIN_FILAMENT_BASED_PROCESS                   | 24  | 103  | 16150 | 2190 | 1.729273 | 0.004571 |
| salmon      | 3643 MODULE_158                                    | 3   | 43   | 16210 | 127  | 8.928585 | 0.004578 |
| tan         | 7533 COULOUARN_TEMPORAL_TGFB1_SIGNATURE_DN         | 5   | 121  | 16132 | 145  | 4.631804 | 0.004582 |
| black       | 6533 MEDINA_SMARCA4_TARGETS                        | 4   | 39   | 16214 | 283  | 5.890369 | 0.004584 |
| red         | 1632 V\$CHOP_01                                    | 14  | 196  | 16057 | 524  | 2.215513 | 0.004588 |
| red         | 8605 GSE13738_RESTING_VS_BYSTANDER_ACTIVATED_CD4_  | 14  | 196  | 16057 | 524  | 2.215513 | 0.004588 |
| yellow      | 9324 GSE22886_CD8_TCELL_VS_BCELL_NAIVE_UP          | 29  | 199  | 16054 | 1426 | 1.660959 | 0.00459  |
| black       | 7441 MEISSNER_BRAIN_HCP_WITH_H3K27ME3              | 7   | 118  | 16135 | 283  | 3.406929 | 0.004598 |
| grey60      | 7443 MEISSNER_BRAIN_HCP_WITH_H3K4ME3_AND_H3K27M    | 7   | 779  | 15474 | 44   | 3.319261 | 0.004601 |
| magenta     | 3625 MODULE_137                                    | 11  | 426  | 15827 | 167  | 2.513044 | 0.004606 |
| lightcyan   | 3580 MODULE_92                                     | 3   | 88   | 16165 | 62   | 8.936767 | 0.004607 |
| lightyellow | 2670 GNF2_MLF1                                     | 2   | 50   | 16203 | 33   | 19.70061 | 0.004608 |
| turquoise   | 6261 YU_MYC_TARGETS_UP                             | 19  | 42   | 16211 | 4169 | 1.763624 | 0.004609 |
| blue        | 10081 GSE3982_BASOPHIL_VS_TH2_DN                   | 49  | 187  | 16066 | 2978 | 1.43009  | 0.004611 |
| purple      | 4591 REACTOME_RNA_POL_I_PROMOTER_OPENING           | 3   | 35   | 16218 | 157  | 8.873339 | 0.004614 |
| yellow      | 3531 MODULE_42                                     | 7   | 25   | 16228 | 1426 | 3.191332 | 0.004617 |
| purple      | 1508 V\$EVI1_05                                    | 5   | 112  | 16141 | 157  | 4.621531 | 0.004621 |
| purple      | 4864 ZHONG_RESPONSE_TO_AZACITIDINE_AND_TSA_UP      | 6   | 160  | 16093 | 157  | 3.882086 | 0.004622 |
| purple      | 8380 LEF1_UP.V1_DN                                 | 6   | 160  | 16093 | 157  | 3.882086 | 0.004622 |
| turquoise   | 9610 GSE27786_NKTCELL_VS_MONO_MAC_UP               | 67  | 196  | 16057 | 4169 | 1.332663 | 0.004627 |
| turquoise   | 9613 GSE27786_ERYTHROBLAST_VS_NEUTROPHIL_DN        | 67  | 196  | 16057 | 4169 | 1.332663 | 0.004627 |
| turquoise   | 9942 GSE37416_OH_VS_48H_F_TULARENSIS_LVS_NEUTROPI  | 67  | 196  | 16057 | 4169 | 1.332663 | 0.004627 |
| blue        | 2475 MORF_TPR                                      | 39  | 142  | 16111 | 2978 | 1.498943 | 0.004628 |
| blue        | 9702 GSE29618_LAIV_VS_TIV_FLU_VACCINE_DAY7_BCELL_U | 39  | 142  | 16111 | 2978 | 1.498943 | 0.004628 |
| blue        | 5083 TIEN_INTESTINE_PROBIOTICS_24HR_UP             | 124 | 545  | 15708 | 2978 | 1.24175  | 0.004631 |
| salmon      | 8726 GSE14769_UNSTIM_VS_360MIN_LPS_BMDM_UP         | 6   | 198  | 16055 | 127  | 3.878072 | 0.004632 |
| salmon      | 9159 GSE17974_OH_VS_6H_IN_VITRO_ACT_CD4_TCELL_DN   | 6   | 198  | 16055 | 127  | 3.878072 | 0.004632 |
| salmon      | 9370 GSE22886_NAIVE_CD8_TCELL_VS_NEUTROPHIL_UP     | 6   | 198  | 16055 | 127  | 3.878072 | 0.004632 |
| magenta     | 2895 KEGG_AUTOIMMUNE_THYROID_DISEASE               | 3   | 33   | 16220 | 167  | 8.847578 | 0.004636 |
| lightcyan   | 4969 WANG_CLIM2_TARGETS_DN                         | 4   | 177  | 16076 | 62   | 5.924184 | 0.00464  |
| lightcyan   | 9066 GSE17721_POLYIC_VS_GARDIQUIMOD_8H_BMDM_UP     | 4   | 177  | 16076 | 62   | 5.924184 | 0.00464  |
| lightcyan   | 10189 GSE7764_IL15_TREATED_VS_CTRL_NK_CELL_24H_DN  | 4   | 177  | 16076 | 62   | 5.924184 | 0.00464  |
| lightcyan   | 7043 MITSIADES_RESPONSE_TO_APLIDIN_UP              | 6   | 410  | 15843 | 62   | 3.836271 | 0.004641 |
| turquoise   | 3291 chr13q14                                      | 28  | 69   | 16184 | 4169 | 1.582015 | 0.004645 |
| red         | 2246 RYTTCTG_V\$ETS2_B                             | 46  | 960  | 15293 | 524  | 1.48624  | 0.004645 |
| blue        | 5060 DITTMER_PTHLH_TARGETS_DN                      | 22  | 69   | 16184 | 2978 | 1.740133 | 0.00465  |
| magenta     | 2194 TCCATTKW_UNKNOWN                              | 7   | 200  | 16053 | 167  | 3.406317 | 0.004655 |
| blue        | 9826 GSE360_DC_VS_MAC_B_MALAYI_LOW_DOSE_UP         | 47  | 178  | 16075 | 2978 | 1.441075 | 0.004661 |
| brown       | 3994 PID_HDAC_CLASSI_PATHWAY                       | 17  | 65   | 16188 | 2190 | 1.940998 | 0.004662 |
| blue        | 6311 HASLINGER_B_CLL_WITH_CHROMOSOME_12_TRISOMI    | 10  | 23   | 16230 | 2978 | 2.372909 | 0.004671 |
| blue        | 2329 MORF_RFC1                                     | 31  | 107  | 16146 | 2978 | 1.5812   | 0.004677 |
| purple      | 2902 KEGG_DILATED_CARDIOMYOPATHY                   | 4   | 70   | 16183 | 157  | 5.91556  | 0.004687 |
| turquoise   | 7357 CHANG_CYCLING_GENES                           | 52  | 146  | 16107 | 4169 | 1.38852  | 0.00469  |
| blue        | 9962 GSE3982_MEMORY_CD4_TCELL_VS_BCELL_UP          | 45  | 169  | 16084 | 2978 | 1.453231 | 0.004691 |
| turquoise   | 10269 GSE9988_ANTI_TREM1_VS_LPS_MONOCYTE_DN        | 64  | 186  | 16067 | 4169 | 1.341432 | 0.004693 |
| red         | 4882 TURASHVILI_BREAST_LOBULAR_CARCINOMA_VS_DUCT   | 6   | 49   | 16204 | 524  | 3.798021 | 0.004708 |
| lightyellow | 10261 GSE9650_EFFECTOR_VS_EXHAUSTED_CD8_TCELL_DN   | 3   | 168  | 16085 | 33   | 8.794913 | 0.004714 |
| tan         | 9490 GSE26928_NAIVE_VS_CXCR5_POS_CD4_TCELL_UP      | 6   | 174  | 16079 | 145  | 3.865161 | 0.004718 |
| purple      | 118 INTEGRAL_TO_MEMBRANE                           | 19  | 1025 | 15228 | 157  | 1.91895  | 0.004726 |
| turquoise   | 1971 GTATGAT,MIR-154,MIR-487                       | 27  | 66   | 16187 | 4169 | 1.594856 | 0.004726 |

|            |       |                                               |     |     |       |      |          |          |
|------------|-------|-----------------------------------------------|-----|-----|-------|------|----------|----------|
| turquoise  | 4878  | TURASHVILI_BREAST_DUCTAL_CARCINOMA_VS_LOBUL   | 27  | 66  | 16187 | 4169 | 1.594856 | 0.004726 |
| lightcyan  | 946   | HUMORAL_IMMUNE_RESPONSE                       | 2   | 27  | 16226 | 62   | 19.41816 | 0.004726 |
| lightcyan  | 7281  | FLOTHO_PEDIATRIC_ALL_THERAPY_RESPONSE_DN      | 2   | 27  | 16226 | 62   | 19.41816 | 0.004726 |
| lightcyan  | 8353  | KRAS.DF.V1_UP                                 | 4   | 178 | 16075 | 62   | 5.890903 | 0.004733 |
| lightcyan  | 9891  | GSE36392_TYPE_2_MYELOID_VS_EOSINOPHIL_IL25_TR | 4   | 178 | 16075 | 62   | 5.890903 | 0.004733 |
| brown      | 4806  | NAKAMURA_TUMOR_ZONE_PERIPHERAL_VS_CENTRAL     | 99  | 572 | 15681 | 2190 | 1.284484 | 0.004735 |
| turquoise  | 9708  | GSE29618_LAIV_VS_TIV_FLU_VACCINE_DAY7_MDC_UF  | 61  | 176 | 16077 | 4169 | 1.351197 | 0.004737 |
| blue       | 5847  | RICKMAN_TUMOR_DIFFERENTIATED_WELL_VS_POORL    | 57  | 224 | 16029 | 2978 | 1.388787 | 0.004737 |
| salmon     | 8783  | GSE15930_NAIVE_VS_48H_IN_VITRO_STIM_CD8_TCELI | 6   | 199 | 16054 | 127  | 3.858584 | 0.004746 |
| magenta    | 1703  | CCTNTMAGA_UNKNOWN                             | 5   | 106 | 16147 | 167  | 4.590724 | 0.004748 |
| greenyello | 5621  | MARTORIATI_MDM4_TARGETS_NEUROEPITHELIUM_DI    | 5   | 118 | 16135 | 150  | 4.591243 | 0.004754 |
| turquoise  | 6613  | BROWNE_HCMV_INFECTION_18HR_UP                 | 58  | 166 | 16087 | 4169 | 1.362139 | 0.004755 |
| lightcyan  | 3616  | MODULE_128                                    | 3   | 89  | 16164 | 62   | 8.836354 | 0.004755 |
| lightgreen | 5023  | BILBAN_B_CLL_LPL_DN                           | 2   | 40  | 16213 | 42   | 19.34881 | 0.004778 |
| lightgreen | 7591  | ONO_FOXP3_TARGETS_DN                          | 2   | 40  | 16213 | 42   | 19.34881 | 0.004778 |
| yellow     | 9539  | GSE27786_LSK_VS_NKTCELL_DN                    | 27  | 182 | 16071 | 1426 | 1.690855 | 0.004779 |
| pink       | 4845  | SENGUPTA_NASOPHARYNGEAL_CARCINOMA_DN          | 10  | 269 | 15984 | 228  | 2.650003 | 0.004782 |
| blue       | 6096  | MENSSEN_MYC_TARGETS                           | 18  | 53  | 16200 | 2978 | 1.853555 | 0.004784 |
| pink       | 6385  | MOREAUX_B_LYMPHOCYTE_MATURATION_BY_TACI_U     | 5   | 78  | 16175 | 228  | 4.569557 | 0.004785 |
| turquoise  | 5029  | AKL_HTLV1_INFECTION_DN                        | 26  | 63  | 16190 | 4169 | 1.60892  | 0.004793 |
| brown      | 9839  | GSE360_L_DONOVANI_VS_M_TUBERCULOSIS_DC_DN     | 36  | 173 | 16080 | 2190 | 1.54435  | 0.004796 |
| red        | 10036 | GSE3982_MAC_VS_EFF_MEMORY_CD4_TCELL_UP        | 14  | 197 | 16056 | 524  | 2.204266 | 0.004797 |
| red        | 10151 | GSE7460_TCONV_VS_TREG_LN_DN                   | 14  | 197 | 16056 | 524  | 2.204266 | 0.004797 |
| red        | 10232 | GSE9006_TYPE_1_DIABETES_AT_DX_VS_1MONTH_POS   | 14  | 197 | 16056 | 524  | 2.204266 | 0.004797 |
| greenyello | 1537  | V\$MYCMAX_02                                  | 7   | 224 | 16029 | 150  | 3.386042 | 0.004799 |
| brown      | 8586  | GSE13485_DAY1_VS_DAY21_YF17D_VACCINE_PBMC_U   | 37  | 179 | 16074 | 2190 | 1.534045 | 0.004811 |
| cyan       | 1402  | LIPID_TRANSPORTER_ACTIVITY                    | 2   | 22  | 16231 | 77   | 19.1889  | 0.004813 |
| red        | 2709  | GNF2_TNFRSF1B                                 | 7   | 65  | 16188 | 524  | 3.340311 | 0.004813 |
| brown      | 8725  | GSE14769_UNSTIM_VS_240MIN_LPS_BMDM_DN         | 39  | 191 | 16062 | 2190 | 1.515377 | 0.004814 |
| brown      | 9123  | GSE17721_ALL_VS_24H_PAM3CSK4_BMDM_DN          | 39  | 191 | 16062 | 2190 | 1.515377 | 0.004814 |
| brown      | 10175 | GSE7460_FOXP3_MUT_VS_WT_ACT_WITH_TGFB_TCOI    | 39  | 191 | 16062 | 2190 | 1.515377 | 0.004814 |
| purple     | 3872  | MODULE_470                                    | 2   | 11  | 16242 | 157  | 18.82224 | 0.004816 |
| purple     | 5724  | TOMLINS_METASTASIS_UP                         | 2   | 11  | 16242 | 157  | 18.82224 | 0.004816 |
| purple     | 6433  | WHITESIDE_CISPLATIN_RESISTANCE_UP             | 2   | 11  | 16242 | 157  | 18.82224 | 0.004816 |
| purple     | 6507  | EHRlich_ICF_SYNDROM_UP                        | 2   | 11  | 16242 | 157  | 18.82224 | 0.004816 |
| brown      | 8925  | GSE17721_LPS_VS_POLYIC_12H_BMDM_DN            | 38  | 185 | 16068 | 2190 | 1.524408 | 0.004817 |
| brown      | 9924  | GSE37416_CTRL_VS_3H_F_TULARENSIS_LVS_NEUTROP  | 38  | 185 | 16068 | 2190 | 1.524408 | 0.004817 |
| midnightb  | 9514  | GSE2706_R848_VS_R848_AND_LPS_2H_STIM_DC_UP    | 4   | 156 | 16097 | 71   | 5.869628 | 0.00482  |
| turquoise  | 498   | PROTEIN_DNA_COMPLEX_ASSEMBLY                  | 21  | 48  | 16205 | 4169 | 1.70561  | 0.004821 |
| turquoise  | 4338  | REACTOME_REGULATION_OF_ORNITHINE_DECARBOXY    | 21  | 48  | 16205 | 4169 | 1.70561  | 0.004821 |
| lightcyan  | 9629  | GSE2826_XID_VS_BTK_KO_BCELL_DN                | 4   | 179 | 16074 | 62   | 5.857992 | 0.004828 |
| lightcyan  | 10155 | GSE7460_CTRL_VS_TGFB_TREATED_ACT_CD8_TCELL_D  | 4   | 179 | 16074 | 62   | 5.857992 | 0.004828 |
| turquoise  | 3046  | BIOCARTA_PROTEASOME_PATHWAY                   | 14  | 28  | 16225 | 4169 | 1.949268 | 0.004829 |
| turquoise  | 3353  | chr12q21                                      | 14  | 28  | 16225 | 4169 | 1.949268 | 0.004829 |
| blue       | 1713  | V\$SPZ1_01                                    | 50  | 192 | 16061 | 2978 | 1.421273 | 0.004839 |
| blue       | 10059 | GSE3982_NEUTROPHIL_VS_TH2_DN                  | 50  | 192 | 16061 | 2978 | 1.421273 | 0.004839 |
| brown      | 2487  | GCM_BCL2L1                                    | 11  | 35  | 16218 | 2190 | 2.332459 | 0.00485  |
| brown      | 4092  | PID_PI3KCIKTPATHWAY                           | 11  | 35  | 16218 | 2190 | 2.332459 | 0.00485  |
| brown      | 7345  | RUIZ_TNC_TARGETS_UP                           | 29  | 132 | 16121 | 2190 | 1.630473 | 0.004859 |
| salmon     | 8785  | GSE15930_NAIVE_VS_48H_IN_VITRO_STIM_IL12_CD8_ | 6   | 200 | 16053 | 127  | 3.839291 | 0.004862 |
| greenyello | 2031  | AGGGCCA,MIR-328                               | 4   | 74  | 16179 | 150  | 5.856937 | 0.004863 |
| yellow     | 9215  | GSE17974_2.5H_VS_72H_IL4_AND_ANTI_IL12_ACT_CD | 28  | 191 | 16062 | 1426 | 1.670855 | 0.004865 |
| turquoise  | 8878  | GSE17721_CTRL_VS_PAM3CSK4_24H_BMDM_UP         | 66  | 193 | 16060 | 4169 | 1.333178 | 0.004866 |
| turquoise  | 208   | INTRINSIC_TO_ORGANELLE_MEMBRANE               | 22  | 51  | 16202 | 4169 | 1.681722 | 0.00487  |
| turquoise  | 2018  | CAAGGAT,MIR-362                               | 24  | 57  | 16196 | 4169 | 1.641489 | 0.004877 |
| red        | 2820  | KEGG_APOPTOSIS                                | 8   | 82  | 16171 | 524  | 3.026066 | 0.004878 |
| lightgreen | 6968  | WALLACE_PROSTATE_CANCER_RACE_UP               | 4   | 267 | 15986 | 42   | 5.797396 | 0.004882 |
| salmon     | 2795  | KEGG_PROTEASOME                               | 3   | 44  | 16209 | 127  | 8.725662 | 0.004885 |
| salmon     | 3613  | MODULE_125                                    | 3   | 44  | 16209 | 127  | 8.725662 | 0.004885 |
| brown      | 2249  | MGGAAAGTG_V\$GABP_B                           | 122 | 725 | 15528 | 2190 | 1.248853 | 0.004897 |



|             |                                                    |     |      |       |      |          |          |
|-------------|----------------------------------------------------|-----|------|-------|------|----------|----------|
| blue        | 9308 GSE22886_NAIVE_CD8_TCELL_VS_MEMORY_TCELL_UP   | 48  | 183  | 16070 | 2978 | 1.431525 | 0.004907 |
| red         | 9146 GSE17721_4_VS_24H_GARDIQUIMOD_BMDM_UP         | 13  | 177  | 16076 | 524  | 2.278098 | 0.004909 |
| pink        | 9541 GSE27786_LSK_VS_ERYTHROBLAST_DN               | 7   | 148  | 16105 | 228  | 3.371592 | 0.004909 |
| tan         | 3740 MODULE_279                                    | 5   | 123  | 16130 | 145  | 4.55649  | 0.00491  |
| lightcyan   | 9033 GSE17721_PAM3CSK4_VS_GADIQUIMOD_12H_BMDM      | 4   | 180  | 16073 | 62   | 5.825448 | 0.004924 |
| purple      | 5855 FRIDMAN_SENESCENCE_UP                         | 4   | 71   | 16182 | 157  | 5.832242 | 0.00493  |
| purple      | 6434 LEE_CALORIE_RESTRICTION_NEOCORTEX_UP          | 4   | 71   | 16182 | 157  | 5.832242 | 0.00493  |
| purple      | 7200 HUANG_DASATINIB_RESISTANCE_UP                 | 4   | 71   | 16182 | 157  | 5.832242 | 0.00493  |
| magenta     | 7871 HOELZEL_NF1_TARGETS_UP                        | 5   | 107  | 16146 | 167  | 4.54782  | 0.00494  |
| brown       | 6953 MARTINEZ_RB1_TARGETS_UP                       | 101 | 586  | 15667 | 2190 | 1.279126 | 0.004944 |
| lightyellow | 8258 LTE2_UP.V1_UP                                 | 3   | 171  | 16082 | 33   | 8.640617 | 0.004952 |
| yellow      | 7991 BILANGES_SERUM_AND_RAPAMYCIN_SENSITIVE_GENE   | 13  | 67   | 16186 | 1426 | 2.211478 | 0.004956 |
| red         | 160 CYTOPLASMIC_MEMBRANE_BOUND_VESICLE             | 9   | 100  | 16153 | 524  | 2.791546 | 0.004974 |
| lightgreen  | 6971 SARRIO_EPITHELIAL_MESENCHYMAL_TRANSITION_DN   | 3   | 134  | 16119 | 42   | 8.663646 | 0.004974 |
| grey60      | 4610 REACTOME_IL_3_5_AND_GM_CSF_SIGNALING          | 2   | 39   | 16214 | 44   | 18.94289 | 0.004981 |
| turquoise   | 4828 ONKEN_UVEAL_MELANOMA_DN                       | 150 | 486  | 15767 | 4169 | 1.203252 | 0.004983 |
| red         | 2618 GNF2_CD14                                     | 5   | 35   | 16218 | 524  | 4.431025 | 0.004987 |
| blue        | 9639 GSE29615_CTRL_VS_DAY3_LAIV_IFLU_VACCINE_PBMC  | 42  | 156  | 16097 | 2978 | 1.469378 | 0.004989 |
| pink        | 308 PROTEIN_AMINO_ACID_N_LINKED_GLYCOSYLATION      | 3   | 25   | 16228 | 228  | 8.554211 | 0.004989 |
| salmon      | 2445 MORF_PRKAR1A                                  | 5   | 141  | 16112 | 127  | 4.538169 | 0.004995 |
| purple      | 2287 TATAAA_V\$TATA_01                             | 17  | 880  | 15373 | 157  | 1.999862 | 0.005    |
| turquoise   | 2108 ATAAGCT,MIR-21                                | 39  | 104  | 16149 | 4169 | 1.461951 | 0.005    |
| brown       | 703 REGULATION_OF_TRANSCRIPTIONDNA_DEPENDENT       | 73  | 404  | 15849 | 2190 | 1.341007 | 0.00501  |
| brown       | 7391 LEE_EARLY_T_LYMPHOCYTE_DN                     | 15  | 55   | 16198 | 2190 | 2.024035 | 0.005011 |
| purple      | 3535 MODULE_46                                     | 9   | 332  | 15921 | 157  | 2.806327 | 0.005014 |
| lightgreen  | 5510 FARMER_BREAST_CANCER_CLUSTER_1                | 2   | 41   | 16212 | 42   | 18.87689 | 0.005015 |
| magenta     | 9684 GSE29618_PRE_VS_DAY7_FLU_VACCINE_MDC_UP       | 6   | 153  | 16100 | 167  | 3.816602 | 0.005017 |
| lightcyan   | 9068 GSE17721_POLYIC_VS_GARDIQUIMOD_12H_BMDM_U     | 4   | 181  | 16072 | 62   | 5.793263 | 0.005021 |
| green       | 3067 BIOCARTA_ATRBRCA_PATHWAY                      | 6   | 21   | 16232 | 1305 | 3.558402 | 0.005021 |
| greenyello  | 5393 PEREZ_TP53_TARGETS                            | 18  | 1001 | 15252 | 150  | 1.948412 | 0.005033 |
| lightyellow | 8198 EGFR_UP.V1_UP                                 | 3   | 172  | 16081 | 33   | 8.590381 | 0.005033 |
| turquoise   | 363 ACTIVATION_OF_JNK_ACTIVITY                     | 9   | 15   | 16238 | 4169 | 2.339122 | 0.005034 |
| turquoise   | 700 MICROTUBULE_ORGANIZING_CENTER_ORGANIZATION     | 9   | 15   | 16238 | 4169 | 2.339122 | 0.005034 |
| turquoise   | 3216 chr4q24                                       | 9   | 15   | 16238 | 4169 | 2.339122 | 0.005034 |
| turquoise   | 7987 DORMOY_ELAVL1_TARGETS                         | 9   | 15   | 16238 | 4169 | 2.339122 | 0.005034 |
| yellow      | 8833 GSE17721_CTRL_VS_LPS_0.5H_BMDM_DN             | 26  | 174  | 16079 | 1426 | 1.703092 | 0.005046 |
| magenta     | 2926 BIOCARTA_BCR_PATHWAY                          | 3   | 34   | 16219 | 167  | 8.587355 | 0.005047 |
| magenta     | 7365 VANTVEER_BREAST_CANCER_BRCA1_UP               | 3   | 34   | 16219 | 167  | 8.587355 | 0.005047 |
| greenyello  | 7908 CHYLA_CBFA2T3_TARGETS_UP                      | 9   | 348  | 15905 | 150  | 2.802241 | 0.005047 |
| purple      | 7216 WINTER_HYPOXIA_METAGENE                       | 7   | 216  | 16037 | 157  | 3.354889 | 0.005049 |
| brown       | 379 INTRACELLULAR_TRANSPORT                        | 51  | 265  | 15988 | 2190 | 1.428281 | 0.005051 |
| lightcyan   | 3567 MODULE_79                                     | 3   | 91   | 16162 | 62   | 8.642148 | 0.005059 |
| brown       | 3175 chr11q24                                      | 12  | 40   | 16213 | 2190 | 2.226438 | 0.005064 |
| brown       | 6608 GENTILE_UV_RESPONSE_CLUSTER_D7                | 12  | 40   | 16213 | 2190 | 2.226438 | 0.005064 |
| blue        | 9253 GSE19825_CD24LOW_VS_IL2RA_HIGH_DAY3_EFF_CD8   | 51  | 197  | 16056 | 2978 | 1.412904 | 0.005065 |
| blue        | 3184 chr10p15                                      | 13  | 34   | 16219 | 2978 | 2.086764 | 0.005065 |
| blue        | 3739 MODULE_278                                    | 13  | 34   | 16219 | 2978 | 2.086764 | 0.005065 |
| red         | 4827 ONKEN_UVEAL_MELANOMA_UP                       | 38  | 761  | 15492 | 524  | 1.548821 | 0.005076 |
| green       | 1649 V\$RFX1_02                                    | 31  | 238  | 16015 | 1305 | 1.622213 | 0.005091 |
| blue        | 236 DNA_METABOLIC_PROCESS                          | 62  | 248  | 16005 | 2978 | 1.364422 | 0.005098 |
| black       | 7403 SHEDDEN_LUNG_CANCER_GOOD_SURVIVAL_A5          | 5   | 64   | 16189 | 283  | 4.486804 | 0.005099 |
| red         | 5140 DODD_NASOPHARYNGEAL_CARCINOMA_UP              | 64  | 1439 | 14814 | 524  | 1.379499 | 0.005107 |
| turquoise   | 8884 GSE17721_CTRL_VS_CPG_2H_BMDM_UP               | 65  | 190  | 16063 | 4169 | 1.33371  | 0.005117 |
| turquoise   | 9520 GSE2706_LPS_VS_R848_AND_LPS_8H_STIM_DC_UP     | 65  | 190  | 16063 | 4169 | 1.33371  | 0.005117 |
| lightcyan   | 8565 GSE13484_UNSTIM_VS_12H_YF17D_VACCINE_STIM_PI  | 4   | 182  | 16071 | 62   | 5.761432 | 0.005119 |
| lightcyan   | 8972 GSE17721_CPG_VS_GARDIQUIMOD_4H_BMDM_UP        | 4   | 182  | 16071 | 62   | 5.761432 | 0.005119 |
| lightcyan   | 9100 GSE17721_12H_VS_24H_LPS_BMDM_UP               | 4   | 182  | 16071 | 62   | 5.761432 | 0.005119 |
| tan         | 8602 GSE13738_RESTING_VS_TCR_ACTIVATED_CD4_TCELL_U | 6   | 177  | 16076 | 145  | 3.799649 | 0.005124 |
| greenyello  | 5938 AMIT_EGF_RESPONSE_480_MCF10A                  | 3   | 38   | 16215 | 150  | 8.554211 | 0.005131 |
| greenyello  | 7463 CROONQUIST_NRAS_SIGNALING_UP                  | 3   | 38   | 16215 | 150  | 8.554211 | 0.005131 |

|             |       |                                              |     |     |       |      |          |          |
|-------------|-------|----------------------------------------------|-----|-----|-------|------|----------|----------|
| magenta     | 3688  | MODULE_208                                   | 5   | 108 | 16145 | 167  | 4.505711 | 0.005137 |
| red         | 9231  | GSE18791_CTRL_VS_NEWCASTLE_VIRUS_DC_12H_DN   | 13  | 178 | 16075 | 524  | 2.265299 | 0.005145 |
| red         | 9795  | GSE360_CTRL_VS_L_MAJOR_DC_DN                 | 13  | 178 | 16075 | 524  | 2.265299 | 0.005145 |
| blue        | 8660  | GSE1432_CTRL_VS_IFNG_6H_MICROGLIA_UP         | 49  | 188 | 16065 | 2978 | 1.422483 | 0.005151 |
| greenyello  | 6787  | BILD_E2F3_ONCOGENIC_SIGNATURE                | 7   | 227 | 16026 | 150  | 3.341292 | 0.005155 |
| lightyellow | 6915  | KYNG_ENVIRONMENTAL_STRESS_RESPONSE_UP        | 2   | 53  | 16200 | 33   | 18.58548 | 0.005164 |
| turquoise   | 1753  | V\$STAT1_02                                  | 75  | 224 | 16029 | 4169 | 1.305314 | 0.005168 |
| cyan        | 5657  | GRUETZMANN_PANCREATIC_CANCER_UP              | 6   | 336 | 15917 | 77   | 3.769249 | 0.005168 |
| salmon      | 382   | CENTROSOME_ORGANIZATION_AND_BIOGENESIS       | 2   | 14  | 16239 | 127  | 18.28234 | 0.005184 |
| turquoise   | 8976  | GSE17721_CPG_VS_GARDIQUIMOD_8H_BMDM_UP       | 62  | 180 | 16073 | 4169 | 1.342829 | 0.005186 |
| yellow      | 1173  | HYDROLASE_ACTIVITY_HYDROLYZING_N_GLYCOSYL_CC | 4   | 9   | 16244 | 1426 | 5.065607 | 0.005186 |
| yellow      | 4340  | REACTOME_BASE_FREE_SUGAR_PHOSPHATE_REMOVA    | 4   | 9   | 16244 | 1426 | 5.065607 | 0.005186 |
| brown       | 10137 | GSE6269_FLU_VS_STREP_AUREUS_INF_PBMC_DN      | 33  | 156 | 16097 | 2190 | 1.569924 | 0.005189 |
| pink        | 7027  | BOYERINAS_ONCOFETAL_TARGETS_OF_LET7A1        | 2   | 8   | 16245 | 228  | 17.82127 | 0.005189 |
| brown       | 5896  | DEN_INTERACT_WITH_LCA5                       | 9   | 26  | 16227 | 2190 | 2.568967 | 0.005193 |
| magenta     | 3555  | MODULE_66                                    | 11  | 433 | 15820 | 167  | 2.472418 | 0.005195 |
| purple      | 7963  | PASINI_SUZ12_TARGETS_DN                      | 8   | 274 | 15979 | 157  | 3.022549 | 0.005196 |
| brown       | 4139  | REACTOME_SIGNALING_BY_RHO_GTPASES            | 24  | 104 | 16149 | 2190 | 1.712645 | 0.0052   |
| purple      | 4853  | GAZDA_DIAMOND_BLACKFAN_ANEMIA_ERYTHROID_D    | 11  | 461 | 15792 | 157  | 2.470163 | 0.005202 |
| grey60      | 9248  | GSE19825_NAIVE_VS_IL2RALOW_DAY3_EFF_CD8_TCEL | 3   | 130 | 16123 | 44   | 8.524301 | 0.005213 |
| lightcyan   | 3653  | MODULE_170                                   | 3   | 92  | 16161 | 62   | 8.548212 | 0.005216 |
| lightcyan   | 7644  | BOYLAN_MULTIPLE_MYELOMA_PCA1_UP              | 3   | 92  | 16161 | 62   | 8.548212 | 0.005216 |
| lightcyan   | 9088  | GSE17721_LPS_VS_GARDIQUIMOD_16H_BMDM_UP      | 4   | 183 | 16070 | 62   | 5.729949 | 0.005219 |
| yellow      | 4157  | REACTOME_TCA_CYCLE_AND_RESPIRATORY_ELECTRON  | 19  | 115 | 16138 | 1426 | 1.883084 | 0.005221 |
| turquoise   | 8030  | IKEDA_MIR133_TARGETS_DN                      | 5   | 6   | 16247 | 4169 | 3.248781 | 0.00523  |
| turquoise   | 2532  | GCM_MLL                                      | 59  | 170 | 16083 | 4169 | 1.353022 | 0.005231 |
| turquoise   | 8024  | GOBERT_OLIGODENDROCYTE_DIFFERENTIATION_DN    | 287 | 983 | 15270 | 4169 | 1.13823  | 0.005231 |
| yellow      | 8928  | GSE17721_LPS_VS_POLYIC_24H_BMDM_UP           | 28  | 192 | 16061 | 1426 | 1.662152 | 0.005232 |
| red         | 9346  | GSE22886_DAY0_VS_DAY1_MONOCYTE_IN_CULTURE_   | 14  | 199 | 16054 | 524  | 2.182113 | 0.00524  |
| red         | 9659  | GSE29618_BCELL_VS_MDC_DN                     | 14  | 199 | 16054 | 524  | 2.182113 | 0.00524  |
| red         | 9671  | GSE29618_BCELL_VS_MDC_DAY7_FLU_VACCINE_DN    | 14  | 199 | 16054 | 524  | 2.182113 | 0.00524  |
| red         | 7809  | SASSON_RESPONSE_TO_FORSKOLIN_DN              | 8   | 83  | 16170 | 524  | 2.989607 | 0.00525  |
| magenta     | 4337  | REACTOME_INTEGRIN_CELL_SURFACE_INTERACTIONS  | 4   | 68  | 16185 | 167  | 5.724903 | 0.005255 |
| cyan        | 1058  | INDUCTION_OF_APOPTOSIS_BY_INTRACELLULAR_SIGN | 2   | 23  | 16230 | 77   | 18.3546  | 0.005255 |
| cyan        | 3949  | PID_IL27PATHWAY                              | 2   | 23  | 16230 | 77   | 18.3546  | 0.005255 |
| brown       | 8439  | GSE10325_MYELOID_VS_LUPUS_MYELOID_DN         | 40  | 198 | 16055 | 2190 | 1.499285 | 0.005255 |
| brown       | 9439  | GSE24634_NAIVE_CD4_TCELL_VS_DAY10_IL4_CONV_T | 40  | 198 | 16055 | 2190 | 1.499285 | 0.005255 |
| lightgreen  | 3743  | MODULE_284                                   | 2   | 42  | 16211 | 42   | 18.42744 | 0.005257 |
| blue        | 10094 | GSE3982_CENT_MEMORY_CD4_TCELL_VS_TH2_UP      | 45  | 170 | 16083 | 2978 | 1.444683 | 0.005271 |
| pink        | 9427  | GSE24142_ADULT_VS_FETAL_EARLY_THYMIC_PROGEN  | 8   | 189 | 16064 | 228  | 3.017358 | 0.005273 |
| brown       | 9153  | GSE17974_0H_VS_1H_IN_VITRO_ACT_CD4_TCELL_DN  | 39  | 192 | 16061 | 2190 | 1.507484 | 0.005275 |
| brown       | 9445  | GSE24634_TREG_VS_TCONV_POST_DAY7_IL4_CONVERT | 39  | 192 | 16061 | 2190 | 1.507484 | 0.005275 |
| brown       | 9602  | GSE27786_NKCELL_VS_NEUTROPHIL_UP             | 39  | 192 | 16061 | 2190 | 1.507484 | 0.005275 |
| brown       | 1607  | V\$SRF_C                                     | 36  | 174 | 16079 | 2190 | 1.535475 | 0.005282 |
| turquoise   | 8558  | GSE13411_SWITCHED_MEMORY_BCELL_VS_PLASMA_C   | 67  | 197 | 16056 | 4169 | 1.325898 | 0.005286 |
| turquoise   | 9161  | GSE17974_0H_VS_12H_IN_VITRO_ACT_CD4_TCELL_DN | 67  | 197 | 16056 | 4169 | 1.325898 | 0.005286 |
| brown       | 1585  | V\$SRF_Q6                                    | 38  | 186 | 16067 | 2190 | 1.516213 | 0.005287 |
| brown       | 9072  | GSE17721_POLYIC_VS_GARDIQUIMOD_24H_BMDM_U    | 37  | 180 | 16073 | 2190 | 1.525523 | 0.005289 |
| brown       | 9750  | GSE32423_CTRL_VS_IL4_MEMORY_CD8_TCELL_UP     | 37  | 180 | 16073 | 2190 | 1.525523 | 0.005289 |
| midnightb   | 2758  | KEGG_GLYCOSYLPHOSPHATIDYLINOSITOL_GPI_ANCHOI | 2   | 25  | 16228 | 71   | 18.31324 | 0.00529  |
| midnightb   | 4475  | REACTOME_POST_TRANSLATIONAL_MODIFICATION_SY  | 2   | 25  | 16228 | 71   | 18.31324 | 0.00529  |
| purple      | 2246  | RYTTCCTG_V\$ETS2_B                           | 18  | 960 | 15293 | 157  | 1.941043 | 0.00529  |
| lightgreen  | 4903  | PUIFFE_INVASION_INHIBITED_BY_ASCITES_DN      | 3   | 137 | 16116 | 42   | 8.473931 | 0.00529  |
| turquoise   | 2792  | KEGG_BASAL_TRANSCRIPTION_FACTORS             | 15  | 31  | 16222 | 4169 | 1.886389 | 0.005293 |
| turquoise   | 3128  | chr10q21                                     | 15  | 31  | 16222 | 4169 | 1.886389 | 0.005293 |
| turquoise   | 3307  | chr12p11                                     | 15  | 31  | 16222 | 4169 | 1.886389 | 0.005293 |
| blue        | 9718  | GSE30083_SP2_VS_SP4_THYMOCYTE_UP             | 43  | 161 | 16092 | 2978 | 1.457644 | 0.005298 |
| blue        | 10084 | GSE3982_EFF_MEMORY_CD4_TCELL_VS_NKCELL_UP    | 43  | 161 | 16092 | 2978 | 1.457644 | 0.005298 |
| turquoise   | 1985  | AAGCCAT,MIR-135A,MIR-135B                    | 97  | 300 | 15953 | 4169 | 1.260527 | 0.005299 |
| purple      | 7408  | ZHANG_TLX_TARGETS_60HR_UP                    | 8   | 275 | 15978 | 157  | 3.011558 | 0.005309 |

|             |                                                  |     |      |       |      |          |          |
|-------------|--------------------------------------------------|-----|------|-------|------|----------|----------|
| red         | 8593 GSE13485_DAY7_VS_DAY21_YF17D_VACCINE_PBMC_I | 9   | 101  | 16152 | 524  | 2.763907 | 0.005309 |
| yellow      | 7965 BAKKER_FOXO3_TARGETS_DN                     | 25  | 166  | 16087 | 1426 | 1.716508 | 0.005319 |
| lightcyan   | 8965 GSE17721_PAM3CSK4_VS_CPG_24H_BMDM_DN        | 4   | 184  | 16069 | 62   | 5.698808 | 0.00532  |
| lightcyan   | 9735 GSE31082_DN_VS_CD8_SP_THYMOCYTE_DN          | 4   | 184  | 16069 | 62   | 5.698808 | 0.00532  |
| cyan        | 3659 MODULE_176                                  | 4   | 148  | 16105 | 77   | 5.704809 | 0.005341 |
| yellow      | 1446 ISOMERASE_ACTIVITY                          | 8   | 32   | 16221 | 1426 | 2.849404 | 0.005358 |
| green       | 4867 DAVICIONI_MOLECULAR_ARMS_VS_ERMS_DN         | 22  | 153  | 16100 | 1305 | 1.79083  | 0.005366 |
| turquoise   | 9059 GSE17721_POLYIC_VS_GARDIQUIMOD_1H_BMDM_DN   | 64  | 187  | 16066 | 4169 | 1.334259 | 0.00538  |
| red         | 5261 LANDIS_ERBB2_BREAST_TUMORS_324_UP           | 11  | 139  | 16114 | 524  | 2.454597 | 0.005381 |
| grey60      | 4365 REACTOME_SIGNALING_BY_GPCR                  | 5   | 421  | 15832 | 44   | 4.387011 | 0.005388 |
| red         | 9796 GSE360_CTRL_VS_T_GONDII_DC_UP               | 13  | 179  | 16074 | 524  | 2.252644 | 0.00539  |
| red         | 9851 GSE360_T_GONDII_VS_B_MALAYI_LOW_DOSE_DC_DN  | 13  | 179  | 16074 | 524  | 2.252644 | 0.00539  |
| red         | 10166 GSE7460_CTRL_VS_TGFB_TREATED_ACT_TCONV_UP  | 13  | 179  | 16074 | 524  | 2.252644 | 0.00539  |
| yellow      | 7133 CHUNG_BLISTER_CYTOTOXICITY_UP               | 21  | 132  | 16121 | 1426 | 1.813257 | 0.005392 |
| purple      | 4503 REACTOME_G_ALPHA_Z_SIGNALLING_EVENTS        | 3   | 37   | 16216 | 157  | 8.393699 | 0.005401 |
| purple      | 6470 SESTO_RESPONSE_TO_UV_C6                     | 3   | 37   | 16216 | 157  | 8.393699 | 0.005401 |
| turquoise   | 7820 WHITFIELD_CELL_CYCLE_G1_S                   | 49  | 137  | 16116 | 4169 | 1.394367 | 0.005404 |
| tan         | 10060 GSE3982_BCELL_VS_BASOPHIL_UP               | 6   | 179  | 16074 | 145  | 3.757195 | 0.005408 |
| salmon      | 4519 REACTOME_SYNTHESIS_OF_DNA                   | 4   | 90   | 16163 | 127  | 5.687839 | 0.005414 |
| lightcyan   | 8911 GSE17721_CTRL_VS_GARDIQUIMOD_24H_BMDM_DN    | 4   | 185  | 16068 | 62   | 5.668003 | 0.005422 |
| lightcyan   | 9044 GSE17721_LPS_VS_CPG_4H_BMDM_UP              | 4   | 185  | 16068 | 62   | 5.668003 | 0.005422 |
| magenta     | 561 POSITIVE_REGULATION_OF_T_CELL_PROLIFERATION  | 2   | 11   | 16242 | 167  | 17.69516 | 0.005431 |
| magenta     | 2925 BIOCARTA_BLYMPHOCYTE_PATHWAY                | 2   | 11   | 16242 | 167  | 17.69516 | 0.005431 |
| lightcyan   | 5172 CHOW_RASSF1_TARGETS_DN                      | 2   | 29   | 16224 | 62   | 18.07898 | 0.00544  |
| lightcyan   | 8183 ZWANG_EGF_PERSISTENTLY_UP                   | 2   | 29   | 16224 | 62   | 18.07898 | 0.00544  |
| purple      | 2200 TGTYNNNNRGCARM_UNKNOWN                      | 4   | 73   | 16180 | 157  | 5.672454 | 0.005441 |
| lightyellow | 10071 GSE3982_BCELL_VS_TH2_DN                    | 3   | 177  | 16076 | 33   | 8.347714 | 0.00545  |
| magenta     | 1851 V\$IRF1_Q6                                  | 7   | 206  | 16047 | 167  | 3.307104 | 0.005459 |
| green       | 5908 BENPORATH_PRC2_TARGETS                      | 41  | 339  | 15914 | 1305 | 1.506285 | 0.005466 |
| black       | 3343 chr11q13                                    | 10  | 221  | 16032 | 283  | 2.598692 | 0.005471 |
| brown       | 5386 LASTOWSKA_NEUROBLASTOMA_COPY_NUMBER_DN      | 130 | 781  | 15472 | 2190 | 1.235326 | 0.005471 |
| red         | 9379 GSE22886_NAIVE_CD4_TCELL_VS_DC_DN           | 14  | 200  | 16053 | 524  | 2.171202 | 0.005474 |
| salmon      | 2346 MORF_AATF                                   | 6   | 205  | 16048 | 127  | 3.74565  | 0.005475 |
| magenta     | 7685 ZHAN_MULTIPLE_MYELOMA_MF_DN                 | 3   | 35   | 16218 | 167  | 8.342002 | 0.005479 |
| turquoise   | 2038 GTCTTCC,MIR-7                               | 52  | 147  | 16106 | 4169 | 1.379074 | 0.00548  |
| blue        | 6739 RAMPON_ENRICHED_LEARNING_ENVIRONMENT_LATE   | 9   | 20   | 16233 | 2978 | 2.45596  | 0.005485 |
| black       | 5928 AMIT_EGF_RESPONSE_40_HELA                   | 4   | 41   | 16212 | 283  | 5.603034 | 0.005493 |
| blue        | 2173 CAGCCTC,MIR-485-5P                          | 36  | 130  | 16123 | 2978 | 1.51136  | 0.005493 |
| turquoise   | 3561 MODULE_72                                   | 92  | 283  | 15970 | 4169 | 1.267369 | 0.005499 |
| purple      | 9883 GSE360_T_GONDII_VS_M_TUBERCULOSIS_MAC_DN    | 6   | 166  | 16087 | 157  | 3.74177  | 0.005519 |
| greenyello  | 3596 MODULE_108                                  | 3   | 39   | 16214 | 150  | 8.334872 | 0.005522 |
| lightcyan   | 8817 GSE16522_MEMORY_VS_NAIVE_ANTI_CD3CD28_STIM  | 4   | 186  | 16067 | 62   | 5.63753  | 0.005526 |
| lightcyan   | 9719 GSE30083_SP2_VS_SP4_THYMOCYTE_DN            | 4   | 186  | 16067 | 62   | 5.63753  | 0.005526 |
| midnightb   | 7632 SAKAI_CHRONIC_HEPATITIS_VS_LIVER_CANCER_UP  | 3   | 82   | 16171 | 71   | 8.374957 | 0.005528 |
| turquoise   | 4740 REACTOME_TOLL_RECEPTOR_CASCADES             | 41  | 111  | 16142 | 4169 | 1.44     | 0.005532 |
| salmon      | 4141 REACTOME_METABOLISM_OF_NON_CODING_RNA       | 3   | 46   | 16207 | 127  | 8.346286 | 0.005536 |
| salmon      | 4295 REACTOME_CDK_MEDIATED_PHOSPHORYLATION_AND   | 3   | 46   | 16207 | 127  | 8.346286 | 0.005536 |
| salmon      | 6676 BRACHAT_RESPONSE_TO_CAMPTOTHECIN_DN         | 3   | 46   | 16207 | 127  | 8.346286 | 0.005536 |
| greenyello  | 7704 WONG_ADULT_TISSUE_STEM_MODULE               | 13  | 629  | 15624 | 150  | 2.239417 | 0.005537 |
| turquoise   | 912 PROTEIN_AMINO_ACID_PHOSPHORYLATION           | 83  | 252  | 16001 | 4169 | 1.284042 | 0.005545 |
| blue        | 2719 KEGG_CITRATE_CYCLE_TCA_CYCLE                | 11  | 27   | 16226 | 2978 | 2.223503 | 0.005549 |
| magenta     | 735 CELLULAR_HOMEOSTASIS                         | 5   | 110  | 16143 | 167  | 4.423789 | 0.00555  |
| grey60      | 3530 MODULE_41                                   | 5   | 424  | 15829 | 44   | 4.355971 | 0.005551 |
| blue        | 9330 GSE22886_NAIVE_VS_IGM_MEMORY_BCELL_UP       | 46  | 175  | 16078 | 2978 | 1.434593 | 0.005556 |
| turquoise   | 2113 TTTGCAG,MIR-518A-2                          | 66  | 194  | 16059 | 4169 | 1.326306 | 0.00556  |
| turquoise   | 8866 GSE17721_CTRL_VS_PAM3CSK4_1H_BMDM_UP        | 66  | 194  | 16059 | 4169 | 1.326306 | 0.00556  |
| turquoise   | 8993 GSE17721_LPS_VS_PAM3CSK4_6H_BMDM_DN         | 66  | 194  | 16059 | 4169 | 1.326306 | 0.00556  |
| black       | 9591 GSE27786_CD8_TCELL_VS_NKTCELL_DN            | 9   | 187  | 16066 | 283  | 2.764063 | 0.005566 |
| purple      | 41 INTRINSIC_TO_MEMBRANE                         | 19  | 1041 | 15212 | 157  | 1.889456 | 0.005567 |
| pink        | 7667 HAHTOLA_CTCL_CUTANEOUS                      | 3   | 26   | 16227 | 228  | 8.225202 | 0.005582 |

|             |       |                                               |     |      |       |      |          |          |
|-------------|-------|-----------------------------------------------|-----|------|-------|------|----------|----------|
| turquoise   | 4598  | REACTOME_ASPARAGINE_N_LINKED_GLYCOSYLATION    | 30  | 76   | 16177 | 4169 | 1.538896 | 0.005583 |
| green       | 1447  | GROWTH_FACTOR_ACTIVITY                        | 7   | 28   | 16225 | 1305 | 3.113602 | 0.005587 |
| green       | 4453  | REACTOME_NCAM1_INTERACTIONS                   | 7   | 28   | 16225 | 1305 | 3.113602 | 0.005587 |
| turquoise   | 4906  | THUM_SYSTOLIC_HEART_FAILURE_UP                | 118 | 374  | 15879 | 4169 | 1.23002  | 0.005592 |
| cyan        | 5050  | TONKS_TARGETS_OF_RUNX1_RUNX1T1_FUSION_ERYTI   | 4   | 150  | 16103 | 77   | 5.628745 | 0.005599 |
| cyan        | 8559  | GSE13411_SWITCHED_MEMORY_BCELL_VS_PLASMA_C    | 4   | 150  | 16103 | 77   | 5.628745 | 0.005599 |
| red         | 8189  | ZWANG_TRANSIENTLY_UP_BY_1ST_EGF_PULSE_ONLY    | 65  | 1472 | 14781 | 524  | 1.369644 | 0.005607 |
| brown       | 697   | MACROMOLECULE_LOCALIZATION                    | 43  | 217  | 16036 | 2190 | 1.470612 | 0.00561  |
| green       | 3271  | chr18q12                                      | 8   | 35   | 16218 | 1305 | 2.846721 | 0.005612 |
| green       | 4591  | REACTOME_RNA_POL_I_PROMOTER_OPENING           | 8   | 35   | 16218 | 1305 | 2.846721 | 0.005612 |
| yellow      | 2373  | MORF_DAP3                                     | 28  | 193  | 16060 | 1426 | 1.65354  | 0.005623 |
| yellow      | 9396  | GSE22886_NAIVE_CD4_TCELL_VS_48H_ACT_TH2_UP    | 28  | 193  | 16060 | 1426 | 1.65354  | 0.005623 |
| midnightb   | 9151  | GSE17974_0H_VS_0.5H_IN_VITRO_ACT_CD4_TCELL_DI | 4   | 163  | 16090 | 71   | 5.617558 | 0.005625 |
| lightcyan   | 8723  | GSE14769_UNSTIM_VS_120MIN_LPS_BMDM_DN         | 4   | 187  | 16066 | 62   | 5.607383 | 0.005631 |
| blue        | 2473  | MORF_TNFRSF25                                 | 51  | 198  | 16055 | 2978 | 1.405769 | 0.005634 |
| brown       | 3660  | MODULE_177                                    | 23  | 99   | 16154 | 2190 | 1.724178 | 0.005636 |
| red         | 9783  | GSE339_EX_VIVO_VS_IN_CULTURE_CD8POS_DC_DN     | 13  | 180  | 16073 | 524  | 2.240129 | 0.005644 |
| salmon      | 7139  | GRADE_COLON_AND_RECTAL_CANCER_UP              | 7   | 273  | 15980 | 127  | 3.281446 | 0.005646 |
| turquoise   | 8187  | ZWANG_DOWN_BY_2ND_EGF_PULSE                   | 78  | 235  | 16018 | 4169 | 1.293982 | 0.005655 |
| brown       | 4152  | REACTOME_DEVELOPMENTAL_BIOLOGY                | 60  | 323  | 15930 | 2190 | 1.3786   | 0.005658 |
| turquoise   | 8485  | GSE11924_TFH_VS_TH17_CD4_TCELL_DN             | 63  | 184  | 16069 | 4169 | 1.334825 | 0.005658 |
| turquoise   | 8600  | GSE13493_CD4INTCD8POS_VS_CD8POS_THYMOCYTE_I   | 63  | 184  | 16069 | 4169 | 1.334825 | 0.005658 |
| turquoise   | 9774  | GSE339_CD4POS_VS_CD8POS_DC_IN_CULTURE_UP      | 63  | 184  | 16069 | 4169 | 1.334825 | 0.005658 |
| grey60      | 118   | INTEGRAL_TO_MEMBRANE                          | 8   | 1025 | 15228 | 44   | 2.883016 | 0.005662 |
| red         | 35    | MEMBRANE_BOUND_VESICLE                        | 9   | 102  | 16151 | 524  | 2.73681  | 0.005662 |
| turquoise   | 3179  | chr14q21                                      | 16  | 34   | 16219 | 4169 | 1.834606 | 0.005663 |
| yellow      | 3956  | PID_ATR_PATHWAY                               | 9   | 39   | 16214 | 1426 | 2.630219 | 0.005668 |
| greenyello  | 1747  | CTGCAGY_UNKNOWN                               | 13  | 631  | 15622 | 150  | 2.232319 | 0.005683 |
| blue        | 7846  | KIM_ALL_DISORDERS_OLIGODENDROCYTE_NUMBER_C    | 158 | 717  | 15536 | 2978 | 1.202671 | 0.005691 |
| blue        | 2735  | KEGG_VALINE_LEUCINE_AND_ISOLEUCINE_DEGRADATI  | 15  | 42   | 16211 | 2978 | 1.949175 | 0.005696 |
| lightcyan   | 874   | ION_HOMEOSTASIS                               | 3   | 95   | 16158 | 62   | 8.278268 | 0.005703 |
| tan         | 9486  | GSE26928_NAIVE_VS_EFF_MEMORY_CD4_TCELL_UP     | 6   | 181  | 16072 | 145  | 3.715679 | 0.005703 |
| brown       | 6476  | KAAB_HEART_ATRIUM_VS_VENTRICLE_UP             | 41  | 205  | 16048 | 2190 | 1.484292 | 0.005705 |
| purple      | 6800  | DURCHDEWALD_SKIN_CARCINOGENESIS_UP            | 4   | 74   | 16179 | 157  | 5.5958   | 0.005709 |
| lightyellow | 5126  | GRAHAM_CML_DIVIDING_VS_NORMAL QUIESCENT_U     | 3   | 180  | 16073 | 33   | 8.208586 | 0.00571  |
| lightyellow | 8260  | MEK_UP.V1_UP                                  | 3   | 180  | 16073 | 33   | 8.208586 | 0.00571  |
| pink        | 8160  | ACEVEDO_FGFR1_TARGETS_IN_PROSTATE_CANCER_M    | 9   | 233  | 16020 | 228  | 2.753501 | 0.00572  |
| turquoise   | 2195  | TCCCRNRTGC_UNKNOWN                            | 68  | 201  | 16052 | 4169 | 1.318908 | 0.005726 |
| cyan        | 6240  | BROWN_MYELOID_CELL_DEVELOPMENT_UP             | 4   | 151  | 16102 | 77   | 5.591468 | 0.005731 |
| purple      | 2934  | BIOCARTA_CBL_PATHWAY                          | 2   | 12   | 16241 | 157  | 17.25372 | 0.005743 |
| purple      | 3197  | chr3q24                                       | 2   | 12   | 16241 | 157  | 17.25372 | 0.005743 |
| blue        | 8631  | GSE14308_TH2_VS_TH17_DN                       | 49  | 189  | 16064 | 2978 | 1.414957 | 0.005744 |
| purple      | 4450  | REACTOME_G_ALPHA_Q_SIGNALLING_EVENTS          | 5   | 118  | 16135 | 157  | 4.386538 | 0.005756 |
| purple      | 9193  | GSE17974_IL4_AND_ANTI_IL12_VS_UNTREATED_4H_A  | 5   | 118  | 16135 | 157  | 4.386538 | 0.005756 |
| blue        | 2357  | MORF_BUB1B                                    | 21  | 66   | 16187 | 2978 | 1.736538 | 0.005762 |
| brown       | 9118  | GSE17721_0.5H_VS_8H_PAM3CSK4_BMDM_UP          | 39  | 193  | 16060 | 2190 | 1.499674 | 0.005773 |
| blue        | 3358  | chr1p36                                       | 70  | 287  | 15966 | 2978 | 1.331144 | 0.005773 |
| brown       | 9151  | GSE17974_0H_VS_0.5H_IN_VITRO_ACT_CD4_TCELL_DI | 34  | 163  | 16090 | 2190 | 1.548035 | 0.005777 |
| tan         | 1288  | 3_5_EXONUCLEASE_ACTIVITY                      | 2   | 13   | 16240 | 145  | 17.24456 | 0.005781 |
| turquoise   | 78    | PROTEASOME_COMPLEX                            | 12  | 23   | 16230 | 4169 | 2.034019 | 0.005784 |
| turquoise   | 1258  | PROTEIN_SERINE_THREONINE_PHOSPHATASE_ACTIVIT  | 12  | 23   | 16230 | 4169 | 2.034019 | 0.005784 |
| brown       | 8946  | GSE17721_POLYIC_VS_PAM3CSK4_24H_BMDM_UP       | 38  | 187  | 16066 | 2190 | 1.508104 | 0.005795 |
| brown       | 9522  | GSE2706_2H_VS_8H_R848_STIM_DC_UP              | 38  | 187  | 16066 | 2190 | 1.508104 | 0.005795 |
| lightyellow | 6364  | YAGI_AML_FAB_MARKERS                          | 3   | 181  | 16072 | 33   | 8.163235 | 0.005798 |
| lightyellow | 10076 | GSE3982_BASOPHIL_VS_NKCELL_UP                 | 3   | 181  | 16072 | 33   | 8.163235 | 0.005798 |
| brown       | 10013 | GSE3982_DC_VS_MAC_DN                          | 35  | 169  | 16084 | 2190 | 1.536989 | 0.005799 |
| brown       | 3065  | BIOCARTA_RHO_PATHWAY                          | 10  | 31   | 16222 | 2190 | 2.39402  | 0.005801 |
| brown       | 3967  | PID_AVB3_OPN_PATHWAY                          | 10  | 31   | 16222 | 2190 | 2.39402  | 0.005801 |
| brown       | 3977  | PID_P38ALPHABETAPATHWAY                       | 10  | 31   | 16222 | 2190 | 2.39402  | 0.005801 |
| brown       | 9019  | GSE17721_POLYIC_VS_CPG_24H_BMDM_DN            | 37  | 181  | 16072 | 2190 | 1.517094 | 0.005807 |

|            |                                                    |     |     |       |      |          |          |
|------------|----------------------------------------------------|-----|-----|-------|------|----------|----------|
| brown      | 9456 GSE24634_IL4_VS_CTRL_TREATED_NAIVE_CD4_TCELL_ | 37  | 181 | 16072 | 2190 | 1.517094 | 0.005807 |
| brown      | 9803 GSE360_CTRL_VS_M_TUBERCULOSIS_DC_DN           | 37  | 181 | 16072 | 2190 | 1.517094 | 0.005807 |
| cyan       | 1318 RECEPTOR_SIGNALING_PROTEIN_ACTIVITY           | 3   | 77  | 16176 | 77   | 8.223815 | 0.005816 |
| cyan       | 7276 TOOKER_GEMCITABINE_RESISTANCE_UP              | 3   | 77  | 16176 | 77   | 8.223815 | 0.005816 |
| purple     | 4615 REACTOME_AQUAPORIN_MEDIATED_TRANSPORT         | 3   | 38  | 16215 | 157  | 8.172813 | 0.005823 |
| purple     | 8185 ZWANG_CLASS_2_TRANSIENTLY_INDUCED_BY_EGF      | 3   | 38  | 16215 | 157  | 8.172813 | 0.005823 |
| black      | 8205 RAPA_EARLY_UP.V1_DN                           | 8   | 155 | 16098 | 283  | 2.964186 | 0.005825 |
| green      | 8321 CAHOY_NEURONAL                                | 11  | 58  | 16195 | 1305 | 2.362043 | 0.005834 |
| turquoise  | 4216 REACTOME_DOWNSTREAM_SIGNALING_EVENTS_OF_E     | 35  | 92  | 16161 | 4169 | 1.483139 | 0.005836 |
| lightgreen | 5103 KIM_WT1_TARGETS_12HR_UP                       | 3   | 142 | 16111 | 42   | 8.175553 | 0.005843 |
| lightgreen | 8201 GCNP_SHH_UP_EARLY.V1_DN                       | 3   | 142 | 16111 | 42   | 8.175553 | 0.005843 |
| lightcyan  | 10280 GSE9988_LPS_VS_LPS_AND_ANTI_TREM1_MONOCYTE   | 4   | 189 | 16064 | 62   | 5.548046 | 0.005844 |
| yellow     | 3603 MODULE_115                                    | 7   | 26  | 16227 | 1426 | 3.068589 | 0.005847 |
| turquoise  | 8630 GSE14308_TH2_VS_TH17_UP                       | 65  | 191 | 16062 | 4169 | 1.326727 | 0.005849 |
| turquoise  | 9073 GSE17721_POLYIC_VS_GARDIQUIMOD_24H_BMDM_D     | 65  | 191 | 16062 | 4169 | 1.326727 | 0.005849 |
| salmon     | 4216 REACTOME_DOWNSTREAM_SIGNALING_EVENTS_OF_E     | 4   | 92  | 16161 | 127  | 5.56419  | 0.005851 |
| tan        | 9488 GSE26928_NAIVE_VS_CENT_MEMORY_CD4_TCELL_UP    | 6   | 182 | 16071 | 145  | 3.695263 | 0.005855 |
| green      | 317 GLUTAMATE_SIGNALING_PATHWAY                    | 4   | 10  | 16243 | 1305 | 4.981762 | 0.00586  |
| green      | 7697 DORN_ADENOVIRUS_INFECTION_32HR_UP             | 4   | 10  | 16243 | 1305 | 4.981762 | 0.00586  |
| greenyello | 4947 GRABARCZYK_BCL11B_TARGETS_UP                  | 4   | 78  | 16175 | 150  | 5.556581 | 0.00586  |
| salmon     | 4529 REACTOME_AUTODEGRADATION_OF_THE_E3_UBIQUIT    | 3   | 47  | 16206 | 127  | 8.168705 | 0.005881 |
| salmon     | 5505 SCHLOSSER_MYC_TARGETS_AND_SERUM_RESPONSE_I    | 3   | 47  | 16206 | 127  | 8.168705 | 0.005881 |
| salmon     | 7278 BOHN_PRIMARY_IMMUNODEFICIENCY_SYNDROM_UP      | 3   | 47  | 16206 | 127  | 8.168705 | 0.005881 |
| yellow     | 3145 chr11q                                        | 3   | 5   | 16248 | 1426 | 6.838569 | 0.005887 |
| red        | 7660 GUTIERREZ_CHRONIC_LYMPHOCYTIC_LEUKEMIA_UP     | 3   | 12  | 16241 | 524  | 7.754294 | 0.005898 |
| brown      | 2834 KEGG_TIGHT_JUNCTION                           | 24  | 105 | 16148 | 2190 | 1.696334 | 0.0059   |
| red        | 9080 GSE17721_LPS_VS_GARDIQUIMOD_4H_BMDM_UP        | 13  | 181 | 16072 | 524  | 2.227753 | 0.005908 |
| red        | 9203 GSE17974_IL4_AND_ANTI_IL12_VS_UNTREATED_72H_  | 13  | 181 | 16072 | 524  | 2.227753 | 0.005908 |
| brown      | 941 POSITIVE_REGULATION_OF_CELLULAR_PROCESS        | 100 | 583 | 15670 | 2190 | 1.272978 | 0.005924 |
| brown      | 3050 BIOCARTA_RAC1_PATHWAY                         | 8   | 22  | 16231 | 2190 | 2.698713 | 0.005925 |
| magenta    | 7068 SMID_BREAST_CANCER_BASAL_UP                   | 12  | 504 | 15749 | 167  | 2.317223 | 0.005926 |
| magenta    | 4057 PID_SYNDECAN_1_PATHWAY                        | 3   | 36  | 16217 | 167  | 8.110279 | 0.005932 |
| brown      | 5297 MCBRYAN_PUBERTAL_BREAST_5_6WK_DN              | 28  | 128 | 16125 | 2190 | 1.623445 | 0.005942 |
| purple     | 3499 MODULE_6                                      | 9   | 341 | 15912 | 157  | 2.73226  | 0.005947 |
| turquoise  | 6101 PENG_Glutamine_Deprivation_Up                 | 17  | 37  | 16216 | 4169 | 1.79122  | 0.005948 |
| turquoise  | 7770 KYNG_RESPONSE_TO_H2O2_VIA_ERCC6_UP            | 17  | 37  | 16216 | 4169 | 1.79122  | 0.005948 |
| salmon     | 681 RRNA_PROCESSING                                | 2   | 15  | 16238 | 127  | 17.06352 | 0.005951 |
| salmon     | 700 MICROTUBULE_ORGANIZING_CENTER_ORGANIZATION     | 2   | 15  | 16238 | 127  | 17.06352 | 0.005951 |
| salmon     | 1014 RRNA_METABOLIC_PROCESS                        | 2   | 15  | 16238 | 127  | 17.06352 | 0.005951 |
| lightcyan  | 8544 GSE13306_RA_VS_UNTREATED_MEM_CD4_TCELL_UP     | 4   | 190 | 16063 | 62   | 5.518846 | 0.005953 |
| lightcyan  | 8668 GSE1432_6H_VS_24H_IFNG_MICROGLIA_UP           | 4   | 190 | 16063 | 62   | 5.518846 | 0.005953 |
| lightcyan  | 9420 GSE24142_EARLY_THYMIC_PROGENITOR_VS_DN2_THY   | 4   | 190 | 16063 | 62   | 5.518846 | 0.005953 |
| lightcyan  | 9426 GSE24142_ADULT_VS_FETAL_EARLY_THYMIC_PROGEN   | 4   | 190 | 16063 | 62   | 5.518846 | 0.005953 |
| red        | 4199 REACTOME_BETA_DEFENSINS                       | 2   | 4   | 16249 | 524  | 15.50859 | 0.005962 |
| red        | 7619 WEBER_METHYLATED_ICP_IN_SPERM_DN              | 2   | 4   | 16249 | 524  | 15.50859 | 0.005962 |
| yellow     | 9535 GSE27786_LSK_VS_CD8_TCELL_DN                  | 27  | 185 | 16068 | 1426 | 1.663436 | 0.005967 |
| purple     | 1095 LIPID_BINDING                                 | 4   | 75  | 16178 | 157  | 5.521189 | 0.005987 |
| purple     | 7375 HINATA_NFKB_TARGETS_FIBROBLAST_UP             | 4   | 75  | 16178 | 157  | 5.521189 | 0.005987 |
| purple     | 5115 JAATINEN_HEMATOPOIETIC_STEM_CELL_DN           | 7   | 223 | 16030 | 157  | 3.249579 | 0.005989 |
| blue       | 4579 REACTOME_CHROMOSOME_MAINTENANCE               | 29  | 100 | 16153 | 2978 | 1.58273  | 0.005998 |
| blue       | 10030 GSE3982_MAC_VS_NEUTROPHIL_UP                 | 50  | 194 | 16059 | 2978 | 1.406621 | 0.006002 |
| brown      | 3936 PID_NOTCH_PATHWAY                             | 15  | 56  | 16197 | 2190 | 1.987891 | 0.00601  |
| tan        | 8456 GSE11057_NAIVE_VS_MEMORY_CD4_TCELL_UP         | 6   | 183 | 16070 | 145  | 3.675071 | 0.006011 |
| lightgreen | 4383 REACTOME_CHEMOKINE_RECEPTORS_BIND_CHEMOKI     | 2   | 45  | 16208 | 42   | 17.19894 | 0.006015 |
| magenta    | 293 NERVOUS_SYSTEM_DEVELOPMENT                     | 8   | 264 | 15989 | 167  | 2.949193 | 0.006016 |
| greenyello | 3530 MODULE_41                                     | 10  | 424 | 15829 | 150  | 2.555503 | 0.006021 |
| turquoise  | 8521 GSE12845_NAIVE_VS_DARKZONE_GC_TONSIL_BCELL_I  | 67  | 198 | 16055 | 4169 | 1.319202 | 0.006024 |
| turquoise  | 9251 GSE19825_NAIVE_VS_IL2RAHIGH_DAY3_EFF_CD8_TCEI | 67  | 198 | 16055 | 4169 | 1.319202 | 0.006024 |
| pink       | 5122 GRAHAM_CML_QUIESCENT_VS_NORMAL_DIVIDING_U     | 4   | 52  | 16201 | 228  | 5.483468 | 0.006031 |
| red        | 8282 PTEN_DN.V2_UP                                 | 9   | 103 | 16150 | 524  | 2.710239 | 0.006032 |

|             |       |                                                |    |      |       |      |          |          |
|-------------|-------|------------------------------------------------|----|------|-------|------|----------|----------|
| yellow      | 8993  | GSE17721_LPS_VS_PAM3CSK4_6H_BMDM_DN            | 28 | 194  | 16059 | 1426 | 1.645017 | 0.006037 |
| yellow      | 10221 | GSE8678_IL7R_LOW_VS_HIGH_EFF_CD8_TCELL_DN      | 28 | 194  | 16059 | 1426 | 1.645017 | 0.006037 |
| green       | 8575  | GSE13485_CTRL_VS_DAY1_YF17D_VACCINE_PBMC_DN    | 14 | 83   | 16170 | 1305 | 2.100743 | 0.006043 |
| red         | 5399  | DACOSTA_UV_RESPONSE_VIA_ERCC3_XPCS_DN          | 8  | 85   | 16168 | 524  | 2.919264 | 0.006059 |
| lightcyan   | 8830  | GSE17580_UNINFECTED_VS_S_MANSONI_INF_TREG_U    | 4  | 191  | 16062 | 62   | 5.489951 | 0.006063 |
| lightcyan   | 9060  | GSE17721_POLYIC_VS_GARDIQUIMOD_2H_BMDM_UP      | 4  | 191  | 16062 | 62   | 5.489951 | 0.006063 |
| lightcyan   | 9347  | GSE22886_DAY0_VS_DAY1_MONOCYTE_IN_CULTURE_     | 4  | 191  | 16062 | 62   | 5.489951 | 0.006063 |
| lightcyan   | 9350  | GSE22886_DAY1_VS_DAY7_MONOCYTE_IN_CULTURE_     | 4  | 191  | 16062 | 62   | 5.489951 | 0.006063 |
| lightcyan   | 9721  | GSE30083_SP3_VS_SP4_THYMOCYTE_DN               | 4  | 191  | 16062 | 62   | 5.489951 | 0.006063 |
| lightcyan   | 9739  | GSE31082_DP_VS_CD8_SP_THYMOCYTE_DN             | 4  | 191  | 16062 | 62   | 5.489951 | 0.006063 |
| lightyellow | 9992  | GSE3982_MAST_CELL_VS_DC_UP                     | 3  | 184  | 16069 | 33   | 8.030138 | 0.006068 |
| lightyellow | 8039  | WANG_THOC1_TARGETS_UP                          | 1  | 3    | 16250 | 33   | 164.1717 | 0.006079 |
| green       | 951   | G_PROTEIN_COUPLED_RECEPTOR_PROTEIN_SIGNALING   | 27 | 202  | 16051 | 1305 | 1.664698 | 0.00608  |
| red         | 4957  | BASAKI_YBX1_TARGETS_DN                         | 21 | 357  | 15896 | 524  | 1.82454  | 0.006082 |
| blue        | 2319  | MORF_PCNA                                      | 25 | 83   | 16170 | 2978 | 1.643882 | 0.006099 |
| blue        | 2501  | GCM_BMPR2                                      | 25 | 83   | 16170 | 2978 | 1.643882 | 0.006099 |
| greenyello  | 3588  | MODULE_100                                     | 10 | 425  | 15828 | 150  | 2.54949  | 0.006118 |
| greenyello  | 7061  | SMID_BREAST_CANCER_LUMINAL_B_DN                | 10 | 425  | 15828 | 150  | 2.54949  | 0.006118 |
| purple      | 7714  | MIKKELSEN_ES_ICP_WITH_H3K4ME3                  | 13 | 608  | 15645 | 157  | 2.21347  | 0.006126 |
| greenyello  | 1663  | V\$PAX8_B                                      | 4  | 79   | 16174 | 150  | 5.486245 | 0.006129 |
| turquoise   | 1997  | ACAACTT,MIR-382                                | 26 | 64   | 16189 | 4169 | 1.583781 | 0.006136 |
| brown       | 4030  | PID_AMB2_NEUTROPHILS_PATHWAY                   | 11 | 36   | 16217 | 2190 | 2.267669 | 0.00615  |
| magenta     | 2216  | YATTNATC_UNKNOWN                               | 8  | 265  | 15988 | 167  | 2.938063 | 0.00615  |
| lightyellow | 7062  | SMID_BREAST_CANCER_LUMINAL_A_UP                | 2  | 58   | 16195 | 33   | 16.98328 | 0.006155 |
| lightyellow | 10123 | GSE5463_CTRL_VS_DEXAMETHASONE_TREATED_THYM     | 3  | 185  | 16068 | 33   | 7.986732 | 0.006159 |
| black       | 7983  | KASLER_HDAC7_TARGETS_1_UP                      | 9  | 190  | 16063 | 283  | 2.72042  | 0.006161 |
| greenyello  | 2950  | BIOCARTA_CTL_PATHWAY                           | 2  | 13   | 16240 | 150  | 16.66974 | 0.006174 |
| lightcyan   | 9528  | GSE27786_LSK_VS_LIN_NEG_CELL_UP                | 4  | 192  | 16061 | 62   | 5.461358 | 0.006175 |
| lightcyan   | 9727  | GSE30962_ACUTE_VS_CHRONIC_LCMV_PRIMARY_INF_    | 4  | 192  | 16061 | 62   | 5.461358 | 0.006175 |
| lightcyan   | 9737  | GSE31082_DP_VS_CD4_SP_THYMOCYTE_DN             | 4  | 192  | 16061 | 62   | 5.461358 | 0.006175 |
| lightcyan   | 10104 | GSE39820_CTRL_VS_TGFBETA1_IL6_CD4_TCELL_UP     | 4  | 192  | 16061 | 62   | 5.461358 | 0.006175 |
| lightcyan   | 10106 | GSE39820_CTRL_VS_TGFBETA1_IL6_IL23A_CD4_TCELL_ | 4  | 192  | 16061 | 62   | 5.461358 | 0.006175 |
| purple      | 3605  | MODULE_117                                     | 11 | 472  | 15781 | 157  | 2.412596 | 0.00618  |
| red         | 8115  | PHONG_TNF_RESPONSE_NOT_VIA_P38                 | 19 | 312  | 15941 | 524  | 1.888866 | 0.00618  |
| red         | 7658  | CAIRO_LIVER_DEVELOPMENT_DN                     | 13 | 182  | 16071 | 524  | 2.215513 | 0.006182 |
| red         | 8565  | GSE13484_UNSTIM_VS_12H_YF17D_VACCINE_STIM_PI   | 13 | 182  | 16071 | 524  | 2.215513 | 0.006182 |
| brown       | 573   | MYELOID_LEUKOCYTE_DIFFERENTIATION              | 5  | 10   | 16243 | 2190 | 3.710731 | 0.006182 |
| brown       | 3021  | BIOCARTA_MONOCYTE_PATHWAY                      | 5  | 10   | 16243 | 2190 | 3.710731 | 0.006182 |
| brown       | 4149  | REACTOME_COPI_MEDIATED_TRANSPORT               | 5  | 10   | 16243 | 2190 | 3.710731 | 0.006182 |
| brown       | 4799  | WINTER_HYPOXIA_UP                              | 20 | 83   | 16170 | 2190 | 1.788304 | 0.006188 |
| brown       | 7808  | SASSON_RESPONSE_TO_FORSKOLIN_UP                | 20 | 83   | 16170 | 2190 | 1.788304 | 0.006188 |
| brown       | 4511  | REACTOME_GOLGI_ASSOCIATED_VESICLE_BIOGENESIS   | 14 | 51   | 16202 | 2190 | 2.037264 | 0.006193 |
| cyan        | 5529  | PATTERSON_DOCETAXEL_RESISTANCE                 | 2  | 25   | 16228 | 77   | 16.88623 | 0.006193 |
| cyan        | 6565  | BRACHAT_RESPONSE_TO_METHOTREXATE_UP            | 2  | 25   | 16228 | 77   | 16.88623 | 0.006193 |
| cyan        | 6604  | ZHANG_ANTIVIRAL_RESPONSE_TO_RIBAVIRIN_UP       | 2  | 25   | 16228 | 77   | 16.88623 | 0.006193 |
| lightcyan   | 6363  | APPEL_IMATINIB_RESPONSE                        | 2  | 31   | 16222 | 62   | 16.91259 | 0.0062   |
| greenyello  | 826   | RESPONSE_TO_EXTERNAL_STIMULUS                  | 7  | 235  | 16018 | 150  | 3.227546 | 0.006203 |
| grey60      | 41    | INTRINSIC_TO_MEMBRANE                          | 8  | 1041 | 15212 | 44   | 2.838704 | 0.006207 |
| brown       | 928   | REGULATION_OF_RNA_METABOLIC_PROCESS            | 74 | 414  | 15839 | 2190 | 1.326541 | 0.00621  |
| green       | 108   | EXTRACELLULAR_REGION_PART                      | 28 | 212  | 16041 | 1305 | 1.644922 | 0.006217 |
| green       | 1457  | V\$MYOD_01                                     | 28 | 212  | 16041 | 1305 | 1.644922 | 0.006217 |
| greenyello  | 3625  | MODULE_137                                     | 10 | 426  | 15827 | 150  | 2.543505 | 0.006217 |
| salmon      | 4250  | REACTOME_P53_INDEPENDENT_G1_S_DNA_DAMAGE_      | 3  | 48   | 16205 | 127  | 7.998524 | 0.006237 |
| salmon      | 6307  | PARK_HSC_AND_MULTIPOTENT_PROGENITORS           | 3  | 48   | 16205 | 127  | 7.998524 | 0.006237 |
| turquoise   | 4217  | REACTOME_ACTIVATION_OF_NF_KAPPAB_IN_B_CELLS    | 25 | 61   | 16192 | 4169 | 1.597761 | 0.006243 |
| pink        | 367   | BIOSYNTHETIC_PROCESS                           | 13 | 418  | 15835 | 228  | 2.217    | 0.006252 |
| blue        | 9324  | GSE22886_CD8_TCELL_VS_BCELL_NAIVE_UP           | 51 | 199  | 16054 | 2978 | 1.398704 | 0.006257 |
| purple      | 2761  | KEGG_ARACHIDONIC_ACID_METABOLISM               | 3  | 39   | 16214 | 157  | 7.963253 | 0.006264 |
| purple      | 3596  | MODULE_108                                     | 3  | 39   | 16214 | 157  | 7.963253 | 0.006264 |
| purple      | 4351  | REACTOME_PHASE1_FUNCTIONALIZATION_OF_COMPC     | 3  | 39   | 16214 | 157  | 7.963253 | 0.006264 |

|            |                                                    |     |      |       |      |          |          |
|------------|----------------------------------------------------|-----|------|-------|------|----------|----------|
| turquoise  | 550 LIPID_BIOSYNTHETIC_PROCESS                     | 33  | 86   | 16167 | 4169 | 1.49595  | 0.006275 |
| turquoise  | 4820 WATANABE_RECTAL_CANCER_RADIO_THERAPY_RESPON   | 33  | 86   | 16167 | 4169 | 1.49595  | 0.006275 |
| green      | 23 EXTRACELLULAR_MATRIX_PART                       | 9   | 43   | 16210 | 1305 | 2.606736 | 0.006276 |
| lightgreen | 7735 YAO_TEMPORAL_RESPONSE_TO_PROGESTERONE_CLU'    | 2   | 46   | 16207 | 42   | 16.82505 | 0.006279 |
| black      | 8285 ESC_J1_UP_EARLY.V1_DN                         | 8   | 157  | 16096 | 283  | 2.926425 | 0.006281 |
| turquoise  | 4988 OSWALD_HEMATOPOIETIC_STEM_CELL_IN_COLLAGEN    | 85  | 260  | 15993 | 4169 | 1.274522 | 0.006283 |
| lightcyan  | 8256 CAMP_UP.V1_UP                                 | 4   | 193  | 16060 | 62   | 5.43306  | 0.006288 |
| blue       | 2591 GNF2_HDAC1                                    | 31  | 109  | 16144 | 2978 | 1.552187 | 0.006288 |
| blue       | 9821 GSE360_DC_VS_MAC_L_MAJOR_DN                   | 44  | 167  | 16086 | 2978 | 1.437954 | 0.006291 |
| brown      | 3952 PID_ER_NONGENOMIC_PATHWAY                     | 12  | 41   | 16212 | 2190 | 2.172135 | 0.006299 |
| turquoise  | 638 PROTEIN_MODIFICATION_BY_SMALL_PROTEIN_CONJU    | 19  | 43   | 16210 | 4169 | 1.722609 | 0.006302 |
| turquoise  | 1995 TCTGATC,MIR-383                               | 19  | 43   | 16210 | 4169 | 1.722609 | 0.006302 |
| lightgreen | 9496 GSE26928_CENTR_MEMORY_VS_CXCR5_POS_CD4_TCE    | 3   | 146  | 16107 | 42   | 7.951566 | 0.00631  |
| brown      | 8995 GSE17721_LPS_VS_PAM3CSK4_8H_BMDM_DN           | 39  | 194  | 16059 | 2190 | 1.491943 | 0.00631  |
| brown      | 9331 GSE22886_NAIVE_VS_IGM_MEMORY_BCELL_DN         | 39  | 194  | 16059 | 2190 | 1.491943 | 0.00631  |
| brown      | 9441 GSE24634_TREG_VS_TCONV_POST_DAY3_IL4_CONVER   | 39  | 194  | 16059 | 2190 | 1.491943 | 0.00631  |
| brown      | 9567 GSE27786_BCELL_VS_NKCELL_DN                   | 39  | 194  | 16059 | 2190 | 1.491943 | 0.00631  |
| brown      | 9856 GSE360_HIGH_DOSE_B_MALAYI_VS_M_TUBERCULOSIS   | 39  | 194  | 16059 | 2190 | 1.491943 | 0.00631  |
| grey60     | 8188 ZWANG_TRANSIENTLY_UP_BY_2ND_EGF_PULSE_ONLY    | 8   | 1044 | 15209 | 44   | 2.830547 | 0.006314 |
| turquoise  | 4157 REACTOME_TCA_CYCLE_AND_RESPIRATORY_ELECTROM   | 42  | 115  | 16138 | 4169 | 1.423813 | 0.006316 |
| turquoise  | 5155 HAHTOLA_MYCOSIS_FUNGOIDES_CD4_DN              | 42  | 115  | 16138 | 4169 | 1.423813 | 0.006316 |
| red        | 6581 LIAN_LIPA_TARGETS_3M                          | 6   | 52   | 16201 | 524  | 3.578905 | 0.006322 |
| tan        | 9952 GSE3982_CTRL_VS_LPS_4H_MAC_UP                 | 6   | 185  | 16068 | 145  | 3.63534  | 0.00633  |
| turquoise  | 4100 PID_P53REGULATIONPATHWAY                      | 24  | 58   | 16195 | 4169 | 1.613188 | 0.00633  |
| turquoise  | 7853 KIM_ALL_DISORDERS_DURATION_CORR_DN            | 49  | 138  | 16115 | 4169 | 1.384263 | 0.006332 |
| brown      | 3523 MODULE_33                                     | 58  | 312  | 15941 | 2190 | 1.379631 | 0.006333 |
| brown      | 8115 PHONG_TNF_RESPONSE_NOT_VIA_P38                | 58  | 312  | 15941 | 2190 | 1.379631 | 0.006333 |
| blue       | 6181 SCHUHMACHER_MYC_TARGETS_UP                    | 24  | 79   | 16174 | 2978 | 1.658032 | 0.006334 |
| turquoise  | 605 RNA_PROCESSING                                 | 58  | 168  | 16085 | 4169 | 1.345923 | 0.006336 |
| turquoise  | 8886 GSE17721_CTRL_VS_CPG_4H_BMDM_UP               | 66  | 195  | 16058 | 4169 | 1.319505 | 0.006338 |
| salmon     | 5141 DODD_NASOPHARYNGEAL_CARCINOMA_DN              | 19  | 1311 | 14942 | 127  | 1.85473  | 0.006355 |
| salmon     | 7255 MOOTHA_MITOCHONDRIA                           | 9   | 427  | 15826 | 127  | 2.697394 | 0.006356 |
| purple     | 2817 KEGG_ENDOCYTOSIS                              | 6   | 171  | 16082 | 157  | 3.632361 | 0.006359 |
| purple     | 4368 REACTOME_CLASS_A1_RHODOPSIN_LIKE_RECEPTORS    | 6   | 171  | 16082 | 157  | 3.632361 | 0.006359 |
| purple     | 5093 SABATES_COLORECTAL_ADENOMA_DN                 | 6   | 171  | 16082 | 157  | 3.632361 | 0.006359 |
| brown      | 9812 GSE360_CTRL_VS_B_MALAYI_LOW_DOSE_MAC_UP       | 37  | 182  | 16071 | 2190 | 1.508759 | 0.006366 |
| brown      | 7214 BLUM_RESPONSE_TO_SALIRASIB_UP                 | 46  | 237  | 16016 | 2190 | 1.440452 | 0.00637  |
| brown      | 10215 GSE8515_CTRL_VS_IL1_4H_STIM_MAC_DN           | 36  | 176  | 16077 | 2190 | 1.518026 | 0.006379 |
| midnightb  | 10092 GSE3982_CENT_MEMORY_CD4_TCELL_VS_TH1_UP      | 4   | 169  | 16084 | 71   | 5.418118 | 0.006383 |
| turquoise  | 1007 STRESS_ACTIVATED_PROTEIN_KINASE_SIGNALING_PAT | 20  | 46   | 16207 | 4169 | 1.695016 | 0.00639  |
| turquoise  | 4295 REACTOME_CDK_MEDIATED_PHOSPHORYLATION_AND     | 20  | 46   | 16207 | 4169 | 1.695016 | 0.00639  |
| turquoise  | 2295 MORF_BAG5                                     | 23  | 55   | 16198 | 4169 | 1.630297 | 0.006394 |
| blue       | 8691 GSE1460_INTRATHYMIC_T_PROGENITOR_VS_NAIVE_CI  | 49  | 190  | 16063 | 2978 | 1.407509 | 0.006394 |
| lightcyan  | 7144 BOQUEST_STEM_CELL_DN                          | 4   | 194  | 16059 | 62   | 5.405055 | 0.006402 |
| lightcyan  | 9463 GSE24634_IL4_VS_CTRL_TREATED_NAIVE_CD4_TCELL_ | 4   | 194  | 16059 | 62   | 5.405055 | 0.006402 |
| magenta    | 731 HOMEOSTATIC_PROCESS                            | 6   | 161  | 16092 | 167  | 3.626957 | 0.006404 |
| greenyello | 2412 MORF_LCAT                                     | 4   | 80   | 16173 | 150  | 5.417667 | 0.006407 |
| magenta    | 6509 MCCLUNG_DELTA_FOSB_TARGETS_2WK                | 3   | 37   | 16216 | 167  | 7.891083 | 0.006408 |
| grey60     | 7838 MARTENS_BOUND_BY_PML_RARA_FUSION              | 5   | 439  | 15814 | 44   | 4.207134 | 0.006415 |
| brown      | 1747 CTGCAGY_UNKNOWN                               | 107 | 631  | 15622 | 2190 | 1.258473 | 0.006421 |
| red        | 95 CYTOPLASMIC_VESICLE                             | 9   | 104  | 16149 | 524  | 2.684179 | 0.006421 |
| magenta    | 6968 WALLACE_PROSTATE_CANCER_RACE_UP               | 8   | 267  | 15986 | 167  | 2.916056 | 0.006426 |
| turquoise  | 1434 UBIQUITIN_PROTEIN_LIGASE_ACTIVITY             | 21  | 49   | 16204 | 4169 | 1.670801 | 0.00643  |
| turquoise  | 4783 REACTOME_VIF_MEDIATED_DEGRADATION_OF_APOBI    | 21  | 49   | 16204 | 4169 | 1.670801 | 0.00643  |
| turquoise  | 6941 WONG_PROTEASOME_GENE_MODULE                   | 21  | 49   | 16204 | 4169 | 1.670801 | 0.00643  |
| turquoise  | 7562 YOSHIOKA_LIVER_CANCER_EARLY_RECURRENCE_DN     | 21  | 49   | 16204 | 4169 | 1.670801 | 0.00643  |
| lightgreen | 9384 GSE22886_TH1_VS_TH2_48H_ACT_UP                | 3   | 147  | 16106 | 42   | 7.897473 | 0.00643  |
| yellow     | 2309 MORF_GPX4                                     | 11  | 54   | 16199 | 1426 | 2.321737 | 0.006441 |
| magenta    | 9519 GSE2706_LPS_VS_R848_AND_LPS_2H_STIM_DC_DN     | 5   | 114  | 16139 | 167  | 4.268568 | 0.006443 |
| brown      | 5744 PUJANA_ATM_PCC_NETWORK                        | 208 | 1317 | 14936 | 2190 | 1.172106 | 0.006456 |

|             |                                                    |     |      |       |      |          |          |
|-------------|----------------------------------------------------|-----|------|-------|------|----------|----------|
| purple      | 5905 BENPORATH_SUZ12_TARGETS                       | 13  | 612  | 15641 | 157  | 2.199003 | 0.006461 |
| red         | 5045 TONKS_TARGETS_OF_RUNX1_RUNX1T1_FUSION_HSC_    | 13  | 183  | 16070 | 524  | 2.203406 | 0.006465 |
| red         | 8624 GSE14000_4H_VS_16H_LPS_DC_UP                  | 13  | 183  | 16070 | 524  | 2.203406 | 0.006465 |
| red         | 9229 GSE18791_CTRL_VS_NEWCASTLE_VIRUS_DC_10H_DN    | 13  | 183  | 16070 | 524  | 2.203406 | 0.006465 |
| turquoise   | 9619 GSE28237_FOLLICULAR_VS_EARLY_GC_BCELL_DN      | 63  | 185  | 16068 | 4169 | 1.32761  | 0.006472 |
| magenta     | 7022 MASRI_RESISTANCE_TO_TAMOXIFEN_AND_AROMATAI    | 2   | 12   | 16241 | 167  | 16.22056 | 0.006474 |
| magenta     | 7637 LOPEZ_MESOTHELIOMA_SURVIVAL_DN                | 2   | 12   | 16241 | 167  | 16.22056 | 0.006474 |
| magenta     | 7660 GUTIERREZ_CHRONIC_LYMPHOCYTIC_LEUKEMIA_UP     | 2   | 12   | 16241 | 167  | 16.22056 | 0.006474 |
| yellow      | 9895 GSE36392_TYPE_2_MYELOID_VS_NEUTROPHIL_IL25_TI | 28  | 195  | 16058 | 1426 | 1.636581 | 0.006476 |
| tan         | 9762 GSE3337_CTRL_VS_16H_IFNG_IN_CD8POS_DC_UP      | 6   | 186  | 16067 | 145  | 3.615795 | 0.006494 |
| brown       | 5501 SCHLOSSER_SERUM_RESPONSE_UP                   | 27  | 123  | 16130 | 2190 | 1.629101 | 0.006497 |
| turquoise   | 2034 GAGACTG,MIR-452                               | 32  | 83   | 16170 | 4169 | 1.50305  | 0.006497 |
| turquoise   | 6620 GENTILE_UV_HIGH_DOSE_DN                       | 95  | 295  | 15958 | 4169 | 1.255461 | 0.006501 |
| blue        | 6537 BLALOCK_ALZHEIMERS_DISEASE_UP                 | 318 | 1535 | 14718 | 2978 | 1.130648 | 0.006507 |
| midnightb   | 8533 GSE13306_TREG_VS_TCONV_LAMINA_PROPRIA_DN      | 4   | 170  | 16083 | 71   | 5.386247 | 0.006515 |
| midnightb   | 10094 GSE3982_CENT_MEMORY_CD4_TCELL_VS_TH2_UP      | 4   | 170  | 16083 | 71   | 5.386247 | 0.006515 |
| lightcyan   | 6921 KONDO_EZH2_TARGETS                            | 4   | 195  | 16058 | 62   | 5.377337 | 0.006518 |
| lightcyan   | 9551 GSE27786_LIN_NEG_VS_CD8_TCELL_DN              | 4   | 195  | 16058 | 62   | 5.377337 | 0.006518 |
| lightcyan   | 10052 GSE3982_NEUTROPHIL_VS_CENT_MEMORY_CD4_TCEL   | 4   | 195  | 16058 | 62   | 5.377337 | 0.006518 |
| grey60      | 2809 KEGG_NEUROACTIVE_LIGAND_RECEPTOR_INTERACTIO   | 3   | 141  | 16112 | 44   | 7.859284 | 0.006528 |
| grey60      | 7523 CHIANG_LIVER_CANCER_SUBCLASS_CTNNB1_DN        | 3   | 141  | 16112 | 44   | 7.859284 | 0.006528 |
| brown       | 1374 OXIDOREDUCTASE_ACTIVITY_ACTING_ON_THE_ALDEH'  | 7   | 18   | 16235 | 2190 | 2.886124 | 0.006534 |
| brown       | 3330 chr10p14                                      | 7   | 18   | 16235 | 2190 | 2.886124 | 0.006534 |
| brown       | 4604 REACTOME_REGULATION_OF_SIGNALING_BY_CBL       | 7   | 18   | 16235 | 2190 | 2.886124 | 0.006534 |
| brown       | 6440 MARCHINI TRABECTEDIN_RESISTANCE_UP            | 7   | 18   | 16235 | 2190 | 2.886124 | 0.006534 |
| purple      | 6082 BYSTRYKH_HEMATOPOIESIS_STEM_CELL_AND_BRAIN_   | 6   | 172  | 16081 | 157  | 3.611243 | 0.006537 |
| purple      | 8077 PLASARI_TGFB1_TARGETS_10HR_UP                 | 6   | 172  | 16081 | 157  | 3.611243 | 0.006537 |
| yellow      | 1252 METHYLTRANSFERASE_ACTIVITY                    | 8   | 33   | 16220 | 1426 | 2.763058 | 0.006539 |
| yellow      | 2798 KEGG_BASE_EXCISION_REPAIR                     | 8   | 33   | 16220 | 1426 | 2.763058 | 0.006539 |
| pink        | 8374 KRAS.LUNG_UP.V1_DN                            | 5   | 84   | 16169 | 228  | 4.24316  | 0.006541 |
| purple      | 3519 MODULE_27                                     | 8   | 285  | 15968 | 157  | 2.905889 | 0.006544 |
| lightgreen  | 7142 GRADE_COLON_VS_RECTAL_CANCER_DN               | 2   | 47   | 16206 | 42   | 16.46707 | 0.006547 |
| salmon      | 197 CHROMOSOMAL_PART                               | 4   | 95   | 16158 | 127  | 5.388479 | 0.006548 |
| lightgreen  | 10067 GSE3982_BCELL_VS_NKCELL_DN                   | 3   | 148  | 16105 | 42   | 7.844112 | 0.006551 |
| cyan        | 8285 ESC_J1_UP_EARLY.V1_DN                         | 4   | 157  | 16096 | 77   | 5.377781 | 0.006567 |
| purple      | 7715 MIKKELSEN_ES_ICP_WITH_H3K4ME3_AND_H3K27ME3    | 4   | 77   | 16176 | 157  | 5.377781 | 0.006567 |
| lightyellow | 1151 LYASE_ACTIVITY                                | 2   | 60   | 16193 | 33   | 16.41717 | 0.006574 |
| lightyellow | 5224 VANHARANTA_UTERINE_FIBROID_DN                 | 2   | 60   | 16193 | 33   | 16.41717 | 0.006574 |
| turquoise   | 114 EARLY_ENDOSOME                                 | 10  | 18   | 16235 | 4169 | 2.165854 | 0.006574 |
| turquoise   | 4298 REACTOME_ENOS_ACTIVATION_AND_REGULATION       | 10  | 18   | 16235 | 4169 | 2.165854 | 0.006574 |
| turquoise   | 6624 KANG_DOXORUBICIN_RESISTANCE_DN                | 10  | 18   | 16235 | 4169 | 2.165854 | 0.006574 |
| turquoise   | 9195 GSE17974_IL4_AND_ANTI_IL12_VS_UNTREATED_6H_A  | 60  | 175  | 16078 | 4169 | 1.336641 | 0.006582 |
| black       | 8821 GSE16522_ANTI_CD3CD28_STIM_VS_UNSTIM_NAIVE_I  | 9   | 192  | 16061 | 283  | 2.692083 | 0.006585 |
| turquoise   | 6822 CREIGHTON_ENDOCRINE_THERAPY_RESISTANCE_5      | 135 | 436  | 15817 | 4169 | 1.207116 | 0.006597 |
| lightcyan   | 6462 CHEN_LVAD_SUPPORT_OF_FAILING_HEART_DN         | 2   | 32   | 16221 | 62   | 16.38407 | 0.006597 |
| salmon      | 4783 REACTOME_VIF_MEDIATED_DEGRADATION_OF_APOBI    | 3   | 49   | 16204 | 127  | 7.835288 | 0.006607 |
| pink        | 4917 CASORELLI_APL_SECONDARY_VS_DE_NOVO_DN         | 2   | 9    | 16244 | 228  | 15.84113 | 0.00661  |
| pink        | 5696 SHANK_TAL1_TARGETS_DN                         | 2   | 9    | 16244 | 228  | 15.84113 | 0.00661  |
| pink        | 5816 SCIAN_INVERSED_TARGETS_OF_TP53_AND_TP73_UP    | 2   | 9    | 16244 | 228  | 15.84113 | 0.00661  |
| blue        | 9104 GSE17721_0.5H_VS_4H_POLYIC_BMDM_UP            | 45  | 172  | 16081 | 2978 | 1.427884 | 0.006617 |
| blue        | 2502 GCM_CALM1                                     | 30  | 105  | 16148 | 2978 | 1.55934  | 0.006625 |
| lightcyan   | 3161 chr12q24                                      | 4   | 196  | 16057 | 62   | 5.349901 | 0.006635 |
| blue        | 8517 GSE12845_IGD_NEG_BLOOD_VS_DARKZONE_GC_TONSI   | 50  | 195  | 16058 | 2978 | 1.399408 | 0.006667 |
| blue        | 8639 GSE14308_TH1_VS_TH17_DN                       | 50  | 195  | 16058 | 2978 | 1.399408 | 0.006667 |
| turquoise   | 9153 GSE17974_0H_VS_1H_IN_VITRO_ACT_CD4_TCELL_DN   | 65  | 192  | 16061 | 4169 | 1.319817 | 0.006668 |
| turquoise   | 3886 MODULE_495                                    | 8   | 13   | 16240 | 4169 | 2.3991   | 0.006669 |
| cyan        | 5398 DACOSTA_UV_RESPONSE_VIA_ERCC3_XPCS_UP         | 2   | 26   | 16227 | 77   | 16.23676 | 0.006689 |
| yellow      | 2648 GNF2_HMMR                                     | 10  | 47   | 16206 | 1426 | 2.425025 | 0.006699 |
| tan         | 1115 DRUG_BINDING                                  | 2   | 14   | 16239 | 145  | 16.01281 | 0.006705 |
| tan         | 3767 MODULE_313                                    | 2   | 14   | 16239 | 145  | 16.01281 | 0.006705 |



|             |      |                                              |     |      |       |      |          |          |
|-------------|------|----------------------------------------------|-----|------|-------|------|----------|----------|
| tan         | 5499 | GRASEMANN_RETINOBLASTOMA_WITH_6P_AMPLIFIC/   | 2   | 14   | 16239 | 145  | 16.01281 | 0.006705 |
| tan         | 5672 | INAMURA_LUNG_CANCER_SCC_SUBTYPES_UP          | 2   | 14   | 16239 | 145  | 16.01281 | 0.006705 |
| tan         | 6850 | LEIN_LOCALIZED_TO_DISTAL_AND_PROXIMAL_DENDRI | 2   | 14   | 16239 | 145  | 16.01281 | 0.006705 |
| blue        | 761  | ADAPTIVE_IMMUNE_RESPONSE                     | 10  | 24   | 16229 | 2978 | 2.274037 | 0.00671  |
| red         | 598  | RESPONSE_TO_STRESS                           | 25  | 454  | 15799 | 524  | 1.707994 | 0.006711 |
| greenyello  | 2105 | TGCCTTA,MIR-124A                             | 11  | 500  | 15753 | 150  | 2.383773 | 0.006712 |
| salmon      | 6940 | WONG_MITOCHONDRIA_GENE_MODULE                | 6   | 214  | 16039 | 127  | 3.588123 | 0.006717 |
| purple      | 8259 | MEK_UP.V1_DN                                 | 6   | 173  | 16080 | 157  | 3.590369 | 0.006719 |
| purple      | 8837 | GSE17721_CTRL_VS_LPS_2H_BMDM_DN              | 6   | 173  | 16080 | 157  | 3.590369 | 0.006719 |
| turquoise   | 7409 | ZHANG_TLX_TARGETS_60HR_DN                    | 88  | 271  | 15982 | 4169 | 1.265946 | 0.006724 |
| purple      | 2889 | KEGG_BLADDER_CANCER                          | 3   | 40   | 16213 | 157  | 7.764172 | 0.006725 |
| purple      | 3175 | chr11q24                                     | 3   | 40   | 16213 | 157  | 7.764172 | 0.006725 |
| purple      | 5652 | JOHANSSON_BRAIN_CANCER_EARLY_VS_LATE_DN      | 3   | 40   | 16213 | 157  | 7.764172 | 0.006725 |
| purple      | 5664 | LI_WILMS_TUMOR_VS_FETAL_KIDNEY_2_DN          | 3   | 40   | 16213 | 157  | 7.764172 | 0.006725 |
| blue        | 2592 | GNF2_TDG                                     | 13  | 35   | 16218 | 2978 | 2.027142 | 0.006729 |
| blue        | 7995 | BILANGES_SERUM_SENSITIVE_VIA_TSC2            | 13  | 35   | 16218 | 2978 | 2.027142 | 0.006729 |
| purple      | 738  | ICOSANOID_METABOLIC_PROCESS                  | 2   | 13   | 16240 | 157  | 15.92651 | 0.006744 |
| purple      | 3837 | MODULE_412                                   | 2   | 13   | 16240 | 157  | 15.92651 | 0.006744 |
| purple      | 5331 | NUNODA_RESPONSE_TO_DASATINIB_IMATINIB_DN     | 2   | 13   | 16240 | 157  | 15.92651 | 0.006744 |
| purple      | 5368 | WONG_ENDMETRIUM_CANCER_UP                    | 2   | 13   | 16240 | 157  | 15.92651 | 0.006744 |
| magenta     | 1970 | TCTATGA,MIR-376A,MIR-376B                    | 4   | 73   | 16180 | 167  | 5.332786 | 0.006752 |
| red         | 6964 | MASSARWEH_TAMOXIFEN_RESISTANCE_DN            | 14  | 205  | 16048 | 524  | 2.118246 | 0.006769 |
| yellow      | 2603 | GNF2_RRM2                                    | 9   | 40   | 16213 | 1426 | 2.564464 | 0.00677  |
| brown       | 252  | REGULATION_OF_RHO_PROTEIN_SIGNAL_TRANSDUCTI  | 6   | 14   | 16239 | 2190 | 3.180626 | 0.006779 |
| brown       | 1408 | OXIDOREDUCTASE_ACTIVITY_ACTING_ON_THE_ALDEH' | 6   | 14   | 16239 | 2190 | 3.180626 | 0.006779 |
| brown       | 3080 | BIOCARTA_BARRESTIN_SRC_PATHWAY               | 6   | 14   | 16239 | 2190 | 3.180626 | 0.006779 |
| lightyellow | 2901 | KEGG_ARRHYTHMOGENIC_RIGHT_VENTRICULAR_CARD   | 2   | 61   | 16192 | 33   | 16.14804 | 0.006789 |
| magenta     | 9265 | GSE20366_EX_VIVO_VS_HOMEOSTATIC_CONVERSION_  | 6   | 163  | 16090 | 167  | 3.582455 | 0.006791 |
| red         | 6510 | CUI_TCF21_TARGETS_DN                         | 4   | 24   | 16229 | 524  | 5.169529 | 0.006795 |
| greenyello  | 246  | RESPONSE_TO_VIRUS                            | 3   | 42   | 16211 | 150  | 7.739524 | 0.006798 |
| greenyello  | 6356 | ZHAN_MULTIPLE_MYELOMA_HP_UP                  | 3   | 42   | 16211 | 150  | 7.739524 | 0.006798 |
| yellow      | 9156 | GSE17974_0H_VS_4H_IN_VITRO_ACT_CD4_TCELL_UP  | 26  | 178  | 16075 | 1426 | 1.66482  | 0.006806 |
| turquoise   | 2102 | AAGCAAT,MIR-137                              | 62  | 182  | 16071 | 4169 | 1.328073 | 0.006808 |
| lightgreen  | 6627 | BURTON_ADIPOGENESIS_PEAK_AT_2HR              | 2   | 48   | 16205 | 42   | 16.12401 | 0.00682  |
| lightgreen  | 7282 | VILIMAS_NOTCH1_TARGETS_UP                    | 2   | 48   | 16205 | 42   | 16.12401 | 0.00682  |
| green       | 4849 | KOBAYASHI_EGFR_SIGNALING_6HR_DN              | 5   | 16   | 16237 | 1305 | 3.892002 | 0.006831 |
| green       | 6544 | INGA_TP53_TARGETS                            | 5   | 16   | 16237 | 1305 | 3.892002 | 0.006831 |
| brown       | 6384 | BRUNO_HEMATOPOIESIS                          | 16  | 62   | 16191 | 2190 | 1.915216 | 0.006832 |
| brown       | 4146 | REACTOME_SIGNALLING_BY_NGF                   | 40  | 201  | 16052 | 2190 | 1.476908 | 0.006833 |
| brown       | 2445 | MORF_PRKAR1A                                 | 30  | 141  | 16112 | 2190 | 1.579034 | 0.006843 |
| magenta     | 459  | DEFENSE_RESPONSE                             | 7   | 215  | 16038 | 167  | 3.168667 | 0.006854 |
| red         | 4731 | REACTOME_IMMUNE_SYSTEM                       | 39  | 801  | 15452 | 524  | 1.5102   | 0.006865 |
| brown       | 5143 | RODRIGUES_THYROID_CARCINOMA_POORLY_DIFFEREI  | 124 | 746  | 15507 | 2190 | 1.233594 | 0.006869 |
| purple      | 1680 | V\$EN1_01                                    | 4   | 78   | 16175 | 157  | 5.308836 | 0.006871 |
| purple      | 2101 | CTCCAAG,MIR-432                              | 4   | 78   | 16175 | 157  | 5.308836 | 0.006871 |
| purple      | 2844 | KEGG_HEMATOPOIETIC_CELL_LINEAGE              | 4   | 78   | 16175 | 157  | 5.308836 | 0.006871 |
| purple      | 7576 | MIKKELSEN_IPS_ICP_WITH_H3K4ME3_AND_H327ME3   | 4   | 78   | 16175 | 157  | 5.308836 | 0.006871 |
| lightcyan   | 9365 | GSE22886_NAIVE_BCELL_VS_NEUTROPHIL_DN        | 4   | 198  | 16055 | 62   | 5.295862 | 0.006873 |
| brown       | 3463 | SIG_IL4RECEPTOR_IN_B_LYPHOCYTES              | 9   | 27   | 16226 | 2190 | 2.47382  | 0.006874 |
| brown       | 4726 | REACTOME_THE_ROLE_OF_NEF_IN_HIV1_REPLICATION | 9   | 27   | 16226 | 2190 | 2.47382  | 0.006874 |
| brown       | 8152 | HOLLEMAN_VINCRISTINE_RESISTANCE_ALL_UP       | 9   | 27   | 16226 | 2190 | 2.47382  | 0.006874 |
| greenyello  | 9983 | GSE3982_EOSINOPHIL_VS_EFF_MEMORY_CD4_TCELL_  | 6   | 182  | 16071 | 150  | 3.572088 | 0.006881 |
| yellow      | 9032 | GSE17721_PAM3CSK4_VS_GADIQUIMOD_12H_BMDM     | 27  | 187  | 16066 | 1426 | 1.645645 | 0.006887 |
| yellow      | 9617 | GSE27786_NEUTROPHIL_VS_MONO_MAC_DN           | 27  | 187  | 16066 | 1426 | 1.645645 | 0.006887 |
| brown       | 5099 | KIM_WT1_TARGETS_UP                           | 39  | 195  | 16058 | 2190 | 1.484292 | 0.006888 |
| brown       | 8686 | GSE1460_INTRATHYMIC_T_PROGENITOR_VS_CD4_THY  | 39  | 195  | 16058 | 2190 | 1.484292 | 0.006888 |
| brown       | 9309 | GSE22886_NAIVE_CD8_TCELL_VS_MEMORY_TCELL_DN  | 39  | 195  | 16058 | 2190 | 1.484292 | 0.006888 |
| yellow      | 42   | CYTOPLASMIC_PART                             | 137 | 1277 | 14976 | 1426 | 1.222767 | 0.0069   |
| greenyello  | 2260 | YTAATTAA_V\$LHX3_01                          | 5   | 129  | 16124 | 150  | 4.199742 | 0.006901 |
| greenyello  | 9923 | GSE37416_CTRL_VS_0H_F_TULARENSIS_LVS_NEUTROP | 5   | 129  | 16124 | 150  | 4.199742 | 0.006901 |

|             |       |                                             |     |      |       |      |          |          |
|-------------|-------|---------------------------------------------|-----|------|-------|------|----------|----------|
| turquoise   | 2591  | GNF2_HDAC1                                  | 40  | 109  | 16144 | 4169 | 1.430656 | 0.006902 |
| magenta     | 1326  | PROTEIN_KINASE_REGULATOR_ACTIVITY           | 3   | 38   | 16215 | 167  | 7.683423 | 0.006905 |
| magenta     | 8185  | ZWANG_CLASS_2_TRANSIENTLY_INDUCED_BY_EGF    | 3   | 38   | 16215 | 167  | 7.683423 | 0.006905 |
| purple      | 1607  | V\$SRF_C                                    | 6   | 174  | 16079 | 157  | 3.569734 | 0.006905 |
| pink        | 10135 | GSE6269_FLU_VS_E_COLI_INF_PBMC_DN           | 6   | 120  | 16133 | 228  | 3.564254 | 0.006921 |
| lightyellow | 9786  | GSE34205_HEALTHY_VS_RSV_INF_INFANT_PBMC_UP  | 3   | 193  | 16060 | 33   | 7.655676 | 0.006922 |
| cyan        | 6186  | SMITH_TERT_TARGETS_DN                       | 3   | 82   | 16171 | 77   | 7.722363 | 0.006924 |
| cyan        | 7807  | SASSON_RESPONSE_TO_GONADOTROPHINS_DN        | 3   | 82   | 16171 | 77   | 7.722363 | 0.006924 |
| magenta     | 1620  | V\$AHRARNT_01                               | 5   | 116  | 16137 | 167  | 4.194972 | 0.006925 |
| magenta     | 6323  | PETROVA_ENDOTHELIUM_LYMPHATIC_VS_BLOOD_UP   | 5   | 116  | 16137 | 167  | 4.194972 | 0.006925 |
| brown       | 10080 | GSE3982_BASOPHIL_VS_TH2_UP                  | 38  | 189  | 16064 | 2190 | 1.492146 | 0.006934 |
| blue        | 2194  | TCCATTKW_UNKNOWN                            | 51  | 200  | 16053 | 2978 | 1.391711 | 0.006937 |
| blue        | 8475  | GSE11864_CSF1_IFNG_VS_CSF1_PAM3CYS_IN_MAC_D | 46  | 177  | 16076 | 2978 | 1.418383 | 0.00694  |
| blue        | 9053  | GSE17721_LPS_VS_CPG_16H_BMDM_DN             | 46  | 177  | 16076 | 2978 | 1.418383 | 0.00694  |
| turquoise   | 2516  | GCM_DLG1                                    | 30  | 77   | 16176 | 4169 | 1.51891  | 0.006941 |
| yellow      | 9126  | GSE17721_0.5H_VS_12H_CPG_BMDM_UP            | 28  | 196  | 16057 | 1426 | 1.628231 | 0.006941 |
| yellow      | 9782  | GSE339_EX_VIVO_VS_IN_CULTURE_CD8POS_DC_UP   | 28  | 196  | 16057 | 1426 | 1.628231 | 0.006941 |
| lightcyan   | 3630  | MODULE_145                                  | 3   | 102  | 16151 | 62   | 7.710152 | 0.006942 |
| greenyello  | 3555  | MODULE_66                                   | 10  | 433  | 15820 | 150  | 2.502386 | 0.006942 |
| brown       | 77    | GOLGI_APPARATUS_PART                        | 22  | 95   | 16158 | 2190 | 1.718654 | 0.006954 |
| brown       | 2455  | MORF_RAB5A                                  | 22  | 95   | 16158 | 2190 | 1.718654 | 0.006954 |
| purple      | 5486  | FARMER_BREAST_CANCER_APOCRINE_VS_LUMINAL    | 8   | 288  | 15965 | 157  | 2.875619 | 0.006954 |
| brown       | 5312  | MCBRYAN_PUBERTAL_TGFB1_TARGETS_UP           | 32  | 153  | 16100 | 2190 | 1.552201 | 0.006962 |
| pink        | 8381  | LEF1_UP.V1_UP                               | 7   | 158  | 16095 | 228  | 3.1582   | 0.006968 |
| blue        | 4708  | REACTOME_LATE_PHASE_OF_HIV_LIFE_CYCLE       | 29  | 101  | 16152 | 2978 | 1.567059 | 0.006973 |
| blue        | 5740  | PUJANA_BREAST_CANCER_LIT_INT_NETWORK        | 29  | 101  | 16152 | 2978 | 1.567059 | 0.006973 |
| black       | 1893  | V\$EGR_Q6                                   | 10  | 229  | 16024 | 283  | 2.507908 | 0.006974 |
| red         | 886   | REGULATION_OF_NUCLEOBASENUCLEOSIDENUCLEOTIC | 29  | 552  | 15701 | 524  | 1.629526 | 0.006976 |
| salmon      | 138   | SPLICEOSOME                                 | 3   | 50   | 16203 | 127  | 7.678583 | 0.006989 |
| salmon      | 4662  | REACTOME_DESTABILIZATION_OF_MRNA_BY_AUF1_H  | 3   | 50   | 16203 | 127  | 7.678583 | 0.006989 |
| magenta     | 8226  | VEGF_A_UP.V1_UP                             | 6   | 164  | 16089 | 167  | 3.56061  | 0.00699  |
| brown       | 9499  | GSE2706_UNSTIM_VS_2H_R848_DC_DN             | 36  | 177  | 16076 | 2190 | 1.50945  | 0.006995 |
| green       | 4566  | REACTOME_RNA_POL_I_RNA_POL_III_AND_MITOCHOI | 15  | 93   | 16160 | 1305 | 2.008775 | 0.006996 |
| lightgreen  | 3582  | MODULE_94                                   | 4   | 296  | 15957 | 42   | 5.229408 | 0.007003 |
| tan         | 9921  | GSE36476_YOUNG_VS_OLD_DONOR_MEMORY_CD4_T    | 6   | 189  | 16064 | 145  | 3.558402 | 0.007005 |
| magenta     | 2274  | CCCNNGGAR_V\$OLF1_01                        | 8   | 271  | 15982 | 167  | 2.873014 | 0.007005 |
| lightcyan   | 104   | MICROSOME                                   | 2   | 33   | 16220 | 62   | 15.88759 | 0.007006 |
| black       | 7377  | HOFFMANN_PRE_BI_TO_LARGE_PRE_BII_LYMPHOCYTE | 5   | 69   | 16184 | 283  | 4.161674 | 0.007008 |
| pink        | 3530  | MODULE_41                                   | 13  | 424  | 15829 | 228  | 2.185628 | 0.007012 |
| cyan        | 8172  | SMIRNOV_RESPONSE_TO_IR_6HR_UP               | 4   | 160  | 16093 | 77   | 5.276948 | 0.007014 |
| turquoise   | 8464  | GSE11864_UNTREATED_VS_CSF1_PAM3CYS_IN_MAC_I | 64  | 189  | 16064 | 4169 | 1.320139 | 0.007016 |
| turquoise   | 9040  | GSE17721_LPS_VS_CPG_1H_BMDM_UP              | 64  | 189  | 16064 | 4169 | 1.320139 | 0.007016 |
| turquoise   | 10034 | GSE3982_MAC_VS_BASOPHIL_UP                  | 64  | 189  | 16064 | 4169 | 1.320139 | 0.007016 |
| blue        | 528   | COFACTOR_CATABOLIC_PROCESS                  | 5   | 8    | 16245 | 2978 | 3.411056 | 0.007041 |
| midnightb   | 6430  | IVANOVA_HEMATOPOIESIS_LATE_PROGENITOR       | 7   | 514  | 15739 | 71   | 3.117526 | 0.007048 |
| turquoise   | 2271  | GATTGGY_V\$NFY_Q6_01                        | 291 | 1003 | 15250 | 4169 | 1.131081 | 0.007054 |
| purple      | 6788  | BILD_HRAS_ONCOGENIC_SIGNATURE               | 7   | 230  | 16023 | 157  | 3.150678 | 0.007055 |
| red         | 1077  | NUCLEOTIDE_BINDING                          | 14  | 206  | 16047 | 524  | 2.107963 | 0.007056 |
| greenyello  | 8721  | GSE14769_UNSTIM_VS_80MIN_LPS_BMDM_DN        | 6   | 183  | 16070 | 150  | 3.552568 | 0.007062 |
| greenyello  | 10174 | GSE7460_FOXP3_MUT_VS_WT_ACT_WITH_TGFB_TCOI  | 6   | 183  | 16070 | 150  | 3.552568 | 0.007062 |
| red         | 9257  | GSE20151_CTRL_VS_FUSOBACT_NUCLEATUM_NEUTRC  | 13  | 185  | 16068 | 524  | 2.179585 | 0.007063 |
| blue        | 869   | PIGMENT_BIOSYNTHETIC_PROCESS                | 7   | 14   | 16239 | 2978 | 2.728845 | 0.007068 |
| blue        | 1320  | LIGASE_ACTIVITY_FORMING_CARBON_OXYGEN_BOND  | 7   | 14   | 16239 | 2978 | 2.728845 | 0.007068 |
| blue        | 5310  | HUMMERICH_BENIGN_SKIN_TUMOR_UP              | 7   | 14   | 16239 | 2978 | 2.728845 | 0.007068 |
| blue        | 2497  | GCM_AIP                                     | 14  | 39   | 16214 | 2978 | 1.959171 | 0.007075 |
| purple      | 3617  | MODULE_129                                  | 6   | 175  | 16078 | 157  | 3.549336 | 0.007095 |
| lightgreen  | 7269  | WU_SILENCED_BY_METHYLATION_IN_BLADDER_CANCI | 2   | 49   | 16204 | 42   | 15.79495 | 0.007099 |
| red         | 949   | NUCLEOTIDE_METABOLIC_PROCESS                | 5   | 38   | 16215 | 524  | 4.081207 | 0.007125 |
| greenyello  | 287   | INORGANIC_ANION_TRANSPORT                   | 2   | 14   | 16239 | 150  | 15.47905 | 0.007159 |
| greenyello  | 6897  | JI_CARCINOGENESIS_BY_KRAS_AND_STK11_DN      | 2   | 14   | 16239 | 150  | 15.47905 | 0.007159 |

|             |       |                                                |     |      |       |      |          |          |
|-------------|-------|------------------------------------------------|-----|------|-------|------|----------|----------|
| turquoise   | 833   | TRANSCRIPTION_INITIATION_FROM_RNA_POLYMERASI   | 14  | 29   | 16224 | 4169 | 1.882052 | 0.007159 |
| turquoise   | 8058  | WAKABAYASHI_ADIPOGENESIS_PPARG_BOUND_36HR      | 14  | 29   | 16224 | 4169 | 1.882052 | 0.007159 |
| cyan        | 7809  | SASSON_RESPONSE_TO_FORSKOLIN_DN                | 3   | 83   | 16170 | 77   | 7.629322 | 0.007159 |
| magenta     | 7008  | RIGGI_EWING_SARCOMA_PROGENITOR_UP              | 9   | 330  | 15923 | 167  | 2.654273 | 0.007161 |
| turquoise   | 9009  | GSE17721_POLYIC_VS_CPG_4H_BMDM_DN              | 61  | 179  | 16074 | 4169 | 1.328552 | 0.007163 |
| green       | 7331  | YOSHIMURA_MAPK8_TARGETS_UP                     | 97  | 947  | 15306 | 1305 | 1.275689 | 0.007163 |
| cyan        | 9652  | GSE29617_DAY3_VS_DAY7_TIV_FLU_VACCINE_PBMCI    | 4   | 161  | 16092 | 77   | 5.244172 | 0.007167 |
| purple      | 1663  | V\$PAX8_B                                      | 4   | 79   | 16174 | 157  | 5.241635 | 0.007184 |
| blue        | 5141  | DODD_NASOPHARYNGEAL_CARCINOMA_DN               | 274 | 1311 | 14942 | 2978 | 1.140661 | 0.007204 |
| purple      | 546   | ANATOMICAL_STRUCTURE_FORMATION                 | 3   | 41   | 16212 | 157  | 7.574802 | 0.007205 |
| midnightb   | 9169  | GSE17974_CTRL_VS_ACT_IL4_AND_ANTI_IL12_0.5H_CI | 4   | 175  | 16078 | 71   | 5.232354 | 0.007206 |
| turquoise   | 8413  | GSE10239_MEMORY_VS_KLRG1INT_EFF_CD8_TCELL_D    | 66  | 196  | 16057 | 4169 | 1.312773 | 0.007206 |
| turquoise   | 9236  | GSE18791_CTRL_VS_NEWCASTLE_VIRUS_DC_18H_UP     | 66  | 196  | 16057 | 4169 | 1.312773 | 0.007206 |
| turquoise   | 9946  | GSE37416_12H_VS_48H_F_TULARENSIS_LVS_NEUTROI   | 66  | 196  | 16057 | 4169 | 1.312773 | 0.007206 |
| turquoise   | 10089 | GSE3982_EFF_MEMORY_CD4_TCELL_VS_TH2_DN         | 66  | 196  | 16057 | 4169 | 1.312773 | 0.007206 |
| turquoise   | 7036  | ACEVEDO_LIVER_TUMOR_VS_NORMAL_ADJACENT_TIS     | 244 | 831  | 15422 | 4169 | 1.144697 | 0.007217 |
| purple      | 2222  | YKACATTT_UNKNOWN                               | 7   | 231  | 16022 | 157  | 3.137039 | 0.007218 |
| red         | 2218  | YGACNNYACAR_UNKNOWN                            | 7   | 70   | 16183 | 524  | 3.101718 | 0.007226 |
| red         | 3631  | MODULE_146                                     | 7   | 70   | 16183 | 524  | 3.101718 | 0.007226 |
| greenyello  | 2203  | TTANTCA_UNKNOWN                                | 14  | 725  | 15528 | 150  | 2.09234  | 0.007235 |
| greenyello  | 1909  | V\$SRF_Q5_01                                   | 6   | 184  | 16069 | 150  | 3.533261 | 0.007246 |
| greenyello  | 8435  | GSE10325_CD4_TCELL_VS_LUPUS_CD4_TCELL_DN       | 6   | 184  | 16069 | 150  | 3.533261 | 0.007246 |
| brown       | 7240  | GRESHOCK_CANCER_COPY_NUMBER_UP                 | 55  | 295  | 15958 | 2190 | 1.383662 | 0.007246 |
| red         | 8238  | ATM_DN.V1_UP                                   | 9   | 106  | 16147 | 524  | 2.633534 | 0.007255 |
| turquoise   | 9917  | GSE36476_YOUNG_VS_OLD_DONOR_MEMORY_CD4_T       | 58  | 169  | 16084 | 4169 | 1.337959 | 0.007281 |
| greenyello  | 8351  | KRAS.AMP.LUNG_UP.V1_UP                         | 4   | 83   | 16170 | 150  | 5.221847 | 0.007288 |
| purple      | 8257  | LTE2_UP.V1_DN                                  | 6   | 176  | 16077 | 157  | 3.529169 | 0.007288 |
| magenta     | 6935  | HELLER_HDAC_TARGETS_DN                         | 8   | 273  | 15980 | 167  | 2.851966 | 0.007309 |
| greenyello  | 2287  | TATAAA_V\$TATA_01                              | 16  | 880  | 15373 | 150  | 1.970061 | 0.007316 |
| green       | 8845  | GSE17721_CTRL_VS_LPS_12H_BMDM_DN               | 24  | 176  | 16077 | 1305 | 1.698328 | 0.007317 |
| lightyellow | 9446  | GSE24634_TREG_VS_TCONV_POST_DAY10_IL4_CONVE    | 3   | 197  | 16056 | 33   | 7.500231 | 0.007323 |
| lightgreen  | 7831  | LI_INDUCED_T_TO_NATURAL_KILLER_UP              | 4   | 300  | 15953 | 42   | 5.159683 | 0.007337 |
| yellow      | 649   | DEVELOPMENT_OF_PRIMARY_SEXUAL_CHARACTERISTI    | 5   | 15   | 16238 | 1426 | 3.799205 | 0.007338 |
| red         | 8070  | HUANG_GATA2_TARGETS_UP                         | 11  | 145  | 16108 | 524  | 2.353027 | 0.007344 |
| red         | 8232  | ATF2_S_UP.V1_UP                                | 11  | 145  | 16108 | 524  | 2.353027 | 0.007344 |
| greenyello  | 8264  | PRC1_BMI_UP.V1_UP                              | 5   | 131  | 16122 | 150  | 4.135623 | 0.007354 |
| tan         | 10045 | GSE3982_MAC_VS_TH2_DN                          | 6   | 191  | 16062 | 145  | 3.521141 | 0.007361 |
| tan         | 10206 | GSE7852_LN_VS_FAT_TCONV_UP                     | 6   | 191  | 16062 | 145  | 3.521141 | 0.007361 |
| turquoise   | 2079  | ATGTCAC,MIR-489                                | 28  | 71   | 16182 | 4169 | 1.537451 | 0.007373 |
| red         | 9576  | GSE27786_CD4_VS_CD8_TCELL_UP                   | 13  | 186  | 16067 | 524  | 2.167867 | 0.007379 |
| turquoise   | 1963  | AAAGGGA,MIR-204,MIR-211                        | 68  | 203  | 16050 | 4169 | 1.305914 | 0.007379 |
| lightgreen  | 6590  | ZHU_CMV_8_HR_DN                                | 2   | 50   | 16203 | 42   | 15.47905 | 0.007383 |
| salmon      | 4629  | REACTOME_CIRCADIAN_CLOCK                       | 3   | 51   | 16202 | 127  | 7.528022 | 0.007384 |
| purple      | 7689  | DANG_REGULATED_BY_MYC_DN                       | 7   | 232  | 16021 | 157  | 3.123517 | 0.007384 |
| yellow      | 8513  | GSE12845_IGD_NEG_BLOOD_VS_NAIVE_TONSIL_BCELL   | 27  | 188  | 16065 | 1426 | 1.636892 | 0.00739  |
| blue        | 9584  | GSE27786_CD4_TCELL_VS_NEUTROPHIL_UP            | 50  | 196  | 16057 | 2978 | 1.392268 | 0.007394 |
| blue        | 9610  | GSE27786_NKTCELL_VS_MONO_MAC_UP                | 50  | 196  | 16057 | 2978 | 1.392268 | 0.007394 |
| blue        | 10263 | GSE9650_EFFECTOR_VS_MEMORY_CD8_TCELL_DN        | 50  | 196  | 16057 | 2978 | 1.392268 | 0.007394 |
| green       | 1270  | RHODOPSIN_LIKE_RECEPTOR_ACTIVITY               | 12  | 68   | 16185 | 1305 | 2.197836 | 0.007397 |
| greenyello  | 2246  | RYTTCCTG_V\$ETS2_B                             | 17  | 960  | 15293 | 150  | 1.918757 | 0.007399 |
| blue        | 5505  | SCHLOSSER_MYC_TARGETS_AND_SERUM_RESPONSE_I     | 16  | 47   | 16206 | 2978 | 1.857937 | 0.007403 |
| blue        | 6752  | LEE_CALORIE_RESTRICTION_MUSCLE_DN              | 16  | 47   | 16206 | 2978 | 1.857937 | 0.007403 |
| turquoise   | 6717  | DAZARD_UV_RESPONSE_CLUSTER_G6                  | 52  | 149  | 16104 | 4169 | 1.360563 | 0.007404 |
| salmon      | 3525  | MODULE_36                                      | 5   | 155  | 16098 | 127  | 4.12827  | 0.007406 |
| salmon      | 5504  | SCHLOSSER_MYC_TARGETS_REPRESSED_BY_SERUM       | 5   | 155  | 16098 | 127  | 4.12827  | 0.007406 |
| magenta     | 247   | MUSCLE_DEVELOPMENT                             | 4   | 75   | 16178 | 167  | 5.190579 | 0.007422 |
| magenta     | 847   | NEUROGENESIS                                   | 4   | 75   | 16178 | 167  | 5.190579 | 0.007422 |
| magenta     | 4581  | REACTOME_L1CAM_INTERACTIONS                    | 4   | 75   | 16178 | 167  | 5.190579 | 0.007422 |
| magenta     | 7279  | BOHN_PRIMARY_IMMUNODEFICIENCY_SYNDROM_DN       | 3   | 39   | 16214 | 167  | 7.486412 | 0.007425 |
| black       | 3123  | chr8q24                                        | 7   | 129  | 16124 | 283  | 3.116416 | 0.007425 |

|             |                                                    |    |     |       |      |          |          |
|-------------|----------------------------------------------------|----|-----|-------|------|----------|----------|
| lightyellow | 9439 GSE24634_NAIVE_CD4_TCELL_VS_DAY10_IL4_CONV_T  | 3  | 198 | 16055 | 33   | 7.462351 | 0.007426 |
| lightyellow | 10072 GSE3982_BASOPHIL_VS_EFF_MEMORY_CD4_TCELL_UF  | 3  | 198 | 16055 | 33   | 7.462351 | 0.007426 |
| lightcyan   | 7112 HONMA_DOCETAXEL_RESISTANCE                    | 2  | 34  | 16219 | 62   | 15.4203  | 0.007426 |
| yellow      | 2578 GNF2_CDC20                                    | 11 | 55  | 16198 | 1426 | 2.279523 | 0.007428 |
| red         | 5488 FARMER_BREAST_CANCER_BASAL_VS_LULMINAL        | 18 | 295 | 15958 | 524  | 1.892573 | 0.007432 |
| brown       | 5733 SPIELMAN_LYMPHOBLAST_EUROPEAN_VS_ASIAN_DN     | 99 | 581 | 15672 | 2190 | 1.264586 | 0.007432 |
| greenyello  | 1837 V\$CDX2_Q5                                    | 6  | 185 | 16068 | 150  | 3.514162 | 0.007433 |
| brown       | 530 MYELOID_CELL_DIFFERENTIATION                   | 10 | 32  | 16221 | 2190 | 2.319207 | 0.007438 |
| brown       | 2714 GNF2_TYK2                                     | 10 | 32  | 16221 | 2190 | 2.319207 | 0.007438 |
| brown       | 4587 REACTOME_SIGNAL_TRANSDUCTION_BY_L1            | 10 | 32  | 16221 | 2190 | 2.319207 | 0.007438 |
| brown       | 6397 WEIGEL_OXIDATIVE_STRESS_BY_TBH_AND_H2O2       | 10 | 32  | 16221 | 2190 | 2.319207 | 0.007438 |
| blue        | 921 CHROMOSOME_ORGANIZATION_AND_BIOGENESIS         | 33 | 119 | 16134 | 2978 | 1.513477 | 0.007446 |
| pink        | 9720 GSE30083_SP3_VS_SP4_THYMOCYTE_UP              | 7  | 160 | 16093 | 228  | 3.118723 | 0.007446 |
| grey60      | 9748 GSE32423_CTRL_VS_IL7_MEMORY_CD8_TCELL_UP      | 3  | 148 | 16105 | 44   | 7.487561 | 0.007458 |
| cyan        | 7864 WANG_RESPONSE_TO_GSK3_INHIBITOR_SB216763_UF   | 6  | 363 | 15890 | 77   | 3.488891 | 0.007461 |
| yellow      | 9150 GSE17974_0H_VS_0.5H_IN_VITRO_ACT_CD4_TCELL_UI | 23 | 153 | 16100 | 1426 | 1.713367 | 0.007468 |
| blue        | 158 U12_DEPENDENT_SPLICEOSOME                      | 6  | 11  | 16242 | 2978 | 2.976922 | 0.007476 |
| blue        | 1187 TRANSCRIPTION_ELONGATION_REGULATOR_ACTIVITY   | 6  | 11  | 16242 | 2978 | 2.976922 | 0.007476 |
| blue        | 3013 BIOCARTA_TCRA_PATHWAY                         | 6  | 11  | 16242 | 2978 | 2.976922 | 0.007476 |
| blue        | 4439 REACTOME_PURINE_RIBONUCLEOSIDE_MONOPHOSPH     | 6  | 11  | 16242 | 2978 | 2.976922 | 0.007476 |
| blue        | 5827 CAFFAREL_RESPONSE_TO_THC_8HR_5_DN             | 6  | 11  | 16242 | 2978 | 2.976922 | 0.007476 |
| cyan        | 2257 STTTCRNTTT_V\$IRF_Q6                          | 4  | 163 | 16090 | 77   | 5.179826 | 0.007481 |
| purple      | 5235 GRAESSMANN_RESPONSE_TO_MC_AND_SERUM_DEPR      | 6  | 177 | 16076 | 157  | 3.50923  | 0.007485 |
| purple      | 10189 GSE7764_IL15_TREATED_VS_CTRL_NK_CELL_24H_DN  | 6  | 177 | 16076 | 157  | 3.50923  | 0.007485 |
| red         | 332 PROTEIN_TETRAMERIZATION                        | 3  | 13  | 16240 | 524  | 7.15781  | 0.007486 |
| red         | 750 NLS_BEARING_SUBSTRATE_IMPORT_INTO_NUCLEUS      | 3  | 13  | 16240 | 524  | 7.15781  | 0.007486 |
| red         | 4632 REACTOME_REGULATION_OF_IFNG_SIGNALING         | 3  | 13  | 16240 | 524  | 7.15781  | 0.007486 |
| red         | 5420 SANCHEZ_MDM2_TARGETS                          | 3  | 13  | 16240 | 524  | 7.15781  | 0.007486 |
| red         | 7593 SETLUR_PROSTATE_CANCER_TMPRSS2_ERG_FUSION_I   | 3  | 13  | 16240 | 524  | 7.15781  | 0.007486 |
| midnightb   | 8602 GSE13738_RESTING_VS_TCR_ACTIVATED_CD4_TCELL_I | 4  | 177 | 16076 | 71   | 5.173231 | 0.007495 |
| brown       | 8791 GSE15930_NAIVE_VS_72H_IN_VITRO_STIM_IL12_CD8_ | 39 | 196 | 16057 | 2190 | 1.476719 | 0.00751  |
| brown       | 8822 GSE16755_CTRL_VS_IFNA_TREATED_MAC_UP          | 39 | 196 | 16057 | 2190 | 1.476719 | 0.00751  |
| brown       | 10256 GSE9650_NAIVE_VS_EXHAUSTED_CD8_TCELL_UP      | 39 | 196 | 16057 | 2190 | 1.476719 | 0.00751  |
| brown       | 10268 GSE9988_ANTI_TREM1_VS_LPS_MONOCYTE_UP        | 39 | 196 | 16057 | 2190 | 1.476719 | 0.00751  |
| blue        | 7263 BOYLAN_MULTIPLE_MYELOMA_D_UP                  | 24 | 80  | 16173 | 2978 | 1.637307 | 0.00751  |
| red         | 6935 HELLER_HDAC_TARGETS_DN                        | 17 | 273 | 15980 | 524  | 1.931472 | 0.00753  |
| purple      | 3218 chr6p21                                       | 8  | 292 | 15961 | 157  | 2.836227 | 0.007531 |
| midnightb   | 8175 GHANDHI_DIRECT_IRRADIATION_DN                 | 2  | 30  | 16223 | 71   | 15.26103 | 0.007563 |
| brown       | 8691 GSE1460_INTRATHYMIC_T_PROGENITOR_VS_NAIVE_CI  | 38 | 190 | 16063 | 2190 | 1.484292 | 0.00757  |
| blue        | 9417 GSE24142_EARLY_THYMIC_PROGENITOR_VS_DN3_THY   | 48 | 187 | 16066 | 2978 | 1.400904 | 0.007572 |
| red         | 1002 INTRACELLULAR_SIGNALING_CASCADE               | 30 | 580 | 15673 | 524  | 1.604337 | 0.007574 |
| brown       | 2686 GNF2_PTPRC                                    | 17 | 68  | 16185 | 2190 | 1.855365 | 0.007574 |
| brown       | 4337 REACTOME_INTEGRIN_CELL_SURFACE_INTERACTIONS   | 17 | 68  | 16185 | 2190 | 1.855365 | 0.007574 |
| yellow      | 2639 GNF2_EIF3S6                                   | 19 | 119 | 16134 | 1426 | 1.819787 | 0.007576 |
| green       | 4327 REACTOME_RNA_POL_I_TRANSCRIPTION              | 11 | 60  | 16193 | 1305 | 2.283308 | 0.007582 |
| turquoise   | 2373 MORF_DAP3                                     | 65 | 193 | 16060 | 4169 | 1.312979 | 0.007584 |
| turquoise   | 4697 REACTOME_HIV_INFECTION                        | 65 | 193 | 16060 | 4169 | 1.312979 | 0.007584 |
| turquoise   | 8568 GSE13484_12H_UNSTIM_VS_YF17D_VACCINE_STIM_PI  | 65 | 193 | 16060 | 4169 | 1.312979 | 0.007584 |
| turquoise   | 8919 GSE17721_LPS_VS_POLYIC_4H_BMDM_DN             | 65 | 193 | 16060 | 4169 | 1.312979 | 0.007584 |
| turquoise   | 9975 GSE3982_EOSINOPHIL_VS_MAC_DN                  | 65 | 193 | 16060 | 4169 | 1.312979 | 0.007584 |
| turquoise   | 10099 GSE3982_NKCELL_VS_TH2_DN                     | 65 | 193 | 16060 | 4169 | 1.312979 | 0.007584 |
| grey60      | 8626 GSE14026_TH1_VS_TH17_UP                       | 3  | 149 | 16104 | 44   | 7.437309 | 0.007598 |
| greenyello  | 7140 GRADE_COLON_AND_RECTAL_CANCER_DN              | 4  | 84  | 16169 | 150  | 5.159683 | 0.007598 |
| magenta     | 20 EXTERNAL_SIDE_OF_PLASMA_MEMBRANE                | 2  | 13  | 16240 | 167  | 14.97282 | 0.007599 |
| magenta     | 1010 CELL_MATURATION                               | 2  | 13  | 16240 | 167  | 14.97282 | 0.007599 |
| magenta     | 3629 MODULE_143                                    | 2  | 13  | 16240 | 167  | 14.97282 | 0.007599 |
| magenta     | 3910 MODULE_543                                    | 2  | 13  | 16240 | 167  | 14.97282 | 0.007599 |
| magenta     | 4871 DAVICIONI_RHABDOMYOSARCOMA_PAX_FOXO1_FUSI     | 2  | 13  | 16240 | 167  | 14.97282 | 0.007599 |
| magenta     | 7011 VICENT_METASTASIS_UP                          | 2  | 13  | 16240 | 167  | 14.97282 | 0.007599 |
| midnightb   | 5024 HOEBEKE_LYMPHOID_STEM_CELL_UP                 | 3  | 92  | 16161 | 71   | 7.464636 | 0.0076   |

|             |                                                    |    |      |       |      |          |          |
|-------------|----------------------------------------------------|----|------|-------|------|----------|----------|
| pink        | 6292 NEMETH_INFLAMMATORY_RESPONSE_LPS_DN           | 3  | 29   | 16224 | 228  | 7.374319 | 0.007607 |
| pink        | 7577 MIKKELSEN_IPS_ICP_WITH_H3K27ME3               | 3  | 29   | 16224 | 228  | 7.374319 | 0.007607 |
| red         | 6324 LI_WILMS_TUMOR_VS_FETAL_KIDNEY_1_UP           | 12 | 166  | 16087 | 524  | 2.242205 | 0.007615 |
| blue        | 1988 CTCTGGA,MIR-520A,MIR-525                      | 37 | 137  | 16116 | 2978 | 1.473975 | 0.00762  |
| brown       | 8423 GSE10325_CD4_TCELL_VS_BCELL_DN                | 37 | 184  | 16069 | 2190 | 1.492359 | 0.007621 |
| brown       | 10158 GSE7460_CD8_TCELL_VS_TREG_ACT_UP             | 37 | 184  | 16069 | 2190 | 1.492359 | 0.007621 |
| salmon      | 2119 AGTCTAG,MIR-151                               | 2  | 17   | 16236 | 127  | 15.05604 | 0.00763  |
| salmon      | 3797 MODULE_352                                    | 2  | 17   | 16236 | 127  | 15.05604 | 0.00763  |
| salmon      | 3821 MODULE_388                                    | 2  | 17   | 16236 | 127  | 15.05604 | 0.00763  |
| turquoise   | 3325 chr19p12                                      | 15 | 32   | 16221 | 4169 | 1.827439 | 0.007632 |
| turquoise   | 5824 CAFFAREL_RESPONSE_TO_THC_UP                   | 15 | 32   | 16221 | 4169 | 1.827439 | 0.007632 |
| turquoise   | 5869 SCHAEFFER_PROSTATE_DEVELOPMENT_AND_CANCER_    | 15 | 32   | 16221 | 4169 | 1.827439 | 0.007632 |
| cyan        | 8226 VEGF_A_UP.V1_UP                               | 4  | 164  | 16089 | 77   | 5.148242 | 0.007641 |
| cyan        | 9022 GSE17721_PAM3CSK4_VS_GADIQUIMOD_1H_BMDM_      | 4  | 164  | 16089 | 77   | 5.148242 | 0.007641 |
| midnightb   | 9500 GSE2706_UNSTIM_VS_8H_R848_DC_UP               | 4  | 178  | 16075 | 71   | 5.144168 | 0.007642 |
| black       | 7383 HOFFMANN_IMMATURE_TO_MATURE_B_LYMPHOCYT       | 4  | 45   | 16208 | 283  | 5.104986 | 0.007655 |
| brown       | 168 RECEPTOR_COMPLEX                               | 13 | 47   | 16206 | 2190 | 2.052745 | 0.007657 |
| brown       | 9429 GSE24142_ADULT_VS_FETAL_DN2_THYMOCYTE_DN      | 36 | 178  | 16075 | 2190 | 1.50097  | 0.007661 |
| brown       | 9779 GSE339_CD8POS_VS_CD4CD8DN_DC_IN_CULTURE_DN    | 36 | 178  | 16075 | 2190 | 1.50097  | 0.007661 |
| lightgreen  | 5943 AMIT_SERUM_RESPONSE_240_MCF10A                | 2  | 51   | 16202 | 42   | 15.17554 | 0.007672 |
| lightyellow | 7312 LINDSTEDT_DENDRITIC_CELL_MATURATION_D         | 2  | 65   | 16188 | 33   | 15.15431 | 0.007677 |
| purple      | 1814 V\$AP3_Q6                                     | 6  | 178  | 16075 | 157  | 3.489515 | 0.007686 |
| purple      | 8353 KRAS.DF.V1_UP                                 | 6  | 178  | 16075 | 157  | 3.489515 | 0.007686 |
| purple      | 9854 GSE360_HIGH_VS_LOW_DOSE_B_MALAYI_DC_UP        | 6  | 178  | 16075 | 157  | 3.489515 | 0.007686 |
| tan         | 312 CHROMATIN_ASSEMBLY                             | 2  | 15   | 16238 | 145  | 14.94529 | 0.007691 |
| tan         | 681 RRNA_PROCESSING                                | 2  | 15   | 16238 | 145  | 14.94529 | 0.007691 |
| tan         | 1014 RRNA_METABOLIC_PROCESS                        | 2  | 15   | 16238 | 145  | 14.94529 | 0.007691 |
| tan         | 3712 MODULE_240                                    | 2  | 15   | 16238 | 145  | 14.94529 | 0.007691 |
| cyan        | 8348 STK33_SKM_UP                                  | 5  | 259  | 15994 | 77   | 4.074863 | 0.007693 |
| magenta     | 2234 CAGCTG_V\$AP4_Q5                              | 22 | 1231 | 15022 | 167  | 1.739329 | 0.007694 |
| pink        | 1546 V\$HNF1_01                                    | 7  | 161  | 16092 | 228  | 3.099352 | 0.007695 |
| brown       | 940 NEGATIVE_REGULATION_OF_DEVELOPMENTAL_PROCE     | 34 | 166  | 16087 | 2190 | 1.520058 | 0.007702 |
| red         | 9144 GSE17721_0.5H_VS_24H_GARDIQUIMOD_BMDM_UP      | 13 | 187  | 16066 | 524  | 2.156274 | 0.007705 |
| red         | 9591 GSE27786_CD8_TCELL_VS_NKTCELL_DN              | 13 | 187  | 16066 | 524  | 2.156274 | 0.007705 |
| purple      | 1169 PHOSPHOLIPID_BINDING                          | 3  | 42   | 16211 | 157  | 7.394449 | 0.007705 |
| purple      | 5796 NAKAYAMA_FRA2_TARGETS                         | 3  | 42   | 16211 | 157  | 7.394449 | 0.007705 |
| brown       | 3083 BIOCARTA_MET_PATHWAY                          | 11 | 37   | 16216 | 2190 | 2.20638  | 0.007707 |
| brown       | 3462 ST_P38_MAPK_PATHWAY                           | 11 | 37   | 16216 | 2190 | 2.20638  | 0.007707 |
| tan         | 8459 GSE11057_PBMC_VS_MEM_CD4_TCELL_DN             | 6  | 193  | 16060 | 145  | 3.484652 | 0.00773  |
| cyan        | 6276 GILDEA_METASTASIS                             | 2  | 28   | 16225 | 77   | 15.07699 | 0.007732 |
| cyan        | 6793 KRIGE_AMINO_ACID_DEPRIVATION                  | 2  | 28   | 16225 | 77   | 15.07699 | 0.007732 |
| blue        | 9156 GSE17974_0H_VS_4H_IN_VITRO_ACT_CD4_TCELL_UP   | 46 | 178  | 16075 | 2978 | 1.410414 | 0.007734 |
| blue        | 9274 GSE20366_CD103_KLRG1_DP_VS_DN_TREG_UP         | 46 | 178  | 16075 | 2978 | 1.410414 | 0.007734 |
| blue        | 9552 GSE27786_LIN_NEG_VS_NKCELL_UP                 | 46 | 178  | 16075 | 2978 | 1.410414 | 0.007734 |
| lightyellow | 7912 WIERENGA_STAT5A_TARGETS_UP                    | 3  | 201  | 16052 | 33   | 7.350972 | 0.007738 |
| turquoise   | 4719 REACTOME_INNATE_IMMUNE_SYSTEM                 | 67 | 200  | 16053 | 4169 | 1.30601  | 0.007766 |
| turquoise   | 4715 REACTOME_APC_C_CDC20_MEDIATED_DEGRADATION     | 26 | 65   | 16188 | 4169 | 1.559415 | 0.007775 |
| pink        | 8329 IL21_UP.V1_DN                                 | 6  | 123  | 16130 | 228  | 3.477321 | 0.007779 |
| pink        | 6934 HELLER_HDAC_TARGETS_UP                        | 10 | 289  | 15964 | 228  | 2.466612 | 0.007797 |
| red         | 488 LOCOMOTORY_BEHAVIOR                            | 7  | 71   | 16182 | 524  | 3.058031 | 0.0078   |
| red         | 7200 HUANG_DASATINIB_RESISTANCE_UP                 | 7  | 71   | 16182 | 524  | 3.058031 | 0.0078   |
| cyan        | 10131 GSE6269_HEALTHY_VS_STREP_AUREUS_INF_PBMC_DN  | 4  | 165  | 16088 | 77   | 5.117041 | 0.007803 |
| salmon      | 8930 GSE17721_POLYIC_VS_PAM3CSK4_0.5H_BMDM_UP      | 5  | 157  | 16096 | 127  | 4.075681 | 0.007807 |
| brown       | 6954 MARTINEZ_RB1_TARGETS_DN                       | 80 | 457  | 15796 | 2190 | 1.299162 | 0.007812 |
| cyan        | 520 LIPID_METABOLIC_PROCESS                        | 5  | 260  | 15993 | 77   | 4.059191 | 0.007815 |
| greenyello  | 9459 GSE24634_IL4_VS_CTRL_TREATED_NAIVE_CD4_TCELL_ | 6  | 187  | 16066 | 150  | 3.476578 | 0.007818 |
| purple      | 2908 BIOCARTA_AMI_PATHWAY                          | 2  | 14   | 16239 | 157  | 14.7889  | 0.007818 |
| purple      | 3765 MODULE_311                                    | 2  | 14   | 16239 | 157  | 14.7889  | 0.007818 |
| purple      | 4676 REACTOME_INTRINSIC_PATHWAY                    | 2  | 14   | 16239 | 157  | 14.7889  | 0.007818 |
| purple      | 7458 LIU_VAV3_PROSTATE_CARCINOGENESIS_DN           | 2  | 14   | 16239 | 157  | 14.7889  | 0.007818 |

|             |       |                                               |     |      |       |      |          |          |
|-------------|-------|-----------------------------------------------|-----|------|-------|------|----------|----------|
| salmon      | 3673  | MODULE_192                                    | 4   | 100  | 16153 | 127  | 5.119055 | 0.007829 |
| magenta     | 9850  | GSE360_T_GONDII_VS_B_MALAYI_LOW_DOSE_DC_UP    | 6   | 168  | 16085 | 167  | 3.475834 | 0.00783  |
| magenta     | 10261 | GSE9650_EFFECTOR_VS_EXHAUSTED_CD8_TCELL_DN    | 6   | 168  | 16085 | 167  | 3.475834 | 0.00783  |
| yellow      | 6795  | KRIGE_RESPONSE_TO_TOSEDOSTAT_6HR_DN           | 98  | 880  | 15373 | 1426 | 1.26928  | 0.007831 |
| purple      | 3657  | MODULE_174                                    | 4   | 81   | 16172 | 157  | 5.112212 | 0.007839 |
| purple      | 3748  | MODULE_289                                    | 4   | 81   | 16172 | 157  | 5.112212 | 0.007839 |
| lightyellow | 951   | G_PROTEIN_COUPLED_RECEPTOR_PROTEIN_SIGNALING  | 3   | 202  | 16051 | 33   | 7.314581 | 0.007844 |
| red         | 6822  | CREIGHTON_ENDOCRINE_THERAPY_RESISTANCE_5      | 24  | 436  | 15817 | 524  | 1.707367 | 0.007844 |
| lightcyan   | 22    | VESICULAR_FRACTION                            | 2   | 35   | 16218 | 62   | 14.97972 | 0.007856 |
| lightcyan   | 7664  | GUTIERREZ_MULTIPLE_MYELOMA_DN                 | 2   | 35   | 16218 | 62   | 14.97972 | 0.007856 |
| turquoise   | 3811  | MODULE_372                                    | 11  | 21   | 16232 | 4169 | 2.042091 | 0.007864 |
| red         | 915   | MEMBRANE_FUSION                               | 4   | 25   | 16228 | 524  | 4.962748 | 0.007887 |
| red         | 1273  | PEPTIDE_RECEPTOR_ACTIVITY                     | 4   | 25   | 16228 | 524  | 4.962748 | 0.007887 |
| purple      | 1896  | V\$SRF_Q4                                     | 6   | 179  | 16074 | 157  | 3.470021 | 0.007891 |
| purple      | 7038  | ACEVEDO_LIVER_CANCER_WITH_H3K27ME3_UP         | 6   | 179  | 16074 | 157  | 3.470021 | 0.007891 |
| red         | 7418  | CHEN_METABOLIC_SYNDROM_NETWORK                | 50  | 1094 | 15159 | 524  | 1.417604 | 0.007897 |
| purple      | 4565  | REACTOME_GPCR_LIGAND_BINDING                  | 7   | 235  | 16018 | 157  | 3.083643 | 0.007898 |
| brown       | 665   | ACTIN_CYTOSKELETON_ORGANIZATION_AND_BIOGENE   | 22  | 96   | 16157 | 2190 | 1.700752 | 0.007902 |
| yellow      | 1359  | TRANSFERASE_ACTIVITY_TRANSFERRING_ONE_CARBO   | 8   | 34   | 16219 | 1426 | 2.681792 | 0.007907 |
| yellow      | 4855  | GAZDA_DIAMOND_BLACKFAN_ANEMIA_MYELOID_DN      | 8   | 34   | 16219 | 1426 | 2.681792 | 0.007907 |
| turquoise   | 9880  | GSE360_T_GONDII_VS_B_MALAYI_LOW_DOSE_MAC_L    | 59  | 173  | 16080 | 4169 | 1.329559 | 0.007929 |
| turquoise   | 121   | ENDOMEMBRANE_SYSTEM                           | 69  | 207  | 16046 | 4169 | 1.299512 | 0.007931 |
| pink        | 7787  | NIELSEN_GIST                                  | 5   | 88   | 16165 | 228  | 4.050289 | 0.007936 |
| red         | 2247  | TTGTTT_V\$FOXO4_01                            | 70  | 1632 | 14621 | 524  | 1.330394 | 0.007954 |
| yellow      | 9228  | GSE18791_CTRL_VS_NEWCASTLE_VIRUS_DC_10H_UP    | 28  | 198  | 16055 | 1426 | 1.611784 | 0.007956 |
| red         | 5177  | LANDIS_BREAST_CANCER_PROGRESSION_UP           | 5   | 39   | 16214 | 524  | 3.976561 | 0.007961 |
| red         | 7465  | CROONQUIST_NRAS_VS_STROMAL_STIMULATION_UP     | 5   | 39   | 16214 | 524  | 3.976561 | 0.007961 |
| cyan        | 9848  | GSE360_T_GONDII_VS_B_MALAYI_HIGH_DOSE_DC_UP   | 4   | 166  | 16087 | 77   | 5.086215 | 0.007967 |
| cyan        | 10046 | GSE3982_NEUTROPHIL_VS_BCELL_UP                | 4   | 166  | 16087 | 77   | 5.086215 | 0.007967 |
| red         | 1700  | V\$NKX61_01                                   | 12  | 167  | 16086 | 524  | 2.228779 | 0.007973 |
| red         | 9585  | GSE27786_CD4_TCELL_VS_NEUTROPHIL_DN           | 12  | 167  | 16086 | 524  | 2.228779 | 0.007973 |
| red         | 9793  | GSE360_CTRL_VS_L_DONOVANI_DC_DN               | 12  | 167  | 16086 | 524  | 2.228779 | 0.007973 |
| lightgreen  | 5620  | MARTORIATI_MDM4_TARGETS_NEUROEPITHELIUM_UI    | 3   | 159  | 16094 | 42   | 7.301438 | 0.007977 |
| blue        | 10227 | GSE9006_HEALTHY_VS_TYPE_1_DIABETES_PBMC_1MC   | 42  | 160  | 16093 | 2978 | 1.432644 | 0.007987 |
| black       | 9251  | GSE19825_NAIVE_VS_IL2RAHIGH_DAY3_EFF_CD8_TCEI | 9   | 198  | 16055 | 283  | 2.610504 | 0.00799  |
| brown       | 51    | GOLGI_APPARATUS                               | 41  | 209  | 16044 | 2190 | 1.455885 | 0.007999 |
| grey60      | 3581  | MODULE_93                                     | 3   | 152  | 16101 | 44   | 7.29052  | 0.008024 |
| brown       | 799   | REGULATION_OF_SMALL_GTPASE_MEDIATED_SIGNAL    | 8   | 23   | 16230 | 2190 | 2.581378 | 0.008029 |
| brown       | 859   | HEART_DEVELOPMENT                             | 8   | 23   | 16230 | 2190 | 2.581378 | 0.008029 |
| brown       | 3110  | BIOCARTA_TPO_PATHWAY                          | 8   | 23   | 16230 | 2190 | 2.581378 | 0.008029 |
| brown       | 4227  | REACTOME_CIRCADIAN_REPRESSION_OF_EXPRESSION   | 8   | 23   | 16230 | 2190 | 2.581378 | 0.008029 |
| brown       | 4616  | REACTOME_IL_RECEPTOR_SHC_SIGNALING            | 8   | 23   | 16230 | 2190 | 2.581378 | 0.008029 |
| brown       | 7354  | SCHRAETS_MLL_TARGETS_DN                       | 8   | 23   | 16230 | 2190 | 2.581378 | 0.008029 |
| red         | 1783  | V\$CRX_Q4                                     | 13  | 188  | 16065 | 524  | 2.144805 | 0.008042 |
| red         | 9894  | GSE36392_TYPE_2_MYELOID_VS_NEUTROPHIL_IL25_TI | 13  | 188  | 16065 | 524  | 2.144805 | 0.008042 |
| red         | 4489  | REACTOME_G_ALPHA_I_SIGNALLING_EVENTS          | 10  | 127  | 16126 | 524  | 2.442297 | 0.008048 |
| yellow      | 1306  | NUCLEOBASENUCLEOSIDENUCLEOTIDE_AND_NUCLEIC    | 4   | 10   | 16243 | 1426 | 4.559046 | 0.008048 |
| yellow      | 7659  | CAIRO_HEPATOBLASTOMA_POOR_SURVIVAL            | 4   | 10   | 16243 | 1426 | 4.559046 | 0.008048 |
| turquoise   | 6394  | IVANOVA_HEMATOPOIESIS_EARLY_PROGENITOR        | 150 | 492  | 15761 | 4169 | 1.188578 | 0.00805  |
| magenta     | 8799  | GSE15930_STIM_VS_STIM_AND_IFNAB_24H_CD8_T_C   | 6   | 169  | 16084 | 167  | 3.455267 | 0.008051 |
| magenta     | 10249 | GSE9037_WT_VS_IRAK4_KO_BMDM_DN                | 6   | 169  | 16084 | 167  | 3.455267 | 0.008051 |
| brown       | 7630  | STEIN_ESRRA_TARGETS                           | 88  | 510  | 15743 | 2190 | 1.280566 | 0.008052 |
| blue        | 4507  | REACTOME_CD28_DEPENDENT_PI3K_AKT_SIGNALING    | 9   | 21   | 16232 | 2978 | 2.33901  | 0.008059 |
| midnightb   | 3236  | chr13q34                                      | 2   | 31   | 16222 | 71   | 14.76874 | 0.008062 |
| blue        | 4347  | REACTOME_RNA_POL_II_TRANSCRIPTION             | 29  | 102  | 16151 | 2978 | 1.551696 | 0.008075 |
| blue        | 4819  | WATANABE_RECTAL_CANCER_RADIOOTHERAPY_RESPON   | 29  | 102  | 16151 | 2978 | 1.551696 | 0.008075 |
| blue        | 924   | RNA_SPLICING                                  | 26  | 89   | 16164 | 2978 | 1.594381 | 0.008082 |
| midnightb   | 9467  | GSE25087_FETAL_VS_ADULT_TCONV_DN              | 4   | 181  | 16072 | 71   | 5.058906 | 0.008096 |
| midnightb   | 9693  | GSE29618_PRE_VS_DAY7_POST_TIV_FLU_VACCINE_MC  | 4   | 181  | 16072 | 71   | 5.058906 | 0.008096 |
| lightyellow | 2928  | BIOCARTA_NEUROTRANSMITTERS_PATHWAY            | 1   | 4    | 16249 | 33   | 123.1288 | 0.008098 |

|             |                                                   |     |      |       |      |          |          |
|-------------|---------------------------------------------------|-----|------|-------|------|----------|----------|
| lightyellow | 6967 WALLACE_PROSTATE_CANCER_DN                   | 1   | 4    | 16249 | 33   | 123.1288 | 0.008098 |
| purple      | 1470 V\$RSRFC4_01                                 | 6   | 180  | 16073 | 157  | 3.450743 | 0.008099 |
| purple      | 9418 GSE24142_DN2_VS_DN3_THYMOCYTE_ADULT_UP       | 6   | 180  | 16073 | 157  | 3.450743 | 0.008099 |
| brown       | 825 POSITIVE_REGULATION_OF_BIOLOGICAL_PROCESS     | 104 | 616  | 15637 | 2190 | 1.252974 | 0.008099 |
| red         | 5912 BENPORATH_PROLIFERATION                      | 11  | 147  | 16106 | 524  | 2.321013 | 0.008109 |
| tan         | 8722 GSE14769_UNSTIM_VS_120MIN_LPS_BMDM_UP        | 6   | 195  | 16058 | 145  | 3.448912 | 0.008113 |
| magenta     | 1969 TACTTGA,MIR-26A,MIR-26B                      | 8   | 278  | 15975 | 167  | 2.800672 | 0.008113 |
| lightgreen  | 8380 LEF1_UP.V1_DN                                | 3   | 160  | 16093 | 42   | 7.255804 | 0.008115 |
| lightcyan   | 8313 RB_DN.V1_DN                                  | 3   | 108  | 16145 | 62   | 7.28181  | 0.008122 |
| magenta     | 5249 GAUSSMANN_MLL_AF4_FUSION_TARGETS_E_UP        | 4   | 77   | 16176 | 167  | 5.055759 | 0.008134 |
| magenta     | 7715 MIKKELSEN_ES_ICP_WITH_H3K4ME3_AND_H3K27ME3   | 4   | 77   | 16176 | 167  | 5.055759 | 0.008134 |
| yellow      | 2220 YGCGYRCGC_UNKNOWN                            | 38  | 290  | 15963 | 1426 | 1.493481 | 0.008144 |
| cyan        | 5920 BENPORATH_ES_CORE_NINE_CORRELATED            | 3   | 87   | 16166 | 77   | 7.278549 | 0.008149 |
| purple      | 5906 BENPORATH_EED_TARGETS                        | 13  | 630  | 15623 | 157  | 2.136174 | 0.00815  |
| grey60      | 931 RESPONSE_TO_WOUNDING                          | 3   | 153  | 16100 | 44   | 7.24287  | 0.008169 |
| grey60      | 9684 GSE29618_PRE_VS_DAY7_FLU_VACCINE_MDC_UP      | 3   | 153  | 16100 | 44   | 7.24287  | 0.008169 |
| turquoise   | 9226 GSE18791_CTRL_VS_NEWCASTLE_VIRUS_DC_8H_UP    | 66  | 197  | 16056 | 4169 | 1.306109 | 0.008174 |
| turquoise   | 9253 GSE19825_CD24LOW_VS_IL2RA_HIGH_DAY3_EFF_CD8  | 66  | 197  | 16056 | 4169 | 1.306109 | 0.008174 |
| turquoise   | 9306 GSE22886_CD8_VS_CD4_NAIVE_TCELL_UP           | 66  | 197  | 16056 | 4169 | 1.306109 | 0.008174 |
| turquoise   | 9401 GSE22886_UNSTIM_VS_IL15_STIM_NKCELL_DN       | 66  | 197  | 16056 | 4169 | 1.306109 | 0.008174 |
| turquoise   | 9586 GSE27786_CD4_TCELL_VS_MONO_MAC_UP            | 66  | 197  | 16056 | 4169 | 1.306109 | 0.008174 |
| turquoise   | 6979 IWANAGA_CARCIANOGENESIS_BY_KRAS_UP           | 50  | 143  | 16110 | 4169 | 1.363125 | 0.008177 |
| brown       | 4684 REACTOME_METABOLISM_OF_CARBOHYDRATES         | 39  | 197  | 16056 | 2190 | 1.469223 | 0.008178 |
| brown       | 8507 GSE12845_IGD_POS_BLOOD_VS_NAIVE_TONSIL_BCELL | 39  | 197  | 16056 | 2190 | 1.469223 | 0.008178 |
| brown       | 8618 GSE14000_UNSTIM_VS_4H_LPS_DC_UP              | 39  | 197  | 16056 | 2190 | 1.469223 | 0.008178 |
| brown       | 9764 GSE3337_4H_VS_16H_IFNG_IN_CD8POS_DC_UP       | 39  | 197  | 16056 | 2190 | 1.469223 | 0.008178 |
| brown       | 10232 GSE9006_TYPE_1_DIABETES_AT_DX_VS_1MONTH_POS | 39  | 197  | 16056 | 2190 | 1.469223 | 0.008178 |
| purple      | 8320 CAHOY_ASTROGLIAL                             | 4   | 82   | 16171 | 157  | 5.049868 | 0.00818  |
| blue        | 10265 GSE9650_EXHAUSTED_VS_MEMORY_CD8_TCELL_DN    | 50  | 197  | 16056 | 2978 | 1.3852   | 0.008186 |
| pink        | 670 SYNAPSE_ORGANIZATION_AND_BIOGENESIS           | 2   | 10   | 16243 | 228  | 14.25702 | 0.008187 |
| pink        | 684 HEME_BIOSYNTHETIC_PROCESS                     | 2   | 10   | 16243 | 228  | 14.25702 | 0.008187 |
| pink        | 2961 BIOCARTA_SKP2E2F_PATHWAY                     | 2   | 10   | 16243 | 228  | 14.25702 | 0.008187 |
| pink        | 3734 MODULE_272                                   | 2   | 10   | 16243 | 228  | 14.25702 | 0.008187 |
| blue        | 7922 PILON_KLF1_TARGETS_DN                        | 397 | 1952 | 14301 | 2978 | 1.109991 | 0.008209 |
| black       | 2283 GGGCGGR_V\$SP1_Q6                            | 62  | 2655 | 13598 | 283  | 1.34114  | 0.008211 |
| greenyello  | 6993 DE_YY1_TARGETS_UP                            | 2   | 15   | 16238 | 150  | 14.44711 | 0.008211 |
| salmon      | 4412 REACTOME_P53_DEPENDENT_G1_DNA_DAMAGE_RESI    | 3   | 53   | 16200 | 127  | 7.243946 | 0.008213 |
| greenyello  | 8773 GSE15750_DAY6_VS_DAY10_TRAF6KO_EFF_CD8_TCELL | 6   | 189  | 16064 | 150  | 3.439788 | 0.008217 |
| greenyello  | 8827 GSE17580_TREG_VS_TEFF_S_MANSONI_INF_DN       | 6   | 189  | 16064 | 150  | 3.439788 | 0.008217 |
| purple      | 5121 GRAHAM_CML QUIESCENT_VS_NORMAL QUIESCENT_    | 3   | 43   | 16210 | 157  | 7.222486 | 0.008225 |
| purple      | 5363 OLSSON_E2F3_TARGETS_DN                       | 3   | 43   | 16210 | 157  | 7.222486 | 0.008225 |
| brown       | 1945 GGGNRMNNYCAT_UNKNOWN                         | 18  | 74   | 16179 | 2190 | 1.80522  | 0.008234 |
| turquoise   | 6703 BAELDE_DIABETIC_NEPHROPATHY_DN               | 123 | 396  | 15857 | 4169 | 1.210909 | 0.008246 |
| midnightb   | 8462 GSE11864_UNTREATED_VS_CSF1_IFNG_IN_MAC_UP    | 4   | 182  | 16071 | 71   | 5.03111  | 0.008251 |
| midnightb   | 9910 GSE36476_CTRL_VS_TSST_ACT_40H_MEMORY_CD4_T   | 4   | 182  | 16071 | 71   | 5.03111  | 0.008251 |
| lightgreen  | 9643 GSE29615_DAY3_VS_DAY7_LAIV_FLU_VACCINE_PBMC  | 3   | 161  | 16092 | 42   | 7.210736 | 0.008254 |
| brown       | 8499 GSE12366_PLASMA_CELL_VS_NAIVE_BCELL_DN       | 38  | 191  | 16062 | 2190 | 1.476521 | 0.008255 |
| brown       | 8675 GSE14350_IL2RB_KO_VS_WT_TREG_DN              | 38  | 191  | 16062 | 2190 | 1.476521 | 0.008255 |
| brown       | 9350 GSE22886_DAY1_VS_DAY7_MONOCYTE_IN_CULTURE_   | 38  | 191  | 16062 | 2190 | 1.476521 | 0.008255 |
| salmon      | 6227 FLECHNER_BIOPSY_KIDNEY_TRANSPLANT_OK_VS_DON  | 10  | 526  | 15727 | 127  | 2.433011 | 0.008255 |
| salmon      | 8001 FEVR_CTNNB1_TARGETS_DN                       | 10  | 526  | 15727 | 127  | 2.433011 | 0.008255 |
| turquoise   | 251 PROTEIN_FOLDING                               | 23  | 56   | 16197 | 4169 | 1.601185 | 0.008262 |
| turquoise   | 3709 MODULE_237                                   | 23  | 56   | 16197 | 4169 | 1.601185 | 0.008262 |
| turquoise   | 4717 REACTOME_AUTODEGRADATION_OF_CDH1_BY_CDH1_    | 23  | 56   | 16197 | 4169 | 1.601185 | 0.008262 |
| lightgreen  | 1023 REGULATION_OF_BINDING                        | 2   | 53   | 16200 | 42   | 14.60288 | 0.008264 |
| magenta     | 9625 GSE2826_WT_VS_XID_BCELL_DN                   | 6   | 170  | 16083 | 167  | 3.434942 | 0.008277 |
| magenta     | 9628 GSE2826_XID_VS_BTK_KO_BCELL_UP               | 6   | 170  | 16083 | 167  | 3.434942 | 0.008277 |
| cyan        | 292 JAK_STAT_CASCADE                              | 2   | 29   | 16224 | 77   | 14.5571  | 0.00828  |
| cyan        | 6804 KIM_LRRC3B_TARGETS                           | 2   | 29   | 16224 | 77   | 14.5571  | 0.00828  |
| yellow      | 3637 MODULE_152                                   | 19  | 120  | 16133 | 1426 | 1.804622 | 0.008282 |

|             |                                                    |    |     |       |      |          |          |
|-------------|----------------------------------------------------|----|-----|-------|------|----------|----------|
| red         | 2245 TGACCTY_V\$ERR1_Q2                            | 41 | 862 | 15391 | 524  | 1.475295 | 0.008285 |
| lightcyan   | 6407 BROWNE_HCMV_INFECTION_16HR_UP                 | 4  | 209 | 16044 | 62   | 5.017132 | 0.008286 |
| lightcyan   | 2716 GNF2_VAV1                                     | 2  | 36  | 16217 | 62   | 14.56362 | 0.008298 |
| lightcyan   | 6486 SATO_SILENCED_BY_METHYLATION_IN_PANCREATIC_C  | 2  | 36  | 16217 | 62   | 14.56362 | 0.008298 |
| lightcyan   | 6721 KAAB_FAILED_HEART_VENTRICLE_DN                | 2  | 36  | 16217 | 62   | 14.56362 | 0.008298 |
| lightcyan   | 7901 OHGUCHI_LIVER_HNF4A_TARGETS_UP                | 2  | 36  | 16217 | 62   | 14.56362 | 0.008298 |
| magenta     | 1908 V\$GR_Q6_01                                   | 7  | 223 | 16030 | 167  | 3.054993 | 0.008302 |
| magenta     | 6778 MCLACHLAN_DENTAL_CARIES_UP                    | 7  | 223 | 16030 | 167  | 3.054993 | 0.008302 |
| red         | 2238 TTGCWCAAY_V\$CEBPB_02                         | 6  | 55  | 16198 | 524  | 3.383692 | 0.008304 |
| red         | 3723 MODULE_254                                    | 6  | 55  | 16198 | 524  | 3.383692 | 0.008304 |
| red         | 3749 MODULE_291                                    | 6  | 55  | 16198 | 524  | 3.383692 | 0.008304 |
| tan         | 8623 GSE14000_4H_VS_16H_LPS_DC_TRANSLATED_RNA_DN   | 6  | 196 | 16057 | 145  | 3.431316 | 0.008309 |
| purple      | 2191 SYATTGTG_UNKNOWN                              | 6  | 181 | 16072 | 157  | 3.431678 | 0.008312 |
| lightyellow | 5906 BENPORATH_EED_TARGETS                         | 5  | 630 | 15623 | 33   | 3.90885  | 0.008313 |
| pink        | 8370 KRAS.BREAST_UP.V1_DN                          | 5  | 89  | 16164 | 228  | 4.00478  | 0.008315 |
| lightcyan   | 6467 WANG_SMARCE1_TARGETS_DN                       | 5  | 329 | 15924 | 62   | 3.983969 | 0.008316 |
| brown       | 8784 GSE15930_NAIVE_VS_48H_IN_VITRO_STIM_IL12_CD8_ | 37 | 185 | 16068 | 2190 | 1.484292 | 0.008322 |
| salmon      | 1537 V\$MYCMAX_02                                  | 6  | 224 | 16029 | 127  | 3.427939 | 0.008324 |
| blue        | 2560 GCM_TPR                                       | 12 | 32  | 16221 | 2978 | 2.046634 | 0.008333 |
| red         | 9815 GSE360_CTRL_VS_M_TUBERCULOSIS_MAC_DN          | 12 | 168 | 16085 | 524  | 2.215513 | 0.008344 |
| purple      | 3588 MODULE_100                                    | 10 | 425 | 15828 | 157  | 2.435819 | 0.008345 |
| yellow      | 8323 RPS14_DN.V1_DN                                | 25 | 172 | 16081 | 1426 | 1.65663  | 0.008353 |
| red         | 6890 FOSTER_TOLERANT_MACROPHAGE_DN                 | 22 | 391 | 15862 | 524  | 1.745212 | 0.008365 |
| turquoise   | 8171 SMIRNOV_RESPONSE_TO_IR_2HR_DN                 | 22 | 53  | 16200 | 4169 | 1.618261 | 0.008374 |
| black       | 5998 NIKOLSKY_BREAST_CANCER_8Q23_Q24_AMPLICON      | 7  | 132 | 16121 | 283  | 3.045588 | 0.008381 |
| turquoise   | 767 REGULATION_OF_CYCLIN_DEPENDENT_PROTEIN_KINASE  | 18 | 41  | 16212 | 4169 | 1.711553 | 0.008386 |
| red         | 8827 GSE17580_TREG_VS_TEFF_S_MANSONI_INF_DN        | 13 | 189 | 16064 | 524  | 2.133457 | 0.008391 |
| red         | 8998 GSE17721_LPS_VS_PAM3CSK4_16H_BMDM_UP          | 13 | 189 | 16064 | 524  | 2.133457 | 0.008391 |
| red         | 9461 GSE24634_IL4_VS_CTRL_TREATED_NAIVE_CD4_TCELL_ | 13 | 189 | 16064 | 524  | 2.133457 | 0.008391 |
| red         | 10080 GSE3982_BASOPHIL_VS_TH2_UP                   | 13 | 189 | 16064 | 524  | 2.133457 | 0.008391 |
| red         | 10179 GSE7460_WT_VS_FOXP3_HET_ACT_TCONV_DN         | 13 | 189 | 16064 | 524  | 2.133457 | 0.008391 |
| lightgreen  | 5016 TAKEDA_TARGETS_OF_NUP98_HOXA9_FUSION_16D_L    | 3  | 162 | 16091 | 42   | 7.166226 | 0.008395 |
| lightgreen  | 9421 GSE24142_EARLY_THYMIC_PROGENITOR_VS_DN2_THY   | 3  | 162 | 16091 | 42   | 7.166226 | 0.008395 |
| lightgreen  | 9766 GSE33513_TCF7_KO_VS_HET_EARLY_THYMIC_PROGEN   | 3  | 162 | 16091 | 42   | 7.166226 | 0.008395 |
| turquoise   | 8650 GSE14308_TH17_VS_NATURAL_TREG_UP              | 63 | 187 | 16066 | 4169 | 1.313411 | 0.0084   |
| turquoise   | 9595 GSE27786_CD8_TCELL_VS_NEUTROPHIL_DN           | 63 | 187 | 16066 | 4169 | 1.313411 | 0.0084   |
| turquoise   | 9617 GSE27786_NEUTROPHIL_VS_MONO_MAC_DN            | 63 | 187 | 16066 | 4169 | 1.313411 | 0.0084   |
| blue        | 256 NEGATIVE_REGULATION_OF_NUCLEOBASENUCLEOSIDE    | 48 | 188 | 16065 | 2978 | 1.393453 | 0.008403 |
| midnightb   | 8699 GSE1460_DP_THYMOCYTE_VS_NAIVE_CD4_TCELL_ADL   | 4  | 183 | 16070 | 71   | 5.003617 | 0.008408 |
| brown       | 5859 SCHAEFFER_PROSTATE_DEVELOPMENT_6HR_DN         | 83 | 478 | 15775 | 2190 | 1.288664 | 0.00841  |
| brown       | 1799 V\$MAZ_Q6                                     | 35 | 173 | 16080 | 2190 | 1.501452 | 0.008422 |
| greenyello  | 8445 GSE11057_NAIVE_VS_EFF_MEMORY_CD4_TCELL_DN     | 6  | 190 | 16063 | 150  | 3.421684 | 0.008422 |
| greenyello  | 9266 GSE20366_EX_VIVO_VS_DEC205_CONVERSION_NAIVE_  | 6  | 190 | 16063 | 150  | 3.421684 | 0.008422 |
| turquoise   | 2636 GNF2_DENR                                     | 21 | 50  | 16203 | 4169 | 1.637385 | 0.008452 |
| turquoise   | 3255 chr4q31                                       | 21 | 50  | 16203 | 4169 | 1.637385 | 0.008452 |
| brown       | 8328 IL2_UP.V1_UP                                  | 33 | 161 | 16092 | 2190 | 1.521169 | 0.008465 |
| turquoise   | 533 JNK_CASCADE                                    | 19 | 44  | 16209 | 4169 | 1.683459 | 0.008468 |
| turquoise   | 2795 KEGG_PROTEASOME                               | 19 | 44  | 16209 | 4169 | 1.683459 | 0.008468 |
| blue        | 5399 DACOSTA_UV_RESPONSE_VIA_ERCC3_XPCS_DN         | 25 | 85  | 16168 | 2978 | 1.605203 | 0.008469 |
| cyan        | 8903 GSE17721_CTRL_VS_GARDIQUIMOD_4H_BMDM_DN       | 4  | 169 | 16084 | 77   | 4.995927 | 0.008474 |
| cyan        | 9962 GSE3982_MEMORY_CD4_TCELL_VS_BCELL_UP          | 4  | 169 | 16084 | 77   | 4.995927 | 0.008474 |
| purple      | 3625 MODULE_137                                    | 10 | 426 | 15827 | 157  | 2.430101 | 0.008476 |
| pink        | 6172 FERNANDEZ_BOUND_BY_MYC                        | 7  | 164 | 16089 | 228  | 3.042656 | 0.008476 |
| brown       | 2987 BIOCARTA_HIVNEF_PATHWAY                       | 15 | 58  | 16195 | 2190 | 1.919343 | 0.008485 |
| turquoise   | 497 MEMBRANE_LIPID_BIOSYNTHETIC_PROCESS            | 20 | 47  | 16206 | 4169 | 1.658952 | 0.008486 |
| turquoise   | 4529 REACTOME_AUTODEGRADATION_OF_THE_E3_UBIQUITI   | 20 | 47  | 16206 | 4169 | 1.658952 | 0.008486 |
| yellow      | 8939 GSE17721_POLYIC_VS_PAM3CSK4_6H_BMDM_DN        | 27 | 190 | 16063 | 1426 | 1.619661 | 0.008486 |
| blue        | 3326 chr21q22                                      | 33 | 120 | 16133 | 2978 | 1.500865 | 0.008506 |
| yellow      | 8783 GSE15930_NAIVE_VS_48H_IN_VITRO_STIM_CD8_TCELL | 28 | 199 | 16054 | 1426 | 1.603685 | 0.008507 |
| red         | 10067 GSE3982_BCELL_VS_NKCELL_DN                   | 11 | 148 | 16105 | 524  | 2.305331 | 0.008515 |



|             |                                                    |    |     |       |      |          |          |
|-------------|----------------------------------------------------|----|-----|-------|------|----------|----------|
| magenta     | 3654 MODULE_171                                    | 5  | 122 | 16131 | 167  | 3.988662 | 0.008524 |
| purple      | 1645 V\$LMO2COM_02                                 | 6  | 182 | 16071 | 157  | 3.412823 | 0.008528 |
| purple      | 7856 VERHAAK_GLIOMASTOMA_CLASSICAL                 | 6  | 182 | 16071 | 157  | 3.412823 | 0.008528 |
| magenta     | 3965 PID_NFAT_TFPATHWAY                            | 3  | 41  | 16212 | 167  | 7.121221 | 0.008532 |
| magenta     | 6213 BECKER_TAMOXIFEN_RESISTANCE_DN                | 3  | 41  | 16212 | 167  | 7.121221 | 0.008532 |
| lightgreen  | 9265 GSE20366_EX_VIVO_VS_HOMEOSTATIC_CONVERSION_   | 3  | 163 | 16090 | 42   | 7.122261 | 0.008537 |
| lightcyan   | 735 CELLULAR_HOMEOSTASIS                           | 3  | 110 | 16143 | 62   | 7.149413 | 0.00854  |
| turquoise   | 67 ENDOPLASMIC_RETICULUM_MEMBRANE                  | 30 | 78  | 16175 | 4169 | 1.499437 | 0.008564 |
| turquoise   | 2019 GTGTTGA,MIR-505                               | 35 | 94  | 16159 | 4169 | 1.451583 | 0.008564 |
| midnightb   | 8539 GSE13306_TREG_VS_TCONV_DN                     | 4  | 184 | 16069 | 71   | 4.976424 | 0.008567 |
| midnightb   | 9204 GSE17974_0.5H_VS_72H_UNTREATED_IN_VITRO_CD4_  | 4  | 184 | 16069 | 71   | 4.976424 | 0.008567 |
| green       | 4454 REACTOME_CLASS_C_3_METABOTROPIC_Glutamate_    | 3  | 6   | 16247 | 1305 | 6.227203 | 0.008585 |
| green       | 7081 GALI_TP53_TARGETS_APOPTOTIC_DN                | 3  | 6   | 16247 | 1305 | 6.227203 | 0.008585 |
| midnightb   | 5703 HATADA_METHYLATED_IN_LUNG_CANCER_UP           | 5  | 289 | 15964 | 71   | 3.960476 | 0.0086   |
| blue        | 9871 GSE360_L_MAJOR_VS_T_GONDII_MAC_DN             | 46 | 179 | 16074 | 2978 | 1.402535 | 0.008603 |
| turquoise   | 8523 GSE12845_PRE_GC_VS_DARKZONE_GC_TONSIL_BCELL_  | 65 | 194 | 16059 | 4169 | 1.306211 | 0.008603 |
| green       | 9529 GSE27786_LSK_VS_LIN_NEG_CELL_DN               | 25 | 188 | 16065 | 1305 | 1.656171 | 0.008607 |
| grey60      | 8336 TGFB_UP.V1_UP                                 | 3  | 156 | 16097 | 44   | 7.103584 | 0.008614 |
| lightyellow | 3440 chr15q21                                      | 2  | 69  | 16184 | 33   | 14.2758  | 0.008615 |
| lightyellow | 5008 TAKEDA_TARGETS_OF_NUP98_HOXA9_FUSION_6HR_L    | 2  | 69  | 16184 | 33   | 14.2758  | 0.008615 |
| lightyellow | 5375 TANAKA_METHYLATED_IN_ESOPHAGEAL_CARCINOMA     | 2  | 69  | 16184 | 33   | 14.2758  | 0.008615 |
| green       | 689 REGULATED_SECRETORY_PATHWAY                    | 4  | 11  | 16242 | 1305 | 4.528875 | 0.008628 |
| green       | 742 APOPTOTIC_MITOCHONDRIAL_CHANGES                | 4  | 11  | 16242 | 1305 | 4.528875 | 0.008628 |
| green       | 7793 NIELSEN_SCHWANNOMA_DN                         | 4  | 11  | 16242 | 1305 | 4.528875 | 0.008628 |
| greenyello  | 8367 KRAS.600_UP.V1_UP                             | 6  | 191 | 16062 | 150  | 3.40377  | 0.008631 |
| greenyello  | 8831 GSE17580_UNINFECTED_VS_S_MANSONI_INF_TREG_D   | 6  | 191 | 16062 | 150  | 3.40377  | 0.008631 |
| greenyello  | 10194 GSE7852_TREG_VS_TCONV_THYMUS_UP              | 6  | 191 | 16062 | 150  | 3.40377  | 0.008631 |
| salmon      | 4515 REACTOME_CDT1_ASSOCIATION_WITH_THE_CDC6_OR    | 3  | 54  | 16199 | 127  | 7.109799 | 0.008647 |
| grey60      | 7725 MIKKELSEN_MEF_HCP_WITH_H3K27ME3               | 4  | 300 | 15953 | 44   | 4.925152 | 0.008647 |
| pink        | 6953 MARTINEZ_RB1_TARGETS_UP                       | 16 | 586 | 15667 | 228  | 1.946351 | 0.008653 |
| red         | 74 VESICLE                                         | 9  | 109 | 16144 | 524  | 2.561051 | 0.00866  |
| lightgreen  | 10003 GSE3982_MAST_CELL_VS_EFF_MEMORY_CD4_TCELL_ [ | 3  | 164 | 16089 | 42   | 7.078833 | 0.008681 |
| lightgreen  | 10088 GSE3982_EFF_MEMORY_CD4_TCELL_VS_TH2_UP       | 3  | 164 | 16089 | 42   | 7.078833 | 0.008681 |
| magenta     | 1602 V\$NFkB_C                                     | 7  | 225 | 16028 | 167  | 3.027838 | 0.008697 |
| brown       | 6936 HELLER_HDAC_TARGETS_SILENCED_BY_METHYLATION_  | 68 | 381 | 15872 | 2190 | 1.324565 | 0.008726 |
| midnightb   | 9882 GSE360_T_GONDII_VS_M_TUBERCULOSIS_MAC_UP      | 4  | 185 | 16068 | 71   | 4.949524 | 0.008728 |
| midnightb   | 10051 GSE3982_NEUTROPHIL_VS_EFF_MEMORY_CD4_TCELL_  | 4  | 185 | 16068 | 71   | 4.949524 | 0.008728 |
| blue        | 9788 GSE34205_HEALTHY_VS_FLU_INF_INFANT_PBMC_UP    | 49 | 193 | 16060 | 2978 | 1.385631 | 0.008728 |
| lightcyan   | 4967 WANG_LMO4_TARGETS_DN                          | 5  | 333 | 15920 | 62   | 3.936114 | 0.008736 |
| tan         | 2675 GNF2_MYL2                                     | 2  | 16  | 16237 | 145  | 14.01121 | 0.008739 |
| magenta     | 8120 FOSTER_KDM1A_TARGETS_UP                       | 6  | 172 | 16081 | 167  | 3.395001 | 0.008741 |
| magenta     | 10257 GSE9650_NAIVE_VS_EXHAUSTED_CD8_TCELL_DN      | 6  | 172 | 16081 | 167  | 3.395001 | 0.008741 |
| purple      | 5045 TONKS_TARGETS_OF_RUNX1_RUNX1T1_FUSION_HSC_    | 6  | 183 | 16070 | 157  | 3.394174 | 0.008749 |
| lightcyan   | 6153 ZUCCHI_METASTASIS_UP                          | 2  | 37  | 16216 | 62   | 14.17001 | 0.008751 |
| greenyello  | 2887 KEGG_BASAL_CELL_CARCINOMA                     | 3  | 46  | 16207 | 150  | 7.066522 | 0.008751 |
| red         | 8410 GSE10239_NAIVE_VS_KLRG1HIGH_EFF_CD8_TCELL_UP  | 13 | 190 | 16063 | 524  | 2.122228 | 0.008752 |
| red         | 8607 GSE13738_TCR_VS_BYSTANDER_ACTIVATED_CD4_TCEI  | 13 | 190 | 16063 | 524  | 2.122228 | 0.008752 |
| purple      | 1563 V\$SRF_01                                     | 3  | 44  | 16209 | 157  | 7.058338 | 0.008765 |
| purple      | 3648 MODULE_164                                    | 3  | 44  | 16209 | 157  | 7.058338 | 0.008765 |
| purple      | 4930 CHARAFE_BREAST_CANCER_BASAL_VS_MESENCHYMAI    | 3  | 44  | 16209 | 157  | 7.058338 | 0.008765 |
| purple      | 5456 LINDGREN_BLADDER_CANCER_HIGH_RECURRENCE       | 3  | 44  | 16209 | 157  | 7.058338 | 0.008765 |
| purple      | 5618 TSUNODA_CISPLATIN_RESISTANCE_DN               | 3  | 44  | 16209 | 157  | 7.058338 | 0.008765 |
| purple      | 6664 BURTON_ADIPOGENESIS_7                         | 3  | 44  | 16209 | 157  | 7.058338 | 0.008765 |
| turquoise   | 6998 POS_RESPONSE_TO_HISTAMINE_DN                  | 7  | 11  | 16242 | 4169 | 2.480887 | 0.008774 |
| turquoise   | 7805 ONGUSAHA_BRCA1_TARGETS_DN                     | 7  | 11  | 16242 | 4169 | 2.480887 | 0.008774 |
| turquoise   | 8053 PEDERSEN_METASTASIS_BY_ERBB2_ISOFORM_5        | 7  | 11  | 16242 | 4169 | 2.480887 | 0.008774 |
| brown       | 4678 REACTOME_ETHANOL_OXIDATION                    | 3  | 4   | 16249 | 2190 | 5.566096 | 0.008788 |
| purple      | 4866 DAVICIONI_MOLECULAR_ARMS_VS_ERMS_UP           | 8  | 300 | 15953 | 157  | 2.760594 | 0.008791 |
| magenta     | 347 DEVELOPMENTAL_MATURATION                       | 2  | 14  | 16239 | 167  | 13.90334 | 0.008806 |
| magenta     | 810 REGULATION_OF_T_CELL_PROLIFERATION             | 2  | 14  | 16239 | 167  | 13.90334 | 0.008806 |

|            |      |                                               |     |      |       |      |          |          |
|------------|------|-----------------------------------------------|-----|------|-------|------|----------|----------|
| magenta    | 2908 | BIOCARTA_AMI_PATHWAY                          | 2   | 14   | 16239 | 167  | 13.90334 | 0.008806 |
| blue       | 6935 | HELLER_HDAC_TARGETS_DN                        | 66  | 273  | 15980 | 2978 | 1.319441 | 0.00882  |
| cyan       | 6316 | VERHAAK_AML_WITH_NPM1_MUTATED_UP              | 4   | 171  | 16082 | 77   | 4.937495 | 0.008824 |
| cyan       | 9847 | GSE360_L_MAJOR_VS_M_TUBERCULOSIS_DC_DN        | 4   | 171  | 16082 | 77   | 4.937495 | 0.008824 |
| lightgreen | 8335 | TGFB_UP.V1_DN                                 | 3   | 165  | 16088 | 42   | 7.035931 | 0.008826 |
| turquoise  | 8682 | GSE1448_ANTI_VALPHA2_VS_VBETA5_DP_THYMOCYTI   | 62  | 184  | 16069 | 4169 | 1.313637 | 0.008842 |
| turquoise  | 9927 | GSE37416_CTRL_VS_6H_F_TULARENSIS_LVS_NEUTROP  | 62  | 184  | 16069 | 4169 | 1.313637 | 0.008842 |
| greenyello | 1737 | V\$FOXO4_01                                   | 6   | 192  | 16061 | 150  | 3.386042 | 0.008844 |
| cyan       | 2963 | BIOCARTA_EGF_PATHWAY                          | 2   | 30   | 16223 | 77   | 14.07186 | 0.008844 |
| cyan       | 4854 | GAZDA_DIAMOND_BLACKFAN_ANEMIA_MYELOID_UP      | 2   | 30   | 16223 | 77   | 14.07186 | 0.008844 |
| cyan       | 7353 | SCHRAETS_MLL_TARGETS_UP                       | 2   | 30   | 16223 | 77   | 14.07186 | 0.008844 |
| red        | 2187 | RYTAAWNNNTGAY_UNKNOWN                         | 5   | 40   | 16213 | 524  | 3.877147 | 0.008863 |
| red        | 6105 | FLECHNER_PBL_KIDNEY_TRANSPLANT_OK_VS_DONOR    | 5   | 40   | 16213 | 524  | 3.877147 | 0.008863 |
| blue       | 4375 | REACTOME_RECRUITMENT_OF_MITOTIC_CENTROSOM     | 19  | 60   | 16193 | 2978 | 1.728268 | 0.008871 |
| lightgreen | 2655 | GNF2_ITGAL                                    | 2   | 55   | 16198 | 42   | 14.07186 | 0.008877 |
| lightgreen | 5542 | HERNANDEZ_MITOTIC_ARREST_BY_DOCETAXEL_2_UP    | 2   | 55   | 16198 | 42   | 14.07186 | 0.008877 |
| purple     | 2885 | KEGG_PROSTATE_CANCER                          | 4   | 84   | 16169 | 157  | 4.929633 | 0.008891 |
| purple     | 7149 | LABBE_TGFB1_TARGETS_UP                        | 4   | 84   | 16169 | 157  | 4.929633 | 0.008891 |
| brown      | 3943 | PID_IL4_2PATHWAY                              | 14  | 53   | 16200 | 2190 | 1.960386 | 0.008893 |
| brown      | 8670 | GSE14350_TREG_VS_TEFF_UP                      | 39  | 198  | 16055 | 2190 | 1.461803 | 0.008895 |
| salmon     | 5142 | RODRIGUES_THYROID_CARCINOMA_POORLY_DIFFEREI   | 11  | 616  | 15637 | 127  | 2.285292 | 0.008905 |
| turquoise  | 4407 | REACTOME_INSULIN_SYNTHESIS_AND_PROCESSING     | 9   | 16   | 16237 | 4169 | 2.192927 | 0.008908 |
| turquoise  | 4570 | REACTOME_ENERGY_DEPENDENT_REGULATION_OF_M     | 9   | 16   | 16237 | 4169 | 2.192927 | 0.008908 |
| turquoise  | 8883 | GSE17721_CTRL_VS_CPG_1H_BMDM_DN               | 54  | 157  | 16096 | 4169 | 1.340898 | 0.008915 |
| brown      | 5237 | GRAESSMANN_APOPTOSIS_BY_DOXORUBICIN_UP        | 171 | 1072 | 15181 | 2190 | 1.183834 | 0.00894  |
| brown      | 265  | PROTEIN_AUTOPROCESSING                        | 9   | 28   | 16225 | 2190 | 2.38547  | 0.008941 |
| brown      | 432  | PROTEIN_AMINO_ACID_AUTOPHOSPHORYLATION        | 9   | 28   | 16225 | 2190 | 2.38547  | 0.008941 |
| brown      | 3138 | chr20p12                                      | 9   | 28   | 16225 | 2190 | 2.38547  | 0.008941 |
| brown      | 7208 | CHNG_MULTIPLE_MYELOMA_HYPERPLOID_DN           | 9   | 28   | 16225 | 2190 | 2.38547  | 0.008941 |
| blue       | 9792 | GSE360_CTRL_VS_L_DONOVANI_DC_UP               | 47  | 184  | 16069 | 2978 | 1.394084 | 0.008959 |
| blue       | 9958 | GSE3982_MEMORY_CD4_TCELL_VS_TH1_UP            | 47  | 184  | 16069 | 2978 | 1.394084 | 0.008959 |
| brown      | 3508 | MODULE_16                                     | 79  | 453  | 15800 | 2190 | 1.29425  | 0.008962 |
| purple     | 169  | SECRETORY_GRANULE                             | 2   | 15   | 16238 | 157  | 13.80297 | 0.008964 |
| purple     | 3656 | MODULE_173                                    | 2   | 15   | 16238 | 157  | 13.80297 | 0.008964 |
| purple     | 3737 | MODULE_275                                    | 2   | 15   | 16238 | 157  | 13.80297 | 0.008964 |
| purple     | 5893 | HE_PTEN_TARGETS_UP                            | 2   | 15   | 16238 | 157  | 13.80297 | 0.008964 |
| purple     | 7999 | DALESSIO_TSA_RESPONSE                         | 2   | 15   | 16238 | 157  | 13.80297 | 0.008964 |
| purple     | 1909 | V\$SRF_Q5_01                                  | 6   | 184  | 16069 | 157  | 3.375727 | 0.008974 |
| purple     | 9005 | GSE17721_POLYIC_VS_CPG_1H_BMDM_DN             | 6   | 184  | 16069 | 157  | 3.375727 | 0.008974 |
| red        | 1532 | V\$CEBPB_02                                   | 14  | 212  | 16041 | 524  | 2.048304 | 0.008983 |
| brown      | 8687 | GSE1460_INTRATHYMIC_T_PROGENITOR_VS_CD4_THY   | 38  | 192  | 16061 | 2190 | 1.468831 | 0.00899  |
| brown      | 8973 | GSE17721_CPG_VS_GARDIQUIMOD_4H_BMDM_DN        | 38  | 192  | 16061 | 2190 | 1.468831 | 0.00899  |
| black      | 2276 | GGGTGRR_V\$PAX4_03                            | 30  | 1093 | 15160 | 283  | 1.576334 | 0.009    |
| cyan       | 3600 | MODULE_112                                    | 4   | 172  | 16081 | 77   | 4.908789 | 0.009002 |
| yellow     | 3565 | MODULE_77                                     | 7   | 28   | 16225 | 1426 | 2.849404 | 0.009019 |
| yellow     | 8834 | GSE17721_CTRL_VS_LPS_1H_BMDM_UP               | 26  | 182  | 16071 | 1426 | 1.628231 | 0.009045 |
| green      | 3797 | MODULE_352                                    | 5   | 17   | 16236 | 1305 | 3.663061 | 0.009048 |
| green      | 4635 | REACTOME_INHIBITION_OF_VOLTAGE_GATED_CA2_CH   | 5   | 17   | 16236 | 1305 | 3.663061 | 0.009048 |
| green      | 7564 | MEISSNER_BRAIN_HCP_WITH_H3K4ME2               | 5   | 17   | 16236 | 1305 | 3.663061 | 0.009048 |
| blue       | 8404 | GSE10094_LCMV_VS_LISTERIA_IND_EFF_CD4_TCELL_U | 50  | 198  | 16055 | 2978 | 1.378204 | 0.009048 |
| blue       | 9130 | GSE17721_0.5H_VS_8H_CPG_BMDM_UP               | 50  | 198  | 16055 | 2978 | 1.378204 | 0.009048 |
| red        | 4847 | WATANABE_COLON_CANCER_MSI_VS_MSS_DN           | 6   | 56   | 16197 | 524  | 3.323269 | 0.009054 |
| red        | 5135 | WAMUNYOKOLI_OVARIAN_CANCER_GRADES_1_2_DN      | 6   | 56   | 16197 | 524  | 3.323269 | 0.009054 |
| turquoise  | 9579 | GSE27786_CD4_TCELL_VS_NKCELL_DN               | 64  | 191  | 16062 | 4169 | 1.306316 | 0.009056 |
| red        | 6430 | IVANOVA_HEMATOPOIESIS_LATE_PROGENITOR         | 27  | 514  | 15739 | 524  | 1.629307 | 0.009059 |
| greenyello | 8606 | GSE13738_TCR_VS_BYSTANDER_ACTIVATED_CD4_TCEI  | 6   | 193  | 16060 | 150  | 3.368497 | 0.00906  |
| lightcyan  | 5657 | GRUETZMANN_PANCREATIC_CANCER_UP               | 5   | 336  | 15917 | 62   | 3.90097  | 0.00906  |
| brown      | 907  | CYTOSKELETON_ORGANIZATION_AND_BIOGENESIS      | 37  | 186  | 16067 | 2190 | 1.476312 | 0.009076 |
| brown      | 9762 | GSE3337_CTRL_VS_16H_IFNG_IN_CD8POS_DC_UP      | 37  | 186  | 16067 | 2190 | 1.476312 | 0.009076 |
| brown      | 9930 | GSE37416_CTRL_VS_24H_F_TULARENSIS_LVS_NEUTRO  | 37  | 186  | 16067 | 2190 | 1.476312 | 0.009076 |

|            |                                                    |    |      |       |      |          |          |
|------------|----------------------------------------------------|----|------|-------|------|----------|----------|
| blue       | 7521 BOYAULT_LIVER_CANCER_SUBCLASS_G123_DN         | 14 | 40   | 16213 | 2978 | 1.910191 | 0.009085 |
| red        | 1363 HEMATOPOIETIN_INTERFERON_CLASSD200_DOMAIN_I   | 4  | 26   | 16227 | 524  | 4.771873 | 0.009088 |
| red        | 5011 TAKEDA_TARGETS_OF_NUP98_HOXA9_FUSION_3D_DN    | 4  | 26   | 16227 | 524  | 4.771873 | 0.009088 |
| yellow     | 8785 GSE15930_NAIVE_VS_48H_IN_VITRO_STIM_IL12_CD8_ | 28 | 200  | 16053 | 1426 | 1.595666 | 0.009089 |
| salmon     | 4346 REACTOME_REGULATION_OF_APOPTOSIS              | 3  | 55   | 16198 | 127  | 6.98053  | 0.009094 |
| greenyello | 5012 TAKEDA_TARGETS_OF_NUP98_HOXA9_FUSION_8D_UF    | 5  | 138  | 16115 | 150  | 3.925845 | 0.009102 |
| magenta    | 1641 V\$OLF1_01                                    | 7  | 227  | 16026 | 167  | 3.001161 | 0.009105 |
| magenta    | 9254 GSE19825_NAIVE_VS_DAY3_EFF_CD8_TCELL_UP       | 5  | 124  | 16129 | 167  | 3.924329 | 0.009109 |
| magenta    | 1228 KINASE_REGULATOR_ACTIVITY                     | 3  | 42   | 16211 | 167  | 6.951668 | 0.00912  |
| red        | 9350 GSE22886_DAY1_VS_DAY7_MONOCYTE_IN_CULTURE_    | 13 | 191  | 16062 | 524  | 2.111117 | 0.009125 |
| red        | 9759 GSE32423_IL7_VS_IL7_IL4_NAIVE_CD8_TCELL_DN    | 13 | 191  | 16062 | 524  | 2.111117 | 0.009125 |
| red        | 10161 GSE7460_CD8_TCELL_VS_CD4_TCELL_ACT_DN        | 13 | 191  | 16062 | 524  | 2.111117 | 0.009125 |
| red        | 10175 GSE7460_FOXP3_MUT_VS_WT_ACT_WITH_TGFB_TCOI   | 13 | 191  | 16062 | 524  | 2.111117 | 0.009125 |
| red        | 9646 GSE29617_CTRL_VS_TIV_FLU_VACCINE_PBMIC_2008_L | 12 | 170  | 16083 | 524  | 2.189448 | 0.009126 |
| brown      | 6778 MCLACHLAN_DENTAL_CARIES_UP                    | 43 | 223  | 16030 | 2190 | 1.431044 | 0.009127 |
| purple     | 7345 RUIZ_TNC_TARGETS_UP                           | 5  | 132  | 16121 | 157  | 3.921299 | 0.009143 |
| brown      | 8780 GSE15930_NAIVE_VS_24H_IN_VITRO_STIM_INFAB_CD  | 36 | 180  | 16073 | 2190 | 1.484292 | 0.00915  |
| brown      | 131 CONTRACTILE_FIBER_PART                         | 7  | 19   | 16234 | 2190 | 2.734223 | 0.009161 |
| brown      | 336 REGULATION_OF_ANATOMICAL_STRUCTURE_MORPHC      | 7  | 19   | 16234 | 2190 | 2.734223 | 0.009161 |
| brown      | 964 REGULATION_OF_PROTEIN_SECRETION                | 7  | 19   | 16234 | 2190 | 2.734223 | 0.009161 |
| brown      | 4090 PID_ARF_3PATHWAY                              | 7  | 19   | 16234 | 2190 | 2.734223 | 0.009161 |
| brown      | 4109 PID_EPHA2_FWDPATHWAY                          | 7  | 19   | 16234 | 2190 | 2.734223 | 0.009161 |
| brown      | 6571 VERRECCHIA_RESPONSE_TO_TGFB1_C1               | 7  | 19   | 16234 | 2190 | 2.734223 | 0.009161 |
| brown      | 7005 OUYANG_PROSTATE_CANCER_PROGRESSION_UP         | 7  | 19   | 16234 | 2190 | 2.734223 | 0.009161 |
| brown      | 7283 VILIMAS_NOTCH1_TARGETS_DN                     | 7  | 19   | 16234 | 2190 | 2.734223 | 0.009161 |
| brown      | 8151 HOLLEMAN_PREDNISOLONE_RESISTANCE_ALL_DN       | 7  | 19   | 16234 | 2190 | 2.734223 | 0.009161 |
| tan        | 3786 MODULE_334                                    | 5  | 143  | 16110 | 145  | 3.919219 | 0.009165 |
| turquoise  | 1659 CCAWNWWNNNGGC_UNKNOWN                         | 28 | 72   | 16181 | 4169 | 1.516098 | 0.009168 |
| cyan       | 8963 GSE17721_PAM3CSK4_VS_CPG_16H_BMDM_DN          | 4  | 173  | 16080 | 77   | 4.880414 | 0.009183 |
| cyan       | 9052 GSE17721_LPS_VS_CPG_16H_BMDM_UP               | 4  | 173  | 16080 | 77   | 4.880414 | 0.009183 |
| lightcyan  | 4915 DIAZ_CHRONIC_MEYLOGENOUS_LEUKEMIA_DN          | 3  | 113  | 16140 | 62   | 6.959606 | 0.00919  |
| lightgreen | 1073 CARBOHYDRATE_BINDING                          | 2  | 56   | 16197 | 42   | 13.82058 | 0.009191 |
| blue       | 2299 MORF_BUB1                                     | 17 | 52   | 16201 | 2978 | 1.784245 | 0.009192 |
| turquoise  | 321 MACROMOLECULAR_COMPLEX_ASSEMBLY                | 86 | 267  | 15986 | 4169 | 1.255708 | 0.009196 |
| purple     | 9086 GSE17721_LPS_VS_GARDIQUIMOD_12H_BMDM_UP       | 6  | 185  | 16068 | 157  | 3.35748  | 0.009202 |
| midnightb  | 8432 GSE10325_LUPUS_BCELL_VS_LUPUS_MYELOID_UP      | 4  | 188  | 16065 | 71   | 4.870542 | 0.009223 |
| midnightb  | 10180 GSE7460_WT_VS_FOXP3_HET_ACT_WITH_TGFB_TCON   | 4  | 188  | 16065 | 71   | 4.870542 | 0.009223 |
| midnightb  | 10211 GSE7852_TREG_VS_TCONV_DN                     | 4  | 188  | 16065 | 71   | 4.870542 | 0.009223 |
| magenta    | 8693 GSE1460_INTRATHYMIC_T_PROGENITOR_VS_THYMIC_   | 6  | 174  | 16079 | 167  | 3.355978 | 0.009224 |
| blue       | 6641 BURTON_ADIPOGENESIS_4                         | 15 | 44   | 16209 | 2978 | 1.860576 | 0.009227 |
| yellow     | 3551 MODULE_62                                     | 15 | 88   | 16165 | 1426 | 1.942775 | 0.009231 |
| brown      | 3959 PID_PTP1BPATHWAY                              | 13 | 48   | 16205 | 2190 | 2.009979 | 0.009235 |
| brown      | 4112 PID_FGF_PATHWAY                               | 13 | 48   | 16205 | 2190 | 2.009979 | 0.009235 |
| brown      | 6253 ZHAN_MULTIPLE_MYELOMA_CD1_AND_CD2_DN          | 13 | 48   | 16205 | 2190 | 2.009979 | 0.009235 |
| turquoise  | 634 CELLULAR_COMPONENT_ASSEMBLY                    | 90 | 281  | 15972 | 4169 | 1.248642 | 0.009247 |
| turquoise  | 9395 GSE22886_NAIVE_CD4_TCELL_VS_12H_ACT_TH2_DN    | 66 | 198  | 16055 | 4169 | 1.299512 | 0.009249 |
| turquoise  | 9582 GSE27786_CD4_TCELL_VS_ERYTHROBLAST_UP         | 66 | 198  | 16055 | 4169 | 1.299512 | 0.009249 |
| turquoise  | 9989 GSE3982_EOSINOPHIL_VS_TH1_DN                  | 66 | 198  | 16055 | 4169 | 1.299512 | 0.009249 |
| purple     | 3417 chr3q21                                       | 4  | 85   | 16168 | 157  | 4.871637 | 0.009262 |
| purple     | 7872 HOELZEL_NF1_TARGETS_DN                        | 4  | 85   | 16168 | 157  | 4.871637 | 0.009262 |
| lightgreen | 8407 GSE10239_NAIVE_VS_MEMORY_CD8_TCELL_DN         | 3  | 168  | 16085 | 42   | 6.910289 | 0.009269 |
| lightgreen | 9332 GSE22886_IGA_VS_IGM_MEMORY_BCELL_UP           | 3  | 168  | 16085 | 42   | 6.910289 | 0.009269 |
| lightgreen | 9725 GSE30962_PRIMARY_VS_SECONDARY_CHRONIC_LCMV    | 3  | 168  | 16085 | 42   | 6.910289 | 0.009269 |
| black      | 2271 GATTGGY_V\$NFY_Q6_01                          | 28 | 1003 | 15250 | 283  | 1.603261 | 0.009276 |
| greenyello | 10093 GSE3982_CENT_MEMORY_CD4_TCELL_VS_TH1_DN      | 6  | 194  | 16059 | 150  | 3.351134 | 0.00928  |
| brown      | 9377 GSE22886_NAIVE_CD4_TCELL_VS_NEUTROPHIL_DN     | 33 | 162  | 16091 | 2190 | 1.511779 | 0.009292 |
| brown      | 10134 GSE6269_FLU_VS_E_COLI_INF_PBMIC_UP           | 33 | 162  | 16091 | 2190 | 1.511779 | 0.009292 |
| green      | 8329 IL21_UP.V1_DN                                 | 18 | 123  | 16130 | 1305 | 1.822596 | 0.009296 |
| turquoise  | 2162 TGTGTGA,MIR-377                               | 61 | 181  | 16072 | 4169 | 1.313872 | 0.009307 |
| turquoise  | 8446 GSE11057_NAIVE_VS_CENT_MEMORY_CD4_TCELL_UP    | 61 | 181  | 16072 | 4169 | 1.313872 | 0.009307 |

|            |                                                    |     |     |       |      |          |          |
|------------|----------------------------------------------------|-----|-----|-------|------|----------|----------|
| turquoise  | 9486 GSE26928_NAIVE_VS_EFF_MEMORY_CD4_TCELL_UP     | 61  | 181 | 16072 | 4169 | 1.313872 | 0.009307 |
| blue       | 9242 GSE18791_UNSTIM_VS_NEWCATSLE_VIRUS_DC_6H_UI   | 48  | 189 | 16064 | 2978 | 1.38608  | 0.009308 |
| magenta    | 715 NEUROLOGICAL_SYSTEM_PROCESS                    | 7   | 228 | 16025 | 167  | 2.987998 | 0.009315 |
| pink       | 9020 GSE17721_PAM3CSK4_VS_GADIQUIMOD_0.5H_BMDV     | 7   | 167 | 16086 | 228  | 2.987998 | 0.009315 |
| purple     | 4383 REACTOME_CHEMOKINE_RECEPTORS_BIND_CHEMOKII    | 3   | 45  | 16208 | 157  | 6.901486 | 0.009326 |
| purple     | 4580 REACTOME_DEPOSITION_OF_NEW_CENPA_CONTAININ    | 3   | 45  | 16208 | 157  | 6.901486 | 0.009326 |
| purple     | 5426 MIDORIKAWA_AMPLIFIED_IN_LIVER_CANCER          | 3   | 45  | 16208 | 157  | 6.901486 | 0.009326 |
| purple     | 5676 SASAI_RESISTANCE_TO_NEOPLASTIC_TRANSFROMATIC  | 3   | 45  | 16208 | 157  | 6.901486 | 0.009326 |
| greenyello | 253 AXON_GUIDANCE                                  | 2   | 16  | 16237 | 150  | 13.54417 | 0.009327 |
| greenyello | 3031 BIOCARTA_NO2IL12_PATHWAY                      | 2   | 16  | 16237 | 150  | 13.54417 | 0.009327 |
| greenyello | 3038 BIOCARTA_CCR5_PATHWAY                         | 2   | 16  | 16237 | 150  | 13.54417 | 0.009327 |
| greenyello | 5818 GUENTHER_GROWTH_SPHERICAL_VS_ADHERENT_UP      | 2   | 16  | 16237 | 150  | 13.54417 | 0.009327 |
| salmon     | 8703 GSE1460_CD4_THYMOCYTE_VS_NAIVE_CD4_TCELL_CO   | 5   | 164 | 16089 | 127  | 3.901719 | 0.009328 |
| green      | 10272 GSE9988_ANTI_TREM1_VS_ANTI_TREM1_AND_LPS_M   | 26  | 199 | 16054 | 1305 | 1.627209 | 0.009353 |
| blue       | 730 NEGATIVE_REGULATION_OF_TRANSCRIPTION           | 43  | 166 | 16087 | 2978 | 1.413739 | 0.00936  |
| red        | 1763 V\$LHX3_01                                    | 11  | 150 | 16103 | 524  | 2.274593 | 0.009372 |
| grey60     | 1693 V\$CART1_01                                   | 3   | 161 | 16092 | 44   | 6.882976 | 0.009386 |
| grey60     | 9822 GSE360_DC_VS_MAC_T_GONDII_UP                  | 3   | 161 | 16092 | 44   | 6.882976 | 0.009386 |
| midnightb  | 8553 GSE13411_NAIVE_VS_MEMORY_BCELL_DN             | 4   | 189 | 16064 | 71   | 4.844772 | 0.009392 |
| yellow     | 8250 MYC_UP.V1_UP                                  | 23  | 156 | 16097 | 1426 | 1.680418 | 0.009398 |
| brown      | 2932 BIOCARTA_CARM_ER_PATHWAY                      | 10  | 33  | 16220 | 2190 | 2.248928 | 0.009409 |
| red        | 5645 MOHANKUMAR_TLX1_TARGETS_DN                    | 10  | 130 | 16123 | 524  | 2.385937 | 0.009419 |
| lightgreen | 9962 GSE3982_MEMORY_CD4_TCELL_VS_BCELL_UP          | 3   | 169 | 16084 | 42   | 6.8694   | 0.00942  |
| turquoise  | 5084 TIEN_INTESTINE_PROBIOTICS_24HR_DN             | 68  | 205 | 16048 | 4169 | 1.293173 | 0.00942  |
| turquoise  | 5608 AMUNDSON_RESPONSE_TO_ARSENITE                 | 68  | 205 | 16048 | 4169 | 1.293173 | 0.00942  |
| cyan       | 7246 BEIER_GLIOMA_STEM_CELL_UP                     | 2   | 31  | 16222 | 77   | 13.61793 | 0.009425 |
| purple     | 9285 GSE20715_WT_VS_TLR4_KO_24H_OZONE_LUNG_DN      | 6   | 186 | 16067 | 157  | 3.339429 | 0.009435 |
| purple     | 10152 GSE7460_TCONV_VS_TREG_THYMUS_UP              | 6   | 186 | 16067 | 157  | 3.339429 | 0.009435 |
| purple     | 3555 MODULE_66                                     | 10  | 433 | 15820 | 157  | 2.390815 | 0.009441 |
| salmon     | 6117 WILLERT_WNT_SIGNALING                         | 2   | 19  | 16234 | 127  | 13.4712  | 0.009496 |
| salmon     | 7547 WANG_RECURRENT_LIVER_CANCER_UP                | 2   | 19  | 16234 | 127  | 13.4712  | 0.009496 |
| brown      | 580 ALCOHOL_METABOLIC_PROCESS                      | 18  | 75  | 16178 | 2190 | 1.781151 | 0.009503 |
| pink       | 3336 chr22q12                                      | 5   | 92  | 16161 | 228  | 3.87419  | 0.009526 |
| turquoise  | 8761 GSE15659_RESTING_VS_ACTIVATED_TREG_DN         | 58  | 171 | 16082 | 4169 | 1.322311 | 0.009532 |
| turquoise  | 9037 GSE17721_PAM3CSK4_VS_GADIQUIMOD_24H_BMDM      | 63  | 188 | 16065 | 4169 | 1.306425 | 0.009533 |
| turquoise  | 9064 GSE17721_POLYIC_VS_GARDIQUIMOD_6H_BMDM_UP     | 63  | 188 | 16065 | 4169 | 1.306425 | 0.009533 |
| turquoise  | 9647 GSE29617_CTRL_VS_TIV_FLU_VACCINE_PBMIC_2008_D | 63  | 188 | 16065 | 4169 | 1.306425 | 0.009533 |
| turquoise  | 9756 GSE32423_IL7_VS_IL4_MEMORY_CD8_TCELL_UP       | 63  | 188 | 16065 | 4169 | 1.306425 | 0.009533 |
| red        | 1650 V\$TCF11MAFG_01                               | 12  | 171 | 16082 | 524  | 2.176644 | 0.009538 |
| red        | 4368 REACTOME_CLASS_A1_RHODOPSIN_LIKE_RECEPTORS    | 12  | 171 | 16082 | 524  | 2.176644 | 0.009538 |
| red        | 5093 SABATES_COLORECTAL_ADENOMA_DN                 | 12  | 171 | 16082 | 524  | 2.176644 | 0.009538 |
| yellow     | 9190 GSE17974_IL4_AND_ANTI_IL12_VS_UNTREATED_2H_A  | 24  | 165 | 16088 | 1426 | 1.657835 | 0.009538 |
| grey60     | 1495 V\$HEN1_01                                    | 3   | 162 | 16091 | 44   | 6.840488 | 0.009546 |
| grey60     | 9258 GSE20366_TREG_VS_TCONV_UP                     | 3   | 162 | 16091 | 44   | 6.840488 | 0.009546 |
| grey60     | 9377 GSE22886_NAIVE_CD4_TCELL_VS_NEUTROPHIL_DN     | 3   | 162 | 16091 | 44   | 6.840488 | 0.009546 |
| cyan       | 9097 GSE17721_0.5H_VS_8H_LPS_BMDM_DN               | 4   | 175 | 16078 | 77   | 4.824638 | 0.009551 |
| cyan       | 9751 GSE32423_CTRL_VS_IL4_MEMORY_CD8_TCELL_DN      | 4   | 175 | 16078 | 77   | 4.824638 | 0.009551 |
| cyan       | 10282 GSE9988_LPS_VS_CTRL_TREATED_MONOCYTE_UP      | 4   | 175 | 16078 | 77   | 4.824638 | 0.009551 |
| blue       | 8967 GSE17721_CPG_VS_GARDIQUIMOD_0.5H_BMDM_DN      | 46  | 180 | 16073 | 2978 | 1.394743 | 0.009552 |
| brown      | 3002 BIOCARTA_IL2RB_PATHWAY                        | 11  | 38  | 16215 | 2190 | 2.148318 | 0.009554 |
| brown      | 3966 PID_EPHBFWDPATHWAY                            | 11  | 38  | 16215 | 2190 | 2.148318 | 0.009554 |
| brown      | 4079 PID_ECADHERIN_STABILIZATION_PATHWAY           | 11  | 38  | 16215 | 2190 | 2.148318 | 0.009554 |
| brown      | 6863 MARSON_BOUND_BY_FOXP3_STIMULATED              | 157 | 978 | 15275 | 2190 | 1.19138  | 0.009555 |
| salmon     | 4717 REACTOME_AUTODEGRADATION_OF_CDH1_BY_CDH1      | 3   | 56  | 16197 | 127  | 6.855877 | 0.009555 |
| midnightb  | 8691 GSE1460_INTRATHYMIC_T_PROGENITOR_VS_NAIVE_CI  | 4   | 190 | 16063 | 71   | 4.819274 | 0.009563 |
| midnightb  | 9908 GSE36476_CTRL_VS_TSST_ACT_16H_MEMORY_CD4_T    | 4   | 190 | 16063 | 71   | 4.819274 | 0.009563 |
| midnightb  | 10019 GSE3982_DC_VS_BASOPHIL_DN                    | 4   | 190 | 16063 | 71   | 4.819274 | 0.009563 |
| midnightb  | 10274 GSE9988_ANTI_TREM1_VS_CTRL_TREATED_MONOCYT   | 4   | 190 | 16063 | 71   | 4.819274 | 0.009563 |
| purple     | 3549 MODULE_60                                     | 9   | 368 | 15885 | 157  | 2.531795 | 0.009568 |
| lightcyan  | 7395 LEE_RECENT_THYMIC_EMIGRANT                    | 4   | 218 | 16035 | 62   | 4.810003 | 0.009574 |

|             |       |                                               |     |     |       |      |          |          |
|-------------|-------|-----------------------------------------------|-----|-----|-------|------|----------|----------|
| blue        | 1285  | DNA_POLYMERASE_ACTIVITY                       | 8   | 18  | 16235 | 2978 | 2.42564  | 0.009576 |
| blue        | 1454  | INOSITOL_OR_PHOSPHATIDYLINOSITOL_KINASE_ACTIV | 8   | 18  | 16235 | 2978 | 2.42564  | 0.009576 |
| salmon      | 4952  | HORIUCHI_WTAP_TARGETS_DN                      | 7   | 302 | 15951 | 127  | 2.96634  | 0.009591 |
| pink        | 9276  | GSE20366_CD103_POS_VS_CD103_KLRG1_DP_TREG_L   | 7   | 168 | 16085 | 228  | 2.970212 | 0.009607 |
| turquoise   | 186   | MITOCHONDRION                                 | 103 | 327 | 15926 | 4169 | 1.227979 | 0.009617 |
| red         | 2217  | YCATTAA_UNKNOWN                               | 22  | 396 | 15857 | 524  | 1.723176 | 0.009618 |
| green       | 6889  | FOSTER_TOLERANT_MACROPHAGE_UP                 | 20  | 142 | 16111 | 1305 | 1.754142 | 0.00963  |
| blue        | 2608  | GNF2_XRCC5                                    | 22  | 73  | 16180 | 2978 | 1.644783 | 0.009639 |
| lightcyan   | 8043  | SERVITJA_ISLET_HNF1A_TARGETS_UP               | 3   | 115 | 16138 | 62   | 6.838569 | 0.00964  |
| blue        | 10142 | GSE6269_E_COLI_VS_STREP_PNEUMO_INF_PBMC_UP    | 39  | 148 | 16105 | 2978 | 1.438175 | 0.009642 |
| blue        | 8527  | GSE13229_IMM_VS_INTMATURE_NKCELL_DN           | 49  | 194 | 16059 | 2978 | 1.378489 | 0.00965  |
| blue        | 9006  | GSE17721_POLYIC_VS_CPG_2H_BMDM_UP             | 49  | 194 | 16059 | 2978 | 1.378489 | 0.00965  |
| blue        | 9334  | GSE22886_NAIVE_BCELL_VS_BLOOD_PLASMA_CELL_UI  | 49  | 194 | 16059 | 2978 | 1.378489 | 0.00965  |
| blue        | 9413  | GSE24142_DN2_VS_DN3_THYMOCYTE_DN              | 49  | 194 | 16059 | 2978 | 1.378489 | 0.00965  |
| red         | 7644  | BOYLAN_MULTIPLE_MYELOMA_PCA1_UP               | 8   | 92  | 16161 | 524  | 2.697146 | 0.009651 |
| blue        | 8059  | WAKABAYASHI_ADIPOGENESIS_PPARG_RXRA_BOUND_    | 177 | 823 | 15430 | 2978 | 1.173768 | 0.009656 |
| cyan        | 4827  | ONKEN_UVEAL_MELANOMA_UP                       | 9   | 761 | 15492 | 77   | 2.496322 | 0.009659 |
| red         | 5176  | ENK_UV_RESPONSE_KERATINOCYTE_DN               | 25  | 468 | 15785 | 524  | 1.6569   | 0.009661 |
| blue        | 2071  | GGCAGCT,MIR-22                                | 52  | 208 | 16045 | 2978 | 1.364422 | 0.009668 |
| purple      | 8571  | GSE13484_12H_VS_3H_YF17D_VACCINE_STIM_PBMC_   | 6   | 187 | 16066 | 157  | 3.321571 | 0.009673 |
| blue        | 8315  | RB_P107_DN.V1_DN                              | 33  | 121 | 16132 | 2978 | 1.488461 | 0.009687 |
| turquoise   | 4721  | REACTOME_MITOTIC_PROMETAPHASE                 | 32  | 85  | 16168 | 4169 | 1.467684 | 0.00969  |
| turquoise   | 852   | REGULATION_OF_CYTOSKELETON_ORGANIZATION_AN    | 13  | 27  | 16226 | 4169 | 1.877073 | 0.009703 |
| turquoise   | 7076  | BONOME_OVARIAN_CANCER_POOR_SURVIVAL_UP        | 13  | 27  | 16226 | 4169 | 1.877073 | 0.009703 |
| grey60      | 9601  | GSE27786_NKCELL_VS_ERYTHROBLAST_DN            | 3   | 163 | 16090 | 44   | 6.798522 | 0.009707 |
| red         | 7185  | CHEN_HOXA5_TARGETS_9HR_UP                     | 14  | 214 | 16039 | 524  | 2.029161 | 0.00971  |
| yellow      | 6786  | BILD_MYC_ONCOGENIC_SIGNATURE                  | 27  | 192 | 16061 | 1426 | 1.60279  | 0.009712 |
| yellow      | 9526  | GSE2706_2H_VS_8H_R848_AND_LPS_STIM_DC_UP      | 27  | 192 | 16061 | 1426 | 1.60279  | 0.009712 |
| yellow      | 10011 | GSE3982_MAST_CELL_VS_TH2_DN                   | 27  | 192 | 16061 | 1426 | 1.60279  | 0.009712 |
| blue        | 3686  | MODULE_206                                    | 37  | 139 | 16114 | 2978 | 1.452766 | 0.009718 |
| purple      | 6971  | SARRIO_EPITHELIAL_MESENCHYMAL_TRANSITION_DN   | 5   | 134 | 16119 | 157  | 3.862772 | 0.009719 |
| purple      | 9642  | GSE29615_DAY3_VS_DAY7_LAIV_FLU_VACCINE_PBMC_  | 5   | 134 | 16119 | 157  | 3.862772 | 0.009719 |
| magenta     | 3599  | MODULE_111                                    | 5   | 126 | 16127 | 167  | 3.862038 | 0.009721 |
| red         | 2847  | KEGG_B_CELL_RECEPTOR_SIGNALING_PATHWAY        | 7   | 74  | 16179 | 524  | 2.934057 | 0.009724 |
| red         | 4962  | RODRIGUES_DCC_TARGETS_UP                      | 2   | 5   | 16248 | 524  | 12.40687 | 0.009724 |
| red         | 8098  | LIU_IL13_MEMORY_MODEL_DN                      | 2   | 5   | 16248 | 524  | 12.40687 | 0.009724 |
| lightgreen  | 4368  | REACTOME_CLASS_A1_RHODOPSIN_LIKE_RECEPTORS    | 3   | 171 | 16082 | 42   | 6.789056 | 0.009726 |
| lightgreen  | 5044  | TONKS_TARGETS_OF_RUNX1_RUNX1T1_FUSION_HSC_    | 3   | 171 | 16082 | 42   | 6.789056 | 0.009726 |
| magenta     | 9042  | GSE17721_LPS_VS_CPG_2H_BMDM_UP                | 6   | 176 | 16077 | 167  | 3.317842 | 0.009726 |
| magenta     | 9742  | GSE32423_MEMORY_VS_NAIVE_CD8_TCELL_UP         | 6   | 176 | 16077 | 167  | 3.317842 | 0.009726 |
| magenta     | 23    | EXTRACELLULAR_MATRIX_PART                     | 3   | 43  | 16210 | 167  | 6.790001 | 0.009731 |
| purple      | 3503  | MODULE_11                                     | 10  | 435 | 15818 | 157  | 2.379823 | 0.009732 |
| turquoise   | 1982  | CACTTTG,MIR-520G,MIR-520H                     | 65  | 195 | 16058 | 4169 | 1.299512 | 0.009736 |
| turquoise   | 8936  | GSE17721_POLYIC_VS_PAM3CSK4_4H_BMDM_UP        | 65  | 195 | 16058 | 4169 | 1.299512 | 0.009736 |
| turquoise   | 9959  | GSE3982_MEMORY_CD4_TCELL_VS_TH1_DN            | 65  | 195 | 16058 | 4169 | 1.299512 | 0.009736 |
| cyan        | 9273  | GSE20366_CD103_POS_VS_NEG_TREG_KLRG1NEG_DN    | 4   | 176 | 16077 | 77   | 4.797226 | 0.009738 |
| cyan        | 9717  | GSE30083_SP2_VS_SP3_THYMOCYTE_DN              | 4   | 176 | 16077 | 77   | 4.797226 | 0.009738 |
| cyan        | 6665  | KEEN_RESPONSE_TO_ROSIGLITAZONE_DN             | 3   | 93  | 16160 | 77   | 6.808965 | 0.009777 |
| black       | 8331  | PDGF_ERK_DN.V1_DN                             | 7   | 136 | 16117 | 283  | 2.956012 | 0.009793 |
| salmon      | 8490  | GSE11924_TH2_VS_TH17_CD4_TCELL_UP             | 5   | 166 | 16087 | 127  | 3.85471  | 0.009797 |
| cyan        | 7408  | ZHANG_TLX_TARGETS_60HR_UP                     | 5   | 275 | 15978 | 77   | 3.83778  | 0.009817 |
| red         | 200   | NUCLEAR_MEMBRANE_PART                         | 5   | 41  | 16212 | 524  | 3.782582 | 0.009833 |
| red         | 6465  | MCDOWELL_ACUTE_LUNG_INJURY_UP                 | 5   | 41  | 16212 | 524  | 3.782582 | 0.009833 |
| red         | 7606  | KUROZUMI_RESPONSE_TO_ONCOCYTIC_VIRUS          | 5   | 41  | 16212 | 524  | 3.782582 | 0.009833 |
| greenyello  | 3827  | MODULE_399                                    | 3   | 48  | 16205 | 150  | 6.772083 | 0.009839 |
| tan         | 3641  | MODULE_156                                    | 2   | 17  | 16236 | 145  | 13.18702 | 0.009847 |
| tan         | 4626  | REACTOME_DESTABILIZATION_OF_MRNA_BY_BRF1      | 2   | 17  | 16236 | 145  | 13.18702 | 0.009847 |
| tan         | 4641  | REACTOME_DESTABILIZATION_OF_MRNA_BY_KSRP      | 2   | 17  | 16236 | 145  | 13.18702 | 0.009847 |
| tan         | 4644  | REACTOME_DESTABILIZATION_OF_MRNA_BY_TRISTETI  | 2   | 17  | 16236 | 145  | 13.18702 | 0.009847 |
| lightyellow | 7445  | TAVAZOIE_METASTASIS                           | 2   | 74  | 16179 | 33   | 13.31122 | 0.009856 |

|            |      |                                             |     |     |       |      |          |          |
|------------|------|---------------------------------------------|-----|-----|-------|------|----------|----------|
| lightcyan  | 853  | CHEMICAL_HOMEOSTASIS                        | 3   | 116 | 16137 | 62   | 6.779616 | 0.009869 |
| lightcyan  | 5187 | CHIARADONNA_NEOPLASTIC_TRANSFORMATION_KRAS  | 3   | 116 | 16137 | 62   | 6.779616 | 0.009869 |
| lightcyan  | 5259 | OUELLET_OVARIAN_CANCER_INVASIVE_VS_LMP_UP   | 3   | 116 | 16137 | 62   | 6.779616 | 0.009869 |
| salmon     | 4435 | REACTOME_MRNA_SPLICING                      | 4   | 107 | 16146 | 127  | 4.784164 | 0.009884 |
| brown      | 2333 | MORF_RPA2                                   | 37  | 187 | 16066 | 2190 | 1.468417 | 0.009885 |
| brown      | 9414 | GSE24142_EARLY_THYMIC_PROGENITOR_VS_DN2_THY | 37  | 187 | 16066 | 2190 | 1.468417 | 0.009885 |
| brown      | 9768 | GSE339_CD4POS_VS_CD8POS_DC_UP               | 37  | 187 | 16066 | 2190 | 1.468417 | 0.009885 |
| brown      | 5455 | LINDGREN_BLADDER_CANCER_CLUSTER_2B          | 61  | 338 | 15915 | 2190 | 1.339376 | 0.009906 |
| brown      | 7555 | YAGI_AML_WITH_T_8_21_TRANSLOCATION          | 61  | 338 | 15915 | 2190 | 1.339376 | 0.009906 |
| pink       | 5292 | MCBRYAN_PUBERTAL_BREAST_3_4WK_UP            | 7   | 169 | 16084 | 228  | 2.952637 | 0.009907 |
| purple     | 7982 | WIEDERSCHAIN_TARGETS_OF_BMI1_AND_PCGF2      | 3   | 46  | 16207 | 157  | 6.751454 | 0.009907 |
| blue       | 2103 | ACCAAAG,MIR-9                               | 101 | 444 | 15809 | 2978 | 1.241501 | 0.009908 |
| midnightb  | 8687 | GSE1460_INTRATHYMIC_T_PROGENITOR_VS_CD4_THY | 4   | 192 | 16061 | 71   | 4.769073 | 0.009911 |
| pink       | 742  | APOPTOTIC_MITOCHONDRIAL_CHANGES             | 2   | 11  | 16242 | 228  | 12.96093 | 0.009914 |
| pink       | 992  | HEME_METABOLIC_PROCESS                      | 2   | 11  | 16242 | 228  | 12.96093 | 0.009914 |
| pink       | 3787 | MODULE_335                                  | 2   | 11  | 16242 | 228  | 12.96093 | 0.009914 |
| pink       | 5328 | MCBRYAN_TERMINAL_END_BUD_UP                 | 2   | 11  | 16242 | 228  | 12.96093 | 0.009914 |
| pink       | 5921 | PETRETTO_BLOOD_PRESSURE_UP                  | 2   | 11  | 16242 | 228  | 12.96093 | 0.009914 |
| purple     | 6637 | WELCSH_BRCA1_TARGETS_UP                     | 6   | 188 | 16065 | 157  | 3.303903 | 0.009914 |
| turquoise  | 7356 | CHANG_CORE_SERUM_RESPONSE_DN                | 67  | 202 | 16051 | 4169 | 1.293079 | 0.009917 |
| cyan       | 8861 | GSE17721_CTRL_VS_POLYIC_12H_BMDM_DN         | 4   | 177 | 16076 | 77   | 4.770123 | 0.009928 |
| turquoise  | 399  | ORGANELLE_ORGANIZATION_AND_BIOGENESIS       | 135 | 441 | 15812 | 4169 | 1.19343  | 0.009941 |
| turquoise  | 2445 | MORF_PRKAR1A                                | 49  | 141 | 16112 | 4169 | 1.354811 | 0.009956 |
| brown      | 1004 | REGULATION_OF_TRANSCRIPTION                 | 86  | 501 | 15752 | 2190 | 1.273943 | 0.009957 |
| pink       | 737  | GLYCOPROTEIN_BIOSYNTHETIC_PROCESS           | 4   | 60  | 16193 | 228  | 4.752339 | 0.009961 |
| greenyello | 9306 | GSE22886_CD8_VS_CD4_NAIVE_TCELL_UP          | 6   | 197 | 16056 | 150  | 3.300102 | 0.009962 |
| red        | 2269 | TGASTMAGC_V\$NFE2_01                        | 12  | 172 | 16081 | 524  | 2.163989 | 0.009964 |
| red        | 9323 | GSE22886_TCELL_VS_BCELL_NAIVE_DN            | 12  | 172 | 16081 | 524  | 2.163989 | 0.009964 |
| red        | 9325 | GSE22886_CD8_TCELL_VS_BCELL_NAIVE_DN        | 12  | 172 | 16081 | 524  | 2.163989 | 0.009964 |
| tan        | 6754 | BROWNE_HCMV_INFECTION_6HR_DN                | 5   | 146 | 16107 | 145  | 3.838687 | 0.009971 |
| brown      | 8613 | GSE14000_TRANSLATED_RNA_VS_MRNA_16H_LPS_DC  | 36  | 181 | 16072 | 2190 | 1.476092 | 0.009981 |
| magenta    | 9007 | GSE17721_POLYIC_VS_CPG_2H_BMDM_DN           | 6   | 177 | 16076 | 167  | 3.299097 | 0.009984 |
| lightgreen | 5784 | NUYTEN_EZH2_TARGETS_UP                      | 7   | 946 | 15307 | 42   | 2.86346  | 0.009998 |
| green      | 9078 | GSE17721_LPS_VS_GARDIQUIMOD_2H_BMDM_UP      | 23  | 171 | 16082 | 1305 | 1.675154 | 0.010004 |
| pink       | 6072 | HOUSTIS_ROS                                 | 3   | 32  | 16221 | 228  | 6.682977 | 0.010014 |
| pink       | 6134 | SHIPP_DLBCL_CURED_VS_FATAL_UP               | 3   | 32  | 16221 | 228  | 6.682977 | 0.010014 |
| cyan       | 2621 | GNF2_CD48                                   | 2   | 32  | 16221 | 77   | 13.19237 | 0.010023 |
| cyan       | 3037 | BIOCARTA_PDGF_PATHWAY                       | 2   | 32  | 16221 | 77   | 13.19237 | 0.010023 |
| brown      | 45   | MYOFIBRIL                                   | 6   | 15  | 16238 | 2190 | 2.968584 | 0.010026 |
| brown      | 1391 | SIGNAL_SEQUENCE_BINDING                     | 6   | 15  | 16238 | 2190 | 2.968584 | 0.010026 |
| brown      | 3134 | chr18q23                                    | 6   | 15  | 16238 | 2190 | 2.968584 | 0.010026 |
| brown      | 3485 | SA_MMP_CYTOKINE_CONNECTION                  | 6   | 15  | 16238 | 2190 | 2.968584 | 0.010026 |
| brown      | 4005 | PID_ARF6DOWNSTREAMPATHWAY                   | 6   | 15  | 16238 | 2190 | 2.968584 | 0.010026 |
| brown      | 5078 | HUMMEL_BURKITTS_LYMPHOMA_DN                 | 6   | 15  | 16238 | 2190 | 2.968584 | 0.010026 |
| brown      | 6335 | YAO_HOXA10_TARGETS_VIA_PROGESTERONE_DN      | 6   | 15  | 16238 | 2190 | 2.968584 | 0.010026 |
| brown      | 5239 | GRAESSMANN_RESPONSE_TO_MC_AND_DOXORUBICIN   | 97  | 574 | 15679 | 2190 | 1.254149 | 0.010028 |
| salmon     | 6705 | DAZARD_UV_RESPONSE_CLUSTER_G1               | 3   | 57  | 16196 | 127  | 6.735599 | 0.010029 |
| black      | 7765 | GERHOLD_RESPONSE_TO_TZD_DN                  | 2   | 9   | 16244 | 283  | 12.76247 | 0.010032 |
| purple     | 4430 | REACTOME_DOWNSTREAM_SIGNAL_TRANSDUCTION     | 4   | 87  | 16166 | 157  | 4.759646 | 0.010032 |
| purple     | 5127 | GRAHAM_CML_DIVIDING_VS_NORMAL QUIESCENT_D   | 4   | 87  | 16166 | 157  | 4.759646 | 0.010032 |
| purple     | 7466 | CROONQUIST_NRAS_VS_STROMAL_STIMULATION_DN   | 4   | 87  | 16166 | 157  | 4.759646 | 0.010032 |
| grey60     | 4933 | DOANE_RESPONSE_TO_ANDROGEN_UP               | 3   | 165 | 16088 | 44   | 6.716116 | 0.010033 |
| turquoise  | 8204 | GCNP_SHH_UP_LATE.V1_UP                      | 57  | 168 | 16085 | 4169 | 1.322718 | 0.010033 |
| lightgreen | 8259 | MEK_UP.V1_DN                                | 3   | 173 | 16080 | 42   | 6.71057  | 0.010037 |
| magenta    | 4489 | REACTOME_G_ALPHA_I_SIGNALLING_EVENTS        | 5   | 127 | 16126 | 167  | 3.831628 | 0.010038 |
| salmon     | 8588 | GSE13485_DAY3_VS_DAY7_YF17D_VACCINE_PBMC_UI | 5   | 167 | 16086 | 127  | 3.831628 | 0.010038 |
| turquoise  | 4599 | REACTOME_ASSEMBLY_OF_THE_PRE_REPLICATIVE_CO | 25  | 63  | 16190 | 4169 | 1.547038 | 0.010038 |
| green      | 4087 | PID_SYNDECAN_2_PATHWAY                      | 7   | 31  | 16222 | 1305 | 2.812285 | 0.010049 |
| brown      | 9794 | GSE360_CTRL_VS_L_MAJOR_DC_UP                | 35  | 175 | 16078 | 2190 | 1.484292 | 0.010063 |
| green      | 9386 | GSE22886_IL2_VS_IL15_STIM_NKCELL_UP         | 18  | 124 | 16129 | 1305 | 1.807898 | 0.010084 |

|             |                                                   |     |      |       |      |          |          |
|-------------|---------------------------------------------------|-----|------|-------|------|----------|----------|
| brown       | 1261 SULFURIC_ESTER_HYDROLASE_ACTIVITY            | 5   | 11   | 16242 | 2190 | 3.373391 | 0.010087 |
| brown       | 2997 BIOCARTA_IL4_PATHWAY                         | 5   | 11   | 16242 | 2190 | 3.373391 | 0.010087 |
| brown       | 4301 REACTOME_RETROGRADE_NEUROTROPHIN_SIGNALLIN   | 5   | 11   | 16242 | 2190 | 3.373391 | 0.010087 |
| brown       | 5483 MYLLYKANGAS_AMPLIFICATION_HOT_SPOT_12        | 5   | 11   | 16242 | 2190 | 3.373391 | 0.010087 |
| brown       | 6774 VERRECCHIA_RESPONSE_TO_TGFB1_C3              | 5   | 11   | 16242 | 2190 | 3.373391 | 0.010087 |
| red         | 1921 V\$E2F1_Q3_01                                | 14  | 215  | 16038 | 524  | 2.019723 | 0.010091 |
| red         | 8113 PHONG_TNF_RESPONSE_VIA_P38_COMPLETE          | 14  | 215  | 16038 | 524  | 2.019723 | 0.010091 |
| magenta     | 278 REGULATION_OF_DEFENSE_RESPONSE                | 2   | 15   | 16238 | 167  | 12.97645 | 0.010093 |
| magenta     | 7788 NIELSEN_LEIOMYOSARCOMA_CNN1_DN               | 2   | 15   | 16238 | 167  | 12.97645 | 0.010093 |
| brown       | 345 SIGNAL_TRANSDUCTION                           | 208 | 1331 | 14922 | 2190 | 1.159778 | 0.010098 |
| blue        | 3510 MODULE_18                                    | 94  | 410  | 15843 | 2978 | 1.251275 | 0.010101 |
| magenta     | 929 CATION_HOMEOSTASIS                            | 4   | 82   | 16171 | 167  | 4.747481 | 0.010107 |
| lightyellow | 7120 MATZUK_STEROIDOGENESIS                       | 1   | 5    | 16248 | 33   | 98.50303 | 0.010112 |
| lightyellow | 7985 KASLER_HDAC7_TARGETS_2_UP                    | 1   | 5    | 16248 | 33   | 98.50303 | 0.010112 |
| lightyellow | 6059 ROSS_AML_WITH_PML_RARA_FUSION                | 2   | 75   | 16178 | 33   | 13.13374 | 0.010114 |
| blue        | 6975 MARZEC_IL2_SIGNALING_UP                      | 30  | 108  | 16145 | 2978 | 1.516025 | 0.010118 |
| cyan        | 5014 TAKEDA_TARGETS_OF_NUP98_HOXA9_FUSION_10D_L   | 4   | 178  | 16075 | 77   | 4.743324 | 0.010121 |
| cyan        | 8469 GSE11864_CSF1_VS_CSF1_IFNG_IN_MAC_DN         | 4   | 178  | 16075 | 77   | 4.743324 | 0.010121 |
| cyan        | 8855 GSE17721_CTRL_VS_POLYIC_4H_BMDM_DN           | 4   | 178  | 16075 | 77   | 4.743324 | 0.010121 |
| cyan        | 9795 GSE360_CTRL_VS_L_MAJOR_DC_DN                 | 4   | 178  | 16075 | 77   | 4.743324 | 0.010121 |
| yellow      | 8285 ESC_J1_UP_EARLY.V1_DN                        | 23  | 157  | 16096 | 1426 | 1.669714 | 0.010125 |
| yellow      | 8881 GSE17721_CTRL_VS_CPG_0.5H_BMDM_DN            | 23  | 157  | 16096 | 1426 | 1.669714 | 0.010125 |
| brown       | 10214 GSE8515_CTRL_VS_IL1_4H_STIM_MAC_UP          | 34  | 169  | 16084 | 2190 | 1.493075 | 0.010132 |
| brown       | 10236 GSE9006_1MONTH_VS_4MONTH_POST_TYPE_1_DIABI  | 34  | 169  | 16084 | 2190 | 1.493075 | 0.010132 |
| blue        | 1902 V\$AP2_Q6_01                                 | 57  | 232  | 16021 | 2978 | 1.340898 | 0.010154 |
| purple      | 10016 GSE3982_DC_VS_BCELL_UP                      | 6   | 189  | 16064 | 157  | 3.286422 | 0.010159 |
| purple      | 10024 GSE3982_DC_VS_NKCELL_UP                     | 6   | 189  | 16064 | 157  | 3.286422 | 0.010159 |
| lightcyan   | 5568 DAUER_STAT3_TARGETS_UP                       | 2   | 40   | 16213 | 62   | 13.10726 | 0.010174 |
| purple      | 417 REGULATION_OF_MUSCLE_CONTRACTION              | 2   | 16   | 16237 | 157  | 12.94029 | 0.010181 |
| purple      | 5527 LUND_SILENCED_BY_METHYLATION                 | 2   | 16   | 16237 | 157  | 12.94029 | 0.010181 |
| purple      | 6054 NELSON_RESPONSE_TO_ANDROGEN_DN               | 2   | 16   | 16237 | 157  | 12.94029 | 0.010181 |
| purple      | 6378 HASLINGER_B_CLL_WITH_6Q21_DELETION           | 2   | 16   | 16237 | 157  | 12.94029 | 0.010181 |
| purple      | 6718 NIELSEN_LEIOMYOSARCOMA_CNN1_UP               | 2   | 16   | 16237 | 157  | 12.94029 | 0.010181 |
| purple      | 7786 NIELSEN_GIST_VS_SYNOVIAL_SARCOMA_DN          | 2   | 16   | 16237 | 157  | 12.94029 | 0.010181 |
| greenyello  | 1853 V\$HMGYI_Q6                                  | 6   | 198  | 16055 | 150  | 3.283434 | 0.010197 |
| greenyello  | 8399 GOLDRATH_NAIVE_VS_EFF_CD8_TCELL_DN           | 6   | 198  | 16055 | 150  | 3.283434 | 0.010197 |
| midnightb   | 3162 chr2q32                                      | 2   | 35   | 16218 | 71   | 13.08089 | 0.0102   |
| green       | 6815 MONNIER_POSTRADIATION_TUMOR_ESCAPE_DN        | 41  | 352  | 15901 | 1305 | 1.450655 | 0.010212 |
| greenyello  | 9352 GSE22886_NEUTROPHIL_VS_DC_UP                 | 5   | 142  | 16111 | 150  | 3.815258 | 0.01022  |
| brown       | 2368 MORF_CSNK1D                                  | 17  | 70   | 16183 | 2190 | 1.802355 | 0.010222 |
| purple      | 5876 KOYAMA_SEMA3B_TARGETS_UP                     | 7   | 247  | 16006 | 157  | 2.93383  | 0.010223 |
| brown       | 8057 WAKABAYASHI_ADIPOGENESIS_PPARG_RXRA_BOUND_   | 30  | 145  | 16108 | 2190 | 1.535475 | 0.010225 |
| salmon      | 6818 CREIGHTON_ENDOCRINE_THERAPY_RESISTANCE_1     | 9   | 461  | 15792 | 127  | 2.498454 | 0.010229 |
| brown       | 954 PROTEIN_TRANSPORT                             | 31  | 151  | 16102 | 2190 | 1.523611 | 0.010233 |
| turquoise   | 1839 V\$SMAD4_Q6                                  | 64  | 192  | 16061 | 4169 | 1.299512 | 0.01025  |
| turquoise   | 9729 GSE30962_ACUTE_VS_CHRONIC_LCMV_SECONDARY_II  | 64  | 192  | 16061 | 4169 | 1.299512 | 0.01025  |
| midnightb   | 9140 GSE17721_0.5H_VS_4H_GARDIQUIMOD_BMDM_UP      | 4   | 194  | 16059 | 71   | 4.719907 | 0.010267 |
| midnightb   | 9380 GSE22886_NAIVE_CD4_TCELL_VS_MONOCYTE_UP      | 4   | 194  | 16059 | 71   | 4.719907 | 0.010267 |
| midnightb   | 9436 GSE24634_NAIVE_CD4_TCELL_VS_DAY7_IL4_CONV_TR | 4   | 194  | 16059 | 71   | 4.719907 | 0.010267 |
| midnightb   | 9451 GSE24634_TEFF_VS_TCONV_DAY5_IN_CULTURE_DN    | 4   | 194  | 16059 | 71   | 4.719907 | 0.010267 |
| midnightb   | 9706 GSE29618_LAIV_VS_TIV_FLU_VACCINE_DAY7_PDC_UP | 4   | 194  | 16059 | 71   | 4.719907 | 0.010267 |
| midnightb   | 10270 GSE9988_ANTI_TREM1_VS_LOW_LPS_MONOCYTE_UP   | 4   | 194  | 16059 | 71   | 4.719907 | 0.010267 |
| red         | 6665 KEEN_RESPONSE_TO_ROSIGLITAZONE_DN            | 8   | 93   | 16160 | 524  | 2.668144 | 0.010271 |
| lightyellow | 3530 MODULE_41                                    | 4   | 424  | 15829 | 33   | 4.646369 | 0.010274 |
| blue        | 5746 PUJANA_BRCA_CENTERED_NETWORK                 | 32  | 117  | 16136 | 2978 | 1.492701 | 0.010281 |
| turquoise   | 3612 MODULE_124                                   | 35  | 95   | 16158 | 4169 | 1.436303 | 0.010281 |
| salmon      | 8407 GSE10239_NAIVE_VS_MEMORY_CD8_TCELL_DN        | 5   | 168  | 16085 | 127  | 3.808821 | 0.010282 |
| blue        | 8610 GSE14000_TRANSLATED_RNA_VS_MRNA_4H_LPS_DC_   | 48  | 190  | 16063 | 2978 | 1.378785 | 0.010292 |
| lightgreen  | 7545 BUDHU_LIVER_CANCER_METASTASIS_DN             | 1   | 4    | 16249 | 42   | 96.74405 | 0.010298 |
| lightgreen  | 7758 VERRECCHIA_RESPONSE_TO_TGFB1_C6              | 1   | 4    | 16249 | 42   | 96.74405 | 0.010298 |

|             |                                                       |     |      |       |      |          |          |
|-------------|-------------------------------------------------------|-----|------|-------|------|----------|----------|
| lightgreen  | 1946 TGCTGCT,MIR-15A,MIR-16,MIR-15B,MIR-195,MIR-424,I | 5   | 517  | 15736 | 42   | 3.742516 | 0.010299 |
| turquoise   | 5576 HEIDENBLAD_AMPLIFIED_IN_PANCREATIC_CANCER        | 14  | 30   | 16223 | 4169 | 1.819317 | 0.010302 |
| red         | 8555 GSE13411_IGM_VS_SWITCHED_MEMORY_BCELL_DN         | 13  | 194  | 16059 | 524  | 2.078471 | 0.010318 |
| red         | 8979 GSE17721_CPG_VS_GARDIQUIMOD_12H_BMDM_DN          | 13  | 194  | 16059 | 524  | 2.078471 | 0.010318 |
| red         | 9470 GSE25087_TREG_VS_TCONV_ADULT_UP                  | 13  | 194  | 16059 | 524  | 2.078471 | 0.010318 |
| purple      | 8548 GSE13411_NAIVE_VS_SWITCHED_MEMORY_BCELL_UP       | 5   | 136  | 16117 | 157  | 3.805967 | 0.010319 |
| blue        | 3982 PID_CDC42_REG_PATHWAY                            | 11  | 29   | 16224 | 2978 | 2.070158 | 0.01032  |
| blue        | 7491 VALK_AML_CLUSTER_15                              | 11  | 29   | 16224 | 2978 | 2.070158 | 0.01032  |
| cyan        | 7860 CHICAS_RB1_TARGETS_SENESCENT                     | 7   | 509  | 15744 | 77   | 2.90284  | 0.010321 |
| turquoise   | 1705 V\$E2F1_Q3                                       | 73  | 223  | 16030 | 4169 | 1.276203 | 0.010336 |
| lightcyan   | 4934 DOANE_RESPONSE_TO_ANDROGEN_DN                    | 4   | 223  | 16030 | 62   | 4.702155 | 0.010344 |
| magenta     | 4244 REACTOME_COLLAGEN_FORMATION                      | 3   | 44   | 16209 | 167  | 6.635683 | 0.010366 |
| magenta     | 7267 BOYLAN_MULTIPLE_MYELOMA_C_UP                     | 3   | 44   | 16209 | 167  | 6.635683 | 0.010366 |
| magenta     | 7842 STAMBOLSKY_TARGETS_OF_MUTATED_TP53_UP            | 3   | 44   | 16209 | 167  | 6.635683 | 0.010366 |
| salmon      | 42 CYTOPLASMIC_PART                                   | 18  | 1277 | 14976 | 127  | 1.803896 | 0.010372 |
| lightyellow | 6354 CROMER_METASTASIS_DN                             | 2   | 76   | 16177 | 33   | 12.96093 | 0.010374 |
| yellow      | 8919 GSE17721_LPS_VS_POLYIC_4H_BMDM_DN                | 27  | 193  | 16060 | 1426 | 1.594485 | 0.010377 |
| yellow      | 10095 GSE3982_CENT_MEMORY_CD4_TCELL_VS_TH2_DN         | 27  | 193  | 16060 | 1426 | 1.594485 | 0.010377 |
| blue        | 2512 GCM_DDX5                                         | 20  | 65   | 16188 | 2978 | 1.679289 | 0.010382 |
| blue        | 4167 REACTOME_MEIOSIS                                 | 24  | 82   | 16171 | 2978 | 1.597373 | 0.0104   |
| blue        | 7917 ACOSTA_PROLIFERATION_INDEPENDENT_MYC_TARGET      | 24  | 82   | 16171 | 2978 | 1.597373 | 0.0104   |
| greenyellow | 7644 BOYLAN_MULTIPLE_MYELOMA_PCA1_UP                  | 4   | 92   | 16161 | 150  | 4.711014 | 0.0104   |
| red         | 135 LIPID_RAFT                                        | 4   | 27   | 16226 | 524  | 4.595137 | 0.010402 |
| red         | 3276 chr9q32                                          | 4   | 27   | 16226 | 524  | 4.595137 | 0.010402 |
| red         | 3732 MODULE_265                                       | 4   | 27   | 16226 | 524  | 4.595137 | 0.010402 |
| red         | 9798 GSE360_CTRL_VS_B_MALAYI_HIGH_DOSE_DC_UP          | 12  | 173  | 16080 | 524  | 2.15148  | 0.010405 |
| red         | 9954 GSE3982_CTRL_VS_LPS_1H_NEUTROPHIL_UP             | 12  | 173  | 16080 | 524  | 2.15148  | 0.010405 |
| magenta     | 6801 DURCHDEWALD_SKIN_CARCINOGENESIS_DN               | 7   | 233  | 16020 | 167  | 2.923878 | 0.010416 |
| red         | 4970 VECCHI_GASTRIC_CANCER_ADVANCED_VS_EARLY_UP       | 10  | 132  | 16121 | 524  | 2.349786 | 0.010428 |
| purple      | 6558 CHEN_LVAD_SUPPORT_OF_FAILING_HEART_UP            | 4   | 88   | 16165 | 157  | 4.705559 | 0.010433 |
| purple      | 7787 NIELSEN_GIST                                     | 4   | 88   | 16165 | 157  | 4.705559 | 0.010433 |
| red         | 6254 GUO_HEX_TARGETS_UP                               | 7   | 75   | 16178 | 524  | 2.894936 | 0.010436 |
| red         | 7091 BASSO_HAIRY_CELL_LEUKEMIA_DN                     | 7   | 75   | 16178 | 524  | 2.894936 | 0.010436 |
| purple      | 7565 MIKKELSEN_MCV6_HCP_WITH_H3K27ME3                 | 7   | 248  | 16005 | 157  | 2.922    | 0.010437 |
| turquoise   | 8394 KAECH_DAY8_EFF_VS_MEMORY_CD8_TCELL_UP            | 66  | 199  | 16054 | 4169 | 1.292982 | 0.01044  |
| turquoise   | 8437 GSE10325_BCELL_VS_LUPUS_BCELL_DN                 | 66  | 199  | 16054 | 4169 | 1.292982 | 0.01044  |
| green       | 9069 GSE17721_POLYIC_VS_GARDIQUIMOD_12H_BMDM_D        | 25  | 191  | 16062 | 1305 | 1.630158 | 0.010441 |
| midnightb   | 9340 GSE22886_IGG_IGA_MEMORY_BCELL_VS_BM_PLASMA       | 4   | 195  | 16058 | 71   | 4.695702 | 0.010448 |
| midnightb   | 9904 GSE36476_CTRL_VS_TSST_ACT_40H_MEMORY_CD4_T       | 4   | 195  | 16058 | 71   | 4.695702 | 0.010448 |
| turquoise   | 2137 AGGTGCA,MIR-500                                  | 30  | 79   | 16174 | 4169 | 1.480457 | 0.010485 |
| turquoise   | 4704 REACTOME_RESPIRATORY_ELECTRON_TRANSPORT_AT       | 30  | 79   | 16174 | 4169 | 1.480457 | 0.010485 |
| brown       | 1718 V\$ZIC3_01                                       | 39  | 200  | 16053 | 2190 | 1.447185 | 0.010485 |
| brown       | 7827 KARLSSON_TGFB1_TARGETS_DN                        | 39  | 200  | 16053 | 2190 | 1.447185 | 0.010485 |
| salmon      | 214 RIBOSOMAL_SUBUNIT                                 | 2   | 20   | 16233 | 127  | 12.79764 | 0.010498 |
| purple      | 3639 MODULE_154                                       | 3   | 47   | 16206 | 157  | 6.607806 | 0.010509 |
| purple      | 4760 REACTOME_AMYLOIDS                                | 3   | 47   | 16206 | 157  | 6.607806 | 0.010509 |
| purple      | 6673 ZHANG_ANTIVIRAL_RESPONSE_TO_RIBAVIRIN_DN         | 3   | 47   | 16206 | 157  | 6.607806 | 0.010509 |
| yellow      | 5517 ROSTY_CERVICAL_CANCER_PROLIFERATION_CLUSTER      | 21  | 140  | 16113 | 1426 | 1.709642 | 0.01051  |
| magenta     | 2266 GCANCTGNY_V\$MYOD_Q6                             | 15  | 750  | 15503 | 167  | 1.946467 | 0.010511 |
| cyan        | 8955 GSE17721_PAM3CSK4_VS_CPG_4H_BMDM_DN              | 4   | 180  | 16073 | 77   | 4.69062  | 0.010513 |
| magenta     | 8510 GSE12845_IGD_POS_BLOOD_VS_DARKZONE_GC_TONS       | 6   | 179  | 16074 | 167  | 3.262235 | 0.010515 |
| magenta     | 8933 GSE17721_POLYIC_VS_PAM3CSK4_1H_BMDM_DN           | 6   | 179  | 16074 | 167  | 3.262235 | 0.010515 |
| salmon      | 4166 REACTOME_ER_PHAGOSOME_PATHWAY                    | 3   | 58   | 16195 | 127  | 6.619468 | 0.010517 |
| salmon      | 6789 BILD_SRC_ONCOGENIC_SIGNATURE                     | 3   | 58   | 16195 | 127  | 6.619468 | 0.010517 |
| pink        | 1478 V\$SOX5_01                                       | 8   | 213  | 16040 | 228  | 2.677374 | 0.010517 |
| pink        | 5294 MCBRYAN_PUBERTAL_BREAST_4_5WK_UP                 | 8   | 213  | 16040 | 228  | 2.677374 | 0.010517 |
| salmon      | 7649 HOSHIDA_LIVER_CANCER_SUBCLASS_S2                 | 4   | 109  | 16144 | 127  | 4.696381 | 0.010529 |
| grey60      | 9797 GSE360_CTRL_VS_T_GONDII_DC_DN                    | 3   | 168  | 16085 | 44   | 6.596185 | 0.010534 |
| turquoise   | 2265 CACGTG_V\$MYC_Q2                                 | 267 | 922  | 15331 | 4169 | 1.128969 | 0.010542 |
| pink        | 2005 GTGTGAG,MIR-342                                  | 4   | 61   | 16192 | 228  | 4.674432 | 0.010546 |



|             |                                                   |     |     |       |      |          |          |
|-------------|---------------------------------------------------|-----|-----|-------|------|----------|----------|
| turquoise   | 1068 ACID_AMINO_ACID_LIGASE_ACTIVITY              | 23  | 57  | 16196 | 4169 | 1.573094 | 0.010551 |
| brown       | 4000 PID_NFAT_3PATHWAY                            | 14  | 54  | 16199 | 2190 | 1.924083 | 0.010553 |
| blue        | 7558 YAGI_AML_WITH_11Q23_REARRANGED               | 77  | 328 | 15925 | 2978 | 1.281226 | 0.010555 |
| black       | 7177 PODAR_RESPONSE_TO_ADAPHOSTIN_UP              | 7   | 138 | 16115 | 283  | 2.913172 | 0.01056  |
| lightcyan   | 5336 DARWICHE_PAPILLOMA_RISK_HIGH_UP              | 3   | 119 | 16134 | 62   | 6.608702 | 0.010576 |
| lightcyan   | 8278 PKCA_DN.V1_UP                                | 3   | 119 | 16134 | 62   | 6.608702 | 0.010576 |
| green       | 5149 GOZGIT_ESR1_TARGETS_DN                       | 65  | 608 | 15645 | 1305 | 1.331474 | 0.010579 |
| blue        | 8599 GSE13493_DP_VS_CD8POS_THYMOCYTE_DN           | 46  | 181 | 16072 | 2978 | 1.387037 | 0.010587 |
| turquoise   | 71 NON_MEMBRANE_BOUND_ORGANELLE                   | 172 | 575 | 15678 | 4169 | 1.166171 | 0.010596 |
| turquoise   | 177 INTRACELLULAR_NON_MEMBRANE_BOUND_ORGANEL      | 172 | 575 | 15678 | 4169 | 1.166171 | 0.010596 |
| brown       | 8339 SIRNA_EIF4GI_DN                              | 20  | 87  | 16166 | 2190 | 1.706083 | 0.010605 |
| brown       | 4821 HOLLMANN_APOPTOSIS_VIA_CD40_UP               | 38  | 194 | 16059 | 2190 | 1.453688 | 0.010624 |
| brown       | 9926 GSE37416_CTRL_VS_6H_F_TULARENSIS_LVS_NEUTROP | 38  | 194 | 16059 | 2190 | 1.453688 | 0.010624 |
| purple      | 4262 REACTOME_GASTRIN_CREB_SIGNALLING_PATHWAY_V   | 5   | 137 | 16116 | 157  | 3.778186 | 0.010629 |
| midnightb   | 8403 GOLDRATH_EFF_VS_MEMORY_CD8_TCELL_DN          | 4   | 196 | 16057 | 71   | 4.671745 | 0.010631 |
| midnightb   | 9374 GSE22886_NAIVE_CD8_TCELL_VS_MONOCYTE_UP      | 4   | 196 | 16057 | 71   | 4.671745 | 0.010631 |
| midnightb   | 9906 GSE36476_CTRL_VS_TSST_ACT_72H_MEMORY_CD4_T   | 4   | 196 | 16057 | 71   | 4.671745 | 0.010631 |
| midnightb   | 9939 GSE37416_0H_VS_12H_F_TULARENSIS_LVS_NEUTROPI | 4   | 196 | 16057 | 71   | 4.671745 | 0.010631 |
| midnightb   | 10268 GSE9988_ANTI_TREM1_VS_LPS_MONOCYTE_UP       | 4   | 196 | 16057 | 71   | 4.671745 | 0.010631 |
| blue        | 6876 SANSOM_APC_MYC_TARGETS                       | 52  | 209 | 16044 | 2978 | 1.357894 | 0.010633 |
| cyan        | 128 NUCLEAR_BODY                                  | 2   | 33  | 16220 | 77   | 12.7926  | 0.010637 |
| cyan        | 748 DNA_DAMAGE_RESPONSESIGNAL_TRANSDUCTION        | 2   | 33  | 16220 | 77   | 12.7926  | 0.010637 |
| lightyellow | 8190 ZWANG_EGF_INTERVAL_UP                        | 2   | 77  | 16176 | 33   | 12.7926  | 0.010637 |
| brown       | 3785 MODULE_333                                   | 8   | 24  | 16229 | 2190 | 2.47382  | 0.010647 |
| brown       | 4218 REACTOME_RORA_ACTIVATES_CIRCADIAN_EXPRESSIOI | 8   | 24  | 16229 | 2190 | 2.47382  | 0.010647 |
| blue        | 8616 GSE14000_UNSTIM_VS_16H_LPS_DC_TRANSLATED_RN  | 49  | 195 | 16058 | 2978 | 1.371419 | 0.010651 |
| blue        | 8709 GSE1460_CORD_VS_ADULT_BLOOD_NAIVE_CD4_TCELL  | 49  | 195 | 16058 | 2978 | 1.371419 | 0.010651 |
| blue        | 9740 GSE31082_CD4_VS_CD8_SP_THYMOCYTE_UP          | 49  | 195 | 16058 | 2978 | 1.371419 | 0.010651 |
| purple      | 1739 V\$FOXO1_02                                  | 6   | 191 | 16062 | 157  | 3.252009 | 0.010664 |
| purple      | 9347 GSE22886_DAY0_VS_DAY1_MONOCYTE_IN_CULTURE_   | 6   | 191 | 16062 | 157  | 3.252009 | 0.010664 |
| purple      | 9408 GSE24142_EARLY_THYMIC_PROGENITOR_VS_DN2_THY  | 6   | 191 | 16062 | 157  | 3.252009 | 0.010664 |
| brown       | 2008 AGGGCAG,MIR-18A                              | 24  | 110 | 16143 | 2190 | 1.619228 | 0.010665 |
| brown       | 2845 KEGG_NATURAL_KILLER_CELL_MEDIATED_CYTOTOXICI | 24  | 110 | 16143 | 2190 | 1.619228 | 0.010665 |
| brown       | 5786 INGRAM_SHH_TARGETS_UP                        | 24  | 110 | 16143 | 2190 | 1.619228 | 0.010665 |
| lightcyan   | 6248 MA_MYELOID_DIFFERENTIATION_DN                | 2   | 41  | 16212 | 62   | 12.78757 | 0.01067  |
| turquoise   | 4731 REACTOME_IMMUNE_SYSTEM                       | 234 | 801 | 15452 | 4169 | 1.138898 | 0.010674 |
| turquoise   | 2099 ATGCTGG,MIR-338                              | 38  | 105 | 16148 | 4169 | 1.410899 | 0.010677 |
| red         | 2230 YWATTWNNRGCT_UNKNOWN                         | 6   | 58  | 16195 | 524  | 3.208673 | 0.010697 |
| red         | 3230 chr1q25                                      | 6   | 58  | 16195 | 524  | 3.208673 | 0.010697 |
| red         | 6903 KYNG_DNA_DAMAGE_BY_UV                        | 6   | 58  | 16195 | 524  | 3.208673 | 0.010697 |
| cyan        | 4951 HORIUCHI_WTAP_TARGETS_UP                     | 5   | 281 | 15972 | 77   | 3.755835 | 0.010709 |
| cyan        | 9889 GSE360_LOW_DOSE_B_MALAYI_VS_M_TUBERCULOSIS   | 4   | 181 | 16072 | 77   | 4.664705 | 0.010713 |
| blue        | 2485 GCM_BNIP1                                    | 19  | 61  | 16192 | 2978 | 1.699936 | 0.01072  |
| black       | 5907 BENPORATH_ES_WITH_H3K27ME3                   | 20  | 654 | 15599 | 283  | 1.756303 | 0.010722 |
| turquoise   | 871 REGULATION_OF_JNK_ACTIVITY                    | 10  | 19  | 16234 | 4169 | 2.051861 | 0.010723 |
| turquoise   | 3293 chr14q12                                     | 10  | 19  | 16234 | 4169 | 2.051861 | 0.010723 |
| turquoise   | 6759 CHEN_ETV5_TARGETS_TESTIS                     | 10  | 19  | 16234 | 4169 | 2.051861 | 0.010723 |
| turquoise   | 7412 MELLMAN_TUT1_TARGETS_UP                      | 10  | 19  | 16234 | 4169 | 2.051861 | 0.010723 |
| turquoise   | 6836 HOWLIN_CITED1_TARGETS_1_DN                   | 15  | 33  | 16220 | 4169 | 1.772062 | 0.010726 |
| turquoise   | 2537 GCM_NF2                                      | 93  | 293 | 15960 | 4169 | 1.23742  | 0.010735 |
| red         | 8971 GSE17721_CPG_VS_GARDIQUIMOD_2H_BMDM_DN       | 13  | 195 | 16058 | 524  | 2.067812 | 0.010742 |
| red         | 9740 GSE31082_CD4_VS_CD8_SP_THYMOCYTE_UP          | 13  | 195 | 16058 | 524  | 2.067812 | 0.010742 |
| red         | 10040 GSE3982_MAC_VS_NKCELL_UP                    | 13  | 195 | 16058 | 524  | 2.067812 | 0.010742 |
| turquoise   | 2369 MORF_CSNK2B                                  | 91  | 286 | 15967 | 4169 | 1.240444 | 0.010748 |
| brown       | 8628 GSE14308_TH2_VS_TH1_UP                       | 37  | 188 | 16065 | 2190 | 1.460607 | 0.010753 |
| brown       | 8806 GSE15930_STIM_VS_STIM_AND_TRICHOSTATINA_48H_ | 37  | 188 | 16065 | 2190 | 1.460607 | 0.010753 |
| brown       | 9064 GSE17721_POLYIC_VS_GARDIQUIMOD_6H_BMDM_UP    | 37  | 188 | 16065 | 2190 | 1.460607 | 0.010753 |
| midnightb   | 504 NEGATIVE_REGULATION_OF_GROWTH                 | 2   | 36  | 16217 | 71   | 12.71753 | 0.01077  |
| midnightb   | 7901 OHGUCHI_LIVER_HNF4A_TARGETS_UP               | 2   | 36  | 16217 | 71   | 12.71753 | 0.01077  |
| red         | 1388 PROTEIN_DIMERIZATION_ACTIVITY                | 11  | 153 | 16100 | 524  | 2.229993 | 0.010781 |

|            |                                                   |     |      |       |      |          |          |
|------------|---------------------------------------------------|-----|------|-------|------|----------|----------|
| red        | 9684 GSE29618_PRE_VS_DAY7_FLU_VACCINE_MDC_UP      | 11  | 153  | 16100 | 524  | 2.229993 | 0.010781 |
| salmon     | 8533 GSE13306_TREG_VS_TCONV_LAMINA_PROPRIA_DN     | 5   | 170  | 16083 | 127  | 3.764011 | 0.010784 |
| magenta    | 8260 MEK_UP.V1_UP                                 | 6   | 180  | 16073 | 167  | 3.244112 | 0.010787 |
| lightgreen | 2246 RYTTCTG_V\$ETS2_B                            | 7   | 960  | 15293 | 42   | 2.821701 | 0.010791 |
| turquoise  | 8717 GSE14769_UNSTIM_VS_40MIN_LPS_BMDM_DN         | 63  | 189  | 16064 | 4169 | 1.299512 | 0.010792 |
| turquoise  | 9242 GSE18791_UNSTIM_VS_NEWCATSLE_VIRUS_DC_6H_UI  | 63  | 189  | 16064 | 4169 | 1.299512 | 0.010792 |
| turquoise  | 9981 GSE3982_EOSINOPHIL_VS_BASOPHIL_DN            | 63  | 189  | 16064 | 4169 | 1.299512 | 0.010792 |
| turquoise  | 10280 GSE9988_LPS_VS_LPS_AND_ANTI_TREM1_MONOCYTE  | 63  | 189  | 16064 | 4169 | 1.299512 | 0.010792 |
| lightcyan  | 7414 HAN_SATB1_TARGETS_UP                         | 5   | 351  | 15902 | 62   | 3.734262 | 0.010808 |
| brown      | 1819 V\$HEB_Q6                                    | 42  | 219  | 16034 | 2190 | 1.423294 | 0.010833 |
| lightgreen | 3595 MODULE_107                                   | 2   | 61   | 16192 | 42   | 12.68774 | 0.010833 |
| lightgreen | 3961 PID_IL12_2PATHWAY                            | 2   | 61   | 16192 | 42   | 12.68774 | 0.010833 |
| lightgreen | 9431 GSE24142_ADULT_VS_FETAL_DN3_THYMOCYTE_DN     | 3   | 178  | 16075 | 42   | 6.522071 | 0.010842 |
| purple     | 6527 BROWNE_HCMV_INFECTION_20HR_DN                | 4   | 89   | 16164 | 157  | 4.652687 | 0.010844 |
| pink       | 2276 GGGTGRRR_V\$PAX4_03                          | 25  | 1093 | 15160 | 228  | 1.630491 | 0.010847 |
| red        | 9545 GSE27786_LSK_VS_MONO_MAC_DN                  | 12  | 174  | 16079 | 524  | 2.139116 | 0.010861 |
| brown      | 5259 OUELLET_OVARIAN_CANCER_INVASIVE_VS_LMP_UP    | 25  | 116  | 16137 | 2190 | 1.599453 | 0.010863 |
| blue       | 2265 CACGTG_V\$MYC_Q2                             | 196 | 922  | 15331 | 2978 | 1.160203 | 0.010871 |
| purple     | 59 MEMBRANE                                       | 25  | 1601 | 14652 | 157  | 1.616525 | 0.010871 |
| brown      | 777 VESICLE_MEDIATED_TRANSPORT                    | 36  | 182  | 16071 | 2190 | 1.467981 | 0.010872 |
| brown      | 10032 GSE3982_MAC_VS_BCELL_UP                     | 36  | 182  | 16071 | 2190 | 1.467981 | 0.010872 |
| red        | 5054 TONKS_TARGETS_OF_RUNX1_RUNX1T1_FUSION_SUST   | 5   | 42   | 16211 | 524  | 3.692521 | 0.010873 |
| blue       | 7925 BHAT_ESR1_TARGETS_VIA_AKT1_UP                | 60  | 247  | 16006 | 2978 | 1.325755 | 0.010904 |
| turquoise  | 804 NEGATIVE_REGULATION_OF_RNA_METABOLIC_PROCE    | 41  | 115  | 16138 | 4169 | 1.389913 | 0.010911 |
| cyan       | 8565 GSE13484_UNSTIM_VS_12H_YF17D_VACCINE_STIM_PI | 4   | 182  | 16071 | 77   | 4.639075 | 0.010915 |
| cyan       | 8863 GSE17721_CTRL_VS_POLYIC_24H_BMDM_DN          | 4   | 182  | 16071 | 77   | 4.639075 | 0.010915 |
| red        | 4206 REACTOME_PPARA_ACTIVATES_GENE_EXPRESSION     | 8   | 94   | 16159 | 524  | 2.63976  | 0.01092  |
| green      | 5253 GAUSSMANN_MLL_AF4_FUSION_TARGETS_G_UP        | 24  | 182  | 16071 | 1305 | 1.642339 | 0.010934 |
| purple     | 5012 TAKEDA_TARGETS_OF_NUP98_HOXA9_FUSION_8D_UF   | 5   | 138  | 16115 | 157  | 3.750808 | 0.010945 |
| purple     | 6158 BROCKE_APOPTOSIS_REVERSED_BY_IL6             | 5   | 138  | 16115 | 157  | 3.750808 | 0.010945 |
| purple     | 8289 ESC_V6.5_UP_EARLY.V1_DN                      | 5   | 138  | 16115 | 157  | 3.750808 | 0.010945 |
| blue       | 1807 V\$SP3_Q3                                    | 53  | 214  | 16039 | 2978 | 1.351671 | 0.010945 |
| blue       | 3756 MODULE_299                                   | 12  | 33   | 16220 | 2978 | 1.984614 | 0.010953 |
| blue       | 4311 REACTOME_DOWNSTREAM_TCR_SIGNALING            | 12  | 33   | 16220 | 2978 | 1.984614 | 0.010953 |
| blue       | 4460 REACTOME_TRANSPORT_OF_MATURE_MRNA_DERIVEI    | 12  | 33   | 16220 | 2978 | 1.984614 | 0.010953 |
| turquoise  | 1410 SMALL_CONJUGATING_PROTEIN_LIGASE_ACTIVITY    | 21  | 51   | 16202 | 4169 | 1.60528  | 0.010959 |
| brown      | 2526 GCM_ING1                                     | 16  | 65   | 16188 | 2190 | 1.826821 | 0.010961 |
| brown      | 2829 KEGG_VEGF_SIGNALING_PATHWAY                  | 16  | 65   | 16188 | 2190 | 1.826821 | 0.010961 |
| red        | 4808 PICCALUGA_ANGIOIMMUNOBLASTIC_LYMPHOMA_DN     | 10  | 133  | 16120 | 524  | 2.332118 | 0.010962 |
| purple     | 8115 PHONG_TNF_RESPONSE_NOT_VIA_P38               | 8   | 312  | 15941 | 157  | 2.654418 | 0.010969 |
| brown      | 9974 GSE3982_EOSINOPHIL_VS_MAC_UP                 | 35  | 176  | 16077 | 2190 | 1.475859 | 0.010978 |
| blue       | 8651 GSE14308_TH17_VS_NATURAL_TREG_DN             | 47  | 186  | 16067 | 2978 | 1.379094 | 0.010979 |
| turquoise  | 1664 V\$WHN_B                                     | 65  | 196  | 16057 | 4169 | 1.292882 | 0.010991 |
| turquoise  | 8665 GSE1432_1H_VS_6H_IFNG_MICROGLIA_DN           | 65  | 196  | 16057 | 4169 | 1.292882 | 0.010991 |
| turquoise  | 9961 GSE3982_MEMORY_CD4_TCELL_VS_TH2_DN           | 65  | 196  | 16057 | 4169 | 1.292882 | 0.010991 |
| midnightb  | 9376 GSE22886_NAIVE_CD4_TCELL_VS_NEUTROPHIL_UP    | 4   | 198  | 16055 | 71   | 4.624555 | 0.011003 |
| yellow     | 947 MALE_GONAD_DEVELOPMENT                        | 3   | 6    | 16247 | 1426 | 5.698808 | 0.011007 |
| yellow     | 5522 OHASHI_AURKA_TARGETS                         | 3   | 6    | 16247 | 1426 | 5.698808 | 0.011007 |
| tan        | 185 NUCLEOLAR_PART                                | 2   | 18   | 16235 | 145  | 12.45441 | 0.011013 |
| tan        | 902 RIBOSOME_BIOGENESIS_AND_ASSEMBLY              | 2   | 18   | 16235 | 145  | 12.45441 | 0.011013 |
| tan        | 7055 SMID_BREAST_CANCER_RELAPSE_IN_LUNG_DN        | 2   | 18   | 16235 | 145  | 12.45441 | 0.011013 |
| yellow     | 5305 LUI_THYROID_CANCER_PAX8_PPARG_DN             | 9   | 43   | 16210 | 1426 | 2.385547 | 0.011015 |
| magenta    | 335 POSITIVE_REGULATION_OF_IMMUNE_SYSTEM_PROCE    | 3   | 45   | 16208 | 167  | 6.488224 | 0.011024 |
| magenta    | 728 REGULATION_OF_RESPONSE_TO_STIMULUS            | 3   | 45   | 16208 | 167  | 6.488224 | 0.011024 |
| magenta    | 2150 CAGTCAC,MIR-134                              | 3   | 45   | 16208 | 167  | 6.488224 | 0.011024 |
| magenta    | 7520 BOYVAULT_LIVER_CANCER_SUBCLASS_G123_UP       | 3   | 45   | 16208 | 167  | 6.488224 | 0.011024 |
| turquoise  | 2210 WTGAAAT_UNKNOWN                              | 143 | 471  | 15782 | 4169 | 1.183632 | 0.011028 |
| salmon     | 6366 MOREAUX_MULTIPLE_MYELOMA_BY_TACI_DN          | 5   | 171  | 16082 | 127  | 3.741999 | 0.011041 |
| brown      | 4747 REACTOME_CYTOKINE_SIGNALING_IN_IMMUNE_SYSTE  | 45  | 238  | 16015 | 2190 | 1.403217 | 0.011049 |
| grey60     | 8258 LTE2_UP.V1_UP                                | 3   | 171  | 16082 | 44   | 6.480463 | 0.01105  |

|            |                                                    |     |     |       |      |          |          |
|------------|----------------------------------------------------|-----|-----|-------|------|----------|----------|
| grey60     | 9852 GSE360_T_GONDII_VS_M_TUBERCULOSIS_DC_UP       | 3   | 171 | 16082 | 44   | 6.480463 | 0.01105  |
| magenta    | 9618 GSE28237_FOLLICULAR_VS_EARLY_GC_BCELL_UP      | 6   | 181 | 16072 | 167  | 3.226189 | 0.011065 |
| magenta    | 9679 GSE29618_PRE_VS_DAY7_FLU_VACCINE_BCELL_DN     | 6   | 181 | 16072 | 167  | 3.226189 | 0.011065 |
| yellow     | 9900 GSE36392_MAC_VS_NEUTROPHIL_IL25_TREATED_LUN   | 27  | 194 | 16059 | 1426 | 1.586266 | 0.011079 |
| blue       | 2197 TGCGCANK_UNKNOWN                              | 113 | 505 | 15748 | 2978 | 1.221226 | 0.011089 |
| yellow     | 9460 GSE24634_IL4_VS_CTRL_TREATED_NAIVE_CD4_TCELL_ | 26  | 185 | 16068 | 1426 | 1.601827 | 0.011093 |
| turquoise  | 768 GOLGI_VESICLE_TRANSPORT                        | 20  | 48  | 16205 | 4169 | 1.62439  | 0.011104 |
| grey60     | 5586 SEITZ_NEOPLASTIC_TRANSFORMATION_BY_8P_DELETI  | 2   | 59  | 16194 | 44   | 12.52157 | 0.011113 |
| greenyello | 2118 GAGCTGG,MIR-337                               | 5   | 145 | 16108 | 150  | 3.736322 | 0.011118 |
| cyan       | 8368 KRAS.600.LUNG.BREAST_UP.V1_DN                 | 4   | 183 | 16070 | 77   | 4.613725 | 0.011119 |
| cyan       | 8727 GSE14769_UNSTIM_VS_360MIN_LPS_BMDM_DN         | 4   | 183 | 16070 | 77   | 4.613725 | 0.011119 |
| cyan       | 9425 GSE24142_DN2_VS_DN3_THYMOCYTE_FETAL_DN        | 4   | 183 | 16070 | 77   | 4.613725 | 0.011119 |
| purple     | 3959 PID_PTP1BPATHWAY                              | 3   | 48  | 16205 | 157  | 6.470143 | 0.011131 |
| purple     | 7104 ZHENG_GLIOMASTOMA_PLASTICITY_DN               | 3   | 48  | 16205 | 157  | 6.470143 | 0.011131 |
| purple     | 7461 CROONQUIST_STROMAL_STIMULATION_UP             | 3   | 48  | 16205 | 157  | 6.470143 | 0.011131 |
| purple     | 7670 VANTVEER_BREAST_CANCER_POOR_PROGNOSIS         | 3   | 48  | 16205 | 157  | 6.470143 | 0.011131 |
| turquoise  | 255 PHOSPHOLIPID_BIOSYNTHETIC_PROCESS              | 17  | 39  | 16214 | 4169 | 1.699362 | 0.011162 |
| turquoise  | 1974 TAGGTCA,MIR-192,MIR-215                       | 17  | 39  | 16214 | 4169 | 1.699362 | 0.011162 |
| cyan       | 944 TRANSCRIPTION_FROM_RNA_POLYMERASE_II_PROMC     | 6   | 396 | 15857 | 77   | 3.19815  | 0.011169 |
| tan        | 1427 NUCLEASE_ACTIVITY                             | 3   | 52  | 16201 | 145  | 6.466711 | 0.011173 |
| lightcyan  | 5796 NAKAYAMA_FRA2_TARGETS                         | 2   | 42  | 16211 | 62   | 12.4831  | 0.011176 |
| lightgreen | 513 CYTOKINE_PRODUCTION                            | 2   | 62  | 16191 | 42   | 12.4831  | 0.011176 |
| greenyello | 951 G_PROTEIN_COUPLED_RECEPTOR_PROTEIN_SIGNALIN    | 6   | 202 | 16051 | 150  | 3.218416 | 0.011178 |
| greenyello | 8078 PLASARI_TGFB1_TARGETS_10HR_DN                 | 6   | 202 | 16051 | 150  | 3.218416 | 0.011178 |
| red        | 9385 GSE22886_TH1_VS_TH2_48H_ACT_DN                | 13  | 196 | 16057 | 524  | 2.057262 | 0.011179 |
| turquoise  | 1951 TGGTGCT,MIR-29A,MIR-29B,MIR-29C               | 141 | 464 | 15789 | 4169 | 1.184685 | 0.011118 |
| turquoise  | 4892 GARY_CD5_TARGETS_UP                           | 141 | 464 | 15789 | 4169 | 1.184685 | 0.011118 |
| blue       | 870 PIGMENT_METABOLIC_PROCESS                      | 7   | 15  | 16238 | 2978 | 2.546922 | 0.011181 |
| blue       | 3991 PID_CIRCADIANPATHWAY                          | 7   | 15  | 16238 | 2978 | 2.546922 | 0.011181 |
| red        | 3316 chr10q26                                      | 7   | 76  | 16177 | 524  | 2.856845 | 0.011185 |
| purple     | 9422 GSE24142_EARLY_THYMIC_PROGENITOR_VS_DN3_THY   | 6   | 193 | 16060 | 157  | 3.21831  | 0.011185 |
| purple     | 9447 GSE24634_TREG_VS_TCONV_POST_DAY10_IL4_CONVE   | 6   | 193 | 16060 | 157  | 3.21831  | 0.011185 |
| turquoise  | 6625 SESTO_RESPONSE_TO_UV_C0                       | 37  | 102 | 16151 | 4169 | 1.414175 | 0.011186 |
| midnightb  | 9346 GSE22886_DAY0_VS_DAY1_MONOCYTE_IN_CULTURE_    | 4   | 199 | 16054 | 71   | 4.601316 | 0.011193 |
| turquoise  | 2748 KEGG_N_GLYCAN_BIOSYNTHESIS                    | 19  | 45  | 16208 | 4169 | 1.646049 | 0.011195 |
| brown      | 7929 JOHNSTONE_PARVB_TARGETS_2_UP                  | 28  | 134 | 16119 | 2190 | 1.550753 | 0.011201 |
| turquoise  | 3543 MODULE_54                                     | 80  | 248 | 16005 | 4169 | 1.257593 | 0.011205 |
| black      | 5952 SAKAI_CHRONIC_HEPATITIS_VS_LIVER_CANCER_DN    | 3   | 27  | 16226 | 283  | 6.381233 | 0.011217 |
| turquoise  | 2028 TGAGATT,MIR-216                               | 33  | 89  | 16164 | 4169 | 1.445525 | 0.01122  |
| grey60     | 8077 PLASARI_TGFB1_TARGETS_10HR_UP                 | 3   | 172 | 16081 | 44   | 6.442785 | 0.011226 |
| purple     | 7883 FIGUEROA_AML_METHYLATION_CLUSTER_3_UP         | 5   | 139 | 16114 | 157  | 3.723823 | 0.011267 |
| lightgreen | 3563 MODULE_75                                     | 4   | 340 | 15913 | 42   | 4.552661 | 0.011267 |
| cyan       | 5964 SHIN_B_CELL_LYMPHOMA_CLUSTER_8                | 2   | 34  | 16219 | 77   | 12.41635 | 0.011268 |
| cyan       | 6933 HELLER_SILENCED_BY_METHYLATION_DN             | 3   | 98  | 16155 | 77   | 6.461569 | 0.011268 |
| blue       | 1343 STRUCTURE_SPECIFIC_DNA_BINDING                | 17  | 53  | 16200 | 2978 | 1.75058  | 0.011273 |
| blue       | 3986 PID_CD8TCRPATHWAY                             | 17  | 53  | 16200 | 2978 | 1.75058  | 0.011273 |
| green      | 876 REGULATION_OF_TRANSPORT                        | 10  | 55  | 16198 | 1305 | 2.264437 | 0.011287 |
| turquoise  | 1216 ENZYME_REGULATOR_ACTIVITY                     | 88  | 276 | 15977 | 4169 | 1.243012 | 0.0113   |
| lightcyan  | 658 MEMBRANE_ORGANIZATION_AND_BIOGENESIS           | 3   | 122 | 16131 | 62   | 6.446192 | 0.011313 |
| cyan       | 8093 KRIEG_KDM3A_TARGETS_NOT_HYPOXIA               | 4   | 184 | 16069 | 77   | 4.58865  | 0.011327 |
| cyan       | 8965 GSE17721_PAM3CSK4_VS_CPG_24H_BMDM_DN          | 4   | 184 | 16069 | 77   | 4.58865  | 0.011327 |
| cyan       | 9050 GSE17721_LPS_VS_CPG_12H_BMDM_UP               | 4   | 184 | 16069 | 77   | 4.58865  | 0.011327 |
| cyan       | 9957 GSE3982_CTRL_VS_LPS_48H_DC_DN                 | 4   | 184 | 16069 | 77   | 4.58865  | 0.011327 |
| red        | 8988 GSE17721_LPS_VS_PAM3CSK4_2H_BMDM_UP           | 12  | 175 | 16078 | 524  | 2.126892 | 0.011332 |
| lightgreen | 8569 GSE13484_12H_UNSTIM_VS_YF17D_VACCINE_STIM_PI  | 3   | 181 | 16072 | 42   | 6.41397  | 0.011342 |
| lightgreen | 9203 GSE17974_IL4_AND_ANTI_IL12_VS_UNTREATED_72H_  | 3   | 181 | 16072 | 42   | 6.41397  | 0.011342 |
| magenta    | 6332 ALCALAY_AML_BY_NPM1_LOCALIZATION_DN           | 6   | 182 | 16071 | 167  | 3.208462 | 0.011348 |
| red        | 5713 KARAKAS_TGFB1_SIGNALING                       | 3   | 15  | 16238 | 524  | 6.203435 | 0.011353 |
| red        | 7953 KIM_PTEN_TARGETS_UP                           | 3   | 15  | 16238 | 524  | 6.203435 | 0.011353 |
| green      | 3925 PID_FANCONI_PATHWAY                           | 9   | 47  | 16206 | 1305 | 2.384886 | 0.01137  |

|            |                                                   |     |      |       |      |          |          |
|------------|---------------------------------------------------|-----|------|-------|------|----------|----------|
| black      | 5106 ELVIDGE_HYPOXIA_DN                           | 7   | 140  | 16113 | 283  | 2.871555 | 0.011371 |
| brown      | 6934 HELLER_HDAC_TARGETS_UP                       | 53  | 289  | 15964 | 2190 | 1.361029 | 0.011384 |
| turquoise  | 1000 GENE_SILENCING                               | 6   | 9    | 16244 | 4169 | 2.599025 | 0.011397 |
| turquoise  | 1141 SMALL_CONJUGATING_PROTEIN_SPECIFIC_PROTEASE_ | 6   | 9    | 16244 | 4169 | 2.599025 | 0.011397 |
| blue       | 5973 MORI_SMALL_PRE_BII_LYMPHOCYTE_DN             | 22  | 74   | 16179 | 2978 | 1.622556 | 0.011399 |
| turquoise  | 3624 MODULE_136                                   | 132 | 432  | 15821 | 4169 | 1.19122  | 0.011402 |
| magenta    | 3642 MODULE_157                                   | 4   | 85   | 16168 | 167  | 4.579923 | 0.011428 |
| brown      | 877 RECEPTOR_MEDIATED_ENDOCYTOSIS                 | 9   | 29   | 16224 | 2190 | 2.303212 | 0.011446 |
| brown      | 5327 LANG_MYB_FAMILY_TARGETS                      | 9   | 29   | 16224 | 2190 | 2.303212 | 0.011446 |
| brown      | 6292 NEMETH_INFLAMMATORY_RESPONSE_LPS_DN          | 9   | 29   | 16224 | 2190 | 2.303212 | 0.011446 |
| red        | 7895 PANGAS_TUMOR_SUPPRESSION_BY_SMAD1_AND_SM.    | 9   | 114  | 16139 | 524  | 2.448724 | 0.011447 |
| purple     | 9441 GSE24634_TREG_VS_TCONV_POST_DAY3_IL4_CONVERT | 6   | 194  | 16059 | 157  | 3.20172  | 0.011453 |
| blue       | 4851 SOTIRIOU_BREAST_CANCER_GRADE_1_VS_3_DN       | 16  | 49   | 16204 | 2978 | 1.782103 | 0.011455 |
| blue       | 655 SECONDARY_METABOLIC_PROCESS                   | 9   | 22   | 16231 | 2978 | 2.232691 | 0.011457 |
| blue       | 4526 REACTOME_DOUBLE_STRAND_BREAK_REPAIR          | 9   | 22   | 16231 | 2978 | 2.232691 | 0.011457 |
| magenta    | 1450 EXTRACELLULAR_MATRIX_STRUCTURAL_CONSTITUENT  | 2   | 16   | 16237 | 167  | 12.16542 | 0.011457 |
| magenta    | 3011 BIOCARTA_INTRINSIC_PATHWAY                   | 2   | 16   | 16237 | 167  | 12.16542 | 0.011457 |
| magenta    | 3240 chr6p23                                      | 2   | 16   | 16237 | 167  | 12.16542 | 0.011457 |
| magenta    | 5300 VETTER_TARGETS_OF_PRKCA_AND_ETS1_UP          | 2   | 16   | 16237 | 167  | 12.16542 | 0.011457 |
| magenta    | 8087 ROLEF_G LIS3_TARGETS                         | 2   | 16   | 16237 | 167  | 12.16542 | 0.011457 |
| brown      | 771 PROTEIN_PROCESSING                            | 12  | 44   | 16209 | 2190 | 2.024035 | 0.011465 |
| brown      | 3012 BIOCARTA_KERATINOCYTE_PATHWAY                | 12  | 44   | 16209 | 2190 | 2.024035 | 0.011465 |
| purple     | 1120 HEPARIN_BINDING                              | 2   | 17   | 16236 | 157  | 12.17909 | 0.011465 |
| purple     | 6732 NIELSEN_LEIOMYOSARCOMA_UP                    | 2   | 17   | 16236 | 157  | 12.17909 | 0.011465 |
| purple     | 7951 ZHU_SKIL_TARGETS_UP                          | 2   | 17   | 16236 | 157  | 12.17909 | 0.011465 |
| midnightb  | 1931 V\$PR_02                                     | 3   | 107  | 16146 | 71   | 6.418191 | 0.011467 |
| turquoise  | 1984 GACTGTT,MIR-212,MIR-132                      | 49  | 142  | 16111 | 4169 | 1.34527  | 0.011494 |
| green      | 9512 GSE2706_R848_VS_LPS_8H_STIM_DC_UP            | 19  | 135  | 16118 | 1305 | 1.752842 | 0.011514 |
| lightgreen | 5029 AKL_HTLV1_INFECTION_DN                       | 2   | 63   | 16190 | 42   | 12.28496 | 0.011524 |
| lightgreen | 5166 KOKKINAKIS_METHIONINE_DEPRIVATION_48HR_DN    | 2   | 63   | 16190 | 42   | 12.28496 | 0.011524 |
| lightgreen | 6414 NATSUME_RESPONSE_TO_INTERFERON_BETA_UP       | 2   | 63   | 16190 | 42   | 12.28496 | 0.011524 |
| cyan       | 8891 GSE17721_CTRL_VS_CPG_8H_BMDM_DN              | 4   | 185  | 16068 | 77   | 4.563847 | 0.011536 |
| cyan       | 9086 GSE17721_LPS_VS_GARDIQUIMOD_12H_BMDM_UP      | 4   | 185  | 16068 | 77   | 4.563847 | 0.011536 |
| salmon     | 48 SMALL_NUCLEAR_RIBONUCLEOPROTEIN_COMPLEX        | 2   | 21   | 16232 | 127  | 12.18823 | 0.011544 |
| salmon     | 3237 chr8q12                                      | 2   | 21   | 16232 | 127  | 12.18823 | 0.011544 |
| salmon     | 6097 IIZUKA_LIVER_CANCER_PROGRESSION_LO_L1_DN     | 2   | 21   | 16232 | 127  | 12.18823 | 0.011544 |
| blue       | 6878 SANSOM_WNT_PATHWAY_REQUIRE_MYC               | 15  | 45   | 16208 | 2978 | 1.81923  | 0.011546 |
| salmon     | 6541 KAYO_AGING_MUSCLE_DN                         | 4   | 112  | 16141 | 127  | 4.570585 | 0.011548 |
| turquoise  | 6329 AFFAR_YY1_TARGETS_DN                         | 64  | 193  | 16060 | 4169 | 1.292779 | 0.011573 |
| turquoise  | 8876 GSE17721_CTRL_VS_PAM3CSK4_12H_BMDM_UP        | 64  | 193  | 16060 | 4169 | 1.292779 | 0.011573 |
| turquoise  | 8906 GSE17721_CTRL_VS_GARDIQUIMOD_8H_BMDM_UP      | 64  | 193  | 16060 | 4169 | 1.292779 | 0.011573 |
| turquoise  | 1981 TTGGAGA,MIR-515-5P,MIR-519E                  | 46  | 132  | 16121 | 4169 | 1.358581 | 0.01158  |
| grey60     | 9970 GSE3982_EOSINOPHIL_VS_MAST_CELL_UP           | 3   | 174  | 16079 | 44   | 6.36873  | 0.011581 |
| cyan       | 3187 chr11q12                                     | 3   | 99   | 16154 | 77   | 6.396301 | 0.011581 |
| turquoise  | 3496 MODULE_3                                     | 114 | 368  | 15885 | 4169 | 1.207699 | 0.011583 |
| red        | 3813 MODULE_375                                   | 6   | 59   | 16194 | 524  | 3.154289 | 0.011593 |
| purple     | 9191 GSE17974_IL4_AND_ANTI_IL12_VS_UNTREATED_2H_A | 5   | 140  | 16113 | 157  | 3.697225 | 0.011596 |
| greenyello | 4108 PID_CD8TCRDOWNSTREAMPATHWAY                  | 3   | 51   | 16202 | 150  | 6.373725 | 0.011612 |
| red        | 8507 GSE12845_IGD_POS_BLOOD_VS_NAIVE_TONSIL_BCELL | 13  | 197  | 16056 | 524  | 2.046819 | 0.01163  |
| red        | 8558 GSE13411_SWITCHED_MEMORY_BCELL_VS_PLASMA_C   | 13  | 197  | 16056 | 524  | 2.046819 | 0.01163  |
| magenta    | 9501 GSE2706_UNSTIM_VS_8H_R848_DC_DN              | 6   | 183  | 16070 | 167  | 3.19093  | 0.011635 |
| cyan       | 7988 LEE_BMP2_TARGETS_UP                          | 8   | 650  | 15603 | 77   | 2.597882 | 0.011659 |
| brown      | 6442 BLALOCK_ALZHEIMERS_DISEASE_DN                | 178 | 1128 | 15125 | 2190 | 1.171117 | 0.011664 |
| lightgreen | 1778 V\$AFP1_Q6                                   | 3   | 183  | 16070 | 42   | 6.343872 | 0.011682 |
| lightgreen | 8677 GSE14350_IL2RB_KO_VS_WT_TEFF_DN              | 3   | 183  | 16070 | 42   | 6.343872 | 0.011682 |
| lightgreen | 8829 GSE17580_UNINFECTED_VS_S_MANSONI_INF_TEFF_DI | 3   | 183  | 16070 | 42   | 6.343872 | 0.011682 |
| lightgreen | 9960 GSE3982_MEMORY_CD4_TCELL_VS_TH2_UP           | 3   | 183  | 16070 | 42   | 6.343872 | 0.011682 |
| turquoise  | 367 BIOSYNTHETIC_PROCESS                          | 128 | 418  | 15835 | 4169 | 1.19381  | 0.011683 |
| brown      | 8550 GSE13411_NAIVE_BCELL_VS_PLASMA_CELL_UP       | 37  | 189  | 16064 | 2190 | 1.452879 | 0.011683 |
| brown      | 353 SECRETION_BY_CELL                             | 23  | 105  | 16148 | 2190 | 1.625653 | 0.011683 |

|            |                                                     |    |     |       |      |          |          |
|------------|-----------------------------------------------------|----|-----|-------|------|----------|----------|
| lightcyan  | 3375 chr2p25                                        | 2  | 43  | 16210 | 62   | 12.1928  | 0.011693 |
| lightcyan  | 7222 CROMER_TUMORIGENESIS_UP                        | 2  | 43  | 16210 | 62   | 12.1928  | 0.011693 |
| lightcyan  | 7452 MILI_PSEUDOPODIA                               | 2  | 43  | 16210 | 62   | 12.1928  | 0.011693 |
| brown      | 2080 CCTGCTG,MIR-214                                | 42 | 220 | 16033 | 2190 | 1.416824 | 0.011693 |
| purple     | 8052 PEDERSEN_METASTASIS_BY_ERBB2_ISOFORM_4         | 4  | 91  | 16162 | 157  | 4.55043  | 0.011696 |
| brown      | 2876 KEGG_EPITHELIAL_CELL_SIGNALING_IN_HELICOBACTER | 15 | 60  | 16193 | 2190 | 1.855365 | 0.011708 |
| blue       | 9867 GSE360_L_DONOVANI_VS_B_MALAYI_LOW_DOSE_MA      | 46 | 182 | 16071 | 2978 | 1.379416 | 0.011713 |
| blue       | 9999 GSE3982_MAST_CELL_VS_BCELL_DN                  | 46 | 182 | 16071 | 2978 | 1.379416 | 0.011713 |
| turquoise  | 3017 BIOCARTA_MAPK_PATHWAY                          | 32 | 86  | 16167 | 4169 | 1.450618 | 0.011713 |
| green      | 217 COLLAGEN                                        | 5  | 18  | 16235 | 1305 | 3.459557 | 0.011714 |
| green      | 284 NEGATIVE_REGULATION_OF_DNA_METABOLIC_PROCE      | 5  | 18  | 16235 | 1305 | 3.459557 | 0.011714 |
| green      | 1390 TRANSFERASE_ACTIVITY_TRANSFERRING_PENTOSYL_GI  | 5  | 18  | 16235 | 1305 | 3.459557 | 0.011714 |
| green      | 3102 BIOCARTA_CTLA4_PATHWAY                         | 5  | 18  | 16235 | 1305 | 3.459557 | 0.011714 |
| green      | 3882 MODULE_489                                     | 5  | 18  | 16235 | 1305 | 3.459557 | 0.011714 |
| green      | 4834 DAVICIONI_PAX_FOXO1_SIGNATURE_IN_ARMS_DN       | 5  | 18  | 16235 | 1305 | 3.459557 | 0.011714 |
| green      | 6682 BANDRES_RESPONSE_TO_CARMUSTIN_WITHOUT_MGI      | 5  | 18  | 16235 | 1305 | 3.459557 | 0.011714 |
| brown      | 3035 BIOCARTA_P38MAPK_PATHWAY                       | 11 | 39  | 16214 | 2190 | 2.093233 | 0.011724 |
| brown      | 7916 WIERENGA_PML_INTERACTOME                       | 11 | 39  | 16214 | 2190 | 2.093233 | 0.011724 |
| purple     | 5099 KIM_WT1_TARGETS_UP                             | 6  | 195 | 16058 | 157  | 3.185301 | 0.011725 |
| purple     | 6921 KONDO_EZH2_TARGETS                             | 6  | 195 | 16058 | 157  | 3.185301 | 0.011725 |
| purple     | 8686 GSE1460_INTRATHYMIC_T_PROGENITOR_VS_CD4_THY    | 6  | 195 | 16058 | 157  | 3.185301 | 0.011725 |
| blue       | 3161 chr12q24                                       | 49 | 196 | 16057 | 2978 | 1.364422 | 0.011736 |
| blue       | 9236 GSE18791_CTRL_VS_NEWCASTLE_VIRUS_DC_18H_UP     | 49 | 196 | 16057 | 2978 | 1.364422 | 0.011736 |
| greenyello | 10217 GSE8515_CTRL_VS_IL6_4H_STIM_MAC_DN            | 5  | 147 | 16106 | 150  | 3.685488 | 0.011746 |
| cyan       | 8817 GSE16522_MEMORY_VS_NAIVE_ANTI_CD3CD28_STIM     | 4  | 186 | 16067 | 77   | 4.53931  | 0.011748 |
| greenyello | 802 ESTABLISHMENT_AND_OR_MAINTENANCE_OF_CELL_P      | 2  | 18  | 16235 | 150  | 12.03926 | 0.01175  |
| greenyello | 7165 CLIMENT_BREAST_CANCER_COPY_NUMBER_UP           | 2  | 18  | 16235 | 150  | 12.03926 | 0.01175  |
| greenyello | 7774 ZEMBUTSU_SENSITIVITY_TO_CISPLATIN              | 2  | 18  | 16235 | 150  | 12.03926 | 0.01175  |
| brown      | 2926 BIOCARTA_BCR_PATHWAY                           | 10 | 34  | 16219 | 2190 | 2.182783 | 0.011755 |
| purple     | 2877 KEGG_PATHOGENIC_ESCHERICHIA_COLI_INFECTION     | 3  | 49  | 16204 | 157  | 6.3381   | 0.011774 |
| purple     | 3754 MODULE_297                                     | 3  | 49  | 16204 | 157  | 6.3381   | 0.011774 |
| purple     | 3801 MODULE_357                                     | 3  | 49  | 16204 | 157  | 6.3381   | 0.011774 |
| purple     | 7873 DEMAGALHAES_AGING_UP                           | 3  | 49  | 16204 | 157  | 6.3381   | 0.011774 |
| yellow     | 1240 N_METHYLTRANSFERASE_ACTIVITY                   | 4  | 11  | 16242 | 1426 | 4.144588 | 0.011779 |
| yellow     | 4775 REACTOME_RESOLUTION_OF_AP_SITES_VIA_THE_SINC   | 4  | 11  | 16242 | 1426 | 4.144588 | 0.011779 |
| pink       | 6401 LEE_AGING_NEOCORTEX_DN                         | 4  | 63  | 16190 | 228  | 4.526037 | 0.01178  |
| pink       | 7129 MATZUK_SPERMATOCYTE                            | 4  | 63  | 16190 | 228  | 4.526037 | 0.01178  |
| pink       | 7980 DELPUECH_FOXO3_TARGETS_UP                      | 4  | 63  | 16190 | 228  | 4.526037 | 0.01178  |
| pink       | 6340 HOEGERKORP_CD44_TARGETS_DIRECT_DN              | 2  | 12  | 16241 | 228  | 11.88085 | 0.011787 |
| brown      | 6947 COATES_MACROPHAGE_M1_VS_M2_DN                  | 17 | 71  | 16182 | 2190 | 1.77697  | 0.011797 |
| brown      | 7200 HUANG_DASATINIB_RESISTANCE_UP                  | 17 | 71  | 16182 | 2190 | 1.77697  | 0.011797 |
| red        | 6139 UEDA_PERIFERAL_CLOCK                           | 11 | 155 | 16098 | 524  | 2.201219 | 0.011807 |
| red        | 9723 GSE30962_PRIMARY_VS_SECONDARY_ACUTE_LCMV_II    | 12 | 176 | 16077 | 524  | 2.114807 | 0.011818 |
| red        | 9965 GSE3982_DC_VS_MAC_LPS_STIM_DN                  | 12 | 176 | 16077 | 524  | 2.114807 | 0.011818 |
| yellow     | 9209 GSE17974_2H_VS_72H_UNTREATED_IN_VITRO_CD4_T    | 27 | 195 | 16058 | 1426 | 1.578131 | 0.011819 |
| yellow     | 9551 GSE27786_LIN_NEG_VS_CD8_TCELL_DN               | 27 | 195 | 16058 | 1426 | 1.578131 | 0.011819 |
| lightcyan  | 7689 DANG_REGULATED_BY_MYC_DN                       | 4  | 232 | 16021 | 62   | 4.519744 | 0.011827 |
| red        | 2680 GNF2_PAK2                                      | 4  | 28  | 16225 | 524  | 4.431025 | 0.011833 |
| red        | 4649 REACTOME_ION_TRANSPORT_BY_P_TYPE_ATPASES       | 4  | 28  | 16225 | 524  | 4.431025 | 0.011833 |
| red        | 5274 WANG_BARRETTS_ESOPHAGUS_AND_ESOPHAGUS_CA       | 4  | 28  | 16225 | 524  | 4.431025 | 0.011833 |
| red        | 7113 WILENSKY_RESPONSE_TO_DARAPLADIB                | 4  | 28  | 16225 | 524  | 4.431025 | 0.011833 |
| pink       | 3781 MODULE_329                                     | 3  | 34  | 16219 | 228  | 6.289861 | 0.011836 |
| salmon     | 2310 MORF_HAT1                                      | 5  | 174 | 16079 | 127  | 3.677482 | 0.011837 |
| salmon     | 10119 GSE39820_TGFBETA1_VS_TGFBETA3_IN_IL6_TREATED_ | 5  | 174 | 16079 | 127  | 3.677482 | 0.011837 |
| salmon     | 10233 GSE9006_TYPE_1_DIABETES_AT_DX_VS_1MONTH_POS   | 5  | 174 | 16079 | 127  | 3.677482 | 0.011837 |
| yellow     | 8487 GSE11924_TH1_VS_TH2_CD4_TCELL_DN               | 25 | 177 | 16076 | 1426 | 1.609833 | 0.011851 |
| yellow     | 9387 GSE22886_IL2_VS_IL15_STIM_NKCELL_DN            | 25 | 177 | 16076 | 1426 | 1.609833 | 0.011851 |
| yellow     | 9102 GSE17721_0.5H_VS_12H_POLYIC_BMDM_UP            | 26 | 186 | 16067 | 1426 | 1.593215 | 0.011853 |
| lightgreen | 5070 SENESE_HDAC1_AND_HDAC2_TARGETS_DN              | 3  | 184 | 16069 | 42   | 6.309394 | 0.011855 |
| lightgreen | 8434 GSE10325_CD4_TCELL_VS_LUPUS_CD4_TCELL_UP       | 3  | 184 | 16069 | 42   | 6.309394 | 0.011855 |

|             |                                                    |    |      |       |      |          |          |
|-------------|----------------------------------------------------|----|------|-------|------|----------|----------|
| lightgreen  | 9958 GSE3982_MEMORY_CD4_TCELL_VS_TH1_UP            | 3  | 184  | 16069 | 42   | 6.309394 | 0.011855 |
| lightgreen  | 10158 GSE7460_CD8_TCELL_VS_TREG_ACT_UP             | 3  | 184  | 16069 | 42   | 6.309394 | 0.011855 |
| lightgreen  | 6338 CHIARETTI_ACUTE_LYMPHOBLASTIC_LEUKEMIA_ZAP70  | 2  | 64   | 16189 | 42   | 12.09301 | 0.011876 |
| pink        | 3553 MODULE_64                                     | 12 | 404  | 15849 | 228  | 2.117379 | 0.011893 |
| blue        | 2504 GCM_CBF                                       | 21 | 70   | 16183 | 2978 | 1.637307 | 0.011899 |
| salmon      | 4915 DIAZ_CHRONIC_MEYLOGENOUS_LEUKEMIA_DN          | 4  | 113  | 16140 | 127  | 4.530137 | 0.011901 |
| brown       | 1063 HYDROLASE_ACTIVITY_ACTING_ON_ACID_ANHYDRIDES  | 41 | 214  | 16039 | 2190 | 1.421869 | 0.011901 |
| magenta     | 8518 GSE12845_NAIVE_VS_PRE_GC_TONSIL_BCELL_UP      | 6  | 184  | 16069 | 167  | 3.173588 | 0.011928 |
| magenta     | 9465 GSE25087_FETAL_VS_ADULT_TREG_DN               | 6  | 184  | 16069 | 167  | 3.173588 | 0.011928 |
| purple      | 5715 SHETH_LIVER_CANCER_VS_TXNIP_LOSS_PAM2         | 5  | 141  | 16112 | 157  | 3.671003 | 0.011931 |
| purple      | 7523 CHIANG_LIVER_CANCER_SUBCLASS_CTNNB1_DN        | 5  | 141  | 16112 | 157  | 3.671003 | 0.011931 |
| grey60      | 1735 V\$TBP_01                                     | 3  | 176  | 16077 | 44   | 6.296358 | 0.011942 |
| greenyello  | 1513 V\$IK2_01                                     | 6  | 205  | 16048 | 150  | 3.171317 | 0.011956 |
| greenyello  | 1880 V\$TTF1_Q6                                    | 6  | 205  | 16048 | 150  | 3.171317 | 0.011956 |
| brown       | 9066 GSE17721_POLYIC_VS_GARDIQUIMOD_8H_BMDM_UP     | 35 | 177  | 16076 | 2190 | 1.467521 | 0.01196  |
| brown       | 9296 GSE20715_OH_VS_24H_OZONE_TLR4_KO_LUNG_UP      | 35 | 177  | 16076 | 2190 | 1.467521 | 0.01196  |
| brown       | 9956 GSE3982_CTRL_VS_LPS_48H_DC_UP                 | 35 | 177  | 16076 | 2190 | 1.467521 | 0.01196  |
| cyan        | 8563 GSE13484_UNSTIM_VS_3H_YF17D_VACCINE_STIM_PB   | 4  | 187  | 16066 | 77   | 4.515036 | 0.011963 |
| cyan        | 4926 CHARAFE_BREAST_CANCER_LUMINAL_VS_BASAL_DN     | 6  | 402  | 15851 | 77   | 3.150417 | 0.011963 |
| red         | 7015 ENGELMANN_CANCER_PROGENITORS_UP               | 5  | 43   | 16210 | 524  | 3.606648 | 0.011986 |
| red         | 7109 ZHENG_IL22_SIGNALING_UP                       | 5  | 43   | 16210 | 524  | 3.606648 | 0.011986 |
| greenyello  | 2276 GGGTGGRR_V\$PAX4_03                           | 18 | 1093 | 15160 | 150  | 1.78441  | 0.011987 |
| magenta     | 3505 MODULE_13                                     | 10 | 422  | 15831 | 167  | 2.306241 | 0.011987 |
| blue        | 1122 LIGASE_ACTIVITY                               | 27 | 96   | 16157 | 2978 | 1.534975 | 0.01199  |
| green       | 2642 GNF2_FGR                                      | 7  | 32   | 16221 | 1305 | 2.724401 | 0.011993 |
| green       | 7694 DORN_ADENOVIRUS_INFECTION_12HR_DN             | 7  | 32   | 16221 | 1305 | 2.724401 | 0.011993 |
| lightyellow | 4944 BORCZUK_MALIGNANT_MESOTHELIOMA_DN             | 2  | 82   | 16171 | 33   | 12.01256 | 0.011997 |
| lightyellow | 6694 KAYO_CALORIE_RESTRICTION_MUSCLE_UP            | 2  | 82   | 16171 | 33   | 12.01256 | 0.011997 |
| lightyellow | 7807 SASSON_RESPONSE_TO_GONADOTROPHINS_DN          | 2  | 82   | 16171 | 33   | 12.01256 | 0.011997 |
| salmon      | 61 NUCLEAR_PART                                    | 10 | 557  | 15696 | 127  | 2.297601 | 0.012023 |
| purple      | 1044 REGULATION_OF_CELL_PROLIFERATION              | 7  | 255  | 15998 | 157  | 2.841788 | 0.012028 |
| lightgreen  | 9485 GSE26669_CD4_VS_CD8_TCELL_IN_MLR_COSTIM_BLOCK | 3  | 185  | 16068 | 42   | 6.27529  | 0.012029 |
| brown       | 2822 KEGG_VASCULAR_SMOOTH_MUSCLE_CONTRACTION       | 20 | 88   | 16165 | 2190 | 1.686696 | 0.012032 |
| brown       | 3391 chr20q11                                      | 20 | 88   | 16165 | 2190 | 1.686696 | 0.012032 |
| brown       | 3438 chr14q24                                      | 20 | 88   | 16165 | 2190 | 1.686696 | 0.012032 |
| turquoise   | 382 CENTROSOME_ORGANIZATION_AND_BIOGENESIS         | 8  | 14   | 16239 | 4169 | 2.227735 | 0.012088 |
| turquoise   | 1314 ACETYLGUCOSAMINYLTRANSFERASE_ACTIVITY         | 8  | 14   | 16239 | 4169 | 2.227735 | 0.012088 |
| turquoise   | 3274 chr11p14                                      | 8  | 14   | 16239 | 4169 | 2.227735 | 0.012088 |
| turquoise   | 4052 PID_TCRJNKPATHWAY                             | 8  | 14   | 16239 | 4169 | 2.227735 | 0.012088 |
| turquoise   | 6498 VISALA_RESPONSE_TO_HEAT_SHOCK_AND_AGING_UP    | 8  | 14   | 16239 | 4169 | 2.227735 | 0.012088 |
| red         | 9640 GSE29615_CTRL_VS_DAY7_LAIV_FLU_VACCINE_PBM    | 10 | 135  | 16118 | 524  | 2.297569 | 0.012093 |
| red         | 6881 RIGGINS_TAMOXIFEN_RESISTANCE_DN               | 13 | 198  | 16055 | 524  | 2.036481 | 0.012095 |
| red         | 10072 GSE3982_BASOPHIL_VS_EFF_MEMORY_CD4_TCELL_UP  | 13 | 198  | 16055 | 524  | 2.036481 | 0.012095 |
| turquoise   | 305 REGULATION_OF_PROTEIN_KINASE_ACTIVITY          | 48 | 139  | 16114 | 4169 | 1.346257 | 0.012095 |
| green       | 8160 ACEVEDO_FGFR1_TARGETS_IN_PROSTATE_CANCER_M    | 29 | 233  | 16020 | 1305 | 1.550119 | 0.012095 |
| brown       | 2071 GGCAGCT,MIR-22                                | 40 | 208  | 16045 | 2190 | 1.427204 | 0.012105 |
| salmon      | 5152 HAHTOLA_MYCOSIS_FUNGOIDES_SKIN_UP             | 5  | 175  | 16078 | 127  | 3.656468 | 0.012111 |
| salmon      | 9794 GSE360_CTRL_VS_L_MAJOR_DC_UP                  | 5  | 175  | 16078 | 127  | 3.656468 | 0.012111 |
| magenta     | 7266 BOYLAN_MULTIPLE_MYELOMA_C_D_DN                | 7  | 240  | 16013 | 167  | 2.838598 | 0.012112 |
| lightyellow | 4142 REACTOME_SYNTHESIS_OF_BILE_ACIDS_AND_BILE_SAI | 1  | 6    | 16247 | 33   | 82.08586 | 0.012123 |
| blue        | 8505 GSE12845_IGD_POS_VS_NEG_BLOOD_BCELL_DN        | 47 | 187  | 16066 | 2978 | 1.371719 | 0.012123 |
| blue        | 9768 GSE339_CD4POS_VS_CD8POS_DC_UP                 | 47 | 187  | 16066 | 2978 | 1.371719 | 0.012123 |
| blue        | 9886 GSE360_HIGH_DOSE_B_MALAYI_VS_M_TUBERCULOSIS   | 47 | 187  | 16066 | 2978 | 1.371719 | 0.012123 |
| turquoise   | 791 ENDOSOME_TRANSPORT                             | 11 | 22   | 16231 | 4169 | 1.949268 | 0.01213  |
| turquoise   | 4554 REACTOME_TAK1_ACTIVATES_NFKB_BY_PHOSPHORYL    | 11 | 22   | 16231 | 4169 | 1.949268 | 0.01213  |
| turquoise   | 6483 VIETOR_IFRD1_TARGETS                          | 11 | 22   | 16231 | 4169 | 1.949268 | 0.01213  |
| purple      | 8377 KRAS.LUNG.BREAST_UP.V1_UP                     | 4  | 92   | 16161 | 157  | 4.500969 | 0.012138 |
| red         | 2248 RTAAACA_V\$FREAC2_01                          | 35 | 728  | 15525 | 524  | 1.49121  | 0.012148 |
| turquoise   | 2202 TNCATNTCCYR_UNKNOWN                           | 42 | 119  | 16134 | 4169 | 1.375954 | 0.012163 |
| cyan        | 8522 GSE12845_PRE_GC_VS_DARKZONE_GC_TONSIL_BCELL   | 4  | 188  | 16065 | 77   | 4.49102  | 0.01218  |

|             |       |                                               |    |     |       |      |          |          |
|-------------|-------|-----------------------------------------------|----|-----|-------|------|----------|----------|
| cyan        | 8994  | GSE17721_LPS_VS_PAM3CSK4_8H_BMDM_UP           | 4  | 188 | 16065 | 77   | 4.49102  | 0.01218  |
| cyan        | 9000  | GSE17721_LPS_VS_PAM3CSK4_24H_BMDM_UP          | 4  | 188 | 16065 | 77   | 4.49102  | 0.01218  |
| cyan        | 9770  | GSE339_CD4POS_VS_CD4CD8DN_DC_UP               | 4  | 188 | 16065 | 77   | 4.49102  | 0.01218  |
| lightgreen  | 8024  | GOBERT_OLIGODENDROCYTE_DIFFERENTIATION_DN     | 7  | 983 | 15270 | 42   | 2.75568  | 0.012193 |
| purple      | 5183  | DELYS_THYROID_CANCER_UP                       | 9  | 383 | 15870 | 157  | 2.432639 | 0.012193 |
| pink        | 9742  | GSE32423_MEMORY_VS_NAIVE_CD8_TCELL_UP         | 7  | 176 | 16077 | 228  | 2.835202 | 0.012195 |
| green       | 9869  | GSE360_L_DONOVANI_VS_M_TUBERCULOSIS_MAC_DI    | 23 | 174 | 16079 | 1305 | 1.646272 | 0.012204 |
| grey60      | 6917  | KONDO_PROSTATE_CANCER_HCP_WITH_H3K27ME3       | 2  | 62  | 16191 | 44   | 11.91569 | 0.01222  |
| grey60      | 7550  | WOO_LIVER_CANCER_RECURRENCE_DN                | 2  | 62  | 16191 | 44   | 11.91569 | 0.01222  |
| lightcyan   | 6664  | BURTON_ADIPOGENESIS_7                         | 2  | 44  | 16209 | 62   | 11.91569 | 0.01222  |
| turquoise   | 2319  | MORF_PCNA                                     | 31 | 83  | 16170 | 4169 | 1.45608  | 0.012221 |
| cyan        | 6689  | BROWNE_HCMV_INFECTION_12HR_UP                 | 3  | 101 | 16152 | 77   | 6.269641 | 0.012222 |
| magenta     | 6633  | RODWELL_AGING_KIDNEY_NO_BLOOD_UP              | 6  | 185 | 16068 | 167  | 3.156433 | 0.012226 |
| magenta     | 8506  | GSE12845_IGD_POS_BLOOD_VS_NAIVE_TONSIL_BCELL  | 6  | 185 | 16068 | 167  | 3.156433 | 0.012226 |
| magenta     | 8734  | GSE15324_NAIVE_VS_ACTIVATED_CD8_TCELL_UP      | 6  | 185 | 16068 | 167  | 3.156433 | 0.012226 |
| magenta     | 10225 | GSE9006_HEALTHY_VS_TYPE_1_DIABETES_PBMC_AT_I  | 6  | 185 | 16068 | 167  | 3.156433 | 0.012226 |
| lightgreen  | 5930  | AMIT_EGF_RESPONSE_120_HELA                    | 2  | 65  | 16188 | 42   | 11.90696 | 0.012233 |
| lightgreen  | 7705  | NAKAYAMA_SOFT_TISSUE_TUMORS_PCA1_UP           | 2  | 65  | 16188 | 42   | 11.90696 | 0.012233 |
| blue        | 2338  | MORF_SOD1                                     | 66 | 277 | 15976 | 2978 | 1.300388 | 0.012235 |
| cyan        | 3553  | MODULE_64                                     | 6  | 404 | 15849 | 77   | 3.134821 | 0.012236 |
| tan         | 1339  | EXONUCLEASE_ACTIVITY                          | 2  | 19  | 16234 | 145  | 11.79891 | 0.012237 |
| tan         | 7845  | STAMBOLSKY_RESPONSE_TO_VITAMIN_D3_DN          | 2  | 19  | 16234 | 145  | 11.79891 | 0.012237 |
| greenyello  | 7849  | KIM_BIPOLAR_DISORDER_OLIGODENDROCYTE_DENSIT   | 3  | 52  | 16201 | 150  | 6.251154 | 0.012241 |
| salmon      | 4699  | REACTOME_HIV_LIFE_CYCLE                       | 4  | 114 | 16139 | 127  | 4.490399 | 0.012261 |
| green       | 8584  | GSE13485_DAY1_VS_DAY7_YF17D_VACCINE_PBMC_UI   | 14 | 90  | 16163 | 1305 | 1.937352 | 0.012262 |
| brown       | 8594  | GSE13485_PRE_VS_POST_YF17D_VACCINATION_PBMC   | 32 | 159 | 16094 | 2190 | 1.493627 | 0.012265 |
| blue        | 2730  | KEGG_PURINE_METABOLISM                        | 37 | 141 | 16112 | 2978 | 1.43216  | 0.01227  |
| blue        | 8222  | MTOR_UP.V1_UP                                 | 37 | 141 | 16112 | 2978 | 1.43216  | 0.01227  |
| lightyellow | 7809  | SASSON_RESPONSE_TO_FORSKOLIN_DN               | 2  | 83  | 16170 | 33   | 11.86783 | 0.012278 |
| red         | 3632  | MODULE_147                                    | 8  | 96  | 16157 | 524  | 2.584765 | 0.012309 |
| grey60      | 9972  | GSE3982_EOSINOPHIL_VS_DC_UP                   | 3  | 178 | 16075 | 44   | 6.225613 | 0.012311 |
| grey60      | 9986  | GSE3982_EOSINOPHIL_VS_NKCELL_UP               | 3  | 178 | 16075 | 44   | 6.225613 | 0.012311 |
| red         | 9291  | GSE20715_0H_VS_24H_OZONE_LUNG_DN              | 12 | 177 | 16076 | 524  | 2.102859 | 0.012321 |
| red         | 9503  | GSE2706_UNSTIM_VS_2H_LPS_DC_DN                | 12 | 177 | 16076 | 524  | 2.102859 | 0.012321 |
| red         | 9990  | GSE3982_EOSINOPHIL_VS_TH2_UP                  | 12 | 177 | 16076 | 524  | 2.102859 | 0.012321 |
| turquoise   | 8259  | MEK_UP.V1_DN                                  | 58 | 173 | 16080 | 4169 | 1.307024 | 0.012337 |
| lightcyan   | 6304  | LENAOUR_DENDRITIC_CELL_MATURATION_DN          | 3  | 126 | 16127 | 62   | 6.241551 | 0.012339 |
| red         | 4588  | REACTOME_FATTY_ACID_TRIACYLGLYCEROL_AND_KETI  | 11 | 156 | 16097 | 524  | 2.187109 | 0.012348 |
| red         | 8767  | GSE15750_WT_VS_TRAF6KO_DAY6_EFF_CD8_TCELL_D   | 11 | 156 | 16097 | 524  | 2.187109 | 0.012348 |
| greenyello  | 809   | ANATOMICAL_STRUCTURE_DEVELOPMENT              | 13 | 696 | 15557 | 150  | 2.023841 | 0.01235  |
| tan         | 9194  | GSE17974_IL4_AND_ANTI_IL12_VS_UNTREATED_6H_A  | 5  | 154 | 16099 | 145  | 3.639275 | 0.012353 |
| blue        | 10003 | GSE3982_MAST_CELL_VS_EFF_MEMORY_CD4_TCELL_I   | 42 | 164 | 16089 | 2978 | 1.397701 | 0.01236  |
| magenta     | 1623  | V\$NKX25_01                                   | 4  | 87  | 16166 | 167  | 4.474637 | 0.012367 |
| magenta     | 6294  | ZHAN_MULTIPLE_MYELOMA_CD1_AND_CD2_UP          | 4  | 87  | 16166 | 167  | 4.474637 | 0.012367 |
| yellow      | 173   | MITOCHONDRIAL_RESPIRATORY_CHAIN               | 6  | 23  | 16230 | 1426 | 2.973291 | 0.012376 |
| turquoise   | 9175  | GSE17974_CTRL_VS_ACT_IL4_AND_ANTI_IL12_4H_CD4 | 65 | 197 | 16056 | 4169 | 1.286319 | 0.012379 |
| lightgreen  | 7943  | MIYAGAWA_TARGETS_OF_EWSR1_ETS_FUSIONS_DN      | 3  | 187 | 16066 | 42   | 6.208174 | 0.012382 |
| blue        | 3948  | PID_TCR_PATHWAY                               | 20 | 66  | 16187 | 2978 | 1.653845 | 0.01239  |
| black       | 5384  | CHASSOT_SKIN_WOUND                            | 2  | 10  | 16243 | 283  | 11.48622 | 0.012397 |
| cyan        | 9211  | GSE17974_0.5H_VS_72H_IL4_AND_ANTI_IL12_ACT_CD | 4  | 189 | 16064 | 77   | 4.467258 | 0.012399 |
| green       | 5307  | HAMAI_APOPTOSIS_VIA_TRAIL_DN                  | 21 | 155 | 16098 | 1305 | 1.687371 | 0.012422 |
| purple      | 2855  | KEGG_LONG_TERM_DEPRESSION                     | 3  | 50  | 16203 | 157  | 6.211338 | 0.012439 |
| purple      | 6588  | VERRECCHIA_EARLY_RESPONSE_TO_TGFB1            | 3  | 50  | 16203 | 157  | 6.211338 | 0.012439 |
| greenyello  | 6047  | CERVERA_SDHB_TARGETS_1_UP                     | 4  | 97  | 16156 | 150  | 4.468179 | 0.012451 |
| yellow      | 5232  | CONCANNON_APOPTOSIS_BY_EPOXOMICIN_DN          | 22 | 151 | 16102 | 1426 | 1.66058  | 0.012455 |
| black       | 9146  | GSE17721_4_VS_24H_GARDIQUIMOD_BMDM_UP         | 8  | 177 | 16076 | 283  | 2.595756 | 0.012469 |
| brown       | 44    | CONTRACTILE_FIBER                             | 7  | 20  | 16233 | 2190 | 2.597511 | 0.012483 |
| brown       | 3052  | BIOCARTA_NKCELLS_PATHWAY                      | 7  | 20  | 16233 | 2190 | 2.597511 | 0.012483 |
| brown       | 4058  | PID_P38_MK2PATHWAY                            | 7  | 20  | 16233 | 2190 | 2.597511 | 0.012483 |
| brown       | 6234  | HASLINGER_B_CLL_WITH_17P13_DELETION           | 7  | 20  | 16233 | 2190 | 2.597511 | 0.012483 |

|             |                                                    |     |     |       |      |          |          |
|-------------|----------------------------------------------------|-----|-----|-------|------|----------|----------|
| brown       | 7751 MOOTHA_GLYCOLYSIS                             | 7   | 20  | 16233 | 2190 | 2.597511 | 0.012483 |
| cyan        | 3218 chr6p21                                       | 5   | 292 | 15961 | 77   | 3.614348 | 0.012485 |
| green       | 413 ANATOMICAL_STRUCTURE_MORPHOGENESIS             | 33  | 274 | 15979 | 1305 | 1.499983 | 0.012497 |
| blue        | 9884 GSE360_HIGH_VS_LOW_DOSE_B_MALAYI_MAC_UP       | 45  | 178 | 16075 | 2978 | 1.379753 | 0.012497 |
| greenyello  | 2286 TTCYNRGAA_V\$STAT5B_01                        | 7   | 269 | 15984 | 150  | 2.819603 | 0.012501 |
| magenta     | 1699 V\$FOXJ2_02                                   | 6   | 186 | 16067 | 167  | 3.139463 | 0.01253  |
| turquoise   | 3183 chr4q21                                       | 25  | 64  | 16189 | 4169 | 1.522866 | 0.012539 |
| turquoise   | 4712 REACTOME_APC_C_CDH1_MEDIATED_DEGRADATION_     | 25  | 64  | 16189 | 4169 | 1.522866 | 0.012539 |
| turquoise   | 5225 VANHARANTA_UTERINE_FIBROID_WITH_7Q_DELETION   | 25  | 64  | 16189 | 4169 | 1.522866 | 0.012539 |
| lightgreen  | 9419 GSE24142_DN2_VS_DN3_THYMOCYTE_ADULT_DN        | 3   | 188 | 16065 | 42   | 6.175152 | 0.01256  |
| midnightb   | 6060 ZUCCHI_METASTASIS_DN                          | 2   | 39  | 16214 | 71   | 11.73926 | 0.012561 |
| midnightb   | 7101 EHLERS_ANEUPLOIDY_UP                          | 2   | 39  | 16214 | 71   | 11.73926 | 0.012561 |
| turquoise   | 7092 TOYOTA_TARGETS_OF_MIR34B_AND_MIR34C           | 135 | 444 | 15809 | 4169 | 1.185366 | 0.012568 |
| purple      | 6955 MARTINEZ_TP53_TARGETS_UP                      | 11  | 522 | 15731 | 157  | 2.181504 | 0.012573 |
| cyan        | 2716 GNF2_VAV1                                     | 2   | 36  | 16217 | 77   | 11.72655 | 0.012577 |
| purple      | 5198 CHEBOTAEV_GR_TARGETS_DN                       | 4   | 93  | 16160 | 157  | 4.452572 | 0.01259  |
| purple      | 6665 KEEN_RESPONSE_TO_ROSIGLITAZONE_DN             | 4   | 93  | 16160 | 157  | 4.452572 | 0.01259  |
| lightgreen  | 6535 MAHAJAN_RESPONSE_TO_IL1A_DN                   | 2   | 66  | 16187 | 42   | 11.72655 | 0.012595 |
| turquoise   | 10292 GSE9988_ANTI_TREM1_AND_LPS_VS_CTRL_TREATED_I | 60  | 180 | 16073 | 4169 | 1.299512 | 0.012601 |
| turquoise   | 10294 GSE9988_ANTI_TREM1_AND_LPS_VS_VEHICLE_TREATE | 60  | 180 | 16073 | 4169 | 1.299512 | 0.012601 |
| purple      | 1847 V\$HFH4_01                                    | 5   | 143 | 16110 | 157  | 3.619661 | 0.012621 |
| purple      | 8304 NOTCH_DN.V1_UP                                | 5   | 143 | 16110 | 157  | 3.619661 | 0.012621 |
| cyan        | 4754 REACTOME_ANTIGEN_PROCESSING_UBIQUITINATION_   | 4   | 190 | 16063 | 77   | 4.443746 | 0.012621 |
| cyan        | 10054 GSE3982_NEUTROPHIL_VS_NKCELL_UP              | 4   | 190 | 16063 | 77   | 4.443746 | 0.012621 |
| magenta     | 7145 BOQUEST_STEM_CELL_CULTURED_VS_FRESH_UP        | 9   | 362 | 15891 | 167  | 2.419641 | 0.012629 |
| brown       | 7848 KIM_BIPOLAR_DISORDER_OLIGODENDROCYTE_DENSIT   | 107 | 646 | 15607 | 2190 | 1.229251 | 0.01263  |
| salmon      | 4299 REACTOME_MICRORNA_MIRNA_BIOGENESIS            | 2   | 22  | 16231 | 127  | 11.63422 | 0.012634 |
| yellow      | 9500 GSE2706_UNSTIM_VS_8H_R848_DC_UP               | 25  | 178 | 16075 | 1426 | 1.600789 | 0.012675 |
| brown       | 9105 GSE17721_0.5H_VS_4H_POLYIC_BMDM_DN            | 37  | 190 | 16063 | 2190 | 1.445232 | 0.012677 |
| brown       | 9474 GSE26495_NAIVE_VS_PD1LOW_CD8_TCELL_UP         | 37  | 190 | 16063 | 2190 | 1.445232 | 0.012677 |
| brown       | 10019 GSE3982_DC_VS_BASOPHIL_DN                    | 37  | 190 | 16063 | 2190 | 1.445232 | 0.012677 |
| black       | 6934 HELLER_HDAC_TARGETS_UP                        | 11  | 289 | 15964 | 283  | 2.185959 | 0.012693 |
| greenyello  | 2258 CTTTGA_V\$LEF1_Q2                             | 16  | 936 | 15317 | 150  | 1.852194 | 0.012723 |
| greenyello  | 3553 MODULE_64                                     | 9   | 404 | 15849 | 150  | 2.413812 | 0.012743 |
| yellow      | 7598 KESHELAVA_MULTIPLE_DRUG_RESISTANCE            | 14  | 83  | 16170 | 1426 | 1.922489 | 0.012747 |
| green       | 3518 MODULE_26                                     | 22  | 165 | 16088 | 1305 | 1.660587 | 0.012755 |
| green       | 4489 REACTOME_G_ALPHA_I_SIGNALLING_EVENTS          | 18  | 127 | 16126 | 1305 | 1.765191 | 0.012769 |
| greenyello  | 1800 V\$MTF1_Q4                                    | 6   | 208 | 16045 | 150  | 3.125577 | 0.012772 |
| blue        | 2355 MORF_BMI1                                     | 23  | 79  | 16174 | 2978 | 1.588948 | 0.012772 |
| blue        | 4720 REACTOME_REGULATION_OF_GLUCOKINASE_BY_GLUC    | 10  | 26  | 16227 | 2978 | 2.099111 | 0.01278  |
| blue        | 6883 STEIN_ESRRA_TARGETS_RESPONSIVE_TO_ESTROGEN_U  | 10  | 26  | 16227 | 2978 | 2.099111 | 0.01278  |
| turquoise   | 5278 MISSIAGLIA_REGULATED_BY_METHYLATION_DN        | 41  | 116 | 16137 | 4169 | 1.377931 | 0.012781 |
| red         | 6630 LEE_AGING_CEREBELLUM_UP                       | 7   | 78  | 16175 | 524  | 2.783593 | 0.012799 |
| turquoise   | 1472 AACWWCAANK_UNKNOWN                            | 44  | 126 | 16127 | 4169 | 1.361394 | 0.01281  |
| pink        | 4410 REACTOME_G1_PHASE                             | 3   | 35  | 16218 | 228  | 6.11015  | 0.012814 |
| pink        | 5669 CEBALLOS_TARGETS_OF_TP53_AND_MYC_DN           | 3   | 35  | 16218 | 228  | 6.11015  | 0.012814 |
| purple      | 3548 MODULE_59                                     | 2   | 18  | 16235 | 157  | 11.50248 | 0.012818 |
| purple      | 7387 HOFMANN_MYELODYSPLASTIC_SYNDROM_HIGH_RISK_    | 2   | 18  | 16235 | 157  | 11.50248 | 0.012818 |
| pink        | 8263 PRC1_BMI_UP.V1_DN                             | 6   | 137 | 16116 | 228  | 3.121975 | 0.012818 |
| magenta     | 2117 TCATCTC,MIR-143                               | 5   | 135 | 16118 | 167  | 3.604569 | 0.012828 |
| turquoise   | 6144 SHEPARD_BMYB_MORPHOLINO_UP                    | 62  | 187 | 16066 | 4169 | 1.292563 | 0.012832 |
| turquoise   | 10081 GSE3982_BASOPHIL_VS_TH2_DN                   | 62  | 187 | 16066 | 4169 | 1.292563 | 0.012832 |
| magenta     | 1881 V\$OCT_Q6                                     | 6   | 187 | 16066 | 167  | 3.122674 | 0.012838 |
| magenta     | 1015 SYSTEM_PROCESS                                | 9   | 363 | 15890 | 167  | 2.412976 | 0.012839 |
| red         | 2020 AACTGT,MIR-144                                | 12  | 178 | 16075 | 524  | 2.091046 | 0.012839 |
| red         | 8442 GSE10856_CTRL_VS_TNFRSF6B_IN_MACROPHAGE_UP    | 12  | 178 | 16075 | 524  | 2.091046 | 0.012839 |
| red         | 8855 GSE17721_CTRL_VS_POLYIC_4H_BMDM_DN            | 12  | 178 | 16075 | 524  | 2.091046 | 0.012839 |
| red         | 9972 GSE3982_EOSINOPHIL_VS_DC_UP                   | 12  | 178 | 16075 | 524  | 2.091046 | 0.012839 |
| cyan        | 8725 GSE14769_UNSTIM_VS_240MIN_LPS_BMDM_DN         | 4   | 191 | 16062 | 77   | 4.42048  | 0.012846 |
| lightyellow | 3417 chr3q21                                       | 2   | 85  | 16168 | 33   | 11.58859 | 0.012848 |



|             |                                                    |    |      |       |      |          |          |
|-------------|----------------------------------------------------|----|------|-------|------|----------|----------|
| brown       | 9792 GSE360_CTRL_VS_L_DONOVANI_DC_UP               | 36 | 184  | 16069 | 2190 | 1.452025 | 0.01285  |
| brown       | 9957 GSE3982_CTRL_VS_LPS_48H_DC_DN                 | 36 | 184  | 16069 | 2190 | 1.452025 | 0.01285  |
| blue        | 10092 GSE3982_CENT_MEMORY_CD4_TCELL_VS_TH1_UP      | 43 | 169  | 16084 | 2978 | 1.388643 | 0.012854 |
| lightgreen  | 3395 chr6q26                                       | 1  | 5    | 16248 | 42   | 77.39524 | 0.012856 |
| lightgreen  | 7173 YAGUE_PRETUMOR_DRUG_RESISTANCE_UP             | 1  | 5    | 16248 | 42   | 77.39524 | 0.012856 |
| grey60      | 9456 GSE24634_IL4_VS_CTRL_TREATED_NAIVE_CD4_TCELL_ | 3  | 181  | 16072 | 44   | 6.122426 | 0.012875 |
| greenyello  | 2135 GTGTCAA,MIR-514                               | 3  | 53   | 16200 | 150  | 6.133208 | 0.012889 |
| greenyello  | 3140 chr4p16                                       | 4  | 98   | 16155 | 150  | 4.422585 | 0.012889 |
| magenta     | 330 T_CELL_PROLIFERATION                           | 2  | 17   | 16236 | 167  | 11.44981 | 0.012898 |
| magenta     | 1465 V\$EVI1_06                                    | 2  | 17   | 16236 | 167  | 11.44981 | 0.012898 |
| magenta     | 5287 SILIGAN_TARGETS_OF_EWS_FLI1_FUSION_DN         | 2  | 17   | 16236 | 167  | 11.44981 | 0.012898 |
| magenta     | 6251 HASLINGER_B_CLL_WITH_MUTATED_VH_GENES         | 2  | 17   | 16236 | 167  | 11.44981 | 0.012898 |
| magenta     | 6277 ZHAN_MULTIPLE_MYELOMA_SPIKED                  | 2  | 17   | 16236 | 167  | 11.44981 | 0.012898 |
| turquoise   | 3775 MODULE_323                                    | 24 | 61   | 16192 | 4169 | 1.533851 | 0.012939 |
| salmon      | 8611 GSE14000_TRANSLATED_RNA_VS_MRNA_4H_LPS_DC_    | 5  | 178  | 16075 | 127  | 3.594842 | 0.012959 |
| salmon      | 8879 GSE17721_CTRL_VS_PAM3CSK4_24H_BMDM_DN         | 5  | 178  | 16075 | 127  | 3.594842 | 0.012959 |
| salmon      | 9036 GSE17721_PAM3CSK4_VS_GADIQUIMOD_24H_BMDM      | 5  | 178  | 16075 | 127  | 3.594842 | 0.012959 |
| salmon      | 9817 GSE360_DC_VS_MAC_DN                           | 5  | 178  | 16075 | 127  | 3.594842 | 0.012959 |
| lightgreen  | 3911 MODULE_544                                    | 2  | 67   | 16186 | 42   | 11.55153 | 0.012962 |
| grey60      | 3564 MODULE_76                                     | 2  | 64   | 16189 | 44   | 11.54332 | 0.012983 |
| grey60      | 6844 LEIN_OLIGODENDROCYTE_MARKERS                  | 2  | 64   | 16189 | 44   | 11.54332 | 0.012983 |
| salmon      | 2304 MORF_DNMT1                                    | 4  | 116  | 16137 | 127  | 4.412979 | 0.013001 |
| brown       | 8873 GSE17721_CTRL_VS_PAM3CSK4_6H_BMDM_DN          | 35 | 178  | 16075 | 2190 | 1.459276 | 0.013012 |
| brown       | 9036 GSE17721_PAM3CSK4_VS_GADIQUIMOD_24H_BMDM      | 35 | 178  | 16075 | 2190 | 1.459276 | 0.013012 |
| brown       | 9972 GSE3982_EOSINOPHIL_VS_DC_UP                   | 35 | 178  | 16075 | 2190 | 1.459276 | 0.013012 |
| green       | 7461 CROONQUIST_STROMAL_STIMULATION_UP             | 9  | 48   | 16205 | 1305 | 2.335201 | 0.013024 |
| turquoise   | 1235 PROTEIN_SERINE_THREONINE_KINASE_ACTIVITY      | 64 | 194  | 16059 | 4169 | 1.286115 | 0.013035 |
| turquoise   | 9207 GSE17974_1H_VS_72H_UNTREATED_IN_VITRO_CD4_T   | 64 | 194  | 16059 | 4169 | 1.286115 | 0.013035 |
| turquoise   | 9929 GSE37416_CTRL_VS_12H_F_TULARENSIS_LVS_NEUTRO  | 64 | 194  | 16059 | 4169 | 1.286115 | 0.013035 |
| turquoise   | 9966 GSE3982_DC_VS_NEUTROPHIL_LPS_STIM_UP          | 64 | 194  | 16059 | 4169 | 1.286115 | 0.013035 |
| purple      | 2896 KEGG_SYSTEMIC_LUPUS_ERYTHEMATOSUS             | 4  | 94   | 16159 | 157  | 4.405204 | 0.013053 |
| purple      | 8333 PDGF_UP.V1_DN                                 | 4  | 94   | 16159 | 157  | 4.405204 | 0.013053 |
| greenyello  | 3456 SA_CASPASE_CASCADE                            | 2  | 19   | 16234 | 150  | 11.40561 | 0.013054 |
| greenyello  | 5421 BREUHahn_GROWTH_FACTOR_SIGNALING_IN_LIVER_I   | 2  | 19   | 16234 | 150  | 11.40561 | 0.013054 |
| greenyello  | 1774 V\$RP58_01                                    | 5  | 151  | 16102 | 150  | 3.587859 | 0.013073 |
| cyan        | 8821 GSE16522_ANTI_CD3CD28_STIM_VS_UNSTIM_NAIVE_I  | 4  | 192  | 16061 | 77   | 4.397457 | 0.013073 |
| blue        | 6064 ASTON_MAJOR_DEPRESSIVE_DISORDER_DN            | 36 | 137  | 16116 | 2978 | 1.434137 | 0.013076 |
| grey60      | 5908 BENPORATH_PRC2_TARGETS                        | 4  | 339  | 15914 | 44   | 4.358541 | 0.013099 |
| pink        | 3627 MODULE_139                                    | 4  | 65   | 16188 | 228  | 4.386775 | 0.013104 |
| pink        | 4427 REACTOME_METABOLISM_OF_NUCLEOTIDES            | 4  | 65   | 16188 | 228  | 4.386775 | 0.013104 |
| lightgreen  | 8719 GSE14769_UNSTIM_VS_60MIN_LPS_BMDM_DN          | 3  | 191  | 16062 | 42   | 6.07816  | 0.013104 |
| lightgreen  | 8831 GSE17580_UNINFECTED_VS_S_MANSONI_INF_TREG_D   | 3  | 191  | 16062 | 42   | 6.07816  | 0.013104 |
| lightgreen  | 9721 GSE30083_SP3_VS_SP4_THYMOCYTE_DN              | 3  | 191  | 16062 | 42   | 6.07816  | 0.013104 |
| lightgreen  | 10172 GSE7460_FOXP3_MUT_VS_WT_ACT_TCONV_UP         | 3  | 191  | 16062 | 42   | 6.07816  | 0.013104 |
| lightgreen  | 10207 GSE7852_LN_VS_FAT_TCONV_DN                   | 3  | 191  | 16062 | 42   | 6.07816  | 0.013104 |
| purple      | 5185 CHIARADONNA_NEOPLASTIC_TRANSFORMATION_KRAS    | 3  | 51   | 16202 | 157  | 6.089547 | 0.013124 |
| purple      | 5943 AMIT_SERUM_RESPONSE_240_MCF10A                | 3  | 51   | 16202 | 157  | 6.089547 | 0.013124 |
| purple      | 6494 RAMASWAMY_METASTASIS_DN                       | 3  | 51   | 16202 | 157  | 6.089547 | 0.013124 |
| lightyellow | 5120 GRAHAM_CML_QUIESCENT_VS_NORMAL_QUIESCENT_     | 2  | 86   | 16167 | 33   | 11.45384 | 0.013137 |
| lightyellow | 8371 KRAS.BREAST_UP.V1_UP                          | 2  | 86   | 16167 | 33   | 11.45384 | 0.013137 |
| magenta     | 6253 ZHAN_MULTIPLE_MYELOMA_CD1_AND_CD2_DN          | 3  | 48   | 16205 | 167  | 6.08271  | 0.01314  |
| brown       | 5302 DUNNE_TARGETS_OF_AML1_MTG8_FUSION_UP          | 13 | 50   | 16203 | 2190 | 1.92958  | 0.013144 |
| lightcyan   | 5393 PEREZ_TP53_TARGETS                            | 9  | 1001 | 15252 | 62   | 2.35695  | 0.013147 |
| magenta     | 10180 GSE7460_WT_VS_FOXP3_HET_ACT_WITH_TGFB_TCON   | 6  | 188  | 16065 | 167  | 3.106064 | 0.013152 |
| salmon      | 4599 REACTOME_ASSEMBLY_OF_THE_PRE_REPLICATIVE_CO   | 3  | 63   | 16190 | 127  | 6.094113 | 0.01316  |
| red         | 6310 ZHAN_MULTIPLE_MYELOMA_CD2_UP                  | 5  | 44   | 16209 | 524  | 3.524679 | 0.013174 |
| red         | 7134 CHUNG_BLISTER_CYTOTOXICITY_DN                 | 5  | 44   | 16209 | 524  | 3.524679 | 0.013174 |
| red         | 7960 CHANGOLKAR_H2AFY_TARGETS_UP                   | 5  | 44   | 16209 | 524  | 3.524679 | 0.013174 |
| turquoise   | 1009 CHROMATIN_ASSEMBLY_OR_DISASSEMBLY             | 12 | 25   | 16228 | 4169 | 1.871298 | 0.01318  |
| midnightb   | 5382 RIZ_ERYTHROID_DIFFERENTIATION_CCNE1           | 2  | 40   | 16213 | 71   | 11.44577 | 0.013186 |

|              |                                                               |     |      |       |      |          |          |
|--------------|---------------------------------------------------------------|-----|------|-------|------|----------|----------|
| midnightblue | 6105 FLECHNER_PBL_KIDNEY_TRANSPLANT_OK_VS_DONOR_2515 GCM_DFFA | 2   | 40   | 16213 | 71   | 11.44577 | 0.013186 |
| lightcyan    | 5507 SCHLOSSER_SERUM_RESPONSE_DN                              | 7   | 667  | 15586 | 62   | 2.751149 | 0.013207 |
| brown        | 1002 INTRACELLULAR_SIGNALING_CASCADE                          | 97  | 580  | 15673 | 2190 | 1.241175 | 0.013212 |
| turquoise    | 7896 PANGAS_TUMOR_SUPPRESSION_BY_SMAD1_AND_SMAD4              | 49  | 143  | 16110 | 4169 | 1.335862 | 0.013223 |
| lightyellow  | 356 CELL_SURFACE_RECEPTOR_LINKED_SIGNAL_TRANSDUC              | 4   | 457  | 15796 | 33   | 4.310855 | 0.013244 |
| cyan         | 3559 MODULE_70                                                | 2   | 37   | 16216 | 77   | 11.40962 | 0.013255 |
| lightcyan    | 7266 BOYLAN_MULTIPLE_MYELOMA_C_D_DN                           | 4   | 240  | 16013 | 62   | 4.369086 | 0.013256 |
| grey60       | 5045 TONKS_TARGETS_OF_RUNX1_RUNX1T1_FUSION_HSC                | 3   | 183  | 16070 | 44   | 6.055514 | 0.013259 |
| purple       | 4988 OSWALD_HEMATOPOIETIC_STEM_CELL_IN_COLLAGEN               | 7   | 260  | 15993 | 157  | 2.787139 | 0.013268 |
| turquoise    | 9387 GSE22886_IL2_VS_IL15_STIM_NKCELL_DN                      | 59  | 177  | 16076 | 4169 | 1.299512 | 0.013271 |
| yellow       | 4695 REACTOME_INFLUENZA_VIRAL_RNA_TRANSCRIPTION               | 16  | 100  | 16153 | 1426 | 1.823619 | 0.013278 |
| turquoise    | 384 MICROTUBULE_BASED_PROCESS                                 | 29  | 77   | 16176 | 4169 | 1.46828  | 0.013279 |
| lightgreen   | 9791 GSE34205_RSV_VS_FLU_INF_INFANT_PBMC_DN                   | 3   | 192  | 16061 | 42   | 6.046503 | 0.013289 |
| green        | 4167 REACTOME_MEIOSIS                                         | 13  | 82   | 16171 | 1305 | 1.974479 | 0.013296 |
| cyan         | 9339 GSE22886_IGG_IGA_MEMORY_BCELL_VS_BLOOD_PLASMA            | 4   | 193  | 16060 | 77   | 4.374672 | 0.013303 |
| cyan         | 9447 GSE24634_TREG_VS_TCONV_POST_DAY10_IL4_CONV               | 4   | 193  | 16060 | 77   | 4.374672 | 0.013303 |
| cyan         | 9789 GSE34205_HEALTHY_VS_FLU_INF_INFANT_PBMC_DN               | 4   | 193  | 16060 | 77   | 4.374672 | 0.013303 |
| lightcyan    | 8083 PLASARI_TGFB1_SIGNALING_VIA_NFIC_10HR_UP                 | 2   | 46   | 16207 | 62   | 11.39762 | 0.013304 |
| blue         | 3348 chr7q36                                                  | 18  | 58   | 16195 | 2978 | 1.693766 | 0.013309 |
| blue         | 4762 REACTOME_TELOMERE_MAINTENANCE                            | 18  | 58   | 16195 | 2978 | 1.693766 | 0.013309 |
| red          | 4656 REACTOME_INTERFERON_SIGNALING                            | 10  | 137  | 16116 | 524  | 2.264027 | 0.013309 |
| red          | 5206 LINDGREN_BLADDER_CANCER_CLUSTER_2A_DN                    | 10  | 137  | 16116 | 524  | 2.264027 | 0.013309 |
| turquoise    | 6789 BILD_SRC_ONCOGENIC_SIGNATURE                             | 23  | 58   | 16195 | 4169 | 1.545971 | 0.013325 |
| yellow       | 5238 GRAESSMANN_APOPTOSIS_BY_DOXORUBICIN_DN                   | 175 | 1705 | 14548 | 1426 | 1.169843 | 0.013327 |
| brown        | 300 ESTABLISHMENT_OF_LOCALIZATION                             | 120 | 735  | 15518 | 2190 | 1.211667 | 0.013328 |
| lightgreen   | 3689 MODULE_209                                               | 2   | 68   | 16185 | 42   | 11.38165 | 0.013333 |
| lightgreen   | 3877 MODULE_481                                               | 2   | 68   | 16185 | 42   | 11.38165 | 0.013333 |
| lightgreen   | 6621 GEORGANTAS_HSC_MARKERS                                   | 2   | 68   | 16185 | 42   | 11.38165 | 0.013333 |
| purple       | 8762 GSE15659_NONSUPPRESSIVE_TCELL_VS_ACTIVATED_TCELL         | 5   | 145  | 16108 | 157  | 3.569734 | 0.013337 |
| pink         | 7501 POOLA_INVASIVE_BREAST_CANCER_DN                          | 5   | 100  | 16153 | 228  | 3.564254 | 0.013338 |
| blue         | 6163 TARTE_PLASMA_CELL_VS_PLASMA_BLAST_DN                     | 72  | 307  | 15946 | 2978 | 1.279979 | 0.013346 |
| turquoise    | 2091 GCAAAAA,MIR-129                                          | 54  | 160  | 16093 | 4169 | 1.315756 | 0.013352 |
| blue         | 9432 GSE24634_NAIVE_CD4_TCELL_VS_DAY3_IL4_CONV_TR             | 47  | 188  | 16065 | 2978 | 1.364422 | 0.013363 |
| brown        | 3527 MODULE_38                                                | 69  | 395  | 15858 | 2190 | 1.296407 | 0.013368 |
| red          | 8685 GSE1460_INTRATHYMIC_T_PROGENITOR_VS_DP_THYM              | 12  | 179  | 16074 | 524  | 2.079364 | 0.013375 |
| red          | 8731 GSE14769_40MIN_VS_360MIN_LPS_BMDM_DN                     | 12  | 179  | 16074 | 524  | 2.079364 | 0.013375 |
| red          | 9629 GSE2826_XID_VS_BTK_KO_BCELL_DN                           | 12  | 179  | 16074 | 524  | 2.079364 | 0.013375 |
| lightgreen   | 5393 PEREZ_TP53_TARGETS                                       | 7   | 1001 | 15252 | 42   | 2.706127 | 0.01338  |
| salmon       | 6693 DAZARD_RESPONSE_TO_UV_SCC_UP                             | 4   | 117  | 16136 | 127  | 4.375261 | 0.013382 |
| blue         | 3438 chr14q24                                                 | 25  | 88   | 16165 | 2978 | 1.55048  | 0.013386 |
| brown        | 1223 KINASE_ACTIVITY                                          | 61  | 343  | 15910 | 2190 | 1.319852 | 0.013394 |
| yellow       | 2425 MORF_NME2                                                | 22  | 152  | 16101 | 1426 | 1.649655 | 0.013395 |
| red          | 5440 RASHI_RESPONSE_TO_IONIZING_RADIATION_2                   | 9   | 117  | 16136 | 524  | 2.385937 | 0.013413 |
| red          | 356 CELL_SURFACE_RECEPTOR_LINKED_SIGNAL_TRANSDUC              | 24  | 457  | 15796 | 524  | 1.628911 | 0.013426 |
| turquoise    | 421 NEGATIVE_REGULATION_OF_TRANSCRIPTION_DNA_DE               | 40  | 113  | 16140 | 4169 | 1.380013 | 0.01343  |
| turquoise    | 1494 AAGWWRNYGGC_UNKNOWN                                      | 40  | 113  | 16140 | 4169 | 1.380013 | 0.01343  |
| turquoise    | 224 ENDOPLASMIC_RETICULUM_PART                                | 33  | 90   | 16163 | 4169 | 1.429464 | 0.013446 |
| turquoise    | 4519 REACTOME_SYNTHESIS_OF_DNA                                | 33  | 90   | 16163 | 4169 | 1.429464 | 0.013446 |
| cyan         | 821 TRANSCRIPTION                                             | 8   | 667  | 15586 | 77   | 2.531669 | 0.01346  |
| blue         | 2724 KEGG_ASCORBATE_AND_ALDARATE_METABOLISM                   | 5   | 9    | 16244 | 2978 | 3.03205  | 0.013464 |
| blue         | 5829 CAFFAREL_RESPONSE_TO_THC_8HR_3_DN                        | 5   | 9    | 16244 | 2978 | 3.03205  | 0.013464 |
| grey60       | 3895 MODULE_514                                               | 1   | 5    | 16248 | 44   | 73.87727 | 0.013465 |
| grey60       | 5321 ZIRN_TRETINOIN_RESPONSE_DN                               | 1   | 5    | 16248 | 44   | 73.87727 | 0.013465 |
| magenta      | 9278 GSE20366_TREG_VS_NAIVE_CD4_TCELL_UP                      | 6   | 189  | 16064 | 167  | 3.08963  | 0.013471 |
| lightgreen   | 1479 V\$E4BP4_01                                              | 3   | 193  | 16060 | 42   | 6.015174 | 0.013475 |
| lightgreen   | 6329 AFFAR_YY1_TARGETS_DN                                     | 3   | 193  | 16060 | 42   | 6.015174 | 0.013475 |
| lightgreen   | 10108 GSE39820_CTRL_VS_TGFBETA3_IL6_CD4_TCELL_UP              | 3   | 193  | 16060 | 42   | 6.015174 | 0.013475 |
| yellow       | 7815 BROWNE_HCMV_INFECTION_1HR_DN                             | 26  | 188  | 16065 | 1426 | 1.576266 | 0.0135   |
| green        | 4565 REACTOME_GPCR_LIGAND_BINDING                             | 29  | 235  | 16018 | 1305 | 1.536927 | 0.013501 |

|             |                                                    |    |      |       |      |          |          |
|-------------|----------------------------------------------------|----|------|-------|------|----------|----------|
| turquoise   | 9527 GSE2706_2H_VS_8H_R848_AND_LPS_STIM_DC_DN      | 61 | 184  | 16069 | 4169 | 1.29245  | 0.013514 |
| turquoise   | 9578 GSE27786_CD4_TCELL_VS_NKCELL_UP               | 61 | 184  | 16069 | 4169 | 1.29245  | 0.013514 |
| turquoise   | 9626 GSE2826_WT_VS_BTK_KO_BCELL_UP                 | 61 | 184  | 16069 | 4169 | 1.29245  | 0.013514 |
| turquoise   | 9689 GSE29618_PRE_VS_DAY7_POST_TIV_FLU_VACCINE_BC  | 61 | 184  | 16069 | 4169 | 1.29245  | 0.013514 |
| tan         | 6595 PAL_PRMT5_TARGETS_DN                          | 2  | 20   | 16233 | 145  | 11.20897 | 0.013518 |
| lightyellow | 8006 TORCHIA_TARGETS_OF_EWSR1_FLI1_FUSION_UP       | 3  | 247  | 16006 | 33   | 5.981965 | 0.01352  |
| green       | 1751 V\$BACH2_01                                   | 28 | 225  | 16028 | 1305 | 1.549882 | 0.013523 |
| purple      | 5326 KAN_RESPONSE_TO_ARSENIC_TRIOXIDE              | 4  | 95   | 16158 | 157  | 4.358833 | 0.013527 |
| grey60      | 5140 DODD_NASOPHARYNGEAL_CARCINOMA_UP              | 9  | 1439 | 14814 | 44   | 2.310269 | 0.01353  |
| red         | 6451 LIAN_LIPA_TARGETS_6M                          | 6  | 61   | 16192 | 524  | 3.05087  | 0.013542 |
| salmon      | 8964 GSE17721_PAM3CSK4_VS_CPG_24H_BMDM_UP          | 5  | 180  | 16073 | 127  | 3.554899 | 0.013545 |
| yellow      | 9628 GSE2826_XID_VS_BTK_KO_BCELL_UP                | 24 | 170  | 16083 | 1426 | 1.609075 | 0.013547 |
| brown       | 2285 CCAWWNAAGG_V\$SRF_Q4                          | 17 | 72   | 16181 | 2190 | 1.752289 | 0.013556 |
| magenta     | 4745 REACTOME_ADAPTIVE_IMMUNE_SYSTEM               | 11 | 496  | 15757 | 167  | 2.158381 | 0.013585 |
| purple      | 5862 SCHAEFFER_PROSTATE_DEVELOPMENT_48HR_UP        | 9  | 390  | 15863 | 157  | 2.388976 | 0.013588 |
| red         | 5038 MULLIGHAN_MLL_SIGNATURE_2_UP                  | 22 | 409  | 15844 | 524  | 1.668406 | 0.0136   |
| brown       | 8201 GCNP_SHH_UP_EARLY.V1_DN                       | 29 | 142  | 16111 | 2190 | 1.515651 | 0.013613 |
| brown       | 988 NEGATIVE_REGULATION_OF_PROGRAMMED_CELL_DE/     | 28 | 136  | 16117 | 2190 | 1.527948 | 0.013626 |
| brown       | 7096 ZHANG_BREAST_CANCER_PROGENITORS_DN            | 28 | 136  | 16117 | 2190 | 1.527948 | 0.013626 |
| brown       | 3934 PID_LYSOPHOSPHOLIPID_PATHWAY                  | 15 | 61   | 16192 | 2190 | 1.824949 | 0.013643 |
| red         | 2651 GNF2_IGF1                                     | 3  | 16   | 16237 | 524  | 5.81572  | 0.013643 |
| red         | 3840 MODULE_416                                    | 3  | 16   | 16237 | 524  | 5.81572  | 0.013643 |
| red         | 7949 STEGER_ADIPOGENESIS_UP                        | 3  | 16   | 16237 | 524  | 5.81572  | 0.013643 |
| blue        | 2770 KEGG_PROPANOATE_METABOLISM                    | 11 | 30   | 16223 | 2978 | 2.001153 | 0.013651 |
| blue        | 4774 REACTOME_DNA_STRAND_ELONGATION                | 11 | 30   | 16223 | 2978 | 2.001153 | 0.013651 |
| blue        | 5825 CAFFAREL_RESPONSE_TO_THC_DN                   | 11 | 30   | 16223 | 2978 | 2.001153 | 0.013651 |
| tan         | 5833 CAFFAREL_RESPONSE_TO_THC_24HR_5_DN            | 3  | 56   | 16197 | 145  | 6.004803 | 0.013658 |
| blue        | 5208 LINDGREN_BLADDER_CANCER_CLUSTER_3_DN          | 51 | 207  | 16046 | 2978 | 1.344648 | 0.013659 |
| lightgreen  | 2806 KEGG_CYTOKINE_CYTOKINE_RECEPTOR_INTERACTION   | 3  | 194  | 16059 | 42   | 5.984168 | 0.013662 |
| lightgreen  | 10199 GSE7852_LN_VS_THYMUS_TREG_DN                 | 3  | 194  | 16059 | 42   | 5.984168 | 0.013662 |
| pink        | 5126 GRAHAM_CML_DIVIDING_VS_NORMAL QUIESCENT_U     | 7  | 180  | 16073 | 228  | 2.772198 | 0.013662 |
| cyan        | 7418 CHEN_METABOLIC_SYNDROM_NETWORK                | 11 | 1094 | 15159 | 77   | 2.122356 | 0.013671 |
| black       | 9172 GSE17974_CTRL_VS_ACT_IL4_AND_ANTI_IL12_2H_CD4 | 8  | 180  | 16073 | 283  | 2.552493 | 0.013686 |
| turquoise   | 2464 MORF_REV3L                                    | 22 | 55   | 16198 | 4169 | 1.559415 | 0.013691 |
| purple      | 1544 V\$FOXD3_01                                   | 5  | 146  | 16107 | 157  | 3.545284 | 0.013706 |
| brown       | 7033 ACEVEDO_NORMAL_TISSUE_ADJACENT_TO_LIVER_TUM   | 58 | 324  | 15929 | 2190 | 1.328533 | 0.013706 |
| turquoise   | 8342 HOXA9_DN.V1_UP                                | 63 | 191  | 16062 | 4169 | 1.285905 | 0.013726 |
| turquoise   | 9580 GSE27786_CD4_TCELL_VS_NKTCELL_UP              | 63 | 191  | 16062 | 4169 | 1.285905 | 0.013726 |
| salmon      | 4712 REACTOME_APC_C_CDH1_MEDIATED_DEGRADATION_     | 3  | 64   | 16189 | 127  | 5.998893 | 0.01373  |
| salmon      | 6826 PELLICCIOTTA_HDAC_IN_ANTIGEN_PRESENTATION_UP  | 3  | 64   | 16189 | 127  | 5.998893 | 0.01373  |
| green       | 6228 GOLDRATH_IMMUNE_MEMORY                        | 11 | 65   | 16188 | 1305 | 2.107669 | 0.013738 |
| brown       | 9994 GSE3982_MAST_CELL_VS_MAC_UP                   | 37 | 191  | 16062 | 2190 | 1.437665 | 0.01374  |
| purple      | 8078 PLASARI_TGFB1_TARGETS_10HR_DN                 | 6  | 202  | 16051 | 157  | 3.07492  | 0.013758 |
| turquoise   | 6218 PENG_RAPAMYCIN_RESPONSE_DN                    | 78 | 243  | 16010 | 4169 | 1.251382 | 0.013766 |
| grey60      | 6535 MAHAJAN_RESPONSE_TO_IL1A_DN                   | 2  | 66   | 16187 | 44   | 11.19353 | 0.013767 |
| salmon      | 2800 KEGG_MISMATCH_REPAIR                          | 2  | 23   | 16230 | 127  | 11.12838 | 0.013767 |
| salmon      | 5435 CAVARD_LIVER_CANCER_MALIGNANT_VS_BENIGN       | 2  | 23   | 16230 | 127  | 11.12838 | 0.013767 |
| cyan        | 9205 GSE17974_0.5H_VS_72H_UNTREATED_IN_VITRO_CD4_  | 4  | 195  | 16058 | 77   | 4.329804 | 0.01377  |
| greenyello  | 6855 GAVIN_FOXP3_TARGETS_CLUSTER_P3                | 5  | 153  | 16100 | 150  | 3.540959 | 0.013773 |
| blue        | 4697 REACTOME_HIV_INFECTION                        | 48 | 193  | 16060 | 2978 | 1.357353 | 0.013778 |
| blue        | 8397 KAECH_DAY15_EFF_VS_MEMORY_CD8_TCELL_DN        | 48 | 193  | 16060 | 2978 | 1.357353 | 0.013778 |
| magenta     | 8492 GSE12366_GC_BCELL_VS_PLASMA_CELL_UP           | 6  | 190  | 16063 | 167  | 3.073369 | 0.013795 |
| magenta     | 8494 GSE12366_GC_VS_NAIVE_BCELL_UP                 | 6  | 190  | 16063 | 167  | 3.073369 | 0.013795 |
| magenta     | 9481 GSE26669_CTRL_VS_COSTIM_BLOCK_MLR_CD8_TCELL_  | 6  | 190  | 16063 | 167  | 3.073369 | 0.013795 |
| purple      | 6890 FOSTER_TOLERANT_MACROPHAGE_DN                 | 9  | 391  | 15862 | 157  | 2.382866 | 0.013797 |
| pink        | 4207 REACTOME_ASSOCIATION_OF_LICENSING_FACTORS_M   | 2  | 13   | 16240 | 228  | 10.96694 | 0.013803 |
| pink        | 4555 REACTOME_REGULATION_OF_AMPK_ACTIVITY_VIA_LK   | 2  | 13   | 16240 | 228  | 10.96694 | 0.013803 |
| pink        | 7768 MURAKAMI_UV_RESPONSE_1HR_UP                   | 2  | 13   | 16240 | 228  | 10.96694 | 0.013803 |
| blue        | 8510 GSE12845_IGD_POS_BLOOD_VS_DARKZONE_GC_TONS    | 45 | 179  | 16074 | 2978 | 1.372045 | 0.013805 |
| red         | 2010 ACTGCAG,MIR-17-3P                             | 8  | 98   | 16155 | 524  | 2.532014 | 0.013822 |

|            |       |                                                |     |     |       |      |          |          |
|------------|-------|------------------------------------------------|-----|-----|-------|------|----------|----------|
| midnightb  | 1053  | REGULATION_OF_CELL_GROWTH                      | 2   | 41  | 16212 | 71   | 11.16661 | 0.013823 |
| midnightb  | 2643  | GNF2_FOS                                       | 2   | 41  | 16212 | 71   | 11.16661 | 0.013823 |
| turquoise  | 2076  | AAGCACA,MIR-218                                | 103 | 331 | 15922 | 4169 | 1.21314  | 0.013824 |
| turquoise  | 294   | GLYCOPROTEIN_METABOLIC_PROCESS                 | 28  | 74  | 16179 | 4169 | 1.475122 | 0.013827 |
| purple     | 892   | FATTY_ACID_METABOLIC_PROCESS                   | 3   | 52  | 16201 | 157  | 5.97244  | 0.013831 |
| purple     | 5313  | MCBRYAN_PUBERTAL_TGFB1_TARGETS_DN              | 3   | 52  | 16201 | 157  | 5.97244  | 0.013831 |
| pink       | 4268  | REACTOME_TRANSCRIPTIONAL_ACTIVITY_OF_SMAD2_    | 3   | 36  | 16217 | 228  | 5.940424 | 0.013837 |
| pink       | 7155  | NAKAMURA_METASTASIS_MODEL_DN                   | 3   | 36  | 16217 | 228  | 5.940424 | 0.013837 |
| salmon     | 9889  | GSE360_LOW_DOSE_B_MALAYI_VS_M_TUBERCULOSIS     | 5   | 181 | 16072 | 127  | 3.535259 | 0.013845 |
| brown      | 648   | NEGATIVE_REGULATION_OF_CELLULAR_COMPONENT_     | 8   | 25  | 16228 | 2190 | 2.374868 | 0.013845 |
| brown      | 4046  | PID_IL3_PATHWAY                                | 8   | 25  | 16228 | 2190 | 2.374868 | 0.013845 |
| grey60     | 3500  | MODULE_7                                       | 3   | 186 | 16067 | 44   | 5.957845 | 0.013848 |
| grey60     | 9714  | GSE30083_SP1_VS_SP4_THYMOCYTE_UP               | 3   | 186 | 16067 | 44   | 5.957845 | 0.013848 |
| grey60     | 9976  | GSE3982_EOSINOPHIL_VS_NEUTROPHIL_UP            | 3   | 186 | 16067 | 44   | 5.957845 | 0.013848 |
| lightgreen | 8430  | GSE10325_LUPUS_CD4_TCELL_VS_LUPUS_MYELOID_U    | 3   | 195 | 16058 | 42   | 5.95348  | 0.013851 |
| lightgreen | 9372  | GSE22886_NAIVE_CD8_TCELL_VS_DC_UP              | 3   | 195 | 16058 | 42   | 5.95348  | 0.013851 |
| lightcyan  | 2647  | GNF2_HLA-C                                     | 2   | 47  | 16206 | 62   | 11.15511 | 0.013862 |
| lightcyan  | 6667  | LIU_SMARCA4_TARGETS                            | 2   | 47  | 16206 | 62   | 11.15511 | 0.013862 |
| pink       | 4971  | VECCHI_GASTRIC_CANCER_ADVANCED_VS_EARLY_DN     | 5   | 101 | 16152 | 228  | 3.528965 | 0.013877 |
| magenta    | 6221  | LEE_LIVER_CANCER_DENA_UP                       | 3   | 49  | 16204 | 167  | 5.958573 | 0.013893 |
| turquoise  | 9159  | GSE17974_0H_VS_6H_IN_VITRO_ACT_CD4_TCELL_DN    | 65  | 198 | 16055 | 4169 | 1.279823 | 0.013908 |
| lightgreen | 7145  | BOQUEST_STEM_CELL_CULTURED_VS_FRESH_UP         | 4   | 362 | 15891 | 42   | 4.27598  | 0.013917 |
| blue       | 1133  | RNA_SPLICING_FACTOR_ACTIVITYTRANSESTERIFICATIO | 8   | 19  | 16234 | 2978 | 2.297975 | 0.013926 |
| blue       | 5476  | MYLLYKANGAS_AMPLIFICATION_HOT_SPOT_23          | 8   | 19  | 16234 | 2978 | 2.297975 | 0.013926 |
| red        | 8780  | GSE15930_NAIVE_VS_24H_IN_VITRO_STIM_INFAB_CD   | 12  | 180 | 16073 | 524  | 2.067812 | 0.013927 |
| turquoise  | 3565  | MODULE_77                                      | 13  | 28  | 16225 | 4169 | 1.810035 | 0.013928 |
| turquoise  | 4600  | REACTOME_BIOSYNTHESIS_OF_THE_N_GLYCAN_PRECU    | 13  | 28  | 16225 | 4169 | 1.810035 | 0.013928 |
| magenta    | 5877  | KOYAMA_SEMA3B_TARGETS_DN                       | 9   | 368 | 15885 | 167  | 2.380191 | 0.013929 |
| brown      | 9184  | GSE17974_CTRL_VS_ACT_IL4_AND_ANTI_IL12_72H_CC  | 36  | 185 | 16068 | 2190 | 1.444176 | 0.013945 |
| brown      | 9485  | GSE26669_CD4_VS_CD8_TCELL_IN_MLR_COSTIM_BLOI   | 36  | 185 | 16068 | 2190 | 1.444176 | 0.013945 |
| brown      | 9881  | GSE360_T_GONDII_VS_B_MALAYI_LOW_DOSE_MAC_C     | 36  | 185 | 16068 | 2190 | 1.444176 | 0.013945 |
| brown      | 10010 | GSE3982_MAST_CELL_VS_TH2_UP                    | 36  | 185 | 16068 | 2190 | 1.444176 | 0.013945 |
| brown      | 10246 | GSE9037_CTRL_VS_LPS_4H_STIM_IRAK4_KO_BMDM_U    | 36  | 185 | 16068 | 2190 | 1.444176 | 0.013945 |
| cyan       | 2927  | BIOCARTA_BIOPEPTIDES_PATHWAY                   | 2   | 38  | 16215 | 77   | 11.10936 | 0.013949 |
| cyan       | 6755  | LEE_AGING_MUSCLE_UP                            | 2   | 38  | 16215 | 77   | 11.10936 | 0.013949 |
| red        | 6158  | BROCKE_APOPTOSIS_REVERSED_BY_IL6               | 10  | 138 | 16115 | 524  | 2.247621 | 0.01395  |
| turquoise  | 5133  | WAMUNYOKOLI_OVARIAN_CANCER_LMP_DN              | 58  | 174 | 16079 | 4169 | 1.299512 | 0.013978 |
| lightgreen | 4890  | FULCHER_INFLAMMATORY_RESPONSE_LLECTIN_VS_LPS   | 5   | 558 | 15695 | 42   | 3.467529 | 0.01398  |
| pink       | 7331  | YOSHIMURA_MAPK8_TARGETS_UP                     | 22  | 947 | 15306 | 228  | 1.656042 | 0.014    |
| brown      | 724   | BIOPOLYMER_MODIFICATION                        | 98  | 588 | 15665 | 2190 | 1.23691  | 0.014007 |
| cyan       | 1723  | V\$STAT5B_01                                   | 4   | 196 | 16057 | 77   | 4.307713 | 0.014008 |
| cyan       | 9252  | GSE19825_CD24LOW_VS_IL2RA_HIGH_DAY3_EFF_CD8    | 4   | 196 | 16057 | 77   | 4.307713 | 0.014008 |
| brown      | 2367  | MORF_CNTN1                                     | 21  | 95  | 16158 | 2190 | 1.640534 | 0.014014 |
| lightcyan  | 5144  | RODRIGUES_THYROID_CARCINOMA_ANAPLASTIC_UP      | 7   | 675 | 15578 | 62   | 2.718542 | 0.014026 |
| turquoise  | 1386  | SMALL_PROTEIN_CONJUGATING_ENZYME_ACTIVITY      | 21  | 52  | 16201 | 4169 | 1.574409 | 0.014028 |
| lightgreen | 8419  | GSE10239_NAIVE_VS_DAY4.5_EFF_CD8_TCELL_DN      | 3   | 196 | 16057 | 42   | 5.923105 | 0.014041 |
| lightgreen | 9902  | GSE36476_CTRL_VS_TSST_ACT_16H_MEMORY_CD4_T     | 3   | 196 | 16057 | 42   | 5.923105 | 0.014041 |
| lightgreen | 10156 | GSE7460_CTRL_VS_TGFB_TREATED_ACT_TREG_UP       | 3   | 196 | 16057 | 42   | 5.923105 | 0.014041 |
| lightgreen | 10262 | GSE9650_EFFECTOR_VS_MEMORY_CD8_TCELL_UP        | 3   | 196 | 16057 | 42   | 5.923105 | 0.014041 |
| tan        | 4909  | CASORELLI_ACUTE_PROMYELOCYTIC_LEUKEMIA_DN      | 12  | 653 | 15600 | 145  | 2.059841 | 0.014042 |
| blue       | 138   | SPLICEOSOME                                    | 16  | 50  | 16203 | 2978 | 1.746461 | 0.014047 |
| grey60     | 9984  | GSE3982_EOSINOPHIL_VS_CENT_MEMORY_CD4_TCELL    | 3   | 187 | 16066 | 44   | 5.925984 | 0.014048 |
| pink       | 8636  | GSE14308_TH2_VS_NATURAL_TREG_UP                | 7   | 181 | 16072 | 228  | 2.756882 | 0.014048 |
| blue       | 1736  | CTCNANGTGNV_UNKNOWN                            | 21  | 71  | 16182 | 2978 | 1.614246 | 0.01405  |
| turquoise  | 7823  | WHITFIELD_CELL_CYCLE_G2_M                      | 67  | 205 | 16048 | 4169 | 1.274156 | 0.014063 |
| turquoise  | 2167  | GGTGTGT,MIR-329                                | 32  | 87  | 16166 | 4169 | 1.433945 | 0.014068 |
| purple     | 8760  | GSE15659_RESTING_VS_ACTIVATED_TREG_UP          | 5   | 147 | 16106 | 157  | 3.521166 | 0.014081 |
| red        | 9477  | GSE26495_PD1HIGH_VS_PD1LOW_CD8_TCELL_DN        | 11  | 159 | 16094 | 524  | 2.145842 | 0.014081 |
| tan        | 6148  | MANALO_HYPOXIA_DN                              | 7   | 285 | 15968 | 145  | 2.753079 | 0.014081 |
| blue       | 263   | NEGATIVE_REGULATION_OF_CELLULAR_METABOLIC_P    | 56  | 231 | 16022 | 2978 | 1.323076 | 0.014092 |

|             |       |                                               |    |     |       |      |          |          |
|-------------|-------|-----------------------------------------------|----|-----|-------|------|----------|----------|
| brown       | 3611  | MODULE_123                                    | 40 | 210 | 16043 | 2190 | 1.413612 | 0.014112 |
| magenta     | 10194 | GSE7852_TREG_VS_TCONV_THYMUS_UP               | 6  | 191 | 16062 | 167  | 3.057278 | 0.014125 |
| lightyellow | 1246  | CARBOXYPEPTIDASE_ACTIVITY                     | 1  | 7   | 16246 | 33   | 70.35931 | 0.014129 |
| lightyellow | 2700  | GNF2_SPINK1                                   | 1  | 7   | 16246 | 33   | 70.35931 | 0.014129 |
| lightyellow | 5043  | TONKS_TARGETS_OF_RUNX1_RUNX1T1_FUSION_SUST.   | 1  | 7   | 16246 | 33   | 70.35931 | 0.014129 |
| greenyello  | 10077 | GSE3982_BASOPHIL_VS_NKCELL_DN                 | 5  | 154 | 16099 | 150  | 3.517965 | 0.014132 |
| green       | 850   | POSITIVE_REGULATION_OF_CELL_MIGRATION         | 3  | 7   | 16246 | 1305 | 5.337603 | 0.014133 |
| green       | 1179  | FUCOSYLTRANSFERASE_ACTIVITY                   | 3  | 7   | 16246 | 1305 | 5.337603 | 0.014133 |
| green       | 2700  | GNF2_SPINK1                                   | 3  | 7   | 16246 | 1305 | 5.337603 | 0.014133 |
| pink        | 8714  | GSE14769_UNSTIM_VS_20MIN_LPS_BMDM_UP          | 6  | 140 | 16113 | 228  | 3.055075 | 0.01414  |
| cyan        | 5481  | MYLLYKANGAS_AMPLIFICATION_HOT_SPOT_3          | 1  | 3   | 16250 | 77   | 70.35931 | 0.014146 |
| salmon      | 8462  | GSE11864_UNTREATED_VS_CSF1_IFNG_IN_MAC_UP     | 5  | 182 | 16071 | 127  | 3.515835 | 0.01415  |
| salmon      | 9478  | GSE26669_CTRL_VS_COSTIM_BLOCK_MLR_CD4_TCELL   | 5  | 182 | 16071 | 127  | 3.515835 | 0.01415  |
| salmon      | 9539  | GSE27786_LSK_VS_NKTCELL_DN                    | 5  | 182 | 16071 | 127  | 3.515835 | 0.01415  |
| salmon      | 9867  | GSE360_L_DONOVANI_VS_B_MALAYI_LOW_DOSE_MA     | 5  | 182 | 16071 | 127  | 3.515835 | 0.01415  |
| blue        | 1146  | SINGLE_STRANDED_DNA_BINDING                   | 12 | 34  | 16219 | 2978 | 1.926243 | 0.014164 |
| blue        | 2899  | KEGG_PRIMARY_IMMUNODEFICIENCY                 | 12 | 34  | 16219 | 2978 | 1.926243 | 0.014164 |
| green       | 418   | RESPONSE_TO_LIGHT_STIMULUS                    | 7  | 33  | 16220 | 1305 | 2.641844 | 0.014193 |
| lightgreen  | 8789  | GSE15930_NAIVE_VS_72H_IN_VITRO_STIM_CD8_TCELI | 3  | 197 | 16056 | 42   | 5.893038 | 0.014233 |
| lightgreen  | 9401  | GSE22886_UNSTIM_VS_IL15_STIM_NKCELL_DN        | 3  | 197 | 16056 | 42   | 5.893038 | 0.014233 |
| lightgreen  | 10265 | GSE9650_EXHAUSTED_VS_MEMORY_CD8_TCELL_DN      | 3  | 197 | 16056 | 42   | 5.893038 | 0.014233 |
| turquoise   | 5892  | GOTZMANN_EPITHELIAL_TO_MESENCHYMAL_TRANSIT    | 60 | 181 | 16072 | 4169 | 1.292333 | 0.014234 |
| turquoise   | 8460  | GSE11864_UNTREATED_VS_CSF1_IN_MAC_UP          | 60 | 181 | 16072 | 4169 | 1.292333 | 0.014234 |
| purple      | 131   | CONTRACTILE_FIBER_PART                        | 2  | 19  | 16234 | 157  | 10.89708 | 0.014235 |
| purple      | 5156  | HAHTOLA_MYCOSIS_FUNGOIDES_UP                  | 2  | 19  | 16234 | 157  | 10.89708 | 0.014235 |
| purple      | 5409  | MAHADEVAN_RESPONSE_TO_MP470_UP                | 2  | 19  | 16234 | 157  | 10.89708 | 0.014235 |
| purple      | 6571  | VERRECCHIA_RESPONSE_TO_TGFB1_C1               | 2  | 19  | 16234 | 157  | 10.89708 | 0.014235 |
| purple      | 6927  | KANG_CISPLATIN_RESISTANCE_UP                  | 2  | 19  | 16234 | 157  | 10.89708 | 0.014235 |
| purple      | 7007  | OUYANG_PROSTATE_CANCER_MARKERS                | 2  | 19  | 16234 | 157  | 10.89708 | 0.014235 |
| purple      | 7283  | VILIMAS_NOTCH1_TARGETS_DN                     | 2  | 19  | 16234 | 157  | 10.89708 | 0.014235 |
| purple      | 7399  | FINAK_BREAST_CANCER_SDPP_SIGNATURE            | 2  | 19  | 16234 | 157  | 10.89708 | 0.014235 |
| brown       | 221   | INTEGRIN_COMPLEX                              | 6  | 16  | 16237 | 2190 | 2.783048 | 0.014242 |
| brown       | 2904  | BIOCARTA_RELA_PATHWAY                         | 6  | 16  | 16237 | 2190 | 2.783048 | 0.014242 |
| brown       | 3000  | BIOCARTA_IL10_PATHWAY                         | 6  | 16  | 16237 | 2190 | 2.783048 | 0.014242 |
| brown       | 3089  | BIOCARTA_SPRY_PATHWAY                         | 6  | 16  | 16237 | 2190 | 2.783048 | 0.014242 |
| brown       | 6960  | FINETTI_BREAST_CANCER_KINOME_GREEN            | 6  | 16  | 16237 | 2190 | 2.783048 | 0.014242 |
| greenyello  | 1257  | PROTEIN_TYROSINE_KINASE_ACTIVITY              | 3  | 55  | 16198 | 150  | 5.910182 | 0.014243 |
| cyan        | 9586  | GSE27786_CD4_TCELL_VS_MONO_MAC_UP             | 4  | 197 | 16056 | 77   | 4.285846 | 0.014248 |
| grey60      | 9894  | GSE36392_TYPE_2_MYELOID_VS_NEUTROPHIL_IL25_TI | 3  | 188 | 16065 | 44   | 5.894463 | 0.014249 |
| grey60      | 10042 | GSE3982_MAC_VS_TH1_UP                         | 3  | 188 | 16065 | 44   | 5.894463 | 0.014249 |
| brown       | 3460  | SIG_CHEMOTAXIS                                | 11 | 40  | 16213 | 2190 | 2.040902 | 0.014251 |
| brown       | 4119  | PID_HES_HEYPATHWAY                            | 11 | 40  | 16213 | 2190 | 2.040902 | 0.014251 |
| lightcyan   | 3804  | MODULE_361                                    | 3  | 133 | 16120 | 62   | 5.913049 | 0.01426  |
| blue        | 8637  | GSE14308_TH2_VS_NATURAL_TREG_DN               | 46 | 184 | 16069 | 2978 | 1.364422 | 0.014262 |
| blue        | 9263  | GSE20366_EX_VIVO_VS_DEC205_CONVERSION_DN      | 46 | 184 | 16069 | 2978 | 1.364422 | 0.014262 |
| blue        | 9469  | GSE25087_TREG_VS_TCONV_FETUS_DN               | 46 | 184 | 16069 | 2978 | 1.364422 | 0.014262 |
| blue        | 9699  | GSE29618_PRE_VS_DAY7_POST_LAIV_FLU_VACCINE_M  | 46 | 184 | 16069 | 2978 | 1.364422 | 0.014262 |
| pink        | 1751  | V\$BACH2_01                                   | 8  | 225 | 16028 | 228  | 2.534581 | 0.014262 |
| greenyello  | 5072  | SENESE_HDAC2_TARGETS_DN                       | 4  | 101 | 16152 | 150  | 4.291221 | 0.014265 |
| brown       | 7476  | ROME_INSULIN_TARGETS_IN_MUSCLE_UP             | 74 | 429 | 15824 | 2190 | 1.280159 | 0.014266 |
| cyan        | 1491  | V\$IRF2_01                                    | 3  | 107 | 16146 | 77   | 5.918073 | 0.014267 |
| brown       | 2372  | MORF_DAP                                      | 18 | 78  | 16175 | 2190 | 1.712645 | 0.014271 |
| red         | 903   | ACUTE_INFLAMMATORY_RESPONSE                   | 2  | 6   | 16247 | 524  | 10.33906 | 0.014277 |
| red         | 5317  | LUCAS_HNF4A_TARGETS_DN                        | 2  | 6   | 16247 | 524  | 10.33906 | 0.014277 |
| red         | 5360  | RAMJAUN_APOPTOSIS_BY_TGFB1_VIA_MAPK1_UP       | 2  | 6   | 16247 | 524  | 10.33906 | 0.014277 |
| red         | 7617  | WEBER_METHYLATED_ICP_IN_FIBROBLAST            | 2  | 6   | 16247 | 524  | 10.33906 | 0.014277 |
| red         | 8117  | KINNEY_DNMT1_METHYLATION_TARGETS              | 2  | 6   | 16247 | 524  | 10.33906 | 0.014277 |
| yellow      | 8392  | KAECH_DAY8_EFF_VS_DAY15_EFF_CD8_TCELL_UP      | 27 | 198 | 16055 | 1426 | 1.55422  | 0.014281 |
| red         | 7864  | WANG_RESPONSE_TO_GSK3_INHIBITOR_SB216763_UF   | 20 | 363 | 15890 | 524  | 1.708935 | 0.014299 |
| salmon      | 2488  | GCM_BECN1                                     | 3  | 65  | 16188 | 127  | 5.906602 | 0.014313 |

|             |       |                                             |    |      |       |      |          |          |
|-------------|-------|---------------------------------------------|----|------|-------|------|----------|----------|
| salmon      | 2512  | GCM_DDX5                                    | 3  | 65   | 16188 | 127  | 5.906602 | 0.014313 |
| salmon      | 3666  | MODULE_183                                  | 3  | 65   | 16188 | 127  | 5.906602 | 0.014313 |
| salmon      | 4185  | REACTOME_ORC1_REMOVAL_FROM_CHROMATIN        | 3  | 65   | 16188 | 127  | 5.906602 | 0.014313 |
| salmon      | 4715  | REACTOME_APC_C_CDC20_MEDIATED_DEGRADATION   | 3  | 65   | 16188 | 127  | 5.906602 | 0.014313 |
| salmon      | 6424  | ZAMORA_NOS2_TARGETS_UP                      | 3  | 65   | 16188 | 127  | 5.906602 | 0.014313 |
| brown       | 9988  | GSE3982_EOSINOPHIL_VS_TH1_UP                | 34 | 173  | 16080 | 2190 | 1.458553 | 0.014319 |
| turquoise   | 4723  | REACTOME_SCF_BETA_TRCP_MEDIATED_DEGRADATIO  | 20 | 49   | 16204 | 4169 | 1.59124  | 0.014327 |
| tan         | 7368  | AGUIRRE_PANCREATIC_CANCER_COPY_NUMBER_UP    | 7  | 286  | 15967 | 145  | 2.743453 | 0.01433  |
| lightyellow | 136   | INTEGRAL_TO_PLASMA_MEMBRANE                 | 5  | 721  | 15532 | 33   | 3.4155   | 0.014342 |
| green       | 8289  | ESC_V6.5_UP_EARLY.V1_DN                     | 19 | 138  | 16115 | 1305 | 1.714737 | 0.014363 |
| blue        | 697   | MACROMOLECULE_LOCALIZATION                  | 53 | 217  | 16036 | 2978 | 1.332984 | 0.014364 |
| blue        | 1511  | V\$ZID_01                                   | 53 | 217  | 16036 | 2978 | 1.332984 | 0.014364 |
| greenyello  | 7304  | GOLDRATH_ANTIGEN_RESPONSE                   | 8  | 343  | 15910 | 150  | 2.527191 | 0.01437  |
| purple      | 1672  | V\$GATA1_05                                 | 6  | 204  | 16049 | 157  | 3.044773 | 0.014381 |
| turquoise   | 15    | ORGANELLE_INNER_MEMBRANE                    | 27 | 71   | 16182 | 4169 | 1.482542 | 0.014384 |
| blue        | 2038  | GTCTTCC,MIR-7                               | 38 | 147  | 16106 | 2978 | 1.410831 | 0.014384 |
| blue        | 6996  | MCCABE_BOUND_BY_HOXC6                       | 79 | 342  | 15911 | 2978 | 1.260694 | 0.014387 |
| yellow      | 8553  | GSE13411_NAIVE_VS_MEMORY_BCELL_DN           | 26 | 189  | 16064 | 1426 | 1.567926 | 0.01439  |
| magenta     | 1539  | V\$PBX1_02                                  | 4  | 91   | 16162 | 167  | 4.27795  | 0.014391 |
| magenta     | 8379  | KRAS.PROSTATE_UP.V1_UP                      | 4  | 91   | 16162 | 167  | 4.27795  | 0.014391 |
| blue        | 2491  | GCM_HDAC1                                   | 13 | 38   | 16215 | 2978 | 1.867104 | 0.014402 |
| magenta     | 189   | TRANS_GOLGI_NETWORK                         | 2  | 18   | 16235 | 167  | 10.81371 | 0.014414 |
| magenta     | 217   | COLLAGEN                                    | 2  | 18   | 16235 | 167  | 10.81371 | 0.014414 |
| magenta     | 226   | NEURON_PROJECTION                           | 2  | 18   | 16235 | 167  | 10.81371 | 0.014414 |
| magenta     | 714   | POSITIVE_REGULATION_OF_T_CELL_ACTIVATION    | 2  | 18   | 16235 | 167  | 10.81371 | 0.014414 |
| magenta     | 1104  | RAS_GUANYL_NUCLEOTIDE_EXCHANGE_FACTOR_ACTI  | 2  | 18   | 16235 | 167  | 10.81371 | 0.014414 |
| magenta     | 4834  | DAVICIONI_PAX_FOXO1_SIGNATURE_IN_ARMS_DN    | 2  | 18   | 16235 | 167  | 10.81371 | 0.014414 |
| magenta     | 5992  | NIKOLSKY_BREAST_CANCER_6P24_P22_AMPLICON    | 2  | 18   | 16235 | 167  | 10.81371 | 0.014414 |
| lightgreen  | 8447  | GSE11057_NAIVE_VS_CENT_MEMORY_CD4_TCELL_DN  | 3  | 198  | 16055 | 42   | 5.863276 | 0.014426 |
| lightgreen  | 10205 | GSE7852_LN_VS_THYMUS_TCONV_DN               | 3  | 198  | 16055 | 42   | 5.863276 | 0.014426 |
| blue        | 7451  | ZHAN_EARLY_DIFFERENTIATION_GENES_DN         | 14 | 42   | 16211 | 2978 | 1.81923  | 0.014429 |
| lightcyan   | 6307  | PARK_HSC_AND_MULTIPOTENT_PROGENITORS        | 2  | 48   | 16205 | 62   | 10.92272 | 0.01443  |
| red         | 2142  | RNTCANNRNNYNATTW_UNKNOWN                    | 5  | 45   | 16208 | 524  | 3.446353 | 0.014439 |
| red         | 3480  | SIG_BCR_SIGNALING_PATHWAY                   | 5  | 45   | 16208 | 524  | 3.446353 | 0.014439 |
| red         | 3766  | MODULE_312                                  | 5  | 45   | 16208 | 524  | 3.446353 | 0.014439 |
| brown       | 369   | STRIATED_MUSCLE_DEVELOPMENT                 | 9  | 30   | 16223 | 2190 | 2.226438 | 0.01444  |
| brown       | 2916  | BIOCARTA_AT1R_PATHWAY                       | 9  | 30   | 16223 | 2190 | 2.226438 | 0.01444  |
| brown       | 4009  | PID_IGF1_PATHWAY                            | 9  | 30   | 16223 | 2190 | 2.226438 | 0.01444  |
| brown       | 4069  | PID_AR_NONGENOMIC_PATHWAY                   | 9  | 30   | 16223 | 2190 | 2.226438 | 0.01444  |
| brown       | 4421  | REACTOME_GPVI_MEDIATED_ACTIVATION_CASCADE   | 9  | 30   | 16223 | 2190 | 2.226438 | 0.01444  |
| brown       | 7324  | PARK_TRETINOIN_RESPONSE_AND_PML_RARA_FUSION | 9  | 30   | 16223 | 2190 | 2.226438 | 0.01444  |
| turquoise   | 8920  | GSE17721_LPS_VS_POLYIC_6H_BMDM_UP           | 62 | 188  | 16065 | 4169 | 1.285688 | 0.014456 |
| turquoise   | 8947  | GSE17721_POLYIC_VS_PAM3CSK4_24H_BMDM_DN     | 62 | 188  | 16065 | 4169 | 1.285688 | 0.014456 |
| salmon      | 8624  | GSE14000_4H_VS_16H_LPS_DC_UP                | 5  | 183  | 16070 | 127  | 3.496622 | 0.014459 |
| salmon      | 9047  | GSE17721_LPS_VS_CPG_6H_BMDM_DN              | 5  | 183  | 16070 | 127  | 3.496622 | 0.014459 |
| salmon      | 9051  | GSE17721_LPS_VS_CPG_12H_BMDM_DN             | 5  | 183  | 16070 | 127  | 3.496622 | 0.014459 |
| salmon      | 9471  | GSE25087_TREG_VS_TCONV_ADULT_DN             | 5  | 183  | 16070 | 127  | 3.496622 | 0.014459 |
| magenta     | 8556  | GSE13411_IGM_MEMORY_BCELL_VS_PLASMA_CELL_U  | 6  | 192  | 16061 | 167  | 3.041355 | 0.014461 |
| lightgreen  | 5855  | FRIDMAN_SENESCENCE_UP                       | 2  | 71   | 16182 | 42   | 10.90074 | 0.014474 |
| lightgreen  | 6443  | BROWNE_HCMV_INFECTION_16HR_DN               | 2  | 71   | 16182 | 42   | 10.90074 | 0.014474 |
| cyan        | 9667  | GSE29618_BCELL_VS_MONOCYTE_DAY7_FLU_VACCINE | 4  | 198  | 16055 | 77   | 4.2642   | 0.01449  |
| red         | 9259  | GSE20366_TREG_VS_TCONV_DN                   | 12 | 181  | 16072 | 524  | 2.056387 | 0.014496 |
| red         | 9889  | GSE360_LOW_DOSE_B_MALAYI_VS_M_TUBERCULOSIS  | 12 | 181  | 16072 | 524  | 2.056387 | 0.014496 |
| greenyello  | 9494  | GSE26928_EFF_MEMORY_VS_CXCR5_POS_CD4_TCELL  | 5  | 155  | 16098 | 150  | 3.495269 | 0.014498 |
| purple      | 5956  | SUNG_METASTASIS_STROMA_UP                   | 4  | 97   | 16156 | 157  | 4.268961 | 0.014507 |
| purple      | 1461  | AACTTT_UNKNOWN                              | 23 | 1473 | 14780 | 157  | 1.616438 | 0.014515 |
| lightcyan   | 5334  | DARWICHE_PAPILLOMA_RISK_LOW_UP              | 3  | 134  | 16119 | 62   | 5.868922 | 0.014548 |
| purple      | 4748  | REACTOME_MEIOTIC_SYNAPSIS                   | 3  | 53   | 16200 | 157  | 5.859752 | 0.014559 |
| grey60      | 455   | AMINO_ACID_METABOLIC_PROCESS                | 2  | 68   | 16185 | 44   | 10.8643  | 0.014571 |
| turquoise   | 2155  | GTACAGG,MIR-486                             | 19 | 46   | 16207 | 4169 | 1.610265 | 0.014576 |

|            |       |                                               |     |      |       |      |          |          |
|------------|-------|-----------------------------------------------|-----|------|-------|------|----------|----------|
| turquoise  | 4012  | PID_PLK1_PATHWAY                              | 19  | 46   | 16207 | 4169 | 1.610265 | 0.014576 |
| brown      | 5268  | BARIS_THYROID_CANCER_DN                       | 14  | 56   | 16197 | 2190 | 1.855365 | 0.01459  |
| lightgreen | 8394  | KAECH_DAY8_EFF_VS_MEMORY_CD8_TCELL_UP         | 3   | 199  | 16054 | 42   | 5.833812 | 0.014621 |
| cyan       | 3688  | MODULE_208                                    | 3   | 108  | 16145 | 77   | 5.863276 | 0.014626 |
| turquoise  | 6568  | YAMAZAKI_TCEB3_TARGETS_DN                     | 64  | 195  | 16058 | 4169 | 1.27952  | 0.014646 |
| turquoise  | 9210  | GSE17974_0.5H_VS_72H_IL4_AND_ANTI_IL12_ACT_CD | 64  | 195  | 16058 | 4169 | 1.27952  | 0.014646 |
| turquoise  | 9904  | GSE36476_CTRL_VS_TSST_ACT_40H_MEMORY_CD4_T    | 64  | 195  | 16058 | 4169 | 1.27952  | 0.014646 |
| brown      | 621   | POSITIVE_REGULATION_OF_CYTOKINE_SECRETION     | 4   | 8    | 16245 | 2190 | 3.710731 | 0.014652 |
| brown      | 7073  | ITO_PTTG1_TARGETS_DN                          | 4   | 8    | 16245 | 2190 | 3.710731 | 0.014652 |
| brown      | 7126  | MATZUK_PREOVULATORY_FOLLICLE                  | 4   | 8    | 16245 | 2190 | 3.710731 | 0.014652 |
| brown      | 7766  | MARIADASON_RESPONSE_TO_BUTYRATE_CURCUMIN_     | 4   | 8    | 16245 | 2190 | 3.710731 | 0.014652 |
| brown      | 7796  | BANDRES_RESPONSE_TO_CARMUSTIN_WITHOUT_MGI     | 4   | 8    | 16245 | 2190 | 3.710731 | 0.014652 |
| grey60     | 9266  | GSE20366_EX_VIVO_VS_DEC205_CONVERSION_NAIVE_  | 3   | 190  | 16063 | 44   | 5.832416 | 0.014656 |
| grey60     | 10019 | GSE3982_DC_VS_BASOPHIL_DN                     | 3   | 190  | 16063 | 44   | 5.832416 | 0.014656 |
| turquoise  | 2119  | AGTCTAG,MIR-151                               | 9   | 17   | 16236 | 4169 | 2.063931 | 0.014669 |
| magenta    | 884   | NEURON_DEVELOPMENT                            | 3   | 50   | 16203 | 167  | 5.839401 | 0.014671 |
| magenta    | 4800  | WINTER_HYPOXIA_DN                             | 3   | 50   | 16203 | 167  | 5.839401 | 0.014671 |
| magenta    | 7099  | BERNARD_PPAPDC1B_TARGETS_DN                   | 3   | 50   | 16203 | 167  | 5.839401 | 0.014671 |
| blue       | 7688  | DANG_REGULATED_BY_MYC_UP                      | 20  | 67   | 16186 | 2978 | 1.629161 | 0.014695 |
| brown      | 911   | PROTEIN_MODIFICATION_PROCESS                  | 95  | 569  | 15684 | 2190 | 1.239084 | 0.014697 |
| red        | 8869  | GSE17721_CTRL_VS_PAM3CSK4_2H_BMDM_DN          | 11  | 160  | 16093 | 524  | 2.132431 | 0.014698 |
| red        | 9916  | GSE36476_YOUNG_VS_OLD_DONOR_MEMORY_CD4_T      | 11  | 160  | 16093 | 524  | 2.132431 | 0.014698 |
| blue       | 8908  | GSE17721_CTRL_VS_GARDIQUIMOD_12H_BMDM_UP      | 47  | 189  | 16064 | 2978 | 1.357203 | 0.014705 |
| blue       | 9314  | GSE22886_NAIVE_TCELL_VS_NKCELL_UP             | 47  | 189  | 16064 | 2978 | 1.357203 | 0.014705 |
| turquoise  | 2606  | GNF2_SMC4L1                                   | 31  | 84   | 16169 | 4169 | 1.438746 | 0.014713 |
| black      | 8088  | DELACROIX_RARG_BOUND_MEF                      | 12  | 335  | 15918 | 283  | 2.057233 | 0.014716 |
| turquoise  | 8465  | GSE11864_UNTREATED_VS_CSF1_PAM3CYS_IN_MAC_    | 57  | 171  | 16082 | 4169 | 1.299512 | 0.014723 |
| turquoise  | 6270  | STONER_ESOPHAGEAL_CARCIINOGENESIS_UP          | 15  | 34   | 16219 | 4169 | 1.719943 | 0.014724 |
| tan        | 8747  | GSE15659_NAIVE_CD4_TCELL_VS_RESTING_TREG_DN   | 5   | 161  | 16092 | 145  | 3.481045 | 0.014731 |
| green      | 8276  | CTIP_DN.V1_UP                                 | 14  | 92   | 16161 | 1305 | 1.895236 | 0.014734 |
| green      | 9633  | GSE29614_CTRL_VS_DAY3_TIV_FLU_VACCINE_PBMC_I  | 14  | 92   | 16161 | 1305 | 1.895236 | 0.014734 |
| blue       | 9382  | GSE22886_TH1_VS_TH2_12H_ACT_UP                | 44  | 175  | 16078 | 2978 | 1.372219 | 0.014735 |
| cyan       | 9671  | GSE29618_BCELL_VS_MDC_DAY7_FLU_VACCINE_DN     | 4   | 199  | 16054 | 77   | 4.242772 | 0.014735 |
| brown      | 8060  | WAKABAYASHI_ADIPOGENESIS_PPARG_BOUND_8D       | 102 | 616  | 15637 | 2190 | 1.228878 | 0.014737 |
| turquoise  | 7686  | ZHAN_MULTIPLE_MYELOMA_MS_DN                   | 18  | 43   | 16210 | 4169 | 1.631946 | 0.01476  |
| brown      | 8212  | CYCLIN_D1_UP.V1_UP                            | 31  | 155  | 16098 | 2190 | 1.484292 | 0.01476  |
| salmon     | 8434  | GSE10325_CD4_TCELL_VS_LUPUS_CD4_TCELL_UP      | 5   | 184  | 16069 | 127  | 3.477619 | 0.014772 |
| salmon     | 8644  | GSE14308_TH1_VS_NATURAL_TREG_UP               | 5   | 184  | 16069 | 127  | 3.477619 | 0.014772 |
| salmon     | 9985  | GSE3982_EOSINOPHIL_VS_CENT_MEMORY_CD4_TCELL   | 5   | 184  | 16069 | 127  | 3.477619 | 0.014772 |
| magenta    | 9724  | GSE30962_PRIMARY_VS_SECONDARY_CHRONIC_LCMV    | 6   | 193  | 16060 | 167  | 3.025596 | 0.014802 |
| magenta    | 10167 | GSE7460_CTRL_VS_TGFB_TREATED_ACT_TCONV_DN     | 6   | 193  | 16060 | 167  | 3.025596 | 0.014802 |
| magenta    | 10198 | GSE7852_LN_VS_THYMUS_TREG_UP                  | 6   | 193  | 16060 | 167  | 3.025596 | 0.014802 |
| turquoise  | 8745  | GSE15659_NAIVE_VS_PTPRC_NEG_CD4_TCELL_DN      | 52  | 154  | 16099 | 4169 | 1.316389 | 0.014814 |
| magenta    | 8714  | GSE14769_UNSTIM_VS_20MIN_LPS_BMDM_UP          | 5   | 140  | 16113 | 167  | 3.475834 | 0.014816 |
| lightgreen | 8402  | GOLDRATH_EFF_VS_MEMORY_CD8_TCELL_UP           | 3   | 200  | 16053 | 42   | 5.804643 | 0.014818 |
| yellow     | 3198  | chr22q11                                      | 19  | 127  | 16126 | 1426 | 1.705155 | 0.014837 |
| pink       | 8369  | KRAS.600.LUNG.BREAST_UP.V1_UP                 | 7   | 183  | 16070 | 228  | 2.726752 | 0.014843 |
| pink       | 9425  | GSE24142_DN2_VS_DN3_THYMOCYTE_FETAL_DN        | 7   | 183  | 16070 | 228  | 2.726752 | 0.014843 |
| turquoise  | 3558  | MODULE_69                                     | 138 | 457  | 15796 | 4169 | 1.177239 | 0.014852 |
| red        | 157   | ACTIN_CYTOSKELETON                            | 9   | 119  | 16134 | 524  | 2.345837 | 0.014856 |
| turquoise  | 2611  | GNF2_ANP32B                                   | 16  | 37   | 16216 | 4169 | 1.685854 | 0.014858 |
| turquoise  | 646   | PROTEIN_UBIQUITINATION                        | 17  | 40   | 16213 | 4169 | 1.656878 | 0.014861 |
| brown      | 7806  | SASSON_RESPONSE_TO_GONADOTROPHINS_UP          | 19  | 84   | 16169 | 2190 | 1.678664 | 0.014862 |
| green      | 3769  | MODULE_316                                    | 8   | 41   | 16212 | 1305 | 2.430128 | 0.014865 |
| green      | 7784  | DAZARD_UV_RESPONSE_CLUSTER_G28                | 5   | 19   | 16234 | 1305 | 3.277475 | 0.014867 |
| brown      | 8862  | GSE17721_CTRL_VS_POLYIC_24H_BMDM_UP           | 37  | 192  | 16061 | 2190 | 1.430177 | 0.014874 |
| brown      | 9564  | GSE27786_BCELL_VS_CD8_TCELL_UP                | 37  | 192  | 16061 | 2190 | 1.430177 | 0.014874 |
| pink       | 117   | CELL_CORTEX                                   | 3   | 37   | 16216 | 228  | 5.779872 | 0.014905 |
| pink       | 2240  | CAGGTG_V\$E12_Q6                              | 40  | 2020 | 14233 | 228  | 1.411586 | 0.01492  |
| red        | 2046  | TTGCCAA,MIR-182                               | 17  | 294  | 15959 | 524  | 1.79351  | 0.014925 |

|             |                                                    |    |      |       |      |          |          |
|-------------|----------------------------------------------------|----|------|-------|------|----------|----------|
| magenta     | 8276 CTIP_DN.V1_UP                                 | 4  | 92   | 16161 | 167  | 4.23145  | 0.014928 |
| lightyellow | 7902 OHGUCHI_LIVER_HNF4A_TARGETS_DN                | 2  | 92   | 16161 | 33   | 10.70685 | 0.014933 |
| lightyellow | 8377 KRAS.LUNG.BREAST_UP.V1_UP                     | 2  | 92   | 16161 | 33   | 10.70685 | 0.014933 |
| turquoise   | 7355 CHANG_CORE_SERUM_RESPONSE_UP                  | 68 | 209  | 16044 | 4169 | 1.268423 | 0.014939 |
| red         | 4914 DIAZ_CHRONIC_MEYLOGENOUS_LEUKEMIA_UP          | 59 | 1378 | 14875 | 524  | 1.328021 | 0.01496  |
| lightcyan   | 6936 HELLER_HDAC_TARGETS_SILENCED_BY_METHYLATION   | 5  | 381  | 15872 | 62   | 3.440225 | 0.014971 |
| salmon      | 229 NUCLEOLUS                                      | 4  | 121  | 16132 | 127  | 4.230624 | 0.014976 |
| salmon      | 4224 REACTOME_SIGNALING_BY_THE_B_CELL_RECEPTOR_B   | 4  | 121  | 16132 | 127  | 4.230624 | 0.014976 |
| black       | 2945 BIOCARTA_COMP_PATHWAY                         | 2  | 11   | 16242 | 283  | 10.44202 | 0.01498  |
| black       | 4536 REACTOME_MRNA_DECAY_BY_3_TO_5_EXORIBONUCL     | 2  | 11   | 16242 | 283  | 10.44202 | 0.01498  |
| cyan        | 9437 GSE24634_NAIVE_CD4_TCELL_VS_DAY7_IL4_CONV_TR  | 4  | 200  | 16053 | 77   | 4.221558 | 0.014983 |
| cyan        | 9672 GSE29618_MONOCYTE_VS_PDC_DAY7_FLU_VACCINE_    | 4  | 200  | 16053 | 77   | 4.221558 | 0.014983 |
| turquoise   | 8951 GSE17721_PAM3CSK4_VS_CPG_1H_BMDM_DN           | 59 | 178  | 16075 | 4169 | 1.292212 | 0.014993 |
| purple      | 5149 GOZGIT_ESR1_TARGETS_DN                        | 12 | 608  | 15645 | 157  | 2.043203 | 0.015001 |
| pink        | 6957 MARTINEZ_RB1_AND_TP53_TARGETS_UP              | 14 | 519  | 15734 | 228  | 1.922912 | 0.015012 |
| brown       | 1918 V\$SP1_Q4_Q1                                  | 44 | 236  | 16017 | 2190 | 1.383662 | 0.01504  |
| red         | 3082 BIOCARTA_IL1R_PATHWAY                         | 4  | 30   | 16223 | 524  | 4.135623 | 0.01506  |
| red         | 7997 KIM_TIAL1_TARGETS                             | 4  | 30   | 16223 | 524  | 4.135623 | 0.01506  |
| grey60      | 515 CELLULAR_CATABOLIC_PROCESS                     | 3  | 192  | 16061 | 44   | 5.771662 | 0.01507  |
| grey60      | 8458 GSE11057_PBMC_VS_MEM_CD4_TCELL_UP             | 3  | 192  | 16061 | 44   | 5.771662 | 0.01507  |
| grey60      | 8662 GSE1432_CTRL_VS_IFNG_24H_MICROGLIA_UP         | 3  | 192  | 16061 | 44   | 5.771662 | 0.01507  |
| red         | 8776 GSE15930_NAIVE_VS_24H_IN_VITRO_STIM_CD8_TCELI | 12 | 182  | 16071 | 524  | 2.045088 | 0.015083 |
| red         | 10035 GSE3982_MAC_VS_BASOPHIL_DN                   | 12 | 182  | 16071 | 524  | 2.045088 | 0.015083 |
| salmon      | 9868 GSE360_L_DONOVANI_VS_M_TUBERCULOSIS_MAC_UF    | 5  | 185  | 16068 | 127  | 3.458821 | 0.01509  |
| salmon      | 9987 GSE3982_EOSINOPHIL_VS_NKCELL_DN               | 5  | 185  | 16068 | 127  | 3.458821 | 0.01509  |
| purple      | 84 CELL_FRACTION                                   | 9  | 397  | 15856 | 157  | 2.346853 | 0.015098 |
| brown       | 8516 GSE12845_IGD_NEG_BLOOD_VS_DARKZONE_GC_TONS    | 36 | 186  | 16067 | 2190 | 1.436412 | 0.015113 |
| brown       | 8999 GSE17721_LPS_VS_PAM3CSK4_16H_BMDM_DN          | 36 | 186  | 16067 | 2190 | 1.436412 | 0.015113 |
| blue        | 8775 GSE15767_MED_VS_SCS_MAC_LN_DN                 | 48 | 194  | 16059 | 2978 | 1.350356 | 0.015136 |
| magenta     | 1795 V\$LBP1_Q6                                    | 6  | 194  | 16059 | 167  | 3.010001 | 0.015148 |
| magenta     | 7144 BOQUEST_STEM_CELL_DN                          | 6  | 194  | 16059 | 167  | 3.010001 | 0.015148 |
| magenta     | 10047 GSE3982_NEUTROPHIL_VS_BCELL_DN               | 6  | 194  | 16059 | 167  | 3.010001 | 0.015148 |
| yellow      | 8308 CRX_DN.V1_UP                                  | 17 | 110  | 16143 | 1426 | 1.76145  | 0.015171 |
| turquoise   | 5846 GARCIA_TARGETS_OF_FLI1_AND_DAX1_DN            | 54 | 161  | 16092 | 4169 | 1.307584 | 0.015185 |
| blue        | 4183 REACTOME_CELL_CYCLE                           | 86 | 377  | 15876 | 2978 | 1.24499  | 0.015186 |
| yellow      | 9907 GSE36476_CTRL_VS_TSST_ACT_72H_MEMORY_CD4_T    | 27 | 199  | 16054 | 1426 | 1.54641  | 0.015187 |
| blue        | 2301 MORF_CTBP1                                    | 42 | 166  | 16087 | 2978 | 1.380861 | 0.015192 |
| blue        | 8538 GSE13306_TREG_VS_TCONV_UP                     | 42 | 166  | 16087 | 2978 | 1.380861 | 0.015192 |
| greenyello  | 2131 RNGTGGGC_UNKNOWN                              | 12 | 638  | 15615 | 150  | 2.037994 | 0.015209 |
| brown       | 4446 REACTOME_AXON_GUIDANCE                        | 40 | 211  | 16042 | 2190 | 1.406912 | 0.015213 |
| blue        | 8547 GSE13411_NAIVE_VS_IGM_MEMORY_BCELL_DN         | 45 | 180  | 16073 | 2978 | 1.364422 | 0.015223 |
| blue        | 9809 GSE360_CTRL_VS_T_GONDII_MAC_DN                | 45 | 180  | 16073 | 2978 | 1.364422 | 0.015223 |
| turquoise   | 8735 GSE15324_NAIVE_VS_ACTIVATED_CD8_TCELL_DN      | 61 | 185  | 16068 | 4169 | 1.285463 | 0.015226 |
| turquoise   | 9106 GSE17721_0.5H_VS_8H_POLYIC_BMDM_UP            | 61 | 185  | 16068 | 4169 | 1.285463 | 0.015226 |
| turquoise   | 10240 GSE9037_CTRL_VS_LPS_1H_STIM_BMDM_UP          | 61 | 185  | 16068 | 4169 | 1.285463 | 0.015226 |
| midnightb   | 5336 DARWICHE_PAPILLOMA_RISK_HIGH_UP               | 3  | 119  | 16134 | 71   | 5.770979 | 0.015245 |
| lightgreen  | 7362 VANASSE_BCL2_TARGETS_DN                       | 2  | 73   | 16180 | 42   | 10.60209 | 0.015257 |
| grey60      | 3272 chr17p13                                      | 3  | 193  | 16060 | 44   | 5.741757 | 0.01528  |
| grey60      | 6329 AFFAR_YY1_TARGETS_DN                          | 3  | 193  | 16060 | 44   | 5.741757 | 0.01528  |
| grey60      | 9101 GSE17721_12H_VS_24H_LPS_BMDM_DN               | 3  | 193  | 16060 | 44   | 5.741757 | 0.01528  |
| grey60      | 9447 GSE24634_TREG_VS_TCONV_POST_DAY10_IL4_CONVE   | 3  | 193  | 16060 | 44   | 5.741757 | 0.01528  |
| yellow      | 6674 SCHLINGEMANN_SKIN_CARCINOGENESIS_TPA_DN       | 6  | 24   | 16229 | 1426 | 2.849404 | 0.015304 |
| purple      | 4870 DAVICIONI_RHABDOMYOSARCOMA_PAX_FOXO1_FUSII    | 3  | 54   | 16199 | 157  | 5.751238 | 0.015308 |
| lightyellow | 14 INTRINSIC_TO_PLASMA_MEMBRANE                    | 5  | 733  | 15520 | 33   | 3.359585 | 0.015312 |
| purple      | 6819 CREIGHTON_ENDOCRINE_THERAPY_RESISTANCE_2      | 9  | 398  | 15855 | 157  | 2.340956 | 0.015324 |
| brown       | 4982 OSMAN_BLADDER_CANCER_DN                       | 68 | 391  | 15862 | 2190 | 1.290689 | 0.015344 |
| blue        | 841 NEGATIVE_REGULATION_OF_METABOLIC_PROCESS       | 56 | 232  | 16021 | 2978 | 1.317373 | 0.015345 |
| purple      | 1785 V\$EFC_Q6                                     | 6  | 207  | 16046 | 157  | 3.000646 | 0.015353 |
| cyan        | 7340 POTTI_ETOPOSIDE_SENSITIVITY                   | 2  | 40   | 16213 | 77   | 10.5539  | 0.015383 |
| red         | 6620 GENTILE_UV_HIGH_DOSE_DN                       | 17 | 295  | 15958 | 524  | 1.78743  | 0.015384 |



|             |                                                     |    |      |       |      |          |          |
|-------------|-----------------------------------------------------|----|------|-------|------|----------|----------|
| salmon      | 232 CHROMOSOME                                      | 4  | 122  | 16131 | 127  | 4.195947 | 0.015392 |
| salmon      | 6074 BYSTRYKH_HEMATOPOIESIS_STEM_CELL_QTL_CIS       | 4  | 122  | 16131 | 127  | 4.195947 | 0.015392 |
| brown       | 879 NOTCH_SIGNALING_PATHWAY                         | 5  | 12   | 16241 | 2190 | 3.092275 | 0.015399 |
| brown       | 2909 BIOCARTA_GRANULOCYTES_PATHWAY                  | 5  | 12   | 16241 | 2190 | 3.092275 | 0.015399 |
| brown       | 2946 BIOCARTA_VDR_PATHWAY                           | 5  | 12   | 16241 | 2190 | 3.092275 | 0.015399 |
| brown       | 3199 chr7p11                                        | 5  | 12   | 16241 | 2190 | 3.092275 | 0.015399 |
| brown       | 3633 MODULE_148                                     | 5  | 12   | 16241 | 2190 | 3.092275 | 0.015399 |
| brown       | 3674 MODULE_194                                     | 5  | 12   | 16241 | 2190 | 3.092275 | 0.015399 |
| brown       | 4369 REACTOME_NOTCH_HLH_TRANSCRIPTION_PATHWAY       | 5  | 12   | 16241 | 2190 | 3.092275 | 0.015399 |
| brown       | 6168 KUOKAWA_LIVER_CANCER_CHEMOTHERAPY_UP           | 5  | 12   | 16241 | 2190 | 3.092275 | 0.015399 |
| brown       | 6997 POS_RESPONSE_TO_HISTAMINE_UP                   | 5  | 12   | 16241 | 2190 | 3.092275 | 0.015399 |
| brown       | 7323 PARK_TRETINOIN_RESPONSE                        | 5  | 12   | 16241 | 2190 | 3.092275 | 0.015399 |
| lightgreen  | 3863 MODULE_454                                     | 1  | 6    | 16247 | 42   | 64.49603 | 0.015407 |
| lightgreen  | 4836 FOURNIER_ACINAR_DEVELOPMENT_EARLY_DN           | 1  | 6    | 16247 | 42   | 64.49603 | 0.015407 |
| lightgreen  | 5806 FREDERICK_PRKCI_TARGETS                        | 1  | 6    | 16247 | 42   | 64.49603 | 0.015407 |
| lightgreen  | 7946 KIM_GLIS2_TARGETS_DN                           | 1  | 6    | 16247 | 42   | 64.49603 | 0.015407 |
| salmon      | 8649 GSE14308_TH17_VS_INDUCED_TREG_DN               | 5  | 186  | 16067 | 127  | 3.440225 | 0.015413 |
| salmon      | 9001 GSE17721_LPS_VS_PAM3CSK4_24H_BMDM_DN           | 5  | 186  | 16067 | 127  | 3.440225 | 0.015413 |
| turquoise   | 10210 GSE7852_TREG_VS_TCONV_UP                      | 63 | 192  | 16061 | 4169 | 1.279207 | 0.015424 |
| yellow      | 8613 GSE14000_TRANSLATED_RNA_VS_MRNA_16H_LPS_DC     | 25 | 181  | 16072 | 1426 | 1.574256 | 0.015428 |
| lightcyan   | 8213 CSR_EARLY_UP.V1_DN                             | 3  | 137  | 16116 | 62   | 5.740405 | 0.015431 |
| red         | 4583 REACTOME_SIGNALING_BY_ILS                      | 8  | 100  | 16153 | 524  | 2.481374 | 0.015468 |
| magenta     | 2100 ACATATC,MIR-190                                | 3  | 51   | 16202 | 167  | 5.724903 | 0.015472 |
| magenta     | 8453 GSE11057_CD4_EFF_MEM_VS_PBMC_DN                | 6  | 195  | 16058 | 167  | 2.994565 | 0.0155   |
| magenta     | 8890 GSE17721_CTRL_VS_CPG_8H_BMDM_UP                | 6  | 195  | 16058 | 167  | 2.994565 | 0.0155   |
| turquoise   | 5741 PUJANA_XPRSS_INT_NETWORK                       | 56 | 168  | 16085 | 4169 | 1.299512 | 0.01551  |
| purple      | 50 MEMBRANE_PART                                    | 21 | 1316 | 14937 | 157  | 1.651951 | 0.015514 |
| turquoise   | 6089 KIM_GERMINAL_CENTER_T_HELPER_UP                | 25 | 65   | 16188 | 4169 | 1.499437 | 0.015517 |
| brown       | 4078 PID_KITPATHWAY                                 | 13 | 51   | 16202 | 2190 | 1.891745 | 0.015522 |
| brown       | 5974 MORI_IMMATURE_B_LYMPHOCYTE_UP                  | 13 | 51   | 16202 | 2190 | 1.891745 | 0.015522 |
| salmon      | 4865 ZHONG_RESPONSE_TO_AZACITIDINE_AND_TSA_DN       | 3  | 67   | 16186 | 127  | 5.730286 | 0.015523 |
| salmon      | 7688 DANG_REGULATED_BY_MYC_UP                       | 3  | 67   | 16186 | 127  | 5.730286 | 0.015523 |
| red         | 3657 MODULE_174                                     | 7  | 81   | 16172 | 524  | 2.680497 | 0.015525 |
| red         | 3748 MODULE_289                                     | 7  | 81   | 16172 | 524  | 2.680497 | 0.015525 |
| purple      | 6049 LE_EGR2_TARGETS_DN                             | 4  | 99   | 16154 | 157  | 4.182719 | 0.015531 |
| lightyellow | 7041 ACEVEDO_LIVER_CANCER_WITH_H3K9ME3_DN           | 2  | 94   | 16159 | 33   | 10.47905 | 0.015553 |
| brown       | 5295 MCBRYAN_PUBERTAL_BREAST_4_5WK_DN               | 34 | 174  | 16079 | 2190 | 1.450171 | 0.015559 |
| brown       | 9970 GSE3982_EOSINOPHIL_VS_MAST_CELL_UP             | 34 | 174  | 16079 | 2190 | 1.450171 | 0.015559 |
| salmon      | 3205 chr4q33                                        | 1  | 2    | 16251 | 127  | 63.98819 | 0.015567 |
| greenyello  | 7863 CHICAS_RB1_TARGETS_CONFLUENT                   | 10 | 490  | 15763 | 150  | 2.211293 | 0.015568 |
| turquoise   | 8603 GSE13738_RESTING_VS_TCR_ACTIVATED_CD4_TCELL_I  | 65 | 199  | 16054 | 4169 | 1.273391 | 0.015591 |
| turquoise   | 8783 GSE15930_NAIVE_VS_48H_IN_VITRO_STIM_CD8_TCELLI | 65 | 199  | 16054 | 4169 | 1.273391 | 0.015591 |
| turquoise   | 9167 GSE17974_0H_VS_72H_IN_VITRO_ACT_CD4_TCELL_DN   | 65 | 199  | 16054 | 4169 | 1.273391 | 0.015591 |
| yellow      | 81 SPINDLE                                          | 8  | 38   | 16215 | 1426 | 2.399498 | 0.015592 |
| yellow      | 143 RIBOSOME                                        | 8  | 38   | 16215 | 1426 | 2.399498 | 0.015592 |
| black       | 5025 HOEBEKE_LYMPHOID_STEM_CELL_DN                  | 5  | 84   | 16169 | 283  | 3.418518 | 0.015618 |
| greenyello  | 9304 GSE22045_TREG_VS_TCONV_UP                      | 5  | 158  | 16095 | 150  | 3.428903 | 0.015632 |
| salmon      | 62 CYTOPLASM                                        | 24 | 1950 | 14303 | 127  | 1.575094 | 0.015651 |
| lightgreen  | 2827 KEGG_TGF_BETA_SIGNALING_PATHWAY                | 2  | 74   | 16179 | 42   | 10.45882 | 0.015655 |
| lightgreen  | 3655 MODULE_172                                     | 2  | 74   | 16179 | 42   | 10.45882 | 0.015655 |
| magenta     | 1991 AACTGG,MIR-199A,MIR-199B                       | 5  | 142  | 16111 | 167  | 3.426879 | 0.015665 |
| magenta     | 8288 ESC_J1_UP_LATE.V1_UP                           | 5  | 142  | 16111 | 167  | 3.426879 | 0.015665 |
| pink        | 1822 V\$TEF1_Q6                                     | 7  | 185  | 16068 | 228  | 2.697274 | 0.015669 |
| pink        | 10010 GSE3982_MAST_CELL_VS_TH2_UP                   | 7  | 185  | 16068 | 228  | 2.697274 | 0.015669 |
| pink        | 10028 GSE3982_DC_VS_TH2_UP                          | 7  | 185  | 16068 | 228  | 2.697274 | 0.015669 |
| pink        | 300 ESTABLISHMENT_OF_LOCALIZATION                   | 18 | 735  | 15518 | 228  | 1.745757 | 0.015671 |
| greenyello  | 5353 DARWICHE_PAPILLOMA_PROGRESSION_RISK            | 3  | 57   | 16196 | 150  | 5.702807 | 0.015676 |
| brown       | 5394 PEREZ_TP63_TARGETS                             | 53 | 294  | 15959 | 2190 | 1.337882 | 0.015682 |
| blue        | 6055 TARTE_PLASMA_CELL_VS_B_LYMPHOCYTE_UP           | 22 | 76   | 16177 | 2978 | 1.579858 | 0.015687 |
| red         | 8918 GSE17721_LPS_VS_POLYIC_4H_BMDM_UP              | 12 | 183  | 16070 | 524  | 2.033913 | 0.015688 |

|             |       |                                               |    |     |       |      |          |          |
|-------------|-------|-----------------------------------------------|----|-----|-------|------|----------|----------|
| red         | 9898  | GSE36392_EOSINOPHIL_VS_NEUTROPHIL_IL25_TREATE | 12 | 183 | 16070 | 524  | 2.033913 | 0.015688 |
| red         | 10069 | GSE3982_BCELL_VS_TH1_DN                       | 12 | 183 | 16070 | 524  | 2.033913 | 0.015688 |
| blue        | 9741  | GSE31082_CD4_VS_CD8_SP_THYMOCYTE_DN           | 46 | 185 | 16068 | 2978 | 1.357047 | 0.015696 |
| blue        | 9952  | GSE3982_CTRL_VS_LPS_4H_MAC_UP                 | 46 | 185 | 16068 | 2978 | 1.357047 | 0.015696 |
| brown       | 1753  | V\$STAT1_02                                   | 42 | 224 | 16029 | 2190 | 1.391524 | 0.015711 |
| brown       | 1381  | TRANSFERASE_ACTIVITY_TRANSFERRING_PHOSPHORU!  | 69 | 398 | 15855 | 2190 | 1.286635 | 0.015715 |
| purple      | 44    | CONTRACTILE_FIBER                             | 2  | 20  | 16233 | 157  | 10.35223 | 0.015718 |
| purple      | 3995  | PID_S1P_S1P1_PATHWAY                          | 2  | 20  | 16233 | 157  | 10.35223 | 0.015718 |
| purple      | 4508  | REACTOME_TIGHT_JUNCTION_INTERACTIONS          | 2  | 20  | 16233 | 157  | 10.35223 | 0.015718 |
| purple      | 5649  | MURATA_VIRULENCE_OF_H_PILORI                  | 2  | 20  | 16233 | 157  | 10.35223 | 0.015718 |
| purple      | 6595  | PAL_PRMT5_TARGETS_DN                          | 2  | 20  | 16233 | 157  | 10.35223 | 0.015718 |
| blue        | 9400  | GSE22886_UNSTIM_VS_IL15_STIM_NKCELL_UP        | 43 | 171 | 16082 | 2978 | 1.372402 | 0.01573  |
| greenyello  | 7978  | AZARE_NEOPLASTIC_TRANSFORMATION_BY_STAT3_DN   | 4  | 104 | 16149 | 150  | 4.167436 | 0.01573  |
| cyan        | 5283  | WANG_ESOPHAGUS_CANCER_VS_NORMAL_UP            | 3  | 111 | 16142 | 77   | 5.704809 | 0.015732 |
| green       | 7565  | MIKKELSEN_MCV6_HCP_WITH_H3K27ME3              | 30 | 248 | 16005 | 1305 | 1.506581 | 0.015738 |
| salmon      | 8420  | GSE10239_MEMORY_VS_DAY4.5_EFF_CD8_TCELL_UP    | 5  | 187 | 16066 | 127  | 3.421828 | 0.01574  |
| cyan        | 1722  | V\$STAT5A_01                                  | 4  | 203 | 16050 | 77   | 4.159171 | 0.015743 |
| red         | 2872  | KEGG_AMYOTROPHIC_LATERAL_SCLEROSIS_ALS        | 5  | 46  | 16207 | 524  | 3.371432 | 0.015783 |
| red         | 6220  | LEE_LIVER_CANCER_E2F1_DN                      | 5  | 46  | 16207 | 524  | 3.371432 | 0.015783 |
| blue        | 5031  | RHEIN_ALL_GLUCOCORTICOID_THERAPY_DN           | 82 | 358 | 15895 | 2978 | 1.250085 | 0.015787 |
| turquoise   | 8895  | GSE17721_CTRL_VS_CPG_24H_BMDM_DN              | 58 | 175 | 16078 | 4169 | 1.292086 | 0.015794 |
| salmon      | 3740  | MODULE_279                                    | 4  | 123 | 16130 | 127  | 4.161833 | 0.015816 |
| brown       | 5154  | HAHTOLA_MYCOSIS_FUNGOIDES_CD4_UP              | 15 | 62  | 16191 | 2190 | 1.795515 | 0.015816 |
| brown       | 6951  | LIN_MELANOMA_COPY_NUMBER_UP                   | 15 | 62  | 16191 | 2190 | 1.795515 | 0.015816 |
| blue        | 584   | ADAPTIVE_IMMUNE_RESPONSE_GO_0002460           | 9  | 23  | 16230 | 2978 | 2.135618 | 0.015819 |
| greenyello  | 576   | ANION_TRANSPORT                               | 2  | 21  | 16232 | 150  | 10.31937 | 0.015839 |
| greenyello  | 3178  | chr5q21                                       | 2  | 21  | 16232 | 150  | 10.31937 | 0.015839 |
| greenyello  | 3390  | chr5q32                                       | 2  | 21  | 16232 | 150  | 10.31937 | 0.015839 |
| greenyello  | 3978  | PID_WNT_SIGNALING_PATHWAY                     | 2  | 21  | 16232 | 150  | 10.31937 | 0.015839 |
| greenyello  | 5734  | HUI_MAPK14_TARGETS_UP                         | 2  | 21  | 16232 | 150  | 10.31937 | 0.015839 |
| greenyello  | 6272  | HASLINGER_B_CLL_WITH_13Q14_DELETION           | 2  | 21  | 16232 | 150  | 10.31937 | 0.015839 |
| greenyello  | 7590  | ONO_FOXP3_TARGETS_UP                          | 2  | 21  | 16232 | 150  | 10.31937 | 0.015839 |
| green       | 2386  | MORF_ERCC4                                    | 29 | 238 | 16015 | 1305 | 1.517554 | 0.015854 |
| lightyellow | 7175  | BRUECKNER_TARGETS_OF_MIRLET7A3_UP             | 2  | 95  | 16158 | 33   | 10.36874 | 0.015868 |
| black       | 8508  | GSE12845_IGD_POS_BLOOD_VS_PRE_GC_TONSIL_BCEI  | 8  | 185 | 16068 | 283  | 2.483507 | 0.015904 |
| black       | 9320  | GSE22886_NAIVE_CD4_TCELL_VS_NKCELL_UP         | 8  | 185 | 16068 | 283  | 2.483507 | 0.015904 |
| turquoise   | 1480  | V\$E2F_02                                     | 71 | 220 | 16033 | 4169 | 1.258164 | 0.015923 |
| pink        | 725   | TRANSPORT                                     | 17 | 682 | 15571 | 228  | 1.776901 | 0.015928 |
| pink        | 34    | INTERMEDIATE_FILAMENT_CYTOSKELETON            | 2  | 14  | 16239 | 228  | 10.18358 | 0.015956 |
| pink        | 125   | INTERMEDIATE_FILAMENT                         | 2  | 14  | 16239 | 228  | 10.18358 | 0.015956 |
| pink        | 673   | RESPONSE_TO_TEMPERATURE_STIMULUS              | 2  | 14  | 16239 | 228  | 10.18358 | 0.015956 |
| pink        | 869   | PIGMENT_BIOSYNTHETIC_PROCESS                  | 2  | 14  | 16239 | 228  | 10.18358 | 0.015956 |
| pink        | 5378  | MARKS_ACETYLATED_NON_HISTONE_PROTEINS         | 2  | 14  | 16239 | 228  | 10.18358 | 0.015956 |
| pink        | 7343  | RAY_TARGETS_OF_P210_BCR_ABL_FUSION_UP         | 2  | 14  | 16239 | 228  | 10.18358 | 0.015956 |
| turquoise   | 7643  | FOURNIER_ACINAR_DEVELOPMENT_LATE_2            | 85 | 269 | 15984 | 4169 | 1.23188  | 0.015959 |
| green       | 10283 | GSE9988_LPS_VS_CTRL_TREATED_MONOCYTE_DN       | 25 | 198 | 16055 | 1305 | 1.572526 | 0.015961 |
| turquoise   | 301   | REGULATION_OF_KINASE_ACTIVITY                 | 48 | 141 | 16112 | 4169 | 1.327161 | 0.015969 |
| turquoise   | 7824  | WHITFIELD_CELL_CYCLE_M_G1                     | 48 | 141 | 16112 | 4169 | 1.327161 | 0.015969 |
| green       | 5262  | LANDIS_ERBB2_BREAST_TUMORS_324_DN             | 18 | 130 | 16123 | 1305 | 1.724456 | 0.015989 |
| magenta     | 1356  | HORMONE_ACTIVITY                              | 2  | 19  | 16234 | 167  | 10.24456 | 0.016002 |
| magenta     | 6808  | CLASPER_LYMPHATIC_VESSELS_DURING_METASTASIS_  | 2  | 19  | 16234 | 167  | 10.24456 | 0.016002 |
| red         | 8222  | MTOR_UP.V1_UP                                 | 10 | 141 | 16112 | 524  | 2.1998   | 0.016014 |
| pink        | 949   | NUCLEOTIDE_METABOLIC_PROCESS                  | 3  | 38  | 16215 | 228  | 5.62777  | 0.016019 |
| pink        | 5938  | AMIT_EGF_RESPONSE_480_MCF10A                  | 3  | 38  | 16215 | 228  | 5.62777  | 0.016019 |
| pink        | 6529  | ULE_SPLICING_VIA_NOVA2                        | 3  | 38  | 16215 | 228  | 5.62777  | 0.016019 |
| greenyello  | 8326  | IL15_UP.V1_UP                                 | 5  | 159 | 16094 | 150  | 3.407338 | 0.016023 |
| turquoise   | 1586  | V\$USF_Q6                                     | 75 | 234 | 16019 | 4169 | 1.249531 | 0.016025 |
| lightgreen  | 1740  | V\$FOXO4_02                                   | 3  | 206 | 16047 | 42   | 5.635576 | 0.016027 |
| blue        | 1628  | V\$NGFIC_01                                   | 54 | 223 | 16030 | 2978 | 1.321593 | 0.016028 |
| magenta     | 8241  | RELA_DN.V1_DN                                 | 4  | 94  | 16159 | 167  | 4.141419 | 0.016039 |

|             |                                                   |     |      |       |      |          |          |
|-------------|---------------------------------------------------|-----|------|-------|------|----------|----------|
| pink        | 4830 BERTUCCI_MEDULLARY_VS_DUCTAL_BREAST_CANCER_  | 6   | 144  | 16109 | 228  | 2.970212 | 0.016047 |
| pink        | 6320 PETROVA_ENDOTHELIUM_LYMPHATIC_VS_BLOOD_DN    | 6   | 144  | 16109 | 228  | 2.970212 | 0.016047 |
| brown       | 6626 MCLACHLAN_DENTAL_CARIES_DN                   | 41  | 218  | 16035 | 2190 | 1.395779 | 0.016047 |
| brown       | 4731 REACTOME_IMMUNE_SYSTEM                       | 129 | 801  | 15452 | 2190 | 1.195217 | 0.016058 |
| salmon      | 8921 GSE17721_LPS_VS_POLYIC_6H_BMDM_DN            | 5   | 188  | 16065 | 127  | 3.403627 | 0.016071 |
| purple      | 4670 REACTOME_MEIOTIC_RECOMBINATION               | 3   | 55   | 16198 | 157  | 5.646671 | 0.016079 |
| brown       | 8397 KAECH_DAY15_EFF_VS_MEMORY_CD8_TCELL_DN       | 37  | 193  | 16060 | 2190 | 1.422767 | 0.016082 |
| brown       | 8606 GSE13738_TCR_VS_BYSTANDER_ACTIVATED_CD4_TCEI | 37  | 193  | 16060 | 2190 | 1.422767 | 0.016082 |
| brown       | 8975 GSE17721_CPG_VS_GARDIQUIMOD_6H_BMDM_DN       | 37  | 193  | 16060 | 2190 | 1.422767 | 0.016082 |
| brown       | 9664 GSE29618_PDC_VS_MDC_UP                       | 37  | 193  | 16060 | 2190 | 1.422767 | 0.016082 |
| brown       | 9802 GSE360_CTRL_VS_M_TUBERCULOSIS_DC_UP          | 37  | 193  | 16060 | 2190 | 1.422767 | 0.016082 |
| turquoise   | 3189 chr1p31                                      | 24  | 62   | 16191 | 4169 | 1.509111 | 0.016086 |
| turquoise   | 3370 chr3q13                                      | 24  | 62   | 16191 | 4169 | 1.509111 | 0.016086 |
| turquoise   | 6301 ZHAN_MULTIPLE_MYELOMA_UP                     | 24  | 62   | 16191 | 4169 | 1.509111 | 0.016086 |
| pink        | 9755 GSE32423_IL7_VS_IL7_IL4_MEMORY_CD8_TCELL_DN  | 7   | 186  | 16067 | 228  | 2.682772 | 0.016095 |
| yellow      | 2561 GCM_TPT1                                     | 12  | 69   | 16184 | 1426 | 1.982194 | 0.016098 |
| magenta     | 9631 GSE29614_CTRL_VS_TIV_FLU_VACCINE_PBMC_2007_D | 5   | 143  | 16110 | 167  | 3.402914 | 0.016102 |
| cyan        | 3247 chr12p12                                     | 2   | 41   | 16212 | 77   | 10.29648 | 0.016122 |
| greenyello  | 136 INTEGRAL_TO_PLASMA_MEMBRANE                   | 13  | 721  | 15532 | 150  | 1.953666 | 0.016127 |
| lightyellow | 883 ENDOTHELIAL_CELL_MIGRATION                    | 1   | 8    | 16245 | 33   | 61.56439 | 0.016132 |
| lightyellow | 3594 MODULE_106                                   | 1   | 8    | 16245 | 33   | 61.56439 | 0.016132 |
| lightyellow | 5053 TONKS_TARGETS_OF_RUNX1_RUNX1T1_FUSION_SUST.  | 1   | 8    | 16245 | 33   | 61.56439 | 0.016132 |
| lightyellow | 8036 SCHMIDT_POR_TARGETS_IN_LIMB_BUD_DN           | 1   | 8    | 16245 | 33   | 61.56439 | 0.016132 |
| grey60      | 3863 MODULE_454                                   | 1   | 6    | 16247 | 44   | 61.56439 | 0.016136 |
| grey60      | 6473 INGRAM_SHH_TARGETS                           | 1   | 6    | 16247 | 44   | 61.56439 | 0.016136 |
| green       | 3625 MODULE_137                                   | 47  | 426  | 15827 | 1305 | 1.374078 | 0.016137 |
| salmon      | 7737 YAO_TEMPORAL_RESPONSE_TO_PROGESTERONE_CLU!   | 3   | 68   | 16185 | 127  | 5.646017 | 0.016148 |
| salmon      | 3761 MODULE_306                                   | 2   | 25   | 16228 | 127  | 10.23811 | 0.01616  |
| salmon      | 4305 REACTOME_REGULATORY_RNA_PATHWAYS             | 2   | 25   | 16228 | 127  | 10.23811 | 0.01616  |
| salmon      | 5688 YANG_BREAST_CANCER_ESR1_BULK_UP              | 2   | 25   | 16228 | 127  | 10.23811 | 0.01616  |
| red         | 5047 TONKS_TARGETS_OF_RUNX1_RUNX1T1_FUSION_GRAN   | 3   | 17   | 16236 | 524  | 5.473619 | 0.016177 |
| red         | 5408 MAHADEVAN_RESPONSE_TO_MP470_DN               | 3   | 17   | 16236 | 524  | 5.473619 | 0.016177 |
| red         | 6450 NIELSEN_MALIGNANT_FIBROUS_HISTIOCYTOMA_UP    | 3   | 17   | 16236 | 524  | 5.473619 | 0.016177 |
| red         | 7519 BOYALT_LIVER_CANCER_SUBCLASS_G56_DN          | 3   | 17   | 16236 | 524  | 5.473619 | 0.016177 |
| red         | 7750 MOOTHA_GLYCOGEN_METABOLISM                   | 3   | 17   | 16236 | 524  | 5.473619 | 0.016177 |
| lightcyan   | 5057 PAPASPYRIDONOS_UNSTABLE_ATEROSCLEROTIC_PLAQ  | 2   | 51   | 16202 | 62   | 10.2802  | 0.016191 |
| lightcyan   | 6475 SESTO_RESPONSE_TO_UV_C2                      | 2   | 51   | 16202 | 62   | 10.2802  | 0.016191 |
| brown       | 3285 chr10q22                                     | 18  | 79   | 16174 | 2190 | 1.690966 | 0.01622  |
| brown       | 4054 PID_CMYB_PATHWAY                             | 18  | 79   | 16174 | 2190 | 1.690966 | 0.01622  |
| magenta     | 8386 KAECH_NAIVE_VS_DAY8_EFF_CD8_TCELL_UP         | 6   | 197  | 16056 | 167  | 2.964163 | 0.016222 |
| magenta     | 10151 GSE7460_TCONV_VS_TREG_LN_DN                 | 6   | 197  | 16056 | 167  | 2.964163 | 0.016222 |
| grey60      | 6847 LEIN_PONS_MARKERS                            | 2   | 72   | 16181 | 44   | 10.26073 | 0.016238 |
| brown       | 563 CELLULAR_CARBOHYDRATE_METABOLIC_PROCESS       | 23  | 108  | 16145 | 2190 | 1.580496 | 0.016239 |
| turquoise   | 9011 GSE17721_POLYIC_VS_CPG_6H_BMDM_DN            | 62  | 189  | 16064 | 4169 | 1.278885 | 0.016245 |
| turquoise   | 9028 GSE17721_PAM3CSK4_VS_GADIQUIMOD_6H_BMDM_     | 62  | 189  | 16064 | 4169 | 1.278885 | 0.016245 |
| blue        | 9599 GSE27786_NKCELL_VS_NKTCELL_DN                | 44  | 176  | 16077 | 2978 | 1.364422 | 0.016251 |
| brown       | 6173 FLECHNER_PBL_KIDNEY_TRANSPLANT_OK_VS_DONOR_  | 30  | 150  | 16103 | 2190 | 1.484292 | 0.016255 |
| brown       | 8697 GSE1460_DP_THYMOCYTE_VS_NAIVE_CD4_TCELL_COR  | 30  | 150  | 16103 | 2190 | 1.484292 | 0.016255 |
| black       | 3796 MODULE_350                                   | 4   | 56   | 16197 | 283  | 4.102221 | 0.016273 |
| magenta     | 3185 chr18q21                                     | 3   | 52   | 16201 | 167  | 5.614809 | 0.016298 |
| magenta     | 5700 HOWLIN_PUBERTAL_MAMMARY_GLAND                | 3   | 52   | 16201 | 167  | 5.614809 | 0.016298 |
| magenta     | 8359 CORDENONSI_YAP_CONSERVED_SIGNATURE           | 3   | 52   | 16201 | 167  | 5.614809 | 0.016298 |
| yellow      | 7741 YAO_TEMPORAL_RESPONSE_TO_PROGESTERONE_CLU!   | 20  | 137  | 16116 | 1426 | 1.663886 | 0.0163   |
| red         | 10070 GSE3982_BCELL_VS_TH2_UP                     | 12  | 184  | 16069 | 524  | 2.022859 | 0.016311 |
| purple      | 2274 CCCNNGGAR_V\$OLF1_01                         | 7   | 271  | 15982 | 157  | 2.674008 | 0.016313 |
| turquoise   | 9925 GSE37416_CTRL_VS_3H_F_TULARENSIS_LVS_NEUTROP | 55  | 165  | 16088 | 4169 | 1.299512 | 0.016341 |
| red         | 1998 ATGTTAA,MIR-302C                             | 13  | 206  | 16047 | 524  | 1.957395 | 0.01635  |
| midnightb   | 5176 ENK_UV_RESPONSE_KERATINOCYTE_DN              | 6   | 468  | 15785 | 71   | 2.934814 | 0.016351 |
| grey60      | 10072 GSE3982_BASOPHIL_VS_EFF_MEMORY_CD4_TCELL_UP | 3   | 198  | 16055 | 44   | 5.596763 | 0.016352 |
| greenyello  | 1461 AACTTT_UNKNOWN                               | 22  | 1473 | 14780 | 150  | 1.618312 | 0.016352 |

|            |                                                   |    |     |       |      |          |          |
|------------|---------------------------------------------------|----|-----|-------|------|----------|----------|
| yellow     | 1878 V\$YY1_Q6                                    | 30 | 228 | 16025 | 1426 | 1.499686 | 0.016359 |
| brown      | 8723 GSE14769_UNSTIM_VS_120MIN_LPS_BMDM_DN        | 36 | 187 | 16066 | 2190 | 1.42873  | 0.016359 |
| brown      | 9023 GSE17721_PAM3CSK4_VS_GADIQUIMOD_1H_BMDM_     | 36 | 187 | 16066 | 2190 | 1.42873  | 0.016359 |
| brown      | 9144 GSE17721_0.5H_VS_24H_GARDIQUIMOD_BMDM_UP     | 36 | 187 | 16066 | 2190 | 1.42873  | 0.016359 |
| brown      | 9728 GSE30962_ACUTE_VS_CHRONIC_LCMV_SECONDARY_II  | 36 | 187 | 16066 | 2190 | 1.42873  | 0.016359 |
| blue       | 3365 chr17q21                                     | 55 | 228 | 16025 | 2978 | 1.316548 | 0.016363 |
| black      | 9479 GSE26669_CTRL_VS_COSTIM_BLOCK_MLR_CD4_TCELL_ | 8  | 186 | 16067 | 283  | 2.470155 | 0.016377 |
| black      | 9755 GSE32423_IL7_VS_IL7_IL4_MEMORY_CD8_TCELL_DN  | 8  | 186 | 16067 | 283  | 2.470155 | 0.016377 |
| black      | 5503 SCHLOSSER_MYC_AND_SERUM_RESPONSE_SYNERGY     | 3  | 31  | 16222 | 283  | 5.557848 | 0.016383 |
| brown      | 2270 GGGNNTTCC_V\$NFKB_Q6_01                      | 24 | 114 | 16139 | 2190 | 1.562413 | 0.016389 |
| brown      | 5851 RICKMAN_TUMOR_DIFFERENTIATED_MODERATELY_VS   | 24 | 114 | 16139 | 2190 | 1.562413 | 0.016389 |
| salmon     | 9028 GSE17721_PAM3CSK4_VS_GADIQUIMOD_6H_BMDM_     | 5  | 189 | 16064 | 127  | 3.385618 | 0.016408 |
| salmon     | 9040 GSE17721_LPS_VS_CPG_1H_BMDM_UP               | 5  | 189 | 16064 | 127  | 3.385618 | 0.016408 |
| salmon     | 9814 GSE360_CTRL_VS_M_TUBERCULOSIS_MAC_UP         | 5  | 189 | 16064 | 127  | 3.385618 | 0.016408 |
| red        | 6930 STEARMAN_LUNG_CANCER_EARLY_VS_LATE_UP        | 9  | 121 | 16132 | 524  | 2.307063 | 0.016411 |
| cyan       | 368 TRANSCRIPTION_DNA_DEPENDENT                   | 7  | 558 | 15695 | 77   | 2.647931 | 0.016415 |
| turquoise  | 6989 FUJII_YBX1_TARGETS_DN                        | 64 | 196 | 16057 | 4169 | 1.272992 | 0.016418 |
| turquoise  | 8480 GSE11924_TFH_VS_TH1_CD4_TCELL_UP             | 64 | 196 | 16057 | 4169 | 1.272992 | 0.016418 |
| turquoise  | 8870 GSE17721_CTRL_VS_PAM3CSK4_4H_BMDM_UP         | 64 | 196 | 16057 | 4169 | 1.272992 | 0.016418 |
| turquoise  | 9594 GSE27786_CD8_TCELL_VS_NEUTROPHIL_UP          | 64 | 196 | 16057 | 4169 | 1.272992 | 0.016418 |
| turquoise  | 9596 GSE27786_CD8_TCELL_VS_MONO_MAC_UP            | 64 | 196 | 16057 | 4169 | 1.272992 | 0.016418 |
| turquoise  | 9606 GSE27786_NKTCELL_VS_ERYTHROBLAST_UP          | 64 | 196 | 16057 | 4169 | 1.272992 | 0.016418 |
| greenyello | 2406 MORF_IL9                                     | 3  | 58  | 16195 | 150  | 5.604483 | 0.016421 |
| greenyello | 4464 REACTOME_CLASS_B_2_SECRETIN_FAMILY_RECEPTOR: | 3  | 58  | 16195 | 150  | 5.604483 | 0.016421 |
| green      | 1288 3_5_EXONUCLEASE_ACTIVITY                     | 4  | 13  | 16240 | 1305 | 3.832125 | 0.016426 |
| green      | 5571 KORKOLA_EMBRYONAL_CARCINOMA                  | 4  | 13  | 16240 | 1305 | 3.832125 | 0.016426 |
| green      | 5823 GOUYER_TATI_TARGETS_DN                       | 4  | 13  | 16240 | 1305 | 3.832125 | 0.016426 |
| green      | 6505 MACLACHLAN_BRCA1_TARGETS_DN                  | 4  | 13  | 16240 | 1305 | 3.832125 | 0.016426 |
| green      | 8099 LIU_IL13_PRIMING_MODEL                       | 4  | 13  | 16240 | 1305 | 3.832125 | 0.016426 |
| turquoise  | 1226 SPECIFIC_TRANSCRIPTIONAL_REPRESSOR_ACTIVITY  | 7  | 12  | 16241 | 4169 | 2.274146 | 0.016428 |
| turquoise  | 4165 REACTOME_TETRAHYDROBIOPTERIN_BH4_SYNTHESIS_  | 7  | 12  | 16241 | 4169 | 2.274146 | 0.016428 |
| turquoise  | 4996 GARGALOVIC_RESPONSE_TO_OXIDIZED_PHOSPHOLIPID | 7  | 12  | 16241 | 4169 | 2.274146 | 0.016428 |
| turquoise  | 6138 CHEOK_RESPONSE_TO_MERCAPTOPYRIMIDINE_UP      | 7  | 12  | 16241 | 4169 | 2.274146 | 0.016428 |
| tan        | 4327 REACTOME_RNA_POL_I_TRANSCRIPTION             | 3  | 60  | 16193 | 145  | 5.604483 | 0.016432 |
| turquoise  | 7938 BRUINS_UVC_RESPONSE_EARLY_LATE               | 92 | 294 | 15959 | 4169 | 1.21995  | 0.016444 |
| lightgreen | 2221 YGTCCTTGR_UNKNOWN                            | 2  | 76  | 16177 | 42   | 10.18358 | 0.016465 |
| lightgreen | 6591 ZHU_CMV_24_HR_DN                             | 2  | 76  | 16177 | 42   | 10.18358 | 0.016465 |
| lightgreen | 7360 ROSS_LEUKEMIA_WITH_MLL_FUSIONS               | 2  | 76  | 16177 | 42   | 10.18358 | 0.016465 |
| yellow     | 9496 GSE26928_CENTR_MEMORY_VS_CXCR5_POS_CD4_TCE   | 21 | 146 | 16107 | 1426 | 1.639383 | 0.016469 |
| purple     | 5312 MCBRYAN_PUBERTAL_TGFB1_TARGETS_UP            | 5  | 153 | 16100 | 157  | 3.383081 | 0.016477 |
| purple     | 6855 GAVIN_FOXP3_TARGETS_CLUSTER_P3               | 5  | 153 | 16100 | 157  | 3.383081 | 0.016477 |
| cyan       | 462 I_KAPPAB_KINASE_NF_KAPPAB_CASCADE             | 3  | 113 | 16140 | 77   | 5.603839 | 0.016495 |
| cyan       | 2843 KEGG_JAK_STAT_SIGNALING_PATHWAY              | 3  | 113 | 16140 | 77   | 5.603839 | 0.016495 |
| cyan       | 6315 GERY_CEBP_TARGETS                            | 3  | 113 | 16140 | 77   | 5.603839 | 0.016495 |
| brown      | 1596 V\$SP1_Q6                                    | 43 | 231 | 16022 | 2190 | 1.381484 | 0.016501 |
| midnightb  | 8134 ABRAMSON_INTERACT_WITH_AIRE                  | 2  | 45  | 16208 | 71   | 10.17402 | 0.016503 |
| red        | 4863 IGARASHI_ATF4_TARGETS_DN                     | 7  | 82  | 16171 | 524  | 2.647808 | 0.016519 |
| red        | 6249 GALINDO_IMMUNE_RESPONSE_TO_ENTEROTOXIN       | 7  | 82  | 16171 | 524  | 2.647808 | 0.016519 |
| red        | 6336 NGUYEN_NOTCH1_TARGETS_DN                     | 7  | 82  | 16171 | 524  | 2.647808 | 0.016519 |
| pink       | 9482 GSE26669_CD4_VS_CD8_TCELL_IN_MLR_UP          | 7  | 187 | 16066 | 228  | 2.668426 | 0.016528 |
| blue       | 6710 BACOLOD_RESISTANCE_TO_ALKYLATING_AGENTS_DN   | 17 | 55  | 16198 | 2978 | 1.686922 | 0.016539 |
| yellow     | 2731 KEGG_PYRIMIDINE_METABOLISM                   | 15 | 94  | 16159 | 1426 | 1.818768 | 0.016542 |
| pink       | 8292 ESC_V6.5_UP_LATE.V1_UP                       | 6  | 145 | 16108 | 228  | 2.949728 | 0.01655  |
| green      | 8714 GSE14769_UNSTIM_VS_20MIN_LPS_BMDM_UP         | 19 | 140 | 16113 | 1305 | 1.690241 | 0.016552 |
| turquoise  | 6742 SARTIPY_NORMAL_AT_INSULIN_RESISTANCE_DN      | 10 | 20  | 16233 | 4169 | 1.949268 | 0.016586 |
| brown      | 2921 BIOCARTA_SPPA_PATHWAY                        | 7  | 21  | 16232 | 2190 | 2.47382  | 0.016591 |
| brown      | 2951 BIOCARTA_CXCR4_PATHWAY                       | 7  | 21  | 16232 | 2190 | 2.47382  | 0.016591 |
| brown      | 2993 BIOCARTA_IGF1_PATHWAY                        | 7  | 21  | 16232 | 2190 | 2.47382  | 0.016591 |
| brown      | 3009 BIOCARTA_INSULIN_PATHWAY                     | 7  | 21  | 16232 | 2190 | 2.47382  | 0.016591 |
| brown      | 4160 REACTOME_GROWTH_HORMONE_RECEPTOR_SIGNALI     | 7  | 21  | 16232 | 2190 | 2.47382  | 0.016591 |

|            |                                                      |     |     |       |      |          |          |
|------------|------------------------------------------------------|-----|-----|-------|------|----------|----------|
| brown      | 6605 MARIADASON_RESPONSE_TO_BUTYRATE_SULINDAC_4      | 7   | 21  | 16232 | 2190 | 2.47382  | 0.016591 |
| magenta    | 77 GOLGI_APPARATUS_PART                              | 4   | 95  | 16158 | 167  | 4.097825 | 0.016613 |
| magenta    | 874 ION_HOMEOSTASIS                                  | 4   | 95  | 16158 | 167  | 4.097825 | 0.016613 |
| salmon     | 7850 KIM_ALL_DISORDERS_CALB1_CORR_UP                 | 9   | 500 | 15753 | 127  | 2.303575 | 0.01662  |
| brown      | 8909 GSE17721_CTRL_VS_GARDIQUIMOD_12H_BMDM_DN        | 35  | 181 | 16072 | 2190 | 1.435089 | 0.016627 |
| midnightb  | 5338 DARWICHE_SQUAMOUS_CELL_CARCINOMA_UP             | 3   | 123 | 16130 | 71   | 5.583305 | 0.016642 |
| turquoise  | 4576 REACTOME_RNA_POL_II_PRE_TRANSCRIPTION_EVENT     | 23  | 59  | 16194 | 4169 | 1.519769 | 0.016651 |
| blue       | 2813 KEGG_UBIQUITIN_MEDIATED_PROTEOLYSIS             | 34  | 130 | 16123 | 2978 | 1.427396 | 0.016664 |
| grey60     | 6333 KANG_IMMORTALIZED_BY_TERT_DN                    | 2   | 73  | 16180 | 44   | 10.12017 | 0.016667 |
| green      | 79 PORE_COMPLEX                                      | 7   | 34  | 16219 | 1305 | 2.564142 | 0.016668 |
| red        | 4807 PICCALUGA_ANGIOIMMUNOBLASTIC_LYMPHOMA_UP        | 11  | 163 | 16090 | 524  | 2.093184 | 0.016671 |
| blue       | 6855 GAVIN_FOXP3_TARGETS_CLUSTER_P3                  | 39  | 153 | 16100 | 2978 | 1.391176 | 0.016668 |
| greenyello | 3519 MODULE_27                                       | 7   | 285 | 15968 | 150  | 2.66131  | 0.016681 |
| brown      | 1965 CACTGTG,MIR-128A,MIR-128B                       | 53  | 295 | 15958 | 2190 | 1.333347 | 0.016684 |
| turquoise  | 7079 BONOME_OVARIAN_CANCER_SURVIVAL_SUBOPTIMAL       | 137 | 455 | 15798 | 4169 | 1.173845 | 0.016703 |
| cyan       | 510 RNA_BIOSYNTHETIC_PROCESS                         | 7   | 560 | 15693 | 77   | 2.638474 | 0.016709 |
| brown      | 7237 WANG_TUMOR_INVASIVENESS_DN                      | 39  | 206 | 16047 | 2190 | 1.405034 | 0.016714 |
| green      | 1815 V\$ATF1_Q6                                      | 23  | 179 | 16074 | 1305 | 1.600287 | 0.016719 |
| salmon     | 8668 GSE1432_6H_VS_24H_IFNG_MICROGLIA_UP             | 5   | 190 | 16063 | 127  | 3.367799 | 0.016749 |
| salmon     | 8680 GSE1448_CTRL_VS_ANTI_VBETA5_DP_THYMOCYTE_UP     | 5   | 190 | 16063 | 127  | 3.367799 | 0.016749 |
| greenyello | 1886 V\$CREB_Q3                                      | 6   | 221 | 16032 | 150  | 2.941719 | 0.01676  |
| blue       | 1953 CACTGCC,MIR-34A,MIR-34C,MIR-449                 | 61  | 257 | 15996 | 2978 | 1.295405 | 0.016779 |
| blue       | 119 SPINDLE_MICROTUBULE                              | 7   | 16  | 16237 | 2978 | 2.387739 | 0.016781 |
| blue       | 6036 ONDER_CDH1_TARGETS_3_UP                         | 7   | 16  | 16237 | 2978 | 2.387739 | 0.016781 |
| yellow     | 5289 ROYLANCE_BREAST_CANCER_16Q_COPY_NUMBER_DN       | 5   | 18  | 16235 | 1426 | 3.166004 | 0.016787 |
| salmon     | 6772 KYNG_RESPONSE_TO_H2O2                           | 3   | 69  | 16184 | 127  | 5.56419  | 0.016788 |
| turquoise  | 3551 MODULE_62                                       | 32  | 88  | 16165 | 4169 | 1.41765  | 0.016789 |
| lightcyan  | 5313 MCBRYAN_PUBERTAL_TGFB1_TARGETS_DN               | 2   | 52  | 16201 | 62   | 10.08251 | 0.016798 |
| pink       | 687 RESPONSE_TO_ABIOTIC_STIMULUS                     | 4   | 70  | 16183 | 228  | 4.073434 | 0.016815 |
| turquoise  | 3525 MODULE_36                                       | 52  | 155 | 16098 | 4169 | 1.307896 | 0.016856 |
| turquoise  | 5504 SCHLOSSER_MYC_TARGETS_REPRESSED_BY_SERUM        | 52  | 155 | 16098 | 4169 | 1.307896 | 0.016856 |
| black      | 10111 GSE39820_CTRL_VS_TGFBETA3_IL6_IL23A_CD4_TCELL_ | 8   | 187 | 16066 | 283  | 2.456945 | 0.01686  |
| red        | 5940 AMIT_SERUM_RESPONSE_40_MCF10A                   | 4   | 31  | 16222 | 524  | 4.002216 | 0.016861 |
| turquoise  | 6820 CREIGHTON_ENDOCRINE_THERAPY_RESISTANCE_3        | 189 | 644 | 15609 | 4169 | 1.144136 | 0.016861 |
| lightgreen | 2132 AACTGGA,MIR-145                                 | 3   | 210 | 16043 | 42   | 5.528231 | 0.016864 |
| red        | 2209 WGTNNNNNAAA_UNKNOWN                             | 23  | 442 | 15811 | 524  | 1.614016 | 0.016868 |
| purple     | 3217 chr7q31                                         | 3   | 56  | 16197 | 157  | 5.545837 | 0.016871 |
| purple     | 5290 JOHANSSON_GLIOMAGENESIS_BY_PDGF_UP              | 3   | 56  | 16197 | 157  | 5.545837 | 0.016871 |
| purple     | 6846 LEIN_MIDBRAIN_MARKERS                           | 3   | 56  | 16197 | 157  | 5.545837 | 0.016871 |
| purple     | 7612 FONTAINE_PAPILLARY_THYROID_CARCINOMA_UP         | 3   | 56  | 16197 | 157  | 5.545837 | 0.016871 |
| purple     | 7708 NAKAYAMA_SOFT_TISSUE_TUMORS_PCA2_DN             | 3   | 56  | 16197 | 157  | 5.545837 | 0.016871 |
| cyan       | 5054 TONKS_TARGETS_OF_RUNX1_RUNX1T1_FUSION_SUST.     | 2   | 42  | 16211 | 77   | 10.05133 | 0.016877 |
| cyan       | 6067 SHIPP_DLBCL_CURED_VS_FATAL_DN                   | 2   | 42  | 16211 | 77   | 10.05133 | 0.016877 |
| cyan       | 7319 NUTT_GBM_VS_AO_GLIOMA_UP                        | 2   | 42  | 16211 | 77   | 10.05133 | 0.016877 |
| lightgreen | 6287 HESS_TARGETS_OF_HOXA9_AND_MEIS1_DN              | 2   | 77  | 16176 | 42   | 10.05133 | 0.016877 |
| lightgreen | 6969 WALLACE_PROSTATE_CANCER_RACE_DN                 | 2   | 77  | 16176 | 42   | 10.05133 | 0.016877 |
| brown      | 10048 GSE3982_NEUTROPHIL_VS_BASOPHIL_UP              | 34  | 175 | 16078 | 2190 | 1.441884 | 0.016884 |
| blue       | 2369 MORF_CSNK2B                                     | 67  | 286 | 15967 | 2978 | 1.27855  | 0.016895 |
| purple     | 8352 KRAS.DF.V1_DN                                   | 5   | 154 | 16099 | 157  | 3.361113 | 0.016902 |
| purple     | 8355 TBK1.DF_UP                                      | 7   | 273 | 15980 | 157  | 2.654418 | 0.016915 |
| red        | 8925 GSE17721_LPS_VS_POLYIC_12H_BMDM_DN              | 12  | 185 | 16068 | 524  | 2.011925 | 0.016952 |
| red        | 8938 GSE17721_POLYIC_VS_PAM3CSK4_6H_BMDM_UP          | 12  | 185 | 16068 | 524  | 2.011925 | 0.016952 |
| red        | 10178 GSE7460_WT_VS_FOXP3_HET_ACT_TCONV_UP           | 12  | 185 | 16068 | 524  | 2.011925 | 0.016952 |
| lightcyan  | 9352 GSE22886_NEUTROPHIL_VS_DC_UP                    | 3   | 142 | 16111 | 62   | 5.538278 | 0.016968 |
| pink       | 4478 REACTOME_SLC_MEDIATED_TRANSMEMBRANE_TRAN        | 7   | 188 | 16065 | 228  | 2.654232 | 0.016969 |
| tan        | 8021 PURBEY_TARGETS_OF_CTBP1_NOT_SATB1_UP            | 7   | 296 | 15957 | 145  | 2.650769 | 0.016994 |
| yellow     | 100 MITOCHONDRIAL_MATRIX                             | 9   | 46  | 16207 | 1426 | 2.229968 | 0.016994 |
| yellow     | 113 MITOCHONDRIAL_LUMEN                              | 9   | 46  | 16207 | 1426 | 2.229968 | 0.016994 |
| yellow     | 2564 GCM_VAV1                                        | 9   | 46  | 16207 | 1426 | 2.229968 | 0.016994 |
| tan        | 8588 GSE13485_DAY3_VS_DAY7_YF17D_VACCINE_PBMC_UI     | 5   | 167 | 16086 | 145  | 3.355978 | 0.017    |

|            |                                                   |    |     |       |      |          |          |
|------------|---------------------------------------------------|----|-----|-------|------|----------|----------|
| tan        | 9830 GSE360_L_DONOVANI_VS_L_MAJOR_DC_UP           | 5  | 167 | 16086 | 145  | 3.355978 | 0.017    |
| blue       | 1894 V\$PAX_Q6                                    | 49 | 200 | 16053 | 2978 | 1.337134 | 0.017031 |
| blue       | 9388 GSE22886_CTRL_VS_LPS_24H_DC_UP               | 49 | 200 | 16053 | 2978 | 1.337134 | 0.017031 |
| blue       | 2604 GNF2_SMC1L1                                  | 10 | 27  | 16226 | 2978 | 2.021367 | 0.017034 |
| blue       | 3043 BIOCARTA_MYOSIN_PATHWAY                      | 10 | 27  | 16226 | 2978 | 2.021367 | 0.017034 |
| blue       | 3799 MODULE_355                                   | 10 | 27  | 16226 | 2978 | 2.021367 | 0.017034 |
| blue       | 4696 REACTOME_NEP_NS2_INTERACTS_WITH_THE_CELLULA  | 10 | 27  | 16226 | 2978 | 2.021367 | 0.017034 |
| blue       | 4698 REACTOME_TRANSPORT_OF_RIBONUCLEOPROTEINS_II  | 10 | 27  | 16226 | 2978 | 2.021367 | 0.017034 |
| brown      | 474 REGULATION_OF_SIGNAL_TRANSDUCTION             | 38 | 200 | 16053 | 2190 | 1.410078 | 0.017044 |
| blue       | 4072 PID_CASPASE_PATHWAY                          | 16 | 51  | 16202 | 2978 | 1.712216 | 0.017073 |
| lightgreen | 5222 GRAESSMANN_APOPTOSIS_BY_SERUM_DEPRIVATION_   | 3  | 211 | 16042 | 42   | 5.502031 | 0.017077 |
| salmon     | 8564 GSE13484_UNSTIM_VS_12H_YF17D_VACCINE_STIM_PI | 5  | 191 | 16062 | 127  | 3.350167 | 0.017094 |
| salmon     | 9504 GSE2706_UNSTIM_VS_8H_LPS_DC_UP               | 5  | 191 | 16062 | 127  | 3.350167 | 0.017094 |
| green      | 2593 GNF2_MLH1                                    | 8  | 42  | 16211 | 1305 | 2.372268 | 0.017107 |
| turquoise  | 2515 GCM_DFFA                                     | 44 | 128 | 16125 | 4169 | 1.340122 | 0.017112 |
| magenta    | 926 LYMPHOCYTE_ACTIVATION                         | 3  | 53  | 16200 | 167  | 5.508869 | 0.017148 |
| magenta    | 5941 AMIT_SERUM_RESPONSE_60_MCF10A                | 3  | 53  | 16200 | 167  | 5.508869 | 0.017148 |
| purple     | 8363 KRAS.300_UP.V1_UP                            | 4  | 102 | 16151 | 157  | 4.059698 | 0.017151 |
| greenyello | 3813 MODULE_375                                   | 3  | 59  | 16194 | 150  | 5.509492 | 0.017186 |
| greenyello | 4173 REACTOME_IMMUNOREGULATORY_INTERACTIONS_BE    | 3  | 59  | 16194 | 150  | 5.509492 | 0.017186 |
| turquoise  | 5193 CASTELLANO_HRAS_AND_NRAS_TARGETS_UP          | 4  | 5   | 16248 | 4169 | 3.118829 | 0.017188 |
| turquoise  | 7107 JONES_TCOF1_TARGETS                          | 4  | 5   | 16248 | 4169 | 3.118829 | 0.017188 |
| magenta    | 7549 WOO_LIVER_CANCER_RECURRENCE_UP               | 4  | 96  | 16157 | 167  | 4.05514  | 0.017201 |
| turquoise  | 2039 ATAACCT,MIR-154                              | 22 | 56  | 16197 | 4169 | 1.531568 | 0.017204 |
| midnightb  | 7735 YAO_TEMPORAL_RESPONSE_TO_PROGESTERONE_CLU!   | 2  | 46  | 16207 | 71   | 9.952848 | 0.017205 |
| red        | 260 NUCLEOBASENUCLEOSIDE_AND_NUCLEOTIDE_METABC    | 5  | 47  | 16206 | 524  | 3.2997   | 0.017208 |
| red        | 6151 LEE_LIVER_CANCER_MYC_E2F1_DN                 | 5  | 47  | 16206 | 524  | 3.2997   | 0.017208 |
| lightgreen | 4824 LIU_PROSTATE_CANCER_DN                       | 4  | 386 | 15867 | 42   | 4.010116 | 0.017228 |
| red        | 6074 BYSTRYKH_HEMATOPOIESIS_STEM_CELL_QTL_CIS     | 9  | 122 | 16131 | 524  | 2.288152 | 0.017231 |
| greenyello | 1729 V\$POU6F1_01                                 | 5  | 162 | 16091 | 150  | 3.344239 | 0.017235 |
| greenyello | 5016 TAKEDA_TARGETS_OF_NUP98_HOXA9_FUSION_16D_L   | 5  | 162 | 16091 | 150  | 3.344239 | 0.017235 |
| greenyello | 9766 GSE33513_TCF7_KO_VS_HET_EARLY_THYMIC_PROGEN  | 5  | 162 | 16091 | 150  | 3.344239 | 0.017235 |
| grey60     | 960 CATABOLIC_PROCESS                             | 3  | 202 | 16051 | 44   | 5.485936 | 0.017239 |
| purple     | 53 TIGHT_JUNCTION                                 | 2  | 21  | 16232 | 157  | 9.859266 | 0.017263 |
| purple     | 75 CYTOSOLIC_PART                                 | 2  | 21  | 16232 | 157  | 9.859266 | 0.017263 |
| purple     | 1616 V\$STAT3_01                                  | 2  | 21  | 16232 | 157  | 9.859266 | 0.017263 |
| purple     | 2921 BIOCARTA_SPPA_PATHWAY                        | 2  | 21  | 16232 | 157  | 9.859266 | 0.017263 |
| purple     | 4395 REACTOME_G_PROTEIN_ACTIVATION                | 2  | 21  | 16232 | 157  | 9.859266 | 0.017263 |
| purple     | 5118 GRAHAM_CML_QUIESCENT_VS_CML_DIVIDING_UP      | 2  | 21  | 16232 | 157  | 9.859266 | 0.017263 |
| purple     | 6024 JI_METASTASIS_REPRESSED_BY_STK11             | 2  | 21  | 16232 | 157  | 9.859266 | 0.017263 |
| purple     | 6108 IIZUKA_LIVER_CANCER_PROGRESSION_G2_G3_UP     | 2  | 21  | 16232 | 157  | 9.859266 | 0.017263 |
| purple     | 6183 CHEOK_RESPONSE_TO_HD_MTX_UP                  | 2  | 21  | 16232 | 157  | 9.859266 | 0.017263 |
| purple     | 6534 KANG_FLUOROURACIL_RESISTANCE_UP              | 2  | 21  | 16232 | 157  | 9.859266 | 0.017263 |
| purple     | 6734 BACOLOD_RESISTANCE_TO_ALKYLATING_AGENTS_UP   | 2  | 21  | 16232 | 157  | 9.859266 | 0.017263 |
| purple     | 7529 CHIANG_LIVER_CANCER_SUBCLASS_POLYSOMY7_DN    | 2  | 21  | 16232 | 157  | 9.859266 | 0.017263 |
| cyan       | 8043 SERVITJA_ISLET_HNF1A_TARGETS_UP              | 3  | 115 | 16138 | 77   | 5.506381 | 0.017278 |
| brown      | 7352 RUTELLA_RESPONSE_TO_HGF_VS_CSF2RB_AND_IL4_DI | 44 | 238 | 16015 | 2190 | 1.372035 | 0.017282 |
| turquoise  | 9049 GSE17721_LPS_VS_CPG_8H_BMDM_DN               | 63 | 193 | 16060 | 4169 | 1.272579 | 0.01729  |
| turquoise  | 9339 GSE22886_IGG_IGA_MEMORY_BCELL_VS_BLOOD_PLA!  | 63 | 193 | 16060 | 4169 | 1.272579 | 0.01729  |
| turquoise  | 9542 GSE27786_LSK_VS_NEUTROPHIL_UP                | 63 | 193 | 16060 | 4169 | 1.272579 | 0.01729  |
| lightgreen | 7150 LABBE_TGFB1_TARGETS_DN                       | 2  | 78  | 16175 | 42   | 9.922466 | 0.017293 |
| blue       | 6218 PENG_RAPAMYCIN_RESPONSE_DN                   | 58 | 243 | 16010 | 2978 | 1.302658 | 0.017303 |
| yellow     | 4437 REACTOME_3_UTR_MEDIATED_TRANSLATIONAL_REGL   | 16 | 103 | 16150 | 1426 | 1.770503 | 0.017318 |
| greenyello | 3680 MODULE_200                                   | 2  | 22  | 16231 | 150  | 9.850303 | 0.017319 |
| turquoise  | 375 REGULATION_OF_TRANSFERASE_ACTIVITY            | 49 | 145 | 16108 | 4169 | 1.317437 | 0.017323 |
| green      | 5216 MARKEY_RB1_CHRONIC_LOF_DN                    | 15 | 103 | 16150 | 1305 | 1.813748 | 0.017329 |
| purple     | 1685 V\$RSRFC4_Q2                                 | 5  | 155 | 16098 | 157  | 3.339429 | 0.017333 |
| purple     | 5886 WU_CELL_MIGRATION                            | 5  | 155 | 16098 | 157  | 3.339429 | 0.017333 |
| yellow     | 8640 GSE14308_TH1_VS_NAIVE_CD4_TCELL_UP           | 26 | 192 | 16061 | 1426 | 1.543427 | 0.017343 |
| yellow     | 9157 GSE17974_0H_VS_4H_IN_VITRO_ACT_CD4_TCELL_DN  | 26 | 192 | 16061 | 1426 | 1.543427 | 0.017343 |

|            |                                                   |    |     |       |      |          |          |
|------------|---------------------------------------------------|----|-----|-------|------|----------|----------|
| brown      | 9553 GSE27786_LIN_NEG_VS_NKCELL_DN                | 37 | 194 | 16059 | 2190 | 1.415433 | 0.017369 |
| brown      | 9900 GSE36392_MAC_VS_NEUTROPHIL_IL25_TREATED_LUN  | 37 | 194 | 16059 | 2190 | 1.415433 | 0.017369 |
| salmon     | 5896 DEN_INTERACT_WITH_LCA5                       | 2  | 26  | 16227 | 127  | 9.844337 | 0.017418 |
| purple     | 5294 MCBRYAN_PUBERTAL_BREAST_4_5WK_UP             | 6  | 213 | 16040 | 157  | 2.916121 | 0.017431 |
| purple     | 7650 HOSHIDA_LIVER_CANCER_SUBCLASS_S3             | 6  | 213 | 16040 | 157  | 2.916121 | 0.017431 |
| purple     | 7875 DUTERTRE ESTRADIOL_RESPONSE_6HR_UP           | 6  | 213 | 16040 | 157  | 2.916121 | 0.017431 |
| salmon     | 2371 MORF_CUL1                                    | 3  | 70  | 16183 | 127  | 5.484702 | 0.017441 |
| salmon     | 8463 GSE11864_UNTREATED_VS_CSF1_IFNG_IN_MAC_DN    | 5  | 192 | 16061 | 127  | 3.332718 | 0.017445 |
| salmon     | 8556 GSE13411_IGM_MEMORY_BCELL_VS_PLASMA_CELL_U   | 5  | 192 | 16061 | 127  | 3.332718 | 0.017445 |
| salmon     | 8858 GSE17721_CTRL_VS_POLYIC_8H_BMDM_UP           | 5  | 192 | 16061 | 127  | 3.332718 | 0.017445 |
| salmon     | 9697 GSE29618_PRE_VS_DAY7_POST_TIV_FLU_VACCINE_PD | 5  | 192 | 16061 | 127  | 3.332718 | 0.017445 |
| salmon     | 10059 GSE3982_NEUTROPHIL_VS_TH2_DN                | 5  | 192 | 16061 | 127  | 3.332718 | 0.017445 |
| blue       | 1917 V\$SP1_Q6_01                                 | 54 | 224 | 16029 | 2978 | 1.315693 | 0.017451 |
| grey60     | 635 IMMUNE_RESPONSE                               | 3  | 203 | 16050 | 44   | 5.458912 | 0.017465 |
| red        | 1216 ENZYME_REGULATOR_ACTIVITY                    | 16 | 276 | 15977 | 524  | 1.798097 | 0.017472 |
| greenyello | 7069 SMID_BREAST_CANCER_BASAL_DN                  | 11 | 574 | 15679 | 150  | 2.076458 | 0.017473 |
| green      | 993 CELL_MIGRATION                                | 12 | 76  | 16177 | 1305 | 1.966485 | 0.017497 |
| lightgreen | 7875 DUTERTRE ESTRADIOL_RESPONSE_6HR_UP           | 3  | 213 | 16040 | 42   | 5.450369 | 0.017507 |
| yellow     | 9775 GSE339_CD4POS_VS_CD8POS_DC_IN_CULTURE_DN     | 25 | 183 | 16070 | 1426 | 1.557051 | 0.017513 |
| turquoise  | 2659 GNF2_KPNB1                                   | 27 | 72  | 16181 | 4169 | 1.461951 | 0.017513 |
| turquoise  | 8658 GSE1432_CTRL_VS_IFNG_1H_MICROGLIA_UP         | 56 | 169 | 16084 | 4169 | 1.291823 | 0.017531 |
| lightcyan  | 7172 RAY_TUMORIGENESIS_BY_ERBB2_CDC25A_DN         | 3  | 144 | 16109 | 62   | 5.461358 | 0.017606 |
| cyan       | 7406 ZHANG_TLX_TARGETS_36HR_UP                    | 4  | 210 | 16043 | 77   | 4.020532 | 0.017608 |
| red        | 9719 GSE30083_SP2_VS_SP4_THYMOCYTE_DN             | 12 | 186 | 16067 | 524  | 2.001108 | 0.017613 |
| brown      | 1652 V\$NFY_01                                    | 40 | 213 | 16040 | 2190 | 1.393702 | 0.017622 |
| cyan       | 1075 GTP_BINDING                                  | 2  | 43  | 16210 | 77   | 9.817578 | 0.017647 |
| cyan       | 1297 GUANYL_NUCLEOTIDE_BINDING                    | 2  | 43  | 16210 | 77   | 9.817578 | 0.017647 |
| cyan       | 2654 GNF2_INPP5D                                  | 2  | 43  | 16210 | 77   | 9.817578 | 0.017647 |
| cyan       | 5751 KHETCHOUMIAN_TRIM24_TARGETS_UP               | 2  | 43  | 16210 | 77   | 9.817578 | 0.017647 |
| magenta    | 4586 REACTOME_INTERACTION_BETWEEN_L1_AND_ANKYRI   | 2  | 20  | 16233 | 167  | 9.732335 | 0.017661 |
| magenta    | 5704 HATADA METHYLATED_IN_LUNG_CANCER_DN          | 2  | 20  | 16233 | 167  | 9.732335 | 0.017661 |
| magenta    | 6250 VERNELL_RETINOBLASTOMA_PATHWAY_DN            | 2  | 20  | 16233 | 167  | 9.732335 | 0.017661 |
| magenta    | 6480 HEDENFALK_BREAST_CANCER_BRACX_UP             | 2  | 20  | 16233 | 167  | 9.732335 | 0.017661 |
| purple     | 2254 TGTTTGY_V\$HNF3_Q6                           | 11 | 549 | 15704 | 157  | 2.074217 | 0.017662 |
| blue       | 7865 WANG_RESPONSE_TO_GSK3_INHIBITOR_SB216763_DN  | 79 | 345 | 15908 | 2978 | 1.249732 | 0.017665 |
| red        | 8110 PEDRIOLI_MIR31_TARGETS_DN                    | 19 | 347 | 15906 | 524  | 1.698347 | 0.017681 |
| purple     | 6631 WEIGEL_OXIDATIVE_STRESS_BY_HNE_AND_TBH       | 3  | 57  | 16196 | 157  | 5.448542 | 0.017685 |
| brown      | 3215 chr1q21                                      | 36 | 188 | 16065 | 2190 | 1.421131 | 0.017687 |
| brown      | 6637 WELCSH_BRCA1_TARGETS_UP                      | 36 | 188 | 16065 | 2190 | 1.421131 | 0.017687 |
| brown      | 8513 GSE12845_IGD_NEG_BLOOD_VS_NAIVE_TONSIL_BCELL | 36 | 188 | 16065 | 2190 | 1.421131 | 0.017687 |
| brown      | 8701 GSE1460_DP_THYMOCYTE_VS_THYMIC_STROMAL_CEL   | 36 | 188 | 16065 | 2190 | 1.421131 | 0.017687 |
| brown      | 8921 GSE17721_LPS_VS_POLYIC_6H_BMDM_DN            | 36 | 188 | 16065 | 2190 | 1.421131 | 0.017687 |
| brown      | 9012 GSE17721_POLYIC_VS_CPG_8H_BMDM_UP            | 36 | 188 | 16065 | 2190 | 1.421131 | 0.017687 |
| brown      | 9649 GSE29617_CTRL_VS_DAY3_TIV_FLU_VACCINE_PBMC_2 | 36 | 188 | 16065 | 2190 | 1.421131 | 0.017687 |
| brown      | 9756 GSE32423_IL7_VS_IL4_MEMORY_CD8_TCELL_UP      | 36 | 188 | 16065 | 2190 | 1.421131 | 0.017687 |
| brown      | 10006 GSE3982_MAST_CELL_VS_NKCELL_UP              | 36 | 188 | 16065 | 2190 | 1.421131 | 0.017687 |
| tan        | 3947 PID_GLYPICAN_1PATHWAY                        | 2  | 23  | 16230 | 145  | 9.746927 | 0.01769  |
| brown      | 511 DETECTION_OF_STIMULUS                         | 8  | 26  | 16227 | 2190 | 2.283527 | 0.017691 |
| brown      | 4235 REACTOME_SIGNALLING_TO_RAS                   | 8  | 26  | 16227 | 2190 | 2.283527 | 0.017691 |
| turquoise  | 1707 V\$E2F1_Q6                                   | 71 | 221 | 16032 | 4169 | 1.252471 | 0.017701 |
| turquoise  | 1886 V\$CREB_Q3                                   | 71 | 221 | 16032 | 4169 | 1.252471 | 0.017701 |
| blue       | 2290 GCCATNTTG_V\$YY1_Q6                          | 91 | 404 | 15849 | 2978 | 1.229331 | 0.017709 |
| magenta    | 1196 SUBSTRATE_SPECIFIC_TRANSMEMBRANE_TRANSPORT   | 7  | 259 | 15994 | 167  | 2.630361 | 0.017713 |
| purple     | 8309 CRX_NRL_DN.V1_DN                             | 4  | 103 | 16150 | 157  | 4.020283 | 0.017713 |
| yellow     | 9056 GSE17721_POLYIC_VS_GARDIQUIMOD_0.5H_BMDM_U   | 23 | 165 | 16088 | 1426 | 1.588759 | 0.017716 |
| blue       | 8549 GSE13411_NAIVE_VS_SWITCHED_MEMORY_BCELL_DN   | 47 | 191 | 16062 | 2978 | 1.342992 | 0.01772  |
| blue       | 9073 GSE17721_POLYIC_VS_GARDIQUIMOD_24H_BMDM_D    | 47 | 191 | 16062 | 2978 | 1.342992 | 0.01772  |
| blue       | 9222 GSE18791_CTRL_VS_NEWCASTLE_VIRUS_DC_4H_UP    | 47 | 191 | 16062 | 2978 | 1.342992 | 0.01772  |
| blue       | 9560 GSE27786_LIN_NEG_VS_MONO_MAC_UP              | 47 | 191 | 16062 | 2978 | 1.342992 | 0.01772  |
| blue       | 2595 GNF2_MSH6                                    | 11 | 31  | 16222 | 2978 | 1.9366   | 0.017733 |

|            |                                                   |    |     |       |      |          |          |
|------------|---------------------------------------------------|----|-----|-------|------|----------|----------|
| magenta    | 7912 WIERENGA_STAT5A_TARGETS_UP                   | 6  | 201 | 16052 | 167  | 2.905175 | 0.017733 |
| brown      | 4129 REACTOME_APOPTOTIC_CLEAVAGE_OF_CELLULAR_PRI  | 10 | 36  | 16217 | 2190 | 2.061517 | 0.017734 |
| turquoise  | 1811 V\$TEL2_Q6                                   | 73 | 228 | 16025 | 4169 | 1.248216 | 0.017738 |
| turquoise  | 2298 MORF_BRCA1                                   | 73 | 228 | 16025 | 4169 | 1.248216 | 0.017738 |
| turquoise  | 2841 KEGG_RIG_I_LIKE_RECEPTOR_SIGNALING_PATHWAY   | 21 | 53  | 16200 | 4169 | 1.544703 | 0.017738 |
| green      | 2809 KEGG_NEUROACTIVE_LIGAND_RECEPTOR_INTERACTIO  | 19 | 141 | 16112 | 1305 | 1.678253 | 0.017739 |
| brown      | 1956 GGGYGTGNY_UNKNOWN                            | 96 | 580 | 15673 | 2190 | 1.22838  | 0.017743 |
| turquoise  | 1801 V\$NFMUE1_Q6                                 | 75 | 235 | 16018 | 4169 | 1.244214 | 0.017753 |
| green      | 3687 MODULE_207                                   | 23 | 180 | 16073 | 1305 | 1.591396 | 0.017763 |
| green      | 8729 GSE14769_20MIN_VS_360MIN_LPS_BMDM_DN         | 23 | 180 | 16073 | 1305 | 1.591396 | 0.017763 |
| purple     | 8336 TGFB_UP.V1_UP                                | 5  | 156 | 16097 | 157  | 3.318022 | 0.017772 |
| blue       | 1534 V\$MAX_01                                    | 55 | 229 | 16024 | 2978 | 1.310799 | 0.017794 |
| salmon     | 8501 GSE12366_PLASMA_CELL_VS_MEMORY_BCELL_DN      | 5  | 193 | 16060 | 127  | 3.31545  | 0.0178   |
| salmon     | 9396 GSE22886_NAIVE_CD4_TCELL_VS_48H_ACT_TH2_UP   | 5  | 193 | 16060 | 127  | 3.31545  | 0.0178   |
| salmon     | 10049 GSE3982_NEUTROPHIL_VS_BASOPHIL_DN           | 5  | 193 | 16060 | 127  | 3.31545  | 0.0178   |
| blue       | 5041 MULLIGHAN_NPM1_SIGNATURE_3_DN                | 38 | 149 | 16104 | 2978 | 1.391894 | 0.017808 |
| red        | 5600 DACOSTA_UV_RESPONSE_VIA_ERCC3_COMMON_DN      | 24 | 469 | 15784 | 524  | 1.587233 | 0.017826 |
| greenyello | 1626 CATRRAGC_UNKNOWN                             | 4  | 108 | 16145 | 150  | 4.013086 | 0.017827 |
| green      | 5948 SHEN_SMARCA2_TARGETS_DN                      | 27 | 220 | 16033 | 1305 | 1.528495 | 0.017831 |
| black      | 7014 HANN_RESISTANCE_TO_BCL2_INHIBITOR_DN         | 3  | 32  | 16221 | 283  | 5.384165 | 0.01785  |
| brown      | 510 RNA_BIOSYNTHETIC_PROCESS                      | 93 | 560 | 15693 | 2190 | 1.232493 | 0.017853 |
| blue       | 4447 REACTOME_ACTIVATION_OF_CHAPERONE_GENES_BY_   | 14 | 43  | 16210 | 2978 | 1.776922 | 0.017874 |
| pink       | 9270 GSE20366_TREG_VS_NAIVE_CD4_TCELL_DEC205_CON  | 7  | 190 | 16063 | 228  | 2.626293 | 0.017878 |
| brown      | 2118 GAGCTGG,MIR-337                              | 29 | 145 | 16108 | 2190 | 1.484292 | 0.017907 |
| brown      | 8070 HUANG_GATA2_TARGETS_UP                       | 29 | 145 | 16108 | 2190 | 1.484292 | 0.017907 |
| midnightb  | 497 MEMBRANE_LIPID_BIOSYNTHETIC_PROCESS           | 2  | 47  | 16206 | 71   | 9.741085 | 0.017919 |
| midnightb  | 3250 chr6q21                                      | 2  | 47  | 16206 | 71   | 9.741085 | 0.017919 |
| midnightb  | 6120 KENNY_CTNNB1_TARGETS_DN                      | 2  | 47  | 16206 | 71   | 9.741085 | 0.017919 |
| grey60     | 7913 WIERENGA_STAT5A_TARGETS_DN                   | 3  | 205 | 16048 | 44   | 5.405654 | 0.017922 |
| tan        | 3370 chr3q13                                      | 3  | 62  | 16191 | 145  | 5.423693 | 0.01793  |
| turquoise  | 4382 REACTOME_DARPP_32_EVENTS                     | 11 | 23  | 16230 | 4169 | 1.864518 | 0.017948 |
| turquoise  | 4589 REACTOME_TRANSPORT_OF_VITAMINS_NUCLEOSIDES   | 11 | 23  | 16230 | 4169 | 1.864518 | 0.017948 |
| turquoise  | 5376 EGUCHI_CELL_CYCLE_RB1_TARGETS                | 11 | 23  | 16230 | 4169 | 1.864518 | 0.017948 |
| lightgreen | 899 ACTIN_FILAMENT_BASED_MOVEMENT                 | 1  | 7   | 16246 | 42   | 55.28231 | 0.017953 |
| lightgreen | 1190 HORMONE_BINDING                              | 1  | 7   | 16246 | 42   | 55.28231 | 0.017953 |
| lightgreen | 7010 GAUTSCHI_SRC_SIGNALING                       | 1  | 7   | 16246 | 42   | 55.28231 | 0.017953 |
| brown      | 269 REGULATION_OF_SECRETION                       | 9  | 31  | 16222 | 2190 | 2.154618 | 0.017974 |
| brown      | 3321 chr20p11                                     | 9  | 31  | 16222 | 2190 | 2.154618 | 0.017974 |
| brown      | 3466 SIG_REGULATION_OF_THE_ACTIN_CYTOSKELETON_BY_ | 9  | 31  | 16222 | 2190 | 2.154618 | 0.017974 |
| brown      | 7338 POTTI_CYTOXAN_SENSITIVITY                    | 9  | 31  | 16222 | 2190 | 2.154618 | 0.017974 |
| brown      | 5805 LOCKWOOD_AMPLIFIED_IN_LUNG_CANCER            | 39 | 207 | 16046 | 2190 | 1.398246 | 0.017996 |
| brown      | 8674 GSE14350_IL2RB_KO_VS_WT_TREG_UP              | 35 | 182 | 16071 | 2190 | 1.427204 | 0.017998 |
| yellow     | 2466 MORF_SART1                                   | 11 | 62  | 16191 | 1426 | 2.022158 | 0.018001 |
| turquoise  | 872 CELL_CYCLE_GO_0007049                         | 92 | 295 | 15958 | 4169 | 1.215815 | 0.018003 |
| yellow     | 5449 HESSON_TUMOR_SUPPRESSOR_CLUSTER_3P21_3       | 3  | 7   | 16246 | 1426 | 4.884692 | 0.018015 |
| yellow     | 5511 FARMER_BREAST_CANCER_CLUSTER_8               | 3  | 7   | 16246 | 1426 | 4.884692 | 0.018015 |
| yellow     | 8154 HOLLEMAN_DAUNORUBICIN_ALL_UP                 | 3  | 7   | 16246 | 1426 | 4.884692 | 0.018015 |
| purple     | 5074 SENESE_HDAC3_TARGETS_DN                      | 10 | 479 | 15774 | 157  | 2.161217 | 0.018022 |
| blue       | 782 CELLULAR_MACROMOLECULE_CATABOLIC_PROCESS      | 27 | 99  | 16154 | 2978 | 1.488461 | 0.018023 |
| magenta    | 1636 V\$NRSF_01                                   | 3  | 54  | 16199 | 167  | 5.406853 | 0.018023 |
| magenta    | 5049 TONKS_TARGETS_OF_RUNX1_RUNX1T1_FUSION_MON    | 3  | 54  | 16199 | 167  | 5.406853 | 0.018023 |
| magenta    | 7661 GUTIERREZ_CHRONIC_LYMPHOCYTIC_LEUKEMIA_DN    | 3  | 54  | 16199 | 167  | 5.406853 | 0.018023 |
| turquoise  | 9681 GSE29618_PRE_VS_DAY7_FLU_VACCINE_MONOCYTE_I  | 60 | 183 | 16070 | 4169 | 1.278209 | 0.018024 |
| salmon     | 2351 MORF_AP3D1                                   | 4  | 128 | 16125 | 127  | 3.999262 | 0.018044 |
| red        | 610 RESPONSE_TO_CHEMICAL_STIMULUS                 | 15 | 254 | 15999 | 524  | 1.831723 | 0.018052 |
| blue       | 2868 KEGG_VASOPRESSIN_REGULATED_WATER_REABSORPT   | 13 | 39  | 16214 | 2978 | 1.81923  | 0.018065 |
| red        | 6703 BAELDE_DIABETIC_NEPHROPATHY_DN               | 21 | 396 | 15857 | 524  | 1.64485  | 0.018069 |
| greenyello | 1888 V\$E2F_Q2                                    | 5  | 164 | 16089 | 150  | 3.303455 | 0.018076 |
| greenyello | 2107 AAAGACA,MIR-511                              | 5  | 164 | 16089 | 150  | 3.303455 | 0.018076 |
| greenyello | 8226 VEGF_A_UP.V1_UP                              | 5  | 164 | 16089 | 150  | 3.303455 | 0.018076 |



|             |                                                    |     |      |       |      |          |          |
|-------------|----------------------------------------------------|-----|------|-------|------|----------|----------|
| greenyello  | 10098 GSE3982_NKCELL_VS_TH2_UP                     | 5   | 164  | 16089 | 150  | 3.303455 | 0.018076 |
| turquoise   | 2259 CTTTGT_V\$LEF1_Q2                             | 448 | 1608 | 14645 | 4169 | 1.08616  | 0.018088 |
| red         | 9638 GSE29615_CTRL_VS_DAY3_LAIV_IFLU_VACCINE_PBMC  | 11  | 165  | 16088 | 524  | 2.067812 | 0.018093 |
| magenta     | 1439 ION_TRANSMEMBRANE_TRANSPORTER_ACTIVITY        | 6   | 202  | 16051 | 167  | 2.890793 | 0.018126 |
| magenta     | 8078 PLASARI_TGFB1_TARGETS_10HR_DN                 | 6   | 202  | 16051 | 167  | 2.890793 | 0.018126 |
| turquoise   | 7226 MUELLER_PLURINET                              | 90  | 288  | 15965 | 4169 | 1.218293 | 0.01813  |
| lightyellow | 1227 METALLOEXOPEPTIDASE_ACTIVITY                  | 1   | 9    | 16244 | 33   | 54.72391 | 0.01813  |
| lightyellow | 2697 GNF2_SERPINI2                                 | 1   | 9    | 16244 | 33   | 54.72391 | 0.01813  |
| lightyellow | 4137 REACTOME_SYNTHESIS_OF_BILE_ACIDS_AND_BILE_SAI | 1   | 9    | 16244 | 33   | 54.72391 | 0.01813  |
| lightyellow | 4471 REACTOME_PROSTANOID_LIGAND_RECEPTORS          | 1   | 9    | 16244 | 33   | 54.72391 | 0.01813  |
| lightgreen  | 5092 SABATES_COLORECTAL_ADENOMA_UP                 | 2   | 80   | 16173 | 42   | 9.674405 | 0.018138 |
| brown       | 3288 chr10q                                        | 2   | 2    | 16251 | 2190 | 7.421461 | 0.018149 |
| grey60      | 1827 V\$ZF5_01                                     | 3   | 206  | 16047 | 44   | 5.379413 | 0.018153 |
| blue        | 6338 CHIARETTI_ACUTE_LYMPHOBLASTIC_LEUKEMIA_ZAP7C  | 19  | 64   | 16189 | 2978 | 1.620252 | 0.018158 |
| salmon      | 10030 GSE3982_MAC_VS_NEUTROPHIL_UP                 | 5   | 194  | 16059 | 127  | 3.29836  | 0.01816  |
| salmon      | 10053 GSE3982_NEUTROPHIL_VS_CENT_MEMORY_CD4_TCEL   | 5   | 194  | 16059 | 127  | 3.29836  | 0.01816  |
| salmon      | 10224 GSE9006_HEALTHY_VS_TYPE_1_DIABETES_PBMC_AT_I | 5   | 194  | 16059 | 127  | 3.29836  | 0.01816  |
| cyan        | 7672 KYNG_WERNER_SYNDROM_AND_NORMAL_AGING_DN       | 4   | 212  | 16041 | 77   | 3.982602 | 0.018166 |
| greenyello  | 2879 KEGG_PATHWAYS_IN_CANCER                       | 7   | 290  | 15963 | 150  | 2.615425 | 0.018169 |
| blue        | 10256 GSE9650_NAIVE_VS_EXHAUSTED_CD8_TCELL_UP      | 48  | 196  | 16057 | 2978 | 1.336577 | 0.018178 |
| brown       | 8315 RB_P107_DN.V1_DN                              | 25  | 121  | 16132 | 2190 | 1.53336  | 0.018191 |
| red         | 1920 V\$NFAT_Q4_01                                 | 13  | 209  | 16044 | 524  | 1.929298 | 0.018209 |
| turquoise   | 8492 GSE12366_GC_BCELL_VS_PLASMA_CELL_UP           | 62  | 190  | 16063 | 4169 | 1.272154 | 0.018211 |
| turquoise   | 9091 GSE17721_LPS_VS_GARDIQUIMOD_24H_BMDM_DN       | 62  | 190  | 16063 | 4169 | 1.272154 | 0.018211 |
| turquoise   | 9109 GSE17721_0.5H_VS_24H_POLYIC_BMDM_DN           | 62  | 190  | 16063 | 4169 | 1.272154 | 0.018211 |
| tan         | 8820 GSE16522_ANTI_CD3CD28_STIM_VS_UNSTIM_NAIVE_I  | 5   | 170  | 16083 | 145  | 3.296755 | 0.018217 |
| tan         | 9054 GSE17721_LPS_VS_CPG_24H_BMDM_UP               | 5   | 170  | 16083 | 145  | 3.296755 | 0.018217 |
| purple      | 8883 GSE17721_CTRL_VS_CPG_1H_BMDM_DN               | 5   | 157  | 16096 | 157  | 3.296888 | 0.018218 |
| purple      | 9620 GSE28237_FOLLICULAR_VS_LATE_GC_BCELL_UP       | 5   | 157  | 16096 | 157  | 3.296888 | 0.018218 |
| pink        | 448 CARBOHYDRATE_TRANSPORT                         | 2   | 15   | 16238 | 228  | 9.504678 | 0.018242 |
| pink        | 870 PIGMENT_METABOLIC_PROCESS                      | 2   | 15   | 16238 | 228  | 9.504678 | 0.018242 |
| pink        | 1154 SH3_DOMAIN_BINDING                            | 2   | 15   | 16238 | 228  | 9.504678 | 0.018242 |
| pink        | 1338 TRANSMEMBRANE_RECEPTOR_PROTEIN_PHOSPHATAS     | 2   | 15   | 16238 | 228  | 9.504678 | 0.018242 |
| pink        | 4425 REACTOME_POST_CHAPERONIN_TUBULIN_FOLDING_P    | 2   | 15   | 16238 | 228  | 9.504678 | 0.018242 |
| pink        | 4946 ROY_WOUND_BLOOD_VESSEL_DN                     | 2   | 15   | 16238 | 228  | 9.504678 | 0.018242 |
| pink        | 5051 TONKS_TARGETS_OF_RUNX1_RUNX1T1_FUSION_ERYTI   | 2   | 15   | 16238 | 228  | 9.504678 | 0.018242 |
| pink        | 5965 SHIN_B_CELL_LYMPHOMA_CLUSTER_9                | 2   | 15   | 16238 | 228  | 9.504678 | 0.018242 |
| pink        | 7711 MIKKELSEN_ES_HCP_WITH_H3K27ME3                | 2   | 15   | 16238 | 228  | 9.504678 | 0.018242 |
| turquoise   | 2590 GNF2_HAT1                                     | 20  | 50   | 16203 | 4169 | 1.559415 | 0.018244 |
| brown       | 4031 PID_AVB3_INTEGRIN_PATHWAY                     | 15  | 63   | 16190 | 2190 | 1.767015 | 0.018247 |
| brown       | 5174 ENK_UV_RESPONSE_EPIDERMIS_DN                  | 79  | 467  | 15786 | 2190 | 1.255451 | 0.01825  |
| purple      | 3572 MODULE_84                                     | 10  | 480  | 15773 | 157  | 2.156714 | 0.018257 |
| blue        | 3970 PID_MYC_ACTIVPATHWAY                          | 22  | 77   | 16176 | 2978 | 1.55934  | 0.018261 |
| turquoise   | 6331 VERNELL_RETINOBLASTOMA_PATHWAY_UP             | 26  | 69   | 16184 | 4169 | 1.469014 | 0.018264 |
| purple      | 3865 MODULE_456                                    | 4   | 104  | 16149 | 157  | 3.981627 | 0.018287 |
| purple      | 7978 AZARE_NEOPLASTIC_TRANSFORMATION_BY_STAT3_DN   | 4   | 104  | 16149 | 157  | 3.981627 | 0.018287 |
| red         | 7943 MIYAGAWA_TARGETS_OF_EWSR1_ETS_FUSIONS_DN      | 12  | 187  | 16066 | 524  | 1.990407 | 0.018292 |
| red         | 8563 GSE13484_UNSTIM_VS_3H_YF17D_VACCINE_STIM_PB   | 12  | 187  | 16066 | 524  | 1.990407 | 0.018292 |
| red         | 8571 GSE13484_12H_VS_3H_YF17D_VACCINE_STIM_PBMC    | 12  | 187  | 16066 | 524  | 1.990407 | 0.018292 |
| red         | 9300 GSE2197_IMMUNOSUPPRESSIVE_DNA_VS_UNTREATED    | 12  | 187  | 16066 | 524  | 1.990407 | 0.018292 |
| red         | 9484 GSE26669_CD4_VS_CD8_TCELL_IN_MLR_COSTIM_BLOI  | 12  | 187  | 16066 | 524  | 1.990407 | 0.018292 |
| red         | 9829 GSE360_DC_VS_MAC_M_TUBERCULOSIS_DN            | 12  | 187  | 16066 | 524  | 1.990407 | 0.018292 |
| red         | 10213 GSE8384_CTRL_VS_B_ABORTUS_4H_MAC_CELL_LINE_I | 12  | 187  | 16066 | 524  | 1.990407 | 0.018292 |
| green       | 5708 CALVET_IRINOTECAN_SENSITIVE_VS_REVERTED_DN    | 2   | 3    | 16250 | 1305 | 8.302937 | 0.018294 |
| pink        | 1726 V\$GATA6_01                                   | 7   | 191  | 16062 | 228  | 2.612542 | 0.018344 |
| pink        | 10194 GSE7852_TREG_VS_TCONV_THYMUS_UP              | 7   | 191  | 16062 | 228  | 2.612542 | 0.018344 |
| black       | 1476 V\$CREBP1_01                                  | 7   | 154  | 16099 | 283  | 2.610504 | 0.01835  |
| lightgreen  | 1798 V\$MAF_Q6                                     | 3   | 217  | 16036 | 42   | 5.349901 | 0.018386 |
| magenta     | 3383 chr20q13                                      | 5   | 148  | 16105 | 167  | 3.287951 | 0.018408 |
| magenta     | 8800 GSE15930_STIM_VS_STIM_AND_TRICHOSTATINA_24H   | 5   | 148  | 16105 | 167  | 3.287951 | 0.018408 |

|            |                                                   |    |     |       |      |          |          |
|------------|---------------------------------------------------|----|-----|-------|------|----------|----------|
| blue       | 8674 GSE14350_IL2RB_KO_VS_WT_TREG_UP              | 45 | 182 | 16071 | 2978 | 1.349429 | 0.018413 |
| greenyello | 2233 TGANTCA_V\$AP1_C                             | 15 | 895 | 15358 | 150  | 1.815978 | 0.018418 |
| yellow     | 8906 GSE17721_CTRL_VS_GARDIQUIMOD_8H_BMDM_UP      | 26 | 193 | 16060 | 1426 | 1.53543  | 0.018427 |
| yellow     | 9339 GSE22886_IGG_IGA_MEMORY_BCELL_VS_BLOOD_PLAS  | 26 | 193 | 16060 | 1426 | 1.53543  | 0.018427 |
| yellow     | 9360 GSE22886_NAIVE_TCELL_VS_DC_UP                | 26 | 193 | 16060 | 1426 | 1.53543  | 0.018427 |
| cyan       | 4047 PID_IL6_7PATHWAY                             | 2  | 44  | 16209 | 77   | 9.594451 | 0.018431 |
| cyan       | 6310 ZHAN_MULTIPLE_MYELOMA_CD2_UP                 | 2  | 44  | 16209 | 77   | 9.594451 | 0.018431 |
| grey60     | 7935 BRUINS_UVC_RESPONSE_VIA_TP53_GROUP_C         | 2  | 77  | 16176 | 44   | 9.594451 | 0.018431 |
| turquoise  | 3129 chr1p13                                      | 30 | 82  | 16171 | 4169 | 1.426294 | 0.018436 |
| turquoise  | 6336 NGUYEN_NOTCH1_TARGETS_DN                     | 30 | 82  | 16171 | 4169 | 1.426294 | 0.018436 |
| lightcyan  | 7349 RUTELLA_RESPONSE_TO_HGF_UP                   | 5  | 402 | 15851 | 62   | 3.260512 | 0.018456 |
| green      | 538 NITROGEN_COMPOUND_METABOLIC_PROCESS           | 18 | 132 | 16121 | 1305 | 1.698328 | 0.018464 |
| green      | 38 EXTRACELLULAR_REGION                           | 33 | 282 | 15971 | 1305 | 1.457431 | 0.018467 |
| turquoise  | 2153 RRAGTTGT_UNKNOWN                             | 66 | 204 | 16049 | 4169 | 1.261291 | 0.01848  |
| turquoise  | 7862 CHICAS_RB1_TARGETS_GROWING                   | 66 | 204 | 16049 | 4169 | 1.261291 | 0.01848  |
| purple     | 3583 MODULE_95                                    | 9  | 411 | 15842 | 157  | 2.266912 | 0.018486 |
| greenyello | 4868 DAVICIONI_TARGETS_OF_PAX_FOXO1_FUSIONS_UP    | 6  | 226 | 16027 | 150  | 2.876637 | 0.0185   |
| greenyello | 5392 EBAUER_TARGETS_OF_PAX3_FOXO1_FUSION_UP       | 5  | 165 | 16088 | 150  | 3.283434 | 0.018507 |
| purple     | 4762 REACTOME_TELOMERE_MAINTENANCE                | 3  | 58  | 16195 | 157  | 5.354601 | 0.01852  |
| salmon     | 8430 GSE10325_LUPUS_CD4_TCELL_VS_LUPUS_MYELOID_U  | 5  | 195 | 16058 | 127  | 3.281446 | 0.018525 |
| salmon     | 8840 GSE17721_CTRL_VS_LPS_6H_BMDM_UP              | 5  | 195 | 16058 | 127  | 3.281446 | 0.018525 |
| salmon     | 9096 GSE17721_0.5H_VS_8H_LPS_BMDM_UP              | 5  | 195 | 16058 | 127  | 3.281446 | 0.018525 |
| blue       | 9307 GSE22886_CD8_VS_CD4_NAIVE_TCELL_DN           | 42 | 168 | 16085 | 2978 | 1.364422 | 0.018529 |
| green      | 207 SYNAPSE                                       | 5  | 20  | 16233 | 1305 | 3.113602 | 0.018542 |
| green      | 4465 REACTOME_GLUCAGON_TYPE_LIGAND_RECEPTORS      | 5  | 20  | 16233 | 1305 | 3.113602 | 0.018542 |
| brown      | 998 ORGAN_DEVELOPMENT                             | 67 | 388 | 15865 | 2190 | 1.281541 | 0.018542 |
| lightcyan  | 9241 GSE18791_UNSTIM_VS_NEWCATSLE_VIRUS_DC_2H_DI  | 3  | 147 | 16106 | 62   | 5.349901 | 0.018587 |
| lightcyan  | 9593 GSE27786_CD8_TCELL_VS_ERYTHROBLAST_DN        | 3  | 147 | 16106 | 62   | 5.349901 | 0.018587 |
| yellow     | 8808 GSE15930_STIM_VS_STIM_AND_IL-12_72H_CD8_T_CE | 25 | 184 | 16069 | 1426 | 1.548589 | 0.018635 |
| yellow     | 9524 GSE2706_2H_VS_8H_LPS_STIM_DC_UP              | 25 | 184 | 16069 | 1426 | 1.548589 | 0.018635 |
| red        | 1032 NUCLEOCYTOPLASMIC_TRANSPORT                  | 7  | 84  | 16169 | 524  | 2.584765 | 0.01864  |
| red        | 7806 SASSON_RESPONSE_TO_GONADOTROPHINS_UP         | 7  | 84  | 16169 | 524  | 2.584765 | 0.01864  |
| yellow     | 5061 UDAYAKUMAR_MED1_TARGETS_UP                   | 19 | 130 | 16123 | 1426 | 1.665805 | 0.018665 |
| purple     | 773 PROTEIN_COMPLEX_ASSEMBLY                      | 5  | 158 | 16095 | 157  | 3.276022 | 0.018671 |
| turquoise  | 2275 CGTSACG_V\$PAX3_B                            | 45 | 132 | 16121 | 4169 | 1.329047 | 0.018673 |
| lightcyan  | 5518 SCHEIDEREIT_IKK_INTERACTING_PROTEINS         | 2  | 55  | 16198 | 62   | 9.532551 | 0.018676 |
| lightcyan  | 7915 WIERENGA_STAT5A_TARGETS_GROUP2               | 2  | 55  | 16198 | 62   | 9.532551 | 0.018676 |
| turquoise  | 4153 REACTOME_CROSS_PRESENTATION_OF_SOLUBLE_EXO   | 19 | 47  | 16206 | 4169 | 1.576004 | 0.018708 |
| red        | 4900 PRAMOONJAGO_SOX4_TARGETS_UP                  | 5  | 48  | 16205 | 524  | 3.230956 | 0.018715 |
| red        | 5351 BEGUM_TARGETS_OF_PAX3_FOXO1_FUSION_UP        | 5  | 48  | 16205 | 524  | 3.230956 | 0.018715 |
| salmon     | 2719 KEGG_CITRATE_CYCLE_TCA_CYCLE                 | 2  | 27  | 16226 | 127  | 9.479732 | 0.018717 |
| brown      | 10255 GSE9650_NAIVE_VS_EFF_CD8_TCELL_DN           | 37 | 195 | 16058 | 2190 | 1.408175 | 0.018736 |
| magenta    | 1315 RECEPTOR_BINDING                             | 7  | 262 | 15991 | 167  | 2.600242 | 0.01874  |
| purple     | 3647 MODULE_163                                   | 9  | 412 | 15841 | 157  | 2.261409 | 0.018747 |
| purple     | 7931 JOHNSTONE_PARVB_TARGETS_3_UP                 | 9  | 412 | 15841 | 157  | 2.261409 | 0.018747 |
| greenyello | 1468 V\$E2F_01                                    | 3  | 61  | 16192 | 150  | 5.328852 | 0.018775 |
| salmon     | 4159 REACTOME_ANTIGEN_PROCESSING_CROSS_PRESENTA   | 3  | 72  | 16181 | 127  | 5.332349 | 0.018791 |
| red        | 4661 REACTOME_ION_CHANNEL_TRANSPORT               | 4  | 32  | 16221 | 524  | 3.877147 | 0.018791 |
| green      | 2108 ATAAGCT,MIR-21                               | 15 | 104 | 16149 | 1305 | 1.796309 | 0.018798 |
| grey60     | 4546 REACTOME_PURINE_CATABOLISM                   | 1  | 7   | 16246 | 44   | 52.76948 | 0.018801 |
| grey60     | 5043 TONKS_TARGETS_OF_RUNX1_RUNX1T1_FUSION_SUST.  | 1  | 7   | 16246 | 44   | 52.76948 | 0.018801 |
| green      | 4987 OSWALD_HEMATOPOIETIC_STEM_CELL_IN_COLLAGEN   | 27 | 221 | 16032 | 1305 | 1.521579 | 0.018814 |
| cyan       | 3014 BIOCARTA_LLECTIN_PATHWAY                     | 1  | 4   | 16249 | 77   | 52.76948 | 0.018818 |
| cyan       | 5566 BEGUM_TARGETS_OF_PAX3_FOXO1_FUSION_AND_PA    | 1  | 4   | 16249 | 77   | 52.76948 | 0.018818 |
| yellow     | 5129 GRAHAM_NORMAL QUIESCENT_VS_NORMAL_DIVIDIN    | 14 | 87  | 16166 | 1426 | 1.834099 | 0.018825 |
| red        | 9267 GSE20366_EX_VIVO_VS_DEC205_CONVERSION_NAIVE  | 11 | 166 | 16087 | 524  | 2.055355 | 0.018836 |
| blue       | 2690 GNF2_RAN                                     | 24 | 86  | 16167 | 2978 | 1.523076 | 0.018848 |
| greenyello | 4950 NEWMAN_ERCC6_TARGETS_DN                      | 2  | 23  | 16230 | 150  | 9.422029 | 0.018855 |
| green      | 9887 GSE360_HIGH_DOSE_B_MALAYI_VS_M_TUBERCULOSIS  | 23 | 181 | 16072 | 1305 | 1.582604 | 0.018857 |
| brown      | 2107 AAAGACA,MIR-511                              | 32 | 164 | 16089 | 2190 | 1.44809  | 0.018859 |

|            |      |                                               |     |      |       |      |          |          |
|------------|------|-----------------------------------------------|-----|------|-------|------|----------|----------|
| yellow     | 972  | DNA_PACKAGING                                 | 7   | 32   | 16221 | 1426 | 2.493228 | 0.018862 |
| brown      | 5145 | RODRIGUES_THYROID_CARCIOMA_ANAPLASTIC_DN      | 81  | 481  | 15772 | 2190 | 1.249768 | 0.018863 |
| turquoise  | 2947 | BIOCARTA_HDAC_PATHWAY                         | 12  | 26   | 16227 | 4169 | 1.799325 | 0.018864 |
| turquoise  | 6866 | MARSON_FOXP3_TARGETS_STIMULATED_UP            | 12  | 26   | 16227 | 4169 | 1.799325 | 0.018864 |
| yellow     | 4429 | REACTOME_METABOLISM_OF_PROTEINS               | 47  | 394  | 15859 | 1426 | 1.359614 | 0.01887  |
| purple     | 1417 | CALMODULIN_BINDING                            | 2   | 22   | 16231 | 157  | 9.411118 | 0.018871 |
| purple     | 2626 | GNF2_CDH11                                    | 2   | 22   | 16231 | 157  | 9.411118 | 0.018871 |
| purple     | 3050 | BIOCARTA_RAC1_PATHWAY                         | 2   | 22   | 16231 | 157  | 9.411118 | 0.018871 |
| purple     | 4457 | REACTOME_INHIBITION_OF_INSULIN_SECRETION_BY_I | 2   | 22   | 16231 | 157  | 9.411118 | 0.018871 |
| purple     | 7611 | FONTAINE_THYROID_TUMOR_UNCERTAIN_MALIGNAN     | 2   | 22   | 16231 | 157  | 9.411118 | 0.018871 |
| purple     | 7702 | TIAN_TNF_SIGNALING_NOT_VIA_NFKB               | 2   | 22   | 16231 | 157  | 9.411118 | 0.018871 |
| purple     | 2834 | KEGG_TIGHT_JUNCTION                           | 4   | 105  | 16148 | 157  | 3.943706 | 0.018873 |
| salmon     | 8870 | GSE17721_CTRL_VS_PAM3CSK4_4H_BMDM_UP          | 5   | 196  | 16057 | 127  | 3.264704 | 0.018894 |
| salmon     | 9126 | GSE17721_0.5H_VS_12H_CPG_BMDM_UP              | 5   | 196  | 16057 | 127  | 3.264704 | 0.018894 |
| green      | 5222 | GRAESSMANN_APOPTOSIS_BY_SERUM_DEPRIVATION_    | 26  | 211  | 16042 | 1305 | 1.534666 | 0.018902 |
| blue       | 8426 | GSE10325_BCELL_VS_MYELOID_UP                  | 46  | 187  | 16066 | 2978 | 1.342533 | 0.018918 |
| magenta    | 6924 | ZHANG_GATA6_TARGETS_DN                        | 3   | 55   | 16198 | 167  | 5.308547 | 0.018922 |
| magenta    | 7915 | WIERENGA_STAT5A_TARGETS_GROUP2                | 3   | 55   | 16198 | 167  | 5.308547 | 0.018922 |
| greenyello | 5167 | KOKKINAKIS_METHIONINE_DEPRIVATION_96HR_UP     | 4   | 110  | 16143 | 150  | 3.940121 | 0.018937 |
| brown      | 7034 | ACEVEDO_LIVER_CANCER_UP                       | 147 | 929  | 15324 | 2190 | 1.174332 | 0.018943 |
| brown      | 613  | REGULATION_OF_GENE_EXPRESSION                 | 98  | 595  | 15658 | 2190 | 1.222358 | 0.018945 |
| red        | 755  | NUCLEOTIDE_BIOSYNTHETIC_PROCESS               | 3   | 18   | 16235 | 524  | 5.169529 | 0.018956 |
| red        | 1389 | CHANNEL_REGULATOR_ACTIVITY                    | 3   | 18   | 16235 | 524  | 5.169529 | 0.018956 |
| red        | 2962 | BIOCARTA_CALCINEURIN_PATHWAY                  | 3   | 18   | 16235 | 524  | 5.169529 | 0.018956 |
| red        | 6081 | FERRANDO_TAL1_NEIGHBORS                       | 3   | 18   | 16235 | 524  | 5.169529 | 0.018956 |
| red        | 6524 | WU_HBX_TARGETS_3_UP                           | 3   | 18   | 16235 | 524  | 5.169529 | 0.018956 |
| red        | 7165 | CLIMENT_BREAST_CANCER_COPY_NUMBER_UP          | 3   | 18   | 16235 | 524  | 5.169529 | 0.018956 |
| red        | 7607 | KUROZUMI_RESPONSE_TO_ONCOCYTIC_VIRUS_AND_C    | 3   | 18   | 16235 | 524  | 5.169529 | 0.018956 |
| blue       | 7190 | CADWELL_ATG16L1_TARGETS_DN                    | 18  | 60   | 16193 | 2978 | 1.637307 | 0.018987 |
| turquoise  | 8955 | GSE17721_PAM3CSK4_VS_CPG_4H_BMDM_DN           | 59  | 180  | 16073 | 4169 | 1.277854 | 0.018988 |
| turquoise  | 9506 | GSE2706_UNSTIM_VS_2H_LPS_AND_R848_DC_UP       | 59  | 180  | 16073 | 4169 | 1.277854 | 0.018988 |
| red        | 2268 | TGGAAA_V\$NFAT_Q4_01                          | 63  | 1506 | 14747 | 524  | 1.297531 | 0.018988 |
| turquoise  | 650  | PROTEIN_CATABOLIC_PROCESS                     | 25  | 66   | 16187 | 4169 | 1.476718 | 0.01903  |
| turquoise  | 6027 | TCGA_GLIOMASTOMA_COPY_NUMBER_UP               | 25  | 66   | 16187 | 4169 | 1.476718 | 0.01903  |
| magenta    | 663  | SYNAPTIC_TRANSMISSION                         | 4   | 99   | 16154 | 167  | 3.932257 | 0.019039 |
| green      | 5230 | LANDIS_ERBB2_BREAST_PRENEOPLASTIC_DN          | 9   | 51   | 16202 | 1305 | 2.197836 | 0.019058 |
| grey60     | 1464 | V\$SP1_01                                     | 3   | 210  | 16043 | 44   | 5.276948 | 0.019094 |
| brown      | 9814 | GSE360_CTRL_VS_M_TUBERCULOSIS_MAC_UP          | 36  | 189  | 16064 | 2190 | 1.413612 | 0.0191   |
| red        | 1444 | ATP_BINDING                                   | 10  | 145  | 16108 | 524  | 2.139116 | 0.019107 |
| red        | 6033 | ONDER_CDH1_TARGETS_2_DN                       | 20  | 374  | 15879 | 524  | 1.658672 | 0.019118 |
| blue       | 7666 | WINNEPENNINCKX_MELANOMA_METASTASIS_UP         | 40  | 159  | 16094 | 2978 | 1.373004 | 0.019152 |
| red        | 6801 | DURCHDEWALD_SKIN_CARCIANOGENESIS_DN           | 14  | 233  | 16020 | 524  | 1.863693 | 0.019156 |
| red        | 3516 | MODULE_24                                     | 19  | 350  | 15903 | 524  | 1.68379  | 0.019158 |
| blue       | 5457 | LINDGREN_BLADDER_CANCER_WITH_LOH_IN_CHR9Q     | 30  | 113  | 16140 | 2978 | 1.448944 | 0.019172 |
| red        | 3865 | MODULE_456                                    | 8   | 104  | 16149 | 524  | 2.385937 | 0.019177 |
| turquoise  | 9057 | GSE17721_POLYIC_VS_GARDIQUIMOD_0.5H_BMDM_E    | 61  | 187  | 16066 | 4169 | 1.271715 | 0.019182 |
| purple     | 3205 | chr4q33                                       | 1   | 2    | 16251 | 157  | 51.76115 | 0.019227 |
| purple     | 7752 | LY_AGING_OLD_UP                               | 1   | 2    | 16251 | 157  | 51.76115 | 0.019227 |
| blue       | 4139 | REACTOME_SIGNALING_BY_RHO_GTPASES             | 28  | 104  | 16149 | 2978 | 1.469378 | 0.01925  |
| magenta    | 5863 | SCHAEFFER_PROSTATE_DEVELOPMENT_48HR_DN        | 8   | 325  | 15928 | 167  | 2.395652 | 0.019252 |
| lightcyan  | 8756 | GSE15659_CD45RA_NEG_CD4_TCELL_VS_ACTIVATED_1  | 3   | 149  | 16104 | 62   | 5.27809  | 0.019259 |
| red        | 7443 | MEISSNER_BRAIN_HCP_WITH_H3K4ME3_AND_H3K27M    | 36  | 779  | 15474 | 524  | 1.4334   | 0.019261 |
| salmon     | 9175 | GSE17974_CTRL_VS_ACT_IL4_AND_ANTI_IL12_4H_CD4 | 5   | 197  | 16056 | 127  | 3.248131 | 0.019268 |
| salmon     | 9226 | GSE18791_CTRL_VS_NEWCASTLE_VIRUS_DC_8H_UP     | 5   | 197  | 16056 | 127  | 3.248131 | 0.019268 |
| salmon     | 9392 | GSE22886_NAIVE_CD4_TCELL_VS_48H_ACT_TH1_UP    | 5   | 197  | 16056 | 127  | 3.248131 | 0.019268 |
| pink       | 9118 | GSE17721_0.5H_VS_8H_PAM3CSK4_BMDM_UP          | 7   | 193  | 16060 | 228  | 2.58547  | 0.019303 |
| pink       | 9132 | GSE17721_0.5H_VS_24H_CPG_BMDM_UP              | 7   | 193  | 16060 | 228  | 2.58547  | 0.019303 |
| green      | 8371 | KRAS.BREAST_UP.V1_UP                          | 13  | 86   | 16167 | 1305 | 1.882643 | 0.019313 |
| cyan       | 1499 | V\$CP2_01                                     | 4   | 216  | 16037 | 77   | 3.90885  | 0.019313 |
| cyan       | 7364 | VANTVEER_BREAST_CANCER_ESR1_DN                | 4   | 216  | 16037 | 77   | 3.90885  | 0.019313 |

|             |                                                   |    |     |       |      |          |          |
|-------------|---------------------------------------------------|----|-----|-------|------|----------|----------|
| lightcyan   | 6241 NADLER_OBESITY_UP                            | 2  | 56  | 16197 | 62   | 9.362327 | 0.01932  |
| lightcyan   | 7708 NAKAYAMA_SOFT_TISSUE_TUMORS_PCA2_DN          | 2  | 56  | 16197 | 62   | 9.362327 | 0.01932  |
| cyan        | 3750 MODULE_292                                   | 3  | 120 | 16133 | 77   | 5.276948 | 0.019327 |
| brown       | 6195 LU_IL4_SIGNALING                             | 20 | 92  | 16161 | 2190 | 1.613361 | 0.01933  |
| turquoise   | 8570 GSE13484_12H_VS_3H_YF17D_VACCINE_STIM_PBMC_  | 63 | 194 | 16059 | 4169 | 1.26602  | 0.019337 |
| turquoise   | 8585 GSE13485_DAY1_VS_DAY7_YF17D_VACCINE_PBMC_DI  | 63 | 194 | 16059 | 4169 | 1.26602  | 0.019337 |
| turquoise   | 8811 GSE15930_STIM_VS_STIM_AND_IFNAB_72H_CD8_T_C  | 63 | 194 | 16059 | 4169 | 1.26602  | 0.019337 |
| turquoise   | 8874 GSE17721_CTRL_VS_PAM3CSK4_8H_BMDM_UP         | 63 | 194 | 16059 | 4169 | 1.26602  | 0.019337 |
| turquoise   | 1199 PROTEIN_KINASE_ACTIVITY                      | 83 | 264 | 15989 | 4169 | 1.225676 | 0.01938  |
| midnightb   | 6530 MARIADASON_REGULATED_BY_HISTONE_ACETYLATIOP  | 2  | 49  | 16204 | 71   | 9.34349  | 0.019386 |
| black       | 5211 CREIGHTON_AKT1_SIGNALING_VIA_MTOR_UP         | 3  | 33  | 16220 | 283  | 5.221009 | 0.019388 |
| greenyello  | 9793 GSE360_CTRL_VS_L_DONOVANI_DC_DN              | 5  | 167 | 16086 | 150  | 3.244112 | 0.019388 |
| greenyello  | 10264 GSE9650_EXHAUSTED_VS_MEMORY_CD8_TCELL_UP    | 5  | 167 | 16086 | 150  | 3.244112 | 0.019388 |
| magenta     | 7745 SENGUPTA_EBNA1_ANTICORRELATED                | 5  | 150 | 16103 | 167  | 3.244112 | 0.019388 |
| magenta     | 268 NEGATIVE_REGULATION_OF_MULTICELLULAR_ORGANI   | 2  | 21  | 16232 | 167  | 9.268891 | 0.01939  |
| magenta     | 672 REGULATION_OF_CYTOKINE_PRODUCTION             | 2  | 21  | 16232 | 167  | 9.268891 | 0.01939  |
| magenta     | 747 POSITIVE_REGULATION_OF_LYMPHOCYTE_ACTIVATION  | 2  | 21  | 16232 | 167  | 9.268891 | 0.01939  |
| magenta     | 3435 chr4q13                                      | 2  | 21  | 16232 | 167  | 9.268891 | 0.01939  |
| magenta     | 5594 DACOSTA_ERCC3_ALLELE_XPCS_VS_TTD_UP          | 2  | 21  | 16232 | 167  | 9.268891 | 0.01939  |
| magenta     | 6300 NUMATA_CSF3_SIGNALING_VIA_STAT3              | 2  | 21  | 16232 | 167  | 9.268891 | 0.01939  |
| brown       | 6679 JAZAERI_BREAST_CANCER_BRCA1_VS_BRCA2_UP      | 12 | 47  | 16206 | 2190 | 1.894841 | 0.019398 |
| pink        | 735 CELLULAR_HOMEOSTASIS                          | 5  | 110 | 16143 | 228  | 3.240231 | 0.019398 |
| blue        | 8466 GSE11864_UNTREATED_VS_CSF1_IFNG_PAM3CYS_IN_I | 47 | 192 | 16061 | 2978 | 1.335997 | 0.019404 |
| greenyello  | 5394 PEREZ_TP63_TARGETS                           | 7  | 294 | 15959 | 150  | 2.579841 | 0.019426 |
| turquoise   | 3451 ST_TUMOR_NECROSIS_FACTOR_PATHWAY             | 13 | 29  | 16224 | 4169 | 1.74762  | 0.019427 |
| black       | 8924 GSE17721_LPS_VS_POLYIC_12H_BMDM_UP           | 8  | 192 | 16061 | 283  | 2.392962 | 0.019431 |
| green       | 8131 BOSCO_EPITHELIAL_DIFFERENTIATION_MODULE      | 7  | 35  | 16218 | 1305 | 2.490881 | 0.019432 |
| lightyellow | 7443 MEISSNER_BRAIN_HCP_WITH_H3K4ME3_AND_H3K27M   | 5  | 779 | 15474 | 33   | 3.161201 | 0.019443 |
| turquoise   | 6952 LIN_MELANOMA_COPY_NUMBER_DN                  | 17 | 41  | 16212 | 4169 | 1.616466 | 0.019447 |
| pink        | 3555 MODULE_66                                    | 12 | 433 | 15820 | 228  | 1.975568 | 0.019463 |
| purple      | 3776 MODULE_324                                   | 4  | 106 | 16147 | 157  | 3.906502 | 0.019469 |
| purple      | 8240 P53_DN.V2_UP                                 | 4  | 106 | 16147 | 157  | 3.906502 | 0.019469 |
| salmon      | 2417 MORF_MAP2K2                                  | 4  | 131 | 16122 | 127  | 3.907676 | 0.01947  |
| greenyello  | 3610 MODULE_122                                   | 4  | 111 | 16142 | 150  | 3.904625 | 0.019508 |
| brown       | 1365 RHO_GTPASE_ACTIVATOR_ACTIVITY                | 6  | 17  | 16236 | 2190 | 2.619339 | 0.01955  |
| brown       | 3834 MODULE_408                                   | 6  | 17  | 16236 | 2190 | 2.619339 | 0.01955  |
| brown       | 3942 PID_NFKAPPABATYPICALPATHWAY                  | 6  | 17  | 16236 | 2190 | 2.619339 | 0.01955  |
| brown       | 6603 YIH_RESPONSE_TO_ARSENITE_C4                  | 6  | 17  | 16236 | 2190 | 2.619339 | 0.01955  |
| brown       | 7984 KASLER_HDAC7_TARGETS_1_DN                    | 6  | 17  | 16236 | 2190 | 2.619339 | 0.01955  |
| blue        | 1333 OXIDOREDUCTASE_ACTIVITY_ACTING_ON_THE_CH_CH  | 8  | 20  | 16233 | 2978 | 2.183076 | 0.019554 |
| red         | 1332 PATTERN_RECOGNITION_RECEPTOR_ACTIVITY        | 2  | 7   | 16246 | 524  | 8.86205  | 0.019564 |
| red         | 2701 GNF2_SPRR1B                                  | 2  | 7   | 16246 | 524  | 8.86205  | 0.019564 |
| red         | 4194 REACTOME_DEFENSINS                           | 2  | 7   | 16246 | 524  | 8.86205  | 0.019564 |
| red         | 4277 REACTOME_ABACAVIR_TRANSPORT_AND_METABOLISI   | 2  | 7   | 16246 | 524  | 8.86205  | 0.019564 |
| red         | 4546 REACTOME_PURINE_CATABOLISM                   | 2  | 7   | 16246 | 524  | 8.86205  | 0.019564 |
| red         | 7256 MOOTHA_ROS                                   | 2  | 7   | 16246 | 524  | 8.86205  | 0.019564 |
| red         | 8013 RAFFEL_VEGFA_TARGETS_UP                      | 2  | 7   | 16246 | 524  | 8.86205  | 0.019564 |
| yellow      | 8448 GSE11057_NAIVE_CD4_VS_PBMC_CD4_TCELL_UP      | 26 | 194 | 16059 | 1426 | 1.527516 | 0.019565 |
| yellow      | 8814 GSE16522_MEMORY_VS_NAIVE_CD8_TCELL_UP        | 26 | 194 | 16059 | 1426 | 1.527516 | 0.019565 |
| yellow      | 8866 GSE17721_CTRL_VS_PAM3CSK4_1H_BMDM_UP         | 26 | 194 | 16059 | 1426 | 1.527516 | 0.019565 |
| yellow      | 9116 GSE17721_0.5H_VS_4H_PAM3CSK4_BMDM_UP         | 26 | 194 | 16059 | 1426 | 1.527516 | 0.019565 |
| lightcyan   | 8528 GSE13229_MATURITY_VS_INTMATURE_NKCELL_UP     | 3  | 150 | 16103 | 62   | 5.242903 | 0.019599 |
| purple      | 8261 RAF_UP.V1_DN                                 | 5  | 160 | 16093 | 157  | 3.235072 | 0.019599 |
| purple      | 9716 GSE30083_SP2_VS_SP3_THYMOCYTE_UP             | 5  | 160 | 16093 | 157  | 3.235072 | 0.019599 |
| greenyello  | 1661 V\$MYCMAX_B                                  | 6  | 229 | 16024 | 150  | 2.838952 | 0.019601 |
| red         | 8659 GSE1432_CTRL_VS_IFNG_1H_MICROGLIA_DN         | 11 | 167 | 16086 | 524  | 2.043047 | 0.019602 |
| red         | 8839 GSE17721_CTRL_VS_LPS_4H_BMDM_DN              | 11 | 167 | 16086 | 524  | 2.043047 | 0.019602 |
| red         | 9020 GSE17721_PAM3CSK4_VS_GADIQUIMOD_0.5H_BMDM    | 11 | 167 | 16086 | 524  | 2.043047 | 0.019602 |
| pink        | 7563 MEISSNER_NPC_HCP_WITH_H3K4ME2                | 11 | 383 | 15870 | 228  | 2.047352 | 0.019618 |
| salmon      | 8698 GSE1460_DP_THYMOCYTE_VS_NAIVE_CD4_TCELL_ADU  | 5  | 198 | 16055 | 127  | 3.231727 | 0.019648 |

|            |                                                    |     |      |       |      |          |          |
|------------|----------------------------------------------------|-----|------|-------|------|----------|----------|
| salmon     | 9357 GSE22886_DC_VS_MONOCYTE_DN                    | 5   | 198  | 16055 | 127  | 3.231727 | 0.019648 |
| red        | 7414 HAN_SATB1_TARGETS_UP                          | 19  | 351  | 15902 | 524  | 1.678992 | 0.019671 |
| magenta    | 4366 REACTOME_PEPTIDE_LIGAND_BINDING_RECEPTORS     | 4   | 100  | 16153 | 167  | 3.892934 | 0.019678 |
| magenta    | 8275 CTIP_DN.V1_DN                                 | 4   | 100  | 16153 | 167  | 3.892934 | 0.019678 |
| turquoise  | 2491 GCM_HDAC1                                     | 16  | 38   | 16215 | 4169 | 1.641489 | 0.019679 |
| lightgreen | 4926 CHARAFE_BREAST_CANCER_LUMINAL_VS_BASAL_DN     | 4   | 402  | 15851 | 42   | 3.850509 | 0.01969  |
| red        | 1403 PURINE_RIBONUCLEOTIDE_BINDING                 | 12  | 189  | 16064 | 524  | 1.969344 | 0.019709 |
| red        | 8717 GSE14769_UNSTIM_VS_40MIN_LPS_BMDM_DN          | 12  | 189  | 16064 | 524  | 1.969344 | 0.019709 |
| red        | 8825 GSE17580_TREG_VS_TEFF_DN                      | 12  | 189  | 16064 | 524  | 1.969344 | 0.019709 |
| red        | 9160 GSE17974_0H_VS_12H_IN_VITRO_ACT_CD4_TCELL_UP  | 12  | 189  | 16064 | 524  | 1.969344 | 0.019709 |
| red        | 10016 GSE3982_DC_VS_BCELL_UP                       | 12  | 189  | 16064 | 524  | 1.969344 | 0.019709 |
| turquoise  | 132 MICROTUBULE                                    | 14  | 32   | 16221 | 4169 | 1.70561  | 0.019712 |
| turquoise  | 1431 GENERAL_RNA_POLYMERASE_II_TRANSCRIPTION_FACT  | 14  | 32   | 16221 | 4169 | 1.70561  | 0.019712 |
| red        | 1335 TRANSCRIPTION_FACTOR_ACTIVITY                 | 16  | 280  | 15973 | 524  | 1.77241  | 0.019715 |
| purple     | 6207 FLECHNER_BIOPSY_KIDNEY_TRANSPLANT_REJECTED_V. | 10  | 486  | 15767 | 157  | 2.130088 | 0.019715 |
| brown      | 578 LEUKOCYTE_ACTIVATION                           | 14  | 58   | 16195 | 2190 | 1.791387 | 0.01972  |
| brown      | 3964 PID_AR_PATHWAY                                | 14  | 58   | 16195 | 2190 | 1.791387 | 0.01972  |
| brown      | 380 INTRACELLULAR_PROTEIN_TRANSPORT                | 28  | 140  | 16113 | 2190 | 1.484292 | 0.019735 |
| magenta    | 1825 V\$TFIIA_Q6                                   | 6   | 206  | 16047 | 167  | 2.834661 | 0.019755 |
| turquoise  | 1008 REGULATION_OF_CELL_CYCLE                      | 56  | 170  | 16083 | 4169 | 1.284224 | 0.01976  |
| turquoise  | 9220 GSE18791_CTRL_VS_NEWCASTLE_VIRUS_DC_2H_UP     | 56  | 170  | 16083 | 4169 | 1.284224 | 0.01976  |
| brown      | 3429 chr3q                                         | 3   | 5    | 16248 | 2190 | 4.452877 | 0.019768 |
| brown      | 4138 REACTOME_RECYCLING_OF_BILE_ACIDS_AND_SALTS    | 3   | 5    | 16248 | 2190 | 4.452877 | 0.019768 |
| brown      | 6123 CHESLER_BRAIN_QTL_TRANS                       | 3   | 5    | 16248 | 2190 | 4.452877 | 0.019768 |
| red        | 409 NUCLEAR_TRANSPORT                              | 7   | 85   | 16168 | 524  | 2.554356 | 0.019769 |
| red        | 3417 chr3q21                                       | 7   | 85   | 16168 | 524  | 2.554356 | 0.019769 |
| red        | 5080 TIEN_INTESTINE_PROBIOTICS_2HR_DN              | 7   | 85   | 16168 | 524  | 2.554356 | 0.019769 |
| turquoise  | 482 TRANSCRIPTION_INITIATION                       | 15  | 35   | 16218 | 4169 | 1.670801 | 0.01978  |
| turquoise  | 6149 CHESLER_BRAIN_HIGHEST_EXPRESSION              | 15  | 35   | 16218 | 4169 | 1.670801 | 0.01978  |
| turquoise  | 6611 GENTILE_UV_RESPONSE_CLUSTER_D6                | 15  | 35   | 16218 | 4169 | 1.670801 | 0.01978  |
| turquoise  | 6659 MMS_MOUSE_LYMPH_HIGH_4HRS_UP                  | 15  | 35   | 16218 | 4169 | 1.670801 | 0.01978  |
| turquoise  | 7664 GUTIERREZ_MULTIPLE_MYELOMA_DN                 | 15  | 35   | 16218 | 4169 | 1.670801 | 0.01978  |
| pink       | 7144 BOQUEST_STEM_CELL_DN                          | 7   | 194  | 16059 | 228  | 2.572142 | 0.019795 |
| blue       | 2556 GCM_SMO                                       | 17  | 56   | 16197 | 2978 | 1.656799 | 0.0198   |
| brown      | 8532 GSE13306_TREG_VS_TCONV_LAMINA_PROPRIA_UP      | 34  | 177  | 16076 | 2190 | 1.425591 | 0.019805 |
| brown      | 8841 GSE17721_CTRL_VS_LPS_6H_BMDM_DN               | 34  | 177  | 16076 | 2190 | 1.425591 | 0.019805 |
| yellow     | 8508 GSE12845_IGD_POS_BLOOD_VS_PRE_GC_TONSIL_BCEI  | 25  | 185  | 16068 | 1426 | 1.540218 | 0.019814 |
| yellow     | 9320 GSE22886_NAIVE_CD4_TCELL_VS_NKCELL_UP         | 25  | 185  | 16068 | 1426 | 1.540218 | 0.019814 |
| purple     | 164 MEMBRANE_FRACTION                              | 7   | 282  | 15971 | 157  | 2.569702 | 0.019824 |
| greenyello | 9294 GSE20715_0H_VS_6H_OZONE_TLR4_KO_LUNG_UP       | 5   | 168  | 16085 | 150  | 3.224802 | 0.019839 |
| magenta    | 5601 DIRMEIER_LMP1_RESPONSE_LATE_UP                | 3   | 56   | 16197 | 167  | 5.213751 | 0.019846 |
| brown      | 1868 GGAANCGGAANY_UNKNOWN                          | 22  | 104  | 16149 | 2190 | 1.569924 | 0.019853 |
| red        | 5148 GOZGIT_ESR1_TARGETS_UP                        | 9   | 125  | 16128 | 524  | 2.233237 | 0.019872 |
| blue       | 9128 GSE17721_0.5H_VS_4H_CPG_BMDM_UP               | 48  | 197  | 16056 | 2978 | 1.329792 | 0.019874 |
| blue       | 9401 GSE22886_UNSTIM_VS_IL15_STIM_NKCELL_DN        | 48  | 197  | 16056 | 2978 | 1.329792 | 0.019874 |
| blue       | 9544 GSE27786_LSK_VS_MONO_MAC_UP                   | 48  | 197  | 16056 | 2978 | 1.329792 | 0.019874 |
| yellow     | 7703 WONG_EMBRYONIC_STEM_CELL_CORE                 | 40  | 327  | 15926 | 1426 | 1.394204 | 0.01988  |
| lightgreen | 7372 SWEET_KRAS_ONCOGENIC_SIGNATURE                | 2   | 84   | 16169 | 42   | 9.213719 | 0.01988  |
| pink       | 227 PLASMA_MEMBRANE                                | 24  | 1095 | 15158 | 228  | 1.562413 | 0.019902 |
| cyan       | 7942 MIYAGAWA_TARGETS_OF_EWSR1_ETS_FUSIONS_UP      | 4   | 218  | 16035 | 77   | 3.872989 | 0.019903 |
| blue       | 4701 REACTOME_EARLY_PHASE_OF_HIV_LIFE_CYCLE        | 6   | 13   | 16240 | 2978 | 2.518934 | 0.019909 |
| blue       | 8101 FU_INTERACT_WITH_ALKBH8                       | 6   | 13   | 16240 | 2978 | 2.518934 | 0.019909 |
| tan        | 8782 GSE15930_NAIVE_VS_48H_IN_VITRO_STIM_CD8_TCELI | 5   | 174  | 16079 | 145  | 3.220967 | 0.019927 |
| yellow     | 2381 MORF_EIF3S2                                   | 31  | 241  | 16012 | 1426 | 1.466083 | 0.019931 |
| lightcyan  | 6705 DAZARD_UV_RESPONSE_CLUSTER_G1                 | 2   | 57   | 16196 | 62   | 9.198076 | 0.019974 |
| black      | 10122 GSE5463_CTRL_VS_DEXAMETHASONE_TREATED_THYM   | 8   | 193  | 16060 | 283  | 2.380564 | 0.019978 |
| greenyello | 8168 DURAND_STROMA_MAX_UP                          | 6   | 230  | 16023 | 150  | 2.826609 | 0.019978 |
| brown      | 2402 MORF_IKBKG                                    | 26  | 128  | 16125 | 2190 | 1.507484 | 0.019983 |
| turquoise  | 239 RNA_METABOLIC_PROCESS                          | 219 | 757  | 15496 | 4169 | 1.127846 | 0.019985 |
| turquoise  | 9066 GSE17721_POLYIC_VS_GARDIQUIMOD_8H_BMDM_UP     | 58  | 177  | 16076 | 4169 | 1.277487 | 0.020005 |

|             |       |                                              |    |      |       |      |          |          |
|-------------|-------|----------------------------------------------|----|------|-------|------|----------|----------|
| yellow      | 8643  | GSE14308_TH1_VS_INDUCED_TREG_DN              | 24 | 176  | 16077 | 1426 | 1.55422  | 0.020022 |
| yellow      | 8647  | GSE14308_TH17_VS_NAIVE_CD4_TCELL_DN          | 24 | 176  | 16077 | 1426 | 1.55422  | 0.020022 |
| yellow      | 934   | NEGATIVE_REGULATION_OF_CATALYTIC_ACTIVITY    | 10 | 55   | 16198 | 1426 | 2.072294 | 0.020026 |
| yellow      | 5813  | TONG_INTERACT_WITH_PTTG1                     | 10 | 55   | 16198 | 1426 | 2.072294 | 0.020026 |
| salmon      | 8702  | GSE1460_CD4_THYMOCYTE_VS_NAIVE_CD4_TCELL_CO  | 5  | 199  | 16054 | 127  | 3.215487 | 0.020032 |
| salmon      | 9442  | GSE24634_TREG_VS_TCONV_POST_DAY5_IL4_CONVER  | 5  | 199  | 16054 | 127  | 3.215487 | 0.020032 |
| salmon      | 9909  | GSE36476_CTRL_VS_TSST_ACT_16H_MEMORY_CD4_T   | 5  | 199  | 16054 | 127  | 3.215487 | 0.020032 |
| brown       | 658   | MEMBRANE_ORGANIZATION_AND_BIOGENESIS         | 25 | 122  | 16131 | 2190 | 1.520791 | 0.02004  |
| midnightb   | 1981  | TTGGAGA,MIR-515-5P,MIR-519E                  | 3  | 132  | 16121 | 71   | 5.202625 | 0.020041 |
| cyan        | 6560  | APRELIKOVA_BRCA1_TARGETS                     | 2  | 46   | 16207 | 77   | 9.177301 | 0.020043 |
| salmon      | 3046  | BIOCARTA_PROTEASOME_PATHWAY                  | 2  | 28   | 16225 | 127  | 9.14117  | 0.020055 |
| salmon      | 6777  | JOSEPH_RESPONSE_TO_SODIUM_BUTYRATE_UP        | 2  | 28   | 16225 | 127  | 9.14117  | 0.020055 |
| purple      | 9652  | GSE29617_DAY3_VS_DAY7_TIV_FLU_VACCINE_PBMC_  | 5  | 161  | 16092 | 157  | 3.214978 | 0.020075 |
| purple      | 1931  | V\$PR_02                                     | 4  | 107  | 16146 | 157  | 3.869992 | 0.020078 |
| purple      | 7871  | HOELZEL_NF1_TARGETS_UP                       | 4  | 107  | 16146 | 157  | 3.869992 | 0.020078 |
| brown       | 6166  | ROSS_AML_WITH_MLL_FUSIONS                    | 17 | 75   | 16178 | 2190 | 1.682198 | 0.020085 |
| pink        | 2098  | RAAGNYNNCTTY_UNKNOWN                         | 5  | 111  | 16142 | 228  | 3.21104  | 0.020089 |
| pink        | 3503  | MODULE_11                                    | 12 | 435  | 15818 | 228  | 1.966485 | 0.020094 |
| purple      | 2198  | TGCTGAY_UNKNOWN                              | 9  | 417  | 15836 | 157  | 2.234294 | 0.020095 |
| lightyellow | 1156  | CARBOXY_LYASE_ACTIVITY                       | 1  | 10   | 16243 | 33   | 49.25152 | 0.020125 |
| lightyellow | 2838  | KEGG_RENIN_ANGIOTENSIN_SYSTEM                | 1  | 10   | 16243 | 33   | 49.25152 | 0.020125 |
| lightyellow | 2961  | BIOCARTA_SKP2E2F_PATHWAY                     | 1  | 10   | 16243 | 33   | 49.25152 | 0.020125 |
| lightyellow | 4357  | REACTOME_ENDOGENOUS_STEROLS                  | 1  | 10   | 16243 | 33   | 49.25152 | 0.020125 |
| lightyellow | 4504  | REACTOME_FACILITATIVE_NA_INDEPENDENT_GLUCOSI | 1  | 10   | 16243 | 33   | 49.25152 | 0.020125 |
| lightyellow | 5169  | PASTURAL_RIZ1_TARGETS_UP                     | 1  | 10   | 16243 | 33   | 49.25152 | 0.020125 |
| yellow      | 5166  | KOKKINAKIS_METHIONINE_DEPRIVATION_48HR_DN    | 11 | 63   | 16190 | 1426 | 1.99006  | 0.020136 |
| midnightb   | 408   | REGULATION_OF_GROWTH                         | 2  | 50   | 16203 | 71   | 9.15662  | 0.020137 |
| magenta     | 7439  | MEISSNER_NPC_HCP_WITH_H3_UNMETHYLATED        | 9  | 392  | 15861 | 167  | 2.234465 | 0.020142 |
| turquoise   | 312   | CHROMATIN_ASSEMBLY                           | 8  | 15   | 16238 | 4169 | 2.07922  | 0.020149 |
| turquoise   | 339   | PEROXISOME_ORGANIZATION_AND_BIOGENESIS       | 8  | 15   | 16238 | 4169 | 2.07922  | 0.020149 |
| turquoise   | 3296  | chr2q23                                      | 8  | 15   | 16238 | 4169 | 2.07922  | 0.020149 |
| turquoise   | 4476  | REACTOME_CYCLIN_A_B1_ASSOCIATED_EVENTS_DURI  | 8  | 15   | 16238 | 4169 | 2.07922  | 0.020149 |
| turquoise   | 5210  | KOINUMA_COLON_CANCER_MSI_DN                  | 8  | 15   | 16238 | 4169 | 2.07922  | 0.020149 |
| turquoise   | 8096  | TIAN_BHLHA15_TARGETS                         | 8  | 15   | 16238 | 4169 | 2.07922  | 0.020149 |
| turquoise   | 1610  | V\$SREBP1_01                                 | 51 | 153  | 16100 | 4169 | 1.299512 | 0.020153 |
| brown       | 9933  | GSE37416_CTRL_VS_48H_F_TULARENSIS_LVS_NEUTRO | 37 | 196  | 16057 | 2190 | 1.40099  | 0.020189 |
| brown       | 10038 | GSE3982_MAC_VS_CENT_MEMORY_CD4_TCELL_UP      | 37 | 196  | 16057 | 2190 | 1.40099  | 0.020189 |
| brown       | 10209 | GSE7852_THYMUS_VS_FAT_TCONV_DN               | 37 | 196  | 16057 | 2190 | 1.40099  | 0.020189 |
| salmon      | 3715  | MODULE_243                                   | 3  | 74   | 16179 | 127  | 5.188232 | 0.020197 |
| blue        | 9681  | GSE29618_PRE_VS_DAY7_FLU_VACCINE_MONOCYTE_I  | 45 | 183  | 16070 | 2978 | 1.342055 | 0.0202   |
| turquoise   | 9781  | GSE339_EX_VIVO_VS_IN_CULTURE_CD4POS_DC_DN    | 60 | 184  | 16069 | 4169 | 1.271262 | 0.020206 |
| turquoise   | 9985  | GSE3982_EOSINOPHIL_VS_CENT_MEMORY_CD4_TCELL  | 60 | 184  | 16069 | 4169 | 1.271262 | 0.020206 |
| cyan        | 8189  | ZWANG_TRANSIENTLY_UP_BY_1ST_EGF_PULSE_ONLY   | 13 | 1472 | 14781 | 77   | 1.864139 | 0.02021  |
| turquoise   | 6790  | BILD_CTNNB1_ONCOGENIC_SIGNATURE              | 28 | 76   | 16177 | 4169 | 1.436303 | 0.020217 |
| purple      | 953   | INTERPHASE_OF_MITOTIC_CELL_CYCLE             | 3  | 60   | 16193 | 157  | 5.176115 | 0.020255 |
| purple      | 1151  | LYASE_ACTIVITY                               | 3  | 60   | 16193 | 157  | 5.176115 | 0.020255 |
| purple      | 1615  | CAGNYGKNAAA_UNKNOWN                          | 3  | 60   | 16193 | 157  | 5.176115 | 0.020255 |
| purple      | 4327  | REACTOME_RNA_POL_I_TRANSCRIPTION             | 3  | 60   | 16193 | 157  | 5.176115 | 0.020255 |
| purple      | 5224  | VANHARANTA_UTERINE_FIBROID_DN                | 3  | 60   | 16193 | 157  | 5.176115 | 0.020255 |
| purple      | 5716  | SHETH_LIVER_CANCER_VS_TXNIP_LOSS_PAM3        | 3  | 60   | 16193 | 157  | 5.176115 | 0.020255 |
| purple      | 6575  | GAJATE_RESPONSE_TO TRABECTEDIN_UP            | 3  | 60   | 16193 | 157  | 5.176115 | 0.020255 |
| red         | 181   | NUCLEAR_MEMBRANE                             | 5  | 49   | 16204 | 524  | 3.165018 | 0.020307 |
| grey60      | 459   | DEFENSE_RESPONSE                             | 3  | 215  | 16038 | 44   | 5.154228 | 0.020308 |
| grey60      | 1460  | V\$AP4_01                                    | 3  | 215  | 16038 | 44   | 5.154228 | 0.020308 |
| tan         | 2526  | GCM_ING1                                     | 3  | 65   | 16188 | 145  | 5.173369 | 0.020313 |
| tan         | 6720  | SESTO_RESPONSE_TO_UV_C7                      | 3  | 65   | 16188 | 145  | 5.173369 | 0.020313 |
| magenta     | 1385  | ION_CHANNEL_ACTIVITY                         | 4  | 101  | 16152 | 167  | 3.85439  | 0.02033  |
| blue        | 2612  | GNF2_APEX1                                   | 25 | 91   | 16162 | 2978 | 1.499365 | 0.02036  |
| turquoise   | 2550  | GCM_RAN                                      | 62 | 191  | 16062 | 4169 | 1.265494 | 0.020366 |
| turquoise   | 8888  | GSE17721_CTRL_VS_CPG_6H_BMDM_UP              | 62 | 191  | 16062 | 4169 | 1.265494 | 0.020366 |

|            |       |                                               |     |     |       |      |          |          |
|------------|-------|-----------------------------------------------|-----|-----|-------|------|----------|----------|
| turquoise  | 9069  | GSE17721_POLYIC_VS_GARDIQUIMOD_12H_BMDM_D     | 62  | 191 | 16062 | 4169 | 1.265494 | 0.020366 |
| turquoise  | 9222  | GSE18791_CTRL_VS_NEWCASTLE_VIRUS_DC_4H_UP     | 62  | 191 | 16062 | 4169 | 1.265494 | 0.020366 |
| pink       | 8269  | PRC2_SUZ12_UP.V1_DN                           | 6   | 152 | 16101 | 228  | 2.813885 | 0.020379 |
| red        | 8407  | GSE10239_NAIVE_VS_MEMORY_CD8_TCELL_DN         | 11  | 168 | 16085 | 524  | 2.030886 | 0.020391 |
| red        | 8871  | GSE17721_CTRL_VS_PAM3CSK4_4H_BMDM_DN          | 11  | 168 | 16085 | 524  | 2.030886 | 0.020391 |
| red        | 9872  | GSE360_L_MAJOR_VS_B_MALAYI_HIGH_DOSE_MAC_L    | 11  | 168 | 16085 | 524  | 2.030886 | 0.020391 |
| blue       | 8471  | GSE11864_CSF1_VS_CSF1_PAM3CYS_IN_MAC_DN       | 42  | 169 | 16084 | 2978 | 1.356349 | 0.020406 |
| blue       | 9833  | GSE360_L_DONOVANI_VS_T_GONDII_DC_DN           | 42  | 169 | 16084 | 2978 | 1.356349 | 0.020406 |
| salmon     | 6701  | XU_GH1_AUTOCRINE_TARGETS_UP                   | 5   | 200 | 16053 | 127  | 3.199409 | 0.020421 |
| salmon     | 9336  | GSE22886_NAIVE_BCELL_VS_BM_PLASMA_CELL_UP     | 5   | 200 | 16053 | 127  | 3.199409 | 0.020421 |
| salmon     | 9435  | GSE24634_NAIVE_CD4_TCELL_VS_DAY5_IL4_CONV_TR  | 5   | 200 | 16053 | 127  | 3.199409 | 0.020421 |
| salmon     | 9911  | GSE36476_CTRL_VS_TSST_ACT_40H_MEMORY_CD4_T    | 5   | 200 | 16053 | 127  | 3.199409 | 0.020421 |
| magenta    | 7415  | HAN_SATB1_TARGETS_DN                          | 9   | 393 | 15860 | 167  | 2.228779 | 0.020438 |
| magenta    | 3695  | MODULE_215                                    | 1   | 2   | 16251 | 167  | 48.66168 | 0.020445 |
| magenta    | 7218  | ALONSO_METASTASIS_EMT_DN                      | 1   | 2   | 16251 | 167  | 48.66168 | 0.020445 |
| red        | 1531  | V\$CEBPA_01                                   | 12  | 190 | 16063 | 524  | 1.95898  | 0.020448 |
| red        | 8492  | GSE12366_GC_BCELL_VS_PLASMA_CELL_UP           | 12  | 190 | 16063 | 524  | 1.95898  | 0.020448 |
| red        | 9010  | GSE17721_POLYIC_VS_CPG_6H_BMDM_UP             | 12  | 190 | 16063 | 524  | 1.95898  | 0.020448 |
| red        | 9266  | GSE20366_EX_VIVO_VS_DEC205_CONVERSION_NAIVE   | 12  | 190 | 16063 | 524  | 1.95898  | 0.020448 |
| red        | 9420  | GSE24142_EARLY_THYMIC_PROGENITOR_VS_DN2_THY   | 12  | 190 | 16063 | 524  | 1.95898  | 0.020448 |
| red        | 9908  | GSE36476_CTRL_VS_TSST_ACT_16H_MEMORY_CD4_T    | 12  | 190 | 16063 | 524  | 1.95898  | 0.020448 |
| red        | 10274 | GSE9988_ANTI_TREM1_VS_CTRL_TREATED_MONOCYT    | 12  | 190 | 16063 | 524  | 1.95898  | 0.020448 |
| turquoise  | 10188 | GSE7764_IL15_TREATED_VS_CTRL_NK_CELL_24H_UP   | 64  | 198 | 16055 | 4169 | 1.260133 | 0.020489 |
| lightgreen | 441   | REGULATION_OF_INTERFERON_GAMMA_BIOSYNTHEI     | 1   | 8   | 16245 | 42   | 48.37202 | 0.020491 |
| lightgreen | 3447  | ST_INTERFERON_GAMMA_PATHWAY                   | 1   | 8   | 16245 | 42   | 48.37202 | 0.020491 |
| lightgreen | 4837  | FOURNIER_ACINAR_DEVELOPMENT_LATE_UP           | 1   | 8   | 16245 | 42   | 48.37202 | 0.020491 |
| lightgreen | 4905  | PIEPOLI_LGI1_TARGETS_DN                       | 1   | 8   | 16245 | 42   | 48.37202 | 0.020491 |
| lightgreen | 6284  | ROETH_TERT_TARGETS_DN                         | 1   | 8   | 16245 | 42   | 48.37202 | 0.020491 |
| lightgreen | 7599  | SEIKE_LUNG_CANCER_POOR_SURVIVAL               | 1   | 8   | 16245 | 42   | 48.37202 | 0.020491 |
| lightgreen | 7833  | NOUSHMEHR_GBM_SOMATIC_MUTATED                 | 1   | 8   | 16245 | 42   | 48.37202 | 0.020491 |
| lightgreen | 8112  | PHONG_TNF_TARGETS_DN                          | 1   | 8   | 16245 | 42   | 48.37202 | 0.020491 |
| blue       | 6818  | CREIGHTON_ENDOCRINE_THERAPY_RESISTANCE_1      | 102 | 461 | 15792 | 2978 | 1.207558 | 0.020494 |
| brown      | 1409  | SH3_SH2_ADAPTOR_ACTIVITY                      | 11  | 42  | 16211 | 2190 | 1.943716 | 0.020504 |
| brown      | 2511  | GCM_DDX11                                     | 11  | 42  | 16211 | 2190 | 1.943716 | 0.020504 |
| brown      | 7319  | NUTT_GBM_VS_AO_GLIOMA_UP                      | 11  | 42  | 16211 | 2190 | 1.943716 | 0.020504 |
| black      | 9570  | GSE27786_BCELL_VS_ERYTHROBLAST_UP             | 8   | 194 | 16059 | 283  | 2.368293 | 0.020534 |
| black      | 10222 | GSE8868_SPLEEN_VS_INTESTINE_CD11B_POS_CD11C_I | 8   | 194 | 16059 | 283  | 2.368293 | 0.020534 |
| purple     | 5541  | HERNANDEZ_ABERRANT_MITOSIS_BY_DOCETACEL_2NI   | 2   | 23  | 16230 | 157  | 9.001939 | 0.020539 |
| purple     | 5581  | TERAMOTO_OPN_TARGETS_CLUSTER_6                | 2   | 23  | 16230 | 157  | 9.001939 | 0.020539 |
| purple     | 8054  | PEDERSEN_METASTASIS_BY_ERBB2_ISOFORM_6        | 2   | 23  | 16230 | 157  | 9.001939 | 0.020539 |
| magenta    | 2279  | CTAWWWATA_V\$RSRFC4_Q2                        | 7   | 267 | 15986 | 167  | 2.551549 | 0.020544 |
| grey60     | 1499  | V\$CP2_01                                     | 3   | 216 | 16037 | 44   | 5.130366 | 0.020556 |
| purple     | 1832  | V\$HNF3ALPHA_Q6                               | 5   | 162 | 16091 | 157  | 3.195132 | 0.020558 |
| purple     | 5016  | TAKEDA_TARGETS_OF_NUP98_HOXA9_FUSION_16D_L    | 5   | 162 | 16091 | 157  | 3.195132 | 0.020558 |
| blue       | 2757  | KEGG_INOSITOL_PHOSPHATE_METABOLISM            | 16  | 52  | 16201 | 2978 | 1.679289 | 0.020576 |
| turquoise  | 4728  | REACTOME_SIGNALING_BY_TGF_BETA_RECEPTOR_COI   | 23  | 60  | 16193 | 4169 | 1.494439 | 0.020595 |
| brown      | 8868  | GSE17721_CTRL_VS_PAM3CSK4_2H_BMDM_UP          | 36  | 190 | 16063 | 2190 | 1.406172 | 0.020601 |
| brown      | 9122  | GSE17721_ALL_VS_24H_PAM3CSK4_BMDM_UP          | 36  | 190 | 16063 | 2190 | 1.406172 | 0.020601 |
| brown      | 9835  | GSE360_L_DONOVANI_VS_B_MALAYI_HIGH_DOSE_DC    | 36  | 190 | 16063 | 2190 | 1.406172 | 0.020601 |
| brown      | 10026 | GSE3982_DC_VS_TH1_UP                          | 36  | 190 | 16063 | 2190 | 1.406172 | 0.020601 |
| magenta    | 2166  | CTTTGCA,MIR-527                               | 6   | 208 | 16045 | 167  | 2.807404 | 0.020606 |
| cyan       | 6807  | ZHONG_SECRETOME_OF_LUNG_CANCER_AND_FIBROB     | 3   | 123 | 16130 | 77   | 5.148242 | 0.020618 |
| cyan       | 8317  | RB_P130_DN.V1_DN                              | 3   | 123 | 16130 | 77   | 5.148242 | 0.020618 |
| turquoise  | 1459  | V\$CMYB_01                                    | 68  | 212 | 16041 | 4169 | 1.250474 | 0.020635 |
| lightcyan  | 2622  | GNF2_CD53                                     | 2   | 58  | 16195 | 62   | 9.039488 | 0.020638 |
| turquoise  | 1535  | V\$USF_01                                     | 74  | 233 | 16020 | 4169 | 1.238162 | 0.020646 |
| pink       | 798   | PROTEIN_AMINO_ACID_O_LINKED_GLYCOSYLATION     | 2   | 16  | 16237 | 228  | 8.910636 | 0.020658 |
| pink       | 3903  | MODULE_530                                    | 2   | 16  | 16237 | 228  | 8.910636 | 0.020658 |
| pink       | 4570  | REACTOME_ENERGY_DEPENDENT_REGULATION_OF_M     | 2   | 16  | 16237 | 228  | 8.910636 | 0.020658 |
| pink       | 6683  | KYNG_RESPONSE_TO_H2O2_VIA_ERCC6               | 2   | 16  | 16237 | 228  | 8.910636 | 0.020658 |

|            |                                                   |    |     |       |      |          |          |
|------------|---------------------------------------------------|----|-----|-------|------|----------|----------|
| pink       | 7631 STEIN_ESTROGEN_RESPONSE_NOT_VIA_ESRRA        | 2  | 16  | 16237 | 228  | 8.910636 | 0.020658 |
| pink       | 8343 SINGH_KRAS_DEPENDENCY_SIGNATURE_             | 2  | 16  | 16237 | 228  | 8.910636 | 0.020658 |
| black      | 5501 SCHLOSSER_SERUM_RESPONSE_UP                  | 6  | 123 | 16130 | 283  | 2.801517 | 0.020677 |
| lightgreen | 3587 MODULE_99                                    | 3  | 227 | 16026 | 42   | 5.114223 | 0.02069  |
| purple     | 2067 CCTGTGA,MIR-513                              | 4  | 108 | 16145 | 157  | 3.834159 | 0.020698 |
| purple     | 3773 MODULE_321                                   | 4  | 108 | 16145 | 157  | 3.834159 | 0.020698 |
| tan        | 1009 CHROMATIN_ASSEMBLY_OR_DISASSEMBLY            | 2  | 25  | 16228 | 145  | 8.967172 | 0.020735 |
| tan        | 3163 chr4q35                                      | 2  | 25  | 16228 | 145  | 8.967172 | 0.020735 |
| tan        | 7261 BOYLAN_MULTIPLE_MYELOMA_D_CLUSTER_UP         | 2  | 25  | 16228 | 145  | 8.967172 | 0.020735 |
| tan        | 8347 STK33_SKM_DN                                 | 6  | 240 | 16013 | 145  | 2.802241 | 0.020735 |
| red        | 6770 MAHAJAN_RESPONSE_TO_IL1A_UP                  | 6  | 67  | 16186 | 524  | 2.777658 | 0.020737 |
| grey60     | 6186 SMITH_TERT_TARGETS_DN                        | 2  | 82  | 16171 | 44   | 9.009424 | 0.020742 |
| grey60     | 7917 ACOSTA_PROLIFERATION_INDEPENDENT_MYC_TARGET  | 2  | 82  | 16171 | 44   | 9.009424 | 0.020742 |
| yellow     | 7397 LEE_DIFFERENTIATING_T_LYMPHOCYTE             | 26 | 195 | 16058 | 1426 | 1.519682 | 0.020756 |
| greenyello | 10128 GSE6269_HEALTHY_VS_E_COLI_INF_PBMC_UP       | 5  | 170 | 16083 | 150  | 3.186863 | 0.020761 |
| brown      | 7043 MITSIADES_RESPONSE_TO_APLIDIN_UP             | 70 | 410 | 15843 | 2190 | 1.267079 | 0.02078  |
| brown      | 3365 chr17q21                                     | 42 | 228 | 16025 | 2190 | 1.367111 | 0.020783 |
| tan        | 10039 GSE3982_MAC_VS_CENT_MEMORY_CD4_TCELL_DN     | 5  | 176 | 16077 | 145  | 3.184365 | 0.02082  |
| tan        | 10090 GSE3982_CENT_MEMORY_CD4_TCELL_VS_NKCELL_UP  | 5  | 176 | 16077 | 145  | 3.184365 | 0.02082  |
| turquoise  | 2529 GCM_MAP4K4                                   | 55 | 167 | 16086 | 4169 | 1.283949 | 0.020824 |
| midnightb  | 9188 GSE17974_IL4_AND_ANTI_IL12_VS_UNTREATED_1H_A | 3  | 134 | 16119 | 71   | 5.124974 | 0.020845 |
| red        | 1303 PHOSPHORIC_DIESTER_HYDROLASE_ACTIVITY        | 4  | 33  | 16220 | 524  | 3.759658 | 0.020853 |
| red        | 2566 CAR_HPX                                      | 4  | 33  | 16220 | 524  | 3.759658 | 0.020853 |
| red        | 4040 PID_UPA_UPAR_PATHWAY                         | 4  | 33  | 16220 | 524  | 3.759658 | 0.020853 |
| red        | 7284 SPIRA_SMOKERS_LUNG_CANCER_UP                 | 4  | 33  | 16220 | 524  | 3.759658 | 0.020853 |
| red        | 7482 VALK_AML_CLUSTER_5                           | 4  | 33  | 16220 | 524  | 3.759658 | 0.020853 |
| cyan       | 2647 GNF2_HLA-C                                   | 2  | 47  | 16206 | 77   | 8.982039 | 0.02087  |
| cyan       | 7017 WORSCHER_TUMOR_REJECTION_UP                  | 2  | 47  | 16206 | 77   | 8.982039 | 0.02087  |
| purple     | 1790 V\$HNF4ALPHA_Q6                              | 6  | 222 | 16031 | 157  | 2.7979   | 0.0209   |
| green      | 3396 chr6p22                                      | 11 | 69  | 16184 | 1305 | 1.985485 | 0.020919 |
| salmon     | 7739 YAO_TEMPORAL_RESPONSE_TO_PROGESTERONE_CLU:   | 3  | 75  | 16178 | 127  | 5.119055 | 0.020921 |
| magenta    | 6855 GAVIN_FOXP3_TARGETS_CLUSTER_P3               | 5  | 153 | 16100 | 167  | 3.180502 | 0.020922 |
| magenta    | 9698 GSE29618_PRE_VS_DAY7_POST_LAIV_FLU_VACCINE_M | 5  | 153 | 16100 | 167  | 3.180502 | 0.020922 |
| red        | 7349 RUTELLA_RESPONSE_TO_HGF_UP                   | 21 | 402 | 15851 | 524  | 1.6203   | 0.020949 |
| brown      | 2507 GCM_CRKL                                     | 15 | 64  | 16189 | 2190 | 1.739405 | 0.020952 |
| brown      | 4074 PID_BETACATENIN_NUC_PATHWAY                  | 15 | 64  | 16189 | 2190 | 1.739405 | 0.020952 |
| brown      | 6091 BYSTRYKH_HEMATOPOIESIS_STEM_CELL_AND_BRAIN_  | 15 | 64  | 16189 | 2190 | 1.739405 | 0.020952 |
| brown      | 7998 DUAN_PRDM5_TARGETS                           | 15 | 64  | 16189 | 2190 | 1.739405 | 0.020952 |
| pink       | 9002 GSE17721_POLYIC_VS_CPG_0.5H_BMDM_UP          | 6  | 153 | 16100 | 228  | 2.795494 | 0.020971 |
| turquoise  | 6416 IVANOVA_HEMATOPOIESIS_MATURE_CELL            | 87 | 279 | 15974 | 4169 | 1.215673 | 0.020989 |
| yellow     | 5936 AMIT_EGF_RESPONSE_120_MCF10A                 | 8  | 40  | 16213 | 1426 | 2.279523 | 0.020995 |
| lightcyan  | 5932 AMIT_EGF_RESPONSE_480_HEL4                   | 3  | 154 | 16099 | 62   | 5.106724 | 0.020995 |
| lightcyan  | 8750 GSE15659_NAIVE_CD4_TCELL_VS_ACTIVATED_TREG_U | 3  | 154 | 16099 | 62   | 5.106724 | 0.020995 |
| magenta    | 7012 AMBROSINI_FLAVOPIRIDOL_TREATMENT_TP53        | 4  | 102 | 16151 | 167  | 3.816602 | 0.020996 |
| black      | 3969 PID_FRA_PATHWAY                              | 3  | 34  | 16219 | 283  | 5.06745  | 0.020996 |
| salmon     | 2300 MORF_BUB3                                    | 6  | 275 | 15978 | 127  | 2.792212 | 0.020997 |
| blue       | 8641 GSE14308_TH1_VS_NAIVE_CD4_TCELL_DN           | 43 | 174 | 16079 | 2978 | 1.348739 | 0.021    |
| brown      | 8587 GSE13485_DAY1_VS_DAY21_YF17D_VACCINE_PBMC_L  | 35 | 184 | 16069 | 2190 | 1.411691 | 0.021009 |
| brown      | 8907 GSE17721_CTRL_VS_GARDIQUIMOD_8H_BMDM_DN      | 35 | 184 | 16069 | 2190 | 1.411691 | 0.021009 |
| brown      | 8944 GSE17721_POLYIC_VS_PAM3CSK4_16H_BMDM_UP      | 35 | 184 | 16069 | 2190 | 1.411691 | 0.021009 |
| brown      | 8957 GSE17721_PAM3CSK4_VS_CPG_6H_BMDM_DN          | 35 | 184 | 16069 | 2190 | 1.411691 | 0.021009 |
| brown      | 7934 BRUINS_UVC_RESPONSE_VIA_TP53_GROUP_B         | 79 | 470 | 15783 | 2190 | 1.247437 | 0.021028 |
| purple     | 2023 GTATTAT,MIR-369-3P                           | 5  | 163 | 16090 | 157  | 3.17553  | 0.021049 |
| yellow     | 6223 PENG_RAPAMYCIN_RESPONSE_UP                   | 25 | 186 | 16067 | 1426 | 1.531938 | 0.02105  |
| yellow     | 8634 GSE14308_TH2_VS_INDUCED_TREG_UP              | 25 | 186 | 16067 | 1426 | 1.531938 | 0.02105  |
| yellow     | 8649 GSE14308_TH17_VS_INDUCED_TREG_DN             | 25 | 186 | 16067 | 1426 | 1.531938 | 0.02105  |
| pink       | 707 MACROMOLECULE_BIOSYNTHETIC_PROCESS            | 9  | 289 | 15964 | 228  | 2.219951 | 0.021077 |
| turquoise  | 5259 OUELLET_OVARIAN_CANCER_INVASIVE_VS_LMP_UP    | 40 | 116 | 16137 | 4169 | 1.344323 | 0.02108  |
| blue       | 6567 BROWNE_HCMV_INFECTION_14HR_UP                | 37 | 146 | 16107 | 2978 | 1.383113 | 0.021098 |
| black      | 9893 GSE36392_TYPE_2_MYELOID_VS_MAC_IL25_TREATED_ | 8  | 195 | 16058 | 283  | 2.356148 | 0.021102 |



|            |                                                     |    |     |       |      |          |          |
|------------|-----------------------------------------------------|----|-----|-------|------|----------|----------|
| red        | 8348 STK33_SKM_UP                                   | 15 | 259 | 15994 | 524  | 1.796362 | 0.021108 |
| purple     | 2901 KEGG_ARRHYTHMOGENIC_RIGHT_VENTRICULAR_CARD     | 3  | 61  | 16192 | 157  | 5.09126  | 0.021156 |
| purple     | 6098 JECHLINGER_EPITHELIAL_TO_MESENCHYMAL_TRANSIT   | 3  | 61  | 16192 | 157  | 5.09126  | 0.021156 |
| purple     | 6165 JECHLINGER_EPITHELIAL_TO_MESENCHYMAL_TRANSIT   | 3  | 61  | 16192 | 157  | 5.09126  | 0.021156 |
| purple     | 6775 WESTON_VEGFA_TARGETS_3HR                       | 3  | 61  | 16192 | 157  | 5.09126  | 0.021156 |
| purple     | 7609 FONTAINE_FOLLICULAR_THYROID_ADENOMA_DN         | 3  | 61  | 16192 | 157  | 5.09126  | 0.021156 |
| purple     | 7613 FONTAINE_PAPILLARY_THYROID_CARCINOMA_DN        | 3  | 61  | 16192 | 157  | 5.09126  | 0.021156 |
| blue       | 5039 MULLIGHAN_MLL_SIGNATURE_2_DN                   | 61 | 260 | 15993 | 2978 | 1.280458 | 0.021158 |
| turquoise  | 2077 MCAATNNNNNGCG_UNKNOWN                          | 27 | 73  | 16180 | 4169 | 1.441925 | 0.021158 |
| turquoise  | 2400 MORF_HEAB                                      | 27 | 73  | 16180 | 4169 | 1.441925 | 0.021158 |
| red        | 1726 V\$GATA6_01                                    | 12 | 191 | 16062 | 524  | 1.948723 | 0.021207 |
| red        | 9580 GSE27786_CD4_TCELL_VS_NKTCELL_UP               | 12 | 191 | 16062 | 524  | 1.948723 | 0.021207 |
| red        | 10194 GSE7852_TREG_VS_TCONV_THYMUS_UP               | 12 | 191 | 16062 | 524  | 1.948723 | 0.021207 |
| blue       | 7764 GERHOLD_RESPONSE_TO_TZD_UP                     | 3  | 4   | 16249 | 2978 | 4.093267 | 0.02121  |
| blue       | 9067 GSE17721_POLYIC_VS_GARDIQUIMOD_8H_BMDM_DN      | 47 | 193 | 16060 | 2978 | 1.329075 | 0.021216 |
| blue       | 9542 GSE27786_LSK_VS_NEUTROPHIL_UP                  | 47 | 193 | 16060 | 2978 | 1.329075 | 0.021216 |
| blue       | 10049 GSE3982_NEUTROPHIL_VS_BASOPHIL_DN             | 47 | 193 | 16060 | 2978 | 1.329075 | 0.021216 |
| grey60     | 6290 FERRANDO_T_ALL_WITH_MLL_ENL_FUSION_DN          | 2  | 83  | 16170 | 44   | 8.900876 | 0.021218 |
| grey60     | 8351 KRAS.AMP.LUNG_UP.V1_UP                         | 2  | 83  | 16170 | 44   | 8.900876 | 0.021218 |
| turquoise  | 1122 LIGASE_ACTIVITY                                | 34 | 96  | 16157 | 4169 | 1.380732 | 0.02123  |
| turquoise  | 1193 TRANSFERASE_ACTIVITY_TRANSFERRING_GLYCOSYL_GI  | 34 | 96  | 16157 | 4169 | 1.380732 | 0.02123  |
| greenyello | 1809 V\$TCF4_Q5                                     | 5  | 171 | 16082 | 150  | 3.168226 | 0.021232 |
| greenyello | 5395 PEREZ_TP53_AND_TP63_TARGETS                    | 5  | 171 | 16082 | 150  | 3.168226 | 0.021232 |
| greenyello | 9400 GSE22886_UNSTIM_VS_IL15_STIM_NKCELL_UP         | 5  | 171 | 16082 | 150  | 3.168226 | 0.021232 |
| salmon     | 5570 PATIL_LIVER_CANCER                             | 11 | 700 | 15553 | 127  | 2.011057 | 0.021236 |
| blue       | 7066 SMID_BREAST_CANCER_NORMAL_LIKE_UP              | 91 | 407 | 15846 | 2978 | 1.22027  | 0.021258 |
| brown      | 1963 AAAGGGA,MIR-204,MIR-211                        | 38 | 203 | 16050 | 2190 | 1.389239 | 0.021263 |
| green      | 391 RESPONSE_TO_TOXIN                               | 3  | 8   | 16245 | 1305 | 4.670402 | 0.021277 |
| blue       | 105 OUTER_MEMBRANE                                  | 9  | 24  | 16229 | 2978 | 2.046634 | 0.021284 |
| blue       | 290 CHROMATIN_REMODELING                            | 9  | 24  | 16229 | 2978 | 2.046634 | 0.021284 |
| blue       | 3483 ST_INTERLEUKIN_4_PATHWAY                       | 9  | 24  | 16229 | 2978 | 2.046634 | 0.021284 |
| blue       | 3640 MODULE_155                                     | 9  | 24  | 16229 | 2978 | 2.046634 | 0.021284 |
| brown      | 1762 V\$STAT6_02                                    | 41 | 222 | 16031 | 2190 | 1.37063  | 0.021291 |
| greenyello | 6844 LEIN_OLIGODENDROCYTE_MARKERS                   | 3  | 64  | 16189 | 150  | 5.079063 | 0.021307 |
| grey60     | 1819 V\$HEB_Q6                                      | 3  | 219 | 16034 | 44   | 5.060087 | 0.021309 |
| lightcyan  | 4038 PID_AP1_PATHWAY                                | 2  | 59  | 16194 | 62   | 8.886277 | 0.02131  |
| lightcyan  | 6111 SHEPARD_BMYB_TARGETS                           | 2  | 59  | 16194 | 62   | 8.886277 | 0.02131  |
| lightcyan  | 6339 PETROVA_PROX1_TARGETS_DN                       | 2  | 59  | 16194 | 62   | 8.886277 | 0.02131  |
| pink       | 8724 GSE14769_UNSTIM_VS_240MIN_LPS_BMDM_UP          | 7  | 197 | 16056 | 228  | 2.532973 | 0.021325 |
| purple     | 4417 REACTOME_SIGNALING_BY_PDGF                     | 4  | 109 | 16144 | 157  | 3.798983 | 0.021329 |
| blue       | 3279 chr7p22                                        | 19 | 65  | 16188 | 2978 | 1.595325 | 0.021369 |
| blue       | 2198 TGCTGAY_UNKNOWN                                | 93 | 417 | 15836 | 2978 | 1.217183 | 0.02137  |
| cyan       | 7158 WEST_ADRENOCORTICAL_TUMOR_DN                   | 6  | 458 | 15795 | 77   | 2.765213 | 0.021381 |
| turquoise  | 416 CELLULAR_PROTEIN_CATABOLIC_PROCESS              | 22 | 57  | 16196 | 4169 | 1.504698 | 0.021385 |
| turquoise  | 2853 KEGG_LONG_TERM_POTENTIATION                    | 22 | 57  | 16196 | 4169 | 1.504698 | 0.021385 |
| turquoise  | 6129 PEART_HDAC_PROLIFERATION_CLUSTER_UP            | 22 | 57  | 16196 | 4169 | 1.504698 | 0.021385 |
| yellow     | 6556 BURTON_ADIPOGENESIS_5                          | 18 | 123 | 16130 | 1426 | 1.667944 | 0.021388 |
| brown      | 7744 YAO_TEMPORAL_RESPONSE_TO_PROGESTERONE_CLU!     | 34 | 178 | 16075 | 2190 | 1.417582 | 0.021409 |
| brown      | 8324 RPS14_DN.V1_UP                                 | 34 | 178 | 16075 | 2190 | 1.417582 | 0.021409 |
| brown      | 8901 GSE17721_CTRL_VS_GARDIQUIMOD_2H_BMDM_DN        | 34 | 178 | 16075 | 2190 | 1.417582 | 0.021409 |
| brown      | 9148 GSE17721_12H_VS_24H_GARDIQUIMOD_BMDM_UP        | 34 | 178 | 16075 | 2190 | 1.417582 | 0.021409 |
| brown      | 9817 GSE360_DC_VS_MAC_DN                            | 34 | 178 | 16075 | 2190 | 1.417582 | 0.021409 |
| brown      | 10120 GSE39820_TGFBETA1_VS_TGFBETA3_IN_IL6_IL23A_TR | 34 | 178 | 16075 | 2190 | 1.417582 | 0.021409 |
| yellow     | 8010 VANLOO_SP3_TARGETS_DN                          | 13 | 80  | 16173 | 1426 | 1.852113 | 0.021415 |
| black      | 6725 BANDRES_RESPONSE_TO_CARMUSTIN_MGMT_48HR_I      | 6  | 124 | 16129 | 283  | 2.778924 | 0.021422 |
| brown      | 2290 GCCATNTTG_V\$YY1_Q6                            | 69 | 404 | 15849 | 2190 | 1.267527 | 0.021427 |
| cyan       | 7648 HOSHIDA_LIVER_CANCER_SUBCLASS_S1               | 4  | 223 | 16030 | 77   | 3.786151 | 0.021427 |
| salmon     | 2791 KEGG_RNA_POLYMERASE                            | 2  | 29  | 16224 | 127  | 8.825957 | 0.021431 |
| salmon     | 4099 PID_BARD1PATHWAY                               | 2  | 29  | 16224 | 127  | 8.825957 | 0.021431 |
| black      | 8326 IL15_UP.V1_UP                                  | 7  | 159 | 16094 | 283  | 2.528413 | 0.021447 |

|            |                                                   |     |      |       |      |          |          |
|------------|---------------------------------------------------|-----|------|-------|------|----------|----------|
| magenta    | 8352 KRAS.DF.V1_DN                                | 5   | 154  | 16099 | 167  | 3.159849 | 0.02145  |
| grey60     | 2998 BIOCARTA_IL5_PATHWAY                         | 1   | 8    | 16245 | 44   | 46.1733  | 0.021458 |
| grey60     | 4773 REACTOME_TRYPTOPHAN_CATABOLISM               | 1   | 8    | 16245 | 44   | 46.1733  | 0.021458 |
| grey60     | 6061 LEI_HOXC8_TARGETS_UP                         | 1   | 8    | 16245 | 44   | 46.1733  | 0.021458 |
| grey60     | 6197 BYSTRYKH_HEMATOPOIESIS_STEM_CELL_FLI1        | 1   | 8    | 16245 | 44   | 46.1733  | 0.021458 |
| grey60     | 7799 HOFFMAN_CLOCK_TARGETS_DN                     | 1   | 8    | 16245 | 44   | 46.1733  | 0.021458 |
| greenyello | 1642 V\$AML1_01                                   | 6   | 234  | 16019 | 150  | 2.778291 | 0.021535 |
| greenyello | 1854 V\$AML1_Q6                                   | 6   | 234  | 16019 | 150  | 2.778291 | 0.021535 |
| green      | 6766 URS_ADIPOCYTE_DIFFERENTIATION_DN             | 6   | 28   | 16225 | 1305 | 2.668801 | 0.021538 |
| purple     | 3419 chr12p13                                     | 5   | 164  | 16089 | 157  | 3.156167 | 0.021547 |
| purple     | 3791 MODULE_342                                   | 5   | 164  | 16089 | 157  | 3.156167 | 0.021547 |
| purple     | 10098 GSE3982_NKCELL_VS_TH2_UP                    | 5   | 164  | 16089 | 157  | 3.156167 | 0.021547 |
| green      | 1404 AMINE_BINDING                                | 4   | 14   | 16239 | 1305 | 3.558402 | 0.021563 |
| green      | 3765 MODULE_311                                   | 4   | 14   | 16239 | 1305 | 3.558402 | 0.021563 |
| green      | 4428 REACTOME_AMINE_LIGAND_BINDING_RECEPTORS      | 4   | 14   | 16239 | 1305 | 3.558402 | 0.021563 |
| green      | 7841 STAMBOLSKY_BOUND_BY_MUTATED_TP53             | 4   | 14   | 16239 | 1305 | 3.558402 | 0.021563 |
| brown      | 1417 CALMODULIN_BINDING                           | 7   | 22   | 16231 | 2190 | 2.361374 | 0.021568 |
| brown      | 3888 MODULE_500                                   | 7   | 22   | 16231 | 2190 | 2.361374 | 0.021568 |
| brown      | 6150 MAGRANGEAS_MULTIPLE_MYELOMA_IGG_VS_IGA_DN    | 7   | 22   | 16231 | 2190 | 2.361374 | 0.021568 |
| pink       | 5932 AMIT_EGF_RESPONSE_480_HELA                   | 6   | 154  | 16099 | 228  | 2.777341 | 0.021575 |
| turquoise  | 8512 GSE12845_IGD_NEG_BLOOD_VS_NAIVE_TONSIL_BCELL | 63  | 195  | 16058 | 4169 | 1.259527 | 0.021576 |
| turquoise  | 9397 GSE22886_NAIVE_CD4_TCELL_VS_48H_ACT_TH2_DN   | 63  | 195  | 16058 | 4169 | 1.259527 | 0.021576 |
| purple     | 5089 KINSEY_TARGETS_OF_EWSR1_FLII_FUSION_DN       | 7   | 287  | 15966 | 157  | 2.524934 | 0.021583 |
| purple     | 6282 LEI_MYB_TARGETS                              | 7   | 287  | 15966 | 157  | 2.524934 | 0.021583 |
| brown      | 6968 WALLACE_PROSTATE_CANCER_RACE_UP              | 48  | 267  | 15986 | 2190 | 1.334195 | 0.021622 |
| turquoise  | 997 RESPONSE_TO_DNA_DAMAGE_STIMULUS               | 52  | 157  | 16096 | 4169 | 1.291235 | 0.021626 |
| yellow     | 5237 GRAESSMANN_APOPTOSIS_BY_DOXORUBICIN_UP       | 113 | 1072 | 15181 | 1426 | 1.201428 | 0.02164  |
| midnightb  | 5578 TERAMOTO_OPN_TARGETS_CLUSTER_3               | 1   | 5    | 16248 | 71   | 45.7831  | 0.021655 |
| midnightb  | 5625 LI_WILMS_TUMOR_ANAPLASTIC_DN                 | 1   | 5    | 16248 | 71   | 45.7831  | 0.021655 |
| midnightb  | 7090 BASSO_HAIRY_CELL_LEUKEMIA_UP                 | 1   | 5    | 16248 | 71   | 45.7831  | 0.021655 |
| red        | 1898 V\$CEBP_Q2_01                                | 13  | 214  | 16039 | 524  | 1.884221 | 0.021657 |
| salmon     | 6790 BILD_CTNNB1_ONCOGENIC_SIGNATURE              | 3   | 76   | 16177 | 127  | 5.051699 | 0.021659 |
| magenta    | 8361 JAK2_DN.V1_UP                                | 4   | 103  | 16150 | 167  | 3.779548 | 0.021674 |
| midnightb  | 2620 GNF2_CD33                                    | 2   | 52   | 16201 | 71   | 8.804442 | 0.021676 |
| lightgreen | 7787 NIELSEN_GIST                                 | 2   | 88   | 16165 | 42   | 8.794913 | 0.02169  |
| blue       | 8572 GSE13484_UNSTIM_VS_YF17D_VACCINE_STIM_PBMC   | 48  | 198  | 16055 | 2978 | 1.323076 | 0.021695 |
| grey60     | 5025 HOEBEKE_LYMPHOID_STEM_CELL_DN                | 2   | 84   | 16169 | 44   | 8.794913 | 0.021698 |
| red        | 172 EXTRACELLULAR_SPACE                           | 10  | 148  | 16105 | 524  | 2.095755 | 0.021698 |
| cyan       | 2836 KEGG_COMPLEMENT_AND_COAGULATION_CASCADES     | 2   | 48   | 16205 | 77   | 8.794913 | 0.021712 |
| cyan       | 6006 NIKOLSKY_BREAST_CANCER_16Q24_AMPLICON        | 2   | 48   | 16205 | 77   | 8.794913 | 0.021712 |
| cyan       | 7282 VILIMAS_NOTCH1_TARGETS_UP                    | 2   | 48   | 16205 | 77   | 8.794913 | 0.021712 |
| brown      | 10265 GSE9650_EXHAUSTED_VS_MEMORY_CD8_TCELL_DN    | 37  | 197  | 16056 | 2190 | 1.393878 | 0.02173  |
| brown      | 298 NEGATIVE_REGULATION_OF_APOPTOSIS              | 27  | 135  | 16118 | 2190 | 1.484292 | 0.021757 |
| magenta    | 523 POSITIVE_REGULATION_OF_MULTICELLULAR_ORGANIS  | 3   | 58   | 16195 | 167  | 5.033967 | 0.021766 |
| magenta    | 578 LEUKOCYTE_ACTIVATION                          | 3   | 58   | 16195 | 167  | 5.033967 | 0.021766 |
| magenta    | 8321 CAHOY_NEURONAL                               | 3   | 58   | 16195 | 167  | 5.033967 | 0.021766 |
| purple     | 6415 BLALOCK_ALZHEIMERS_DISEASE_INCIPIENT_UP      | 8   | 354  | 15899 | 157  | 2.339487 | 0.021786 |
| red        | 7866 QI_HYPOXIA                                   | 9   | 127  | 16126 | 524  | 2.198068 | 0.021787 |
| brown      | 1630 V\$EGR2_01                                   | 33  | 172  | 16081 | 2190 | 1.423885 | 0.0218   |
| brown      | 5385 LASTOWSKA_NEUROBLASTOMA_COPY_NUMBER_UP       | 33  | 172  | 16081 | 2190 | 1.423885 | 0.0218   |
| purple     | 1322 RECEPTOR_ACTIVITY                            | 9   | 423  | 15830 | 157  | 2.202602 | 0.021804 |
| grey60     | 1836 V\$SF1_Q6                                    | 3   | 221  | 16032 | 44   | 5.014295 | 0.02182  |
| grey60     | 3343 chr11q13                                     | 3   | 221  | 16032 | 44   | 5.014295 | 0.02182  |
| pink       | 8838 GSE17721_CTRL_VS_LPS_4H_BMDM_UP              | 7   | 198  | 16055 | 228  | 2.52018  | 0.021853 |
| turquoise  | 8317 RB_P130_DN.V1_DN                             | 42  | 123  | 16130 | 4169 | 1.331208 | 0.021856 |
| brown      | 4197 REACTOME_SIGNALING_BY_EGFR_IN_CANCER         | 21  | 99   | 16154 | 2190 | 1.574249 | 0.021859 |
| brown      | 2244 SCGGAAGY_V\$ELK1_02                          | 180 | 1162 | 15091 | 2190 | 1.149624 | 0.021864 |
| red        | 854 REGULATION_OF_METABOLIC_PROCESS               | 33  | 708  | 15545 | 524  | 1.445716 | 0.021876 |
| brown      | 368 TRANSCRIPTION_DNA_DEPENDENT                   | 92  | 558  | 15695 | 2190 | 1.22361  | 0.02188  |
| blue       | 6389 FAELT_B_CLL_WITH_VH3_21_UP                   | 14  | 44   | 16209 | 2978 | 1.736538 | 0.02191  |

|             |       |                                               |    |     |       |      |          |          |
|-------------|-------|-----------------------------------------------|----|-----|-------|------|----------|----------|
| pink        | 6695  | JIANG_HYPOXIA_NORMAL                          | 9  | 291 | 15962 | 228  | 2.204693 | 0.021922 |
| turquoise   | 2545  | GCM_PTK2                                      | 47 | 140 | 16113 | 4169 | 1.308795 | 0.021923 |
| salmon      | 64    | ORGANELLE_LUMEN                               | 8  | 439 | 15814 | 127  | 2.332144 | 0.021937 |
| salmon      | 146   | MEMBRANE_ENCLOSED_LUMEN                       | 8  | 439 | 15814 | 127  | 2.332144 | 0.021937 |
| brown       | 6446  | RAMALHO_STEMNESS_DN                           | 16 | 70  | 16183 | 2190 | 1.696334 | 0.021943 |
| brown       | 7825  | RAGHAVACHARI_PLATELET_SPECIFIC_GENES          | 16 | 70  | 16183 | 2190 | 1.696334 | 0.021943 |
| turquoise   | 910   | MRNA_METABOLIC_PROCESS                        | 30 | 83  | 16170 | 4169 | 1.40911  | 0.021954 |
| cyan        | 4024  | PID_P53DOWNSTREAMPATHWAY                      | 3  | 126 | 16127 | 77   | 5.025665 | 0.021956 |
| purple      | 2008  | AGGGCAG,MIR-18A                               | 4  | 110 | 16143 | 157  | 3.764447 | 0.021973 |
| purple      | 8045  | SERVITJA_LIVER_HNF1A_TARGETS_UP               | 4  | 110 | 16143 | 157  | 3.764447 | 0.021973 |
| red         | 2752  | KEGG_GLYCOSAMINOGLYCAN_DEGRADATION            | 3  | 19  | 16234 | 524  | 4.897449 | 0.021982 |
| red         | 5282  | WANG_BARRETTES_ESOPHAGUS_DN                   | 3  | 19  | 16234 | 524  | 4.897449 | 0.021982 |
| red         | 5725  | TOMLINS_METASTASIS_DN                         | 3  | 19  | 16234 | 524  | 4.897449 | 0.021982 |
| red         | 6700  | SARTIPY_BLUNTED_BY_INSULIN_RESISTANCE_UP      | 3  | 19  | 16234 | 524  | 4.897449 | 0.021982 |
| red         | 7389  | HOFMANN_MYELODYSPLASTIC_SYNDROM_RISK_DN       | 3  | 19  | 16234 | 524  | 4.897449 | 0.021982 |
| red         | 8666  | GSE1432_1H_VS_24H_IFNG_MICROGLIA_UP           | 12 | 192 | 16061 | 524  | 1.938573 | 0.021987 |
| red         | 8928  | GSE17721_LPS_VS_POLYIC_24H_BMDM_UP            | 12 | 192 | 16061 | 524  | 1.938573 | 0.021987 |
| red         | 9445  | GSE24634_TREG_VS_TCONV_POST_DAY7_IL4_CONVERT  | 12 | 192 | 16061 | 524  | 1.938573 | 0.021987 |
| magenta     | 1685  | V\$RSRFC4_Q2                                  | 5  | 155 | 16098 | 167  | 3.139463 | 0.021987 |
| magenta     | 9790  | GSE34205_RSV_VS_FLU_INF_INFANT_PBMC_UP        | 5  | 155 | 16098 | 167  | 3.139463 | 0.021987 |
| lightcyan   | 6575  | GAJATE_RESPONSE_TO TRABECTEDIN_UP             | 2  | 60  | 16193 | 62   | 8.738172 | 0.021991 |
| salmon      | 4307  | REACTOME_PROCESSING_OF_CAPPED_INTRON_CONT/    | 4  | 136 | 16117 | 127  | 3.764011 | 0.021998 |
| yellow      | 9594  | GSE27786_CD8_TCELL_VS_NEUTROPHIL_UP           | 26 | 196 | 16057 | 1426 | 1.511929 | 0.022004 |
| yellow      | 10262 | GSE9650_EFFECTOR_VS_MEMORY_CD8_TCELL_UP       | 26 | 196 | 16057 | 1426 | 1.511929 | 0.022004 |
| red         | 5241  | GAUSSMANN_MLL_AF4_FUSION_TARGETS_A_UP         | 11 | 170 | 16083 | 524  | 2.006994 | 0.022039 |
| pink        | 5854  | RICKMAN_METASTASIS_DN                         | 8  | 244 | 16009 | 228  | 2.337216 | 0.022051 |
| black       | 4984  | GINESTIER_BREAST_CANCER_ZNF217_AMPLIFIED_DN   | 11 | 314 | 15939 | 283  | 2.011917 | 0.02206  |
| purple      | 3608  | MODULE_120                                    | 3  | 62  | 16191 | 157  | 5.009143 | 0.022077 |
| purple      | 3713  | MODULE_241                                    | 3  | 62  | 16191 | 157  | 5.009143 | 0.022077 |
| greenyello  | 1273  | PEPTIDE_RECEPTOR_ACTIVITY                     | 2  | 25  | 16228 | 150  | 8.668267 | 0.022091 |
| greenyello  | 3081  | BIOCARTA_NKT_PATHWAY                          | 2  | 25  | 16228 | 150  | 8.668267 | 0.022091 |
| brown       | 3746  | MODULE_287                                    | 9  | 32  | 16221 | 2190 | 2.087286 | 0.022097 |
| brown       | 3757  | MODULE_300                                    | 9  | 32  | 16221 | 2190 | 2.087286 | 0.022097 |
| brown       | 3954  | PID_HIF2PATHWAY                               | 9  | 32  | 16221 | 2190 | 2.087286 | 0.022097 |
| brown       | 4106  | PID_MAPKTRKPATHWAY                            | 9  | 32  | 16221 | 2190 | 2.087286 | 0.022097 |
| brown       | 4113  | PID_INTEGRIN_A4B1_PATHWAY                     | 9  | 32  | 16221 | 2190 | 2.087286 | 0.022097 |
| brown       | 5575  | WANG_METHYLATED_IN_BREAST_CANCER              | 9  | 32  | 16221 | 2190 | 2.087286 | 0.022097 |
| brown       | 5605  | HEIDENBLAD_AMPLICON_12P11_12_UP               | 9  | 32  | 16221 | 2190 | 2.087286 | 0.022097 |
| brown       | 6709  | SEMENZA_HIF1_TARGETS                          | 9  | 32  | 16221 | 2190 | 2.087286 | 0.022097 |
| yellow      | 4900  | PRAMOONJAGO_SOX4_TARGETS_UP                   | 9  | 48  | 16205 | 1426 | 2.137053 | 0.022114 |
| yellow      | 4901  | PRAMOONJAGO_SOX4_TARGETS_DN                   | 9  | 48  | 16205 | 1426 | 2.137053 | 0.022114 |
| lightyellow | 1170  | CARBONATE_DEHYDRATASE_ACTIVITY                | 1  | 11  | 16242 | 33   | 44.7741  | 0.022116 |
| lightyellow | 1217  | RNA_POLYMERASE_II_TRANSCRIPTION_FACTOR_ACTIV  | 1  | 11  | 16242 | 33   | 44.7741  | 0.022116 |
| lightyellow | 3114  | BIOCARTA_TRKA_PATHWAY                         | 1  | 11  | 16242 | 33   | 44.7741  | 0.022116 |
| lightyellow | 3506  | MODULE_14                                     | 1  | 11  | 16242 | 33   | 44.7741  | 0.022116 |
| lightyellow | 4143  | REACTOME_SYNTHESIS_OF_BILE_ACIDS_AND_BILE_SAI | 1  | 11  | 16242 | 33   | 44.7741  | 0.022116 |
| lightyellow | 4301  | REACTOME_RETROGRADE_NEUROTROPHIN_SIGNALLIN    | 1  | 11  | 16242 | 33   | 44.7741  | 0.022116 |
| lightyellow | 4904  | PIEPOLI_LGI1_TARGETS_UP                       | 1  | 11  | 16242 | 33   | 44.7741  | 0.022116 |
| lightyellow | 5119  | GRAHAM_CML_QUIESCENT_VS_CML_DIVIDING_DN       | 1  | 11  | 16242 | 33   | 44.7741  | 0.022116 |
| lightyellow | 5463  | MYLLYKANGAS_AMPLIFICATION_HOT_SPOT_24         | 1  | 11  | 16242 | 33   | 44.7741  | 0.022116 |
| lightyellow | 5921  | PETRETTO_BLOOD_PRESSURE_UP                    | 1  | 11  | 16242 | 33   | 44.7741  | 0.022116 |
| blue        | 2403  | MORF_IL13                                     | 45 | 184 | 16069 | 2978 | 1.334761 | 0.022122 |
| turquoise   | 2506  | GCM_CHUK                                      | 26 | 70  | 16183 | 4169 | 1.448028 | 0.022131 |
| red         | 3529  | MODULE_40                                     | 6  | 68  | 16185 | 524  | 2.73681  | 0.022147 |
| red         | 3980  | PID_CDC42_PATHWAY                             | 6  | 68  | 16185 | 524  | 2.73681  | 0.022147 |
| lightgreen  | 6765  | BURTON_ADIPOGENESIS_9                         | 2  | 89  | 16164 | 42   | 8.696094 | 0.022152 |
| lightgreen  | 6769  | BROWNE_HCMV_INFECTION_12HR_DN                 | 2  | 89  | 16164 | 42   | 8.696094 | 0.022152 |
| yellow      | 678   | REGULATION_OF_ACTION_POTENTIAL                | 4  | 13  | 16240 | 1426 | 3.506959 | 0.022154 |
| yellow      | 701   | G1_PHASE_OF_MITOTIC_CELL_CYCLE                | 4  | 13  | 16240 | 1426 | 3.506959 | 0.022154 |
| yellow      | 3517  | MODULE_25                                     | 4  | 13  | 16240 | 1426 | 3.506959 | 0.022154 |

|            |                                                      |    |      |       |      |          |          |
|------------|------------------------------------------------------|----|------|-------|------|----------|----------|
| yellow     | 3539 MODULE_50                                       | 4  | 13   | 16240 | 1426 | 3.506959 | 0.022154 |
| yellow     | 6146 DISTECHE_ESCAPED_FROM_X_INACTIVATION            | 4  | 13   | 16240 | 1426 | 3.506959 | 0.022154 |
| red        | 1623 V\$NKX25_01                                     | 7  | 87   | 16166 | 524  | 2.495635 | 0.022169 |
| brown      | 6086 GOLDRATH_HOMEOSTATIC_PROLIFERATION              | 32 | 166  | 16087 | 2190 | 1.430643 | 0.022179 |
| yellow     | 4352 REACTOME_RNA_POL_III_TRANSCRIPTION              | 7  | 33   | 16220 | 1426 | 2.417676 | 0.022179 |
| black      | 6000 NIKOLSKY_BREAST_CANCER_11Q12_Q14_AMPLICON       | 6  | 125  | 16128 | 283  | 2.756693 | 0.022186 |
| greenyello | 709 RESPONSE_TO_OTHER_ORGANISM                       | 3  | 65   | 16188 | 150  | 5.000923 | 0.02219  |
| greenyello | 6228 GOLDRATH_IMMUNE_MEMORY                          | 3  | 65   | 16188 | 150  | 5.000923 | 0.02219  |
| brown      | 8771 GSE15750_DAY6_VS_DAY10_EFF_CD8_TCELL_DN         | 36 | 191  | 16062 | 2190 | 1.398809 | 0.022195 |
| brown      | 9408 GSE24142_EARLY_THYMIC_PROGENITOR_VS_DN2_THY     | 36 | 191  | 16062 | 2190 | 1.398809 | 0.022195 |
| greenyello | 9277 GSE20366_CD103_POS_VS_CD103_KLRG1_DP_TREG_D     | 5  | 173  | 16080 | 150  | 3.131599 | 0.022196 |
| tan        | 9305 GSE22045_TREG_VS_TCONV_DN                       | 5  | 179  | 16074 | 145  | 3.130996 | 0.022208 |
| tan        | 10130 GSE6269_HEALTHY_VS_STREP_AUREUS_INF_PBMC_UP    | 5  | 179  | 16074 | 145  | 3.130996 | 0.022208 |
| lightcyan  | 7418 CHEN_METABOLIC_SYNDROM_NETWORK                  | 9  | 1094 | 15159 | 62   | 2.156587 | 0.022225 |
| red        | 300 ESTABLISHMENT_OF_LOCALIZATION                    | 34 | 735  | 15518 | 524  | 1.434808 | 0.022242 |
| brown      | 2874 KEGG_PRION_DISEASES                             | 8  | 27   | 16226 | 2190 | 2.198951 | 0.022246 |
| brown      | 3900 MODULE_524                                      | 8  | 27   | 16226 | 2190 | 2.198951 | 0.022246 |
| brown      | 4209 REACTOME_PRE_NOTCH_TRANSCRIPTION_AND_TRAN       | 8  | 27   | 16226 | 2190 | 2.198951 | 0.022246 |
| brown      | 5028 AKL_HTLV1_INFECTIION_UP                         | 8  | 27   | 16226 | 2190 | 2.198951 | 0.022246 |
| blue       | 1392 MONOVALENT_INORGANIC_CATION_TRANSMEMBRAN        | 10 | 28   | 16225 | 2978 | 1.949175 | 0.022248 |
| purple     | 109 APICAL_JUNCTION_COMPLEX                          | 2  | 24   | 16229 | 157  | 8.626858 | 0.022266 |
| purple     | 198 APICOLATERAL_PLASMA_MEMBRANE                     | 2  | 24   | 16229 | 157  | 8.626858 | 0.022266 |
| purple     | 1099 OXIDOREDUCTASE_ACTIVITY_GO_0016705              | 2  | 24   | 16229 | 157  | 8.626858 | 0.022266 |
| purple     | 5256 BERENJENO_TRANSFORMED_BY_RHOA_FOREVER_DN        | 2  | 24   | 16229 | 157  | 8.626858 | 0.022266 |
| purple     | 6510 CUI_TCF21_TARGETS_DN                            | 2  | 24   | 16229 | 157  | 8.626858 | 0.022266 |
| purple     | 6674 SCHLINGEMANN_SKIN_CARCINOGENESIS_TPA_DN         | 2  | 24   | 16229 | 157  | 8.626858 | 0.022266 |
| black      | 10285 GSE9988_LPS_VS_VEHICLE_TREATED_MONOCYTE_DN     | 8  | 197  | 16056 | 283  | 2.332227 | 0.022271 |
| pink       | 5436 KLEIN_TARGETS_OF_BCR_ABL1_FUSION                | 3  | 43   | 16210 | 228  | 4.973378 | 0.022272 |
| pink       | 7015 ENGELMANN_CANCER_PROGENITORS_UP                 | 3  | 43   | 16210 | 228  | 4.973378 | 0.022272 |
| brown      | 565 CELL_RECOGNITION                                 | 5  | 13   | 16240 | 2190 | 2.854408 | 0.022294 |
| brown      | 678 REGULATION_OF_ACTION_POTENTIAL                   | 5  | 13   | 16240 | 2190 | 2.854408 | 0.022294 |
| brown      | 775 REGULATION_OF_CELL_MORPHOGENESIS                 | 5  | 13   | 16240 | 2190 | 2.854408 | 0.022294 |
| brown      | 3837 MODULE_412                                      | 5  | 13   | 16240 | 2190 | 2.854408 | 0.022294 |
| brown      | 4014 PID_IL5_PATHWAY                                 | 5  | 13   | 16240 | 2190 | 2.854408 | 0.022294 |
| brown      | 4156 REACTOME_SPRY_REGULATION_OF_FGF_SIGNALING       | 5  | 13   | 16240 | 2190 | 2.854408 | 0.022294 |
| brown      | 7316 MARTINELLI_IMMATURE_NEUTROPHIL_DN               | 5  | 13   | 16240 | 2190 | 2.854408 | 0.022294 |
| brown      | 7665 GUTIERREZ_WALDENSTROEMS_MACROGLOBULINEMIA       | 5  | 13   | 16240 | 2190 | 2.854408 | 0.022294 |
| turquoise  | 1593 ATGGYGGA_UNKNOWN                                | 33 | 93   | 16160 | 4169 | 1.383352 | 0.02233  |
| turquoise  | 2305 MORF_ERCC2                                      | 33 | 93   | 16160 | 4169 | 1.383352 | 0.02233  |
| yellow     | 10111 GSE39820_CTRL_VS_TGFBETA3_IL6_IL23A_CD4_TCELL_ | 25 | 187  | 16066 | 1426 | 1.523745 | 0.022346 |
| green      | 1914 V\$AP4_Q6_01                                    | 25 | 204  | 16049 | 1305 | 1.526275 | 0.022347 |
| turquoise  | 101 VACUOLAR_PART                                    | 6  | 10   | 16243 | 4169 | 2.339122 | 0.022349 |
| turquoise  | 123 LYSOSOMAL_MEMBRANE                               | 6  | 10   | 16243 | 4169 | 2.339122 | 0.022349 |
| turquoise  | 140 VACUOLAR_MEMBRANE                                | 6  | 10   | 16243 | 4169 | 2.339122 | 0.022349 |
| turquoise  | 1260 ACETYLGALACTOSAMINYLTRANSFERASE_ACTIVITY        | 6  | 10   | 16243 | 4169 | 2.339122 | 0.022349 |
| turquoise  | 1296 PROTEIN_DEACETYLASE_ACTIVITY                    | 6  | 10   | 16243 | 4169 | 2.339122 | 0.022349 |
| turquoise  | 1323 DEACETYLASE_ACTIVITY                            | 6  | 10   | 16243 | 4169 | 2.339122 | 0.022349 |
| turquoise  | 3088 BIOCARTA_PTC1_PATHWAY                           | 6  | 10   | 16243 | 4169 | 2.339122 | 0.022349 |
| turquoise  | 3328 chr4q34                                         | 6  | 10   | 16243 | 4169 | 2.339122 | 0.022349 |
| turquoise  | 5695 SEMBA_FHIT_TARGETS_DN                           | 6  | 10   | 16243 | 4169 | 2.339122 | 0.022349 |
| turquoise  | 7071 KUMAMOTO_RESPONSE_TO_NUTLIN_3A_DN               | 6  | 10   | 16243 | 4169 | 2.339122 | 0.022349 |
| magenta    | 1204 SUBSTRATE_SPECIFIC_CHANNEL_ACTIVITY             | 4  | 104  | 16149 | 167  | 3.743206 | 0.022366 |
| magenta    | 108 EXTRACELLULAR_REGION_PART                        | 6  | 212  | 16041 | 167  | 2.754435 | 0.022382 |
| magenta    | 1532 V\$CEBPB_02                                     | 6  | 212  | 16041 | 167  | 2.754435 | 0.022382 |
| blue       | 4463 REACTOME_UNFOLDED_PROTEIN_RESPONSE              | 21 | 74   | 16179 | 2978 | 1.548804 | 0.022386 |
| blue       | 5492 LUI_THYROID_CANCER_CLUSTER_2                    | 13 | 40   | 16213 | 2978 | 1.773749 | 0.022389 |
| lightgreen | 1642 V\$AML1_01                                      | 3  | 234  | 16019 | 42   | 4.961233 | 0.022394 |
| lightgreen | 1854 V\$AML1_Q6                                      | 3  | 234  | 16019 | 42   | 4.961233 | 0.022394 |
| red        | 1964 AATGTGA,MIR-23A,MIR-23B                         | 19 | 356  | 15897 | 524  | 1.655411 | 0.022397 |
| red        | 3542 MODULE_53                                       | 19 | 356  | 15897 | 524  | 1.655411 | 0.022397 |

|            |       |                                              |    |     |       |      |          |          |
|------------|-------|----------------------------------------------|----|-----|-------|------|----------|----------|
| green      | 7854  | VERHAAK_GLIOBLASTOMA_PRONEURAL               | 22 | 174 | 16079 | 1305 | 1.574695 | 0.022409 |
| turquoise  | 9779  | GSE339_CD8POS_VS_CD4CD8DN_DC_IN_CULTURE_DN   | 58 | 178 | 16075 | 4169 | 1.27031  | 0.022428 |
| green      | 9113  | GSE17721_12H_VS_24H_POLYIC_BMDM_DN           | 24 | 194 | 16059 | 1305 | 1.540751 | 0.022433 |
| purple     | 1964  | AATGTGA,MIR-23A,MIR-23B                      | 8  | 356 | 15897 | 157  | 2.326344 | 0.02244  |
| pink       | 3499  | MODULE_6                                     | 10 | 341 | 15912 | 228  | 2.090472 | 0.022442 |
| lightcyan  | 10144 | GSE6269_STREP_AUREUS_VS_STREP_PNEUMO_INF_PE  | 3  | 158 | 16095 | 62   | 4.97744  | 0.022445 |
| blue       | 1468  | V\$E2F_01                                    | 18 | 61  | 16192 | 2978 | 1.610466 | 0.022448 |
| blue       | 2880  | KEGG_COLORECTAL_CANCER                       | 18 | 61  | 16192 | 2978 | 1.610466 | 0.022448 |
| red        | 7331  | YOSHIMURA_MAPK8_TARGETS_UP                   | 42 | 947 | 15306 | 524  | 1.37563  | 0.022455 |
| midnightb  | 8171  | SMIRNOV_RESPONSE_TO_IR_2HR_DN                | 2  | 53  | 16200 | 71   | 8.63832  | 0.022463 |
| green      | 3981  | PID_RET_PATHWAY                              | 7  | 36  | 16217 | 1305 | 2.42169  | 0.0225   |
| greenyello | 276   | ENZYME_LINKED_RECEPTOR_PROTEIN_SIGNALING_PA1 | 4  | 116 | 16137 | 150  | 3.736322 | 0.022522 |
| greenyello | 7249  | VART_KSHV_INFECTION_ANGIOGENIC_MARKERS_DN    | 4  | 116 | 16137 | 150  | 3.736322 | 0.022522 |
| yellow     | 2584  | GNF2_CCNB2                                   | 10 | 56  | 16197 | 1426 | 2.035289 | 0.022526 |
| yellow     | 3796  | MODULE_350                                   | 10 | 56  | 16197 | 1426 | 2.035289 | 0.022526 |
| salmon     | 6383  | NOUZOVA_TRETINOIN_AND_H4_ACETYLTATION        | 4  | 137 | 16116 | 127  | 3.736537 | 0.022526 |
| purple     | 1635  | V\$TATA_01                                   | 5  | 166 | 16087 | 157  | 3.118141 | 0.022566 |
| cyan       | 4879  | TURASHVILI_BREAST_DUCTAL_CARCINOMA_VS_LOBUL  | 2  | 49  | 16204 | 77   | 8.615425 | 0.022567 |
| cyan       | 7873  | DEMAGALHAES_AGING_UP                         | 2  | 49  | 16204 | 77   | 8.615425 | 0.022567 |
| purple     | 1830  | V\$CACCCBINDINGFACTOR_Q6                     | 6  | 226 | 16027 | 157  | 2.748379 | 0.022582 |
| yellow     | 7205  | QI_PLASMACYTOMA_DN                           | 14 | 89  | 16164 | 1426 | 1.792883 | 0.022583 |
| turquoise  | 8911  | GSE17721_CTRL_VS_GARDIQUIMOD_24H_BMDM_DN     | 60 | 185 | 16068 | 4169 | 1.26439  | 0.022596 |
| turquoise  | 10123 | GSE5463_CTRL_VS_DEXAMETHASONE_TREATED_THYM   | 60 | 185 | 16068 | 4169 | 1.26439  | 0.022596 |
| purple     | 5283  | WANG_ESOPHAGUS_CANCER_VS_NORMAL_UP           | 4  | 111 | 16142 | 157  | 3.730533 | 0.022628 |
| lightgreen | 4565  | REACTOME_GPCR_LIGAND_BINDING                 | 3  | 235 | 16018 | 42   | 4.940122 | 0.022644 |
| yellow     | 8611  | GSE14000_TRANSLATED_RNA_VS_MRNA_4H_LPS_DC_   | 24 | 178 | 16075 | 1426 | 1.536757 | 0.022648 |
| yellow     | 9036  | GSE17721_PAM3CSK4_VS_GADIQUIMOD_24H_BMDM     | 24 | 178 | 16075 | 1426 | 1.536757 | 0.022648 |
| blue       | 4710  | REACTOME_INTERACTIONS_OF_VPR_WITH_HOST_CELI  | 11 | 32  | 16221 | 2978 | 1.876081 | 0.022656 |
| blue       | 5021  | BOGNI_TREATMENT_RELATED_MYELOID_LEUKEMIA_D   | 11 | 32  | 16221 | 2978 | 1.876081 | 0.022656 |
| brown      | 10218 | GSE8515_IL1_VS_IL6_4H_STIM_JMAC_UP           | 35 | 185 | 16068 | 2190 | 1.40406  | 0.022657 |
| blue       | 3423  | chr7q32                                      | 12 | 36  | 16217 | 2978 | 1.81923  | 0.022665 |
| grey60     | 669   | AMINO_ACID_AND_DERIVATIVE_METABOLIC_PROCESS  | 2  | 86  | 16167 | 44   | 8.590381 | 0.022673 |
| lightcyan  | 3165  | chr22q                                       | 1  | 6   | 16247 | 62   | 43.69086 | 0.022674 |
| lightcyan  | 7286  | LUDWICZEK_TREATING_IRON_OVERLOAD             | 1  | 6   | 16247 | 62   | 43.69086 | 0.022674 |
| lightcyan  | 7293  | SOUCEK_MYC_TARGETS                           | 1  | 6   | 16247 | 62   | 43.69086 | 0.022674 |
| black      | 7561  | YOSHIOKA_LIVER_CANCER_EARLY_RECURRENCE_UP    | 3  | 35  | 16218 | 283  | 4.922665 | 0.022676 |
| lightcyan  | 5022  | BILBAN_B_CLL_LPL_UP                          | 2  | 61  | 16192 | 62   | 8.594923 | 0.022682 |
| greenyello | 9563  | GSE27786_BCELL_VS_CD4_TCELL_DN               | 5  | 174 | 16079 | 150  | 3.113602 | 0.022688 |
| turquoise  | 8463  | GSE11864_UNTREATED_VS_CSF1_IFNG_IN_MAC_DN    | 62 | 192 | 16061 | 4169 | 1.258903 | 0.022723 |
| turquoise  | 8973  | GSE17721_CPG_VS_GARDIQUIMOD_4H_BMDM_DN       | 62 | 192 | 16061 | 4169 | 1.258903 | 0.022723 |
| brown      | 2903  | KEGG_VIRAL_MYOCARDITIS                       | 14 | 59  | 16194 | 2190 | 1.761025 | 0.022746 |
| brown      | 4173  | REACTOME_IMMUNOREGULATORY_INTERACTIONS_BE    | 14 | 59  | 16194 | 2190 | 1.761025 | 0.022746 |
| brown      | 4499  | REACTOME_SPHINGOLIPID_METABOLISM             | 14 | 59  | 16194 | 2190 | 1.761025 | 0.022746 |
| brown      | 7964  | BAKKER_FOXO3_TARGETS_UP                      | 14 | 59  | 16194 | 2190 | 1.761025 | 0.022746 |
| magenta    | 2903  | KEGG_VIRAL_MYOCARDITIS                       | 3  | 59  | 16194 | 167  | 4.948645 | 0.022763 |
| magenta    | 5586  | SEITZ_NEOPLASTIC_TRANSFORMATION_BY_8P_DELETI | 3  | 59  | 16194 | 167  | 4.948645 | 0.022763 |
| turquoise  | 99    | MEDIATOR_COMPLEX                             | 9  | 18  | 16235 | 4169 | 1.949268 | 0.022764 |
| turquoise  | 4528  | REACTOME_METAL_ION_SLC_TRANSPORTERS          | 9  | 18  | 16235 | 4169 | 1.949268 | 0.022764 |
| green      | 4759  | REACTOME_INWARDLY_RECTIFYING_K_CHANNELS      | 5  | 21  | 16232 | 1305 | 2.965335 | 0.022767 |
| purple     | 4957  | BASAKI_YBX1_TARGETS_DN                       | 8  | 357 | 15896 | 157  | 2.319827 | 0.022773 |
| brown      | 1200  | MOLECULAR_ADAPTOR_ACTIVITY                   | 12 | 48  | 16205 | 2190 | 1.855365 | 0.022785 |
| brown      | 3357  | chrxq13                                      | 12 | 48  | 16205 | 2190 | 1.855365 | 0.022785 |
| brown      | 4793  | REACTOME_APOPTOTIC_EXECUTION_PHASE           | 12 | 48  | 16205 | 2190 | 1.855365 | 0.022785 |
| red        | 8397  | KAECH_DAY15_EFF_VS_MEMORY_CD8_TCELL_DN       | 12 | 193 | 16060 | 524  | 1.928529 | 0.022788 |
| red        | 8457  | GSE11057_NAIVE_VS_MEMORY_CD4_TCELL_DN        | 12 | 193 | 16060 | 524  | 1.928529 | 0.022788 |
| red        | 8606  | GSE13738_TCR_VS_BYSTANDER_ACTIVATED_CD4_TCEI | 12 | 193 | 16060 | 524  | 1.928529 | 0.022788 |
| red        | 9049  | GSE17721_LPS_VS_CPG_8H_BMDM_DN               | 12 | 193 | 16060 | 524  | 1.928529 | 0.022788 |
| red        | 9789  | GSE34205_HEALTHY_VS_FLU_INF_INFANT_PBMC_DN   | 12 | 193 | 16060 | 524  | 1.928529 | 0.022788 |
| red        | 10062 | GSE3982_BCELL_VS_EFF_MEMORY_CD4_TCELL_UP     | 12 | 193 | 16060 | 524  | 1.928529 | 0.022788 |
| red        | 10167 | GSE7460_CTRL_VS_TGFB_TREATED_ACT_TCONV_DN    | 12 | 193 | 16060 | 524  | 1.928529 | 0.022788 |

|             |       |                                             |     |     |       |      |          |          |
|-------------|-------|---------------------------------------------|-----|-----|-------|------|----------|----------|
| red         | 10198 | GSE7852_LN_VS_THYMUS_TREG_UP                | 12  | 193 | 16060 | 524  | 1.928529 | 0.022788 |
| blue        | 7240  | GRESHOCK_CANCER_COPY_NUMBER_UP              | 68  | 295 | 15958 | 2978 | 1.258044 | 0.022793 |
| black       | 5400  | DACOSTA_UV_RESPONSE_VIA_ERCC3_TTD_UP        | 4   | 62  | 16191 | 283  | 3.705232 | 0.022808 |
| pink        | 8767  | GSE15750_WT_VS_TRAF6KO_DAY6_EFF_CD8_TCELL_D | 6   | 156 | 16097 | 228  | 2.741734 | 0.022817 |
| red         | 1324  | TRANSMEMBRANE_RECEPTOR_ACTIVITY             | 16  | 285 | 15968 | 524  | 1.741315 | 0.02282  |
| red         | 3519  | MODULE_27                                   | 16  | 285 | 15968 | 524  | 1.741315 | 0.02282  |
| salmon      | 7997  | KIM_TIAL1_TARGETS                           | 2   | 30  | 16223 | 127  | 8.531759 | 0.022846 |
| salmon      | 7237  | WANG_TUMOR_INVASIVENESS_DN                  | 5   | 206 | 16047 | 127  | 3.106223 | 0.022858 |
| turquoise   | 1841  | V\$E2F1DP1_01                               | 70  | 220 | 16033 | 4169 | 1.240444 | 0.022877 |
| turquoise   | 1842  | V\$E2F1DP2_01                               | 70  | 220 | 16033 | 4169 | 1.240444 | 0.022877 |
| turquoise   | 1844  | V\$E2F4DP2_01                               | 70  | 220 | 16033 | 4169 | 1.240444 | 0.022877 |
| red         | 7401  | SHEDDEN_LUNG_CANCER_GOOD_SURVIVAL_A4        | 11  | 171 | 16082 | 524  | 1.995257 | 0.022898 |
| red         | 9853  | GSE360_T_GONDII_VS_M_TUBERCULOSIS_DC_DN     | 11  | 171 | 16082 | 524  | 1.995257 | 0.022898 |
| yellow      | 9565  | GSE27786_BCELL_VS_CD8_TCELL_DN              | 23  | 169 | 16084 | 1426 | 1.551155 | 0.022902 |
| blue        | 36    | NUCLEAR_REPLICATION_FORK                    | 5   | 10  | 16243 | 2978 | 2.728845 | 0.02291  |
| blue        | 690   | RNA_3END_PROCESSING                         | 5   | 10  | 16243 | 2978 | 2.728845 | 0.02291  |
| blue        | 5789  | MANTOVANI_NFKB_TARGETS_DN                   | 5   | 10  | 16243 | 2978 | 2.728845 | 0.02291  |
| blue        | 7386  | HOFMANN_MYELODYSPLASTIC_SYNDROM_HIGH_RISK   | 5   | 10  | 16243 | 2978 | 2.728845 | 0.02291  |
| pink        | 1569  | V\$SRY_02                                   | 7   | 200 | 16053 | 228  | 2.494978 | 0.022935 |
| blue        | 5859  | SCHAEFFER_PROSTATE_DEVELOPMENT_6HR_DN       | 105 | 478 | 15775 | 2978 | 1.198865 | 0.022941 |
| salmon      | 6634  | RODWELL_AGING_KIDNEY_UP                     | 8   | 443 | 15810 | 127  | 2.311086 | 0.023007 |
| pink        | 8043  | SERVITJA_ISLET_HNF1A_TARGETS_UP             | 5   | 115 | 16138 | 228  | 3.099352 | 0.023012 |
| purple      | 2120  | RNCTGNYNRNCTGNY_UNKNOWN                     | 3   | 63  | 16190 | 157  | 4.929633 | 0.023021 |
| purple      | 3885  | MODULE_493                                  | 3   | 63  | 16190 | 157  | 4.929633 | 0.023021 |
| pink        | 7276  | TOOKER_GEMCITABINE_RESISTANCE_UP            | 4   | 77  | 16176 | 228  | 3.703121 | 0.023021 |
| pink        | 7935  | BRUINS_UVC_RESPONSE_VIA_TP53_GROUP_C        | 4   | 77  | 16176 | 228  | 3.703121 | 0.023021 |
| lightgreen  | 966   | INTERFERON_GAMMA_BIOSYNTHETIC_PROCESS       | 1   | 9   | 16244 | 42   | 42.99735 | 0.023024 |
| lightgreen  | 3923  | MODULE_575                                  | 1   | 9   | 16244 | 42   | 42.99735 | 0.023024 |
| lightgreen  | 4134  | REACTOME_GAP_JUNCTION_DEGRADATION           | 1   | 9   | 16244 | 42   | 42.99735 | 0.023024 |
| lightgreen  | 4341  | REACTOME_APOPTOTIC_CLEAVAGE_OF_CELL_ADHESIC | 1   | 9   | 16244 | 42   | 42.99735 | 0.023024 |
| lightgreen  | 5665  | SIMBULAN_UV_RESPONSE_NORMAL_UP              | 1   | 9   | 16244 | 42   | 42.99735 | 0.023024 |
| lightgreen  | 5696  | SHANK_TAL1_TARGETS_DN                       | 1   | 9   | 16244 | 42   | 42.99735 | 0.023024 |
| lightgreen  | 7021  | MASRI_RESISTANCE_TO_TAMOXIFEN_AND_AROMATA'  | 1   | 9   | 16244 | 42   | 42.99735 | 0.023024 |
| lightgreen  | 7952  | ZHU_SKIL_TARGETS_DN                         | 1   | 9   | 16244 | 42   | 42.99735 | 0.023024 |
| green       | 5085  | ZHOU_INFLAMMATORY_RESPONSE_FIMA_UP          | 45  | 414 | 15839 | 1305 | 1.35374  | 0.023032 |
| blue        | 6238  | SANSOM_APC_TARGETS_UP                       | 29  | 110 | 16143 | 2978 | 1.438845 | 0.023032 |
| cyan        | 7878  | DUTERTRE ESTRADIOL_RESPONSE_24HR_DN         | 6   | 466 | 15787 | 77   | 2.717741 | 0.023047 |
| red         | 2573  | GNF2_BNIP2                                  | 4   | 34  | 16219 | 524  | 3.649079 | 0.023048 |
| red         | 3179  | chr14q21                                    | 4   | 34  | 16219 | 524  | 3.649079 | 0.023048 |
| magenta     | 1059  | INTEGRIN_BINDING                            | 2   | 23  | 16230 | 167  | 8.4629   | 0.02305  |
| magenta     | 2949  | BIOCARTA_CTCF_PATHWAY                       | 2   | 23  | 16230 | 167  | 8.4629   | 0.02305  |
| magenta     | 6048  | CERVERA_SDHB_TARGETS_1_DN                   | 2   | 23  | 16230 | 167  | 8.4629   | 0.02305  |
| salmon      | 4691  | REACTOME_APOPTOSIS                          | 4   | 138 | 16115 | 127  | 3.70946  | 0.023062 |
| salmon      | 7853  | KIM_ALL_DISORDERS_DURATION_CORR_DN          | 4   | 138 | 16115 | 127  | 3.70946  | 0.023062 |
| green       | 7457  | LIU_VAV3_PROSTATE_CARCINOGENESIS_UP         | 11  | 70  | 16183 | 1305 | 1.957121 | 0.023081 |
| lightgreen  | 5076  | LEE_NEURAL_CREST_STEM_CELL_DN               | 2   | 91  | 16162 | 42   | 8.504971 | 0.02309  |
| lightgreen  | 8052  | PEDERSEN_METASTASIS_BY_ERBB2_ISOFORM_4      | 2   | 91  | 16162 | 42   | 8.504971 | 0.02309  |
| yellow      | 531   | CELL_CYCLE_PHASE                            | 22  | 160 | 16093 | 1426 | 1.567172 | 0.023099 |
| yellow      | 2427  | MORF_NPM1                                   | 22  | 160 | 16093 | 1426 | 1.567172 | 0.023099 |
| brown       | 8489  | GSE11924_TH1_VS_TH17_CD4_TCELL_DN           | 34  | 179 | 16074 | 2190 | 1.409663 | 0.023114 |
| turquoise   | 9652  | GSE29617_DAY3_VS_DAY7_TIV_FLU_VACCINE_PBMCC | 53  | 161 | 16092 | 4169 | 1.283369 | 0.023133 |
| turquoise   | 3763  | MODULE_308                                  | 25  | 67  | 16186 | 4169 | 1.454678 | 0.023136 |
| blue        | 8515  | GSE12845_IGD_NEG_BLOOD_VS_PRE_GC_TONSIL_BCE | 47  | 194 | 16059 | 2978 | 1.322224 | 0.02316  |
| green       | 8488  | GSE11924_TH1_VS_TH17_CD4_TCELL_UP           | 19  | 145 | 16108 | 1305 | 1.631957 | 0.023162 |
| lightyellow | 4831  | SCHUETZ_BREAST_CANCER_DUCTAL_INVASIVE_UP    | 3   | 303 | 15950 | 33   | 4.876388 | 0.023171 |
| greenyello  | 6361  | VERHAAK_AML_WITH_NPM1_MUTATED_DN            | 6   | 238 | 16015 | 150  | 2.731597 | 0.023172 |
| salmon      | 2372  | MORF_DAP                                    | 3   | 78  | 16175 | 127  | 4.922168 | 0.023178 |
| salmon      | 4434  | REACTOME_M_G1_TRANSITION                    | 3   | 78  | 16175 | 127  | 4.922168 | 0.023178 |
| salmon      | 6722  | JIANG_HYPOXIA_CANCER                        | 3   | 78  | 16175 | 127  | 4.922168 | 0.023178 |
| salmon      | 7990  | BILANGES_SERUM_SENSITIVE_GENES              | 3   | 78  | 16175 | 127  | 4.922168 | 0.023178 |

|            |                                                    |    |      |       |      |          |          |
|------------|----------------------------------------------------|----|------|-------|------|----------|----------|
| yellow     | 1834 V\$USF2_Q6                                    | 29 | 225  | 16028 | 1426 | 1.469026 | 0.023187 |
| greenyello | 9382 GSE22886_TH1_VS_TH2_12H_ACT_UP                | 5  | 175  | 16078 | 150  | 3.09581  | 0.023188 |
| pink       | 607 EXTRACELLULAR_STRUCTURE_ORGANIZATION_AND_BI    | 2  | 17   | 16236 | 228  | 8.386481 | 0.023199 |
| pink       | 4280 REACTOME_SYNTHESIS_OF_PC                      | 2  | 17   | 16236 | 228  | 8.386481 | 0.023199 |
| pink       | 4426 REACTOME_STRIATED_MUSCLE_CONTRACTION          | 2  | 17   | 16236 | 228  | 8.386481 | 0.023199 |
| pink       | 5939 AMIT_SERUM_RESPONSE_20_MCF10A                 | 2  | 17   | 16236 | 228  | 8.386481 | 0.023199 |
| pink       | 6277 ZHAN_MULTIPLE_MYELOMA_SPIKED                  | 2  | 17   | 16236 | 228  | 8.386481 | 0.023199 |
| pink       | 7564 MEISSNER_BRAIN_HCP_WITH_H3K4ME2               | 2  | 17   | 16236 | 228  | 8.386481 | 0.023199 |
| pink       | 7789 NIELSEN_LEIOMYOSARCOMA_DN                     | 2  | 17   | 16236 | 228  | 8.386481 | 0.023199 |
| brown      | 834 CARBOHYDRATE_METABOLIC_PROCESS                 | 29 | 148  | 16105 | 2190 | 1.454205 | 0.023211 |
| yellow     | 6599 BROWNE_HCMV_INFECTION_18HR_DN                 | 21 | 151  | 16102 | 1426 | 1.585099 | 0.023227 |
| blue       | 2429 MORF_PAPSS1                                   | 27 | 101  | 16152 | 2978 | 1.458986 | 0.023228 |
| blue       | 3336 chr22q12                                      | 25 | 92   | 16161 | 2978 | 1.483068 | 0.023228 |
| pink       | 8012 KOINUMA_TARGETS_OF_SMAD2_OR_SMAD3             | 18 | 768  | 15485 | 228  | 1.670744 | 0.023232 |
| red        | 5783 NUYTEN_NIPP1_TARGETS_DN                       | 36 | 790  | 15463 | 524  | 1.413441 | 0.02324  |
| green      | 3588 MODULE_100                                    | 46 | 425  | 15828 | 1305 | 1.348006 | 0.02324  |
| salmon     | 5708 CALVET_IRINOTECAN_SENSITIVE_VS_REVERTED_DN    | 1  | 3    | 16250 | 127  | 42.65879 | 0.023261 |
| salmon     | 7616 WEBER_METHYLATED_LCP_IN_FIBROBLAST_DN         | 1  | 3    | 16250 | 127  | 42.65879 | 0.023261 |
| yellow     | 6643 IVANOVA_HEMATOPOIESIS_INTERMEDIATE_PROGENIT   | 20 | 142  | 16111 | 1426 | 1.605298 | 0.023271 |
| salmon     | 5208 LINDGREN_BLADDER_CANCER_CLUSTER_3_DN          | 5  | 207  | 16046 | 127  | 3.091217 | 0.023282 |
| blue       | 3193 chr22q13                                      | 40 | 161  | 16092 | 2978 | 1.355948 | 0.023291 |
| greenyello | 6963 MASSARWEH_TAMOXIFEN_RESISTANCE_UP             | 10 | 523  | 15730 | 150  | 2.071765 | 0.023292 |
| purple     | 5647 DAIRKEE_TERT_TARGETS_DN                       | 4  | 112  | 16141 | 157  | 3.697225 | 0.023295 |
| purple     | 8184 ZWANG_CLASS_1_TRANSIENTLY_INDUCED_BY_EGF      | 9  | 428  | 15825 | 157  | 2.176871 | 0.023307 |
| yellow     | 3367 chr11p15                                      | 26 | 197  | 16056 | 1426 | 1.504254 | 0.02331  |
| yellow     | 8398 GOLDRATH_NAIVE_VS_EFF_CD8_TCELL_UP            | 26 | 197  | 16056 | 1426 | 1.504254 | 0.02331  |
| yellow     | 9183 GSE17974_CTRL_VS_ACT_IL4_AND_ANTI_IL12_48H_CC | 26 | 197  | 16056 | 1426 | 1.504254 | 0.02331  |
| yellow     | 9544 GSE27786_LSK_VS_MONO_MAC_UP                   | 26 | 197  | 16056 | 1426 | 1.504254 | 0.02331  |
| yellow     | 9615 GSE27786_ERYTHROBLAST_VS_MONO_MAC_DN          | 26 | 197  | 16056 | 1426 | 1.504254 | 0.02331  |
| yellow     | 9730 GSE31082_DN_VS_DP_THYMOCYTE_UP                | 26 | 197  | 16056 | 1426 | 1.504254 | 0.02331  |
| brown      | 7807 SASSON_RESPONSE_TO_GONADOTROPHINS_DN          | 18 | 82   | 16171 | 2190 | 1.629101 | 0.023324 |
| grey60     | 50 MEMBRANE_PART                                   | 8  | 1316 | 14937 | 44   | 2.24551  | 0.02333  |
| blue       | 8214 CSR_EARLY_UP.V1_UP                            | 37 | 147  | 16106 | 2978 | 1.373704 | 0.023357 |
| brown      | 1245 NUCLEOSIDE_TRIPHOSPHATASE_ACTIVITY            | 37 | 198  | 16055 | 2190 | 1.386839 | 0.023362 |
| lightcyan  | 5891 GOTZMANN_EPITHELIAL_TO_MESENCHYMAL_TRANSIT    | 2  | 62   | 16191 | 62   | 8.456296 | 0.023381 |
| purple     | 6958 MARTINEZ_RB1_AND_TP53_TARGETS_DN              | 10 | 500  | 15753 | 157  | 2.070446 | 0.023448 |
| pink       | 1601 V\$HNF1_C                                     | 6  | 157  | 16096 | 228  | 2.724271 | 0.023456 |
| yellow     | 6579 BURTON_ADIPOGENESIS_3                         | 15 | 98   | 16155 | 1426 | 1.744533 | 0.023462 |
| cyan       | 904 TRIACYLGLYCEROL_METABOLIC_PROCESS              | 1  | 5    | 16248 | 77   | 42.21558 | 0.023467 |
| cyan       | 5625 LI_WILMS_TUMOR_ANAPLASTIC_DN                  | 1  | 5    | 16248 | 77   | 42.21558 | 0.023467 |
| green      | 5504 SCHLOSSER_MYC_TARGETS_REPRESSED_BY_SERUM      | 20 | 155  | 16098 | 1305 | 1.60702  | 0.023471 |
| yellow     | 6009 NIKOLSKY_BREAST_CANCER_17Q21_Q25_AMPLICON     | 36 | 292  | 15961 | 1426 | 1.405185 | 0.023473 |
| black      | 3331 chr9q34                                       | 8  | 199  | 16054 | 283  | 2.308788 | 0.023485 |
| turquoise  | 5680 KIM_MYCN_AMPLIFICATION_TARGETS_DN             | 32 | 90   | 16163 | 4169 | 1.386146 | 0.023486 |
| pink       | 1509 V\$MZF1_01                                    | 7  | 201  | 16052 | 228  | 2.482565 | 0.02349  |
| pink       | 7925 BHAT_ESR1_TARGETS_VIA_AKT1_UP                 | 8  | 247  | 16006 | 228  | 2.308829 | 0.023511 |
| purple     | 2203 TTANTCA_UNKNOWN                               | 13 | 725  | 15528 | 157  | 1.856262 | 0.023556 |
| brown      | 8963 GSE17721_PAM3CSK4_VS_CPG_16H_BMDM_DN          | 33 | 173  | 16080 | 2190 | 1.415654 | 0.023563 |
| lightgreen | 8276 CTIP_DN.V1_UP                                 | 2  | 92   | 16161 | 42   | 8.412526 | 0.023565 |
| lightgreen | 8377 KRAS.LUNG.BREAST_UP.V1_UP                     | 2  | 92   | 16161 | 42   | 8.412526 | 0.023565 |
| lightcyan  | 731 HOMEOSTATIC_PROCESS                            | 3  | 161  | 16092 | 62   | 4.884692 | 0.023567 |
| lightcyan  | 8813 GSE15930_STIM_VS_STIM_AND_TRICHOSTATINA_72H   | 3  | 161  | 16092 | 62   | 4.884692 | 0.023567 |
| tan        | 7840 MARTENS_TRETINOIN_RESPONSE_DN                 | 13 | 786  | 15467 | 145  | 1.8539   | 0.023577 |
| brown      | 568 PEPTIDE_METABOLIC_PROCESS                      | 4  | 9    | 16244 | 2190 | 3.298427 | 0.023593 |
| brown      | 1358 PROTEIN_SERINE_THREONINE_TYROSINE_KINASE_ACTI | 4  | 9    | 16244 | 2190 | 3.298427 | 0.023593 |
| brown      | 2982 BIOCARTA_GLYCOLYSIS_PATHWAY                   | 4  | 9    | 16244 | 2190 | 3.298427 | 0.023593 |
| brown      | 3090 BIOCARTA_BARRESTIN_PATHWAY                    | 4  | 9    | 16244 | 2190 | 3.298427 | 0.023593 |
| brown      | 3829 MODULE_401                                    | 4  | 9    | 16244 | 2190 | 3.298427 | 0.023593 |
| brown      | 4577 REACTOME_ROLE_OF_DCC_IN_REGULATING_APOPTOS    | 4  | 9    | 16244 | 2190 | 3.298427 | 0.023593 |
| brown      | 4660 REACTOME_DSCAM_INTERACTIONS                   | 4  | 9    | 16244 | 2190 | 3.298427 | 0.023593 |

|            |                                                   |    |     |       |      |          |          |
|------------|---------------------------------------------------|----|-----|-------|------|----------|----------|
| brown      | 7551 YAMANAKA_GLIOBLASTOMA_SURVIVAL_UP            | 4  | 9   | 16244 | 2190 | 3.298427 | 0.023593 |
| red        | 1138 PURINE_NUCLEOTIDE_BINDING                    | 12 | 194 | 16059 | 524  | 1.918588 | 0.02361  |
| red        | 2113 TTTGCAG,MIR-518A-2                           | 12 | 194 | 16059 | 524  | 1.918588 | 0.02361  |
| red        | 8408 GSE10239_NAIVE_VS_KLRG1INT_EFF_CD8_TCELL_UP  | 12 | 194 | 16059 | 524  | 1.918588 | 0.02361  |
| red        | 9331 GSE22886_NAIVE_VS_IGM_MEMORY_BCELL_DN        | 12 | 194 | 16059 | 524  | 1.918588 | 0.02361  |
| purple     | 1677 V\$PAX4_04                                   | 5  | 168 | 16085 | 157  | 3.081021 | 0.023616 |
| purple     | 8871 GSE17721_CTRL_VS_PAM3CSK4_4H_BMDM_DN         | 5  | 168 | 16085 | 157  | 3.081021 | 0.023616 |
| purple     | 8894 GSE17721_CTRL_VS_CPG_24H_BMDM_UP             | 5  | 168 | 16085 | 157  | 3.081021 | 0.023616 |
| purple     | 9271 GSE20366_TREG_VS_NAIVE_CD4_TCELL_DEC205_CON  | 5  | 168 | 16085 | 157  | 3.081021 | 0.023616 |
| blue       | 9546 GSE27786_LIN_NEG_VS_BCELL_UP                 | 44 | 180 | 16073 | 2978 | 1.334102 | 0.023626 |
| turquoise  | 8887 GSE17721_CTRL_VS_CPG_4H_BMDM_DN              | 57 | 175 | 16078 | 4169 | 1.269809 | 0.023632 |
| turquoise  | 8916 GSE17721_LPS_VS_POLYIC_2H_BMDM_UP            | 57 | 175 | 16078 | 4169 | 1.269809 | 0.023632 |
| blue       | 3331 chr9q34                                      | 48 | 199 | 16054 | 2978 | 1.316428 | 0.023648 |
| blue       | 6877 SANSOM_APC_TARGETS_REQUIRE_MYC               | 48 | 199 | 16054 | 2978 | 1.316428 | 0.023648 |
| blue       | 9572 GSE27786_BCELL_VS_NEUTROPHIL_UP              | 48 | 199 | 16054 | 2978 | 1.316428 | 0.023648 |
| tan        | 9654 GSE29618_BCELL_VS_MONOCYTE_UP                | 5  | 182 | 16071 | 145  | 3.079386 | 0.023656 |
| red        | 6681 DAZARD_RESPONSE_TO_UV_NHEK_DN                | 17 | 310 | 15943 | 524  | 1.700942 | 0.023656 |
| pink       | 5727 LIANG_HEMATOPOIESIS_STEM_CELL_NUMBER_LARGE   | 3  | 44  | 16209 | 228  | 4.860347 | 0.02366  |
| pink       | 7771 KYNG_RESPONSE_TO_H2O2_VIA_ERCC6_DN           | 3  | 44  | 16209 | 228  | 4.860347 | 0.02366  |
| pink       | 7960 CHANGOLKAR_H2AFY_TARGETS_UP                  | 3  | 44  | 16209 | 228  | 4.860347 | 0.02366  |
| magenta    | 5455 LINDGREN_BLADDER_CANCER_CLUSTER_2B           | 8  | 338 | 15915 | 167  | 2.303511 | 0.023676 |
| turquoise  | 1206 CYSTEINE_TYPE_PEPTIDASE_ACTIVITY             | 19 | 48  | 16205 | 4169 | 1.543171 | 0.02369  |
| turquoise  | 4250 REACTOME_P53_INDEPENDENT_G1_S_DNA_DAMAGE     | 19 | 48  | 16205 | 4169 | 1.543171 | 0.02369  |
| greenyello | 1502 V\$GATA3_01                                  | 5  | 176 | 16077 | 150  | 3.07822  | 0.023694 |
| greenyello | 8815 GSE16522_MEMORY_VS_NAIVE_CD8_TCELL_DN        | 5  | 176 | 16077 | 150  | 3.07822  | 0.023694 |
| greenyello | 9273 GSE20366_CD103_POS_VS_NEG_TREG_KLRG1NEG_DN   | 5  | 176 | 16077 | 150  | 3.07822  | 0.023694 |
| tan        | 3396 chr6p22                                      | 3  | 69  | 16184 | 145  | 4.873463 | 0.023749 |
| red        | 6475 SESTO_RESPONSE_TO_UV_C2                      | 5  | 51  | 16202 | 524  | 3.0409   | 0.02375  |
| turquoise  | 7868 GREGORY_SYNTHETIC_LETHAL_WITH_IMATINIB       | 43 | 127 | 16126 | 4169 | 1.319977 | 0.023757 |
| green      | 3822 MODULE_389                                   | 22 | 175 | 16078 | 1305 | 1.565697 | 0.02376  |
| brown      | 1681 CCCNNNNNAAGWT_UNKNOWN                        | 19 | 88  | 16165 | 2190 | 1.602361 | 0.023767 |
| brown      | 2050 TTGGGAG,MIR-150                              | 19 | 88  | 16165 | 2190 | 1.602361 | 0.023767 |
| brown      | 2360 MORF_CASP2                                   | 19 | 88  | 16165 | 2190 | 1.602361 | 0.023767 |
| brown      | 7537 HOSHIDA_LIVER_CANCER_SURVIVAL_DN             | 19 | 88  | 16165 | 2190 | 1.602361 | 0.023767 |
| magenta    | 1594 V\$NFKB_Q6                                   | 6  | 215 | 16038 | 167  | 2.716001 | 0.02378  |
| red        | 8120 FOSTER_KDM1A_TARGETS_UP                      | 11 | 172 | 16081 | 524  | 1.983657 | 0.023782 |
| pink       | 853 CHEMICAL_HOMEOSTASIS                          | 5  | 116 | 16137 | 228  | 3.072633 | 0.023783 |
| pink       | 3349 chrxp11                                      | 5  | 116 | 16137 | 228  | 3.072633 | 0.023783 |
| pink       | 4953 GAL_LEUKEMIC_STEM_CELL_UP                    | 5  | 116 | 16137 | 228  | 3.072633 | 0.023783 |
| magenta    | 6635 MCCLUNG_COCAIN_REWARD_4WK                    | 3  | 60  | 16193 | 167  | 4.866168 | 0.023785 |
| greenyello | 2717 GNF2_ZAP70                                   | 2  | 26  | 16227 | 150  | 8.334872 | 0.023789 |
| greenyello | 3568 MODULE_80                                    | 2  | 26  | 16227 | 150  | 8.334872 | 0.023789 |
| greenyello | 4082 PID_TCRCALCIUMPATHWAY                        | 2  | 26  | 16227 | 150  | 8.334872 | 0.023789 |
| greenyello | 5691 WANG_RESPONSE_TO_BEXAROTENE_DN               | 2  | 26  | 16227 | 150  | 8.334872 | 0.023789 |
| magenta    | 8240 P53_DN.V2_UP                                 | 4  | 106 | 16147 | 167  | 3.672579 | 0.02379  |
| greenyello | 4450 REACTOME_G_ALPHA_Q_SIGNALLING_EVENTS         | 4  | 118 | 16135 | 150  | 3.672994 | 0.023803 |
| turquoise  | 8565 GSE13484_UNSTIM_VS_12H_YF17D_VACCINE_STIM_PI | 59 | 182 | 16071 | 4169 | 1.263811 | 0.023805 |
| cyan       | 8235 WNT_UP.V1_DN                                 | 3  | 130 | 16123 | 77   | 4.871029 | 0.023811 |
| red        | 2260 YTAATTAA_V\$LHX3_01                          | 9  | 129 | 16124 | 524  | 2.163989 | 0.023832 |
| red        | 5001 GARGALOVIC_RESPONSE_TO_OXIDIZED_PHOSPHOLIPID | 9  | 129 | 16124 | 524  | 2.163989 | 0.023832 |
| yellow     | 1801 V\$NFMUE1_Q6                                 | 30 | 235 | 16018 | 1426 | 1.455015 | 0.023875 |
| brown      | 8466 GSE11864_UNTREATED_VS_CSF1_IFNG_PAM3CYS_IN_I | 36 | 192 | 16061 | 2190 | 1.391524 | 0.023884 |
| brown      | 8927 GSE17721_LPS_VS_POLYIC_16H_BMDM_DN           | 36 | 192 | 16061 | 2190 | 1.391524 | 0.023884 |
| turquoise  | 9278 GSE20366_TREG_VS_NAIVE_CD4_TCELL_UP          | 61 | 189 | 16064 | 4169 | 1.258258 | 0.023933 |
| lightcyan  | 8243 P53_DN.V1_DN                                 | 3  | 162 | 16091 | 62   | 4.85454  | 0.023948 |
| lightcyan  | 9766 GSE33513_TCF7_KO_VS_HET_EARLY_THYMIC_PROGEN  | 3  | 162 | 16091 | 62   | 4.85454  | 0.023948 |
| black      | 6655 WENG_POR_TARGETS_GLOBAL_UP                   | 2  | 14  | 16239 | 283  | 8.204442 | 0.023949 |
| brown      | 302 CELL_ACTIVATION                               | 15 | 65  | 16188 | 2190 | 1.712645 | 0.023949 |
| brown      | 2488 GCM_BECN1                                    | 15 | 65  | 16188 | 2190 | 1.712645 | 0.023949 |
| brown      | 3929 PID_BCR_5PATHWAY                             | 15 | 65  | 16188 | 2190 | 1.712645 | 0.023949 |



|             |                                                    |     |     |       |      |          |          |
|-------------|----------------------------------------------------|-----|-----|-------|------|----------|----------|
| salmon      | 6181 SCHUHMACHER_MYC_TARGETS_UP                    | 3   | 79  | 16174 | 127  | 4.859862 | 0.023959 |
| salmon      | 6231 BHATTACHARYA_EMBRYONIC_STEM_CELL              | 3   | 79  | 16174 | 127  | 4.859862 | 0.023959 |
| blue        | 10083 GSE3982_EFF_MEMORY_VS_CENT_MEMORY_CD4_TCE    | 41  | 166 | 16087 | 2978 | 1.347984 | 0.023966 |
| purple      | 2832 KEGG_CELL_ADHESION_MOLECULES_CAMS             | 4   | 113 | 16140 | 157  | 3.664506 | 0.023973 |
| purple      | 5277 MISSIAGLIA_REGULATED_BY_METHYLATION_UP        | 4   | 113 | 16140 | 157  | 3.664506 | 0.023973 |
| tan         | 2503 GCM_CASP2                                     | 2   | 27  | 16226 | 145  | 8.302937 | 0.02398  |
| pink        | 7150 LABBE_TGFB1_TARGETS_DN                        | 4   | 78  | 16175 | 228  | 3.655646 | 0.024007 |
| pink        | 7565 MIKKELSEN_MCV6_HCP_WITH_H3K27ME3              | 8   | 248 | 16005 | 228  | 2.299519 | 0.024013 |
| greenyello  | 1443 CYTOKINE_ACTIVITY                             | 3   | 67  | 16186 | 150  | 4.851642 | 0.024016 |
| turquoise   | 8419 GSE10239_NAIVE_VS_DAY4.5_EFF_CD8_TCELL_DN     | 63  | 196 | 16057 | 4169 | 1.253101 | 0.024019 |
| turquoise   | 8730 GSE14769_40MIN_VS_360MIN_LPS_BMDM_UP          | 63  | 196 | 16057 | 4169 | 1.253101 | 0.024019 |
| turquoise   | 8856 GSE17721_CTRL_VS_POLYIC_6H_BMDM_UP            | 63  | 196 | 16057 | 4169 | 1.253101 | 0.024019 |
| turquoise   | 9179 GSE17974_CTRL_VS_ACT_IL4_AND_ANTI_IL12_12H_CC | 63  | 196 | 16057 | 4169 | 1.253101 | 0.024019 |
| turquoise   | 10038 GSE3982_MAC_VS_CENT_MEMORY_CD4_TCELL_UP      | 63  | 196 | 16057 | 4169 | 1.253101 | 0.024019 |
| turquoise   | 10087 GSE3982_EFF_MEMORY_CD4_TCELL_VS_TH1_DN       | 63  | 196 | 16057 | 4169 | 1.253101 | 0.024019 |
| turquoise   | 10197 GSE7852_TREG_VS_TCONV_FAT_DN                 | 63  | 196 | 16057 | 4169 | 1.253101 | 0.024019 |
| turquoise   | 10200 GSE7852_LN_VS_FAT_TREG_UP                    | 63  | 196 | 16057 | 4169 | 1.253101 | 0.024019 |
| turquoise   | 10262 GSE9650_EFFECTOR_VS_MEMORY_CD8_TCELL_UP      | 63  | 196 | 16057 | 4169 | 1.253101 | 0.024019 |
| lightgreen  | 5198 CHEBOTAEV_GR_TARGETS_DN                       | 2   | 93  | 16160 | 42   | 8.322069 | 0.024044 |
| purple      | 1273 PEPTIDE_RECEPTOR_ACTIVITY                     | 2   | 25  | 16228 | 157  | 8.281783 | 0.02405  |
| purple      | 1393 STRUCTURAL_CONSTITUENT_OF_MUSCLE              | 2   | 25  | 16228 | 157  | 8.281783 | 0.02405  |
| purple      | 5252 GAUSSMANN_MLL_AF4_FUSION_TARGETS_F_DN         | 2   | 25  | 16228 | 157  | 8.281783 | 0.02405  |
| purple      | 5951 SAKAI_TUMOR_INFILTRATING_MONOCYTES_UP         | 2   | 25  | 16228 | 157  | 8.281783 | 0.02405  |
| purple      | 6441 GENTILE_UV_LOW_DOSE_UP                        | 2   | 25  | 16228 | 157  | 8.281783 | 0.02405  |
| purple      | 6900 JEPSEN_SMRT_TARGETS                           | 2   | 25  | 16228 | 157  | 8.281783 | 0.02405  |
| pink        | 8078 PLASARI_TGFB1_TARGETS_10HR_DN                 | 7   | 202 | 16051 | 228  | 2.470275 | 0.024054 |
| yellow      | 10185 GSE7460_CTRL_VS_FOXP3_OVEREXPR_TCONV_1_DN    | 24  | 179 | 16074 | 1426 | 1.528172 | 0.024057 |
| green       | 4384 REACTOME_LOSS_OF_NLP_FROM_MITOTIC_CENTROSC    | 9   | 53  | 16200 | 1305 | 2.114899 | 0.024067 |
| midnightb   | 2539 GCM_NUMA1                                     | 2   | 55  | 16198 | 71   | 8.3242   | 0.024073 |
| lightcyan   | 2634 GNF2_DDX5                                     | 2   | 63  | 16190 | 62   | 8.322069 | 0.024089 |
| lightcyan   | 6414 NATSUME_RESPONSE_TO_INTERFERON_BETA_UP        | 2   | 63  | 16190 | 62   | 8.322069 | 0.024089 |
| lightcyan   | 7189 CADWELL_ATG16L1_TARGETS_UP                    | 2   | 63  | 16190 | 62   | 8.322069 | 0.024089 |
| blue        | 1732 V\$AP2REP_01                                  | 35  | 138 | 16115 | 2978 | 1.384197 | 0.02409  |
| blue        | 524 ACTIVATION_OF_NF_KAPPAB_TRANSCRIPTION_FACTOI   | 7   | 17  | 16236 | 2978 | 2.247284 | 0.024102 |
| blue        | 3097 BIOCARTA_TEL_PATHWAY                          | 7   | 17  | 16236 | 2978 | 2.247284 | 0.024102 |
| lightyellow | 2940 BIOCARTA_CELL2CELL_PATHWAY                    | 1   | 12  | 16241 | 33   | 41.04293 | 0.024103 |
| lightyellow | 3491 SA_REG_CASCADE_OF_CYCLIN_EXPR                 | 1   | 12  | 16241 | 33   | 41.04293 | 0.024103 |
| lightyellow | 3661 MODULE_178                                    | 1   | 12  | 16241 | 33   | 41.04293 | 0.024103 |
| lightyellow | 6258 HEDVAT_ELF4_TARGETS_UP                        | 1   | 12  | 16241 | 33   | 41.04293 | 0.024103 |
| lightyellow | 6417 DAZARD_UV_RESPONSE_CLUSTER_G3                 | 1   | 12  | 16241 | 33   | 41.04293 | 0.024103 |
| lightyellow | 7022 MASRI_RESISTANCE_TO_TAMOXIFEN_AND_AROMATA'    | 1   | 12  | 16241 | 33   | 41.04293 | 0.024103 |
| lightyellow | 7467 IRITANI_MAD1_TARGETS_UP                       | 1   | 12  | 16241 | 33   | 41.04293 | 0.024103 |
| lightyellow | 7637 LOPEZ_MESOTHELIOMA_SURVIVAL_DN                | 1   | 12  | 16241 | 33   | 41.04293 | 0.024103 |
| lightyellow | 7790 NIELSEN_SYNOVIAL_SARCOMA_UP                   | 1   | 12  | 16241 | 33   | 41.04293 | 0.024103 |
| lightyellow | 7887 FIGUEROA_AML_METHYLATION_CLUSTER_5_UP         | 1   | 12  | 16241 | 33   | 41.04293 | 0.024103 |
| grey60      | 5905 BENPORATH_SUZ12_TARGETS                       | 5   | 612 | 15641 | 44   | 3.017862 | 0.024108 |
| grey60      | 889 PERIPHERAL_NERVOUS_SYSTEM_DEVELOPMENT          | 1   | 9   | 16244 | 44   | 41.04293 | 0.024108 |
| grey60      | 3923 MODULE_575                                    | 1   | 9   | 16244 | 44   | 41.04293 | 0.024108 |
| grey60      | 4471 REACTOME_PROSTANOID_LIGAND_RECEPTORS          | 1   | 9   | 16244 | 44   | 41.04293 | 0.024108 |
| grey60      | 5344 SAENZ_DETOX_PATHWAY_AND_CARCIINOGENESIS_DN    | 1   | 9   | 16244 | 44   | 41.04293 | 0.024108 |
| grey60      | 5633 OXFORD_RALA_TARGETS_DN                        | 1   | 9   | 16244 | 44   | 41.04293 | 0.024108 |
| grey60      | 6007 NIKOLSKY_BREAST_CANCER_17P11_AMPLICON         | 1   | 9   | 16244 | 44   | 41.04293 | 0.024108 |
| grey60      | 7517 BOVAULT_LIVER_CANCER_SUBCLASS_G23_DN          | 1   | 9   | 16244 | 44   | 41.04293 | 0.024108 |
| grey60      | 7695 DORN_ADENOVIRUS_INFECTION_24HR_UP             | 1   | 9   | 16244 | 44   | 41.04293 | 0.024108 |
| grey60      | 7765 GERHOLD_RESPONSE_TO_TZD_DN                    | 1   | 9   | 16244 | 44   | 41.04293 | 0.024108 |
| brown       | 809 ANATOMICAL_STRUCTURE_DEVELOPMENT               | 112 | 696 | 15557 | 2190 | 1.194258 | 0.024113 |
| lightcyan   | 5486 FARMER_BREAST_CANCER_APOCRINE_VS_LUMINAL      | 4   | 288 | 15965 | 62   | 3.640905 | 0.024133 |
| lightgreen  | 8184 ZWANG_CLASS_1_TRANSIENTLY_INDUCED_BY_EGF      | 4   | 428 | 15825 | 42   | 3.6166   | 0.024137 |
| pink        | 1225 SUBSTRATE_SPECIFIC_TRANSPORTER_ACTIVITY       | 9   | 296 | 15957 | 228  | 2.167452 | 0.02414  |
| purple      | 8732 GSE15215_CD2_POS_VS_NEG_PDC_UP                | 5   | 169 | 16084 | 157  | 3.06279  | 0.024153 |

|             |       |                                               |    |      |       |      |          |          |
|-------------|-------|-----------------------------------------------|----|------|-------|------|----------|----------|
| purple      | 8903  | GSE17721_CTRL_VS_GARDIQUIMOD_4H_BMDM_DN       | 5  | 169  | 16084 | 157  | 3.06279  | 0.024153 |
| red         | 6282  | LEI_MYB_TARGETS                               | 16 | 287  | 15966 | 524  | 1.729181 | 0.02416  |
| turquoise   | 148   | MITOCHONDRIAL_INNER_MEMBRANE                  | 24 | 64   | 16189 | 4169 | 1.461951 | 0.02417  |
| turquoise   | 6826  | PELLICCIOTTA_HDAC_IN_ANTIGEN_PRESENTATION_UP  | 24 | 64   | 16189 | 4169 | 1.461951 | 0.02417  |
| black       | 8241  | RELA_DN.V1_DN                                 | 5  | 94   | 16159 | 283  | 3.054846 | 0.024176 |
| turquoise   | 5969  | MORI_PRE_BI_LYMPHOCYTE_DN                     | 28 | 77   | 16176 | 4169 | 1.41765  | 0.024182 |
| blue        | 9015  | GSE17721_POLYIC_VS_CPG_12H_BMDM_DN            | 45 | 185  | 16068 | 2978 | 1.327546 | 0.024187 |
| blue        | 9460  | GSE24634_IL4_VS_CTRL_TREATED_NAIVE_CD4_TCELL_ | 45 | 185  | 16068 | 2978 | 1.327546 | 0.024187 |
| blue        | 9569  | GSE27786_BCELL_VS_NKTCELL_DN                  | 45 | 185  | 16068 | 2978 | 1.327546 | 0.024187 |
| yellow      | 5622  | MARTORIATI_MDM4_TARGETS_FETAL_LIVER_UP        | 27 | 207  | 16046 | 1426 | 1.486646 | 0.024199 |
| greenyello  | 8532  | GSE13306_TREG_VS_TCONV_LAMINA_PROPRIA_UP      | 5  | 177  | 16076 | 150  | 3.060829 | 0.024208 |
| greenyello  | 9525  | GSE2706_2H_VS_8H_LPS_STIM_DC_DN               | 5  | 177  | 16076 | 150  | 3.060829 | 0.024208 |
| greenyello  | 10061 | GSE3982_BCELL_VS_BASOPHIL_DN                  | 5  | 177  | 16076 | 150  | 3.060829 | 0.024208 |
| greenyello  | 10189 | GSE7764_IL15_TREATED_VS_CTRL_NK_CELL_24H_DN   | 5  | 177  | 16076 | 150  | 3.060829 | 0.024208 |
| purple      | 2046  | TTGCCAA,MIR-182                               | 7  | 294  | 15959 | 157  | 2.464816 | 0.024224 |
| green       | 2199  | TGGNNNNNNKCCAR_UNKNOWN                        | 37 | 330  | 15923 | 1305 | 1.396403 | 0.024226 |
| blue        | 5155  | HAHTOLA_MYCOSIS_FUNGOIDES_CD4_DN              | 30 | 115  | 16138 | 2978 | 1.423745 | 0.024229 |
| brown       | 8127  | BOUDOUKHA_BOUND_BY_IGF2BP2                    | 21 | 100  | 16153 | 2190 | 1.558507 | 0.024268 |
| purple      | 2247  | TTGTTT_V\$FOXO4_01                            | 24 | 1632 | 14621 | 157  | 1.522387 | 0.024274 |
| magenta     | 1780  | CTTTAAR_UNKNOWN                               | 14 | 757  | 15496 | 167  | 1.799903 | 0.024302 |
| lightcyan   | 4807  | PICCALUGA_ANGIOIMMUNOBLASTIC_LYMPHOMA_UP      | 3  | 163  | 16090 | 62   | 4.824758 | 0.024332 |
| yellow      | 10128 | GSE6269_HEALTHY_VS_E_COLI_INF_PBMUC_UP        | 23 | 170  | 16083 | 1426 | 1.54203  | 0.024366 |
| turquoise   | 5082  | TIEN_INTESTINE_PROBIOTICS_6HR_DN              | 52 | 158  | 16095 | 4169 | 1.283063 | 0.024386 |
| yellow      | 7655  | CAIRO_HEPATOBLASTOMA_CLASSES_UP               | 66 | 591  | 15662 | 1426 | 1.27283  | 0.024428 |
| red         | 9008  | GSE17721_POLYIC_VS_CPG_4H_BMDM_UP             | 12 | 195  | 16058 | 524  | 1.908749 | 0.024454 |
| red         | 9449  | GSE24634_TEFF_VS_TCONV_DAY3_IN_CULTURE_DN     | 12 | 195  | 16058 | 524  | 1.908749 | 0.024454 |
| purple      | 7145  | BOQUEST_STEM_CELL_CULTURED_VS_FRESH_UP        | 8  | 362  | 15891 | 157  | 2.287785 | 0.024488 |
| brown       | 1932  | V\$ER_Q6_02                                   | 38 | 205  | 16048 | 2190 | 1.375685 | 0.024509 |
| turquoise   | 3061  | BIOCARTA_PGC1A_PATHWAY                        | 10 | 21   | 16232 | 4169 | 1.856446 | 0.024514 |
| turquoise   | 3233  | chr4q28                                       | 10 | 21   | 16232 | 4169 | 1.856446 | 0.024514 |
| turquoise   | 4243  | REACTOME_DOWNREGULATION_OF_TGF_BETA_RECEP     | 10 | 21   | 16232 | 4169 | 1.856446 | 0.024514 |
| green       | 4822  | HOLLMANN_APOPTOSIS_VIA_CD40_DN                | 30 | 257  | 15996 | 1305 | 1.453822 | 0.024526 |
| red         | 1201  | ADENYL_RIBONUCLEOTIDE_BINDING                 | 10 | 151  | 16102 | 524  | 2.054118 | 0.024537 |
| purple      | 800   | CELL_PROLIFERATION_GO_0008283                 | 9  | 432  | 15821 | 157  | 2.156714 | 0.024561 |
| blue        | 1535  | V\$USF_01                                     | 55 | 233  | 16020 | 2978 | 1.288296 | 0.024563 |
| blue        | 5417  | BAKER_HEMATOPOESIS_STAT5_TARGETS              | 4  | 7    | 16246 | 2978 | 3.11868  | 0.024584 |
| blue        | 7947  | MIKHAYLOVA_OXIDATIVE_STRESS_RESPONSE_VIA_VHL  | 4  | 7    | 16246 | 2978 | 3.11868  | 0.024584 |
| salmon      | 2457  | MORF_RAC1                                     | 5  | 210  | 16043 | 127  | 3.047057 | 0.024584 |
| lightyellow | 9632  | GSE29614_CTRL_VS_DAY3_TIV_FLU_VACCINE_PBMUC_U | 2  | 120  | 16133 | 33   | 8.208586 | 0.02459  |
| blue        | 930   | CHROMATIN_MODIFICATION                        | 16 | 53   | 16200 | 2978 | 1.647604 | 0.024598 |
| blue        | 4384  | REACTOME_LOSS_OF_NLP_FROM_MITOTIC_CENTROSC    | 16 | 53   | 16200 | 2978 | 1.647604 | 0.024598 |
| blue        | 4748  | REACTOME_MEIOTIC_SYNAPSIS                     | 16 | 53   | 16200 | 2978 | 1.647604 | 0.024598 |
| blue        | 7802  | WU_APOPTOSIS_BY_CDKN1A_VIA_TP53               | 16 | 53   | 16200 | 2978 | 1.647604 | 0.024598 |
| blue        | 10163 | GSE7460_TREG_VS_TCONV_ACT_DN                  | 42 | 171  | 16082 | 2978 | 1.340485 | 0.024614 |
| yellow      | 8746  | GSE15659_NAIVE_CD4_TCELL_VS_RESTING_TREG_UP   | 22 | 161  | 16092 | 1426 | 1.557438 | 0.024619 |
| brown       | 1230  | PEPTIDE_BINDING                               | 13 | 54   | 16199 | 2190 | 1.786648 | 0.024633 |
| brown       | 2309  | MORF_GPX4                                     | 13 | 54   | 16199 | 2190 | 1.786648 | 0.024633 |
| brown       | 4114  | PID_RAC1_PATHWAY                              | 13 | 54   | 16199 | 2190 | 1.786648 | 0.024633 |
| tan         | 9204  | GSE17974_0.5H_VS_72H_UNTREATED_IN_VITRO_CD4_  | 5  | 184  | 16069 | 145  | 3.045915 | 0.024654 |
| tan         | 10055 | GSE3982_NEUTROPHIL_VS_NKCELL_DN               | 5  | 184  | 16069 | 145  | 3.045915 | 0.024654 |
| red         | 1975  | ATGTAGC,MIR-221,MIR-222                       | 8  | 109  | 16144 | 524  | 2.27649  | 0.024654 |
| red         | 1992  | GCACCTT,MIR-18A,MIR-18B                       | 8  | 109  | 16144 | 524  | 2.27649  | 0.024654 |
| purple      | 8296  | BMI1_DN_MEL18_DN.V1_UP                        | 4  | 114  | 16139 | 157  | 3.632361 | 0.024664 |
| turquoise   | 8759  | GSE15659_RESTING_TREG_VS_NONSUPPRESSIVE_TCEL  | 54 | 165  | 16088 | 4169 | 1.275885 | 0.024674 |
| yellow      | 8521  | GSE12845_NAIVE_VS_DARKZONE_GC_TONSIL_BCELL_[  | 26 | 198  | 16055 | 1426 | 1.496657 | 0.024674 |
| lightcyan   | 5487  | FARMER_BREAST_CANCER_APOCRINE_VS_BASAL        | 4  | 290  | 15963 | 62   | 3.615795 | 0.024676 |
| red         | 8200  | ERB2_UP.V1_UP                                 | 11 | 173  | 16080 | 524  | 1.97219  | 0.02469  |
| red         | 9237  | GSE18791_CTRL_VS_NEWCASTLE_VIRUS_DC_18H_DN    | 11 | 173  | 16080 | 524  | 1.97219  | 0.02469  |
| red         | 9988  | GSE3982_EOSINOPHIL_VS_TH1_UP                  | 11 | 173  | 16080 | 524  | 1.97219  | 0.02469  |
| purple      | 1540  | V\$GATA1_02                                   | 5  | 170  | 16083 | 157  | 3.044773 | 0.024697 |

|            |                                                    |     |     |       |      |          |          |
|------------|----------------------------------------------------|-----|-----|-------|------|----------|----------|
| green      | 1544 V\$FOXD3_01                                   | 19  | 146 | 16107 | 1305 | 1.620779 | 0.024697 |
| turquoise  | 5756 ALCALA_APOPTOSIS                              | 31  | 87  | 16166 | 4169 | 1.389134 | 0.024701 |
| green      | 6632 TSENG_IRS1_TARGETS_DN                         | 16  | 117 | 16136 | 1305 | 1.703167 | 0.02471  |
| salmon     | 7824 WHITFIELD_CELL_CYCLE_M_G1                     | 4   | 141 | 16112 | 127  | 3.630536 | 0.024717 |
| lightcyan  | 8849 GSE17721_CTRL_VS_POLYIC_0.5H_BMDM_DN          | 3   | 164 | 16089 | 62   | 4.795338 | 0.024719 |
| blue       | 3391 chr20q11                                      | 24  | 88  | 16165 | 2978 | 1.488461 | 0.024723 |
| blue       | 1840 V\$CIZ_01                                     | 46  | 190 | 16063 | 2978 | 1.321335 | 0.024726 |
| blue       | 8977 GSE17721_CPG_VS_GARDIQUIMOD_8H_BMDM_DN        | 46  | 190 | 16063 | 2978 | 1.321335 | 0.024726 |
| blue       | 9481 GSE26669_CTRL_VS_COSTIM_BLOCK_MLR_CD8_TCELL   | 46  | 190 | 16063 | 2978 | 1.321335 | 0.024726 |
| greenyello | 8615 GSE14000_UNSTIM_VS_4H_LPS_DC_TRANSLATED_RNA   | 5   | 178 | 16075 | 150  | 3.043633 | 0.024728 |
| magenta    | 5037 MULLIGHAN_MLL_SIGNATURE_1_DN                  | 6   | 217 | 16036 | 167  | 2.690968 | 0.024744 |
| salmon     | 2292 MORF_ATOX1                                    | 3   | 80  | 16173 | 127  | 4.799114 | 0.024754 |
| red        | 3351 chrxp22                                       | 7   | 89  | 16164 | 524  | 2.439553 | 0.024763 |
| cyan       | 7254 LEE_LIVER_CANCER_SURVIVAL_UP                  | 3   | 132 | 16121 | 77   | 4.797226 | 0.02477  |
| blue       | 1019 POSITIVE_REGULATION_OF_TRANSCRIPTION          | 33  | 129 | 16124 | 2978 | 1.396153 | 0.024771 |
| red        | 8022 PURBEY_TARGETS_OF_CTBP1_NOT_SATB1_DN          | 19  | 360 | 15893 | 524  | 1.637018 | 0.024779 |
| brown      | 3525 MODULE_36                                     | 30  | 155 | 16098 | 2190 | 1.436412 | 0.024839 |
| brown      | 6139 UEDA_PERIFERAL_CLOCK                          | 30  | 155 | 16098 | 2190 | 1.436412 | 0.024839 |
| purple     | 1015 SYSTEM_PROCESS                                | 8   | 363 | 15890 | 157  | 2.281483 | 0.024842 |
| blue       | 71 NON_MEMBRANE_BOUND_ORGANELLE                    | 124 | 575 | 15678 | 2978 | 1.176963 | 0.024868 |
| blue       | 177 INTRACELLULAR_NON_MEMBRANE_BOUND_ORGANEL       | 124 | 575 | 15678 | 2978 | 1.176963 | 0.024868 |
| black      | 9690 GSE29618_PRE_VS_DAY7_POST_LAIV_FLU_VACCINE_M  | 7   | 164 | 16089 | 283  | 2.451327 | 0.024889 |
| yellow     | 4694 REACTOME_INFLUENZA_LIFE_CYCLE                 | 19  | 134 | 16119 | 1426 | 1.61608  | 0.024906 |
| brown      | 8848 GSE17721_CTRL_VS_POLYIC_0.5H_BMDM_UP          | 34  | 180 | 16073 | 2190 | 1.401832 | 0.024924 |
| greenyello | 1270 RHODOPSIN_LIKE_RECEPTOR_ACTIVITY              | 3   | 68  | 16185 | 150  | 4.780294 | 0.024959 |
| magenta    | 500 REGULATION_OF_T_CELL_ACTIVATION                | 2   | 24  | 16229 | 167  | 8.110279 | 0.024978 |
| magenta    | 3747 MODULE_288                                    | 2   | 24  | 16229 | 167  | 8.110279 | 0.024978 |
| magenta    | 7566 MIKKELSEN_MCV6_ICP_WITH_H3K4ME3_AND_H3K27M    | 2   | 24  | 16229 | 167  | 8.110279 | 0.024978 |
| magenta    | 7627 WORSCHER_TUMOR_EVASION_AND_TOLEROGENICIT      | 2   | 24  | 16229 | 167  | 8.110279 | 0.024978 |
| blue       | 650 PROTEIN_CATABOLIC_PROCESS                      | 19  | 66  | 16187 | 2978 | 1.571153 | 0.024999 |
| green      | 7205 QI_PLASMACYTOMA_DN                            | 13  | 89  | 16164 | 1305 | 1.819183 | 0.025021 |
| green      | 4225 REACTOME_EXTRACELLULAR_MATRIX_ORGANIZATION    | 10  | 62  | 16191 | 1305 | 2.008775 | 0.025025 |
| salmon     | 6580 DAZARD_RESPONSE_TO_UV_NHEK_UP                 | 5   | 211 | 16042 | 127  | 3.032616 | 0.025028 |
| green      | 9946 GSE37416_12H_VS_48H_F_TULARENSIS_LVS_NEUTROI  | 24  | 196 | 16057 | 1305 | 1.525029 | 0.025034 |
| turquoise  | 8542 GSE13306_RA_VS_UNTREATED_TCONV_UP             | 58  | 179 | 16074 | 4169 | 1.263213 | 0.02508  |
| turquoise  | 9561 GSE27786_LIN_NEG_VS_MONO_MAC_DN               | 58  | 179 | 16074 | 4169 | 1.263213 | 0.02508  |
| brown      | 9214 GSE17974_2.5H_VS_72H_IL4_AND_ANTI_IL12_ACT_CD | 37  | 199 | 16054 | 2190 | 1.37987  | 0.02509  |
| brown      | 10228 GSE9006_HEALTHY_VS_TYPE_1_DIABETES_PBMC_4MC  | 37  | 199 | 16054 | 2190 | 1.37987  | 0.02509  |
| pink       | 3766 MODULE_312                                    | 3   | 45  | 16208 | 228  | 4.752339 | 0.025094 |
| lightcyan  | 8759 GSE15659_RESTING_TREG_VS_NONSUPPRESSIVE_TCEL  | 3   | 165 | 16088 | 62   | 4.766276 | 0.02511  |
| yellow     | 4909 CASORELLI_ACUTE_PROMYELOCYTIC_LEUKEMIA_DN     | 72  | 653 | 15600 | 1426 | 1.256705 | 0.025121 |
| yellow     | 8766 GSE15750_WT_VS_TRAF6KO_DAY6_EFF_CD8_TCELL_U   | 25  | 189 | 16064 | 1426 | 1.507621 | 0.025122 |
| yellow     | 9427 GSE24142_ADULT_VS_FETAL_EARLY_THYMIC_PROGEN   | 25  | 189 | 16064 | 1426 | 1.507621 | 0.025122 |
| greenyello | 7342 POTTI_TOPOTECAN_SENSITIVITY                   | 4   | 120 | 16133 | 150  | 3.611778 | 0.025127 |
| yellow     | 5785 NUYTEN_EZH2_TARGETS_DN                        | 104 | 984 | 15269 | 1426 | 1.204626 | 0.025139 |
| tan        | 8506 GSE12845_IGD_POS_BLOOD_VS_NAIVE_TONSIL_BCELL  | 5   | 185 | 16068 | 145  | 3.02945  | 0.025163 |
| turquoise  | 7215 BLUM_RESPONSE_TO_SALIRASIB_DN                 | 101 | 331 | 15922 | 4169 | 1.189584 | 0.025165 |
| black      | 3242 chr5q35                                       | 5   | 95  | 16158 | 283  | 3.022689 | 0.025169 |
| purple     | 6791 DOUGLAS_BMI1_TARGETS_UP                       | 10  | 506 | 15747 | 157  | 2.045895 | 0.025195 |
| turquoise  | 8992 GSE17721_LPS_VS_PAM3CSK4_6H_BMDM_UP           | 60  | 186 | 16067 | 4169 | 1.257593 | 0.025209 |
| turquoise  | 9029 GSE17721_PAM3CSK4_VS_GADIQUIMOD_6H_BMDM_      | 60  | 186 | 16067 | 4169 | 1.257593 | 0.025209 |
| turquoise  | 10271 GSE9988_ANTI_TREM1_VS_LOW_LPS_MONOCYTE_DN    | 60  | 186 | 16067 | 4169 | 1.257593 | 0.025209 |
| cyan       | 3735 MODULE_273                                    | 2   | 52  | 16201 | 77   | 8.118382 | 0.025215 |
| cyan       | 5626 BORLAK_LIVER_CANCER_EGF_UP                    | 2   | 52  | 16201 | 77   | 8.118382 | 0.025215 |
| cyan       | 5845 GARCIA_TARGETS_OF_FLII1_AND_DAX1_UP           | 2   | 52  | 16201 | 77   | 8.118382 | 0.025215 |
| cyan       | 6100 KANNAN_TP53_TARGETS_UP                        | 2   | 52  | 16201 | 77   | 8.118382 | 0.025215 |
| turquoise  | 1813 GATGKMRGCG_UNKNOWN                            | 23  | 61  | 16192 | 4169 | 1.46994  | 0.025229 |
| blue       | 8991 GSE17721_LPS_VS_PAM3CSK4_4H_BMDM_DN           | 47  | 195 | 16058 | 2978 | 1.315443 | 0.025243 |
| blue       | 9574 GSE27786_BCELL_VS_MONO_MAC_UP                 | 47  | 195 | 16058 | 2978 | 1.315443 | 0.025243 |
| blue       | 9991 GSE3982_EOSINOPHIL_VS_TH2_DN                  | 47  | 195 | 16058 | 2978 | 1.315443 | 0.025243 |

|            |                                                    |     |     |       |      |          |          |
|------------|----------------------------------------------------|-----|-----|-------|------|----------|----------|
| purple     | 9523 GSE2706_2H_VS_8H_R848_STIM_DC_DN              | 5   | 171 | 16082 | 157  | 3.026968 | 0.02525  |
| greenyello | 1896 V\$SRF_Q4                                     | 5   | 179 | 16074 | 150  | 3.026629 | 0.025256 |
| greenyello | 8417 GSE10239_KLRG1INT_VS_KLRG1HIGH_EFF_CD8_TCELL  | 5   | 179 | 16074 | 150  | 3.026629 | 0.025256 |
| red        | 1346 AUXILIARY_TRANSPORT_PROTEIN_ACTIVITY          | 3   | 20  | 16233 | 524  | 4.652576 | 0.025256 |
| red        | 3808 MODULE_367                                    | 3   | 20  | 16233 | 524  | 4.652576 | 0.025256 |
| red        | 5179 GESERICK_TERT_TARGETS_DN                      | 3   | 20  | 16233 | 524  | 4.652576 | 0.025256 |
| red        | 5731 SPIELMAN_LYMPHOBLAST_EUROPEAN_VS_ASIAN_2FC    | 3   | 20  | 16233 | 524  | 4.652576 | 0.025256 |
| red        | 7106 BUCKANOVICH_T_LYMPHOCYTE_HOMING_ON_TUMOF      | 3   | 20  | 16233 | 524  | 4.652576 | 0.025256 |
| yellow     | 4853 GAZDA_DIAMOND_BLACKFAN_ANEMIA_ERYTHROID_D     | 53  | 461 | 15792 | 1426 | 1.310355 | 0.025265 |
| green      | 5441 RASHI_RESPONSE_TO_IONIZING_RADIATION_3        | 8   | 45  | 16208 | 1305 | 2.214117 | 0.025279 |
| salmon     | 2362 MORF_CDC10                                    | 4   | 142 | 16111 | 127  | 3.604968 | 0.025285 |
| salmon     | 2380 MORF_EI24                                     | 4   | 142 | 16111 | 127  | 3.604968 | 0.025285 |
| salmon     | 5988 KAUFFMANN_DNA_REPLICATION_GENES               | 4   | 142 | 16111 | 127  | 3.604968 | 0.025285 |
| black      | 5748 SCHLESINGER_METHYLATED_DE_NOVO_IN_CANCER      | 4   | 64  | 16189 | 283  | 3.589443 | 0.025293 |
| turquoise  | 9745 GSE32423_MEMORY_VS_NAIVE_CD8_TCELL_IL7_DN     | 62  | 193 | 16060 | 4169 | 1.25238  | 0.025294 |
| turquoise  | 10097 GSE3982_NKCELL_VS_TH1_DN                     | 62  | 193 | 16060 | 4169 | 1.25238  | 0.025294 |
| turquoise  | 4585 REACTOME_METABOLISM_OF_LIPIDS_AND_LIPOPROTE   | 121 | 403 | 15850 | 4169 | 1.170528 | 0.025304 |
| red        | 1654 V\$FREAC2_01                                  | 12  | 196 | 16057 | 524  | 1.899011 | 0.02532  |
| red        | 10209 GSE7852_THYMUS_VS_FAT_TCONV_DN               | 12  | 196 | 16057 | 524  | 1.899011 | 0.02532  |
| red        | 10268 GSE9988_ANTI_TREM1_VS_LPS_MONOCYTE_UP        | 12  | 196 | 16057 | 524  | 1.899011 | 0.02532  |
| turquoise  | 8402 GOLDRATH_EFF_VS_MEMORY_CD8_TCELL_UP           | 64  | 200 | 16053 | 4169 | 1.247532 | 0.02534  |
| turquoise  | 9379 GSE22886_NAIVE_CD4_TCELL_VS_DC_DN             | 64  | 200 | 16053 | 4169 | 1.247532 | 0.02534  |
| turquoise  | 9435 GSE24634_NAIVE_CD4_TCELL_VS_DAY5_IL4_CONV_TR  | 64  | 200 | 16053 | 4169 | 1.247532 | 0.02534  |
| green      | 4099 PID_BARD1PATHWAY                              | 6   | 29  | 16224 | 1305 | 2.576774 | 0.025366 |
| green      | 4569 REACTOME_THROMBIN_SIGNALLING_THROUGH_PROT     | 6   | 29  | 16224 | 1305 | 2.576774 | 0.025366 |
| green      | 6773 DAZARD_UV_RESPONSE_CLUSTER_G2                 | 6   | 29  | 16224 | 1305 | 2.576774 | 0.025366 |
| purple     | 8043 SERVITJA_ISLET_HNF1A_TARGETS_UP               | 4   | 115 | 16138 | 157  | 3.600775 | 0.025367 |
| magenta    | 1060 CATION_TRANSMEMBRANE_TRANSPORTER_ACTIVITY     | 5   | 161 | 16092 | 167  | 3.022464 | 0.025393 |
| magenta    | 9822 GSE360_DC_VS_MAC_T_GONDII_UP                  | 5   | 161 | 16092 | 167  | 3.022464 | 0.025393 |
| blue       | 2242 TTAYRTAA_V\$E4BP4_01                          | 52  | 219 | 16034 | 2978 | 1.29589  | 0.025409 |
| brown      | 8782 GSE15930_NAIVE_VS_48H_IN_VITRO_STIM_CD8_TCELI | 33  | 174 | 16079 | 2190 | 1.407519 | 0.025437 |
| brown      | 9490 GSE26928_NAIVE_VS_CXCR5_POS_CD4_TCELL_UP      | 33  | 174 | 16079 | 2190 | 1.407519 | 0.025437 |
| pink       | 4864 ZHONG_RESPONSE_TO_AZACITIDINE_AND_TSA_UP      | 6   | 160 | 16093 | 228  | 2.673191 | 0.025445 |
| brown      | 2235 CAGGTA_V\$AREB6_01                            | 99  | 609 | 15644 | 2190 | 1.206444 | 0.025455 |
| brown      | 2256 RGAANNTTC_V\$HSF1_01                          | 60  | 348 | 15905 | 2190 | 1.279562 | 0.025456 |
| cyan       | 7371 SWEET_LUNG_CANCER_KRAS_DN                     | 5   | 351 | 15902 | 77   | 3.006808 | 0.025459 |
| yellow     | 3187 chr11q12                                      | 15  | 99  | 16154 | 1426 | 1.726911 | 0.02549  |
| yellow     | 9341 GSE22886_IGG_IGA_MEMORY_BCELL_VS_BM_PLASMA    | 24  | 180 | 16073 | 1426 | 1.519682 | 0.025533 |
| yellow     | 9588 GSE27786_CD8_TCELL_VS_NKCELL_UP               | 24  | 180 | 16073 | 1426 | 1.519682 | 0.025533 |
| red        | 4593 REACTOME_ORGANIC_CATION_ANION_ZWITTERION_T    | 2   | 8   | 16245 | 524  | 7.754294 | 0.025535 |
| red        | 5380 TAKAYAMA_BOUND_BY_AR                          | 2   | 8   | 16245 | 524  | 7.754294 | 0.025535 |
| red        | 5470 MYLLYKANGAS_AMPLIFICATION_HOT_SPOT_16         | 2   | 8   | 16245 | 524  | 7.754294 | 0.025535 |
| red        | 6284 ROETH_TERT_TARGETS_DN                         | 2   | 8   | 16245 | 524  | 7.754294 | 0.025535 |
| red        | 6758 SASSON_FSH_RESPONSE                           | 2   | 8   | 16245 | 524  | 7.754294 | 0.025535 |
| red        | 7125 MATZUK_LUTEAL_GENES                           | 2   | 8   | 16245 | 524  | 7.754294 | 0.025535 |
| red        | 8036 SCHMIDT_POR_TARGETS_IN_LIMB_BUD_DN            | 2   | 8   | 16245 | 524  | 7.754294 | 0.025535 |
| greenyello | 1233 CHEMOKINE_ACTIVITY                            | 2   | 27  | 16226 | 150  | 8.026173 | 0.025539 |
| greenyello | 2874 KEGG_PRION_DISEASES                           | 2   | 27  | 16226 | 150  | 8.026173 | 0.025539 |
| greenyello | 7490 VALK_AML_CLUSTER_13                           | 2   | 27  | 16226 | 150  | 8.026173 | 0.025539 |
| lightgreen | 711 LYSOSOMAL_TRANSPORT                            | 1   | 10  | 16243 | 42   | 38.69762 | 0.02555  |
| lightgreen | 956 POSITIVE_REGULATION_OF_MAPKKK_CASCADE          | 1   | 10  | 16243 | 42   | 38.69762 | 0.02555  |
| lightgreen | 1084 HEMATOPOIETIN_INTERFERON_CLASSD200_DOMAIN_I   | 1   | 10  | 16243 | 42   | 38.69762 | 0.02555  |
| lightgreen | 1231 ADP_BINDING                                   | 1   | 10  | 16243 | 42   | 38.69762 | 0.02555  |
| lightgreen | 2953 BIOCARTA_CFTR_PATHWAY                         | 1   | 10  | 16243 | 42   | 38.69762 | 0.02555  |
| lightgreen | 4665 REACTOME_IKK_COMPLEX_RECRUITMENT_MEDIATED_    | 1   | 10  | 16243 | 42   | 38.69762 | 0.02555  |
| lightgreen | 5822 GOUYER_TATI_TARGETS_UP                        | 1   | 10  | 16243 | 42   | 38.69762 | 0.02555  |
| salmon     | 4634 REACTOME_REGULATION_OF_MRNA_STABILITY_BY_PF   | 3   | 81  | 16172 | 127  | 4.739866 | 0.025563 |
| yellow     | 1567 V\$COUP_01                                    | 27  | 208 | 16045 | 1426 | 1.479498 | 0.025569 |
| grey60     | 826 RESPONSE_TO_EXTERNAL_STIMULUS                  | 3   | 235 | 16018 | 44   | 4.715571 | 0.025582 |
| turquoise  | 695 PROTEIN_AMINO_ACID_LIPIDATION                  | 11  | 24  | 16229 | 4169 | 1.786829 | 0.025603 |

|             |       |                                               |     |      |       |      |          |          |
|-------------|-------|-----------------------------------------------|-----|------|-------|------|----------|----------|
| turquoise   | 739   | PHOSPHOINOSITIDE_BIOSYNTHETIC_PROCESS         | 11  | 24   | 16229 | 4169 | 1.786829 | 0.025603 |
| turquoise   | 4254  | REACTOME_TGF_BETA_RECEPTOR_SIGNALING_ACTIV    | 11  | 24   | 16229 | 4169 | 1.786829 | 0.025603 |
| red         | 866   | CELL_CYCLE_ARREST_GO_0007050                  | 5   | 52   | 16201 | 524  | 2.982421 | 0.025604 |
| red         | 5098  | NAGASHIMA_EGF_SIGNALING_UP                    | 5   | 52   | 16201 | 524  | 2.982421 | 0.025604 |
| turquoise   | 2078  | GCAAGAC,MIR-431                               | 16  | 39   | 16214 | 4169 | 1.5994   | 0.025604 |
| turquoise   | 7101  | EHLERS_ANEUPLOIDY_UP                          | 16  | 39   | 16214 | 4169 | 1.5994   | 0.025604 |
| yellow      | 1525  | V\$NRF2_01                                    | 33  | 265  | 15988 | 1426 | 1.419326 | 0.025613 |
| brown       | 6189  | SANA_RESPONSE_TO_IFNG_DN                      | 17  | 77   | 16176 | 2190 | 1.638504 | 0.025618 |
| red         | 9869  | GSE360_L_DONOVANI_VS_M_TUBERCULOSIS_MAC_DI    | 11  | 174  | 16079 | 524  | 1.960856 | 0.025623 |
| red         | 9970  | GSE3982_EOSINOPHIL_VS_MAST_CELL_UP            | 11  | 174  | 16079 | 524  | 1.960856 | 0.025623 |
| blue        | 8357  | TBK1.DN.48HRS_UP                              | 15  | 49   | 16204 | 2978 | 1.670721 | 0.025629 |
| brown       | 1420  | PYROPHOSPHATASE_ACTIVITY                      | 39  | 212  | 16041 | 2190 | 1.365269 | 0.025634 |
| tan         | 6795  | KRIGE_RESPONSE_TO_TOSEDOSTAT_6HR_DN           | 14  | 880  | 15373 | 145  | 1.783245 | 0.025645 |
| brown       | 8568  | GSE13484_12H_UNSTIM_VS_YF17D_VACCINE_STIM_PI  | 36  | 193  | 16060 | 2190 | 1.384314 | 0.025673 |
| brown       | 8816  | GSE16522_MEMORY_VS_NAIVE_ANTI_CD3CD28_STIM    | 36  | 193  | 16060 | 2190 | 1.384314 | 0.025673 |
| brown       | 9049  | GSE17721_LPS_VS_CPG_8H_BMDM_DN                | 36  | 193  | 16060 | 2190 | 1.384314 | 0.025673 |
| brown       | 9132  | GSE17721_0.5H_VS_24H_CPG_BMDM_UP              | 36  | 193  | 16060 | 2190 | 1.384314 | 0.025673 |
| brown       | 9329  | GSE22886_NAIVE_VS_IGG_IGA_MEMORY_BCELL_DN     | 36  | 193  | 16060 | 2190 | 1.384314 | 0.025673 |
| brown       | 9598  | GSE27786_NKCELL_VS_NKTCELL_UP                 | 36  | 193  | 16060 | 2190 | 1.384314 | 0.025673 |
| tan         | 5247  | GAUSSMANN_MLL_AF4_FUSION_TARGETS_D_UP         | 2   | 28   | 16225 | 145  | 8.006404 | 0.025676 |
| tan         | 10132 | GSE6269_HEALTHY_VS_STREP_PNEUMO_INF_PBMC_U    | 5   | 186  | 16067 | 145  | 3.013163 | 0.025678 |
| pink        | 136   | INTEGRAL_TO_PLASMA_MEMBRANE                   | 17  | 721  | 15532 | 228  | 1.680786 | 0.025684 |
| brown       | 3385  | chr17q24                                      | 10  | 38   | 16215 | 2190 | 1.953016 | 0.025696 |
| brown       | 4070  | PID_ERBB1_INTERNALIZATION_PATHWAY             | 10  | 38   | 16215 | 2190 | 1.953016 | 0.025696 |
| grey60      | 1504  | V\$EVI1_02                                    | 2   | 92   | 16161 | 44   | 8.030138 | 0.025704 |
| cyan        | 7839  | MARTENS_TRETINOIN_RESPONSE_UP                 | 6   | 478  | 15775 | 77   | 2.649514 | 0.025707 |
| blue        | 1665  | V\$ZF5_B                                      | 48  | 200  | 16053 | 2978 | 1.309846 | 0.025738 |
| lightyellow | 5159  | PROVENZANI_METASTASIS_DN                      | 2   | 123  | 16130 | 33   | 8.008376 | 0.025743 |
| cyan        | 3607  | MODULE_119                                    | 3   | 134  | 16119 | 77   | 4.725625 | 0.02575  |
| cyan        | 6971  | SARRIO_EPITHELIAL_MESENCHYMAL_TRANSITION_DN   | 3   | 134  | 16119 | 77   | 4.725625 | 0.02575  |
| lightcyan   | 5394  | PEREZ_TP63_TARGETS                            | 4   | 294  | 15959 | 62   | 3.566601 | 0.025783 |
| greenyello  | 1470  | V\$RSRFC4_01                                  | 5   | 180  | 16073 | 150  | 3.009815 | 0.025791 |
| greenyello  | 8738  | GSE15324_ELF4_KO_VS_WT_NAIVE_CD8_TCELL_UP     | 5   | 180  | 16073 | 150  | 3.009815 | 0.025791 |
| blue        | 8266  | PRC2_EDD_UP.V1_UP                             | 44  | 181  | 16072 | 2978 | 1.326731 | 0.025832 |
| blue        | 9182  | GSE17974_CTRL_VS_ACT_IL4_AND_ANTI_IL12_48H_CC | 44  | 181  | 16072 | 2978 | 1.326731 | 0.025832 |
| salmon      | 3786  | MODULE_334                                    | 4   | 143  | 16110 | 127  | 3.579759 | 0.02586  |
| pink        | 1364  | CARBOXYLESTERASE_ACTIVITY                     | 2   | 18   | 16235 | 228  | 7.920565 | 0.025861 |
| pink        | 3887  | MODULE_497                                    | 2   | 18   | 16235 | 228  | 7.920565 | 0.025861 |
| pink        | 4423  | REACTOME_FORMATION_OF_TUBULIN_FOLDING_INTE    | 2   | 18   | 16235 | 228  | 7.920565 | 0.025861 |
| red         | 8308  | CRX_DN.V1_UP                                  | 8   | 110  | 16143 | 524  | 2.255795 | 0.025868 |
| green       | 3302  | chr2q21                                       | 7   | 37   | 16216 | 1305 | 2.356239 | 0.025888 |
| purple      | 1412  | GLYCOSAMINOGLYCAN_BINDING                     | 2   | 26   | 16227 | 157  | 7.963253 | 0.025892 |
| purple      | 4415  | REACTOME_GLUCAGON_SIGNALING_IN_METABOLIC_R    | 2   | 26   | 16227 | 157  | 7.963253 | 0.025892 |
| purple      | 5011  | TAKEDA_TARGETS_OF_NUP98_HOXA9_FUSION_3D_DN    | 2   | 26   | 16227 | 157  | 7.963253 | 0.025892 |
| purple      | 6528  | SIMBULAN_PARP1_TARGETS_UP                     | 2   | 26   | 16227 | 157  | 7.963253 | 0.025892 |
| purple      | 6649  | LIANG_SILENCED_BY_METHYLATION_UP              | 2   | 26   | 16227 | 157  | 7.963253 | 0.025892 |
| purple      | 7479  | VALK_AML_CLUSTER_2                            | 2   | 26   | 16227 | 157  | 7.963253 | 0.025892 |
| magenta     | 513   | CYTOKINE_PRODUCTION                           | 3   | 62   | 16191 | 167  | 4.709195 | 0.025902 |
| magenta     | 4757  | REACTOME_POTASSIUM_CHANNELS                   | 3   | 62   | 16191 | 167  | 4.709195 | 0.025902 |
| magenta     | 6301  | ZHAN_MULTIPLE_MYELOMA_UP                      | 3   | 62   | 16191 | 167  | 4.709195 | 0.025902 |
| magenta     | 7274  | GU_PDEF_TARGETS_UP                            | 3   | 62   | 16191 | 167  | 4.709195 | 0.025902 |
| turquoise   | 2311  | MORF_HDAC1                                    | 79  | 253  | 16000 | 4169 | 1.21733  | 0.025915 |
| greenyello  | 989   | TRANSMEMBRANE_RECEPTOR_PROTEIN_TYROSINE_KII   | 3   | 69   | 16184 | 150  | 4.711014 | 0.025922 |
| midnightb   | 2744  | KEGG_TAURINE_AND_HYPOTAURINE_METABOLISM       | 1   | 6    | 16247 | 71   | 38.15258 | 0.02593  |
| brown       | 62    | CYTOPLASM                                     | 291 | 1950 | 14303 | 2190 | 1.10751  | 0.025941 |
| green       | 7725  | MIKKELSEN_MEF_HCP_WITH_H3K27ME3               | 34  | 300  | 15953 | 1305 | 1.411499 | 0.025947 |
| turquoise   | 8181  | ZHOU_CELL_CYCLE_GENES_IN_IR_RESPONSE_6HR      | 30  | 84   | 16169 | 4169 | 1.392335 | 0.025977 |
| purple      | 443   | INTERPHASE                                    | 3   | 66   | 16187 | 157  | 4.705559 | 0.025981 |
| purple      | 7733  | YAO_TEMPORAL_RESPONSE_TO_PROGESTERONE_CLU'    | 3   | 66   | 16187 | 157  | 4.705559 | 0.025981 |
| turquoise   | 4035  | PID_ERBB1_DOWNSTREAM_PATHWAY                  | 36  | 104  | 16149 | 4169 | 1.349494 | 0.025995 |

|             |                                                  |    |     |       |      |          |          |
|-------------|--------------------------------------------------|----|-----|-------|------|----------|----------|
| magenta     | 1376 METAL_ION_TRANSMEMBRANE_TRANSPORTER_ACTIV   | 4  | 109 | 16144 | 167  | 3.571499 | 0.026026 |
| midnightb   | 6754 BROWNE_HCMV_INFECTION_6HR_DN                | 3  | 146 | 16107 | 71   | 4.703743 | 0.026035 |
| lightyellow | 5207 LINDGREN_BLADDER_CANCER_CLUSTER_3_UP        | 3  | 317 | 15936 | 33   | 4.661027 | 0.026043 |
| turquoise   | 6352 MA_MYELOID_DIFFERENTIATION_UP               | 15 | 36  | 16217 | 4169 | 1.62439  | 0.026048 |
| turquoise   | 7341 POTTI_PACLITAXEL_SENSITIVITY                | 15 | 36  | 16217 | 4169 | 1.62439  | 0.026048 |
| pink        | 2042 AGGCACT,MIR-515-3P                          | 4  | 80  | 16173 | 228  | 3.564254 | 0.026054 |
| pink        | 8010 VANLOO_SP3_TARGETS_DN                       | 4  | 80  | 16173 | 228  | 3.564254 | 0.026054 |
| brown       | 450 MUSCLE_CELL_DIFFERENTIATION                  | 6  | 18  | 16235 | 2190 | 2.47382  | 0.026057 |
| brown       | 606 B_CELL_ACTIVATION                            | 6  | 18  | 16235 | 2190 | 2.47382  | 0.026057 |
| brown       | 4273 REACTOME_SIGNALING_BY_FGFR1_FUSION_MUTANTS  | 6  | 18  | 16235 | 2190 | 2.47382  | 0.026057 |
| brown       | 4484 REACTOME_ADHERENS_JUNCTIONS_INTERACTIONS    | 6  | 18  | 16235 | 2190 | 2.47382  | 0.026057 |
| brown       | 4779 REACTOME_GAP_JUNCTION_TRAFFICKING           | 6  | 18  | 16235 | 2190 | 2.47382  | 0.026057 |
| brown       | 5838 SUH_COEXPRESSED_WITH_ID1_AND_ID2_UP         | 6  | 18  | 16235 | 2190 | 2.47382  | 0.026057 |
| lightyellow | 1238 OXYGEN_BINDING                              | 1  | 13  | 16240 | 33   | 37.88578 | 0.026085 |
| lightyellow | 3623 MODULE_135                                  | 1  | 13  | 16240 | 33   | 37.88578 | 0.026085 |
| lightyellow | 3841 MODULE_417                                  | 1  | 13  | 16240 | 33   | 37.88578 | 0.026085 |
| lightyellow | 3857 MODULE_444                                  | 1  | 13  | 16240 | 33   | 37.88578 | 0.026085 |
| lightyellow | 3896 MODULE_516                                  | 1  | 13  | 16240 | 33   | 37.88578 | 0.026085 |
| lightyellow | 4249 REACTOME_SIGNALLING_TO_P38_VIA_RIT_AND_RIN  | 1  | 13  | 16240 | 33   | 37.88578 | 0.026085 |
| lightyellow | 4795 NAKAMURA_CANCER_MICROENVIRONMENT_UP         | 1  | 13  | 16240 | 33   | 37.88578 | 0.026085 |
| lightyellow | 5196 CASTELLANO_NRAS_TARGETS_DN                  | 1  | 13  | 16240 | 33   | 37.88578 | 0.026085 |
| lightyellow | 7011 VICENT_METASTASIS_UP                        | 1  | 13  | 16240 | 33   | 37.88578 | 0.026085 |
| lightyellow | 7665 GUTIERREZ_WALDENSTROEMS_MACROGLOBULINEMIA   | 1  | 13  | 16240 | 33   | 37.88578 | 0.026085 |
| yellow      | 9244 GSE18791_UNSTIM_VS_NEWCATSLE_VIRUS_DC_10H_U | 26 | 199 | 16054 | 1426 | 1.489136 | 0.0261   |
| brown       | 3927 PID_FCR1PATHWAY                             | 14 | 60  | 16193 | 2190 | 1.731674 | 0.026105 |
| yellow      | 6394 IVANOVA_HEMATOPOIESIS_EARLY_PROGENITOR      | 56 | 492 | 15761 | 1426 | 1.29729  | 0.026114 |
| cyan        | 5442 RASHI_RESPONSE_TO_IONIZING_RADIATION_4      | 2  | 53  | 16200 | 77   | 7.965205 | 0.026125 |
| lightyellow | 6256 ALCALAY_AML_BY_NPM1_LOCALIZATION_UP         | 2  | 124 | 16129 | 33   | 7.943793 | 0.026132 |
| pink        | 5898 PASQUALUCCI_LYMPHOMA_BY_GC_STAGE_DN         | 6  | 161 | 16092 | 228  | 2.656587 | 0.026132 |
| red         | 1300 ENZYME_INHIBITOR_ACTIVITY                   | 7  | 90  | 16163 | 524  | 2.412447 | 0.026135 |
| salmon      | 69 NUCLEAR_LUMEN                                 | 7  | 370 | 15883 | 127  | 2.421175 | 0.02619  |
| turquoise   | 3177 chr10p11                                    | 12 | 27  | 16226 | 4169 | 1.732683 | 0.026193 |
| turquoise   | 3759 MODULE_303                                  | 12 | 27  | 16226 | 4169 | 1.732683 | 0.026193 |
| turquoise   | 4682 REACTOME_PKB_MEDIATED_EVENTS                | 12 | 27  | 16226 | 4169 | 1.732683 | 0.026193 |
| turquoise   | 4937 WANG_RESPONSE_TO_ANDROGEN_UP                | 12 | 27  | 16226 | 4169 | 1.732683 | 0.026193 |
| turquoise   | 5263 BARRIER_CANCER_RELAPSE_NORMAL_SAMPLE_UP     | 12 | 27  | 16226 | 4169 | 1.732683 | 0.026193 |
| turquoise   | 5533 AIYAR_COBRA1_TARGETS_DN                     | 12 | 27  | 16226 | 4169 | 1.732683 | 0.026193 |
| tan         | 10250 GSE9037_WT_VS_IRAK4_KO_LPS_1H_STIM_BMDM_UF | 5  | 187 | 16066 | 145  | 2.99705  | 0.026201 |
| red         | 1810 V\$TEF_Q6                                   | 12 | 197 | 16056 | 524  | 1.889371 | 0.026208 |
| red         | 8661 GSE1432_CTRL_VS_IFNG_6H_MICROGLIA_DN        | 12 | 197 | 16056 | 524  | 1.889371 | 0.026208 |
| yellow      | 1884 V\$MYC_Q2                                   | 22 | 162 | 16091 | 1426 | 1.547824 | 0.026213 |
| grey60      | 785 SECOND_MESSENGER_MEDIATED_SIGNALING          | 2  | 93  | 16160 | 44   | 7.943793 | 0.026224 |
| grey60      | 8293 ALK_DN.V1_DN                                | 2  | 93  | 16160 | 44   | 7.943793 | 0.026224 |
| magenta     | 1419 TRANSMEMBRANE_TRANSPORTER_ACTIVITY          | 7  | 281 | 15972 | 167  | 2.424425 | 0.026234 |
| blue        | 3329 chr11q23                                    | 27 | 102 | 16151 | 2978 | 1.444683 | 0.026234 |
| yellow      | 1212 S_ADENOSYLMETHIONINE_DEPENDENT_METHYLTRANS  | 5  | 20  | 16233 | 1426 | 2.849404 | 0.026245 |
| yellow      | 5547 XU_HGF_SIGNALING_NOT_VIA_AKT1_48HR_DN       | 5  | 20  | 16233 | 1426 | 2.849404 | 0.026245 |
| turquoise   | 8471 GSE11864_CSF1_VS_CSF1_PAM3CYS_IN_MAC_DN     | 55 | 169 | 16084 | 4169 | 1.268755 | 0.026246 |
| lightcyan   | 4878 TURASHVILI_BREAST_DUCTAL_CARCINOMA_VS_LOBUL | 2  | 66  | 16187 | 62   | 7.943793 | 0.026266 |
| black       | 3174 chr16q22                                    | 6  | 130 | 16123 | 283  | 2.650666 | 0.026279 |
| pink        | 7443 MEISSNER_BRAIN_HCP_WITH_H3K4ME3_AND_H3K27M  | 18 | 779 | 15474 | 228  | 1.647152 | 0.026291 |
| lightgreen  | 7500 POOLA_INVASIVE_BREAST_CANCER_UP             | 3  | 249 | 16004 | 42   | 4.662364 | 0.026297 |
| blue        | 8473 GSE11864_CSF1_VS_CSF1_IFNG_PAM3CYS_IN_MAC_D | 41 | 167 | 16086 | 2978 | 1.339912 | 0.0263   |
| blue        | 8588 GSE13485_DAY3_VS_DAY7_YF17D_VACCINE_PBMCI   | 41 | 167 | 16086 | 2978 | 1.339912 | 0.0263   |
| blue        | 1032 NUCLEOCYTOPLASMIC_TRANSPORT                 | 23 | 84  | 16169 | 2978 | 1.494367 | 0.026309 |
| blue        | 2318 MORF_PRDX3                                  | 23 | 84  | 16169 | 2978 | 1.494367 | 0.026309 |
| turquoise   | 1505 ACAWNRNSRCGG_UNKNOWN                        | 22 | 58  | 16195 | 4169 | 1.478755 | 0.026311 |
| turquoise   | 4166 REACTOME_ER_PHAGOSOME_PATHWAY               | 22 | 58  | 16195 | 4169 | 1.478755 | 0.026311 |
| midnightb   | 6797 KRIGE_RESPONSE_TO_TOSEDOSTAT_24HR_DN        | 9  | 980 | 15273 | 71   | 2.102285 | 0.026313 |
| red         | 6218 PENG_RAPAMYCIN_RESPONSE_DN                  | 14 | 243 | 16010 | 524  | 1.786998 | 0.026326 |

|             |                                                    |     |     |       |      |          |          |
|-------------|----------------------------------------------------|-----|-----|-------|------|----------|----------|
| turquoise   | 1927 V\$AR_02                                      | 14  | 33  | 16220 | 4169 | 1.653925 | 0.026333 |
| greenyello  | 10203 GSE7852_THYMUS_VS_FAT_TREG_DN                | 5   | 181 | 16072 | 150  | 2.993186 | 0.026333 |
| blue        | 2084 GACAGGG,MIR-339                               | 18  | 62  | 16191 | 2978 | 1.584491 | 0.026369 |
| blue        | 2134 AGGAGTG,MIR-483                               | 18  | 62  | 16191 | 2978 | 1.584491 | 0.026369 |
| blue        | 5809 WEI_MYCN_TARGETS_WITH_E_BOX                   | 159 | 754 | 15499 | 2978 | 1.150892 | 0.02637  |
| purple      | 8708 GSE1460_CORD_VS_ADULT_BLOOD_NAIVE_CD4_TCELL   | 5   | 173 | 16080 | 157  | 2.991974 | 0.026378 |
| purple      | 8788 GSE15930_NAIVE_VS_72H_IN_VITRO_STIM_CD8_TCELI | 5   | 173 | 16080 | 157  | 2.991974 | 0.026378 |
| purple      | 9327 GSE22886_CD4_TCELL_VS_BCELL_NAIVE_DN          | 5   | 173 | 16080 | 157  | 2.991974 | 0.026378 |
| purple      | 2239 TAATTA_V\$CHX10_01                            | 11  | 584 | 15669 | 157  | 1.949906 | 0.02638  |
| salmon      | 8019 PURBEY_TARGETS_OF_CTBP1_AND_SATB1_UP          | 3   | 82  | 16171 | 127  | 4.682063 | 0.026386 |
| salmon      | 1756 V\$BACH1_01                                   | 5   | 214 | 16039 | 127  | 2.990102 | 0.026392 |
| blue        | 9714 GSE30083_SP1_VS_SP4_THYMOCYTE_UP              | 45  | 186 | 16067 | 2978 | 1.320409 | 0.026403 |
| blue        | 10152 GSE7460_TCONV_VS_TREG_THYMUS_UP              | 45  | 186 | 16067 | 2978 | 1.320409 | 0.026403 |
| lightcyan   | 377 SENSORY_PERCEPTION_OF_TASTE                    | 1   | 7   | 16246 | 62   | 37.44931 | 0.026404 |
| lightcyan   | 3377 chr1p                                         | 1   | 7   | 16246 | 62   | 37.44931 | 0.026404 |
| lightcyan   | 6013 NIKOLSKY_BREAST_CANCER_20P13_AMPLICON         | 1   | 7   | 16246 | 62   | 37.44931 | 0.026404 |
| lightcyan   | 7235 ISHIKAWA_STING_SIGNALING                      | 1   | 7   | 16246 | 62   | 37.44931 | 0.026404 |
| turquoise   | 905 PHOSPHOINOSITIDE_METABOLIC_PROCESS             | 13  | 30  | 16223 | 4169 | 1.689366 | 0.026405 |
| turquoise   | 2974 BIOCARTA_FAS_PATHWAY                          | 13  | 30  | 16223 | 4169 | 1.689366 | 0.026405 |
| turquoise   | 4563 REACTOME_MAPK_TARGETS_NUCLEAR_EVENTS_MEDI.    | 13  | 30  | 16223 | 4169 | 1.689366 | 0.026405 |
| turquoise   | 4642 REACTOME_TRANSPORT_TO_THE_GOLGI_AND_SUBSEI    | 13  | 30  | 16223 | 4169 | 1.689366 | 0.026405 |
| red         | 1590 V\$ER_Q6                                      | 13  | 220 | 16033 | 524  | 1.832833 | 0.026411 |
| green       | 8667 GSE1432_1H_VS_24H_IFNG_MICROGLIA_DN           | 24  | 197 | 16056 | 1305 | 1.517288 | 0.026419 |
| turquoise   | 8974 GSE17721_CPG_VS_GARDIQUIMOD_6H_BMDM_UP        | 57  | 176 | 16077 | 4169 | 1.262594 | 0.026426 |
| green       | 663 SYNAPTIC_TRANSMISSION                          | 14  | 99  | 16154 | 1305 | 1.761229 | 0.026474 |
| brown       | 4238 REACTOME_NGF_SIGNALLING_VIA_TRKA_FROM_THE_    | 25  | 125 | 16128 | 2190 | 1.484292 | 0.026479 |
| greenyello  | 5165 KOKKINAKIS_METHIONINE_DEPRIVATION_48HR_UP     | 4   | 122 | 16131 | 150  | 3.552568 | 0.026494 |
| tan         | 2818 KEGG_PEROXISOME                               | 3   | 72  | 16181 | 145  | 4.670402 | 0.02652  |
| tan         | 5850 RICKMAN_TUMOR_DIFFERENTIATED_WELL_VS_MODEI    | 3   | 72  | 16181 | 145  | 4.670402 | 0.02652  |
| lightyellow | 6550 RODWELL_AGING_KIDNEY_DN                       | 2   | 125 | 16128 | 33   | 7.880242 | 0.026523 |
| brown       | 7944 IVANOVSKA_MIR106B_TARGETS                     | 19  | 89  | 16164 | 2190 | 1.584357 | 0.026524 |
| green       | 8221 MTOR_UP.V1_DN                                 | 20  | 157 | 16096 | 1305 | 1.586549 | 0.026533 |
| green       | 7726 MIKKELSEN_MEF_HCP_WITH_H3_UNMETHYLATED        | 16  | 118 | 16135 | 1305 | 1.688733 | 0.026535 |
| cyan        | 239 RNA_METABOLIC_PROCESS                          | 8   | 757 | 15496 | 77   | 2.230678 | 0.026548 |
| turquoise   | 8829 GSE17580_UNINFECTED_VS_S_MANSONI_INF_TEFF_DI  | 59  | 183 | 16070 | 4169 | 1.256905 | 0.026555 |
| green       | 2404 MORF_IL16                                     | 23  | 187 | 16066 | 1305 | 1.531825 | 0.026569 |
| red         | 9627 GSE2826_WT_VS_BTK_KO_BCELL_DN                 | 11  | 175 | 16078 | 524  | 1.949651 | 0.026582 |
| red         | 9980 GSE3982_EOSINOPHIL_VS_BASOPHIL_UP             | 11  | 175 | 16078 | 524  | 1.949651 | 0.026582 |
| red         | 10171 GSE7460_CTRL_VS_TGFB_TREATED_ACT_FOXP3_MUT_  | 11  | 175 | 16078 | 524  | 1.949651 | 0.026582 |
| brown       | 4020 PID_PI3KCIPATHWAY                             | 12  | 49  | 16204 | 2190 | 1.817501 | 0.026589 |
| blue        | 1438 GUANYL_NUCLEOTIDE_EXCHANGE_FACTOR_ACTIVITY    | 14  | 45  | 16208 | 2978 | 1.697948 | 0.02659  |
| blue        | 4276 REACTOME_PI_METABOLISM                        | 14  | 45  | 16208 | 2978 | 1.697948 | 0.02659  |
| blue        | 5426 MIDORIKAWA_AMPLIFIED_IN_LIVER_CANCER          | 14  | 45  | 16208 | 2978 | 1.697948 | 0.02659  |
| yellow      | 9115 GSE17721_0.5H_VS_12H_PAM3CSK4_BMDM_DN         | 25  | 190 | 16063 | 1426 | 1.499686 | 0.026606 |
| yellow      | 9154 GSE17974_0H_VS_2H_IN_VITRO_ACT_CD4_TCELL_UP   | 25  | 190 | 16063 | 1426 | 1.499686 | 0.026606 |
| yellow      | 9260 GSE20366_EX_VIVO_VS_HOMEOSTATIC_CONVERSION_   | 25  | 190 | 16063 | 1426 | 1.499686 | 0.026606 |
| turquoise   | 2171 AAGGGAT,MIR-188                               | 26  | 71  | 16182 | 4169 | 1.427633 | 0.026608 |
| salmon      | 2249 MGGAAGTG_V\$GABP_B                            | 11  | 725 | 15528 | 127  | 1.941711 | 0.026622 |
| turquoise   | 8607 GSE13738_TCR_VS_BYSTANDER_ACTIVATED_CD4_TCEI  | 61  | 190 | 16063 | 4169 | 1.251636 | 0.026638 |
| turquoise   | 9010 GSE17721_POLYIC_VS_CPG_6H_BMDM_UP             | 61  | 190 | 16063 | 4169 | 1.251636 | 0.026638 |
| turquoise   | 9208 GSE17974_2H_VS_72H_UNTREATED_IN_VITRO_CD4_T   | 61  | 190 | 16063 | 4169 | 1.251636 | 0.026638 |
| turquoise   | 9835 GSE360_L_DONOVANI_VS_B_MALAYI_HIGH_DOSE_DC.   | 61  | 190 | 16063 | 4169 | 1.251636 | 0.026638 |
| green       | 9020 GSE17721_PAM3CSK4_VS_GADIQUIMOD_0.5H_BMDM     | 21  | 167 | 16086 | 1305 | 1.566123 | 0.02664  |
| purple      | 1456 AAAYRNCTG_UNKNOWN                             | 7   | 300 | 15953 | 157  | 2.41552  | 0.026659 |
| purple      | 5877 KOYAMA_SEMA3B_TARGETS_DN                      | 8   | 368 | 15885 | 157  | 2.250485 | 0.026664 |
| blue        | 2457 MORF_RAC1                                     | 50  | 210 | 16043 | 2978 | 1.29945  | 0.026665 |
| magenta     | 38 EXTRACELLULAR_REGION                            | 7   | 282 | 15971 | 167  | 2.415828 | 0.026678 |
| turquoise   | 9142 GSE17721_0.5H_VS_8H_GARDIQUIMOD_BMDM_UP       | 63  | 197 | 16056 | 4169 | 1.24674  | 0.026679 |
| turquoise   | 9615 GSE27786_ERYTHROBLAST_VS_MONO_MAC_DN          | 63  | 197 | 16056 | 4169 | 1.24674  | 0.026679 |
| turquoise   | 10191 GSE7764_IL15_NK_CELL_24H_VS_SPLENOCYTE_DN    | 63  | 197 | 16056 | 4169 | 1.24674  | 0.026679 |

|             |       |                                               |    |     |       |      |          |          |
|-------------|-------|-----------------------------------------------|----|-----|-------|------|----------|----------|
| turquoise   | 10226 | GSE9006_HEALTHY_VS_TYPE_1_DIABETES_PBMC_1MC   | 63 | 197 | 16056 | 4169 | 1.24674  | 0.026679 |
| lightcyan   | 10058 | GSE3982_NEUTROPHIL_VS_TH2_UP                  | 3  | 169 | 16084 | 62   | 4.653464 | 0.026707 |
| brown       | 1199  | PROTEIN_KINASE_ACTIVITY                       | 47 | 264 | 15989 | 2190 | 1.321245 | 0.026717 |
| midnightb   | 4824  | LIU_PROSTATE_CANCER_DN                        | 5  | 386 | 15867 | 71   | 2.965227 | 0.026718 |
| grey60      | 2019  | GTGTTGA,MIR-505                               | 2  | 94  | 16159 | 44   | 7.859284 | 0.026749 |
| grey60      | 5967  | ZHANG_RESPONSE_TO_IKK_INHIBITOR_AND_TNF_DN    | 2  | 94  | 16159 | 44   | 7.859284 | 0.026749 |
| grey60      | 914   | AMYLOID_PRECURSOR_PROTEIN_METABOLIC_PROCES    | 1  | 10  | 16243 | 44   | 36.93864 | 0.026752 |
| grey60      | 1306  | NUCLEOBASENUCLEOSIDENUCLEOTIDE_AND_NUCLEIC_   | 1  | 10  | 16243 | 44   | 36.93864 | 0.026752 |
| grey60      | 7697  | DORN_ADENOVIRUS_INFECTION_32HR_UP             | 1  | 10  | 16243 | 44   | 36.93864 | 0.026752 |
| red         | 145   | NUCLEAR_ENVELOPE                              | 6  | 71  | 16182 | 524  | 2.62117  | 0.026758 |
| brown       | 6344  | MENSE_HYPOXIA_UP                              | 20 | 95  | 16158 | 2190 | 1.562413 | 0.026758 |
| yellow      | 1945  | GGGNRMNNYCAT_UNKNOWN                          | 12 | 74  | 16179 | 1426 | 1.848262 | 0.026823 |
| pink        | 9421  | GSE24142_EARLY_THYMIC_PROGENITOR_VS_DN2_THY   | 6  | 162 | 16091 | 228  | 2.640188 | 0.026831 |
| brown       | 9158  | GSE17974_0H_VS_6H_IN_VITRO_ACT_CD4_TCELL_UP   | 34 | 181 | 16072 | 2190 | 1.394087 | 0.026843 |
| brown       | 9945  | GSE37416_12H_VS_24H_F_TULARENSIS_LVS_NEUTROI  | 34 | 181 | 16072 | 2190 | 1.394087 | 0.026843 |
| brown       | 4040  | PID_UPA_UPAR_PATHWAY                          | 9  | 33  | 16220 | 2190 | 2.024035 | 0.026856 |
| yellow      | 7306  | ICHIBA_GRAFT_VERSUS_HOST_DISEASE_D7_DN        | 6  | 27  | 16226 | 1426 | 2.532803 | 0.026877 |
| brown       | 2147  | GGCACTT,MIR-519E                              | 22 | 107 | 16146 | 2190 | 1.525908 | 0.026891 |
| grey60      | 5906  | BENPORATH_EED_TARGETS                         | 5  | 630 | 15623 | 44   | 2.931638 | 0.026904 |
| greenyello  | 1286  | ACTIN_BINDING                                 | 3  | 70  | 16183 | 150  | 4.643714 | 0.026904 |
| greenyello  | 3631  | MODULE_146                                    | 3  | 70  | 16183 | 150  | 4.643714 | 0.026904 |
| lightyellow | 3599  | MODULE_111                                    | 2  | 126 | 16127 | 33   | 7.817701 | 0.026917 |
| blue        | 9347  | GSE22886_DAY0_VS_DAY1_MONOCYTE_IN_CULTURE_    | 46 | 191 | 16062 | 2978 | 1.314417 | 0.026949 |
| blue        | 10175 | GSE7460_FOXP3_MUT_VS_WT_ACT_WITH_TGFB_TCOI    | 46 | 191 | 16062 | 2978 | 1.314417 | 0.026949 |
| purple      | 9136  | GSE17721_12H_VS_24H_CPG_BMDM_UP               | 5  | 174 | 16079 | 157  | 2.974779 | 0.026954 |
| purple      | 10119 | GSE39820_TGFBETA1_VS_TGFBETA3_IN_IL6_TREATED_ | 5  | 174 | 16079 | 157  | 2.974779 | 0.026954 |
| lightgreen  | 5100  | KIM_WT1_TARGETS_DN                            | 4  | 443 | 15810 | 42   | 3.494142 | 0.02696  |
| magenta     | 5688  | YANG_BREAST_CANCER_ESR1_BULK_UP               | 2  | 25  | 16228 | 167  | 7.785868 | 0.02697  |
| magenta     | 6296  | RORIE_TARGETS_OF_EWSR1_FLI1_FUSION_UP         | 2  | 25  | 16228 | 167  | 7.785868 | 0.02697  |
| magenta     | 1208  | SMALL_GTPASE_REGULATOR_ACTIVITY               | 3  | 63  | 16190 | 167  | 4.634445 | 0.026997 |
| magenta     | 6348  | HADDAD_T_LYMPHOCYTE_AND_NK_PROGENITOR_DN      | 3  | 63  | 16190 | 167  | 4.634445 | 0.026997 |
| lightgreen  | 1697  | V\$MEIS1BHXA9_01                              | 2  | 99  | 16154 | 42   | 7.817701 | 0.027001 |
| lightgreen  | 6143  | WIELAND_UP_BY_HBV_INFECTION                   | 2  | 99  | 16154 | 42   | 7.817701 | 0.027001 |
| lightcyan   | 6770  | MAHAJAN_RESPONSE_TO_IL1A_UP                   | 2  | 67  | 16186 | 62   | 7.825229 | 0.027008 |
| pink        | 3504  | MODULE_12                                     | 9  | 302 | 15951 | 228  | 2.12439  | 0.027009 |
| purple      | 3911  | MODULE_544                                    | 3  | 67  | 16186 | 157  | 4.635327 | 0.027012 |
| purple      | 4374  | REACTOME_OPIOID_SIGNALLING                    | 3  | 67  | 16186 | 157  | 4.635327 | 0.027012 |
| pink        | 1612  | V\$HAND1E47_01                                | 7  | 207 | 16046 | 228  | 2.410607 | 0.027015 |
| pink        | 1829  | V\$CACBINDINGPROTEIN_Q6                       | 7  | 207 | 16046 | 228  | 2.410607 | 0.027015 |
| cyan        | 7661  | GUTIERREZ_CHRONIC_LYMPHOCYTIC_LEUKEMIA_DN     | 2  | 54  | 16199 | 77   | 7.817701 | 0.027047 |
| grey60      | 1322  | RECEPTOR_ACTIVITY                             | 4  | 423 | 15830 | 44   | 3.493015 | 0.027072 |
| grey60      | 8124  | RAO_BOUND_BY_SALL4_ISOFORM_B                  | 4  | 423 | 15830 | 44   | 3.493015 | 0.027072 |
| yellow      | 6058  | SHEPARD_CRUSH_AND_BURN_MUTANT_UP              | 24 | 181 | 16072 | 1426 | 1.511286 | 0.027078 |
| yellow      | 8266  | PRC2_EDD_UP.V1_UP                             | 24 | 181 | 16072 | 1426 | 1.511286 | 0.027078 |
| lightcyan   | 10094 | GSE3982_CENT_MEMORY_CD4_TCELL_VS_TH2_UP       | 3  | 170 | 16083 | 62   | 4.626091 | 0.027114 |
| pink        | 7671  | KYNG_WERNER_SYNDROM_AND_NORMAL_AGING_UP       | 4  | 81  | 16172 | 228  | 3.520251 | 0.027116 |
| red         | 1853  | V\$HMGIIY_Q6                                  | 12 | 198 | 16055 | 524  | 1.879829 | 0.027118 |
| red         | 8439  | GSE10325_MYELOID_VS_LUPUS_MYELOID_DN          | 12 | 198 | 16055 | 524  | 1.879829 | 0.027118 |
| red         | 9321  | GSE22886_NAIVE_CD4_TCELL_VS_NKCELL_DN         | 12 | 198 | 16055 | 524  | 1.879829 | 0.027118 |
| blue        | 5033  | MULLIGHAN_NPM1_MUTATED_SIGNATURE_1_DN         | 30 | 116 | 16137 | 2978 | 1.411471 | 0.027118 |
| black       | 8248  | E2F3_UP.V1_UP                                 | 7  | 167 | 16086 | 283  | 2.407291 | 0.027126 |
| salmon      | 3532  | MODULE_43                                     | 3  | 83  | 16170 | 127  | 4.625652 | 0.027223 |
| tan         | 8768  | GSE15750_WT_VS_TRAF6KO_DAY10_EFF_CD8_TCELL_   | 5  | 189 | 16064 | 145  | 2.965335 | 0.027266 |
| grey60      | 874   | ION_HOMEOSTASIS                               | 2  | 95  | 16158 | 44   | 7.776555 | 0.027278 |
| grey60      | 1221  | OXIDOREDUCTASE_ACTIVITY                       | 3  | 241 | 16012 | 44   | 4.598171 | 0.027295 |
| lightyellow | 4489  | REACTOME_G_ALPHA_I_SIGNALLING_EVENTS          | 2  | 127 | 16126 | 33   | 7.756144 | 0.027314 |
| salmon      | 3253  | chr3q22                                       | 2  | 33  | 16220 | 127  | 7.756144 | 0.027314 |
| turquoise   | 7671  | KYNG_WERNER_SYNDROM_AND_NORMAL_AGING_UP       | 29 | 81  | 16172 | 4169 | 1.395772 | 0.027317 |
| black       | 3856  | MODULE_440                                    | 2  | 15  | 16238 | 283  | 7.657479 | 0.02732  |
| black       | 7711  | MIKKELSEN_ES_HCP_WITH_H3K27ME3                | 2  | 15  | 16238 | 283  | 7.657479 | 0.02732  |



|             |                                                     |     |      |       |      |          |          |
|-------------|-----------------------------------------------------|-----|------|-------|------|----------|----------|
| salmon      | 1910 V\$AP1_Q2_01                                   | 5   | 216  | 16037 | 127  | 2.962416 | 0.027327 |
| greenyello  | 1268 CHEMOKINE_RECEPTOR_BINDING                     | 2   | 28   | 16225 | 150  | 7.739524 | 0.027339 |
| blue        | 773 PROTEIN_COMPLEX_ASSEMBLY                        | 39  | 158  | 16095 | 2978 | 1.347151 | 0.027372 |
| turquoise   | 7928 JOHNSTONE_PARVB_TARGETS_1_DN                   | 21  | 55   | 16198 | 4169 | 1.488532 | 0.027409 |
| tan         | 7749 MOOTHA_GLUCONEOGENESIS                         | 2   | 29   | 16224 | 145  | 7.730321 | 0.027419 |
| brown       | 9836 GSE360_L_DONOVANI_VS_B_MALAYI_LOW_DOSE_DC_     | 33  | 175  | 16078 | 2190 | 1.399476 | 0.027424 |
| brown       | 10000 GSE3982_MAST_CELL_VS_BASOPHIL_UP              | 33  | 175  | 16078 | 2190 | 1.399476 | 0.027424 |
| blue        | 5213 NADERI_BREAST_CANCER_PROGNOSIS_UP              | 13  | 41   | 16212 | 2978 | 1.730487 | 0.027436 |
| blue        | 5304 LUI_THYROID_CANCER_PAX8_PPARG_UP               | 13  | 41   | 16212 | 2978 | 1.730487 | 0.027436 |
| greenyello  | 1492 V\$TAL1BETAE47_01                              | 5   | 183  | 16070 | 150  | 2.960474 | 0.02744  |
| greenyello  | 1708 V\$TITF1_Q3                                    | 5   | 183  | 16070 | 150  | 2.960474 | 0.02744  |
| greenyello  | 8677 GSE14350_IL2RB_KO_VS_WT_TEFF_DN                | 5   | 183  | 16070 | 150  | 2.960474 | 0.02744  |
| greenyello  | 9402 GSE24026_PD1_LIGATION_VS_CTRL_IN_ACT_TCELL_LIN | 5   | 183  | 16070 | 150  | 2.960474 | 0.02744  |
| black       | 5854 RICKMAN_METASTASIS_DN                          | 9   | 244  | 16009 | 283  | 2.11836  | 0.027455 |
| cyan        | 6537 BLALOCK_ALZHEIMERS_DISEASE_UP                  | 13  | 1535 | 14718 | 77   | 1.787631 | 0.027458 |
| blue        | 8395 KAECH_DAY8_EFF_VS_MEMORY_CD8_TCELL_DN          | 47  | 196  | 16057 | 2978 | 1.308732 | 0.027471 |
| blue        | 8400 GOLDRATH_NAIVE_VS_MEMORY_CD8_TCELL_UP          | 47  | 196  | 16057 | 2978 | 1.308732 | 0.027471 |
| blue        | 9440 GSE24634_TREG_VS_TCONV_POST_DAY3_IL4_CONVER    | 47  | 196  | 16057 | 2978 | 1.308732 | 0.027471 |
| brown       | 2720 KEGG_PENTOSE_PHOSPHATE_PATHWAY                 | 7   | 23   | 16230 | 2190 | 2.258706 | 0.027492 |
| brown       | 2723 KEGG_GALACTOSE_METABOLISM                      | 7   | 23   | 16230 | 2190 | 2.258706 | 0.027492 |
| brown       | 2968 BIOCARTA_ECM_PATHWAY                           | 7   | 23   | 16230 | 2190 | 2.258706 | 0.027492 |
| brown       | 4265 REACTOME_SIGNALING_BY_FGFR1_MUTANTS            | 7   | 23   | 16230 | 2190 | 2.258706 | 0.027492 |
| brown       | 4530 REACTOME_SMOOTH_MUSCLE_CONTRACTION             | 7   | 23   | 16230 | 2190 | 2.258706 | 0.027492 |
| brown       | 5342 TOMIDA_METASTASIS_UP                           | 7   | 23   | 16230 | 2190 | 2.258706 | 0.027492 |
| lightgreen  | 4366 REACTOME_PEPTIDE_LIGAND_BINDING_RECEPTORS      | 2   | 100  | 16153 | 42   | 7.739524 | 0.027508 |
| yellow      | 9104 GSE17721_0.5H_VS_4H_POLYIC_BMDM_UP             | 23  | 172  | 16081 | 1426 | 1.5241   | 0.027508 |
| lightcyan   | 8465 GSE11864_UNTREATED_VS_CSF1_PAM3CYS_IN_MAC_I    | 3   | 171  | 16082 | 62   | 4.599038 | 0.027525 |
| lightcyan   | 8710 GSE1460_NAIVE_CD4_TCELL_CORD_BLOOD_VS_THYMI    | 3   | 171  | 16082 | 62   | 4.599038 | 0.027525 |
| lightcyan   | 8761 GSE15659_RESTING_VS_ACTIVATED_TREG_DN          | 3   | 171  | 16082 | 62   | 4.599038 | 0.027525 |
| lightcyan   | 9853 GSE360_T_GONDII_VS_M_TUBERCULOSIS_DC_DN        | 3   | 171  | 16082 | 62   | 4.599038 | 0.027525 |
| purple      | 10000 GSE3982_MAST_CELL_VS_BASOPHIL_UP              | 5   | 175  | 16078 | 157  | 2.95778  | 0.027538 |
| purple      | 6691 IVANOVA_HEMATOPOIESIS_STEM_CELL_AND_PROGEN     | 11  | 588  | 15665 | 157  | 1.936642 | 0.027545 |
| brown       | 8484 GSE11924_TFH_VS_TH17_CD4_TCELL_UP              | 36  | 194  | 16059 | 2190 | 1.377178 | 0.027566 |
| brown       | 8814 GSE16522_MEMORY_VS_NAIVE_CD8_TCELL_UP          | 36  | 194  | 16059 | 2190 | 1.377178 | 0.027566 |
| brown       | 9470 GSE25087_TREG_VS_TCONV_ADULT_UP                | 36  | 194  | 16059 | 2190 | 1.377178 | 0.027566 |
| red         | 9609 GSE27786_NKTCCELL_VS_NEUTROPHIL_DN             | 11  | 176  | 16077 | 524  | 1.938573 | 0.027566 |
| brown       | 7594 SCHOEN_NFKB_SIGNALING                          | 8   | 28   | 16225 | 2190 | 2.120417 | 0.027568 |
| green       | 556 AMINO_ACID_CATABOLIC_PROCESS                    | 5   | 22   | 16231 | 1305 | 2.830547 | 0.027569 |
| green       | 838 RESPONSE_TO_UV                                  | 5   | 22   | 16231 | 1305 | 2.830547 | 0.027569 |
| green       | 4457 REACTOME_INHIBITION_OF_INSULIN_SECRETION_BY_I  | 5   | 22   | 16231 | 1305 | 2.830547 | 0.027569 |
| green       | 163 DENDRITE                                        | 4   | 15   | 16238 | 1305 | 3.321175 | 0.027577 |
| green       | 3906 MODULE_534                                     | 4   | 15   | 16238 | 1305 | 3.321175 | 0.027577 |
| green       | 7546 LEE_LIVER_CANCER_HEPATOBLAST                   | 4   | 15   | 16238 | 1305 | 3.321175 | 0.027577 |
| magenta     | 999 TRANSMISSION_OF_NERVE_IMPULSE                   | 4   | 111  | 16142 | 167  | 3.507148 | 0.027586 |
| black       | 5906 BENPORATH_EED_TARGETS                          | 18  | 630  | 15623 | 283  | 1.640888 | 0.027587 |
| blue        | 10012 GSE3982_DC_VS_MAC_UP                          | 43  | 177  | 16076 | 2978 | 1.325879 | 0.027593 |
| green       | 1376 METAL_ION_TRANSMEMBRANE_TRANSPORTER_ACTIV      | 15  | 109  | 16144 | 1305 | 1.713909 | 0.027603 |
| yellow      | 8179 WARTERS_IR_RESPONSE_5GY                        | 8   | 42   | 16211 | 1426 | 2.170974 | 0.027605 |
| salmon      | 9496 GSE26928_CENTR_MEMORY_VS_CXCR5_POS_CD4_TCE     | 4   | 146  | 16107 | 127  | 3.506202 | 0.027632 |
| yellow      | 3173 chrXq28                                        | 11  | 66   | 16187 | 1426 | 1.899603 | 0.027657 |
| turquoise   | 730 NEGATIVE_REGULATION_OF_TRANSCRIPTION            | 54  | 166  | 16087 | 4169 | 1.268199 | 0.027664 |
| turquoise   | 6324 LI_WILMS_TUMOR_VS_FETAL_KIDNEY_1_UP            | 54  | 166  | 16087 | 4169 | 1.268199 | 0.027664 |
| lightyellow | 2114 AACATTC,MIR-409-3P                             | 2   | 128  | 16125 | 33   | 7.695549 | 0.027713 |
| tan         | 8314 RB_DN.V1_UP                                    | 4   | 128  | 16125 | 145  | 3.502802 | 0.027718 |
| turquoise   | 5598 DACOSTA_UV_RESPONSE_VIA_ERCC3_UP               | 92  | 300  | 15953 | 4169 | 1.195551 | 0.027719 |
| red         | 4892 GARY_CD5_TARGETS_UP                            | 23  | 464  | 15789 | 524  | 1.537489 | 0.027739 |
| turquoise   | 7304 GOLDRATH_ANTIGEN_RESPONSE                      | 104 | 343  | 15910 | 4169 | 1.182064 | 0.027744 |
| lightcyan   | 7176 BRUECKNER_TARGETS_OF_MIRLET7A3_DN              | 2   | 68   | 16185 | 62   | 7.710152 | 0.027759 |
| lightcyan   | 7272 HELLEBREKERS_SILENCED_DURING_TUMOR_ANGIOGEI    | 2   | 68   | 16185 | 62   | 7.710152 | 0.027759 |
| blue        | 1775 V\$HTF_01                                      | 17  | 58   | 16195 | 2978 | 1.599668 | 0.027768 |

|             |                                                       |    |     |       |      |          |          |
|-------------|-------------------------------------------------------|----|-----|-------|------|----------|----------|
| blue        | 1967 GKCGCNNTGAYG_UNKNOWN                             | 17 | 58  | 16195 | 2978 | 1.599668 | 0.027768 |
| cyan        | 5683 TSAI_RESPONSE_TO_IONIZING_RADIATION              | 3  | 138 | 16115 | 77   | 4.58865  | 0.027771 |
| cyan        | 8289 ESC_V6.5_UP_EARLY.V1_DN                          | 3  | 138 | 16115 | 77   | 4.58865  | 0.027771 |
| yellow      | 7368 AGUIRRE_PANCREATIC_CANCER_COPY_NUMBER_UP         | 35 | 286 | 15967 | 1426 | 1.394813 | 0.027772 |
| purple      | 1188 POLYSACCHARIDE_BINDING                           | 2  | 27  | 16226 | 157  | 7.668318 | 0.027789 |
| purple      | 1233 CHEMOKINE_ACTIVITY                               | 2  | 27  | 16226 | 157  | 7.668318 | 0.027789 |
| purple      | 3382 chr4q25                                          | 2  | 27  | 16226 | 157  | 7.668318 | 0.027789 |
| purple      | 4098 PID_EPHRINBREVPATHWAY                            | 2  | 27  | 16226 | 157  | 7.668318 | 0.027789 |
| tan         | 8884 GSE17721_CTRL_VS_CPG_2H_BMDM_UP                  | 5  | 190 | 16063 | 145  | 2.949728 | 0.027809 |
| tan         | 9474 GSE26495_NAIVE_VS_PD1LOW_CD8_TCELL_UP            | 5  | 190 | 16063 | 145  | 2.949728 | 0.027809 |
| grey60      | 7962 PASINI_SUZ12_TARGETS_UP                          | 2  | 96  | 16157 | 44   | 7.695549 | 0.027811 |
| turquoise   | 3056 BIOCARTA_CK1_PATHWAY                             | 7  | 13  | 16240 | 4169 | 2.099212 | 0.027815 |
| turquoise   | 3060 BIOCARTA_P27_PATHWAY                             | 7  | 13  | 16240 | 4169 | 2.099212 | 0.027815 |
| turquoise   | 4163 REACTOME_ABCA_TRANSPORTERS_IN_LIPID_HOMEOS       | 7  | 13  | 16240 | 4169 | 2.099212 | 0.027815 |
| turquoise   | 4555 REACTOME_REGULATION_OF_AMPK_ACTIVITY_VIA_LK      | 7  | 13  | 16240 | 4169 | 2.099212 | 0.027815 |
| turquoise   | 6798 GHO_ATF5_TARGETS_UP                              | 7  | 13  | 16240 | 4169 | 2.099212 | 0.027815 |
| turquoise   | 7730 YAO_TEMPORAL_RESPONSE_TO_PROGESTERONE_CLU'       | 7  | 13  | 16240 | 4169 | 2.099212 | 0.027815 |
| brown       | 2278 RGAGGAARY_V\$PU1_Q6                              | 73 | 436 | 15817 | 2190 | 1.242584 | 0.027816 |
| red         | 6721 KAAB_FAILED_HEART_VENTRICLE_DN                   | 4  | 36  | 16217 | 524  | 3.446353 | 0.027846 |
| turquoise   | 9108 GSE17721_0.5H_VS_24H_POLYIC_BMDM_UP              | 56 | 173 | 16080 | 4169 | 1.261954 | 0.027847 |
| tan         | 5853 RICKMAN_METASTASIS_UP                            | 7  | 328 | 15925 | 145  | 2.392157 | 0.027848 |
| pink        | 5162 LIU_CDX2_TARGETS_DN                              | 1  | 2   | 16251 | 228  | 35.64254 | 0.02786  |
| turquoise   | 1776 V\$ARNT_02                                       | 70 | 222 | 16031 | 4169 | 1.229268 | 0.027872 |
| yellow      | 111 ENVELOPE                                          | 22 | 163 | 16090 | 1426 | 1.538329 | 0.027886 |
| yellow      | 134 ORGANELLE_ENVELOPE                                | 22 | 163 | 16090 | 1426 | 1.538329 | 0.027886 |
| green       | 1516 ACAWYAAAG_UNKNOWN                                | 11 | 72  | 16181 | 1305 | 1.902756 | 0.027886 |
| turquoise   | 7737 YAO_TEMPORAL_RESPONSE_TO_PROGESTERONE_CLU'       | 25 | 68  | 16185 | 4169 | 1.433286 | 0.027896 |
| greenyello  | 488 LOCOMOTORY_BEHAVIOR                               | 3  | 71  | 16182 | 150  | 4.57831  | 0.027906 |
| blue        | 3721 MODULE_252                                       | 53 | 225 | 16028 | 2978 | 1.285589 | 0.027908 |
| lightcyan   | 8120 FOSTER_KDM1A_TARGETS_UP                          | 3  | 172 | 16081 | 62   | 4.572299 | 0.02794  |
| lightcyan   | 8198 EGFR_UP.V1_UP                                    | 3  | 172 | 16081 | 62   | 4.572299 | 0.02794  |
| turquoise   | 8729 GSE14769_20MIN_VS_360MIN_LPS_BMDM_DN             | 58 | 180 | 16073 | 4169 | 1.256195 | 0.027976 |
| blue        | 3717 MODULE_245                                       | 9  | 25  | 16228 | 2978 | 1.964768 | 0.027982 |
| blue        | 6085 IIZUKA_LIVER_CANCER_PROGRESSION_G1_G2_DN         | 9  | 25  | 16228 | 2978 | 1.964768 | 0.027982 |
| blue        | 6202 COLLER_MYC_TARGETS_UP                            | 9  | 25  | 16228 | 2978 | 1.964768 | 0.027982 |
| cyan        | 5046 TONKS_TARGETS_OF_RUNX1_RUNX1T1_FUSION_GRAN       | 2  | 55  | 16198 | 77   | 7.675561 | 0.027983 |
| lightyellow | 6735 SATO_SILENCED_BY_METHYLATION_IN_PANCREATIC_C     | 3  | 326 | 15927 | 33   | 4.532348 | 0.027986 |
| green       | 172 EXTRACELLULAR_SPACE                               | 19 | 148 | 16105 | 1305 | 1.598876 | 0.027998 |
| green       | 8800 GSE15930_STIM_VS_STIM_AND_TRICHOSTATINA_24H      | 19 | 148 | 16105 | 1305 | 1.598876 | 0.027998 |
| brown       | 9799 GSE360_CTRL_VS_B_MALAYI_HIGH_DOSE_DC_DN          | 32 | 169 | 16084 | 2190 | 1.405247 | 0.028001 |
| brown       | 10113 GSE39820_IL1B_IL6_VS_IL1B_IL6_IL23A_TREATED_CD4 | 32 | 169 | 16084 | 2190 | 1.405247 | 0.028001 |
| blue        | 2519 GCM_FANCC                                        | 26 | 98  | 16155 | 2978 | 1.447958 | 0.028003 |
| greenyello  | 5070 SENESE_HDAC1_AND_HDAC2_TARGETS_DN                | 5  | 184 | 16069 | 150  | 2.944384 | 0.028004 |
| greenyello  | 8824 GSE17580_TREG_VS_TEFF_UP                         | 5  | 184 | 16069 | 150  | 2.944384 | 0.028004 |
| greenyello  | 9268 GSE20366_TREG_VS_NAIVE_CD4_TCELL_HOMEOSTATI      | 5  | 184 | 16069 | 150  | 2.944384 | 0.028004 |
| greenyello  | 10029 GSE3982_DC_VS_TH2_DN                            | 5  | 184 | 16069 | 150  | 2.944384 | 0.028004 |
| midnightb   | 4982 OSMAN_BLADDER_CANCER_DN                          | 5  | 391 | 15862 | 71   | 2.927308 | 0.028035 |
| turquoise   | 2166 CTTTGCA,MIR-527                                  | 66 | 208 | 16045 | 4169 | 1.237036 | 0.028047 |
| red         | 1782 V\$CEBPGAMMA_Q6                                  | 12 | 199 | 16054 | 524  | 1.870382 | 0.028051 |
| red         | 8394 KAECH_DAY8_EFF_VS_MEMORY_CD8_TCELL_UP            | 12 | 199 | 16054 | 524  | 1.870382 | 0.028051 |
| red         | 8603 GSE13738_RESTING_VS_TCR_ACTIVATED_CD4_TCELL_I    | 12 | 199 | 16054 | 524  | 1.870382 | 0.028051 |
| turquoise   | 8946 GSE17721_POLYIC_VS_PAM3CSK4_24H_BMDM_UP          | 60 | 187 | 16066 | 4169 | 1.250867 | 0.028056 |
| turquoise   | 10250 GSE9037_WT_VS_IRAK4_KO_LPS_1H_STIM_BMDM_UF      | 60 | 187 | 16066 | 4169 | 1.250867 | 0.028056 |
| purple      | 1270 RHODOPSIN_LIKE_RECEPTOR_ACTIVITY                 | 3  | 68  | 16185 | 157  | 4.56716  | 0.028063 |
| purple      | 3877 MODULE_481                                       | 3  | 68  | 16185 | 157  | 4.56716  | 0.028063 |
| purple      | 5197 CHEBOTAEV_GR_TARGETS_UP                          | 3  | 68  | 16185 | 157  | 4.56716  | 0.028063 |
| purple      | 7272 HELLEBREKERS_SILENCED_DURING_TUMOR_ANGIOGEI      | 3  | 68  | 16185 | 157  | 4.56716  | 0.028063 |
| lightyellow | 94 PEROXISOMAL_PART                                   | 1  | 14  | 16239 | 33   | 35.17965 | 0.028064 |
| lightyellow | 162 MICROBODY_PART                                    | 1  | 14  | 16239 | 33   | 35.17965 | 0.028064 |
| lightyellow | 484 PHAGOCYTOSIS                                      | 1  | 14  | 16239 | 33   | 35.17965 | 0.028064 |

|             |       |                                             |    |     |       |      |          |          |
|-------------|-------|---------------------------------------------|----|-----|-------|------|----------|----------|
| lightyellow | 806   | REGULATION_OF_ENDOCYTOSIS                   | 1  | 14  | 16239 | 33   | 35.17965 | 0.028064 |
| lightyellow | 1319  | CARBON_CARBON_LYASE_ACTIVITY                | 1  | 14  | 16239 | 33   | 35.17965 | 0.028064 |
| lightyellow | 3798  | MODULE_354                                  | 1  | 14  | 16239 | 33   | 35.17965 | 0.028064 |
| lightyellow | 4068  | PID_INTEGRIN5_PATHWAY                       | 1  | 14  | 16239 | 33   | 35.17965 | 0.028064 |
| lightyellow | 4428  | REACTOME_AMINE_LIGAND_BINDING_RECEPTORS     | 1  | 14  | 16239 | 33   | 35.17965 | 0.028064 |
| lightgreen  | 93    | IMMUNOLOGICAL_SYNAPSE                       | 1  | 11  | 16242 | 42   | 35.17965 | 0.02807  |
| lightgreen  | 969   | ADENYLATE_CYCLASE_ACTIVATION                | 1  | 11  | 16242 | 42   | 35.17965 | 0.02807  |
| lightgreen  | 979   | INTERFERON_GAMMA_PRODUCTION                 | 1  | 11  | 16242 | 42   | 35.17965 | 0.02807  |
| lightgreen  | 2954  | BIOCARTA_CYTOKINE_PATHWAY                   | 1  | 11  | 16242 | 42   | 35.17965 | 0.02807  |
| lightgreen  | 2983  | BIOCARTA_SET_PATHWAY                        | 1  | 11  | 16242 | 42   | 35.17965 | 0.02807  |
| lightgreen  | 3040  | BIOCARTA_PLCE_PATHWAY                       | 1  | 11  | 16242 | 42   | 35.17965 | 0.02807  |
| lightgreen  | 3132  | chr6q13                                     | 1  | 11  | 16242 | 42   | 35.17965 | 0.02807  |
| lightgreen  | 3729  | MODULE_262                                  | 1  | 11  | 16242 | 42   | 35.17965 | 0.02807  |
| lightgreen  | 5958  | SHIN_B_CELL_LYMPHOMA_CLUSTER_1              | 1  | 11  | 16242 | 42   | 35.17965 | 0.02807  |
| salmon      | 2318  | MORF_PRDX3                                  | 3  | 84  | 16169 | 127  | 4.570585 | 0.028075 |
| salmon      | 7372  | SWEET_KRAS_ONCOGENIC_SIGNATURE              | 3  | 84  | 16169 | 127  | 4.570585 | 0.028075 |
| lightcyan   | 3504  | MODULE_12                                   | 4  | 302 | 15951 | 62   | 3.472121 | 0.028088 |
| turquoise   | 8775  | GSE15767_MED_VS_SCS_MAC_LN_DN               | 62 | 194 | 16059 | 4169 | 1.245924 | 0.028092 |
| turquoise   | 9532  | GSE27786_LSK_VS_CD4_TCELL_UP                | 62 | 194 | 16059 | 4169 | 1.245924 | 0.028092 |
| turquoise   | 9553  | GSE27786_LIN_NEG_VS_NKCELL_DN               | 62 | 194 | 16059 | 4169 | 1.245924 | 0.028092 |
| turquoise   | 10030 | GSE3982_MAC_VS_NEUTROPHIL_UP                | 62 | 194 | 16059 | 4169 | 1.245924 | 0.028092 |
| turquoise   | 10105 | GSE39820_CTRL_VS_TGFBETA1_IL6_CD4_TCELL_DN  | 62 | 194 | 16059 | 4169 | 1.245924 | 0.028092 |
| cyan        | 903   | ACUTE_INFLAMMATORY_RESPONSE                 | 1  | 6   | 16247 | 77   | 35.17965 | 0.028095 |
| cyan        | 5630  | DARWICHE_PAPILLOMA_RISK_HIGH_VS_LOW_UP      | 1  | 6   | 16247 | 77   | 35.17965 | 0.028095 |
| cyan        | 6409  | IYENGAR_RESPONSE_TO_ADIPOCYTE_FACTORS       | 1  | 6   | 16247 | 77   | 35.17965 | 0.028095 |
| cyan        | 7047  | NADELLA_PRKAR1A_TARGETS_DN                  | 1  | 6   | 16247 | 77   | 35.17965 | 0.028095 |
| cyan        | 7292  | PALOMERO_GSI_SENSITIVITY_DN                 | 1  | 6   | 16247 | 77   | 35.17965 | 0.028095 |
| pink        | 260   | NUCLEOBASENUCLEOSIDE_AND_NUCLEOTIDE_METABC  | 3  | 47  | 16206 | 228  | 4.550112 | 0.0281   |
| pink        | 5505  | SCHLOSSER_MYC_TARGETS_AND_SERUM_RESPONSE_I  | 3  | 47  | 16206 | 228  | 4.550112 | 0.0281   |
| pink        | 5506  | SCHLOSSER_MYC_TARGETS_AND_SERUM_RESPONSE_U  | 3  | 47  | 16206 | 228  | 4.550112 | 0.0281   |
| pink        | 6667  | LIU_SMARCA4_TARGETS                         | 3  | 47  | 16206 | 228  | 4.550112 | 0.0281   |
| pink        | 6673  | ZHANG_ANTIVIRAL_RESPONSE_TO_RIBAVIRIN_DN    | 3  | 47  | 16206 | 228  | 4.550112 | 0.0281   |
| blue        | 2493  | GCM_RAD21                                   | 12 | 37  | 16216 | 2978 | 1.770062 | 0.028104 |
| blue        | 4886  | CHANDRAN_METASTASIS_TOP50_UP                | 12 | 37  | 16216 | 2978 | 1.770062 | 0.028104 |
| blue        | 8144  | HOLLEMAN_VINCISTINE_RESISTANCE_B_ALL_UP     | 12 | 37  | 16216 | 2978 | 1.770062 | 0.028104 |
| blue        | 111   | ENVELOPE                                    | 40 | 163 | 16090 | 2978 | 1.33931  | 0.028106 |
| blue        | 134   | ORGANELLE_ENVELOPE                          | 40 | 163 | 16090 | 2978 | 1.33931  | 0.028106 |
| lightyellow | 3675  | MODULE_195                                  | 2  | 129 | 16124 | 33   | 7.635894 | 0.028114 |
| lightyellow | 8301  | PTEN_DN.V1_DN                               | 2  | 129 | 16124 | 33   | 7.635894 | 0.028114 |
| magenta     | 5560  | DIRMEIER_LMP1_RESPONSE_EARLY                | 3  | 64  | 16189 | 167  | 4.562032 | 0.028117 |
| magenta     | 7998  | DUAN_PRDM5_TARGETS                          | 3  | 64  | 16189 | 167  | 4.562032 | 0.028117 |
| yellow      | 8088  | DELACROIX_RARG_BOUND_MEF                    | 40 | 335 | 15918 | 1426 | 1.360909 | 0.028125 |
| purple      | 8974  | GSE17721_CPG_VS_GARDIQUIMOD_6H_BMDM_UP      | 5  | 176 | 16077 | 157  | 2.940974 | 0.028131 |
| purple      | 9998  | GSE3982_MAST_CELL_VS_BCELL_UP               | 5  | 176 | 16077 | 157  | 2.940974 | 0.028131 |
| brown       | 1829  | V\$CACBINDINGPROTEIN_Q6                     | 38 | 207 | 16046 | 2190 | 1.362394 | 0.028132 |
| magenta     | 1949  | TGAATGT,MIR-181A,MIR-181B,MIR-181C,MIR-181D | 9  | 416 | 15837 | 167  | 2.105553 | 0.028153 |
| yellow      | 8830  | GSE17580_UNINFECTED_VS_S_MANSONI_INF_TREG_U | 25 | 191 | 16062 | 1426 | 1.491835 | 0.028157 |
| yellow      | 10045 | GSE3982_MAC_VS_TH2_DN                       | 25 | 191 | 16062 | 1426 | 1.491835 | 0.028157 |
| green       | 9431  | GSE24142_ADULT_VS_FETAL_DN3_THYMOCYTE_DN    | 22 | 178 | 16075 | 1305 | 1.539309 | 0.028187 |
| turquoise   | 1991  | ACACTGG,MIR-199A,MIR-199B                   | 47 | 142 | 16111 | 4169 | 1.290361 | 0.028189 |
| turquoise   | 2475  | MORF_TPR                                    | 47 | 142 | 16111 | 4169 | 1.290361 | 0.028189 |
| pink        | 4823  | LIU_PROSTATE_CANCER_UP                      | 4  | 82  | 16171 | 228  | 3.477321 | 0.028203 |
| pink        | 5438  | ROVERSI_GLIOMA_COPY_NUMBER_UP               | 4  | 82  | 16171 | 228  | 3.477321 | 0.028203 |
| brown       | 8642  | GSE14308_TH1_VS_INDUCED_TREG_UP             | 35 | 188 | 16065 | 2190 | 1.381655 | 0.028219 |
| brown       | 9733  | GSE31082_DN_VS_CD4_SP_THYMOCYTE_DN          | 35 | 188 | 16065 | 2190 | 1.381655 | 0.028219 |
| lightgreen  | 8344  | STK33_DN                                    | 3  | 256 | 15997 | 42   | 4.534877 | 0.028236 |
| greenyello  | 7443  | MEISSNER_BRAIN_HCP_WITH_H3K4ME3_AND_H3K27M  | 13 | 779 | 15474 | 150  | 1.808207 | 0.028242 |
| red         | 5188  | CHIARADONNA_NEOPLASTIC_TRANSFORMATION_KRAS  | 9  | 133 | 16120 | 524  | 2.098907 | 0.028324 |
| lightcyan   | 8708  | GSE1460_CORD_VS_ADULT_BLOOD_NAIVE_CD4_TCELL | 3  | 173 | 16080 | 62   | 4.54587  | 0.028357 |
| lightcyan   | 8837  | GSE17721_CTRL_VS_LPS_2H_BMDM_DN             | 3  | 173 | 16080 | 62   | 4.54587  | 0.028357 |

|            |       |                                               |     |      |       |      |          |          |
|------------|-------|-----------------------------------------------|-----|------|-------|------|----------|----------|
| lightcyan  | 8953  | GSE17721_PAM3CSK4_VS_CPG_2H_BMDM_DN           | 3   | 173  | 16080 | 62   | 4.54587  | 0.028357 |
| lightcyan  | 8963  | GSE17721_PAM3CSK4_VS_CPG_16H_BMDM_DN          | 3   | 173  | 16080 | 62   | 4.54587  | 0.028357 |
| brown      | 5797  | LOPEZ_MBD_TARGETS                             | 140 | 893  | 15360 | 2190 | 1.163499 | 0.028369 |
| magenta    | 8299  | MEL18_DN.V1_DN                                | 4   | 112  | 16141 | 167  | 3.475834 | 0.028386 |
| magenta    | 9218  | GSE18791_CTRL_VS_NEWCASTLE_VIRUS_DC_1H_UP     | 4   | 112  | 16141 | 167  | 3.475834 | 0.028386 |
| red        | 4293  | REACTOME_GLYCEROPHOSPHOLIPID_BIOSYNTHESIS     | 6   | 72   | 16181 | 524  | 2.584765 | 0.028426 |
| red        | 7945  | KIM_GLIS2_TARGETS_UP                          | 6   | 72   | 16181 | 524  | 2.584765 | 0.028426 |
| tan        | 4463  | REACTOME_UNFOLDED_PROTEIN_RESPONSE            | 3   | 74   | 16179 | 145  | 4.544175 | 0.02846  |
| tan        | 6800  | DURCHDEWALD_SKIN_CARCINOGENESIS_UP            | 3   | 74   | 16179 | 145  | 4.544175 | 0.02846  |
| purple     | 2234  | CAGCTG_V\$AP4_Q5                              | 19  | 1231 | 15022 | 157  | 1.597826 | 0.028463 |
| magenta    | 9312  | GSE22886_NAIVE_CD4_TCELL_VS_MEMORY_TCELL_UP   | 5   | 166  | 16087 | 167  | 2.931426 | 0.028476 |
| magenta    | 9476  | GSE26495_PD1HIGH_VS_PD1LOW_CD8_TCELL_UP       | 5   | 166  | 16087 | 167  | 2.931426 | 0.028476 |
| brown      | 5623  | MARTORIATI_MDM4_TARGETS_FETAL_LIVER_DN        | 78  | 470  | 15783 | 2190 | 1.231647 | 0.02849  |
| blue       | 5410  | APPIERTO_RESPONSE_TO_FENRETINIDE_UP           | 11  | 33   | 16220 | 2978 | 1.81923  | 0.028508 |
| lightcyan  | 7377  | HOFFMANN_PRE_BI_TO_LARGE_PRE_BII_LYMPHOCYTE   | 2   | 69   | 16184 | 62   | 7.59841  | 0.028519 |
| blue       | 4081  | PID_IL2_STAT5PATHWAY                          | 10  | 29   | 16224 | 2978 | 1.881962 | 0.028526 |
| turquoise  | 6467  | WANG_SMARCE1_TARGETS_DN                       | 100 | 329  | 15924 | 4169 | 1.184966 | 0.028535 |
| brown      | 1563  | V\$SRF_01                                     | 11  | 44   | 16209 | 2190 | 1.855365 | 0.028573 |
| brown      | 3476  | ST_T_CELL_SIGNAL_TRANSDUCTION                 | 11  | 44   | 16209 | 2190 | 1.855365 | 0.028573 |
| brown      | 4047  | PID_IL6_7PATHWAY                              | 11  | 44   | 16209 | 2190 | 1.855365 | 0.028573 |
| brown      | 5604  | HEIDENBLAD_AMPLICON_8Q24_DN                   | 11  | 44   | 16209 | 2190 | 1.855365 | 0.028573 |
| brown      | 5618  | TSUNODA_CISPLATIN_RESISTANCE_DN               | 11  | 44   | 16209 | 2190 | 1.855365 | 0.028573 |
| brown      | 7413  | MELLMAN_TUT1_TARGETS_DN                       | 11  | 44   | 16209 | 2190 | 1.855365 | 0.028573 |
| greenyello | 1822  | V\$TEF1_Q6                                    | 5   | 185  | 16068 | 150  | 2.928468 | 0.028575 |
| greenyello | 9275  | GSE20366_CD103_KLRG1_DP_VS_DN_TREG_DN         | 5   | 185  | 16068 | 150  | 2.928468 | 0.028575 |
| greenyello | 9987  | GSE3982_EOSINOPHIL_VS_NKCELL_DN               | 5   | 185  | 16068 | 150  | 2.928468 | 0.028575 |
| red        | 5914  | STARK_PREFRONTAL_CORTEX_22Q11_DELETION_UP     | 11  | 177  | 16076 | 524  | 1.927621 | 0.028576 |
| red        | 9499  | GSE2706_UNSTIM_VS_2H_R848_DC_DN               | 11  | 177  | 16076 | 524  | 1.927621 | 0.028576 |
| magenta    | 5393  | PEREZ_TP53_TARGETS                            | 17  | 1001 | 15252 | 167  | 1.652844 | 0.028577 |
| turquoise  | 8182  | ZHOU_CELL_CYCLE_GENES_IN_IR_RESPONSE_24HR     | 42  | 125  | 16128 | 4169 | 1.309908 | 0.028604 |
| salmon     | 4183  | REACTOME_CELL_CYCLE                           | 7   | 377  | 15876 | 127  | 2.376219 | 0.028605 |
| greenyello | 1746  | V\$NCX_01                                     | 4   | 125  | 16128 | 150  | 3.467307 | 0.028628 |
| pink       | 688   | HOMEOSTASIS_OF_NUMBER_OF_CELLS                | 2   | 19   | 16234 | 228  | 7.503693 | 0.02864  |
| pink       | 2708  | GNF2_TM4SF2                                   | 2   | 19   | 16234 | 228  | 7.503693 | 0.02864  |
| pink       | 4270  | REACTOME_DOWNREGULATION_OF_SMAD2_3_SMAD       | 2   | 19   | 16234 | 228  | 7.503693 | 0.02864  |
| pink       | 5525  | LA_MEN1_TARGETS                               | 2   | 19   | 16234 | 228  | 7.503693 | 0.02864  |
| pink       | 5725  | TOMLINS_METASTASIS_DN                         | 2   | 19   | 16234 | 228  | 7.503693 | 0.02864  |
| pink       | 7680  | BYSTRYKH_HEMATOPOIESIS_STEM_CELL_SCP2_QTL_TF  | 2   | 19   | 16234 | 228  | 7.503693 | 0.02864  |
| blue       | 1801  | V\$NFMUE1_Q6                                  | 55  | 235  | 16018 | 2978 | 1.277332 | 0.028645 |
| blue       | 4968  | WANG_CLIM2_TARGETS_UP                         | 55  | 235  | 16018 | 2978 | 1.277332 | 0.028645 |
| brown      | 5862  | SCHAEFFER_PROSTATE_DEVELOPMENT_48HR_UP        | 66  | 390  | 15863 | 2190 | 1.25594  | 0.02865  |
| black      | 8732  | GSE15215_CD2_POS_VS_NEG_PDC_UP                | 7   | 169  | 16084 | 283  | 2.378803 | 0.028692 |
| purple     | 3364  | chr3p11                                       | 1   | 3    | 16250 | 157  | 34.50743 | 0.028702 |
| purple     | 5574  | KORKOLA_CHORIOCARCINOMA                       | 1   | 3    | 16250 | 157  | 34.50743 | 0.028702 |
| purple     | 5735  | DIERICK_SEROTONIN_FUNCTION_GENES              | 1   | 3    | 16250 | 157  | 34.50743 | 0.028702 |
| turquoise  | 4434  | REACTOME_M_G1_TRANSITION                      | 28  | 78   | 16175 | 4169 | 1.399475 | 0.028724 |
| red        | 3525  | MODULE_36                                     | 10  | 155  | 16098 | 524  | 2.001108 | 0.028725 |
| purple     | 8684  | GSE1460_INTRATHYMIC_T_PROGENITOR_VS_DP_THYM   | 5   | 177  | 16076 | 157  | 2.924359 | 0.028731 |
| purple     | 8861  | GSE17721_CTRL_VS_POLYIC_12H_BMDM_DN           | 5   | 177  | 16076 | 157  | 2.924359 | 0.028731 |
| grey60     | 5032  | MULLIGHAN_NPM1_MUTATED_SIGNATURE_1_UP         | 3   | 246  | 16007 | 44   | 4.504712 | 0.028769 |
| magenta    | 7371  | SWEET_LUNG_CANCER_KRAS_DN                     | 8   | 351  | 15902 | 167  | 2.218196 | 0.028773 |
| red        | 4160  | REACTOME_GROWTH_HORMONE_RECEPTOR_SIGNALI      | 3   | 21   | 16232 | 524  | 4.431025 | 0.028777 |
| red        | 4777  | REACTOME_CHOLESTEROL_BIOSYNTHESIS             | 3   | 21   | 16232 | 524  | 4.431025 | 0.028777 |
| red        | 7325  | PARK_TRETINOIN_RESPONSE_AND_RARA_PLZF_FUSIOI  | 3   | 21   | 16232 | 524  | 4.431025 | 0.028777 |
| lightcyan  | 8782  | GSE15930_NAIVE_VS_48H_IN_VITRO_STIM_CD8_TCELI | 3   | 174  | 16079 | 62   | 4.519744 | 0.028778 |
| lightcyan  | 9136  | GSE17721_12H_VS_24H_CPG_BMDM_UP               | 3   | 174  | 16079 | 62   | 4.519744 | 0.028778 |
| brown      | 5972  | MORI_SMALL_PRE_BII_LYMPHOCYTE_UP              | 17  | 78   | 16175 | 2190 | 1.617498 | 0.02878  |
| black      | 1926  | V\$CP2_02                                     | 8   | 207  | 16046 | 283  | 2.219559 | 0.028807 |
| blue       | 654   | PROTEOLYSIS                                   | 41  | 168  | 16085 | 2978 | 1.331936 | 0.028808 |
| blue       | 10147 | GSE6566_STRONG_VS_WEAK_DC_STIMULATED_CD4_T    | 41  | 168  | 16085 | 2978 | 1.331936 | 0.028808 |

|             |                                                   |     |     |       |      |          |          |
|-------------|---------------------------------------------------|-----|-----|-------|------|----------|----------|
| brown       | 9488 GSE26928_NAIVE_VS_CENT_MEMORY_CD4_TCELL_UP   | 34  | 182 | 16071 | 2190 | 1.386427 | 0.028875 |
| brown       | 9875 GSE360_L_MAJOR_VS_B_MALAYI_LOW_DOSE_MAC_D    | 34  | 182 | 16071 | 2190 | 1.386427 | 0.028875 |
| lightyellow | 7008 RIGGI_EWING_SARCOMA_PROGENITOR_UP            | 3   | 330 | 15923 | 33   | 4.47741  | 0.028875 |
| salmon      | 32 CHROMATIN                                      | 2   | 34  | 16219 | 127  | 7.528022 | 0.028875 |
| grey60      | 4899 HOOI_ST7_TARGETS_DN                          | 2   | 98  | 16155 | 44   | 7.538497 | 0.02889  |
| pink        | 7406 ZHANG_TLX_TARGETS_36HR_UP                    | 7   | 210 | 16043 | 228  | 2.37617  | 0.028906 |
| yellow      | 63 NADH_DEHYDROGENASE_COMPLEX                     | 4   | 14  | 16239 | 1426 | 3.256462 | 0.028909 |
| yellow      | 126 MITOCHONDRIAL_RESPIRATORY_CHAIN_COMPLEX_I     | 4   | 14  | 16239 | 1426 | 3.256462 | 0.028909 |
| yellow      | 180 PROTON_TRANSPORTING_TWO_SECTOR_ATPASE_COM     | 4   | 14  | 16239 | 1426 | 3.256462 | 0.028909 |
| yellow      | 190 RESPIRATORY_CHAIN_COMPLEX_I                   | 4   | 14  | 16239 | 1426 | 3.256462 | 0.028909 |
| yellow      | 4707 REACTOME_VIRAL_MESSENGER_RNA_SYNTHESIS       | 4   | 14  | 16239 | 1426 | 3.256462 | 0.028909 |
| tan         | 8444 GSE11057_NAIVE_VS_EFF_MEMORY_CD4_TCELL_UP    | 5   | 192 | 16061 | 145  | 2.919001 | 0.028915 |
| tan         | 8625 GSE14000_4H_VS_16H_LPS_DC_DN                 | 5   | 192 | 16061 | 145  | 2.919001 | 0.028915 |
| tan         | 9149 GSE17721_12H_VS_24H_GARDIQUIMOD_BMDM_DN      | 5   | 192 | 16061 | 145  | 2.919001 | 0.028915 |
| tan         | 9979 GSE3982_EOSINOPHIL_VS_BCELL_DN               | 5   | 192 | 16061 | 145  | 2.919001 | 0.028915 |
| greenyello  | 5147 RODRIGUES_THYROID_CARCINOMA_DN               | 3   | 72  | 16181 | 150  | 4.514722 | 0.028927 |
| greenyello  | 6854 GAVIN_FOXP3_TARGETS_CLUSTER_P2               | 3   | 72  | 16181 | 150  | 4.514722 | 0.028927 |
| cyan        | 4897 SAMOLS_TARGETS_OF_KHSV_MIRNAS_DN             | 2   | 56  | 16197 | 77   | 7.538497 | 0.028932 |
| cyan        | 5268 BARIS_THYROID_CANCER_DN                      | 2   | 56  | 16197 | 77   | 7.538497 | 0.028932 |
| salmon      | 7861 CHICAS_RB1_TARGETS_LOW_SERUM                 | 3   | 85  | 16168 | 127  | 4.516813 | 0.02894  |
| brown       | 1098 PHOSPHOTRANSFERASE_ACTIVITY_ALCOHOL_GROUP_I  | 54  | 311 | 15942 | 2190 | 1.288614 | 0.02895  |
| blue        | 7164 BHATI_G2M_ARREST_BY_2METHOXYESTRADIOL_DN     | 29  | 112 | 16141 | 2978 | 1.413152 | 0.028986 |
| pink        | 1792 V\$HNF6_Q6                                   | 6   | 165 | 16088 | 228  | 2.592185 | 0.029004 |
| pink        | 10131 GSE6269_HEALTHY_VS_STREP_AUREUS_INF_PBMC_DN | 6   | 165 | 16088 | 228  | 2.592185 | 0.029004 |
| pink        | 10133 GSE6269_HEALTHY_VS_STREP_PNEUMO_INF_PBMC_D  | 6   | 165 | 16088 | 228  | 2.592185 | 0.029004 |
| red         | 2251 TGATTRY_V\$GFI1_01                           | 12  | 200 | 16053 | 524  | 1.861031 | 0.029008 |
| red         | 9437 GSE24634_NAIVE_CD4_TCELL_VS_DAY7_IL4_CONV_TR | 12  | 200 | 16053 | 524  | 1.861031 | 0.029008 |
| red         | 9911 GSE36476_CTRL_VS_TSST_ACT_40H_MEMORY_CD4_T   | 12  | 200 | 16053 | 524  | 1.861031 | 0.029008 |
| magenta     | 5881 RICKMAN_HEAD_AND_NECK_CANCER_B               | 2   | 26  | 16227 | 167  | 7.486412 | 0.029023 |
| red         | 7370 SWEET_LUNG_CANCER_KRAS_UP                    | 22  | 441 | 15812 | 524  | 1.547342 | 0.02904  |
| lightgreen  | 5189 CHIARADONNA_NEOPLASTIC_TRANSFORMATION_CDC:   | 2   | 103 | 16150 | 42   | 7.514101 | 0.02905  |
| lightgreen  | 8309 CRX_NRL_DN.V1_DN                             | 2   | 103 | 16150 | 42   | 7.514101 | 0.02905  |
| red         | 2054 GTACTGT,MIR-101                              | 13  | 223 | 16030 | 524  | 1.808176 | 0.029057 |
| blue        | 147 DNA_DIRECTED_RNA_POLYMERASEII_HOLOENZYME      | 19  | 67  | 16186 | 2978 | 1.547703 | 0.029078 |
| green       | 9923 GSE37416_CTRL_VS_OH_F_TULARENSIS_LVS_NEUTROP | 17  | 129 | 16124 | 1305 | 1.641278 | 0.029081 |
| tan         | 1876 V\$HNF3_Q6                                   | 4   | 130 | 16123 | 145  | 3.448912 | 0.029119 |
| tan         | 5645 MOHANKUMAR_TLX1_TARGETS_DN                   | 4   | 130 | 16123 | 145  | 3.448912 | 0.029119 |
| magenta     | 1700 V\$NKX61_01                                  | 5   | 167 | 16086 | 167  | 2.913873 | 0.02912  |
| brown       | 5337 DARWICHE_PAPILLOMA_RISK_HIGH_DN              | 30  | 157 | 16096 | 2190 | 1.418114 | 0.029126 |
| greenyello  | 1742 V\$CDC5_01                                   | 5   | 186 | 16067 | 150  | 2.912724 | 0.029154 |
| greenyello  | 1744 V\$PITX2_Q2                                  | 5   | 186 | 16067 | 150  | 2.912724 | 0.029154 |
| brown       | 821 TRANSCRIPTION                                 | 107 | 667 | 15586 | 2190 | 1.190549 | 0.02916  |
| midnightb   | 641 GROWTH                                        | 2   | 61  | 16192 | 71   | 7.505426 | 0.029174 |
| midnightb   | 3961 PID_IL12_2PATHWAY                            | 2   | 61  | 16192 | 71   | 7.505426 | 0.029174 |
| purple      | 7266 BOYLAN_MULTIPLE_MYELOMA_C_D_DN               | 6   | 240 | 16013 | 157  | 2.588057 | 0.029183 |
| greenyello  | 3867 MODULE_458                                   | 2   | 29  | 16224 | 150  | 7.472644 | 0.02919  |
| greenyello  | 7314 MARSHALL_VIRAL_INFECTION_RESPONSE_DN         | 2   | 29  | 16224 | 150  | 7.472644 | 0.02919  |
| greenyello  | 7677 CHIARETTI_T_ALL_REFRACTORY_TO_THERAPY        | 2   | 29  | 16224 | 150  | 7.472644 | 0.02919  |
| lightcyan   | 8887 GSE17721_CTRL_VS_CPG_4H_BMDM_DN              | 3   | 175 | 16078 | 62   | 4.493917 | 0.029202 |
| lightcyan   | 8895 GSE17721_CTRL_VS_CPG_24H_BMDM_DN             | 3   | 175 | 16078 | 62   | 4.493917 | 0.029202 |
| lightcyan   | 9753 GSE32423_CTRL_VS_IL7_IL4_MEMORY_CD8_TCELL_DN | 3   | 175 | 16078 | 62   | 4.493917 | 0.029202 |
| lightcyan   | 9844 GSE360_L_MAJOR_VS_B_MALAYI_LOW_DOSE_DC_UP    | 3   | 175 | 16078 | 62   | 4.493917 | 0.029202 |
| tan         | 913 NEGATIVE_REGULATION_OF_TRANSFERASE_ACTIVITY   | 2   | 30  | 16223 | 145  | 7.472644 | 0.029209 |
| tan         | 7298 PIONTEK_PKD1_TARGETS_UP                      | 2   | 30  | 16223 | 145  | 7.472644 | 0.029209 |
| brown       | 7140 GRADE_COLON_AND_RECTAL_CANCER_DN             | 18  | 84  | 16169 | 2190 | 1.590313 | 0.029231 |
| brown       | 7342 POTTI_TOPOTECAN_SENSITIVITY                  | 24  | 120 | 16133 | 2190 | 1.484292 | 0.029232 |
| turquoise   | 3929 PID_BCR_5PATHWAY                             | 24  | 65  | 16188 | 4169 | 1.43946  | 0.029234 |
| magenta     | 302 CELL_ACTIVATION                               | 3   | 65  | 16188 | 167  | 4.491847 | 0.029261 |
| blue        | 10077 GSE3982_BASOPHIL_VS_NKCELL_DN               | 38  | 154 | 16099 | 2978 | 1.346703 | 0.029261 |
| lightyellow | 225 PLASMA_MEMBRANE_PART                          | 5   | 867 | 15386 | 33   | 2.840341 | 0.029287 |

|             |                                                    |     |      |       |      |          |          |
|-------------|----------------------------------------------------|-----|------|-------|------|----------|----------|
| purple      | 6957 MARTINEZ_RB1_AND_TP53_TARGETS_UP              | 10  | 519  | 15734 | 157  | 1.994649 | 0.0293   |
| pink        | 8351 KRAS.AMP.LUNG_UP.V1_UP                        | 4   | 83   | 16170 | 228  | 3.435426 | 0.029316 |
| blue        | 8388 KAECH_NAIVE_VS_DAY15_EFF_CD8_TCELL_UP         | 46  | 192  | 16061 | 2978 | 1.307571 | 0.029326 |
| blue        | 8580 GSE13485_CTRL_VS_DAY21_YF17D_VACCINE_PBM_U    | 46  | 192  | 16061 | 2978 | 1.307571 | 0.029326 |
| blue        | 9149 GSE17721_12H_VS_24H_GARDIQUIMOD_BMDM_DN       | 46  | 192  | 16061 | 2978 | 1.307571 | 0.029326 |
| lightyellow | 3800 MODULE_356                                    | 2   | 132  | 16121 | 33   | 7.462351 | 0.029331 |
| lightyellow | 6472 RODWELL_AGING_KIDNEY_NO_BLOOD_DN              | 2   | 132  | 16121 | 33   | 7.462351 | 0.029331 |
| greenyello  | 5174 ENK_UV_RESPONSE_EPIDERMIS_DN                  | 9   | 467  | 15786 | 150  | 2.08818  | 0.029332 |
| purple      | 5184 DELYS_THYROID_CANCER_DN                       | 5   | 178  | 16075 | 157  | 2.90793  | 0.029339 |
| purple      | 8195 E2F1_UP.V1_DN                                 | 5   | 178  | 16075 | 157  | 2.90793  | 0.029339 |
| purple      | 9431 GSE24142_ADULT_VS_FETAL_DN3_THYMOCYTE_DN      | 5   | 178  | 16075 | 157  | 2.90793  | 0.029339 |
| cyan        | 6094 SMITH_TERT_TARGETS_UP                         | 3   | 141  | 16112 | 77   | 4.49102  | 0.029341 |
| yellow      | 62 CYTOPLASM                                       | 194 | 1950 | 14303 | 1426 | 1.133917 | 0.02937  |
| red         | 2203 TTANTCA_UNKNOWN                               | 33  | 725  | 15528 | 524  | 1.411816 | 0.029371 |
| grey60      | 440 GLUTAMINE_FAMILY_AMINO_ACID_METABOLIC_PROC     | 1   | 11   | 16242 | 44   | 33.58058 | 0.029388 |
| grey60      | 969 ADENYLATE_CYCLASE_ACTIVATION                   | 1   | 11   | 16242 | 44   | 33.58058 | 0.029388 |
| grey60      | 3729 MODULE_262                                    | 1   | 11   | 16242 | 44   | 33.58058 | 0.029388 |
| grey60      | 4451 REACTOME_P2Y_RECEPTORS                        | 1   | 11   | 16242 | 44   | 33.58058 | 0.029388 |
| grey60      | 6867 MARSON_FOXP3_TARGETS_STIMULATED_DN            | 1   | 11   | 16242 | 44   | 33.58058 | 0.029388 |
| grey60      | 6939 CLAUS_PGR_POSITIVE_MENINGIOMA_DN              | 1   | 11   | 16242 | 44   | 33.58058 | 0.029388 |
| turquoise   | 5064 ODONNELL_TFRC_TARGETS_DN                      | 39  | 115  | 16138 | 4169 | 1.322112 | 0.0294   |
| grey60      | 3187 chr11q12                                      | 2   | 99   | 16154 | 44   | 7.462351 | 0.029436 |
| grey60      | 6049 LE_EGR2_TARGETS_DN                            | 2   | 99   | 16154 | 44   | 7.462351 | 0.029436 |
| pink        | 14 INTRINSIC_TO_PLASMA_MEMBRANE                    | 17  | 733  | 15520 | 228  | 1.653269 | 0.029446 |
| yellow      | 1934 GGCNRNWCTTYS_UNKNOWN                          | 12  | 75   | 16178 | 1426 | 1.823619 | 0.029476 |
| yellow      | 5168 KOKKINAKIS_METHIONINE_DEPRIVATION_96HR_DN     | 12  | 75   | 16178 | 1426 | 1.823619 | 0.029476 |
| blue        | 9813 GSE360_CTRL_VS_B_MALAYI_LOW_DOSE_MAC_DN       | 42  | 173  | 16080 | 2978 | 1.324988 | 0.029479 |
| blue        | 380 INTRACELLULAR_PROTEIN_TRANSPORT                | 35  | 140  | 16113 | 2978 | 1.364422 | 0.029497 |
| black       | 9054 GSE17721_LPS_VS_CPG_24H_BMDM_UP               | 7   | 170  | 16083 | 283  | 2.36481  | 0.029497 |
| brown       | 8974 GSE17721_CPG_VS_GARDIQUIMOD_6H_BMDM_UP        | 33  | 176  | 16077 | 2190 | 1.391524 | 0.02953  |
| blue        | 122 HETEROGENEOUS_NUCLEAR_RIBONUCLEOPROTEIN_CC     | 6   | 14   | 16239 | 2978 | 2.33901  | 0.02954  |
| blue        | 216 ENDOPLASMIC_RETICULUM_LUMEN                    | 6   | 14   | 16239 | 2978 | 2.33901  | 0.02954  |
| blue        | 1299 DNA_DIRECTED_DNA_POLYMERASE_ACTIVITY          | 6   | 14   | 16239 | 2978 | 2.33901  | 0.02954  |
| blue        | 3340 chr11q25                                      | 6   | 14   | 16239 | 2978 | 2.33901  | 0.02954  |
| blue        | 3803 MODULE_360                                    | 6   | 14   | 16239 | 2978 | 2.33901  | 0.02954  |
| lightyellow | 4859 CHEMNITZ_RESPONSE_TO_PROSTAGLANDIN_E2_DN      | 3   | 333  | 15920 | 33   | 4.437073 | 0.029551 |
| turquoise   | 8539 GSE13306_TREG_VS_TCONV_DN                     | 59  | 184  | 16069 | 4169 | 1.250074 | 0.029552 |
| turquoise   | 9204 GSE17974_0.5H_VS_72H_UNTREATED_IN_VITRO_CD4_  | 59  | 184  | 16069 | 4169 | 1.250074 | 0.029552 |
| pink        | 5222 GRAESSMANN_APOPTOSIS_BY_SERUM_DEPRIVATION_    | 7   | 211  | 16042 | 228  | 2.364908 | 0.029555 |
| pink        | 6580 DAZARD_RESPONSE_TO_UV_NHEK_UP                 | 7   | 211  | 16042 | 228  | 2.364908 | 0.029555 |
| lightgreen  | 5073 SENESE_HDAC3_TARGETS_UP                       | 4   | 456  | 15797 | 42   | 3.394528 | 0.029563 |
| brown       | 8639 GSE14308_TH1_VS_TH17_DN                       | 36  | 195  | 16058 | 2190 | 1.370116 | 0.029565 |
| brown       | 9784 GSE339_EX_VIVO_VS_IN_CULTURE_CD4CD8DN_DC_UF   | 36  | 195  | 16058 | 2190 | 1.370116 | 0.029565 |
| turquoise   | 8726 GSE14769_UNSTIM_VS_360MIN_LPS_BMDM_UP         | 63  | 198  | 16055 | 4169 | 1.240444 | 0.029568 |
| turquoise   | 9228 GSE18791_CTRL_VS_NEWCASTLE_VIRUS_DC_10H_UP    | 63  | 198  | 16055 | 4169 | 1.240444 | 0.029568 |
| turquoise   | 9255 GSE19825_NAIVE_VS_DAY3_EFF_CD8_TCELL_DN       | 63  | 198  | 16055 | 4169 | 1.240444 | 0.029568 |
| turquoise   | 9391 GSE22886_NAIVE_CD4_TCELL_VS_12H_ACT_TH1_DN    | 63  | 198  | 16055 | 4169 | 1.240444 | 0.029568 |
| lightgreen  | 1119 PROTEIN_HOMODIMERIZATION_ACTIVITY             | 2   | 104  | 16149 | 42   | 7.44185  | 0.029572 |
| lightgreen  | 9240 GSE18791_UNSTIM_VS_NEWCATSLE_VIRUS_DC_2H_UI   | 2   | 104  | 16149 | 42   | 7.44185  | 0.029572 |
| turquoise   | 9301 GSE2197_IMMUNOSUPPRESSIVE_DNA__VS_UNTREATE    | 61  | 191  | 16062 | 4169 | 1.245082 | 0.029581 |
| turquoise   | 9703 GSE29618_LAIV_VS_TIV_FLU_VACCINE_DAY7_BCELL_D | 61  | 191  | 16062 | 4169 | 1.245082 | 0.029581 |
| red         | 1230 PEPTIDE_BINDING                               | 5   | 54   | 16199 | 524  | 2.871961 | 0.029583 |
| red         | 4114 PID_RAC1_PATHWAY                              | 5   | 54   | 16199 | 524  | 2.871961 | 0.029583 |
| green       | 6288 HALMOS_CEBPA_TARGETS_DN                       | 7   | 38   | 16215 | 1305 | 2.294233 | 0.029608 |
| red         | 1562 V\$SRY_01                                     | 11  | 178  | 16075 | 524  | 1.916792 | 0.029613 |
| red         | 9235 GSE18791_CTRL_VS_NEWCASTLE_VIRUS_DC_16H_DN    | 11  | 178  | 16075 | 524  | 1.916792 | 0.029613 |
| red         | 10183 GSE7460_CTRL_VS_FOXP3_OVEREXPR_TCONV_DN      | 11  | 178  | 16075 | 524  | 1.916792 | 0.029613 |
| brown       | 1634 V\$XBP1_01                                    | 22  | 108  | 16145 | 2190 | 1.511779 | 0.029616 |
| turquoise   | 3806 MODULE_363                                    | 19  | 49   | 16204 | 4169 | 1.511678 | 0.02962  |
| turquoise   | 6295 NADLER_HYPERGLYCEMIA_AT_OBESITY               | 19  | 49   | 16204 | 4169 | 1.511678 | 0.02962  |

|             |                                                   |    |     |       |      |          |          |
|-------------|---------------------------------------------------|----|-----|-------|------|----------|----------|
| turquoise   | 6827 PELLICCIOTTA_HDAC_IN_ANTIGEN_PRESENTATION_DN | 19 | 49  | 16204 | 4169 | 1.511678 | 0.02962  |
| green       | 2857 KEGG_TASTE_TRANSDUCTION                      | 6  | 30  | 16223 | 1305 | 2.490881 | 0.029621 |
| purple      | 3534 MODULE_45                                    | 10 | 520 | 15733 | 157  | 1.990813 | 0.029635 |
| yellow      | 8952 GSE17721_PAM3CSK4_VS_CPG_2H_BMDM_UP          | 22 | 164 | 16089 | 1426 | 1.528948 | 0.029638 |
| pink        | 5159 PROVENZANI_METASTASIS_DN                     | 5  | 123 | 16130 | 228  | 2.897768 | 0.029651 |
| red         | 1668 V\$ETS2_B                                    | 14 | 247 | 16006 | 524  | 1.758059 | 0.029691 |
| turquoise   | 26 MITOCHONDRIAL_PART                             | 46 | 139 | 16114 | 4169 | 1.290163 | 0.029736 |
| purple      | 1268 CHEMOKINE_RECEPTOR_BINDING                   | 2  | 28  | 16225 | 157  | 7.394449 | 0.02974  |
| purple      | 4036 PID_SYNDECAN_4_PATHWAY                       | 2  | 28  | 16225 | 157  | 7.394449 | 0.02974  |
| purple      | 6019 WHITEHURST_PACLITAXEL_SENSITIVITY            | 2  | 28  | 16225 | 157  | 7.394449 | 0.02974  |
| purple      | 6276 GILDEA_METASTASIS                            | 2  | 28  | 16225 | 157  | 7.394449 | 0.02974  |
| purple      | 8138 GENTLES_LEUKEMIC_STEM_CELL_UP                | 2  | 28  | 16225 | 157  | 7.394449 | 0.02974  |
| greenyello  | 1550 V\$OCT1_01                                   | 5  | 187 | 16066 | 150  | 2.897148 | 0.02974  |
| greenyello  | 9768 GSE339_CD4POS_VS_CD8POS_DC_UP                | 5  | 187 | 16066 | 150  | 2.897148 | 0.02974  |
| blue        | 1836 V\$SF1_Q6                                    | 52 | 221 | 16032 | 2978 | 1.284162 | 0.029751 |
| pink        | 1635 V\$TATA_01                                   | 6  | 166 | 16087 | 228  | 2.576569 | 0.029753 |
| pink        | 9603 GSE27786_NKCELL_VS_NEUTROPHIL_DN             | 6  | 166 | 16087 | 228  | 2.576569 | 0.029753 |
| red         | 2843 KEGG_JAK_STAT_SIGNALING_PATHWAY              | 8  | 113 | 16140 | 524  | 2.195906 | 0.02976  |
| red         | 4915 DIAZ_CHRONIC_MEYLOGENOUS_LEUKEMIA_DN         | 8  | 113 | 16140 | 524  | 2.195906 | 0.02976  |
| lightcyan   | 5073 SENESE_HDAC3_TARGETS_UP                      | 5  | 456 | 15797 | 62   | 2.874399 | 0.029773 |
| magenta     | 9276 GSE20366_CD103_POS_VS_CD103_KLRG1_DP_TREG_L  | 5  | 168 | 16085 | 167  | 2.896528 | 0.029773 |
| magenta     | 9294 GSE20715_0H_VS_6H_OZONE_TLR4_KO_LUNG_UP      | 5  | 168 | 16085 | 167  | 2.896528 | 0.029773 |
| yellow      | 8655 GSE14308_NAIVE_CD4_TCELL_VS_NATURAL_TREG_DN  | 25 | 192 | 16061 | 1426 | 1.484065 | 0.029775 |
| yellow      | 9554 GSE27786_LIN_NEG_VS_NKTCELL_UP               | 25 | 192 | 16061 | 1426 | 1.484065 | 0.029775 |
| green       | 2450 MORF_PTPRB                                   | 22 | 179 | 16074 | 1305 | 1.530709 | 0.029794 |
| green       | 4442 REACTOME_TRANSCRIPTION                       | 22 | 179 | 16074 | 1305 | 1.530709 | 0.029794 |
| turquoise   | 4549 REACTOME_METABOLISM_OF_RNA                   | 78 | 251 | 16002 | 4169 | 1.211497 | 0.029806 |
| grey60      | 2278 RGAGGAARY_V\$PU1_Q6                          | 4  | 436 | 15817 | 44   | 3.388866 | 0.02981  |
| brown       | 6806 ZHONG_SECRETOME_OF_LUNG_CANCER_AND_ENDOT     | 14 | 61  | 16192 | 2190 | 1.703286 | 0.029817 |
| salmon      | 1483 AACYNNTTCCS_UNKNOWN                          | 3  | 86  | 16167 | 127  | 4.464292 | 0.029819 |
| red         | 1205 ADENYL_NUCLEOTIDE_BINDING                    | 10 | 156 | 16097 | 524  | 1.98828  | 0.029847 |
| red         | 9272 GSE20366_CD103_POS_VS_NEG_TREG_KLRG1NEG_UP   | 10 | 156 | 16097 | 524  | 1.98828  | 0.029847 |
| red         | 9901 GSE36392_MAC_VS_NEUTROPHIL_IL25_TREATED_LUN  | 10 | 156 | 16097 | 524  | 1.98828  | 0.029847 |
| green       | 8443 GSE10856_CTRL_VS_TNFRSF6B_IN_MACROPHAGE_DN   | 21 | 169 | 16084 | 1305 | 1.547589 | 0.029891 |
| blue        | 2731 KEGG_PYRIMIDINE_METABOLISM                   | 25 | 94  | 16159 | 2978 | 1.451513 | 0.029893 |
| cyan        | 6678 BURTON_ADIPOGENESIS_PEAK_AT_0HR              | 2  | 57  | 16196 | 77   | 7.406243 | 0.029894 |
| lightcyan   | 4919 DEURIG_T_CELL_PROLYMPHOCYTIC_LEUKEMIA_DN     | 4  | 308 | 15945 | 62   | 3.404483 | 0.029895 |
| yellow      | 6171 LE_EGR2_TARGETS_UP                           | 15 | 101 | 16152 | 1426 | 1.692715 | 0.029931 |
| green       | 4670 REACTOME_MEIOTIC_RECOMBINATION               | 9  | 55  | 16198 | 1305 | 2.037994 | 0.029948 |
| purple      | 1514 V\$IK3_01                                    | 5  | 179 | 16074 | 157  | 2.891684 | 0.029955 |
| purple      | 8713 GSE1460_NAIVE_CD4_TCELL_ADULT_BLOOD_VS_THYM  | 5  | 179 | 16074 | 157  | 2.891684 | 0.029955 |
| purple      | 8857 GSE17721_CTRL_VS_POLYIC_6H_BMDM_DN           | 5  | 179 | 16074 | 157  | 2.891684 | 0.029955 |
| purple      | 8905 GSE17721_CTRL_VS_GARDIQUIMOD_6H_BMDM_DN      | 5  | 179 | 16074 | 157  | 2.891684 | 0.029955 |
| purple      | 9009 GSE17721_POLYIC_VS_CPG_4H_BMDM_DN            | 5  | 179 | 16074 | 157  | 2.891684 | 0.029955 |
| purple      | 9338 GSE22886_IGG_IGA_MEMORY_BCELL_VS_BLOOD_PLA'  | 5  | 179 | 16074 | 157  | 2.891684 | 0.029955 |
| magenta     | 1850 V\$ELF1_Q6                                   | 6  | 227 | 16026 | 167  | 2.572423 | 0.029957 |
| lightgreen  | 1315 RECEPTOR_BINDING                             | 3  | 262 | 15991 | 42   | 4.431025 | 0.029958 |
| yellow      | 2585 GNF2_ESPL1                                   | 7  | 35  | 16218 | 1426 | 2.279523 | 0.029979 |
| yellow      | 5993 NIKOLSKY_BREAST_CANCER_7P22_AMPLICON         | 7  | 35  | 16218 | 1426 | 2.279523 | 0.029979 |
| yellow      | 6539 BURTON_ADIPOGENESIS_12                       | 7  | 35  | 16218 | 1426 | 2.279523 | 0.029979 |
| grey60      | 4583 REACTOME_SIGNALING_BY_ILS                    | 2  | 100 | 16153 | 44   | 7.387727 | 0.029985 |
| grey60      | 5642 WOOD_EBV_EBNA1_TARGETS_UP                    | 2  | 100 | 16153 | 44   | 7.387727 | 0.029985 |
| blue        | 409 NUCLEAR_TRANSPORT                             | 23 | 85  | 16168 | 2978 | 1.476787 | 0.030002 |
| red         | 601 REGULATION_OF_CELLULAR_METABOLIC_PROCESS      | 32 | 700 | 15553 | 524  | 1.417928 | 0.030021 |
| green       | 608 INTERLEUKIN_8_PRODUCTION                      | 3  | 9   | 16244 | 1305 | 4.151469 | 0.030039 |
| green       | 683 ESTABLISHMENT_OF_VESICLE_LOCALIZATION         | 3  | 9   | 16244 | 1305 | 4.151469 | 0.030039 |
| green       | 792 PROTEIN_AMINO_ACID_ADP_RIBOSYLATION           | 3  | 9   | 16244 | 1305 | 4.151469 | 0.030039 |
| green       | 878 POSITIVE_REGULATION_OF_ANGIOGENESIS           | 3  | 9   | 16244 | 1305 | 4.151469 | 0.030039 |
| lightyellow | 2773 KEGG_RIBOFLAVIN_METABOLISM                   | 1  | 15  | 16238 | 33   | 32.83434 | 0.03004  |
| lightyellow | 2775 KEGG_PANTOTHENATE_AND_COA_BIOSYNTHESIS       | 1  | 15  | 16238 | 33   | 32.83434 | 0.03004  |

|             |                                                   |    |      |       |      |          |          |
|-------------|---------------------------------------------------|----|------|-------|------|----------|----------|
| lightyellow | 3400 chr8q11                                      | 1  | 15   | 16238 | 33   | 32.83434 | 0.03004  |
| lightyellow | 3752 MODULE_294                                   | 1  | 15   | 16238 | 33   | 32.83434 | 0.03004  |
| lightyellow | 3805 MODULE_362                                   | 1  | 15   | 16238 | 33   | 32.83434 | 0.03004  |
| lightyellow | 4136 REACTOME_BILE_ACID_AND_BILE_SALT_METABOLISM  | 1  | 15   | 16238 | 33   | 32.83434 | 0.03004  |
| lightyellow | 4259 REACTOME_OXYGEN_DEPENDENT_PROLINE_HYDROXY    | 1  | 15   | 16238 | 33   | 32.83434 | 0.03004  |
| lightyellow | 4461 REACTOME_EICOSANOID_LIGAND_BINDING_RECEPTOF  | 1  | 15   | 16238 | 33   | 32.83434 | 0.03004  |
| lightyellow | 4476 REACTOME_CYCLIN_A_B1_ASSOCIATED_EVENTS_DURI  | 1  | 15   | 16238 | 33   | 32.83434 | 0.03004  |
| lightyellow | 5051 TONKS_TARGETS_OF_RUNX1_RUNX1T1_FUSION_ERYTI  | 1  | 15   | 16238 | 33   | 32.83434 | 0.03004  |
| lightyellow | 7548 WANG_RECURRENT_LIVER_CANCER_DN               | 1  | 15   | 16238 | 33   | 32.83434 | 0.03004  |
| blue        | 6668 HEDENFALK_BREAST_CANCER_BRCA1_VS_BRCA2       | 39 | 159  | 16094 | 2978 | 1.338679 | 0.030043 |
| yellow      | 1496 V\$YY1_02                                    | 29 | 230  | 16023 | 1426 | 1.437091 | 0.03005  |
| lightcyan   | 8841 GSE17721_CTRL_VS_LPS_6H_BMDM_DN              | 3  | 177  | 16076 | 62   | 4.443138 | 0.03006  |
| lightcyan   | 8859 GSE17721_CTRL_VS_POLYIC_8H_BMDM_DN           | 3  | 177  | 16076 | 62   | 4.443138 | 0.03006  |
| lightcyan   | 4161 REACTOME_TRIF_MEDIATED_TLR3_SIGNALING        | 2  | 71   | 16182 | 62   | 7.384371 | 0.030063 |
| lightcyan   | 5299 MCBRYAN_PUBERTAL_BREAST_6_7WK_DN             | 2  | 71   | 16182 | 62   | 7.384371 | 0.030063 |
| lightcyan   | 5855 FRIDMAN_SENESCENCE_UP                        | 2  | 71   | 16182 | 62   | 7.384371 | 0.030063 |
| lightcyan   | 6243 ADDYA_ERYTHROID_DIFFERENTIATION_BY_HEMIN     | 2  | 71   | 16182 | 62   | 7.384371 | 0.030063 |
| lightcyan   | 7200 HUANG_DASATINIB_RESISTANCE_UP                | 2  | 71   | 16182 | 62   | 7.384371 | 0.030063 |
| lightcyan   | 7646 BOYLAN_MULTIPLE_MYELOMA_PCA3_UP              | 2  | 71   | 16182 | 62   | 7.384371 | 0.030063 |
| midnightb   | 7743 YAO_TEMPORAL_RESPONSE_TO_PROGESTERONE_CLU!   | 2  | 62   | 16191 | 71   | 7.384371 | 0.030063 |
| cyan        | 4745 REACTOME_ADAPTIVE_IMMUNE_SYSTEM              | 6  | 496  | 15757 | 77   | 2.553362 | 0.030072 |
| black       | 1124 HYDROLASE_ACTIVITY_ACTING_ON_CARBON_NITROGE  | 3  | 39   | 16214 | 283  | 4.417777 | 0.030104 |
| black       | 7186 CHEN_HOXA5_TARGETS_9HR_DN                    | 3  | 39   | 16214 | 283  | 4.417777 | 0.030104 |
| salmon      | 6173 FLECHNER_PBL_KIDNEY_TRANSPLANT_OK_VS_DONOR_  | 4  | 150  | 16103 | 127  | 3.412703 | 0.030106 |
| pink        | 5140 DODD_NASOPHARYNGEAL_CARCINOMA_UP             | 29 | 1439 | 14814 | 228  | 1.4366   | 0.030118 |
| blue        | 1891 V\$LEF1_Q2                                   | 43 | 178  | 16075 | 2978 | 1.318431 | 0.030119 |
| blue        | 8656 GSE14308_INDUCED_VS_NATURAL_TREG_UP          | 43 | 178  | 16075 | 2978 | 1.318431 | 0.030119 |
| blue        | 9038 GSE17721_LPS_VS_CPG_0.5H_BMDM_UP             | 43 | 178  | 16075 | 2978 | 1.318431 | 0.030119 |
| lightcyan   | 5201 BERENJENO_TRANSFORMED_BY_RHOA_REVERSIBLY_U   | 1  | 8    | 16245 | 62   | 32.76815 | 0.030119 |
| lightcyan   | 5553 XU_AKT1_TARGETS_48HR                         | 1  | 8    | 16245 | 62   | 32.76815 | 0.030119 |
| lightcyan   | 6061 LEI_HOXC8_TARGETS_UP                         | 1  | 8    | 16245 | 62   | 32.76815 | 0.030119 |
| lightcyan   | 6758 SASSON_FSH_RESPONSE                          | 1  | 8    | 16245 | 62   | 32.76815 | 0.030119 |
| red         | 6160 FRASOR_RESPONSE_TO ESTRADIOL_DN              | 6  | 73   | 16180 | 524  | 2.549357 | 0.030162 |
| purple      | 4894 ZHOU_INFLAMMATORY_RESPONSE_LIVE_UP           | 8  | 377  | 15876 | 157  | 2.19676  | 0.030175 |
| brown       | 9220 GSE18791_CTRL_VS_NEWCASTLE_VIRUS_DC_2H_UP    | 32 | 170  | 16083 | 2190 | 1.396981 | 0.030184 |
| midnightb   | 3814 MODULE_377                                   | 1  | 7    | 16246 | 71   | 32.70221 | 0.030187 |
| midnightb   | 8033 KUWANO_RNA_STABILIZED_BY_NO                  | 1  | 7    | 16246 | 71   | 32.70221 | 0.030187 |
| purple      | 8159 ACEVEDO_FGFR1_TARGETS_IN_PROSTATE_CANCER_M   | 6  | 242  | 16011 | 157  | 2.566668 | 0.030219 |
| purple      | 540 MONOCARBOXYLIC_ACID_METABOLIC_PROCESS         | 3  | 70   | 16183 | 157  | 4.43667  | 0.030231 |
| purple      | 4455 REACTOME_REGULATION_OF_INSULIN_SECRETION     | 3  | 70   | 16183 | 157  | 4.43667  | 0.030231 |
| salmon      | 1706 V\$E2F1_Q4                                   | 5  | 222  | 16031 | 127  | 2.882351 | 0.030258 |
| grey60      | 7416 SHEDDEN_LUNG_CANCER_GOOD_SURVIVAL_A12        | 3  | 251  | 16002 | 44   | 4.414976 | 0.030285 |
| brown       | 8464 GSE11864_UNTREATED_VS_CSF1_PAM3CYS_IN_MAC_I  | 35 | 189  | 16064 | 2190 | 1.374345 | 0.030291 |
| brown       | 8998 GSE17721_LPS_VS_PAM3CSK4_16H_BMDM_UP         | 35 | 189  | 16064 | 2190 | 1.374345 | 0.030291 |
| brown       | 9031 GSE17721_PAM3CSK4_VS_GADIQUIMOD_8H_BMDM_     | 35 | 189  | 16064 | 2190 | 1.374345 | 0.030291 |
| red         | 7415 HAN_SATB1_TARGETS_DN                         | 20 | 393  | 15860 | 524  | 1.578482 | 0.030307 |
| greenyello  | 10180 GSE7460_WT_VS_FOXP3_HET_ACT_WITH_TGFB_TCON  | 5  | 188  | 16065 | 150  | 2.881738 | 0.030334 |
| midnightb   | 9494 GSE26928_EFF_MEMORY_VS_CXCR5_POS_CD4_TCELL_  | 3  | 155  | 16098 | 71   | 4.430622 | 0.030342 |
| yellow      | 466 CELL_CYCLE_PROCESS                            | 24 | 183  | 16070 | 1426 | 1.494769 | 0.030381 |
| yellow      | 8900 GSE17721_CTRL_VS_GARDIQUIMOD_2H_BMDM_UP      | 24 | 183  | 16070 | 1426 | 1.494769 | 0.030381 |
| yellow      | 9531 GSE27786_LSK_VS_BCELL_DN                     | 24 | 183  | 16070 | 1426 | 1.494769 | 0.030381 |
| turquoise   | 2169 CGTCTTA,MIR-208                              | 5  | 8    | 16245 | 4169 | 2.436586 | 0.030385 |
| turquoise   | 2776 KEGG_FOLATE_BIOSYNTHESIS                     | 5  | 8    | 16245 | 4169 | 2.436586 | 0.030385 |
| turquoise   | 4288 REACTOME_ACYL_CHAIN_REMODELLING_OF_PG        | 5  | 8    | 16245 | 4169 | 2.436586 | 0.030385 |
| turquoise   | 4607 REACTOME_SYNTHESIS_SECRETION_AND_INACTIVATIC | 5  | 8    | 16245 | 4169 | 2.436586 | 0.030385 |
| turquoise   | 7273 REICHERT_G1S_REGULATORS_AS_PI3K_TARGETS      | 5  | 8    | 16245 | 4169 | 2.436586 | 0.030385 |
| turquoise   | 8155 HOLLEMAN_DAUNORUBICIN_ALL_DN                 | 5  | 8    | 16245 | 4169 | 2.436586 | 0.030385 |
| cyan        | 3786 MODULE_334                                   | 3  | 143  | 16110 | 77   | 4.428208 | 0.030414 |
| magenta     | 1769 CTGYNNCTYTAA_UNKNOWN                         | 3  | 66   | 16187 | 167  | 4.423789 | 0.030429 |
| magenta     | 2831 KEGG_ECM_RECEPTOR_INTERACTION                | 3  | 66   | 16187 | 167  | 4.423789 | 0.030429 |



|            |                                                   |     |     |       |      |          |          |
|------------|---------------------------------------------------|-----|-----|-------|------|----------|----------|
| magenta    | 6038 ONDER_CDH1_SIGNALING_VIA_CTNNB1              | 3   | 66  | 16187 | 167  | 4.423789 | 0.030429 |
| magenta    | 8903 GSE17721_CTRL_VS_GARDIQUIMOD_4H_BMDM_DN      | 5   | 169 | 16084 | 167  | 2.879389 | 0.030435 |
| turquoise  | 6344 MENSE_HYPOXIA_UP                             | 33  | 95  | 16158 | 4169 | 1.354229 | 0.030452 |
| pink       | 8069 GUO_TARGETS_OF_IRS1_AND_IRS2                 | 4   | 84  | 16169 | 228  | 3.394528 | 0.030455 |
| salmon     | 435 MICROTUBULE_CYTOSKELETON_ORGANIZATION_AND_    | 2   | 35  | 16218 | 127  | 7.312936 | 0.030471 |
| salmon     | 4410 REACTOME_G1_PHASE                            | 2   | 35  | 16218 | 127  | 7.312936 | 0.030471 |
| salmon     | 5350 HU_ANGIOGENESIS_DN                           | 2   | 35  | 16218 | 127  | 7.312936 | 0.030471 |
| green      | 9634 GSE29614_CTRL_VS_DAY7_TIV_FLU_VACCINE_PBMC_L | 16  | 120 | 16133 | 1305 | 1.660587 | 0.030484 |
| cyan       | 7204 QI_PLASMACYTOMA_UP                           | 4   | 249 | 16004 | 77   | 3.39081  | 0.030495 |
| lightcyan  | 8195 E2F1_UP.V1_DN                                | 3   | 178 | 16075 | 62   | 4.418177 | 0.030495 |
| lightcyan  | 8324 RPS14_DN.V1_UP                               | 3   | 178 | 16075 | 62   | 4.418177 | 0.030495 |
| lightcyan  | 8889 GSE17721_CTRL_VS_CPG_6H_BMDM_DN              | 3   | 178 | 16075 | 62   | 4.418177 | 0.030495 |
| lightcyan  | 8987 GSE17721_LPS_VS_PAM3CSK4_1H_BMDM_DN          | 3   | 178 | 16075 | 62   | 4.418177 | 0.030495 |
| lightcyan  | 9817 GSE360_DC_VS_MAC_DN                          | 3   | 178 | 16075 | 62   | 4.418177 | 0.030495 |
| magenta    | 7723 MIKKELSEN_NPC_WITH_LCP_H3K27ME3              | 1   | 3   | 16250 | 167  | 32.44112 | 0.030511 |
| brown      | 4032 PID_IFNGPATHWAY                              | 10  | 39  | 16214 | 2190 | 1.902939 | 0.030514 |
| brown      | 5722 TOMLINS_PROSTATE_CANCER_UP                   | 10  | 39  | 16214 | 2190 | 1.902939 | 0.030514 |
| brown      | 7279 BOHN_PRIMARY_IMMUNODEFICIENCY_SYNDROM_DN     | 10  | 39  | 16214 | 2190 | 1.902939 | 0.030514 |
| pink       | 9793 GSE360_CTRL_VS_L_DONOVANI_DC_DN              | 6   | 167 | 16086 | 228  | 2.561141 | 0.030514 |
| grey60     | 8129 BOSCO_TH1_CYTOTOXIC_MODULE                   | 2   | 101 | 16152 | 44   | 7.314581 | 0.030539 |
| yellow     | 6504 JIANG_VHL_TARGETS                            | 19  | 137 | 16116 | 1426 | 1.580691 | 0.030542 |
| turquoise  | 5080 TIEN_INTESTINE_PROBIOTICS_2HR_DN             | 30  | 85  | 16168 | 4169 | 1.375954 | 0.030548 |
| turquoise  | 6175 MOOTHA_VOXPHOS                               | 30  | 85  | 16168 | 4169 | 1.375954 | 0.030548 |
| red        | 2043 ATAGGAA,MIR-202                              | 7   | 93  | 16160 | 524  | 2.334626 | 0.03056  |
| purple     | 8589 GSE13485_DAY3_VS_DAY7_YF17D_VACCINE_PBMC_DI  | 5   | 180 | 16073 | 157  | 2.875619 | 0.03058  |
| lightgreen | 92 ENDOCYTIC_VESICLE                              | 1   | 12  | 16241 | 42   | 32.24802 | 0.030583 |
| lightgreen | 708 G_PROTEIN_SIGNALING_ADENYLATE_CYCLASE_ACTIVAT | 1   | 12  | 16241 | 42   | 32.24802 | 0.030583 |
| lightgreen | 948 DNA_DAMAGE_RESPONSESIGNAL_TRANSDUCTION_BY_    | 1   | 12  | 16241 | 42   | 32.24802 | 0.030583 |
| lightgreen | 2909 BIOCARTA_GRANULOCYTES_PATHWAY                | 1   | 12  | 16241 | 42   | 32.24802 | 0.030583 |
| lightgreen | 3672 MODULE_191                                   | 1   | 12  | 16241 | 42   | 32.24802 | 0.030583 |
| lightgreen | 4214 REACTOME_TRAFFICKING_AND_PROCESSING_OF_ENDO  | 1   | 12  | 16241 | 42   | 32.24802 | 0.030583 |
| blue       | 4309 REACTOME_TCR_SIGNALING                       | 15  | 50  | 16203 | 2978 | 1.637307 | 0.030593 |
| blue       | 6396 MARTINEZ_RESPONSE_TO TRABECTEDIN             | 15  | 50  | 16203 | 2978 | 1.637307 | 0.030593 |
| brown      | 725 TRANSPORT                                     | 109 | 682 | 15571 | 2190 | 1.186128 | 0.030613 |
| turquoise  | 6226 FLECHNER_PBL_KIDNEY_TRANSPLANT_REJECTED_VS_C | 23  | 62  | 16191 | 4169 | 1.446231 | 0.030621 |
| purple     | 6719 XU_GH1_AUTOCRINE_TARGETS_DN                  | 4   | 122 | 16131 | 157  | 3.394174 | 0.030623 |
| tan        | 6568 YAMAZAKI_TCEB3_TARGETS_DN                    | 5   | 195 | 16058 | 145  | 2.874094 | 0.030626 |
| red        | 9842 GSE360_L_MAJOR_VS_B_MALAYI_HIGH_DOSE_DC_UP   | 11  | 179 | 16074 | 524  | 1.906083 | 0.030676 |
| red        | 10170 GSE7460_CTRL_VS_TGFB_TREATED_ACT_FOXP3_MUT_ | 11  | 179 | 16074 | 524  | 1.906083 | 0.030676 |
| red        | 10204 GSE7852_LN_VS_THYMUS_TCONV_UP               | 11  | 179 | 16074 | 524  | 1.906083 | 0.030676 |
| turquoise  | 1843 V\$E2F4DP1_01                                | 70  | 223 | 16030 | 4169 | 1.223756 | 0.030676 |
| brown      | 5793 BUYTAERT_PHOTODYNAMIC_THERAPY_STRESS_DN      | 98  | 607 | 15646 | 2190 | 1.198193 | 0.030683 |
| turquoise  | 6730 SESTO_RESPONSE_TO_UV_C5                      | 18  | 46  | 16207 | 4169 | 1.525514 | 0.03071  |
| blue       | 9651 GSE29617_CTRL_VS_DAY7_TIV_FLU_VACCINE_PBMC_2 | 44  | 183 | 16070 | 2978 | 1.312231 | 0.030729 |
| blue       | 9845 GSE360_L_MAJOR_VS_B_MALAYI_LOW_DOSE_DC_DN    | 44  | 183 | 16070 | 2978 | 1.312231 | 0.030729 |
| purple     | 6932 HELLER_SILENCED_BY_METHYLATION_UP            | 6   | 243 | 16010 | 157  | 2.556106 | 0.030746 |
| brown      | 1642 V\$AML1_01                                   | 42  | 234 | 16019 | 2190 | 1.332057 | 0.030753 |
| brown      | 1854 V\$AML1_Q6                                   | 42  | 234 | 16019 | 2190 | 1.332057 | 0.030753 |
| blue       | 3455 SIG_PIP3_SIGNALING_IN_CARDIAC_MYOCYTES       | 18  | 63  | 16190 | 2978 | 1.55934  | 0.030783 |
| blue       | 5166 KOKKINAKIS_METHIONINE_DEPRIVATION_48HR_DN    | 18  | 63  | 16190 | 2978 | 1.55934  | 0.030783 |
| blue       | 6401 LEE_AGING_NEOCORTEX_DN                       | 18  | 63  | 16190 | 2978 | 1.55934  | 0.030783 |
| blue       | 8604 GSE13738_RESTING_VS_BYSTANDER_ACTIVATED_CD4_ | 40  | 164 | 16089 | 2978 | 1.331144 | 0.030789 |
| blue       | 9801 GSE360_CTRL_VS_B_MALAYI_LOW_DOSE_DC_DN       | 40  | 164 | 16089 | 2978 | 1.331144 | 0.030789 |
| blue       | 9841 GSE360_L_MAJOR_VS_T_GONDII_DC_DN             | 40  | 164 | 16089 | 2978 | 1.331144 | 0.030789 |
| blue       | 5805 LOCKWOOD_AMPLIFIED_IN_LUNG_CANCER            | 49  | 207 | 16046 | 2978 | 1.291917 | 0.030831 |
| brown      | 3419 chr12p13                                     | 31  | 164 | 16089 | 2190 | 1.402837 | 0.030833 |
| brown      | 8703 GSE1460_CD4_THYMOCYTE_VS_NAIVE_CD4_TCELL_CC  | 31  | 164 | 16089 | 2190 | 1.402837 | 0.030833 |
| midnightb  | 8336 TGFB_UP.V1_UP                                | 3   | 156 | 16097 | 71   | 4.402221 | 0.030843 |
| midnightb  | 9639 GSE29615_CTRL_VS_DAY3_LAIV_IFLU_VACCINE_PBMC | 3   | 156 | 16097 | 71   | 4.402221 | 0.030843 |
| lightcyan  | 7453 MILI_PSEUDOPODIA_CHEMOTAXIS_UP               | 2   | 72  | 16181 | 62   | 7.28181  | 0.030847 |

|             |                                                   |    |     |       |      |          |          |
|-------------|---------------------------------------------------|----|-----|-------|------|----------|----------|
| green       | 3555 MODULE_66                                    | 46 | 433 | 15820 | 1305 | 1.323101 | 0.030847 |
| greenyello  | 4050 PID_PDGFBRBPATHWAY                           | 4  | 128 | 16125 | 150  | 3.386042 | 0.030862 |
| cyan        | 4464 REACTOME_CLASS_B_2_SECRETIN_FAMILY_RECEPTOR  | 2  | 58  | 16195 | 77   | 7.278549 | 0.030868 |
| cyan        | 4664 REACTOME_RIG_I_MDA5_MEDIATED_INDUCTION_OF    | 2  | 58  | 16195 | 77   | 7.278549 | 0.030868 |
| black       | 2726 KEGG_STEROID_BIOSYNTHESIS                    | 2  | 16  | 16237 | 283  | 7.178887 | 0.03087  |
| salmon      | 3292 chr11p                                       | 1  | 4   | 16249 | 127  | 31.99409 | 0.030894 |
| salmon      | 4732 REACTOME_BINDING_AND_ENTRY_OF_HIV_VIRION     | 1  | 4   | 16249 | 127  | 31.99409 | 0.030894 |
| salmon      | 4977 SMIRNOV_CIRCULATING_ENDOTHELIOCYTES_IN_CANC  | 1  | 4   | 16249 | 127  | 31.99409 | 0.030894 |
| brown       | 484 PHAGOCYTOSIS                                  | 5  | 14  | 16239 | 2190 | 2.650522 | 0.030914 |
| brown       | 772 OXYGEN_AND_REACTIVE_OXYGEN_SPECIES_METABOLI   | 5  | 14  | 16239 | 2190 | 2.650522 | 0.030914 |
| brown       | 965 POSITIVE_REGULATION_OF_SECRETION              | 5  | 14  | 16239 | 2190 | 2.650522 | 0.030914 |
| brown       | 3045 BIOCARTA_PS1_PATHWAY                         | 5  | 14  | 16239 | 2190 | 2.650522 | 0.030914 |
| brown       | 3869 MODULE_462                                   | 5  | 14  | 16239 | 2190 | 2.650522 | 0.030914 |
| brown       | 4017 PID_THROMBIN_PAR4_PATHWAY                    | 5  | 14  | 16239 | 2190 | 2.650522 | 0.030914 |
| brown       | 4242 REACTOME_TGF_BETA_RECEPTOR_SIGNALING_IN_EM1  | 5  | 14  | 16239 | 2190 | 2.650522 | 0.030914 |
| brown       | 4490 REACTOME_SEMA3A_PAK_DEPENDENT_AXON_REPULS    | 5  | 14  | 16239 | 2190 | 2.650522 | 0.030914 |
| brown       | 4689 REACTOME_SOS_MEDIATED_SIGNALLING             | 5  | 14  | 16239 | 2190 | 2.650522 | 0.030914 |
| brown       | 5139 WATANABE_ULCERATIVE_COLITIS_WITH_CANCER_DN   | 5  | 14  | 16239 | 2190 | 2.650522 | 0.030914 |
| brown       | 6671 RAMPON_ENRICHED_LEARNING_ENVIRONMENT_EARL    | 5  | 14  | 16239 | 2190 | 2.650522 | 0.030914 |
| magenta     | 3542 MODULE_53                                    | 8  | 356 | 15897 | 167  | 2.187042 | 0.030921 |
| lightcyan   | 8510 GSE12845_IGD_POS_BLOOD_VS_DARKZONE_GC_TONS   | 3  | 179 | 16074 | 62   | 4.393494 | 0.030932 |
| lightcyan   | 8857 GSE17721_CTRL_VS_POLYIC_6H_BMDM_DN           | 3  | 179 | 16074 | 62   | 4.393494 | 0.030932 |
| lightcyan   | 8905 GSE17721_CTRL_VS_GARDIQUIMOD_6H_BMDM_DN      | 3  | 179 | 16074 | 62   | 4.393494 | 0.030932 |
| lightcyan   | 9338 GSE22886_IGG_IGA_MEMORY_BCELL_VS_BLOOD_PLA   | 3  | 179 | 16074 | 62   | 4.393494 | 0.030932 |
| lightcyan   | 10204 GSE7852_LN_VS_THYMUS_TCONV_UP               | 3  | 179 | 16074 | 62   | 4.393494 | 0.030932 |
| turquoise   | 9820 GSE360_DC_VS_MAC_L_MAJOR_UP                  | 54 | 167 | 16086 | 4169 | 1.260605 | 0.030933 |
| greenyello  | 9278 GSE20366_TREG_VS_NAIVE_CD4_TCELL_UP          | 5  | 189 | 16064 | 150  | 2.86649  | 0.030935 |
| grey60      | 5907 BENPORATH_ES_WITH_H3K27ME3                   | 5  | 654 | 15599 | 44   | 2.824055 | 0.030946 |
| yellow      | 9490 GSE26928_NAIVE_VS_CXCR5_POS_CD4_TCELL_UP     | 23 | 174 | 16079 | 1426 | 1.506581 | 0.03095  |
| yellow      | 9545 GSE27786_LSK_VS_MONO_MAC_DN                  | 23 | 174 | 16079 | 1426 | 1.506581 | 0.03095  |
| cyan        | 6320 PETROVA_ENDOTHELIUM_LYMPHATIC_VS_BLOOD_DN    | 3  | 144 | 16109 | 77   | 4.397457 | 0.030958 |
| midnightb   | 2634 GNF2_DDX5                                    | 2  | 63  | 16190 | 71   | 7.267159 | 0.030962 |
| midnightb   | 3303 chr3p25                                      | 2  | 63  | 16190 | 71   | 7.267159 | 0.030962 |
| midnightb   | 3885 MODULE_493                                   | 2  | 63  | 16190 | 71   | 7.267159 | 0.030962 |
| turquoise   | 5130 BIDUS_METASTASIS_UP                          | 66 | 209 | 16044 | 4169 | 1.231117 | 0.030967 |
| brown       | 8355 TBK1.DF_UP                                   | 48 | 273 | 15980 | 2190 | 1.304872 | 0.030976 |
| lightyellow | 8548 GSE13411_NAIVE_VS_SWITCHED_MEMORY_BCELL_UP   | 2  | 136 | 16117 | 33   | 7.24287  | 0.030987 |
| red         | 1545 V\$HNF3B_01                                  | 10 | 157 | 16096 | 524  | 1.975616 | 0.030999 |
| red         | 9969 GSE3982_MAC_VS_NEUTROPHIL_LPS_STIM_DN        | 10 | 157 | 16096 | 524  | 1.975616 | 0.030999 |
| red         | 4981 OSMAN_BLADDER_CANCER_UP                      | 20 | 394 | 15859 | 524  | 1.574476 | 0.031009 |
| brown       | 9051 GSE17721_LPS_VS_CPG_12H_BMDM_DN              | 34 | 183 | 16070 | 2190 | 1.378851 | 0.031024 |
| tan         | 3236 chr13q34                                     | 2  | 31  | 16222 | 145  | 7.231591 | 0.031044 |
| tan         | 3745 MODULE_286                                   | 2  | 31  | 16222 | 145  | 7.231591 | 0.031044 |
| tan         | 4761 REACTOME_PACKAGING_OF_TELOMERE_ENDS          | 2  | 31  | 16222 | 145  | 7.231591 | 0.031044 |
| tan         | 6974 YOKOE_CANCER_TESTIS_ANTIGENS                 | 2  | 31  | 16222 | 145  | 7.231591 | 0.031044 |
| cyan        | 7034 ACEVEDO_LIVER_CANCER_UP                      | 9  | 929 | 15324 | 77   | 2.044888 | 0.031073 |
| greenyello  | 3540 MODULE_51                                    | 2  | 30  | 16223 | 150  | 7.223556 | 0.031089 |
| greenyello  | 3730 MODULE_263                                   | 2  | 30  | 16223 | 150  | 7.223556 | 0.031089 |
| greenyello  | 6239 NAKAJIMA_EOSINOPHIL                          | 2  | 30  | 16223 | 150  | 7.223556 | 0.031089 |
| greenyello  | 8175 GHANDHI_DIRECT_IRRADIATION_DN                | 2  | 30  | 16223 | 150  | 7.223556 | 0.031089 |
| magenta     | 7524 CHIANG_LIVER_CANCER_SUBCLASS_PROLIFERATION_U | 5  | 170 | 16083 | 167  | 2.862452 | 0.031107 |
| midnightb   | 1948 GTGCAAT,MIR-25,MIR-32,MIR-92,MIR-363,MIR-367 | 4  | 272 | 15981 | 71   | 3.366404 | 0.031123 |
| turquoise   | 2349 MORF_ANP32B                                  | 62 | 195 | 16058 | 4169 | 1.239535 | 0.031129 |
| turquoise   | 8971 GSE17721_CPG_VS_GARDIQUIMOD_2H_BMDM_DN       | 62 | 195 | 16058 | 4169 | 1.239535 | 0.031129 |
| turquoise   | 9784 GSE339_EX_VIVO_VS_IN_CULTURE_CD4CD8DN_DC_UF  | 62 | 195 | 16058 | 4169 | 1.239535 | 0.031129 |
| turquoise   | 8613 GSE14000_TRANSLATED_RNA_VS_MRNA_16H_LPS_DC   | 58 | 181 | 16072 | 4169 | 1.249255 | 0.031131 |
| turquoise   | 9704 GSE29618_LAIV_VS_TIV_FLU_VACCINE_DAY7_MONOC  | 58 | 181 | 16072 | 4169 | 1.249255 | 0.031131 |
| turquoise   | 10008 GSE3982_MAST_CELL_VS_TH1_UP                 | 58 | 181 | 16072 | 4169 | 1.249255 | 0.031131 |
| turquoise   | 10101 GSE39820_CTRL_VS_IL1B_IL6_CD4_TCELL_DN      | 58 | 181 | 16072 | 4169 | 1.249255 | 0.031131 |
| magenta     | 135 LIPID_RAFT                                    | 2  | 27  | 16226 | 167  | 7.209137 | 0.031137 |

|             |       |                                              |    |     |       |      |          |          |
|-------------|-------|----------------------------------------------|----|-----|-------|------|----------|----------|
| magenta     | 909   | RESPONSE_TO_HORMONE_STIMULUS                 | 2  | 27  | 16226 | 167  | 7.209137 | 0.031137 |
| magenta     | 3380  | chr2p16                                      | 2  | 27  | 16226 | 167  | 7.209137 | 0.031137 |
| magenta     | 4744  | REACTOME_VOLTAGE_GATED_POTASSIUM_CHANNELS    | 2  | 27  | 16226 | 167  | 7.209137 | 0.031137 |
| magenta     | 5959  | SHIN_B_CELL_LYMPHOMA_CLUSTER_2               | 2  | 27  | 16226 | 167  | 7.209137 | 0.031137 |
| red         | 2227  | YTAAYNGCT_UNKNOWN                            | 8  | 114 | 16139 | 524  | 2.176644 | 0.031143 |
| red         | 5851  | RICKMAN_TUMOR_DIFFERENTIATED_MODERATELY_VS   | 8  | 114 | 16139 | 524  | 2.176644 | 0.031143 |
| turquoise   | 8850  | GSE17721_CTRL_VS_POLYIC_1H_BMDM_UP           | 60 | 188 | 16065 | 4169 | 1.244214 | 0.031152 |
| brown       | 5188  | CHIARADONNA_NEOPLASTIC_TRANSFORMATION_KRAS   | 26 | 133 | 16120 | 2190 | 1.450812 | 0.031154 |
| black       | 5903  | BENPORATH_SOX2_TARGETS                       | 19 | 685 | 15568 | 283  | 1.592979 | 0.031198 |
| tan         | 9230  | GSE18791_CTRL_VS_NEWCASTLE_VIRUS_DC_12H_UP   | 5  | 196 | 16057 | 145  | 2.85943  | 0.03121  |
| purple      | 9259  | GSE20366_TREG_VS_TCONV_DN                    | 5  | 181 | 16072 | 157  | 2.859732 | 0.031212 |
| grey60      | 2273  | YATGNWAAT_V\$OCT_C                           | 3  | 254 | 15999 | 44   | 4.362831 | 0.031214 |
| green       | 9416  | GSE24142_EARLY_THYMIC_PROGENITOR_VS_DN3_THY  | 23 | 190 | 16063 | 1305 | 1.507639 | 0.031232 |
| brown       | 6242  | SANSOM_APC_TARGETS_DN                        | 55 | 319 | 15934 | 2190 | 1.279562 | 0.031273 |
| greenyello  | 5863  | SCHAEFFER_PROSTATE_DEVELOPMENT_48HR_DN       | 7  | 325 | 15928 | 150  | 2.333764 | 0.031282 |
| blue        | 1919  | V\$SP1_Q2_01                                 | 50 | 212 | 16041 | 2978 | 1.287191 | 0.031286 |
| pink        | 325   | COFACTOR_METABOLIC_PROCESS                   | 3  | 49  | 16204 | 228  | 4.364393 | 0.031288 |
| pink        | 5978  | MORI_PLASMA_CELL_UP                          | 3  | 49  | 16204 | 228  | 4.364393 | 0.031288 |
| pink        | 7873  | DEMAGALHAES_AGING_UP                         | 3  | 49  | 16204 | 228  | 4.364393 | 0.031288 |
| yellow      | 7035  | ACEVEDO_LIVER_CANCER_DN                      | 52 | 457 | 15796 | 1426 | 1.296884 | 0.031289 |
| tan         | 7060  | SMID_BREAST_CANCER_LUMINAL_B_UP              | 4  | 133 | 16120 | 145  | 3.371117 | 0.031298 |
| blue        | 9858  | GSE360_LOW_DOSE_B_MALAYI_VS_M_TUBERCULOSIS   | 45 | 188 | 16065 | 2978 | 1.306362 | 0.03131  |
| brown       | 459   | DEFENSE_RESPONSE                             | 39 | 215 | 16038 | 2190 | 1.346219 | 0.031315 |
| purple      | 3926  | PID_SMAD2_3NUCLEARPATHWAY                    | 3  | 71  | 16182 | 157  | 4.374181 | 0.031348 |
| purple      | 4884  | TURASHVILI_BREAST_LOBULAR_CARCINOMA_VS_LOBL  | 3  | 71  | 16182 | 157  | 4.374181 | 0.031348 |
| magenta     | 6652  | CUI_TCF21_TARGETS_2_UP                       | 8  | 357 | 15896 | 167  | 2.180915 | 0.031363 |
| turquoise   | 1224  | PHOSPHORIC_ESTER_HYDROLASE_ACTIVITY          | 45 | 136 | 16117 | 4169 | 1.289957 | 0.031372 |
| turquoise   | 1289  | TRANSCRIPTION_REPRESSOR_ACTIVITY             | 45 | 136 | 16117 | 4169 | 1.289957 | 0.031372 |
| lightcyan   | 8738  | GSE15324_ELF4_KO_VS_WT_NAIVE_CD8_TCELL_UP    | 3  | 180 | 16073 | 62   | 4.369086 | 0.031373 |
| lightcyan   | 8955  | GSE17721_PAM3CSK4_VS_CPG_4H_BMDM_DN          | 3  | 180 | 16073 | 62   | 4.369086 | 0.031373 |
| lightcyan   | 9783  | GSE339_EX_VIVO_VS_IN_CULTURE_CD8POS_DC_DN    | 3  | 180 | 16073 | 62   | 4.369086 | 0.031373 |
| turquoise   | 1159  | MICROTUBULE_MOTOR_ACTIVITY                   | 8  | 16  | 16237 | 4169 | 1.949268 | 0.031391 |
| turquoise   | 2082  | CTACTAG,MIR-325                              | 8  | 16  | 16237 | 4169 | 1.949268 | 0.031391 |
| turquoise   | 4147  | REACTOME_CTNNB1_PHOSPHORYLATION_CASCADE      | 8  | 16  | 16237 | 4169 | 1.949268 | 0.031391 |
| turquoise   | 4567  | REACTOME_JNK_C_JUN_KINASES_PHOSPHORYLATION   | 8  | 16  | 16237 | 4169 | 1.949268 | 0.031391 |
| turquoise   | 5513  | FARMER_BREAST_CANCER_CLUSTER_6               | 8  | 16  | 16237 | 4169 | 1.949268 | 0.031391 |
| turquoise   | 6756  | CARDOSO_RESPONSE_TO_GAMMA_RADIATION_AND      | 8  | 16  | 16237 | 4169 | 1.949268 | 0.031391 |
| yellow      | 583   | ELECTRON_TRANSPORT_GO_0006118                | 8  | 43  | 16210 | 1426 | 2.120487 | 0.031397 |
| yellow      | 5275  | KERLEY_RESPONSE_TO_CISPLATIN_UP              | 8  | 43  | 16210 | 1426 | 2.120487 | 0.031397 |
| lightyellow | 1384  | PEPTIDASE_ACTIVITY                           | 2  | 137 | 16116 | 33   | 7.190002 | 0.031407 |
| lightyellow | 9896  | GSE36392_EOSINOPHIL_VS_MAC_IL25_TREATED_LUNC | 2  | 137 | 16116 | 33   | 7.190002 | 0.031407 |
| purple      | 6283  | BROWN_MYELOID_CELL_DEVELOPMENT_DN            | 4  | 123 | 16130 | 157  | 3.366579 | 0.031422 |
| purple      | 6807  | ZHONG_SECRETOME_OF_LUNG_CANCER_AND_FIBROB    | 4  | 123 | 16130 | 157  | 3.366579 | 0.031422 |
| yellow      | 9731  | GSE31082_DN_VS_DP_THYMOCYTE_DN               | 25 | 193 | 16060 | 1426 | 1.476375 | 0.031464 |
| yellow      | 10187 | GSE7764_NKCELL_VS_SPLENOCYTE_DN              | 25 | 193 | 16060 | 1426 | 1.476375 | 0.031464 |
| red         | 5175  | ENK_UV_RESPONSE_KERATINOCYTE_UP              | 23 | 470 | 15783 | 524  | 1.517862 | 0.031475 |
| midnightb   | 7139  | GRADE_COLON_AND_RECTAL_CANCER_UP             | 4  | 273 | 15980 | 71   | 3.354073 | 0.031485 |
| cyan        | 5773  | GROSS_HYPOXIA_VIA_ELK3_DN                    | 3  | 145 | 16108 | 77   | 4.367129 | 0.031507 |
| cyan        | 7580  | MIKKELSEN_IPS_LCP_WITH_H3K4ME3               | 3  | 145 | 16108 | 77   | 4.367129 | 0.031507 |
| pink        | 1994  | CGCTGCT,MIR-503                              | 2  | 20  | 16233 | 228  | 7.128509 | 0.031533 |
| pink        | 4586  | REACTOME_INTERACTION_BETWEEN_L1_AND_ANKYRI   | 2  | 20  | 16233 | 228  | 7.128509 | 0.031533 |
| pink        | 5704  | HATADA_METHYLATED_IN_LUNG_CANCER_DN          | 2  | 20  | 16233 | 228  | 7.128509 | 0.031533 |
| pink        | 6966  | WALLACE_PROSTATE_CANCER_UP                   | 2  | 20  | 16233 | 228  | 7.128509 | 0.031533 |
| pink        | 7570  | MIKKELSEN_MEF_ICP_WITH_H3K4ME3_AND_H3K27MI   | 2  | 20  | 16233 | 228  | 7.128509 | 0.031533 |
| greenyello  | 1547  | V\$TST1_01                                   | 5  | 190 | 16063 | 150  | 2.851404 | 0.031543 |
| greenyello  | 1781  | V\$CEBPDELTA_Q6                              | 5  | 190 | 16063 | 150  | 2.851404 | 0.031543 |
| greenyello  | 1840  | V\$CIZ_01                                    | 5  | 190 | 16063 | 150  | 2.851404 | 0.031543 |
| greenyello  | 8544  | GSE13306_RA_VS_UNTREATED_MEM_CD4_TCELL_UP    | 5  | 190 | 16063 | 150  | 2.851404 | 0.031543 |
| turquoise   | 8355  | TBK1.DF_UP                                   | 84 | 273 | 15980 | 4169 | 1.19955  | 0.031569 |
| blue        | 2220  | YGCGYRCGC_UNKNOWN                            | 66 | 290 | 15963 | 2978 | 1.242095 | 0.031589 |

|             |                                                    |     |     |       |      |          |          |
|-------------|----------------------------------------------------|-----|-----|-------|------|----------|----------|
| brown       | 1811 V\$TEL2_Q6                                    | 41  | 228 | 16025 | 2190 | 1.334561 | 0.031619 |
| pink        | 8174 GHANDHI_DIRECT_IRRADIATION_UP                 | 4   | 85  | 16168 | 228  | 3.354592 | 0.03162  |
| magenta     | 5718 SHETH_LIVER_CANCER_VS_TXNIP_LOSS_PAM5         | 3   | 67  | 16186 | 167  | 4.357762 | 0.031622 |
| greenyello  | 8301 PTEN_DN.V1_DN                                 | 4   | 129 | 16124 | 150  | 3.359793 | 0.031629 |
| greenyello  | 9354 GSE22886_NEUTROPHIL_VS_MONOCYTE_UP            | 4   | 129 | 16124 | 150  | 3.359793 | 0.031629 |
| greenyello  | 9688 GSE29618_PRE_VS_DAY7_POST_TIV_FLU_VACCINE_BC  | 4   | 129 | 16124 | 150  | 3.359793 | 0.031629 |
| lightcyan   | 6805 ZHONG_SECRETOME_OF_LUNG_CANCER_AND_MACRC      | 2   | 73  | 16180 | 62   | 7.182059 | 0.031639 |
| blue        | 400 NEGATIVE_REGULATION_OF_CELL_CYCLE              | 20  | 72  | 16181 | 2978 | 1.516025 | 0.031651 |
| blue        | 1611 V\$SREBP1_Q2                                  | 20  | 72  | 16181 | 2978 | 1.516025 | 0.031651 |
| blue        | 2659 GNF2_KPNB1                                    | 20  | 72  | 16181 | 2978 | 1.516025 | 0.031651 |
| grey60      | 8282 PTEN_DN.V2_UP                                 | 2   | 103 | 16150 | 44   | 7.172551 | 0.031659 |
| green       | 1575 V\$AP1_Q6                                     | 26  | 221 | 16032 | 1305 | 1.465224 | 0.031661 |
| brown       | 8623 GSE14000_4H_VS_16H_LPS_DC_TRANSLATED_RNA_DN   | 36  | 196 | 16057 | 2190 | 1.363126 | 0.031674 |
| brown       | 9083 GSE17721_LPS_VS_GARDIQUIMOD_6H_BMDM_DN        | 36  | 196 | 16057 | 2190 | 1.363126 | 0.031674 |
| brown       | 9936 GSE37416_0H_VS_6H_F_TULARENSIS_LVS_NEUTROPH   | 36  | 196 | 16057 | 2190 | 1.363126 | 0.031674 |
| brown       | 5030 RHEIN_ALL_GLUCOCORTICOID_THERAPY_UP           | 16  | 73  | 16180 | 2190 | 1.626622 | 0.031676 |
| red         | 7753 NAKAMURA_ADIPOGENESIS_EARLY_UP                | 5   | 55  | 16198 | 524  | 2.819743 | 0.031711 |
| red         | 7915 WIERENGA_STAT5A_TARGETS_GROUP2                | 5   | 55  | 16198 | 524  | 2.819743 | 0.031711 |
| red         | 7928 JOHNSTONE_PARVB_TARGETS_1_DN                  | 5   | 55  | 16198 | 524  | 2.819743 | 0.031711 |
| magenta     | 853 CHEMICAL_HOMEOSTASIS                           | 4   | 116 | 16137 | 167  | 3.355978 | 0.031723 |
| magenta     | 2175 RTTTNNNYTGGM_UNKNOWN                          | 4   | 116 | 16137 | 167  | 3.355978 | 0.031723 |
| magenta     | 7093 IZADPANAHA_STEM_CELL_ADIPOSE_VS_BONE_UP       | 4   | 116 | 16137 | 167  | 3.355978 | 0.031723 |
| yellow      | 6521 NATSUME_RESPONSE_TO_INTERFERON_BETA_DN        | 9   | 51  | 16202 | 1426 | 2.011344 | 0.031731 |
| purple      | 3962 PID_S1P_S1P3_PATHWAY                          | 2   | 29  | 16224 | 157  | 7.139468 | 0.031744 |
| purple      | 4111 PID_ALPHASYNUCLEIN_PATHWAY                    | 2   | 29  | 16224 | 157  | 7.139468 | 0.031744 |
| purple      | 4569 REACTOME_THROMBIN_SIGNALLING_THROUGH_PROT     | 2   | 29  | 16224 | 157  | 7.139468 | 0.031744 |
| purple      | 8122 YU_BAP1_TARGETS                               | 2   | 29  | 16224 | 157  | 7.139468 | 0.031744 |
| red         | 8355 TBK1.DF_UP                                    | 15  | 273 | 15980 | 524  | 1.70424  | 0.031746 |
| yellow      | 8103 REICHERT_MITOSIS_LIN9_TARGETS                 | 6   | 28  | 16225 | 1426 | 2.442346 | 0.031747 |
| turquoise   | 706 MRNA_PROCESSING_GO_0006397                     | 26  | 72  | 16181 | 4169 | 1.407805 | 0.031748 |
| turquoise   | 7453 MILI_PSEUDOPODIA_CHEMOTAXIS_UP                | 26  | 72  | 16181 | 4169 | 1.407805 | 0.031748 |
| brown       | 9503 GSE2706_UNSTIM_VS_2H_LPS_DC_DN                | 33  | 177 | 16076 | 2190 | 1.383662 | 0.031759 |
| brown       | 9990 GSE3982_EOSINOPHIL_VS_TH2_UP                  | 33  | 177 | 16076 | 2190 | 1.383662 | 0.031759 |
| turquoise   | 5066 ODONNELL_TARGETS_OF_MYC_AND_TFRC_DN           | 17  | 43  | 16210 | 4169 | 1.541282 | 0.031766 |
| turquoise   | 6273 HOFMANN_CELL_LYMPHOMA_UP                      | 17  | 43  | 16210 | 4169 | 1.541282 | 0.031766 |
| red         | 1589 V\$CEBP_Q2                                    | 11  | 180 | 16073 | 524  | 1.895494 | 0.031766 |
| red         | 9289 GSE20715_0H_VS_6H_OZONE_LUNG_DN               | 11  | 180 | 16073 | 524  | 1.895494 | 0.031766 |
| red         | 10292 GSE9988_ANTI_TREM1_AND_LPS_VS_CTRL_TREATED_I | 11  | 180 | 16073 | 524  | 1.895494 | 0.031766 |
| yellow      | 707 MACROMOLECULE_BIOSYNTHETIC_PROCESS             | 35  | 289 | 15964 | 1426 | 1.380334 | 0.031771 |
| magenta     | 4368 REACTOME_CLASS_A1_RHODOPSIN_LIKE_RECEPTORS    | 5   | 171 | 16082 | 167  | 2.845712 | 0.031788 |
| magenta     | 10136 GSE6269_FLU_VS_STREP_AUREUS_INF_PBMIC_UP     | 5   | 171 | 16082 | 167  | 2.845712 | 0.031788 |
| tan         | 8398 GOLDRATH_NAIVE_VS_EFF_CD8_TCELL_UP            | 5   | 197 | 16056 | 145  | 2.844915 | 0.031802 |
| brown       | 2245 TGACCTY_V\$ERR1_Q2                            | 135 | 862 | 15391 | 2190 | 1.162294 | 0.031806 |
| lightcyan   | 8778 GSE15930_NAIVE_VS_24H_IN_VITRO_STIM_IL12_CD8_ | 3   | 181 | 16072 | 62   | 4.344947 | 0.031817 |
| lightcyan   | 9080 GSE17721_LPS_VS_GARDIQUIMOD_4H_BMDM_UP        | 3   | 181 | 16072 | 62   | 4.344947 | 0.031817 |
| blue        | 9290 GSE20715_0H_VS_24H_OZONE_LUNG_UP              | 46  | 193 | 16060 | 2978 | 1.300797 | 0.031864 |
| blue        | 9464 GSE25087_FETAL_VS_ADULT_TREG_UP               | 46  | 193 | 16060 | 2978 | 1.300797 | 0.031864 |
| blue        | 9676 GSE29618_PDC_VS_MDC_DAY7_FLU_VACCINE_UP       | 46  | 193 | 16060 | 2978 | 1.300797 | 0.031864 |
| midnightb   | 4883 TURASHVILI_BREAST_LOBULAR_CARCINOMA_VS_DUCT   | 2   | 64  | 16189 | 71   | 7.153609 | 0.031872 |
| lightgreen  | 5174 ENK_UV_RESPONSE_EPIDERMIS_DN                  | 4   | 467 | 15786 | 42   | 3.314571 | 0.031879 |
| red         | 3715 MODULE_243                                    | 6   | 74  | 16179 | 524  | 2.514906 | 0.031965 |
| red         | 7264 BOYLAN_MULTIPLE_MYELOMA_D_DN                  | 6   | 74  | 16179 | 524  | 2.514906 | 0.031965 |
| blue        | 4141 REACTOME_METABOLISM_OF_NON_CODING_RNA         | 14  | 46  | 16207 | 2978 | 1.661036 | 0.031968 |
| blue        | 7303 FRASOR_RESPONSE_TO_SERM_OR_FULVESTANT_DN      | 14  | 46  | 16207 | 2978 | 1.661036 | 0.031968 |
| blue        | 6069 UEDA_CENTRAL_CLOCK                            | 22  | 81  | 16172 | 2978 | 1.482335 | 0.03198  |
| lightyellow | 221 INTEGRIN_COMPLEX                               | 1   | 16  | 16237 | 33   | 30.7822  | 0.032011 |
| lightyellow | 3492 SA_TRKA_RECEPTOR                              | 1   | 16  | 16237 | 33   | 30.7822  | 0.032011 |
| lightyellow | 3845 MODULE_424                                    | 1   | 16  | 16237 | 33   | 30.7822  | 0.032011 |
| lightyellow | 4233 REACTOME_ARMS_MEDIATED_ACTIVATION             | 1   | 16  | 16237 | 33   | 30.7822  | 0.032011 |
| lightyellow | 5320 ZIRN_TRETINOIN_RESPONSE_UP                    | 1   | 16  | 16237 | 33   | 30.7822  | 0.032011 |

|             |                                                      |    |     |       |      |          |          |
|-------------|------------------------------------------------------|----|-----|-------|------|----------|----------|
| lightyellow | 5462 MYLLYKANGAS_AMPLIFICATION_HOT_SPOT_17           | 1  | 16  | 16237 | 33   | 30.7822  | 0.032011 |
| lightyellow | 6607 DAZARD_UV_RESPONSE_CLUSTER_G4                   | 1  | 16  | 16237 | 33   | 30.7822  | 0.032011 |
| lightyellow | 6718 NIELSEN_LEIOMYOSARCOMA_CNN1_UP                  | 1  | 16  | 16237 | 33   | 30.7822  | 0.032011 |
| grey60      | 271 BIOGENIC_AMINE_METABOLIC_PROCESS                 | 1  | 12  | 16241 | 44   | 30.7822  | 0.032018 |
| grey60      | 708 G_PROTEIN_SIGNALING_ADENYLATE_CYCLASE_ACTIVATION | 1  | 12  | 16241 | 44   | 30.7822  | 0.032018 |
| grey60      | 1161 OXIDOREDUCTASE_ACTIVITY_ACTING_ON_PEROXIDE_F    | 1  | 12  | 16241 | 44   | 30.7822  | 0.032018 |
| grey60      | 3633 MODULE_148                                      | 1  | 12  | 16241 | 44   | 30.7822  | 0.032018 |
| grey60      | 3672 MODULE_191                                      | 1  | 12  | 16241 | 44   | 30.7822  | 0.032018 |
| grey60      | 3778 MODULE_326                                      | 1  | 12  | 16241 | 44   | 30.7822  | 0.032018 |
| grey60      | 3850 MODULE_431                                      | 1  | 12  | 16241 | 44   | 30.7822  | 0.032018 |
| grey60      | 3912 MODULE_545                                      | 1  | 12  | 16241 | 44   | 30.7822  | 0.032018 |
| grey60      | 3916 MODULE_560                                      | 1  | 12  | 16241 | 44   | 30.7822  | 0.032018 |
| grey60      | 6690 NIELSEN_SCHWANNOMA_UP                           | 1  | 12  | 16241 | 44   | 30.7822  | 0.032018 |
| grey60      | 7089 WEBER_METHYLATED_HCP_IN_SPERM_UP                | 1  | 12  | 16241 | 44   | 30.7822  | 0.032018 |
| grey60      | 7323 PARK_TRETINOIN_RESPONSE                         | 1  | 12  | 16241 | 44   | 30.7822  | 0.032018 |
| grey60      | 7327 WU_ALZHEIMER_DISEASE_UP                         | 1  | 12  | 16241 | 44   | 30.7822  | 0.032018 |
| grey60      | 7830 WANG_METASTASIS_OF_BREAST_CANCER                | 1  | 12  | 16241 | 44   | 30.7822  | 0.032018 |
| yellow      | 1092 DAMAGED_DNA_BINDING                             | 5  | 21  | 16232 | 1426 | 2.713718 | 0.032029 |
| yellow      | 5090 SABATES_COLORECTAL_ADENOMA_SIZE_UP              | 5  | 21  | 16232 | 1426 | 2.713718 | 0.032029 |
| green       | 1089 PROTEIN_TYROSINE_PHOSPHATASE_ACTIVITY           | 8  | 47  | 16206 | 1305 | 2.119899 | 0.03204  |
| green       | 4760 REACTOME_AMYLOIDS                               | 8  | 47  | 16206 | 1305 | 2.119899 | 0.03204  |
| pink        | 8853 GSE17721_CTRL_VS_POLYIC_2H_BMDM_DN              | 6  | 169 | 16084 | 228  | 2.530832 | 0.032076 |
| pink        | 8903 GSE17721_CTRL_VS_GARDIQUIMOD_4H_BMDM_DN         | 6  | 169 | 16084 | 228  | 2.530832 | 0.032076 |
| green       | 8159 ACEVEDO_FGFR1_TARGETS_IN_PROSTATE_CANCER_M      | 28 | 242 | 16011 | 1305 | 1.441006 | 0.03208  |
| salmon      | 2793 KEGG_DNA_REPLICATION                            | 2  | 36  | 16217 | 127  | 7.109799 | 0.032101 |
| salmon      | 3634 MODULE_149                                      | 2  | 36  | 16217 | 127  | 7.109799 | 0.032101 |
| salmon      | 6352 MA_MYELOID_DIFFERENTIATION_UP                   | 2  | 36  | 16217 | 127  | 7.109799 | 0.032101 |
| greenyello  | 6166 ROSS_AML_WITH_MLL_FUSIONS                       | 3  | 75  | 16178 | 150  | 4.334133 | 0.032109 |
| blue        | 1777 V\$MYCMAX_03                                    | 52 | 222 | 16031 | 2978 | 1.278378 | 0.03213  |
| red         | 2210 WTGAAAT_UNKNOWN                                 | 23 | 471 | 15782 | 524  | 1.514639 | 0.032133 |
| black       | 7687 ZHAN_MULTIPLE_MYELOMA_PR_DN                     | 3  | 40  | 16213 | 283  | 4.307332 | 0.032137 |
| red         | 326 REGULATION_OF_HORMONE_SECRETION                  | 2  | 9   | 16244 | 524  | 6.892706 | 0.032139 |
| red         | 1222 DELAYED_RECTIFIER_POTASSIUM_CHANNEL_ACTIVITY    | 2  | 9   | 16244 | 524  | 6.892706 | 0.032139 |
| red         | 1311 SIALYLTRANSFERASE_ACTIVITY                      | 2  | 9   | 16244 | 524  | 6.892706 | 0.032139 |
| red         | 4470 REACTOME_ACTIVATION_OF_CHAPERONE_GENES_BY       | 2  | 9   | 16244 | 524  | 6.892706 | 0.032139 |
| red         | 4860 ZERBINI_RESPONSE_TO_SULINDAC_UP                 | 2  | 9   | 16244 | 524  | 6.892706 | 0.032139 |
| red         | 5373 KONG_E2F1_TARGETS                               | 2  | 9   | 16244 | 524  | 6.892706 | 0.032139 |
| red         | 5870 SCHAEFFER_PROSTATE_DEVELOPMENT_AND_CANCER       | 2  | 9   | 16244 | 524  | 6.892706 | 0.032139 |
| yellow      | 8644 GSE14308_TH1_VS_NATURAL_TREG_UP                 | 24 | 184 | 16069 | 1426 | 1.486646 | 0.032143 |
| greenyello  | 9408 GSE24142_EARLY_THYMIC_PROGENITOR_VS_DN2_THY     | 5  | 191 | 16062 | 150  | 2.836475 | 0.032159 |
| greenyello  | 10045 GSE3982_MAC_VS_TH2_DN                          | 5  | 191 | 16062 | 150  | 2.836475 | 0.032159 |
| blue        | 1750 V\$NKX62_Q2                                     | 42 | 174 | 16079 | 2978 | 1.317373 | 0.032177 |
| salmon      | 4371 REACTOME_CELL_CYCLE_MITOTIC                     | 6  | 304 | 15949 | 127  | 2.52585  | 0.03218  |
| red         | 8381 LEF1_UP.V1_UP                                   | 10 | 158 | 16095 | 524  | 1.963112 | 0.032183 |
| red         | 9024 GSE17721_PAM3CSK4_VS_GADIQUIMOD_2H_BMDM         | 10 | 158 | 16095 | 524  | 1.963112 | 0.032183 |
| black       | 2228 YTCCRRNAGGY_UNKNOWN                             | 4  | 69  | 16184 | 283  | 3.329339 | 0.032196 |
| brown       | 5065 ODONNELL_TARGETS_OF_MYC_AND_TFRC_UP             | 17 | 79  | 16174 | 2190 | 1.597023 | 0.032225 |
| magenta     | 6746 WANG_SMARCE1_TARGETS_UP                         | 6  | 231 | 16022 | 167  | 2.527879 | 0.032229 |
| purple      | 1791 CYTAGCAAY_UNKNOWN                               | 4  | 124 | 16129 | 157  | 3.339429 | 0.032234 |
| lightgreen  | 6642 ZHU_CMV_ALL_DN                                  | 2  | 109 | 16144 | 42   | 7.100481 | 0.032237 |
| turquoise   | 2378 MORF_DEK                                        | 80 | 259 | 15994 | 4169 | 1.204181 | 0.032253 |
| lightcyan   | 7878 DUTERTRE ESTRADIOL_RESPONSE_24HR_DN             | 5  | 466 | 15787 | 62   | 2.812716 | 0.032262 |
| lightcyan   | 8776 GSE15930_NAIVE_VS_24H_IN_VITRO_STIM_CD8_TCELL   | 3  | 182 | 16071 | 62   | 4.321074 | 0.032265 |
| lightcyan   | 9533 GSE27786_LSK_VS_CD4_TCELL_DN                    | 3  | 182 | 16071 | 62   | 4.321074 | 0.032265 |
| lightcyan   | 9999 GSE3982_MAST_CELL_VS_BCELL_DN                   | 3  | 182 | 16071 | 62   | 4.321074 | 0.032265 |
| brown       | 2699 GNF2_SPI1                                       | 9  | 34  | 16219 | 2190 | 1.964504 | 0.032292 |
| brown       | 4010 PID_ERBB1_RECEPTOR_PROXIMAL_PATHWAY             | 9  | 34  | 16219 | 2190 | 1.964504 | 0.032292 |
| brown       | 6426 WEIGEL_OXIDATIVE_STRESS_RESPONSE                | 9  | 34  | 16219 | 2190 | 1.964504 | 0.032292 |
| brown       | 7112 HONMA_DOCETAXEL_RESISTANCE                      | 9  | 34  | 16219 | 2190 | 1.964504 | 0.032292 |
| lightcyan   | 7704 WONG_ADULT_TISSUE_STEM_MODULE                   | 6  | 629 | 15624 | 62   | 2.50059  | 0.032295 |

|             |       |                                               |    |      |       |      |          |          |
|-------------|-------|-----------------------------------------------|----|------|-------|------|----------|----------|
| yellow      | 8760  | GSE15659_RESTING_VS_ACTIVATED_TREG_UP         | 20 | 147  | 16106 | 1426 | 1.550696 | 0.032323 |
| lightgreen  | 2140  | TGCTTTG,MIR-330                               | 3  | 270  | 15983 | 42   | 4.299735 | 0.032339 |
| blue        | 9228  | GSE18791_CTRL_VS_NEWCASTLE_VIRUS_DC_10H_UP    | 47 | 198  | 16055 | 2978 | 1.295512 | 0.032391 |
| blue        | 9311  | GSE22886_UNSTIM_VS_STIM_MEMORY_TCELL_DN       | 47 | 198  | 16055 | 2978 | 1.295512 | 0.032391 |
| blue        | 10148 | GSE7400_CTRL_VS_CSF3_IN_VIVO_TREATED_PBMC_UI  | 47 | 198  | 16055 | 2978 | 1.295512 | 0.032391 |
| greenyello  | 9248  | GSE19825_NAIVE_VS_IL2RALOW_DAY3_EFF_CD8_TCEL  | 4  | 130  | 16123 | 150  | 3.333949 | 0.032406 |
| red         | 7930  | JOHNSTONE_PARVB_TARGETS_2_DN                  | 17 | 322  | 15931 | 524  | 1.637553 | 0.032408 |
| lightcyan   | 5433  | HUMMERICH_SKIN_CANCER_PROGRESSION_UP          | 2  | 74   | 16179 | 62   | 7.085004 | 0.03244  |
| lightcyan   | 5588  | YORDY_RECIPROCAL_REGULATION_BY_ETS1_AND_SP1   | 2  | 74   | 16179 | 62   | 7.085004 | 0.03244  |
| lightcyan   | 7264  | BOYLAN_MULTIPLE_MYELOMA_D_DN                  | 2  | 74   | 16179 | 62   | 7.085004 | 0.03244  |
| red         | 4365  | REACTOME_SIGNALING_BY_GPCR                    | 21 | 421  | 15832 | 524  | 1.547175 | 0.032445 |
| brown       | 8956  | GSE17721_PAM3CSK4_VS_CPG_6H_BMDM_UP           | 35 | 190  | 16063 | 2190 | 1.367111 | 0.03248  |
| brown       | 9035  | GSE17721_PAM3CSK4_VS_GADIQUIMOD_16H_BMDM      | 35 | 190  | 16063 | 2190 | 1.367111 | 0.03248  |
| brown       | 10239 | GSE9006_TYPE_1_VS_TYPE_2_DIABETES_PBMC_AT_DX  | 35 | 190  | 16063 | 2190 | 1.367111 | 0.03248  |
| purple      | 2285  | CCAWWNAAGG_V\$SRF_Q4                          | 3  | 72   | 16181 | 157  | 4.313429 | 0.032485 |
| purple      | 9501  | GSE2706_UNSTIM_VS_8H_R848_DC_DN               | 5  | 183  | 16070 | 157  | 2.828478 | 0.032502 |
| red         | 3029  | BIOCARTA_NFKB_PATHWAY                         | 3  | 22   | 16231 | 524  | 4.229615 | 0.032544 |
| red         | 3190  | chr10p13                                      | 3  | 22   | 16231 | 524  | 4.229615 | 0.032544 |
| red         | 3562  | MODULE_73                                     | 3  | 22   | 16231 | 524  | 4.229615 | 0.032544 |
| red         | 4221  | REACTOME_YAP1_AND_WWTR1_TAZ_STIMULATED_GI     | 3  | 22   | 16231 | 524  | 4.229615 | 0.032544 |
| red         | 6859  | GAVIN_PDE3B_TARGETS                           | 3  | 22   | 16231 | 524  | 4.229615 | 0.032544 |
| brown       | 4246  | REACTOME_SIGNALING_BY_FGFR_IN_DISEASE         | 22 | 109  | 16144 | 2190 | 1.49791  | 0.032544 |
| brown       | 7506  | BOYALT_LIVER_CANCER_SUBCLASS_G1_UP            | 22 | 109  | 16144 | 2190 | 1.49791  | 0.032544 |
| brown       | 7649  | HOSHIDA_LIVER_CANCER_SUBCLASS_S2              | 22 | 109  | 16144 | 2190 | 1.49791  | 0.032544 |
| pink        | 7236  | WANG_TUMOR_INVASIVENESS_UP                    | 10 | 363  | 15890 | 228  | 1.963777 | 0.032549 |
| blue        | 2469  | MORF_SS18                                     | 17 | 59   | 16194 | 2978 | 1.572555 | 0.032551 |
| red         | 880   | CATION_TRANSPORT                              | 8  | 115  | 16138 | 524  | 2.157717 | 0.032568 |
| cyan        | 9197  | GSE17974_IL4_AND_ANTI_IL12_VS_UNTREATED_12H_  | 3  | 147  | 16106 | 77   | 4.307713 | 0.03262  |
| cyan        | 9221  | GSE18791_CTRL_VS_NEWCASTLE_VIRUS_DC_2H_DN     | 3  | 147  | 16106 | 77   | 4.307713 | 0.03262  |
| purple      | 5393  | PEREZ_TP53_TARGETS                            | 16 | 1001 | 15252 | 157  | 1.654702 | 0.032674 |
| lightyellow | 9198  | GSE17974_IL4_AND_ANTI_IL12_VS_UNTREATED_24H_  | 2  | 140  | 16113 | 33   | 7.035931 | 0.03268  |
| turquoise   | 9214  | GSE17974_2.5H_VS_72H_IL4_AND_ANTI_IL12_ACT_CD | 63 | 199  | 16054 | 4169 | 1.23421  | 0.032699 |
| turquoise   | 9355  | GSE22886_NEUTROPHIL_VS_MONOCYTE_DN            | 63 | 199  | 16054 | 4169 | 1.23421  | 0.032699 |
| cyan        | 444   | NEGATIVE_REGULATION_OF_ANGIOGENESIS           | 1  | 7    | 16246 | 77   | 30.15399 | 0.032701 |
| cyan        | 512   | SPERM_MOTILITY                                | 1  | 7    | 16246 | 77   | 30.15399 | 0.032701 |
| cyan        | 6075  | SCHUHMACHER_MYC_TARGETS_DN                    | 1  | 7    | 16246 | 77   | 30.15399 | 0.032701 |
| salmon      | 4416  | REACTOME_MRNA_PROCESSING                      | 4  | 154  | 16099 | 127  | 3.324062 | 0.032707 |
| salmon      | 7032  | ACEVEDO_NORMAL_TISSUE_ADJACENT_TO_LIVER_TUM   | 4  | 154  | 16099 | 127  | 3.324062 | 0.032707 |
| lightcyan   | 8721  | GSE14769_UNSTIM_VS_80MIN_LPS_BMDM_DN          | 3  | 183  | 16070 | 62   | 4.297462 | 0.032715 |
| lightcyan   | 8801  | GSE15930_STIM_VS_STIM_AND_TRICHOSTATINA_24H_  | 3  | 183  | 16070 | 62   | 4.297462 | 0.032715 |
| lightcyan   | 9141  | GSE17721_0.5H_VS_4H_GARDIQUIMOD_BMDM_DN       | 3  | 183  | 16070 | 62   | 4.297462 | 0.032715 |
| lightcyan   | 9827  | GSE360_DC_VS_MAC_B_MALAYI_LOW_DOSE_DN         | 3  | 183  | 16070 | 62   | 4.297462 | 0.032715 |
| lightcyan   | 10033 | GSE3982_MAC_VS_BCELL_DN                       | 3  | 183  | 16070 | 62   | 4.297462 | 0.032715 |
| lightcyan   | 10243 | GSE9037_CTRL_VS_LPS_4H_STIM_BMDM_DN           | 3  | 183  | 16070 | 62   | 4.297462 | 0.032715 |
| purple      | 7079  | BONOME_OVARIAN_CANCER_SURVIVAL_SUBOPTIMAL     | 9  | 455  | 15798 | 157  | 2.047694 | 0.03272  |
| turquoise   | 1975  | ATGTAGC,MIR-221,MIR-222                       | 37 | 109  | 16144 | 4169 | 1.323357 | 0.032737 |
| turquoise   | 5980  | MORI_EMU_MYC_LYMPHOMA_BY_ONSET_TIME_UP        | 37 | 109  | 16144 | 4169 | 1.323357 | 0.032737 |
| green       | 1180  | GATED_CHANNEL_ACTIVITY                        | 12 | 83   | 16170 | 1305 | 1.800637 | 0.03276  |
| turquoise   | 3121  | chr5q23                                       | 16 | 40   | 16213 | 4169 | 1.559415 | 0.032766 |
| turquoise   | 4414  | REACTOME_RNA_POL_II_TRANSCRIPTION_PRE_INITIAT | 16 | 40   | 16213 | 4169 | 1.559415 | 0.032766 |
| turquoise   | 8728  | GSE14769_20MIN_VS_360MIN_LPS_BMDM_UP          | 61 | 192  | 16061 | 4169 | 1.238598 | 0.032775 |
| turquoise   | 8941  | GSE17721_POLYIC_VS_PAM3CSK4_8H_BMDM_DN        | 61 | 192  | 16061 | 4169 | 1.238598 | 0.032775 |
| turquoise   | 9537  | GSE27786_LSK_VS_NKCELL_DN                     | 61 | 192  | 16061 | 4169 | 1.238598 | 0.032775 |
| turquoise   | 9589  | GSE27786_CD8_TCELL_VS_NKCELL_DN               | 61 | 192  | 16061 | 4169 | 1.238598 | 0.032775 |
| turquoise   | 10102 | GSE39820_CTRL_VS_IL1B_IL6_IL23A_CD4_TCELL_UP  | 61 | 192  | 16061 | 4169 | 1.238598 | 0.032775 |
| lightcyan   | 5176  | ENK_UV_RESPONSE_KERATINOCYTE_DN               | 5  | 468  | 15785 | 62   | 2.800696 | 0.032775 |
| greenyello  | 1591  | V\$GR_Q6                                      | 5  | 192  | 16061 | 150  | 2.821701 | 0.032782 |
| greenyello  | 8687  | GSE1460_INTRATHYMIC_T_PROGENITOR_VS_CD4_THY   | 5  | 192  | 16061 | 150  | 2.821701 | 0.032782 |
| greenyello  | 8711  | GSE1460_NAIVE_CD4_TCELL_CORD_BLOOD_VS_THYMI   | 5  | 192  | 16061 | 150  | 2.821701 | 0.032782 |
| greenyello  | 8927  | GSE17721_LPS_VS_POLYIC_16H_BMDM_DN            | 5  | 192  | 16061 | 150  | 2.821701 | 0.032782 |

|            |                                                    |    |     |       |      |          |          |
|------------|----------------------------------------------------|----|-----|-------|------|----------|----------|
| greenyello | 9729 GSE30962_ACUTE_VS_CHRONIC_LCMV_SECONDARY_II   | 5  | 192 | 16061 | 150  | 2.821701 | 0.032782 |
| yellow     | 9751 GSE32423_CTRL_VS_IL4_MEMORY_CD8_TCELL_DN      | 23 | 175 | 16078 | 1426 | 1.497972 | 0.032789 |
| midnightb  | 618 PROTEIN_RNA_COMPLEX_ASSEMBLY                   | 2  | 65  | 16188 | 71   | 7.043554 | 0.032793 |
| midnightb  | 3666 MODULE_183                                    | 2  | 65  | 16188 | 71   | 7.043554 | 0.032793 |
| grey60     | 8348 STK33_SKM_UP                                  | 3  | 259 | 15994 | 44   | 4.278607 | 0.032796 |
| turquoise  | 3593 MODULE_105                                    | 59 | 185 | 16068 | 4169 | 1.243317 | 0.032809 |
| pink       | 4820 WATANABE_RECTAL_CANCER_RADIOOTHERAPY_RESPON   | 4  | 86  | 16167 | 228  | 3.315585 | 0.03281  |
| red        | 3606 MODULE_118                                    | 18 | 347 | 15906 | 524  | 1.60896  | 0.032837 |
| yellow     | 1835 GCGNNANTTCC_UNKNOWN                           | 17 | 120 | 16133 | 1426 | 1.614662 | 0.032838 |
| magenta    | 4832 SCHUETZ_BREAST_CANCER_DUCTAL_INVASIVE_DN      | 3  | 68  | 16185 | 167  | 4.293677 | 0.032839 |
| brown      | 1463 V\$ELK1_01                                    | 44 | 248 | 16005 | 2190 | 1.316711 | 0.03284  |
| cyan       | 5942 AMIT_SERUM_RESPONSE_120_MCF10A                | 2  | 60  | 16193 | 77   | 7.035931 | 0.032854 |
| black      | 9563 GSE27786_BCELL_VS_CD4_TCELL_DN                | 7  | 174 | 16079 | 283  | 2.310446 | 0.032871 |
| cyan       | 6388 KUMAR_TARGETS_OF_MLL_AF9_FUSION               | 5  | 376 | 15877 | 77   | 2.806887 | 0.032883 |
| red        | 2191 SYATTGTG_UNKNOWN                              | 11 | 181 | 16072 | 524  | 1.885022 | 0.032884 |
| red        | 5892 GOTZMANN_EPITHELIAL_TO_MESENCHYMAL_TRANSIT    | 11 | 181 | 16072 | 524  | 1.885022 | 0.032884 |
| red        | 8778 GSE15930_NAIVE_VS_24H_IN_VITRO_STIM_IL12_CD8_ | 11 | 181 | 16072 | 524  | 1.885022 | 0.032884 |
| red        | 9158 GSE17974_0H_VS_6H_IN_VITRO_ACT_CD4_TCELL_UP   | 11 | 181 | 16072 | 524  | 1.885022 | 0.032884 |
| red        | 9507 GSE2706_UNSTIM_VS_2H_LPS_AND_R848_DC_DN       | 11 | 181 | 16072 | 524  | 1.885022 | 0.032884 |
| red        | 9710 GSE30083_SP1_VS_SP2_THYMOCYTE_UP              | 11 | 181 | 16072 | 524  | 1.885022 | 0.032884 |
| midnightb  | 1929 V\$GR_01                                      | 3  | 160 | 16093 | 71   | 4.292165 | 0.032888 |
| blue       | 167 NUCLEOPLASM_PART                               | 48 | 203 | 16050 | 2978 | 1.290488 | 0.032891 |
| blue       | 7409 ZHANG_TLX_TARGETS_60HR_DN                     | 62 | 271 | 15982 | 2978 | 1.248623 | 0.032906 |
| magenta    | 5488 FARMER_BREAST_CANCER_BASAL_VS_LULMINAL        | 7  | 295 | 15958 | 167  | 2.309368 | 0.032918 |
| magenta    | 7240 GRESHOCK_CANCER_COPY_NUMBER_UP                | 7  | 295 | 15958 | 167  | 2.309368 | 0.032918 |
| tan        | 972 DNA_PACKAGING                                  | 2  | 32  | 16221 | 145  | 7.005603 | 0.032923 |
| tan        | 4710 REACTOME_INTERACTIONS_OF_VPR_WITH_HOST_CELI   | 2  | 32  | 16221 | 145  | 7.005603 | 0.032923 |
| tan        | 5824 CAFFAREL_RESPONSE_TO_THC_UP                   | 2  | 32  | 16221 | 145  | 7.005603 | 0.032923 |
| lightgreen | 3605 MODULE_117                                    | 4  | 472 | 15781 | 42   | 3.279459 | 0.032966 |
| green      | 1411 TRANSFERASE_ACTIVITY_TRANSFERRING_SULFUR_CON  | 5  | 23  | 16230 | 1305 | 2.70748  | 0.032968 |
| tan        | 9244 GSE18791_UNSTIM_VS_NEWCATSLE_VIRUS_DC_10H_U   | 5  | 199 | 16054 | 145  | 2.816323 | 0.033005 |
| tan        | 9572 GSE27786_BCELL_VS_NEUTROPHIL_UP               | 5  | 199 | 16054 | 145  | 2.816323 | 0.033005 |
| pink       | 6955 MARTINEZ_TP53_TARGETS_UP                      | 13 | 522 | 15731 | 228  | 1.775299 | 0.033015 |
| greenyello | 6103 FRASOR_RESPONSE_TO ESTRADIOL_UP               | 2  | 31  | 16222 | 150  | 6.990538 | 0.033035 |
| red        | 2281 TGACCTTG_V\$SF1_Q6                            | 12 | 204 | 16049 | 524  | 1.82454  | 0.03307  |
| pink       | 3511 MODULE_19                                     | 8  | 264 | 15989 | 228  | 2.160154 | 0.033084 |
| lightgreen | 130 MYOSIN_COMPLEX                                 | 1  | 13  | 16240 | 42   | 29.7674  | 0.03309  |
| lightgreen | 623 VACUOLAR_TRANSPORT                             | 1  | 13  | 16240 | 42   | 29.7674  | 0.03309  |
| lightgreen | 1034 POSITIVE_REGULATION_OF_CYTOKINE_PRODUCTION    | 1  | 13  | 16240 | 42   | 29.7674  | 0.03309  |
| lightgreen | 1143 ANION_CATION_SYMPORTER_ACTIVITY               | 1  | 13  | 16240 | 42   | 29.7674  | 0.03309  |
| lightgreen | 4632 REACTOME_REGULATION_OF_IFNG_SIGNALING         | 1  | 13  | 16240 | 42   | 29.7674  | 0.03309  |
| lightgreen | 4648 REACTOME_ACTIVATION_OF_IRF3_IRF7_MEDIATED_BY  | 1  | 13  | 16240 | 42   | 29.7674  | 0.03309  |
| lightgreen | 4663 REACTOME_TRAF6_MEDIATED_INDUCION_OF_TAK1_     | 1  | 13  | 16240 | 42   | 29.7674  | 0.03309  |
| lightgreen | 5670 INAMURA_LUNG_CANCER_SCC_UP                    | 1  | 13  | 16240 | 42   | 29.7674  | 0.03309  |
| greenyello | 8091 DELACROIX_RAR_BOUND_ES                        | 8  | 402 | 15851 | 150  | 2.156285 | 0.033098 |
| green      | 8264 PRC1_BMI_UP.V1_UP                             | 17 | 131 | 16122 | 1305 | 1.616221 | 0.033117 |
| purple     | 7923 BHAT_ESR1_TARGETS_NOT_VIA_AKT1_UP             | 5  | 184 | 16069 | 157  | 2.813106 | 0.033159 |
| purple     | 9957 GSE3982_CTRL_VS_LPS_48H_DC_DN                 | 5  | 184 | 16069 | 157  | 2.813106 | 0.033159 |
| purple     | 9993 GSE3982_MAST_CELL_VS_DC_DN                    | 5  | 184 | 16069 | 157  | 2.813106 | 0.033159 |
| lightcyan  | 8808 GSE15930_STIM_VS_STIM_AND_IL-12_72H_CD8_T_CE  | 3  | 184 | 16069 | 62   | 4.274106 | 0.033169 |
| lightcyan  | 8907 GSE17721_CTRL_VS_GARDIQUIMOD_8H_BMDM_DN       | 3  | 184 | 16069 | 62   | 4.274106 | 0.033169 |
| lightcyan  | 9616 GSE27786_NEUTROPHIL_VS_MONO_MAC_UP            | 3  | 184 | 16069 | 62   | 4.274106 | 0.033169 |
| lightcyan  | 9761 GSE3337_CTRL_VS_4H_IFNG_IN_CD8POS_DC_DN       | 3  | 184 | 16069 | 62   | 4.274106 | 0.033169 |
| magenta    | 8262 RAF_UP.V1_UP                                  | 5  | 173 | 16080 | 167  | 2.812814 | 0.033177 |
| magenta    | 8708 GSE1460_CORD_VS_ADULT_BLOOD_NAIVE_CD4_TCELL   | 5  | 173 | 16080 | 167  | 2.812814 | 0.033177 |
| cyan       | 172 EXTRACELLULAR_SPACE                            | 3  | 148 | 16105 | 77   | 4.278607 | 0.033185 |
| cyan       | 8220 AKT_UP.V1_UP                                  | 3  | 148 | 16105 | 77   | 4.278607 | 0.033185 |
| yellow     | 3522 MODULE_32                                     | 29 | 232 | 16021 | 1426 | 1.424702 | 0.033195 |
| greenyello | 8270 PRC2_SUZ12_UP.V1_UP                           | 4  | 131 | 16122 | 150  | 3.308499 | 0.033195 |
| red        | 525 BLOOD_COAGULATION                              | 4  | 38  | 16215 | 524  | 3.264966 | 0.033196 |

|            |      |                                               |    |     |       |      |          |          |
|------------|------|-----------------------------------------------|----|-----|-------|------|----------|----------|
| red        | 835  | COAGULATION                                   | 4  | 38  | 16215 | 524  | 3.264966 | 0.033196 |
| red        | 4231 | REACTOME_TRIGLYCERIDE_BIOSYNTHESIS            | 4  | 38  | 16215 | 524  | 3.264966 | 0.033196 |
| red        | 7463 | CROONQUIST_NRAS_SIGNALING_UP                  | 4  | 38  | 16215 | 524  | 3.264966 | 0.033196 |
| red        | 7589 | ONO_AML1_TARGETS_DN                           | 4  | 38  | 16215 | 524  | 3.264966 | 0.033196 |
| red        | 7683 | ZHAN_MULTIPLE_MYELOMA_LB_DN                   | 4  | 38  | 16215 | 524  | 3.264966 | 0.033196 |
| greenyello | 993  | CELL_MIGRATION                                | 3  | 76  | 16177 | 150  | 4.277105 | 0.033209 |
| greenyello | 7360 | ROSS_LEUKEMIA_WITH_MLL_FUSIONS                | 3  | 76  | 16177 | 150  | 4.277105 | 0.033209 |
| yellow     | 1795 | V\$LBP1_Q6                                    | 25 | 194 | 16059 | 1426 | 1.468765 | 0.033224 |
| brown      | 8885 | GSE17721_CTRL_VS_CPG_2H_BMDM_DN               | 31 | 165 | 16088 | 2190 | 1.394335 | 0.033231 |
| green      | 7188 | LIN_NPAS4_TARGETS_DN                          | 9  | 56  | 16197 | 1305 | 2.001601 | 0.033236 |
| lightcyan  | 5168 | KOKKINAKIS_METHIONINE_DEPRIVATION_96HR_DN     | 2  | 75  | 16178 | 62   | 6.990538 | 0.033248 |
| lightcyan  | 6156 | LIN_APC_TARGETS                               | 2  | 75  | 16178 | 62   | 6.990538 | 0.033248 |
| lightcyan  | 6166 | ROSS_AML_WITH_MLL_FUSIONS                     | 2  | 75  | 16178 | 62   | 6.990538 | 0.033248 |
| lightcyan  | 6214 | PEART_HDAC_PROLIFERATION_CLUSTER_DN           | 2  | 75  | 16178 | 62   | 6.990538 | 0.033248 |
| lightgreen | 4956 | BASAKI_YBX1_TARGETS_UP                        | 3  | 273 | 15980 | 42   | 4.252486 | 0.033256 |
| cyan       | 8344 | STK33_DN                                      | 4  | 256 | 15997 | 77   | 3.298093 | 0.03327  |
| brown      | 8093 | KRIEG_KDM3A_TARGETS_NOT_HYPOXIA               | 34 | 184 | 16069 | 2190 | 1.371357 | 0.033294 |
| brown      | 9992 | GSE3982_MAST_CELL_VS_DC_UP                    | 34 | 184 | 16069 | 2190 | 1.371357 | 0.033294 |
| magenta    | 4453 | REACTOME_NCAM1_INTERACTIONS                   | 2  | 28  | 16225 | 167  | 6.951668 | 0.03331  |
| magenta    | 4958 | NOJIMA_SFRP2_TARGETS_UP                       | 2  | 28  | 16225 | 167  | 6.951668 | 0.03331  |
| magenta    | 7701 | TIAN_TNF_SIGNALING_VIA_NFKB                   | 2  | 28  | 16225 | 167  | 6.951668 | 0.03331  |
| greenyello | 7839 | MARTENS_TRETINOIN_RESPONSE_UP                 | 9  | 478 | 15775 | 150  | 2.040126 | 0.033315 |
| blue       | 3072 | BIOCARTA_MEF2D_PATHWAY                        | 7  | 18  | 16235 | 2978 | 2.122435 | 0.033346 |
| blue       | 4423 | REACTOME_FORMATION_OF_TUBULIN_FOLDING_INTE    | 7  | 18  | 16235 | 2978 | 2.122435 | 0.033346 |
| blue       | 4522 | REACTOME_DEADENYLATION_OF_MRNA                | 7  | 18  | 16235 | 2978 | 2.122435 | 0.033346 |
| blue       | 7607 | KUROZUMI_RESPONSE_TO_ONCOCYTIC_VIRUS_AND_C    | 7  | 18  | 16235 | 2978 | 2.122435 | 0.033346 |
| brown      | 2825 | KEGG_NOTCH_SIGNALING_PATHWAY                  | 11 | 45  | 16208 | 2190 | 1.814135 | 0.033364 |
| brown      | 4025 | PID_AR_TF_PATHWAY                             | 11 | 45  | 16208 | 2190 | 1.814135 | 0.033364 |
| brown      | 4071 | PID_HEDGEHOG_GLIPATHWAY                       | 11 | 45  | 16208 | 2190 | 1.814135 | 0.033364 |
| brown      | 6549 | CHIBA_RESPONSE_TO_TSA                         | 11 | 45  | 16208 | 2190 | 1.814135 | 0.033364 |
| turquoise  | 6772 | KYNG_RESPONSE_TO_H2O2                         | 25 | 69  | 16184 | 4169 | 1.412513 | 0.033369 |
| green      | 7445 | TAVAZOIE_METASTASIS                           | 11 | 74  | 16179 | 1305 | 1.851331 | 0.033371 |
| salmon     | 6200 | PENG_GLUCOSE_DEPRIVATION_DN                   | 4  | 155 | 16098 | 127  | 3.302616 | 0.033377 |
| red        | 4903 | PUIFFE_INVASION_INHIBITED_BY_ASCITES_DN       | 9  | 137 | 16116 | 524  | 2.037625 | 0.033381 |
| yellow     | 9438 | GSE24634_NAIVE_CD4_TCELL_VS_DAY10_IL4_CONV_T  | 22 | 166 | 16087 | 1426 | 1.510527 | 0.033391 |
| midnightb  | 5096 | NAGASHIMA_NRG1_SIGNALING_UP                   | 3  | 161 | 16092 | 71   | 4.265506 | 0.03341  |
| midnightb  | 9643 | GSE29615_DAY3_VS_DAY7_LAIV_FLU_VACCINE_PBM    | 3  | 161 | 16092 | 71   | 4.265506 | 0.03341  |
| brown      | 7216 | WINTER_HYPOXIA_METAGENE                       | 39 | 216 | 16037 | 2190 | 1.339986 | 0.03341  |
| greenyello | 1788 | V\$GATA4_Q3                                   | 5  | 193 | 16060 | 150  | 2.807081 | 0.033413 |
| blue       | 8491 | GSE11924_TH2_VS_TH17_CD4_TCELL_DN             | 44 | 184 | 16069 | 2978 | 1.3051   | 0.033434 |
| blue       | 9174 | GSE17974_CTRL_VS_ACT_IL4_AND_ANTI_IL12_4H_CD4 | 44 | 184 | 16069 | 2978 | 1.3051   | 0.033434 |
| blue       | 9204 | GSE17974_0.5H_VS_72H_UNTREATED_IN_VITRO_CD4_  | 44 | 184 | 16069 | 2978 | 1.3051   | 0.033434 |
| magenta    | 1225 | SUBSTRATE_SPECIFIC_TRANSPORTER_ACTIVITY       | 7  | 296 | 15957 | 167  | 2.301566 | 0.033436 |
| magenta    | 3582 | MODULE_94                                     | 7  | 296 | 15957 | 167  | 2.301566 | 0.033436 |
| turquoise  | 7858 | HIRSCH_CELLULAR_TRANSFORMATION_SIGNATURE_UF   | 72 | 231 | 16022 | 4169 | 1.215128 | 0.033448 |
| cyan       | 1433 | DNA_BINDING                                   | 6  | 509 | 15744 | 77   | 2.488148 | 0.033513 |
| turquoise  | 2790 | KEGG_RNA_DEGRADATION                          | 21 | 56  | 16197 | 4169 | 1.461951 | 0.033532 |
| green      | 8935 | GSE17721_POLYIC_VS_PAM3CSK4_2H_BMDM_DN        | 20 | 161 | 16092 | 1305 | 1.547131 | 0.033553 |
| turquoise  | 29   | RIBONUCLEOPROTEIN_COMPLEX                     | 46 | 140 | 16113 | 4169 | 1.280948 | 0.033559 |
| lightgreen | 7963 | PASINI_SUZ12_TARGETS_DN                       | 3  | 274 | 15979 | 42   | 4.236966 | 0.033565 |
| greenyello | 2199 | TGGNNNNNNKCCAR_UNKNOWN                        | 7  | 330 | 15923 | 150  | 2.298404 | 0.033567 |
| purple     | 5793 | BUYTAERT_PHOTODYNAMIC_THERAPY_STRESS_DN       | 11 | 607 | 15646 | 157  | 1.876022 | 0.033595 |
| turquoise  | 4814 | KORKOLA_YOLK_SAC_TUMOR_UP                     | 9  | 19  | 16234 | 4169 | 1.846675 | 0.033601 |
| turquoise  | 5418 | SEIDEN_MET_SIGNALING                          | 9  | 19  | 16234 | 4169 | 1.846675 | 0.033601 |
| turquoise  | 6916 | KYNG_ENVIRONMENTAL_STRESS_RESPONSE_DN         | 9  | 19  | 16234 | 4169 | 1.846675 | 0.033601 |
| turquoise  | 7547 | WANG_RECURRENT_LIVER_CANCER_UP                | 9  | 19  | 16234 | 4169 | 1.846675 | 0.033601 |
| lightcyan  | 9086 | GSE17721_LPS_VS_GARDIQUIMOD_12H_BMDM_UP       | 3  | 185 | 16068 | 62   | 4.251003 | 0.033627 |
| lightcyan  | 9765 | GSE3337_4H_VS_16H_IFNG_IN_CD8POS_DC_DN        | 3  | 185 | 16068 | 62   | 4.251003 | 0.033627 |
| lightcyan  | 9881 | GSE360_T_GONDII_VS_B_MALAYI_LOW_DOSE_MAC_D    | 3  | 185 | 16068 | 62   | 4.251003 | 0.033627 |
| blue       | 4006 | PID_MTOR_4PATHWAY                             | 19 | 68  | 16185 | 2978 | 1.524943 | 0.033636 |



|            |                                                   |    |      |       |      |          |          |
|------------|---------------------------------------------------|----|------|-------|------|----------|----------|
| salmon     | 7937 BRUINS_UVC_RESPONSE_LATE                     | 14 | 1045 | 15208 | 127  | 1.714516 | 0.033637 |
| purple     | 6160 FRASOR_RESPONSE_TO ESTRADIOL_DN              | 3  | 73   | 16180 | 157  | 4.254341 | 0.033644 |
| yellow     | 64 ORGANELLE_LUMEN                                | 50 | 439  | 15814 | 1426 | 1.298134 | 0.033669 |
| yellow     | 146 MEMBRANE_ENCLOSED_LUMEN                       | 50 | 439  | 15814 | 1426 | 1.298134 | 0.033669 |
| yellow     | 1538 ACTAYRNNCCCR_UNKNOWN                         | 50 | 439  | 15814 | 1426 | 1.298134 | 0.033669 |
| green      | 2693 GNF2_RTN1                                    | 7  | 39   | 16214 | 1305 | 2.235406 | 0.033672 |
| green      | 5861 SCHAEFFER_PROSTATE_DEVELOPMENT_12HR_DN       | 7  | 39   | 16214 | 1305 | 2.235406 | 0.033672 |
| turquoise  | 628 REGULATION_OF_ORGANELLE_ORGANIZATION_AND_B    | 15 | 37   | 16216 | 4169 | 1.580488 | 0.033677 |
| turquoise  | 3054 BIOCARTA_CHREBP2_PATHWAY                     | 15 | 37   | 16216 | 4169 | 1.580488 | 0.033677 |
| turquoise  | 4391 REACTOME_PLC_BETA_MEDIATED_EVENTS            | 15 | 37   | 16216 | 4169 | 1.580488 | 0.033677 |
| turquoise  | 4601 REACTOME_IL1_SIGNALING                       | 15 | 37   | 16216 | 4169 | 1.580488 | 0.033677 |
| yellow     | 3394 chr1q22                                      | 11 | 68   | 16185 | 1426 | 1.843732 | 0.033679 |
| yellow     | 7737 YAO_TEMPORAL_RESPONSE_TO_PROGESTERONE_CLU:   | 11 | 68   | 16185 | 1426 | 1.843732 | 0.033679 |
| green      | 3511 MODULE_19                                    | 30 | 264  | 15989 | 1305 | 1.415273 | 0.033693 |
| brown      | 2146 ACCAATC,MIR-509                              | 8  | 29   | 16224 | 2190 | 2.0473   | 0.03371  |
| brown      | 2912 BIOCARTA_AGR_PATHWAY                         | 8  | 29   | 16224 | 2190 | 2.0473   | 0.03371  |
| brown      | 4117 PID_HNF3APATHWAY                             | 8  | 29   | 16224 | 2190 | 2.0473   | 0.03371  |
| brown      | 4219 REACTOME_ANTIGEN_ACTIVATES_B_CELL_RECEPTOR_  | 8  | 29   | 16224 | 2190 | 2.0473   | 0.03371  |
| black      | 9831 GSE360_L_DONOVANI_VS_L_MAJOR_DC_DN           | 7  | 175  | 16078 | 283  | 2.297244 | 0.033753 |
| cyan       | 1455 AAANWWTGC_UNKNOWN                            | 3  | 149  | 16104 | 77   | 4.249891 | 0.033754 |
| pink       | 5175 ENK_UV_RESPONSE_KERATINOCYTE_UP              | 12 | 470  | 15783 | 228  | 1.820045 | 0.033756 |
| salmon     | 3579 MODULE_91                                    | 2  | 37   | 16216 | 127  | 6.917642 | 0.033765 |
| salmon     | 5453 LI_LUNG_CANCER                               | 2  | 37   | 16216 | 127  | 6.917642 | 0.033765 |
| salmon     | 6153 ZUCCHI_METASTASIS_UP                         | 2  | 37   | 16216 | 127  | 6.917642 | 0.033765 |
| salmon     | 6470 SESTO_RESPONSE_TO_UV_C6                      | 2  | 37   | 16216 | 127  | 6.917642 | 0.033765 |
| salmon     | 7366 VANTVEER_BREAST_CANCER_BRCA1_DN              | 2  | 37   | 16216 | 127  | 6.917642 | 0.033765 |
| salmon     | 8017 TERAQ_AOX4_TARGETS_SKIN_UP                   | 2  | 37   | 16216 | 127  | 6.917642 | 0.033765 |
| red        | 1715 V\$AR_Q2                                     | 7  | 95   | 16158 | 524  | 2.285476 | 0.033774 |
| red        | 2025 GCTTGAA,MIR-498                              | 7  | 95   | 16158 | 524  | 2.285476 | 0.033774 |
| red        | 6344 MENSE_HYPOXIA_UP                             | 7  | 95   | 16158 | 524  | 2.285476 | 0.033774 |
| red        | 6856 GAVIN_FOXP3_TARGETS_CLUSTER_P4               | 7  | 95   | 16158 | 524  | 2.285476 | 0.033774 |
| purple     | 7353 SCHRAETS_MLL_TARGETS_UP                      | 2  | 30   | 16223 | 157  | 6.901486 | 0.033799 |
| lightcyan  | 361 DETECTION_OF_STIMULUS_INVOLVED_IN_SENSORY_PI  | 1  | 9    | 16244 | 62   | 29.12724 | 0.033821 |
| lightcyan  | 4647 REACTOME_TRAF6_MEDIATED_IRF7_ACTIVATION_IN_1 | 1  | 9    | 16244 | 62   | 29.12724 | 0.033821 |
| lightcyan  | 5550 XU_HGF_TARGETS_REPRESSED_BY_AKT1_UP          | 1  | 9    | 16244 | 62   | 29.12724 | 0.033821 |
| lightcyan  | 5613 SASAKI_TARGETS_OF_TP73_AND_TP63              | 1  | 9    | 16244 | 62   | 29.12724 | 0.033821 |
| lightcyan  | 5634 OXFORD_RALB_TARGETS_DN                       | 1  | 9    | 16244 | 62   | 29.12724 | 0.033821 |
| lightcyan  | 6124 IIZUKA_LIVER_CANCER_PROGRESSION_G1_G2_UP     | 1  | 9    | 16244 | 62   | 29.12724 | 0.033821 |
| lightcyan  | 6369 IGLESIAS_E2F_TARGETS_DN                      | 1  | 9    | 16244 | 62   | 29.12724 | 0.033821 |
| lightcyan  | 7746 YIH_RESPONSE_TO_ARSENITE_C5                  | 1  | 9    | 16244 | 62   | 29.12724 | 0.033821 |
| purple     | 8891 GSE17721_CTRL_VS_CPG_8H_BMDM_DN              | 5  | 185  | 16068 | 157  | 2.7979   | 0.033825 |
| purple     | 9107 GSE17721_0.5H_VS_8H_POLYIC_BMDM_DN           | 5  | 185  | 16068 | 157  | 2.7979   | 0.033825 |
| purple     | 10028 GSE3982_DC_VS_TH2_UP                        | 5  | 185  | 16068 | 157  | 2.7979   | 0.033825 |
| red        | 4902 PUIFFE_INVASION_INHIBITED_BY_ASCITES_UP      | 6  | 75   | 16178 | 524  | 2.481374 | 0.033837 |
| red        | 5168 KOKKINAKIS_METHIONINE_DEPRIVATION_96HR_DN    | 6  | 75   | 16178 | 524  | 2.481374 | 0.033837 |
| red        | 62 CYTOPLASM                                      | 77 | 1950 | 14303 | 524  | 1.224781 | 0.033848 |
| brown      | 1275 PHOSPHOINOSITIDE_BINDING                     | 6  | 19   | 16234 | 2190 | 2.343619 | 0.033856 |
| brown      | 5282 WANG_BARRETTES_ESOPHAGUS_DN                  | 6  | 19   | 16234 | 2190 | 2.343619 | 0.033856 |
| cyan       | 3595 MODULE_107                                   | 2  | 61   | 16192 | 77   | 6.920588 | 0.033865 |
| cyan       | 5006 GARGALOVIC_RESPONSE_TO_OXIDIZED_PHOSPHOLIPID | 2  | 61   | 16192 | 77   | 6.920588 | 0.033865 |
| cyan       | 5879 RICKMAN_HEAD_AND_NECK_CANCER_A               | 2  | 61   | 16192 | 77   | 6.920588 | 0.033865 |
| cyan       | 6098 JECHLINGER_EPITHELIAL_TO_MESENCHYMAL_TRANSIT | 2  | 61   | 16192 | 77   | 6.920588 | 0.033865 |
| cyan       | 6775 WESTON_VEGFA_TARGETS_3HR                     | 2  | 61   | 16192 | 77   | 6.920588 | 0.033865 |
| lightgreen | 6157 VANTVEER_BREAST_CANCER_METASTASIS_DN         | 2  | 112  | 16141 | 42   | 6.910289 | 0.03388  |
| turquoise  | 6231 BHATTACHARYA_EMBRYONIC_STEM_CELL             | 28 | 79   | 16174 | 4169 | 1.38176  | 0.033893 |
| purple     | 6304 LENAOUR_DENDRITIC_CELL_MATURATION_DN         | 4  | 126  | 16127 | 157  | 3.286422 | 0.033894 |
| brown      | 8688 GSE1460_INTRATHYMIC_T_PROGENITOR_VS_NAIVE_CI | 36 | 197  | 16056 | 2190 | 1.356206 | 0.033898 |
| brown      | 9615 GSE27786_ERYTHROBLAST_VS_MONO_MAC_DN         | 36 | 197  | 16056 | 2190 | 1.356206 | 0.033898 |
| brown      | 4026 PID_P75NTRPATHWAY                            | 14 | 62   | 16191 | 2190 | 1.675814 | 0.0339   |
| brown      | 7550 WOO_LIVER_CANCER_RECURRENCE_DN               | 14 | 62   | 16191 | 2190 | 1.675814 | 0.0339   |

|             |       |                                               |    |     |       |      |          |          |
|-------------|-------|-----------------------------------------------|----|-----|-------|------|----------|----------|
| red         | 2039  | ATAACCT,MIR-154                               | 5  | 56  | 16197 | 524  | 2.769391 | 0.033932 |
| red         | 6842  | LEIN_NEURON_MARKERS                           | 5  | 56  | 16197 | 524  | 2.769391 | 0.033932 |
| lightyellow | 10219 | GSE8515_IL1_VS_IL6_4H_STIM_)MAC_DN            | 2  | 143 | 16110 | 33   | 6.888324 | 0.033973 |
| lightyellow | 751   | DIGESTION                                     | 1  | 17  | 16236 | 33   | 28.97148 | 0.033978 |
| lightyellow | 995   | STEROID_BIOSYNTHETIC_PROCESS                  | 1  | 17  | 16236 | 33   | 28.97148 | 0.033978 |
| lightyellow | 4725  | REACTOME_G1_S_SPECIFIC_TRANSCRIPTION          | 1  | 17  | 16236 | 33   | 28.97148 | 0.033978 |
| lightyellow | 5535  | LI_CISPLATIN_RESISTANCE_UP                    | 1  | 17  | 16236 | 33   | 28.97148 | 0.033978 |
| lightyellow | 6029  | DING_LUNG_CANCER_MUTATED_SIGNIFICANTLY        | 1  | 17  | 16236 | 33   | 28.97148 | 0.033978 |
| lightyellow | 8004  | TORCHIA_TARGETS_OF_EWSR1_FLI1_FUSION_TOP20_I  | 1  | 17  | 16236 | 33   | 28.97148 | 0.033978 |
| yellow      | 9106  | GSE17721_0.5H_VS_8H_POLYIC_BMDM_UP            | 24 | 185 | 16068 | 1426 | 1.47861  | 0.033981 |
| greenyello  | 4970  | VECCHI_GASTRIC_CANCER_ADVANCED_VS_EARLY_UP    | 4  | 132 | 16121 | 150  | 3.283434 | 0.033996 |
| greenyello  | 8247  | E2F3_UP.V1_DN                                 | 4  | 132 | 16121 | 150  | 3.283434 | 0.033996 |
| blue        | 8768  | GSE15750_WT_VS_TRAF6KO_DAY10_EFF_CD8_TCELL_I  | 45 | 189 | 16064 | 2978 | 1.29945  | 0.034016 |
| blue        | 8825  | GSE17580_TREG_VS_TEFF_DN                      | 45 | 189 | 16064 | 2978 | 1.29945  | 0.034016 |
| blue        | 9028  | GSE17721_PAM3CSK4_VS_GADIQUIMOD_6H_BMDM_      | 45 | 189 | 16064 | 2978 | 1.29945  | 0.034016 |
| blue        | 10079 | GSE3982_BASOPHIL_VS_TH1_DN                    | 45 | 189 | 16064 | 2978 | 1.29945  | 0.034016 |
| pink        | 8376  | KRAS.LUNG.BREAST_UP.V1_DN                     | 4  | 87  | 16166 | 228  | 3.277475 | 0.034026 |
| red         | 9509  | GSE2706_UNSTIM_VS_8H_LPS_AND_R848_DC_DN       | 11 | 182 | 16071 | 524  | 1.874664 | 0.034029 |
| red         | 853   | CHEMICAL_HOMEOSTASIS                          | 8  | 116 | 16137 | 524  | 2.139116 | 0.034037 |
| red         | 2175  | RTTTNNNYTGGM_UNKNOWN                          | 8  | 116 | 16137 | 524  | 2.139116 | 0.034037 |
| red         | 7093  | IZADPANAH_STEM_CELL_ADIPOSE_VS_BONE_UP        | 8  | 116 | 16137 | 524  | 2.139116 | 0.034037 |
| red         | 8312  | NRL_DN.V1_UP                                  | 8  | 116 | 16137 | 524  | 2.139116 | 0.034037 |
| salmon      | 5809  | WEI_MYCN_TARGETS_WITH_E_BOX                   | 11 | 754 | 15499 | 127  | 1.867029 | 0.034043 |
| greenyello  | 9413  | GSE24142_DN2_VS_DN3_THYMOCYTE_DN              | 5  | 194 | 16059 | 150  | 2.792612 | 0.034052 |
| blue        | 1483  | AACYNNTTCCS_UNKNOWN                           | 23 | 86  | 16167 | 2978 | 1.459615 | 0.034074 |
| magenta     | 3512  | MODULE_20                                     | 3  | 69  | 16184 | 167  | 4.23145  | 0.03408  |
| magenta     | 6982  | CAMPS_COLON_CANCER_COPY_NUMBER_UP             | 3  | 69  | 16184 | 167  | 4.23145  | 0.03408  |
| blue        | 6845  | LEIN_CHOROID_PLEXUS_MARKERS                   | 21 | 77  | 16176 | 2978 | 1.488461 | 0.034085 |
| lightcyan   | 8651  | GSE14308_TH17_VS_NATURAL_TREG_DN              | 3  | 186 | 16067 | 62   | 4.228148 | 0.034087 |
| lightcyan   | 9133  | GSE17721_0.5H_VS_24H_CPG_BMDM_DN              | 3  | 186 | 16067 | 62   | 4.228148 | 0.034087 |
| lightcyan   | 9143  | GSE17721_0.5H_VS_8H_GARDIQUIMOD_BMDM_DN       | 3  | 186 | 16067 | 62   | 4.228148 | 0.034087 |
| lightcyan   | 9811  | GSE360_CTRL_VS_B_MALAYI_HIGH_DOSE_MAC_DN      | 3  | 186 | 16067 | 62   | 4.228148 | 0.034087 |
| brown       | 9891  | GSE36392_TYPE_2_MYELOID_VS_EOSINOPHIL_IL25_TR | 33 | 178 | 16075 | 2190 | 1.375889 | 0.034115 |
| turquoise   | 2132  | AACTGGA,MIR-145                               | 66 | 210 | 16043 | 4169 | 1.225254 | 0.034122 |
| turquoise   | 2457  | MORF_RAC1                                     | 66 | 210 | 16043 | 4169 | 1.225254 | 0.034122 |
| red         | 5608  | AMUNDSON_RESPONSE_TO_ARSENITE                 | 12 | 205 | 16048 | 524  | 1.81564  | 0.034146 |
| lightgreen  | 4844  | SENGUPTA_NASOPHARYNGEAL_CARCINOMA_UP          | 3  | 276 | 15977 | 42   | 4.206263 | 0.034188 |
| green       | 1587  | V\$AP1_Q4                                     | 27 | 233 | 16020 | 1305 | 1.443214 | 0.034235 |
| green       | 5940  | AMIT_SERUM_RESPONSE_40_MCF10A                 | 6  | 31  | 16222 | 1305 | 2.41053  | 0.034319 |
| cyan        | 8697  | GSE1460_DP_THYMOCYTE_VS_NAIVE_CD4_TCELL_COR   | 3  | 150 | 16103 | 77   | 4.221558 | 0.034329 |
| greenyello  | 1318  | RECEPTOR_SIGNALING_PROTEIN_ACTIVITY           | 3  | 77  | 16176 | 150  | 4.221558 | 0.034329 |
| brown       | 1464  | V\$SP1_01                                     | 38 | 210 | 16043 | 2190 | 1.342931 | 0.034335 |
| turquoise   | 1980  | ACTACCT,MIR-196A,MIR-196B                     | 41 | 123 | 16130 | 4169 | 1.299512 | 0.034342 |
| turquoise   | 6556  | BURTON_ADIPOGENESIS_5                         | 41 | 123 | 16130 | 4169 | 1.299512 | 0.034342 |
| tan         | 7820  | WHITFIELD_CELL_CYCLE_G1_S                     | 4  | 137 | 16116 | 145  | 3.272691 | 0.034348 |
| turquoise   | 8985  | GSE17721_LPS_VS_PAM3CSK4_0.5H_BMDM_DN         | 52 | 161 | 16092 | 4169 | 1.259155 | 0.034376 |
| turquoise   | 2127  | ACTGCCT,MIR-34B                               | 62 | 196 | 16057 | 4169 | 1.233211 | 0.034419 |
| turquoise   | 8791  | GSE15930_NAIVE_VS_72H_IN_VITRO_STIM_IL12_CD8_ | 62 | 196 | 16057 | 4169 | 1.233211 | 0.034419 |
| turquoise   | 9252  | GSE19825_CD24LOW_VS_IL2RA_HIGH_DAY3_EFF_CD8   | 62 | 196 | 16057 | 4169 | 1.233211 | 0.034419 |
| grey60      | 3511  | MODULE_19                                     | 3  | 264 | 15989 | 44   | 4.197572 | 0.03442  |
| midnightb   | 1426  | TRANSITION_METAL_ION_TRANSMEMBRANE_TRANSP     | 1  | 8   | 16245 | 71   | 28.61444 | 0.034425 |
| midnightb   | 7183  | CHEN_HOXA5_TARGETS_6HR_UP                     | 1  | 8   | 16245 | 71   | 28.61444 | 0.034425 |
| brown       | 346   | NEGATIVE_REGULATION_OF_CELLULAR_BIOSYNTHETIC  | 7  | 24  | 16229 | 2190 | 2.164593 | 0.034428 |
| brown       | 3028  | BIOCARTA_NTHI_PATHWAY                         | 7  | 24  | 16229 | 2190 | 2.164593 | 0.034428 |
| brown       | 3452  | SA_B_CELL_RECEPTOR_COMPLEXES                  | 7  | 24  | 16229 | 2190 | 2.164593 | 0.034428 |
| brown       | 4039  | PID_INTEGRIN2_PATHWAY                         | 7  | 24  | 16229 | 2190 | 2.164593 | 0.034428 |
| brown       | 4356  | REACTOME_AMINO_ACID_TRANSPORT_ACROSS_THE_I    | 7  | 24  | 16229 | 2190 | 2.164593 | 0.034428 |
| brown       | 7584  | OKAMOTO_LIVER_CANCER_MULTICENTRIC_OCCURREN    | 7  | 24  | 16229 | 2190 | 2.164593 | 0.034428 |
| blue        | 564   | REGULATION_OF_TRANSCRIPTION_FACTOR_ACTIVITY   | 12 | 38  | 16215 | 2978 | 1.723481 | 0.034428 |
| blue        | 7589  | ONO_AML1_TARGETS_DN                           | 12 | 38  | 16215 | 2978 | 1.723481 | 0.034428 |

|            |                                                    |     |     |       |      |          |          |
|------------|----------------------------------------------------|-----|-----|-------|------|----------|----------|
| lightgreen | 6315 GERY_CEBP_TARGETS                             | 2   | 113 | 16140 | 42   | 6.849136 | 0.034435 |
| brown      | 8059 WAKABAYASHI_ADIPOGENESIS_PPARG_RXRA_BOUND     | 129 | 823 | 15430 | 2190 | 1.163267 | 0.03444  |
| green      | 6514 BROWNE_HCMV_INFECTION_8HR_UP                  | 13  | 93  | 16160 | 1305 | 1.740938 | 0.03445  |
| turquoise  | 3944 PID_HDAC_CLASSII_PATHWAY                      | 14  | 34  | 16219 | 4169 | 1.60528  | 0.034459 |
| red        | 1972 CAGTGTT,MIR-141,MIR-200A                      | 15  | 276 | 15977 | 524  | 1.685716 | 0.034462 |
| green      | 897 POLYSACCHARIDE_METABOLIC_PROCESS               | 4   | 16  | 16237 | 1305 | 3.113602 | 0.034492 |
| green      | 2924 BIOCARTA_BCELLSURVIVAL_PATHWAY                | 4   | 16  | 16237 | 1305 | 3.113602 | 0.034492 |
| green      | 4620 REACTOME_PROSTACYCLIN_SIGNALLING_THROUGH_PI   | 4   | 16  | 16237 | 1305 | 3.113602 | 0.034492 |
| green      | 7975 WANG_NFKB_TARGETS                             | 4   | 16  | 16237 | 1305 | 3.113602 | 0.034492 |
| yellow     | 3634 MODULE_149                                    | 7   | 36  | 16217 | 1426 | 2.216203 | 0.034494 |
| purple     | 1585 V\$SRF_Q6                                     | 5   | 186 | 16067 | 157  | 2.782857 | 0.034499 |
| purple     | 1925 V\$MEF2_Q6_01                                 | 5   | 186 | 16067 | 157  | 2.782857 | 0.034499 |
| purple     | 9824 GSE360_DC_VS_MAC_B_MALAYI_HIGH_DOSE_UP        | 5   | 186 | 16067 | 157  | 2.782857 | 0.034499 |
| purple     | 9964 GSE3982_DC_VS_MAC_LPS_STIM_UP                 | 5   | 186 | 16067 | 157  | 2.782857 | 0.034499 |
| greenyello | 3535 MODULE_46                                     | 7   | 332 | 15921 | 150  | 2.284558 | 0.034512 |
| cyan       | 6936 HELLER_HDAC_TARGETS_SILENCED_BY_METHYLATION   | 5   | 381 | 15872 | 77   | 2.770051 | 0.034514 |
| grey60     | 2828 KEGG_AXON_GUIDANCE                            | 2   | 108 | 16145 | 44   | 6.840488 | 0.03453  |
| grey60     | 9238 GSE18791_UNSTIM_VS_NEWCATSLE_VIRUS_DC_1H_UI   | 2   | 108 | 16145 | 44   | 6.840488 | 0.03453  |
| pink       | 543 REGULATION_OF_NUCLEOCYTOPLASMIC_TRANSPORT      | 2   | 21  | 16232 | 228  | 6.789056 | 0.034536 |
| pink       | 925 COFACTOR_BIOSYNTHETIC_PROCESS                  | 2   | 21  | 16232 | 228  | 6.789056 | 0.034536 |
| pink       | 3233 chr4q28                                       | 2   | 21  | 16232 | 228  | 6.789056 | 0.034536 |
| pink       | 5594 DACOSTA_ERCC3_ALLELE_XPCS_VS_TTD_UP           | 2   | 21  | 16232 | 228  | 6.789056 | 0.034536 |
| pink       | 6024 JI_METASTASIS_REPRESSED_BY_STK11              | 2   | 21  | 16232 | 228  | 6.789056 | 0.034536 |
| pink       | 6108 IIZUKA_LIVER_CANCER_PROGRESSION_G2_G3_UP      | 2   | 21  | 16232 | 228  | 6.789056 | 0.034536 |
| pink       | 7097 MISHRA_CARCINOMA_ASSOCIATED_FIBROBLAST_DN     | 2   | 21  | 16232 | 228  | 6.789056 | 0.034536 |
| pink       | 7295 SEKI_INFLAMMATORY_RESPONSE_LPS_DN             | 2   | 21  | 16232 | 228  | 6.789056 | 0.034536 |
| red        | 725 TRANSPORT                                      | 31  | 682 | 15571 | 524  | 1.409872 | 0.034545 |
| lightcyan  | 8931 GSE17721_POLYIC_VS_PAM3CSK4_0.5H_BMDM_DN      | 3   | 187 | 16066 | 62   | 4.205537 | 0.034551 |
| lightcyan  | 9171 GSE17974_CTRL_VS_ACT_IL4_AND_ANTI_IL12_1H_CD4 | 3   | 187 | 16066 | 62   | 4.205537 | 0.034551 |
| lightcyan  | 9591 GSE27786_CD8_TCELL_VS_NKTCELL_DN              | 3   | 187 | 16066 | 62   | 4.205537 | 0.034551 |
| blue       | 6791 DOUGLAS_BMI1_TARGETS_UP                       | 109 | 506 | 15747 | 2978 | 1.175668 | 0.034553 |
| turquoise  | 5152 HAHTOLA_MYCOSIS_FUNGOIDES_SKIN_UP             | 56  | 175 | 16078 | 4169 | 1.247532 | 0.034555 |
| turquoise  | 9097 GSE17721_0.5H_VS_8H_LPS_BMDM_DN               | 56  | 175 | 16078 | 4169 | 1.247532 | 0.034555 |
| turquoise  | 8863 GSE17721_CTRL_VS_POLYIC_24H_BMDM_DN           | 58  | 182 | 16071 | 4169 | 1.242391 | 0.034557 |
| turquoise  | 9299 GSE20715_0H_VS_48H_OZONE_TLR4_KO_LUNG_DN      | 58  | 182 | 16071 | 4169 | 1.242391 | 0.034557 |
| blue       | 2113 TTTGCAG,MIR-518A-2                            | 46  | 194 | 16059 | 2978 | 1.294091 | 0.034569 |
| blue       | 8484 GSE11924_TFH_VS_TH17_CD4_TCELL_UP             | 46  | 194 | 16059 | 2978 | 1.294091 | 0.034569 |
| blue       | 8669 GSE1432_6H_VS_24H_IFNG_MICROGLIA_DN           | 46  | 194 | 16059 | 2978 | 1.294091 | 0.034569 |
| blue       | 9135 GSE17721_4_VS_24H_CPG_BMDM_DN                 | 46  | 194 | 16059 | 2978 | 1.294091 | 0.034569 |
| grey60     | 356 CELL_SURFACE_RECEPTOR_LINKED_SIGNAL_TRANSDUC   | 4   | 457 | 15796 | 44   | 3.233141 | 0.034572 |
| black      | 4626 REACTOME_DESTABILIZATION_OF_MRNA_BY_BRF1      | 2   | 17  | 16236 | 283  | 6.756599 | 0.034591 |
| black      | 4641 REACTOME_DESTABILIZATION_OF_MRNA_BY_KSRP      | 2   | 17  | 16236 | 283  | 6.756599 | 0.034591 |
| black      | 4644 REACTOME_DESTABILIZATION_OF_MRNA_BY_TRISTETI  | 2   | 17  | 16236 | 283  | 6.756599 | 0.034591 |
| black      | 7776 ZEMBUTSU_SENSITIVITY_TO_DOXORUBICIN           | 2   | 17  | 16236 | 283  | 6.756599 | 0.034591 |
| magenta    | 3617 MODULE_129                                    | 5   | 175 | 16078 | 167  | 2.780667 | 0.034604 |
| magenta    | 4565 REACTOME_GPCR_LIGAND_BINDING                  | 6   | 235 | 16018 | 167  | 2.484852 | 0.034611 |
| magenta    | 7936 BRUINS_UVC_RESPONSE_VIA_TP53_GROUP_D          | 6   | 235 | 16018 | 167  | 2.484852 | 0.034611 |
| brown      | 1628 V\$NGFIC_01                                   | 40  | 223 | 16030 | 2190 | 1.331204 | 0.034627 |
| blue       | 5980 MORI_EMU_MYC_LYMPHOMA_BY_ONSET_TIME_UP        | 28  | 109 | 16144 | 2978 | 1.401975 | 0.034636 |
| blue       | 7506 BOYVAULT_LIVER_CANCER_SUBCLASS_G1_UP          | 28  | 109 | 16144 | 2978 | 1.401975 | 0.034636 |
| grey60     | 2762 KEGG_LINOLEIC_ACID_METABOLISM                 | 1   | 13  | 16240 | 44   | 28.41434 | 0.03464  |
| grey60     | 3103 BIOCARTA_LONGEVITY_PATHWAY                    | 1   | 13  | 16240 | 44   | 28.41434 | 0.03464  |
| grey60     | 4014 PID_IL5_PATHWAY                               | 1   | 13  | 16240 | 44   | 28.41434 | 0.03464  |
| grey60     | 4486 REACTOME_OTHER_SEMAPHORIN_INTERACTIONS        | 1   | 13  | 16240 | 44   | 28.41434 | 0.03464  |
| grey60     | 6512 KANG_FLUOROURACIL_RESISTANCE_DN               | 1   | 13  | 16240 | 44   | 28.41434 | 0.03464  |
| grey60     | 7699 DORN_ADENOVIRUS_INFECTION_48HR_UP             | 1   | 13  | 16240 | 44   | 28.41434 | 0.03464  |
| green      | 6813 YANG_MUC2_TARGETS_COLON_3MO_DN                | 2   | 4   | 16249 | 1305 | 6.227203 | 0.034646 |
| green      | 7086 WEBER_METHYLATED_HCP_IN_FIBROBLAST_UP         | 2   | 4   | 16249 | 1305 | 6.227203 | 0.034646 |
| pink       | 6521 NATSUME_RESPONSE_TO_INTERFERON_BETA_DN        | 3   | 51  | 16202 | 228  | 4.19324  | 0.034658 |
| midnightb  | 7688 DANG_REGULATED_BY_MYC_UP                      | 2   | 67  | 16186 | 71   | 6.833298 | 0.034665 |

|             |                                                    |    |     |       |      |          |          |
|-------------|----------------------------------------------------|----|-----|-------|------|----------|----------|
| green       | 10102 GSE39820_CTRL_VS_IL1B_IL6_IL23A_CD4_TCELL_UP | 23 | 192 | 16061 | 1305 | 1.491934 | 0.034667 |
| greenyello  | 1608 V\$TATA_C                                     | 5  | 195 | 16058 | 150  | 2.778291 | 0.034698 |
| greenyello  | 1683 V\$MMEF2_Q6                                   | 5  | 195 | 16058 | 150  | 2.778291 | 0.034698 |
| greenyello  | 1864 V\$CEBP_Q3                                    | 5  | 195 | 16058 | 150  | 2.778291 | 0.034698 |
| greenyello  | 7143 BOQUEST_STEM_CELL_UP                          | 5  | 195 | 16058 | 150  | 2.778291 | 0.034698 |
| greenyello  | 9213 GSE17974_1.5H_VS_72H_IL4_AND_ANTI_IL12_ACT_CD | 5  | 195 | 16058 | 150  | 2.778291 | 0.034698 |
| greenyello  | 9389 GSE22886_CTRL_VS_LPS_24H_DC_DN                | 5  | 195 | 16058 | 150  | 2.778291 | 0.034698 |
| pink        | 3605 MODULE_117                                    | 12 | 472 | 15781 | 228  | 1.812333 | 0.034698 |
| yellow      | 8700 GSE1460_DP_THYMOCYTE_VS_THYMIC_STROMAL_CEL    | 23 | 176 | 16077 | 1426 | 1.489461 | 0.034708 |
| yellow      | 9058 GSE17721_POLYIC_VS_GARDIQUIMOD_1H_BMDM_UP     | 23 | 176 | 16077 | 1426 | 1.489461 | 0.034708 |
| tan         | 7263 BOYLAN_MULTIPLE_MYELOMA_D_UP                  | 3  | 80  | 16173 | 145  | 4.203362 | 0.034718 |
| brown       | 270 SYSTEM_DEVELOPMENT                             | 94 | 583 | 15670 | 2190 | 1.196599 | 0.034724 |
| red         | 9219 GSE18791_CTRL_VS_NEWCASTLE_VIRUS_DC_1H_DN     | 9  | 138 | 16115 | 524  | 2.022859 | 0.034737 |
| purple      | 7866 QI_HYPOXIA                                    | 4  | 127 | 16126 | 157  | 3.260545 | 0.034742 |
| purple      | 7868 GREGORY_SYNTHETIC_LETHAL_WITH_IMATINIB        | 4  | 127 | 16126 | 157  | 3.260545 | 0.034742 |
| brown       | 8389 KAECH_NAIVE_VS_DAY15_EFF_CD8_TCELL_DN         | 35 | 191 | 16062 | 2190 | 1.359954 | 0.034787 |
| brown       | 8549 GSE13411_NAIVE_VS_SWITCHED_MEMORY_BCELL_DN    | 35 | 191 | 16062 | 2190 | 1.359954 | 0.034787 |
| brown       | 8828 GSE17580_UNINFECTED_VS_S_MANSONI_INF_TEFF_UI  | 35 | 191 | 16062 | 2190 | 1.359954 | 0.034787 |
| brown       | 8831 GSE17580_UNINFECTED_VS_S_MANSONI_INF_TREG_D   | 35 | 191 | 16062 | 2190 | 1.359954 | 0.034787 |
| brown       | 9065 GSE17721_POLYIC_VS_GARDIQUIMOD_6H_BMDM_DN     | 35 | 191 | 16062 | 2190 | 1.359954 | 0.034787 |
| yellow      | 305 REGULATION_OF_PROTEIN_KINASE_ACTIVITY          | 19 | 139 | 16114 | 1426 | 1.557947 | 0.034796 |
| greenyello  | 2122 CCCAGAG,MIR-326                               | 4  | 133 | 16120 | 150  | 3.258747 | 0.034807 |
| greenyello  | 3804 MODULE_361                                    | 4  | 133 | 16120 | 150  | 3.258747 | 0.034807 |
| purple      | 2035 CAGGGTC,MIR-504                               | 3  | 74  | 16179 | 157  | 4.19685  | 0.034825 |
| turquoise   | 6011 NIKOLSKY_BREAST_CANCER_19Q13.1_AMPLICON       | 10 | 22  | 16231 | 4169 | 1.772062 | 0.034834 |
| lightyellow | 7580 MIKKELSEN_IPS_LCP_WITH_H3K4ME3                | 2  | 145 | 16108 | 33   | 6.793312 | 0.034846 |
| tan         | 3392 chr6q24                                       | 2  | 33  | 16220 | 145  | 6.793312 | 0.034846 |
| tan         | 6485 VARELA_ZMPSTE24_TARGETS_DN                    | 2  | 33  | 16220 | 145  | 6.793312 | 0.034846 |
| brown       | 2878 KEGG_LEISHMANIA_INFECTION                     | 15 | 68  | 16185 | 2190 | 1.637087 | 0.034865 |
| brown       | 3980 PID_CDC42_PATHWAY                             | 15 | 68  | 16185 | 2190 | 1.637087 | 0.034865 |
| lightcyan   | 6287 HESS_TARGETS_OF_HOXA9_AND_MEIS1_DN            | 2  | 77  | 16176 | 62   | 6.808965 | 0.034888 |
| cyan        | 2451 MORF_PTPRR                                    | 2  | 62  | 16191 | 77   | 6.808965 | 0.034888 |
| cyan        | 5154 HAHTOLA_MYCOSIS_FUNGOIDES_CD4_UP              | 2  | 62  | 16191 | 77   | 6.808965 | 0.034888 |
| cyan        | 5400 DACOSTA_UV_RESPONSE_VIA_ERCC3_TTD_UP          | 2  | 62  | 16191 | 77   | 6.808965 | 0.034888 |
| cyan        | 7550 WOO_LIVER_CANCER_RECURRENCE_DN                | 2  | 62  | 16191 | 77   | 6.808965 | 0.034888 |
| cyan        | 5039 MULLIGHAN_MLL_SIGNATURE_2_DN                  | 4  | 260 | 15993 | 77   | 3.247353 | 0.03492  |
| lightgreen  | 7933 BRUINS_UVC_RESPONSE_VIA_TP53_GROUP_A          | 5  | 709 | 15544 | 42   | 2.729028 | 0.034965 |
| blue        | 1 NUCLEOPLASM                                      | 61 | 267 | 15986 | 2978 | 1.246888 | 0.034984 |
| midnightb   | 8604 GSE13738_RESTING_VS_BYSTANDER_ACTIVATED_CD4_  | 3  | 164 | 16089 | 71   | 4.187479 | 0.035003 |
| midnightb   | 8849 GSE17721_CTRL_VS_POLYIC_0.5H_BMDM_DN          | 3  | 164 | 16089 | 71   | 4.187479 | 0.035003 |
| lightcyan   | 8642 GSE14308_TH1_VS_INDUCED_TREG_UP               | 3  | 188 | 16065 | 62   | 4.183167 | 0.035019 |
| lightcyan   | 8836 GSE17721_CTRL_VS_LPS_2H_BMDM_UP               | 3  | 188 | 16065 | 62   | 4.183167 | 0.035019 |
| lightcyan   | 8929 GSE17721_LPS_VS_POLYIC_24H_BMDM_DN            | 3  | 188 | 16065 | 62   | 4.183167 | 0.035019 |
| lightcyan   | 9064 GSE17721_POLYIC_VS_GARDIQUIMOD_6H_BMDM_UP     | 3  | 188 | 16065 | 62   | 4.183167 | 0.035019 |
| lightcyan   | 9070 GSE17721_POLYIC_VS_GARDIQUIMOD_16H_BMDM_U     | 3  | 188 | 16065 | 62   | 4.183167 | 0.035019 |
| lightcyan   | 9177 GSE17974_CTRL_VS_ACT_IL4_AND_ANTI_IL12_6H_CD4 | 3  | 188 | 16065 | 62   | 4.183167 | 0.035019 |
| lightcyan   | 9819 GSE360_DC_VS_MAC_L_DONOVANI_DN                | 3  | 188 | 16065 | 62   | 4.183167 | 0.035019 |
| greenyello  | 2657 GNF2_JAK1                                     | 2  | 32  | 16221 | 150  | 6.772083 | 0.035028 |
| greenyello  | 2897 KEGG_ALLOGRAFT_REJECTION                      | 2  | 32  | 16221 | 150  | 6.772083 | 0.035028 |
| greenyello  | 5648 DAWSON_METHYLATED_IN_LYMPHOMA_TCL1            | 2  | 32  | 16221 | 150  | 6.772083 | 0.035028 |
| turquoise   | 4118 PID_TGFBRPATHWAY                              | 20 | 53  | 16200 | 4169 | 1.471146 | 0.035047 |
| yellow      | 2349 MORF_ANP32B                                   | 25 | 195 | 16058 | 1426 | 1.461233 | 0.035058 |
| yellow      | 9213 GSE17974_1.5H_VS_72H_IL4_AND_ANTI_IL12_ACT_CD | 25 | 195 | 16058 | 1426 | 1.461233 | 0.035058 |
| yellow      | 9224 GSE18791_CTRL_VS_NEWCASTLE_VIRUS_DC_6H_UP     | 25 | 195 | 16058 | 1426 | 1.461233 | 0.035058 |
| yellow      | 9996 GSE3982_MAST_CELL_VS_NEUTROPHIL_UP            | 25 | 195 | 16058 | 1426 | 1.461233 | 0.035058 |
| blue        | 9279 GSE20366_TREG_VS_NAIVE_CD4_TCELL_DN           | 42 | 175 | 16078 | 2978 | 1.309846 | 0.035062 |
| purple      | 7943 MIYAGAWA_TARGETS_OF_EWSR1_ETS_FUSIONS_DN      | 5  | 187 | 16066 | 157  | 2.767976 | 0.035181 |
| purple      | 9522 GSE2706_2H_VS_8H_R848_STIM_DC_UP              | 5  | 187 | 16066 | 157  | 2.767976 | 0.035181 |
| cyan        | 5183 DELYS_THYROID_CANCER_UP                       | 5  | 383 | 15870 | 77   | 2.755586 | 0.035181 |
| blue        | 8578 GSE13485_CTRL_VS_DAY7_YF17D_VACCINE_PBMIC_UP  | 38 | 156 | 16097 | 2978 | 1.329437 | 0.035189 |

|             |                                                            |     |      |       |      |          |          |
|-------------|------------------------------------------------------------|-----|------|-------|------|----------|----------|
| brown       | 542 LEUKOCYTE_CHEMOTAXIS                                   | 4   | 10   | 16243 | 2190 | 2.968584 | 0.035201 |
| brown       | 721 POSITIVE_REGULATION_OF_PROTEIN_SECRETION               | 4   | 10   | 16243 | 2190 | 2.968584 | 0.035201 |
| brown       | 4272 REACTOME_REVERSIBLE_HYDRATION_OF_CARBON_DIOXIDE       | 4   | 10   | 16243 | 2190 | 2.968584 | 0.035201 |
| brown       | 4621 REACTOME_GABA_SYNTHESIS_RELEASE_REUPTAKE_AND_REUPTAKE | 4   | 10   | 16243 | 2190 | 2.968584 | 0.035201 |
| brown       | 4672 REACTOME_IL_6_SIGNALING                               | 4   | 10   | 16243 | 2190 | 2.968584 | 0.035201 |
| brown       | 6043 ROZANOV_MMP14_CORRELATED                              | 4   | 10   | 16243 | 2190 | 2.968584 | 0.035201 |
| brown       | 7757 RAMPON_ENRICHED_LEARNING_ENVIRONMENT_EARLY            | 4   | 10   | 16243 | 2190 | 2.968584 | 0.035201 |
| brown       | 7772 VISALA_AGING_LYMPHOCYTE_UP                            | 4   | 10   | 16243 | 2190 | 2.968584 | 0.035201 |
| brown       | 8165 LIM_MAMMARY_LUMINAL_PROGENITOR_DN                     | 4   | 10   | 16243 | 2190 | 2.968584 | 0.035201 |
| red         | 1738 V\$FOXO1_01                                           | 11  | 183  | 16070 | 524  | 1.86442  | 0.035202 |
| red         | 8922 GSE17721_LPS_VS_POLYIC_8H_BMDM_UP                     | 11  | 183  | 16070 | 524  | 1.86442  | 0.035202 |
| red         | 9501 GSE2706_UNSTIM_VS_8H_R848_DC_DN                       | 11  | 183  | 16070 | 524  | 1.86442  | 0.035202 |
| red         | 9668 GSE29618_BCELL_VS_PDC_DAY7_FLU_VACCINE_UP             | 11  | 183  | 16070 | 524  | 1.86442  | 0.035202 |
| tan         | 3196 chr19p                                                | 1   | 4    | 16249 | 145  | 28.02241 | 0.035214 |
| red         | 7237 WANG_TUMOR_INVASIVENESS_DN                            | 12  | 206  | 16047 | 524  | 1.806826 | 0.035247 |
| brown       | 7958 LINSLEY_MIR16_TARGETS                                 | 37  | 204  | 16049 | 2190 | 1.346049 | 0.035278 |
| lightyellow | 6567 BROWNE_HCMV_INFECTION_14HR_UP                         | 2   | 146  | 16107 | 33   | 6.746783 | 0.035285 |
| blue        | 2920 BIOCARTA_CHEMICAL_PATHWAY                             | 8   | 22   | 16231 | 2978 | 1.984614 | 0.035296 |
| blue        | 6222 FLECHNER_BIOPSY_KIDNEY_TRANSPLANT_OK_VS_DONOR         | 8   | 22   | 16231 | 2978 | 1.984614 | 0.035296 |
| green       | 3600 MODULE_112                                            | 21  | 172  | 16081 | 1305 | 1.520596 | 0.035316 |
| magenta     | 1735 V\$TBP_01                                             | 5   | 176  | 16077 | 167  | 2.764868 | 0.035331 |
| magenta     | 6972 OUILLETTE_CLL_13Q14_DELETION_UP                       | 3   | 70   | 16183 | 167  | 4.171001 | 0.035345 |
| magenta     | 7294 SEKI_INFLAMMATORY_RESPONSE_LPS_UP                     | 3   | 70   | 16183 | 167  | 4.171001 | 0.035345 |
| pink        | 3675 MODULE_195                                            | 5   | 129  | 16124 | 228  | 2.762988 | 0.035349 |
| greenyellow | 10192 GSE7852_TREG_VS_TCONV_LN_UP                          | 5   | 196  | 16057 | 150  | 2.764116 | 0.035351 |
| pink        | 8963 GSE17721_PAM3CSK4_VS_CPG_16H_BMDM_DN                  | 6   | 173  | 16080 | 228  | 2.472315 | 0.035353 |
| turquoise   | 469 SPHINGOLIPID_METABOLIC_PROCESS                         | 11  | 25   | 16228 | 4169 | 1.715356 | 0.035365 |
| turquoise   | 2665 GNF2_MBD4                                             | 11  | 25   | 16228 | 4169 | 1.715356 | 0.035365 |
| turquoise   | 4669 REACTOME_ENDOSOMAL_SORTING_COMPLEX_REQUIREMENT        | 11  | 25   | 16228 | 4169 | 1.715356 | 0.035365 |
| turquoise   | 7449 CHEOK_RESPONSE_TO_MERCAPTOPYRIMIDINE_AND_HDN          | 11  | 25   | 16228 | 4169 | 1.715356 | 0.035365 |
| blue        | 233 NUCLEAR_CHROMOSOME_PART                                | 11  | 34   | 16219 | 2978 | 1.765723 | 0.035369 |
| blue        | 2768 KEGG_PYRUVATE_METABOLISM                              | 11  | 34   | 16219 | 2978 | 1.765723 | 0.035369 |
| blue        | 3983 PID_ATM_PATHWAY                                       | 11  | 34   | 16219 | 2978 | 1.765723 | 0.035369 |
| blue        | 4474 REACTOME_MRNA_3_END_PROCESSING                        | 11  | 34   | 16219 | 2978 | 1.765723 | 0.035369 |
| blue        | 4547 REACTOME_GLUCOSE_TRANSPORT                            | 11  | 34   | 16219 | 2978 | 1.765723 | 0.035369 |
| yellow      | 8679 GSE1448_CTRL_VS_ANTI_VALPHA2_DP_THYMOCYTE_DN          | 22  | 167  | 16086 | 1426 | 1.501482 | 0.035395 |
| blue        | 4914 DIAZ_CHRONIC_MEYLOGENOUS_LEUKEMIA_UP                  | 278 | 1378 | 14875 | 2978 | 1.101043 | 0.035411 |
| salmon      | 7992 BILANGES_RAPAMYCIN_SENSITIVE_GENES                    | 2   | 38   | 16215 | 127  | 6.735599 | 0.035462 |
| greenyellow | 2804 KEGG_ERBB_SIGNALING_PATHWAY                           | 3   | 78   | 16175 | 150  | 4.167436 | 0.035467 |
| greenyellow | 5949 LIN_SILENCED_BY_TUMOR_MICROENVIRONMENT                | 3   | 78   | 16175 | 150  | 4.167436 | 0.035467 |
| greenyellow | 6182 SWEET_KRAS_TARGETS_UP                                 | 3   | 78   | 16175 | 150  | 4.167436 | 0.035467 |
| lightcyan   | 8514 GSE12845_IGD_NEG_BLOOD_VS_PRE_GC_TONSIL_BCE           | 3   | 189  | 16064 | 62   | 4.161034 | 0.035489 |
| lightcyan   | 8717 GSE14769_UNSTIM_VS_40MIN_LPS_BMDM_DN                  | 3   | 189  | 16064 | 62   | 4.161034 | 0.035489 |
| yellow      | 6218 PENG_RAPAMYCIN_RESPONSE_DN                            | 30  | 243  | 16010 | 1426 | 1.407113 | 0.035503 |
| yellow      | 3476 ST_T_CELL_SIGNAL_TRANSDUCTION                         | 8   | 44   | 16209 | 1426 | 2.072294 | 0.03553  |
| yellow      | 7800 WHITFIELD_CELL_CYCLE_LITERATURE                       | 8   | 44   | 16209 | 1426 | 2.072294 | 0.03553  |
| brown       | 2847 KEGG_B_CELL_RECEPTOR_SIGNALING_PATHWAY                | 16  | 74   | 16179 | 2190 | 1.60464  | 0.035535 |
| brown       | 5433 HUMMERICH_SKIN_CANCER_PROGRESSION_UP                  | 16  | 74   | 16179 | 2190 | 1.60464  | 0.035535 |
| magenta     | 882 REGULATION_OF_LYMPHOCYTE_ACTIVATION                    | 2   | 29   | 16224 | 167  | 6.711955 | 0.03554  |
| magenta     | 7677 CHIARETTI_T_ALL_REFRACTORY_TO_THERAPY                 | 2   | 29   | 16224 | 167  | 6.711955 | 0.03554  |
| midnightb   | 4933 DOANE_RESPONSE_TO_ANDROGEN_UP                         | 3   | 165  | 16088 | 71   | 4.1621   | 0.035542 |
| midnightb   | 5392 EBAUER_TARGETS_OF_PAX3_FOXO1_FUSION_UP                | 3   | 165  | 16088 | 71   | 4.1621   | 0.035542 |
| brown       | 4629 REACTOME_CIRCADIAN_CLOCK                              | 12  | 51   | 16202 | 2190 | 1.746226 | 0.035547 |
| brown       | 5057 PAPANICOLAOS_UNSTABLE_ATHEROSCLEROTIC_PLAQUE          | 12  | 51   | 16202 | 2190 | 1.746226 | 0.035547 |
| brown       | 6574 ZHANG_PROLIFERATING_VS_QUIESCENT                      | 12  | 51   | 16202 | 2190 | 1.746226 | 0.035547 |
| brown       | 6880 RIGGINS_TAMOXIFEN_RESISTANCE_UP                       | 12  | 51   | 16202 | 2190 | 1.746226 | 0.035547 |
| red         | 7277 TOOKER_GEMCITABINE_RESISTANCE_DN                      | 8   | 117  | 16136 | 524  | 2.120833 | 0.035551 |
| lightgreen  | 8242 RELA_DN.V1_UP                                         | 2   | 115  | 16138 | 42   | 6.730021 | 0.035556 |
| lightgreen  | 8295 BMI1_DN_MEL18_DN.V1_DN                                | 2   | 115  | 16138 | 42   | 6.730021 | 0.035556 |
| lightgreen  | 900 NEGATIVE_REGULATION_OF_TRANSCRIPTION_FACTOR_BINDING    | 1   | 14   | 16239 | 42   | 27.64116 | 0.03559  |

|             |                                                  |     |      |       |      |          |          |
|-------------|--------------------------------------------------|-----|------|-------|------|----------|----------|
| lightgreen  | 1404 AMINE_BINDING                               | 1   | 14   | 16239 | 42   | 27.64116 | 0.03559  |
| lightgreen  | 4428 REACTOME_AMINE_LIGAND_BINDING_RECEPTORS     | 1   | 14   | 16239 | 42   | 27.64116 | 0.03559  |
| lightgreen  | 4679 REACTOME_SYNTHESIS_OF_VERY_LONG_CHAIN_FATTY | 1   | 14   | 16239 | 42   | 27.64116 | 0.03559  |
| lightgreen  | 5116 MOROSETTI_FACIOSCAPULOHUMERAL_MUSCULAR_DI'  | 1   | 14   | 16239 | 42   | 27.64116 | 0.03559  |
| lightgreen  | 6460 ZHENG_RESPONSE_TO_ARSENITE_DN               | 1   | 14   | 16239 | 42   | 27.64116 | 0.03559  |
| lightgreen  | 6942 AMUNDSON_GAMMA_RADIATION_RESISTANCE         | 1   | 14   | 16239 | 42   | 27.64116 | 0.03559  |
| lightgreen  | 7321 PARK_APL_PATHOGENESIS_UP                    | 1   | 14   | 16239 | 42   | 27.64116 | 0.03559  |
| purple      | 8552 GSE13411_NAIVE_VS_MEMORY_BCELL_UP           | 4   | 128  | 16125 | 157  | 3.235072 | 0.035602 |
| brown       | 5498 MYLLYKANGAS_AMPLIFICATION_HOT_SPOT_13       | 3   | 6    | 16247 | 2190 | 3.710731 | 0.035605 |
| brown       | 5754 OHM_EMBRYONIC_CARCINOMA_UP                  | 3   | 6    | 16247 | 2190 | 3.710731 | 0.035605 |
| brown       | 7198 THUM_MIR21_TARGETS_HEART_DISEASE_DN         | 3   | 6    | 16247 | 2190 | 3.710731 | 0.035605 |
| brown       | 7541 YAMASHITA_LIVER_CANCER_WITH_EPCAM_DN        | 3   | 6    | 16247 | 2190 | 3.710731 | 0.035605 |
| brown       | 2261 GGGAGGRR_V\$MAZ_Q6                          | 279 | 1879 | 14374 | 2190 | 1.101963 | 0.035614 |
| greenyello  | 8441 GSE10463_CD40L_AND_VA347_VS_CD40L_IN_DC_DN  | 4   | 134  | 16119 | 150  | 3.234428 | 0.03563  |
| brown       | 5570 PATIL_LIVER_CANCER                          | 111 | 700  | 15553 | 2190 | 1.176832 | 0.035644 |
| brown       | 8938 GSE17721_POLYIC_VS_PAM3CSK4_6H_BMDM_UP      | 34  | 185  | 16068 | 2190 | 1.363944 | 0.035689 |
| turquoise   | 3802 MODULE_358                                  | 27  | 76   | 16177 | 4169 | 1.385007 | 0.035701 |
| turquoise   | 6155 NELSON_RESPONSE_TO_ANDROGEN_UP              | 27  | 76   | 16177 | 4169 | 1.385007 | 0.035701 |
| grey60      | 735 CELLULAR_HOMEOSTASIS                         | 2   | 110  | 16143 | 44   | 6.716116 | 0.035706 |
| blue        | 9498 GSE2706_UNSTIM_VS_2H_R848_DC_UP             | 43  | 180  | 16073 | 2978 | 1.303781 | 0.035707 |
| turquoise   | 1501 V\$GATA2_01                                 | 30  | 86   | 16167 | 4169 | 1.359955 | 0.035711 |
| turquoise   | 7152 LABBE_TARGETS_OF_TGFB1_AND_WNT3A_DN         | 30  | 86   | 16167 | 4169 | 1.359955 | 0.035711 |
| lightcyan   | 6630 LEE_AGING_CEREBELLUM_UP                     | 2   | 78   | 16175 | 62   | 6.721671 | 0.03572  |
| lightcyan   | 7150 LABBE_TGFB1_TARGETS_DN                      | 2   | 78   | 16175 | 62   | 6.721671 | 0.03572  |
| lightyellow | 8760 GSE15659_RESTING_VS_ACTIVATED_TREG_UP       | 2   | 147  | 16106 | 33   | 6.700886 | 0.035727 |
| lightyellow | 9920 GSE36476_YOUNG_VS_OLD_DONOR_MEMORY_CD4_T    | 2   | 147  | 16106 | 33   | 6.700886 | 0.035727 |
| lightyellow | 10217 GSE8515_CTRL_VS_IL6_4H_STIM_MAC_DN         | 2   | 147  | 16106 | 33   | 6.700886 | 0.035727 |
| blue        | 1804 V\$PEA3_Q6                                  | 55  | 238  | 16015 | 2978 | 1.261231 | 0.035747 |
| purple      | 4805 NAKAMURA_TUMOR_ZONE_PERIPHERAL_VS_CENTRAL   | 6   | 252  | 16001 | 157  | 2.464816 | 0.035762 |
| blue        | 8024 GOBERT_OLIGODENDROCYTE_DIFFERENTIATION_DN   | 202 | 983  | 15270 | 2978 | 1.121519 | 0.035766 |
| blue        | 2918 BIOCARTA_ASBCELL_PATHWAY                    | 5   | 11   | 16242 | 2978 | 2.480768 | 0.035772 |
| blue        | 2954 BIOCARTA_CYTOKINE_PATHWAY                   | 5   | 11   | 16242 | 2978 | 2.480768 | 0.035772 |
| blue        | 4188 REACTOME_DOWNREGULATION_OF_ERBB2_ERBB3_SI   | 5   | 11   | 16242 | 2978 | 2.480768 | 0.035772 |
| blue        | 4459 REACTOME_ACTIVATION_OF_CHAPERONES_BY_ATF6_  | 5   | 11   | 16242 | 2978 | 2.480768 | 0.035772 |
| blue        | 4714 REACTOME_UNWINDING_OF_DNA                   | 5   | 11   | 16242 | 2978 | 2.480768 | 0.035772 |
| blue        | 5508 MATTIOLI_MULTIPLE_MYELOMA_SUBGROUPS         | 5   | 11   | 16242 | 2978 | 2.480768 | 0.035772 |
| blue        | 5921 PETRETTO_BLOOD_PRESSURE_UP                  | 5   | 11   | 16242 | 2978 | 2.480768 | 0.035772 |
| blue        | 6080 IIZUKA_LIVER_CANCER_PROGRESSION_L1_G1_DN    | 5   | 11   | 16242 | 2978 | 2.480768 | 0.035772 |
| blue        | 6263 ABBUD_LIF_SIGNALING_2_UP                    | 5   | 11   | 16242 | 2978 | 2.480768 | 0.035772 |
| blue        | 6684 KALMA_E2F1_TARGETS                          | 5   | 11   | 16242 | 2978 | 2.480768 | 0.035772 |
| blue        | 5988 KAUFFMANN_DNA_REPLICATION_GENES             | 35  | 142  | 16111 | 2978 | 1.345205 | 0.035797 |
| green       | 4112 PID_FGF_PATHWAY                             | 8   | 48   | 16205 | 1305 | 2.075734 | 0.035843 |
| green       | 6627 BURTON_ADIPOGENESIS_PEAK_AT_2HR             | 8   | 48   | 16205 | 1305 | 2.075734 | 0.035843 |
| purple      | 85 CYTOSOL                                       | 5   | 188  | 16065 | 157  | 2.753252 | 0.035871 |
| purple      | 9412 GSE24142_DN2_VS_DN3_THYMOCYTE_UP            | 5   | 188  | 16065 | 157  | 2.753252 | 0.035871 |
| purple      | 10196 GSE7852_TREG_VS_TCONV_FAT_UP               | 5   | 188  | 16065 | 157  | 2.753252 | 0.035871 |
| purple      | 10201 GSE7852_LN_VS_FAT_TREG_DN                  | 5   | 188  | 16065 | 157  | 2.753252 | 0.035871 |
| greenyello  | 293 NERVOUS_SYSTEM_DEVELOPMENT                   | 6   | 264  | 15989 | 150  | 2.462576 | 0.035872 |
| turquoise   | 4907 THUM_SYSTOLIC_HEART_FAILURE_DN              | 65  | 207  | 16046 | 4169 | 1.224178 | 0.035896 |
| brown       | 6932 HELLER_SILENCED_BY_METHYLATION_UP           | 43  | 243  | 16010 | 2190 | 1.313263 | 0.035896 |
| purple      | 3065 BIOCARTA_RHO_PATHWAY                        | 2   | 31   | 16222 | 157  | 6.678858 | 0.035905 |
| purple      | 5160 PACHER_TARGETS_OF_IGF1_AND_IGF2_UP          | 2   | 31   | 16222 | 157  | 6.678858 | 0.035905 |
| purple      | 7138 GRADE_COLON_CANCER_DN                       | 2   | 31   | 16222 | 157  | 6.678858 | 0.035905 |
| purple      | 7195 CONRAD_STEM_CELL                            | 2   | 31   | 16222 | 157  | 6.678858 | 0.035905 |
| purple      | 7338 POTTI_CYTOXAN_SENSITIVITY                   | 2   | 31   | 16222 | 157  | 6.678858 | 0.035905 |
| purple      | 7473 ZHAN_V1_LATE_DIFFERENTIATION_GENES_UP       | 2   | 31   | 16222 | 157  | 6.678858 | 0.035905 |
| red         | 731 HOMEOSTATIC_PROCESS                          | 10  | 161  | 16092 | 524  | 1.926533 | 0.035923 |
| cyan        | 6414 NATSUME_RESPONSE_TO_INTERFERON_BETA_UP      | 2   | 63   | 16190 | 77   | 6.700886 | 0.035924 |
| cyan        | 7247 BEIER_GLIOMA_STEM_CELL_DN                   | 2   | 63   | 16190 | 77   | 6.700886 | 0.035924 |
| brown       | 6164 SMITH_LIVER_CANCER                          | 10  | 40   | 16213 | 2190 | 1.855365 | 0.035935 |

|             |       |                                               |    |      |       |      |          |          |
|-------------|-------|-----------------------------------------------|----|------|-------|------|----------|----------|
| purple      | 2259  | CTTTGT_V\$LEF1_Q2                             | 23 | 1608 | 14645 | 157  | 1.480729 | 0.035939 |
| lightyellow | 3070  | BIOCARTA_ERK5_PATHWAY                         | 1  | 18   | 16235 | 33   | 27.36195 | 0.035942 |
| lightyellow | 4234  | REACTOME_PROLONGED_ERK_ACTIVATION_EVENTS      | 1  | 18   | 16235 | 33   | 27.36195 | 0.035942 |
| lightyellow | 5937  | AMIT_EGF_RESPONSE_240_MCF10A                  | 1  | 18   | 16235 | 33   | 27.36195 | 0.035942 |
| lightyellow | 6046  | LANDEMAINE_LUNG_METASTASIS                    | 1  | 18   | 16235 | 33   | 27.36195 | 0.035942 |
| lightyellow | 6184  | MAGRANGEAS_MULTIPLE_MYELOMA_IGG_VS_IGA_UP     | 1  | 18   | 16235 | 33   | 27.36195 | 0.035942 |
| lightyellow | 6440  | MARCHINI TRABECTEDIN_RESISTANCE_UP            | 1  | 18   | 16235 | 33   | 27.36195 | 0.035942 |
| blue        | 6546  | DASU_IL6_SIGNALING_SCAR_UP                    | 10 | 30   | 16223 | 2978 | 1.81923  | 0.035963 |
| lightcyan   | 8476  | GSE11864_CSF1_IFNG_VS_CSF1_IFNG_PAM3CYS_IN_M  | 3  | 190  | 16063 | 62   | 4.139134 | 0.035963 |
| lightcyan   | 8497  | GSE12366_GC_VS_MEMORY_BCELL_DN                | 3  | 190  | 16063 | 62   | 4.139134 | 0.035963 |
| lightcyan   | 8607  | GSE13738_TCR_VS_BYSTANDER_ACTIVATED_CD4_TCEI  | 3  | 190  | 16063 | 62   | 4.139134 | 0.035963 |
| lightcyan   | 9035  | GSE17721_PAM3CSK4_VS_GADIQUIMOD_16H_BMDM      | 3  | 190  | 16063 | 62   | 4.139134 | 0.035963 |
| lightcyan   | 9109  | GSE17721_0.5H_VS_24H_POLYIC_BMDM_DN           | 3  | 190  | 16063 | 62   | 4.139134 | 0.035963 |
| lightcyan   | 9260  | GSE20366_EX_VIVO_VS_HOMEOSTATIC_CONVERSION    | 3  | 190  | 16063 | 62   | 4.139134 | 0.035963 |
| lightcyan   | 9430  | GSE24142_ADULT_VS_FETAL_DN3_THYMOCYTE_UP      | 3  | 190  | 16063 | 62   | 4.139134 | 0.035963 |
| lightcyan   | 10054 | GSE3982_NEUTROPHIL_VS_NKCELL_UP               | 3  | 190  | 16063 | 62   | 4.139134 | 0.035963 |
| lightcyan   | 10239 | GSE9006_TYPE_1_VS_TYPE_2_DIABETES_PBMC_AT_DX  | 3  | 190  | 16063 | 62   | 4.139134 | 0.035963 |
| lightcyan   | 10287 | GSE9988_LOW_LPS_VS_ANTI_TREM1_AND_LPS_MONC    | 3  | 190  | 16063 | 62   | 4.139134 | 0.035963 |
| blue        | 10086 | GSE3982_EFF_MEMORY_CD4_TCELL_VS_TH1_UP        | 39 | 161  | 16092 | 2978 | 1.322049 | 0.035988 |
| greenyello  | 1752  | V\$MAZR_01                                    | 5  | 197  | 16056 | 150  | 2.750085 | 0.036013 |
| purple      | 6458  | KAYO_CALORIE_RESTRICTION_MUSCLE_DN            | 3  | 75   | 16178 | 157  | 4.140892 | 0.036026 |
| blue        | 2732  | KEGG_ALANINE_ASPARTATE_AND_Glutamate_META     | 9  | 26   | 16227 | 2978 | 1.8892   | 0.03603  |
| blue        | 2771  | KEGG_BUTANOATE_METABOLISM                     | 9  | 26   | 16227 | 2978 | 1.8892   | 0.03603  |
| blue        | 3277  | chr20q12                                      | 9  | 26   | 16227 | 2978 | 1.8892   | 0.03603  |
| blue        | 4418  | REACTOME_ASSOCIATION_OF_TRIC_CCT_WITH_TARGE   | 9  | 26   | 16227 | 2978 | 1.8892   | 0.03603  |
| blue        | 4961  | WIKMAN_ASBESTOS_LUNG_CANCER_DN                | 9  | 26   | 16227 | 2978 | 1.8892   | 0.03603  |
| blue        | 5136  | MAYBURD_RESPONSE_TO_L663536_UP                | 9  | 26   | 16227 | 2978 | 1.8892   | 0.03603  |
| yellow      | 8744  | GSE15659_NAIVE_VS_PTPRC_NEG_CD4_TCELL_UP      | 21 | 158  | 16095 | 1426 | 1.514873 | 0.03603  |
| magenta     | 8861  | GSE17721_CTRL_VS_POLYIC_12H_BMDM_DN           | 5  | 177  | 16076 | 167  | 2.749247 | 0.036068 |
| red         | 2756  | KEGG_GLYCEROLIPID_METABOLISM                  | 4  | 39   | 16214 | 524  | 3.181249 | 0.03608  |
| red         | 6594  | GENTILE_UV_RESPONSE_CLUSTER_D2                | 4  | 39   | 16214 | 524  | 3.181249 | 0.03608  |
| turquoise   | 10238 | GSE9006_TYPE_1_VS_TYPE_2_DIABETES_PBMC_AT_DX  | 63 | 200  | 16053 | 4169 | 1.228039 | 0.036083 |
| cyan        | 5312  | MCBRYAN_PUBERTAL_TGFB1_TARGETS_UP             | 3  | 153  | 16100 | 77   | 4.138783 | 0.036083 |
| cyan        | 9150  | GSE17974_0H_VS_0.5H_IN_VITRO_ACT_CD4_TCELL_UI | 3  | 153  | 16100 | 77   | 4.138783 | 0.036083 |
| midnightb   | 8490  | GSE11924_TH2_VS_TH17_CD4_TCELL_UP             | 3  | 166  | 16087 | 71   | 4.137027 | 0.036086 |
| midnightb   | 9848  | GSE360_T_GONDII_VS_B_MALAYI_HIGH_DOSE_DC_UP   | 3  | 166  | 16087 | 71   | 4.137027 | 0.036086 |
| midnightb   | 9883  | GSE360_T_GONDII_VS_M_TUBERCULOSIS_MAC_DN      | 3  | 166  | 16087 | 71   | 4.137027 | 0.036086 |
| lightgreen  | 276   | ENZYME_LINKED_RECEPTOR_PROTEIN_SIGNALING_PA1  | 2  | 116  | 16137 | 42   | 6.672003 | 0.036121 |
| lightgreen  | 7249  | VART_KSHV_INFECTION_ANGIOGENIC_MARKERS_DN     | 2  | 116  | 16137 | 42   | 6.672003 | 0.036121 |
| lightgreen  | 4828  | ONKEN_UVEAL_MELANOMA_DN                       | 4  | 486  | 15767 | 42   | 3.184989 | 0.036127 |
| red         | 996   | ION_TRANSPORT                                 | 9  | 139  | 16114 | 524  | 2.008306 | 0.03613  |
| salmon      | 5620  | MARTORIATI_MDM4_TARGETS_NEUROEPITHELIUM_UI    | 4  | 159  | 16094 | 127  | 3.219532 | 0.036138 |
| lightyellow | 3659  | MODULE_176                                    | 2  | 148  | 16105 | 33   | 6.65561  | 0.036172 |
| turquoise   | 8411  | GSE10239_NAIVE_VS_KLRG1HIGH_EFF_CD8_TCELL_DN  | 61 | 193  | 16060 | 4169 | 1.23218  | 0.036232 |
| turquoise   | 9731  | GSE31082_DN_VS_DP_THYMOCYTE_DN                | 61 | 193  | 16060 | 4169 | 1.23218  | 0.036232 |
| brown       | 4829  | BERTUCCI_MEDULLARY_VS_DUCTAL_BREAST_CANCER    | 36 | 198  | 16055 | 2190 | 1.349357 | 0.036239 |
| brown       | 9475  | GSE26495_NAIVE_VS_PD1LOW_CD8_TCELL_DN         | 36 | 198  | 16055 | 2190 | 1.349357 | 0.036239 |
| red         | 4645  | REACTOME_INTERFERON_GAMMA_SIGNALING           | 5  | 57   | 16196 | 524  | 2.720805 | 0.036248 |
| red         | 5955  | WANG_PROSTATE_CANCER_ANDROGEN_INDEPENDEN      | 5  | 57   | 16196 | 524  | 2.720805 | 0.036248 |
| red         | 7268  | BOYLAN_MULTIPLE_MYELOMA_C_DN                  | 5  | 57   | 16196 | 524  | 2.720805 | 0.036248 |
| brown       | 137   | CELL_PROJECTION                               | 19 | 92   | 16161 | 2190 | 1.532693 | 0.036248 |
| brown       | 5113  | ELVIDGE_HIF1A_AND_HIF2A_TARGETS_DN            | 19 | 92   | 16161 | 2190 | 1.532693 | 0.036248 |
| grey60      | 1951  | TGGTGCT,MIR-29A,MIR-29B,MIR-29C               | 4  | 464  | 15789 | 44   | 3.184365 | 0.036253 |
| blue        | 9619  | GSE28237_FOLLICULAR_VS_EARLY_GC_BCELL_DN      | 44 | 185  | 16068 | 2978 | 1.298045 | 0.036319 |
| blue        | 10178 | GSE7460_WT_VS_FOXP3_HET_ACT_TCONV_UP          | 44 | 185  | 16068 | 2978 | 1.298045 | 0.036319 |
| cyan        | 6957  | MARTINEZ_RB1_AND_TP53_TARGETS_UP              | 6  | 519  | 15734 | 77   | 2.440207 | 0.036327 |
| pink        | 225   | PLASMA_MEMBRANE_PART                          | 19 | 867  | 15386 | 228  | 1.562188 | 0.036332 |
| turquoise   | 1572  | V\$OCT1_06                                    | 59 | 186  | 16067 | 4169 | 1.236633 | 0.03634  |
| turquoise   | 9004  | GSE17721_POLYIC_VS_CPG_1H_BMDM_UP             | 59 | 186  | 16067 | 4169 | 1.236633 | 0.03634  |
| turquoise   | 10244 | GSE9037_CTRL_VS_LPS_1H_STIM_IRAK4_KO_BMDM_U   | 59 | 186  | 16067 | 4169 | 1.236633 | 0.03634  |

|            |                                                   |    |      |       |      |          |          |
|------------|---------------------------------------------------|----|------|-------|------|----------|----------|
| turquoise  | 9776 GSE339_CD4POS_VS_CD4CD8DN_DC_IN_CULTURE_UP   | 53 | 165  | 16088 | 4169 | 1.252257 | 0.036361 |
| red        | 1969 TACTTGA,MIR-26A,MIR-26B                      | 15 | 278  | 15975 | 524  | 1.673589 | 0.036364 |
| red        | 5622 MARTORIATI_MDM4_TARGETS_FETAL_LIVER_UP       | 12 | 207  | 16046 | 524  | 1.798097 | 0.036373 |
| green      | 2409 MORF_JAK3                                    | 11 | 75   | 16178 | 1305 | 1.826646 | 0.036381 |
| green      | 2447 MORF_PTEN                                    | 11 | 75   | 16178 | 1305 | 1.826646 | 0.036381 |
| blue       | 202 TRANSCRIPTION_FACTOR_COMPLEX                  | 22 | 82   | 16171 | 2978 | 1.464258 | 0.036383 |
| blue       | 4944 BORCZUK_MALIGNANT_MESOTHELIOMA_DN            | 22 | 82   | 16171 | 2978 | 1.464258 | 0.036383 |
| red        | 8503 GSE12366_NAIVE_VS_MEMORY_BCELL_DN            | 11 | 184  | 16069 | 524  | 1.854288 | 0.036403 |
| red        | 8944 GSE17721_POLYIC_VS_PAM3CSK4_16H_BMDM_UP      | 11 | 184  | 16069 | 524  | 1.854288 | 0.036403 |
| red        | 9849 GSE360_T_GONDII_VS_B_MALAYI_HIGH_DOSE_DC_DN  | 11 | 184  | 16069 | 524  | 1.854288 | 0.036403 |
| red        | 10158 GSE7460_CD8_TCELL_VS_TREG_ACT_UP            | 11 | 184  | 16069 | 524  | 1.854288 | 0.036403 |
| turquoise  | 10273 GSE9988_ANTI_TREM1_VS_ANTI_TREM1_AND_LPS_M  | 55 | 172  | 16081 | 4169 | 1.246625 | 0.036411 |
| greenyello | 4732 REACTOME_BINDING_AND_ENTRY_OF_HIV_VIRION     | 1  | 4    | 16249 | 150  | 27.08833 | 0.036412 |
| greenyello | 5566 BEGUM_TARGETS_OF_PAX3_FOXO1_FUSION_AND_PA    | 1  | 4    | 16249 | 150  | 27.08833 | 0.036412 |
| greenyello | 7056 SMID_BREAST_CANCER_RELAPSE_IN_LIVER_UP       | 1  | 4    | 16249 | 150  | 27.08833 | 0.036412 |
| greenyello | 7834 NOUSHMEHR_GBM_GERMLINE_MUTATED               | 1  | 4    | 16249 | 150  | 27.08833 | 0.036412 |
| black      | 8089 DELACROIX_RAR_TARGETS_UP                     | 3  | 42   | 16211 | 283  | 4.102221 | 0.036414 |
| magenta    | 2203 TTANTCA_UNKNOWN                              | 13 | 725  | 15528 | 167  | 1.745108 | 0.036426 |
| lightcyan  | 8803 GSE15930_STIM_VS_STIM_AND_IL-12_48H_CD8_T_CE | 3  | 191  | 16062 | 62   | 4.117463 | 0.03644  |
| lightcyan  | 8826 GSE17580_TREG_VS_TEFF_S_MANSONI_INF_UP       | 3  | 191  | 16062 | 62   | 4.117463 | 0.03644  |
| lightcyan  | 9145 GSE17721_0.5H_VS_24H_GARDIQUIMOD_BMDM_DN     | 3  | 191  | 16062 | 62   | 4.117463 | 0.03644  |
| turquoise  | 8007 TORCHIA_TARGETS_OF_EWSR1_FLI1_FUSION_DN      | 93 | 307  | 15946 | 4169 | 1.18099  | 0.036469 |
| yellow     | 5120 GRAHAM_CML_QUIESCENT_VS_NORMAL_QUIESCENT_    | 13 | 86   | 16167 | 1426 | 1.722895 | 0.036487 |
| green      | 1671 V\$OCT1_B                                    | 23 | 193  | 16060 | 1305 | 1.484204 | 0.036487 |
| green      | 9975 GSE3982_EOSINOPHIL_VS_MAC_DN                 | 23 | 193  | 16060 | 1305 | 1.484204 | 0.036487 |
| black      | 8987 GSE17721_LPS_VS_PAM3CSK4_1H_BMDM_DN          | 7  | 178  | 16075 | 283  | 2.258526 | 0.036493 |
| green      | 2421 MORF_MLLT10                                  | 26 | 224  | 16029 | 1305 | 1.445601 | 0.036542 |
| red        | 2933 BIOCARTA_CASPASE_PATHWAY                     | 3  | 23   | 16230 | 524  | 4.045719 | 0.036554 |
| lightcyan  | 5065 ODONNELL_TARGETS_OF_MYC_AND_TFRC_UP          | 2  | 79   | 16174 | 62   | 6.636586 | 0.03656  |
| purple     | 8823 GSE16755_CTRL_VS_IFNA_TREATED_MAC_DN         | 5  | 189  | 16064 | 157  | 2.738685 | 0.03657  |
| purple     | 8827 GSE17580_TREG_VS_TEFF_S_MANSONI_INF_DN       | 5  | 189  | 16064 | 157  | 2.738685 | 0.03657  |
| purple     | 9427 GSE24142_ADULT_VS_FETAL_EARLY_THYMIC_PROGEN  | 5  | 189  | 16064 | 157  | 2.738685 | 0.03657  |
| turquoise  | 2631 GNF2_CKS2                                    | 19 | 50   | 16203 | 4169 | 1.481444 | 0.036593 |
| turquoise  | 4662 REACTOME_DESTABILIZATION_OF_MRNA_BY_AUF1_H   | 19 | 50   | 16203 | 4169 | 1.481444 | 0.036593 |
| yellow     | 8756 GSE15659_CD45RA_NEG_CD4_TCELL_VS_ACTIVATED_1 | 20 | 149  | 16104 | 1426 | 1.529881 | 0.036598 |
| brown      | 8525 GSE13229_IMM_VS_MATURE_NKCELL_DN             | 33 | 179  | 16074 | 2190 | 1.368202 | 0.036601 |
| greenyello | 5065 ODONNELL_TARGETS_OF_MYC_AND_TFRC_UP          | 3  | 79   | 16174 | 150  | 4.114684 | 0.036625 |
| midnightb  | 1553 V\$OCT1_04                                   | 3  | 167  | 16086 | 71   | 4.112254 | 0.036634 |
| midnightb  | 9134 GSE17721_4_VS_24H_CPG_BMDM_UP                | 3  | 167  | 16086 | 71   | 4.112254 | 0.036634 |
| cyan       | 10182 GSE7460_CTRL_VS_FOXP3_OVEREXPR_TCONV_UP     | 3  | 154  | 16099 | 77   | 4.111908 | 0.036678 |
| greenyello | 2007 CTATGCA,MIR-153                              | 5  | 198  | 16055 | 150  | 2.736195 | 0.036681 |
| magenta    | 4731 REACTOME_IMMUNE_SYSTEM                       | 14 | 801  | 15452 | 167  | 1.701032 | 0.036683 |
| yellow     | 10005 GSE3982_MAST_CELL_VS_CENT_MEMORY_CD4_TCELL  | 23 | 177  | 16076 | 1426 | 1.481046 | 0.03671  |
| yellow     | 616 NEGATIVE_REGULATION_OF_DNA_BINDING            | 4  | 15   | 16238 | 1426 | 3.039364 | 0.036752 |
| yellow     | 765 NEGATIVE_REGULATION_OF_MAP_KINASE_ACTIVITY    | 4  | 15   | 16238 | 1426 | 3.039364 | 0.036752 |
| yellow     | 816 G1_PHASE                                      | 4  | 15   | 16238 | 1426 | 3.039364 | 0.036752 |
| yellow     | 970 BASE_EXCISION_REPAIR                          | 4  | 15   | 16238 | 1426 | 3.039364 | 0.036752 |
| yellow     | 2773 KEGG_RIBOFLAVIN_METABOLISM                   | 4  | 15   | 16238 | 1426 | 3.039364 | 0.036752 |
| yellow     | 4121 REACTOME_GLYCOGEN_BREAKDOWN_GLYCOGENOLYS     | 4  | 15   | 16238 | 1426 | 3.039364 | 0.036752 |
| pink       | 6553 BROWNE_HCMV_INFECTION_48HR_DN                | 11 | 423  | 15830 | 228  | 1.853749 | 0.036754 |
| tan        | 5608 AMUNDSON_RESPONSE_TO_ARSENITE                | 5  | 205  | 16048 | 145  | 2.733894 | 0.036784 |
| tan        | 5003 GARGALOVIC_RESPONSE_TO_OXIDIZED_PHOSPHOLIPID | 2  | 34   | 16219 | 145  | 6.593509 | 0.036811 |
| magenta    | 1814 V\$AP3_Q6                                    | 5  | 178  | 16075 | 167  | 2.733802 | 0.036814 |
| magenta    | 9148 GSE17721_12H_VS_24H_GARDIQUIMOD_BMDM_UP      | 5  | 178  | 16075 | 167  | 2.733802 | 0.036814 |
| turquoise  | 2634 GNF2_DDX5                                    | 23 | 63   | 16190 | 4169 | 1.423275 | 0.036839 |
| green      | 2411 MORF_KDR                                     | 10 | 66   | 16187 | 1305 | 1.887031 | 0.036852 |
| turquoise  | 5134 WAMUNYOKOLI_OVARIAN_CANCER_GRADES_1_2_UP     | 42 | 127  | 16126 | 4169 | 1.28928  | 0.036876 |
| pink       | 8188 ZWANG_TRANSIENTLY_UP_BY_2ND_EGF_PULSE_ONLY   | 22 | 1044 | 15209 | 228  | 1.502176 | 0.036881 |
| grey60     | 1508 V\$EVI1_05                                   | 2  | 112  | 16141 | 44   | 6.596185 | 0.036897 |
| blue       | 8544 GSE13306_RA_VS_UNTREATED_MEM_CD4_TCELL_UP    | 45 | 190  | 16063 | 2978 | 1.292611 | 0.036899 |



|             |       |                                                     |     |     |       |      |          |          |
|-------------|-------|-----------------------------------------------------|-----|-----|-------|------|----------|----------|
| blue        | 8939  | GSE17721_POLYIC_VS_PAM3CSK4_6H_BMDM_DN              | 45  | 190 | 16063 | 2978 | 1.292611 | 0.036899 |
| lightcyan   | 8556  | GSE13411_IGM_MEMORY_BCELL_VS_PLASMA_CELL_U          | 3   | 192 | 16061 | 62   | 4.096018 | 0.036921 |
| lightcyan   | 9262  | GSE20366_EX_VIVO_VS_DEC205_CONVERSION_UP            | 3   | 192 | 16061 | 62   | 4.096018 | 0.036921 |
| lightcyan   | 10050 | GSE3982_NEUTROPHIL_VS_EFF_MEMORY_CD4_TCELL_         | 3   | 192 | 16061 | 62   | 4.096018 | 0.036921 |
| turquoise   | 3721  | MODULE_252                                          | 70  | 225 | 16028 | 4169 | 1.212878 | 0.036949 |
| greenyello  | 1943  | CTACCTC,LET-7A,LET-7B,LET-7C,LET-7D,LET-7E,LET-7F,M | 7   | 337 | 15916 | 150  | 2.250663 | 0.036951 |
| blue        | 7703  | WONG_EMBRYONIC_STEM_CELL_CORE                       | 73  | 327 | 15926 | 2978 | 1.218383 | 0.036958 |
| yellow      | 9440  | GSE24634_TREG_VS_TCONV_POST_DAY3_IL4_CONVER         | 25  | 196 | 16057 | 1426 | 1.453778 | 0.036966 |
| yellow      | 10200 | GSE7852_LN_VS_FAT_TREG_UP                           | 25  | 196 | 16057 | 1426 | 1.453778 | 0.036966 |
| cyan        | 4189  | REACTOME_ANTIVIRAL_MECHANISM_BY_IFN_STIMUL/         | 2   | 64  | 16189 | 77   | 6.596185 | 0.036971 |
| turquoise   | 7846  | KIM_ALL_DISORDERS_OLIGODENDROCYTE_NUMBER_C          | 205 | 717 | 15536 | 4169 | 1.114644 | 0.036973 |
| cyan        | 8349  | STK33_UP                                            | 4   | 265 | 15988 | 77   | 3.186082 | 0.037049 |
| blue        | 280   | POSITIVE_REGULATION_OF_TRANSCRIPTIONDNA_DEPE        | 27  | 105 | 16148 | 2978 | 1.403406 | 0.037066 |
| greenyello  | 429   | AXONOGENESIS                                        | 2   | 33  | 16220 | 150  | 6.566869 | 0.037066 |
| greenyello  | 2895  | KEGG_AUTOIMMUNE_THYROID_DISEASE                     | 2   | 33  | 16220 | 150  | 6.566869 | 0.037066 |
| greenyello  | 3200  | chr16q13                                            | 2   | 33  | 16220 | 150  | 6.566869 | 0.037066 |
| lightyellow | 7745  | SENGUPTA_EBNA1_ANTICORRELATED                       | 2   | 150 | 16103 | 33   | 6.566869 | 0.037066 |
| lightyellow | 8758  | GSE15659_RESTING_TREG_VS_NONSUPPRESSIVE_TCEL        | 2   | 150 | 16103 | 33   | 6.566869 | 0.037066 |
| pink        | 8988  | GSE17721_LPS_VS_PAM3CSK4_2H_BMDM_UP                 | 6   | 175 | 16078 | 228  | 2.44406  | 0.037069 |
| red         | 7111  | BOCHKIS_FOXA2_TARGETS                               | 19  | 377 | 15876 | 524  | 1.5632   | 0.037102 |
| red         | 1566  | V\$RORA2_01                                         | 8   | 118 | 16135 | 524  | 2.102859 | 0.03711  |
| magenta     | 9187  | GSE17974_IL4_AND_ANTI_IL12_VS_UNTREATED_0.5H_       | 4   | 122 | 16131 | 167  | 3.19093  | 0.037145 |
| yellow      | 420   | REGULATION_OF_TRANSLATIONAL_INITIATION              | 6   | 29  | 16224 | 1426 | 2.358127 | 0.037157 |
| purple      | 7415  | HAN_SATB1_TARGETS_DN                                | 8   | 393 | 15860 | 157  | 2.107324 | 0.037181 |
| brown       | 4543  | REACTOME_CELL_JUNCTION_ORGANIZATION                 | 13  | 57  | 16196 | 2190 | 1.692614 | 0.037183 |
| midnightb   | 9797  | GSE360_CTRL_VS_T_GONDII_DC_DN                       | 3   | 168 | 16085 | 71   | 4.087777 | 0.037187 |
| midnightb   | 10007 | GSE3982_MAST_CELL_VS_NKCELL_DN                      | 3   | 168 | 16085 | 71   | 4.087777 | 0.037187 |
| salmon      | 2683  | GNF2_PPP6C                                          | 2   | 39  | 16214 | 127  | 6.562891 | 0.037192 |
| salmon      | 7880  | FIGUEROA_AML_METHYLATION_CLUSTER_1_DN               | 2   | 39  | 16214 | 127  | 6.562891 | 0.037192 |
| cyan        | 6955  | MARTINEZ_TP53_TARGETS_UP                            | 6   | 522 | 15731 | 77   | 2.426183 | 0.037201 |
| red         | 691   | RESPONSE_TO_BIOTIC_STIMULUS                         | 7   | 97  | 16156 | 524  | 2.238353 | 0.037206 |
| red         | 3924  | MODULE_576                                          | 7   | 97  | 16156 | 524  | 2.238353 | 0.037206 |
| red         | 4674  | REACTOME_SIGNALING_BY_NOTCH                         | 7   | 97  | 16156 | 524  | 2.238353 | 0.037206 |
| red         | 5284  | WANG_ESOPHAGUS_CANCER_VS_NORMAL_DN                  | 7   | 97  | 16156 | 524  | 2.238353 | 0.037206 |
| red         | 5956  | SUNG_METASTASIS_STROMA_UP                           | 7   | 97  | 16156 | 524  | 2.238353 | 0.037206 |
| magenta     | 4831  | SCHUETZ_BREAST_CANCER_DUCTAL_INVASIVE_UP            | 7   | 303 | 15950 | 167  | 2.248394 | 0.037208 |
| brown       | 8924  | GSE17721_LPS_VS_POLYIC_12H_BMDM_UP                  | 35  | 192 | 16061 | 2190 | 1.352871 | 0.037218 |
| brown       | 9528  | GSE27786_LSK_VS_LIN_NEG_CELL_UP                     | 35  | 192 | 16061 | 2190 | 1.352871 | 0.037218 |
| brown       | 9697  | GSE29618_PRE_VS_DAY7_POST_TIV_FLU_VACCINE_PD        | 35  | 192 | 16061 | 2190 | 1.352871 | 0.037218 |
| yellow      | 3239  | chr7q22                                             | 14  | 95  | 16158 | 1426 | 1.679649 | 0.037221 |
| purple      | 7878  | DUTERTRE ESTRADIOL_RESPONSE_24HR_DN                 | 9   | 466 | 15787 | 157  | 1.999358 | 0.037222 |
| purple      | 6155  | NELSON_RESPONSE_TO_ANDROGEN_UP                      | 3   | 76  | 16177 | 157  | 4.086406 | 0.037249 |
| grey60      | 673   | RESPONSE_TO_TEMPERATURE_STIMULUS                    | 1   | 14  | 16239 | 44   | 26.38474 | 0.037256 |
| grey60      | 1164  | THIOLESTER_HYDROLASE_ACTIVITY                       | 1   | 14  | 16239 | 44   | 26.38474 | 0.037256 |
| grey60      | 1990  | GCGCCTT,MIR-525,MIR-524                             | 1   | 14  | 16239 | 44   | 26.38474 | 0.037256 |
| grey60      | 3869  | MODULE_462                                          | 1   | 14  | 16239 | 44   | 26.38474 | 0.037256 |
| grey60      | 6812  | YANG_MUC2_TARGETS_DUODENUM_6MO_DN                   | 1   | 14  | 16239 | 44   | 26.38474 | 0.037256 |
| lightgreen  | 4450  | REACTOME_G_ALPHA_Q_SIGNALLING_EVENTS                | 2   | 118 | 16135 | 42   | 6.558918 | 0.037263 |
| lightgreen  | 10278 | GSE9988_LPS_VS_LOW_LPS_MONOCYTE_UP                  | 2   | 118 | 16135 | 42   | 6.558918 | 0.037263 |
| purple      | 9105  | GSE17721_0.5H_VS_4H_POLYIC_BMDM_DN                  | 5   | 190 | 16063 | 157  | 2.724271 | 0.037277 |
| cyan        | 8212  | CYCLIN_D1_UP.V1_UP                                  | 3   | 155 | 16098 | 77   | 4.085379 | 0.037278 |
| cyan        | 2944  | BIOCARTA_CLASSIC_PATHWAY                            | 1   | 8   | 16245 | 77   | 26.38474 | 0.037286 |
| cyan        | 3447  | ST_INTERFERON_GAMMA_PATHWAY                         | 1   | 8   | 16245 | 77   | 26.38474 | 0.037286 |
| blue        | 1533  | V\$MYCMAX_01                                        | 52  | 224 | 16029 | 2978 | 1.266964 | 0.03733  |
| greenyello  | 8702  | GSE1460_CD4_THYMOCYTE_VS_NAIVE_CD4_TCELL_CC         | 5   | 199 | 16054 | 150  | 2.722446 | 0.037358 |
| greenyello  | 9324  | GSE22886_CD8_TCELL_VS_BCELL_NAIVE_UP                | 5   | 199 | 16054 | 150  | 2.722446 | 0.037358 |
| purple      | 9248  | GSE19825_NAIVE_VS_IL2RALOW_DAY3_EFF_CD8_TCEL        | 4   | 130 | 16123 | 157  | 3.185301 | 0.037361 |
| brown       | 1019  | POSITIVE_REGULATION_OF_TRANSCRIPTION                | 25  | 129 | 16124 | 2190 | 1.438268 | 0.037398 |
| lightcyan   | 8411  | GSE10239_NAIVE_VS_KLRG1HIGH_EFF_CD8_TCELL_DN        | 3   | 193 | 16060 | 62   | 4.074795 | 0.037404 |
| lightcyan   | 9464  | GSE25087_FETAL_VS_ADULT_TREG_UP                     | 3   | 193 | 16060 | 62   | 4.074795 | 0.037404 |

|             |                                                       |    |     |       |      |          |          |
|-------------|-------------------------------------------------------|----|-----|-------|------|----------|----------|
| lightcyan   | 9676 GSE29618_PDC_VS_MDC_DAY7_FLU_VACCINE_UP          | 3  | 193 | 16060 | 62   | 4.074795 | 0.037404 |
| lightcyan   | 600 CELLULAR_CATION_HOMEOSTASIS                       | 2  | 80  | 16173 | 62   | 6.553629 | 0.037407 |
| lightcyan   | 3609 MODULE_121                                       | 2  | 80  | 16173 | 62   | 6.553629 | 0.037407 |
| brown       | 5105 ELVIDGE_HYPOXIA_UP                               | 29 | 154 | 16099 | 2190 | 1.397548 | 0.037421 |
| blue        | 9344 GSE22886_IGM_MEMORY_BCELL_VS_BM_PLASMA_CE        | 46 | 195 | 16058 | 2978 | 1.287455 | 0.037448 |
| blue        | 8465 GSE11864_UNTREATED_VS_CSF1_PAM3CYS_IN_MAC_I      | 41 | 171 | 16082 | 2978 | 1.308569 | 0.037462 |
| lightcyan   | 101 VACUOLAR_PART                                     | 1  | 10  | 16243 | 62   | 26.21452 | 0.037509 |
| lightcyan   | 123 LYSOSOMAL_MEMBRANE                                | 1  | 10  | 16243 | 62   | 26.21452 | 0.037509 |
| lightcyan   | 140 VACUOLAR_MEMBRANE                                 | 1  | 10  | 16243 | 62   | 26.21452 | 0.037509 |
| lightcyan   | 588 REGULATION_OF_HOMEOSTATIC_PROCESS                 | 1  | 10  | 16243 | 62   | 26.21452 | 0.037509 |
| lightcyan   | 670 SYNAPSE_ORGANIZATION_AND_BIOGENESIS               | 1  | 10  | 16243 | 62   | 26.21452 | 0.037509 |
| lightcyan   | 2959 BIOCARTA_RNA_PATHWAY                             | 1  | 10  | 16243 | 62   | 26.21452 | 0.037509 |
| lightcyan   | 3909 MODULE_540                                       | 1  | 10  | 16243 | 62   | 26.21452 | 0.037509 |
| lightcyan   | 5354 SHIRAIISHI_PLZF_TARGETS_UP                       | 1  | 10  | 16243 | 62   | 26.21452 | 0.037509 |
| lightcyan   | 5822 GOUYER_TATI_TARGETS_UP                           | 1  | 10  | 16243 | 62   | 26.21452 | 0.037509 |
| lightcyan   | 7018 WORSCHECH_TUMOR_REJECTION_DN                     | 1  | 10  | 16243 | 62   | 26.21452 | 0.037509 |
| lightcyan   | 7102 EHLERS_ANEUPLOIDY_DN                             | 1  | 10  | 16243 | 62   | 26.21452 | 0.037509 |
| lightcyan   | 7697 DORN_ADENOVIRUS_INFECTIION_32HR_UP               | 1  | 10  | 16243 | 62   | 26.21452 | 0.037509 |
| lightyellow | 428 CARBOXYLIC_ACID_METABOLIC_PROCESS                 | 2  | 151 | 16102 | 33   | 6.523379 | 0.037517 |
| turquoise   | 6525 WANG_CISPLATIN_RESPONSE_AND_XPC_DN               | 66 | 211 | 16042 | 4169 | 1.219448 | 0.037522 |
| red         | 2166 CTTTGA,MIR-527                                   | 12 | 208 | 16045 | 524  | 1.789452 | 0.037524 |
| midnightb   | 2692 GNF2_RBBP6                                       | 2  | 70  | 16183 | 71   | 6.540443 | 0.03755  |
| salmon      | 2873 KEGG_HUNTINGTONS_DISEASE                         | 4  | 161 | 16092 | 127  | 3.179537 | 0.037567 |
| salmon      | 3193 chr22q13                                         | 4  | 161 | 16092 | 127  | 3.179537 | 0.037567 |
| magenta     | 10155 GSE7460_CTRL_VS_TGFB_TREATED_ACT_CD8_TCELL_D    | 5  | 179 | 16074 | 167  | 2.718529 | 0.03757  |
| turquoise   | 1098 PHOSPHOTRANSFERASE_ACTIVITY_ALCOHOL_GROUP_I      | 94 | 311 | 15942 | 4169 | 1.178336 | 0.037625 |
| red         | 8280 MTOR_UP.N4.V1_UP                                 | 11 | 185 | 16068 | 524  | 1.844264 | 0.037633 |
| red         | 8958 GSE17721_PAM3CSK4_VS_CPG_8H_BMDM_UP              | 11 | 185 | 16068 | 524  | 1.844264 | 0.037633 |
| red         | 9086 GSE17721_LPS_VS_GARDIQUIMOD_12H_BMDM_UP          | 11 | 185 | 16068 | 524  | 1.844264 | 0.037633 |
| red         | 9087 GSE17721_LPS_VS_GARDIQUIMOD_12H_BMDM_DN          | 11 | 185 | 16068 | 524  | 1.844264 | 0.037633 |
| red         | 9176 GSE17974_CTRL_VS_ACT_IL4_AND_ANTI_IL12_6H_CD4    | 11 | 185 | 16068 | 524  | 1.844264 | 0.037633 |
| red         | 9765 GSE3337_4H_VS_16H_IFNG_IN_CD8POS_DC_DN           | 11 | 185 | 16068 | 524  | 1.844264 | 0.037633 |
| blue        | 2390 MORF_FANCG                                       | 37 | 152 | 16101 | 2978 | 1.328517 | 0.037633 |
| blue        | 10140 GSE6269_E_COLI_VS_STREP_AUREUS_INF_PBMC_UP      | 37 | 152 | 16101 | 2978 | 1.328517 | 0.037633 |
| pink        | 655 SECONDARY_METABOLIC_PROCESS                       | 2  | 22  | 16231 | 228  | 6.480463 | 0.037645 |
| pink        | 788 REGULATION_OF_INTRACELLULAR_TRANSPORT             | 2  | 22  | 16231 | 228  | 6.480463 | 0.037645 |
| pink        | 1081 SYMPORTER_ACTIVITY                               | 2  | 22  | 16231 | 228  | 6.480463 | 0.037645 |
| pink        | 3238 chr4q22                                          | 2  | 22  | 16231 | 228  | 6.480463 | 0.037645 |
| pink        | 4959 NOJIMA_SFRP2_TARGETS_DN                          | 2  | 22  | 16231 | 228  | 6.480463 | 0.037645 |
| pink        | 6150 MAGRANGEAS_MULTIPLE_MYELOMA_IGG_VS_IGA_DN        | 2  | 22  | 16231 | 228  | 6.480463 | 0.037645 |
| pink        | 6198 MAGRANGEAS_MULTIPLE_MYELOMA_IGLL_VS_IGLK_D       | 2  | 22  | 16231 | 228  | 6.480463 | 0.037645 |
| pink        | 3494 MODULE_1                                         | 9  | 321 | 15932 | 228  | 1.998647 | 0.037668 |
| green       | 5339 DARWICHE_SQUAMOUS_CELL_CARCINOMA_DN              | 19 | 153 | 16100 | 1305 | 1.546626 | 0.037691 |
| yellow      | 244 DNA_REPAIR                                        | 17 | 122 | 16131 | 1426 | 1.588192 | 0.037695 |
| green       | 9216 GSE18148_CFBF_KO_VS_WT_TREG_UP                   | 18 | 143 | 16110 | 1305 | 1.567687 | 0.037704 |
| grey60      | 7934 BRUINS_UVC_RESPONSE_VIA_TP53_GROUP_B             | 4  | 470 | 15783 | 44   | 3.143714 | 0.037732 |
| midnightb   | 10113 GSE39820_IL1B_IL6_VS_IL1B_IL6_IL23A_TREATED_CD4 | 3  | 169 | 16084 | 71   | 4.063589 | 0.037743 |
| midnightb   | 10214 GSE8515_CTRL_VS_IL1_4H_STIM_MAC_UP              | 3  | 169 | 16084 | 71   | 4.063589 | 0.037743 |
| yellow      | 6109 NING_CHRONIC_OBSTRUCTIVE_PULMONARY_DISEASE_      | 16 | 113 | 16140 | 1426 | 1.613822 | 0.037765 |
| red         | 3684 MODULE_204                                       | 6  | 77  | 16176 | 524  | 2.416923 | 0.037791 |
| greenyello  | 6402 REN_ALVEOLAR_RHABDOMYOSARCOMA_UP                 | 3  | 80  | 16173 | 150  | 4.06325  | 0.037803 |
| greenyello  | 6584 BURTON_ADIPOGENESIS_8                            | 3  | 80  | 16173 | 150  | 4.06325  | 0.037803 |
| pink        | 3588 MODULE_100                                       | 11 | 425 | 15828 | 228  | 1.845026 | 0.037821 |
| pink        | 7061 SMID_BREAST_CANCER_LUMINAL_B_DN                  | 11 | 425 | 15828 | 228  | 1.845026 | 0.037821 |
| magenta     | 3235 chr6p25                                          | 2  | 30  | 16223 | 167  | 6.488224 | 0.037827 |
| magenta     | 5447 AIGNER_ZEB1_TARGETS                              | 2  | 30  | 16223 | 167  | 6.488224 | 0.037827 |
| magenta     | 6546 DASU_IL6_SIGNALING_SCAR_UP                       | 2  | 30  | 16223 | 167  | 6.488224 | 0.037827 |
| magenta     | 7811 BAE_BRCA1_TARGETS_DN                             | 2  | 30  | 16223 | 167  | 6.488224 | 0.037827 |
| magenta     | 8175 GHANDHI_DIRECT_IRRADIATION_DN                    | 2  | 30  | 16223 | 167  | 6.488224 | 0.037827 |
| pink        | 341 MEMBRANE_LIPID_METABOLIC_PROCESS                  | 4  | 90  | 16163 | 228  | 3.168226 | 0.037832 |

|             |                                                    |    |      |       |      |          |          |
|-------------|----------------------------------------------------|----|------|-------|------|----------|----------|
| pink        | 5434 HUMMERICH_SKIN_CANCER_PROGRESSION_DN          | 4  | 90   | 16163 | 228  | 3.168226 | 0.037832 |
| yellow      | 832 REGULATION_OF_NEUROGENESIS                     | 3  | 9    | 16244 | 1426 | 3.799205 | 0.037857 |
| yellow      | 1051 REGULATION_OF_ENDOTHELIAL_CELL_PROLIFERATION  | 3  | 9    | 16244 | 1426 | 3.799205 | 0.037857 |
| yellow      | 4647 REACTOME_TRAF6_MEDIATED_IRF7_ACTIVATION_IN_I  | 3  | 9    | 16244 | 1426 | 3.799205 | 0.037857 |
| yellow      | 4917 CASORELLI_APL_SECONDARY_VS_DE_NOVO_DN         | 3  | 9    | 16244 | 1426 | 3.799205 | 0.037857 |
| yellow      | 5613 SASAKI_TARGETS_OF_TP73_AND_TP63               | 3  | 9    | 16244 | 1426 | 3.799205 | 0.037857 |
| cyan        | 9239 GSE18791_UNSTIM_VS_NEWCATSLE_VIRUS_DC_1H_DI   | 3  | 156  | 16097 | 77   | 4.059191 | 0.037883 |
| red         | 4585 REACTOME_METABOLISM_OF_LIPIDS_AND_LIPOPROTEI  | 20 | 403  | 15850 | 524  | 1.539314 | 0.037885 |
| lightcyan   | 8811 GSE15930_STIM_VS_STIM_AND_IFNAB_72H_CD8_T_C   | 3  | 194  | 16059 | 62   | 4.053791 | 0.037891 |
| lightcyan   | 9006 GSE17721_POLYIC_VS_CPG_2H_BMDM_UP             | 3  | 194  | 16059 | 62   | 4.053791 | 0.037891 |
| lightcyan   | 9116 GSE17721_0.5H_VS_4H_PAM3CSK4_BMDM_UP          | 3  | 194  | 16059 | 62   | 4.053791 | 0.037891 |
| lightcyan   | 9334 GSE22886_NAIVE_BCELL_VS_BLOOD_PLASMA_CELL_UI  | 3  | 194  | 16059 | 62   | 4.053791 | 0.037891 |
| lightcyan   | 9441 GSE24634_TREG_VS_TCONV_POST_DAY3_IL4_CONVERT  | 3  | 194  | 16059 | 62   | 4.053791 | 0.037891 |
| lightcyan   | 9968 GSE3982_MAC_VS_NEUTROPHIL_LPS_STIM_UP         | 3  | 194  | 16059 | 62   | 4.053791 | 0.037891 |
| lightcyan   | 10270 GSE9988_ANTI_TREM1_VS_LOW_LPS_MONOCYTE_UP    | 3  | 194  | 16059 | 62   | 4.053791 | 0.037891 |
| yellow      | 8420 GSE10239_MEMORY_VS_DAY4.5_EFF_CD8_TCELL_UP    | 24 | 187  | 16066 | 1426 | 1.462796 | 0.037892 |
| yellow      | 9407 GSE24102_GRANULOCYSTIC_MDSC_VS_NEUTROPHIL_I   | 24 | 187  | 16066 | 1426 | 1.462796 | 0.037892 |
| yellow      | 9417 GSE24142_EARLY_THYMIC_PROGENITOR_VS_DN3_THY   | 24 | 187  | 16066 | 1426 | 1.462796 | 0.037892 |
| yellow      | 9566 GSE27786_BCELL_VS_NKCELL_UP                   | 24 | 187  | 16066 | 1426 | 1.462796 | 0.037892 |
| yellow      | 10213 GSE8384_CTRL_VS_B_ABORTUS_4H_MAC_CELL_LINE_I | 24 | 187  | 16066 | 1426 | 1.462796 | 0.037892 |
| lightyellow | 481 POSITIVE_REGULATION_OF_TRANSPORT               | 1  | 19   | 16234 | 33   | 25.92185 | 0.037901 |
| lightyellow | 1339 EXONUCLEASE_ACTIVITY                          | 1  | 19   | 16234 | 33   | 25.92185 | 0.037901 |
| lightyellow | 3120 BIOCARTA_ACTINY_PATHWAY                       | 1  | 19   | 16234 | 33   | 25.92185 | 0.037901 |
| lightyellow | 3408 chr2p12                                       | 1  | 19   | 16234 | 33   | 25.92185 | 0.037901 |
| lightyellow | 5624 LI_WILMS_TUMOR_ANAPLASTIC_UP                  | 1  | 19   | 16234 | 33   | 25.92185 | 0.037901 |
| lightyellow | 6362 RORIE_TARGETS_OF_EWSR1_FLI1_FUSION_DN         | 1  | 19   | 16234 | 33   | 25.92185 | 0.037901 |
| brown       | 1690 V\$AREB6_03                                   | 39 | 218  | 16035 | 2190 | 1.327693 | 0.037924 |
| magenta     | 5147 RODRIGUES_THYROID_CARCINOMA_DN                | 3  | 72   | 16181 | 167  | 4.05514  | 0.037947 |
| magenta     | 6847 LEIN_PONS_MARKERS                             | 3  | 72   | 16181 | 167  | 4.05514  | 0.037947 |
| magenta     | 6854 GAVIN_FOXP3_TARGETS_CLUSTER_P2                | 3  | 72   | 16181 | 167  | 4.05514  | 0.037947 |
| turquoise   | 9349 GSE22886_DAY0_VS_DAY7_MONOCYTE_IN_CULTURE_    | 62 | 197  | 16056 | 4169 | 1.226951 | 0.037973 |
| purple      | 1726 V\$GATA6_01                                   | 5  | 191  | 16062 | 157  | 2.710008 | 0.037992 |
| purple      | 5013 TAKEDA_TARGETS_OF_NUP98_HOXA9_FUSION_8D_DN    | 5  | 191  | 16062 | 157  | 2.710008 | 0.037992 |
| purple      | 8828 GSE17580_UNINFECTED_VS_S_MANSONI_INF_TEFF_UI  | 5  | 191  | 16062 | 157  | 2.710008 | 0.037992 |
| purple      | 10186 GSE7764_NKCELL_VS_SPLENOCYTE_UP              | 5  | 191  | 16062 | 157  | 2.710008 | 0.037992 |
| brown       | 1824 GCCNNWTAAR_UNKNOWN                            | 24 | 123  | 16130 | 2190 | 1.44809  | 0.037999 |
| cyan        | 7311 LINDSTEDT_DENDRITIC_CELL_MATURATION_C         | 2  | 65   | 16188 | 77   | 6.494705 | 0.03803  |
| cyan        | 7705 NAKAYAMA_SOFT_TISSUE_TUMORS_PCA1_UP           | 2  | 65   | 16188 | 77   | 6.494705 | 0.03803  |
| greenyello  | 7827 KARLSSON_TGFB1_TARGETS_DN                     | 5  | 200  | 16053 | 150  | 2.708833 | 0.038042 |
| purple      | 3037 BIOCARTA_PDGF_PATHWAY                         | 2  | 32   | 16221 | 157  | 6.470143 | 0.038061 |
| purple      | 4587 REACTOME_SIGNAL_TRANSDUCTION_BY_L1            | 2  | 32   | 16221 | 157  | 6.470143 | 0.038061 |
| purple      | 5758 COWLING_MYCN_TARGETS                          | 2  | 32   | 16221 | 157  | 6.470143 | 0.038061 |
| purple      | 6709 SEMENZA_HIF1_TARGETS                          | 2  | 32   | 16221 | 157  | 6.470143 | 0.038061 |
| purple      | 7469 ZHAN_LATE_DIFFERENTIATION_GENES_UP            | 2  | 32   | 16221 | 157  | 6.470143 | 0.038061 |
| greenyello  | 2261 GGGAGGRR_V\$MAZ_Q6                            | 25 | 1879 | 14374 | 150  | 1.441636 | 0.038065 |
| lightgreen  | 141 ACTIN_FILAMENT                                 | 1  | 15   | 16238 | 42   | 25.79841 | 0.038085 |
| lightgreen  | 616 NEGATIVE_REGULATION_OF_DNA_BINDING             | 1  | 15   | 16238 | 42   | 25.79841 | 0.038085 |
| lightgreen  | 776 DEFENSE_RESPONSE_TO_BACTERIUM                  | 1  | 15   | 16238 | 42   | 25.79841 | 0.038085 |
| lightgreen  | 1070 INORGANIC_ANION_TRANSMEMBRANE_TRANSPORTER     | 1  | 15   | 16238 | 42   | 25.79841 | 0.038085 |
| lightgreen  | 2957 BIOCARTA_DC_PATHWAY                           | 1  | 15   | 16238 | 42   | 25.79841 | 0.038085 |
| lightgreen  | 5365 MARKS_HDAC_TARGETS_DN                         | 1  | 15   | 16238 | 42   | 25.79841 | 0.038085 |
| lightgreen  | 5543 HERNANDEZ_MITOTIC_ARREST_BY_DOCETAXEL_2_DN    | 1  | 15   | 16238 | 42   | 25.79841 | 0.038085 |
| lightgreen  | 6335 YAO_HOXA10_TARGETS_VIA_PROGESTERONE_DN        | 1  | 15   | 16238 | 42   | 25.79841 | 0.038085 |
| lightgreen  | 7179 LU_TUMOR_ENDOTHELIAL_MARKERS_UP               | 1  | 15   | 16238 | 42   | 25.79841 | 0.038085 |
| lightgreen  | 7548 WANG_RECURRENT_LIVER_CANCER_DN                | 1  | 15   | 16238 | 42   | 25.79841 | 0.038085 |
| purple      | 1165 ORGANIC_ANION_TRANSMEMBRANE_TRANSPORTER_1     | 1  | 4    | 16249 | 157  | 25.88057 | 0.038086 |
| purple      | 5458 NAKAMURA_ALVEOLAR_EPITHELIUM                  | 1  | 4    | 16249 | 157  | 25.88057 | 0.038086 |
| purple      | 6817 MCCOLLUM_GELDANAMYCIN_RESISTANCE_DN           | 1  | 4    | 16249 | 157  | 25.88057 | 0.038086 |
| purple      | 6967 WALLACE_PROSTATE_CANCER_DN                    | 1  | 4    | 16249 | 157  | 25.88057 | 0.038086 |
| purple      | 7721 MIKKELSEN_NPC_ICP_WITH_H3K27ME3               | 1  | 4    | 16249 | 157  | 25.88057 | 0.038086 |

|             |                                                    |     |      |       |      |          |          |
|-------------|----------------------------------------------------|-----|------|-------|------|----------|----------|
| purple      | 8063 PARK_OSTEOBLAST_DIFFERENTIATION_BY_PHENYLAMI  | 1   | 4    | 16249 | 157  | 25.88057 | 0.038086 |
| green       | 6312 ABBUD_LIF_SIGNALING_1_UP                      | 7   | 40   | 16213 | 1305 | 2.179521 | 0.03809  |
| blue        | 5985 LEE_TARGETS_OF_PTCH1_AND_SUFU_UP              | 14  | 47   | 16206 | 2978 | 1.625695 | 0.038094 |
| magenta     | 3701 MODULE_223                                    | 4   | 123  | 16130 | 167  | 3.164987 | 0.038097 |
| magenta     | 8329 IL21_UP.V1_DN                                 | 4   | 123  | 16130 | 167  | 3.164987 | 0.038097 |
| magenta     | 9189 GSE17974_IL4_AND_ANTI_IL12_VS_UNTREATED_1H_A  | 4   | 123  | 16130 | 167  | 3.164987 | 0.038097 |
| tan         | 1651 V\$TCF11_01                                   | 5   | 207  | 16046 | 145  | 2.70748  | 0.038101 |
| blue        | 10090 GSE3982_CENT_MEMORY_CD4_TCELL_VS_NKCELL_UP   | 42  | 176  | 16077 | 2978 | 1.302403 | 0.038141 |
| turquoise   | 1547 V\$TST1_01                                    | 60  | 190  | 16063 | 4169 | 1.231117 | 0.038144 |
| turquoise   | 8904 GSE17721_CTRL_VS_GARDIQUIMOD_6H_BMDM_UP       | 60  | 190  | 16063 | 4169 | 1.231117 | 0.038144 |
| turquoise   | 9125 GSE17721_12H_VS_24H_PAM3CSK4_BMDM_DN          | 60  | 190  | 16063 | 4169 | 1.231117 | 0.038144 |
| red         | 7689 DANG_REGULATED_BY_MYC_DN                      | 13  | 232  | 16021 | 524  | 1.738031 | 0.038151 |
| turquoise   | 1020 UBIQUITIN_CYCLE                               | 18  | 47   | 16206 | 4169 | 1.493057 | 0.038159 |
| turquoise   | 2092 GGCACAT,MIR-455                               | 18  | 47   | 16206 | 4169 | 1.493057 | 0.038159 |
| turquoise   | 3250 chr6q21                                       | 18  | 47   | 16206 | 4169 | 1.493057 | 0.038159 |
| turquoise   | 6120 KENNY_CTNNB1_TARGETS_DN                       | 18  | 47   | 16206 | 4169 | 1.493057 | 0.038159 |
| greenyello  | 4262 REACTOME_GASTRIN_CREB_SIGNALLING_PATHWAY_V    | 4   | 137  | 16116 | 150  | 3.163601 | 0.038165 |
| pink        | 6439 ZHOU_TNF_SIGNALING_4HR                        | 3   | 53   | 16200 | 228  | 4.035005 | 0.038209 |
| brown       | 8629 GSE14308_TH2_VS_TH1_DN                        | 34  | 186  | 16067 | 2190 | 1.356611 | 0.038213 |
| brown       | 10001 GSE3982_MAST_CELL_VS_BASOPHIL_DN             | 34  | 186  | 16067 | 2190 | 1.356611 | 0.038213 |
| turquoise   | 6200 PENG_GLUCCOSE_DEPRIVATION_DN                  | 50  | 155  | 16098 | 4169 | 1.257593 | 0.03822  |
| brown       | 3383 chr20q13                                      | 28  | 148  | 16105 | 2190 | 1.40406  | 0.038238 |
| purple      | 2805 KEGG_CALCIUM_SIGNALING_PATHWAY                | 4   | 131  | 16122 | 157  | 3.160986 | 0.038258 |
| purple      | 8270 PRC2_SUZ12_UP.V1_UP                           | 4   | 131  | 16122 | 157  | 3.160986 | 0.038258 |
| turquoise   | 8812 GSE15930_STIM_VS_STIM_AND_TRICHOSTATINA_72H   | 58  | 183  | 16070 | 4169 | 1.235602 | 0.03827  |
| turquoise   | 9139 GSE17721_0.5H_VS_12H_GARDIQUIMOD_BMDM_DN      | 58  | 183  | 16070 | 4169 | 1.235602 | 0.03827  |
| turquoise   | 9587 GSE27786_CD4_TCELL_VS_MONO_MAC_DN             | 58  | 183  | 16070 | 4169 | 1.235602 | 0.03827  |
| turquoise   | 9866 GSE360_L_DONOVANI_VS_B_MALAYI_LOW_DOSE_MA     | 58  | 183  | 16070 | 4169 | 1.235602 | 0.03827  |
| turquoise   | 5746 PUJANA_BRCA_CENTERED_NETWORK                  | 39  | 117  | 16136 | 4169 | 1.299512 | 0.038278 |
| pink        | 87 CYTOSKELETON                                    | 9   | 322  | 15931 | 228  | 1.99244  | 0.038299 |
| midnightb   | 9039 GSE17721_LPS_VS_CPG_0.5H_BMDM_DN              | 3   | 170  | 16083 | 71   | 4.039685 | 0.038304 |
| green       | 1204 SUBSTRATE_SPECIFIC_CHANNEL_ACTIVITY           | 14  | 104  | 16149 | 1305 | 1.676555 | 0.038334 |
| green       | 7438 MEISSNER_NPC_HCP_WITH_H3K4ME3_AND_H3K27ME     | 14  | 104  | 16149 | 1305 | 1.676555 | 0.038334 |
| green       | 9240 GSE18791_UNSTIM_VS_NEWCATSLE_VIRUS_DC_2H_UI   | 14  | 104  | 16149 | 1305 | 1.676555 | 0.038334 |
| magenta     | 1470 V\$RSRFC4_01                                  | 5   | 180  | 16073 | 167  | 2.703426 | 0.038335 |
| magenta     | 1589 V\$CEBP_Q2                                    | 5   | 180  | 16073 | 167  | 2.703426 | 0.038335 |
| brown       | 6864 MARSON_BOUND_BY_FOXP3_UNSTIMULATED            | 177 | 1161 | 15092 | 2190 | 1.131437 | 0.03834  |
| salmon      | 2455 MORF_RAB5A                                    | 3   | 95   | 16158 | 127  | 4.041359 | 0.038363 |
| pink        | 3625 MODULE_137                                    | 11  | 426  | 15827 | 228  | 1.840695 | 0.038363 |
| turquoise   | 8443 GSE10856_CTRL_VS_TNFRSF6B_IN_MACROPHAGE_DN    | 54  | 169  | 16084 | 4169 | 1.245686 | 0.038371 |
| turquoise   | 8966 GSE17721_CPG_VS_GARDIQUIMOD_0.5H_BMDM_UP      | 54  | 169  | 16084 | 4169 | 1.245686 | 0.038371 |
| turquoise   | 10092 GSE3982_CENT_MEMORY_CD4_TCELL_VS_TH1_UP      | 54  | 169  | 16084 | 4169 | 1.245686 | 0.038371 |
| brown       | 1208 SMALL_GTPASE_REGULATOR_ACTIVITY               | 14  | 63   | 16190 | 2190 | 1.649214 | 0.038373 |
| brown       | 3455 SIG_PIP3_SIGNALING_IN_CARDIAC_MYOCYTES        | 14  | 63   | 16190 | 2190 | 1.649214 | 0.038373 |
| lightcyan   | 8561 GSE13411_PLASMA_CELL_VS_MEMORY_BCELL_DN       | 3   | 195  | 16058 | 62   | 4.033002 | 0.038381 |
| lightcyan   | 9895 GSE36392_TYPE_2_MYELOID_VS_NEUTROPHIL_IL25_TI | 3   | 195  | 16058 | 62   | 4.033002 | 0.038381 |
| tan         | 5335 DARWICHE_PAPILLOMA_RISK_LOW_DN                | 4   | 142  | 16111 | 145  | 3.157455 | 0.038397 |
| lightgreen  | 3750 MODULE_292                                    | 2   | 120  | 16133 | 42   | 6.449603 | 0.038418 |
| lightyellow | 522 ORGANIC_ACID_METABOLIC_PROCESS                 | 2   | 153  | 16100 | 33   | 6.438107 | 0.038425 |
| lightyellow | 5312 MCBRYAN_PUBERTAL_TGFB1_TARGETS_UP             | 2   | 153  | 16100 | 33   | 6.438107 | 0.038425 |
| lightyellow | 9002 GSE17721_POLYIC_VS_CPG_0.5H_BMDM_UP           | 2   | 153  | 16100 | 33   | 6.438107 | 0.038425 |
| pink        | 3800 MODULE_356                                    | 5   | 132  | 16121 | 228  | 2.700193 | 0.038435 |
| pink        | 5780 GROSS_HYPOXIA_VIA_ELK3_AND_HIF1A_UP           | 5   | 132  | 16121 | 228  | 2.700193 | 0.038435 |
| brown       | 3105 BIOCARTA_PAR1_PATHWAY                         | 9   | 35   | 16218 | 2190 | 1.908376 | 0.038445 |
| brown       | 4158 REACTOME_BMAL1_CLOCK_NPAS2_ACTIVATES_CIRCAI   | 9   | 35   | 16218 | 2190 | 1.908376 | 0.038445 |
| brown       | 6106 DORSAM_HOXA9_TARGETS_UP                       | 9   | 35   | 16218 | 2190 | 1.908376 | 0.038445 |
| brown       | 7900 SUBTIL_PROGESTIN_TARGETS                      | 9   | 35   | 16218 | 2190 | 1.908376 | 0.038445 |
| blue        | 7823 WHITFIELD_CELL_CYCLE_G2_M                     | 48  | 205  | 16048 | 2978 | 1.277898 | 0.038459 |
| greenyello  | 3563 MODULE_75                                     | 7   | 340  | 15913 | 150  | 2.230804 | 0.038467 |
| salmon      | 4778 REACTOME_APOBEC3G_MEDIATED_RESISTANCE_TO_H    | 1   | 5    | 16248 | 127  | 25.59528 | 0.038469 |

|             |                                                   |    |     |       |      |          |          |
|-------------|---------------------------------------------------|----|-----|-------|------|----------|----------|
| salmon      | 5480 MYLLYKANGAS_AMPLIFICATION_HOT_SPOT_30        | 1  | 5   | 16248 | 127  | 25.59528 | 0.038469 |
| yellow      | 2581 GNF2_CENPF                                   | 10 | 61  | 16192 | 1426 | 1.868462 | 0.038473 |
| yellow      | 5006 GARGALOVIC_RESPONSE_TO_OXIDIZED_PHOSPHOLIPID | 10 | 61  | 16192 | 1426 | 1.868462 | 0.038473 |
| black       | 4737 REACTOME_COMPLEMENT_CASCADE                  | 2  | 18  | 16235 | 283  | 6.381233 | 0.038476 |
| black       | 6511 SU_THYMUS                                    | 2  | 18  | 16235 | 283  | 6.381233 | 0.038476 |
| green       | 6723 ZAMORA_NOS2_TARGETS_DN                       | 12 | 85  | 16168 | 1305 | 1.758269 | 0.038479 |
| green       | 7872 HOELZEL_NF1_TARGETS_DN                       | 12 | 85  | 16168 | 1305 | 1.758269 | 0.038479 |
| cyan        | 997 RESPONSE_TO_DNA_DAMAGE_STIMULUS               | 3  | 157 | 16096 | 77   | 4.033336 | 0.038493 |
| purple      | 863 POSITIVE_REGULATION_OF_TRANSFERASE_ACTIVITY   | 3  | 77  | 16176 | 157  | 4.033336 | 0.038493 |
| purple      | 5249 GAUSSMANN_MLL_AF4_FUSION_TARGETS_E_UP        | 3  | 77  | 16176 | 157  | 4.033336 | 0.038493 |
| brown       | 2879 KEGG_PATHWAYS_IN_CANCER                      | 50 | 290 | 15963 | 2190 | 1.279562 | 0.038494 |
| blue        | 3418 chr16p11                                     | 23 | 87  | 16166 | 2978 | 1.442838 | 0.038545 |
| yellow      | 2484 GCM_ATM                                      | 5  | 22  | 16231 | 1426 | 2.590367 | 0.038547 |
| yellow      | 3644 MODULE_159                                   | 12 | 78  | 16175 | 1426 | 1.753479 | 0.038565 |
| turquoise   | 279 LYSOSOME_ORGANIZATION_AND_BIOGENESIS          | 6  | 11  | 16242 | 4169 | 2.126475 | 0.038639 |
| turquoise   | 351 GLYCOPROTEIN_CATABOLIC_PROCESS                | 6  | 11  | 16242 | 4169 | 2.126475 | 0.038639 |
| turquoise   | 620 VACUOLE_ORGANIZATION_AND_BIOGENESIS           | 6  | 11  | 16242 | 4169 | 2.126475 | 0.038639 |
| turquoise   | 1293 CYCLIC_NUCLEOTIDE_PHOSPHODIESTERASE_ACTIVITY | 6  | 11  | 16242 | 4169 | 2.126475 | 0.038639 |
| turquoise   | 3132 chr6q13                                      | 6  | 11  | 16242 | 4169 | 2.126475 | 0.038639 |
| turquoise   | 3342 chr21q11                                     | 6  | 11  | 16242 | 4169 | 2.126475 | 0.038639 |
| turquoise   | 4451 REACTOME_P2Y_RECEPTORS                       | 6  | 11  | 16242 | 4169 | 2.126475 | 0.038639 |
| turquoise   | 4525 REACTOME_ZINC_TRANSPORTERS                   | 6  | 11  | 16242 | 4169 | 2.126475 | 0.038639 |
| turquoise   | 5004 GARGALOVIC_RESPONSE_TO_OXIDIZED_PHOSPHOLIPID | 6  | 11  | 16242 | 4169 | 2.126475 | 0.038639 |
| turquoise   | 6020 STEGMEIER_PRE-MITOTIC_CELL_CYCLE_REGULATORS  | 6  | 11  | 16242 | 4169 | 2.126475 | 0.038639 |
| midnightb   | 4939 WANG_RESPONSE_TO_FORSKOLIN_DN                | 1  | 9   | 16244 | 71   | 25.43505 | 0.038645 |
| red         | 8111 PHONG_TNF_TARGETS_UP                         | 5  | 58  | 16195 | 524  | 2.673894 | 0.038658 |
| turquoise   | 737 GLYCOPROTEIN_BIOSYNTHETIC_PROCESS             | 22 | 60  | 16193 | 4169 | 1.429464 | 0.03869  |
| turquoise   | 2070 CTCAAGA,MIR-526B                             | 22 | 60  | 16193 | 4169 | 1.429464 | 0.03869  |
| brown       | 2872 KEGG_AMYOTROPHIC_LATERAL_SCLEROSIS_ALS       | 11 | 46  | 16207 | 2190 | 1.774697 | 0.038696 |
| brown       | 6676 BRACHAT_RESPONSE_TO_CAMPTOTHECIN_DN          | 11 | 46  | 16207 | 2190 | 1.774697 | 0.038696 |
| brown       | 9167 GSE17974_0H_VS_72H_IN_VITRO_ACT_CD4_TCELL_DN | 36 | 199 | 16054 | 2190 | 1.342576 | 0.038702 |
| brown       | 9909 GSE36476_CTRL_VS_TSST_ACT_16H_MEMORY_CD4_T   | 36 | 199 | 16054 | 2190 | 1.342576 | 0.038702 |
| blue        | 1239 RNA_BINDING                                  | 56 | 244 | 16009 | 2978 | 1.252585 | 0.03871  |
| red         | 6359 YAGI_AML_SURVIVAL                            | 8  | 119 | 16134 | 524  | 2.085188 | 0.038713 |
| purple      | 8662 GSE1432_CTRL_VS_IFNG_24H_MICROGLIA_UP        | 5  | 192 | 16061 | 157  | 2.695893 | 0.038716 |
| greenyello  | 1936 V\$AR_Q6                                     | 5  | 201 | 16052 | 150  | 2.695357 | 0.038734 |
| brown       | 5083 TIEN_INTESTINE_PROBIOTICS_24HR_UP            | 88 | 545 | 15708 | 2190 | 1.198328 | 0.038736 |
| yellow      | 6865 MARSON_BOUND_BY_E2F4_UNSTIMULATED            | 75 | 699 | 15554 | 1426 | 1.22292  | 0.038737 |
| blue        | 8520 GSE12845_NAIVE_VS_DARKZONE_GC_TONSIL_BCELL_U | 43 | 181 | 16072 | 2978 | 1.296578 | 0.038784 |
| yellow      | 8469 GSE11864_CSF1_VS_CSF1_IFNG_IN_MAC_DN         | 23 | 178 | 16075 | 1426 | 1.472726 | 0.038797 |
| yellow      | 8951 GSE17721_PAM3CSK4_VS_CPG_1H_BMDM_DN          | 23 | 178 | 16075 | 1426 | 1.472726 | 0.038797 |
| tan         | 4591 REACTOME_RNA_POL_I_PROMOTER_OPENING          | 2  | 35  | 16218 | 145  | 6.405123 | 0.038818 |
| pink        | 9074 GSE17721_LPS_VS_GARDIQUIMOD_0.5H_BMDM_UP     | 6  | 177 | 16076 | 228  | 2.416444 | 0.038838 |
| pink        | 9098 GSE17721_0.5H_VS_24H_LPS_BMDM_UP             | 6  | 177 | 16076 | 228  | 2.416444 | 0.038838 |
| midnightb   | 8465 GSE11864_UNTREATED_VS_CSF1_PAM3CYS_IN_MAC_U  | 3  | 171 | 16082 | 71   | 4.016061 | 0.03887  |
| midnightb   | 9078 GSE17721_LPS_VS_GARDIQUIMOD_2H_BMDM_UP       | 3  | 171 | 16082 | 71   | 4.016061 | 0.03887  |
| midnightb   | 9713 GSE30083_SP1_VS_SP3_THYMOCYTE_DN             | 3  | 171 | 16082 | 71   | 4.016061 | 0.03887  |
| midnightb   | 9852 GSE360_T_GONDII_VS_M_TUBERCULOSIS_DC_UP      | 3  | 171 | 16082 | 71   | 4.016061 | 0.03887  |
| midnightb   | 9912 GSE36476_CTRL_VS_TSST_ACT_72H_MEMORY_CD4_T   | 3  | 171 | 16082 | 71   | 4.016061 | 0.03887  |
| lightcyan   | 8480 GSE11924_TFH_VS_TH1_CD4_TCELL_UP             | 3  | 196 | 16057 | 62   | 4.012426 | 0.038875 |
| lightcyan   | 8870 GSE17721_CTRL_VS_PAM3CSK4_4H_BMDM_UP         | 3  | 196 | 16057 | 62   | 4.012426 | 0.038875 |
| lightcyan   | 9942 GSE37416_0H_VS_48H_F_TULARENSIS_LVS_NEUTROPI | 3  | 196 | 16057 | 62   | 4.012426 | 0.038875 |
| lightcyan   | 9946 GSE37416_12H_VS_48H_F_TULARENSIS_LVS_NEUTROI | 3  | 196 | 16057 | 62   | 4.012426 | 0.038875 |
| lightyellow | 8750 GSE15659_NAIVE_CD4_TCELL_VS_ACTIVATED_TREG_U | 2  | 154 | 16099 | 33   | 6.396301 | 0.038881 |
| green       | 9524 GSE2706_2H_VS_8H_LPS_STIM_DC_UP              | 22 | 184 | 16069 | 1305 | 1.489114 | 0.038885 |
| red         | 2064 ATATGCA,MIR-448                              | 11 | 186 | 16067 | 524  | 1.834349 | 0.038891 |
| red         | 8429 GSE10325_LUPUS_CD4_TCELL_VS_LUPUS_BCELL_DN   | 11 | 186 | 16067 | 524  | 1.834349 | 0.038891 |
| red         | 8629 GSE14308_TH2_VS_TH1_DN                       | 11 | 186 | 16067 | 524  | 1.834349 | 0.038891 |
| red         | 9027 GSE17721_PAM3CSK4_VS_GADIQUIMOD_4H_BMDM_U    | 11 | 186 | 16067 | 524  | 1.834349 | 0.038891 |
| red         | 9409 GSE24142_EARLY_THYMIC_PROGENITOR_VS_DN2_THY  | 11 | 186 | 16067 | 524  | 1.834349 | 0.038891 |

|             |                                                    |     |      |       |      |          |          |
|-------------|----------------------------------------------------|-----|------|-------|------|----------|----------|
| red         | 9778 GSE339_CD8POS_VS_CD4CD8DN_DC_IN_CULTURE_UP    | 11  | 186  | 16067 | 524  | 1.834349 | 0.038891 |
| red         | 9811 GSE360_CTRL_VS_B_MALAYI_HIGH_DOSE_MAC_DN      | 11  | 186  | 16067 | 524  | 1.834349 | 0.038891 |
| blue        | 1464 V\$SP1_01                                     | 49  | 210  | 16043 | 2978 | 1.273461 | 0.038923 |
| yellow      | 8618 GSE14000_UNSTIM_VS_4H_LPS_DC_UP               | 25  | 197  | 16056 | 1426 | 1.446398 | 0.038951 |
| yellow      | 9161 GSE17974_0H_VS_12H_IN_VITRO_ACT_CD4_TCELL_DN  | 25  | 197  | 16056 | 1426 | 1.446398 | 0.038951 |
| salmon      | 1406 UNFOLDED_PROTEIN_BINDING                      | 2   | 40   | 16213 | 127  | 6.398819 | 0.038953 |
| blue        | 2393 MORF_FOSL1                                    | 70  | 313  | 15940 | 2978 | 1.22057  | 0.038959 |
| purple      | 5175 ENK_UV_RESPONSE KERATINOCYTE_UP               | 9   | 470  | 15783 | 157  | 1.982342 | 0.038959 |
| purple      | 7934 BRUINS_UVC_RESPONSE_VIA_TP53_GROUP_B          | 9   | 470  | 15783 | 157  | 1.982342 | 0.038959 |
| green       | 631 AMINE_CATABOLIC_PROCESS                        | 5   | 24   | 16229 | 1305 | 2.594668 | 0.038979 |
| green       | 5720 LIEN_BREAST_CARCINOMA_METAPLASTIC             | 5   | 24   | 16229 | 1305 | 2.594668 | 0.038979 |
| green       | 6563 BANDRES_RESPONSE_TO_CARMUSTIN_MGMT_24HR_I     | 5   | 24   | 16229 | 1305 | 2.594668 | 0.038979 |
| green       | 6899 GAZIN_EPIGENETIC_SILENCING_BY_KRAS            | 5   | 24   | 16229 | 1305 | 2.594668 | 0.038979 |
| greenyello  | 3748 MODULE_289                                    | 3   | 81   | 16172 | 150  | 4.013086 | 0.038999 |
| red         | 2730 KEGG_PURINE_METABOLISM                        | 9   | 141  | 16112 | 524  | 1.97982  | 0.03903  |
| red         | 4858 CHEMNITZ_RESPONSE_TO_PROSTAGLANDIN_E2_UP      | 9   | 141  | 16112 | 524  | 1.97982  | 0.03903  |
| red         | 9892 GSE36392_TYPE_2_MYELOID_VS_MAC_IL25_TREATED_  | 9   | 141  | 16112 | 524  | 1.97982  | 0.03903  |
| greenyello  | 7853 KIM_ALL_DISORDERS_DURATION_CORR_DN            | 4   | 138  | 16115 | 150  | 3.140676 | 0.039033 |
| brown       | 740 SECRETION                                      | 27  | 142  | 16111 | 2190 | 1.411123 | 0.039042 |
| brown       | 9352 GSE22886_NEUTROPHIL_VS_DC_UP                  | 27  | 142  | 16111 | 2190 | 1.411123 | 0.039042 |
| magenta     | 8106 FORTSCHEGGER_PHF8_TARGETS_UP                  | 6   | 242  | 16011 | 167  | 2.412976 | 0.039048 |
| magenta     | 9386 GSE22886_IL2_VS_IL15_STIM_NKCELL_UP           | 4   | 124  | 16129 | 167  | 3.139463 | 0.039064 |
| lightyellow | 2131 RNGTGGGC_UNKNOWN                              | 4   | 638  | 15615 | 33   | 3.087869 | 0.039083 |
| pink        | 7848 KIM_BIPOLAR_DISORDER_OLIGODENDROCYTE_DENSIT   | 15  | 646  | 15607 | 228  | 1.655226 | 0.039088 |
| cyan        | 6038 ONDER_CDH1_SIGNALING_VIA_CTNNB1               | 2   | 66   | 16187 | 77   | 6.396301 | 0.0391   |
| cyan        | 7430 SHAFFER_IRF4_TARGETS_IN_PLASMA_CELL_VS_MATUI  | 2   | 66   | 16187 | 77   | 6.396301 | 0.0391   |
| red         | 8029 IKEDA_MIR133_TARGETS_UP                       | 4   | 40   | 16213 | 524  | 3.101718 | 0.039104 |
| red         | 8164 LIM_MAMMARY_LUMINAL_PROGENITOR_UP             | 4   | 40   | 16213 | 524  | 3.101718 | 0.039104 |
| magenta     | 8520 GSE12845_NAIVE_VS_DARKZONE_GC_TONSIL_BCELL_U  | 5   | 181  | 16072 | 167  | 2.68849  | 0.03911  |
| magenta     | 9456 GSE24634_IL4_VS_CTRL_TREATED_NAIVE_CD4_TCELL_ | 5   | 181  | 16072 | 167  | 2.68849  | 0.03911  |
| lightcyan   | 929 CATION_HOMEOSTASIS                             | 2   | 82   | 16171 | 62   | 6.393784 | 0.039123 |
| purple      | 6537 BLALOCK_ALZHEIMERS_DISEASE_UP                 | 22  | 1535 | 14718 | 157  | 1.483707 | 0.039145 |
| greenyello  | 1074 G_PROTEIN_COUPLED_RECEPTOR_BINDING            | 2   | 34   | 16219 | 150  | 6.373725 | 0.039149 |
| greenyello  | 3932 PID_ERBB4_PATHWAY                             | 2   | 34   | 16219 | 150  | 6.373725 | 0.039149 |
| greenyello  | 5509 MATTIOLI_MULTIPLE_MYELOMA_WITH_14Q32_TRANS    | 2   | 34   | 16219 | 150  | 6.373725 | 0.039149 |
| greenyello  | 5964 SHIN_B_CELL_LYMPHOMA_CLUSTER_8                | 2   | 34   | 16219 | 150  | 6.373725 | 0.039149 |
| black       | 8290 ESC_V6.5_UP_EARLY.V1_UP                       | 6   | 143  | 16110 | 283  | 2.409696 | 0.039178 |
| brown       | 6077 CHESLER_BRAIN_QTL_CIS                         | 15  | 69   | 16184 | 2190 | 1.613361 | 0.039198 |
| brown       | 8981 GSE17721_CPG_VS_GARDIQUIMOD_16H_BMDM_DN       | 33  | 180  | 16073 | 2190 | 1.360601 | 0.039223 |
| turquoise   | 4801 PARENT_MTOR_SIGNALING_UP                      | 154 | 530  | 15723 | 4169 | 1.132782 | 0.039231 |
| tan         | 599 RIBONUCLEOPROTEIN_COMPLEX_BIOGENESIS_AND_AS    | 3   | 84   | 16169 | 145  | 4.003202 | 0.039252 |
| magenta     | 6353 RADMACHER_AML_PROGNOSIS                       | 3   | 73   | 16180 | 167  | 3.99959  | 0.039284 |
| turquoise   | 3526 MODULE_37                                     | 122 | 413  | 15840 | 4169 | 1.151626 | 0.039295 |
| grey60      | 853 CHEMICAL_HOMEOSTASIS                           | 2   | 116  | 16137 | 44   | 6.36873  | 0.039325 |
| grey60      | 5187 CHIARADONNA_NEOPLASTIC_TRANSFORMATION_KRAS    | 2   | 116  | 16137 | 44   | 6.36873  | 0.039325 |
| red         | 149 APICAL_PART_OF_CELL                            | 2   | 10   | 16243 | 524  | 6.203435 | 0.03933  |
| red         | 304 HORMONE_SECRETION                              | 2   | 10   | 16243 | 524  | 6.203435 | 0.03933  |
| red         | 1084 HEMATOPOIETIN_INTERFERON_CLASSD200_DOMAIN_I   | 2   | 10   | 16243 | 524  | 6.203435 | 0.03933  |
| red         | 2838 KEGG_RENIN_ANGIOTENSIN_SYSTEM                 | 2   | 10   | 16243 | 524  | 6.203435 | 0.03933  |
| red         | 3077 BIOCARTA_RANMS_PATHWAY                        | 2   | 10   | 16243 | 524  | 6.203435 | 0.03933  |
| red         | 3323 chr4p13                                       | 2   | 10   | 16243 | 524  | 6.203435 | 0.03933  |
| red         | 4220 REACTOME_REGULATION_OF_COMPLEMENT_CASCADE     | 2   | 10   | 16243 | 524  | 6.203435 | 0.03933  |
| red         | 4257 REACTOME_CS_DS_DEGRADATION                    | 2   | 10   | 16243 | 524  | 6.203435 | 0.03933  |
| red         | 4332 REACTOME_REGULATED_PROTEOLYSIS_OF_P75NTR      | 2   | 10   | 16243 | 524  | 6.203435 | 0.03933  |
| red         | 4466 REACTOME_REGULATION_OF_INSULIN_SECRETION_BY   | 2   | 10   | 16243 | 524  | 6.203435 | 0.03933  |
| red         | 5577 TERAMOTO_OPN_TARGETS_CLUSTER_1                | 2   | 10   | 16243 | 524  | 6.203435 | 0.03933  |
| red         | 8143 HOLLEMAN_PREDNISOLONE_RESISTANCE_B_ALL_DN     | 2   | 10   | 16243 | 524  | 6.203435 | 0.03933  |
| red         | 8150 HOLLEMAN_PREDNISOLONE_RESISTANCE_ALL_UP       | 2   | 10   | 16243 | 524  | 6.203435 | 0.03933  |
| turquoise   | 2220 YGCGYRCGC_UNKNOWN                             | 88  | 290  | 15963 | 4169 | 1.183004 | 0.039332 |
| lightyellow | 5858 SCHAEFFER_PROSTATE_DEVELOPMENT_6HR_UP         | 2   | 155  | 16098 | 33   | 6.355034 | 0.039341 |

|             |                                                   |    |     |       |      |          |          |
|-------------|---------------------------------------------------|----|-----|-------|------|----------|----------|
| red         | 4951 HORIUCHI_WTAP_TARGETS_UP                     | 15 | 281 | 15972 | 524  | 1.655721 | 0.039358 |
| lightcyan   | 3367 chr11p15                                     | 3  | 197 | 16056 | 62   | 3.992058 | 0.039372 |
| lightcyan   | 9392 GSE22886_NAIVE_CD4_TCELL_VS_48H_ACT_TH1_UP   | 3  | 197 | 16056 | 62   | 3.992058 | 0.039372 |
| lightcyan   | 9443 GSE24634_TREG_VS_TCONV_POST_DAY5_IL4_CONVER  | 3  | 197 | 16056 | 62   | 3.992058 | 0.039372 |
| purple      | 6500 BROWNE_HCMV_INFECTION_14HR_DN                | 6  | 258 | 15995 | 157  | 2.407495 | 0.039383 |
| brown       | 9949 GSE3982_CTRL_VS_PMA_STIM_EOSINOPHIL_DN       | 30 | 161 | 16092 | 2190 | 1.382881 | 0.039383 |
| blue        | 8999 GSE17721_LPS_VS_PAM3CSK4_16H_BMDM_DN         | 44 | 186 | 16067 | 2978 | 1.291066 | 0.039392 |
| blue        | 9166 GSE17974_0H_VS_72H_IN_VITRO_ACT_CD4_TCELL_UP | 44 | 186 | 16067 | 2978 | 1.291066 | 0.039392 |
| greenyello  | 1720 V\$IRF7_01                                   | 5  | 202 | 16051 | 150  | 2.682013 | 0.039433 |
| yellow      | 396 TRANSLATIONAL_INITIATION                      | 7  | 37  | 16216 | 1426 | 2.156306 | 0.039439 |
| yellow      | 2115 ACAACCT,MIR-453                              | 7  | 37  | 16216 | 1426 | 2.156306 | 0.039439 |
| yellow      | 2554 GCM_SMARCC1                                  | 7  | 37  | 16216 | 1426 | 2.156306 | 0.039439 |
| yellow      | 5989 NIKOLSKY_BREAST_CANCER_1Q21_AMPLICON         | 7  | 37  | 16216 | 1426 | 2.156306 | 0.039439 |
| yellow      | 6520 KEEN_RESPONSE_TO_ROSIGLITAZONE_UP            | 7  | 37  | 16216 | 1426 | 2.156306 | 0.039439 |
| midnightb   | 9152 GSE17974_0H_VS_1H_IN_VITRO_ACT_CD4_TCELL_UP  | 3  | 172 | 16081 | 71   | 3.992712 | 0.039439 |
| turquoise   | 2417 MORF_MAP2K2                                  | 43 | 131 | 16122 | 4169 | 1.279672 | 0.039446 |
| purple      | 8411 GSE10239_NAIVE_VS_KLRG1HIGH_EFF_CD8_TCELL_DN | 5  | 193 | 16060 | 157  | 2.681925 | 0.039448 |
| brown       | 2502 GCM_CALM1                                    | 21 | 105 | 16148 | 2190 | 1.484292 | 0.039463 |
| turquoise   | 4535 REACTOME_METABOLISM_OF_MRNA                  | 65 | 208 | 16045 | 4169 | 1.218293 | 0.039464 |
| green       | 4643 REACTOME_IRON_UPTAKE_AND_TRANSPORT           | 6  | 32  | 16221 | 1305 | 2.335201 | 0.039471 |
| yellow      | 301 REGULATION_OF_KINASE_ACTIVITY                 | 19 | 141 | 16112 | 1426 | 1.535849 | 0.039472 |
| lightgreen  | 658 MEMBRANE_ORGANIZATION_AND_BIOGENESIS          | 2  | 122 | 16131 | 42   | 6.343872 | 0.039587 |
| lightyellow | 6033 ONDER_CDH1_TARGETS_2_DN                      | 3  | 374 | 15879 | 33   | 3.950656 | 0.039633 |
| green       | 6725 BANDRES_RESPONSE_TO_CARMUSTIN_MGMT_48HR_I    | 16 | 124 | 16129 | 1305 | 1.60702  | 0.039656 |
| yellow      | 2435 MORF_PPP1CA                                  | 22 | 169 | 16084 | 1426 | 1.483713 | 0.039671 |
| yellow      | 8531 GSE13306_LAMINA_PROPRIA_VS_SPLEEN_TREG_DN    | 22 | 169 | 16084 | 1426 | 1.483713 | 0.039671 |
| blue        | 5849 RICKMAN_TUMOR_DIFFERENTIATED_WELL_VS_MODEI   | 26 | 101 | 16152 | 2978 | 1.40495  | 0.039678 |
| cyan        | 8346 STK33_NOMO_UP                                | 4  | 271 | 15982 | 77   | 3.115541 | 0.039702 |
| brown       | 1993 GGCCAGT,MIR-193A,MIR-193B                    | 16 | 75  | 16178 | 2190 | 1.583245 | 0.039725 |
| brown       | 4581 REACTOME_L1CAM_INTERACTIONS                  | 16 | 75  | 16178 | 2190 | 1.583245 | 0.039725 |
| brown       | 4902 PUIFFE_INVASION_INHIBITED_BY_ASCITES_UP      | 16 | 75  | 16178 | 2190 | 1.583245 | 0.039725 |
| brown       | 6156 LIN_APC_TARGETS                              | 16 | 75  | 16178 | 2190 | 1.583245 | 0.039725 |
| brown       | 7739 YAO_TEMPORAL_RESPONSE_TO_PROGESTERONE_CLU!   | 16 | 75  | 16178 | 2190 | 1.583245 | 0.039725 |
| turquoise   | 196 MICROBODY                                     | 17 | 44  | 16209 | 4169 | 1.506253 | 0.039731 |
| turquoise   | 228 PEROXISOME                                    | 17 | 44  | 16209 | 4169 | 1.506253 | 0.039731 |
| turquoise   | 1432 TRANSFERASE_ACTIVITY_TRANSFERRING_GROUPS_OTF | 17 | 44  | 16209 | 4169 | 1.506253 | 0.039731 |
| black       | 5905 BENPORATH_SUZ12_TARGETS                      | 17 | 612 | 15641 | 283  | 1.595308 | 0.039732 |
| turquoise   | 5164 COLDREN_GEFITINIB_RESISTANCE_DN              | 63 | 201 | 16052 | 4169 | 1.221929 | 0.039732 |
| turquoise   | 2011 GTTNYNNGGTNA_UNKNOWN                         | 28 | 80  | 16173 | 4169 | 1.364488 | 0.039735 |
| turquoise   | 2044 KMCATNNWGGA_UNKNOWN                          | 28 | 80  | 16173 | 4169 | 1.364488 | 0.039735 |
| yellow      | 5793 BUYTAERT_PHOTODYNAMIC_THERAPY_STRESS_DN      | 66 | 607 | 15646 | 1426 | 1.239279 | 0.039739 |
| pink        | 1891 V\$LEF1_Q2                                   | 6  | 178 | 16075 | 228  | 2.402868 | 0.039743 |
| pink        | 8195 E2F1_UP.V1_DN                                | 6  | 178 | 16075 | 228  | 2.402868 | 0.039743 |
| pink        | 9951 GSE3982_CTRL_VS_IGE_STIM_MAST_CELL_DN        | 6  | 178 | 16075 | 228  | 2.402868 | 0.039743 |
| purple      | 7373 HINATA_NFKB_TARGETS_KERATINOCYTE_UP          | 3  | 78  | 16175 | 157  | 3.981627 | 0.039758 |
| purple      | 8008 WINZEN_DEGRADED_VIA_KHSRP                    | 3  | 78  | 16175 | 157  | 3.981627 | 0.039758 |
| brown       | 617 POSITIVE_REGULATION_OF_DEVELOPMENTAL_PROCES   | 35 | 193 | 16060 | 2190 | 1.345861 | 0.039775 |
| brown       | 8256 CAMP_UP.V1_UP                                | 35 | 193 | 16060 | 2190 | 1.345861 | 0.039775 |
| brown       | 10095 GSE3982_CENT_MEMORY_CD4_TCELL_VS_TH2_DN     | 35 | 193 | 16060 | 2190 | 1.345861 | 0.039775 |
| brown       | 3890 MODULE_503                                   | 20 | 99  | 16154 | 2190 | 1.499285 | 0.039791 |
| lightyellow | 9272 GSE20366_CD103_POS_VS_NEG_TREG_KLRG1NEG_UP   | 2  | 156 | 16097 | 33   | 6.314297 | 0.039802 |
| brown       | 2165 CAGCAGG,MIR-370                              | 26 | 136 | 16117 | 2190 | 1.418809 | 0.039828 |
| turquoise   | 7177 PODAR_RESPONSE_TO_ADAPHOSTIN_UP              | 45 | 138 | 16115 | 4169 | 1.271262 | 0.039837 |
| lightyellow | 2781 KEGG_NITROGEN_METABOLISM                     | 1  | 20  | 16233 | 33   | 24.62576 | 0.039857 |
| lightyellow | 3753 MODULE_295                                   | 1  | 20  | 16233 | 33   | 24.62576 | 0.039857 |
| lightyellow | 3772 MODULE_320                                   | 1  | 20  | 16233 | 33   | 24.62576 | 0.039857 |
| lightyellow | 4400 REACTOME_STEROID_HORMONES                    | 1  | 20  | 16233 | 33   | 24.62576 | 0.039857 |
| lightyellow | 4424 REACTOME_PEROXISOMAL_LIPID_METABOLISM        | 1  | 20  | 16233 | 33   | 24.62576 | 0.039857 |
| lightyellow | 5052 TONKS_TARGETS_OF_RUNX1_RUNX1T1_FUSION_SUST.  | 1  | 20  | 16233 | 33   | 24.62576 | 0.039857 |
| lightyellow | 6250 VERNELL_RETINOBLASTOMA_PATHWAY_DN            | 1  | 20  | 16233 | 33   | 24.62576 | 0.039857 |

|             |       |                                                |    |     |       |      |          |          |
|-------------|-------|------------------------------------------------|----|-----|-------|------|----------|----------|
| lightyellow | 6576  | VERRECCHIA_RESPONSE_TO_TGFB1_C5                | 1  | 20  | 16233 | 33   | 24.62576 | 0.039857 |
| lightyellow | 6644  | GENTILE_UV_HIGH_DOSE_UP                        | 1  | 20  | 16233 | 33   | 24.62576 | 0.039857 |
| grey60      | 4654  | REACTOME_N_GLYCAN_ANTENNAE_ELONGATION_IN_      | 1  | 15  | 16238 | 44   | 24.62576 | 0.039864 |
| grey60      | 6803  | LI_CYTIDINE_ANALOG_PATHWAY                     | 1  | 15  | 16238 | 44   | 24.62576 | 0.039864 |
| grey60      | 6993  | DE_YY1_TARGETS_UP                              | 1  | 15  | 16238 | 44   | 24.62576 | 0.039864 |
| blue        | 2335  | MORF_STK17A                                    | 32 | 129 | 16124 | 2978 | 1.353846 | 0.039867 |
| lightcyan   | 8399  | GOLDRATH_NAIVE_VS_EFF_CD8_TCELL_DN             | 3  | 198 | 16055 | 62   | 3.971896 | 0.039872 |
| lightcyan   | 8474  | GSE11864_CSF1_IFNG_VS_CSF1_PAM3CYS_IN_MAC_U    | 3  | 198 | 16055 | 62   | 3.971896 | 0.039872 |
| red         | 7373  | HINATA_NFKB_TARGETS_KERATINOCYTE_UP            | 6  | 78  | 16175 | 524  | 2.385937 | 0.039873 |
| green       | 10182 | GSE7460_CTRL_VS_FOXP3_OVEREXPR_TCONV_UP        | 19 | 154 | 16099 | 1305 | 1.536583 | 0.039893 |
| red         | 2250  | GATAAGR_V\$GATA_C                              | 12 | 210 | 16043 | 524  | 1.77241  | 0.039903 |
| red         | 3611  | MODULE_123                                     | 12 | 210 | 16043 | 524  | 1.77241  | 0.039903 |
| greenyello  | 2274  | CCCNNGGAR_V\$OLF1_01                           | 6  | 271 | 15982 | 150  | 2.398967 | 0.03993  |
| greenyello  | 8346  | STK33_NOMO_UP                                  | 6  | 271 | 15982 | 150  | 2.398967 | 0.03993  |
| blue        | 1292  | SEQUENCE_SPECIFIC_DNA_BINDING                  | 13 | 43  | 16210 | 2978 | 1.649999 | 0.039936 |
| yellow      | 2275  | CGTSACG_V\$PAX3_B                              | 18 | 132 | 16121 | 1426 | 1.55422  | 0.039956 |
| turquoise   | 8408  | GSE10239_NAIVE_VS_KLRG1INT_EFF_CD8_TCELL_UP    | 61 | 194 | 16059 | 4169 | 1.225829 | 0.039966 |
| turquoise   | 8562  | GSE13484_UNSTIM_VS_3H_YF17D_VACCINE_STIM_PB    | 61 | 194 | 16059 | 4169 | 1.225829 | 0.039966 |
| blue        | 9303  | GSE2197_CPG_DNA_VS_UNTREATED_IN_DC_DN          | 45 | 191 | 16062 | 2978 | 1.285843 | 0.039966 |
| yellow      | 8850  | GSE17721_CTRL_VS_POLYIC_1H_BMDM_UP             | 24 | 188 | 16065 | 1426 | 1.455015 | 0.039968 |
| yellow      | 9733  | GSE31082_DN_VS_CD4_SP_THYMOCYTE_DN             | 24 | 188 | 16065 | 1426 | 1.455015 | 0.039968 |
| yellow      | 2460  | MORF_RAN                                       | 32 | 265 | 15988 | 1426 | 1.376316 | 0.040007 |
| brown       | 6244  | ZHANG_TARGETS_OF_EWSR1_FLI1_FUSION             | 17 | 81  | 16172 | 2190 | 1.557591 | 0.040008 |
| midnightb   | 8262  | RAF_UP.V1_UP                                   | 3  | 173 | 16080 | 71   | 3.969633 | 0.040013 |
| midnightb   | 9277  | GSE20366_CD103_POS_VS_CD103_KLRG1_DP_TREG_D    | 3  | 173 | 16080 | 71   | 3.969633 | 0.040013 |
| midnightb   | 9298  | GSE20715_0H_VS_48H_OZONE_TLR4_KO_LUNG_UP       | 3  | 173 | 16080 | 71   | 3.969633 | 0.040013 |
| yellow      | 3744  | MODULE_285                                     | 8  | 45  | 16208 | 1426 | 2.026243 | 0.040015 |
| blue        | 10138 | GSE6269_FLU_VS_STREP_PNEUMO_INF_PBMC_UP        | 40 | 167 | 16086 | 2978 | 1.307231 | 0.040034 |
| turquoise   | 754   | REGULATION_OF_CATALYTIC_ACTIVITY               | 72 | 233 | 16020 | 4169 | 1.204698 | 0.040035 |
| blue        | 4157  | REACTOME_TCA_CYCLE_AND_RESPIRATORY_ELECTROM    | 29 | 115 | 16138 | 2978 | 1.376287 | 0.040043 |
| pink        | 4037  | PID_ATF2_PATHWAY                               | 3  | 54  | 16199 | 228  | 3.960283 | 0.040051 |
| purple      | 5188  | CHIARADONNA_NEOPLASTIC_TRANSFORMATION_KRAS     | 4  | 133 | 16120 | 157  | 3.113452 | 0.04009  |
| purple      | 7060  | SMID_BREAST_CANCER_LUMINAL_B_UP                | 4  | 133 | 16120 | 157  | 3.113452 | 0.04009  |
| green       | 1177  | HYDROLASE_ACTIVITY_ACTING_ON_ESTER_BONDS       | 26 | 226 | 16027 | 1305 | 1.432808 | 0.040095 |
| greenyello  | 635   | IMMUNE_RESPONSE                                | 5  | 203 | 16050 | 150  | 2.668801 | 0.04014  |
| cyan        | 5173  | ENK_UV_RESPONSE_EPIDERMIS_UP                   | 4  | 272 | 15981 | 77   | 3.104087 | 0.040154 |
| green       | 3515  | MODULE_23                                      | 44 | 419 | 15834 | 1305 | 1.307861 | 0.040156 |
| turquoise   | 9032  | GSE17721_PAM3CSK4_VS_GADIQUIMOD_12H_BMDM       | 59 | 187 | 16066 | 4169 | 1.23002  | 0.040159 |
| turquoise   | 9144  | GSE17721_0.5H_VS_24H_GARDIQUIMOD_BMDM_UP       | 59 | 187 | 16066 | 4169 | 1.23002  | 0.040159 |
| blue        | 1528  | V\$CREB_02                                     | 52 | 225 | 16028 | 2978 | 1.261333 | 0.040162 |
| magenta     | 984   | REGULATION_OF_CYTOKINE_BIOSYNTHETIC_PROCESS    | 2  | 31  | 16222 | 167  | 6.278926 | 0.040168 |
| magenta     | 2687  | GNF2_PTX3                                      | 2  | 31  | 16222 | 167  | 6.278926 | 0.040168 |
| magenta     | 3307  | chr12p11                                       | 2  | 31  | 16222 | 167  | 6.278926 | 0.040168 |
| magenta     | 6748  | HAN_JNK_SINGALING_DN                           | 2  | 31  | 16222 | 167  | 6.278926 | 0.040168 |
| red         | 1710  | V\$IPF1_Q4                                     | 11 | 187 | 16066 | 524  | 1.82454  | 0.040178 |
| red         | 9522  | GSE2706_2H_VS_8H_R848_STIM_DC_UP               | 11 | 187 | 16066 | 524  | 1.82454  | 0.040178 |
| red         | 10111 | GSE39820_CTRL_VS_TGFBETA3_IL6_IL23A_CD4_TCELL_ | 11 | 187 | 16066 | 524  | 1.82454  | 0.040178 |
| cyan        | 3122  | chr16q24                                       | 2  | 67  | 16186 | 77   | 6.300833 | 0.040182 |
| cyan        | 3287  | chr15q22                                       | 2  | 67  | 16186 | 77   | 6.300833 | 0.040182 |
| brown       | 1968  | CTCAGGG,MIR-125B,MIR-125A                      | 52 | 304 | 15949 | 2190 | 1.26946  | 0.040182 |
| purple      | 8694  | GSE1460_DP_VS_CD4_THYMOCYTE_UP                 | 5  | 194 | 16059 | 157  | 2.6681   | 0.040189 |
| blue        | 2542  | GCM_PPP1CC                                     | 16 | 56  | 16197 | 2978 | 1.55934  | 0.040199 |
| blue        | 2586  | GNF2_FEN1                                      | 16 | 56  | 16197 | 2978 | 1.55934  | 0.040199 |
| blue        | 6326  | GALE_APL_WITH_FLT3_MUTATED_UP                  | 16 | 56  | 16197 | 2978 | 1.55934  | 0.040199 |
| lightyellow | 6820  | CREIGHTON_ENDOCRINE_THERAPY_RESISTANCE_3       | 4  | 644 | 15609 | 33   | 3.0591   | 0.040236 |
| brown       | 8950  | GSE17721_PAM3CSK4_VS_CPG_1H_BMDM_UP            | 32 | 174 | 16079 | 2190 | 1.364866 | 0.040246 |
| brown       | 9563  | GSE27786_BCELL_VS_CD4_TCELL_DN                 | 32 | 174 | 16079 | 2190 | 1.364866 | 0.040246 |
| purple      | 3347  | chr10p12                                       | 2  | 33  | 16220 | 157  | 6.274078 | 0.040265 |
| purple      | 6381  | GREENBAUM_E2A_TARGETS_UP                       | 2  | 33  | 16220 | 157  | 6.274078 | 0.040265 |
| purple      | 6526  | MURAKAMI_UV_RESPONSE_6HR_UP                    | 2  | 33  | 16220 | 157  | 6.274078 | 0.040265 |



|             |                                                     |    |     |       |      |          |          |
|-------------|-----------------------------------------------------|----|-----|-------|------|----------|----------|
| lightyellow | 8881 GSE17721_CTRL_VS_CPG_0.5H_BMDM_DN              | 2  | 157 | 16096 | 33   | 6.274078 | 0.040265 |
| turquoise   | 8990 GSE17721_LPS_VS_PAM3CSK4_4H_BMDM_UP            | 57 | 180 | 16073 | 4169 | 1.234537 | 0.040306 |
| turquoise   | 2425 MORF_NME2                                      | 49 | 152 | 16101 | 4169 | 1.256765 | 0.040308 |
| yellow      | 9189 GSE17974_IL4_AND_ANTI_IL12_VS_UNTREATED_1H_A   | 17 | 123 | 16130 | 1426 | 1.57528  | 0.04031  |
| green       | 3122 chr16q24                                       | 10 | 67  | 16186 | 1305 | 1.858867 | 0.040326 |
| green       | 6921 KONDO_EZH2_TARGETS                             | 23 | 195 | 16058 | 1305 | 1.468981 | 0.040339 |
| cyan        | 8218 AKT_UP_MTOR_DN.V1_UP                           | 3  | 160 | 16093 | 77   | 3.957711 | 0.040353 |
| red         | 1128 GTPASE_REGULATOR_ACTIVITY                      | 8  | 120 | 16133 | 524  | 2.067812 | 0.040363 |
| red         | 3326 chr21q22                                       | 8  | 120 | 16133 | 524  | 2.067812 | 0.040363 |
| black       | 9014 GSE17721_POLYIC_VS_CPG_12H_BMDM_UP             | 7  | 182 | 16071 | 283  | 2.208888 | 0.04037  |
| black       | 10223 GSE8868_SPLEEN_VS_INTESTINE_CD11B_POS_CD11C_I | 7  | 182 | 16071 | 283  | 2.208888 | 0.04037  |
| lightcyan   | 9324 GSE22886_CD8_TCELL_VS_BCELL_NAIVE_UP           | 3  | 199 | 16054 | 62   | 3.951937 | 0.040375 |
| lightcyan   | 9665 GSE29618_PDC_VS_MDC_DN                         | 3  | 199 | 16054 | 62   | 3.951937 | 0.040375 |
| red         | 38 EXTRACELLULAR_REGION                             | 15 | 282 | 15971 | 524  | 1.64985  | 0.040394 |
| green       | 33 SYNAPSE_PART                                     | 3  | 10  | 16243 | 1305 | 3.736322 | 0.040402 |
| green       | 760 VESICLE_LOCALIZATION                            | 3  | 10  | 16243 | 1305 | 3.736322 | 0.040402 |
| green       | 923 REGULATION_OF_NEURON_APOPTOSIS                  | 3  | 10  | 16243 | 1305 | 3.736322 | 0.040402 |
| green       | 1178 BETA_TUBULIN_BINDING                           | 3  | 10  | 16243 | 1305 | 3.736322 | 0.040402 |
| green       | 1337 PDZ_DOMAIN_BINDING                             | 3  | 10  | 16243 | 1305 | 3.736322 | 0.040402 |
| green       | 3261 chr11p12                                       | 3  | 10  | 16243 | 1305 | 3.736322 | 0.040402 |
| green       | 4562 REACTOME_ACTIVATION_OF_THE_AP1_FAMILY_OF_TF    | 3  | 10  | 16243 | 1305 | 3.736322 | 0.040402 |
| green       | 7257 DAVIES_MULTIPLE_MYELOMA_VS_MGUS_UP             | 3  | 10  | 16243 | 1305 | 3.736322 | 0.040402 |
| tan         | 6268 MATSUDA_NATURAL_KILLER_DIFFERENTIATION         | 8  | 433 | 15820 | 145  | 2.070941 | 0.040407 |
| black       | 7869 LU_EZH2_TARGETS_UP                             | 9  | 262 | 15991 | 283  | 1.972824 | 0.040409 |
| turquoise   | 4699 REACTOME_HIV_LIFE_CYCLE                        | 38 | 114 | 16139 | 4169 | 1.299512 | 0.040424 |
| lightyellow | 4894 ZHOU_INFLAMMATORY_RESPONSE_LIVE_UP             | 3  | 377 | 15876 | 33   | 3.919219 | 0.040432 |
| cyan        | 7351 RUTELLA_RESPONSE_TO_HGF_VS_CSF2RB_AND_IL4_U    | 5  | 398 | 15855 | 77   | 2.651733 | 0.040435 |
| magenta     | 3344 chr9p                                          | 1  | 4   | 16249 | 167  | 24.33084 | 0.040475 |
| magenta     | 4199 REACTOME_BETA_DEFENSINS                        | 1  | 4   | 16249 | 167  | 24.33084 | 0.040475 |
| magenta     | 4666 REACTOME_LIGAND_GATED_ION_CHANNEL_TRANSPO      | 1  | 4   | 16249 | 167  | 24.33084 | 0.040475 |
| magenta     | 7721 MIKKELSEN_NPC_ICP_WITH_H3K27ME3                | 1  | 4   | 16249 | 167  | 24.33084 | 0.040475 |
| yellow      | 8172 SMIRNOV_RESPONSE_TO_IR_6HR_UP                  | 21 | 160 | 16093 | 1426 | 1.495937 | 0.040502 |
| pink        | 1177 HYDROLASE_ACTIVITY_ACTING_ON_ESTER_BONDS       | 7  | 226 | 16027 | 228  | 2.207945 | 0.040506 |
| blue        | 8733 GSE15215_CD2_POS_VS_NEG_PDC_DN                 | 46 | 196 | 16057 | 2978 | 1.280886 | 0.040508 |
| greenyello  | 1948 GTGCAAT,MIR-25,MIR-32,MIR-92,MIR-363,MIR-367   | 6  | 272 | 15981 | 150  | 2.390147 | 0.040532 |
| green       | 2406 MORF_IL9                                       | 9  | 58  | 16195 | 1305 | 1.93258  | 0.040541 |
| red         | 6500 BROWNE_HCMV_INFECTION_14HR_DN                  | 14 | 258 | 15995 | 524  | 1.683103 | 0.040554 |
| grey60      | 4450 REACTOME_G_ALPHA_Q_SIGNALLING_EVENTS           | 2  | 118 | 16135 | 44   | 6.260786 | 0.040561 |
| lightgreen  | 358 CELL_STRUCTURE_DISASSEMBLY_DURING_APOPTOSIS     | 1  | 16  | 16237 | 42   | 24.18601 | 0.040573 |
| lightgreen  | 840 NEGATIVE_REGULATION_OF_BINDING                  | 1  | 16  | 16237 | 42   | 24.18601 | 0.040573 |
| lightgreen  | 1135 AMINE_RECEPTOR_ACTIVITY                        | 1  | 16  | 16237 | 42   | 24.18601 | 0.040573 |
| lightgreen  | 1312 DOUBLE_STRANDED_RNA_BINDING                    | 1  | 16  | 16237 | 42   | 24.18601 | 0.040573 |
| lightgreen  | 3031 BIOCARTA_NO2IL12_PATHWAY                       | 1  | 16  | 16237 | 42   | 24.18601 | 0.040573 |
| lightgreen  | 3100 BIOCARTA_41BB_PATHWAY                          | 1  | 16  | 16237 | 42   | 24.18601 | 0.040573 |
| lightgreen  | 3845 MODULE_424                                     | 1  | 16  | 16237 | 42   | 24.18601 | 0.040573 |
| lightgreen  | 5214 NADERI_BREAST_CANCER_PROGNOSIS_DN              | 1  | 16  | 16237 | 42   | 24.18601 | 0.040573 |
| lightgreen  | 5826 CAFFAREL_RESPONSE_TO_THC_8HR_5_UP              | 1  | 16  | 16237 | 42   | 24.18601 | 0.040573 |
| lightgreen  | 7470 ZHAN_LATE_DIFFERENTIATION_GENES_DN             | 1  | 16  | 16237 | 42   | 24.18601 | 0.040573 |
| lightgreen  | 7639 KORKOLA_EMBRYONIC_CARCINOMA_VS_SEMINOMA_       | 1  | 16  | 16237 | 42   | 24.18601 | 0.040573 |
| lightgreen  | 7668 HAHTOLA_CTCL_PATHOGENESIS                      | 1  | 16  | 16237 | 42   | 24.18601 | 0.040573 |
| blue        | 1504 V\$EVI1_02                                     | 24 | 92  | 16161 | 2978 | 1.423745 | 0.040579 |
| pink        | 6491 BROWNE_HCMV_INFECTION_24HR_DN                  | 5  | 134 | 16119 | 228  | 2.659891 | 0.040581 |
| pink        | 9642 GSE29615_DAY3_VS_DAY7_LAIV_FLU_VACCINE_PBMIC   | 5  | 134 | 16119 | 228  | 2.659891 | 0.040581 |
| pink        | 10146 GSE6566_STRONG_VS_WEAK_DC_STIMULATED_CD4_T    | 5  | 134 | 16119 | 228  | 2.659891 | 0.040581 |
| lightyellow | 7331 YOSHIMURA_MAPK8_TARGETS_UP                     | 5  | 947 | 15306 | 33   | 2.600397 | 0.040618 |
| purple      | 520 LIPID_METABOLIC_PROCESS                         | 6  | 260 | 15993 | 157  | 2.388976 | 0.04064  |
| purple      | 5039 MULLIGHAN_MLL_SIGNATURE_2_DN                   | 6  | 260 | 15993 | 157  | 2.388976 | 0.04064  |
| magenta     | 7148 LABBE_WNT3A_TARGETS_DN                         | 3  | 74  | 16179 | 167  | 3.945541 | 0.040645 |
| purple      | 7331 YOSHIMURA_MAPK8_TARGETS_UP                     | 15 | 947 | 15306 | 157  | 1.639741 | 0.040656 |
| magenta     | 1708 V\$TITF1_Q3                                    | 5  | 183 | 16070 | 167  | 2.659108 | 0.040688 |

|             |                                                  |     |     |       |      |          |          |
|-------------|--------------------------------------------------|-----|-----|-------|------|----------|----------|
| magenta     | 8918 GSE17721_LPS_VS_POLYIC_4H_BMDM_UP           | 5   | 183 | 16070 | 167  | 2.659108 | 0.040688 |
| magenta     | 9425 GSE24142_DN2_VS_DN3_THYMOCYTE_FETAL_DN      | 5   | 183 | 16070 | 167  | 2.659108 | 0.040688 |
| brown       | 142 RUFFLE                                       | 8   | 30  | 16223 | 2190 | 1.979056 | 0.040717 |
| lightyellow | 8381 LEF1_UP.V1_UP                               | 2   | 158 | 16095 | 33   | 6.234369 | 0.04073  |
| salmon      | 6170 ASTON_MAJOR_DEPRESSIVE_DISORDER_UP          | 2   | 41  | 16212 | 127  | 6.24275  | 0.040745 |
| salmon      | 6375 KAMMINGA_EZH2_TARGETS                       | 2   | 41  | 16212 | 127  | 6.24275  | 0.040745 |
| salmon      | 8246 BCAT_BILD_ET_AL_UP                          | 2   | 41  | 16212 | 127  | 6.24275  | 0.040745 |
| brown       | 6581 LIAN_LIPA_TARGETS_3M                        | 12  | 52  | 16201 | 2190 | 1.712645 | 0.040747 |
| lightgreen  | 2370 MORF_CTSB                                   | 2   | 124 | 16129 | 42   | 6.241551 | 0.04077  |
| lightgreen  | 2418 MORF_MAP2K7                                 | 2   | 124 | 16129 | 42   | 6.241551 | 0.04077  |
| red         | 1114 RAS_GTPASE_BINDING                          | 3   | 24  | 16229 | 524  | 3.877147 | 0.040806 |
| red         | 1271 KINASE_INHIBITOR_ACTIVITY                   | 3   | 24  | 16229 | 524  | 3.877147 | 0.040806 |
| red         | 2615 GNF2_CASP4                                  | 3   | 24  | 16229 | 524  | 3.877147 | 0.040806 |
| red         | 3792 MODULE_343                                  | 3   | 24  | 16229 | 524  | 3.877147 | 0.040806 |
| red         | 4039 PID_INTEGRIN2_PATHWAY                       | 3   | 24  | 16229 | 524  | 3.877147 | 0.040806 |
| red         | 5256 BERENJENO_TRANSFORMED_BY_RHOA_FOREVER_DN    | 3   | 24  | 16229 | 524  | 3.877147 | 0.040806 |
| black       | 5859 SCHAEFFER_PROSTATE_DEVELOPMENT_6HR_DN       | 14  | 478 | 15775 | 283  | 1.682082 | 0.040837 |
| greenyello  | 1755 V\$STAT6_01                                 | 5   | 204 | 16049 | 150  | 2.655719 | 0.040855 |
| greenyello  | 3313 chr3p21                                     | 5   | 204 | 16049 | 150  | 2.655719 | 0.040855 |
| pink        | 250 ACTIN_FILAMENT_ORGANIZATION                  | 2   | 23  | 16230 | 228  | 6.198703 | 0.040857 |
| pink        | 1360 OXIDOREDUCTASE_ACTIVITY_ACTING_ON_NADH_OR_I | 2   | 23  | 16230 | 228  | 6.198703 | 0.040857 |
| pink        | 4950 NEWMAN_ERCC6_TARGETS_DN                     | 2   | 23  | 16230 | 228  | 6.198703 | 0.040857 |
| pink        | 5257 CAIRO_PML_TARGETS_BOUND_BY_MYC_UP           | 2   | 23  | 16230 | 228  | 6.198703 | 0.040857 |
| pink        | 5347 HWANG_PROSTATE_CANCER_MARKERS               | 2   | 23  | 16230 | 228  | 6.198703 | 0.040857 |
| pink        | 7760 BAUS_TFF2_TARGETS_UP                        | 2   | 23  | 16230 | 228  | 6.198703 | 0.040857 |
| red         | 472 BEHAVIOR                                     | 7   | 99  | 16154 | 524  | 2.193134 | 0.040859 |
| red         | 3890 MODULE_503                                  | 7   | 99  | 16154 | 524  | 2.193134 | 0.040859 |
| red         | 7532 COULOUARN_TEMPORAL_TGFB1_SIGNATURE_UP       | 7   | 99  | 16154 | 524  | 2.193134 | 0.040859 |
| red         | 7738 YAO_TEMPORAL_RESPONSE_TO_PROGESTERONE_CLU!  | 7   | 99  | 16154 | 524  | 2.193134 | 0.040859 |
| brown       | 8567 GSE13484_3H_UNSTIM_VS_YF17D_VACCINE_STIM_PB | 34  | 187 | 16066 | 2190 | 1.349357 | 0.040869 |
| brown       | 8926 GSE17721_LPS_VS_POLYIC_16H_BMDM_UP          | 34  | 187 | 16066 | 2190 | 1.349357 | 0.040869 |
| brown       | 9057 GSE17721_POLYIC_VS_GARDIQUIMOD_0.5H_BMDM_C  | 34  | 187 | 16066 | 2190 | 1.349357 | 0.040869 |
| brown       | 9769 GSE339_CD4POS_VS_CD8POS_DC_DN               | 34  | 187 | 16066 | 2190 | 1.349357 | 0.040869 |
| lightcyan   | 8374 KRAS.LUNG_UP.V1_DN                          | 2   | 84  | 16169 | 62   | 6.241551 | 0.040869 |
| black       | 2207 WCAANNNYCAG_UNKNOWN                         | 8   | 222 | 16031 | 283  | 2.069589 | 0.040922 |
| yellow      | 7317 NICK_RESPONSE_TO_PROC_TREATMENT_UP          | 2   | 4   | 16249 | 1426 | 5.698808 | 0.040942 |
| black       | 4047 PID_IL6_7PATHWAY                            | 3   | 44  | 16209 | 283  | 3.915757 | 0.040967 |
| yellow      | 10060 GSE3982_BCELL_VS_BASOPHIL_UP               | 23  | 179 | 16074 | 1426 | 1.464498 | 0.04097  |
| green       | 6500 BROWNE_HCMV_INFECTION_14HR_DN               | 29  | 258 | 15995 | 1305 | 1.399914 | 0.040971 |
| cyan        | 9643 GSE29615_DAY3_VS_DAY7_LAIV_FLU_VACCINE_PBMC | 3   | 161 | 16092 | 77   | 3.933129 | 0.040983 |
| turquoise   | 7043 MITSIADES_RESPONSE_TO_APLIDIN_UP            | 121 | 410 | 15843 | 4169 | 1.150544 | 0.040987 |
| blue        | 2388 MORF_ESR1                                   | 33  | 134 | 16119 | 2978 | 1.344058 | 0.040999 |
| blue        | 9642 GSE29615_DAY3_VS_DAY7_LAIV_FLU_VACCINE_PBMC | 33  | 134 | 16119 | 2978 | 1.344058 | 0.040999 |
| yellow      | 1860 V\$COUP_DR1_Q6                              | 25  | 198 | 16055 | 1426 | 1.439093 | 0.041015 |
| yellow      | 9159 GSE17974_0H_VS_6H_IN_VITRO_ACT_CD4_TCELL_DN | 25  | 198 | 16055 | 1426 | 1.439093 | 0.041015 |
| yellow      | 9732 GSE31082_DN_VS_CD4_SP_THYMOCYTE_UP          | 25  | 198 | 16055 | 1426 | 1.439093 | 0.041015 |
| blue        | 2430 MORF_PAX7                                   | 47  | 201 | 16052 | 2978 | 1.276176 | 0.041019 |
| purple      | 9511 GSE2706_R848_VS_LPS_2H_STIM_DC_DN           | 4   | 134 | 16119 | 157  | 3.090218 | 0.041025 |
| grey60      | 7331 YOSHIMURA_MAPK8_TARGETS_UP                  | 6   | 947 | 15306 | 44   | 2.340357 | 0.041033 |
| purple      | 1518 V\$PAX6_01                                  | 3   | 79  | 16174 | 157  | 3.931226 | 0.041043 |
| purple      | 4331 REACTOME_BIOLOGICAL_OXIDATIONS              | 3   | 79  | 16174 | 157  | 3.931226 | 0.041043 |
| brown       | 6890 FOSTER_TOLERANT_MACROPHAGE_DN               | 65  | 391 | 15862 | 2190 | 1.233747 | 0.041084 |
| turquoise   | 5111 ELVIDGE_HIF2A_TARGETS_UP                    | 4   | 6   | 16247 | 4169 | 2.599025 | 0.041104 |
| turquoise   | 7003 YAMASHITA_SILENCED_BY_METHYLATION           | 4   | 6   | 16247 | 4169 | 2.599025 | 0.041104 |
| turquoise   | 4224 REACTOME_SIGNALING_BY_THE_B_CELL_RECEPTOR_B | 40  | 121 | 16132 | 4169 | 1.288773 | 0.041109 |
| turquoise   | 854 REGULATION_OF_METABOLIC_PROCESS              | 202 | 708 | 15545 | 4169 | 1.112294 | 0.041109 |
| turquoise   | 1239 RNA_BINDING                                 | 75  | 244 | 16009 | 4169 | 1.198321 | 0.041125 |
| red         | 5717 SHETH_LIVER_CANCER_VS_TXNIP_LOSS_PAM4       | 12  | 211 | 16042 | 524  | 1.76401  | 0.041131 |
| blue        | 9684 GSE29618_PRE_VS_DAY7_FLU_VACCINE_MDC_UP     | 37  | 153 | 16100 | 2978 | 1.319833 | 0.041151 |
| red         | 3788 MODULE_337                                  | 5   | 59  | 16194 | 524  | 2.628574 | 0.041164 |

|             |       |                                              |    |      |       |      |          |          |
|-------------|-------|----------------------------------------------|----|------|-------|------|----------|----------|
| red         | 6339  | PETROVA_PROX1_TARGETS_DN                     | 5  | 59   | 16194 | 524  | 2.628574 | 0.041164 |
| red         | 6986  | RIZKI_TUMOR_INVASIVENESS_2D_UP               | 5  | 59   | 16194 | 524  | 2.628574 | 0.041164 |
| midnightb   | 7499  | JISON_SICKLE_CELL_DISEASE_DN                 | 3  | 175  | 16078 | 71   | 3.924266 | 0.041173 |
| lightcyan   | 552   | DETECTION_OF_CHEMICAL_STIMULUS               | 1  | 11   | 16242 | 62   | 23.83138 | 0.041183 |
| lightcyan   | 626   | PROTEIN_TARGETING_TO_MEMBRANE                | 1  | 11   | 16242 | 62   | 23.83138 | 0.041183 |
| lightcyan   | 698   | SENSORY_PERCEPTION_OF_CHEMICAL_STIMULUS      | 1  | 11   | 16242 | 62   | 23.83138 | 0.041183 |
| lightcyan   | 742   | APOPTOTIC_MITOCHONDRIAL_CHANGES              | 1  | 11   | 16242 | 62   | 23.83138 | 0.041183 |
| lightcyan   | 1052  | REGULATION_OF_MEMBRANE_POTENTIAL             | 1  | 11   | 16242 | 62   | 23.83138 | 0.041183 |
| lightcyan   | 3057  | BIOCARTA_EIF2_PATHWAY                        | 1  | 11   | 16242 | 62   | 23.83138 | 0.041183 |
| lightcyan   | 3137  | chr9p12                                      | 1  | 11   | 16242 | 62   | 23.83138 | 0.041183 |
| lightcyan   | 4655  | REACTOME_REGULATION_OF_IFNA_SIGNALING        | 1  | 11   | 16242 | 62   | 23.83138 | 0.041183 |
| lightcyan   | 6211  | IIZUKA_LIVER_CANCER_EARLY_RECURRENCE         | 1  | 11   | 16242 | 62   | 23.83138 | 0.041183 |
| lightcyan   | 6433  | WHITESIDE_CISPLATIN_RESISTANCE_UP            | 1  | 11   | 16242 | 62   | 23.83138 | 0.041183 |
| blue        | 1072  | PROTEIN_DOMAIN_SPECIFIC_BINDING              | 18 | 65   | 16188 | 2978 | 1.51136  | 0.041221 |
| blue        | 3666  | MODULE_183                                   | 18 | 65   | 16188 | 2978 | 1.51136  | 0.041221 |
| blue        | 4427  | REACTOME_METABOLISM_OF_NUCLEOTIDES           | 18 | 65   | 16188 | 2978 | 1.51136  | 0.041221 |
| blue        | 5710  | FURUKAWA_DUSP6_TARGETS_PCI35_DN              | 18 | 65   | 16188 | 2978 | 1.51136  | 0.041221 |
| blue        | 6424  | ZAMORA_NOS2_TARGETS_UP                       | 18 | 65   | 16188 | 2978 | 1.51136  | 0.041221 |
| cyan        | 3689  | MODULE_209                                   | 2  | 68   | 16185 | 77   | 6.208174 | 0.041275 |
| cyan        | 3707  | MODULE_235                                   | 2  | 68   | 16185 | 77   | 6.208174 | 0.041275 |
| greenyello  | 2865  | KEGG_TYPE_I_DIABETES_MELLITUS                | 2  | 35   | 16218 | 150  | 6.191619 | 0.041276 |
| salmon      | 7965  | BAKKER_FOXO3_TARGETS_DN                      | 4  | 166  | 16087 | 127  | 3.083768 | 0.04128  |
| brown       | 8894  | GSE17721_CTRL_VS_CPG_24H_BMDM_UP             | 31 | 168  | 16085 | 2190 | 1.369436 | 0.041281 |
| turquoise   | 2599  | GNF2_RFC3                                    | 16 | 41   | 16212 | 4169 | 1.52138  | 0.041289 |
| cyan        | 348   | NUCLEOBASENUCLEOSIDENUCLEOTIDE_AND_NUCLEIC_  | 10 | 1136 | 15117 | 77   | 1.85808  | 0.041312 |
| brown       | 519   | MESODERM_DEVELOPMENT                         | 5  | 15   | 16238 | 2190 | 2.47382  | 0.041358 |
| brown       | 2931  | BIOCARTA_CDMAC_PATHWAY                       | 5  | 15   | 16238 | 2190 | 2.47382  | 0.041358 |
| brown       | 3794  | MODULE_346                                   | 5  | 15   | 16238 | 2190 | 2.47382  | 0.041358 |
| brown       | 4136  | REACTOME_BILE_ACID_AND_BILE_SALT_METABOLISM  | 5  | 15   | 16238 | 2190 | 2.47382  | 0.041358 |
| brown       | 5543  | HERNANDEZ_MITOTIC_ARREST_BY_DOCETAXEL_2_DN   | 5  | 15   | 16238 | 2190 | 2.47382  | 0.041358 |
| brown       | 8074  | STEINER_ERYTHROCYTE_MEMBRANE_GENES           | 5  | 15   | 16238 | 2190 | 2.47382  | 0.041358 |
| red         | 9925  | GSE37416_CTRL_VS_3H_F_TULARENSIS_LVS_NEUTROP | 10 | 165  | 16088 | 524  | 1.879829 | 0.041366 |
| black       | 5045  | TONKS_TARGETS_OF_RUNX1_RUNX1T1_FUSION_HSC_   | 7  | 183  | 16070 | 283  | 2.196818 | 0.041379 |
| black       | 8699  | GSE1460_DP_THYMOCYTE_VS_NAIVE_CD4_TCELL_ADU  | 7  | 183  | 16070 | 283  | 2.196818 | 0.041379 |
| black       | 8736  | GSE15324_NAIVE_VS_ACTIVATED_ELF4_KO_CD8_TCEL | 7  | 183  | 16070 | 283  | 2.196818 | 0.041379 |
| lightyellow | 7988  | LEE_BMP2_TARGETS_UP                          | 4  | 650  | 15603 | 33   | 3.030862 | 0.041407 |
| blue        | 939   | ESTABLISHMENT_AND_OR_MAINTENANCE_OF_CHROM    | 20 | 74   | 16179 | 2978 | 1.475051 | 0.041486 |
| blue        | 2035  | CAGGGTC,MIR-504                              | 20 | 74   | 16179 | 2978 | 1.475051 | 0.041486 |
| blue        | 5804  | LIU_COMMON_CANCER_GENES                      | 20 | 74   | 16179 | 2978 | 1.475051 | 0.041486 |
| yellow      | 5987  | KAUFFMANN_DNA_REPAIR_GENES                   | 28 | 227  | 16026 | 1426 | 1.405873 | 0.041487 |
| magenta     | 8435  | GSE10325_CD4_TCELL_VS_LUPUS_CD4_TCELL_DN     | 5  | 184  | 16069 | 167  | 2.644656 | 0.041491 |
| magenta     | 8808  | GSE15930_STIM_VS_STIM_AND_IL-12_72H_CD8_T_CE | 5  | 184  | 16069 | 167  | 2.644656 | 0.041491 |
| magenta     | 9527  | GSE2706_2H_VS_8H_R848_AND_LPS_STIM_DC_DN     | 5  | 184  | 16069 | 167  | 2.644656 | 0.041491 |
| magenta     | 9626  | GSE2826_WT_VS_BTK_KO_BCELL_UP                | 5  | 184  | 16069 | 167  | 2.644656 | 0.041491 |
| magenta     | 9818  | GSE360_DC_VS_MAC_L_DONOVANI_UP               | 5  | 184  | 16069 | 167  | 2.644656 | 0.041491 |
| red         | 8535  | GSE13306_TREG_VS_TCONV_SPLEEN_DN             | 11 | 188  | 16065 | 524  | 1.814835 | 0.041495 |
| red         | 8701  | GSE1460_DP_THYMOCYTE_VS_THYMIC_STROMAL_CEL   | 11 | 188  | 16065 | 524  | 1.814835 | 0.041495 |
| red         | 9412  | GSE24142_DN2_VS_DN3_THYMOCYTE_UP             | 11 | 188  | 16065 | 524  | 1.814835 | 0.041495 |
| red         | 9432  | GSE24634_NAIVE_CD4_TCELL_VS_DAY3_IL4_CONV_TR | 11 | 188  | 16065 | 524  | 1.814835 | 0.041495 |
| red         | 10009 | GSE3982_MAST_CELL_VS_TH1_DN                  | 11 | 188  | 16065 | 524  | 1.814835 | 0.041495 |
| red         | 10201 | GSE7852_LN_VS_FAT_TREG_DN                    | 11 | 188  | 16065 | 524  | 1.814835 | 0.041495 |
| pink        | 5497  | MYLLYKANGAS_AMPLIFICATION_HOT_SPOT_1         | 1  | 3    | 16250 | 228  | 23.7617  | 0.041499 |
| lightyellow | 6936  | HELLER_HDAC_TARGETS_SILENCED_BY_METHYLATION_ | 3  | 381  | 15872 | 33   | 3.878072 | 0.04151  |
| midnightb   | 5381  | RIZ_ERYTHROID_DIFFERENTIATION                | 2  | 74   | 16179 | 71   | 6.186905 | 0.041533 |
| brown       | 2350  | MORF_AP2M1                                   | 38 | 213  | 16040 | 2190 | 1.324017 | 0.041536 |
| purple      | 7349  | RUTELLA_RESPONSE_TO_HGF_UP                   | 8  | 402  | 15851 | 157  | 2.060145 | 0.041569 |
| pink        | 7498  | JISON_SICKLE_CELL_DISEASE_UP                 | 6  | 180  | 16073 | 228  | 2.37617  | 0.041591 |
| pink        | 8589  | GSE13485_DAY3_VS_DAY7_YF17D_VACCINE_PBMCDI   | 6  | 180  | 16073 | 228  | 2.37617  | 0.041591 |
| pink        | 9341  | GSE22886_IGG_IGA_MEMORY_BCELL_VS_BM_PLASMA   | 6  | 180  | 16073 | 228  | 2.37617  | 0.041591 |
| cyan        | 8243  | P53_DN.V1_DN                                 | 3  | 162  | 16091 | 77   | 3.90885  | 0.041618 |

|             |                                                    |    |     |       |      |          |          |
|-------------|----------------------------------------------------|----|-----|-------|------|----------|----------|
| cyan        | 8541 GSE13306_RA_VS_UNTREATED_TREG_DN              | 3  | 162 | 16091 | 77   | 3.90885  | 0.041618 |
| lightyellow | 9716 GSE30083_SP2_VS_SP3_THYMOCYTE_UP              | 2  | 160 | 16093 | 33   | 6.156439 | 0.041667 |
| lightyellow | 9720 GSE30083_SP3_VS_SP4_THYMOCYTE_UP              | 2  | 160 | 16093 | 33   | 6.156439 | 0.041667 |
| pink        | 7265 BOYLAN_MULTIPLE_MYELOMA_C_D_UP                | 5  | 135 | 16118 | 228  | 2.640188 | 0.041681 |
| grey60      | 1324 TRANSMEMBRANE_RECEPTOR_ACTIVITY               | 3  | 285 | 15968 | 44   | 3.888278 | 0.041691 |
| purple      | 1599 V\$GATA_C                                     | 5  | 196 | 16057 | 157  | 2.640875 | 0.041695 |
| purple      | 5048 TONKS_TARGETS_OF_RUNX1_RUNX1T1_FUSION_MON     | 5  | 196 | 16057 | 157  | 2.640875 | 0.041695 |
| purple      | 10038 GSE3982_MAC_VS_CENT_MEMORY_CD4_TCELL_UP      | 5  | 196 | 16057 | 157  | 2.640875 | 0.041695 |
| purple      | 10209 GSE7852_THYMUS_VS_FAT_TCONV_DN               | 5  | 196 | 16057 | 157  | 2.640875 | 0.041695 |
| greenyello  | 2809 KEGG_NEUROACTIVE_LIGAND_RECEPTOR_INTERACTIO   | 4  | 141 | 16112 | 150  | 3.073853 | 0.041703 |
| greenyello  | 3816 MODULE_379                                    | 4  | 141 | 16112 | 150  | 3.073853 | 0.041703 |
| greenyello  | 7523 CHIANG_LIVER_CANCER_SUBCLASS_CTNNB1_DN        | 4  | 141 | 16112 | 150  | 3.073853 | 0.041703 |
| turquoise   | 4374 REACTOME_OPIOID_SIGNALLING                    | 24 | 67  | 16186 | 4169 | 1.396491 | 0.041724 |
| lightcyan   | 3642 MODULE_157                                    | 2  | 85  | 16168 | 62   | 6.168121 | 0.041754 |
| lightcyan   | 7861 CHICAS_RB1_TARGETS_LOW_SERUM                  | 2  | 85  | 16168 | 62   | 6.168121 | 0.041754 |
| greenyello  | 7963 PASINI_SUZ12_TARGETS_DN                       | 6  | 274 | 15979 | 150  | 2.372701 | 0.041755 |
| midnightb   | 9834 GSE360_L_DONOVANI_VS_B_MALAYI_HIGH_DOSE_DC    | 3  | 176 | 16077 | 71   | 3.901969 | 0.04176  |
| blue        | 1977 TGCACGA,MIR-517A,MIR-517C                     | 6  | 15  | 16238 | 2978 | 2.183076 | 0.04178  |
| blue        | 2972 BIOCARTA_EIF_PATHWAY                          | 6  | 15  | 16238 | 2978 | 2.183076 | 0.04178  |
| blue        | 3115 BIOCARTA_ARF_PATHWAY                          | 6  | 15  | 16238 | 2978 | 2.183076 | 0.04178  |
| blue        | 4103 PID_ANTHRAXPATHWAY                            | 6  | 15  | 16238 | 2978 | 2.183076 | 0.04178  |
| blue        | 4253 REACTOME_SYNTHESIS_OF_PIPS_AT_THE_GOLGI_MEM   | 6  | 15  | 16238 | 2978 | 2.183076 | 0.04178  |
| blue        | 4360 REACTOME_PROCESSIVE_SYNTHESIS_ON_THE_LAGGIN   | 6  | 15  | 16238 | 2978 | 2.183076 | 0.04178  |
| blue        | 5852 RICKMAN_TUMOR_DIFFERENTIATED_MODERATELY_VS    | 6  | 15  | 16238 | 2978 | 2.183076 | 0.04178  |
| blue        | 5983 COLLIS_PRKDC_REGULATORS                       | 6  | 15  | 16238 | 2978 | 2.183076 | 0.04178  |
| blue        | 6002 NIKOLSKY_BREAST_CANCER_12Q24_AMPLICON         | 6  | 15  | 16238 | 2978 | 2.183076 | 0.04178  |
| blue        | 7344 RAY_TARGETS_OF_P210_BCR_ABL_FUSION_DN         | 6  | 15  | 16238 | 2978 | 2.183076 | 0.04178  |
| turquoise   | 9212 GSE17974_1.5H_VS_72H_IL4_AND_ANTI_IL12_ACT_CD | 62 | 198 | 16055 | 4169 | 1.220754 | 0.041805 |
| turquoise   | 9732 GSE31082_DN_VS_CD4_SP_THYMOCYTE_UP            | 62 | 198 | 16055 | 4169 | 1.220754 | 0.041805 |
| lightyellow | 2774 KEGG_NICOTINATE_AND_NICOTINAMIDE_METABOLISM   | 1  | 21  | 16232 | 33   | 23.4531  | 0.041809 |
| lightyellow | 4144 REACTOME_METABOLISM_OF_STEROID_HORMONES_      | 1  | 21  | 16232 | 33   | 23.4531  | 0.041809 |
| lightyellow | 4251 REACTOME_REGULATION_OF_HYPOXIA_INDUCIBLE_FA   | 1  | 21  | 16232 | 33   | 23.4531  | 0.041809 |
| lightyellow | 6024 JI_METASTASIS_REPRESSED_BY_STK11              | 1  | 21  | 16232 | 33   | 23.4531  | 0.041809 |
| lightyellow | 6585 DELLA_RESPONSE_TO_TSA_AND_BUTYRATE            | 1  | 21  | 16232 | 33   | 23.4531  | 0.041809 |
| lightyellow | 7890 FIGUEROA_AML_METHYLATION_CLUSTER_6_DN         | 1  | 21  | 16232 | 33   | 23.4531  | 0.041809 |
| grey60      | 828 AMINE_METABOLIC_PROCESS                        | 2  | 120 | 16133 | 44   | 6.156439 | 0.041813 |
| grey60      | 8332 PDGF_ERK_DN.V1_UP                             | 2  | 120 | 16133 | 44   | 6.156439 | 0.041813 |
| green       | 2414 MORF_LTK                                      | 15 | 115 | 16138 | 1305 | 1.624488 | 0.041814 |
| cyan        | 4767 REACTOME_INITIAL_TRIGGERING_OF_COMPLEMENT     | 1  | 9   | 16244 | 77   | 23.4531  | 0.041849 |
| cyan        | 4860 ZERBINI_RESPONSE_TO_SULINDAC_UP               | 1  | 9   | 16244 | 77   | 23.4531  | 0.041849 |
| cyan        | 5180 YEMELYANOV_GR_TARGETS_DN                      | 1  | 9   | 16244 | 77   | 23.4531  | 0.041849 |
| cyan        | 5634 OXFORD_RALB_TARGETS_DN                        | 1  | 9   | 16244 | 77   | 23.4531  | 0.041849 |
| cyan        | 7552 YAMANAKA_GLIOMASTOMA_SURVIVAL_DN              | 1  | 9   | 16244 | 77   | 23.4531  | 0.041849 |
| cyan        | 7746 YIH_RESPONSE_TO_ARSENITE_C5                   | 1  | 9   | 16244 | 77   | 23.4531  | 0.041849 |
| pink        | 1978 GTCNYYATGR_UNKNOWN                            | 4  | 93  | 16160 | 228  | 3.066025 | 0.041872 |
| pink        | 8082 PLASARI_TGFB1_SIGNALING_VIA_NFIC_1HR_DN       | 4  | 93  | 16160 | 228  | 3.066025 | 0.041872 |
| cyan        | 7349 RUTELLA_RESPONSE_TO_HGF_UP                    | 5  | 402 | 15851 | 77   | 2.625347 | 0.041913 |
| cyan        | 8091 DELACROIX_RAR_BOUND_ES                        | 5  | 402 | 15851 | 77   | 2.625347 | 0.041913 |
| turquoise   | 3126 chr10q23                                      | 27 | 77  | 16176 | 4169 | 1.367019 | 0.041922 |
| turquoise   | 6969 WALLACE_PROSTATE_CANCER_RACE_DN               | 27 | 77  | 16176 | 4169 | 1.367019 | 0.041922 |
| pink        | 876 REGULATION_OF_TRANSPORT                        | 3  | 55  | 16198 | 228  | 3.888278 | 0.041937 |
| pink        | 3723 MODULE_254                                    | 3  | 55  | 16198 | 228  | 3.888278 | 0.041937 |
| pink        | 6490 CHANG_IMMORTALIZED_BY_HP31_DN                 | 3  | 55  | 16198 | 228  | 3.888278 | 0.041937 |
| pink        | 7420 MCMURRAY_TP53_HRAS_COOPERATION_RESPONSE_D     | 3  | 55  | 16198 | 228  | 3.888278 | 0.041937 |
| yellow      | 4535 REACTOME_METABOLISM_OF_MRNA                   | 26 | 208 | 16045 | 1426 | 1.424702 | 0.041945 |
| yellow      | 9877 GSE360_L_MAJOR_VS_M_TUBERCULOSIS_MAC_DN       | 22 | 170 | 16083 | 1426 | 1.474986 | 0.041946 |
| purple      | 395 POSITIVE_REGULATION_OF_CATALYTIC_ACTIVITY      | 4  | 135 | 16118 | 157  | 3.067327 | 0.041971 |
| brown       | 10008 GSE3982_MAST_CELL_VS_TH1_UP                  | 33 | 181 | 16072 | 2190 | 1.353084 | 0.041983 |
| yellow      | 7433 HSIAO_HOUSEKEEPING_GENES                      | 44 | 385 | 15868 | 1426 | 1.302585 | 0.041993 |
| cyan        | 694 PROTEIN_KINASE_CASCADE                         | 4  | 276 | 15977 | 77   | 3.0591   | 0.041993 |

|             |                                                    |    |     |       |      |          |          |
|-------------|----------------------------------------------------|----|-----|-------|------|----------|----------|
| brown       | 8158 ALTEMEIER_RESPONSE_TO_LPS_WITH_MECHANICAL_V   | 23 | 118 | 16135 | 2190 | 1.446556 | 0.042001 |
| red         | 390 GAMETE_GENERATION                              | 6  | 79  | 16174 | 524  | 2.355735 | 0.042027 |
| red         | 2137 AGGTGCA,MIR-500                               | 6  | 79  | 16174 | 524  | 2.355735 | 0.042027 |
| magenta     | 6918 KONDO_PROSTATE_CANCER_WITH_H3K27ME3           | 3  | 75  | 16178 | 167  | 3.892934 | 0.042029 |
| magenta     | 8178 WARTERS_RESPONSE_TO_IR_SKIN                   | 3  | 75  | 16178 | 167  | 3.892934 | 0.042029 |
| salmon      | 6218 PENG_RAPAMYCIN_RESPONSE_DN                    | 5  | 243 | 16010 | 127  | 2.633259 | 0.042041 |
| magenta     | 3198 chr22q11                                      | 4  | 127 | 16126 | 167  | 3.065302 | 0.042046 |
| red         | 8310 CRX_NRL_DN.V1_UP                              | 8  | 121 | 16132 | 524  | 2.050722 | 0.042059 |
| turquoise   | 8882 GSE17721_CTRL_VS_CPG_1H_BMDM_UP               | 60 | 191 | 16062 | 4169 | 1.224671 | 0.042065 |
| turquoise   | 8937 GSE17721_POLYIC_VS_PAM3CSK4_4H_BMDM_DN        | 60 | 191 | 16062 | 4169 | 1.224671 | 0.042065 |
| red         | 6979 IWANAGA_CARCIANOGENESIS_BY_KRAS_UP            | 9  | 143 | 16110 | 524  | 1.95213  | 0.042084 |
| red         | 8272 JNK_DN.V1_UP                                  | 9  | 143 | 16110 | 524  | 1.95213  | 0.042084 |
| blue        | 849 REGULATION_OF_CELL_CELL_ADHESION               | 4  | 8   | 16245 | 2978 | 2.728845 | 0.042127 |
| blue        | 3101 BIOCARTA_KREB_PATHWAY                         | 4  | 8   | 16245 | 2978 | 2.728845 | 0.042127 |
| blue        | 4380 REACTOME_ADENYLATE_CYCLASE_ACTIVATING_PATHV   | 4  | 8   | 16245 | 2978 | 2.728845 | 0.042127 |
| blue        | 5209 KOINUMA_COLON_CANCER_MSI_UP                   | 4  | 8   | 16245 | 2978 | 2.728845 | 0.042127 |
| blue        | 7425 MIKKELSEN_PARTIALLY_REPROGRAMMED_TO_PLURIPC   | 4  | 8   | 16245 | 2978 | 2.728845 | 0.042127 |
| blue        | 7833 NOUSHMEHR_GBM_SOMATIC_MUTATED                 | 4  | 8   | 16245 | 2978 | 2.728845 | 0.042127 |
| yellow      | 8464 GSE11864_UNTREATED_VS_CSF1_PAM3CYS_IN_MAC_I   | 24 | 189 | 16064 | 1426 | 1.447316 | 0.042128 |
| yellow      | 9211 GSE17974_0.5H_VS_72H_IL4_AND_ANTI_IL12_ACT_CD | 24 | 189 | 16064 | 1426 | 1.447316 | 0.042128 |
| yellow      | 9434 GSE24634_NAIVE_CD4_TCELL_VS_DAY5_IL4_CONV_TR  | 24 | 189 | 16064 | 1426 | 1.447316 | 0.042128 |
| lightyellow | 8935 GSE17721_POLYIC_VS_PAM3CSK4_2H_BMDM_DN        | 2  | 161 | 16092 | 33   | 6.118201 | 0.042138 |
| lightyellow | 8985 GSE17721_LPS_VS_PAM3CSK4_0.5H_BMDM_DN         | 2  | 161 | 16092 | 33   | 6.118201 | 0.042138 |
| green       | 9687 GSE29618_PRE_VS_DAY7_POST_LAIV_FLU_VACCINE_B  | 19 | 155 | 16098 | 1305 | 1.526669 | 0.042188 |
| brown       | 4059 PID_ERA_GENOMIC_PATHWAY                       | 13 | 58  | 16195 | 2190 | 1.663431 | 0.042228 |
| brown       | 6903 KYNG_DNA_DAMAGE_BY_UV                         | 13 | 58  | 16195 | 2190 | 1.663431 | 0.042228 |
| brown       | 5173 ENK_UV_RESPONSE_EPIDERMIS_UP                  | 47 | 272 | 15981 | 2190 | 1.282385 | 0.042257 |
| red         | 5423 GALLUZZI_PERMEABILIZE_MITOCHONDRIA            | 4  | 41  | 16212 | 524  | 3.026066 | 0.042268 |
| red         | 5779 GROSS_HYPOXIA_VIA_ELK3_ONLY_DN                | 4  | 41  | 16212 | 524  | 3.026066 | 0.042268 |
| red         | 6213 BECKER_TAMOXIFEN_RESISTANCE_DN                | 4  | 41  | 16212 | 524  | 3.026066 | 0.042268 |
| turquoise   | 8644 GSE14308_TH1_VS_NATURAL_TREG_UP               | 58 | 184 | 16069 | 4169 | 1.228887 | 0.042284 |
| turquoise   | 9263 GSE20366_EX_VIVO_VS_DEC205_CONVERSION_DN      | 58 | 184 | 16069 | 4169 | 1.228887 | 0.042284 |
| magenta     | 8255 CAMP_UP.V1_DN                                 | 5  | 185 | 16068 | 167  | 2.630361 | 0.042304 |
| magenta     | 8280 MTOR_UP.N4.V1_UP                              | 5  | 185 | 16068 | 167  | 2.630361 | 0.042304 |
| magenta     | 9868 GSE360_L_DONOVANI_VS_M_TUBERCULOSIS_MAC_UF    | 5  | 185 | 16068 | 167  | 2.630361 | 0.042304 |
| greenyello  | 1867 V\$MYB_Q3                                     | 5  | 206 | 16047 | 150  | 2.629935 | 0.042307 |
| green       | 612 REGULATION_OF_NEUROTRANSMITTER_LEVELS          | 4  | 17  | 16236 | 1305 | 2.930449 | 0.042321 |
| green       | 622 ESTABLISHMENT_OF_ORGANELLE_LOCALIZATION        | 4  | 17  | 16236 | 1305 | 2.930449 | 0.042321 |
| green       | 751 DIGESTION                                      | 4  | 17  | 16236 | 1305 | 2.930449 | 0.042321 |
| green       | 3097 BIOCARTA_TEL_PATHWAY                          | 4  | 17  | 16236 | 1305 | 2.930449 | 0.042321 |
| green       | 4212 REACTOME_SIGNALING_BY_HIPPO                   | 4  | 17  | 16236 | 1305 | 2.930449 | 0.042321 |
| green       | 4480 REACTOME_G_BETA_GAMMA_SIGNALLING_THROUGH      | 4  | 17  | 16236 | 1305 | 2.930449 | 0.042321 |
| green       | 7785 RUAN_RESPONSE_TO_TROGLITAZONE_DN              | 4  | 17  | 16236 | 1305 | 2.930449 | 0.042321 |
| turquoise   | 2362 MORF_CDC10                                    | 46 | 142 | 16111 | 4169 | 1.262906 | 0.042333 |
| midnightb   | 10193 GSE7852_TREG_VS_TCONV_LN_DN                  | 3  | 177 | 16076 | 71   | 3.879924 | 0.042351 |
| greenyello  | 7850 KIM_ALL_DISORDERS_CALB1_CORR_UP               | 9  | 500 | 15753 | 150  | 1.95036  | 0.04238  |
| magenta     | 5876 KOYAMA_SEMA3B_TARGETS_UP                      | 6  | 247 | 16006 | 167  | 2.36413  | 0.042429 |
| brown       | 1027 NEGATIVE_REGULATION_OF_BIOSYNTHETIC_PROCESS   | 7  | 25  | 16228 | 2190 | 2.078009 | 0.042433 |
| brown       | 3111 BIOCARTA_CREB_PATHWAY                         | 7  | 25  | 16228 | 2190 | 2.078009 | 0.042433 |
| brown       | 4034 PID_LIS1PATHWAY                               | 7  | 25  | 16228 | 2190 | 2.078009 | 0.042433 |
| brown       | 6900 JEPSEN_SMRT_TARGETS                           | 7  | 25  | 16228 | 2190 | 2.078009 | 0.042433 |
| brown       | 7393 LEE_DOUBLE_POLAR_THYMOCYTE                    | 7  | 25  | 16228 | 2190 | 2.078009 | 0.042433 |
| brown       | 8157 HOLLEMAN_ASPARAGINASE_RESISTANCE_ALL_DN       | 7  | 25  | 16228 | 2190 | 2.078009 | 0.042433 |
| turquoise   | 8861 GSE17721_CTRL_VS_POLYIC_12H_BMDM_DN           | 56 | 177 | 16076 | 4169 | 1.233435 | 0.042454 |
| brown       | 8562 GSE13484_UNSTIM_VS_3H_YF17D_VACCINE_STIM_PB   | 35 | 194 | 16059 | 2190 | 1.338923 | 0.042462 |
| brown       | 8574 GSE13485_CTRL_VS_DAY1_YF17D_VACCINE_PBMUC_UP  | 35 | 194 | 16059 | 2190 | 1.338923 | 0.042462 |
| brown       | 8694 GSE1460_DP_VS_CD4_THYMOCYTE_UP                | 35 | 194 | 16059 | 2190 | 1.338923 | 0.042462 |
| brown       | 8993 GSE17721_LPS_VS_PAM3CSK4_6H_BMDM_DN           | 35 | 194 | 16059 | 2190 | 1.338923 | 0.042462 |
| brown       | 9079 GSE17721_LPS_VS_GARDIQUIMOD_2H_BMDM_DN        | 35 | 194 | 16059 | 2190 | 1.338923 | 0.042462 |
| brown       | 9763 GSE3337_CTRL_VS_16H_IFNG_IN_CD8POS_DC_DN      | 35 | 194 | 16059 | 2190 | 1.338923 | 0.042462 |

|             |                                                  |     |     |       |      |          |          |
|-------------|--------------------------------------------------|-----|-----|-------|------|----------|----------|
| grey60      | 3903 MODULE_530                                  | 1   | 16  | 16237 | 44   | 23.08665 | 0.042466 |
| grey60      | 5255 BERENJENO_TRANSFORMED_BY_RHOA_FOREVER_UP    | 1   | 16  | 16237 | 44   | 23.08665 | 0.042466 |
| grey60      | 6054 NELSON_RESPONSE_TO_ANDROGEN_DN              | 1   | 16  | 16237 | 44   | 23.08665 | 0.042466 |
| grey60      | 7203 MATTHEWS_AP1_TARGETS                        | 1   | 16  | 16237 | 44   | 23.08665 | 0.042466 |
| grey60      | 7219 ALONSO_METASTASIS_NEURAL_UP                 | 1   | 16  | 16237 | 44   | 23.08665 | 0.042466 |
| purple      | 1074 G_PROTEIN_COUPLED_RECEPTOR_BINDING          | 2   | 34  | 16219 | 157  | 6.089547 | 0.042516 |
| purple      | 1367 PATTERN_BINDING                             | 2   | 34  | 16219 | 157  | 6.089547 | 0.042516 |
| purple      | 1467 V\$HOX13_01                                 | 2   | 34  | 16219 | 157  | 6.089547 | 0.042516 |
| purple      | 4448 REACTOME_REGULATION_OF_INSULIN_SECRETION_BY | 2   | 34  | 16219 | 157  | 6.089547 | 0.042516 |
| purple      | 4625 REACTOME_REGULATION_OF_WATER_BALANCE_BY_R   | 2   | 34  | 16219 | 157  | 6.089547 | 0.042516 |
| purple      | 5539 HERNANDEZ_MITOTIC_ARREST_BY_DOCETAXEL_1_DN  | 2   | 34  | 16219 | 157  | 6.089547 | 0.042516 |
| black       | 1356 HORMONE_ACTIVITY                            | 2   | 19  | 16234 | 283  | 6.045378 | 0.042518 |
| black       | 5250 GAUSSMANN_MLL_AF4_FUSION_TARGETS_E_DN       | 2   | 19  | 16234 | 283  | 6.045378 | 0.042518 |
| black       | 5682 KIM_MYCL1_AMPLIFICATION_TARGETS_DN          | 2   | 19  | 16234 | 283  | 6.045378 | 0.042518 |
| black       | 7388 HOFMANN_MYELODYSPLASTIC_SYNDROM_RISK_UP     | 2   | 19  | 16234 | 283  | 6.045378 | 0.042518 |
| black       | 7784 DAZARD_UV_RESPONSE_CLUSTER_G28              | 2   | 19  | 16234 | 283  | 6.045378 | 0.042518 |
| pink        | 1821 V\$SMAD3_Q6                                 | 6   | 181 | 16072 | 228  | 2.363042 | 0.042535 |
| pink        | 6364 YAGI_AML_FAB_MARKERS                        | 6   | 181 | 16072 | 228  | 2.363042 | 0.042535 |
| pink        | 9068 GSE17721_POLYIC_VS_GARDIQUIMOD_12H_BMDM_U   | 6   | 181 | 16072 | 228  | 2.363042 | 0.042535 |
| pink        | 9075 GSE17721_LPS_VS_GARDIQUIMOD_0.5H_BMDM_DN    | 6   | 181 | 16072 | 228  | 2.363042 | 0.042535 |
| pink        | 9415 GSE24142_EARLY_THYMIC_PROGENITOR_VS_DN2_THY | 6   | 181 | 16072 | 228  | 2.363042 | 0.042535 |
| midnightb   | 1934 GGCNRNWCTTYS_UNKNOWN                        | 2   | 75  | 16178 | 71   | 6.104413 | 0.042553 |
| midnightb   | 4902 PUIFFE_INVASION_INHIBITED_BY_ASCITES_UP     | 2   | 75  | 16178 | 71   | 6.104413 | 0.042553 |
| midnightb   | 6166 ROSS_AML_WITH_MLL_FUSIONS                   | 2   | 75  | 16178 | 71   | 6.104413 | 0.042553 |
| salmon      | 6795 KRIGE_RESPONSE_TO_TOSEDOSTAT_6HR_DN         | 12  | 880 | 15373 | 127  | 1.745132 | 0.04256  |
| magenta     | 266 POSITIVE_REGULATION_OF_RESPONSE_TO_STIMULUS  | 2   | 32  | 16221 | 167  | 6.08271  | 0.042563 |
| magenta     | 5058 PAPASPYRIDONOS_UNSTABLE_ATEROSCLEROTIC_PLAQ | 2   | 32  | 16221 | 167  | 6.08271  | 0.042563 |
| lightgreen  | 8554 GSE13411_IGM_VS_SWITCHED_MEMORY_BCELL_UP    | 2   | 127 | 16126 | 42   | 6.094113 | 0.042569 |
| salmon      | 553 POSITIVE_REGULATION_OF_HYDROLASE_ACTIVITY    | 2   | 42  | 16211 | 127  | 6.094113 | 0.042569 |
| salmon      | 2549 GCM_RAF1                                    | 2   | 42  | 16211 | 127  | 6.094113 | 0.042569 |
| blue        | 866 CELL_CYCLE_ARREST_GO_0007050                 | 15  | 52  | 16201 | 2978 | 1.574334 | 0.042571 |
| blue        | 5793 BUYTAERT_PHOTODYNAMIC_THERAPY_STRESS_DN     | 128 | 607 | 15646 | 2978 | 1.15088  | 0.042589 |
| greenyello  | 6553 BROWNE_HCMV_INFECTION_48HR_DN               | 8   | 423 | 15830 | 150  | 2.049236 | 0.042598 |
| turquoise   | 9239 GSE18791_UNSTIM_VS_NEWCATSLE_VIRUS_DC_1H_DI | 50  | 156 | 16097 | 4169 | 1.249531 | 0.042611 |
| lightyellow | 5010 TAKEDA_TARGETS_OF_NUP98_HOXA9_FUSION_3D_UF  | 2   | 162 | 16091 | 33   | 6.080434 | 0.042612 |
| greenyello  | 1748 V\$NKX22_01                                 | 4   | 142 | 16111 | 150  | 3.052207 | 0.042615 |
| greenyello  | 8330 IL21_UP.V1_UP                               | 4   | 142 | 16111 | 150  | 3.052207 | 0.042615 |
| turquoise   | 795 PEPTIDYL_AMINO_ACID_MODIFICATION             | 20  | 54  | 16199 | 4169 | 1.443903 | 0.042621 |
| turquoise   | 6448 GENTILE_UV_RESPONSE_CLUSTER_D4              | 20  | 54  | 16199 | 4169 | 1.443903 | 0.042621 |
| turquoise   | 2340 MORF_TERF2IP                                | 37  | 111 | 16142 | 4169 | 1.299512 | 0.042698 |
| greenyello  | 2885 KEGG_PROSTATE_CANCER                        | 3   | 84  | 16169 | 150  | 3.869762 | 0.042704 |
| tan         | 10217 GSE8515_CTRL_VS_IL6_4H_STIM_MAC_DN         | 4   | 147 | 16106 | 145  | 3.050059 | 0.042708 |
| salmon      | 6797 KRIGE_RESPONSE_TO_TOSEDOSTAT_24HR_DN        | 13  | 980 | 15273 | 127  | 1.697646 | 0.04274  |
| black       | 1917 V\$SP1_Q6_01                                | 8   | 224 | 16029 | 283  | 2.051111 | 0.042759 |
| red         | 6377 BASSO_CD40_SIGNALING_UP                     | 7   | 100 | 16153 | 524  | 2.171202 | 0.04277  |
| pink        | 6373 IGLESIAS_E2F_TARGETS_UP                     | 5   | 136 | 16117 | 228  | 2.620775 | 0.042799 |
| red         | 6086 GOLDRATH_HOMEOSTATIC_PROLIFERATION          | 10  | 166 | 16087 | 524  | 1.868505 | 0.04281  |
| red         | 8490 GSE11924_TH2_VS_TH17_CD4_TCELL_UP           | 10  | 166 | 16087 | 524  | 1.868505 | 0.04281  |
| red         | 9883 GSE360_T_GONDII_VS_M_TUBERCULOSIS_MAC_DN    | 10  | 166 | 16087 | 524  | 1.868505 | 0.04281  |
| salmon      | 605 RNA_PROCESSING                               | 4   | 168 | 16085 | 127  | 3.047057 | 0.042821 |
| salmon      | 5741 PUJANA_XPRSS_INT_NETWORK                    | 4   | 168 | 16085 | 127  | 3.047057 | 0.042821 |
| salmon      | 10147 GSE6566_STRONG_VS_WEAK_DC_STIMULATED_CD4_T | 4   | 168 | 16085 | 127  | 3.047057 | 0.042821 |
| red         | 8923 GSE17721_LPS_VS_POLYIC_8H_BMDM_DN           | 11  | 189 | 16064 | 524  | 1.805232 | 0.042841 |
| red         | 10044 GSE3982_MAC_VS_TH2_UP                      | 11  | 189 | 16064 | 524  | 1.805232 | 0.042841 |
| midnightb   | 527 PURINE_RIBONUCLEOTIDE_METABOLIC_PROCESS      | 1   | 10  | 16243 | 71   | 22.89155 | 0.042847 |
| midnightb   | 596 PROTEIN_STABILIZATION                        | 1   | 10  | 16243 | 71   | 22.89155 | 0.042847 |
| midnightb   | 4272 REACTOME_REVERSIBLE_HYDRATION_OF_CARBON_DI  | 1   | 10  | 16243 | 71   | 22.89155 | 0.042847 |
| midnightb   | 5406 TURJANSKI_MAPK14_TARGETS                    | 1   | 10  | 16243 | 71   | 22.89155 | 0.042847 |
| midnightb   | 5927 AMIT_EGF_RESPONSE_20_HELA                   | 1   | 10  | 16243 | 71   | 22.89155 | 0.042847 |
| green       | 5928 AMIT_EGF_RESPONSE_40_HELA                   | 7   | 41  | 16212 | 1305 | 2.126362 | 0.042872 |

|            |                                                    |     |     |       |      |          |          |
|------------|----------------------------------------------------|-----|-----|-------|------|----------|----------|
| yellow     | 7537 HOSHIDA_LIVER_CANCER_SURVIVAL_DN              | 13  | 88  | 16165 | 1426 | 1.683739 | 0.042875 |
| green      | 4365 REACTOME_SIGNALING_BY_GPCR                    | 44  | 421 | 15832 | 1305 | 1.301648 | 0.042891 |
| lightcyan  | 7068 SMID_BREAST_CANCER_BASAL_UP                   | 5   | 504 | 15749 | 62   | 2.600646 | 0.042899 |
| purple     | 8331 PDGF_ERK_DN.V1_DN                             | 4   | 136 | 16117 | 157  | 3.044773 | 0.042931 |
| green      | 1579 V\$CREB_Q4                                    | 27  | 238 | 16015 | 1305 | 1.412895 | 0.042931 |
| midnightb  | 9888 GSE360_LOW_DOSE_B_MALAYI_VS_M_TUBERCULOSIS    | 3   | 178 | 16075 | 71   | 3.858126 | 0.042946 |
| brown      | 4835 FOURNIER_ACINAR_DEVELOPMENT_EARLY_UP          | 6   | 20  | 16233 | 2190 | 2.226438 | 0.043015 |
| green      | 7962 PASINI_SUZ12_TARGETS_UP                       | 13  | 96  | 16157 | 1305 | 1.686534 | 0.043024 |
| green      | 9029 GSE17721_PAM3CSK4_VS_GADIQUIMOD_6H_BMDM_      | 22  | 186 | 16067 | 1305 | 1.473102 | 0.043043 |
| green      | 9930 GSE37416_CTRL_VS_24H_F_TULARENSIS_LVS_NEUTRO  | 22  | 186 | 16067 | 1305 | 1.473102 | 0.043043 |
| greenyello | 1829 V\$CACBINDINGPROTEIN_Q6                       | 5   | 207 | 16046 | 150  | 2.61723  | 0.043045 |
| lightgreen | 431 REGULATION_OF_MAPKKK_CASCADE                   | 1   | 17  | 16236 | 42   | 22.76331 | 0.043055 |
| lightgreen | 2943 BIOCARTA_TID_PATHWAY                          | 1   | 17  | 16236 | 42   | 22.76331 | 0.043055 |
| lightgreen | 3099 BIOCARTA_TH1TH2_PATHWAY                       | 1   | 17  | 16236 | 42   | 22.76331 | 0.043055 |
| lightgreen | 3875 MODULE_478                                    | 1   | 17  | 16236 | 42   | 22.76331 | 0.043055 |
| lightgreen | 4208 REACTOME_RIP_MEDIATED_NFKB_ACTIVATION_VIA_D   | 1   | 17  | 16236 | 42   | 22.76331 | 0.043055 |
| lightgreen | 6413 SUZUKI_RESPONSE_TO_TSA_AND_DECITABINE_1A      | 1   | 17  | 16236 | 42   | 22.76331 | 0.043055 |
| lightgreen | 7568 MIKKELSEN_MCV6_LCP_WITH_H3K27ME3              | 1   | 17  | 16236 | 42   | 22.76331 | 0.043055 |
| magenta    | 8169 DURAND_STROMA_MAX_DN                          | 4   | 128 | 16125 | 167  | 3.041355 | 0.043068 |
| magenta    | 8552 GSE13411_NAIVE_VS_MEMORY_BCELL_UP             | 4   | 128 | 16125 | 167  | 3.041355 | 0.043068 |
| brown      | 8683 GSE1448_ANTI_VALPHA2_VS_VBETA5_DP_THYMOCYTI   | 32  | 175 | 16078 | 2190 | 1.357067 | 0.043115 |
| yellow     | 4105 PID_RAS_PATHWAY                               | 6   | 30  | 16223 | 1426 | 2.279523 | 0.043122 |
| yellow     | 7997 KIM_TIAL1_TARGETS                             | 6   | 30  | 16223 | 1426 | 2.279523 | 0.043122 |
| magenta    | 1916 V\$OCT1_Q5_01                                 | 5   | 186 | 16067 | 167  | 2.616219 | 0.043127 |
| magenta    | 1925 V\$MEF2_Q6_01                                 | 5   | 186 | 16067 | 167  | 2.616219 | 0.043127 |
| magenta    | 3536 MODULE_47                                     | 5   | 186 | 16067 | 167  | 2.616219 | 0.043127 |
| magenta    | 9712 GSE30083_SP1_VS_SP3_THYMOCYTE_UP              | 5   | 186 | 16067 | 167  | 2.616219 | 0.043127 |
| blue       | 1924 V\$E2F1_Q6_01                                 | 52  | 226 | 16027 | 2978 | 1.255752 | 0.043156 |
| yellow     | 9214 GSE17974_2.5H_VS_72H_IL4_AND_ANTI_IL12_ACT_CD | 25  | 199 | 16054 | 1426 | 1.431861 | 0.043157 |
| yellow     | 9343 GSE22886_IGM_MEMORY_BCELL_VS_BLOOD_PLASMA     | 25  | 199 | 16054 | 1426 | 1.431861 | 0.043157 |
| grey60     | 807 IMMUNE_SYSTEM_PROCESS                          | 3   | 289 | 15964 | 44   | 3.834461 | 0.043158 |
| lightgreen | 7522 CHIANG_LIVER_CANCER_SUBCLASS_CTNNB1_UP        | 2   | 128 | 16125 | 42   | 6.046503 | 0.043175 |
| lightcyan  | 7455 MILI_PSEUDOPODIA_HAPTOTAXIS_UP                | 5   | 505 | 15748 | 62   | 2.595497 | 0.043204 |
| blue       | 8556 GSE13411_IGM_MEMORY_BCELL_VS_PLASMA_CELL_U    | 45  | 192 | 16061 | 2978 | 1.279146 | 0.043223 |
| purple     | 8698 GSE1460_DP_THYMOCYTE_VS_NAIVE_CD4_TCELL_ADL   | 5   | 198 | 16055 | 157  | 2.614199 | 0.043236 |
| brown      | 5109 ELVIDGE_HIF1A_TARGETS_UP                      | 14  | 64  | 16189 | 2190 | 1.623445 | 0.043251 |
| brown      | 5560 DIRMEIER_LMP1_RESPONSE_EARLY                  | 14  | 64  | 16189 | 2190 | 1.623445 | 0.043251 |
| brown      | 7728 YAO_TEMPORAL_RESPONSE_TO_PROGESTERONE_CLU!    | 14  | 64  | 16189 | 2190 | 1.623445 | 0.043251 |
| turquoise  | 1647 V\$RFX1_01                                    | 65  | 209 | 16044 | 4169 | 1.212464 | 0.043299 |
| blue       | 2644 GNF2_G22P1                                    | 11  | 35  | 16218 | 2978 | 1.715274 | 0.043309 |
| blue       | 3105 BIOCARTA_PAR1_PATHWAY                         | 11  | 35  | 16218 | 2978 | 1.715274 | 0.043309 |
| blue       | 4056 PID_HIVNEFPATHWAY                             | 11  | 35  | 16218 | 2978 | 1.715274 | 0.043309 |
| blue       | 4591 REACTOME_RNA_POL_I_PROMOTER_OPENING           | 11  | 35  | 16218 | 2978 | 1.715274 | 0.043309 |
| turquoise  | 5621 MARTORIATI_MDM4_TARGETS_NEUROEPITHELIUM_DI    | 39  | 118 | 16135 | 4169 | 1.288499 | 0.043417 |
| greenyello | 6404 TRAYNOR_RETT_SYNDROM_UP                       | 2   | 36  | 16217 | 150  | 6.01963  | 0.043445 |
| greenyello | 7497 VALK_AML_WITH_FLT3_ITD                        | 2   | 36  | 16217 | 150  | 6.01963  | 0.043445 |
| black      | 10178 GSE7460_WT_VS_FOXP3_HET_ACT_TCONV_UP         | 7   | 185 | 16068 | 283  | 2.173068 | 0.043447 |
| black      | 10246 GSE9037_CTRL_VS_LPS_4H_STIM_IRAK4_KO_BMDM_L  | 7   | 185 | 16068 | 283  | 2.173068 | 0.043447 |
| blue       | 8001 FEVR_CTNNB1_TARGETS_DN                        | 112 | 526 | 15727 | 2978 | 1.162094 | 0.043459 |
| turquoise  | 439 POST_GOLGI_VESICLE_MEDIATED_TRANSPORT          | 7   | 14  | 16239 | 4169 | 1.949268 | 0.043541 |
| turquoise  | 2779 KEGG_TERPENOID_BACKBONE_BIOSYNTHESIS          | 7   | 14  | 16239 | 4169 | 1.949268 | 0.043541 |
| turquoise  | 3254 chr6q15                                       | 7   | 14  | 16239 | 4169 | 1.949268 | 0.043541 |
| turquoise  | 3270 chr2p15                                       | 7   | 14  | 16239 | 4169 | 1.949268 | 0.043541 |
| turquoise  | 5427 GILMORE_CORE_NFKB_PATHWAY                     | 7   | 14  | 16239 | 4169 | 1.949268 | 0.043541 |
| turquoise  | 5672 INAMURA_LUNG_CANCER_SCC_SUBTYPES_UP           | 7   | 14  | 16239 | 4169 | 1.949268 | 0.043541 |
| blue       | 6945 AMUNDSON_POOR_SURVIVAL_AFTER_GAMMA_RADIA      | 40  | 168 | 16085 | 2978 | 1.29945  | 0.043543 |
| lightcyan  | 5678 KIM_MYC_AMPLIFICATION_TARGETS_DN              | 2   | 87  | 16166 | 62   | 6.026326 | 0.043543 |
| lightcyan  | 6285 NEMETH_INFLAMMATORY_RESPONSE_LPS_UP           | 2   | 87  | 16166 | 62   | 6.026326 | 0.043543 |
| lightcyan  | 8376 KRAS.LUNG.BREAST_UP.V1_DN                     | 2   | 87  | 16166 | 62   | 6.026326 | 0.043543 |
| black      | 3316 chr10q26                                      | 4   | 76  | 16177 | 283  | 3.022689 | 0.043543 |

|             |                                                   |    |     |       |      |          |          |
|-------------|---------------------------------------------------|----|-----|-------|------|----------|----------|
| midnightb   | 9338 GSE22886_IGG_IGA_MEMORY_BCELL_VS_BLOOD_PLA   | 3  | 179 | 16074 | 71   | 3.836573 | 0.043545 |
| midnightb   | 10130 GSE6269_HEALTHY_VS_STREP_AUREUS_INF_PBMC_UP | 3  | 179 | 16074 | 71   | 3.836573 | 0.043545 |
| cyan        | 8759 GSE15659_RESTING_TREG_VS_NONSUPPRESSIVE_TCEL | 3  | 165 | 16088 | 77   | 3.83778  | 0.043553 |
| lightyellow | 3552 MODULE_63                                    | 2  | 164 | 16089 | 33   | 6.006282 | 0.043565 |
| lightyellow | 6554 BROWNE_HCMV_INFECTION_48HR_UP                | 2  | 164 | 16089 | 33   | 6.006282 | 0.043565 |
| lightyellow | 9841 GSE360_L_MAJOR_VS_T_GONDII_DC_DN             | 2  | 164 | 16089 | 33   | 6.006282 | 0.043565 |
| salmon      | 8536 GSE13306_TREG_RA_VS_TCONV_RA_UP              | 4  | 169 | 16084 | 127  | 3.029027 | 0.043604 |
| salmon      | 10021 GSE3982_DC_VS_EFF_MEMORY_CD4_TCELL_DN       | 4  | 169 | 16084 | 127  | 3.029027 | 0.043604 |
| turquoise   | 1720 V\$IRF7_01                                   | 63 | 202 | 16051 | 4169 | 1.21588  | 0.04366  |
| yellow      | 1 NUCLEOPLASM                                     | 32 | 267 | 15986 | 1426 | 1.366006 | 0.043661 |
| brown       | 10042 GSE3982_MAC_VS_TH1_UP                       | 34 | 188 | 16065 | 2190 | 1.342179 | 0.043662 |
| red         | 6320 PETROVA_ENDOTHELIUM_LYMPHATIC_VS_BLOOD_DN    | 9  | 144 | 16109 | 524  | 1.938573 | 0.04367  |
| brown       | 4631 REACTOME_FACTORS_INVOLVED_IN_MEGAKARYOCYTI   | 20 | 100 | 16153 | 2190 | 1.484292 | 0.043672 |
| green       | 1935 V\$VDR_Q6                                    | 24 | 207 | 16046 | 1305 | 1.443989 | 0.043678 |
| blue        | 8672 GSE14350_TREG_VS_TEFF_IN_IL2RB_KO_UP         | 46 | 197 | 16056 | 2978 | 1.274384 | 0.043754 |
| lightyellow | 962 HORMONE_METABOLIC_PROCESS                     | 1  | 22  | 16231 | 33   | 22.38705 | 0.043757 |
| lightyellow | 1175 LIGAND_DEPENDENT_NUCLEAR_RECEPTOR_ACTIVITY   | 1  | 22  | 16231 | 33   | 22.38705 | 0.043757 |
| lightyellow | 5585 SCHRAMM_INHBA_TARGETS_DN                     | 1  | 22  | 16231 | 33   | 22.38705 | 0.043757 |
| lightyellow | 6350 LIAN_NEUTROPHIL_GRANULE_CONSTITUENTS         | 1  | 22  | 16231 | 33   | 22.38705 | 0.043757 |
| lightyellow | 7702 TIAN_TNF_SIGNALING_NOT_VIA_NFKB              | 1  | 22  | 16231 | 33   | 22.38705 | 0.043757 |
| red         | 83 VACUOLE                                        | 5  | 60  | 16193 | 524  | 2.584765 | 0.043767 |
| red         | 2070 CTCAAGA,MIR-526B                             | 5  | 60  | 16193 | 524  | 2.584765 | 0.043767 |
| red         | 5674 WATTEL_AUTONOMOUS_THYROID_ADENOMA_UP         | 5  | 60  | 16193 | 524  | 2.584765 | 0.043767 |
| red         | 6025 GOTTWEIN_TARGETS_OF_KSHV_MIR_K12_11          | 5  | 60  | 16193 | 524  | 2.584765 | 0.043767 |
| lightgreen  | 2379 MORF_DMPK                                    | 2  | 129 | 16124 | 42   | 5.999631 | 0.043784 |
| lightgreen  | 5001 GARGALOVIC_RESPONSE_TO_OXIDIZED_PHOSPHOLIPID | 2  | 129 | 16124 | 42   | 5.999631 | 0.043784 |
| greenyello  | 1639 V\$ISRE_01                                   | 5  | 208 | 16045 | 150  | 2.604647 | 0.043791 |
| greenyello  | 1760 V\$STAT4_01                                  | 5  | 208 | 16045 | 150  | 2.604647 | 0.043791 |
| greenyello  | 2166 CTTTGCA,MIR-527                              | 5  | 208 | 16045 | 150  | 2.604647 | 0.043791 |
| red         | 658 MEMBRANE_ORGANIZATION_AND_BIOGENESIS          | 8  | 122 | 16131 | 524  | 2.033913 | 0.043801 |
| red         | 5165 KOKKINAKIS_METHIONINE_DEPRIVATION_48HR_UP    | 8  | 122 | 16131 | 524  | 2.033913 | 0.043801 |
| tan         | 397 PHOTOTRANSDUCTION                             | 1  | 5   | 16248 | 145  | 22.41793 | 0.043824 |
| tan         | 5844 FUJIWARA_PARK2_IN_LIVER_CANCER_DN            | 1  | 5   | 16248 | 145  | 22.41793 | 0.043824 |
| tan         | 7795 DASU_IL6_SIGNALING_DN                        | 1  | 5   | 16248 | 145  | 22.41793 | 0.043824 |
| pink        | 7612 FONTAINE_PAPILLARY_THYROID_CARCINOMA_UP      | 3  | 56  | 16197 | 228  | 3.818844 | 0.043867 |
| cyan        | 1335 TRANSCRIPTION_FACTOR_ACTIVITY                | 4  | 280 | 15973 | 77   | 3.015399 | 0.04388  |
| blue        | 1813 GATGKMRGCG_UNKNOWN                           | 17 | 61  | 16192 | 2978 | 1.520995 | 0.043889 |
| blue        | 4505 REACTOME_COSTIMULATION_BY_THE_CD28_FAMILY    | 17 | 61  | 16192 | 2978 | 1.520995 | 0.043889 |
| purple      | 8349 STK33_UP                                     | 6  | 265 | 15988 | 157  | 2.343901 | 0.043893 |
| brown       | 1286 ACTIN_BINDING                                | 15 | 70  | 16183 | 2190 | 1.590313 | 0.043904 |
| brown       | 6390 SESTO_RESPONSE_TO_UV_C8                      | 15 | 70  | 16183 | 2190 | 1.590313 | 0.043904 |
| red         | 4853 GAZDA_DIAMOND_BLACKFAN_ANEMIA_ERYTHROID_D    | 22 | 461 | 15792 | 524  | 1.480212 | 0.043907 |
| salmon      | 5785 NUYTEN_EZH2_TARGETS_DN                       | 13 | 984 | 15269 | 127  | 1.690745 | 0.043915 |
| yellow      | 6552 KANG_DOXORUBICIN_RESISTANCE_UP               | 9  | 54  | 16199 | 1426 | 1.899603 | 0.043922 |
| yellow      | 7661 GUTIERREZ_CHRONIC_LYMPHOCYTIC_LEUKEMIA_DN    | 9  | 54  | 16199 | 1426 | 1.899603 | 0.043922 |
| magenta     | 1550 V\$OCT1_01                                   | 5  | 187 | 16066 | 167  | 2.602229 | 0.043959 |
| magenta     | 1710 V\$IPF1_Q4                                   | 5  | 187 | 16066 | 167  | 2.602229 | 0.043959 |
| magenta     | 8676 GSE14350_IL2RB_KO_VS_WT_TEFF_UP              | 5  | 187 | 16066 | 167  | 2.602229 | 0.043959 |
| red         | 7043 MITSIADES_RESPONSE_TO_APLIDIN_UP             | 20 | 410 | 15843 | 524  | 1.513033 | 0.043964 |
| greenyello  | 2125 AGCTCCT,MIR-28                               | 3  | 85  | 16168 | 150  | 3.824235 | 0.043976 |
| turquoise   | 9205 GSE17974_0.5H_VS_72H_UNTREATED_IN_VITRO_CD4_ | 61 | 195 | 16058 | 4169 | 1.219542 | 0.043988 |
| turquoise   | 9740 GSE31082_CD4_VS_CD8_SP_THYMOCYTE_UP          | 61 | 195 | 16058 | 4169 | 1.219542 | 0.043988 |
| green       | 4842 KIM_RESPONSE_TO_TSA_AND_DECITABINE_UP        | 14 | 106 | 16147 | 1305 | 1.644922 | 0.044002 |
| green       | 13 PROTEINACEOUS_EXTRACELLULAR_MATRIX             | 10 | 68  | 16185 | 1305 | 1.83153  | 0.044019 |
| tan         | 3438 chr14q24                                     | 3  | 88  | 16165 | 145  | 3.821238 | 0.044073 |
| blue        | 2072 TCTGGAC,MIR-198                              | 21 | 79  | 16174 | 2978 | 1.450778 | 0.044086 |
| red         | 985 REGULATION_OF_APOPTOSIS                       | 16 | 310 | 15943 | 524  | 1.600886 | 0.044123 |
| yellow      | 1469 V\$ELK1_02                                   | 29 | 238 | 16015 | 1426 | 1.388785 | 0.044133 |
| midnightb   | 1660 V\$NFAT_Q6                                   | 3  | 180 | 16073 | 71   | 3.815258 | 0.044148 |
| midnightb   | 8738 GSE15324_ELF4_KO_VS_WT_NAIVE_CD8_TCELL_UP    | 3  | 180 | 16073 | 71   | 3.815258 | 0.044148 |



|             |                                                    |    |     |       |      |          |          |
|-------------|----------------------------------------------------|----|-----|-------|------|----------|----------|
| midnightb   | 8796 GSE15930_STIM_VS_STIM_AND_IL-12_24H_CD8_T_CE  | 3  | 180 | 16073 | 71   | 3.815258 | 0.044148 |
| purple      | 7066 SMID_BREAST_CANCER_NORMAL_LIKE_UP             | 8  | 407 | 15846 | 157  | 2.034836 | 0.04415  |
| turquoise   | 4708 REACTOME_LATE_PHASE_OF_HIV_LIFE_CYCLE         | 34 | 101 | 16152 | 4169 | 1.312379 | 0.044155 |
| brown       | 7368 AGUIRRE_PANCREATIC_CANCER_COPY_NUMBER_UP      | 49 | 286 | 15967 | 2190 | 1.271509 | 0.044164 |
| pink        | 901 HETEROCYCLE_METABOLIC_PROCESS                  | 2  | 24  | 16229 | 228  | 5.940424 | 0.044168 |
| pink        | 1340 ACTIN_FILAMENT_BINDING                        | 2  | 24  | 16229 | 228  | 5.940424 | 0.044168 |
| pink        | 3946 PID_HDAC_CLASSIII_PATHWAY                     | 2  | 24  | 16229 | 228  | 5.940424 | 0.044168 |
| pink        | 4356 REACTOME_AMINO_ACID_TRANSPORT_ACROSS_THE_I    | 2  | 24  | 16229 | 228  | 5.940424 | 0.044168 |
| pink        | 4419 REACTOME_PREFOLDIN_MEDIATED_TRANSFER_OF_SU    | 2  | 24  | 16229 | 228  | 5.940424 | 0.044168 |
| pink        | 6141 CHEN_LUNG_CANCER_SURVIVAL                     | 2  | 24  | 16229 | 228  | 5.940424 | 0.044168 |
| cyan        | 8162 LIM_MAMMARY_STEM_CELL_UP                      | 5  | 408 | 15845 | 77   | 2.586739 | 0.044191 |
| brown       | 1850 V\$ELF1_Q6                                    | 40 | 227 | 16026 | 2190 | 1.307746 | 0.044195 |
| pink        | 5183 DELYS_THYROID_CANCER_UP                       | 10 | 383 | 15870 | 228  | 1.861229 | 0.044198 |
| cyan        | 8835 GSE17721_CTRL_VS_LPS_1H_BMDM_DN               | 3  | 166 | 16087 | 77   | 3.814661 | 0.044208 |
| cyan        | 9883 GSE360_T_GONDII_VS_M_TUBERCULOSIS_MAC_DN      | 3  | 166 | 16087 | 77   | 3.814661 | 0.044208 |
| red         | 8544 GSE13306_RA_VS_UNTREATED_MEM_CD4_TCELL_UP     | 11 | 190 | 16063 | 524  | 1.795731 | 0.044218 |
| red         | 8668 GSE1432_6H_VS_24H_IFNG_MICROGLIA_UP           | 11 | 190 | 16063 | 524  | 1.795731 | 0.044218 |
| red         | 9122 GSE17721_ALL_VS_24H_PAM3CSK4_BMDM_UP          | 11 | 190 | 16063 | 524  | 1.795731 | 0.044218 |
| red         | 10026 GSE3982_DC_VS_TH1_UP                         | 11 | 190 | 16063 | 524  | 1.795731 | 0.044218 |
| turquoise   | 5095 SCIBETTA_KDM5B_TARGETS_DN                     | 26 | 74  | 16179 | 4169 | 1.369756 | 0.044234 |
| turquoise   | 811 RNA_SPLICINGVIA_TRANSESTERIFICATION_REACTIONS  | 14 | 35  | 16218 | 4169 | 1.559415 | 0.044245 |
| turquoise   | 2143 TAGAACC,MIR-182                               | 14 | 35  | 16218 | 4169 | 1.559415 | 0.044245 |
| turquoise   | 3245 chr3p24                                       | 14 | 35  | 16218 | 4169 | 1.559415 | 0.044245 |
| blue        | 9462 GSE24634_IL4_VS_CTRL_TREATED_NAIVE_CD4_TCELL_ | 41 | 173 | 16080 | 2978 | 1.293441 | 0.044249 |
| blue        | 9798 GSE360_CTRL_VS_B_MALAYI_HIGH_DOSE_DC_UP       | 41 | 173 | 16080 | 2978 | 1.293441 | 0.044249 |
| blue        | 9839 GSE360_L_DONOVANI_VS_M_TUBERCULOSIS_DC_DN     | 41 | 173 | 16080 | 2978 | 1.293441 | 0.044249 |
| red         | 600 CELLULAR_CATION_HOMEOSTASIS                    | 6  | 80  | 16173 | 524  | 2.326288 | 0.044253 |
| brown       | 6055 TARTE_PLASMA_CELL_VS_B_LYMPHOCYTE_UP          | 16 | 76  | 16177 | 2190 | 1.562413 | 0.044259 |
| brown       | 8732 GSE15215_CD2_POS_VS_NEG_PDC_UP                | 31 | 169 | 16084 | 2190 | 1.361333 | 0.044265 |
| lightyellow | 6890 FOSTER_TOLERANT_MACROPHAGE_DN                 | 3  | 391 | 15862 | 33   | 3.778889 | 0.044269 |
| blue        | 2846 KEGG_T_CELL_RECEPTOR_SIGNALING_PATHWAY        | 26 | 102 | 16151 | 2978 | 1.391176 | 0.044277 |
| blue        | 7012 AMBROSINI_FLAVOPIRIDOL_TREATMENT_TP53         | 26 | 102 | 16151 | 2978 | 1.391176 | 0.044277 |
| turquoise   | 9092 GSE17721_0.5H_VS_12H_LPS_BMDM_UP              | 59 | 188 | 16065 | 4169 | 1.223477 | 0.044278 |
| turquoise   | 9419 GSE24142_DN2_VS_DN3_THYMOCYTE_ADULT_DN        | 59 | 188 | 16065 | 4169 | 1.223477 | 0.044278 |
| turquoise   | 10042 GSE3982_MAC_VS_TH1_UP                        | 59 | 188 | 16065 | 4169 | 1.223477 | 0.044278 |
| brown       | 2089 TCTCTCC,MIR-185                               | 18 | 88  | 16165 | 2190 | 1.518026 | 0.044288 |
| green       | 3308 chr9p13                                       | 8  | 50  | 16203 | 1305 | 1.992705 | 0.044335 |
| blue        | 4953 GAL_LEUKEMIC_STEM_CELL_UP                     | 29 | 116 | 16137 | 2978 | 1.364422 | 0.044352 |
| grey60      | 9254 GSE19825_NAIVE_VS_DAY3_EFF_CD8_TCELL_UP       | 2  | 124 | 16129 | 44   | 5.957845 | 0.044358 |
| grey60      | 9386 GSE22886_IL2_VS_IL15_STIM_NKCELL_UP           | 2  | 124 | 16129 | 44   | 5.957845 | 0.044358 |
| yellow      | 1171 ELECTRON_CARRIER_ACTIVITY                     | 11 | 71  | 16182 | 1426 | 1.765828 | 0.044361 |
| brown       | 4823 LIU_PROSTATE_CANCER_UP                        | 17 | 82  | 16171 | 2190 | 1.538596 | 0.044372 |
| greenyello  | 7414 HAN_SATB1_TARGETS_UP                          | 7  | 351 | 15902 | 150  | 2.160893 | 0.044377 |
| salmon      | 7740 YAO_TEMPORAL_RESPONSE_TO_PROGESTERONE_CLU'    | 4  | 170 | 16083 | 127  | 3.011209 | 0.044395 |
| lightgreen  | 4825 LIU_SOX4_TARGETS_UP                           | 2  | 130 | 16123 | 42   | 5.95348  | 0.044397 |
| lightgreen  | 5645 MOHANKUMAR_TLX1_TARGETS_DN                    | 2  | 130 | 16123 | 42   | 5.95348  | 0.044397 |
| salmon      | 3575 MODULE_87                                     | 2  | 43  | 16210 | 127  | 5.95239  | 0.044422 |
| salmon      | 4226 REACTOME_NOTCH1_INTRACELLULAR_DOMAIN_REGU     | 2  | 43  | 16210 | 127  | 5.95239  | 0.044422 |
| salmon      | 5367 CHOI_ATL_STAGE_PREDICTOR                      | 2  | 43  | 16210 | 127  | 5.95239  | 0.044422 |
| purple      | 4890 FULCHER_INFLAMMATORY_RESPONSE_LLECTIN_VS_LPS  | 10 | 558 | 15695 | 157  | 1.855238 | 0.044438 |
| lightcyan   | 7860 CHICAS_RB1_TARGETS_SENESCENT                  | 5  | 509 | 15744 | 62   | 2.5751   | 0.044439 |
| pink        | 1708 V\$TITF1_Q3                                   | 6  | 183 | 16070 | 228  | 2.337216 | 0.044464 |
| pink        | 8900 GSE17721_CTRL_VS_GARDIQUIMOD_2H_BMDM_UP       | 6  | 183 | 16070 | 228  | 2.337216 | 0.044464 |
| pink        | 9297 GSE20715_0H_VS_24H_OZONE_TLR4_KO_LUNG_DN      | 6  | 183 | 16070 | 228  | 2.337216 | 0.044464 |
| tan         | 1646 V\$MIF1_01                                    | 4  | 149 | 16104 | 145  | 3.009118 | 0.044506 |
| black       | 6223 PENG_RAPAMYCIN_RESPONSE_UP                    | 7  | 186 | 16067 | 283  | 2.161385 | 0.044506 |
| black       | 9285 GSE20715_WT_VS_TLR4_KO_24H_OZONE_LUNG_DN      | 7  | 186 | 16067 | 283  | 2.161385 | 0.044506 |
| lightgreen  | 3534 MODULE_45                                     | 4  | 520 | 15733 | 42   | 2.97674  | 0.044519 |
| magenta     | 5086 ZHOU_INFLAMMATORY_RESPONSE_FIMA_DN            | 6  | 250 | 16003 | 167  | 2.33576  | 0.044544 |
| salmon      | 7455 MILI_PSEUDOPODIA_HAPTOTAXIS_UP                | 8  | 505 | 15748 | 127  | 2.027349 | 0.044581 |

|            |       |                                                |    |     |       |      |          |          |
|------------|-------|------------------------------------------------|----|-----|-------|------|----------|----------|
| cyan       | 3926  | PID_SMAD2_3NUCLEARPATHWAY                      | 2  | 71  | 16182 | 77   | 5.945857 | 0.044621 |
| cyan       | 5299  | MCBRYAN_PUBERTAL_BREAST_6_7WK_DN               | 2  | 71  | 16182 | 77   | 5.945857 | 0.044621 |
| cyan       | 5855  | FRIDMAN_SENESCENCE_UP                          | 2  | 71  | 16182 | 77   | 5.945857 | 0.044621 |
| cyan       | 7646  | BOYLAN_MULTIPLE_MYELOMA_PCA3_UP                | 2  | 71  | 16182 | 77   | 5.945857 | 0.044621 |
| midnightb  | 5969  | MORI_PRE_BI_LYMPHOCYTE_DN                      | 2  | 77  | 16176 | 71   | 5.945857 | 0.044621 |
| blue       | 4477  | REACTOME_ELONGATION_ARREST_AND_RECOVERY        | 10 | 31  | 16222 | 2978 | 1.760545 | 0.044644 |
| blue       | 4481  | REACTOME_CD28_CO_STIMULATION                   | 10 | 31  | 16222 | 2978 | 1.760545 | 0.044644 |
| blue       | 7209  | HUPER_BREAST_BASAL_VS_LUMINAL_UP               | 10 | 31  | 16222 | 2978 | 1.760545 | 0.044644 |
| blue       | 582   | TRNA_METABOLIC_PROCESS                         | 7  | 19  | 16234 | 2978 | 2.010728 | 0.044675 |
| blue       | 4109  | PID_EPHA2_FWDPATHWAY                           | 7  | 19  | 16234 | 2978 | 2.010728 | 0.044675 |
| blue       | 4564  | REACTOME_SYNTHESIS_AND_INTERCONVERSION_OF_I    | 7  | 19  | 16234 | 2978 | 2.010728 | 0.044675 |
| blue       | 6596  | VISALA_AGING_LYMPHOCYTE_DN                     | 7  | 19  | 16234 | 2978 | 2.010728 | 0.044675 |
| blue       | 8135  | MIZUSHIMA_AUTOPHAGOSOME_FORMATION              | 7  | 19  | 16234 | 2978 | 2.010728 | 0.044675 |
| salmon     | 2429  | MORF_PAPSS1                                    | 3  | 101 | 16152 | 127  | 3.801279 | 0.044677 |
| salmon     | 4708  | REACTOME_LATE_PHASE_OF_HIV_LIFE_CYCLE          | 3  | 101 | 16152 | 127  | 3.801279 | 0.044677 |
| pink       | 874   | ION_HOMEOSTASIS                                | 4  | 95  | 16158 | 228  | 3.001477 | 0.044695 |
| blue       | 1785  | V\$EFC_Q6                                      | 48 | 207 | 16046 | 2978 | 1.265551 | 0.044722 |
| red        | 5849  | RICKMAN_TUMOR_DIFFERENTIATED_WELL_VS_MODEI     | 7  | 101 | 16152 | 524  | 2.149705 | 0.044738 |
| midnightb  | 2162  | TGTGTGA,MIR-377                                | 3  | 181 | 16072 | 71   | 3.794179 | 0.044756 |
| lightgreen | 6482  | CUI_TCF21_TARGETS_2_DN                         | 5  | 759 | 15494 | 42   | 2.54925  | 0.044792 |
| magenta    | 1624  | V\$NKX25_02                                    | 5  | 188 | 16065 | 167  | 2.588387 | 0.0448   |
| magenta    | 9419  | GSE24142_DN2_VS_DN3_THYMOCYTE_ADULT_DN         | 5  | 188 | 16065 | 167  | 2.588387 | 0.0448   |
| purple     | 692   | G_PROTEIN_SIGNALING_COUPLED_TO_CAMP_NUCLEO     | 2  | 35  | 16218 | 157  | 5.91556  | 0.044813 |
| purple     | 3162  | chr2q32                                        | 2  | 35  | 16218 | 157  | 5.91556  | 0.044813 |
| purple     | 4045  | PID_BMPPATHWAY                                 | 2  | 35  | 16218 | 157  | 5.91556  | 0.044813 |
| purple     | 4314  | REACTOME_GAB1_SIGNALOSOME                      | 2  | 35  | 16218 | 157  | 5.91556  | 0.044813 |
| purple     | 5935  | AMIT_EGF_RESPONSE_60_MCF10A                    | 2  | 35  | 16218 | 157  | 5.91556  | 0.044813 |
| purple     | 6260  | STOSSI_RESPONSE_TO ESTRADIOL                   | 2  | 35  | 16218 | 157  | 5.91556  | 0.044813 |
| purple     | 7486  | VALK_AML_CLUSTER_9                             | 2  | 35  | 16218 | 157  | 5.91556  | 0.044813 |
| purple     | 7884  | FIGUEROA_AML_METHYLATION_CLUSTER_3_DN          | 2  | 35  | 16218 | 157  | 5.91556  | 0.044813 |
| yellow     | 1142  | HYDROLASE_ACTIVITY_ACTING_ON_GLYCOSYL_BONDS    | 7  | 38  | 16215 | 1426 | 2.099561 | 0.044823 |
| lightcyan  | 366   | NEGATIVE_REGULATION_OF_HYDROLASE_ACTIVITY      | 1  | 12  | 16241 | 62   | 21.84543 | 0.044843 |
| lightcyan  | 570   | DEFENSE_RESPONSE_TO_VIRUS                      | 1  | 12  | 16241 | 62   | 21.84543 | 0.044843 |
| lightcyan  | 1440  | PHOSPHOLIPID_TRANSPORTER_ACTIVITY              | 1  | 12  | 16241 | 62   | 21.84543 | 0.044843 |
| lightcyan  | 4214  | REACTOME_TRAFFICKING_AND_PROCESSING_OF_ENDO    | 1  | 12  | 16241 | 62   | 21.84543 | 0.044843 |
| lightcyan  | 5831  | CAFFAREL_RESPONSE_TO_THC_24HR_3_DN             | 1  | 12  | 16241 | 62   | 21.84543 | 0.044843 |
| lightcyan  | 5887  | TAGHAVI_NEOPLASTIC_TRANSFORMATION              | 1  | 12  | 16241 | 62   | 21.84543 | 0.044843 |
| lightcyan  | 6168  | KUROKAWA_LIVER_CANCER_CHEMOTHERAPY_UP          | 1  | 12  | 16241 | 62   | 21.84543 | 0.044843 |
| lightcyan  | 6907  | KYNG_ENVIRONMENTAL_STRESS_RESPONSE_NOT_BY_     | 1  | 12  | 16241 | 62   | 21.84543 | 0.044843 |
| lightcyan  | 7907  | PHESE_TARGETS_OF_APC_AND_MBD2_DN               | 1  | 12  | 16241 | 62   | 21.84543 | 0.044843 |
| lightcyan  | 8040  | WANG_THOC1_TARGETS_DN                          | 1  | 12  | 16241 | 62   | 21.84543 | 0.044843 |
| lightcyan  | 7371  | SWEET_LUNG_CANCER_KRAS_DN                      | 4  | 351 | 15902 | 62   | 2.987409 | 0.044849 |
| cyan       | 8679  | GSE1448_CTRL_VS_ANTI_VALPHA2_DP_THYMOCYTE_I    | 3  | 167 | 16086 | 77   | 3.791819 | 0.044868 |
| cyan       | 8741  | GSE15324_ELF4_KO_VS_WT_ACTIVATED_CD8_TCELL_I   | 3  | 167 | 16086 | 77   | 3.791819 | 0.044868 |
| cyan       | 8839  | GSE17721_CTRL_VS_LPS_4H_BMDM_DN                | 3  | 167 | 16086 | 77   | 3.791819 | 0.044868 |
| cyan       | 9517  | GSE2706_R848_VS_R848_AND_LPS_8H_STIM_DC_DN     | 3  | 167 | 16086 | 77   | 3.791819 | 0.044868 |
| magenta    | 2036  | GCTCTTG,MIR-335                                | 3  | 77  | 16176 | 167  | 3.791819 | 0.044868 |
| purple     | 1732  | V\$AP2REP_01                                   | 4  | 138 | 16115 | 157  | 3.000646 | 0.044886 |
| brown      | 8462  | GSE11864_UNTREATED_VS_CSF1_IFNG_IN_MAC_UP      | 33 | 182 | 16071 | 2190 | 1.34565  | 0.044886 |
| brown      | 8776  | GSE15930_NAIVE_VS_24H_IN_VITRO_STIM_CD8_TCELI  | 33 | 182 | 16071 | 2190 | 1.34565  | 0.044886 |
| brown      | 9100  | GSE17721_12H_VS_24H_LPS_BMDM_UP                | 33 | 182 | 16071 | 2190 | 1.34565  | 0.044886 |
| brown      | 9533  | GSE27786_LSK_VS_CD4_TCELL_DN                   | 33 | 182 | 16071 | 2190 | 1.34565  | 0.044886 |
| brown      | 10035 | GSE3982_MAC_VS_BASOPHIL_DN                     | 33 | 182 | 16071 | 2190 | 1.34565  | 0.044886 |
| brown      | 10078 | GSE3982_BASOPHIL_VS_TH1_UP                     | 33 | 182 | 16071 | 2190 | 1.34565  | 0.044886 |
| blue       | 7363  | VANTVEER_BREAST_CANCER_ESR1_UP                 | 37 | 154 | 16099 | 2978 | 1.311263 | 0.044911 |
| turquoise  | 9076  | GSE17721_LPS_VS_GARDIQUIMOD_1H_BMDM_UP         | 51 | 160 | 16093 | 4169 | 1.242659 | 0.044935 |
| red        | 1756  | V\$BACH1_01                                    | 12 | 214 | 16039 | 524  | 1.739281 | 0.044974 |
| green      | 1224  | PHOSPHORIC_ESTER_HYDROLASE_ACTIVITY            | 17 | 136 | 16117 | 1305 | 1.556801 | 0.044989 |
| green      | 9168  | GSE17974_CTRL_VS_ACT_IL4_AND_ANTI_IL12_0.5H_CI | 17 | 136 | 16117 | 1305 | 1.556801 | 0.044989 |
| grey60     | 8038  | KATSANOUELAVL1_TARGETS_DN                      | 2  | 125 | 16128 | 44   | 5.910182 | 0.045003 |

|             |                                                    |    |     |       |      |          |          |
|-------------|----------------------------------------------------|----|-----|-------|------|----------|----------|
| lightyellow | 1400 ENZYME_BINDING                                | 2  | 167 | 16086 | 33   | 5.898385 | 0.04501  |
| magenta     | 3741 MODULE_280                                    | 2  | 33  | 16220 | 167  | 5.898385 | 0.04501  |
| blue        | 1380 INORGANIC_CATION_TRANSMEMBRANE_TRANSPORTE     | 14 | 48  | 16205 | 2978 | 1.591826 | 0.045013 |
| blue        | 2558 GCM_SUPT4H1                                   | 14 | 48  | 16205 | 2978 | 1.591826 | 0.045013 |
| blue        | 3346 chr6q25                                       | 14 | 48  | 16205 | 2978 | 1.591826 | 0.045013 |
| blue        | 5638 OXFORD_RALA_OR_RALB_TARGETS_UP                | 14 | 48  | 16205 | 2978 | 1.591826 | 0.045013 |
| blue        | 6307 PARK_HSC_AND_MULTIPOTENT_PROGENITORS          | 14 | 48  | 16205 | 2978 | 1.591826 | 0.045013 |
| blue        | 7300 CHAUHAN_RESPONSE_TO_METHOXYESTRADIOL_UP       | 14 | 48  | 16205 | 2978 | 1.591826 | 0.045013 |
| purple      | 4167 REACTOME_MEIOSIS                              | 3  | 82  | 16171 | 157  | 3.787401 | 0.045025 |
| pink        | 1419 TRANSMEMBRANE_TRANSPORTER_ACTIVITY            | 8  | 281 | 15972 | 228  | 2.029469 | 0.045026 |
| blue        | 7265 BOYLAN_MULTIPLE_MYELOMA_C_D_UP                | 33 | 135 | 16118 | 2978 | 1.334102 | 0.045031 |
| black       | 3383 chr20q13                                      | 6  | 148 | 16105 | 283  | 2.328288 | 0.045048 |
| grey60      | 1120 HEPARIN_BINDING                               | 1  | 17  | 16236 | 44   | 21.72861 | 0.045061 |
| grey60      | 1451 ANTIOXIDANT_ACTIVITY                          | 1  | 17  | 16236 | 44   | 21.72861 | 0.045061 |
| grey60      | 3259 chr3p26                                       | 1  | 17  | 16236 | 44   | 21.72861 | 0.045061 |
| grey60      | 5047 TONKS_TARGETS_OF_RUNX1_RUNX1T1_FUSION_GRAN    | 1  | 17  | 16236 | 44   | 21.72861 | 0.045061 |
| pink        | 8209 CYCLIN_D1_KE_V1_DN                            | 5  | 138 | 16115 | 228  | 2.582793 | 0.045088 |
| turquoise   | 2205 TTCYRGAA_UNKNOWN                              | 80 | 263 | 15990 | 4169 | 1.185867 | 0.045101 |
| blue        | 7672 KYNG_WERNER_SYNDROM_AND_NORMAL_AGING_DN       | 49 | 212 | 16041 | 2978 | 1.261447 | 0.045161 |
| red         | 991 REGULATION_OF_PROGRAMMED_CELL_DEATH            | 16 | 311 | 15942 | 524  | 1.595739 | 0.045198 |
| greenyello  | 2839 KEGG_TOLL_LIKE_RECEPTOR_SIGNALING_PATHWAY     | 3  | 86  | 16167 | 150  | 3.779767 | 0.045268 |
| greenyello  | 8371 KRAS.BREAST_UP.V1_UP                          | 3  | 86  | 16167 | 150  | 3.779767 | 0.045268 |
| brown       | 8840 GSE17721_CTRL_VS_LPS_6H_BMDM_UP               | 35 | 195 | 16058 | 2190 | 1.332057 | 0.045284 |
| brown       | 9210 GSE17974_0.5H_VS_72H_IL4_AND_ANTI_IL12_ACT_CD | 35 | 195 | 16058 | 2190 | 1.332057 | 0.045284 |
| brown       | 9897 GSE36392_EOSINOPHIL_VS_MAC_IL25_TREATED_LUNC  | 35 | 195 | 16058 | 2190 | 1.332057 | 0.045284 |
| brown       | 9996 GSE3982_MAST_CELL_VS_NEUTROPHIL_UP            | 35 | 195 | 16058 | 2190 | 1.332057 | 0.045284 |
| brown       | 10040 GSE3982_MAC_VS_NKCELL_UP                     | 35 | 195 | 16058 | 2190 | 1.332057 | 0.045284 |
| red         | 1076 HYDRO_LYASE_ACTIVITY                          | 3  | 25  | 16228 | 524  | 3.722061 | 0.045295 |
| red         | 3081 BIOCARTA_NKT_PATHWAY                          | 3  | 25  | 16228 | 524  | 3.722061 | 0.045295 |
| red         | 6392 GENTILE_UV_RESPONSE_CLUSTER_D9                | 3  | 25  | 16228 | 524  | 3.722061 | 0.045295 |
| greenyello  | 1754 V\$STAT5A_03                                  | 5  | 210 | 16043 | 150  | 2.579841 | 0.045306 |
| greenyello  | 591 NEUROPEPTIDE_SIGNALING_PATHWAY                 | 1  | 5   | 16248 | 150  | 21.67067 | 0.045307 |
| greenyello  | 3136 chr1p11                                       | 1  | 5   | 16248 | 150  | 21.67067 | 0.045307 |
| greenyello  | 3280 chr5q                                         | 1  | 5   | 16248 | 150  | 21.67067 | 0.045307 |
| greenyello  | 4778 REACTOME_APOBEC3G_MEDIATED_RESISTANCE_TO_H    | 1  | 5   | 16248 | 150  | 21.67067 | 0.045307 |
| greenyello  | 5763 GALIE_TUMOR_STEMNESS_GENES                    | 1  | 5   | 16248 | 150  | 21.67067 | 0.045307 |
| greenyello  | 7288 JU_AGING_TERC_TARGETS_DN                      | 1  | 5   | 16248 | 150  | 21.67067 | 0.045307 |
| greenyello  | 7448 CHEOK_RESPONSE_TO_MERCAPTOPYRIMIDINE_AND_HD_N | 1  | 5   | 16248 | 150  | 21.67067 | 0.045307 |
| brown       | 3423 chr7q32                                       | 9  | 36  | 16217 | 2190 | 1.855365 | 0.045349 |
| brown       | 4431 REACTOME_MUSCLE_CONTRACTION                   | 9  | 36  | 16217 | 2190 | 1.855365 | 0.045349 |
| brown       | 4876 TURASHVILI_BREAST_DUCTAL_CARCINOMA_VS_DUCTA   | 9  | 36  | 16217 | 2190 | 1.855365 | 0.045349 |
| brown       | 6657 GEISS_RESPONSE_TO_DSRNA_UP                    | 9  | 36  | 16217 | 2190 | 1.855365 | 0.045349 |
| brown       | 7155 NAKAMURA_METASTASIS_MODEL_DN                  | 9  | 36  | 16217 | 2190 | 1.855365 | 0.045349 |
| midnightb   | 8834 GSE17721_CTRL_VS_LPS_1H_BMDM_UP               | 3  | 182 | 16071 | 71   | 3.773332 | 0.045368 |
| midnightb   | 9654 GSE29618_BCELL_VS_MONOCYTE_UP                 | 3  | 182 | 16071 | 71   | 3.773332 | 0.045368 |
| midnightb   | 9805 GSE360_CTRL_VS_L_DONOVANI_MAC_DN              | 3  | 182 | 16071 | 71   | 3.773332 | 0.045368 |
| yellow      | 9437 GSE24634_NAIVE_CD4_TCELL_VS_DAY7_IL4_CONV_TR  | 25 | 200 | 16053 | 1426 | 1.424702 | 0.045381 |
| red         | 8055 PEDERSEN_METASTASIS_BY_ERBB2_ISOFORM_7        | 18 | 361 | 15892 | 524  | 1.546563 | 0.045394 |
| turquoise   | 2612 GNF2_APEX1                                    | 31 | 91  | 16162 | 4169 | 1.328073 | 0.045394 |
| turquoise   | 4803 PYEON_HP_V_POSITIVE_TUMORS_UP                 | 31 | 91  | 16162 | 4169 | 1.328073 | 0.045394 |
| lightyellow | 3527 MODULE_38                                     | 3  | 395 | 15858 | 33   | 3.740621 | 0.045398 |
| red         | 4482 REACTOME_GPCR_DOWNSTREAM_SIGNALING            | 17 | 336 | 15917 | 524  | 1.569321 | 0.045402 |
| red         | 5657 GRUETZMANN_PANCREATIC_CANCER_UP               | 17 | 336 | 15917 | 524  | 1.569321 | 0.045402 |
| greenyello  | 8769 GSE15750_WT_VS_TRAF6KO_DAY10_EFF_CD8_TCELL_   | 4  | 145 | 16108 | 150  | 2.989057 | 0.04542  |
| brown       | 10096 GSE3982_NKCELL_VS_TH1_UP                     | 30 | 163 | 16090 | 2190 | 1.365913 | 0.045429 |
| pink        | 8491 GSE11924_TH2_VS_TH17_CD4_TCELL_DN             | 6  | 184 | 16069 | 228  | 2.324514 | 0.045449 |
| lightyellow | 654 PROTEOLYSIS                                    | 2  | 168 | 16085 | 33   | 5.863276 | 0.045495 |
| lightyellow | 6185 OKUMURA_INFLAMMATORY_RESPONSE_LPS             | 2  | 168 | 16085 | 33   | 5.863276 | 0.045495 |
| lightyellow | 9368 GSE22886_NAIVE_BCELL_VS_MONOCYTE_UP           | 2  | 168 | 16085 | 33   | 5.863276 | 0.045495 |
| lightyellow | 9725 GSE30962_PRIMARY_VS_SECONDARY_CHRONIC_LCMV    | 2  | 168 | 16085 | 33   | 5.863276 | 0.045495 |

|             |                                                   |    |     |       |      |          |          |
|-------------|---------------------------------------------------|----|-----|-------|------|----------|----------|
| lightyellow | 9850 GSE360_T_GONDII_VS_B_MALAYI_LOW_DOSE_DC_UP   | 2  | 168 | 16085 | 33   | 5.863276 | 0.045495 |
| pink        | 7433 HSIAO_HOUSEKEEPING_GENES                     | 10 | 385 | 15868 | 228  | 1.851561 | 0.045501 |
| blue        | 4566 REACTOME_RNA_POL_I_RNA_POL_III_AND_MITOCHOI  | 24 | 93  | 16160 | 2978 | 1.408436 | 0.04551  |
| blue        | 3697 MODULE_219                                   | 9  | 27  | 16226 | 2978 | 1.81923  | 0.045527 |
| blue        | 4155 REACTOME_DAG_AND_IP3_SIGNALING               | 9  | 27  | 16226 | 2978 | 1.81923  | 0.045527 |
| blue        | 4768 REACTOME_EXTENSION_OF_TELOMERES              | 9  | 27  | 16226 | 2978 | 1.81923  | 0.045527 |
| blue        | 7829 WANG_METASTASIS_OF_BREAST_CANCER_ESR1_DN     | 9  | 27  | 16226 | 2978 | 1.81923  | 0.045527 |
| lightgreen  | 2948 BIOCARTA_GCR_PATHWAY                         | 1  | 18  | 16235 | 42   | 21.49868 | 0.04553  |
| lightgreen  | 3148 chr12q15                                     | 1  | 18  | 16235 | 42   | 21.49868 | 0.04553  |
| lightgreen  | 4328 REACTOME_FATTY_ACYL_COA_BIOSYNTHESIS         | 1  | 18  | 16235 | 42   | 21.49868 | 0.04553  |
| lightgreen  | 4779 REACTOME_GAP_JUNCTION_TRAFFICKING            | 1  | 18  | 16235 | 42   | 21.49868 | 0.04553  |
| lightgreen  | 4834 DAVICIONI_PAX_FOXO1_SIGNATURE_IN_ARMS_DN     | 1  | 18  | 16235 | 42   | 21.49868 | 0.04553  |
| lightgreen  | 5838 SUH_COEXPRESSED_WITH_ID1_AND_ID2_UP          | 1  | 18  | 16235 | 42   | 21.49868 | 0.04553  |
| lightgreen  | 7607 KUROZUMI_RESPONSE_TO_ONCOCYTIC_VIRUS_AND_C   | 1  | 18  | 16235 | 42   | 21.49868 | 0.04553  |
| lightgreen  | 7994 BILANGES_SERUM_SENSITIVE_VIA_TSC1            | 1  | 18  | 16235 | 42   | 21.49868 | 0.04553  |
| cyan        | 9850 GSE360_T_GONDII_VS_B_MALAYI_LOW_DOSE_DC_UP   | 3  | 168 | 16085 | 77   | 3.769249 | 0.045533 |
| blue        | 8677 GSE14350_IL2RB_KO_VS_WT_TEFF_DN              | 43 | 183 | 16070 | 2978 | 1.282408 | 0.045539 |
| blue        | 8922 GSE17721_LPS_VS_POLYIC_8H_BMDM_UP            | 43 | 183 | 16070 | 2978 | 1.282408 | 0.045539 |
| blue        | 9471 GSE25087_TREG_VS_TCONV_ADULT_DN              | 43 | 183 | 16070 | 2978 | 1.282408 | 0.045539 |
| pink        | 1573 V\$AP1FJ_Q2                                  | 7  | 232 | 16021 | 228  | 2.150843 | 0.04554  |
| pink        | 7689 DANG_REGULATED_BY_MYC_DN                     | 7  | 232 | 16021 | 228  | 2.150843 | 0.04554  |
| turquoise   | 5516 FARMER_BREAST_CANCER_CLUSTER_2               | 13 | 32  | 16221 | 4169 | 1.583781 | 0.045554 |
| turquoise   | 5832 CAFFAREL_RESPONSE_TO_THC_24HR_5_UP           | 13 | 32  | 16221 | 4169 | 1.583781 | 0.045554 |
| red         | 1228 KINASE_REGULATOR_ACTIVITY                    | 4  | 42  | 16211 | 524  | 2.954017 | 0.045573 |
| red         | 3133 chr2p22                                      | 4  | 42  | 16211 | 524  | 2.954017 | 0.045573 |
| red         | 3350 chr9q21                                      | 4  | 42  | 16211 | 524  | 2.954017 | 0.045573 |
| red         | 3574 MODULE_86                                    | 4  | 42  | 16211 | 524  | 2.954017 | 0.045573 |
| red         | 6559 BROWNE_HCMV_INFECTION_8HR_DN                 | 4  | 42  | 16211 | 524  | 2.954017 | 0.045573 |
| red         | 3701 MODULE_223                                   | 8  | 123 | 16130 | 524  | 2.017377 | 0.04559  |
| red         | 5338 DARWICHE_SQUAMOUS_CELL_CARCINOMA_UP          | 8  | 123 | 16130 | 524  | 2.017377 | 0.04559  |
| red         | 8317 RB_P130_DN.V1_DN                             | 8  | 123 | 16130 | 524  | 2.017377 | 0.04559  |
| red         | 8329 IL21_UP.V1_DN                                | 8  | 123 | 16130 | 524  | 2.017377 | 0.04559  |
| purple      | 5164 COLDREN_GEFITINIB_RESISTANCE_DN              | 5  | 201 | 16052 | 157  | 2.575181 | 0.04561  |
| green       | 6392 GENTILE_UV_RESPONSE_CLUSTER_D9               | 5  | 25  | 16228 | 1305 | 2.490881 | 0.045615 |
| red         | 9721 GSE30083_SP3_VS_SP4_THYMOCYTE_DN             | 11 | 191 | 16062 | 524  | 1.786329 | 0.045624 |
| lightgreen  | 7345 RUIZ_TNC_TARGETS_UP                          | 2  | 132 | 16121 | 42   | 5.863276 | 0.045632 |
| magenta     | 1517 V\$PBX1_01                                   | 5  | 189 | 16064 | 167  | 2.574692 | 0.045652 |
| grey60      | 5034 MULLIGHAN_NPM1_MUTATED_SIGNATURE_2_UP        | 2  | 126 | 16127 | 44   | 5.863276 | 0.045652 |
| greenyello  | 3054 BIOCARTA_CHREBP2_PATHWAY                     | 2  | 37  | 16216 | 150  | 5.856937 | 0.045656 |
| greenyello  | 6437 WEIGEL_OXIDATIVE_STRESS_BY_HNE_AND_H2O2      | 2  | 37  | 16216 | 150  | 5.856937 | 0.045656 |
| greenyello  | 6988 FUJII_YBX1_TARGETS_UP                        | 2  | 37  | 16216 | 150  | 5.856937 | 0.045656 |
| pink        | 7846 KIM_ALL_DISORDERS_OLIGODENDROCYTE_NUMBER_C   | 16 | 717 | 15536 | 228  | 1.590741 | 0.045659 |
| brown       | 5332 DARWICHE_SKIN_TUMOR_PROMOTER_UP              | 23 | 119 | 16134 | 2190 | 1.4344   | 0.045671 |
| blue        | 133 ORGANELLE_OUTER_MEMBRANE                      | 8  | 23  | 16230 | 2978 | 1.898327 | 0.045683 |
| blue        | 645 POSITIVE_REGULATION_OF_TRANSCRIPTION_FACTOR_  | 8  | 23  | 16230 | 2978 | 1.898327 | 0.045683 |
| blue        | 4990 GARGALOVIC_RESPONSE_TO_OXIDIZED_PHOSPHOLIPID | 8  | 23  | 16230 | 2978 | 1.898327 | 0.045683 |
| yellow      | 840 NEGATIVE_REGULATION_OF_BINDING                | 4  | 16  | 16237 | 1426 | 2.849404 | 0.045699 |
| yellow      | 1236 RNA_POLYMERASE_ACTIVITY                      | 4  | 16  | 16237 | 1426 | 2.849404 | 0.045699 |
| yellow      | 2726 KEGG_STEROID_BIOSYNTHESIS                    | 4  | 16  | 16237 | 1426 | 2.849404 | 0.045699 |
| yellow      | 3089 BIOCARTA_SPRY_PATHWAY                        | 4  | 16  | 16237 | 1426 | 2.849404 | 0.045699 |
| yellow      | 4233 REACTOME_ARMS_MEDIATED_ACTIVATION            | 4  | 16  | 16237 | 1426 | 2.849404 | 0.045699 |
| lightyellow | 2894 KEGG_ASTHMA                                  | 1  | 23  | 16230 | 33   | 21.4137  | 0.045701 |
| lightyellow | 2952 BIOCARTA_CELLCYCLE_PATHWAY                   | 1  | 23  | 16230 | 33   | 21.4137  | 0.045701 |
| lightyellow | 3318 chr15q23                                     | 1  | 23  | 16230 | 33   | 21.4137  | 0.045701 |
| lightyellow | 3957 PID_INTEGRIN_CS_PATHWAY                      | 1  | 23  | 16230 | 33   | 21.4137  | 0.045701 |
| lightyellow | 4169 REACTOME_G0_AND_EARLY_G1                     | 1  | 23  | 16230 | 33   | 21.4137  | 0.045701 |
| lightyellow | 5318 ZIRN_TRETINOIN_RESPONSE_WT1_UP               | 1  | 23  | 16230 | 33   | 21.4137  | 0.045701 |
| lightyellow | 6919 KONDO_COLON_CANCER_HCP_WITH_H3K27ME1         | 1  | 23  | 16230 | 33   | 21.4137  | 0.045701 |
| lightyellow | 7783 DAZARD_UV_RESPONSE_CLUSTER_G24               | 1  | 23  | 16230 | 33   | 21.4137  | 0.045701 |
| purple      | 3510 MODULE_18                                    | 8  | 410 | 15843 | 157  | 2.019947 | 0.045749 |

|             |                                                    |     |      |       |      |          |          |
|-------------|----------------------------------------------------|-----|------|-------|------|----------|----------|
| cyan        | 7945 KIM_GLIS2_TARGETS_UP                          | 2   | 72   | 16181 | 77   | 5.863276 | 0.045758 |
| black       | 3985 PID_LKB1_PATHWAY                              | 3   | 46   | 16207 | 283  | 3.745506 | 0.045794 |
| red         | 7253 LEE_LIVER_CANCER_SURVIVAL_DN                  | 10  | 168  | 16085 | 524  | 1.84626  | 0.045801 |
| red         | 8894 GSE17721_CTRL_VS_CPG_24H_BMDM_UP              | 10  | 168  | 16085 | 524  | 1.84626  | 0.045801 |
| red         | 9797 GSE360_CTRL_VS_T_GONDII_DC_DN                 | 10  | 168  | 16085 | 524  | 1.84626  | 0.045801 |
| yellow      | 4124 REACTOME_RNA_POL_III_TRANSCRIPTION_INITIATION | 5   | 23   | 16230 | 1426 | 2.477743 | 0.045817 |
| blue        | 3202 chr12p                                        | 3   | 5    | 16248 | 2978 | 3.274614 | 0.04582  |
| blue        | 3294 chr4q                                         | 3   | 5    | 16248 | 2978 | 3.274614 | 0.04582  |
| blue        | 5464 MYLLYKANGAS_AMPLIFICATION_HOT_SPOT_25         | 3   | 5    | 16248 | 2978 | 3.274614 | 0.04582  |
| blue        | 5468 MYLLYKANGAS_AMPLIFICATION_HOT_SPOT_29         | 3   | 5    | 16248 | 2978 | 3.274614 | 0.04582  |
| blue        | 7634 LOPEZ_MESOTHELIOMA_SURVIVAL_OVERALL_UP        | 3   | 5    | 16248 | 2978 | 3.274614 | 0.04582  |
| blue        | 8068 IM_SREBF1A_TARGETS                            | 3   | 5    | 16248 | 2978 | 3.274614 | 0.04582  |
| pink        | 416 CELLULAR_PROTEIN_CATABOLIC_PROCESS             | 3   | 57   | 16196 | 228  | 3.751847 | 0.045841 |
| pink        | 6631 WEIGEL_OXIDATIVE_STRESS_BY_HNE_AND_TBH        | 3   | 57   | 16196 | 228  | 3.751847 | 0.045841 |
| grey60      | 2234 CAGCTG_V\$AP4_Q5                              | 7   | 1231 | 15022 | 44   | 2.100491 | 0.045851 |
| turquoise   | 9600 GSE27786_NKCELL_VS_ERYTHROBLAST_UP            | 62  | 199  | 16054 | 4169 | 1.21462  | 0.045926 |
| turquoise   | 10228 GSE9006_HEALTHY_VS_TYPE_1_DIABETES_PBMC_4MC  | 62  | 199  | 16054 | 4169 | 1.21462  | 0.045926 |
| turquoise   | 3507 MODULE_15                                     | 101 | 339  | 15914 | 4169 | 1.161511 | 0.045951 |
| blue        | 415 POSITIVE_REGULATION_OF_RNA_METABOLIC_PROCES    | 27  | 107  | 16146 | 2978 | 1.377174 | 0.045954 |
| blue        | 1776 V\$ARNT_02                                    | 51  | 222  | 16031 | 2978 | 1.253794 | 0.045957 |
| lightyellow | 1542 V\$GATA1_04                                   | 2   | 169  | 16084 | 33   | 5.828582 | 0.045983 |
| midnightb   | 8456 GSE11057_NAIVE_VS_MEMORY_CD4_TCELL_UP         | 3   | 183  | 16070 | 71   | 3.752713 | 0.045984 |
| midnightb   | 8801 GSE15930_STIM_VS_STIM_AND_TRICHOSTATINA_24H   | 3   | 183  | 16070 | 71   | 3.752713 | 0.045984 |
| midnightb   | 9501 GSE2706_UNSTIM_VS_8H_R848_DC_DN               | 3   | 183  | 16070 | 71   | 3.752713 | 0.045984 |
| midnightb   | 9668 GSE29618_BCELL_VS_PDC_DAY7_FLU_VACCINE_UP     | 3   | 183  | 16070 | 71   | 3.752713 | 0.045984 |
| midnightb   | 9885 GSE360_HIGH_VS_LOW_DOSE_B_MALAYI_MAC_DN       | 3   | 183  | 16070 | 71   | 3.752713 | 0.045984 |
| midnightb   | 9960 GSE3982_MEMORY_CD4_TCELL_VS_TH2_UP            | 3   | 183  | 16070 | 71   | 3.752713 | 0.045984 |
| salmon      | 5192 CASTELLANO_HRAS_TARGETS_DN                    | 1   | 6    | 16247 | 127  | 21.3294  | 0.045984 |
| salmon      | 6051 BYSTRYKH_SCP2_QTL                             | 1   | 6    | 16247 | 127  | 21.3294  | 0.045984 |
| salmon      | 9034 GSE17721_PAM3CSK4_VS_GADIQUIMOD_16H_BMDM      | 4   | 172  | 16081 | 127  | 2.976195 | 0.046    |
| salmon      | 9104 GSE17721_0.5H_VS_4H_POLYIC_BMDM_UP            | 4   | 172  | 16081 | 127  | 2.976195 | 0.046    |
| salmon      | 10073 GSE3982_BASOPHIL_VS_EFF_MEMORY_CD4_TCELL_DN  | 4   | 172  | 16081 | 127  | 2.976195 | 0.046    |
| lightcyan   | 6415 BLALOCK_ALZHEIMERS_DISEASE_INCIPIENT_UP       | 4   | 354  | 15899 | 62   | 2.962092 | 0.046024 |
| brown       | 2116 GTGCCAA,MIR-96                                | 46  | 267  | 15986 | 2190 | 1.278604 | 0.046027 |
| brown       | 5897 PASQUALUCCI_LYMPHOMA_BY_GC_STAGE_UP           | 46  | 267  | 15986 | 2190 | 1.278604 | 0.046027 |
| brown       | 6937 HELLER_HDAC_TARGETS_SILENCED_BY METHYLATION   | 46  | 267  | 15986 | 2190 | 1.278604 | 0.046027 |
| greenyello  | 1484 V\$NFKAPPAB_01                                | 5   | 211  | 16042 | 150  | 2.567615 | 0.046075 |
| blue        | 6035 ONDER_CDH1_TARGETS_1_DN                       | 34  | 140  | 16113 | 2978 | 1.325439 | 0.046098 |
| blue        | 8522 GSE12845_PRE_GC_VS_DARKZONE_GC_TONSIL_BCELL   | 44  | 188  | 16065 | 2978 | 1.277332 | 0.046126 |
| blue        | 9428 GSE24142_ADULT_VS_FETAL_DN2_THYMOCYTE_UP      | 44  | 188  | 16065 | 2978 | 1.277332 | 0.046126 |
| blue        | 9770 GSE339_CD4POS_VS_CD4CD8DN_DC_UP               | 44  | 188  | 16065 | 2978 | 1.277332 | 0.046126 |
| pink        | 3632 MODULE_147                                    | 4   | 96   | 16157 | 228  | 2.970212 | 0.046146 |
| pink        | 8166 LIM_MAMMARY_LUMINAL_MATURE_UP                 | 4   | 96   | 16157 | 228  | 2.970212 | 0.046146 |
| turquoise   | 1120 HEPARIN_BINDING                               | 8   | 17   | 16236 | 4169 | 1.834606 | 0.046255 |
| turquoise   | 4208 REACTOME_RIP_MEDIATED_NFKB_ACTIVATION_VIA_D   | 8   | 17   | 16236 | 4169 | 1.834606 | 0.046255 |
| turquoise   | 4573 REACTOME_ACTIVATED_TAK1_MEDIATES_P38_MAPK     | 8   | 17   | 16236 | 4169 | 1.834606 | 0.046255 |
| turquoise   | 6551 YIH_RESPONSE_TO_ARSENITE_C2                   | 8   | 17   | 16236 | 4169 | 1.834606 | 0.046255 |
| lightcyan   | 6857 GAVIN_FOXP3_TARGETS_CLUSTER_P6                | 2   | 90   | 16163 | 62   | 5.825448 | 0.046281 |
| turquoise   | 10059 GSE3982_NEUTROPHIL_VS_TH2_DN                 | 60  | 192  | 16061 | 4169 | 1.218293 | 0.046288 |
| red         | 3523 MODULE_33                                     | 16  | 312  | 15941 | 524  | 1.590624 | 0.046291 |
| turquoise   | 2086 GGCAGTG,MIR-324-3P                            | 28  | 81   | 16172 | 4169 | 1.347642 | 0.046295 |
| cyan        | 3519 MODULE_27                                     | 4   | 285  | 15968 | 77   | 2.962497 | 0.046304 |
| grey60      | 4489 REACTOME_G_ALPHA_I_SIGNALLING_EVENTS          | 2   | 127  | 16126 | 44   | 5.817108 | 0.046304 |
| salmon      | 2799 KEGG_NUCLEOTIDE_EXCISION_REPAIR               | 2   | 44   | 16209 | 127  | 5.817108 | 0.046304 |
| salmon      | 4413 REACTOME_TRANSCRIPTION_COUPLED_NER_TC_NER     | 2   | 44   | 16209 | 127  | 5.817108 | 0.046304 |
| salmon      | 6771 JIANG_AGING_HYPOTHALAMUS_UP                   | 2   | 44   | 16209 | 127  | 5.817108 | 0.046304 |
| salmon      | 7136 GRADE_METASTASIS_DN                           | 2   | 44   | 16209 | 127  | 5.817108 | 0.046304 |
| red         | 1512 V\$IK1_01                                     | 12  | 215  | 16038 | 524  | 1.731191 | 0.046308 |
| red         | 1900 V\$ER_Q6_01                                   | 12  | 215  | 16038 | 524  | 1.731191 | 0.046308 |
| magenta     | 1680 V\$EN1_01                                     | 3   | 78   | 16175 | 167  | 3.743206 | 0.046323 |

|             |       |                                               |    |     |       |      |          |          |
|-------------|-------|-----------------------------------------------|----|-----|-------|------|----------|----------|
| magenta     | 2892  | KEGG_SMALL_CELL_LUNG_CANCER                   | 3  | 78  | 16175 | 167  | 3.743206 | 0.046323 |
| magenta     | 5972  | MORI_SMALL_PRE_BII_LYMPHOCYTE_UP              | 3  | 78  | 16175 | 167  | 3.743206 | 0.046323 |
| magenta     | 6115  | SANA_TNF_SIGNALING_DN                         | 3  | 78  | 16175 | 167  | 3.743206 | 0.046323 |
| magenta     | 7576  | MIKKELSEN_IPS_ICP_WITH_H3K4ME3_AND_H327ME3    | 3  | 78  | 16175 | 167  | 3.743206 | 0.046323 |
| yellow      | 9186  | GSE17974_IL4_AND_ANTI_IL12_VS_UNTREATED_0.5H_ | 20 | 153 | 16100 | 1426 | 1.489884 | 0.046376 |
| greenyello  | 8265  | PRC2_EDD_UP.V1_DN                             | 4  | 146 | 16107 | 150  | 2.968584 | 0.046378 |
| greenyello  | 8327  | IL2_UP.V1_DN                                  | 4  | 146 | 16107 | 150  | 2.968584 | 0.046378 |
| yellow      | 1620  | V\$AHRARNT_01                                 | 16 | 116 | 16137 | 1426 | 1.572085 | 0.046386 |
| cyan        | 573   | MYELOID_LEUKOCYTE_DIFFERENTIATION             | 1  | 10  | 16243 | 77   | 21.10779 | 0.046391 |
| cyan        | 843   | RESPONSE_TO_IONIZING_RADIATION                | 1  | 10  | 16243 | 77   | 21.10779 | 0.046391 |
| cyan        | 2910  | BIOCARTA_LYM_PATHWAY                          | 1  | 10  | 16243 | 77   | 21.10779 | 0.046391 |
| cyan        | 3021  | BIOCARTA_MONOCYTE_PATHWAY                     | 1  | 10  | 16243 | 77   | 21.10779 | 0.046391 |
| cyan        | 3075  | BIOCARTA_PARKIN_PATHWAY                       | 1  | 10  | 16243 | 77   | 21.10779 | 0.046391 |
| cyan        | 3207  | chr2q34                                       | 1  | 10  | 16243 | 77   | 21.10779 | 0.046391 |
| cyan        | 3873  | MODULE_471                                    | 1  | 10  | 16243 | 77   | 21.10779 | 0.046391 |
| cyan        | 4220  | REACTOME_REGULATION_OF_COMPLEMENT_CASCADE     | 1  | 10  | 16243 | 77   | 21.10779 | 0.046391 |
| cyan        | 4672  | REACTOME_IL_6_SIGNALING                       | 1  | 10  | 16243 | 77   | 21.10779 | 0.046391 |
| purple      | 6614  | LEE_AGING_NEOCORTEX_UP                        | 3  | 83  | 16170 | 157  | 3.74177  | 0.046394 |
| brown       | 1958  | TGCACTT,MIR-519C,MIR-519B,MIR-519A            | 64 | 387 | 15866 | 2190 | 1.227322 | 0.046405 |
| pink        | 9292  | GSE20715_0H_VS_48H_OZONE_LUNG_UP              | 6  | 185 | 16068 | 228  | 2.311949 | 0.046447 |
| pink        | 9765  | GSE3337_4H_VS_16H_IFNG_IN_CD8POS_DC_DN        | 6  | 185 | 16068 | 228  | 2.311949 | 0.046447 |
| brown       | 421   | NEGATIVE_REGULATION_OF_TRANSCRIPTION_DNA_DE   | 22 | 113 | 16140 | 2190 | 1.444886 | 0.046454 |
| brown       | 5277  | MISSIAGLIA_REGULATED_BY_METHYLATION_UP        | 22 | 113 | 16140 | 2190 | 1.444886 | 0.046454 |
| brown       | 926   | LYMPHOCYTE_ACTIVATION                         | 12 | 53  | 16200 | 2190 | 1.680331 | 0.046455 |
| brown       | 3725  | MODULE_256                                    | 12 | 53  | 16200 | 2190 | 1.680331 | 0.046455 |
| purple      | 4828  | ONKEN_UVEAL_MELANOMA_DN                       | 9  | 486 | 15767 | 157  | 1.917079 | 0.046463 |
| red         | 144   | ENDOSOME                                      | 5  | 61  | 16192 | 524  | 2.542391 | 0.046465 |
| red         | 1813  | GATGKMRGCG_UNKNOWN                            | 5  | 61  | 16192 | 524  | 2.542391 | 0.046465 |
| lightyellow | 9625  | GSE2826_WT_VS_XID_BCELL_DN                    | 2  | 170 | 16083 | 33   | 5.794296 | 0.046472 |
| magenta     | 1547  | V\$TST1_01                                    | 5  | 190 | 16063 | 167  | 2.561141 | 0.046513 |
| magenta     | 1581  | V\$MYB_Q6                                     | 5  | 190 | 16063 | 167  | 2.561141 | 0.046513 |
| green       | 8500  | GSE12366_PLASMA_CELL_VS_MEMORY_BCELL_UP       | 20 | 167 | 16086 | 1305 | 1.491546 | 0.046546 |
| grey60      | 6978  | IWANAGA_CARCIANOGENESIS_BY_KRAS_PTEN_DN       | 3  | 298 | 15955 | 44   | 3.718655 | 0.046552 |
| greenyello  | 1623  | V\$NKX25_01                                   | 3  | 87  | 16166 | 150  | 3.736322 | 0.046578 |
| brown       | 8847  | GSE17721_CTRL_VS_LPS_24H_BMDM_DN              | 34 | 189 | 16064 | 2190 | 1.335078 | 0.046595 |
| brown       | 8923  | GSE17721_LPS_VS_POLYIC_8H_BMDM_DN             | 34 | 189 | 16064 | 2190 | 1.335078 | 0.046595 |
| brown       | 10153 | GSE7460_TCONV_VS_TREG_THYMUS_DN               | 34 | 189 | 16064 | 2190 | 1.335078 | 0.046595 |
| midnightb   | 8504  | GSE12845_IGD_POS_VS_NEG_BLOOD_BCELL_UP        | 3  | 184 | 16069 | 71   | 3.732318 | 0.046604 |
| midnightb   | 9174  | GSE17974_CTRL_VS_ACT_IL4_AND_ANTI_IL12_4H_CD4 | 3  | 184 | 16069 | 71   | 3.732318 | 0.046604 |
| midnightb   | 9318  | GSE22886_NAIVE_CD8_TCELL_VS_NKCELL_UP         | 3  | 184 | 16069 | 71   | 3.732318 | 0.046604 |
| midnightb   | 9666  | GSE29618_BCELL_VS_MONOCYTE_DAY7_FLU_VACCINE   | 3  | 184 | 16069 | 71   | 3.732318 | 0.046604 |
| midnightb   | 10055 | GSE3982_NEUTROPHIL_VS_NKCELL_DN               | 3  | 184 | 16069 | 71   | 3.732318 | 0.046604 |
| turquoise   | 9535  | GSE27786_LSK_VS_CD8_TCELL_DN                  | 58 | 185 | 16068 | 4169 | 1.222244 | 0.04661  |
| purple      | 4845  | SENGUPTA_NASOPHARYNGEAL_CARCIANOMA_DN         | 6  | 269 | 15984 | 157  | 2.309047 | 0.046611 |
| magenta     | 356   | CELL_SURFACE_RECEPTOR_LINKED_SIGNAL_TRANSDUC  | 9  | 457 | 15796 | 167  | 1.916652 | 0.046623 |
| yellow      | 8311  | NRL_DN.V1_DN                                  | 15 | 107 | 16146 | 1426 | 1.597797 | 0.046647 |
| blue        | 1767  | V\$ATF4_Q2                                    | 53 | 232 | 16021 | 2978 | 1.2468   | 0.046651 |
| turquoise   | 1828  | V\$PAX8_01                                    | 12 | 29  | 16224 | 4169 | 1.613188 | 0.046661 |
| turquoise   | 2915  | BIOCARTA_ALK_PATHWAY                          | 12 | 29  | 16224 | 4169 | 1.613188 | 0.046661 |
| turquoise   | 5172  | CHOW_RASSF1_TARGETS_DN                        | 12 | 29  | 16224 | 4169 | 1.613188 | 0.046661 |
| turquoise   | 7110  | ZHENG_IL22_SIGNALING_DN                       | 12 | 29  | 16224 | 4169 | 1.613188 | 0.046661 |
| turquoise   | 8122  | YU_BAP1_TARGETS                               | 12 | 29  | 16224 | 4169 | 1.613188 | 0.046661 |
| lightcyan   | 6580  | DAZARD_RESPONSE_TO_UV_NHEK_UP                 | 3  | 211 | 16042 | 62   | 3.727182 | 0.046665 |
| black       | 8806  | GSE15930_STIM_VS_STIM_AND_TRICHOSTATINA_48H_  | 7  | 188 | 16065 | 283  | 2.138392 | 0.046673 |
| black       | 9406  | GSE24102_GRANULOCYSTIC_MDSC_VS_NEUTROPHIL_I   | 7  | 188 | 16065 | 283  | 2.138392 | 0.046673 |
| blue        | 2373  | MORF_DAP3                                     | 45 | 193 | 16060 | 2978 | 1.272518 | 0.046677 |
| blue        | 10108 | GSE39820_CTRL_VS_TGFBETA3_IL6_CD4_TCELL_UP    | 45 | 193 | 16060 | 2978 | 1.272518 | 0.046677 |
| yellow      | 1310  | STRUCTURAL_MOLECULE_ACTIVITY                  | 24 | 191 | 16062 | 1426 | 1.432161 | 0.046703 |
| yellow      | 8910  | GSE17721_CTRL_VS_GARDIQUIMOD_24H_BMDM_UP      | 24 | 191 | 16062 | 1426 | 1.432161 | 0.046703 |
| yellow      | 9030  | GSE17721_PAM3CSK4_VS_GADIQUIMOD_8H_BMDM_      | 24 | 191 | 16062 | 1426 | 1.432161 | 0.046703 |

|             |                                                    |     |      |       |      |          |          |
|-------------|----------------------------------------------------|-----|------|-------|------|----------|----------|
| yellow      | 9094 GSE17721_0.5H_VS_4H_LPS_BMDM_UP               | 24  | 191  | 16062 | 1426 | 1.432161 | 0.046703 |
| yellow      | 9899 GSE36392_EOSINOPHIL_VS_NEUTROPHIL_IL25_TREATE | 24  | 191  | 16062 | 1426 | 1.432161 | 0.046703 |
| blue        | 416 CELLULAR_PROTEIN_CATABOLIC_PROCESS             | 16  | 57   | 16196 | 2978 | 1.531983 | 0.046704 |
| black       | 214 RIBOSOMAL_SUBUNIT                              | 2   | 20   | 16233 | 283  | 5.74311  | 0.046711 |
| black       | 1445 METALLOENDOPEPTIDASE_ACTIVITY                 | 2   | 20   | 16233 | 283  | 5.74311  | 0.046711 |
| red         | 2846 KEGG_T_CELL_RECEPTOR_SIGNALING_PATHWAY        | 7   | 102  | 16151 | 524  | 2.12863  | 0.046764 |
| cyan        | 8094 KRIEG_HYPOXIA_NOT_VIA_KDM3A                   | 7   | 697  | 15556 | 77   | 2.119864 | 0.046798 |
| salmon      | 9108 GSE17721_0.5H_VS_24H_POLYIC_BMDM_UP           | 4   | 173  | 16080 | 127  | 2.958991 | 0.046815 |
| salmon      | 9954 GSE3982_CTRL_VS_LPS_1H_NEUTROPHIL_UP          | 4   | 173  | 16080 | 127  | 2.958991 | 0.046815 |
| brown       | 307 BIOPOLYMER_METABOLIC_PROCESS                   | 228 | 1529 | 14724 | 2190 | 1.106667 | 0.046839 |
| magenta     | 5087 ZHOU_INFLAMMATORY_RESPONSE_LPS_UP             | 7   | 319  | 15934 | 167  | 2.135622 | 0.046859 |
| turquoise   | 2379 MORF_DMPK                                     | 42  | 129  | 16124 | 4169 | 1.269291 | 0.046863 |
| brown       | 1878 V\$YY1_Q6                                     | 40  | 228  | 16025 | 2190 | 1.302011 | 0.046871 |
| cyan        | 6217 SASAKI_ADULT_T_CELL_LEUKEMIA                  | 3   | 170  | 16083 | 77   | 3.724905 | 0.046877 |
| cyan        | 6327 AFFAR_YY1_TARGETS_UP                          | 3   | 170  | 16083 | 77   | 3.724905 | 0.046877 |
| cyan        | 7524 CHIANG_LIVER_CANCER_SUBCLASS_PROLIFERATION_U  | 3   | 170  | 16083 | 77   | 3.724905 | 0.046877 |
| cyan        | 9513 GSE2706_R848_VS_LPS_8H_STIM_DC_DN             | 3   | 170  | 16083 | 77   | 3.724905 | 0.046877 |
| lightgreen  | 8441 GSE10463_CD40L_AND_VA347_VS_CD40L_IN_DC_DN    | 2   | 134  | 16119 | 42   | 5.775764 | 0.04688  |
| yellow      | 3549 MODULE_60                                     | 42  | 368  | 15885 | 1426 | 1.300815 | 0.046886 |
| turquoise   | 9038 GSE17721_LPS_VS_CPG_0.5H_BMDM_UP              | 56  | 178  | 16075 | 4169 | 1.226506 | 0.046887 |
| turquoise   | 9090 GSE17721_LPS_VS_GARDIQUIMOD_24H_BMDM_UP       | 56  | 178  | 16075 | 4169 | 1.226506 | 0.046887 |
| green       | 1819 V\$HEB_Q6                                     | 25  | 219  | 16034 | 1305 | 1.421736 | 0.046931 |
| lightyellow | 4368 REACTOME_CLASS_A1_RHODOPSIN_LIKE_RECEPTORS    | 2   | 171  | 16082 | 33   | 5.760411 | 0.046963 |
| lightyellow | 5044 TONKS_TARGETS_OF_RUNX1_RUNX1T1_FUSION_HSC_    | 2   | 171  | 16082 | 33   | 5.760411 | 0.046963 |
| lightyellow | 8224 PIGF_UP.V1_UP                                 | 2   | 171  | 16082 | 33   | 5.760411 | 0.046963 |
| midnightb   | 846 TRANSITION_METAL_ION_TRANSPORT                 | 1   | 11   | 16242 | 71   | 20.8105  | 0.047031 |
| midnightb   | 1170 CARBONATE_DEHYDRATASE_ACTIVITY                | 1   | 11   | 16242 | 71   | 20.8105  | 0.047031 |
| midnightb   | 1244 STEROID_HORMONE_RECEPTOR_ACTIVITY             | 1   | 11   | 16242 | 71   | 20.8105  | 0.047031 |
| midnightb   | 1437 SINGLE_STRANDED_RNA_BINDING                   | 1   | 11   | 16242 | 71   | 20.8105  | 0.047031 |
| midnightb   | 2913 BIOCARTA_AKAP95_PATHWAY                       | 1   | 11   | 16242 | 71   | 20.8105  | 0.047031 |
| red         | 8662 GSE1432_CTRL_VS_IFNG_24H_MICROGLIA_UP         | 11  | 192  | 16061 | 524  | 1.777026 | 0.04706  |
| red         | 1261 SULFURIC_ESTER_HYDROLASE_ACTIVITY             | 2   | 11   | 16242 | 524  | 5.639486 | 0.047063 |
| red         | 1317 NF_KAPPAB_BINDING                             | 2   | 11   | 16242 | 524  | 5.639486 | 0.047063 |
| red         | 1347 POTASSIUM_CHANNEL_REGULATOR_ACTIVITY          | 2   | 11   | 16242 | 524  | 5.639486 | 0.047063 |
| red         | 1437 SINGLE_STRANDED_RNA_BINDING                   | 2   | 11   | 16242 | 524  | 5.639486 | 0.047063 |
| red         | 2971 BIOCARTA_EPONFKB_PATHWAY                      | 2   | 11   | 16242 | 524  | 5.639486 | 0.047063 |
| red         | 4065 PID_P38GAMMADELTA_PATHWAY                     | 2   | 11   | 16242 | 524  | 5.639486 | 0.047063 |
| red         | 4274 REACTOME_ALPHA_LINOLENIC_ACID_ALA_METABOLIS   | 2   | 11   | 16242 | 524  | 5.639486 | 0.047063 |
| red         | 4459 REACTOME_ACTIVATION_OF_CHAPERONES_BY_ATF6_    | 2   | 11   | 16242 | 524  | 5.639486 | 0.047063 |
| red         | 4487 REACTOME_ACTIVATION_OF_RAC                    | 2   | 11   | 16242 | 524  | 5.639486 | 0.047063 |
| red         | 4655 REACTOME_REGULATION_OF_IFNA_SIGNALING         | 2   | 11   | 16242 | 524  | 5.639486 | 0.047063 |
| red         | 5508 MATTIOLI_MULTIPLE_MYELOMA_SUBGROUPS           | 2   | 11   | 16242 | 524  | 5.639486 | 0.047063 |
| red         | 5769 WILLIAMS_ESR2_TARGETS_DN                      | 2   | 11   | 16242 | 524  | 5.639486 | 0.047063 |
| red         | 6432 RUAN_RESPONSE_TO_TNF_UP                       | 2   | 11   | 16242 | 524  | 5.639486 | 0.047063 |
| red         | 6939 CLAUS_PGR_POSITIVE_MENINGIOMA_DN              | 2   | 11   | 16242 | 524  | 5.639486 | 0.047063 |
| blue        | 2118 GAGCTGG,MIR-337                               | 35  | 145  | 16108 | 2978 | 1.317373 | 0.047099 |
| purple      | 643 ANGIOGENESIS                                   | 2   | 36   | 16217 | 157  | 5.751238 | 0.047155 |
| purple      | 1043 CAMP_MEDIATED_SIGNALING                       | 2   | 36   | 16217 | 157  | 5.751238 | 0.047155 |
| purple      | 6404 TRAYNOR_RETT_SYNDROM_UP                       | 2   | 36   | 16217 | 157  | 5.751238 | 0.047155 |
| purple      | 6486 SATO_SILENCED_BY_METHYLATION_IN_PANCREATIC_C  | 2   | 36   | 16217 | 157  | 5.751238 | 0.047155 |
| purple      | 7155 NAKAMURA_METASTASIS_MODEL_DN                  | 2   | 36   | 16217 | 157  | 5.751238 | 0.047155 |
| purple      | 7835 NOUSHMEHR_GBM_SILENCED_BY_METHYLATION         | 2   | 36   | 16217 | 157  | 5.751238 | 0.047155 |
| purple      | 8365 KRAS.50_UP.V1_UP                              | 2   | 36   | 16217 | 157  | 5.751238 | 0.047155 |
| blue        | 4571 REACTOME_MITOTIC_G2_G2_M_PHASES               | 20  | 75   | 16178 | 2978 | 1.455384 | 0.047161 |
| salmon      | 1669 V\$GABP_B                                     | 5   | 251  | 16002 | 127  | 2.54933  | 0.047167 |
| brown       | 762 ANTI_APOPTOSIS                                 | 21  | 107  | 16146 | 2190 | 1.456548 | 0.047175 |
| blue        | 967 PROTEIN_LOCALIZATION                           | 46  | 198  | 16055 | 2978 | 1.267948 | 0.047193 |
| blue        | 1245 NUCLEOSIDE_TRIPHOSPHATASE_ACTIVITY            | 46  | 198  | 16055 | 2978 | 1.267948 | 0.047193 |
| midnightb   | 8508 GSE12845_IGD_POS_BLOOD_VS_PRE_GC_TONSIL_BCEI  | 3   | 185  | 16068 | 71   | 3.712143 | 0.047228 |
| midnightb   | 8645 GSE14308_TH1_VS_NATURAL_TREG_DN               | 3   | 185  | 16068 | 71   | 3.712143 | 0.047228 |

|             |       |                                              |     |     |       |      |          |          |
|-------------|-------|----------------------------------------------|-----|-----|-------|------|----------|----------|
| midnightb   | 9483  | GSE26669_CD4_VS_CD8_TCELL_IN_MLR_DN          | 3   | 185 | 16068 | 71   | 3.712143 | 0.047228 |
| midnightb   | 9868  | GSE360_L_DONOVANI_VS_M_TUBERCULOSIS_MAC_UF   | 3   | 185 | 16068 | 71   | 3.712143 | 0.047228 |
| midnightb   | 9987  | GSE3982_EOSINOPHIL_VS_NKCELL_DN              | 3   | 185 | 16068 | 71   | 3.712143 | 0.047228 |
| tan         | 2495  | GCM_TINF2                                    | 2   | 39  | 16214 | 145  | 5.748187 | 0.047246 |
| turquoise   | 2522  | GCM_GSPT1                                    | 52  | 164 | 16089 | 4169 | 1.236121 | 0.047277 |
| magenta     | 4970  | VECCHI_GASTRIC_CANCER_ADVANCED_VS_EARLY_UP   | 4   | 132 | 16121 | 167  | 2.949193 | 0.047296 |
| magenta     | 8234  | ATF2_UP.V1_UP                                | 4   | 132 | 16121 | 167  | 2.949193 | 0.047296 |
| greenyello  | 1344  | CYTOSKELETAL_PROTEIN_BINDING                 | 4   | 147 | 16106 | 150  | 2.94839  | 0.047346 |
| greenyello  | 9197  | GSE17974_IL4_AND_ANTI_IL12_VS_UNTREATED_12H_ | 4   | 147 | 16106 | 150  | 2.94839  | 0.047346 |
| greenyello  | 9202  | GSE17974_IL4_AND_ANTI_IL12_VS_UNTREATED_72H_ | 4   | 147 | 16106 | 150  | 2.94839  | 0.047346 |
| red         | 8732  | GSE15215_CD2_POS_VS_NEG_PDC_UP               | 10  | 169 | 16084 | 524  | 1.835336 | 0.047348 |
| red         | 10241 | GSE9037_CTRL_VS_LPS_1H_STIM_BMDM_DN          | 10  | 169 | 16084 | 524  | 1.835336 | 0.047348 |
| red         | 10245 | GSE9037_CTRL_VS_LPS_1H_STIM_IRAK4_KO_BMDM_DN | 10  | 169 | 16084 | 524  | 1.835336 | 0.047348 |
| purple      | 4138  | REACTOME_RECYCLING_OF_BILE_ACIDS_AND_SALTS   | 1   | 5   | 16248 | 157  | 20.70446 | 0.04738  |
| purple      | 4804  | PYEON_HPV_POSITIVE_TUMORS_DN                 | 1   | 5   | 16248 | 157  | 20.70446 | 0.04738  |
| purple      | 4881  | TURASHVILI_BREAST_CARCINOMA_DUCTAL_VS_LOBUL  | 1   | 5   | 16248 | 157  | 20.70446 | 0.04738  |
| purple      | 5346  | OZANNE_AP1_TARGETS_DN                        | 1   | 5   | 16248 | 157  | 20.70446 | 0.04738  |
| purple      | 5763  | GALIE_TUMOR_STEMNESS_GENES                   | 1   | 5   | 16248 | 157  | 20.70446 | 0.04738  |
| purple      | 6824  | MILICIC_FAMILIAL_ADENOMATOUS_POLYPOSIS_DN    | 1   | 5   | 16248 | 157  | 20.70446 | 0.04738  |
| purple      | 7167  | SHARMA_ASTROCYTOMA_WITH_NF1_SYNDROM          | 1   | 5   | 16248 | 157  | 20.70446 | 0.04738  |
| purple      | 7288  | JU_AGING_TERC_TARGETS_DN                     | 1   | 5   | 16248 | 157  | 20.70446 | 0.04738  |
| purple      | 7602  | TSAI_DNAJB4_TARGETS_DN                       | 1   | 5   | 16248 | 157  | 20.70446 | 0.04738  |
| purple      | 7927  | JOHNSTONE_PARVB_TARGETS_1_UP                 | 1   | 5   | 16248 | 157  | 20.70446 | 0.04738  |
| magenta     | 1726  | V\$GATA6_01                                  | 5   | 191 | 16062 | 167  | 2.547732 | 0.047383 |
| magenta     | 8455  | GSE11057_CD4_CENT_MEM_VS_PBMC_DN             | 5   | 191 | 16062 | 167  | 2.547732 | 0.047383 |
| magenta     | 9408  | GSE24142_EARLY_THYMIC_PROGENITOR_VS_DN2_THY  | 5   | 191 | 16062 | 167  | 2.547732 | 0.047383 |
| magenta     | 10169 | GSE7460_CTRL_VS_TGFB_TREATED_ACT_FOXP3_HET_1 | 5   | 191 | 16062 | 167  | 2.547732 | 0.047383 |
| magenta     | 10175 | GSE7460_FOXP3_MUT_VS_WT_ACT_WITH_TGFB_TCOI   | 5   | 191 | 16062 | 167  | 2.547732 | 0.047383 |
| brown       | 1823  | V\$TFIII_Q6                                  | 31  | 170 | 16083 | 2190 | 1.353325 | 0.047405 |
| lightyellow | 3600  | MODULE_112                                   | 2   | 172 | 16081 | 33   | 5.72692  | 0.047457 |
| pink        | 6223  | PENG_RAPAMYCIN_RESPONSE_UP                   | 6   | 186 | 16067 | 228  | 2.299519 | 0.047459 |
| pink        | 8545  | GSE13306_RA_VS_UNTREATED_MEM_CD4_TCELL_DN    | 6   | 186 | 16067 | 228  | 2.299519 | 0.047459 |
| pink        | 9409  | GSE24142_EARLY_THYMIC_PROGENITOR_VS_DN2_THY  | 6   | 186 | 16067 | 228  | 2.299519 | 0.047459 |
| pink        | 9772  | GSE339_CD8POS_VS_CD4CD8DN_DC_UP              | 6   | 186 | 16067 | 228  | 2.299519 | 0.047459 |
| magenta     | 2273  | YATGNWAAT_V\$OCT_C                           | 6   | 254 | 15999 | 167  | 2.298977 | 0.047465 |
| turquoise   | 758   | LIPOPROTEIN_BIOSYNTHETIC_PROCESS             | 11  | 26  | 16227 | 4169 | 1.649381 | 0.047465 |
| turquoise   | 3702  | MODULE_226                                   | 11  | 26  | 16227 | 4169 | 1.649381 | 0.047465 |
| pink        | 998   | ORGAN_DEVELOPMENT                            | 10  | 388 | 15865 | 228  | 1.837245 | 0.047504 |
| magenta     | 817   | CYTOKINE_BIOSYNTHETIC_PROCESS                | 2   | 34  | 16219 | 167  | 5.724903 | 0.047507 |
| magenta     | 2407  | MORF_ITGA2                                   | 2   | 34  | 16219 | 167  | 5.724903 | 0.047507 |
| magenta     | 6851  | LEIN_LOCALIZED_TO_PROXIMAL_DENDRITES         | 2   | 34  | 16219 | 167  | 5.724903 | 0.047507 |
| magenta     | 6990  | OSADA_ASCL1_TARGETS_UP                       | 2   | 34  | 16219 | 167  | 5.724903 | 0.047507 |
| magenta     | 7428  | SHAFFER_IRF4_MULTIPLE_MYELOMA_PROGRAM        | 2   | 34  | 16219 | 167  | 5.724903 | 0.047507 |
| magenta     | 7698  | DORN_ADENOVIRUS_INFECTION_32HR_DN            | 2   | 34  | 16219 | 167  | 5.724903 | 0.047507 |
| magenta     | 7700  | DORN_ADENOVIRUS_INFECTION_48HR_DN            | 2   | 34  | 16219 | 167  | 5.724903 | 0.047507 |
| green       | 10201 | GSE7852_LN_VS_FAT_TREG_DN                    | 22  | 188 | 16065 | 1305 | 1.457431 | 0.047516 |
| turquoise   | 4236  | REACTOME_SIGNALING_BY_BMP                    | 9   | 20  | 16233 | 4169 | 1.754342 | 0.047523 |
| turquoise   | 4835  | FOURNIER_ACINAR_DEVELOPMENT_EARLY_UP         | 9   | 20  | 16233 | 4169 | 1.754342 | 0.047523 |
| turquoise   | 5731  | SPIELMAN_LYMPHOBLAST_EUROPEAN_VS_ASIAN_2FC   | 9   | 20  | 16233 | 4169 | 1.754342 | 0.047523 |
| turquoise   | 7160  | WEST_ADRENOCORTICAL_CARCINOMA_VS_ADENOMA     | 9   | 20  | 16233 | 4169 | 1.754342 | 0.047523 |
| red         | 5455  | LINDGREN_BLADDER_CANCER_CLUSTER_2B           | 17  | 338 | 15915 | 524  | 1.560035 | 0.047524 |
| black       | 473   | REGULATION_OF_PROTEIN_METABOLIC_PROCESS      | 6   | 150 | 16103 | 283  | 2.297244 | 0.047542 |
| black       | 3726  | MODULE_257                                   | 6   | 150 | 16103 | 283  | 2.297244 | 0.047542 |
| brown       | 6415  | BLALOCK_ALZHEIMERS_DISEASE_INCIPIENT_UP      | 59  | 354 | 15899 | 2190 | 1.23691  | 0.047553 |
| cyan        | 9078  | GSE17721_LPS_VS_GARDIQUIMOD_2H_BMDM_UP       | 3   | 171 | 16082 | 77   | 3.703121 | 0.047557 |
| brown       | 239   | RNA_METABOLIC_PROCESS                        | 118 | 757 | 15496 | 2190 | 1.156846 | 0.047561 |
| pink        | 3387  | chr7q35                                      | 2   | 25  | 16228 | 228  | 5.702807 | 0.047574 |
| pink        | 4245  | REACTOME_SMAD2_SMAD3_SMAD4_HETEROTRIMER_     | 2   | 25  | 16228 | 228  | 5.702807 | 0.047574 |
| pink        | 6604  | ZHANG_ANTIVIRAL_RESPONSE_TO_RIBAVIRIN_UP     | 2   | 25  | 16228 | 228  | 5.702807 | 0.047574 |
| pink        | 8084  | PLASARI_TGFB1_SIGNALING_VIA_NFIC_10HR_DN     | 2   | 25  | 16228 | 228  | 5.702807 | 0.047574 |



|             |                                                     |     |     |       |      |          |          |
|-------------|-----------------------------------------------------|-----|-----|-------|------|----------|----------|
| grey60      | 1743 V\$AR_01                                       | 2   | 129 | 16124 | 44   | 5.72692  | 0.047619 |
| grey60      | 2260 YTAATTAA_V\$LHX3_01                            | 2   | 129 | 16124 | 44   | 5.72692  | 0.047619 |
| grey60      | 9688 GSE29618_PRE_VS_DAY7_POST_TIV_FLU_VACCINE_BC   | 2   | 129 | 16124 | 44   | 5.72692  | 0.047619 |
| pink        | 6047 CERVERA_SDHB_TARGETS_1_UP                      | 4   | 97  | 16156 | 228  | 2.939591 | 0.047623 |
| pink        | 7859 HIRSCH_CELLULAR_TRANSFORMATION_SIGNATURE_DN    | 4   | 97  | 16156 | 228  | 2.939591 | 0.047623 |
| greenyello  | 1555 V\$LYF1_01                                     | 5   | 213 | 16040 | 150  | 2.543505 | 0.047636 |
| greenyello  | 7909 CHYLA_CBFA2T3_TARGETS_DN                       | 5   | 213 | 16040 | 150  | 2.543505 | 0.047636 |
| salmon      | 8481 GSE11924_TFH_VS_TH1_CD4_TCELL_DN               | 4   | 174 | 16079 | 127  | 2.941986 | 0.047638 |
| salmon      | 9026 GSE17721_PAM3CSK4_VS_GADIQUIMOD_4H_BMDM_       | 4   | 174 | 16079 | 127  | 2.941986 | 0.047638 |
| lightyellow | 2567 CAR_IGFBP1                                     | 1   | 24  | 16229 | 33   | 20.52146 | 0.047641 |
| lightyellow | 2739 KEGG_HISTIDINE_METABOLISM                      | 1   | 24  | 16229 | 33   | 20.52146 | 0.047641 |
| lightyellow | 3125 chr7p21                                        | 1   | 24  | 16229 | 33   | 20.52146 | 0.047641 |
| lightyellow | 3792 MODULE_343                                     | 1   | 24  | 16229 | 33   | 20.52146 | 0.047641 |
| lightyellow | 5256 BERENJENO_TRANSFORMED_BY_RHOA_FOREVER_DN       | 1   | 24  | 16229 | 33   | 20.52146 | 0.047641 |
| lightyellow | 6753 ABE_VEGFA_TARGETS_30MIN                        | 1   | 24  | 16229 | 33   | 20.52146 | 0.047641 |
| lightyellow | 7367 WALLACE_JAK2_TARGETS_UP                        | 1   | 24  | 16229 | 33   | 20.52146 | 0.047641 |
| grey60      | 1368 INTERLEUKIN_RECEPTOR_ACTIVITY                  | 1   | 18  | 16235 | 44   | 20.52146 | 0.047649 |
| grey60      | 5272 TAKADA_GASTRIC_CANCER_COPY_NUMBER_DN           | 1   | 18  | 16235 | 44   | 20.52146 | 0.047649 |
| grey60      | 6112 KANNAN_TP53_TARGETS_DN                         | 1   | 18  | 16235 | 44   | 20.52146 | 0.047649 |
| grey60      | 6810 YANG_MUC2_TARGETS_DUODENUM_3MO_DN              | 1   | 18  | 16235 | 44   | 20.52146 | 0.047649 |
| grey60      | 7221 ALONSO_METASTASIS_DN                           | 1   | 18  | 16235 | 44   | 20.52146 | 0.047649 |
| grey60      | 7994 BILANGES_SERUM_SENSITIVE_VIA_TSC1              | 1   | 18  | 16235 | 44   | 20.52146 | 0.047649 |
| red         | 1911 V\$AP1_Q6_01                                   | 12  | 216 | 16037 | 524  | 1.723176 | 0.04767  |
| red         | 7364 VANTVEER_BREAST_CANCER_ESR1_DN                 | 12  | 216 | 16037 | 524  | 1.723176 | 0.04767  |
| turquoise   | 1818 V\$ETF_Q6                                      | 35  | 105 | 16148 | 4169 | 1.299512 | 0.04767  |
| tan         | 2537 GCM_NF2                                        | 6   | 293 | 15960 | 145  | 2.295351 | 0.047672 |
| lightcyan   | 7650 HOSHIDA_LIVER_CANCER_SUBCLASS_S3               | 3   | 213 | 16040 | 62   | 3.692185 | 0.047758 |
| black       | 8514 GSE12845_IGD_NEG_BLOOD_VS_PRE_GC_TONSIL_BCE    | 7   | 189 | 16064 | 283  | 2.127078 | 0.047781 |
| purple      | 8167 LIM_MAMMARY_LUMINAL_MATURE_DN                  | 3   | 84  | 16169 | 157  | 3.697225 | 0.047783 |
| turquoise   | 2796 KEGG_PROTEIN_EXPORT                            | 10  | 23  | 16230 | 4169 | 1.695016 | 0.047823 |
| turquoise   | 6724 YIH_RESPONSE_TO_ARSENITE_C1                    | 10  | 23  | 16230 | 4169 | 1.695016 | 0.047823 |
| midnightb   | 3500 MODULE_7                                       | 3   | 186 | 16067 | 71   | 3.692185 | 0.047857 |
| midnightb   | 9004 GSE17721_POLYIC_VS_CPG_1H_BMDM_UP              | 3   | 186 | 16067 | 71   | 3.692185 | 0.047857 |
| midnightb   | 9719 GSE30083_SP2_VS_SP4_THYMOCYTE_DN               | 3   | 186 | 16067 | 71   | 3.692185 | 0.047857 |
| midnightb   | 10132 GSE6269_HEALTHY_VS_STREP_PNEUMO_INF_PBMU_U    | 3   | 186 | 16067 | 71   | 3.692185 | 0.047857 |
| pink        | 6589 XU_GH1_EXOGENOUS_TARGETS_UP                    | 3   | 58  | 16195 | 228  | 3.68716  | 0.047859 |
| red         | 544 MULTICELLULAR_ORGANISMAL_DEVELOPMENT            | 32  | 729 | 15524 | 524  | 1.361522 | 0.047877 |
| greenyello  | 2089 TCTCTCC,MIR-185                                | 3   | 88  | 16165 | 150  | 3.693864 | 0.047907 |
| greenyello  | 501 CELLULAR_MORPHOGENESIS_DURING_DIFFERENTIATIC    | 2   | 38  | 16215 | 150  | 5.702807 | 0.047907 |
| greenyello  | 3244 chr12q12                                       | 2   | 38  | 16215 | 150  | 5.702807 | 0.047907 |
| greenyello  | 3385 chr17q24                                       | 2   | 38  | 16215 | 150  | 5.702807 | 0.047907 |
| greenyello  | 3990 PID_FASPATHWAY                                 | 2   | 38  | 16215 | 150  | 5.702807 | 0.047907 |
| greenyello  | 4070 PID_ERBB1_INTERNALIZATION_PATHWAY              | 2   | 38  | 16215 | 150  | 5.702807 | 0.047907 |
| greenyello  | 6288 HALMOS_CEBPA_TARGETS_DN                        | 2   | 38  | 16215 | 150  | 5.702807 | 0.047907 |
| greenyello  | 8185 ZWANG_CLASS_2_TRANSIENTLY_INDUCED_BY_EGF       | 2   | 38  | 16215 | 150  | 5.702807 | 0.047907 |
| purple      | 2809 KEGG_NEUROACTIVE_LIGAND_RECEPTOR_INTERACTIO    | 4   | 141 | 16112 | 157  | 2.936803 | 0.047911 |
| green       | 191 EXTRACELLULAR_MATRIX                            | 10  | 69  | 16184 | 1305 | 1.804986 | 0.047934 |
| brown       | 8624 GSE14000_4H_VS_16H_LPS_DC_UP                   | 33  | 183 | 16070 | 2190 | 1.338296 | 0.047936 |
| brown       | 8699 GSE1460_DP_THYMOCYTE_VS_NAIVE_CD4_TCELL_ADU    | 33  | 183 | 16070 | 2190 | 1.338296 | 0.047936 |
| brown       | 9402 GSE24026_PD1_LIGATION_VS_CTRL_IN_ACT_TCELL_LIN | 33  | 183 | 16070 | 2190 | 1.338296 | 0.047936 |
| turquoise   | 601 REGULATION_OF_CELLULAR_METABOLIC_PROCESS        | 199 | 700 | 15553 | 4169 | 1.108298 | 0.047949 |
| lightyellow | 8262 RAF_UP.V1_UP                                   | 2   | 173 | 16080 | 33   | 5.693817 | 0.047952 |
| lightyellow | 9237 GSE18791_CTRL_VS_NEWCASTLE_VIRUS_DC_18H_DN     | 2   | 173 | 16080 | 33   | 5.693817 | 0.047952 |
| green       | 2353 MORF_ARL3                                      | 26  | 230 | 16023 | 1305 | 1.407889 | 0.047961 |
| blue        | 9026 GSE17721_PAM3CSK4_VS_GADIQUIMOD_4H_BMDM_       | 41  | 174 | 16079 | 2978 | 1.286007 | 0.047971 |
| blue        | 9328 GSE22886_NAIVE_VS_IGG_IGA_MEMORY_BCELL_UP      | 41  | 174 | 16079 | 2978 | 1.286007 | 0.047971 |
| blue        | 9490 GSE26928_NAIVE_VS_CXCR5_POS_CD4_TCELL_UP       | 41  | 174 | 16079 | 2978 | 1.286007 | 0.047971 |
| blue        | 9491 GSE26928_NAIVE_VS_CXCR5_POS_CD4_TCELL_DN       | 41  | 174 | 16079 | 2978 | 1.286007 | 0.047971 |
| blue        | 10233 GSE9006_TYPE_1_DIABETES_AT_DX_VS_1MONTH_POS   | 41  | 174 | 16079 | 2978 | 1.286007 | 0.047971 |
| turquoise   | 7898 LI_DCP2_BOUND_MRNA                             | 30  | 88  | 16165 | 4169 | 1.329047 | 0.047972 |

|             |                                                    |    |     |       |      |          |          |
|-------------|----------------------------------------------------|----|-----|-------|------|----------|----------|
| lightyellow | 3553 MODULE_64                                     | 3  | 404 | 15849 | 33   | 3.657291 | 0.047991 |
| lightgreen  | 2815 KEGG_REGULATION_OF_AUTOPHAGY                  | 1  | 19  | 16234 | 42   | 20.36717 | 0.047999 |
| lightgreen  | 2869 KEGG_PROXIMAL_TUBULE_BICARBONATE_RECLAMATI    | 1  | 19  | 16234 | 42   | 20.36717 | 0.047999 |
| lightgreen  | 2955 BIOCARTA_INFLAM_PATHWAY                       | 1  | 19  | 16234 | 42   | 20.36717 | 0.047999 |
| lightgreen  | 3301 chr18q22                                      | 1  | 19  | 16234 | 42   | 20.36717 | 0.047999 |
| lightgreen  | 5229 LANDIS_ERBB2_BREAST_PRENEOPLASTIC_UP          | 1  | 19  | 16234 | 42   | 20.36717 | 0.047999 |
| lightgreen  | 6117 WILLERT_WNT_SIGNALING                         | 1  | 19  | 16234 | 42   | 20.36717 | 0.047999 |
| lightgreen  | 6828 LOPES_METHYLATED_IN_COLON_CANCER_UP           | 1  | 19  | 16234 | 42   | 20.36717 | 0.047999 |
| lightgreen  | 6860 GAVIN_IL2_RESPONSIVE_FOXP3_TARGETS_UP         | 1  | 19  | 16234 | 42   | 20.36717 | 0.047999 |
| lightgreen  | 7399 FINAK_BREAST_CANCER_SDPP_SIGNATURE            | 1  | 19  | 16234 | 42   | 20.36717 | 0.047999 |
| lightgreen  | 7526 CHIANG_LIVER_CANCER_SUBCLASS_INTERFERON_UP    | 1  | 19  | 16234 | 42   | 20.36717 | 0.047999 |
| salmon      | 1868 GGAANCGGAANY_UNKNOWN                          | 3  | 104 | 16149 | 127  | 3.691626 | 0.048017 |
| salmon      | 2871 KEGG_PARKINSONS_DISEASE                       | 3  | 104 | 16149 | 127  | 3.691626 | 0.048017 |
| salmon      | 4574 REACTOME_DNA_REPAIR                           | 3  | 104 | 16149 | 127  | 3.691626 | 0.048017 |
| purple      | 7862 CHICAS_RB1_TARGETS_GROWING                    | 5  | 204 | 16049 | 157  | 2.537311 | 0.048061 |
| cyan        | 3655 MODULE_172                                    | 2  | 74  | 16179 | 77   | 5.704809 | 0.048064 |
| cyan        | 5588 YORDY_RECIPROCAL_REGULATION_BY_ETS1_AND_SP1   | 2  | 74  | 16179 | 77   | 5.704809 | 0.048064 |
| cyan        | 7264 BOYLAN_MULTIPLE_MYELOMA_D_DN                  | 2  | 74  | 16179 | 77   | 5.704809 | 0.048064 |
| turquoise   | 707 MACROMOLECULE_BIOSYNTHETIC_PROCESS             | 87 | 289 | 15964 | 4169 | 1.173608 | 0.048094 |
| blue        | 1800 V\$MTF1_Q4                                    | 48 | 208 | 16045 | 2978 | 1.259467 | 0.048128 |
| magenta     | 3495 MODULE_2                                      | 7  | 321 | 15932 | 167  | 2.122316 | 0.048169 |
| pink        | 4968 WANG_CLIM2_TARGETS_UP                         | 7  | 235 | 16018 | 228  | 2.123386 | 0.048201 |
| magenta     | 1044 REGULATION_OF_CELL_PROLIFERATION              | 6  | 255 | 15998 | 167  | 2.289961 | 0.048213 |
| salmon      | 3766 MODULE_312                                    | 2  | 45  | 16208 | 127  | 5.687839 | 0.048216 |
| salmon      | 8134 ABRAMSON_INTERACT_WITH_AIRE                   | 2  | 45  | 16208 | 127  | 5.687839 | 0.048216 |
| blue        | 9694 GSE29618_PRE_VS_DAY7_POST_LAIV_FLU_VACCINE_P  | 32 | 131 | 16122 | 2978 | 1.333176 | 0.048219 |
| brown       | 8418 GSE10239_NAIVE_VS_DAY4.5_EFF_CD8_TCELL_UP     | 35 | 196 | 16057 | 2190 | 1.325261 | 0.048243 |
| brown       | 9252 GSE19825_CD24LOW_VS_IL2RA_HIGH_DAY3_EFF_CD8   | 35 | 196 | 16057 | 2190 | 1.325261 | 0.048243 |
| brown       | 9385 GSE22886_TH1_VS_TH2_48H_ACT_DN                | 35 | 196 | 16057 | 2190 | 1.325261 | 0.048243 |
| brown       | 9440 GSE24634_TREG_VS_TCONV_POST_DAY3_IL4_CONVERT  | 35 | 196 | 16057 | 2190 | 1.325261 | 0.048243 |
| brown       | 9782 GSE339_EX_VIVO_VS_IN_CULTURE_CD8POS_DC_UP     | 35 | 196 | 16057 | 2190 | 1.325261 | 0.048243 |
| brown       | 10254 GSE9650_NAIVE_VS_EFF_CD8_TCELL_UP            | 35 | 196 | 16057 | 2190 | 1.325261 | 0.048243 |
| magenta     | 1591 V\$GR_Q6                                      | 5  | 192 | 16061 | 167  | 2.534462 | 0.048264 |
| magenta     | 9155 GSE17974_0H_VS_2H_IN_VITRO_ACT_CD4_TCELL_DN   | 5  | 192 | 16061 | 167  | 2.534462 | 0.048264 |
| magenta     | 9979 GSE3982_EOSINOPHIL_VS_BCELL_DN                | 5  | 192 | 16061 | 167  | 2.534462 | 0.048264 |
| magenta     | 10020 GSE3982_DC_VS_EFF_MEMORY_CD4_TCELL_UP        | 5  | 192 | 16061 | 167  | 2.534462 | 0.048264 |
| magenta     | 10103 GSE39820_CTRL_VS_IL1B_IL6_IL23A_CD4_TCELL_DN | 5  | 192 | 16061 | 167  | 2.534462 | 0.048264 |
| magenta     | 10210 GSE7852_TREG_VS_TCONV_UP                     | 5  | 192 | 16061 | 167  | 2.534462 | 0.048264 |
| green       | 9429 GSE24142_ADULT_VS_FETAL_DN2_THYMOCYTE_DN      | 21 | 178 | 16075 | 1305 | 1.46934  | 0.048306 |
| turquoise   | 9939 GSE37416_0H_VS_12H_F_TULARENSIS_LVS_NEUTROPHI | 61 | 196 | 16057 | 4169 | 1.21332  | 0.048312 |
| greenyello  | 3659 MODULE_176                                    | 4  | 148 | 16105 | 150  | 2.928468 | 0.048326 |
| greenyello  | 3714 MODULE_242                                    | 4  | 148 | 16105 | 150  | 2.928468 | 0.048326 |
| greenyello  | 10067 GSE3982_BCELL_VS_NKCELL_DN                   | 4  | 148 | 16105 | 150  | 2.928468 | 0.048326 |
| brown       | 7355 CHANG_CORE_SERUM_RESPONSE_UP                  | 37 | 209 | 16044 | 2190 | 1.313847 | 0.048362 |
| brown       | 5777 GROSS_HYPOXIA_VIA_HIF1A_DN                    | 19 | 95  | 16158 | 2190 | 1.484292 | 0.048367 |
| yellow      | 6522 BAELDE_DIABETIC_NEPHROPATHY_UP                | 11 | 72  | 16181 | 1426 | 1.741302 | 0.048385 |
| yellow      | 7707 NAKAYAMA_SOFT_TISSUE_TUMORS_PCA2_UP           | 11 | 72  | 16181 | 1426 | 1.741302 | 0.048385 |
| yellow      | 7844 STAMBOLSKY_RESPONSE_TO_VITAMIN_D3_UP          | 11 | 72  | 16181 | 1426 | 1.741302 | 0.048385 |
| magenta     | 2122 CCCAGAG,MIR-326                               | 4  | 133 | 16120 | 167  | 2.927018 | 0.048388 |
| brown       | 2243 GTGACGY_V\$E4F1_Q6                            | 94 | 592 | 15661 | 2190 | 1.178408 | 0.048397 |
| greenyello  | 1466 V\$ATF_01                                     | 5  | 214 | 16039 | 150  | 2.53162  | 0.048428 |
| greenyello  | 1526 V\$CEBPB_01                                   | 5  | 214 | 16039 | 150  | 2.53162  | 0.048428 |
| turquoise   | 4963 RODRIGUES_DCC_TARGETS_DN                      | 37 | 112 | 16141 | 4169 | 1.287909 | 0.048459 |
| pink        | 9417 GSE24142_EARLY_THYMIC_PROGENITOR_VS_DN3_THY   | 6  | 187 | 16066 | 228  | 2.287222 | 0.048484 |
| lightcyan   | 1010 CELL_MATURATION                               | 1  | 13  | 16240 | 62   | 20.16501 | 0.048489 |
| lightcyan   | 2929 BIOCARTA_RANKL_PATHWAY                        | 1  | 13  | 16240 | 62   | 20.16501 | 0.048489 |
| lightcyan   | 4648 REACTOME_ACTIVATION_OF_IRF3_IRF7_MEDIATED_BY  | 1  | 13  | 16240 | 62   | 20.16501 | 0.048489 |
| lightcyan   | 5368 WONG_ENDMETRIUM_CANCER_UP                     | 1  | 13  | 16240 | 62   | 20.16501 | 0.048489 |
| lightcyan   | 5571 KORKOLA_EMBRYONAL_CARCINOMA                   | 1  | 13  | 16240 | 62   | 20.16501 | 0.048489 |
| lightcyan   | 6831 TUOMISTO_TUMOR_SUPPRESSION_BY_COL13A1_UP      | 1  | 13  | 16240 | 62   | 20.16501 | 0.048489 |

|             |                                                   |    |      |       |      |          |          |
|-------------|---------------------------------------------------|----|------|-------|------|----------|----------|
| lightcyan   | 7471 ZHAN_VARIABLE_EARLY_DIFFERENTIATION_GENES_UP | 1  | 13   | 16240 | 62   | 20.16501 | 0.048489 |
| lightcyan   | 7699 DORN_ADENOVIRUS_INFECTION_48HR_UP            | 1  | 13   | 16240 | 62   | 20.16501 | 0.048489 |
| midnightb   | 8426 GSE10325_BCELL_VS_MYELOID_UP                 | 3  | 187  | 16066 | 71   | 3.672441 | 0.048489 |
| midnightb   | 8946 GSE17721_POLYIC_VS_PAM3CSK4_24H_BMDM_UP      | 3  | 187  | 16066 | 71   | 3.672441 | 0.048489 |
| midnightb   | 9162 GSE17974_0H_VS_24H_IN_VITRO_ACT_CD4_TCELL_UP | 3  | 187  | 16066 | 71   | 3.672441 | 0.048489 |
| midnightb   | 9398 GSE22886_UNSTIM_VS_IL2_STIM_NKCELL_UP        | 3  | 187  | 16066 | 71   | 3.672441 | 0.048489 |
| midnightb   | 9863 GSE360_L_DONOVANI_VS_T_GONDII_MAC_DN         | 3  | 187  | 16066 | 71   | 3.672441 | 0.048489 |
| magenta     | 5862 SCHAEFFER_PROSTATE_DEVELOPMENT_48HR_UP       | 8  | 390  | 15863 | 167  | 1.996376 | 0.048491 |
| red         | 617 POSITIVE_REGULATION_OF_DEVELOPMENTAL_PROCES   | 11 | 193  | 16060 | 524  | 1.767818 | 0.048527 |
| red         | 8577 GSE13485_CTRL_VS_DAY3_YF17D_VACCINE_PBMCDN   | 11 | 193  | 16060 | 524  | 1.767818 | 0.048527 |
| red         | 9598 GSE27786_NKCELL_VS_NKTCELL_UP                | 11 | 193  | 16060 | 524  | 1.767818 | 0.048527 |
| brown       | 7705 NAKAYAMA_SOFT_TISSUE_TUMORS_PCA1_UP          | 14 | 65   | 16188 | 2190 | 1.598469 | 0.048549 |
| brown       | 4024 PID_P53DOWNSTREAMPATHWAY                     | 24 | 126  | 16127 | 2190 | 1.413612 | 0.048582 |
| yellow      | 7031 MOLENAAR_TARGETS_OF_CCND1_AND_CDK4_DN        | 9  | 55   | 16198 | 1426 | 1.865064 | 0.048597 |
| red         | 3507 MODULE_15                                    | 17 | 339  | 15914 | 524  | 1.555434 | 0.048611 |
| blue        | 10075 GSE3982_BASOPHIL_VS_CENT_MEMORY_CD4_TCELL_I | 42 | 179  | 16074 | 2978 | 1.280575 | 0.048622 |
| brown       | 3843 MODULE_419                                   | 8  | 31   | 16222 | 2190 | 1.915216 | 0.048627 |
| brown       | 4087 PID_SYNDECAN_2_PATHWAY                       | 8  | 31   | 16222 | 2190 | 1.915216 | 0.048627 |
| brown       | 7473 ZHAN_V1_LATE_DIFFERENTIATION_GENES_UP        | 8  | 31   | 16222 | 2190 | 1.915216 | 0.048627 |
| brown       | 7691 DANG_MYC_TARGETS_DN                          | 8  | 31   | 16222 | 2190 | 1.915216 | 0.048627 |
| brown       | 7888 FIGUEROA_AML_METHYLATION_CLUSTER_5_DN        | 8  | 31   | 16222 | 2190 | 1.915216 | 0.048627 |
| pink        | 2730 KEGG_PURINE_METABOLISM                       | 5  | 141  | 16112 | 228  | 2.52784  | 0.048657 |
| pink        | 3816 MODULE_379                                   | 5  | 141  | 16112 | 228  | 2.52784  | 0.048657 |
| brown       | 1169 PHOSPHOLIPID_BINDING                         | 10 | 42   | 16211 | 2190 | 1.767015 | 0.048703 |
| brown       | 3350 chr9q21                                      | 10 | 42   | 16211 | 2190 | 1.767015 | 0.048703 |
| brown       | 3972 PID_RHOA_REG_PATHWAY                         | 10 | 42   | 16211 | 2190 | 1.767015 | 0.048703 |
| brown       | 4223 REACTOME_PRE_NOTCH_EXPRESSION_AND_PROCESSI   | 10 | 42   | 16211 | 2190 | 1.767015 | 0.048703 |
| brown       | 6405 MCCLUNG_DELTA_FOSB_TARGETS_8WK               | 10 | 42   | 16211 | 2190 | 1.767015 | 0.048703 |
| turquoise   | 9112 GSE17721_12H_VS_24H_POLYIC_BMDM_UP           | 59 | 189  | 16064 | 4169 | 1.217004 | 0.048711 |
| lightgreen  | 4262 REACTOME_GASTRIN_CREB_SIGNALLING_PATHWAY_V   | 2  | 137  | 16116 | 42   | 5.649287 | 0.048775 |
| greenyello  | 2240 CAGGTG_V\$E12_Q6                             | 26 | 2020 | 14233 | 150  | 1.394647 | 0.048795 |
| black       | 6599 BROWNE_HCMV_INFECTION_18HR_DN                | 6  | 151  | 16102 | 283  | 2.28203  | 0.04882  |
| black       | 8223 PIGF_UP.V1_DN                                | 6  | 151  | 16102 | 283  | 2.28203  | 0.04882  |
| green       | 3927 PID_FCER1PATHWAY                             | 9  | 60   | 16193 | 1305 | 1.868161 | 0.048859 |
| green       | 4375 REACTOME_RECRUITMENT_OF_MITOTIC_CENTROSOM    | 9  | 60   | 16193 | 1305 | 1.868161 | 0.048859 |
| lightcyan   | 459 DEFENSE_RESPONSE                              | 3  | 215  | 16038 | 62   | 3.657839 | 0.048863 |
| purple      | 5069 SENESE_HDAC1_AND_HDAC2_TARGETS_UP            | 5  | 205  | 16048 | 157  | 2.524934 | 0.048895 |
| black       | 8807 GSE15930_STIM_VS_STIM_AND_TRICHOSTATINA_48H  | 7  | 190  | 16063 | 283  | 2.115882 | 0.048906 |
| blue        | 8109 PEDRIOLI_MIR31_TARGETS_UP                    | 37 | 155  | 16098 | 2978 | 1.302803 | 0.048921 |
| red         | 202 TRANSCRIPTION_FACTOR_COMPLEX                  | 6  | 82   | 16171 | 524  | 2.269549 | 0.048922 |
| red         | 929 CATION_HOMEOSTASIS                            | 6  | 82   | 16171 | 524  | 2.269549 | 0.048922 |
| red         | 7131 MATZUK_SPERMATOZOA                           | 6  | 82   | 16171 | 524  | 2.269549 | 0.048922 |
| red         | 7807 SASSON_RESPONSE_TO_GONADOTROPHINS_DN         | 6  | 82   | 16171 | 524  | 2.269549 | 0.048922 |
| green       | 10289 GSE9988_LOW_LPS_VS_CTRL_TREATED_MONOCYTE_D  | 23 | 199  | 16054 | 1305 | 1.439454 | 0.048929 |
| cyan        | 8893 GSE17721_CTRL_VS_CPG_12H_BMDM_DN             | 3  | 173  | 16080 | 77   | 3.660311 | 0.048931 |
| cyan        | 8914 GSE17721_LPS_VS_POLYIC_1H_BMDM_UP            | 3  | 173  | 16080 | 77   | 3.660311 | 0.048931 |
| cyan        | 8953 GSE17721_PAM3CSK4_VS_CPG_2H_BMDM_DN          | 3  | 173  | 16080 | 77   | 3.660311 | 0.048931 |
| cyan        | 9298 GSE20715_0H_VS_48H_OZONE_TLR4_KO_LUNG_UP     | 3  | 173  | 16080 | 77   | 3.660311 | 0.048931 |
| cyan        | 9650 GSE29617_CTRL_VS_DAY7_TIV_FLU_VACCINE_PBMCD  | 3  | 173  | 16080 | 77   | 3.660311 | 0.048931 |
| cyan        | 9839 GSE360_L_DONOVANI_VS_M_TUBERCULOSIS_DC_DN    | 3  | 173  | 16080 | 77   | 3.660311 | 0.048931 |
| lightyellow | 3617 MODULE_129                                   | 2  | 175  | 16078 | 33   | 5.628745 | 0.048948 |
| lightyellow | 5152 HAHTOLA_MYCOSIS_FUNGOIDES_SKIN_UP            | 2  | 175  | 16078 | 33   | 5.628745 | 0.048948 |
| lightyellow | 9279 GSE20366_TREG_VS_NAIVE_CD4_TCELL_DN          | 2  | 175  | 16078 | 33   | 5.628745 | 0.048948 |
| lightyellow | 9330 GSE22886_NAIVE_VS_IGM_MEMORY_BCELL_UP        | 2  | 175  | 16078 | 33   | 5.628745 | 0.048948 |
| brown       | 9840 GSE360_L_MAJOR_VS_T_GONDII_DC_UP             | 27 | 145  | 16108 | 2190 | 1.381927 | 0.048984 |
| brown       | 6230 ROSS_AML_WITH_AML1_ETO_FUSION                | 15 | 71   | 16182 | 2190 | 1.567914 | 0.048996 |
| brown       | 6243 ADDYA_ERYTHROID_DIFFERENTIATION_BY_HEMIN     | 15 | 71   | 16182 | 2190 | 1.567914 | 0.048996 |
| black       | 4054 PID_CMYB_PATHWAY                             | 4  | 79   | 16174 | 283  | 2.907904 | 0.049011 |
| red         | 5305 LUI_THYROID_CANCER_PAX8_PPARG_DN             | 4  | 43   | 16210 | 524  | 2.885319 | 0.049018 |
| red         | 5363 OLSSON_E2F3_TARGETS_DN                       | 4  | 43   | 16210 | 524  | 2.885319 | 0.049018 |

|            |                                                   |     |      |       |      |          |          |
|------------|---------------------------------------------------|-----|------|-------|------|----------|----------|
| red        | 6273 HOFMANN_CELL_LYMPHOMA_UP                     | 4   | 43   | 16210 | 524  | 2.885319 | 0.049018 |
| red        | 7238 JIANG_TIP30_TARGETS_UP                       | 4   | 43   | 16210 | 524  | 2.885319 | 0.049018 |
| red        | 7904 THILLAINADESAN_ZNF217_TARGETS_UP             | 4   | 43   | 16210 | 524  | 2.885319 | 0.049018 |
| turquoise  | 2123 GCTGAGT,MIR-512-5P                           | 17  | 45   | 16208 | 4169 | 1.472781 | 0.049042 |
| turquoise  | 2150 CAGTCAC,MIR-134                              | 17  | 45   | 16208 | 4169 | 1.472781 | 0.049042 |
| turquoise  | 7520 BOYVAULT_LIVER_CANCER_SUBCLASS_G123_UP       | 17  | 45   | 16208 | 4169 | 1.472781 | 0.049042 |
| brown      | 6614 LEE_AGING_NEOCORTEX_UP                       | 17  | 83   | 16170 | 2190 | 1.520058 | 0.049065 |
| brown      | 7809 SASSON_RESPONSE_TO_FORSKOLIN_DN              | 17  | 83   | 16170 | 2190 | 1.520058 | 0.049065 |
| turquoise  | 9100 GSE17721_12H_VS_24H_LPS_BMDM_UP              | 57  | 182  | 16071 | 4169 | 1.22097  | 0.049069 |
| lightcyan  | 3652 MODULE_169                                   | 2   | 93   | 16160 | 62   | 5.63753  | 0.04908  |
| lightcyan  | 6514 BROWNE_HCMV_INFECTION_8HR_UP                 | 2   | 93   | 16160 | 62   | 5.63753  | 0.04908  |
| magenta    | 4982 OSMAN_BLADDER_CANCER_DN                      | 8   | 391  | 15862 | 167  | 1.991271 | 0.04909  |
| yellow     | 8705 GSE1460_CD4_THYMOCYTE_VS_NAIVE_CD4_TCELL_AD  | 24  | 192  | 16061 | 1426 | 1.424702 | 0.049121 |
| yellow     | 8718 GSE14769_UNSTIM_VS_60MIN_LPS_BMDM_UP         | 24  | 192  | 16061 | 1426 | 1.424702 | 0.049121 |
| yellow     | 8728 GSE14769_20MIN_VS_360MIN_LPS_BMDM_UP         | 24  | 192  | 16061 | 1426 | 1.424702 | 0.049121 |
| yellow     | 8858 GSE17721_CTRL_VS_POLYIC_8H_BMDM_UP           | 24  | 192  | 16061 | 1426 | 1.424702 | 0.049121 |
| yellow     | 8932 GSE17721_POLYIC_VS_PAM3CSK4_1H_BMDM_UP       | 24  | 192  | 16061 | 1426 | 1.424702 | 0.049121 |
| yellow     | 9394 GSE22886_NAIVE_CD4_TCELL_VS_12H_ACT_TH2_UP   | 24  | 192  | 16061 | 1426 | 1.424702 | 0.049121 |
| yellow     | 10043 GSE3982_MAC_VS_TH1_DN                       | 24  | 192  | 16061 | 1426 | 1.424702 | 0.049121 |
| midnightb  | 8864 GSE17721_CTRL_VS_PAM3CSK4_0.5H_BMDM_UP       | 3   | 188  | 16065 | 71   | 3.652907 | 0.049126 |
| midnightb  | 8920 GSE17721_LPS_VS_POLYIC_6H_BMDM_UP            | 3   | 188  | 16065 | 71   | 3.652907 | 0.049126 |
| midnightb  | 9432 GSE24634_NAIVE_CD4_TCELL_VS_DAY3_IL4_CONV_TR | 3   | 188  | 16065 | 71   | 3.652907 | 0.049126 |
| midnightb  | 10281 GSE9988_LPS_VS_LPS_AND_ANTI_TREM1_MONOCYTE  | 3   | 188  | 16065 | 71   | 3.652907 | 0.049126 |
| pink       | 4899 HOOI_ST7_TARGETS_DN                          | 4   | 98   | 16155 | 228  | 2.909595 | 0.049126 |
| pink       | 6853 GAVIN_FOXP3_TARGETS_CLUSTER_T7               | 4   | 98   | 16155 | 228  | 2.909595 | 0.049126 |
| brown      | 1629 V\$EGR3_01                                   | 16  | 77   | 16176 | 2190 | 1.542122 | 0.049149 |
| lightgreen | 7443 MEISSNER_BRAIN_HCP_WITH_H3K4ME3_AND_H3K27M   | 5   | 779  | 15474 | 42   | 2.483801 | 0.04915  |
| magenta    | 1788 V\$GATA4_Q3                                  | 5   | 193  | 16060 | 167  | 2.52133  | 0.049154 |
| magenta    | 8501 GSE12366_PLASMA_CELL_VS_MEMORY_BCELL_DN      | 5   | 193  | 16060 | 167  | 2.52133  | 0.049154 |
| magenta    | 10097 GSE3982_NKCELL_VS_TH1_DN                    | 5   | 193  | 16060 | 167  | 2.52133  | 0.049154 |
| salmon     | 2729 KEGG_OXIDATIVE_PHOSPHORYLATION               | 3   | 105  | 16148 | 127  | 3.656468 | 0.049157 |
| tan        | 1600 V\$GRE_C                                     | 3   | 92   | 16161 | 145  | 3.655097 | 0.049174 |
| tan        | 5251 GAUSSMANN_MLL_AF4_FUSION_TARGETS_F_UP        | 4   | 154  | 16099 | 145  | 2.91142  | 0.049184 |
| purple     | 2145 CCAGGGG,MIR-331                              | 3   | 85   | 16168 | 157  | 3.653728 | 0.049192 |
| purple     | 5080 TIEN_INTESTINE_PROBIOTICS_2HR_DN             | 3   | 85   | 16168 | 157  | 3.653728 | 0.049192 |
| red        | 1025 APOPTOSIS_GO                                 | 19  | 390  | 15863 | 524  | 1.511093 | 0.049199 |
| greenyello | 3664 MODULE_181                                   | 5   | 215  | 16038 | 150  | 2.519845 | 0.049228 |
| blue       | 7923 BHAT_ESR1_TARGETS_NOT_VIA_AKT1_UP            | 43  | 184  | 16069 | 2978 | 1.275438 | 0.049231 |
| blue       | 8948 GSE17721_PAM3CSK4_VS_CPG_0.5H_BMDM_UP        | 43  | 184  | 16069 | 2978 | 1.275438 | 0.049231 |
| blue       | 9293 GSE20715_0H_VS_48H_OZONE_LUNG_DN             | 43  | 184  | 16069 | 2978 | 1.275438 | 0.049231 |
| cyan       | 1095 LIPID_BINDING                                | 2   | 75   | 16178 | 77   | 5.628745 | 0.049233 |
| cyan       | 6651 LEE_CALORIE_RESTRICTION_NEOCORTEX_DN         | 2   | 75   | 16178 | 77   | 5.628745 | 0.049233 |
| cyan       | 7375 HINATA_NFKB_TARGETS_FIBROBLAST_UP            | 2   | 75   | 16178 | 77   | 5.628745 | 0.049233 |
| yellow     | 7937 BRUINS_UVC_RESPONSE_LATE                     | 107 | 1045 | 15208 | 1426 | 1.167029 | 0.049253 |
| greenyello | 7094 IZADPANAHA_STEM_CELL_ADIPOSE_VS_BONE_DN      | 3   | 89   | 16164 | 150  | 3.65236  | 0.049254 |
| red        | 6274 GUO_HEX_TARGETS_DN                           | 5   | 62   | 16191 | 524  | 2.501385 | 0.049261 |
| red        | 6951 LIN_MELANOMA_COPY_NUMBER_UP                  | 5   | 62   | 16191 | 524  | 2.501385 | 0.049261 |
| red        | 7274 GU_PDEF_TARGETS_UP                           | 5   | 62   | 16191 | 524  | 2.501385 | 0.049261 |
| turquoise  | 1094 LIGASE_ACTIVITY_FORMING_CARBON_NITROGEN_BON  | 24  | 68   | 16185 | 4169 | 1.375954 | 0.049267 |
| turquoise  | 6235 YAO_HOXA10_TARGETS_VIA_PROGESTERONE_UP       | 24  | 68   | 16185 | 4169 | 1.375954 | 0.049267 |
| grey60     | 5040 MULLIGHAN_NPM1_SIGNATURE_3_UP                | 3   | 305  | 15948 | 44   | 3.633308 | 0.049281 |
| magenta    | 447 TISSUE_DEVELOPMENT                            | 3   | 80   | 16173 | 167  | 3.649626 | 0.049301 |
| magenta    | 600 CELLULAR_CATION_HOMEOSTASIS                   | 3   | 80   | 16173 | 167  | 3.649626 | 0.049301 |
| purple     | 2240 CAGGTG_V\$E12_Q6                             | 27  | 2020 | 14233 | 157  | 1.383714 | 0.049303 |
| yellow     | 5218 MARKEY_RB1_ACUTE_LOF_DN                      | 27  | 221  | 16032 | 1426 | 1.392469 | 0.049303 |
| salmon     | 8712 GSE1460_NAIVE_CD4_TCELL_ADULT_BLOOD_VS_THYM  | 4   | 176  | 16077 | 127  | 2.908554 | 0.049309 |
| salmon     | 9685 GSE29618_PRE_VS_DAY7_FLU_VACCINE_MDC_DN      | 4   | 176  | 16077 | 127  | 2.908554 | 0.049309 |
| red        | 1527 ACCTGTTG_UNKNOWN                             | 8   | 125  | 16128 | 524  | 1.985099 | 0.049311 |
| red        | 2090 AGCATTAMIR-155                               | 8   | 125  | 16128 | 524  | 1.985099 | 0.049311 |
| red        | 2158 AACTAC,MIR-142-3P                            | 8   | 125  | 16128 | 524  | 1.985099 | 0.049311 |

|             |                                                   |    |     |       |      |          |          |
|-------------|---------------------------------------------------|----|-----|-------|------|----------|----------|
| greenyello  | 7720 MIKKELSEN_NPC_HCP_WITH_H3K4ME3_AND_H3K27M    | 4  | 149 | 16104 | 150  | 2.908814 | 0.049318 |
| turquoise   | 8477 GSE11864_CSFI_IFNG_VS_CSFI_IFNG_PAM3CYS_IN_M | 55 | 175 | 16078 | 4169 | 1.225254 | 0.04938  |
| turquoise   | 8627 GSE14026_TH1_VS_TH17_DN                      | 55 | 175 | 16078 | 4169 | 1.225254 | 0.04938  |
| turquoise   | 9701 GSE29618_PRE_VS_DAY7_POST_TIV_FLU_VACCINE_MI | 55 | 175 | 16078 | 4169 | 1.225254 | 0.04938  |
| lightgreen  | 5683 TSAI_RESPONSE_TO_IONIZING_RADIATION          | 2  | 138 | 16115 | 42   | 5.608351 | 0.049413 |
| lightgreen  | 7177 PODAR_RESPONSE_TO_ADAPHOSTIN_UP              | 2  | 138 | 16115 | 42   | 5.608351 | 0.049413 |
| lightcyan   | 7364 VANTVEER_BREAST_CANCER_ESR1_DN               | 3  | 216 | 16037 | 62   | 3.640905 | 0.049421 |
| tan         | 3860 MODULE_448                                   | 2  | 40  | 16213 | 145  | 5.604483 | 0.049449 |
| lightyellow | 9998 GSE3982_MAST_CELL_VS_BCELL_UP                | 2  | 176 | 16077 | 33   | 5.596763 | 0.049449 |
| turquoise   | 2794 KEGG_SPLICEOSOME                             | 41 | 126 | 16127 | 4169 | 1.268572 | 0.049488 |
| green       | 1571 ARGGGTAA_UNKNOWN                             | 13 | 98  | 16155 | 1305 | 1.652115 | 0.049509 |
| green       | 2188 RYTGCNWTGGNR_UNKNOWN                         | 13 | 98  | 16155 | 1305 | 1.652115 | 0.049509 |
| pink        | 85 CYTOSOL                                        | 6  | 188 | 16065 | 228  | 2.275056 | 0.049523 |
| pink        | 8806 GSE15930_STIM_VS_STIM_AND_TRICHOSTATINA_48H  | 6  | 188 | 16065 | 228  | 2.275056 | 0.049523 |
| pink        | 9412 GSE24142_DN2_VS_DN3_THYMOCYTE_UP             | 6  | 188 | 16065 | 228  | 2.275056 | 0.049523 |
| purple      | 494 ACTIVATION_OF_MAPK_ACTIVITY                   | 2  | 37  | 16216 | 157  | 5.5958   | 0.049541 |
| purple      | 4391 REACTOME_PLG_BETA_MEDIATED_EVENTS            | 2  | 37  | 16216 | 157  | 5.5958   | 0.049541 |
| purple      | 5009 TAKEDA_TARGETS_OF_NUP98_HOXA9_FUSION_6HR_D   | 2  | 37  | 16216 | 157  | 5.5958   | 0.049541 |
| purple      | 6564 GENTILE_UV_RESPONSE_CLUSTER_D5               | 2  | 37  | 16216 | 157  | 5.5958   | 0.049541 |
| purple      | 6988 FUJII_YBX1_TARGETS_UP                        | 2  | 37  | 16216 | 157  | 5.5958   | 0.049541 |
| brown       | 351 GLYCOPROTEIN_CATABOLIC_PROCESS                | 4  | 11  | 16242 | 2190 | 2.698713 | 0.049551 |
| brown       | 552 DETECTION_OF_CHEMICAL_STIMULUS                | 4  | 11  | 16242 | 2190 | 2.698713 | 0.049551 |
| brown       | 908 CDC42_PROTEIN_SIGNAL_TRANSDUCTION             | 4  | 11  | 16242 | 2190 | 2.698713 | 0.049551 |
| brown       | 1052 REGULATION_OF_MEMBRANE_POTENTIAL             | 4  | 11  | 16242 | 2190 | 2.698713 | 0.049551 |
| brown       | 2958 BIOCARTA_P35ALZHEIMERS_PATHWAY               | 4  | 11  | 16242 | 2190 | 2.698713 | 0.049551 |
| brown       | 3078 BIOCARTA_BARR_MAPK_PATHWAY                   | 4  | 11  | 16242 | 2190 | 2.698713 | 0.049551 |
| brown       | 3731 MODULE_264                                   | 4  | 11  | 16242 | 2190 | 2.698713 | 0.049551 |
| brown       | 3870 MODULE_464                                   | 4  | 11  | 16242 | 2190 | 2.698713 | 0.049551 |
| brown       | 4182 REACTOME_IL_7_SIGNALING                      | 4  | 11  | 16242 | 2190 | 2.698713 | 0.049551 |
| brown       | 4655 REACTOME_REGULATION_OF_IFNA_SIGNALING        | 4  | 11  | 16242 | 2190 | 2.698713 | 0.049551 |
| brown       | 4750 REACTOME_THE_NLRP3_INFLAMMASOME              | 4  | 11  | 16242 | 2190 | 2.698713 | 0.049551 |
| brown       | 5463 MYLLYKANGAS_AMPLIFICATION_HOT_SPOT_24        | 4  | 11  | 16242 | 2190 | 2.698713 | 0.049551 |
| brown       | 6433 WHITESIDE_CISPLATIN_RESISTANCE_UP            | 4  | 11  | 16242 | 2190 | 2.698713 | 0.049551 |
| brown       | 7967 VANDESLUIS_COMMD1_TARGETS_GROUP_2_UP         | 4  | 11  | 16242 | 2190 | 2.698713 | 0.049551 |
| brown       | 4785 REACTOME_DIGESTION_OF_DIETARY_CARBOHYDRATE   | 2  | 3   | 16250 | 2190 | 4.947641 | 0.04956  |
| brown       | 5497 MYLLYKANGAS_AMPLIFICATION_HOT_SPOT_1         | 2  | 3   | 16250 | 2190 | 4.947641 | 0.04956  |
| brown       | 7169 SHARMA_PILOCYTIC_ASTROCYTOMA_LOCATION_DN     | 2  | 3   | 16250 | 2190 | 4.947641 | 0.04956  |
| lightyellow | 1076 HYDRO_LYASE_ACTIVITY                         | 1  | 25  | 16228 | 33   | 19.70061 | 0.049578 |
| lightyellow | 1202 EXOPEPTIDASE_ACTIVITY                        | 1  | 25  | 16228 | 33   | 19.70061 | 0.049578 |
| lightyellow | 1341 CALCIUM_CHANNEL_ACTIVITY                     | 1  | 25  | 16228 | 33   | 19.70061 | 0.049578 |
| lightyellow | 5587 SEITZ_NEOPLASTIC_TRANSFORMATION_BY_8P_DELETI | 1  | 25  | 16228 | 33   | 19.70061 | 0.049578 |
| grey60      | 538 NITROGEN_COMPOUND_METABOLIC_PROCESS           | 2  | 132 | 16121 | 44   | 5.596763 | 0.049617 |
| grey60      | 8247 E2F3_UP.V1_DN                                | 2  | 132 | 16121 | 44   | 5.596763 | 0.049617 |
| cyan        | 9136 GSE17721_12H_VS_24H_CPG_BMDM_UP              | 3  | 174 | 16079 | 77   | 3.639275 | 0.049625 |
| turquoise   | 9815 GSE360_CTRL_VS_M_TUBERCULOSIS_MAC_DN         | 53 | 168 | 16085 | 4169 | 1.229896 | 0.049636 |
| yellow      | 574 CHROMOSOME_SEGREGATION                        | 6  | 31  | 16222 | 1426 | 2.20599  | 0.049654 |
| yellow      | 5264 BARRIER_CANCER_RELAPSE_NORMAL_SAMPLE_DN      | 6  | 31  | 16222 | 1426 | 2.20599  | 0.049654 |
| lightcyan   | 7864 WANG_RESPONSE_TO_GSK3_INHIBITOR_SB216763_UF  | 4  | 363 | 15890 | 62   | 2.888652 | 0.049654 |
| blue        | 1023 REGULATION_OF_BINDING                        | 15 | 53  | 16200 | 2978 | 1.544629 | 0.049666 |
| brown       | 7983 KASLER_HDAC7_TARGETS_1_UP                    | 34 | 190 | 16063 | 2190 | 1.328051 | 0.049671 |
| brown       | 9109 GSE17721_0.5H_VS_24H_POLYIC_BMDM_DN          | 34 | 190 | 16063 | 2190 | 1.328051 | 0.049671 |
| brown       | 9345 GSE22886_IGM_MEMORY_BCELL_VS_BM_PLASMA_CE    | 34 | 190 | 16063 | 2190 | 1.328051 | 0.049671 |
| brown       | 9908 GSE36476_CTRL_VS_TSST_ACT_16H_MEMORY_CD4_T   | 34 | 190 | 16063 | 2190 | 1.328051 | 0.049671 |
| red         | 6116 TARTE_PLASMA_CELL_VS_PLASMABLAST_UP          | 16 | 315 | 15938 | 524  | 1.575476 | 0.049682 |
| purple      | 1867 V\$MYB_Q3                                    | 5  | 206 | 16047 | 157  | 2.512677 | 0.049737 |
| midnightb   | 8631 GSE14308_TH2_VS_TH17_DN                      | 3  | 189 | 16064 | 71   | 3.633579 | 0.049767 |
| midnightb   | 8766 GSE15750_WT_VS_TRAF6KO_DAY6_EFF_CD8_TCELL_U  | 3  | 189 | 16064 | 71   | 3.633579 | 0.049767 |
| midnightb   | 8773 GSE15750_DAY6_VS_DAY10_TRAF6KO_EFF_CD8_TCELL | 3  | 189 | 16064 | 71   | 3.633579 | 0.049767 |
| midnightb   | 9011 GSE17721_POLYIC_VS_CPG_6H_BMDM_DN            | 3  | 189 | 16064 | 71   | 3.633579 | 0.049767 |
| midnightb   | 9112 GSE17721_12H_VS_24H_POLYIC_BMDM_UP           | 3  | 189 | 16064 | 71   | 3.633579 | 0.049767 |

|             |                                                     |    |     |       |      |          |          |
|-------------|-----------------------------------------------------|----|-----|-------|------|----------|----------|
| midnightb   | 9427 GSE24142_ADULT_VS_FETAL_EARLY_THYMIC_PROGEN    | 3  | 189 | 16064 | 71   | 3.633579 | 0.049767 |
| turquoise   | 7657 CAIRO_LIVER_DEVELOPMENT_UP                     | 43 | 133 | 16120 | 4169 | 1.260429 | 0.049775 |
| blue        | 8773 GSE15750_DAY6_VS_DAY10_TRAF6KO_EFF_CD8_TCELL   | 44 | 189 | 16064 | 2978 | 1.270573 | 0.049801 |
| brown       | 1911 V\$AP1_Q6_01                                   | 38 | 216 | 16037 | 2190 | 1.305627 | 0.04982  |
| purple      | 2248 RTAAACA_V\$FREAC2_01                           | 12 | 728 | 15525 | 157  | 1.706411 | 0.049824 |
| brown       | 635 IMMUNE_RESPONSE                                 | 36 | 203 | 16050 | 2190 | 1.316121 | 0.049831 |
| red         | 4806 NAKAMURA_TUMOR_ZONE_PERIPHERAL_VS_CENTRAL      | 26 | 572 | 15681 | 524  | 1.409872 | 0.049836 |
| pink        | 6282 LEI_MYB_TARGETS                                | 8  | 287 | 15966 | 228  | 1.987041 | 0.04984  |
| green       | 7559 MEISSNER_NPC_HCP_WITH_H3K4ME2_AND_H3K27ME      | 22 | 189 | 16064 | 1305 | 1.449719 | 0.049874 |
| green       | 9045 GSE17721_LPS_VS_CPG_4H_BMDM_DN                 | 22 | 189 | 16064 | 1305 | 1.449719 | 0.049874 |
| pink        | 5988 KAUFFMANN_DNA_REPLICATION_GENES                | 5  | 142 | 16111 | 228  | 2.510038 | 0.049883 |
| pink        | 9250 GSE19825_NAIVE_VS_IL2RAHIGH_DAY3_EFF_CD8_TCELL | 5  | 142 | 16111 | 228  | 2.510038 | 0.049883 |
| midnightb   | 4942 LAIHO_COLORECTAL_CANCER_SERRATED_DN            | 2  | 82  | 16171 | 71   | 5.583305 | 0.049949 |
| lightyellow | 8695 GSE1460_DP_VS_CD4_THYMOCYTE_DN                 | 2  | 177 | 16076 | 33   | 5.565143 | 0.049952 |
| lightyellow | 9525 GSE2706_2H_VS_8H_LPS_STIM_DC_DN                | 2  | 177 | 16076 | 33   | 5.565143 | 0.049952 |
| lightyellow | 10061 GSE3982_BCELL_VS_BASOPHIL_DN                  | 2  | 177 | 16076 | 33   | 5.565143 | 0.049952 |
| turquoise   | 7032 ACEVEDO_NORMAL_TISSUE_ADJACENT_TO_LIVER_TUM    | 49 | 154 | 16099 | 4169 | 1.240444 | 0.049953 |
| blue        | 2678 GNF2_NS                                        | 12 | 40  | 16213 | 2978 | 1.637307 | 0.049978 |
| blue        | 4559 REACTOME_PHOSPHOLIPASE_C_MEDIATED_CASCADE      | 12 | 40  | 16213 | 2978 | 1.637307 | 0.049978 |
| lightcyan   | 5037 MULLIGHAN_MLL_SIGNATURE_1_DN                   | 3  | 217 | 16036 | 62   | 3.624127 | 0.049982 |
| lightcyan   | 7103 ZHENG_GLIOMASTOMA_PLASTICITY_UP                | 3  | 217 | 16036 | 62   | 3.624127 | 0.049982 |
| purple      | 1698 V\$FOXJ2_01                                    | 4  | 143 | 16110 | 157  | 2.895728 | 0.049989 |
